# Supplementary material for: Analysis of Argonaute Complex Bound mRNAs in DU145 Prostate Carcinoma Cells Reveals New miRNA Target Genes
Source: Hindawi journal article supplement (doi:10.1155/2017/4893921), 2017-01-01
Supplement: f1 [file 4893921.f1.pdf]

**Supplementary Table S2: Potential 3'UTR targets for miRNAs**

| Target gene | miRNA                      |
|-------------|----------------------------|
| DEDD        | miR-15b, miR-20a, miR-148a |
| TNFRSF10B   | miR-20, miR-21             |
| TP53INP1    | miR-24, miR-29a, miR-29b   |
| SPARC       | miR-29a, miR-29b           |
| ABI2        | miR-15b, miR-200c, miR-375 |
| PRDX3       | miR-23a                    |

**Supplementary Table S3**

| Gene          | Forward Primer                                    | Reverse Primer                                    |
|---------------|---------------------------------------------------|---------------------------------------------------|
| hsa-miR-20a   | ggaattctgcaaaaactgatggtggcctg                     | cgggatccccacagtcagttttgcatgg                      |
| hsa-miR-15b   | ggaattcgcgatggaattgacttggacc                      | cgggatccggttgctgtatccctgtcacac                    |
| hsa-miR-21    | gcggatccgaattcaacaggccagaaatgcctggg               | agcggatccaagtgccaccagacagaag                      |
| hsa-miR-29a   | cgaattcAgagacttgagcatctgtgga                      | cgggatccacatgcaattcaggtcagtga                     |
| ABI2          | gactagtctctgggaattacggttgagtc                     | cgagctcatctgggtacactggccat                        |
| PRDX3         | gactagtagatcacccatgtgtatctg                       | cgagctctgcaatccctggatttgat                        |
| SPARC         | gactagtctccttccacagtaccggattc                     | cgagctcgctgaccacttcccagagAAC                      |
| SPARC mut1    | ctgcctggagacaa <b>TCGTCGAC</b> catagatttaagtg     | cacttaaactctatg <b>GTCGACGA</b> attgtctccaggcag   |
| SPARC mut2    | gtgaatacattaac <b>CCCACGTG</b> aaatgaaaattctaacc  | ggttagaattttcattt <b>CACGTGGG</b> gttaatgtattcac  |
| TNFRSF10B     | ggactagtcagactctgccatgtccta                       | ggactagtcagactctgccatgtccta                       |
| TNFRSF10B mut | gtcattgttttact <b>CACGTG</b> gtttatcctaagttaaagt  | catttacattaggataaac <b>CACGTG</b> agtgaaaacaatgac |
| TP53INP1      | ggactagtcgccaagtggcaagagtgtggg                    | cgagctcgacgtcttccactccaaacgctc                    |
| TP53INP1 mut1 | gttcttcacagtgtc <b>CACGTG</b> catgaggccaggggtgcag | ctgcaccctggcctcatg <b>CACGTG</b> gacactgtgaagaac  |
| TP53INP1 mut2 | gttgtgatgggttttgac <b>GTCGAC</b> tccactctgactgat  | atcagtcagagtgga <b>GTCGAC</b> gtcaaaacccatcacaac  |

Supplementary Table S4

| Gene symbol | Gene title                                 | Enrichment | Function in Cancer                          | References                                                                | Function in PCa                   | References                                          | validated miRNAs           | References                                       | predicted miRNAs (target scan: conserved conserved among vertebrates)                                                                                                                                                                                                                                                                                                                                    |
|-------------|--------------------------------------------|------------|---------------------------------------------|---------------------------------------------------------------------------|-----------------------------------|-----------------------------------------------------|----------------------------|--------------------------------------------------|----------------------------------------------------------------------------------------------------------------------------------------------------------------------------------------------------------------------------------------------------------------------------------------------------------------------------------------------------------------------------------------------------------|
| LAMA3       | laminin, alpha 3                           | 6.891      | tumor invasion and metastasis(1, 2,3)       | (1) Choi et al. 2014, (2) Tanis et al. 2014, (3) Moller-Levet et al. 2009 | tumor invasion and metastasis (1) | (1) Sathyanarayana et al. 2013                      | miR-17/20 (1), miR-218 (2) | (1) Chang et al. 2013, (2) Kinoshita et al. 2012 | miR-17/17-5p/20ab/20b-5p/93/106ab/427/518a-3p/519d, miR-93/93a/105/106a/291a-3p/294/295/302abcde/372/373/428/519a/520be/520acd-3p/1378/1420ac, miR-217, miR-148ab-3p/152, miR-33ab/33-5p                                                                                                                                                                                                                 |
| EI24        | etoposide induced 2.4 mRNA                 | 6.813      | tumor suppressor (1)                        | (1) Mork et al. 2007                                                      | n.a.                              | n.a.                                                | miR-290/-295 (1)           | (1) Zheng et al. 2011                            | miR-22/22-3p miR-34ac/34bc-5p/449abc/449c-5p miR-183 miR-103a/107/107ab miR-129-5p/129ab-5p miR-142-3p miR-27abc/27a-3p miR-490-3p miR-203                                                                                                                                                                                                                                                               |
| ADCY3       | adenylate cyclase 3                        | 6.001      | cell migration, invasion, proliferation (1) | (1) Hong et al. 2013                                                      | n.a.                              | n.a.                                                | n.a.                       | n.a.                                             | miR-25/32/92abc/363/363-3p/367 miR-132/212/212-3p miR-128/128ab miR-205/205ab miR-26ab/1297/4465 miR-383 miR-27abc/27a-3p                                                                                                                                                                                                                                                                                |
| SDHA        | succinate dehydrogenase complex, subunit A | 5.973      | invasion (1)                                | (1) Kim et al. 2014                                                       | n.a.                              | n.a.                                                | n.a.                       | n.a.                                             | miR-375,miR-31,miR-425/425-5p/489,miR-93/93a/105/106a/291a-3p/294/295/302abcde/372/373/428/519a/520be/520acd-3p/1378/1420ac                                                                                                                                                                                                                                                                              |
| ADIPOR2     | adiponectin receptor 2                     | 5.187      | metastasis (1)                              | (1) Hiyoshi et al. 2012                                                   | PCa progression (1,2)             | (1) Rider et al. 2015, (2) Gao Q. and Zheng J. 2015 | miR-218 (1) miR-423-3p (2) | (1) Du et al. 2015, (2) Guan et al. 2014         | miR-150/5127 miR-218/218a miR-383 miR-19ab miR-200bc/429/548a miR-34ac/34bc-5p/449abc/449c-5p miR-490-3plet-7/98/4458/4500 miR-193/193b/193a-3p miR-214/761/3619-5p miR-190/190ab miR-139-5p miR-29abcd miR-124/124ab/506 miR-223 miR-425/425-5p/489 miR-499-5p miR-17/17-5p/20ab/20b-5p/93/106ab/427/518a-3p/519d miR-375 miR-122/122a/1352 miR-338/338-3p miR-216a miR-26ab/1297/4465 miR-181abcd/4262 |

|       |                                   |       |                                                |                                                       |                                                                                                                                                |                                                                                                                                                                                                                                                                                                                                                                                                                                                                                                                                         |
|-------|-----------------------------------|-------|------------------------------------------------|-------------------------------------------------------|------------------------------------------------------------------------------------------------------------------------------------------------|-----------------------------------------------------------------------------------------------------------------------------------------------------------------------------------------------------------------------------------------------------------------------------------------------------------------------------------------------------------------------------------------------------------------------------------------------------------------------------------------------------------------------------------------|
| NLK   | nemo-like kinase                  | 4.582 | cancer progression (1)<br>(1) Li et al. 2013   | cancer progression (1)<br>(1) Emami et al. 2009       | miR-199a-3p (1), miR-101 (2), miR-197 (3), miR-92b (4)<br>(1) Han et al. 2014, (2) Shen et al. 2014, (3) Zou et al. 2015, (4) Wang et al. 2013 | miR-199ab-5p miR-101/101ab miR-140/140-5p/876-3p/1244 miR-25/32/92abc/363/363-3p/367iR-208ab/208ab-3p miR-455-5p miR-221/222/222ab/1928 miR-150/5127 miR-23abc/23b-3p miR-19ab miR-27abc/27a-3p miR-26ab/1297/4465 miR-24/24ab/24-3p miR-203let-7/98/4458/4500 miR-144 miR-132/212/212-3p miR-216 miR-148ab-3p/152 miR-499-5p miR-181abcd/4262 miR-375 miR-30abc def/30abe-5p/384-5p miR-129-5p/129ab-5p                                                                                                                                |
| ATMIN | ATM interactor                    | 4.430 | tumor suppressor (1)<br>(1) Loizou et al. 2011 | n.a. n.a.                                             | n.a. n.a.                                                                                                                                      | miR-124/124ab/506 miR-135ab/135a-5p miR-217 miR-34ac/34bc-5p/449abc/449c-5p miR-138/138ab miR-200bc/429/548a miR-490-3p miR-23abc/23b-3p miR-17/17-5p/20ab/20b-5p/93/106ab/427/518a-3p/519d miR-455-5p miR-130ac/301ab/301b/301b-3p/454/721/4295/3666 miR-93/93a/105/106a/291a3p/294/295/302abcde/372/373/428/519a/20be/520acd-3p/1378/1420ac miR-194 miR-214/761/3619-5p miR-190/190ab miR-181abcd/4262 miR-146ac/146b-5p miR-103a/107/107ab miR-25/32/92abc/363/363-3p/367 miR-19ab miR150/5127 miR-24/24ab/24-3p miR-129-5p/129ab-5p |
| RAB1B | RAB1B, member RAS oncogene family | 4.293 | metastasis (1)<br>(1) Jiang et al. 2015        | tumor progression (1)<br>(1) Abd Elmageed et al. 2014 | miR-502 (1)<br>(1) Zhai et al. 2012                                                                                                            | miR-214/761/3619-5p miR-103a/107/107ab miR-184 miR-24/24ab/24-3p miR-125a-5p/125b-5p/351/670/4319 miR-31 miR-18ab/4735-3p miR-33a-3p/365/365-3p miR-148ab-3p/152 miR-138/138ab miR-122/122a/1352 miR-425/425-5p/489 miR-135ab/135a-5p miR-34ac/34bc-5p/449abc/449c-5p miR-490-3p miR-129-5p/129ab-5p miR-455-5p                                                                                                                                                                                                                         |

|           |                                                        |       |                                         |                                                                                   |                        |                                                    |      |      |                                                                                                                                                                                                                                                                                                                                                                                                                                                                                                                                                                                                                                                                                                                                                                                                                                                  |
|-----------|--------------------------------------------------------|-------|-----------------------------------------|-----------------------------------------------------------------------------------|------------------------|----------------------------------------------------|------|------|--------------------------------------------------------------------------------------------------------------------------------------------------------------------------------------------------------------------------------------------------------------------------------------------------------------------------------------------------------------------------------------------------------------------------------------------------------------------------------------------------------------------------------------------------------------------------------------------------------------------------------------------------------------------------------------------------------------------------------------------------------------------------------------------------------------------------------------------------|
| DEDD      | death effector domain containing                       | 4.019 | tumor invasion and metastasis(1, 2,3,4) | (1) Lv et al. 2012, (2) Lv et al. 2012, (3) Lv et al. 2012, (4) Stegh et al. 1998 | n.a.                   | n.a.                                               | n.a. | n.a. | miR-24/24ab/24-3p miR-148ab-3p/152 miR-130ac/301ab/301b/301b-3p/454/721/4295/3666 miR-17/17-5p/20ab/20b-5p/93/106ab/427/518a-3p/519d miR-150/5127 miR-15abc/16/16abc/195/322/424/497/1907 miR-122/122a/1352 miR-9/9ab miR-455-5p miR-10abc/10a-5p miR-7/7ab miR-145 miR-132/212/212-3p miR-23abc/23b-3p miR-1ab/206/613 miR-29abcd                                                                                                                                                                                                                                                                                                                                                                                                                                                                                                               |
| TNFRSF10B | tumor necrosis factor receptor superfamily, member 10b | 3.635 | tumor suppressor (1)                    | (1) Li et al. 2015                                                                | tumor suppressor (1,2) | (1) Van Ophoven et al. 1999, (2) Modur et al. 2002 | n.a. | n.a. | miR-145 miR-21/590-5p miR-191 miR-30abcdef/30abe-5p/384-5p miR-218/218a miR-17/17-5p/20ab/20b-5p/93/106ab/427/518a-3p/519d miR-125a-5p/125b-5p/351/670/4319 miR-93/93a/105/106a/291a-3p/294/295/302abcde/372/373/428/519a/520be/520acd-3p/1378/1420ac miR-141/200a miR-193/193b/193a-3p miR-33a-3p/365/365-3p miR-25/32/92abc/363/363-3p/367 miR-23abc/23b-3p miR-216a miR-135ab/135a-5p miR-138/138ab miR-181abcd/4262 miR-130ac/301ab/301b/301b-3p/454/721/4295/3666 miR-24/24ab/24-3p miR-29abcd miR-132/212/212-3p miR-19ab miR-143/1721/4770 miR-128/128ab miR-9/9ab miR-10abc/10a-5p miR-15abc/16/16abc/195/322/424/497/1907 miR-26ab/1297/4465 miR-203 miR-425/425-5p/489 miR-155 miR-200bc/429/548a miR-1ab/206/613                                                                                                                      |
| ABI2      | abl-interactor 2                                       | 3.267 | tumor suppressor (1,2)                  | (1) Dai et al. 1998, (2) Kano et al. 2008                                         | n.a.                   | n.a.                                               | n.a. | n.a. | miR-193/193b/193a-3p miR-205/205ab miR-187 miR-15abc/16/16abc/195/322/424/497/1907 miR-183 miR-200bc/429/548a miR-7/7ab miR-144 miR-223 miR-122/122a/1352 miR-199ab-5p miR-25/32/92abc/363/363-3p/367 miR-196abc miR-181abcd/4262 miR-217 miR-93/93a/105/106a/291a-3p/294/295/302abcde/372/373/428/519a/520be/520acd-3p/1378/1420ac miR-103a/107/107ab miR-96/507/1271 miR-23abc/23b-3p miR-375 miR-192/215 miR-150/5127 miR-139-5p miR-101/101ab miR-146ac/146b-5p miR-17/17-5p/20ab/20b-5p/93/106ab/427/518a-3p/519d miR-24/24ab/24-3p miR-155 miR-128/128ab miR-1ab/206/613 miR-214/761/3619-5p miR-129-5p/129ab-5p miR-208ab/208ab-3p miR-153 miR-216b/216b-5p miR-27abc/27a-3p miR-203 miR-499-5p miR-503 miR-142-3p miR-143/1721/4770 miR-140/140-5p/876-3p/1244 miR-145 miR-26ab/1297/4465 miR-137/137ab miR-425/425-5p/489 miR-21/590-5p |

|         |                                  |       |                                                                        |      |      |                                     |                                                                                                                                                                                                                                                                                                                                                                                                                                                                                                                                                     |                                                                                                                                                  |
|---------|----------------------------------|-------|------------------------------------------------------------------------|------|------|-------------------------------------|-----------------------------------------------------------------------------------------------------------------------------------------------------------------------------------------------------------------------------------------------------------------------------------------------------------------------------------------------------------------------------------------------------------------------------------------------------------------------------------------------------------------------------------------------------|--------------------------------------------------------------------------------------------------------------------------------------------------|
| CUL5    | cullin 5                         | 3.144 | tumor suppressor (1)<br>(1) Burnatowska-Hledin et al. 2004             | n.a. | n.a. | miR-19a/b (1)<br>(1) Xu et al. 2012 | miR-217 miR-7/7ab miR-148ab-3p/152 miR-182 miR-142-3p miR-33ab/33-5p miR-19ab miR-145 miR-338/338-3p miR-184 miR-124/124ab/506 miR-181abcd/4262 miR-192/215 miR-183 miR-146ac/146b-5p miR-375 miR-30abcdef/30abe-5p/384-5p miR-130ac/301ab/301b/301b-3p/454/721/4295/3666 miR-31 miR-138/138ab miR-221/222/222ab/1928 miR-96/507/1271 miR-214/761/3619-5p miR-205/205ab miR-144 miR-200bc/429/548a miR-132/212/212-3p miR-137/137ab miR-101/101ab miR-26ab/1297/4465 miR-17/17-5p/20ab/20b-5p/93/106ab/427/518a-3p/519d miR-194 miR-129-5p/129ab-5p |                                                                                                                                                  |
| S100A16 | S100 calcium binding protein A16 | 3.069 | invasion (1) , EMT (2)<br>(1) Tanaka et al. 2015, (2) Zhou et al. 2014 | n.a. | n.a. | n.a.                                | n.a.                                                                                                                                                                                                                                                                                                                                                                                                                                                                                                                                                | miR-29abcd miR-184 miR-24/24ab/24-3p miR-125a-5p/125b-5p/351/670/4319 miR-96/507/1271 miR-182 miR-17/17-5p/20ab/20b-5p/93/106ab/427/518a-3p/519d |

|       |                                       |        |                                                                                                                    |                            |                           |      |      |                                                                                                                                                                                               |
|-------|---------------------------------------|--------|--------------------------------------------------------------------------------------------------------------------|----------------------------|---------------------------|------|------|-----------------------------------------------------------------------------------------------------------------------------------------------------------------------------------------------|
| THY1  | Thy-1 cell surface antigen            | < 0.01 | tumor suppressor (1,3), apoptosis (2)<br>(1) Abeyasinghe et al. 2003, (2) Fujita et al. 1997, (3) Lung et al. 2005 | overexpressed (1)          | (1) True et al. 2010      | n.a. | n.a. | miR-103a/107/107ab, miR-125a-5p/125b-5p/351/670/4319                                                                                                                                          |
| MGP   | matrix Gla protein                    | < 0.01 | evtl. tumor suppressor (1)<br>(1) Levedakou et al. 1992                                                            | evtl. tumor suppressor (1) | (1) Levedakou et al. 1992 | n.a. | n.a. | miR-143/1721/4770 miR-148ab-3p/152 miR-122/122a/1352 miR-221/222/222ab/1928 miR-135ab/135a-5p miR-33ab/33-5p miR-155 miR-18ab/4735-3p miR-27abc/27a-3p miR-129-5p/129ab-5p miR-200bc/429/548a |
| POSTN | periostin, osteoblast specific factor | < 0.01 | carcinogenesis, invasion, metastasis (1)<br>(1) Kim et al. 2012                                                    | invasion (1)               | (1) Kim et al. 2012       | n.a. | n.a. | miR-19ab miR-33ab/33-5p miR-218/218a miR-18ab/4735-3p miR-135ab/135a-5p miR-101/101ab miR-144 miR-425/425-5p/489 miR-132/212/212-3p                                                           |

|       |                                                                                             |        |                                                      |                                                                      |                                                  |                                                   |                         |                                            |                                                                                                                                                                                                                                                                                                                                                                                                                                                                                                         |
|-------|---------------------------------------------------------------------------------------------|--------|------------------------------------------------------|----------------------------------------------------------------------|--------------------------------------------------|---------------------------------------------------|-------------------------|--------------------------------------------|---------------------------------------------------------------------------------------------------------------------------------------------------------------------------------------------------------------------------------------------------------------------------------------------------------------------------------------------------------------------------------------------------------------------------------------------------------------------------------------------------------|
| SPARC | secreted protein, acidic, cysteine-rich (osteonectin)                                       | < 0.01 | carcinogenesis (1), metastasis (2), migration (3)    | (1) Yamada et al. 2014, (2) Botti et al. 2014, (3) Yusuf et al. 2014 | metastasis (1), migration and invasion (2)       | (1) Derosa et al. 2012, (2) Jacob et al. 1999     | miR-29a/b (1)           | (1) Qiu et al. 2014                        | miR-29abcd miR-31 miR-192/215 miR-455-5p miR-203 miR-17/17-5p/20ab/20b-5p/93/106ab/427/518a-3p/519d miR-150/5127 miR-93/93a/105/106a/291a-3p/294/295/302abcde/372/373/428/519a/520be/520acd-3p/1378/1420ac miR-155 miR-125a-5p/125b-5p/351/670/4319 miR-204/204b/211 miR-219-5p/508/508-3p/4782-3p miR-22/22-3p miR-101/101ab miR-19ab miR-124/124ab/506 miR-205/205ab miR-18ab/4735-3p miR-34ac/34bc-5p/449abc/449c-5p miR-499-5p miR-425/425-5p/489 miR-146ac/146b-5p miR-23abc/23b-3p miR-33ab/33-5p |
| CCL2  | chemokine (C-C motif) ligand 2                                                              | < 0.01 | metastasis (1), invasion (2), cancer progression (3) | (1) Kitamura et al. 2015, (2) He et al. 2015, (3) Li et al. 2013     | migration (1), tumorigenesis (2), metastasis (2) | (1) Lin et al. 2013, (2) Zhang et al. 2010        | miR-495 (1), miR-126    | (1) Liu et al. 2015, (2) Arner et al. 2012 | miR-1ab/206/613 miR-33ab/33-5p miR-22/22-3p miR-124/124ab/506 miR-23abc/23b-3p miR-122/122a/1352                                                                                                                                                                                                                                                                                                                                                                                                        |
| CTSK  | cathepsin K                                                                                 | 0.059  | tumor progression (1,2)                              | (1) Kleer et al. 2008, (2) Herroon et al. 2013                       | metastasis progression (1), tumorigenesis (2)    | (1) Brubaker et al. 2003, (2) Nägler et al. 2004  | n.a.                    | n.a.                                       | miR-7/7ab miR-17/17-5p/20ab/20b-5p/93/106ab/427/518a-3p/519d miR-130ac/301ab/301b/301b-3p/454/721/4295/3666 miR-19ab miR-128/128ab miR-23abc/23b-3p miR-216a miR-30abcdef/30abe-5p/384-5p                                                                                                                                                                                                                                                                                                               |
| YWHAE | tyrosine 3-monooxygenase/tryptophan 5-monooxygenase activation protein, epsilon polypeptide | 0,093  | cell survival (1), translocation (2), EMT (3)        | (1) Liou et al. 2007, (2) Gremel et al. 2015, (3) Liu et al. 2013    | cell survival (1)                                | (1) Kim et al. 2012                               | n.a.                    | n.a.                                       | miR-31 miR-135ab/135a-5p miR-29abcd miR-141/200a let-7/98/4458/4500 miR-490-3p miR-26ab/1297/4465 miR-155                                                                                                                                                                                                                                                                                                                                                                                               |
| PRDX3 | peroxiredoxin 3                                                                             | 0.158  | carcinogenesis (1)                                   | (1) Kim et al. 2009                                                  | proliferation (1), cell survival (2)             | (1) Ummanni et al. 2012, (2) Whitaker et al. 2013 | miR-383(1), miR-23b (2) | (1) Li et al. 2013, (2) He et al. 2012     | miR-383 miR-31 miR-181abcd/4262 miR-18ab/4735-3p miR-26ab/1297/4465 miR-23abc/23b-3p miR-21/590-5p miR-200bc/429/548a                                                                                                                                                                                                                                                                                                                                                                                   |

|          |                                               |       |                                                                           |                                                                  |                                                                                                                 |                                                                             |                                                                                                                                                                                                                                                                                                                                                                                                                                                                                                                                                                                                                                                                                                                                                                                                                                                                       |                                                                                                                                                                                                                                                                                                                                                                                                           |
|----------|-----------------------------------------------|-------|---------------------------------------------------------------------------|------------------------------------------------------------------|-----------------------------------------------------------------------------------------------------------------|-----------------------------------------------------------------------------|-----------------------------------------------------------------------------------------------------------------------------------------------------------------------------------------------------------------------------------------------------------------------------------------------------------------------------------------------------------------------------------------------------------------------------------------------------------------------------------------------------------------------------------------------------------------------------------------------------------------------------------------------------------------------------------------------------------------------------------------------------------------------------------------------------------------------------------------------------------------------|-----------------------------------------------------------------------------------------------------------------------------------------------------------------------------------------------------------------------------------------------------------------------------------------------------------------------------------------------------------------------------------------------------------|
| CORO1C   | coronin, actin binding protein, 1C            | 0.183 | migration (1)<br>(1) Luan et al. 2010                                     | n.a.                                                             | n.a.                                                                                                            | miR-206 (1), miR-1/133a (2)<br>(1) Wang et al. 2014, (2) Mataka et al. 2015 | miR-1ab/206/613 miR-34ac/34bc-5p/449abc/449c-5p miR-182 miR-204/204b/211 miR-383 miR-133abc miR-135ab/135a-5p miR-128/128ab miR-183 miR-96/507/1271 miR-217 miR-210 miR-214/761/3619-5p miR-150/5127 miR-26ab/1297/4465 miR-29abcd miR-141/200a miR-218/218a miR-31 miR-200bc/429/548a miR-203 miR-181abcd/4262 miR-219-5p/508/508-3p/4782-3p miR-19ab miR-125a-5p/125b-5p/351/670/4319 miR-17/17-5p/20ab/20b-5p/93/106ab/427/518a-3p/519d miR-194 miR-21/590-5p miR-129-5p/129ab-5p                                                                                                                                                                                                                                                                                                                                                                                  |                                                                                                                                                                                                                                                                                                                                                                                                           |
| TP53INP1 | tumor protein p53 inducible nuclear protein 1 | 0.214 | tumor suppressor (1,2)<br>(1) Saadi et al. 2015, (2) Shahbazi et al. 2013 | proliferation (1), cell survival (1)<br>(1) Giusiano et al. 2012 | (1) Gironella et al, 2007, (2) Jiang et al. 2011, (3) Wie et al. 2012, (4) Qin et al. 2014, (5) Gao et al. 2015 | miR-155 (1), miR-125b (2), miR-17-5p (3), miR-182 (4), miR-96 (5)           | miR-22/22-3p miR-130ac/301ab/301b/301b-3p/454/721/4295/3666 miR-190/190ab miR-182 miR-217 miR-125a-5p/125b-5p/351/670/4319 miR-34ac/34bc-5p/449abc/449c-5p miR-155 miR-26ab/1297/4465 miR-124/124ab/506 miR-19ab miR-153 miR-141/200a miR-196abc miR-93/93a/105/106a/291a-3p/294/295/302abcde/372/373/428/519a/520be/520acd-3p/1378/1420ac miR-204/204b/211 miR-17/17-5p/20ab/20b-5p/93/106ab/427/518a-3p/519d miR-221/222/222ab/1928 miR-24/24ab/24-3p miR-96/507/1271 miR-193/193b/193a-3p miR-199ab-5p miR-216a miR-216b/216b-5p miR-129-5p/129ab-5p miR-455-5p miR-29abcd miR-200bc/429/548a miR-144 miR-31 miR-150/5127 miR-101/101ab miR-30abcde/30abe-5p/384-5p miR-148ab-3p/152 miR-145 miR-205/205ab miR-128/128ab miR-33ab/33-5p miR-140/140-5p/876-3p/1244 miR-23abc/23b-3p miR-191 miR-27abc/27a-3p let-7/98/4458/4500 miR-203 miR-223 miR-132/212/212-3p |                                                                                                                                                                                                                                                                                                                                                                                                           |
| TFRC     | transferrin receptor (p90, CD71)              | 0.279 | carcinogenesis (1), proliferation (1)<br>(1) O'Donnell et al. 2006        | n.a.                                                             | n.a.                                                                                                            | n.a.                                                                        | n.a.                                                                                                                                                                                                                                                                                                                                                                                                                                                                                                                                                                                                                                                                                                                                                                                                                                                                  | miR-10abc/10a-5p miR-140/140-5p/876-3p/1244 miR-31 miR-490-3p miR-210 miR-181abcd/4262 miR-338/338-3p miR-103a/107/107ab miR-193/193b/193a-3p miR-182 miR-7/7ab miR-218/218a miR-221/222/222ab/1928 miR-425/425-5p/489 miR-148ab-3p/152 miR-223 miR-124/124ab/506 miR-217 miR-96/507/1271 miR-214/761/3619-5p miR-23abc/23b-3p miR-141/200a miR-145 miR-9/9ab miR-26ab/1297/4465 miR-144 miR-216a miR-194 |



## Supplementary Table S1

| Probe Set ID | Sig log ratio_Ago2_IP_PNF8 vs ctrl._PNF8 | Fold Change_Ago2_IP_PNF8 vs ctrl._PNF8 | p-Value_Ago2_IP_PNF8 vs ctrl._PNF8 | Sig log ratio_Ago2_IP_DU145 vs ctrl._DU145 | Fold Change_Ago2_IP_DU145 vs ctrl._DU145 | p-Value_Ago2_IP_DU145 vs ctrl._DU145 | Gene Accession Number | Gene Symbol |
|--------------|------------------------------------------|----------------------------------------|------------------------------------|--------------------------------------------|------------------------------------------|--------------------------------------|-----------------------|-------------|
| 8055476      | 8,29                                     | 313,26                                 | 0,00000                            | 4,87                                       | 29,26                                    | 0,02603                              | NM_006761             | YWHAE       |
| 7965403      | 7,58                                     | 191,79                                 | 0,00001                            | -1,45                                      | -2,73                                    | 0,00042                              | NM_002345             | LUM         |
| 8146863      | 7,46                                     | 175,83                                 | 0,00000                            | -0,83                                      | -1,78                                    | 0,05130                              | NM_001128205          | SULF1       |
| 8050548      | 7,43                                     | 172,44                                 | 0,00008                            | 5,05                                       | 33,21                                    | 0,03101                              | NM_014713             | LAPTM4A     |
| 8112139      | 7,38                                     | 166,85                                 | 0,00000                            | 3,96                                       | 15,61                                    | 0,02853                              | NM_002184             | IL6ST       |
| 8115327      | 7,26                                     | 153,36                                 | 0,00002                            | -1,44                                      | -2,71                                    | 0,02283                              | NM_003118             | SPARC       |
| 8146216      | 7,23                                     | 150,04                                 | 0,00003                            | 5,67                                       | 51,06                                    | 0,00052                              | NM_001135694          | VDAC3       |
| 8154305      | 7,16                                     | 143,50                                 | 0,00028                            | 4,61                                       | 24,40                                    | 0,08064                              | NM_016275             | SELT        |
| 7971077      | 7,14                                     | 141,37                                 | 0,00000                            | -0,68                                      | -1,61                                    | 0,04170                              | NM_006475             | POSTN       |
| 7981978      | 6,99                                     | 127,02                                 | 0,00057                            | -1,24                                      | -2,37                                    | 0,58671                              | NR_003330             | SNORD116-15 |
| 7965410      | 6,98                                     | 126,18                                 | 0,00001                            | -0,90                                      | -1,87                                    | 0,00737                              | NM_001920             | DCN         |
| 8130499      | 6,90                                     | 119,32                                 | 0,00000                            | 4,06                                       | 16,72                                    | 0,00135                              | NM_006519             | DYNLT1      |
| 7961514      | 6,89                                     | 118,98                                 | 0,00008                            | -2,00                                      | -4,01                                    | 0,00926                              | NM_000900             | MGP         |
| 8046333      | 6,74                                     | 107,14                                 | 0,00002                            | 4,25                                       | 19,06                                    | 0,00006                              | NM_024843             | CYBRD1      |
| 8067007      | 6,68                                     | 102,82                                 | 0,00014                            | 2,67                                       | 6,36                                     | 0,01082                              | NM_021109             | TMSB4X      |
| 8167185      | 6,68                                     | 102,78                                 | 0,00028                            | 3,90                                       | 14,96                                    | 0,00256                              | NM_003254             | TIMP1       |
| 8042788      | 6,62                                     | 98,55                                  | 0,00029                            | -1,70                                      | -3,26                                    | 0,00688                              | NM_001615             | ACTG2       |
| 7977775      | 6,62                                     | 98,21                                  | 0,00011                            | 6,03                                       | 65,40                                    | 0,00041                              | NM_001344             | DAD1        |
| 8106986      | 6,61                                     | 97,69                                  | 0,00002                            | 3,86                                       | 14,49                                    | 0,00077                              | NM_014899             | RHOBTB3     |
| 7953603      | 6,59                                     | 96,57                                  | 0,00005                            | 0,67                                       | 1,59                                     | 0,09890                              | NM_201442             | C1S         |
| 8152512      | 6,56                                     | 94,46                                  | 0,00022                            | -0,22                                      | -1,17                                    | 0,36992                              | NM_002546             | TNFRSF11B   |
| 7939137      | 6,54                                     | 93,33                                  | 0,00001                            | 5,32                                       | 39,91                                    | 0,00179                              | NM_006360             | EIF3M       |
| 7982597      | 6,54                                     | 93,16                                  | 0,00001                            | 2,84                                       | 7,17                                     | 0,00008                              | NM_003246             | THBS1       |
| 7958019      | 6,52                                     | 92,06                                  | 0,00003                            | 4,42                                       | 21,38                                    | 0,00062                              | NM_018370             | DRAM1       |
| 8008870      | 6,45                                     | 87,27                                  | 0,00000                            | 4,02                                       | 16,18                                    | 0,03023                              | NM_030938             | TMEM49      |
| 8139087      | 6,43                                     | 86,14                                  | 0,00002                            | -0,85                                      | -1,81                                    | 0,01160                              | NM_003014             | SFRP4       |
| 8113073      | 6,38                                     | 83,01                                  | 0,00000                            | 5,42                                       | 42,87                                    | 0,00001                              | NM_020801             | ARRDC3      |
| 7938291      | 6,34                                     | 81,24                                  | 0,00064                            | 1,89                                       | 3,71                                     | 0,11699                              | NR_002580             | SNORA3      |
| 8093053      | 6,34                                     | 81,15                                  | 0,00000                            | 4,50                                       | 22,60                                    | 0,00008                              | NM_003234             | TFRC        |
| 8056201      | 6,32                                     | 79,62                                  | 0,00012                            | 5,42                                       | 42,68                                    | 0,00006                              | NM_016836             | RBMS1       |
| 8098758      | 6,27                                     | 77,16                                  | 0,00007                            | 3,23                                       | 9,37                                     | 0,03083                              | NM_133474             | ZNF721      |
| 7966135      | 6,25                                     | 76,07                                  | 0,00018                            | 3,83                                       | 14,24                                    | 0,01548                              | NM_014325             | CORO1C      |
| 8052680      | 6,25                                     | 75,92                                  | 0,00000                            | 5,34                                       | 40,61                                    | 0,00000                              | NM_004161             | RAB1A       |
| 7959023      | 6,19                                     | 72,79                                  | 0,00011                            | 4,29                                       | 19,62                                    | 0,00005                              | NM_001085481          | MAP1LC3B2   |
| 8154295      | 6,19                                     | 72,78                                  | 0,00005                            | -1,21                                      | -2,31                                    | 0,00226                              | NM_033439             | IL33        |
| 7933084      | 6,18                                     | 72,71                                  | 0,00035                            | 4,97                                       | 31,41                                    | 0,00515                              | NM_005746             | NAMPT       |
| 8178050      | 6,17                                     | 72,18                                  | 0,00146                            | 4,90                                       | 29,83                                    | 0,00126                              | NM_001320             | CSNK2B      |
| 8072407      | 6,16                                     | 71,39                                  | 0,00000                            | 4,24                                       | 18,96                                    | 0,00364                              | NR_002323             | TUG1        |
| 7962537      | 6,12                                     | 69,43                                  | 0,00003                            | 3,84                                       | 14,36                                    | 0,07746                              | NM_018976             | SLC38A2     |
| 7919815      | 6,11                                     | 69,19                                  | 0,00000                            | 2,04                                       | 4,10                                     | 0,00201                              | NM_000396             | CTSK        |
| 7979864      | 6,11                                     | 69,17                                  | 0,00311                            | 5,29                                       | 39,06                                    | 0,01907                              | NM_004450             | ERH         |
| 7964757      | 6,11                                     | 68,91                                  | 0,00024                            | 4,60                                       | 24,29                                    | 0,00067                              | NM_016836             | RBMS1       |
| 7989224      | 6,11                                     | 68,90                                  | 0,00047                            | 4,03                                       | 16,30                                    | 0,02242                              | NM_001110             | ADAM10      |
| 7917472      | 6,11                                     | 68,90                                  | 0,00001                            | 4,82                                       | 28,34                                    | 0,00005                              | NM_001514             | GTF2B       |
| 8073015      | 6,07                                     | 67,19                                  | 0,00013                            | 4,26                                       | 19,22                                    | 0,00559                              | NM_006855             | KDEL3       |
| 8091715      | 6,07                                     | 67,13                                  | 0,00001                            | -0,59                                      | -1,51                                    | 0,01144                              | NM_020169             | LXN         |
| 8155849      | 6,06                                     | 66,90                                  | 0,00327                            | 3,67                                       | 12,76                                    | 0,01822                              | NM_000700             | ANXA1       |
| 7902771      | 6,04                                     | 65,77                                  | 0,00000                            | 1,84                                       | 3,59                                     | 0,01468                              | NM_016009             | SH3GLB1     |

|         |      |       |         |       |       |         |                |          |
|---------|------|-------|---------|-------|-------|---------|----------------|----------|
| 8140828 | 6,03 | 65,39 | 0,00008 | 4,72  | 26,27 | 0,00435 | NM_003130      | SRI      |
| 8102532 | 6,02 | 65,10 | 0,00001 | 0,02  | 1,02  | 0,93876 | NM_001083      | PDE5A    |
| 8065325 | 6,02 | 64,97 | 0,00066 | 5,62  | 49,33 | 0,00127 | ---            | TMEM30A  |
| 8127637 | 6,02 | 64,86 | 0,00006 | 5,16  | 35,79 | 0,00346 | NM_018247      | TXNIP    |
| 7904726 | 6,01 | 64,37 | 0,00051 | 0,73  | 1,65  | 0,15404 | NM_006472      | DYNLL1   |
| 7980535 | 6,00 | 64,16 | 0,00005 | 5,10  | 34,40 | 0,00509 | NM_001037494   | ACTA2    |
| 7934906 | 5,99 | 63,62 | 0,00002 | 0,15  | 1,11  | 0,59950 | NM_001141945   | DAB2     |
| 8111772 | 5,98 | 63,16 | 0,00000 | 1,57  | 2,97  | 0,00176 | NM_001343      | NPC2     |
| 7980146 | 5,98 | 63,05 | 0,00031 | 4,21  | 18,54 | 0,00185 | NM_006432      | RND3     |
| 8055688 | 5,97 | 62,78 | 0,00002 | 3,07  | 8,37  | 0,01985 | NM_005168      | MYL6     |
| 7956211 | 5,97 | 62,65 | 0,00004 | 5,06  | 33,45 | 0,00018 | NM_021019      | ITGB1    |
| 7932966 | 5,96 | 62,29 | 0,00088 | 2,00  | 4,01  | 0,33091 | NM_033666      | CCL2     |
| 8006433 | 5,95 | 61,81 | 0,00009 | -2,04 | -4,12 | 0,00011 | NM_002982      | MED21    |
| 7954503 | 5,95 | 61,74 | 0,00000 | 4,98  | 31,60 | 0,00235 | NM_004264      | STRADB   |
| 7901336 | 5,94 | 61,56 | 0,00007 | 4,31  | 19,86 | 0,00145 | NM_018571      | DPP4     |
| 8056222 | 5,94 | 61,18 | 0,00001 | 1,65  | 3,14  | 0,00733 | NM_001935      | SEC23A   |
| 7978718 | 5,93 | 60,93 | 0,00001 | 3,93  | 15,21 | 0,03383 | NM_006364      | COX16    |
| 7979906 | 5,92 | 60,62 | 0,00240 | 5,89  | 59,19 | 0,00002 | NM_016468      | ZFAND5   |
| 8161747 | 5,90 | 59,87 | 0,00021 | 5,18  | 36,32 | 0,00005 | NM_001102420   | RPS25    |
| 7952129 | 5,90 | 59,84 | 0,00140 | 1,93  | 3,82  | 0,14723 | NM_001028      | RARRES1  |
| 8091723 | 5,88 | 58,77 | 0,00000 | 0,72  | 1,65  | 0,01830 | NM_206963      | CCDC80   |
| 8089544 | 5,85 | 57,84 | 0,00002 | 0,80  | 1,74  | 0,02695 | NM_199511      | KIF5B    |
| 7932911 | 5,85 | 57,65 | 0,00036 | 4,10  | 17,19 | 0,02376 | NM_004521      | RPN2     |
| 8062349 | 5,85 | 57,58 | 0,00003 | 4,89  | 29,68 | 0,00020 | NM_002951      | TMEM50A  |
| 7899005 | 5,84 | 57,47 | 0,00029 | 5,19  | 36,59 | 0,00417 | NM_014313      | STT3B    |
| 8078360 | 5,84 | 57,18 | 0,00026 | 3,83  | 14,26 | 0,01878 | NM_178862      | MINPP1   |
| 7928937 | 5,83 | 56,99 | 0,00002 | 3,90  | 14,89 | 0,03496 | NM_004897      | ASB5     |
| 8103812 | 5,83 | 56,96 | 0,00009 | -0,49 | -1,41 | 0,17975 | NM_080874      | HGF      |
| 8140556 | 5,83 | 56,76 | 0,00012 | -0,61 | -1,53 | 0,01599 | NM_000601      | IL6      |
| 8131803 | 5,82 | 56,60 | 0,00014 | 3,48  | 11,17 | 0,00229 | NM_000600      | FN1      |
| 8058765 | 5,82 | 56,43 | 0,00014 | 1,25  | 2,38  | 0,00266 | NM_212482      | SMPDL3A  |
| 8121794 | 5,82 | 56,38 | 0,00013 | 1,76  | 3,38  | 0,01420 | NM_006714      | PRDX3    |
| 7936661 | 5,82 | 56,31 | 0,00016 | 3,16  | 8,95  | 0,04830 | NM_006793      | PICALM   |
| 7950838 | 5,79 | 55,36 | 0,00001 | 4,50  | 22,63 | 0,00184 | NM_007166      | SERINC1  |
| 8129317 | 5,78 | 55,04 | 0,00006 | 4,67  | 25,48 | 0,00196 | NM_020755      | FSTL1    |
| 8089835 | 5,78 | 55,04 | 0,00001 | 1,82  | 3,53  | 0,01161 | NM_007085      | ANXA5    |
| 8102619 | 5,78 | 54,92 | 0,00002 | 4,68  | 25,56 | 0,00000 | NM_001154      | KDEL2    |
| 8138108 | 5,76 | 54,34 | 0,00005 | 4,64  | 24,94 | 0,00026 | ENST00258739   | NOP10    |
| 7987225 | 5,75 | 53,96 | 0,00001 | 3,78  | 13,73 | 0,00218 | NM_018648      | UBE2L3   |
| 7968331 | 5,75 | 53,84 | 0,00002 | 1,33  | 2,51  | 0,33839 | NM_003347      | GDI2     |
| 7931873 | 5,75 | 53,63 | 0,00133 | 4,63  | 24,73 | 0,00040 | NM_001494      | CST1     |
| 8065412 | 5,74 | 53,61 | 0,00010 | -1,47 | -2,76 | 0,05031 | NM_001898      | B2M      |
| 7983360 | 5,74 | 53,30 | 0,00000 | 3,76  | 13,54 | 0,00009 | NM_004048      | SMURF2   |
| 8017651 | 5,73 | 53,24 | 0,00004 | 3,35  | 10,20 | 0,01596 | NM_022739      | CDH11    |
| 8001800 | 5,73 | 52,99 | 0,00003 | -1,04 | -2,05 | 0,00150 | NM_001797      | SLC35F5  |
| 8054771 | 5,72 | 52,85 | 0,00002 | 5,24  | 37,87 | 0,00023 | NM_025181      | TRAPPC1  |
| 8012304 | 5,72 | 52,71 | 0,00139 | 4,85  | 28,86 | 0,00025 | NM_021210      | MOXD1    |
| 8129573 | 5,72 | 52,70 | 0,00007 | 2,04  | 4,12  | 0,00352 | NM_015529      | SERPINE2 |
| 8059376 | 5,72 | 52,53 | 0,00150 | 3,07  | 8,42  | 0,00156 | NM_001136529   | PLIN2    |
| 8160297 | 5,71 | 52,44 | 0,00001 | 4,58  | 23,94 | 0,00117 | NM_001122      | VPS35    |
| 8001149 | 5,71 | 52,39 | 0,00000 | 4,20  | 18,35 | 0,00031 | NM_018206      | SAR1A    |
| 7934122 | 5,68 | 51,35 | 0,00005 | 4,45  | 21,91 | 0,00001 | NM_001142648   | TFDP1    |
| 7970317 | 5,68 | 51,12 | 0,00020 | 5,35  | 40,88 | 0,00229 | NM_007111      | MYL12B   |
| 8019930 | 5,67 | 51,00 | 0,00283 | 5,12  | 34,78 | 0,02058 | NM_033546      | RPLP0    |
| 8109750 | 5,66 | 50,48 | 0,04419 | 4,97  | 31,31 | 0,02327 | NM_001002      | NAMPT    |
| 8142120 | 5,66 | 50,39 | 0,00013 | 4,54  | 23,21 | 0,01081 | NM_005746      | C6orf72  |
| 8122689 | 5,65 | 50,07 | 0,00001 | 3,48  | 11,12 | 0,00648 | AY358952 CSDE1 |          |
| 7918825 | 5,63 | 49,38 | 0,00000 | 2,67  | 6,38  | 0,09014 | NM_001007553   | DSTN     |
| 8061114 | 5,63 | 49,36 | 0,00014 | 3,94  | 15,33 | 0,00049 | NM_001011546   | TGFB1    |
| 8108217 | 5,61 | 48,79 | 0,00007 | 2,91  | 7,51  | 0,00011 | NM_000358      | CHP      |
| 7982878 | 5,61 | 48,73 | 0,00044 | 5,19  | 36,39 | 0,00190 | NM_007236      | WTAP     |
| 8126952 | 5,60 | 48,67 | 0,00086 | 3,91  | 15,00 | 0,00847 | NM_004906      | CALU     |
| 8135955 | 5,60 | 48,39 | 0,00003 | 4,31  | 19,89 | 0,00082 | NM_001219      | SH3BGRL  |
| 8168557 | 5,59 | 48,23 | 0,00011 | 4,15  | 17,79 | 0,00205 | NM_003022      | SERPINE1 |
| 8135069 | 5,59 | 48,18 | 0,00035 | -0,91 | -1,88 | 0,02458 | NM_000602      | ARPC2    |
| 8048234 | 5,59 | 48,14 | 0,00279 | 4,47  | 22,20 | 0,02089 | NM_152862      | PBX3     |
| 8157890 | 5,59 | 48,07 | 0,00000 | 3,10  | 8,56  | 0,01906 | NM_006195      | TMEM47   |
| 8172022 | 5,58 | 47,81 | 0,00004 | -2,06 | -4,17 | 0,00002 | NM_031442      | ARPC3    |
| 7966315 | 5,58 | 47,80 | 0,00020 | 4,51  | 22,76 | 0,00037 | NM_005719      | MMD      |
| 8016832 | 5,57 | 47,59 | 0,00052 | 5,57  | 47,51 | 0,00020 | NM_012329      | TMBIM6   |
| 7955277 | 5,57 | 47,44 | 0,00224 | 5,48  | 44,49 | 0,00268 | NM_003217      | THY1     |
| 7952268 | 5,57 | 47,39 | 0,00002 | -1,91 | -3,77 | 0,00063 | NM_006288      | CLTC     |
| 8008834 | 5,56 | 47,21 | 0,00075 | 2,73  | 6,64  | 0,06836 | NM_004859      | CD59     |

|         |      |       |         |       |        |         |              |             |
|---------|------|-------|---------|-------|--------|---------|--------------|-------------|
| 7947425 | 5,56 | 47,18 | 0,00049 | 3,98  | 15,83  | 0,00007 | NM_203330    | IGFBP5      |
| 8058857 | 5,56 | 47,17 | 0,00007 | -0,38 | -1,31  | 0,07184 | NM_000599    | SDCBP       |
| 8146550 | 5,56 | 47,02 | 0,00002 | 4,41  | 21,33  | 0,00036 | NM_005625    | HSP90B1     |
| 7958130 | 5,55 | 46,86 | 0,00019 | 3,57  | 11,86  | 0,05324 | NM_003299    | TMBIM1      |
| 8058927 | 5,55 | 46,82 | 0,00014 | 4,78  | 27,39  | 0,00116 | NM_022152    | RLIM        |
| 8173613 | 5,55 | 46,77 | 0,00105 | 3,25  | 9,49   | 0,00628 | NM_016120    | TMSB4X      |
| 8166072 | 5,55 | 46,70 | 0,00029 | 1,80  | 3,49   | 0,02279 | NM_021109    | LPHN2       |
| 7902565 | 5,54 | 46,59 | 0,00011 | -0,50 | -1,42  | 0,11679 | NM_012302    | MRPL45      |
| 8006762 | 5,53 | 46,25 | 0,00448 | 6,97  | 125,16 | 0,00016 | NM_032351    | PCMTD1      |
| 8150714 | 5,52 | 45,90 | 0,00041 | 4,78  | 27,47  | 0,00314 | NM_052937    | TAF9B       |
| 8173732 | 5,52 | 45,87 | 0,00036 | 3,38  | 10,43  | 0,00700 | NM_015975    | TAF9B       |
| 8176263 | 5,52 | 45,87 | 0,00036 | 3,38  | 10,43  | 0,00700 | NM_015975    | CLDN11      |
| 8083887 | 5,50 | 45,27 | 0,00053 | 1,28  | 2,42   | 0,05238 | NM_005602    | WARS        |
| 7981290 | 5,49 | 44,95 | 0,00046 | 4,67  | 25,50  | 0,00055 | NM_004184    | SUZ12       |
| 8006325 | 5,48 | 44,66 | 0,00015 | 3,73  | 13,25  | 0,00231 | NM_015355    | LOX         |
| 8113709 | 5,48 | 44,66 | 0,00002 | -1,12 | -2,17  | 0,05231 | NM_002317    | NT5E        |
| 8120967 | 5,48 | 44,65 | 0,00033 | 4,15  | 17,77  | 0,00028 | NM_002526    | HSPA8       |
| 7952325 | 5,48 | 44,64 | 0,01023 | 3,34  | 10,10  | 0,05482 | NM_006597    | EDIL3       |
| 8112980 | 5,47 | 44,37 | 0,00023 | 5,15  | 35,46  | 0,00541 | NM_005711    | SEMA3A      |
| 8140668 | 5,46 | 44,12 | 0,00005 | 0,58  | 1,50   | 0,15589 | NM_006080    | SEC63       |
| 8128650 | 5,46 | 44,12 | 0,00010 | 4,84  | 28,58  | 0,00007 | NM_007214    | SC5DL       |
| 7944656 | 5,45 | 43,73 | 0,00188 | 4,82  | 28,32  | 0,00118 | NM_006918    | TIMP3       |
| 8075635 | 5,44 | 43,54 | 0,00021 | -0,29 | -1,23  | 0,22797 | NM_000362    | LDHA        |
| 7938777 | 5,44 | 43,52 | 0,00107 | 5,21  | 36,91  | 0,00000 | NM_005566    | ELOVL5      |
| 8127145 | 5,44 | 43,34 | 0,00085 | 4,93  | 30,46  | 0,00030 | NM_021814    | SOD2        |
| 8130556 | 5,44 | 43,33 | 0,00025 | 2,34  | 5,06   | 0,01029 | NM_001024465 | ---         |
| 7974471 | 5,43 | 43,07 | 0,00020 | 1,75  | 3,36   | 0,17921 | ---          | COPA        |
| 7921583 | 5,43 | 43,06 | 0,00026 | 4,06  | 16,65  | 0,00605 | NM_001098398 | OSMR        |
| 8105040 | 5,43 | 43,01 | 0,00041 | 3,77  | 13,62  | 0,03171 | NM_003999    | ZNF737      |
| 8035793 | 5,43 | 43,01 | 0,00674 | 2,68  | 6,40   | 0,01509 | NM_001159293 | STAM2       |
| 8055890 | 5,42 | 42,91 | 0,00003 | 4,44  | 21,72  | 0,00025 | NM_005843    | TMSB4X      |
| 8158240 | 5,42 | 42,91 | 0,00006 | 1,56  | 2,95   | 0,00328 | NM_021109    | RAB7A       |
| 8082431 | 5,42 | 42,75 | 0,00269 | 5,19  | 36,46  | 0,00047 | NM_004637    | MTCH2       |
| 7947934 | 5,42 | 42,72 | 0,00029 | 5,01  | 32,24  | 0,00180 | NM_014342    | ZNF253      |
| 8035779 | 5,41 | 42,48 | 0,00499 | 3,51  | 11,39  | 0,00323 | NM_021047    | PLAT        |
| 8150509 | 5,40 | 42,34 | 0,00003 | -1,29 | -2,44  | 0,00109 | NM_000930    | CSNK2B      |
| 8118218 | 5,40 | 42,25 | 0,00262 | 4,26  | 19,18  | 0,00028 | NM_001320    | RSU1        |
| 7932311 | 5,40 | 42,15 | 0,00106 | 3,93  | 15,27  | 0,00329 | NM_012425    | STRADB      |
| 8047443 | 5,40 | 42,13 | 0,00001 | 4,45  | 21,88  | 0,00010 | NM_018571    | RBBP7       |
| 8171516 | 5,40 | 42,10 | 0,00072 | 5,39  | 42,04  | 0,00560 | NM_002893    | CRYZ        |
| 7917037 | 5,39 | 42,05 | 0,00005 | 4,58  | 23,90  | 0,00050 | NM_001130042 | F           |
| 7938313 | 5,39 | 42,02 | 0,00242 | 3,37  | 10,31  | 0,07729 | NM_006391    | TXN         |
| 8163185 | 5,38 | 41,72 | 0,00090 | 4,54  | 23,22  | 0,00000 | NM_003329    | HIF1A       |
| 7974851 | 5,38 | 41,69 | 0,00014 | 3,60  | 12,13  | 0,02619 | NM_001530    | FNDC3B      |
| 8083901 | 5,38 | 41,62 | 0,00008 | 2,85  | 7,21   | 0,01342 | NM_022763    | KIAA1715    |
| 8056943 | 5,37 | 41,34 | 0,00019 | 3,87  | 14,64  | 0,00024 | NM_030650    | GLIPR1      |
| 7957260 | 5,36 | 41,20 | 0,00002 | -0,22 | -1,17  | 0,43382 | NM_006851    | PTGIS       |
| 8066925 | 5,36 | 41,07 | 0,00022 | 0,45  | 1,36   | 0,31474 | NM_000961    | ADAM9       |
| 8146000 | 5,36 | 41,06 | 0,00008 | 4,28  | 19,48  | 0,00042 | NM_003816    | SSB         |
| 8046201 | 5,36 | 40,99 | 0,00050 | 2,11  | 4,32   | 0,14063 | NM_003142    | GNG10       |
| 7946559 | 5,36 | 40,98 | 0,00099 | 5,33  | 40,18  | 0,00008 | NM_001017998 | MRPL50      |
| 8162880 | 5,36 | 40,96 | 0,00258 | 3,72  | 13,14  | 0,00752 | NM_019051    | NDUFB4      |
| 8081945 | 5,35 | 40,74 | 0,00008 | 3,40  | 10,56  | 0,00398 | NM_004547    | NDUFB4      |
| 8093314 | 5,35 | 40,74 | 0,00008 | 3,40  | 10,56  | 0,00398 | NM_004547    | PCDH18      |
| 8102792 | 5,34 | 40,63 | 0,00069 | -0,70 | -1,63  | 0,06795 | NM_019035    | SERINC3     |
| 8066417 | 5,34 | 40,59 | 0,00073 | 4,81  | 28,11  | 0,01519 | NM_006811    | MMADHC      |
| 8055672 | 5,33 | 40,18 | 0,00005 | 4,99  | 31,81  | 0,00010 | NM_015702    | PPP6C       |
| 8164155 | 5,32 | 39,85 | 0,00012 | 4,85  | 28,89  | 0,01318 | NM_001123355 | IARS        |
| 8162313 | 5,31 | 39,70 | 0,00010 | 3,97  | 15,72  | 0,06240 | NM_013417    | PMP22       |
| 8012896 | 5,31 | 39,64 | 0,00131 | 3,56  | 11,82  | 0,00000 | NM_000304    | PTX3        |
| 8083594 | 5,31 | 39,53 | 0,00008 | -0,10 | -1,07  | 0,43973 | NM_002852    | C14orf156   |
| 7975989 | 5,30 | 39,42 | 0,00050 | 5,38  | 41,74  | 0,00001 | NM_031210    | MDM2        |
| 7956989 | 5,30 | 39,40 | 0,00033 | 3,59  | 12,08  | 0,01435 | NM_002392    | GNG12       |
| 7916843 | 5,30 | 39,37 | 0,00006 | 3,72  | 13,16  | 0,00339 | NM_018841    | TFPI        |
| 8057599 | 5,30 | 39,35 | 0,00024 | 3,96  | 15,54  | 0,00222 | NM_006287    | GLRX        |
| 8113214 | 5,30 | 39,35 | 0,00042 | 2,96  | 7,76   | 0,00424 | NM_002064    | NDUFA2      |
| 8114618 | 5,30 | 39,34 | 0,00087 | 4,65  | 25,13  | 0,00012 | NM_002488    | CAV1        |
| 8135594 | 5,30 | 39,29 | 0,00003 | 4,51  | 22,78  | 0,00032 | NM_001753    | ZNF91       |
| 8035842 | 5,29 | 39,16 | 0,00020 | 2,43  | 5,38   | 0,01102 | NM_003430    | A2M         |
| 7960947 | 5,29 | 39,08 | 0,00013 | -1,30 | -2,47  | 0,03658 | NM_000014    | SNORD116-24 |
| 7981996 | 5,29 | 39,08 | 0,00270 | -1,58 | -2,99  | 0,53280 | NR_003338    | CLDN12      |
| 8134091 | 5,28 | 38,88 | 0,00033 | 4,87  | 29,17  | 0,00055 | NM_012129    | VCAN        |
| 8106743 | 5,28 | 38,82 | 0,00092 | -1,16 | -2,23  | 0,00734 | NM_004385    | NDUFB5      |

|         |      |       |         |       |       |         |              |             |
|---------|------|-------|---------|-------|-------|---------|--------------|-------------|
| 8084092 | 5,28 | 38,74 | 0,00059 | 4,52  | 22,97 | 0,00029 | NM_002492    | FAM48A      |
| 7971039 | 5,27 | 38,50 | 0,00004 | 3,99  | 15,84 | 0,00596 | NM_001014286 | TES         |
| 8135576 | 5,26 | 38,39 | 0,00030 | 5,18  | 36,32 | 0,00005 | NM_015641    | VAMP7       |
| 8171041 | 5,25 | 38,18 | 0,00016 | 4,69  | 25,73 | 0,00223 | NM_005638    | VAMP7       |
| 8176962 | 5,25 | 38,18 | 0,00016 | 4,69  | 25,73 | 0,00223 | NM_005638    | LPAR1       |
| 8163257 | 5,25 | 38,18 | 0,00001 | 3,19  | 9,10  | 0,00033 | NM_057159    | TMTC3       |
| 7957478 | 5,25 | 38,09 | 0,00001 | 3,60  | 12,09 | 0,00486 | NM_181783    | SLAIN2      |
| 8094948 | 5,25 | 37,98 | 0,00034 | 3,20  | 9,16  | 0,03267 | NM_020846    | CFH         |
| 7908459 | 5,25 | 37,97 | 0,00000 | -0,80 | -1,74 | 0,01860 | NM_000186    | ---         |
| 8100125 | 5,25 | 37,97 | 0,00050 | 4,46  | 22,06 | 0,00004 | ---          | MRPL20      |
| 7911559 | 5,23 | 37,49 | 0,00086 | 5,32  | 39,87 | 0,00002 | NM_017971    | MRPL20      |
| 8039939 | 5,23 | 37,49 | 0,00086 | 5,32  | 39,87 | 0,00002 | NM_017971    | GNS         |
| 7964701 | 5,23 | 37,48 | 0,00008 | 5,30  | 39,28 | 0,00015 | NM_002076    | BZW11L1     |
| 8047339 | 5,22 | 37,26 | 0,00003 | 4,51  | 22,78 | 0,00490 | NR_026584    | MID1        |
| 8171297 | 5,21 | 37,13 | 0,00010 | 4,14  | 17,58 | 0,00082 | NM_000381    | SNORD49B    |
| 8005200 | 5,21 | 37,06 | 0,00311 | 2,38  | 5,19  | 0,14211 | NR_003043    | CD164       |
| 8128716 | 5,21 | 37,01 | 0,00043 | 4,84  | 28,58 | 0,00073 | NM_006016    | PAPOLA      |
| 7976598 | 5,21 | 36,95 | 0,00102 | 4,91  | 30,00 | 0,01483 | NM_032632    | EIF3H       |
| 8152465 | 5,20 | 36,83 | 0,00002 | 2,74  | 6,69  | 0,01123 | NM_003756    | RPF2        |
| 8121510 | 5,20 | 36,79 | 0,00171 | 3,44  | 10,84 | 0,04782 | NM_032194    | PLS3        |
| 8169473 | 5,20 | 36,66 | 0,00002 | 4,13  | 17,57 | 0,00207 | NM_005032    | ARCN1       |
| 7944285 | 5,20 | 36,64 | 0,00113 | 3,72  | 13,18 | 0,00236 | NM_001655    | MMP2        |
| 7995681 | 5,19 | 36,62 | 0,00002 | -1,47 | -2,77 | 0,02427 | NM_004530    | WBP11       |
| 7961489 | 5,19 | 36,42 | 0,00037 | 4,15  | 17,72 | 0,00018 | NM_016312    | RAB23       |
| 8127346 | 5,18 | 36,37 | 0,00003 | 3,40  | 10,53 | 0,00080 | NM_016277    | ATP6V0E1    |
| 8110022 | 5,18 | 36,36 | 0,00020 | 5,29  | 39,22 | 0,00017 | NM_003945    | SEC24B      |
| 8096781 | 5,18 | 36,29 | 0,00011 | 2,91  | 7,51  | 0,08840 | NM_006323    | HIST1H2BK   |
| 8124492 | 5,18 | 36,25 | 0,00134 | 3,26  | 9,57  | 0,06596 | NM_080593    | NCRNA00152  |
| 8054611 | 5,18 | 36,15 | 0,00291 | 4,59  | 24,17 | 0,00144 | NR_024204    | LPCAT3      |
| 7960730 | 5,17 | 36,03 | 0,00060 | 5,72  | 52,77 | 0,00002 | NM_005768    | MAGED1      |
| 8167656 | 5,17 | 35,93 | 0,00002 | 3,95  | 15,46 | 0,00008 | NM_001005333 | CD302       |
| 8056102 | 5,16 | 35,86 | 0,00020 | 2,53  | 5,76  | 0,00982 | NM_014880    | NDUFA12     |
| 7965515 | 5,16 | 35,73 | 0,00729 | 2,40  | 5,26  | 0,11301 | NM_018838    | TMED10      |
| 7980296 | 5,16 | 35,71 | 0,00000 | 4,95  | 30,98 | 0,00323 | NM_006827    | GBP1        |
| 7917516 | 5,16 | 35,70 | 0,00009 | -0,23 | -1,17 | 0,62753 | NM_002053    | GABARAP     |
| 8012110 | 5,15 | 35,63 | 0,00758 | 5,96  | 62,06 | 0,00076 | NM_007278    | SPPL2A      |
| 7988753 | 5,15 | 35,61 | 0,00025 | 5,34  | 40,40 | 0,00072 | NM_032802    | TMSL3       |
| 8101774 | 5,15 | 35,55 | 0,00034 | 1,61  | 3,06  | 0,04978 | NM_183049    | SPCS2       |
| 7942553 | 5,15 | 35,52 | 0,00016 | 3,64  | 12,43 | 0,00107 | NM_014752    | DDR2        |
| 7906878 | 5,15 | 35,50 | 0,00041 | 0,28  | 1,21  | 0,33561 | NM_001014796 | GPR137B     |
| 7910680 | 5,15 | 35,46 | 0,00005 | 4,22  | 18,60 | 0,00002 | NM_003272    | SEC31A      |
| 8101376 | 5,14 | 35,29 | 0,00011 | 3,43  | 10,75 | 0,03804 | NM_014933    | ERLIN1      |
| 7935692 | 5,14 | 35,27 | 0,00033 | 3,93  | 15,22 | 0,01877 | NM_001100626 | WIPI1       |
| 8017850 | 5,14 | 35,20 | 0,00014 | 3,63  | 12,40 | 0,00008 | NM_017983    | RGS2        |
| 7908409 | 5,13 | 35,09 | 0,00123 | 3,90  | 14,95 | 0,00003 | NM_002923    | USO1        |
| 8095773 | 5,13 | 35,07 | 0,00005 | 4,05  | 16,55 | 0,00002 | NM_003715    | ---         |
| 8163714 | 5,13 | 35,02 | 0,00024 | 2,15  | 4,42  | 0,01467 | ---          | VDAC2       |
| 8042335 | 5,12 | 34,86 | 0,00008 | 5,27  | 38,58 | 0,00034 | NM_003375    |             |
| 8045919 | 5,12 | 34,79 | 0,00042 | 3,88  | 14,73 | 0,00094 | NM_022826    | CNOT7       |
| 8149475 | 5,12 | 34,77 | 0,00138 | 4,88  | 29,37 | 0,00393 | NM_013354    | AP3M1       |
| 7934513 | 5,12 | 34,75 | 0,00016 | 4,16  | 17,86 | 0,00536 | NM_207012    | EIF3D       |
| 8075798 | 5,12 | 34,73 | 0,00029 | 3,68  | 12,79 | 0,02495 | NM_003753    | PAFAH1B2    |
| 7944042 | 5,12 | 34,72 | 0,00068 | 2,65  | 6,28  | 0,00091 | NM_002572    | CAP1        |
| 7900382 | 5,10 | 34,31 | 0,00020 | 3,71  | 13,13 | 0,00227 | NM_006367    | NME2P1      |
| 7959146 | 5,10 | 34,27 | 0,00003 | 4,89  | 29,73 | 0,00189 | NR_001577    | SDHB        |
| 7912928 | 5,10 | 34,20 | 0,00005 | 3,31  | 9,91  | 0,00052 | NM_003000    | STOM        |
| 8157605 | 5,09 | 34,17 | 0,00011 | -0,28 | -1,22 | 0,61064 | NM_004099    | RAB14       |
| 8163882 | 5,09 | 34,07 | 0,00029 | 3,79  | 13,86 | 0,02367 | NM_016322    | CCNG1       |
| 8109697 | 5,09 | 34,01 | 0,00004 | 3,73  | 13,29 | 0,00012 | NM_004060    | RAP1B       |
| 8112728 | 5,09 | 33,97 | 0,00002 | 3,84  | 14,34 | 0,00182 | NM_015646    | CDC42EP3    |
| 8051573 | 5,08 | 33,86 | 0,00033 | 2,77  | 6,84  | 0,00277 | NM_006449    | REEP5       |
| 8113542 | 5,07 | 33,70 | 0,00003 | 4,54  | 23,21 | 0,00897 | NM_005669    | RPL24       |
| 8126450 | 5,07 | 33,68 | 0,00297 | 4,28  | 19,49 | 0,00193 | NM_000986    | C7orf23     |
| 8140730 | 5,07 | 33,52 | 0,00100 | 3,65  | 12,55 | 0,00027 | NM_024315    | SUMO2       |
| 8174636 | 5,06 | 33,41 | 0,00075 | 4,56  | 23,58 | 0,00033 | NM_006937    | UXT         |
| 8172358 | 5,06 | 33,36 | 0,00005 | 4,42  | 21,36 | 0,00190 | NM_153477    | PIAS1       |
| 7984453 | 5,06 | 33,26 | 0,00004 | 4,00  | 16,03 | 0,03053 | NM_016166    | TUBA1A      |
| 7963054 | 5,06 | 33,25 | 0,00094 | 2,78  | 6,86  | 0,00872 | NM_006009    | SOS2        |
| 7978932 | 5,05 | 33,24 | 0,00037 | 3,71  | 13,07 | 0,01947 | NM_006939    | ACO1        |
| 8154733 | 5,05 | 33,15 | 0,00006 | 3,96  | 15,53 | 0,00153 | NM_002197    | CD46        |
| 7909400 | 5,04 | 32,91 | 0,00048 | 3,58  | 11,94 | 0,03890 | NM_002389    | SNORD116-14 |
| 7981976 | 5,04 | 32,90 | 0,00185 | -1,56 | -2,94 | 0,49142 | NR_003329    | SHOC2       |
| 7930470 | 5,04 | 32,87 | 0,00053 | 4,67  | 25,41 | 0,00350 | NM_007373    | GTF2A2      |

|         |      |       |         |       |       |         |              |          |
|---------|------|-------|---------|-------|-------|---------|--------------|----------|
| 7989315 | 5,04 | 32,85 | 0,00025 | 4,06  | 16,64 | 0,00064 | NM_004492    | C11orf10 |
| 7948606 | 5,03 | 32,64 | 0,00126 | 3,95  | 15,42 | 0,01054 | NM_014206    | FKBP1A   |
| 8120428 | 5,03 | 32,63 | 0,00302 | 3,20  | 9,21  | 0,01587 | NM_000801    | NPEPPS   |
| 8007976 | 5,02 | 32,47 | 0,00002 | 3,83  | 14,25 | 0,00299 | NM_006310    | OSBPL8   |
| 7965064 | 5,02 | 32,43 | 0,00003 | 3,45  | 10,95 | 0,00342 | NM_020841    | ATP6V0D1 |
| 8002041 | 5,01 | 32,31 | 0,00278 | 4,57  | 23,69 | 0,00001 | NM_004691    | FERMT2   |
| 7979204 | 5,01 | 32,29 | 0,00002 | 3,76  | 13,51 | 0,00007 | NM_006832    | TMEM181  |
| 8123062 | 5,01 | 32,17 | 0,00014 | 3,85  | 14,38 | 0,00004 | NM_020823    | PPP1CC   |
| 7966368 | 5,00 | 32,10 | 0,00015 | 5,75  | 53,98 | 0,00049 | NM_002710    | LMAN1    |
| 8023561 | 5,00 | 31,92 | 0,00030 | 4,47  | 22,18 | 0,00015 | NM_005570    | PDIA6    |
| 8050278 | 4,99 | 31,81 | 0,00152 | 4,09  | 17,04 | 0,00424 | NM_005742    | PSMB2    |
| 7914834 | 4,99 | 31,77 | 0,00169 | 4,02  | 16,20 | 0,00071 | NM_002794    | GNB2L1   |
| 8116520 | 4,99 | 31,74 | 0,02416 | 3,82  | 14,14 | 0,06583 | NM_006098    | CAST     |
| 8107005 | 4,99 | 31,68 | 0,00010 | 2,38  | 5,22  | 0,05201 | NM_001750    | SLC39A9  |
| 7975344 | 4,98 | 31,66 | 0,00054 | 5,12  | 34,68 | 0,00000 | NM_018375    | PXDN     |
| 8050007 | 4,98 | 31,49 | 0,00020 | -0,08 | -1,06 | 0,36729 | NM_012293    | GTF2H1   |
| 7938762 | 4,97 | 31,43 | 0,00007 | 3,44  | 10,84 | 0,00037 | NM_005316    | PCYOX1   |
| 8042519 | 4,97 | 31,35 | 0,00013 | 3,65  | 12,57 | 0,00001 | NM_016297    | CRYAB    |
| 7951662 | 4,97 | 31,25 | 0,00006 | -1,32 | -2,50 | 0,10600 | NM_001885    | TNFAIP1  |
| 8005847 | 4,96 | 31,20 | 0,00002 | 5,31  | 39,63 | 0,00001 | NM_021137    | UTP11L   |
| 7900201 | 4,96 | 31,07 | 0,00005 | 3,67  | 12,69 | 0,00050 | NM_016037    | SUMO2    |
| 8018315 | 4,96 | 31,07 | 0,00100 | 4,02  | 16,22 | 0,00140 | NM_006937    | TRAM1    |
| 8151281 | 4,96 | 31,04 | 0,00012 | 3,82  | 14,09 | 0,00004 | NM_014294    | CANX     |
| 8110522 | 4,96 | 31,04 | 0,00114 | 3,14  | 8,83  | 0,02348 | NM_001746    | YWHAE    |
| 8011011 | 4,95 | 30,93 | 0,00520 | 4,36  | 20,47 | 0,03386 | NR_024058    | USP53    |
| 8097098 | 4,95 | 30,92 | 0,00002 | 3,05  | 8,27  | 0,00035 | NM_019050    | CSE1L    |
| 8063283 | 4,95 | 30,91 | 0,00004 | 3,77  | 13,62 | 0,00252 | NM_001316    | PPP1R12A |
| 7965123 | 4,95 | 30,90 | 0,00001 | 3,36  | 10,30 | 0,03800 | NM_001143885 | MRPL47   |
| 8092265 | 4,94 | 30,79 | 0,00000 | 2,73  | 6,64  | 0,01365 | NM_020409    | XPOT     |
| 7956785 | 4,94 | 30,78 | 0,00019 | 3,88  | 14,72 | 0,00340 | NM_007235    | PSMD7    |
| 7997230 | 4,94 | 30,74 | 0,00031 | 4,73  | 26,45 | 0,00006 | NM_002811    | PIGY     |
| 8101718 | 4,94 | 30,72 | 0,00005 | 3,62  | 12,32 | 0,00091 | NM_032906    | SLIT2    |
| 8094301 | 4,94 | 30,69 | 0,00005 | 0,28  | 1,21  | 0,16770 | NM_004787    | GPX8     |
| 8105348 | 4,93 | 30,59 | 0,00051 | 2,80  | 6,97  | 0,00063 | NM_001008397 | GARS     |
| 8132070 | 4,93 | 30,51 | 0,00026 | 5,05  | 33,15 | 0,00632 | NM_002047    | CYP1B1   |
| 8051583 | 4,93 | 30,45 | 0,00005 | 3,70  | 12,96 | 0,00019 | NM_000104    | ITM2B    |
| 7969003 | 4,93 | 30,45 | 0,00030 | 3,06  | 8,35  | 0,00882 | NM_021999    | C1orf152 |
| 7904974 | 4,93 | 30,41 | 0,00654 | 1,08  | 2,11  | 0,04470 | NR_003242    | RB1      |
| 7969017 | 4,93 | 30,41 | 0,00002 | 4,15  | 17,71 | 0,00225 | NM_000321    | NARS     |
| 8023481 | 4,93 | 30,38 | 0,00052 | 4,48  | 22,29 | 0,00137 | NM_004539    | ITGA2    |
| 8105267 | 4,92 | 30,33 | 0,00000 | 3,18  | 9,05  | 0,05443 | NM_002203    | NCOA4    |
| 7927536 | 4,92 | 30,29 | 0,00019 | 4,43  | 21,51 | 0,00035 | NM_005437    | COPS4    |
| 8096098 | 4,90 | 29,88 | 0,00149 | 5,02  | 32,39 | 0,00011 | NM_016129    | DNAJC15  |
| 7968872 | 4,90 | 29,83 | 0,01580 | -0,90 | -1,86 | 0,12409 | NM_013238    | SLC38A1  |
| 7962516 | 4,90 | 29,76 | 0,00035 | 3,26  | 9,59  | 0,06614 | NM_030674    | AGFG1    |
| 8048847 | 4,89 | 29,73 | 0,00047 | 4,07  | 16,79 | 0,08689 | NM_001135187 | AKT3     |
| 7925531 | 4,89 | 29,71 | 0,00002 | 2,81  | 7,00  | 0,01148 | NM_181690    | STOM     |
| 8163896 | 4,89 | 29,71 | 0,00020 | 3,26  | 9,55  | 0,00019 | NM_004099    | EIF4A1   |
| 8004497 | 4,89 | 29,59 | 0,00052 | 3,96  | 15,59 | 0,00008 | NM_001416    | HSPA9    |
| 8114455 | 4,88 | 29,45 | 0,00075 | 4,67  | 25,54 | 0,00143 | NM_004134    | SLC30A7  |
| 7903369 | 4,88 | 29,43 | 0,00001 | 4,11  | 17,30 | 0,00037 | NM_133496    | COPS2    |
| 7988605 | 4,88 | 29,40 | 0,00083 | 4,73  | 26,46 | 0,00014 | NM_004236    | C7orf42  |
| 8133192 | 4,88 | 29,35 | 0,00002 | 3,62  | 12,31 | 0,01369 | NM_017994    | C9orf102 |
| 8156601 | 4,87 | 29,33 | 0,00055 | 3,61  | 12,19 | 0,04439 | AL133663     | CDC123   |
| 7926207 | 4,87 | 29,31 | 0,00009 | 4,82  | 28,19 | 0,00028 | NM_006023    | ATP6V1C1 |
| 8147724 | 4,87 | 29,22 | 0,00006 | 4,46  | 21,97 | 0,00008 | NM_001695    | NEK7     |
| 7908543 | 4,87 | 29,15 | 0,00098 | 4,48  | 22,32 | 0,00003 | NM_133494    | CSRP1    |
| 7923378 | 4,86 | 29,07 | 0,00074 | 4,74  | 26,72 | 0,00110 | NM_004078    | CSNK2B   |
| 8179298 | 4,86 | 29,00 | 0,00371 | 3,68  | 12,81 | 0,00069 | NM_001320    | COQ10B   |
| 8047217 | 4,85 | 28,94 | 0,00291 | 3,55  | 11,74 | 0,00094 | NM_025147    | NUP88    |
| 8011832 | 4,85 | 28,89 | 0,00001 | 4,15  | 17,75 | 0,00627 | NM_002532    | RPS3     |
| 7942586 | 4,85 | 28,85 | 0,01141 | 2,98  | 7,90  | 0,07938 | NM_001005    | FARS5    |
| 8059319 | 4,85 | 28,82 | 0,00152 | 4,29  | 19,60 | 0,00484 | NM_005687    | ARF4     |
| 8088339 | 4,85 | 28,80 | 0,00001 | 3,30  | 9,82  | 0,01243 | NM_001660    | FOXO3B   |
| 8013307 | 4,85 | 28,74 | 0,00251 | 4,44  | 21,75 | 0,00494 | NR_026718    | ALG8     |
| 7950654 | 4,84 | 28,70 | 0,00055 | 4,94  | 30,63 | 0,00109 | NM_024079    | FBXO32   |
| 8152703 | 4,84 | 28,66 | 0,00036 | 3,41  | 10,66 | 0,00061 | NM_058229    | ---      |
| 8139879 | 4,84 | 28,62 | 0,00496 | 4,04  | 16,46 | 0,00050 | ---          | RPS20    |
| 8150872 | 4,84 | 28,62 | 0,00481 | 2,04  | 4,10  | 0,25910 | NM_001023    | MOSPD1   |
| 8175288 | 4,84 | 28,59 | 0,00019 | 1,60  | 3,03  | 0,09790 | NM_019556    | WASF1    |
| 8128818 | 4,84 | 28,58 | 0,00009 | 3,66  | 12,61 | 0,01497 | NM_003931    | ABI3BP   |
| 8089145 | 4,83 | 28,51 | 0,00005 | -0,11 | -1,08 | 0,71291 | NM_015429    | MGST1    |
| 7954196 | 4,83 | 28,45 | 0,00285 | 2,26  | 4,77  | 0,16060 | NM_145792    | ATP2B1   |

|         |      |       |         |       |       |         |                 |          |
|---------|------|-------|---------|-------|-------|---------|-----------------|----------|
| 7965359 | 4,83 | 28,45 | 0,00030 | 3,39  | 10,48 | 0,02758 | NM_001001323    | EFEMP1   |
| 8052355 | 4,83 | 28,44 | 0,00021 | 3,05  | 8,31  | 0,01018 | NM_004105       | SEC24A   |
| 8108099 | 4,83 | 28,41 | 0,00051 | 3,90  | 14,91 | 0,00082 | NM_021982       | RARB     |
| 8078286 | 4,83 | 28,39 | 0,00051 | -0,96 | -1,94 | 0,00884 | NM_000965       | DKK1     |
| 7927631 | 4,83 | 28,38 | 0,00157 | 4,30  | 19,73 | 0,00035 | NM_012242       | HLA-B    |
| 8179731 | 4,83 | 28,37 | 0,00083 | 5,63  | 49,54 | 0,00000 | BC013187 BAT1   |          |
| 8178476 | 4,82 | 28,18 | 0,00002 | 5,26  | 38,33 | 0,00662 | NM_004640       | GREM1    |
| 7982377 | 4,82 | 28,17 | 0,00027 | -1,48 | -2,78 | 0,00024 | NM_013372       | OSTC     |
| 8096771 | 4,81 | 28,15 | 0,00042 | 4,75  | 26,95 | 0,00005 | NM_021227       | PDIA3P   |
| 7904881 | 4,81 | 28,10 | 0,00014 | 4,31  | 19,90 | 0,00012 | NR_002305       | NMD3     |
| 8083757 | 4,81 | 28,05 | 0,00008 | 4,07  | 16,77 | 0,00021 | NM_015938       | YME111   |
| 7932678 | 4,81 | 27,99 | 0,00081 | 3,86  | 14,54 | 0,00055 | NM_139312       | ERP44    |
| 8162833 | 4,80 | 27,91 | 0,00015 | 3,51  | 11,41 | 0,00082 | NM_015051       | NUCB2    |
| 7938687 | 4,80 | 27,89 | 0,00034 | 2,27  | 4,83  | 0,00022 | NM_005013       | TMSB10   |
| 8043100 | 4,80 | 27,87 | 0,00008 | 3,57  | 11,91 | 0,00138 | NM_021103       | RPL30    |
| 8151935 | 4,79 | 27,75 | 0,00022 | 3,86  | 14,47 | 0,01725 | NM_000989       | DDX5     |
| 8017634 | 4,78 | 27,48 | 0,00001 | 4,87  | 29,32 | 0,00028 | NM_004396       | CAP2A2   |
| 8135625 | 4,78 | 27,48 | 0,00210 | 2,64  | 6,25  | 0,00455 | NM_006136       | ITFG1    |
| 8001211 | 4,78 | 27,42 | 0,00004 | 3,76  | 13,52 | 0,00525 | NM_030790       | ATL3     |
| 7948995 | 4,77 | 27,33 | 0,00060 | 3,55  | 11,71 | 0,01506 | ENST00000398868 | PSMD1    |
| 8049016 | 4,77 | 27,28 | 0,00312 | 3,75  | 13,44 | 0,00083 | NM_002807       | C3orf64  |
| 8088680 | 4,77 | 27,27 | 0,00090 | 3,38  | 10,40 | 0,00000 | NM_173654       | RDH10    |
| 8146921 | 4,77 | 27,24 | 0,00134 | 3,79  | 13,79 | 0,00307 | NM_172037       | RIPK2    |
| 8147206 | 4,77 | 27,20 | 0,00009 | 4,62  | 24,57 | 0,00166 | NM_003821       | EFR3A    |
| 8148333 | 4,76 | 27,14 | 0,00022 | 3,65  | 12,59 | 0,01017 | NM_015137       | SLFN5    |
| 8006531 | 4,76 | 27,13 | 0,00054 | 2,50  | 5,68  | 0,00112 | NM_144975       | IREB2    |
| 7985166 | 4,76 | 27,10 | 0,00038 | 4,09  | 17,09 | 0,00118 | NM_004136       | CETN2    |
| 8175755 | 4,76 | 27,09 | 0,00008 | 2,66  | 6,33  | 0,00658 | NM_004344       | RPL26    |
| 8012469 | 4,76 | 27,07 | 0,00046 | 1,77  | 3,42  | 0,10709 | NM_000987       | EIF4EBP2 |
| 7928119 | 4,76 | 27,00 | 0,00037 | 4,41  | 21,29 | 0,00141 | NM_004096       | ---      |
| 8162531 | 4,75 | 26,91 | 0,04223 | 3,00  | 7,98  | 0,03500 | ---             | PIK3R1   |
| 8105778 | 4,75 | 26,83 | 0,00006 | 2,47  | 5,55  | 0,00057 | NM_181523       | CKS2     |
| 8156290 | 4,74 | 26,81 | 0,00180 | 4,74  | 26,64 | 0,01831 | NM_001827       | PGRMC1   |
| 8169617 | 4,74 | 26,77 | 0,00028 | 4,42  | 21,39 | 0,00041 | NM_006667       | UBA2     |
| 8027650 | 4,74 | 26,75 | 0,00062 | 2,49  | 5,63  | 0,12454 | NM_005499       | TMEM59   |
| 7916372 | 4,74 | 26,74 | 0,00071 | 4,47  | 22,23 | 0,00146 | NM_004872       | ERGIC2   |
| 7962013 | 4,74 | 26,72 | 0,00083 | 3,70  | 13,03 | 0,00249 | NM_016570       | GNG11    |
| 8134257 | 4,74 | 26,65 | 0,00044 | 1,39  | 2,63  | 0,03572 | NM_004126       | BAT1     |
| 8179750 | 4,74 | 26,65 | 0,00010 | 5,43  | 43,08 | 0,00659 | NM_004640       | RARS     |
| 8109802 | 4,73 | 26,60 | 0,00011 | 3,79  | 13,80 | 0,00051 | NM_002887       | SDHC     |
| 8011212 | 4,73 | 26,58 | 0,00122 | 5,25  | 38,05 | 0,00000 | NM_003001       | CPD      |
| 8006123 | 4,73 | 26,48 | 0,00042 | 2,88  | 7,38  | 0,06440 | NM_001304       | TFG      |
| 8081316 | 4,73 | 26,48 | 0,00129 | 3,71  | 13,06 | 0,00316 | NM_006070       | SCFD1    |
| 7973770 | 4,72 | 26,40 | 0,00006 | 3,95  | 15,44 | 0,00081 | NM_016106       | CAP2     |
| 8117054 | 4,72 | 26,39 | 0,00032 | 3,51  | 11,37 | 0,00409 | NM_006366       | COL3A1   |
| 8046922 | 4,72 | 26,30 | 0,00048 | -1,29 | -2,45 | 0,00941 | NM_000090       | EIF3I    |
| 7899737 | 4,71 | 26,26 | 0,00547 | 4,93  | 30,45 | 0,00002 | NM_003757       | PAPSS2   |
| 7928944 | 4,71 | 26,25 | 0,00086 | 2,58  | 5,97  | 0,00067 | NM_004670       | GNB1     |
| 7911619 | 4,71 | 26,23 | 0,01273 | 4,15  | 17,72 | 0,00553 | NM_002074       | FAM114A1 |
| 8094609 | 4,71 | 26,15 | 0,00010 | 2,19  | 4,56  | 0,00393 | NM_138389       | PDLIM1   |
| 7935180 | 4,71 | 26,11 | 0,00002 | 3,84  | 14,36 | 0,00019 | NM_020992       | PSMA1    |
| 7946728 | 4,71 | 26,10 | 0,00109 | 4,70  | 25,96 | 0,00223 | NM_148976       | RPS3A    |
| 7988031 | 4,70 | 25,99 | 0,01081 | 3,64  | 12,44 | 0,00639 | NM_001006       | LYRM2    |
| 7999752 | 4,70 | 25,93 | 0,00390 | 3,92  | 15,15 | 0,00203 | NR_028493       | REEP3    |
| 7927786 | 4,69 | 25,89 | 0,00001 | 3,67  | 12,77 | 0,00037 | NM_001001330    | UBC      |
| 7967563 | 4,69 | 25,88 | 0,00897 | 2,47  | 5,52  | 0,09939 | NM_021009       | RAP1B    |
| 7956937 | 4,69 | 25,87 | 0,00006 | 3,30  | 9,82  | 0,00559 | NM_015646       | MCFD2    |
| 8051998 | 4,69 | 25,87 | 0,00004 | 5,02  | 32,41 | 0,00002 | NM_139279       | ---      |
| 8084715 | 4,69 | 25,82 | 0,00169 | 1,79  | 3,45  | 0,20044 | ---             | NDUF55   |
| 7900228 | 4,68 | 25,70 | 0,00006 | 3,06  | 8,36  | 0,00183 | NM_004552       | OAT      |
| 7936871 | 4,68 | 25,63 | 0,00004 | 3,36  | 10,25 | 0,02237 | NM_000274       | TP53INP1 |
| 8151890 | 4,68 | 25,56 | 0,00013 | 2,45  | 5,48  | 0,00371 | NM_033285       | TUSC3    |
| 8144726 | 4,68 | 25,56 | 0,00014 | 4,36  | 20,48 | 0,00235 | NM_006765       | LRRC58   |
| 8089830 | 4,67 | 25,53 | 0,00006 | 1,99  | 3,98  | 0,03722 | NM_001099678    | COL1A2   |
| 8134263 | 4,67 | 25,52 | 0,00019 | -1,78 | -3,43 | 0,00002 | NM_000089       | HSP90AB1 |
| 8119993 | 4,67 | 25,50 | 0,00430 | 3,89  | 14,78 | 0,02620 | NM_007355       | AHR      |
| 8131614 | 4,67 | 25,48 | 0,00004 | 3,31  | 9,94  | 0,00558 | NM_001621       | PPA1     |
| 7934133 | 4,67 | 25,45 | 0,00419 | 1,41  | 2,65  | 0,09144 | NM_021129       | IRF2     |
| 8103911 | 4,67 | 25,38 | 0,00030 | 2,83  | 7,12  | 0,00057 | NM_002199       | MME      |
| 8083494 | 4,67 | 25,38 | 0,00132 | -0,56 | -1,47 | 0,10085 | NM_007288       | PLOD2    |
| 8091283 | 4,67 | 25,37 | 0,00012 | 4,59  | 24,14 | 0,00007 | NM_182943       | DCTN4    |
| 8115181 | 4,66 | 25,26 | 0,00033 | 4,02  | 16,19 | 0,00130 | NM_001135643    | UBQLN1   |
| 8161988 | 4,65 | 25,18 | 0,00138 | 3,51  | 11,40 | 0,02747 | NM_013438       | PARM1    |

|         |      |       |         |       |       |         |              |           |
|---------|------|-------|---------|-------|-------|---------|--------------|-----------|
| 8095751 | 4,65 | 25,12 | 0,00026 | 1,78  | 3,42  | 0,00006 | NM_015393    | PSMA6     |
| 7973936 | 4,65 | 25,10 | 0,00006 | 4,45  | 21,83 | 0,00563 | NM_002791    | METAP1    |
| 8096556 | 4,65 | 25,09 | 0,00053 | 5,44  | 43,40 | 0,00010 | NM_015143    | ANP32B    |
| 8156750 | 4,65 | 25,07 | 0,00101 | 2,70  | 6,48  | 0,09418 | NM_006401    | CHIC2     |
| 8100382 | 4,65 | 25,07 | 0,00143 | 3,42  | 10,69 | 0,00706 | NM_012110    | TBP       |
| 8123507 | 4,65 | 25,07 | 0,00042 | 4,60  | 24,29 | 0,00014 | NM_003194    | CYBSA     |
| 8023855 | 4,65 | 25,02 | 0,00105 | 4,40  | 21,08 | 0,00037 | NM_148923    | PSMA3     |
| 7974603 | 4,64 | 25,01 | 0,00337 | 5,29  | 38,99 | 0,00022 | NM_002788    | APBB2     |
| 8099982 | 4,64 | 24,94 | 0,00067 | 4,19  | 18,30 | 0,00926 | NM_004307    | TBC1D19   |
| 8094476 | 4,64 | 24,90 | 0,00089 | 2,49  | 5,62  | 0,00386 | NM_018317    | ANKIB1    |
| 8134180 | 4,64 | 24,87 | 0,00012 | 4,36  | 20,59 | 0,00197 | NM_019004    | UBE2K     |
| 8094704 | 4,64 | 24,86 | 0,00016 | 4,96  | 31,09 | 0,00001 | NM_005339    | SRP14     |
| 7987449 | 4,63 | 24,85 | 0,00346 | 1,69  | 3,22  | 0,10685 | NM_003134    | NDUFA6    |
| 8076417 | 4,63 | 24,80 | 0,00003 | 3,50  | 11,33 | 0,00220 | NM_002490    | SUMO2     |
| 8178322 | 4,63 | 24,78 | 0,00141 | 3,72  | 13,17 | 0,00146 | NM_006937    | PTAR1     |
| 8161632 | 4,63 | 24,71 | 0,00078 | 4,25  | 19,00 | 0,00525 | NM_001099666 | DCTN2     |
| 7964466 | 4,63 | 24,69 | 0,00018 | 4,10  | 17,11 | 0,00014 | NM_006400    | CMPK1     |
| 7901299 | 4,62 | 24,61 | 0,00009 | 3,82  | 14,10 | 0,00075 | NM_016308    | ZMPSTE24  |
| 7900413 | 4,62 | 24,60 | 0,00067 | 3,94  | 15,36 | 0,00148 | NM_005857    | CDV3      |
| 8082788 | 4,62 | 24,60 | 0,00029 | 3,57  | 11,91 | 0,05237 | NM_001134422 | APP       |
| 8069644 | 4,62 | 24,56 | 0,00264 | 3,51  | 11,37 | 0,01835 | NM_000484    | PSMC2     |
| 8135250 | 4,62 | 24,51 | 0,00044 | 4,59  | 24,02 | 0,00034 | NM_002803    | SSFA2     |
| 8046726 | 4,61 | 24,39 | 0,00026 | 2,37  | 5,16  | 0,02767 | NM_001130445 | FBXO25    |
| 8049961 | 4,61 | 24,37 | 0,00758 | 5,58  | 47,82 | 0,00003 | NM_183421    | PATL1     |
| 7948399 | 4,61 | 24,37 | 0,00041 | 4,43  | 21,52 | 0,00596 | NM_152716    | ANO6      |
| 7954997 | 4,61 | 24,36 | 0,00007 | 3,73  | 13,25 | 0,00206 | NM_001025356 | GIT2      |
| 7966268 | 4,60 | 24,31 | 0,00050 | 4,15  | 17,71 | 0,00212 | NM_057169    | ATXN10    |
| 8073799 | 4,60 | 24,26 | 0,00035 | 4,74  | 26,75 | 0,00529 | NM_013236    | ATF2      |
| 8056909 | 4,60 | 24,23 | 0,00022 | 3,45  | 10,95 | 0,02554 | NM_001880    | CEP170    |
| 7925525 | 4,60 | 24,22 | 0,00286 | 3,95  | 15,42 | 0,01536 | NM_014812    | YTHDF3    |
| 8146637 | 4,59 | 24,16 | 0,00001 | 3,22  | 9,29  | 0,00844 | NM_152758    | EPRS      |
| 7924351 | 4,59 | 24,15 | 0,00094 | 2,63  | 6,19  | 0,05338 | NM_004446    | APOBEC3C  |
| 8073068 | 4,59 | 24,15 | 0,00063 | 4,21  | 18,54 | 0,00043 | NM_014508    | KCNJ2     |
| 8009502 | 4,59 | 24,14 | 0,00463 | -0,60 | -1,51 | 0,03582 | NM_000891    | TCP1      |
| 8130567 | 4,59 | 24,13 | 0,00002 | 5,54  | 46,46 | 0,00035 | NM_030752    | DCTN5     |
| 7994102 | 4,59 | 24,13 | 0,00285 | 5,22  | 37,28 | 0,00017 | NM_032486    | SLC14A1   |
| 8021081 | 4,59 | 24,12 | 0,00619 | -0,99 | -1,98 | 0,00304 | NM_001128588 | LAMP2     |
| 8174779 | 4,59 | 24,12 | 0,00007 | 3,52  | 11,44 | 0,00038 | NM_013995    | AIDA      |
| 7917148 | 4,59 | 24,10 | 0,00043 | 4,06  | 16,69 | 0,00045 | NM_022831    | PAPD4     |
| 8106534 | 4,59 | 24,10 | 0,00025 | 3,45  | 10,96 | 0,00037 | NM_001114394 | SCARB2    |
| 8101158 | 4,59 | 24,08 | 0,00057 | 2,84  | 7,16  | 0,00008 | NM_005506    | DAZAP2    |
| 7955464 | 4,59 | 24,06 | 0,00259 | 5,64  | 49,85 | 0,00006 | NM_014764    | FBN2      |
| 8113800 | 4,58 | 24,00 | 0,00052 | -1,12 | -2,17 | 0,00320 | NM_001999    | FBXO3     |
| 7947434 | 4,58 | 23,98 | 0,00035 | 4,02  | 16,27 | 0,00093 | NM_033406    | SECISBP2L |
| 7988581 | 4,58 | 23,96 | 0,00018 | 4,10  | 17,14 | 0,00006 | NM_014701    | TMEM131   |
| 8054092 | 4,58 | 23,93 | 0,00029 | 3,36  | 10,29 | 0,00259 | NM_015348    | IDE       |
| 7935027 | 4,58 | 23,92 | 0,00032 | 3,08  | 8,48  | 0,01693 | NM_004969    | RCN1      |
| 7939120 | 4,58 | 23,86 | 0,00001 | 2,99  | 7,93  | 0,00309 | NM_002901    | MAPK8     |
| 7927389 | 4,57 | 23,82 | 0,00030 | 3,64  | 12,47 | 0,00326 | NM_002750    | CREB1     |
| 8047839 | 4,57 | 23,82 | 0,00029 | 3,64  | 12,44 | 0,00191 | NM_004379    | LY96      |
| 8146934 | 4,57 | 23,79 | 0,00003 | 0,27  | 1,21  | 0,54193 | NM_015364    | SSR3      |
| 8091648 | 4,57 | 23,79 | 0,00137 | 4,01  | 16,12 | 0,00002 | NM_007107    | AP1G1     |
| 8002592 | 4,57 | 23,77 | 0,00021 | 5,10  | 34,41 | 0,00113 | NM_001030007 | SLC40A1   |
| 8057677 | 4,57 | 23,75 | 0,00018 | -0,12 | -1,09 | 0,37140 | NM_014585    | SPCS2     |
| 7914180 | 4,57 | 23,72 | 0,00005 | 3,22  | 9,33  | 0,00062 | NM_014752    | OGFRL1    |
| 8120602 | 4,57 | 23,70 | 0,00023 | 3,20  | 9,18  | 0,02392 | NM_024576    | F2RL2     |
| 8112731 | 4,56 | 23,61 | 0,00393 | 0,31  | 1,24  | 0,36907 | NM_004101    | S100A10   |
| 7920123 | 4,56 | 23,59 | 0,00005 | 4,02  | 16,27 | 0,00042 | NM_002966    | PITRM1    |
| 7931778 | 4,56 | 23,59 | 0,00208 | 3,95  | 15,45 | 0,00941 | NM_014889    | KLHL5     |
| 8094625 | 4,56 | 23,58 | 0,00013 | 4,74  | 26,81 | 0,00005 | NM_015990    | SMG1      |
| 8000217 | 4,56 | 23,53 | 0,00009 | 2,96  | 7,80  | 0,02061 | NM_015092    | KIF2A     |
| 8105523 | 4,56 | 23,51 | 0,00031 | 3,98  | 15,78 | 0,01305 | NM_004520    | FBLN5     |
| 7980908 | 4,56 | 23,51 | 0,00013 | 2,42  | 5,34  | 0,00025 | NM_006329    | PMS2L1    |
| 8141490 | 4,55 | 23,50 | 0,00195 | 6,00  | 63,87 | 0,00009 | NR_003613    | NFE2L2    |
| 8056977 | 4,55 | 23,48 | 0,00127 | 3,87  | 14,59 | 0,00384 | NM_006164    | STAT3     |
| 8015607 | 4,55 | 23,46 | 0,00270 | 4,08  | 16,94 | 0,00172 | NM_139276    | TMEM167A  |
| 8112967 | 4,55 | 23,43 | 0,00041 | 4,01  | 16,08 | 0,00096 | NM_174909    | COPG      |
| 8082478 | 4,55 | 23,41 | 0,00436 | 4,25  | 19,04 | 0,00235 | NM_016128    | IL13RA2   |
| 8174598 | 4,55 | 23,35 | 0,00086 | -1,13 | -2,19 | 0,01525 | NM_000640    | MT1L      |
| 7995793 | 4,55 | 23,35 | 0,00107 | 4,02  | 16,20 | 0,00040 | NR_001447    | FAM35B2   |
| 7927288 | 4,55 | 23,34 | 0,00413 | 2,79  | 6,90  | 0,00696 | NR_027634    | CNOT1     |
| 8001693 | 4,54 | 23,31 | 0,00046 | 3,81  | 14,06 | 0,01779 | NM_016284    | AFF4      |
| 8114083 | 4,54 | 23,22 | 0,00075 | 2,75  | 6,72  | 0,00528 | NM_014423    | TGFBR2    |

|         |      |       |         |       |       |         |              |             |
|---------|------|-------|---------|-------|-------|---------|--------------|-------------|
| 8078350 | 4,54 | 23,18 | 0,00004 | 4,15  | 17,73 | 0,00018 | NM_001024847 | SCYL2       |
| 7957806 | 4,53 | 23,18 | 0,00130 | 3,28  | 9,69  | 0,04808 | NM_017988    | SAMD9L      |
| 8140971 | 4,53 | 23,13 | 0,00006 | -1,04 | -2,05 | 0,01678 | NM_152703    | ARL6IP1     |
| 7999834 | 4,53 | 23,13 | 0,01139 | 5,29  | 39,02 | 0,00224 | NM_015161    | TNFAIP6     |
| 8045688 | 4,53 | 23,11 | 0,00069 | -0,97 | -1,96 | 0,00771 | NM_007115    | PLA1A       |
| 8081890 | 4,53 | 23,07 | 0,00158 | -0,51 | -1,43 | 0,14185 | NM_015900    | MT1X        |
| 7995838 | 4,53 | 23,06 | 0,02089 | 3,03  | 8,19  | 0,01651 | NM_005952    | PRNP        |
| 8060758 | 4,53 | 23,04 | 0,00082 | 4,46  | 21,99 | 0,00226 | NM_000311    | PGK1        |
| 8168500 | 4,52 | 23,00 | 0,00092 | 3,68  | 12,79 | 0,00160 | NM_000291    | BAT1        |
| 8124926 | 4,52 | 22,96 | 0,00007 | 4,88  | 29,54 | 0,00705 | NM_004640    | CD44        |
| 7939341 | 4,52 | 22,91 | 0,00043 | 3,63  | 12,41 | 0,00131 | NM_000610    | PSD3        |
| 8149555 | 4,52 | 22,91 | 0,00004 | 3,53  | 11,55 | 0,00587 | NM_015310    | LIFR        |
| 8111677 | 4,52 | 22,90 | 0,00003 | 4,14  | 17,67 | 0,00146 | NM_002310    | TM9SF2      |
| 7969796 | 4,52 | 22,90 | 0,00058 | 4,16  | 17,83 | 0,00332 | NM_004800    | GTF3C6      |
| 8121502 | 4,52 | 22,90 | 0,00139 | 4,00  | 15,97 | 0,00107 | NM_138408    | PPAP2A      |
| 8112107 | 4,52 | 22,87 | 0,00081 | 3,89  | 14,79 | 0,00011 | NM_003711    | HAT1        |
| 8046346 | 4,52 | 22,87 | 0,00048 | 4,85  | 28,89 | 0,00014 | NM_003642    | TM7SF3      |
| 7961983 | 4,51 | 22,85 | 0,00094 | 5,40  | 42,32 | 0,00008 | NM_016551    | C3          |
| 8033257 | 4,51 | 22,82 | 0,00155 | 3,15  | 8,88  | 0,00039 | NM_000064    | MORF4L2     |
| 8174253 | 4,51 | 22,81 | 0,00002 | 2,87  | 7,30  | 0,00150 | NM_001142418 | VIM         |
| 7926368 | 4,51 | 22,80 | 0,00032 | 3,04  | 8,23  | 0,00056 | NM_003380    | PTENP1      |
| 8160718 | 4,51 | 22,76 | 0,00004 | 1,75  | 3,36  | 0,06676 | NR_023917    | RAB11A      |
| 7984289 | 4,50 | 22,70 | 0,00010 | 3,12  | 8,68  | 0,00463 | NM_004663    | ATP6V1G1    |
| 8157454 | 4,50 | 22,66 | 0,00061 | 3,13  | 8,73  | 0,00103 | NM_004888    | ATF6        |
| 7906819 | 4,50 | 22,63 | 0,00006 | 3,93  | 15,25 | 0,00010 | NM_007348    | PRPS1       |
| 8169240 | 4,50 | 22,62 | 0,00146 | 4,22  | 18,62 | 0,00021 | NM_002764    | ZBTB38      |
| 8083090 | 4,50 | 22,61 | 0,00014 | 3,56  | 11,79 | 0,06133 | NM_001080412 | CTSB        |
| 8149330 | 4,49 | 22,53 | 0,00127 | 4,27  | 19,27 | 0,00137 | NM_147780    | USP10       |
| 7997633 | 4,49 | 22,51 | 0,00209 | 4,71  | 26,13 | 0,00142 | NM_005153    | GORASP2     |
| 8046306 | 4,49 | 22,50 | 0,00024 | 2,72  | 6,61  | 0,01825 | NM_015530    | TMEM123     |
| 7951207 | 4,49 | 22,48 | 0,00032 | 3,12  | 8,71  | 0,00226 | NM_052932    | CXCL12      |
| 7933194 | 4,49 | 22,48 | 0,00200 | -0,86 | -1,81 | 0,01923 | NM_000609    | PAPSS1      |
| 8102214 | 4,49 | 22,47 | 0,00130 | 3,45  | 10,91 | 0,00004 | NM_005443    | EIF3L       |
| 8072946 | 4,49 | 22,44 | 0,00044 | 3,73  | 13,24 | 0,00806 | NM_016091    | PDIA3       |
| 7983274 | 4,49 | 22,44 | 0,00004 | 3,95  | 15,47 | 0,00004 | NM_005313    | TOR1AIP2    |
| 7922637 | 4,49 | 22,43 | 0,00045 | 3,83  | 14,18 | 0,00046 | NM_145034    | HNRNPC      |
| 8047059 | 4,49 | 22,42 | 0,00005 | 2,74  | 6,68  | 0,00005 | NM_031314    | NQO1        |
| 8002303 | 4,48 | 22,36 | 0,00066 | 3,92  | 15,15 | 0,00835 | NM_000903    | U2AF1       |
| 8070655 | 4,48 | 22,34 | 0,00079 | 3,80  | 13,94 | 0,00527 | NM_001025204 | RPL14       |
| 7956743 | 4,48 | 22,30 | 0,00546 | 3,12  | 8,69  | 0,00001 | NM_001034996 | DENND4A     |
| 7989849 | 4,48 | 22,24 | 0,00069 | 3,48  | 11,19 | 0,00110 | NM_001144823 | CAPN2       |
| 7909967 | 4,47 | 22,23 | 0,00204 | 3,84  | 14,33 | 0,00016 | NM_001748    | PDCD1LG2    |
| 8154245 | 4,47 | 22,21 | 0,00143 | -1,08 | -2,11 | 0,01037 | NM_025239    | DYM         |
| 8023228 | 4,47 | 22,21 | 0,00226 | 3,65  | 12,57 | 0,00071 | NM_017653    | RBMS2       |
| 7956261 | 4,47 | 22,21 | 0,00030 | 2,49  | 5,60  | 0,06281 | NM_002898    | TIMM23      |
| 7927519 | 4,47 | 22,19 | 0,00026 | 2,93  | 7,62  | 0,00002 | NM_006327    | CCNI        |
| 8101212 | 4,47 | 22,18 | 0,00116 | 4,56  | 23,57 | 0,00010 | NM_006835    | ITGAV       |
| 8046861 | 4,47 | 22,17 | 0,00087 | 3,90  | 14,91 | 0,00004 | NM_002210    | ADAM12      |
| 7936968 | 4,47 | 22,15 | 0,00122 | -0,62 | -1,54 | 0,07221 | NM_003474    | RPS3A       |
| 8097782 | 4,47 | 22,14 | 0,00412 | 3,82  | 14,14 | 0,00181 | NM_001006    | CDH6        |
| 8104663 | 4,47 | 22,14 | 0,00070 | -2,07 | -4,19 | 0,00047 | NM_004932    | GOLGA5      |
| 7976307 | 4,47 | 22,12 | 0,00025 | 3,50  | 11,28 | 0,00247 | NM_005113    | COL12A1     |
| 8127563 | 4,47 | 22,11 | 0,00054 | 1,55  | 2,92  | 0,00719 | NM_004370    | TTC17       |
| 7939434 | 4,47 | 22,09 | 0,00018 | 4,28  | 19,38 | 0,00400 | NM_018259    | PGM3        |
| 8127841 | 4,46 | 22,08 | 0,00242 | 3,16  | 8,93  | 0,00020 | NM_015599    | ZSWIM6      |
| 8105506 | 4,46 | 22,07 | 0,00046 | 3,53  | 11,56 | 0,01444 | NM_020928    | SNORD116-17 |
| 7981982 | 4,46 | 22,00 | 0,00024 | -1,18 | -2,27 | 0,56422 | NR_003332    | SNORD116-17 |
| 7981986 | 4,46 | 22,00 | 0,00024 | -1,18 | -2,27 | 0,56422 | NR_003332    | ILF2        |
| 7920317 | 4,46 | 21,96 | 0,00084 | 3,80  | 13,93 | 0,00516 | NM_004515    | GRAMD3      |
| 8107673 | 4,46 | 21,95 | 0,00031 | 3,68  | 12,84 | 0,00045 | NM_023927    | THOC7       |
| 8088526 | 4,45 | 21,92 | 0,00001 | 2,13  | 4,37  | 0,00318 | NM_025075    | XPO6        |
| 8000482 | 4,45 | 21,88 | 0,00012 | 5,25  | 38,09 | 0,00077 | NM_015171    | MRPL35      |
| 8043278 | 4,45 | 21,87 | 0,00510 | 3,66  | 12,65 | 0,00058 | NM_016622    | ATP13A3     |
| 8092849 | 4,45 | 21,85 | 0,00032 | 4,93  | 30,48 | 0,00019 | NM_024524    | WAC         |
| 7926851 | 4,45 | 21,84 | 0,00019 | 2,48  | 5,58  | 0,04078 | NR_024557    | CTNNB1      |
| 8079021 | 4,44 | 21,76 | 0,00088 | 3,66  | 12,61 | 0,01667 | NM_001904    | ---         |
| 7917530 | 4,44 | 21,68 | 0,00024 | 0,34  | 1,26  | 0,63700 | ---          | NCRNA00152  |
| 8043363 | 4,44 | 21,63 | 0,00158 | 4,28  | 19,46 | 0,00367 | NR_024204    | ARHGEF12    |
| 7944560 | 4,43 | 21,59 | 0,00094 | 4,29  | 19,53 | 0,00878 | NM_015313    | TMEM167B    |
| 7903586 | 4,43 | 21,58 | 0,00046 | 3,75  | 13,43 | 0,00098 | NM_020141    | TMEM167B    |
| 8039905 | 4,43 | 21,58 | 0,00046 | 3,75  | 13,43 | 0,00098 | NM_020141    | HAUS1       |
| 8021101 | 4,43 | 21,55 | 0,00006 | 2,21  | 4,63  | 0,06985 | NR_026978    | POLR2J4     |
| 8139264 | 4,43 | 21,55 | 0,00030 | 3,26  | 9,58  | 0,00818 | NR_003655    | PHC3        |



|         |      |       |         |       |       |         |              |          |
|---------|------|-------|---------|-------|-------|---------|--------------|----------|
| 8092035 | 4,43 | 21,54 | 0,00045 | 3,30  | 9,82  | 0,03948 | NM_024947    | IAH1     |
| 8040163 | 4,42 | 21,47 | 0,00115 | 4,74  | 26,79 | 0,00028 | NM_001039613 | LARP4    |
| 7955361 | 4,42 | 21,46 | 0,00233 | 3,36  | 10,24 | 0,00768 | NM_052879    | ZNF43    |
| 8035813 | 4,42 | 21,42 | 0,00009 | 0,41  | 1,33  | 0,14378 | NM_003423    | RAB5B    |
| 7956088 | 4,42 | 21,41 | 0,00007 | 3,87  | 14,63 | 0,00058 | NM_002868    | FAF2     |
| 8110169 | 4,42 | 21,38 | 0,00037 | 4,39  | 21,01 | 0,00217 | NM_014613    | UBXN7    |
| 8093112 | 4,42 | 21,38 | 0,00027 | 3,97  | 15,69 | 0,00377 | NM_015562    | BMPR2    |
| 8047538 | 4,41 | 21,33 | 0,00333 | 3,07  | 8,38  | 0,01173 | NM_001204    | DCTD     |
| 8103859 | 4,41 | 21,27 | 0,00017 | 4,51  | 22,78 | 0,00008 | NM_001012732 | MBNL2    |
| 7969677 | 4,41 | 21,24 | 0,00006 | 2,26  | 4,79  | 0,00200 | NM_144778    | ATF7IP   |
| 7954104 | 4,41 | 21,24 | 0,00017 | 2,02  | 4,05  | 0,17558 | NM_018179    | MOSPD2   |
| 8166140 | 4,41 | 21,19 | 0,00040 | 3,39  | 10,46 | 0,00522 | NM_152581    | TMED2    |
| 7959597 | 4,40 | 21,18 | 0,00016 | 2,42  | 5,35  | 0,04798 | NM_006815    | NUFIP2   |
| 8013908 | 4,40 | 21,13 | 0,00009 | 3,38  | 10,42 | 0,02871 | NM_020772    | RAB8B    |
| 7984112 | 4,40 | 21,08 | 0,00113 | 2,17  | 4,50  | 0,00090 | NM_016530    | TIMM23   |
| 7933582 | 4,40 | 21,05 | 0,00013 | 3,37  | 10,37 | 0,00069 | NM_006327    | TMED9    |
| 8110392 | 4,40 | 21,05 | 0,00338 | 3,02  | 8,12  | 0,00053 | NM_017510    | ATP1A1   |
| 7904254 | 4,39 | 21,02 | 0,00044 | 3,30  | 9,88  | 0,01911 | NM_000701    | PLP2     |
| 8167449 | 4,39 | 21,01 | 0,00056 | 4,09  | 17,03 | 0,00003 | NM_002668    | OCIA1    |
| 8094974 | 4,39 | 20,98 | 0,00023 | 3,52  | 11,48 | 0,01308 | NM_017830    | B4GALT5  |
| 8066939 | 4,39 | 20,96 | 0,00343 | 4,37  | 20,62 | 0,00003 | NM_004776    | VTA1     |
| 8122348 | 4,39 | 20,94 | 0,00117 | 3,76  | 13,54 | 0,00092 | NM_016485    | HADHB    |
| 8040639 | 4,38 | 20,83 | 0,00088 | 4,38  | 20,80 | 0,00001 | NM_000183    | SNAPIN   |
| 7905598 | 4,38 | 20,83 | 0,00023 | 4,10  | 17,19 | 0,00300 | NM_012437    | LAMC1    |
| 7908041 | 4,38 | 20,79 | 0,00003 | 3,15  | 8,86  | 0,00223 | NM_002293    | CBLL1    |
| 8135458 | 4,37 | 20,70 | 0,00014 | 3,01  | 8,07  | 0,00207 | NM_024814    | ---      |
| 8099631 | 4,37 | 20,69 | 0,00005 | 3,37  | 10,31 | 0,00045 | ---          | MPV17    |
| 8051066 | 4,37 | 20,65 | 0,00334 | 4,89  | 29,67 | 0,00000 | NM_002437    | MFSD1    |
| 8083656 | 4,37 | 20,64 | 0,00618 | 4,15  | 17,69 | 0,00001 | NM_022736    | STX12    |
| 7899361 | 4,36 | 20,60 | 0,00018 | 3,40  | 10,53 | 0,00012 | NM_177424    | TTC37    |
| 8113157 | 4,36 | 20,58 | 0,00063 | 2,92  | 7,57  | 0,00125 | NM_014639    | FAR2     |
| 7954631 | 4,36 | 20,58 | 0,00320 | -0,66 | -1,58 | 0,00391 | NM_018099    | RHOT1    |
| 8006345 | 4,36 | 20,57 | 0,00007 | 3,79  | 13,84 | 0,00758 | NM_001033568 | IFT20    |
| 8013581 | 4,36 | 20,53 | 0,00146 | 3,28  | 9,70  | 0,00170 | NM_174887    | CAPRIN1  |
| 7939242 | 4,35 | 20,45 | 0,00058 | 3,64  | 12,49 | 0,00031 | NM_005898    | GJA1     |
| 8121749 | 4,35 | 20,42 | 0,00079 | 1,00  | 2,00  | 0,03523 | NM_000165    | COP22    |
| 8016390 | 4,35 | 20,38 | 0,00027 | 0,68  | 1,60  | 0,18244 | NM_016429    | MFGE8    |
| 7991234 | 4,35 | 20,34 | 0,00102 | 3,28  | 9,69  | 0,00928 | NM_005928    | PSMB6    |
| 8003953 | 4,35 | 20,34 | 0,00280 | 4,51  | 22,75 | 0,00023 | NM_002798    | DSCR3    |
| 8070269 | 4,34 | 20,31 | 0,00157 | 3,97  | 15,71 | 0,00002 | NM_006052    | LRRC17   |
| 8135218 | 4,34 | 20,25 | 0,00850 | -0,96 | -1,94 | 0,02853 | NM_005824    | SMNDC1   |
| 7936307 | 4,34 | 20,25 | 0,00002 | 3,39  | 10,47 | 0,00360 | NM_005871    | TNRC6A   |
| 7994187 | 4,34 | 20,25 | 0,00011 | 3,72  | 13,17 | 0,00001 | NM_014494    | SBDS     |
| 8139891 | 4,34 | 20,24 | 0,00092 | 3,03  | 8,18  | 0,00554 | NM_016038    | UCHL1    |
| 8094778 | 4,34 | 20,23 | 0,00172 | 4,16  | 17,93 | 0,00074 | NM_004181    | NNT      |
| 8105153 | 4,34 | 20,21 | 0,00151 | 4,90  | 29,78 | 0,00001 | NM_012343    | HLA-A    |
| 8179041 | 4,34 | 20,21 | 0,00249 | 4,15  | 17,80 | 0,00014 | D32129       | EPS15    |
| 7916045 | 4,34 | 20,21 | 0,00139 | 2,69  | 6,46  | 0,00327 | NM_001981    | FYTTD1   |
| 8084986 | 4,34 | 20,18 | 0,00009 | 3,29  | 9,79  | 0,00179 | NM_032288    | CFB      |
| 8178115 | 4,33 | 20,18 | 0,00013 | 1,48  | 2,78  | 0,00589 | NM_001710    | SSR1     |
| 8123767 | 4,33 | 20,17 | 0,00039 | 3,91  | 15,02 | 0,00003 | NM_003144    | DNAJC19  |
| 7974190 | 4,33 | 20,12 | 0,00980 | 3,76  | 13,56 | 0,00028 | NM_145261    | RPLP2    |
| 7937476 | 4,33 | 20,08 | 0,00733 | 3,78  | 13,75 | 0,00012 | NM_001004    | UQCRFS1  |
| 8073192 | 4,33 | 20,07 | 0,00021 | 3,86  | 14,54 | 0,00004 | NM_006003    | CFB      |
| 8118345 | 4,32 | 20,01 | 0,00008 | 1,23  | 2,35  | 0,01699 | NM_001710    | PITPNA   |
| 8011077 | 4,32 | 20,01 | 0,00055 | 3,53  | 11,56 | 0,01146 | NM_006224    | RPL35    |
| 8164100 | 4,32 | 19,99 | 0,00290 | 2,92  | 7,57  | 0,01601 | NM_007209    | XRN2     |
| 8061324 | 4,32 | 19,95 | 0,00001 | 3,65  | 12,54 | 0,00096 | NM_012255    | AP2B1    |
| 8006542 | 4,32 | 19,92 | 0,00000 | 4,25  | 19,08 | 0,00146 | NM_001030006 | NPEPPS   |
| 8014650 | 4,31 | 19,84 | 0,00008 | 3,39  | 10,49 | 0,01253 | NM_006310    | ---      |
| 8103222 | 4,31 | 19,84 | 0,01679 | 3,32  | 10,00 | 0,03240 | ---          | RNFT1    |
| 8017162 | 4,31 | 19,83 | 0,00289 | 4,73  | 26,46 | 0,00032 | NM_016125    | DRAM2    |
| 7918474 | 4,31 | 19,82 | 0,00036 | 4,37  | 20,65 | 0,00016 | NM_178454    | EIF4G2   |
| 7946610 | 4,31 | 19,82 | 0,00068 | 4,27  | 19,26 | 0,00089 | NM_001418    | SAT1     |
| 8166469 | 4,31 | 19,81 | 0,00090 | 4,15  | 17,80 | 0,00543 | NR_027783    | TXNRD1   |
| 7958174 | 4,31 | 19,80 | 0,00575 | 3,52  | 11,50 | 0,02968 | NM_003330    | FAM103A1 |
| 8130765 | 4,31 | 19,77 | 0,00016 | 4,60  | 24,21 | 0,00021 | BC112329     | IL1R1    |
| 8043995 | 4,31 | 19,77 | 0,00005 | 0,90  | 1,86  | 0,08727 | NM_000877    | RRM1     |
| 7937915 | 4,30 | 19,71 | 0,00029 | 3,35  | 10,20 | 0,00670 | NM_001033    | AKIRIN2  |
| 8128034 | 4,30 | 19,67 | 0,00083 | 3,55  | 11,68 | 0,00015 | NM_018064    | ---      |
| 7910385 | 4,30 | 19,67 | 0,02344 | 2,08  | 4,24  | 0,18994 | ---          | PABPC1   |
| 8152079 | 4,30 | 19,66 | 0,01628 | 3,82  | 14,13 | 0,00750 | NM_002568    | MYBL1    |
| 8151101 | 4,29 | 19,60 | 0,00039 | 4,38  | 20,78 | 0,01229 | NM_001080416 | ---      |

|                                                        |      |       |         |       |       |         |                                     |                    |  |
|--------------------------------------------------------|------|-------|---------|-------|-------|---------|-------------------------------------|--------------------|--|
| 8064857                                                | 4,29 | 19,60 | 0,00101 | 2,89  | 7,42  | 0,00480 | ---                                 | MAT2A              |  |
| 8043187                                                | 4,29 | 19,60 | 0,00557 | 3,81  | 13,99 | 0,00172 | NM_005911                           | COPS3              |  |
| 8013094                                                | 4,29 | 19,56 | 0,00061 | 4,42  | 21,47 | 0,00148 | NM_003653                           | UBB                |  |
| 8005166                                                | 4,29 | 19,56 | 0,00403 | 2,75  | 6,74  | 0,02493 | NM_018955                           | STMN2              |  |
| 8147030                                                | 4,29 | 19,55 | 0,00028 | -1,17 | -2,25 | 0,11070 | NM_007029                           | GNPTAB             |  |
| 7965812                                                | 4,29 | 19,51 | 0,00012 | 3,38  | 10,43 | 0,00470 | NM_024312                           | EIF2S3             |  |
| 8166493                                                | 4,28 | 19,49 | 0,00004 | 3,47  | 11,11 | 0,00545 | NM_001415                           | DNAJC10            |  |
| 8046759                                                | 4,28 | 19,48 | 0,00142 | 4,64  | 24,86 | 0,00010 | NM_018981                           | UGP2               |  |
| 8042270                                                | 4,28 | 19,47 | 0,00017 | 3,14  | 8,81  | 0,00136 | NM_001001521                        | SLC7A11            |  |
| 8102800                                                | 4,28 | 19,42 | 0,00047 | 4,42  | 21,34 | 0,00027 | NM_014331                           | DPM1               |  |
| 8067017                                                | 4,28 | 19,42 | 0,00038 | 4,92  | 30,21 | 0,00029 | NM_003859                           | CAMK2D             |  |
| 8102415                                                | 4,28 | 19,37 | 0,00267 | 3,26  | 9,55  | 0,00068 | NM_001221                           | MRPS11             |  |
| 7985757                                                | 4,27 | 19,36 | 0,00448 | 4,10  | 17,18 | 0,00195 | NM_022839                           | NXF1               |  |
| 7948839                                                | 4,27 | 19,34 | 0,00099 | 2,56  | 5,88  | 0,00060 | NM_006362                           | FOS                |  |
| 7975779                                                | 4,27 | 19,30 | 0,00012 | 2,07  | 4,20  | 0,00803 | NM_005252                           | SULF2              |  |
| 8066822                                                | 4,27 | 19,29 | 0,00005 | -1,05 | -2,07 | 0,03626 | NM_018837                           | EIF4A3             |  |
| 8019046                                                | 4,27 | 19,28 | 0,00083 | 3,67  | 12,69 | 0,00013 | NM_014740                           | POLR3C             |  |
| 7919226                                                | 4,27 | 19,28 | 0,00049 | 4,83  | 28,49 | 0,00009 | NM_006468                           | DICER1             |  |
| 7981111                                                | 4,27 | 19,28 | 0,00013 | 4,23  | 18,80 | 0,00066 | NM_177438                           | CHI3L1             |  |
| 7923547                                                | 4,27 | 19,28 | 0,00074 | -1,11 | -2,16 | 0,02452 | NM_001276                           | ORMDL2             |  |
| 7956031                                                | 4,27 | 19,24 | 0,00021 | 5,47  | 44,26 | 0,00023 | NM_014182                           | C12orf4            |  |
| 7960411                                                | 4,27 | 19,24 | 0,00026 | 2,51  | 5,69  | 0,00533 | NM_020374                           | LGALS1             |  |
| 8072876                                                | 4,26 | 19,22 | 0,00537 | 3,17  | 9,03  | 0,02485 | NM_002305                           | PLEKHA1            |  |
| 7931081                                                | 4,26 | 19,18 | 0,00137 | 4,67  | 25,41 | 0,00086 | NM_021622                           | ATG3               |  |
| 8089527                                                | 4,26 | 19,16 | 0,00048 | 3,85  | 14,40 | 0,00149 | NM_022488                           | LUZP6              |  |
| 8143132                                                | 4,26 | 19,16 | 0,00467 | 4,76  | 27,04 | 0,00013 | NM_001128619                        | C14orf2            |  |
| 7981481                                                | 4,26 | 19,16 | 0,00052 | 5,28  | 38,92 | 0,00012 | NM_004894                           | PXK                |  |
| 8080781                                                | 4,26 | 19,14 | 0,00164 | 3,24  | 9,46  | 0,00012 | NM_017771                           | RNF38              |  |
| 8161192                                                | 4,26 | 19,12 | 0,00033 | 3,91  | 15,00 | 0,00643 | NM_194328                           | COL14A1            |  |
| 8148070                                                | 4,26 | 19,10 | 0,00022 | 0,90  | 1,86  | 0,00271 | NM_021110                           | HERPUD1            |  |
| 7995895                                                | 4,26 | 19,10 | 0,00062 | 3,01  | 8,07  | 0,00957 | NM_014685                           | MAN2A1             |  |
| 8107234                                                | 4,26 | 19,09 | 0,00001 | 3,05  | 8,27  | 0,00483 | NM_002372                           | MBNL1              |  |
| 8083429                                                | 4,25 | 19,06 | 0,00006 | 2,76  | 6,77  | 0,02022 | NM_021038                           | MYOF               |  |
| 7935058                                                | 4,25 | 19,04 | 0,00047 | 3,16  | 8,96  | 0,03490 | NM_013451                           | SLC17A5            |  |
| 8127549                                                | 4,25 | 19,03 | 0,00089 | 3,92  | 15,09 | 0,00038 | NM_012434                           | UGDH               |  |
| 8099897                                                | 4,25 | 19,03 | 0,00269 | 3,70  | 12,97 | 0,03265 | NM_003359                           | YWHAB              |  |
| 8062880                                                | 4,25 | 19,01 | 0,00130 | 4,72  | 26,44 | 0,00401 | NM_003404                           | ARIH1              |  |
| 7984641                                                | 4,25 | 19,01 | 0,00017 | 3,86  | 14,51 | 0,00416 | NM_005744                           | CHCHD3             |  |
| 8143028                                                | 4,25 | 19,01 | 0,00001 | 3,50  | 11,33 | 0,00148 | NM_017812                           | RPS27              |  |
| 8079019                                                | 4,25 | 18,99 | 0,01096 | 2,78  | 6,85  | 0,00225 | NM_001030                           | C19orf2            |  |
| 8027416                                                | 4,25 | 18,99 | 0,00002 | 3,61  | 12,22 | 0,01555 | NM_003796                           | ADH5               |  |
| 8101844                                                | 4,24 | 18,92 | 0,00168 | 2,72  | 6,58  | 0,07774 | NM_000671                           | ATP5EP2 // ATP5EP2 |  |
| // ATP5EP2 // ATP5EP2 // ATP5EP2 // ATP5EP2 // ATP5EP2 |      |       |         |       |       |         |                                     |                    |  |
| 7968270                                                | 4,24 | 18,91 | 0,00369 | 2,49  | 5,62  | 0,01940 | NR_002162 // NR_002162 // NR_002162 |                    |  |
| // NR_002162 // NR_002162 // NR_002162 // NR_002162    |      |       |         |       |       |         |                                     |                    |  |
| 7917885                                                | 4,24 | 18,90 | 0,00209 | 2,43  | 5,39  | 0,01241 | NM_001839                           | CLIC4              |  |
| 7898988                                                | 4,24 | 18,88 | 0,00077 | 2,64  | 6,24  | 0,00257 | NM_013943                           | P4HB               |  |
| 8019762                                                | 4,24 | 18,88 | 0,00261 | 3,73  | 13,25 | 0,00012 | NM_000918                           | EIF1               |  |
| 8007141                                                | 4,24 | 18,87 | 0,01356 | 2,20  | 4,60  | 0,11421 | NM_005801                           | ZNF292             |  |
| 8120992                                                | 4,22 | 18,69 | 0,00065 | 3,24  | 9,46  | 0,00303 | NM_015021                           | NAE1               |  |
| 8001876                                                | 4,22 | 18,67 | 0,00128 | 4,73  | 26,58 | 0,00132 | NM_001018159                        | ATXN7L1            |  |
| 8142100                                                | 4,22 | 18,66 | 0,00054 | 2,52  | 5,72  | 0,00305 | NM_020725                           | SENP1              |  |
| 7962760                                                | 4,22 | 18,60 | 0,00576 | 4,34  | 20,27 | 0,01644 | NM_014554                           | PRKAR2B            |  |
| 8135378                                                | 4,22 | 18,59 | 0,00277 | 1,00  | 2,00  | 0,07569 | NM_002736                           | MAPK1IP1L          |  |
| 7974455                                                | 4,21 | 18,57 | 0,00327 | 3,84  | 14,34 | 0,00128 | NM_144578                           | PIGU               |  |
| 8065762                                                | 4,21 | 18,57 | 0,00011 | 4,79  | 27,67 | 0,00011 | NM_080476                           | WDR26              |  |
| 7924582                                                | 4,21 | 18,57 | 0,00072 | 4,87  | 29,27 | 0,00040 | NM_025160                           | MED14              |  |
| 8172119                                                | 4,21 | 18,53 | 0,00052 | 4,31  | 19,88 | 0,00024 | NM_004229                           | P4HB               |  |
| 8019250                                                | 4,21 | 18,52 | 0,00084 | 3,78  | 13,69 | 0,00068 | NM_000918                           | LTA4H              |  |
| 7965627                                                | 4,21 | 18,51 | 0,00029 | 3,81  | 13,99 | 0,00637 | NM_000895                           | ENTPD7             |  |
| 7929750                                                | 4,21 | 18,47 | 0,00047 | 2,47  | 5,55  | 0,00540 | NM_020354                           | TMEM209            |  |
| 8142912                                                | 4,21 | 18,47 | 0,00047 | 3,64  | 12,50 | 0,01399 | NM_032842                           | NID2               |  |
| 7979133                                                | 4,20 | 18,44 | 0,00247 | 0,19  | 1,14  | 0,40438 | NM_007361                           | PEA15              |  |
| 7906564                                                | 4,20 | 18,44 | 0,00014 | 3,58  | 12,00 | 0,01041 | NM_003768                           | XRN1               |  |
| 8091141                                                | 4,20 | 18,41 | 0,00066 | 3,18  | 9,04  | 0,00639 | NM_019001                           | HMGCS1             |  |
| 8111941                                                | 4,20 | 18,39 | 0,00029 | 4,69  | 25,88 | 0,00002 | NM_001098272                        | STAM               |  |
| 7926385                                                | 4,20 | 18,39 | 0,00186 | 4,04  | 16,42 | 0,00007 | NM_003473                           | AMZ2               |  |
| 8009432                                                | 4,20 | 18,36 | 0,00098 | 3,25  | 9,53  | 0,00433 | NM_016627                           | RBM9               |  |
| 8075673                                                | 4,20 | 18,33 | 0,00267 | 3,93  | 15,21 | 0,00002 | NM_001082578                        | CAPZB              |  |
| 7913169                                                | 4,19 | 18,31 | 0,00218 | 2,69  | 6,47  | 0,00090 | NM_004930                           | TNPO3              |  |
| 8142852                                                | 4,19 | 18,28 | 0,00218 | 4,32  | 19,94 | 0,00000 | NM_012470                           | UBE2Q1             |  |
| 7920515                                                | 4,19 | 18,27 | 0,00332 | 5,48  | 44,78 | 0,00040 | NM_017582                           | SERPING1           |  |
| 7940028                                                | 4,19 | 18,26 | 0,00109 | 1,44  | 2,71  | 0,09416 | NM_000062                           | FAM103A1           |  |

|         |      |       |         |       |       |         |                 |           |
|---------|------|-------|---------|-------|-------|---------|-----------------|-----------|
| 7985488 | 4,19 | 18,23 | 0,00023 | 4,33  | 20,13 | 0,00051 | BC112329 EIF4A2 |           |
| 8084694 | 4,19 | 18,21 | 0,00417 | 4,90  | 29,93 | 0,00509 | NM_001967       | RBPM5     |
| 8145669 | 4,18 | 18,17 | 0,00126 | 1,74  | 3,34  | 0,00702 | NM_001008711    | GABARAPL2 |
| 7997272 | 4,18 | 18,10 | 0,00127 | 4,74  | 26,67 | 0,00005 | NM_007285       | PSMA4     |
| 7985202 | 4,18 | 18,07 | 0,00237 | 4,71  | 26,17 | 0,00005 | NM_002789       | ANKRD13A  |
| 7958600 | 4,17 | 18,06 | 0,00113 | 3,25  | 9,54  | 0,02313 | NM_033121       | ---       |
| 8118667 | 4,17 | 18,05 | 0,00294 | 3,25  | 9,52  | 0,01473 | ---             | C14orf135 |
| 7974771 | 4,17 | 18,01 | 0,00003 | 4,25  | 18,97 | 0,00652 | NM_022495       | CDC26     |
| 8163481 | 4,17 | 17,99 | 0,00140 | 3,01  | 8,06  | 0,00092 | NM_139286       | ITGB8     |
| 8131666 | 4,17 | 17,97 | 0,00167 | 0,36  | 1,29  | 0,51638 | NM_002214       | BAG2      |
| 8120402 | 4,17 | 17,94 | 0,00451 | 3,38  | 10,45 | 0,00554 | NM_004282       | ABHD5     |
| 8079153 | 4,16 | 17,91 | 0,00008 | 3,01  | 8,08  | 0,00026 | NM_016006       | ATOX1     |
| 8115346 | 4,16 | 17,91 | 0,00115 | 3,61  | 12,19 | 0,01111 | NM_004045       | ARF3      |
| 7962904 | 4,16 | 17,87 | 0,00044 | 4,28  | 19,41 | 0,00009 | NM_001659       | IFITM2    |
| 7937330 | 4,16 | 17,86 | 0,00049 | 2,42  | 5,36  | 0,00841 | NM_006435       | RANBP9    |
| 8123989 | 4,16 | 17,85 | 0,00076 | 3,68  | 12,83 | 0,00031 | NM_005493       | PRRX1     |
| 7907222 | 4,16 | 17,85 | 0,00714 | -1,78 | -3,43 | 0,00100 | NM_006902       | KIAA2026  |
| 8160011 | 4,16 | 17,83 | 0,00051 | 3,25  | 9,53  | 0,00043 | NM_001017969    | EEA1      |
| 7965436 | 4,16 | 17,83 | 0,00017 | 1,71  | 3,28  | 0,00410 | NM_003566       | PARK7     |
| 7897404 | 4,16 | 17,82 | 0,00069 | 3,77  | 13,64 | 0,00125 | NM_007262       | RPL41     |
| 7965467 | 4,15 | 17,80 | 0,06662 | 2,54  | 5,82  | 0,05601 | NM_021104       | RPL41     |
| 7982129 | 4,15 | 17,80 | 0,06662 | 2,54  | 5,82  | 0,05601 | NM_021104       | CFL2      |
| 7978586 | 4,15 | 17,80 | 0,00042 | 3,44  | 10,88 | 0,00031 | NM_021914       | TRIM33    |
| 7918725 | 4,15 | 17,79 | 0,00064 | 3,24  | 9,47  | 0,00623 | NM_015906       | SPATS2L   |
| 8047272 | 4,15 | 17,76 | 0,00228 | 3,02  | 8,11  | 0,00050 | NM_015535       | EXOSC10   |
| 7912385 | 4,15 | 17,74 | 0,00026 | 2,66  | 6,34  | 0,00129 | NM_001001998    | SEC23B    |
| 8061186 | 4,15 | 17,73 | 0,00060 | 3,44  | 10,82 | 0,00253 | NM_006363       | RPL10A    |
| 8118974 | 4,15 | 17,72 | 0,00393 | 4,41  | 21,28 | 0,00104 | NM_007104       | SLC39A6   |
| 8022927 | 4,15 | 17,72 | 0,00061 | 3,65  | 12,57 | 0,00675 | NM_012319       | ITGA5     |
| 7963786 | 4,15 | 17,71 | 0,00062 | 3,39  | 10,49 | 0,00053 | NM_002205       | C11orf51  |
| 7950128 | 4,14 | 17,68 | 0,00319 | 2,88  | 7,35  | 0,01109 | NM_014042       | QRICH1    |
| 8087271 | 4,14 | 17,67 | 0,00123 | 3,54  | 11,60 | 0,00686 | NM_017730       | KARS      |
| 8002919 | 4,14 | 17,67 | 0,00039 | 3,54  | 11,61 | 0,00024 | NM_001130089    | 06. Mrz   |
| 8104463 | 4,14 | 17,63 | 0,00188 | 4,49  | 22,40 | 0,00600 | NM_005885       | ARV1      |
| 7910494 | 4,14 | 17,62 | 0,00022 | 4,17  | 17,99 | 0,00013 | NM_022786       | GPNMB     |
| 8131844 | 4,14 | 17,62 | 0,00051 | -0,85 | -1,81 | 0,04590 | NM_001005340    | ENY2      |
| 8147883 | 4,14 | 17,58 | 0,00008 | 4,33  | 20,10 | 0,00108 | NM_020189       | CAND1     |
| 7956910 | 4,14 | 17,58 | 0,00081 | 3,63  | 12,36 | 0,01158 | NM_018448       | CUL3      |
| 8059393 | 4,13 | 17,55 | 0,00093 | 2,67  | 6,37  | 0,05879 | NM_003590       | USP14     |
| 8019807 | 4,13 | 17,55 | 0,00031 | 3,05  | 8,31  | 0,02715 | NM_005151       | C6orf125  |
| 8125775 | 4,13 | 17,53 | 0,00069 | 4,04  | 16,48 | 0,00221 | AY568085 DDHD1  |           |
| 7979223 | 4,13 | 17,51 | 0,00048 | 3,67  | 12,74 | 0,00017 | NM_001160148    | ATP2A2    |
| 7958644 | 4,13 | 17,51 | 0,00016 | 3,85  | 14,44 | 0,02184 | NM_170665       | PDGFRA    |
| 8095080 | 4,13 | 17,51 | 0,00019 | -1,10 | -2,15 | 0,02417 | NM_006206       | C6orf62   |
| 8124273 | 4,13 | 17,51 | 0,00049 | 4,36  | 20,47 | 0,00153 | NM_030939       | SPA17     |
| 7944869 | 4,13 | 17,50 | 0,00126 | 2,72  | 6,58  | 0,00793 | NM_017425       | PTPLB     |
| 8090091 | 4,13 | 17,49 | 0,00128 | 3,85  | 14,43 | 0,01741 | NM_198402       | CHMP2A    |
| 8039796 | 4,13 | 17,47 | 0,00375 | 4,14  | 17,67 | 0,00011 | NM_014453       | SLC35D2   |
| 8162586 | 4,13 | 17,46 | 0,00065 | 3,96  | 15,57 | 0,00014 | NM_007001       | AK2       |
| 7916590 | 4,12 | 17,45 | 0,00119 | 4,07  | 16,81 | 0,00224 | NM_001625       | HSD17B11  |
| 8101648 | 4,12 | 17,43 | 0,00457 | 4,81  | 28,10 | 0,00037 | NM_016245       | PCBP2     |
| 7955817 | 4,12 | 17,38 | 0,00156 | 4,29  | 19,57 | 0,00192 | NM_005016       | S100A11   |
| 7920128 | 4,12 | 17,35 | 0,06438 | 3,58  | 11,94 | 0,02611 | NM_005620       | PARVA     |
| 7938528 | 4,12 | 17,34 | 0,00440 | 2,07  | 4,20  | 0,00150 | NM_018222       | SAMD9     |
| 8140967 | 4,11 | 17,32 | 0,00078 | 0,15  | 1,11  | 0,68809 | NM_017654       | CNIH      |
| 7979250 | 4,11 | 17,30 | 0,00038 | 4,34  | 20,24 | 0,00008 | NM_005776       | CRBN      |
| 8085081 | 4,11 | 17,30 | 0,00081 | 2,38  | 5,21  | 0,00291 | NM_016302       | XRCC5     |
| 8048146 | 4,11 | 17,29 | 0,00003 | 3,57  | 11,90 | 0,00103 | NM_021141       | TRAPPC4   |
| 7944375 | 4,11 | 17,29 | 0,00383 | 4,77  | 27,37 | 0,00002 | NM_016146       | ---       |
| 8111210 | 4,11 | 17,23 | 0,06733 | 2,65  | 6,28  | 0,00098 | ---             | LARS      |
| 8114861 | 4,11 | 17,23 | 0,00014 | 3,84  | 14,34 | 0,00655 | NM_020117       | TM9SF3    |
| 7935320 | 4,10 | 17,20 | 0,00113 | 3,69  | 12,89 | 0,01480 | NM_020123       | GTF2H5    |
| 8123038 | 4,10 | 17,20 | 0,00044 | 2,21  | 4,64  | 0,00814 | NM_207118       | VAMP3     |
| 7897370 | 4,10 | 17,18 | 0,00218 | 3,85  | 14,44 | 0,00010 | NM_004781       | ATP6V1B2  |
| 8144931 | 4,10 | 17,17 | 0,00159 | 4,01  | 16,07 | 0,00036 | NM_001693       | TUBG1     |
| 8007302 | 4,10 | 17,16 | 0,00597 | 4,94  | 30,77 | 0,00126 | NM_001070       | IFITM1    |
| 7937335 | 4,10 | 17,15 | 0,00042 | 1,93  | 3,80  | 0,00972 | NM_003641       | KLHL28    |
| 7978760 | 4,10 | 17,13 | 0,00148 | 2,20  | 4,58  | 0,02616 | NM_017658       | GBAS      |
| 8132929 | 4,10 | 17,12 | 0,00630 | 4,64  | 24,98 | 0,00110 | NM_001483       | CKS1B     |
| 8112327 | 4,09 | 17,06 | 0,00007 | 2,48  | 5,59  | 0,09908 | NM_001826       | IPMK      |
| 7933723 | 4,09 | 17,02 | 0,00024 | 3,06  | 8,33  | 0,00947 | NM_152230       | REXO2     |
| 7944011 | 4,09 | 17,00 | 0,00221 | 2,69  | 6,44  | 0,00023 | NM_015523       | CTSA      |
| 8063078 | 4,08 | 16,94 | 0,00329 | 3,34  | 10,13 | 0,00000 | NM_001127695    | RPL28     |

|         |      |       |         |       |        |         |                        |                |
|---------|------|-------|---------|-------|--------|---------|------------------------|----------------|
| 8031483 | 4,08 | 16,93 | 0,00448 | 2,91  | 7,52   | 0,00082 | NM_001136134           | C20orf30       |
| 8064833 | 4,08 | 16,88 | 0,00293 | 3,71  | 13,08  | 0,00001 | NM_001009924           | NSF            |
| 8007885 | 4,08 | 16,87 | 0,00016 | 4,49  | 22,42  | 0,00307 | NM_006178              | PAMR1          |
| 7947512 | 4,08 | 16,86 | 0,00561 | -1,21 | -2,32  | 0,00075 | NM_015430              | SLC2A3         |
| 7960865 | 4,08 | 16,86 | 0,00013 | 3,07  | 8,42   | 0,05699 | NM_006931              | STXBP1         |
| 8158059 | 4,08 | 16,86 | 0,00125 | 4,80  | 27,82  | 0,00098 | NM_003165              | MTHFD2         |
| 8042830 | 4,08 | 16,86 | 0,00149 | 3,65  | 12,58  | 0,00092 | NR_027405              | DCBLD2         |
| 8089082 | 4,08 | 16,86 | 0,00139 | 3,47  | 11,05  | 0,02541 | NM_080927              | PRRC1          |
| 8107750 | 4,07 | 16,85 | 0,00039 | 2,96  | 7,77   | 0,00376 | NM_130809              | RNF115         |
| 7904830 | 4,07 | 16,83 | 0,00117 | 4,59  | 24,02  | 0,00157 | NM_014455              | HEXB           |
| 8106252 | 4,07 | 16,82 | 0,00112 | 2,97  | 7,83   | 0,00982 | NM_000521              | TMEM106B       |
| 8131539 | 4,07 | 16,80 | 0,00245 | 2,69  | 6,47   | 0,00319 | NM_018374              | MRPL51         |
| 7960553 | 4,07 | 16,79 | 0,00032 | 4,57  | 23,80  | 0,00127 | NM_016497              | PDS5A          |
| 8099926 | 4,07 | 16,76 | 0,00014 | 3,36  | 10,26  | 0,02217 | NM_001100399           | ZDHHC13        |
| 7938816 | 4,06 | 16,73 | 0,00091 | 4,14  | 17,61  | 0,00118 | NM_019028              | SNAI2          |
| 8150698 | 4,06 | 16,73 | 0,00018 | 2,93  | 7,64   | 0,00301 | NM_003068              | PAFAH1B1       |
| 8003758 | 4,06 | 16,71 | 0,00021 | 4,01  | 16,09  | 0,00031 | NM_000430              | FZD6           |
| 8147766 | 4,06 | 16,70 | 0,00140 | 3,57  | 11,84  | 0,03238 | NM_003506              | ANKRD12        |
| 8020068 | 4,06 | 16,69 | 0,00008 | 1,84  | 3,58   | 0,01125 | NM_015208              | ENPP1          |
| 8122099 | 4,06 | 16,66 | 0,00023 | 3,46  | 11,00  | 0,00047 | NM_006208              | FBXO30         |
| 8130032 | 4,05 | 16,62 | 0,00093 | 2,71  | 6,54   | 0,02369 | NM_032145              | TMEM14C        |
| 8116859 | 4,05 | 16,62 | 0,02273 | 6,91  | 120,48 | 0,00001 | NM_001165258           | TMEM184C       |
| 8097704 | 4,05 | 16,60 | 0,00303 | 4,90  | 29,85  | 0,00000 | NM_018241              | DUSP11         |
| 8053046 | 4,05 | 16,59 | 0,00234 | 3,11  | 8,61   | 0,06026 | NM_003584              | CWC15          |
| 7951068 | 4,05 | 16,53 | 0,00026 | 2,56  | 5,92   | 0,00467 | NM_016403              | ERCC3          |
| 8054978 | 4,05 | 16,52 | 0,00029 | 3,98  | 15,77  | 0,00145 | NM_000122              | TCF12          |
| 7983843 | 4,04 | 16,50 | 0,00160 | 3,14  | 8,84   | 0,00544 | NM_207036              | RQCD1          |
| 8048340 | 4,04 | 16,48 | 0,00007 | 2,82  | 7,05   | 0,00189 | NM_005444              | DNAJC13        |
| 8082688 | 4,04 | 16,48 | 0,00009 | 3,25  | 9,53   | 0,00255 | NM_015268              | SRP72          |
| 8095230 | 4,04 | 16,48 | 0,00166 | 4,27  | 19,28  | 0,00522 | NM_006947              | EPS8           |
| 7961546 | 4,04 | 16,46 | 0,00033 | 3,25  | 9,50   | 0,00078 | NM_004447              | CCNK           |
| 7976648 | 4,04 | 16,46 | 0,00117 | 2,14  | 4,41   | 0,03332 | NM_001099402           | CD151          |
| 7937508 | 4,04 | 16,46 | 0,00061 | 3,94  | 15,35  | 0,00350 | NM_004357              | FGF7           |
| 7983630 | 4,04 | 16,43 | 0,00005 | -1,30 | -2,46  | 0,00151 | NM_002009              | C12orf24       |
| 7958666 | 4,04 | 16,41 | 0,00101 | 4,58  | 23,97  | 0,00062 | NM_013300              | MRPS18A        |
| 8126646 | 4,04 | 16,40 | 0,00391 | 4,94  | 30,63  | 0,00087 | NM_018135              | YWHAZ          |
| 8152096 | 4,04 | 16,40 | 0,00230 | 2,92  | 7,56   | 0,01482 | NM_145690              | ASAH1          |
| 8149534 | 4,04 | 16,39 | 0,00144 | 3,47  | 11,08  | 0,00018 | NM_004315              | RBBP4          |
| 7899813 | 4,03 | 16,38 | 0,00826 | 3,99  | 15,91  | 0,01208 | NM_005610              | UFC1           |
| 7906662 | 4,03 | 16,37 | 0,00143 | 4,36  | 20,59  | 0,00877 | NM_016406              | HAS2           |
| 8152617 | 4,03 | 16,36 | 0,00352 | 3,26  | 9,55   | 0,00003 | NM_005328              | HDLBP          |
| 8060225 | 4,03 | 16,35 | 0,00010 | 2,74  | 6,66   | 0,00004 | NM_203346              | RPL39 // RPL39 |
| 8127526 | 4,03 | 16,34 | 0,00018 | 0,47  | 1,39   | 0,26406 | NM_001000 // NM_001000 | PPIB           |
| 7989619 | 4,03 | 16,34 | 0,00230 | 3,44  | 10,87  | 0,00275 | NM_000942              | PRKD1          |
| 7978407 | 4,03 | 16,33 | 0,00125 | 3,12  | 8,70   | 0,00019 | NM_002742              | GSTP1          |
| 7941936 | 4,03 | 16,32 | 0,00624 | 3,50  | 11,35  | 0,00009 | NM_000852              | EIF3E          |
| 8152323 | 4,03 | 16,29 | 0,00323 | 4,21  | 18,54  | 0,00043 | NM_001568              | 11. Sep        |
| 8095854 | 4,03 | 16,29 | 0,00229 | 3,49  | 11,26  | 0,01004 | NM_018243              | CCDC53         |
| 7965846 | 4,02 | 16,25 | 0,00118 | 2,66  | 6,32   | 0,01601 | NM_016053              | TRAK2          |
| 8058221 | 4,02 | 16,24 | 0,00013 | 2,47  | 5,54   | 0,00012 | NM_015049              | PAM            |
| 8107133 | 4,02 | 16,23 | 0,00103 | 2,90  | 7,49   | 0,00146 | NM_000919              | FDFT1          |
| 8144669 | 4,02 | 16,22 | 0,00322 | 4,19  | 18,20  | 0,00057 | NM_004462              | WWP1           |
| 8147156 | 4,02 | 16,21 | 0,00124 | 3,17  | 8,99   | 0,00213 | NM_007013              | SEL1L3         |
| 8099721 | 4,02 | 16,20 | 0,00033 | 4,53  | 23,04  | 0,00027 | NM_015187              | TIMP2          |
| 8018966 | 4,02 | 16,20 | 0,00073 | 4,01  | 16,14  | 0,00033 | NM_003255              | ARRDC4         |
| 7986350 | 4,02 | 16,19 | 0,01146 | -0,43 | -1,35  | 0,17410 | NM_183376              | SLC39A10       |
| 8047174 | 4,02 | 16,18 | 0,00265 | 3,63  | 12,34  | 0,00050 | NM_001127257           | ALDH1L2        |
| 7965979 | 4,02 | 16,18 | 0,00143 | 2,70  | 6,49   | 0,00052 | NM_001034173           | KIAA0368       |
| 8163275 | 4,02 | 16,18 | 0,00022 | 4,16  | 17,91  | 0,00277 | NM_001080398           | PTPN12         |
| 8133788 | 4,01 | 16,13 | 0,00073 | 3,15  | 8,87   | 0,00045 | NM_002835              | VCAM1          |
| 7903358 | 4,01 | 16,12 | 0,00133 | -1,34 | -2,53  | 0,00454 | NM_001078              | PTK2           |
| 8153223 | 4,01 | 16,11 | 0,00003 | 3,70  | 13,00  | 0,01021 | NM_153831              | PGCP           |
| 8147469 | 4,01 | 16,11 | 0,00140 | 1,43  | 2,69   | 0,00635 | NM_016134              | EIF4E2         |
| 8049180 | 4,01 | 16,10 | 0,00214 | 3,42  | 10,72  | 0,00013 | NM_004846              | RPL24          |
| 8089249 | 4,01 | 16,10 | 0,00206 | 3,84  | 14,31  | 0,00049 | NM_000986              | SNORD116-20    |
| 7981988 | 4,01 | 16,09 | 0,00139 | -1,17 | -2,24  | 0,55311 | NR_003334              | GDF15          |
| 8027002 | 4,01 | 16,09 | 0,00083 | 5,42  | 42,87  | 0,00013 | NM_004864              | PAIP2          |
| 8108424 | 4,01 | 16,09 | 0,00088 | 2,82  | 7,06   | 0,00345 | NM_001033112           | FAM35A         |
| 7928909 | 4,01 | 16,08 | 0,00025 | 2,48  | 5,58   | 0,00760 | NM_019054              | TNPO1          |
| 8106122 | 4,01 | 16,08 | 0,00332 | 2,66  | 6,32   | 0,02965 | NM_002270              | ATP5E          |
| 8067288 | 4,01 | 16,07 | 0,00643 | 1,45  | 2,72   | 0,00388 | NM_001001977           | GUCY1B3        |
| 8097973 | 4,01 | 16,07 | 0,00144 | -0,53 | -1,45  | 0,06996 | NM_000857              | KIAA1033       |
| 7958216 | 4,01 | 16,07 | 0,00149 | 3,61  | 12,17  | 0,00120 | NM_015275              | CDH2           |

|         |      |       |         |       |       |         |              |          |
|---------|------|-------|---------|-------|-------|---------|--------------|----------|
| 8022674 | 4,00 | 16,02 | 0,00083 | -0,78 | -1,72 | 0,07049 | NM_001792    | CD68     |
| 8004510 | 4,00 | 16,00 | 0,00045 | 2,63  | 6,18  | 0,00519 | NM_001251    | SLC35B1  |
| 8016578 | 4,00 | 15,99 | 0,00070 | 5,08  | 33,75 | 0,00000 | NM_005827    | GNA13    |
| 8017711 | 4,00 | 15,98 | 0,00018 | 3,18  | 9,09  | 0,00111 | NM_006572    | CHRM2    |
| 8136448 | 4,00 | 15,98 | 0,00713 | -1,18 | -2,27 | 0,03671 | NM_001006630 | C18orf21 |
| 8020919 | 4,00 | 15,96 | 0,00076 | 4,08  | 16,96 | 0,00150 | NM_031446    | SUB1     |
| 8104738 | 4,00 | 15,95 | 0,00486 | 3,97  | 15,65 | 0,00420 | NM_006713    | PPP1R3C  |
| 7934997 | 3,99 | 15,94 | 0,00550 | 1,03  | 2,04  | 0,02462 | NM_005398    | PAPPA    |
| 8157487 | 3,99 | 15,94 | 0,00064 | -0,01 | -1,01 | 0,95862 | NM_002581    | ZNF644   |
| 7917604 | 3,99 | 15,93 | 0,00158 | 3,31  | 9,92  | 0,01109 | NM_201269    | AKR1B1   |
| 8143054 | 3,99 | 15,92 | 0,01092 | 3,47  | 11,07 | 0,00660 | NM_001628    | MUTED    |
| 8123802 | 3,99 | 15,91 | 0,00056 | 3,70  | 12,98 | 0,00086 | NM_201280    | ZNF486   |
| 8027260 | 3,99 | 15,90 | 0,00159 | 3,31  | 9,92  | 0,00037 | NM_052852    | BAT2L2   |
| 7907310 | 3,99 | 15,89 | 0,00065 | 2,06  | 4,17  | 0,01864 | NM_015172    | USP4     |
| 8087380 | 3,99 | 15,88 | 0,00108 | 4,01  | 16,14 | 0,00074 | NM_003363    | FAM45A   |
| 7930882 | 3,99 | 15,88 | 0,00055 | 4,49  | 22,40 | 0,00005 | NM_207009    | HLA-B    |
| 8178498 | 3,99 | 15,87 | 0,00437 | 4,75  | 26,95 | 0,00005 | NM_005514    | HNRNPH2  |
| 8168852 | 3,99 | 15,87 | 0,00212 | 2,40  | 5,28  | 0,00041 | NM_019597    | PSEN1    |
| 7975545 | 3,99 | 15,85 | 0,00082 | 4,68  | 25,58 | 0,00144 | NM_000021    | USP9X    |
| 8166826 | 3,99 | 15,83 | 0,00021 | 3,10  | 8,56  | 0,01366 | NM_001039590 | ETFA     |
| 7990566 | 3,98 | 15,83 | 0,00147 | 3,54  | 11,63 | 0,00324 | NM_000126    | DSE      |
| 8121588 | 3,98 | 15,83 | 0,00087 | 3,64  | 12,50 | 0,00036 | NM_013352    | C3orf17  |
| 8089584 | 3,98 | 15,82 | 0,00251 | 3,86  | 14,52 | 0,00366 | NM_015412    | SF3B14   |
| 8050695 | 3,98 | 15,82 | 0,00006 | 2,42  | 5,35  | 0,01498 | NM_016047    | GLUD1    |
| 7934852 | 3,98 | 15,80 | 0,00055 | 4,42  | 21,41 | 0,00004 | NM_005271    | ZNF675   |
| 8035847 | 3,98 | 15,80 | 0,00245 | 3,03  | 8,18  | 0,00592 | NM_138330    | PRKCI    |
| 8083854 | 3,98 | 15,78 | 0,00089 | 4,55  | 23,41 | 0,00640 | NM_002740    | SETD5    |
| 8077528 | 3,98 | 15,76 | 0,00148 | 3,06  | 8,34  | 0,02103 | NM_001080517 | RAB11B   |
| 8025414 | 3,98 | 15,74 | 0,00062 | 5,68  | 51,17 | 0,00001 | NM_004218    | SF3B3    |
| 7997099 | 3,98 | 15,74 | 0,00015 | 4,16  | 17,87 | 0,00025 | NM_012426    | PNRC2    |
| 7898910 | 3,98 | 15,74 | 0,00120 | 4,33  | 20,04 | 0,00011 | NM_017761    | PNRC2    |
| 8039933 | 3,98 | 15,74 | 0,00120 | 4,33  | 20,04 | 0,00011 | NM_017761    | LANCL1   |
| 8058614 | 3,98 | 15,73 | 0,00392 | 4,43  | 21,52 | 0,00026 | NM_006055    | PSMD10   |
| 8174379 | 3,97 | 15,71 | 0,00323 | 4,48  | 22,33 | 0,00040 | NM_002814    | RAI14    |
| 8104788 | 3,97 | 15,71 | 0,00066 | 1,79  | 3,45  | 0,04323 | NM_001145525 | HPS3     |
| 8083282 | 3,97 | 15,70 | 0,00128 | 4,47  | 22,12 | 0,00502 | NM_032383    | PSAP     |
| 7934196 | 3,97 | 15,70 | 0,00128 | 3,40  | 10,57 | 0,00092 | NM_002778    | USP25    |
| 8067903 | 3,97 | 15,69 | 0,00051 | 3,28  | 9,68  | 0,01999 | NM_013396    | IQGAP1   |
| 7986010 | 3,97 | 15,69 | 0,00239 | 2,87  | 7,31  | 0,06797 | NM_003870    | RPL23A   |
| 8005943 | 3,97 | 15,68 | 0,02977 | 1,49  | 2,80  | 0,31836 | NM_000984    | GYG1     |
| 8083272 | 3,97 | 15,67 | 0,00015 | 1,76  | 3,38  | 0,05221 | NM_004130    | ALDH1A1  |
| 8161755 | 3,97 | 15,65 | 0,00007 | -1,32 | -2,50 | 0,00565 | NM_000689    | MED13    |
| 8017312 | 3,97 | 15,63 | 0,00032 | 3,25  | 9,52  | 0,06120 | NM_005121    | SLPI     |
| 8066493 | 3,96 | 15,61 | 0,00996 | 3,92  | 15,13 | 0,00084 | NM_003064    | CRIP1    |
| 8041813 | 3,96 | 15,61 | 0,00095 | 3,61  | 12,24 | 0,00040 | NM_014171    | SOD1     |
| 8068168 | 3,96 | 15,60 | 0,00002 | 3,12  | 8,69  | 0,00004 | NM_000454    | SC4MOL   |
| 8098195 | 3,96 | 15,60 | 0,00151 | 4,82  | 28,21 | 0,00001 | NM_006745    | BNIP3L   |
| 8145454 | 3,96 | 15,59 | 0,00100 | 2,16  | 4,48  | 0,05206 | NM_004331    | TMEM111  |
| 8085263 | 3,96 | 15,57 | 0,00023 | 2,22  | 4,66  | 0,00007 | NM_018447    | LAMA4    |
| 8128991 | 3,96 | 15,54 | 0,00040 | -1,17 | -2,25 | 0,00026 | NM_001105206 | IDH1     |
| 8058552 | 3,96 | 15,51 | 0,00699 | 5,40  | 42,31 | 0,00059 | NM_005896    | ARHGAP1  |
| 7947681 | 3,96 | 15,51 | 0,00659 | 2,42  | 5,36  | 0,00005 | NM_004308    | NAP1L1   |
| 7965048 | 3,95 | 15,47 | 0,00225 | 3,64  | 12,46 | 0,00099 | NM_004537    | TMEM66   |
| 8150089 | 3,95 | 15,47 | 0,00080 | 3,85  | 14,41 | 0,00079 | NM_016127    | CLINT1   |
| 8115524 | 3,95 | 15,47 | 0,00154 | 2,87  | 7,33  | 0,00707 | NM_014666    | KRR1     |
| 7965022 | 3,95 | 15,47 | 0,00016 | 3,04  | 8,20  | 0,00134 | NM_007043    | RPS4Y1   |
| 8176375 | 3,95 | 15,45 | 0,00010 | 3,31  | 9,94  | 0,00338 | NM_001008    | ANO10    |
| 8086467 | 3,95 | 15,44 | 0,00172 | 2,54  | 5,80  | 0,00026 | NM_018075    | WDR41    |
| 8112746 | 3,95 | 15,43 | 0,00181 | 4,06  | 16,69 | 0,00001 | NM_018268    | FNDC3A   |
| 7969060 | 3,95 | 15,42 | 0,00046 | 2,48  | 5,57  | 0,02309 | NM_001079673 | ATP6AP2  |
| 8166805 | 3,94 | 15,40 | 0,00075 | 3,19  | 9,13  | 0,00074 | NM_005765    | ATP5C1   |
| 7926084 | 3,94 | 15,39 | 0,00036 | 4,05  | 16,58 | 0,00170 | NM_001001973 | SLC38A9  |
| 8112121 | 3,94 | 15,37 | 0,00211 | 4,51  | 22,82 | 0,00141 | NM_173514    | MSL1     |
| 8007023 | 3,94 | 15,36 | 0,00571 | 3,09  | 8,53  | 0,00663 | NM_001012241 | KDEL2    |
| 7951535 | 3,94 | 15,35 | 0,00190 | 3,75  | 13,47 | 0,00008 | NM_153705    | ARID5B   |
| 7927732 | 3,94 | 15,34 | 0,00055 | 1,18  | 2,27  | 0,01335 | NM_032199    | RAN      |
| 8117888 | 3,94 | 15,34 | 0,00105 | 4,35  | 20,38 | 0,00067 | NM_006325    | STK38L   |
| 7954511 | 3,94 | 15,33 | 0,00027 | 3,00  | 7,98  | 0,00048 | NM_015000    | CUL2     |
| 7933047 | 3,94 | 15,33 | 0,01372 | 3,75  | 13,46 | 0,00459 | NM_003591    | FOXN3    |
| 7980680 | 3,94 | 15,32 | 0,00783 | 2,97  | 7,83  | 0,00715 | NM_001085471 | HLA-B    |
| 8124911 | 3,94 | 15,31 | 0,00565 | 4,83  | 28,50 | 0,00003 | NM_005514    | KLHL24   |
| 8084219 | 3,94 | 15,31 | 0,00021 | 3,28  | 9,71  | 0,00392 | NM_017644    | VPS26A   |
| 7927972 | 3,94 | 15,31 | 0,00013 | 2,87  | 7,31  | 0,00310 | NM_004896    | CTNNA1   |

|         |      |       |         |       |       |         |              |         |
|---------|------|-------|---------|-------|-------|---------|--------------|---------|
| 8108378 | 3,94 | 15,30 | 0,00045 | 3,20  | 9,21  | 0,00093 | NM_001903    | SCRN1   |
| 8138824 | 3,94 | 15,30 | 0,00221 | 4,67  | 25,47 | 0,00041 | NM_014766    | ACSL4   |
| 8174474 | 3,94 | 15,30 | 0,00001 | 2,42  | 5,35  | 0,00024 | NM_022977    | ERBB2IP |
| 8105681 | 3,93 | 15,29 | 0,00028 | 2,74  | 6,69  | 0,07916 | NM_018695    | ORC3L   |
| 8121043 | 3,93 | 15,28 | 0,00022 | 2,69  | 6,46  | 0,00304 | NM_181837    | RPS3A   |
| 8141222 | 3,93 | 15,26 | 0,00106 | 3,66  | 12,66 | 0,00180 | NM_001006    | ARL2BP  |
| 7996012 | 3,93 | 15,24 | 0,00006 | 3,86  | 14,48 | 0,00016 | NM_012106    | HEG1    |
| 8090193 | 3,93 | 15,23 | 0,00466 | 2,09  | 4,26  | 0,01216 | NM_020733    | ARL6IP5 |
| 8080926 | 3,93 | 15,23 | 0,00106 | 3,04  | 8,25  | 0,00105 | NM_006407    | CASK    |
| 8172158 | 3,93 | 15,23 | 0,00038 | 3,72  | 13,17 | 0,00331 | NM_003688    | C5orf13 |
| 8113504 | 3,93 | 15,22 | 0,01154 | 2,85  | 7,20  | 0,00015 | NM_004772    | TCTN3   |
| 7935251 | 3,93 | 15,22 | 0,00150 | 4,43  | 21,57 | 0,00037 | NM_015631    | IPO5    |
| 7969703 | 3,93 | 15,20 | 0,00039 | 3,46  | 11,02 | 0,00957 | NM_002271    | DPF2    |
| 7941243 | 3,92 | 15,19 | 0,00079 | 4,50  | 22,63 | 0,00462 | NM_006268    | MED8    |
| 7915516 | 3,92 | 15,18 | 0,00037 | 2,82  | 7,05  | 0,00010 | NM_201542    | CCNT2   |
| 8045381 | 3,92 | 15,18 | 0,00022 | 2,81  | 7,01  | 0,00871 | NM_058241    | HBP1    |
| 8135392 | 3,92 | 15,17 | 0,00291 | 3,41  | 10,60 | 0,00020 | NM_012257    | ---     |
| 8102787 | 3,92 | 15,17 | 0,00282 | -1,23 | -2,35 | 0,16665 | ---          | SVEP1   |
| 8163202 | 3,92 | 15,17 | 0,00317 | -0,29 | -1,22 | 0,20289 | NM_153366    | RPL7    |
| 8109222 | 3,92 | 15,16 | 0,00251 | 2,74  | 6,69  | 0,00244 | NM_000971    | SAR1B   |
| 8114193 | 3,92 | 15,16 | 0,00099 | 4,29  | 19,55 | 0,00096 | NM_001033503 | FAM57A  |
| 8003611 | 3,92 | 15,15 | 0,00057 | 3,57  | 11,84 | 0,00004 | NM_024792    | TBK1    |
| 7956795 | 3,92 | 15,13 | 0,00317 | 4,00  | 15,98 | 0,00086 | NM_013254    | SNORD41 |
| 8034512 | 3,92 | 15,11 | 0,00422 | -0,64 | -1,56 | 0,74474 | NR_002751    | BMS1    |
| 8071649 | 3,92 | 15,09 | 0,00131 | 2,91  | 7,52  | 0,05984 | BC043345     | 15. Sep |
| 7917455 | 3,91 | 15,07 | 0,01208 | 4,29  | 19,54 | 0,00000 | NM_004261    | ELF1    |
| 7971197 | 3,91 | 15,07 | 0,00172 | 4,20  | 18,36 | 0,00022 | NM_172373    | GPBP1   |
| 8105463 | 3,91 | 15,06 | 0,00105 | 3,86  | 14,51 | 0,00103 | NM_022913    | TRPM7   |
| 7988713 | 3,91 | 15,06 | 0,00009 | 3,92  | 15,17 | 0,00223 | NM_017672    | VPS39   |
| 7987840 | 3,91 | 15,05 | 0,00180 | 3,71  | 13,05 | 0,00003 | NM_015289    | NCKAP1  |
| 8057517 | 3,91 | 15,03 | 0,00043 | 3,36  | 10,28 | 0,03329 | NM_013436    | CASP4   |
| 7951372 | 3,91 | 15,03 | 0,00029 | 1,94  | 3,84  | 0,00166 | NM_033306    | UBE4A   |
| 7944195 | 3,91 | 15,02 | 0,00221 | 3,13  | 8,74  | 0,01114 | NM_004788    | PTP4A2  |
| 7914489 | 3,91 | 15,01 | 0,00010 | 4,26  | 19,22 | 0,00283 | NM_080391    | BNIP3   |
| 7937079 | 3,91 | 15,00 | 0,00098 | 3,82  | 14,16 | 0,00000 | NM_004052    | ATP5J2  |
| 8141295 | 3,91 | 15,00 | 0,00008 | 3,53  | 11,56 | 0,00780 | NM_004889    | CNOT4   |
| 8143088 | 3,90 | 14,96 | 0,00297 | 2,99  | 7,95  | 0,00486 | NM_013316    | RPS27   |
| 7900157 | 3,90 | 14,95 | 0,01482 | 2,73  | 6,64  | 0,00279 | NM_001030    | ACTN1   |
| 7979824 | 3,90 | 14,95 | 0,00515 | 2,92  | 7,59  | 0,00592 | NM_001130004 | TLK1    |
| 8056734 | 3,90 | 14,94 | 0,00623 | 3,44  | 10,86 | 0,00375 | NM_012290    | ERLEC1  |
| 8041967 | 3,90 | 14,93 | 0,00003 | 1,84  | 3,57  | 0,03069 | NM_015701    | RHOQ    |
| 8045289 | 3,90 | 14,92 | 0,00073 | 3,15  | 8,90  | 0,00130 | NM_012249    | SF3B1   |
| 8058024 | 3,90 | 14,92 | 0,00078 | 2,94  | 7,69  | 0,03317 | NM_012433    | CDV3    |
| 8081135 | 3,90 | 14,88 | 0,00017 | 2,02  | 4,05  | 0,09044 | NM_001134422 | C7orf44 |
| 8139244 | 3,89 | 14,88 | 0,01799 | 5,12  | 34,85 | 0,00004 | NM_018224    | GALNT12 |
| 8156770 | 3,89 | 14,86 | 0,00046 | 3,04  | 8,21  | 0,00015 | NM_024642    | UBAP2L  |
| 7905700 | 3,89 | 14,85 | 0,00070 | 3,89  | 14,79 | 0,00088 | NM_014847    | ABHD13  |
| 7969979 | 3,89 | 14,83 | 0,00207 | 3,54  | 11,59 | 0,00588 | NM_032859    | DPY30   |
| 8051387 | 3,89 | 14,83 | 0,00311 | 3,87  | 14,59 | 0,00026 | NM_032574    | HNRNPC  |
| 7977657 | 3,89 | 14,82 | 0,00010 | 3,00  | 7,99  | 0,00002 | NM_031314    | ACTR2   |
| 8042337 | 3,89 | 14,81 | 0,00029 | 3,31  | 9,91  | 0,00175 | NM_001005386 | PDPK1   |
| 7998825 | 3,89 | 14,79 | 0,00191 | 4,72  | 26,42 | 0,00064 | NM_002613    | RAB10   |
| 8040618 | 3,89 | 14,79 | 0,00298 | 4,17  | 18,01 | 0,00245 | NM_016131    | KPNA2   |
| 8009417 | 3,89 | 14,78 | 0,00061 | 4,66  | 25,24 | 0,00035 | NM_002266    | PTPRM   |
| 8019988 | 3,89 | 14,78 | 0,00032 | 4,38  | 20,88 | 0,00231 | NM_001105244 | ASAP1   |
| 8152867 | 3,89 | 14,78 | 0,00060 | 3,54  | 11,66 | 0,00015 | NM_018482    | DNMTIP2 |
| 7917771 | 3,88 | 14,75 | 0,00011 | 3,04  | 8,20  | 0,00338 | NM_014597    | CCDC72  |
| 8079630 | 3,88 | 14,73 | 0,00478 | 4,35  | 20,43 | 0,00002 | NM_015933    | MSL2    |
| 8090893 | 3,88 | 14,71 | 0,01063 | 3,30  | 9,82  | 0,03527 | NM_018133    | ZBTB38  |
| 8083092 | 3,88 | 14,71 | 0,00335 | 3,13  | 8,73  | 0,00117 | NM_001080412 | DCAF6   |
| 7907104 | 3,88 | 14,68 | 0,00069 | 3,17  | 9,02  | 0,00143 | NM_018442    | MKLN1   |
| 8136259 | 3,87 | 14,65 | 0,00053 | 3,46  | 11,00 | 0,00014 | NM_013255    | GLB1    |
| 8086028 | 3,87 | 14,65 | 0,00127 | 4,52  | 22,95 | 0,00000 | NM_000404    | ZMYM2   |
| 7967900 | 3,87 | 14,64 | 0,00005 | 2,05  | 4,13  | 0,19068 | NM_003453    | PSD3    |
| 8149551 | 3,87 | 14,63 | 0,01595 | 3,87  | 14,66 | 0,00061 | NM_015310    | REPS1   |
| 8129901 | 3,87 | 14,58 | 0,00036 | 3,78  | 13,72 | 0,00314 | NM_031922    | AK3L1   |
| 7962183 | 3,87 | 14,57 | 0,00022 | 2,66  | 6,32  | 0,01775 | NM_001005353 | APLP2   |
| 7945182 | 3,86 | 14,57 | 0,00429 | 3,76  | 13,54 | 0,02335 | NM_001642    | IMPAD1  |
| 8150906 | 3,86 | 14,56 | 0,01852 | 4,79  | 27,74 | 0,00388 | NM_017813    | SNAPC3  |
| 8154394 | 3,86 | 14,56 | 0,00069 | 3,35  | 10,22 | 0,01499 | NM_001039697 | SOS1    |
| 8051670 | 3,86 | 14,55 | 0,00056 | 3,26  | 9,58  | 0,00813 | NM_005633    | DRG1    |
| 8072488 | 3,86 | 14,51 | 0,00030 | 3,13  | 8,75  | 0,00274 | NM_004147    | GNG2    |
| 7974341 | 3,86 | 14,49 | 0,00016 | -0,41 | -1,33 | 0,14472 | NM_053064    | NRBP1   |

|         |      |       |         |       |       |         |                        |                |
|---------|------|-------|---------|-------|-------|---------|------------------------|----------------|
| 8040927 | 3,86 | 14,49 | 0,00460 | 4,23  | 18,78 | 0,00003 | NM_013392              | TMED4          |
| 8139411 | 3,86 | 14,48 | 0,00374 | 4,85  | 28,94 | 0,00102 | NM_182547              | MNAT1          |
| 7974799 | 3,86 | 14,48 | 0,00067 | 3,38  | 10,40 | 0,00146 | NM_002431              | COPS6          |
| 8134699 | 3,86 | 14,48 | 0,00329 | 2,60  | 6,06  | 0,00167 | NM_006833              | TMCO1          |
| 7921987 | 3,85 | 14,47 | 0,00533 | 4,82  | 28,27 | 0,00012 | NM_019026              | FBN1           |
| 7988467 | 3,85 | 14,47 | 0,00073 | -0,06 | -1,04 | 0,81852 | NM_000138              | POLR2K         |
| 8147654 | 3,85 | 14,45 | 0,00019 | 2,24  | 4,72  | 0,00082 | NM_005034              | RPL39 // RPL39 |
| 8174710 | 3,85 | 14,45 | 0,00017 | 0,41  | 1,32  | 0,31408 | NM_001000 // NM_001000 | MYLK           |
| 8090098 | 3,85 | 14,44 | 0,00054 | 0,38  | 1,30  | 0,05824 | NM_053025              | GLT8D2         |
| 7965941 | 3,85 | 14,42 | 0,00188 | -0,85 | -1,81 | 0,10937 | NM_031302              | ANXA6          |
| 8115234 | 3,85 | 14,42 | 0,00055 | 2,90  | 7,49  | 0,00228 | NM_001155              | STK38          |
| 8126018 | 3,85 | 14,40 | 0,00024 | 3,77  | 13,63 | 0,00014 | NM_007271              | ANXA2          |
| 7989335 | 3,85 | 14,40 | 0,02711 | 1,89  | 3,71  | 0,06280 | NM_001002858           | FAM198B        |
| 8103415 | 3,85 | 14,37 | 0,00021 | -1,34 | -2,54 | 0,00075 | NM_001128424           | CTDSP2         |
| 7983335 | 3,84 | 14,36 | 0,00006 | 2,19  | 4,56  | 0,02612 | NM_016396              | GLO1           |
| 8126135 | 3,84 | 14,35 | 0,00030 | 2,80  | 6,98  | 0,01628 | NM_006708              | MTF2           |
| 7903032 | 3,84 | 14,32 | 0,00011 | 4,76  | 27,17 | 0,00008 | NM_007358              | COPB1          |
| 7946703 | 3,84 | 14,31 | 0,00185 | 3,22  | 9,33  | 0,00908 | NM_016451              | NSMAF          |
| 8150928 | 3,84 | 14,30 | 0,00033 | 4,50  | 22,63 | 0,00196 | NM_003580              | SNX13          |
| 8138401 | 3,84 | 14,29 | 0,00089 | 3,00  | 8,01  | 0,00900 | NM_015132              | NRD1           |
| 7916077 | 3,84 | 14,28 | 0,00055 | 4,06  | 16,64 | 0,00003 | NM_002525              | FAM105A        |
| 8104570 | 3,84 | 14,27 | 0,00017 | 1,22  | 2,34  | 0,03857 | NM_019018              | KIAA1109       |
| 8097148 | 3,83 | 14,23 | 0,00003 | 3,37  | 10,35 | 0,01791 | NM_015312              | ARFGEF1        |
| 8151149 | 3,83 | 14,22 | 0,00021 | 3,56  | 11,80 | 0,01005 | NM_006421              | PSMB7          |
| 8164067 | 3,83 | 14,19 | 0,00478 | 3,53  | 11,58 | 0,00008 | NM_002799              | RC3H2          |
| 8163972 | 3,83 | 14,19 | 0,00345 | 3,91  | 14,99 | 0,00420 | NM_001100588           | C7orf36        |
| 8132399 | 3,83 | 14,19 | 0,00325 | 3,46  | 10,98 | 0,00482 | NM_020192              | ZEB1           |
| 7926916 | 3,82 | 14,17 | 0,00266 | 2,43  | 5,40  | 0,00147 | NM_030751              | RPL5           |
| 8076511 | 3,82 | 14,16 | 0,00400 | 3,03  | 8,15  | 0,05556 | NM_000969              | VPS45          |
| 7905099 | 3,82 | 14,15 | 0,00012 | 4,89  | 29,73 | 0,00001 | NM_007259              | FABP3          |
| 7914342 | 3,82 | 14,13 | 0,00074 | -1,18 | -2,27 | 0,01328 | NM_004102              | B4GALT1        |
| 8160637 | 3,82 | 14,13 | 0,00311 | 4,35  | 20,34 | 0,00226 | NM_001497              | PIGK           |
| 7917088 | 3,82 | 14,12 | 0,00294 | 3,65  | 12,54 | 0,00068 | NM_005482              | PIK3C2A        |
| 7946815 | 3,82 | 14,11 | 0,00093 | 3,55  | 11,72 | 0,00941 | NM_002645              | GCSH           |
| 8114778 | 3,82 | 14,11 | 0,01016 | 2,81  | 7,00  | 0,00422 | NM_004483              | RPL31          |
| 8043932 | 3,82 | 14,11 | 0,00002 | 3,02  | 8,13  | 0,00310 | NM_001099693           | VCP            |
| 8160914 | 3,82 | 14,10 | 0,00114 | 3,98  | 15,75 | 0,00211 | NM_007126              | CNBP           |
| 8090546 | 3,82 | 14,10 | 0,00015 | 4,20  | 18,43 | 0,00033 | NM_001127192           | ANKRD28        |
| 8085628 | 3,82 | 14,08 | 0,00028 | 4,06  | 16,66 | 0,00010 | NM_015199              | PLK2           |
| 8112202 | 3,81 | 14,05 | 0,00018 | 3,74  | 13,33 | 0,00006 | NM_006622              | COG5           |
| 8142143 | 3,81 | 14,03 | 0,00015 | 3,96  | 15,57 | 0,00055 | NM_006348              | LAMB1          |
| 8142194 | 3,81 | 14,03 | 0,00079 | 2,77  | 6,80  | 0,00948 | NM_002291              | SCD            |
| 7929816 | 3,81 | 14,02 | 0,00011 | 3,13  | 8,73  | 0,02537 | NM_005063              | HNRNPK         |
| 8162047 | 3,81 | 14,01 | 0,00549 | 4,39  | 21,00 | 0,00133 | NM_002140              | NONO           |
| 8168280 | 3,81 | 13,99 | 0,02414 | 3,07  | 8,41  | 0,00035 | NM_001145408           | GFPT1          |
| 8052762 | 3,81 | 13,98 | 0,00019 | 3,48  | 11,18 | 0,00690 | NM_002056              | ---            |
| 8132589 | 3,80 | 13,97 | 0,00941 | 0,77  | 1,71  | 0,14534 | ---                    | SRPX           |
| 8172043 | 3,80 | 13,97 | 0,00037 | 1,99  | 3,96  | 0,00733 | NM_006307              | FAM127A        |
| 8170009 | 3,80 | 13,97 | 0,00863 | 1,83  | 3,55  | 0,00234 | NM_001078171           | RPS4X          |
| 8173513 | 3,80 | 13,95 | 0,00004 | 3,63  | 12,35 | 0,00003 | NM_001007              | MSN            |
| 8167965 | 3,80 | 13,95 | 0,00269 | 4,78  | 27,41 | 0,00000 | NM_002444              | UROS           |
| 7936937 | 3,80 | 13,92 | 0,00029 | 2,56  | 5,90  | 0,00021 | NM_000375              | CSNK2A2        |
| 8001666 | 3,80 | 13,92 | 0,00291 | 3,86  | 14,54 | 0,01066 | NM_001896              | C11orf75       |
| 7951004 | 3,80 | 13,90 | 0,01226 | 3,89  | 14,78 | 0,00007 | NM_020179              | HSPA4L         |
| 8097335 | 3,80 | 13,90 | 0,00155 | 3,03  | 8,15  | 0,00060 | NM_014278              | TMEM147        |
| 8027876 | 3,80 | 13,90 | 0,00481 | 5,08  | 33,88 | 0,00191 | NM_032635              | ZNF207         |
| 8006377 | 3,80 | 13,88 | 0,00079 | 3,71  | 13,06 | 0,00039 | NM_001098507           | TMEM60         |
| 8140500 | 3,80 | 13,88 | 0,00000 | 3,06  | 8,31  | 0,00016 | NM_032936              | PIK3C3         |
| 8021015 | 3,79 | 13,88 | 0,00061 | 2,10  | 4,30  | 0,02930 | NM_002647              | CDC16          |
| 7970347 | 3,79 | 13,88 | 0,00026 | 2,99  | 7,97  | 0,00034 | NM_001078645           | NOMO3          |
| 7993371 | 3,79 | 13,88 | 0,00073 | 3,54  | 11,60 | 0,00649 | NM_001004067           | NOMO3          |
| 7993511 | 3,79 | 13,88 | 0,00073 | 3,54  | 11,60 | 0,00649 | NM_001004067           | NOMO3          |
| 7999791 | 3,79 | 13,88 | 0,00073 | 3,54  | 11,60 | 0,00649 | NM_001004067           | EIF3C          |
| 7994415 | 3,79 | 13,87 | 0,00099 | 3,63  | 12,36 | 0,00045 | NM_001037808           | EIF3C          |
| 8000507 | 3,79 | 13,87 | 0,00099 | 3,63  | 12,36 | 0,00045 | NM_001037808           | HEXA           |
| 7990211 | 3,79 | 13,87 | 0,00543 | 3,28  | 9,73  | 0,00002 | NM_000520              | SPIN1          |
| 8156263 | 3,79 | 13,86 | 0,00897 | 4,70  | 25,95 | 0,00027 | NM_006717              | BRAF           |
| 8143417 | 3,79 | 13,86 | 0,00896 | 2,82  | 7,06  | 0,00127 | NM_004333              | HEBP2          |
| 8122317 | 3,79 | 13,86 | 0,00007 | 2,20  | 4,60  | 0,00218 | NM_014320              | H3F3B          |
| 8018439 | 3,79 | 13,85 | 0,00047 | 3,89  | 14,83 | 0,00003 | NM_005324              | SNX6           |
| 7978570 | 3,79 | 13,84 | 0,00045 | 3,76  | 13,55 | 0,03107 | NM_021249              | OXSR1          |
| 8078738 | 3,79 | 13,83 | 0,00009 | 2,92  | 7,57  | 0,00001 | NM_005109              | NRAS           |
| 7918813 | 3,79 | 13,83 | 0,00031 | 2,71  | 6,55  | 0,00334 | NM_002524              | RPL9           |

|         |      |       |         |       |       |         |              |            |
|---------|------|-------|---------|-------|-------|---------|--------------|------------|
| 7990949 | 3,79 | 13,82 | 0,00071 | 3,18  | 9,09  | 0,00123 | NM_000661    | TRIP12     |
| 8059596 | 3,79 | 13,82 | 0,00229 | 3,86  | 14,51 | 0,00118 | NM_004238    | ID2        |
| 8040103 | 3,79 | 13,81 | 0,00111 | 0,22  | 1,17  | 0,52758 | NM_002166    | RBMS3      |
| 8078330 | 3,79 | 13,81 | 0,00013 | 2,84  | 7,17  | 0,00008 | NM_001003793 | SEMA3C     |
| 8140534 | 3,79 | 13,80 | 0,00202 | 3,78  | 13,78 | 0,00021 | NM_006379    | SURF4      |
| 8164883 | 3,79 | 13,79 | 0,00076 | 3,91  | 15,00 | 0,00005 | NM_033161    | YIPF5      |
| 8114829 | 3,78 | 13,78 | 0,00139 | 2,48  | 5,57  | 0,00148 | NM_001024947 | PCMT1      |
| 8122705 | 3,78 | 13,77 | 0,00445 | 4,89  | 29,60 | 0,00006 | NM_005389    | C1orf27    |
| 7908330 | 3,78 | 13,77 | 0,00086 | 2,30  | 4,94  | 0,01684 | NM_017847    | STARD3NL   |
| 8132376 | 3,78 | 13,74 | 0,00006 | 3,05  | 8,31  | 0,00134 | NM_032016    | ZMYM4      |
| 7899957 | 3,78 | 13,74 | 0,00036 | 3,39  | 10,50 | 0,01278 | NM_005095    | PTMA       |
| 8061136 | 3,78 | 13,73 | 0,01131 | 2,39  | 5,22  | 0,04645 | NM_002823    | CKS1B      |
| 7926896 | 3,78 | 13,73 | 0,00005 | 2,20  | 4,59  | 0,10129 | NM_001826    | TWSG1      |
| 8020090 | 3,78 | 13,72 | 0,00299 | 3,57  | 11,90 | 0,00032 | NM_020648    | TMBIM4     |
| 7964745 | 3,78 | 13,71 | 0,00041 | 3,56  | 11,76 | 0,00188 | NM_016056    | SNORD113-4 |
| 7976812 | 3,78 | 13,71 | 0,02377 | -0,78 | -1,71 | 0,00103 | NR_003232    | GMPR       |
| 8117034 | 3,78 | 13,70 | 0,00193 | 4,04  | 16,43 | 0,00006 | NM_006877    | ELL2       |
| 7921344 | 3,78 | 13,70 | 0,00005 | 2,02  | 4,05  | 0,04009 | NM_012081    | MTHFD2     |
| 8084064 | 3,78 | 13,70 | 0,00710 | 3,78  | 13,74 | 0,00001 | NM_006636    | C1orf58    |
| 7909931 | 3,78 | 13,70 | 0,01194 | 4,57  | 23,67 | 0,00023 | NM_144695    | RPS6KA3    |
| 8171762 | 3,78 | 13,69 | 0,00012 | 3,84  | 14,30 | 0,00020 | NM_004586    | EXOC6B     |
| 8052956 | 3,77 | 13,68 | 0,01007 | 3,37  | 10,35 | 0,00819 | NM_015189    | RAPH1      |
| 8058390 | 3,77 | 13,68 | 0,00295 | 3,37  | 10,34 | 0,00012 | NM_213589    | PPP3CA     |
| 8101971 | 3,77 | 13,68 | 0,00192 | 3,60  | 12,12 | 0,00014 | NM_000944    | BTG1       |
| 7965423 | 3,77 | 13,67 | 0,00136 | 3,60  | 12,09 | 0,00176 | NM_001731    | RPL15      |
| 8078270 | 3,77 | 13,67 | 0,00163 | 3,38  | 10,43 | 0,00681 | NM_002948    | ZNF525     |
| 8030980 | 3,77 | 13,67 | 0,03717 | 1,89  | 3,72  | 0,12771 | NR_003699    | C7orf58    |
| 8135734 | 3,77 | 13,64 | 0,00052 | -0,50 | -1,41 | 0,00544 | NM_024913    | BICC1      |
| 7927681 | 3,77 | 13,63 | 0,00233 | 2,39  | 5,26  | 0,00161 | NM_001080512 | ERGIC3     |
| 8062174 | 3,77 | 13,62 | 0,00029 | 3,76  | 13,58 | 0,00038 | NM_198398    | C1R        |
| 7960744 | 3,77 | 13,62 | 0,00379 | 1,56  | 2,95  | 0,01061 | NM_001733    | MOBK11B    |
| 8053064 | 3,77 | 13,61 | 0,00524 | 5,26  | 38,21 | 0,00002 | NM_018221    | CTSC       |
| 7950906 | 3,76 | 13,57 | 0,00154 | 2,87  | 7,29  | 0,00018 | NM_001814    | FBLN1      |
| 8073775 | 3,76 | 13,56 | 0,00086 | 0,10  | 1,07  | 0,87878 | NM_006486    | GNAQ       |
| 8161906 | 3,76 | 13,56 | 0,00702 | 3,91  | 15,00 | 0,00019 | NM_002072    | CDR1       |
| 8175531 | 3,76 | 13,56 | 0,00313 | -1,01 | -2,01 | 0,01914 | NM_004065    | NFAT5      |
| 7996954 | 3,76 | 13,56 | 0,00135 | 1,87  | 3,66  | 0,07537 | NM_138714    | MMP1       |
| 7951271 | 3,76 | 13,55 | 0,00271 | -0,18 | -1,14 | 0,50708 | NM_002421    | ATP6V1E1   |
| 8074251 | 3,76 | 13,55 | 0,00031 | 1,20  | 2,30  | 0,17334 | NM_001696    | SLC35A5    |
| 8081667 | 3,76 | 13,55 | 0,00080 | 3,64  | 12,47 | 0,00205 | NM_017945    | KIAA0174   |
| 7997168 | 3,76 | 13,54 | 0,00608 | 5,14  | 35,18 | 0,00019 | NM_014761    | YPEL5      |
| 8041197 | 3,76 | 13,53 | 0,00017 | 3,13  | 8,76  | 0,00338 | NM_001127401 | GHITM      |
| 7928752 | 3,76 | 13,52 | 0,00249 | 3,61  | 12,23 | 0,00081 | NM_014394    | RPS15A     |
| 7999827 | 3,76 | 13,52 | 0,00107 | 3,73  | 13,23 | 0,00035 | NM_001019    | C5orf22    |
| 8104680 | 3,76 | 13,51 | 0,00034 | 4,31  | 19,82 | 0,00026 | NM_018356    | DCUN1D4    |
| 8095009 | 3,76 | 13,51 | 0,00216 | 3,54  | 11,66 | 0,00006 | NM_001040402 | NSA2       |
| 8106271 | 3,75 | 13,50 | 0,00002 | 2,62  | 6,16  | 0,00173 | NM_014886    | TNFSF10    |
| 8092169 | 3,75 | 13,49 | 0,00102 | 4,58  | 23,98 | 0,00054 | NM_003810    | JAK1       |
| 7916747 | 3,75 | 13,47 | 0,00259 | 3,93  | 15,27 | 0,00034 | NM_002227    | RPL7       |
| 8151376 | 3,75 | 13,47 | 0,00258 | 2,24  | 4,71  | 0,00810 | NM_000971    | RPS6       |
| 8160308 | 3,75 | 13,47 | 0,00074 | 1,77  | 3,41  | 0,09005 | NM_001010    | NDUFV2     |
| 8020058 | 3,75 | 13,46 | 0,00061 | 3,29  | 9,79  | 0,00249 | NM_021074    | ATP5L      |
| 7944216 | 3,75 | 13,46 | 0,00117 | 2,89  | 7,40  | 0,00053 | NM_006476    | MFF        |
| 8048835 | 3,75 | 13,45 | 0,00484 | 4,38  | 20,86 | 0,02911 | NM_020194    | CCDC92     |
| 7967486 | 3,75 | 13,44 | 0,00171 | 2,85  | 7,20  | 0,00069 | NM_025140    | IL13RA1    |
| 8169580 | 3,75 | 13,43 | 0,00003 | 2,74  | 6,68  | 0,00027 | NM_001560    | TSG101     |
| 7947015 | 3,75 | 13,42 | 0,00080 | 4,10  | 17,17 | 0,00012 | NM_006292    | RPL9       |
| 8099887 | 3,75 | 13,41 | 0,00094 | 3,14  | 8,83  | 0,00065 | NM_001024921 | DENND4C    |
| 8154531 | 3,75 | 13,41 | 0,00033 | 2,31  | 4,96  | 0,16573 | NM_017925    | ZNF765     |
| 8039010 | 3,75 | 13,41 | 0,00002 | 3,61  | 12,24 | 0,00067 | NM_001040185 | UBLCP1     |
| 8109597 | 3,74 | 13,38 | 0,00234 | 3,90  | 14,94 | 0,00004 | NM_145049    | CNIH4      |
| 7910014 | 3,74 | 13,37 | 0,00481 | 4,80  | 27,87 | 0,00039 | NM_014184    | RNASEK     |
| 8004237 | 3,74 | 13,37 | 0,00312 | 4,19  | 18,21 | 0,00001 | NM_001004333 | TMEM48     |
| 7916316 | 3,74 | 13,36 | 0,00267 | 4,64  | 24,94 | 0,00060 | NM_018087    | CRABP2     |
| 7921099 | 3,74 | 13,36 | 0,00120 | 1,75  | 3,36  | 0,00551 | NM_001878    | RNF146     |
| 8121927 | 3,74 | 13,36 | 0,00004 | 1,74  | 3,34  | 0,02185 | NM_030963    | COX5B      |
| 8043718 | 3,74 | 13,36 | 0,01322 | 5,52  | 45,92 | 0,00029 | NM_001862    | FRMD6      |
| 7974316 | 3,74 | 13,35 | 0,00042 | 1,56  | 2,96  | 0,02589 | NM_001042481 | RPL23A     |
| 8026440 | 3,74 | 13,35 | 0,05879 | 0,87  | 1,83  | 0,52266 | NM_000984    | FCF1       |
| 7975713 | 3,74 | 13,35 | 0,00016 | 2,85  | 7,22  | 0,00114 | NM_015962    | SEC61A1    |
| 8082408 | 3,74 | 13,33 | 0,00043 | 3,92  | 15,14 | 0,00023 | NM_013336    | ATIC       |
| 8048120 | 3,74 | 13,32 | 0,00249 | 3,62  | 12,33 | 0,00455 | NM_004044    | FAM98A     |
| 8051413 | 3,74 | 13,32 | 0,00108 | 3,99  | 15,92 | 0,00002 | NM_015475    | KPNA6      |



|         |      |       |         |      |       |         |              |          |
|---------|------|-------|---------|------|-------|---------|--------------|----------|
| 7899688 | 3,74 | 13,32 | 0,00468 | 5,80 | 55,82 | 0,00009 | NM_012316    | RAB7A    |
| 8090509 | 3,73 | 13,30 | 0,00225 | 1,30 | 2,47  | 0,10603 | NM_004637    | PSMG2    |
| 8020241 | 3,73 | 13,29 | 0,00101 | 4,91 | 30,03 | 0,00039 | NM_020232    | PMPGB    |
| 8135235 | 3,73 | 13,29 | 0,00183 | 4,92 | 30,28 | 0,00005 | NM_004279    | PTP4A1   |
| 8120431 | 3,73 | 13,25 | 0,00020 | 3,15 | 8,87  | 0,02530 | NM_003463    | USMG5    |
| 8168416 | 3,73 | 13,24 | 0,02277 | 4,73 | 26,52 | 0,00068 | NM_032747    | RFX7     |
| 7989132 | 3,73 | 13,22 | 0,00147 | 3,21 | 9,29  | 0,00805 | NM_022841    | ACSL1    |
| 8103951 | 3,72 | 13,19 | 0,00254 | 3,34 | 10,13 | 0,00046 | NM_001995    | RBM39    |
| 8066009 | 3,72 | 13,18 | 0,00655 | 3,74 | 13,37 | 0,00093 | NM_184234    | ARPC1A   |
| 8134581 | 3,72 | 13,18 | 0,00298 | 2,80 | 6,98  | 0,00677 | NM_006409    | GNG5     |
| 8174509 | 3,72 | 13,18 | 0,00020 | 3,66 | 12,63 | 0,00025 | NM_005274    | TMEM9B   |
| 7946439 | 3,72 | 13,18 | 0,00448 | 4,59 | 24,09 | 0,00020 | NM_020644    | C15orf41 |
| 7982535 | 3,72 | 13,15 | 0,00123 | 4,52 | 22,88 | 0,00232 | NM_032499    | FAM127B  |
| 8175302 | 3,71 | 13,11 | 0,00079 | 2,72 | 6,57  | 0,00082 | NM_001078172 | RPL7A    |
| 8022972 | 3,71 | 13,11 | 0,00377 | 1,84 | 3,57  | 0,03457 | NM_000972    | USP44    |
| 7965565 | 3,71 | 13,10 | 0,00440 | 3,33 | 10,02 | 0,00159 | NM_032147    | STAT1    |
| 8057744 | 3,71 | 13,09 | 0,00096 | 2,77 | 6,82  | 0,00243 | NM_007315    | TBC1D22B |
| 8119169 | 3,71 | 13,08 | 0,01057 | 4,31 | 19,79 | 0,00067 | NM_017772    | DLG1     |
| 8093191 | 3,71 | 13,08 | 0,00015 | 2,74 | 6,66  | 0,08590 | NM_001098424 | PBRM1    |
| 8087951 | 3,71 | 13,08 | 0,00205 | 3,05 | 8,30  | 0,00084 | NM_018165    | OBFC2A   |
| 8047161 | 3,71 | 13,05 | 0,00734 | 3,11 | 8,64  | 0,00015 | NM_001031716 | ---      |
| 7916564 | 3,71 | 13,05 | 0,00115 | 1,78 | 3,44  | 0,17544 | --- ESYT2    | ---      |
| 8144184 | 3,71 | 13,05 | 0,00020 | 3,77 | 13,62 | 0,00145 | NM_020728    | RBMS1    |
| 8056206 | 3,71 | 13,04 | 0,00525 | 1,90 | 3,73  | 0,02918 | NM_016836    | ZNF493   |
| 8027304 | 3,70 | 13,04 | 0,00016 | 1,47 | 2,77  | 0,05861 | NM_001076678 | RNF3     |
| 7999608 | 3,70 | 13,03 | 0,00388 | 3,40 | 10,55 | 0,00112 | NM_018427    | RPS3A    |
| 8141050 | 3,70 | 13,02 | 0,00047 | 1,94 | 3,83  | 0,01064 | NM_001006    | ASB3     |
| 8052125 | 3,70 | 13,02 | 0,00380 | 4,29 | 19,52 | 0,00072 | NM_016115    | GUSBP1   |
| 8111455 | 3,70 | 13,02 | 0,00106 | 4,38 | 20,82 | 0,00025 | NR_027026    | CAT      |
| 7939298 | 3,70 | 13,02 | 0,00121 | 3,42 | 10,73 | 0,00056 | NM_001752    | CD2AP    |
| 8120102 | 3,70 | 13,02 | 0,00065 | 3,38 | 10,39 | 0,01350 | NM_012120    | SLC25A36 |
| 8083063 | 3,70 | 13,00 | 0,00368 | 4,97 | 31,36 | 0,00146 | NM_001104647 | FAM38B   |
| 8022295 | 3,70 | 12,99 | 0,01180 | 1,58 | 3,00  | 0,00061 | NM_022068    | NOL7     |
| 8116969 | 3,70 | 12,98 | 0,00048 | 3,27 | 9,65  | 0,00075 | NM_016167    | DERL1    |
| 8152628 | 3,70 | 12,97 | 0,02917 | 5,14 | 35,22 | 0,00001 | NM_024295    | C9orf21  |
| 8162624 | 3,70 | 12,95 | 0,00180 | 2,84 | 7,16  | 0,00247 | NM_153698    | PTPRK    |
| 8129418 | 3,69 | 12,95 | 0,00037 | 2,65 | 6,26  | 0,00224 | NM_001135648 | KPNB1    |
| 8007992 | 3,69 | 12,94 | 0,00482 | 3,73 | 13,28 | 0,01107 | NM_002265    | DPH3     |
| 8085660 | 3,69 | 12,94 | 0,00055 | 2,89 | 7,39  | 0,00024 | NM_206831    | ATP5G1   |
| 8008132 | 3,69 | 12,94 | 0,00648 | 4,23 | 18,83 | 0,00005 | NM_005175    | FAH      |
| 7985268 | 3,69 | 12,92 | 0,00449 | 2,44 | 5,43  | 0,00993 | NM_000137    | SQLE     |
| 8148280 | 3,69 | 12,92 | 0,00168 | 4,07 | 16,76 | 0,00005 | NM_003129    | RAB3GAP2 |
| 7924405 | 3,69 | 12,92 | 0,00034 | 2,30 | 4,92  | 0,00312 | NM_012414    | CD81     |
| 7937802 | 3,69 | 12,91 | 0,01867 | 4,24 | 18,91 | 0,00037 | NM_004356    | FAM126A  |
| 8138553 | 3,69 | 12,91 | 0,00081 | 3,86 | 14,55 | 0,00146 | NM_032581    | NUDT21   |
| 8001496 | 3,69 | 12,90 | 0,02535 | 4,81 | 28,05 | 0,00195 | NM_007006    | RAB13    |
| 7963986 | 3,69 | 12,90 | 0,00030 | 3,48 | 11,13 | 0,00001 | NM_002870    | JUNB     |
| 8026047 | 3,69 | 12,90 | 0,00009 | 2,98 | 7,87  | 0,00017 | NM_002229    | DENND1B  |
| 7923131 | 3,69 | 12,90 | 0,00088 | 3,83 | 14,21 | 0,00399 | NM_001142795 | ZNF253   |
| 8027241 | 3,69 | 12,89 | 0,00009 | 2,98 | 7,90  | 0,00116 | NM_021047    | ZNF480   |
| 8030908 | 3,69 | 12,88 | 0,00068 | 3,07 | 8,41  | 0,00208 | NM_144684    | C19orf53 |
| 8026193 | 3,69 | 12,88 | 0,00080 | 2,10 | 4,27  | 0,03126 | NM_014047    | LLPH     |
| 8048703 | 3,69 | 12,86 | 0,00254 | 3,73 | 13,29 | 0,00014 | NM_032338    | C11orf58 |
| 7978754 | 3,68 | 12,83 | 0,02570 | 3,28 | 9,70  | 0,00097 | NM_014267    | STT3A    |
| 7944991 | 3,68 | 12,82 | 0,00079 | 3,65 | 12,56 | 0,00598 | NM_152713    | CIRH1A   |
| 7996891 | 3,68 | 12,82 | 0,00884 | 5,90 | 59,91 | 0,00007 | NM_032830    | CYB5R3   |
| 8076481 | 3,68 | 12,81 | 0,00077 | 2,75 | 6,74  | 0,00012 | NM_000398    | CSNK2A1  |
| 8064351 | 3,68 | 12,81 | 0,00068 | 3,60 | 12,15 | 0,00133 | NM_177559    | MALAT1   |
| 7941272 | 3,68 | 12,80 | 0,00173 | 1,26 | 2,39  | 0,42317 | NR_002819    | GLG1     |
| 8002729 | 3,68 | 12,79 | 0,00822 | 3,04 | 8,23  | 0,02794 | NM_001145667 | MAP3K1   |
| 8105436 | 3,68 | 12,78 | 0,00955 | 3,03 | 8,15  | 0,01521 | NM_005921    | WDR45L   |
| 8019523 | 3,68 | 12,77 | 0,00053 | 5,38 | 41,60 | 0,00055 | NM_019613    | CPNE3    |
| 8147172 | 3,67 | 12,77 | 0,00117 | 3,55 | 11,72 | 0,00406 | NM_003909    | C5orf51  |
| 8105104 | 3,67 | 12,77 | 0,00448 | 3,89 | 14,82 | 0,00182 | NM_175921    | FAM171B  |
| 8046895 | 3,67 | 12,74 | 0,00799 | 3,27 | 9,64  | 0,00091 | NM_177454    | RMND5A   |
| 8043310 | 3,67 | 12,73 | 0,00273 | 4,41 | 21,22 | 0,00003 | NM_022780    | SGK3     |
| 8146717 | 3,67 | 12,71 | 0,01129 | 4,87 | 29,21 | 0,00164 | NM_013257    | LDB1     |
| 7935968 | 3,67 | 12,69 | 0,00089 | 3,94 | 15,33 | 0,00040 | NM_003893    | HIPK2    |
| 8143307 | 3,67 | 12,69 | 0,00052 | 3,12 | 8,71  | 0,02778 | NM_022740    | GUSBL1   |
| 8112558 | 3,66 | 12,68 | 0,00255 | 4,44 | 21,69 | 0,00039 | NR_003504    | TOR1AIP1 |
| 7907773 | 3,66 | 12,68 | 0,00069 | 3,09 | 8,53  | 0,01652 | NM_015602    | PRKAG1   |
| 7962935 | 3,66 | 12,68 | 0,00028 | 3,02 | 8,09  | 0,00179 | NM_212461    | CDK8     |
| 7968199 | 3,66 | 12,67 | 0,00741 | 3,88 | 14,74 | 0,00059 | NM_001260    | PEX11B   |

|         |      |       |         |       |       |         |              |           |
|---------|------|-------|---------|-------|-------|---------|--------------|-----------|
| 7904755 | 3,66 | 12,65 | 0,00233 | 3,75  | 13,48 | 0,00000 | NM_003846    | CDC27     |
| 8016324 | 3,66 | 12,64 | 0,00025 | 2,53  | 5,79  | 0,00580 | NM_001114091 | SET       |
| 8158372 | 3,66 | 12,63 | 0,00822 | 4,87  | 29,34 | 0,00007 | NM_003011    | MAPK1     |
| 8074791 | 3,66 | 12,61 | 0,00048 | 4,28  | 19,42 | 0,00012 | NM_002745    | SLC31A1   |
| 8157270 | 3,66 | 12,61 | 0,00174 | 4,33  | 20,10 | 0,00250 | NM_001859    | NECAP1    |
| 7953715 | 3,66 | 12,61 | 0,00360 | 2,69  | 6,46  | 0,00016 | NM_015509    | IGBP1     |
| 8168087 | 3,66 | 12,60 | 0,00819 | 2,69  | 6,46  | 0,00006 | NM_001551    | LOC91316  |
| 8074925 | 3,65 | 12,57 | 0,00218 | 4,48  | 22,31 | 0,00065 | NR_024448    | SEC24D    |
| 8102482 | 3,65 | 12,57 | 0,00152 | 2,14  | 4,39  | 0,00022 | NM_014822    | CCDC72    |
| 7899346 | 3,65 | 12,57 | 0,01148 | 3,75  | 13,50 | 0,00235 | NM_015933    | MGC57346  |
| 8007799 | 3,65 | 12,55 | 0,00794 | 6,35  | 81,82 | 0,00001 | NR_026680    | PSMC4     |
| 8028756 | 3,65 | 12,54 | 0,00391 | 4,14  | 17,69 | 0,00060 | NM_006503    | RPL41     |
| 8075691 | 3,65 | 12,54 | 0,08043 | 1,89  | 3,71  | 0,05087 | NM_021104    | GPX3      |
| 8109333 | 3,65 | 12,53 | 0,00292 | 2,72  | 6,60  | 0,00007 | NM_002084    | BTBD10    |
| 7946680 | 3,65 | 12,51 | 0,00190 | 3,28  | 9,70  | 0,00059 | NM_032320    | FAM69A    |
| 7917728 | 3,64 | 12,50 | 0,00003 | 2,12  | 4,36  | 0,00534 | NM_001006605 | TUBB2C    |
| 8159642 | 3,64 | 12,50 | 0,00527 | 4,39  | 21,02 | 0,00649 | NM_006088    | ---       |
| 8005736 | 3,64 | 12,49 | 0,00567 | 2,63  | 6,18  | 0,03285 | ---          | FEZ1      |
| 7952490 | 3,64 | 12,48 | 0,00090 | 0,79  | 1,73  | 0,03908 | NM_005103    | KAT2B     |
| 8078227 | 3,64 | 12,48 | 0,00035 | 2,23  | 4,71  | 0,00364 | NM_003884    | QSER1     |
| 7939158 | 3,64 | 12,47 | 0,00019 | 3,24  | 9,47  | 0,00151 | NM_001076786 | MCL1      |
| 7919751 | 3,64 | 12,46 | 0,00090 | 2,21  | 4,63  | 0,06959 | NM_021960    | CLDND1    |
| 8089062 | 3,64 | 12,45 | 0,00028 | 4,75  | 26,90 | 0,00134 | NM_019895    | LDB2      |
| 8099524 | 3,64 | 12,43 | 0,00043 | -1,71 | -3,26 | 0,00047 | NM_001130834 | BOLA2     |
| 8000692 | 3,64 | 12,42 | 0,00046 | 2,54  | 5,80  | 0,00612 | NM_001031827 | UBXN8     |
| 8145691 | 3,63 | 12,42 | 0,00268 | 3,49  | 11,26 | 0,00078 | NM_005671    | THBS2     |
| 8130867 | 3,63 | 12,41 | 0,00397 | -0,56 | -1,48 | 0,01959 | NM_003247    | RPS27     |
| 7905691 | 3,63 | 12,40 | 0,00618 | 2,46  | 5,50  | 0,00309 | NM_001030    | CCT6A     |
| 8132943 | 3,63 | 12,38 | 0,00062 | 3,99  | 15,84 | 0,00062 | NM_001762    | SLC16A4   |
| 7918426 | 3,63 | 12,38 | 0,00329 | -0,68 | -1,60 | 0,01386 | NM_004696    | HECTD1    |
| 7978449 | 3,63 | 12,37 | 0,00033 | 3,36  | 10,24 | 0,01976 | NM_015382    | LIMA1     |
| 7963187 | 3,63 | 12,35 | 0,00148 | 3,51  | 11,36 | 0,00074 | NM_001113546 | APPL2     |
| 7966003 | 3,63 | 12,34 | 0,00001 | 2,66  | 6,34  | 0,00657 | NM_018171    | HIPK3     |
| 7939197 | 3,62 | 12,34 | 0,00138 | 3,16  | 8,95  | 0,00265 | NM_005734    | ATP1B3    |
| 8083136 | 3,62 | 12,34 | 0,00162 | 3,94  | 15,34 | 0,00125 | NM_001679    | ROCK1     |
| 8022441 | 3,62 | 12,33 | 0,00214 | 3,22  | 9,32  | 0,01380 | NM_005406    | STXBP3    |
| 7903541 | 3,62 | 12,33 | 0,00008 | 2,03  | 4,08  | 0,00203 | NM_007269    | IFNGR1    |
| 8129861 | 3,62 | 12,32 | 0,00194 | 2,92  | 7,56  | 0,00058 | NM_000416    | ATP11B    |
| 8084173 | 3,62 | 12,31 | 0,00312 | 3,62  | 12,31 | 0,00021 | NM_014616    | GOLGA7    |
| 8146122 | 3,62 | 12,31 | 0,00907 | 3,12  | 8,68  | 0,00005 | NM_016099    | RECK      |
| 8155169 | 3,62 | 12,30 | 0,00047 | 2,29  | 4,88  | 0,00178 | NM_021111    | SGK1      |
| 8129677 | 3,62 | 12,28 | 0,00015 | 1,22  | 2,33  | 0,00312 | NM_001143676 | KIAA1430  |
| 8103979 | 3,62 | 12,27 | 0,00031 | 1,36  | 2,56  | 0,14924 | NM_020827    | NOTCH2    |
| 7919095 | 3,62 | 12,26 | 0,00310 | 3,25  | 9,53  | 0,00635 | NM_024408    | RPS24     |
| 7928551 | 3,61 | 12,25 | 0,00022 | 2,01  | 4,02  | 0,08389 | NM_033022    | GABARAPL1 |
| 7953943 | 3,61 | 12,25 | 0,00219 | 3,98  | 15,76 | 0,00018 | NM_031412    | RGPD5     |
| 8054676 | 3,61 | 12,24 | 0,00118 | 2,40  | 5,30  | 0,03212 | NM_005054    | NPTN      |
| 7990253 | 3,61 | 12,24 | 0,00192 | 2,46  | 5,50  | 0,00387 | NM_012428    | CNN2      |
| 8024111 | 3,61 | 12,23 | 0,00114 | 3,93  | 15,27 | 0,00124 | NM_004368    | SETD7     |
| 8102848 | 3,61 | 12,22 | 0,00003 | 3,47  | 11,09 | 0,00016 | NM_030648    | ADSL      |
| 8073242 | 3,61 | 12,22 | 0,00165 | 4,66  | 25,23 | 0,00000 | NM_000026    | RAB6C     |
| 8055261 | 3,61 | 12,21 | 0,00128 | 4,52  | 22,98 | 0,00187 | NM_032144    | PRPF38A   |
| 7901447 | 3,61 | 12,21 | 0,00070 | 3,81  | 14,02 | 0,00079 | NM_032864    | ITGB5     |
| 8090162 | 3,61 | 12,20 | 0,00020 | 2,52  | 5,73  | 0,00102 | NM_002213    | RPL41     |
| 8061364 | 3,61 | 12,20 | 0,06778 | 1,83  | 3,56  | 0,03590 | NM_021104    | TEAD1     |
| 7938544 | 3,61 | 12,19 | 0,00076 | 3,88  | 14,69 | 0,00055 | NM_021961    | AGA       |
| 8103834 | 3,61 | 12,18 | 0,00692 | 2,00  | 3,99  | 0,00378 | NM_000027    | UAP1      |
| 7906863 | 3,60 | 12,15 | 0,00123 | 3,66  | 12,66 | 0,00016 | NM_003115    | VIPAR     |
| 7980403 | 3,60 | 12,12 | 0,00237 | 4,03  | 16,32 | 0,00004 | NM_022067    | ABCC4     |
| 7972297 | 3,60 | 12,11 | 0,00096 | 3,76  | 13,53 | 0,00164 | NM_005845    | HIAT1     |
| 7903294 | 3,60 | 12,11 | 0,00046 | 5,10  | 34,21 | 0,00475 | NM_033055    | ZNF141    |
| 8093336 | 3,60 | 12,10 | 0,00008 | 2,41  | 5,33  | 0,00234 | NM_003441    | TRPC4AP   |
| 8065832 | 3,60 | 12,09 | 0,00023 | 2,01  | 4,03  | 0,00672 | NM_015638    | POLR2B    |
| 8095269 | 3,60 | 12,09 | 0,00108 | 2,88  | 7,38  | 0,00006 | NM_000938    | UQCR10    |
| 8072274 | 3,59 | 12,07 | 0,01677 | 3,76  | 13,59 | 0,00044 | NM_001003684 | DGUOK     |
| 8042801 | 3,59 | 12,07 | 0,02252 | 3,84  | 14,34 | 0,00217 | NM_080916    | VEZT      |
| 7957613 | 3,59 | 12,07 | 0,00054 | 3,59  | 12,05 | 0,00002 | NM_017599    | VKORC1    |
| 8000998 | 3,59 | 12,06 | 0,00210 | 4,36  | 20,53 | 0,00009 | NM_024006    | SNORD53   |
| 8041168 | 3,59 | 12,04 | 0,00556 | -0,49 | -1,40 | 0,60021 | NR_002741    | ACSL3     |
| 8048733 | 3,59 | 12,01 | 0,00704 | 3,29  | 9,78  | 0,00107 | NM_004457    | PPIC      |
| 8113726 | 3,59 | 12,00 | 0,05715 | 2,77  | 6,81  | 0,00029 | NM_000943    | GDI1      |
| 8170891 | 3,58 | 11,99 | 0,00299 | 3,72  | 13,18 | 0,00423 | NM_001493    | TPM2      |
| 8161044 | 3,58 | 11,98 | 0,00677 | -0,41 | -1,33 | 0,31024 | NM_003289    | PSMD8     |

|         |      |       |         |       |       |         |              |           |
|---------|------|-------|---------|-------|-------|---------|--------------|-----------|
| 8028380 | 3,58 | 11,97 | 0,00041 | 3,33  | 10,04 | 0,00426 | NM_002812    | SERPINH1  |
| 7942596 | 3,58 | 11,93 | 0,00054 | 3,00  | 7,99  | 0,00176 | NM_001235    | DDAH1     |
| 7917347 | 3,58 | 11,93 | 0,00397 | 3,70  | 13,01 | 0,00588 | NM_012137    | EGR1      |
| 8108370 | 3,57 | 11,90 | 0,00066 | 3,25  | 9,53  | 0,00472 | NM_001964    | RPL9      |
| 7990898 | 3,57 | 11,89 | 0,00076 | 3,06  | 8,36  | 0,00112 | NM_000661    | RPN1      |
| 8090490 | 3,57 | 11,89 | 0,01278 | 3,39  | 10,51 | 0,00015 | NM_002950    | JAZF1     |
| 8138789 | 3,57 | 11,88 | 0,00034 | 2,13  | 4,39  | 0,00003 | NM_175061    | C9orf150  |
| 8154381 | 3,57 | 11,88 | 0,00178 | 3,01  | 8,03  | 0,01782 | NM_203403    | RGPD5     |
| 8054532 | 3,57 | 11,87 | 0,00077 | 2,33  | 5,03  | 0,03689 | NM_005054    | DIRC2     |
| 8082120 | 3,57 | 11,85 | 0,00442 | 4,17  | 18,04 | 0,00417 | NM_032839    | CAV2      |
| 8135587 | 3,57 | 11,85 | 0,00329 | 2,92  | 7,57  | 0,00003 | NM_001233    | UBE2J1    |
| 8128111 | 3,56 | 11,83 | 0,00463 | 4,10  | 17,20 | 0,00102 | NM_016021    | RPL41     |
| 8105432 | 3,56 | 11,83 | 0,07983 | 1,83  | 3,56  | 0,04008 | NM_021104    | AP3S2     |
| 7991357 | 3,56 | 11,82 | 0,00073 | 5,53  | 46,16 | 0,00000 | NM_005829    | RGPD5     |
| 8054557 | 3,56 | 11,82 | 0,00232 | 2,18  | 4,52  | 0,06266 | NM_032260    | NEO1      |
| 7984704 | 3,56 | 11,77 | 0,00091 | 3,86  | 14,54 | 0,00106 | NM_002499    | ASPH      |
| 8150988 | 3,56 | 11,77 | 0,00023 | 1,60  | 3,03  | 0,10866 | NM_001164750 | IFITM3    |
| 7945371 | 3,55 | 11,74 | 0,00129 | -0,82 | -1,77 | 0,09631 | NM_021034    | LGALS3BP  |
| 8018975 | 3,55 | 11,73 | 0,00007 | 1,12  | 2,17  | 0,07614 | NM_005567    | MAPK10    |
| 8101587 | 3,55 | 11,72 | 0,00217 | -0,76 | -1,69 | 0,03598 | NM_138982    | PPAP2B    |
| 7916493 | 3,55 | 11,71 | 0,01807 | 4,14  | 17,69 | 0,00092 | NM_003713    | UCHL3     |
| 7969428 | 3,55 | 11,70 | 0,00012 | 2,03  | 4,07  | 0,00025 | NM_006002    | FAM102B   |
| 7903507 | 3,55 | 11,69 | 0,00637 | 2,72  | 6,61  | 0,00067 | NM_001010883 | RPL7      |
| 7917906 | 3,55 | 11,69 | 0,01148 | 2,39  | 5,23  | 0,00343 | NM_000971    | C13orf33  |
| 7968351 | 3,55 | 11,69 | 0,01505 | -0,73 | -1,65 | 0,00972 | NM_032849    | GPCPD1    |
| 8064868 | 3,55 | 11,68 | 0,00354 | 4,61  | 24,44 | 0,00081 | NM_019593    | ---       |
| 8143035 | 3,55 | 11,68 | 0,01327 | 2,96  | 7,76  | 0,00287 | ---          | HNRNPA1   |
| 8022814 | 3,55 | 11,67 | 0,02250 | 1,33  | 2,51  | 0,00039 | NM_002136    | RPS28     |
| 8025395 | 3,54 | 11,67 | 0,03811 | 3,96  | 15,61 | 0,00010 | NM_001031    | ZBTB20    |
| 8089701 | 3,54 | 11,67 | 0,00090 | 1,44  | 2,71  | 0,00366 | NM_015642    | COIL      |
| 8016858 | 3,54 | 11,66 | 0,00004 | 3,51  | 11,38 | 0,00325 | NM_004645    | JAM3      |
| 7945262 | 3,54 | 11,65 | 0,00434 | 2,28  | 4,84  | 0,01441 | NM_032801    | CLN5      |
| 7969488 | 3,54 | 11,64 | 0,00259 | 2,74  | 6,69  | 0,00825 | NM_006493    | ESYT1     |
| 7956166 | 3,54 | 11,64 | 0,01016 | 5,08  | 33,74 | 0,00000 | NM_015292    | PSMC1     |
| 8080923 | 3,54 | 11,64 | 0,00233 | 2,18  | 4,54  | 0,00498 | NM_002802    | CA12      |
| 7989501 | 3,54 | 11,63 | 0,00517 | 0,93  | 1,90  | 0,00236 | NM_001218    | NIPAL2    |
| 8151952 | 3,54 | 11,63 | 0,00322 | 3,23  | 9,39  | 0,00048 | NM_024759    | API5      |
| 7939424 | 3,54 | 11,61 | 0,00628 | 4,92  | 30,20 | 0,00011 | NM_001142930 | C14orf166 |
| 7974352 | 3,54 | 11,61 | 0,00127 | 2,72  | 6,57  | 0,00454 | NM_016039    | ATP5O     |
| 8070160 | 3,54 | 11,60 | 0,00137 | 2,97  | 7,84  | 0,00861 | NM_001697    | KIAA1143  |
| 7978542 | 3,53 | 11,59 | 0,00131 | 2,08  | 4,24  | 0,00953 | NM_020696    | CUTC      |
| 7929768 | 3,53 | 11,59 | 0,00415 | 4,77  | 27,29 | 0,00019 | NM_015960    | LIPA      |
| 7934920 | 3,53 | 11,58 | 0,00577 | 3,81  | 14,06 | 0,00003 | NM_001127605 | LGMN      |
| 7980958 | 3,53 | 11,57 | 0,00079 | 4,02  | 16,20 | 0,00359 | NM_005606    | SCAMP1    |
| 8106479 | 3,53 | 11,56 | 0,00246 | 3,03  | 8,14  | 0,00070 | NM_004866    | DCP1B     |
| 7960320 | 3,53 | 11,55 | 0,00628 | 2,56  | 5,90  | 0,00077 | NM_152640    | NUP155    |
| 8111629 | 3,53 | 11,54 | 0,00290 | 4,29  | 19,57 | 0,01563 | NM_153485    | SYPL1     |
| 8142110 | 3,53 | 11,53 | 0,01022 | 3,46  | 11,02 | 0,00055 | NM_006754    | TGFBR3    |
| 7917649 | 3,53 | 11,52 | 0,00347 | 0,63  | 1,55  | 0,17815 | NM_003243    | NDST1     |
| 8109283 | 3,53 | 11,51 | 0,00319 | 2,68  | 6,41  | 0,00534 | NM_001543    | EEF2      |
| 8032730 | 3,52 | 11,51 | 0,00490 | 3,88  | 14,76 | 0,00178 | NM_001961    | TRPA1     |
| 8151341 | 3,52 | 11,50 | 0,00075 | -1,13 | -2,19 | 0,01806 | NM_007332    | FADS2     |
| 7940565 | 3,52 | 11,50 | 0,00207 | 4,24  | 18,84 | 0,00222 | NM_004265    | NDUFB2    |
| 8039068 | 3,52 | 11,49 | 0,00041 | 3,09  | 8,54  | 0,00966 | NM_021074    | BCAT1     |
| 7961829 | 3,52 | 11,49 | 0,00256 | 3,66  | 12,64 | 0,00000 | NM_005504    | PHF10     |
| 8123463 | 3,52 | 11,48 | 0,00121 | 3,60  | 12,10 | 0,00252 | NM_018288    | DDT       |
| 8074969 | 3,52 | 11,47 | 0,01213 | 4,06  | 16,65 | 0,00038 | NM_001355    | PKN2      |
| 7902822 | 3,52 | 11,47 | 0,00351 | 4,71  | 26,24 | 0,00095 | NM_006256    | RHOA      |
| 8087409 | 3,52 | 11,47 | 0,00818 | 3,62  | 12,26 | 0,00039 | NM_001664    | ACOT13    |
| 8117219 | 3,52 | 11,46 | 0,00457 | 3,44  | 10,87 | 0,00032 | NM_018473    | ELMO2     |
| 8066716 | 3,52 | 11,44 | 0,00368 | 3,99  | 15,93 | 0,00000 | NM_133171    | MRPS24    |
| 8139250 | 3,52 | 11,43 | 0,03950 | 5,67  | 50,90 | 0,00001 | NM_032014    | TAOK1     |
| 8006030 | 3,51 | 11,42 | 0,00074 | 3,71  | 13,09 | 0,00295 | NM_020791    | FBXO7     |
| 8072610 | 3,51 | 11,42 | 0,00953 | 3,81  | 14,03 | 0,00101 | NM_012179    | SBNO1     |
| 7967420 | 3,51 | 11,42 | 0,00686 | 3,95  | 15,45 | 0,00004 | NM_001167856 | PMS2L2    |
| 8140239 | 3,51 | 11,41 | 0,00216 | 4,42  | 21,46 | 0,00003 | NR_003614    | KPNA2     |
| 8019737 | 3,51 | 11,41 | 0,00045 | 4,35  | 20,43 | 0,00050 | NM_002266    | SLC16A7   |
| 7956658 | 3,51 | 11,41 | 0,00553 | -0,97 | -1,96 | 0,01277 | NM_004731    | NF1       |
| 8006239 | 3,51 | 11,40 | 0,00017 | 3,58  | 11,94 | 0,02225 | NM_001042492 | C12orf35  |
| 7954711 | 3,51 | 11,40 | 0,00006 | 2,01  | 4,03  | 0,00560 | NM_018169    | UBE2G1    |
| 8011626 | 3,51 | 11,39 | 0,01033 | 4,12  | 17,34 | 0,01255 | NM_003342    | JKAMP     |
| 7974725 | 3,51 | 11,37 | 0,00177 | 4,79  | 27,60 | 0,00012 | NM_016475    | ATXN7L1   |
| 8142102 | 3,51 | 11,35 | 0,00062 | 2,63  | 6,20  | 0,00237 | NM_020725    | NAA25     |

|         |      |       |         |       |       |         |               |          |
|---------|------|-------|---------|-------|-------|---------|---------------|----------|
| 7966462 | 3,50 | 11,35 | 0,01238 | 4,12  | 17,38 | 0,00016 | NM_024953     | ZFAND2A  |
| 8137709 | 3,50 | 11,35 | 0,00204 | 3,93  | 15,29 | 0,00384 | NM_182491     | ZNF654   |
| 8081069 | 3,50 | 11,34 | 0,00030 | 1,86  | 3,62  | 0,03629 | NM_018293     | NNMT     |
| 7943998 | 3,50 | 11,34 | 0,00246 | 2,68  | 6,41  | 0,00611 | NM_006169     | KLHDC3   |
| 8119648 | 3,50 | 11,33 | 0,00122 | 4,01  | 16,17 | 0,00012 | NM_057161     | PAF1     |
| 8036720 | 3,50 | 11,33 | 0,00004 | 2,73  | 6,62  | 0,00213 | NM_019088     | KCMF1    |
| 8043105 | 3,50 | 11,32 | 0,01399 | 4,93  | 30,49 | 0,00089 | NM_020122     | COPB2    |
| 8091048 | 3,50 | 11,32 | 0,00027 | 2,99  | 7,97  | 0,00361 | NM_004766     | ZNF717   |
| 8088911 | 3,50 | 11,32 | 0,00023 | 5,30  | 39,47 | 0,00026 | NM_001128223  | PSMC1    |
| 7976189 | 3,50 | 11,31 | 0,00194 | 2,17  | 4,49  | 0,00752 | NM_002802     | GDAP2    |
| 7918955 | 3,50 | 11,30 | 0,00055 | 4,06  | 16,67 | 0,00017 | NM_001135589  | NEU1     |
| 8178676 | 3,50 | 11,29 | 0,00407 | 2,69  | 6,47  | 0,00286 | NM_000434     | SKIV2L2  |
| 8105353 | 3,50 | 11,28 | 0,00127 | 3,22  | 9,35  | 0,00016 | NM_015360     | VKORC1L1 |
| 8133114 | 3,50 | 11,28 | 0,00087 | 3,51  | 11,42 | 0,00019 | NM_173517     | TMOD2    |
| 7983734 | 3,50 | 11,28 | 0,00131 | 1,45  | 2,73  | 0,01216 | NM_014548     | SRP54    |
| 7973902 | 3,49 | 11,27 | 0,00351 | 4,30  | 19,75 | 0,00068 | NM_003136     | COL1A1   |
| 8016646 | 3,49 | 11,27 | 0,00015 | -0,67 | -1,59 | 0,19746 | NM_000088     | MPHOSPH9 |
| 7967386 | 3,49 | 11,26 | 0,00017 | 3,55  | 11,74 | 0,00007 | NM_022782     | LRRC42   |
| 7901577 | 3,49 | 11,23 | 0,00035 | 2,18  | 4,53  | 0,00019 | NM_052940     | RALGAPB  |
| 8062492 | 3,49 | 11,23 | 0,00026 | 2,95  | 7,74  | 0,00048 | NM_020336     | NDUFA4   |
| 8138224 | 3,49 | 11,22 | 0,00033 | 1,67  | 3,19  | 0,03341 | NM_002489     | ATP2B4   |
| 7908940 | 3,49 | 11,21 | 0,00490 | 2,38  | 5,20  | 0,00074 | NM_001001396  | SNORD5   |
| 7951036 | 3,49 | 11,21 | 0,00356 | 1,53  | 2,88  | 0,20256 | NR_003033     | TMEM62   |
| 7983157 | 3,49 | 11,20 | 0,01286 | 4,12  | 17,45 | 0,00004 | NM_024956     | SCML1    |
| 8166278 | 3,49 | 11,20 | 0,00717 | 3,55  | 11,71 | 0,00096 | NM_001037540  | RPL9     |
| 8171834 | 3,48 | 11,19 | 0,00063 | 3,01  | 8,05  | 0,00125 | NM_000661     | ANTXR2   |
| 8101260 | 3,48 | 11,19 | 0,01349 | 2,26  | 4,80  | 0,00328 | NM_058172     | TXNL1    |
| 8023450 | 3,48 | 11,17 | 0,00118 | 1,73  | 3,33  | 0,01073 | NR_024546     | SGCE     |
| 8141035 | 3,48 | 11,16 | 0,00187 | 4,36  | 20,47 | 0,00053 | NM_001099401  | HMGCR    |
| 8106280 | 3,48 | 11,16 | 0,00282 | 2,83  | 7,13  | 0,00914 | NM_000859     | SLC10A7  |
| 8103043 | 3,48 | 11,15 | 0,00079 | 3,09  | 8,49  | 0,00287 | NM_001029998  | RAB27B   |
| 8021301 | 3,48 | 11,14 | 0,00085 | 1,52  | 2,88  | 0,09729 | NM_004163     | LRRC28   |
| 7986394 | 3,48 | 11,12 | 0,01957 | 4,45  | 21,88 | 0,00105 | NM_144598     | MORC4    |
| 8174322 | 3,48 | 11,12 | 0,00227 | 2,31  | 4,97  | 0,01372 | NM_024657     | RAB31    |
| 8020110 | 3,47 | 11,11 | 0,01214 | 4,88  | 29,54 | 0,00413 | NM_006868     | PDGFRL   |
| 8144802 | 3,47 | 11,11 | 0,00177 | 1,36  | 2,57  | 0,00491 | NM_006207     | MBTPS1   |
| 8003089 | 3,47 | 11,10 | 0,00525 | 3,40  | 10,57 | 0,00021 | NM_003791     | NEDD8    |
| 7978201 | 3,47 | 11,09 | 0,02912 | 3,72  | 13,21 | 0,00080 | NM_006156     | SPG20    |
| 7970999 | 3,47 | 11,08 | 0,01300 | 2,30  | 4,94  | 0,00200 | NM_015087     | NIT2     |
| 8081277 | 3,47 | 11,07 | 0,00382 | 4,81  | 28,02 | 0,00072 | NM_020202     | MYO1D    |
| 8014115 | 3,46 | 11,04 | 0,00244 | 3,09  | 8,52  | 0,00282 | NM_015194     | MLXIP    |
| 7959361 | 3,46 | 11,01 | 0,01111 | 4,37  | 20,74 | 0,00002 | NM_014938     | TMEM183A |
| 7908867 | 3,46 | 11,00 | 0,00595 | 4,10  | 17,18 | 0,00000 | NM_138391     | KCTD3    |
| 7909745 | 3,46 | 11,00 | 0,00275 | 3,60  | 12,17 | 0,00013 | NM_016121     | CCAR1    |
| 7927889 | 3,46 | 10,99 | 0,00256 | 2,66  | 6,33  | 0,03857 | NM_018237     | DOCK7    |
| 7916669 | 3,46 | 10,99 | 0,00023 | 2,93  | 7,62  | 0,00098 | NM_033407     | RAB5C    |
| 8015545 | 3,46 | 10,97 | 0,01605 | 5,63  | 49,48 | 0,00019 | NM_201434     | VAMP4    |
| 7922309 | 3,46 | 10,97 | 0,00679 | 3,47  | 11,07 | 0,00116 | NM_003762     | EMP1     |
| 7954090 | 3,45 | 10,96 | 0,00321 | -0,05 | -1,04 | 0,83130 | NM_001423     | PSMD11   |
| 8006392 | 3,45 | 10,96 | 0,00021 | 3,19  | 9,10  | 0,00060 | NM_002815     | GXYLT2   |
| 8080964 | 3,45 | 10,96 | 0,01461 | 1,17  | 2,25  | 0,02036 | NM_001080393  | TET2     |
| 8096675 | 3,45 | 10,95 | 0,00667 | 2,98  | 7,86  | 0,00783 | NM_001127208  | RPS28    |
| 7942824 | 3,45 | 10,94 | 0,04093 | 3,83  | 14,25 | 0,00007 | NM_001031     | ALCAM    |
| 8081431 | 3,45 | 10,93 | 0,00038 | 2,80  | 6,96  | 0,03080 | NM_001627     | PCMTD2   |
| 8097064 | 3,45 | 10,93 | 0,03833 | 2,81  | 7,02  | 0,18171 | BC032332 PHF3 |          |
| 8120441 | 3,45 | 10,92 | 0,00235 | 1,66  | 3,16  | 0,00098 | NM_015153     | CAMK2N1  |
| 7913237 | 3,45 | 10,92 | 0,00028 | 2,81  | 7,01  | 0,00320 | NM_018584     | YIPF6    |
| 8168018 | 3,45 | 10,91 | 0,00294 | 3,92  | 15,15 | 0,00127 | NM_173834     | PLCB1    |
| 8060854 | 3,45 | 10,90 | 0,00308 | 2,02  | 4,05  | 0,00543 | NM_182734     | STRN     |
| 8051443 | 3,45 | 10,90 | 0,00083 | 3,67  | 12,70 | 0,00202 | NM_003162     | H3F3A    |
| 8169740 | 3,45 | 10,90 | 0,03740 | 2,17  | 4,52  | 0,00027 | NM_002107     | PMS2L5   |
| 8140269 | 3,45 | 10,90 | 0,00169 | 4,26  | 19,17 | 0,00006 | NR_027775     | CCDC6    |
| 7933760 | 3,45 | 10,89 | 0,00418 | 2,73  | 6,61  | 0,02328 | NM_005436     | ETV5     |
| 8092578 | 3,45 | 10,89 | 0,00018 | 3,88  | 14,74 | 0,00000 | NM_004454     | ENAH     |
| 7924619 | 3,44 | 10,89 | 0,00057 | 1,77  | 3,40  | 0,01038 | NM_001008493  | TGF2     |
| 7909789 | 3,44 | 10,88 | 0,00220 | 3,10  | 8,58  | 0,00187 | NM_001135599  | FAM38B   |
| 8022283 | 3,44 | 10,88 | 0,00847 | 0,21  | 1,16  | 0,41244 | NM_022068     | EIF5AL1  |
| 7928630 | 3,44 | 10,87 | 0,00123 | 3,68  | 12,80 | 0,00104 | NM_001099692  | SP100    |
| 8048940 | 3,44 | 10,86 | 0,00067 | 1,58  | 2,99  | 0,00432 | NM_001080391  | HLA-J    |
| 8179049 | 3,44 | 10,85 | 0,00340 | 4,53  | 23,10 | 0,00049 | NR_024240     | UBE2R2   |
| 8154856 | 3,44 | 10,85 | 0,00026 | 3,00  | 7,98  | 0,00550 | NM_017811     | GALNT1   |
| 8020903 | 3,44 | 10,85 | 0,00039 | 2,67  | 6,34  | 0,00003 | NM_020474     | SMG1     |
| 7994006 | 3,44 | 10,85 | 0,00034 | 3,06  | 8,36  | 0,00945 | NM_015092     | AHCYL1   |

|         |      |       |         |       |       |         |                |           |
|---------|------|-------|---------|-------|-------|---------|----------------|-----------|
| 7903803 | 3,44 | 10,84 | 0,00022 | 3,78  | 13,78 | 0,00050 | NM_006621      | METTLL14  |
| 8097066 | 3,44 | 10,83 | 0,00170 | 2,40  | 5,28  | 0,00325 | NM_020961      | ANTXR1    |
| 8042439 | 3,44 | 10,83 | 0,00062 | 4,39  | 20,91 | 0,00004 | NM_032208      | C5orf15   |
| 8114138 | 3,44 | 10,83 | 0,00871 | 2,54  | 5,81  | 0,00036 | NM_020199      | GMPS      |
| 8083523 | 3,43 | 10,80 | 0,00045 | 3,32  | 10,00 | 0,00609 | NM_003875      | TMEM41B   |
| 7946504 | 3,43 | 10,80 | 0,00095 | 3,27  | 9,64  | 0,00680 | NM_015012      | O2_Sep    |
| 8049827 | 3,43 | 10,79 | 0,00235 | 3,55  | 11,68 | 0,00227 | NM_001008492   | STEAP2    |
| 8134036 | 3,43 | 10,78 | 0,00217 | 2,18  | 4,52  | 0,07323 | NM_152999      | RLF       |
| 7900395 | 3,43 | 10,78 | 0,00845 | 2,97  | 7,83  | 0,00208 | NM_012421      | GRN       |
| 8007620 | 3,43 | 10,78 | 0,00213 | 4,39  | 20,99 | 0,00222 | NM_002087      | PITPNB    |
| 8075130 | 3,43 | 10,75 | 0,00081 | 2,54  | 5,80  | 0,00314 | NM_012399      | QARS      |
| 8087283 | 3,43 | 10,75 | 0,00743 | 5,16  | 35,66 | 0,00003 | NM_005051      | MTMR2     |
| 7951112 | 3,42 | 10,74 | 0,00223 | 3,44  | 10,85 | 0,00065 | NM_201278      | HNRPA1L-2 |
| 8034313 | 3,42 | 10,73 | 0,02058 | 1,71  | 3,28  | 0,00026 | NR_002944      | MT2A      |
| 7995783 | 3,42 | 10,73 | 0,02369 | 2,38  | 5,19  | 0,03707 | NM_005953      | PHACTR4   |
| 7899455 | 3,42 | 10,72 | 0,03364 | 4,97  | 31,26 | 0,00022 | NM_001048183   | COL6A3    |
| 8059905 | 3,42 | 10,71 | 0,00101 | -0,95 | -1,93 | 0,00872 | NM_004369      | SF3A3     |
| 7915130 | 3,42 | 10,71 | 0,00079 | 3,99  | 15,93 | 0,00025 | NM_006802      | LEPROTL1  |
| 8145652 | 3,42 | 10,70 | 0,01007 | 3,38  | 10,41 | 0,00013 | NM_015344      | COMMD2    |
| 8091432 | 3,42 | 10,69 | 0,02829 | 4,86  | 28,96 | 0,00087 | NM_016094      | PRDX1     |
| 7915733 | 3,42 | 10,68 | 0,00199 | 3,85  | 14,43 | 0,00009 | NM_002574      | BMI1      |
| 7926609 | 3,42 | 10,68 | 0,00057 | 3,95  | 15,45 | 0,00087 | NM_005180      | CFB       |
| 8179351 | 3,42 | 10,67 | 0,00823 | 0,21  | 1,16  | 0,53956 | NM_001710      | MT2A      |
| 8095362 | 3,42 | 10,67 | 0,02216 | 2,62  | 6,16  | 0,00159 | NM_005953      | MAPK9     |
| 8116402 | 3,41 | 10,66 | 0,00073 | 4,12  | 17,43 | 0,00036 | NM_139068      | SMCHD1    |
| 8019885 | 3,41 | 10,66 | 0,00051 | 3,54  | 11,59 | 0,01799 | NM_015295      | RNU1-1    |
| 7919269 | 3,41 | 10,66 | 0,03562 | -0,63 | -1,55 | 0,39247 | NR_004430      | RNU1-1    |
| 7919349 | 3,41 | 10,66 | 0,03562 | -0,63 | -1,55 | 0,39247 | NR_004430      | ATXN7L1   |
| 8142087 | 3,41 | 10,66 | 0,00071 | 2,39  | 5,24  | 0,00958 | NM_020725      | WRB       |
| 8068612 | 3,41 | 10,65 | 0,00886 | 3,22  | 9,29  | 0,00155 | NM_004627      | HERPUD2   |
| 8139003 | 3,41 | 10,63 | 0,00909 | 2,81  | 7,03  | 0,00015 | NM_022373      | PMS2L4    |
| 8139896 | 3,41 | 10,62 | 0,00252 | 5,52  | 45,89 | 0,00008 | NR_022007      | ORC5L     |
| 8142019 | 3,41 | 10,62 | 0,00174 | 3,32  | 9,97  | 0,00065 | NM_002553      | CNOT2     |
| 7957106 | 3,41 | 10,61 | 0,00083 | 3,24  | 9,47  | 0,00070 | NM_014515      | ST13      |
| 8076272 | 3,40 | 10,59 | 0,01154 | 2,02  | 4,06  | 0,00859 | NM_003932      | NT5C2     |
| 7936064 | 3,40 | 10,56 | 0,01816 | 4,16  | 17,87 | 0,00184 | NM_012229      | SMA5      |
| 8105995 | 3,40 | 10,56 | 0,00238 | 4,51  | 22,83 | 0,00067 | AK289851 REV3L |           |
| 8128894 | 3,40 | 10,55 | 0,00054 | 2,71  | 6,53  | 0,00680 | NM_002912      | PGD       |
| 7897620 | 3,40 | 10,55 | 0,00935 | 4,73  | 26,60 | 0,00087 | NM_002631      | SCUBE3    |
| 8118890 | 3,40 | 10,54 | 0,00186 | -0,77 | -1,70 | 0,24746 | NM_152753      | FAM3C     |
| 8166442 | 3,40 | 10,54 | 0,00109 | 3,45  | 10,94 | 0,00003 | NM_014888      | KIAA0494  |
| 7915882 | 3,40 | 10,53 | 0,00398 | 3,19  | 9,10  | 0,00271 | NM_014774      | FKBP10    |
| 8007154 | 3,39 | 10,51 | 0,00284 | 3,17  | 8,99  | 0,00047 | NM_021939      | MGST3     |
| 7906978 | 3,39 | 10,50 | 0,00040 | 3,95  | 15,42 | 0,00019 | NM_004528      | GALNT5    |
| 8045835 | 3,39 | 10,49 | 0,00047 | -1,03 | -2,05 | 0,01957 | NM_014568      | TOX4      |
| 7973214 | 3,39 | 10,49 | 0,00054 | 4,13  | 17,56 | 0,00001 | NM_014828      | PAIP1     |
| 8111974 | 3,39 | 10,49 | 0,00005 | 2,70  | 6,50  | 0,00421 | NM_006451      | ERO1L     |
| 7979179 | 3,39 | 10,49 | 0,00441 | 4,03  | 16,29 | 0,00034 | NM_014584      | TRAM2     |
| 8127051 | 3,39 | 10,48 | 0,00654 | 3,62  | 12,26 | 0,00266 | NM_012288      | METTLL9   |
| 7993833 | 3,39 | 10,48 | 0,00037 | 2,26  | 4,78  | 0,00004 | NM_016025      | RNF130    |
| 8116372 | 3,39 | 10,47 | 0,00069 | 3,36  | 10,27 | 0,00025 | NM_018434      | TMTC1     |
| 7962058 | 3,39 | 10,47 | 0,00891 | -0,89 | -1,85 | 0,00702 | NM_175861      | PSME2     |
| 7978123 | 3,39 | 10,47 | 0,01545 | 3,06  | 8,33  | 0,00595 | NM_002818      | EIF2AK1   |
| 8138045 | 3,39 | 10,46 | 0,00355 | 4,42  | 21,40 | 0,00023 | NM_014413      | CBLB      |
| 8089261 | 3,39 | 10,46 | 0,00162 | 2,24  | 4,72  | 0,00123 | NM_170662      | EML4      |
| 8041592 | 3,39 | 10,46 | 0,01650 | 3,71  | 13,11 | 0,01944 | NM_019063      | AKAP11    |
| 7968835 | 3,39 | 10,45 | 0,00157 | 2,00  | 4,00  | 0,01088 | NM_016248      | DDOST     |
| 7913256 | 3,38 | 10,44 | 0,00117 | 3,81  | 14,02 | 0,00205 | NM_005216      | EXOC5     |
| 7979367 | 3,38 | 10,44 | 0,00199 | 4,00  | 16,05 | 0,00022 | NM_006544      | ---       |
| 7907859 | 3,38 | 10,44 | 0,00266 | 2,07  | 4,20  | 0,00582 | ---            | XPO1      |
| 8052526 | 3,38 | 10,44 | 0,00265 | 3,59  | 12,08 | 0,00199 | NM_003400      | HMG20A    |
| 7985119 | 3,38 | 10,44 | 0,00174 | 3,15  | 8,86  | 0,00194 | NM_018200      | HEATR5A   |
| 7978492 | 3,38 | 10,44 | 0,00859 | 3,87  | 14,61 | 0,00275 | NM_015473      | ARNT      |
| 7919825 | 3,38 | 10,43 | 0,00289 | 3,54  | 11,64 | 0,00011 | NM_001668      | TCP11L2   |
| 7958262 | 3,38 | 10,42 | 0,01456 | 3,75  | 13,47 | 0,00066 | NM_152772      | ENPP5     |
| 8126750 | 3,38 | 10,42 | 0,00160 | 3,88  | 14,69 | 0,00694 | NM_021572      | TMEM106C  |
| 7955063 | 3,38 | 10,41 | 0,00367 | 4,27  | 19,31 | 0,00090 | NM_001143842   | SENPF6    |
| 8120758 | 3,38 | 10,40 | 0,00114 | 2,92  | 7,56  | 0,00665 | NM_015571      | KRIT1     |
| 8140878 | 3,38 | 10,40 | 0,00114 | 3,65  | 12,51 | 0,00058 | NM_194455      | EFNA5     |
| 8113433 | 3,38 | 10,39 | 0,00105 | 2,23  | 4,71  | 0,01847 | NM_001962      | RPS27     |
| 7923438 | 3,38 | 10,39 | 0,00542 | 2,47  | 5,53  | 0,00059 | NM_001030      | C5orf41   |
| 8110032 | 3,38 | 10,38 | 0,01194 | 2,28  | 4,84  | 0,00597 | NM_153607      | CALM3     |
| 8029831 | 3,38 | 10,38 | 0,00171 | 3,39  | 10,48 | 0,00010 | NM_005184      | ---       |

|         |      |       |         |       |       |         |                 |           |  |
|---------|------|-------|---------|-------|-------|---------|-----------------|-----------|--|
| 8047763 | 3,37 | 10,37 | 0,02766 | -0,15 | -1,11 | 0,61385 | ---             | TROVE2    |  |
| 7908421 | 3,37 | 10,36 | 0,00143 | 3,34  | 10,11 | 0,00661 | NM_004600       | CCDC99    |  |
| 8109830 | 3,37 | 10,36 | 0,00185 | 4,39  | 20,95 | 0,00011 | NM_017785       | ZNF626    |  |
| 8035795 | 3,37 | 10,35 | 0,00016 | -0,41 | -1,33 | 0,26461 | NM_145297       | ATM       |  |
| 7943620 | 3,37 | 10,35 | 0,00041 | 2,65  | 6,26  | 0,01044 | NM_000051       | DSEL      |  |
| 8023727 | 3,37 | 10,34 | 0,00409 | -1,64 | -3,13 | 0,05880 | NM_032160       | RPS26     |  |
| 8007797 | 3,37 | 10,33 | 0,03571 | 1,73  | 3,31  | 0,04452 | NM_001029       | MFAP4     |  |
| 8013341 | 3,37 | 10,32 | 0,04371 | -1,24 | -2,37 | 0,04183 | NM_002404       | UBA3      |  |
| 8088718 | 3,37 | 10,31 | 0,00326 | 3,22  | 9,32  | 0,00136 | NM_003968       | ACBD3     |  |
| 7924701 | 3,37 | 10,31 | 0,00082 | 3,60  | 12,11 | 0,00001 | NM_022735       | EIF5AL1   |  |
| 7934753 | 3,36 | 10,30 | 0,00247 | 3,65  | 12,56 | 0,00070 | NM_001099692    | SLC38A6   |  |
| 7974816 | 3,36 | 10,29 | 0,00339 | 3,28  | 9,73  | 0,00148 | NM_001172702    | ERRFI1    |  |
| 7912157 | 3,36 | 10,28 | 0,01380 | 4,33  | 20,17 | 0,00621 | NM_018948       | PA2G4     |  |
| 7956152 | 3,36 | 10,28 | 0,00886 | 4,15  | 17,81 | 0,00122 | NM_006191       | PYGL      |  |
| 7979085 | 3,36 | 10,27 | 0,00119 | 3,82  | 14,15 | 0,00730 | NM_002863       | ZNF138    |  |
| 8133057 | 3,36 | 10,27 | 0,00010 | 2,73  | 6,61  | 0,00185 | NR_027660       | PRKACB    |  |
| 7902594 | 3,36 | 10,27 | 0,00102 | 2,89  | 7,39  | 0,00057 | NM_182948       | PRRG1     |  |
| 8166705 | 3,36 | 10,26 | 0,00785 | 2,21  | 4,61  | 0,00744 | NM_000950       | KDM5B     |  |
| 7923453 | 3,36 | 10,24 | 0,00112 | 3,07  | 8,39  | 0,00060 | NM_006618       | PMS2L5    |  |
| 8140258 | 3,36 | 10,24 | 0,00282 | 4,29  | 19,63 | 0,00008 | NR_027775       | STAG2     |  |
| 8169750 | 3,36 | 10,24 | 0,00095 | 3,15  | 8,89  | 0,00064 | NM_001042750    | GSPT1     |  |
| 7999532 | 3,35 | 10,22 | 0,00038 | 2,43  | 5,40  | 0,00758 | NM_002094       | CPA4      |  |
| 8136200 | 3,35 | 10,22 | 0,00715 | -0,28 | -1,21 | 0,02259 | NM_016352       | HIGD1A    |  |
| 8086451 | 3,35 | 10,20 | 0,00271 | 2,57  | 5,93  | 0,00046 | NM_001099669    | HSP90AA6P |  |
| 8103722 | 3,35 | 10,20 | 0,00864 | 2,77  | 6,83  | 0,02204 | AY956762 SAP18  |           |  |
| 7967976 | 3,35 | 10,20 | 0,00268 | 2,01  | 4,03  | 0,00613 | NM_005870       | PRCP      |  |
| 7950731 | 3,35 | 10,19 | 0,03171 | 2,76  | 6,78  | 0,00197 | NM_199418       | ITM2C     |  |
| 8048995 | 3,35 | 10,18 | 0,00146 | 3,17  | 9,01  | 0,00141 | NM_030926       | C4orf34   |  |
| 8099912 | 3,35 | 10,17 | 0,00177 | 4,11  | 17,31 | 0,00088 | BC008502 HOOK3  |           |  |
| 8146243 | 3,35 | 10,17 | 0,00073 | 2,74  | 6,66  | 0,00652 | NM_032410       | UGGT1     |  |
| 8045090 | 3,35 | 10,17 | 0,00311 | 3,84  | 14,34 | 0,00278 | NM_020120       | ZNF521    |  |
| 8022612 | 3,35 | 10,17 | 0,00261 | -0,89 | -1,85 | 0,01221 | NM_015461       | YWHAH     |  |
| 8072577 | 3,35 | 10,16 | 0,00483 | 2,79  | 6,92  | 0,00254 | NM_003405       | FAM160B1  |  |
| 7930682 | 3,34 | 10,16 | 0,00042 | 2,35  | 5,10  | 0,08995 | NM_020940       | CCNC      |  |
| 8128429 | 3,34 | 10,15 | 0,00344 | 3,68  | 12,86 | 0,00313 | NM_005190       | NRIP1     |  |
| 8069553 | 3,34 | 10,15 | 0,00148 | 3,69  | 12,94 | 0,01998 | NM_003489       | SPCS1     |  |
| 8080438 | 3,34 | 10,13 | 0,00574 | 2,98  | 7,87  | 0,00041 | NM_014041       | IMPACT    |  |
| 8020668 | 3,34 | 10,11 | 0,00040 | 3,42  | 10,70 | 0,00334 | NM_018439       | PCMTD2    |  |
| 8176865 | 3,34 | 10,10 | 0,02974 | 2,45  | 5,45  | 0,20057 | BC032332 PCMTD2 |           |  |
| 8177460 | 3,34 | 10,10 | 0,02974 | 2,45  | 5,45  | 0,20057 | BC032332 ADH1C  |           |  |
| 8101893 | 3,34 | 10,10 | 0,01727 | -0,43 | -1,35 | 0,28376 | NM_000669       | MAPRE1    |  |
| 8061772 | 3,33 | 10,09 | 0,00162 | 5,25  | 38,15 | 0,00026 | NM_012325       | DR1       |  |
| 7903079 | 3,33 | 10,09 | 0,00061 | 4,00  | 15,99 | 0,00275 | NM_001938       | SERPINF1  |  |
| 8003667 | 3,33 | 10,08 | 0,00319 | 0,32  | 1,25  | 0,43217 | NM_002615       | TM4SF1    |  |
| 8091411 | 3,33 | 10,08 | 0,02122 | 5,42  | 42,76 | 0,00166 | NM_014220       | ATP7A     |  |
| 8168472 | 3,33 | 10,08 | 0,00145 | 1,92  | 3,79  | 0,01001 | NM_000052       | MDH1      |  |
| 8042259 | 3,33 | 10,06 | 0,00095 | 3,46  | 10,97 | 0,00054 | NM_005917       | CCNT1     |  |
| 7962831 | 3,33 | 10,05 | 0,00477 | 3,76  | 13,58 | 0,00088 | NM_001240       | EIF2B1    |  |
| 7967473 | 3,33 | 10,05 | 0,00137 | 4,42  | 21,35 | 0,00021 | NM_001414       | SRPRB     |  |
| 8082816 | 3,33 | 10,05 | 0,00917 | 4,31  | 19,82 | 0,00001 | NM_021203       | EFEMP2    |  |
| 7949503 | 3,33 | 10,04 | 0,00063 | -0,36 | -1,29 | 0,16967 | NM_016938       | SDAD1     |  |
| 8101099 | 3,33 | 10,03 | 0,00209 | 3,81  | 14,00 | 0,00018 | NM_018115       | EBPL      |  |
| 7971615 | 3,33 | 10,03 | 0,00109 | 2,17  | 4,50  | 0,08372 | NM_032565       | CISD1     |  |
| 7927649 | 3,32 | 10,02 | 0,00382 | 3,80  | 13,98 | 0,00053 | NM_018464       | PSENFEN   |  |
| 8027996 | 3,32 | 10,01 | 0,00861 | 4,42  | 21,41 | 0,00007 | NM_172341       | MIA3      |  |
| 7909898 | 3,32 | 10,00 | 0,00559 | 2,75  | 6,74  | 0,00126 | NM_198551       | LSM12     |  |
| 8150206 | 3,32 | 9,98  | 0,00143 | 4,20  | 18,44 | 0,00029 | NM_152344       | AZ12      |  |
| 8085954 | 3,32 | 9,98  | 0,00376 | 3,02  | 8,10  | 0,00097 | NM_022461       | HP1BP3    |  |
| 7913300 | 3,32 | 9,98  | 0,00439 | 3,90  | 14,95 | 0,00139 | NM_016287       | EPHA7     |  |
| 8128284 | 3,32 | 9,97  | 0,00166 | -1,11 | -2,16 | 0,00497 | NM_004440       | CCND2     |  |
| 7953200 | 3,32 | 9,97  | 0,01046 | -1,50 | -2,84 | 0,01491 | NM_001759       | LASP1     |  |
| 8006820 | 3,32 | 9,97  | 0,00152 | 3,56  | 11,83 | 0,00012 | NM_006148       | NUP153    |  |
| 8124059 | 3,32 | 9,97  | 0,00216 | 3,67  | 12,70 | 0,00228 | NM_005124       | NAA35     |  |
| 8156167 | 3,32 | 9,97  | 0,00435 | 4,33  | 20,08 | 0,00039 | NM_024635       | NSL1      |  |
| 7924172 | 3,32 | 9,96  | 0,00108 | 3,17  | 9,00  | 0,00110 | NM_015471       | RAD21     |  |
| 8152477 | 3,32 | 9,95  | 0,00370 | 3,64  | 12,42 | 0,00006 | NM_006265       | EPAS1     |  |
| 8041781 | 3,32 | 9,95  | 0,00100 | 3,44  | 10,84 | 0,00107 | NM_001430       | KPNA3     |  |
| 7971620 | 3,31 | 9,95  | 0,00275 | 3,72  | 13,21 | 0,00095 | NM_002267       | MAP4K4    |  |
| 8043945 | 3,31 | 9,94  | 0,00189 | 3,47  | 11,11 | 0,00011 | NM_145686       | PUM2      |  |
| 8050565 | 3,31 | 9,92  | 0,00013 | 3,25  | 9,49  | 0,01067 | NM_015317       | IFNAR1    |  |
| 8068266 | 3,31 | 9,91  | 0,00072 | 2,50  | 5,64  | 0,00424 | NM_000629       | ZBTB34    |  |
| 8157947 | 3,31 | 9,90  | 0,00406 | 2,80  | 6,98  | 0,00591 | NM_001099270    | EPHA4     |  |
| 8059279 | 3,31 | 9,89  | 0,00333 | 0,66  | 1,58  | 0,07161 | NM_004438       | CBX5      |  |

|         |      |      |         |       |       |         |                 |           |
|---------|------|------|---------|-------|-------|---------|-----------------|-----------|
| 7963750 | 3,31 | 9,89 | 0,00435 | 3,84  | 14,36 | 0,02535 | NM_012117       | TNC       |
| 8163637 | 3,31 | 9,89 | 0,00137 | 2,07  | 4,21  | 0,01831 | NM_002160       | LOC400590 |
| 8006237 | 3,31 | 9,88 | 0,00051 | 2,25  | 4,77  | 0,00087 | ENST00000433145 | KIAA0776  |
| 8121161 | 3,30 | 9,87 | 0,00292 | 2,41  | 5,32  | 0,00090 | NM_015323       | PBX1      |
| 7906954 | 3,30 | 9,87 | 0,00078 | -0,04 | -1,03 | 0,90810 | NM_002585       | ABCE1     |
| 8097647 | 3,30 | 9,87 | 0,00182 | 4,19  | 18,22 | 0,00059 | NM_002940       | VPS41     |
| 8139165 | 3,30 | 9,87 | 0,01698 | 3,15  | 8,89  | 0,00015 | NM_014396       | PGM2      |
| 8094556 | 3,30 | 9,85 | 0,00528 | 3,89  | 14,85 | 0,00158 | NM_018290       | ZNF254    |
| 8027368 | 3,30 | 9,84 | 0,00188 | 2,70  | 6,50  | 0,00325 | NM_203282       | MEAF6     |
| 7914996 | 3,30 | 9,82 | 0,00984 | 3,56  | 11,78 | 0,00090 | NM_022756       | SNX2      |
| 8107613 | 3,30 | 9,82 | 0,00114 | 2,72  | 6,61  | 0,01162 | NM_003100       | RPL5      |
| 7986765 | 3,29 | 9,81 | 0,01522 | 2,25  | 4,74  | 0,01469 | NM_000969       | PMS2L5    |
| 8133531 | 3,29 | 9,81 | 0,00228 | 4,41  | 21,26 | 0,00003 | NR_027775       | ILK       |
| 7938154 | 3,29 | 9,80 | 0,00208 | 3,17  | 9,00  | 0,00010 | NM_004517       | C19orf42  |
| 8035193 | 3,29 | 9,80 | 0,01083 | 3,42  | 10,71 | 0,00417 | NM_024104       | ZNF518B   |
| 8099364 | 3,29 | 9,80 | 0,01286 | -1,21 | -2,31 | 0,01314 | NM_053042       | UBE2Z     |
| 8008139 | 3,29 | 9,80 | 0,00334 | 4,36  | 20,54 | 0,00138 | NM_023079       | ---       |
| 8042107 | 3,29 | 9,79 | 0,00465 | 3,88  | 14,74 | 0,00064 | ---             | SLFN11    |
| 8014233 | 3,29 | 9,79 | 0,00696 | 4,42  | 21,37 | 0,00054 | NM_001104587    | CACNA2D1  |
| 8140579 | 3,29 | 9,78 | 0,00580 | -0,27 | -1,21 | 0,46214 | NM_000722       | RPS28     |
| 8005471 | 3,29 | 9,77 | 0,03400 | 3,77  | 13,66 | 0,00004 | NM_001031       | DST       |
| 8127234 | 3,29 | 9,77 | 0,00026 | 1,91  | 3,76  | 0,04126 | NM_015548       | G3BP1     |
| 8109368 | 3,29 | 9,76 | 0,00590 | 3,86  | 14,48 | 0,00011 | NM_005754       | SLK       |
| 7930276 | 3,29 | 9,75 | 0,00213 | 2,92  | 7,55  | 0,08947 | NM_014720       | LRP6      |
| 7961339 | 3,29 | 9,75 | 0,00075 | 2,95  | 7,75  | 0,01216 | NM_002336       | KIFAP3    |
| 7922268 | 3,28 | 9,73 | 0,00264 | 3,39  | 10,45 | 0,00028 | NM_014970       | MAP1B     |
| 8106098 | 3,28 | 9,73 | 0,00284 | 2,28  | 4,84  | 0,00089 | NM_005909       | ARHGEF3   |
| 8088247 | 3,28 | 9,73 | 0,00026 | 1,39  | 2,63  | 0,00150 | NM_001128615    | PAPD5     |
| 7995479 | 3,28 | 9,72 | 0,00324 | 3,54  | 11,60 | 0,00430 | NM_001040284    | CCNB2     |
| 7983969 | 3,28 | 9,72 | 0,01289 | 4,10  | 17,11 | 0,00095 | NM_004701       | NHP2L1    |
| 8076374 | 3,28 | 9,72 | 0,00130 | 4,03  | 16,35 | 0,00042 | NM_005008       | HOXA9     |
| 8138749 | 3,28 | 9,71 | 0,00441 | -0,46 | -1,37 | 0,03931 | NM_152739       | ALKBH1    |
| 7980454 | 3,28 | 9,71 | 0,00286 | 2,14  | 4,41  | 0,00152 | NM_006020       | KLF3      |
| 8094599 | 3,28 | 9,70 | 0,00212 | 3,07  | 8,41  | 0,00006 | NM_016531       | ATXN2     |
| 7966397 | 3,28 | 9,69 | 0,00086 | 2,99  | 7,94  | 0,01590 | NM_002973       | TULP3     |
| 7953135 | 3,28 | 9,69 | 0,00002 | 3,81  | 14,02 | 0,00016 | NM_003324       | USP34     |
| 8052443 | 3,28 | 9,68 | 0,00085 | 3,48  | 11,13 | 0,01234 | NM_014709       | SGMS2     |
| 8096733 | 3,27 | 9,68 | 0,00612 | 1,68  | 3,20  | 0,02453 | NM_001136258    | ARHGAP21  |
| 7932554 | 3,27 | 9,68 | 0,00243 | 3,30  | 9,85  | 0,00077 | NM_020824       | PARP4     |
| 7970602 | 3,27 | 9,67 | 0,00195 | 3,15  | 8,91  | 0,03878 | NM_006437       | DDR2      |
| 7906900 | 3,27 | 9,66 | 0,01567 | -0,46 | -1,38 | 0,00191 | AY423733        | MBIP      |
| 7978666 | 3,27 | 9,65 | 0,00542 | 3,57  | 11,91 | 0,00206 | NM_016586       | MBD4      |
| 8090577 | 3,27 | 9,65 | 0,00075 | 2,30  | 4,91  | 0,00168 | NM_003925       | TPST1     |
| 8133155 | 3,27 | 9,65 | 0,00334 | 2,77  | 6,82  | 0,00072 | NM_003596       | PHF21A    |
| 7947624 | 3,27 | 9,64 | 0,00041 | 3,56  | 11,78 | 0,00406 | NM_001101802    | LPP       |
| 8084742 | 3,27 | 9,63 | 0,00243 | 2,94  | 7,66  | 0,00315 | NM_005578       | HBS1L     |
| 8129706 | 3,27 | 9,63 | 0,00968 | 3,61  | 12,19 | 0,00118 | NM_006620       | ANGPTL2   |
| 8164200 | 3,27 | 9,63 | 0,00311 | -1,60 | -3,03 | 0,00822 | NM_012098       | C22orf28  |
| 8075585 | 3,27 | 9,62 | 0,02077 | 4,23  | 18,82 | 0,00065 | NM_014306       | ---       |
| 8171846 | 3,26 | 9,60 | 0,01853 | 1,58  | 2,99  | 0,07086 | ---             | DUSP1     |
| 8115831 | 3,26 | 9,60 | 0,00761 | 4,24  | 18,90 | 0,00223 | NM_004417       | 10. Sep   |
| 8054467 | 3,26 | 9,60 | 0,00066 | 4,09  | 17,01 | 0,00077 | NM_144710       | SEC22B    |
| 7904695 | 3,26 | 9,60 | 0,00061 | 1,57  | 2,98  | 0,01115 | NM_004892       | ATF1      |
| 7955425 | 3,26 | 9,59 | 0,00469 | 3,21  | 9,22  | 0,00164 | NM_005171       | NFIA      |
| 7901788 | 3,26 | 9,59 | 0,02212 | 3,66  | 12,63 | 0,00415 | NM_001134673    | SUCLA2    |
| 7971541 | 3,26 | 9,58 | 0,02350 | 3,75  | 13,42 | 0,02004 | NM_003850       | TALDO1    |
| 7937465 | 3,26 | 9,57 | 0,00048 | 1,94  | 3,83  | 0,01270 | NM_006755       | PEBP1     |
| 7959070 | 3,26 | 9,56 | 0,00118 | 3,57  | 11,84 | 0,00057 | NM_002567       | NDRG3     |
| 8066051 | 3,26 | 9,55 | 0,00635 | 4,52  | 22,89 | 0,00003 | NM_032013       | MAP4K5    |
| 7978997 | 3,25 | 9,54 | 0,00254 | 3,67  | 12,77 | 0,00092 | NM_198794       | CSDA      |
| 7961230 | 3,25 | 9,54 | 0,00617 | 3,07  | 8,42  | 0,00023 | NM_003651       | PTPLAD1   |
| 7984263 | 3,25 | 9,54 | 0,00761 | 4,45  | 21,81 | 0,00037 | NM_016395       | DDX1      |
| 8040386 | 3,25 | 9,53 | 0,00361 | 3,75  | 13,49 | 0,00000 | NM_004939       | ---       |
| 8139889 | 3,25 | 9,53 | 0,00057 | 2,49  | 5,63  | 0,00026 | ---             | MYH10     |
| 8012475 | 3,25 | 9,52 | 0,00973 | 3,24  | 9,48  | 0,00284 | NM_005964       | NCEH1     |
| 8092177 | 3,25 | 9,52 | 0,00483 | 4,09  | 17,08 | 0,00079 | NM_001146276    | ZFP106    |
| 7987892 | 3,25 | 9,52 | 0,00130 | 3,32  | 9,97  | 0,00213 | NM_022473       | XRCC6     |
| 8073457 | 3,25 | 9,50 | 0,00906 | 1,61  | 3,06  | 0,04230 | NM_001469       | RPF2      |
| 8062211 | 3,25 | 9,50 | 0,00166 | 3,79  | 13,81 | 0,00043 | NM_032194       | RPL6      |
| 8022170 | 3,25 | 9,49 | 0,03582 | 2,42  | 5,33  | 0,00026 | NM_001024662    | SPAG9     |
| 8016745 | 3,25 | 9,48 | 0,00238 | 2,45  | 5,48  | 0,03188 | NM_001130528    | GULP1     |
| 8046906 | 3,25 | 9,48 | 0,02431 | 2,43  | 5,41  | 0,02804 | NM_016315       | EIF4B     |
| 7955646 | 3,24 | 9,48 | 0,00440 | 2,95  | 7,70  | 0,00029 | NM_001417       | PPARG     |

|         |      |      |         |       |       |         |                 |              |
|---------|------|------|---------|-------|-------|---------|-----------------|--------------|
| 8077899 | 3,24 | 9,47 | 0,00077 | 2,69  | 6,43  | 0,00164 | NM_138712       | FAM73A       |
| 7902476 | 3,24 | 9,47 | 0,00051 | 3,14  | 8,79  | 0,00006 | BX537792 ZNF680 |              |
| 8139820 | 3,24 | 9,47 | 0,00243 | 3,16  | 8,95  | 0,00415 | NM_178558       | TBL1XR1      |
| 8092201 | 3,24 | 9,46 | 0,00709 | 4,29  | 19,61 | 0,00137 | NM_024665       | SPIRE1       |
| 8022356 | 3,24 | 9,46 | 0,00740 | 4,09  | 17,08 | 0,00104 | NM_001128626    | COX6A1       |
| 7959153 | 3,24 | 9,46 | 0,00222 | 3,66  | 12,61 | 0,00002 | NM_004373       | PRDX6        |
| 7907439 | 3,24 | 9,45 | 0,01766 | 3,15  | 8,87  | 0,00049 | NM_004905       | RSPRY1       |
| 7995994 | 3,24 | 9,45 | 0,00539 | 3,03  | 8,18  | 0,00086 | NM_133368       | ZNF148       |
| 8090237 | 3,24 | 9,42 | 0,00072 | 2,54  | 5,81  | 0,01118 | NM_021964       | RPAIN        |
| 8004133 | 3,24 | 9,42 | 0,00631 | 3,85  | 14,40 | 0,00008 | NR_027680       | FRY          |
| 7968417 | 3,23 | 9,41 | 0,00097 | 0,38  | 1,30  | 0,02157 | NM_023037       | SAV1         |
| 7979033 | 3,23 | 9,41 | 0,00024 | 3,60  | 12,16 | 0,00672 | NM_021818       | RAF1         |
| 8085374 | 3,23 | 9,41 | 0,01468 | 4,67  | 25,54 | 0,00001 | NM_002880       | YWHAQ        |
| 8050215 | 3,23 | 9,40 | 0,00619 | 2,08  | 4,22  | 0,10544 | NM_006826       | NIP7         |
| 7996934 | 3,23 | 9,40 | 0,00007 | 3,09  | 8,53  | 0,00149 | NM_016101       | NAA50        |
| 8089652 | 3,23 | 9,39 | 0,03880 | 3,94  | 15,30 | 0,00018 | NM_025146       | PRDX4        |
| 8166455 | 3,23 | 9,39 | 0,00019 | 1,60  | 3,03  | 0,01027 | NM_006406       | NBAS         |
| 8050367 | 3,23 | 9,39 | 0,00089 | 2,52  | 5,75  | 0,00375 | NM_015909       | LOC100287552 |
| 8136177 | 3,23 | 9,39 | 0,01159 | 3,27  | 9,66  | 0,00275 | AF277177 EIF3A  |              |
| 7936614 | 3,23 | 9,39 | 0,00119 | 2,85  | 7,19  | 0,09185 | NM_003750       | RPLP0        |
| 7966996 | 3,23 | 9,39 | 0,05379 | 3,53  | 11,54 | 0,00899 | NM_053275       | EIF3K        |
| 8028514 | 3,23 | 9,38 | 0,00068 | 4,05  | 16,57 | 0,00004 | NM_013234       | ADNP         |
| 8067011 | 3,23 | 9,38 | 0,00069 | 3,13  | 8,76  | 0,01045 | NM_015339       | FRG1         |
| 8161509 | 3,23 | 9,37 | 0,00017 | 2,44  | 5,41  | 0,00649 | NM_004477       | DCAF12       |
| 8160756 | 3,23 | 9,37 | 0,00527 | 3,73  | 13,30 | 0,00001 | NM_015397       | CAPZA1       |
| 7904036 | 3,23 | 9,37 | 0,00130 | 1,81  | 3,50  | 0,03961 | NM_006135       | BCL7B        |
| 8140061 | 3,23 | 9,36 | 0,00006 | 4,48  | 22,26 | 0,00003 | NM_001707       | MYO1B        |
| 8047127 | 3,22 | 9,34 | 0,00330 | 3,25  | 9,51  | 0,00025 | NM_001130158    | PTPN13       |
| 8096176 | 3,22 | 9,34 | 0,00037 | 2,14  | 4,42  | 0,00176 | NM_080683       | EIF4H        |
| 8138773 | 3,22 | 9,34 | 0,00484 | 3,23  | 9,37  | 0,00279 | NM_022170       | JMY          |
| 8106516 | 3,22 | 9,34 | 0,00051 | 3,83  | 14,23 | 0,00175 | NM_152405       | RPS17        |
| 7990916 | 3,22 | 9,33 | 0,00375 | 3,24  | 9,42  | 0,02522 | NM_001021       | RPS17        |
| 7990965 | 3,22 | 9,33 | 0,00375 | 3,24  | 9,42  | 0,02522 | NM_001021       | IRF1         |
| 8114010 | 3,22 | 9,33 | 0,00258 | 2,88  | 7,39  | 0,00014 | NM_002198       | IFI16        |
| 7906400 | 3,22 | 9,33 | 0,00334 | 1,07  | 2,10  | 0,03454 | NM_005531       | BRE          |
| 8041031 | 3,22 | 9,32 | 0,00013 | 2,70  | 6,49  | 0,01153 | NM_199193       | PRR13        |
| 8036808 | 3,22 | 9,32 | 0,00089 | 2,64  | 6,24  | 0,00421 | NM_018457       | TM9SF4       |
| 8061685 | 3,22 | 9,31 | 0,00104 | 2,93  | 7,60  | 0,00090 | NM_014742       | SNAP23       |
| 7983111 | 3,22 | 9,30 | 0,01418 | 3,91  | 15,02 | 0,00278 | NM_003825       | RPL6         |
| 7966534 | 3,22 | 9,30 | 0,03669 | 2,32  | 4,99  | 0,00039 | NM_001024662    | THUMPD3      |
| 8077513 | 3,22 | 9,30 | 0,00432 | 3,43  | 10,78 | 0,00051 | NM_015453       | MTFR1        |
| 8146649 | 3,22 | 9,29 | 0,00300 | 4,22  | 18,62 | 0,00026 | NM_014637       | ME1          |
| 8127854 | 3,22 | 9,29 | 0,01170 | 4,40  | 21,07 | 0,00010 | NM_002395       | SFRS11       |
| 7902269 | 3,22 | 9,29 | 0,00362 | 2,82  | 7,05  | 0,03006 | NM_004768       | PTEN         |
| 7928959 | 3,21 | 9,28 | 0,00660 | 1,06  | 2,08  | 0,12229 | NM_000314       | RPS10        |
| 8125835 | 3,21 | 9,28 | 0,00291 | 1,61  | 3,04  | 0,08484 | NM_001014       | HEBP1        |
| 7961390 | 3,21 | 9,28 | 0,00860 | 2,81  | 7,03  | 0,00017 | NM_015987       | FST          |
| 8105302 | 3,21 | 9,27 | 0,01007 | 0,06  | 1,04  | 0,88054 | NM_006350       | ANXA4        |
| 8042468 | 3,21 | 9,27 | 0,00272 | 3,63  | 12,35 | 0,00003 | NM_001153       | MAML2        |
| 7951133 | 3,21 | 9,27 | 0,00474 | 0,72  | 1,64  | 0,04439 | NM_032427       | LRIG3        |
| 7964602 | 3,21 | 9,27 | 0,00480 | 3,07  | 8,39  | 0,00110 | NM_153377       | SLC41A2      |
| 7965964 | 3,21 | 9,27 | 0,00642 | 3,62  | 12,26 | 0,00009 | NM_032148       | IGF2BP3      |
| 8131860 | 3,21 | 9,26 | 0,00271 | 3,26  | 9,61  | 0,00439 | NM_006547       | ZC3H7A       |
| 7999496 | 3,21 | 9,26 | 0,00010 | 3,32  | 9,98  | 0,00078 | NM_014153       | ZNF117       |
| 8139832 | 3,21 | 9,26 | 0,00051 | 1,51  | 2,84  | 0,04889 | NM_015852       | AK3          |
| 8159945 | 3,21 | 9,26 | 0,00260 | 2,87  | 7,32  | 0,00003 | NM_016282       | RAB11FIP2    |
| 7936567 | 3,21 | 9,25 | 0,00087 | 2,72  | 6,59  | 0,00373 | NM_014904       | BFAR         |
| 7993341 | 3,21 | 9,25 | 0,00127 | 3,31  | 9,90  | 0,00034 | NM_016561       | EEF1A1       |
| 8138531 | 3,21 | 9,25 | 0,03098 | 1,25  | 2,38  | 0,01140 | NM_001402       | RPL34        |
| 8035829 | 3,21 | 9,25 | 0,01303 | 3,45  | 10,90 | 0,00210 | NM_000995       | HLA-G        |
| 8177725 | 3,21 | 9,25 | 0,04407 | 3,24  | 9,47  | 0,00481 | NM_002127       | HLA-G        |
| 8179034 | 3,21 | 9,25 | 0,04407 | 3,24  | 9,47  | 0,00481 | NM_002127       | ERC1         |
| 7952988 | 3,21 | 9,25 | 0,00198 | 3,58  | 11,93 | 0,00122 | NR_027948       | PTBP1        |
| 8024019 | 3,21 | 9,24 | 0,00598 | 4,23  | 18,73 | 0,00009 | NM_002819       | EIF2AK4      |
| 7982620 | 3,21 | 9,24 | 0,00280 | 4,16  | 17,84 | 0,00008 | NM_001013703    | STAR5        |
| 7990839 | 3,21 | 9,24 | 0,01222 | 2,65  | 6,26  | 0,00485 | NM_181900       | GTF2A1       |
| 7980523 | 3,21 | 9,23 | 0,00504 | 2,79  | 6,91  | 0,00250 | NM_015859       | VPS4B        |
| 8023672 | 3,21 | 9,23 | 0,00074 | 1,70  | 3,24  | 0,00482 | NM_004869       | TCF4         |
| 8023415 | 3,21 | 9,23 | 0,00662 | -0,77 | -1,71 | 0,02144 | NM_001083962    | FAS          |
| 7929032 | 3,21 | 9,22 | 0,00008 | 0,93  | 1,90  | 0,05230 | NM_000043       | ZFR          |
| 8111360 | 3,20 | 9,21 | 0,01302 | 4,21  | 18,51 | 0,00040 | NM_016107       | CCPG1        |
| 7989037 | 3,20 | 9,20 | 0,00453 | 2,46  | 5,50  | 0,00069 | NM_004748       | ROD1         |
| 8163402 | 3,20 | 9,20 | 0,00474 | 3,52  | 11,46 | 0,00612 | NM_005156       | RARS2        |



|         |      |      |         |       |       |         |                |           |
|---------|------|------|---------|-------|-------|---------|----------------|-----------|
| 8128013 | 3,20 | 9,19 | 0,00060 | 2,13  | 4,38  | 0,00967 | NM_020320      | COMMD1    |
| 8042207 | 3,20 | 9,19 | 0,00085 | 1,90  | 3,73  | 0,01826 | NM_152516      | RNF114    |
| 8063369 | 3,20 | 9,19 | 0,00143 | 4,72  | 26,32 | 0,00009 | NM_018683      | VCL       |
| 7928444 | 3,20 | 9,18 | 0,00364 | 2,86  | 7,26  | 0,00008 | NM_014000      | MAPK6     |
| 7983763 | 3,20 | 9,18 | 0,02936 | 3,98  | 15,83 | 0,00095 | NM_002748      | WASL      |
| 8142671 | 3,20 | 9,18 | 0,00142 | 3,16  | 8,93  | 0,00145 | NM_003941      | PDGFD     |
| 7951351 | 3,20 | 9,18 | 0,00649 | 1,37  | 2,58  | 0,00538 | NM_025208      | PION      |
| 8140478 | 3,20 | 9,17 | 0,00268 | 3,08  | 8,48  | 0,00358 | NM_017439      | MYL9      |
| 8062312 | 3,20 | 9,17 | 0,00005 | 1,00  | 2,00  | 0,01851 | NM_006097      | LAMA2     |
| 8121949 | 3,20 | 9,17 | 0,00225 | 0,00  | 1,00  | 0,98559 | NM_000426      | PTTG1IP   |
| 8070819 | 3,20 | 9,16 | 0,01843 | 4,07  | 16,77 | 0,00100 | NM_004339      | C6orf211  |
| 8122818 | 3,20 | 9,16 | 0,00038 | 1,77  | 3,41  | 0,04527 | BC011348 CUL4B |           |
| 8174794 | 3,20 | 9,16 | 0,00202 | 1,90  | 3,74  | 0,01725 | NM_001079872   | C12orf32  |
| 7953130 | 3,20 | 9,16 | 0,00124 | 3,11  | 8,66  | 0,00369 | NR_027363      | C14orf126 |
| 7978527 | 3,19 | 9,16 | 0,00029 | 2,99  | 7,95  | 0,00262 | NM_080664      | PGAM1     |
| 7965480 | 3,19 | 9,16 | 0,01018 | 4,09  | 16,98 | 0,00002 | NM_002629      | KPNA1     |
| 8089999 | 3,19 | 9,15 | 0,00236 | 3,92  | 15,11 | 0,00045 | NR_026698      | C4orf41   |
| 8098512 | 3,19 | 9,15 | 0,00250 | 2,51  | 5,71  | 0,00597 | NM_021942      | PHB2      |
| 7960716 | 3,19 | 9,15 | 0,00987 | 3,51  | 11,36 | 0,00154 | NM_001144831   | SRPX2     |
| 8168749 | 3,19 | 9,15 | 0,00920 | -0,37 | -1,29 | 0,15793 | NM_014467      | THAP1     |
| 8150559 | 3,19 | 9,15 | 0,00192 | 2,19  | 4,57  | 0,00219 | NM_018105      | RASA1     |
| 8106784 | 3,19 | 9,13 | 0,00092 | 4,04  | 16,42 | 0,00009 | NM_002890      | RP55      |
| 8031933 | 3,19 | 9,13 | 0,00329 | 3,57  | 11,89 | 0,00016 | NM_001009      | CDK7      |
| 8105862 | 3,19 | 9,12 | 0,00071 | 1,59  | 3,01  | 0,00977 | NM_001799      | CDK7      |
| 8177462 | 3,19 | 9,12 | 0,00071 | 1,59  | 3,01  | 0,00977 | NM_001799      | TAB3      |
| 8171901 | 3,19 | 9,11 | 0,00019 | 3,27  | 9,64  | 0,00115 | NM_152787      | DCAF10    |
| 8155312 | 3,19 | 9,11 | 0,00144 | 3,85  | 14,46 | 0,00040 | NM_024345      | CCNY      |
| 7927008 | 3,19 | 9,11 | 0,00015 | 2,20  | 4,59  | 0,00098 | NM_181698      | C14orf118 |
| 7975863 | 3,18 | 9,09 | 0,01628 | 4,00  | 16,01 | 0,00041 | NM_017926      | SRPK1     |
| 8125941 | 3,18 | 9,09 | 0,00570 | 3,68  | 12,80 | 0,00054 | NM_003137      | PRKRIR    |
| 7950544 | 3,18 | 9,08 | 0,00123 | 3,25  | 9,49  | 0,00263 | NM_004705      | CDC26     |
| 8142878 | 3,18 | 9,08 | 0,00014 | 1,45  | 2,73  | 0,04804 | NM_139286      | C15orf24  |
| 7987172 | 3,18 | 9,08 | 0,00391 | 3,80  | 13,90 | 0,00004 | NM_020154      | HLA-A     |
| 8177732 | 3,18 | 9,08 | 0,00570 | 3,57  | 11,87 | 0,00264 | NM_002116      | RAB18     |
| 7926836 | 3,18 | 9,07 | 0,00423 | 3,84  | 14,28 | 0,00013 | NM_021252      | HPRT1     |
| 8169984 | 3,18 | 9,07 | 0,01033 | 3,12  | 8,71  | 0,00135 | NM_000194      | C16orf63  |
| 7999718 | 3,18 | 9,07 | 0,00041 | 3,25  | 9,48  | 0,00063 | NM_144600      | RYK       |
| 8090840 | 3,18 | 9,07 | 0,00133 | 3,27  | 9,64  | 0,00431 | NM_001005861   | TMEM183B  |
| 8091452 | 3,18 | 9,07 | 0,00602 | 3,42  | 10,72 | 0,00040 | NM_001079809   | GLT8D1    |
| 8087985 | 3,18 | 9,07 | 0,00106 | 3,62  | 12,28 | 0,00098 | NM_001010983   | ESD       |
| 7971513 | 3,18 | 9,07 | 0,00484 | 3,22  | 9,33  | 0,00037 | NM_001984      | TSPAN3    |
| 7990620 | 3,18 | 9,06 | 0,00089 | 3,87  | 14,61 | 0,00124 | NM_005724      | TSC22D1   |
| 7971350 | 3,18 | 9,06 | 0,00329 | 3,06  | 8,33  | 0,00002 | NM_183422      | CLNS1A    |
| 7950597 | 3,18 | 9,04 | 0,00217 | 4,65  | 25,08 | 0,00071 | NM_001293      | DLD       |
| 8135464 | 3,18 | 9,03 | 0,00858 | 3,09  | 8,50  | 0,00362 | NM_000108      | DHX8      |
| 8007505 | 3,17 | 9,02 | 0,00075 | 2,80  | 6,96  | 0,00206 | NM_004941      | COX6B1    |
| 8027932 | 3,17 | 9,02 | 0,00072 | 3,77  | 13,66 | 0,00003 | NM_001863      | DHX15     |
| 8099649 | 3,17 | 9,01 | 0,00405 | 3,36  | 10,25 | 0,00300 | NM_001358      | TMEM194A  |
| 7964347 | 3,17 | 9,01 | 0,00166 | 4,14  | 17,65 | 0,00008 | NM_001130963   | USP22     |
| 8013486 | 3,17 | 9,01 | 0,00127 | 2,58  | 5,96  | 0,00052 | NM_015276      | FECH      |
| 8023466 | 3,17 | 9,01 | 0,00168 | 2,87  | 7,30  | 0,00154 | NM_001012515   | ALG3      |
| 8092457 | 3,17 | 9,00 | 0,00571 | 4,42  | 21,35 | 0,00059 | NM_005787      | SECISBP2  |
| 8156295 | 3,17 | 8,99 | 0,00524 | 3,10  | 8,57  | 0,00309 | NM_024077      | LMAN2     |
| 8116020 | 3,17 | 8,99 | 0,00303 | 4,28  | 19,38 | 0,00001 | NM_006816      | FAM35B    |
| 7927267 | 3,17 | 8,99 | 0,00069 | 2,42  | 5,35  | 0,00222 | NR_027632      | FOXJ3     |
| 7915408 | 3,17 | 8,99 | 0,00190 | 2,62  | 6,14  | 0,02761 | NM_014947      | TGFBR1    |
| 8156826 | 3,17 | 8,99 | 0,00189 | 1,97  | 3,92  | 0,00479 | NM_004612      | RAB5A     |
| 8078214 | 3,17 | 8,97 | 0,00017 | 2,36  | 5,14  | 0,00168 | NM_004162      | ECD       |
| 7934301 | 3,17 | 8,97 | 0,00330 | 2,96  | 7,79  | 0,00049 | NM_007265      | RNF14     |
| 8108847 | 3,16 | 8,97 | 0,01203 | 3,09  | 8,54  | 0,00095 | NM_183401      | EEF1A1    |
| 8158952 | 3,16 | 8,97 | 0,04783 | 1,30  | 2,47  | 0,01300 | NM_001402      | C14orf101 |
| 7974542 | 3,16 | 8,97 | 0,01037 | 3,53  | 11,58 | 0,00128 | NM_017799      | ADD3      |
| 7930380 | 3,16 | 8,96 | 0,00130 | 2,65  | 6,28  | 0,00016 | NM_016824      | MLLT10    |
| 7926565 | 3,16 | 8,94 | 0,00510 | 3,69  | 12,87 | 0,00012 | NM_004641      | CBFB      |
| 7996393 | 3,16 | 8,94 | 0,00069 | 3,63  | 12,35 | 0,00000 | NM_001755      | RYBP      |
| 8088820 | 3,16 | 8,94 | 0,00095 | 2,44  | 5,43  | 0,00002 | NM_012234      | ODC1      |
| 8050240 | 3,16 | 8,94 | 0,00273 | 4,60  | 24,30 | 0,00040 | NM_002539      | PPP1R10   |
| 8124756 | 3,16 | 8,93 | 0,00121 | 2,49  | 5,63  | 0,05988 | NM_002714      | PPP1R10   |
| 8178358 | 3,16 | 8,93 | 0,00121 | 2,49  | 5,63  | 0,05988 | NM_002714      | PPP1R10   |
| 8179664 | 3,16 | 8,93 | 0,00121 | 2,49  | 5,63  | 0,05988 | NM_002714      | GSR       |
| 8150112 | 3,16 | 8,91 | 0,00630 | 4,88  | 29,44 | 0,00004 | NM_000637      | LSM12     |
| 8015908 | 3,15 | 8,91 | 0,00226 | 4,17  | 17,98 | 0,00035 | NM_152344      | EXOSC2    |
| 8158714 | 3,15 | 8,89 | 0,05198 | 5,18  | 36,31 | 0,00030 | NM_014285      | PIGB      |

|         |      |      |         |       |       |         |                 |          |
|---------|------|------|---------|-------|-------|---------|-----------------|----------|
| 7983811 | 3,15 | 8,89 | 0,00753 | 5,35  | 40,92 | 0,00002 | NM_004855       | BTF3L4   |
| 7901418 | 3,15 | 8,88 | 0,00911 | 4,38  | 20,88 | 0,00001 | NM_152265       | TPP1     |
| 7946228 | 3,15 | 8,88 | 0,00113 | 2,74  | 6,70  | 0,00266 | NM_000391       | C2orf28  |
| 8040831 | 3,15 | 8,88 | 0,00064 | 2,46  | 5,51  | 0,00105 | NM_080592       | ATP6V1F  |
| 8136039 | 3,15 | 8,87 | 0,00092 | 2,97  | 7,81  | 0,00175 | NM_004231       | YES1     |
| 8021984 | 3,15 | 8,87 | 0,01155 | 1,87  | 3,65  | 0,00204 | NM_005433       | C16orf61 |
| 8002987 | 3,15 | 8,86 | 0,04885 | 5,13  | 35,04 | 0,00007 | NM_020188       | ADH1B    |
| 8101881 | 3,15 | 8,86 | 0,00909 | -0,95 | -1,94 | 0,01556 | NM_000668       | TWF2     |
| 8087860 | 3,15 | 8,85 | 0,00614 | 3,60  | 12,11 | 0,00013 | NM_007284       | NUCKS1   |
| 7923798 | 3,14 | 8,84 | 0,00081 | 2,29  | 4,87  | 0,01082 | NM_022731       | EXT1     |
| 8152491 | 3,14 | 8,83 | 0,00712 | 3,44  | 10,88 | 0,00019 | NM_000127       | MAN1A2   |
| 7904340 | 3,14 | 8,83 | 0,00240 | 2,96  | 7,76  | 0,00031 | NM_006699       | AHSA1    |
| 7975976 | 3,14 | 8,82 | 0,00071 | 2,55  | 5,84  | 0,00035 | NM_012111       | PPP2CB   |
| 8150126 | 3,14 | 8,82 | 0,00154 | 3,53  | 11,51 | 0,00162 | NM_001009552    | UQCRC2   |
| 7993872 | 3,14 | 8,82 | 0,00226 | 3,65  | 12,55 | 0,00441 | NM_003366       | TBPL1    |
| 8122182 | 3,14 | 8,82 | 0,01067 | 2,27  | 4,82  | 0,01977 | NM_004865       | REST     |
| 8095262 | 3,14 | 8,81 | 0,00009 | 2,06  | 4,17  | 0,00912 | NM_005612       | CHD9     |
| 7995583 | 3,14 | 8,81 | 0,00198 | 2,43  | 5,40  | 0,00342 | NM_025134       | MEIS1    |
| 8042356 | 3,14 | 8,81 | 0,00263 | -0,63 | -1,54 | 0,21696 | NM_002398       | ACVR2A   |
| 8045587 | 3,14 | 8,81 | 0,03053 | 2,18  | 4,53  | 0,00061 | NM_001616       | PLDN     |
| 7983502 | 3,14 | 8,80 | 0,00141 | 3,17  | 8,97  | 0,00268 | NM_012388       | GOLGA4   |
| 8078569 | 3,14 | 8,80 | 0,00111 | 1,99  | 3,98  | 0,02318 | NM_002078       | C3orf1   |
| 8081867 | 3,14 | 8,80 | 0,03739 | 5,56  | 47,04 | 0,00002 | NM_016589       | CALCOCO2 |
| 8008113 | 3,14 | 8,79 | 0,00027 | 2,92  | 7,59  | 0,00007 | NM_005831       | ALS2CR4  |
| 8058258 | 3,14 | 8,79 | 0,00543 | 2,90  | 7,47  | 0,00790 | NM_152388       | PLAUR    |
| 8037374 | 3,14 | 8,79 | 0,00556 | 4,26  | 19,14 | 0,00012 | NM_002659       | CCDC91   |
| 7954613 | 3,13 | 8,78 | 0,00104 | 2,04  | 4,12  | 0,00556 | NM_018318       | ZDHC2    |
| 8144758 | 3,13 | 8,77 | 0,00577 | 3,01  | 8,03  | 0,00043 | NM_016353       | KIAA2018 |
| 8089647 | 3,13 | 8,76 | 0,00370 | 2,64  | 6,25  | 0,00301 | NM_001009899    | PPP2R1A  |
| 8030881 | 3,13 | 8,76 | 0,00116 | 3,16  | 8,95  | 0,00026 | NM_014225       | SNRPE    |
| 8160033 | 3,13 | 8,76 | 0,00012 | 4,21  | 18,55 | 0,00017 | NM_003094       | USP30    |
| 7958439 | 3,13 | 8,75 | 0,00462 | 3,37  | 10,33 | 0,00235 | NM_032663       | FAM175B  |
| 7931216 | 3,13 | 8,75 | 0,00115 | 2,96  | 7,77  | 0,00145 | NM_032182       | BTRC     |
| 7929958 | 3,13 | 8,75 | 0,00042 | 2,57  | 5,95  | 0,00693 | NM_033637       | IGF2     |
| 7937772 | 3,13 | 8,73 | 0,00359 | -0,54 | -1,45 | 0,12548 | NM_000612       | SFXN1    |
| 8110090 | 3,13 | 8,73 | 0,00072 | 3,46  | 10,98 | 0,00002 | NM_022754       | OCLR     |
| 8169811 | 3,12 | 8,72 | 0,00209 | 4,01  | 16,06 | 0,00002 | NM_000276       | FAM3C    |
| 8142540 | 3,12 | 8,72 | 0,00241 | 3,31  | 9,90  | 0,00002 | NM_014888       | SERPINB1 |
| 8123598 | 3,12 | 8,72 | 0,00593 | 4,76  | 27,16 | 0,00000 | NM_030666       | LOXL2    |
| 8149774 | 3,12 | 8,71 | 0,00192 | 3,77  | 13,60 | 0,00111 | NM_002318       | CEPT1    |
| 7903908 | 3,12 | 8,71 | 0,00246 | 2,84  | 7,14  | 0,00141 | NM_006090       | DOCK11   |
| 8169541 | 3,12 | 8,71 | 0,00052 | 0,97  | 1,96  | 0,12552 | NM_144658       | LRP1     |
| 7956301 | 3,12 | 8,71 | 0,00205 | 2,81  | 7,03  | 0,00072 | NM_002332       | PPP2R1B  |
| 7951614 | 3,12 | 8,71 | 0,00692 | 2,83  | 7,10  | 0,00314 | NM_002716       | DNAUC1   |
| 7932512 | 3,12 | 8,70 | 0,00019 | 1,76  | 3,39  | 0,00910 | NM_022365       | SETX     |
| 8164701 | 3,12 | 8,70 | 0,00118 | 2,90  | 7,47  | 0,01936 | NM_015046       | ISOC1    |
| 8107814 | 3,12 | 8,70 | 0,01143 | 1,86  | 3,63  | 0,00304 | NM_016048       | TBCK     |
| 8102171 | 3,12 | 8,69 | 0,00596 | 3,68  | 12,82 | 0,00083 | NM_001163435    | MEST     |
| 8136248 | 3,12 | 8,69 | 0,00162 | 2,38  | 5,21  | 0,00020 | NM_002402       | ---      |
| 8000480 | 3,12 | 8,69 | 0,00069 | 0,50  | 1,42  | 0,29712 | ---             | NDUFA4   |
| 8128322 | 3,12 | 8,68 | 0,00033 | 2,64  | 6,23  | 0,01640 | NM_014165       | ZNF761   |
| 8030993 | 3,12 | 8,68 | 0,00039 | 1,78  | 3,44  | 0,01361 | NM_001008401    | MAP3K7   |
| 8128260 | 3,12 | 8,67 | 0,00268 | 2,43  | 5,39  | 0,01521 | NM_145331       | EIF5AL1  |
| 7928600 | 3,12 | 8,67 | 0,00290 | 3,72  | 13,17 | 0,00038 | NM_001099692    | ---      |
| 7916016 | 3,12 | 8,66 | 0,00190 | 0,08  | 1,06  | 0,89571 | ---             | LRRRC40  |
| 7916910 | 3,11 | 8,65 | 0,00091 | 2,78  | 6,86  | 0,00306 | NM_017768       | CHAC1    |
| 7982868 | 3,11 | 8,65 | 0,00027 | 3,72  | 13,20 | 0,00174 | NM_024111       | PRPF8    |
| 8011141 | 3,11 | 8,65 | 0,00057 | 3,88  | 14,69 | 0,00069 | NM_006445       | PDGFC    |
| 8103399 | 3,11 | 8,64 | 0,00167 | 0,28  | 1,21  | 0,27827 | NM_016205       | OPA1     |
| 8084844 | 3,11 | 8,64 | 0,00113 | 2,79  | 6,94  | 0,01636 | NM_130837       | NGDN     |
| 7973414 | 3,11 | 8,64 | 0,00001 | 3,65  | 12,53 | 0,00014 | NM_015514       | RPS27    |
| 7960359 | 3,11 | 8,63 | 0,00829 | 2,92  | 7,55  | 0,00326 | ENST00000447487 | POMP     |
| 7968297 | 3,11 | 8,63 | 0,00026 | 1,39  | 2,63  | 0,05513 | NM_015932       | PDCD6IP  |
| 8078479 | 3,11 | 8,61 | 0,00683 | 2,08  | 4,22  | 0,12615 | NM_013374       | AP3B1    |
| 8112772 | 3,11 | 8,61 | 0,00039 | 3,28  | 9,68  | 0,00275 | NM_003664       | NLK      |
| 8005814 | 3,11 | 8,61 | 0,01346 | 5,30  | 39,43 | 0,00087 | NM_016231       | PCTP     |
| 8008598 | 3,10 | 8,60 | 0,00853 | 3,50  | 11,33 | 0,00035 | NM_001102402    | SNRNP27  |
| 8042495 | 3,10 | 8,59 | 0,01509 | 3,24  | 9,47  | 0,00096 | NM_006857       | ZNF724P  |
| 8035838 | 3,10 | 8,57 | 0,01078 | 2,46  | 5,51  | 0,01402 | AK301230        | CLOCK    |
| 8100428 | 3,10 | 8,57 | 0,01381 | 3,56  | 11,82 | 0,00011 | NM_004898       | MAPKAPK5 |
| 7958800 | 3,10 | 8,57 | 0,00046 | 3,78  | 13,70 | 0,00024 | NM_003668       | FMOD     |
| 7923578 | 3,10 | 8,56 | 0,01037 | -1,53 | -2,89 | 0,00383 | NM_002023       | TFAM     |
| 7927669 | 3,10 | 8,56 | 0,00651 | 2,56  | 5,92  | 0,00252 | NM_003201       | SNX7     |

|         |      |      |         |       |       |         |              |          |
|---------|------|------|---------|-------|-------|---------|--------------|----------|
| 7903203 | 3,10 | 8,55 | 0,00012 | 1,43  | 2,70  | 0,00562 | NM_015976    | CCNDBP1  |
| 7983173 | 3,09 | 8,54 | 0,00823 | 2,89  | 7,43  | 0,00052 | NM_012142    | RIT1     |
| 7920839 | 3,09 | 8,54 | 0,00328 | 3,02  | 8,14  | 0,00028 | NM_006912    | P4HA1    |
| 7934278 | 3,09 | 8,54 | 0,00142 | 2,30  | 4,91  | 0,00188 | NM_000917    | FHL1     |
| 8170119 | 3,09 | 8,53 | 0,00324 | 2,78  | 6,87  | 0,00072 | NM_001159702 | CDS2     |
| 8060772 | 3,09 | 8,53 | 0,00284 | 3,15  | 8,88  | 0,00011 | NM_003818    | POM121   |
| 8133326 | 3,09 | 8,52 | 0,06560 | 5,01  | 32,14 | 0,00028 | NM_172020    | APOOL    |
| 8168580 | 3,09 | 8,52 | 0,00148 | 3,10  | 8,56  | 0,00217 | NM_198450    | C17orf63 |
| 8013776 | 3,09 | 8,51 | 0,01218 | 3,10  | 8,57  | 0,00015 | NM_018182    | PTGR1    |
| 8163328 | 3,09 | 8,49 | 0,00405 | 3,55  | 11,69 | 0,00065 | NM_001146108 | SNORD4B  |
| 8005957 | 3,09 | 8,49 | 0,02617 | 0,42  | 1,33  | 0,73747 | NR_000009    | TMEM165  |
| 8095148 | 3,09 | 8,49 | 0,00490 | 3,20  | 9,22  | 0,00001 | NM_018475    | HLA-DPA1 |
| 8125556 | 3,09 | 8,49 | 0,00125 | 1,37  | 2,59  | 0,00967 | NM_033554    | HLA-DPA1 |
| 8178891 | 3,09 | 8,49 | 0,00125 | 1,37  | 2,59  | 0,00967 | NM_033554    | NR2C2    |
| 8078091 | 3,09 | 8,49 | 0,00262 | 2,81  | 7,03  | 0,01464 | NM_003298    | GPX7     |
| 7901460 | 3,08 | 8,48 | 0,00939 | 2,32  | 5,00  | 0,00034 | NM_015696    | ZNF273   |
| 8133062 | 3,08 | 8,48 | 0,00070 | 3,08  | 8,45  | 0,00252 | NM_021148    | LAMP1    |
| 7970287 | 3,08 | 8,48 | 0,00364 | 1,69  | 3,22  | 0,00213 | NM_005561    | TOMM70A  |
| 8089128 | 3,08 | 8,48 | 0,00054 | 2,45  | 5,47  | 0,00041 | NM_014820    | TMEM87A  |
| 7987869 | 3,08 | 8,47 | 0,00715 | 3,62  | 12,29 | 0,00102 | NM_015497    | KRTAP1-5 |
| 8015179 | 3,08 | 8,47 | 0,00291 | -1,06 | -2,08 | 0,02614 | NM_031957    | KRTAP1-5 |
| 8019588 | 3,08 | 8,47 | 0,00291 | -1,06 | -2,08 | 0,02614 | NM_031957    | AGPS     |
| 8046604 | 3,08 | 8,46 | 0,00103 | 3,41  | 10,62 | 0,00106 | NM_003659    | HEATR1   |
| 7925364 | 3,08 | 8,46 | 0,00072 | 3,29  | 9,81  | 0,00464 | NM_018072    | HERC4    |
| 7933947 | 3,08 | 8,46 | 0,01842 | 3,75  | 13,43 | 0,00008 | NM_022079    | TSPAN31  |
| 7956613 | 3,08 | 8,45 | 0,01258 | 1,36  | 2,57  | 0,03109 | NM_005981    | CTSL1    |
| 8156228 | 3,08 | 8,45 | 0,00064 | 3,53  | 11,58 | 0,00383 | NM_001912    | C14orf1  |
| 7980309 | 3,08 | 8,45 | 0,00504 | 4,62  | 24,64 | 0,00005 | NM_007176    | USP3     |
| 7984132 | 3,08 | 8,44 | 0,00947 | 3,79  | 13,82 | 0,00043 | NM_006537    | STK17A   |
| 8132503 | 3,08 | 8,44 | 0,00069 | 3,12  | 8,67  | 0,00009 | NM_004760    | FNIP1    |
| 8113914 | 3,08 | 8,44 | 0,00767 | 3,24  | 9,48  | 0,00045 | NM_133372    | 08. Mrz  |
| 7933228 | 3,08 | 8,44 | 0,00215 | 2,93  | 7,60  | 0,00006 | NM_001002265 | RPL23A   |
| 8091806 | 3,08 | 8,43 | 0,03617 | 0,86  | 1,81  | 0,51905 | NM_000984    | LTBP1    |
| 8041383 | 3,08 | 8,43 | 0,00032 | 1,69  | 3,23  | 0,00104 | NM_206943    | PHACTR2  |
| 8122426 | 3,08 | 8,43 | 0,00212 | 1,66  | 3,16  | 0,02019 | NM_014721    | SNX3     |
| 8128683 | 3,08 | 8,43 | 0,00108 | 2,52  | 5,75  | 0,00293 | NM_003795    | MDH2     |
| 8133690 | 3,07 | 8,42 | 0,00355 | 3,57  | 11,86 | 0,00107 | NM_005918    | USP7     |
| 7999326 | 3,07 | 8,42 | 0,00061 | 3,50  | 11,30 | 0,02157 | NM_003470    | PDSS1    |
| 7926807 | 3,07 | 8,42 | 0,00288 | 4,04  | 16,42 | 0,00057 | NM_014317    | DUSP10   |
| 7924450 | 3,07 | 8,42 | 0,03670 | 1,96  | 3,90  | 0,00082 | NM_007207    | RAB3GAP1 |
| 8045398 | 3,07 | 8,42 | 0,01264 | 2,39  | 5,24  | 0,00023 | NM_001172435 | C1orf85  |
| 7920971 | 3,07 | 8,42 | 0,00925 | 5,03  | 32,73 | 0,00006 | NM_144580    | CY5B5    |
| 7996947 | 3,07 | 8,41 | 0,00327 | 3,88  | 14,68 | 0,00095 | NM_030579    | PHTF2    |
| 8133818 | 3,07 | 8,41 | 0,00638 | 1,96  | 3,89  | 0,00025 | NM_001127358 | TTL4     |
| 8048411 | 3,07 | 8,40 | 0,00101 | 3,48  | 11,19 | 0,00055 | NM_014640    | ANKRD17  |
| 8100902 | 3,07 | 8,40 | 0,00078 | 3,62  | 12,27 | 0,00008 | NM_032217    | ---      |
| 7960131 | 3,07 | 8,40 | 0,02174 | 1,76  | 3,39  | 0,02477 | ---          | ATXN3    |
| 7980940 | 3,07 | 8,40 | 0,00012 | 2,51  | 5,68  | 0,00049 | NR_028459    | MRPS23   |
| 8016870 | 3,07 | 8,39 | 0,00559 | 3,58  | 11,99 | 0,00019 | NM_016070    | SMAD4    |
| 8021228 | 3,07 | 8,39 | 0,02017 | 1,01  | 2,01  | 0,03735 | NM_005359    | SYNRG    |
| 8014551 | 3,07 | 8,39 | 0,01502 | 3,90  | 14,91 | 0,00003 | NM_007247    | CCT3     |
| 7920984 | 3,07 | 8,38 | 0,00252 | 3,73  | 13,30 | 0,00156 | NM_005998    | PCBD1    |
| 7934178 | 3,07 | 8,37 | 0,01153 | 3,91  | 15,04 | 0,00086 | NM_000281    | FRS2     |
| 7957043 | 3,07 | 8,37 | 0,00120 | 2,94  | 7,66  | 0,00154 | NM_006654    | RPL11    |
| 7898875 | 3,06 | 8,36 | 0,01449 | 1,39  | 2,61  | 0,31723 | NM_000975    | PLEKHB2  |
| 8045247 | 3,06 | 8,35 | 0,01086 | 3,06  | 8,34  | 0,00251 | NM_017958    | RAG1AP1  |
| 7905938 | 3,06 | 8,33 | 0,01613 | 5,72  | 52,70 | 0,00006 | NM_018845    | SNX12    |
| 8173430 | 3,06 | 8,33 | 0,00514 | 2,50  | 5,64  | 0,00664 | NM_013346    | C1orf43  |
| 7920492 | 3,06 | 8,33 | 0,01268 | 4,90  | 29,82 | 0,00017 | NM_001098616 | EXOSC1   |
| 7935462 | 3,06 | 8,32 | 0,00906 | 3,34  | 10,16 | 0,00044 | NM_016046    | MT2A     |
| 8095376 | 3,06 | 8,31 | 0,01456 | 2,19  | 4,57  | 0,00799 | NM_005953    | ZZZ3     |
| 7917103 | 3,05 | 8,31 | 0,00243 | 2,58  | 5,96  | 0,00654 | NM_015534    | TMEM39A  |
| 8089759 | 3,05 | 8,30 | 0,00319 | 4,15  | 17,74 | 0,00007 | NM_018266    | PGAM1    |
| 7958152 | 3,05 | 8,30 | 0,01199 | 3,76  | 13,57 | 0,00023 | NM_002629    | XPO4     |
| 7970473 | 3,05 | 8,29 | 0,00150 | 3,29  | 9,77  | 0,00052 | NM_022459    | GRINA    |
| 8148694 | 3,05 | 8,28 | 0,00179 | 2,45  | 5,48  | 0,00044 | NM_000837    | ROCK2    |
| 8050302 | 3,05 | 8,28 | 0,00024 | 3,21  | 9,28  | 0,00648 | NM_004850    | LYSMD3   |
| 8113064 | 3,05 | 8,28 | 0,00664 | 1,82  | 3,53  | 0,03160 | NM_198273    | M6PR     |
| 7960933 | 3,05 | 8,27 | 0,02315 | 4,98  | 31,57 | 0,00045 | NM_002355    | GAB1     |
| 8097586 | 3,05 | 8,27 | 0,00451 | 2,89  | 7,40  | 0,00052 | NM_207123    | ATXN7L1  |
| 8142096 | 3,05 | 8,27 | 0,01776 | 3,22  | 9,32  | 0,00252 | NM_020725    | UBE2E2   |
| 8078252 | 3,05 | 8,26 | 0,00774 | 4,00  | 16,02 | 0,00009 | NM_152653    | 03. Mrz  |
| 8113790 | 3,05 | 8,26 | 0,01290 | 2,36  | 5,14  | 0,00800 | NM_178450    | KIAA1107 |

|         |      |         |         |       |       |         |              |                           |
|---------|------|---------|---------|-------|-------|---------|--------------|---------------------------|
| 7902977 | 3,04 | 8,25    | 0,00159 | 1,49  | 2,80  | 0,05165 | NM_015237    | ACTR3                     |
| 8044686 | 3,04 | 8,25    | 0,00555 | 3,11  | 8,64  | 0,00074 | NM_005721    | CDKN1B                    |
| 7954029 | 3,04 | 8,24    | 0,00057 | 3,06  | 8,36  | 0,00200 | NM_004064    | KIT                       |
| 8095110 | 3,04 | 8,24    | 0,01213 | -0,64 | -1,56 | 0,09967 | NM_000222    | ZNF280C                   |
| 8175076 | 3,04 | 8,24    | 0,00316 | 3,90  | 14,92 | 0,00071 | NM_017666    | SLC4A4                    |
| 8095585 | 3,04 | 8,24    | 0,00176 | 2,42  | 5,36  | 0,00552 | NM_001098484 | DNAJC11                   |
| 7912112 | 3,04 | 8,23    | 0,00520 | 2,47  | 5,56  | 0,00609 | NM_018198    | PSMC6                     |
| 8150870 | 3,04 | 8,23    | 0,00717 | 3,31  | 9,89  | 0,00450 | NM_002806    | ---                       |
| 8121212 | 3,04 | 8,23    | 0,00049 | 2,39  | 5,25  | 0,01286 | ---          | BBX                       |
| 8081465 | 3,04 | 8,22    | 0,00530 | 2,94  | 7,66  | 0,00452 | NM_001142568 | PMS2L2                    |
| 8140280 | 3,04 | 8,22    | 0,00270 | 4,05  | 16,58 | 0,00007 | NR_003614    | SLC44A2                   |
| 8025672 | 3,04 | 8,22    | 0,00022 | 3,66  | 12,64 | 0,00028 | NM_020428    | ARID2                     |
| 7955019 | 3,04 | 8,22    | 0,00067 | 3,56  | 11,76 | 0,00348 | NM_152641    | PRICKLE1                  |
| 7962375 | 3,04 | 8,21    | 0,00035 | 2,75  | 6,73  | 0,00062 | NM_153026    | PGAM4                     |
| 8173729 | 3,04 | 8,21    | 0,01138 | 3,32  | 9,98  | 0,00021 | NM_001029891 | PGAM4                     |
| 8176282 | 3,04 | 8,21    | 0,01138 | 3,32  | 9,98  | 0,00021 | NM_001029891 | GPR107                    |
| 8158597 | 3,04 | 8,21    | 0,00210 | 3,89  | 14,88 | 0,00006 | NM_001136557 | GMFB                      |
| 7979260 | 3,04 | 8,20    | 0,00259 | 1,97  | 3,93  | 0,00531 | NM_004124    | RGPD6                     |
| 8044304 | 3,04 | 8,20    | 0,00091 | 2,05  | 4,15  | 0,03813 | NM_001123363 | 07_Sep                    |
| 8132292 | 3,03 | 8,19    | 0,00010 | 1,43  | 2,70  | 0,02380 | NM_001788    | SPG21                     |
| 7989696 | 3,03 | 8,19    | 0,00015 | 3,76  | 13,53 | 0,00001 | NM_001127889 | CNN1                      |
| 8025918 | 3,03 | 8,19    | 0,00442 | -1,29 | -2,45 | 0,02055 | NM_001299    | NSDHL                     |
| 8170590 | 3,03 | 8,18    | 0,02002 | 3,27  | 9,65  | 0,00020 | NM_015922    | RGPD3                     |
| 8054414 | 3,03 | 8,18    | 0,00351 | 1,84  | 3,58  | 0,04623 | NM_001144013 | CNOT6                     |
| 8110589 | 3,03 | 8,17    | 0,00175 | 2,88  | 7,37  | 0,00237 | NM_015455    | MARS                      |
| 7956443 | 3,03 | 8,16    | 0,00565 | 3,57  | 11,84 | 0,00001 | NM_004990    | ZNF528                    |
| 8030931 | 3,03 | 8,16    | 0,00130 | 1,96  | 3,88  | 0,01697 | NM_032423    | MEIS2                     |
| 7987385 | 3,03 | 8,15    | 0,00088 | 1,73  | 3,33  | 0,00073 | NM_172316    | ACP1                      |
| 8039961 | 3,03 | 8,15    | 0,02002 | 3,72  | 13,18 | 0,00436 | NR_024080    | C4orf46                   |
| 7991777 | 3,03 | 8,14    | 0,00369 | 2,72  | 6,58  | 0,00205 | NM_001008393 | WSB2                      |
| 7966829 | 3,03 | 8,14    | 0,01193 | 3,78  | 13,70 | 0,00006 | NM_018639    | PFN2                      |
| 8091446 | 3,03 | 8,14    | 0,01336 | 5,34  | 40,62 | 0,00019 | NM_053024    | ATP5H                     |
| 8018288 | 3,02 | 8,13    | 0,00113 | 2,87  | 7,29  | 0,00075 | NM_006356    | CYR61                     |
| 7902687 | 3,02 | 8,12    | 0,00139 | 2,16  | 4,46  | 0,02400 | NM_001554    | HLTF                      |
| 8091354 | 3,02 | 8,12    | 0,00426 | 3,56  | 11,75 | 0,02072 | NM_003071    | FAM10A5                   |
| 7938756 | 3,02 | 8,12    | 0,01090 | 1,43  | 2,69  | 0,07702 | AF512499     | RPL36AL                   |
| 7978833 | 3,02 | 8,11    | 0,00446 | 3,28  | 9,71  | 0,00041 | NM_001001    | GBA                       |
| 7920697 | 3,02 | 8,11    | 0,04441 | 3,03  | 8,18  | 0,00270 | NM_000157    | ZNF805                    |
| 8031712 | 3,02 | 8,11    | 0,00650 | 2,54  | 5,80  | 0,00299 | NM_001145078 | B3GNT5                    |
| 8084206 | 3,02 | 8,11    | 0,00465 | 3,27  | 9,66  | 0,00114 | NM_032047    | STK39                     |
| 8056545 | 3,02 | 8,10    | 0,00563 | 2,80  | 6,96  | 0,00100 | NM_013233    | ISCA1                     |
| 8112331 | 3,02 | 8,09    | 0,05837 | 4,02  | 16,23 | 0,00054 | NM_030940    | HLA-C                     |
| 8178489 | 3,02 | 8,09    | 0,00297 | 3,70  | 13,00 | 0,00195 | NM_002117    | IGFBP3                    |
| 8139488 | 3,02 | 8,09    | 0,00007 | 1,06  | 2,08  | 0,16805 | NM_001013398 | CREG1                     |
| 7922051 | 3,01 | 8,08    | 0,00020 | 3,77  | 13,61 | 0,00015 | NM_003851    | H3F3A                     |
| 8102860 | 3,01 | 8,08    | 0,05496 | 3,38  | 10,41 | 0,00080 | NM_002107    | LRPPRC                    |
| 8051882 | 3,01 | 8,07    | 0,00597 | 3,44  | 10,82 | 0,01774 | NM_133259    | BTBD3                     |
| 8060988 | 3,01 | 8,06    | 0,00740 | 1,16  | 2,23  | 0,00991 | NM_014962    | HNRNPA1                   |
| 7995574 | 3,01 | 8,06    | 0,05108 | 1,63  | 3,10  | 0,00243 | NM_002136    | HIST1H2BK                 |
| 8068898 | 3,01 | 8,05    | 0,07875 | 3,67  | 12,74 | 0,00005 | NM_080593    | TMEM161B                  |
| 8113023 | 3,01 | 8,04    | 0,02232 | 4,21  | 18,55 | 0,00365 | NM_153354    | TOB1                      |
| 8016739 | 3,01 | 8,04    | 0,00049 | 2,03  | 4,09  | 0,01858 | NM_005749    | DNAJC3                    |
| 7969651 | 3,01 | 8,03    | 0,00186 | 3,52  | 11,48 | 0,00008 | NM_006260    | PLD3                      |
| 8028791 | 3,00 | 8,02    | 0,04111 | 5,34  | 40,56 | 0,00014 | NM_012268    | CD99                      |
| 8165794 | 3,00 | 8,02    | 0,00007 | 1,01  | 2,01  | 0,02360 | NM_002414    | CD99                      |
| 8176360 | 3,00 | 8,02    | 0,00007 | 1,01  | 2,01  | 0,02360 | NM_002414    | SFRS1                     |
| 8016898 | 3,00 | 8,01    | 0,00632 | 3,74  | 13,34 | 0,00019 | NM_001078166 | TBCEL                     |
| 7944623 | 3,00 | 8,01    | 0,00021 | 3,03  | 8,14  | 0,00235 | NM_152715    | UGCG                      |
| 8157216 | 3,00 | 8,01    | 0,01203 | 4,72  | 26,44 | 0,00014 | NM_003358    | APOO                      |
| 8171823 | 3,00 | 8,01    | 0,01836 | 3,82  | 14,09 | 0,00070 | NM_024122    | CRYBG3                    |
| 8081171 | 3,00 | 8,01    | 0,00143 | 1,96  | 3,89  | 0,02092 | NM_153605    | UBE2H                     |
| 8142886 | 3,00 | 8,00    | 0,00499 | 3,35  | 10,22 | 0,00124 | NM_003344    | SNCA                      |
| 8101762 | 3,00 | 8,00    | 0,00871 | -0,59 | -1,50 | 0,08097 | NM_000345    | MRPS35                    |
| 7954591 | 3,00 | 8,00    | 0,00113 | 2,99  | 7,96  | 0,00107 | NM_021821    | SMARCA5                   |
| 8097600 | 3,00 | 8,00    | 0,00122 | 1,73  | 3,32  | 0,07579 | NM_003601    | DDB1                      |
| 7948534 | 3,00 | 8,00    | 0,01572 | 3,67  | 12,73 | 0,00111 | NM_001923    | ANXA2P2 //                |
| ANXA2P2 | //   | ANXA2P2 |         |       |       |         |              |                           |
| 8154836 | 3,00 | 8,00    | 0,00686 | 2,13  | 4,38  | 0,00895 | NR_003573    | // NR_003573 // NR_003573 |
| SNORD13 |      |         |         |       |       |         |              |                           |
| 8086752 | 3,00 | 7,99    | 0,05439 | -2,25 | -4,74 | 0,33652 | NR_003041    | ATP5I                     |
| 8098762 | 3,00 | 7,98    | 0,00422 | 2,31  | 4,97  | 0,00039 | NM_007100    | IFIT1                     |
| 7929065 | 3,00 | 7,97    | 0,00031 | 0,16  | 1,12  | 0,51008 | NM_001548    | SYT11                     |
| 7906061 | 2,99 | 7,97    | 0,01327 | -0,31 | -1,24 | 0,11773 | NM_152280    | LETMD1                    |

|         |      |      |         |       |        |         |              |           |
|---------|------|------|---------|-------|--------|---------|--------------|-----------|
| 7955450 | 2,99 | 7,97 | 0,00719 | 4,84  | 28,60  | 0,00041 | NM_015416    | EMP3      |
| 8030007 | 2,99 | 7,96 | 0,00099 | 2,29  | 4,88   | 0,00061 | NM_001425    | KIAA1199  |
| 7985317 | 2,99 | 7,96 | 0,00608 | -0,34 | -1,26  | 0,02388 | NM_018689    | DEGS1     |
| 7910001 | 2,99 | 7,96 | 0,00770 | 3,00  | 8,01   | 0,00012 | NM_003676    | OXR1      |
| 8147848 | 2,99 | 7,96 | 0,00988 | 3,25  | 9,54   | 0,00030 | NM_181354    | RPS25     |
| 7939068 | 2,99 | 7,95 | 0,00009 | 2,59  | 6,04   | 0,00004 | NM_001028    | FAM135A   |
| 8120552 | 2,99 | 7,95 | 0,00706 | 4,00  | 15,99  | 0,00013 | NM_001105531 | AMZ2P1    |
| 8017704 | 2,99 | 7,95 | 0,01241 | 2,79  | 6,94   | 0,03321 | NR_026903    | CASC4     |
| 7983321 | 2,99 | 7,95 | 0,00048 | 1,49  | 2,80   | 0,05996 | NM_138423    | C18orf10  |
| 8022941 | 2,99 | 7,93 | 0,00177 | 2,44  | 5,41   | 0,02554 | NM_015476    | FILIP1L   |
| 8089112 | 2,99 | 7,93 | 0,00039 | -0,71 | -1,64  | 0,02373 | NM_182909    | ZNF506    |
| 8035773 | 2,99 | 7,92 | 0,00344 | 2,49  | 5,60   | 0,00126 | NM_001099269 | HIGD1A    |
| 7957519 | 2,99 | 7,92 | 0,00842 | 1,50  | 2,83   | 0,01583 | NM_001099668 | FAF1      |
| 7915995 | 2,98 | 7,92 | 0,00359 | 4,47  | 22,21  | 0,00111 | NM_007051    | SLCGA15   |
| 7965206 | 2,98 | 7,91 | 0,00349 | -0,99 | -1,99  | 0,00064 | NM_182767    | DPAGT1    |
| 7952185 | 2,98 | 7,91 | 0,00059 | 4,31  | 19,84  | 0,00106 | NM_001382    | TFDP2     |
| 8091103 | 2,98 | 7,91 | 0,00237 | 2,50  | 5,66   | 0,00144 | NM_006286    | TAF2      |
| 8152553 | 2,98 | 7,91 | 0,00839 | 3,52  | 11,45  | 0,00186 | NM_003184    | CCT5      |
| 8104449 | 2,98 | 7,91 | 0,00316 | 4,04  | 16,43  | 0,00006 | NM_012073    | NOTCH2NL  |
| 7904702 | 2,98 | 7,90 | 0,01658 | 2,42  | 5,37   | 0,00530 | NM_203458    | SLC30A6   |
| 8041257 | 2,98 | 7,90 | 0,02798 | 4,54  | 23,27  | 0,00007 | NM_017964    | KLHL9     |
| 8160405 | 2,98 | 7,90 | 0,00360 | 2,90  | 7,45   | 0,00024 | NM_018847    | C10orf57  |
| 7928671 | 2,98 | 7,89 | 0,03228 | 6,80  | 111,53 | 0,00003 | NM_025125    | ANAPC7    |
| 7966301 | 2,98 | 7,89 | 0,00070 | 3,85  | 14,40  | 0,00020 | NM_016238    | GBP2      |
| 7917532 | 2,98 | 7,89 | 0,00578 | 0,11  | 1,08   | 0,57247 | NM_004120    | PLXDC2    |
| 7926545 | 2,98 | 7,89 | 0,01376 | -0,72 | -1,65  | 0,02702 | NM_032812    | SLC30A9   |
| 8094848 | 2,98 | 7,88 | 0,00181 | 3,61  | 12,25  | 0,00061 | NM_006345    | DTX3L     |
| 8082075 | 2,98 | 7,87 | 0,00686 | 2,37  | 5,17   | 0,00304 | NM_138287    | RHOC      |
| 7918593 | 2,98 | 7,87 | 0,00074 | 2,65  | 6,26   | 0,00368 | NM_175744    | AP3S1     |
| 8107421 | 2,98 | 7,86 | 0,00001 | 2,61  | 6,11   | 0,01209 | NM_001284    | HDHD2     |
| 8023165 | 2,98 | 7,86 | 0,01946 | 3,54  | 11,63  | 0,00389 | NM_032124    | CCT2      |
| 7957052 | 2,98 | 7,86 | 0,00540 | 3,22  | 9,34   | 0,00011 | NM_006431    | IL10RB    |
| 8068254 | 2,97 | 7,86 | 0,02789 | 3,56  | 11,75  | 0,00061 | NM_000628    | ARHGAP42  |
| 7943349 | 2,97 | 7,85 | 0,00074 | 2,69  | 6,45   | 0,00243 | NM_152432    | CCNA2     |
| 8102643 | 2,97 | 7,85 | 0,00150 | 2,93  | 7,61   | 0,00007 | NM_001237    | MRPL42    |
| 7957540 | 2,97 | 7,84 | 0,00873 | 4,30  | 19,76  | 0,00306 | NM_014050    | IPO8      |
| 7962085 | 2,97 | 7,84 | 0,00197 | 3,46  | 11,03  | 0,00042 | NM_006390    | AEBP2     |
| 7954279 | 2,97 | 7,84 | 0,00188 | 2,46  | 5,52   | 0,00212 | NM_153207    | TNFRSF10D |
| 8149749 | 2,97 | 7,83 | 0,01759 | 4,06  | 16,74  | 0,00009 | NM_003840    | SDCCAG1   |
| 7978866 | 2,97 | 7,83 | 0,00185 | 2,64  | 6,25   | 0,00484 | NM_004713    | BNC2      |
| 8160260 | 2,97 | 7,83 | 0,00140 | -1,59 | -3,00  | 0,00577 | NM_017637    | TMEM106A  |
| 8019622 | 2,97 | 7,83 | 0,01019 | 1,94  | 3,83   | 0,00299 | NM_145041    | DDX42     |
| 8009205 | 2,97 | 7,81 | 0,00051 | 2,34  | 5,07   | 0,02135 | NM_007372    | NUP43     |
| 8130129 | 2,96 | 7,81 | 0,00457 | 3,43  | 10,79  | 0,00034 | NM_198887    | MKI67IP   |
| 8054930 | 2,96 | 7,80 | 0,03668 | 3,58  | 11,92  | 0,00058 | NM_032390    | GOT1      |
| 7935627 | 2,96 | 7,80 | 0,02354 | 4,05  | 16,60  | 0,00025 | NM_002079    | TNFRSF1A  |
| 7960518 | 2,96 | 7,80 | 0,01297 | 2,92  | 7,56   | 0,00610 | NM_001065    | PLAGL1    |
| 8129985 | 2,96 | 7,78 | 0,00605 | 3,04  | 8,21   | 0,00026 | NM_006718    | SDHAF2    |
| 7940486 | 2,96 | 7,78 | 0,00042 | 3,18  | 9,03   | 0,00106 | NM_017841    | MRPS21    |
| 7905163 | 2,96 | 7,78 | 0,04127 | 4,20  | 18,37  | 0,00050 | NM_018997    | GCNT1     |
| 8155930 | 2,96 | 7,78 | 0,00160 | 1,24  | 2,37   | 0,03319 | NM_001490    | SEL1L     |
| 7980547 | 2,96 | 7,78 | 0,00252 | 2,88  | 7,37   | 0,00127 | NM_005065    | SMARCA1   |
| 8174985 | 2,96 | 7,77 | 0,00748 | 2,89  | 7,43   | 0,00139 | NM_003069    | CLU       |
| 8149927 | 2,96 | 7,77 | 0,00500 | 1,41  | 2,65   | 0,00023 | NM_001831    | PERP      |
| 8129880 | 2,96 | 7,76 | 0,01242 | 2,32  | 5,01   | 0,00037 | NM_022121    | UBR3      |
| 8046213 | 2,96 | 7,75 | 0,01451 | 2,22  | 4,65   | 0,11420 | NM_172070    | CDK14     |
| 8134098 | 2,95 | 7,75 | 0,00279 | 2,42  | 5,36   | 0,00144 | NM_012395    | RPAP3     |
| 7962590 | 2,95 | 7,75 | 0,00106 | 2,40  | 5,29   | 0,02970 | NM_024604    | POLR2L    |
| 7945573 | 2,95 | 7,75 | 0,00553 | 3,40  | 10,53  | 0,00287 | NM_021128    | FCHSD2    |
| 7950248 | 2,95 | 7,74 | 0,00247 | 3,90  | 14,93  | 0,00023 | NM_014824    | RAB1B     |
| 7941583 | 2,95 | 7,73 | 0,01573 | 5,05  | 33,19  | 0,00011 | NM_030981    | PDIA4     |
| 8143684 | 2,95 | 7,73 | 0,00109 | 2,82  | 7,04   | 0,00188 | NM_004911    | TIPARP    |
| 8083569 | 2,95 | 7,73 | 0,01520 | 4,09  | 17,00  | 0,00745 | NM_015508    | POP4      |
| 8027390 | 2,94 | 7,70 | 0,00904 | 3,54  | 11,64  | 0,00021 | NM_006627    | ZFAND3    |
| 8119227 | 2,94 | 7,68 | 0,00021 | 3,29  | 9,81   | 0,00261 | NM_021943    | RCHY1     |
| 8101013 | 2,94 | 7,68 | 0,00414 | 2,93  | 7,60   | 0,00027 | NM_015436    | PAWR      |
| 7965112 | 2,94 | 7,67 | 0,00045 | 3,33  | 10,05  | 0,02884 | NM_002583    | BNIP2     |
| 7989323 | 2,94 | 7,67 | 0,00791 | 3,43  | 10,81  | 0,00003 | NM_004330    | TSPAN8    |
| 7964927 | 2,94 | 7,67 | 0,02421 | -0,52 | -1,43  | 0,09915 | NM_004616    | PHLDB2    |
| 8081590 | 2,94 | 7,65 | 0,00150 | 3,09  | 8,53   | 0,00130 | NM_001134439 | CHORDC1   |
| 7950983 | 2,94 | 7,65 | 0,00215 | 2,67  | 6,35   | 0,00039 | NM_012124    | PGAM1     |
| 7929624 | 2,94 | 7,65 | 0,01407 | 3,68  | 12,79  | 0,00026 | NM_002629    | ARL8B     |
| 8077450 | 2,93 | 7,63 | 0,04162 | 3,21  | 9,25   | 0,00122 | NM_018184    | RBMX      |

|         |      |      |         |       |       |         |              |          |
|---------|------|------|---------|-------|-------|---------|--------------|----------|
| 8175420 | 2,93 | 7,63 | 0,01005 | 2,40  | 5,27  | 0,00090 | NM_002139    | ELTD1    |
| 7917182 | 2,93 | 7,62 | 0,00963 | -0,76 | -1,70 | 0,00643 | NM_022159    | C11orf17 |
| 7938301 | 2,93 | 7,62 | 0,02652 | 4,51  | 22,71 | 0,00007 | NM_020642    | B4GALT4  |
| 8089743 | 2,93 | 7,62 | 0,00320 | 1,55  | 2,93  | 0,00369 | NM_212543    | DDX17    |
| 8076077 | 2,93 | 7,62 | 0,00200 | 3,95  | 15,48 | 0,00333 | NM_006386    | MLLT11   |
| 7905329 | 2,93 | 7,61 | 0,00629 | 2,32  | 5,01  | 0,00022 | NM_006818    | GOLIM4   |
| 8091954 | 2,93 | 7,61 | 0,00209 | 3,07  | 8,40  | 0,00057 | NM_014498    | RPS13    |
| 7946812 | 2,93 | 7,61 | 0,00270 | 2,92  | 7,58  | 0,01229 | NM_001017    | ENO1     |
| 7912198 | 2,93 | 7,61 | 0,00239 | 4,33  | 20,09 | 0,00033 | NM_001428    | MLL3     |
| 8143988 | 2,93 | 7,60 | 0,00207 | 2,90  | 7,48  | 0,00161 | NM_170606    | KIAA1279 |
| 7927955 | 2,93 | 7,60 | 0,00402 | 2,69  | 6,46  | 0,00056 | NM_015634    | CD109    |
| 8120719 | 2,93 | 7,60 | 0,00550 | 3,14  | 8,80  | 0,01189 | NM_133493    | AMFR     |
| 8001477 | 2,92 | 7,59 | 0,00761 | 3,57  | 11,91 | 0,00036 | NM_001144    | OXA1L    |
| 7973314 | 2,92 | 7,59 | 0,00924 | 2,67  | 6,36  | 0,00000 | NM_005015    | UBR2     |
| 8119529 | 2,92 | 7,59 | 0,00289 | 3,41  | 10,59 | 0,00031 | NM_015255    | SNX5     |
| 8065165 | 2,92 | 7,58 | 0,00110 | 2,50  | 5,65  | 0,00209 | NM_152227    | APPL1    |
| 8080645 | 2,92 | 7,58 | 0,00045 | 3,21  | 9,28  | 0,00210 | NM_012096    | PMS2L2   |
| 8133300 | 2,92 | 7,57 | 0,00581 | 4,21  | 18,49 | 0,00004 | NR_003614    | USMG5    |
| 7936091 | 2,92 | 7,56 | 0,00175 | 4,50  | 22,70 | 0,00205 | NM_032747    | SMYD2    |
| 7909689 | 2,92 | 7,55 | 0,00162 | 3,67  | 12,75 | 0,00022 | NM_020197    | RALGPS2  |
| 7907657 | 2,92 | 7,55 | 0,00618 | 2,80  | 6,98  | 0,00070 | NM_152663    | ACADM    |
| 7902367 | 2,92 | 7,54 | 0,00691 | 3,73  | 13,31 | 0,00116 | NM_000016    | PMAIP1   |
| 8021470 | 2,91 | 7,53 | 0,00979 | 4,07  | 16,81 | 0,00006 | NM_021127    | CPSF2    |
| 7976243 | 2,91 | 7,53 | 0,00629 | 3,70  | 13,03 | 0,00002 | NM_017437    | EZH1     |
| 8015685 | 2,91 | 7,53 | 0,00132 | 3,25  | 9,53  | 0,00014 | NM_001991    | THOC2    |
| 8174893 | 2,91 | 7,53 | 0,00623 | 3,31  | 9,93  | 0,00127 | NM_001081550 | SNX1     |
| 7984155 | 2,91 | 7,53 | 0,00214 | 2,91  | 7,52  | 0,00053 | NM_003099    | PTGER2   |
| 7974366 | 2,91 | 7,52 | 0,00100 | 0,39  | 1,31  | 0,07994 | NM_000956    | ---      |
| 8111099 | 2,91 | 7,51 | 0,00336 | 1,98  | 3,94  | 0,01346 | ---          | NDUFC2   |
| 7950644 | 2,91 | 7,51 | 0,00339 | 3,85  | 14,38 | 0,00149 | NM_004549    | C12orf75 |
| 7958253 | 2,91 | 7,51 | 0,00035 | 2,95  | 7,72  | 0,00055 | NM_001145199 | CNOT6L   |
| 7989128 | 2,91 | 7,50 | 0,00568 | 2,80  | 6,98  | 0,00298 | NM_144571    | CLPX     |
| 7989735 | 2,91 | 7,50 | 0,00430 | 2,97  | 7,86  | 0,00008 | NM_006660    | WTAP     |
| 8123129 | 2,91 | 7,49 | 0,03714 | 1,93  | 3,82  | 0,02075 | NM_004906    | GNB4     |
| 8092251 | 2,91 | 7,49 | 0,01252 | 3,09  | 8,50  | 0,00028 | NM_021629    | SNX25    |
| 8098581 | 2,91 | 7,49 | 0,00278 | 1,61  | 3,06  | 0,00601 | NM_031953    | DFNA5    |
| 8138602 | 2,90 | 7,49 | 0,00402 | 2,58  | 5,96  | 0,00040 | NM_004403    | MET      |
| 8135601 | 2,90 | 7,48 | 0,00844 | 2,91  | 7,51  | 0,01907 | NM_001127500 | OPTN     |
| 7926239 | 2,90 | 7,48 | 0,00242 | 1,44  | 2,71  | 0,00653 | NM_001008211 | C1orf174 |
| 7911897 | 2,90 | 7,47 | 0,00279 | 3,96  | 15,61 | 0,00050 | NM_207356    | DNAJB9   |
| 8135480 | 2,90 | 7,47 | 0,00022 | 3,06  | 8,37  | 0,00129 | NM_012328    | ---      |
| 8097655 | 2,90 | 7,47 | 0,00254 | 2,90  | 7,44  | 0,00909 | ---          | XPO7     |
| 8144953 | 2,90 | 7,47 | 0,00342 | 4,17  | 17,99 | 0,00009 | NM_001100161 | MED6     |
| 7979931 | 2,90 | 7,46 | 0,00749 | 3,62  | 12,27 | 0,00389 | NM_005466    | TIMM8B   |
| 7951679 | 2,90 | 7,46 | 0,00113 | 2,65  | 6,29  | 0,00125 | NR_028383    | PPP2R5C  |
| 7976863 | 2,90 | 7,46 | 0,00199 | 3,83  | 14,22 | 0,00000 | NM_001161725 | ACVR1    |
| 8056005 | 2,90 | 7,46 | 0,00778 | 3,20  | 9,17  | 0,00520 | NM_001105    | DCTN6    |
| 8145660 | 2,90 | 7,45 | 0,00402 | 2,46  | 5,50  | 0,04367 | NM_006571    | BCLAF1   |
| 8129773 | 2,90 | 7,45 | 0,00318 | 2,90  | 7,44  | 0,00163 | NM_014739    | STK4     |
| 8062908 | 2,90 | 7,45 | 0,02183 | 2,64  | 6,21  | 0,00038 | NM_006282    | FRYL     |
| 8100251 | 2,90 | 7,44 | 0,00615 | 2,93  | 7,64  | 0,00070 | NM_015030    | ZDHHC3   |
| 8086505 | 2,89 | 7,43 | 0,00816 | 2,87  | 7,30  | 0,00005 | NM_016598    | RNF25    |
| 8058985 | 2,89 | 7,43 | 0,01108 | 3,67  | 12,71 | 0,00011 | NM_022453    | ZNF430   |
| 8027279 | 2,89 | 7,43 | 0,01173 | 2,66  | 6,31  | 0,00456 | NM_025189    | NDUFA9   |
| 7953243 | 2,89 | 7,42 | 0,00324 | 4,12  | 17,43 | 0,00030 | NM_005002    | TMEM106A |
| 8007483 | 2,89 | 7,42 | 0,00753 | 1,57  | 2,96  | 0,01359 | NM_145041    | XPR1     |
| 7907861 | 2,89 | 7,42 | 0,01430 | 4,18  | 18,08 | 0,00001 | NM_004736    | RHBDD1   |
| 8048772 | 2,89 | 7,42 | 0,01207 | 2,73  | 6,66  | 0,00313 | NM_032276    | ASAH2    |
| 7927599 | 2,89 | 7,42 | 0,00211 | 4,19  | 18,26 | 0,00120 | NM_019893    | TMEM116  |
| 7966448 | 2,89 | 7,42 | 0,00143 | 2,56  | 5,88  | 0,00354 | NM_138341    | GINS1    |
| 8061471 | 2,89 | 7,41 | 0,00547 | 4,87  | 29,22 | 0,00006 | NM_021067    | GBE1     |
| 8088958 | 2,89 | 7,41 | 0,01502 | 1,40  | 2,64  | 0,00578 | NM_000158    | USP1L    |
| 7968333 | 2,89 | 7,41 | 0,01996 | 2,57  | 5,95  | 0,00042 | NM_005800    | FAP      |
| 8056257 | 2,89 | 7,41 | 0,02043 | -1,54 | -2,91 | 0,00249 | NM_004460    | FAM164A  |
| 8147019 | 2,89 | 7,41 | 0,00044 | 2,68  | 6,42  | 0,00818 | NM_016010    | SMU1     |
| 8160622 | 2,89 | 7,41 | 0,00025 | 3,15  | 8,85  | 0,00218 | NM_018225    | TWF1     |
| 8013906 | 2,89 | 7,41 | 0,00151 | 1,85  | 3,60  | 0,00044 | NM_002822    | PIK3R4   |
| 8090639 | 2,89 | 7,40 | 0,01219 | 3,12  | 8,67  | 0,00407 | NM_014602    | PEX13    |
| 8042161 | 2,89 | 7,39 | 0,01247 | 3,19  | 9,12  | 0,00087 | NM_002618    | ME2      |
| 8021208 | 2,89 | 7,39 | 0,01259 | 3,23  | 9,36  | 0,00032 | NM_002396    | HAUS2    |
| 7983123 | 2,89 | 7,39 | 0,00500 | 2,15  | 4,45  | 0,16323 | NM_018097    | NGLY1    |
| 8085852 | 2,88 | 7,39 | 0,00284 | 2,98  | 7,89  | 0,00003 | NM_018297    | CPSF3    |
| 8040142 | 2,88 | 7,39 | 0,00154 | 3,63  | 12,39 | 0,00022 | NM_016207    | KIAA0317 |

|         |      |      |         |       |       |         |                        |                  |
|---------|------|------|---------|-------|-------|---------|------------------------|------------------|
| 7980189 | 2,88 | 7,38 | 0,00806 | 3,94  | 15,34 | 0,00146 | NM_001039479           | WLS              |
| 7916862 | 2,88 | 7,38 | 0,00201 | 2,65  | 6,28  | 0,00450 | NM_024911              | GOLM1            |
| 8162117 | 2,88 | 7,37 | 0,00276 | 3,12  | 8,71  | 0,00124 | NM_016548              | DDX47            |
| 7954036 | 2,88 | 7,37 | 0,00927 | 2,91  | 7,54  | 0,00045 | NM_016355              | ANP32A // ANP32A |
| 7982531 | 2,88 | 7,37 | 0,00785 | 2,79  | 6,92  | 0,00436 | NM_006305 // NM_006305 | SUPT7L           |
| 8051204 | 2,88 | 7,37 | 0,00126 | 4,47  | 22,24 | 0,00023 | NM_014860              | MYADM            |
| 8031047 | 2,88 | 7,37 | 0,00247 | 1,65  | 3,14  | 0,00030 | NM_001020818           | NPAT             |
| 7951497 | 2,88 | 7,37 | 0,00599 | 1,72  | 3,28  | 0,03811 | NM_002519              | NUP98            |
| 7945902 | 2,88 | 7,36 | 0,00290 | 3,71  | 13,10 | 0,00003 | NM_016320              | IGFBP4           |
| 8007100 | 2,88 | 7,36 | 0,03614 | 1,87  | 3,65  | 0,02457 | NM_001552              | HLA-A            |
| 8117800 | 2,88 | 7,35 | 0,01112 | 3,08  | 8,43  | 0,00153 | NM_002116              | UBA6             |
| 8100615 | 2,88 | 7,35 | 0,00043 | 2,07  | 4,20  | 0,01895 | NM_018227              | MYC              |
| 8148317 | 2,88 | 7,34 | 0,00199 | 3,61  | 12,25 | 0,00155 | NM_002467              | FAM13B           |
| 8114326 | 2,87 | 7,34 | 0,00034 | 2,12  | 4,34  | 0,01226 | NM_016603              | CPEB2            |
| 8094169 | 2,87 | 7,34 | 0,00121 | 1,96  | 3,88  | 0,01181 | NM_182485              | RAP2A            |
| 7969693 | 2,87 | 7,33 | 0,00526 | 1,78  | 3,44  | 0,00774 | NM_021033              | STX3             |
| 7940191 | 2,87 | 7,33 | 0,00106 | 3,09  | 8,53  | 0,00001 | NM_004177              | UACA             |
| 7990054 | 2,87 | 7,33 | 0,00458 | 0,64  | 1,56  | 0,12877 | NM_018003              | NDUFB10          |
| 7992402 | 2,87 | 7,32 | 0,00751 | 2,95  | 7,75  | 0,00343 | NM_004548              | ---              |
| 7964828 | 2,87 | 7,32 | 0,01067 | 2,50  | 5,66  | 0,00171 | --- RAB3B              | ---              |
| 7916112 | 2,87 | 7,32 | 0,02098 | 3,68  | 12,79 | 0,00035 | NM_002867              | ABCD3            |
| 7903119 | 2,87 | 7,31 | 0,01067 | 3,95  | 15,50 | 0,00002 | NM_002858              | ---              |
| 8145134 | 2,87 | 7,31 | 0,00623 | 0,08  | 1,06  | 0,82487 | --- PDIA5              | ---              |
| 8082133 | 2,87 | 7,31 | 0,00553 | 2,59  | 6,02  | 0,00083 | NM_006810              | NOLC1            |
| 7930008 | 2,87 | 7,30 | 0,03465 | 3,55  | 11,71 | 0,00469 | NM_004741              | SNORD116-8       |
| 7981964 | 2,87 | 7,30 | 0,01190 | -2,18 | -4,54 | 0,11817 | NR_003323              | BRAP             |
| 7966427 | 2,87 | 7,30 | 0,00019 | 2,81  | 7,01  | 0,00691 | NM_006768              | ZCCHC9           |
| 8106702 | 2,87 | 7,30 | 0,00614 | 2,63  | 6,20  | 0,00270 | NM_032280              | H3F3C            |
| 7962194 | 2,87 | 7,29 | 0,08550 | 2,69  | 6,44  | 0,01155 | NM_001013699           | CTGF             |
| 8129562 | 2,87 | 7,29 | 0,00484 | 1,13  | 2,18  | 0,07931 | NM_001901              | STK17B           |
| 8057887 | 2,87 | 7,29 | 0,04242 | 2,08  | 4,23  | 0,04482 | NM_004226              | C5orf24          |
| 8108163 | 2,87 | 7,29 | 0,00312 | 3,07  | 8,40  | 0,02153 | NM_152409              | WBP2             |
| 8018482 | 2,87 | 7,29 | 0,00311 | 3,77  | 13,68 | 0,00142 | NM_012478              | ACTG1            |
| 8019183 | 2,87 | 7,29 | 0,01262 | 3,30  | 9,86  | 0,00001 | NM_001614              | BLMH             |
| 8014008 | 2,87 | 7,29 | 0,01581 | 2,84  | 7,16  | 0,00018 | NM_000386              | MAP4K3           |
| 8051707 | 2,86 | 7,28 | 0,01938 | 2,38  | 5,22  | 0,07543 | NM_003618              | RNF2             |
| 7908169 | 2,86 | 7,28 | 0,00153 | 2,55  | 5,87  | 0,00205 | NM_007212              | SERTAD2          |
| 8052669 | 2,86 | 7,28 | 0,00155 | 2,85  | 7,22  | 0,00068 | NM_014755              | DCP1A            |
| 8088128 | 2,86 | 7,28 | 0,00084 | 3,47  | 11,09 | 0,00208 | NM_018403              | DNAJC7           |
| 8015490 | 2,86 | 7,28 | 0,00071 | 3,27  | 9,63  | 0,00249 | NM_003315              | GLS              |
| 8047097 | 2,86 | 7,27 | 0,00231 | 2,90  | 7,46  | 0,00173 | NM_014905              | SNRK             |
| 8079140 | 2,86 | 7,27 | 0,00748 | 2,61  | 6,13  | 0,00092 | NM_017719              | AQR              |
| 7987325 | 2,86 | 7,27 | 0,00027 | 3,22  | 9,33  | 0,00256 | NM_014691              | VAT1             |
| 8015759 | 2,86 | 7,27 | 0,00116 | 3,17  | 9,00  | 0,00481 | NM_006373              | BIRC2            |
| 7943424 | 2,86 | 7,27 | 0,00565 | 3,61  | 12,21 | 0,00057 | NM_001166              | SFRS2IP          |
| 7962499 | 2,86 | 7,26 | 0,00143 | 2,15  | 4,44  | 0,00500 | NM_004719              | KPNA4            |
| 8091764 | 2,86 | 7,26 | 0,01840 | 3,79  | 13,83 | 0,00022 | NM_002268              | ANPEP            |
| 7991335 | 2,86 | 7,26 | 0,00939 | -0,80 | -1,74 | 0,06033 | NM_001150              | DAP3             |
| 7906041 | 2,86 | 7,26 | 0,00216 | 3,19  | 9,10  | 0,00001 | NM_033657              | NUP93            |
| 7995843 | 2,86 | 7,26 | 0,00614 | 3,42  | 10,73 | 0,00114 | NM_014669              | LAPTM4B          |
| 8147503 | 2,86 | 7,26 | 0,02384 | 4,53  | 23,16 | 0,00756 | NM_018407              | DKK3             |
| 7946661 | 2,86 | 7,25 | 0,00018 | -0,53 | -1,44 | 0,07865 | NM_015881              | ZNF259           |
| 7951838 | 2,86 | 7,25 | 0,00684 | 3,40  | 10,52 | 0,00002 | NM_003904              | PCM1             |
| 8144812 | 2,86 | 7,25 | 0,00188 | 3,09  | 8,51  | 0,00528 | NM_006197              | KDEL1            |
| 8038078 | 2,86 | 7,25 | 0,02623 | 3,18  | 9,07  | 0,00015 | NM_006801              | PJA2             |
| 8113469 | 2,86 | 7,25 | 0,00566 | 2,75  | 6,74  | 0,00057 | NM_014819              | SFT2D2           |
| 7907135 | 2,86 | 7,24 | 0,01040 | 3,29  | 9,80  | 0,00143 | NM_199344              | RAB21            |
| 7957177 | 2,86 | 7,24 | 0,02291 | 3,41  | 10,60 | 0,00051 | NM_014999              | POLDIP2          |
| 8013588 | 2,85 | 7,23 | 0,01602 | 3,99  | 15,92 | 0,00113 | NM_015584              | MFSD6            |
| 8047078 | 2,85 | 7,23 | 0,00111 | 2,55  | 5,84  | 0,00052 | NM_017694              | SPTAN1           |
| 8158317 | 2,85 | 7,23 | 0,00325 | 2,93  | 7,61  | 0,00225 | NM_001130438           | TMEM2            |
| 8161701 | 2,85 | 7,23 | 0,02287 | 4,09  | 17,05 | 0,00075 | NM_013390              | ELP2             |
| 8020930 | 2,85 | 7,23 | 0,00655 | 3,24  | 9,45  | 0,00001 | NM_018255              | PKM2             |
| 7990151 | 2,85 | 7,22 | 0,00008 | 2,62  | 6,15  | 0,00015 | NM_182470              | DDX24            |
| 7981032 | 2,85 | 7,22 | 0,00057 | 3,26  | 9,56  | 0,00006 | NM_020414              | MFAP3            |
| 8109403 | 2,85 | 7,21 | 0,01085 | 3,96  | 15,54 | 0,00177 | NR_024152              | EIF4H            |
| 8133434 | 2,85 | 7,20 | 0,00765 | 2,86  | 7,25  | 0,00095 | NM_022170              | ELL2             |
| 8113220 | 2,85 | 7,19 | 0,00028 | 1,82  | 3,53  | 0,01196 | NM_012081              | HUWE1            |
| 8172914 | 2,85 | 7,19 | 0,00645 | 3,32  | 10,01 | 0,01502 | NM_031407              | GLCCI1           |
| 8131496 | 2,84 | 7,18 | 0,01993 | 2,95  | 7,70  | 0,00434 | NM_138426              | HMG2A            |
| 7956867 | 2,84 | 7,18 | 0,00054 | 0,23  | 1,17  | 0,19155 | NM_003483              | GK               |
| 8174103 | 2,84 | 7,18 | 0,00779 | 2,88  | 7,38  | 0,01759 | NM_001128127           | ATE1             |
| 7936762 | 2,84 | 7,18 | 0,00344 | 4,22  | 18,64 | 0,00001 | NM_001001976           | INTS4L1          |

|         |      |      |         |       |       |         |                 |           |
|---------|------|------|---------|-------|-------|---------|-----------------|-----------|
| 8133074 | 2,84 | 7,17 | 0,01098 | 2,58  | 5,96  | 0,00387 | NR_027393       | ZNF708    |
| 8035803 | 2,84 | 7,17 | 0,00017 | 1,87  | 3,64  | 0,00886 | NM_021269       | PIK3CA    |
| 8084016 | 2,84 | 7,17 | 0,00588 | 3,30  | 9,86  | 0,00028 | NM_006218       | ATL1      |
| 7974270 | 2,84 | 7,16 | 0,00312 | 1,01  | 2,01  | 0,06024 | NM_015915       | TMEM192   |
| 8103524 | 2,84 | 7,16 | 0,00549 | 1,94  | 3,85  | 0,00213 | NM_001100389    | NUPR1     |
| 8000574 | 2,84 | 7,16 | 0,00050 | 0,44  | 1,35  | 0,07095 | NM_001042483    | MRPL18    |
| 8123148 | 2,84 | 7,16 | 0,02010 | 2,66  | 6,34  | 0,00128 | NM_014161       | EYA1      |
| 8151310 | 2,84 | 7,15 | 0,00913 | -0,57 | -1,49 | 0,08420 | NM_000503       | C11orf58  |
| 7938669 | 2,84 | 7,14 | 0,02419 | 3,15  | 8,89  | 0,00266 | NM_014267       | ASH2L     |
| 8145894 | 2,84 | 7,14 | 0,01058 | 3,98  | 15,74 | 0,00092 | NM_004674       | LPAR6     |
| 7971565 | 2,84 | 7,14 | 0,01364 | -1,40 | -2,64 | 0,02407 | NM_005767       | RBBP8     |
| 8020468 | 2,83 | 7,13 | 0,00451 | 3,96  | 15,57 | 0,00103 | NM_002894       | CSNK1G3   |
| 8107655 | 2,83 | 7,13 | 0,00368 | 3,17  | 9,02  | 0,00019 | NM_004384       | CLCC1     |
| 7918255 | 2,83 | 7,12 | 0,00444 | 2,73  | 6,64  | 0,00446 | NM_001048210    | TMEM170A  |
| 8002878 | 2,83 | 7,12 | 0,00897 | 4,77  | 27,38 | 0,00009 | NM_145254       | COBLL1    |
| 8056343 | 2,83 | 7,12 | 0,00080 | 1,09  | 2,12  | 0,00943 | NM_014900       | C12orf62  |
| 7955358 | 2,83 | 7,12 | 0,00126 | 2,01  | 4,02  | 0,00029 | BC007849 AKAP10 |           |
| 8013431 | 2,83 | 7,11 | 0,00876 | 3,18  | 9,04  | 0,00105 | NM_007202       | MMAA      |
| 8097670 | 2,83 | 7,11 | 0,00220 | 1,17  | 2,25  | 0,02596 | NM_172250       | GTF2H3    |
| 7959623 | 2,83 | 7,11 | 0,00243 | 3,34  | 10,13 | 0,00183 | NM_001516       | TMEM179B  |
| 7940711 | 2,83 | 7,10 | 0,00026 | 3,16  | 8,93  | 0,00087 | NM_199337       | ADIPOR1   |
| 7923503 | 2,83 | 7,10 | 0,00801 | 4,45  | 21,86 | 0,01214 | NM_015999       | SMAD2     |
| 8023195 | 2,83 | 7,09 | 0,00959 | 3,45  | 10,95 | 0,00007 | NM_005901       | CYP2R1    |
| 7946742 | 2,83 | 7,09 | 0,01744 | 4,15  | 17,76 | 0,00010 | NM_024514       | PSMB3     |
| 8006812 | 2,83 | 7,09 | 0,02112 | 2,08  | 4,24  | 0,00628 | NM_002795       | TMOD1     |
| 8156706 | 2,83 | 7,09 | 0,03126 | 1,95  | 3,86  | 0,01110 | NM_003275       | NUP133    |
| 7924923 | 2,83 | 7,09 | 0,00285 | 4,06  | 16,67 | 0,00016 | NM_018230       | REEP3     |
| 7927799 | 2,82 | 7,08 | 0,00026 | 2,53  | 5,79  | 0,00150 | NM_001001330    | ARMCX6    |
| 8174086 | 2,82 | 7,08 | 0,00072 | 3,10  | 8,56  | 0,00054 | NM_019007       | VPS11     |
| 7944382 | 2,82 | 7,08 | 0,00151 | 2,79  | 6,93  | 0,00005 | NM_021729       | TMED5     |
| 7917741 | 2,82 | 7,08 | 0,00454 | 2,52  | 5,75  | 0,00999 | NM_016040       | TINF2     |
| 7978208 | 2,82 | 7,08 | 0,00611 | 3,19  | 9,11  | 0,00521 | NM_012461       | ---       |
| 8133902 | 2,82 | 7,08 | 0,00201 | 1,95  | 3,85  | 0,03737 | --- USP46       |           |
| 8100328 | 2,82 | 7,08 | 0,01244 | 2,44  | 5,42  | 0,00060 | NM_022832       | EIF2A     |
| 8083333 | 2,82 | 7,07 | 0,00130 | 2,57  | 5,94  | 0,00288 | NM_032025       | ---       |
| 8138545 | 2,82 | 7,06 | 0,00991 | 1,70  | 3,25  | 0,00826 | --- APPBP2      |           |
| 8017235 | 2,82 | 7,06 | 0,00527 | 3,56  | 11,82 | 0,00058 | NM_006380       | METAP2    |
| 7957633 | 2,82 | 7,06 | 0,00094 | 3,19  | 9,10  | 0,00502 | NM_006838       | SPRED1    |
| 7982564 | 2,82 | 7,05 | 0,00116 | 2,62  | 6,16  | 0,00119 | NM_152594       | SRGAP2    |
| 7904469 | 2,82 | 7,05 | 0,00722 | 3,57  | 11,87 | 0,00027 | NM_015326       | MR1       |
| 7907893 | 2,81 | 7,04 | 0,00226 | 2,64  | 6,22  | 0,00025 | NM_001531       | RABL2A    |
| 8044669 | 2,81 | 7,03 | 0,01029 | 3,18  | 9,09  | 0,00187 | NM_013412       | YY1AP1    |
| 7920799 | 2,81 | 7,03 | 0,00005 | 1,97  | 3,91  | 0,01141 | NM_139118       | TIA1      |
| 8052845 | 2,81 | 7,02 | 0,00352 | 4,09  | 17,00 | 0,00029 | NM_022173       | GTPBP8    |
| 8081676 | 2,81 | 7,02 | 0,00164 | 1,99  | 3,98  | 0,01367 | NM_014170       | SRFBP1    |
| 8107578 | 2,81 | 7,01 | 0,01137 | 2,31  | 4,95  | 0,03214 | NM_152546       | STRAP     |
| 7954173 | 2,81 | 7,01 | 0,01445 | 3,71  | 13,12 | 0,00179 | NM_007178       | EPHX1     |
| 7910111 | 2,81 | 7,01 | 0,00058 | 3,08  | 8,45  | 0,00314 | NM_000120       | ATP6V1A   |
| 8081740 | 2,81 | 7,01 | 0,01626 | 2,63  | 6,18  | 0,00035 | NM_001690       | YTHDF2    |
| 7899519 | 2,81 | 7,01 | 0,00229 | 2,63  | 6,20  | 0,00040 | NM_016258       | FADS1     |
| 7948612 | 2,81 | 7,00 | 0,00191 | 4,62  | 24,54 | 0,00055 | NM_013402       | FRRS1     |
| 7917954 | 2,81 | 7,00 | 0,02064 | 1,96  | 3,90  | 0,01143 | NM_001013660    | DONSON    |
| 8070129 | 2,81 | 7,00 | 0,01573 | 3,59  | 12,03 | 0,00056 | NM_017613       | MORN2     |
| 8041561 | 2,81 | 7,00 | 0,00883 | 2,07  | 4,19  | 0,01580 | NM_001145450    | MAPK14    |
| 8119000 | 2,81 | 7,00 | 0,00072 | 3,74  | 13,33 | 0,00003 | NM_001315       | PARN      |
| 7999562 | 2,81 | 6,99 | 0,00429 | 2,51  | 5,69  | 0,02372 | NM_002582       | SSR2      |
| 7920903 | 2,81 | 6,99 | 0,00382 | 3,88  | 14,72 | 0,00005 | NM_003145       | PREPL     |
| 8051928 | 2,80 | 6,99 | 0,01088 | 2,90  | 7,47  | 0,00095 | NM_006036       | TBC1D15   |
| 7957186 | 2,80 | 6,99 | 0,00744 | 3,22  | 9,33  | 0,01371 | NM_022771       | MTMR9     |
| 8144586 | 2,80 | 6,99 | 0,01908 | 3,63  | 12,34 | 0,00056 | NM_015458       | C1orf198  |
| 7924996 | 2,80 | 6,98 | 0,00529 | 2,10  | 4,28  | 0,00013 | NM_032800       | PCGF3     |
| 8093398 | 2,80 | 6,97 | 0,00170 | 3,40  | 10,57 | 0,00010 | NM_006315       | MT1E      |
| 7995797 | 2,80 | 6,97 | 0,02184 | 3,57  | 11,88 | 0,00041 | NM_175617       | GNPDA2    |
| 8100085 | 2,80 | 6,97 | 0,00165 | 3,11  | 8,63  | 0,00610 | NM_138335       | KCNRG     |
| 7969166 | 2,80 | 6,97 | 0,00205 | 4,21  | 18,45 | 0,00389 | NM_173605       | SLC7A6    |
| 7996772 | 2,80 | 6,97 | 0,01835 | 3,65  | 12,53 | 0,00143 | NM_003983       | SLC37A3   |
| 8143367 | 2,80 | 6,97 | 0,00447 | 2,38  | 5,22  | 0,00068 | NM_207113       | TFPI2     |
| 8141016 | 2,80 | 6,96 | 0,01420 | 3,73  | 13,30 | 0,00012 | NM_006528       | ARMC8     |
| 8082940 | 2,80 | 6,95 | 0,01922 | 3,75  | 13,47 | 0,00065 | NM_015396       | AKR1C2    |
| 7931832 | 2,80 | 6,95 | 0,00238 | 1,78  | 3,44  | 0,05273 | NM_001354       | PSME4     |
| 8052149 | 2,79 | 6,94 | 0,02816 | 2,96  | 7,76  | 0,00398 | NM_014614       | ZFH4      |
| 8147000 | 2,79 | 6,94 | 0,00385 | 0,66  | 1,58  | 0,01835 | NM_024721       | APOBEC3B  |
| 8073062 | 2,79 | 6,94 | 0,00515 | 5,13  | 34,97 | 0,00004 | NM_004900       | LOC402778 |



|         |      |      |         |       |       |         |              |           |
|---------|------|------|---------|-------|-------|---------|--------------|-----------|
| 7945663 | 2,79 | 6,94 | 0,00528 | 1,76  | 3,40  | 0,00053 | NM_001170820 | PMS2L11   |
| 8133754 | 2,79 | 6,93 | 0,00188 | 3,97  | 15,63 | 0,00002 | NR_023383    | GSTK1     |
| 8136849 | 2,79 | 6,93 | 0,00278 | 1,71  | 3,26  | 0,02047 | NM_001143679 | NPIP      |
| 7999634 | 2,79 | 6,92 | 0,02179 | 3,74  | 13,35 | 0,00029 | NM_006985    | RIN2      |
| 8061247 | 2,79 | 6,92 | 0,00764 | 1,35  | 2,55  | 0,00180 | NM_018993    | LCMT1     |
| 7994237 | 2,79 | 6,92 | 0,01641 | 3,78  | 13,72 | 0,00027 | NM_016309    | CTR9      |
| 7938422 | 2,79 | 6,92 | 0,00565 | 2,92  | 7,55  | 0,00790 | NM_014633    | ZNF146    |
| 8028186 | 2,79 | 6,91 | 0,00342 | 5,13  | 35,05 | 0,00004 | NM_007145    | RPS11     |
| 8030368 | 2,79 | 6,91 | 0,00092 | 1,62  | 3,08  | 0,00237 | NM_001015    | PROS1     |
| 8089015 | 2,79 | 6,91 | 0,00693 | 2,71  | 6,54  | 0,00838 | NM_000313    | PHGDH     |
| 7904433 | 2,79 | 6,91 | 0,01303 | 3,49  | 11,25 | 0,00079 | NM_006623    | SDHD      |
| 7899016 | 2,79 | 6,91 | 0,00488 | 4,66  | 25,32 | 0,00786 | NM_003002    | SNW1      |
| 7980463 | 2,79 | 6,90 | 0,00031 | 2,65  | 6,28  | 0,00598 | NM_012245    | BCL6      |
| 8092691 | 2,79 | 6,90 | 0,01802 | 1,86  | 3,63  | 0,00364 | NM_001706    | PCGF5     |
| 7929132 | 2,79 | 6,90 | 0,00350 | 3,59  | 12,05 | 0,00010 | NM_032373    | HLA-C     |
| 8124901 | 2,79 | 6,90 | 0,00347 | 3,41  | 10,61 | 0,00193 | NM_002117    | ITGBL1    |
| 7969861 | 2,79 | 6,90 | 0,01643 | -0,20 | -1,15 | 0,08436 | NM_004791    | MANSC1    |
| 7961365 | 2,79 | 6,90 | 0,01728 | 1,25  | 2,37  | 0,03169 | NM_018050    | CCDC50    |
| 8084818 | 2,78 | 6,89 | 0,00085 | 2,71  | 6,55  | 0,00029 | NM_178335    | MPDZ      |
| 8160088 | 2,78 | 6,89 | 0,00983 | 2,80  | 6,95  | 0,00007 | NM_003829    | GLI3      |
| 8139212 | 2,78 | 6,89 | 0,01145 | -0,20 | -1,15 | 0,33907 | NM_000168    | PCNP      |
| 7971563 | 2,78 | 6,88 | 0,00579 | 1,99  | 3,97  | 0,00051 | NM_020357    | NDFIP1    |
| 8108861 | 2,78 | 6,88 | 0,00822 | 1,84  | 3,58  | 0,00182 | NM_030571    | TTL5      |
| 7975815 | 2,78 | 6,88 | 0,00275 | 3,16  | 8,92  | 0,00122 | NM_015072    | SPON2     |
| 8098870 | 2,78 | 6,88 | 0,00013 | -1,13 | -2,19 | 0,03551 | NM_012445    | EPB41L2   |
| 8129497 | 2,78 | 6,88 | 0,00382 | 3,06  | 8,37  | 0,00001 | NM_001431    | FBXL4     |
| 8128356 | 2,78 | 6,87 | 0,00099 | 2,65  | 6,26  | 0,00082 | NM_012160    | HADHA     |
| 8050908 | 2,78 | 6,87 | 0,01398 | 4,21  | 18,46 | 0,00011 | NM_000182    | RPS23     |
| 8112961 | 2,78 | 6,86 | 0,00154 | 3,50  | 11,30 | 0,00136 | NM_001025    | HDDC2     |
| 8129363 | 2,78 | 6,86 | 0,00114 | 2,11  | 4,32  | 0,00323 | NM_016063    | DDX3X     |
| 8166876 | 2,78 | 6,85 | 0,00842 | 3,04  | 8,22  | 0,00003 | NM_001356    | PGGT1B    |
| 8113591 | 2,78 | 6,85 | 0,01612 | 2,92  | 7,57  | 0,00277 | NM_005023    | SNORA23   |
| 7938329 | 2,78 | 6,85 | 0,00714 | 1,18  | 2,27  | 0,07149 | NR_002962    | MLL5      |
| 8135277 | 2,78 | 6,85 | 0,00232 | 2,54  | 5,82  | 0,00024 | NM_182931    | BUB3      |
| 7931187 | 2,78 | 6,85 | 0,01725 | 4,44  | 21,65 | 0,00074 | NM_004725    | PLRG1     |
| 8103289 | 2,77 | 6,84 | 0,00155 | 2,79  | 6,92  | 0,00028 | NM_002669    | PSME3     |
| 8007397 | 2,77 | 6,83 | 0,01264 | 3,49  | 11,25 | 0,00003 | NM_176863    | LAYN      |
| 7943749 | 2,77 | 6,83 | 0,00039 | -0,61 | -1,52 | 0,00552 | NM_178834    | PCNP      |
| 8081348 | 2,77 | 6,83 | 0,02085 | 2,80  | 6,94  | 0,00464 | NM_020357    | C1orf21   |
| 7908161 | 2,77 | 6,83 | 0,01209 | 1,82  | 3,52  | 0,00116 | NM_030806    | PAK2      |
| 8084963 | 2,77 | 6,83 | 0,02254 | 4,59  | 24,07 | 0,00032 | NM_002577    | NRBF2     |
| 7927775 | 2,77 | 6,82 | 0,00565 | 0,39  | 1,31  | 0,04329 | NM_030759    | SMAP1     |
| 8120585 | 2,77 | 6,82 | 0,00237 | 2,32  | 5,01  | 0,00500 | NM_001044305 | PDHX      |
| 7939329 | 2,77 | 6,82 | 0,02577 | 2,51  | 5,70  | 0,00843 | NM_003477    | TM2D2     |
| 8150364 | 2,77 | 6,82 | 0,00568 | 3,71  | 13,11 | 0,00086 | NM_031940    | DPYSL2    |
| 8145470 | 2,77 | 6,81 | 0,00747 | 3,13  | 8,78  | 0,00338 | NM_001386    | EAF1      |
| 8078138 | 2,77 | 6,81 | 0,00959 | 2,90  | 7,48  | 0,00208 | NM_033083    | RRN3      |
| 7994565 | 2,77 | 6,81 | 0,01231 | 3,72  | 13,21 | 0,00376 | NM_018427    | GBF1      |
| 7930031 | 2,77 | 6,81 | 0,00136 | 3,08  | 8,43  | 0,00048 | NM_004193    | C6orf203  |
| 8121312 | 2,77 | 6,81 | 0,00049 | 0,80  | 1,75  | 0,19813 | NM_016487    | ATP5A1    |
| 8023063 | 2,77 | 6,80 | 0,00130 | 2,20  | 4,60  | 0,00704 | NM_001001937 | CSNK1D    |
| 8019463 | 2,77 | 6,80 | 0,00557 | 2,72  | 6,60  | 0,00046 | NM_139062    | LRBA      |
| 8103106 | 2,77 | 6,80 | 0,00556 | 3,60  | 12,10 | 0,00108 | NM_006726    | LRRRC8D   |
| 7902883 | 2,76 | 6,79 | 0,00957 | 3,04  | 8,23  | 0,00002 | NM_001134479 | TAF1D     |
| 7951008 | 2,76 | 6,79 | 0,00059 | 1,94  | 3,83  | 0,03363 | NM_024116    | HCFC2     |
| 7958158 | 2,76 | 6,79 | 0,01584 | 2,19  | 4,57  | 0,00314 | NM_013320    | GPN1      |
| 8041000 | 2,76 | 6,77 | 0,01682 | 3,11  | 8,63  | 0,00011 | NM_007266    | TTC33     |
| 8111788 | 2,76 | 6,76 | 0,00800 | 1,53  | 2,89  | 0,00661 | NM_012382    | KIAA1191  |
| 8115895 | 2,76 | 6,76 | 0,00302 | 3,86  | 14,50 | 0,00073 | NM_020444    | YEATS4    |
| 7957032 | 2,76 | 6,76 | 0,01522 | 2,00  | 3,99  | 0,00878 | NM_006530    | PAN3      |
| 7968274 | 2,76 | 6,76 | 0,00258 | 3,49  | 11,22 | 0,00102 | NM_175854    | HERC3     |
| 8096385 | 2,76 | 6,76 | 0,02491 | 1,21  | 2,31  | 0,00577 | NM_014606    | PACSIN2   |
| 8076533 | 2,76 | 6,76 | 0,00390 | 2,37  | 5,18  | 0,00267 | NM_007229    | CIAPIN1   |
| 8001552 | 2,76 | 6,76 | 0,00013 | 3,31  | 9,88  | 0,00614 | NM_020313    | SLIT3     |
| 8115691 | 2,76 | 6,75 | 0,02695 | -1,55 | -2,93 | 0,00252 | NM_003062    | ABHD10    |
| 8081612 | 2,75 | 6,75 | 0,02954 | 3,16  | 8,92  | 0,00061 | NM_018394    | USP8      |
| 7983663 | 2,75 | 6,75 | 0,01123 | 3,50  | 11,30 | 0,00326 | NM_005154    | RARRES3   |
| 7940775 | 2,75 | 6,74 | 0,00782 | 0,21  | 1,16  | 0,40963 | NM_004585    | ZC3HAV1   |
| 8143279 | 2,75 | 6,73 | 0,00897 | 2,78  | 6,86  | 0,00265 | NM_020119    | CAMSAP1L1 |
| 7908614 | 2,75 | 6,72 | 0,00138 | 4,02  | 16,18 | 0,00222 | NM_203459    | PMS2L5    |
| 8133309 | 2,75 | 6,72 | 0,04889 | 4,12  | 17,41 | 0,00021 | NR_027776    | SDHD      |
| 7943853 | 2,75 | 6,72 | 0,00022 | 3,63  | 12,39 | 0,00078 | NM_003002    | CKAP2     |
| 7969243 | 2,75 | 6,71 | 0,00153 | 3,07  | 8,41  | 0,00819 | NM_018204    | SMAD3     |

|                                              |      |      |         |       |       |         |                                 |                     |
|----------------------------------------------|------|------|---------|-------|-------|---------|---------------------------------|---------------------|
| 7984364                                      | 2,74 | 6,69 | 0,02062 | 3,60  | 12,14 | 0,00012 | NM_005902                       | TMEM188             |
| 7995448                                      | 2,74 | 6,69 | 0,01049 | 4,54  | 23,26 | 0,00008 | NM_153261                       | TMEM14B             |
| 8116867                                      | 2,74 | 6,69 | 0,09022 | 5,61  | 48,76 | 0,00002 | NM_030969                       | PUM1                |
| 7914296                                      | 2,74 | 6,69 | 0,01513 | 4,10  | 17,21 | 0,00039 | NM_001020658                    | IFIT2               |
| 7929047                                      | 2,74 | 6,69 | 0,00319 | -0,27 | -1,20 | 0,02025 | NM_001547                       | PTDSS1              |
| 8147447                                      | 2,74 | 6,68 | 0,00704 | 4,57  | 23,68 | 0,00006 | NM_014754                       | ALG9                |
| 7951633                                      | 2,74 | 6,68 | 0,00331 | 3,22  | 9,32  | 0,00033 | NM_024740                       | CH25H               |
| 7934916                                      | 2,74 | 6,67 | 0,05538 | -0,45 | -1,36 | 0,00463 | NM_003956                       | CADPS2              |
| 8142585                                      | 2,74 | 6,67 | 0,01736 | 1,23  | 2,35  | 0,00259 | NM_017954                       | CCT7                |
| 8042720                                      | 2,74 | 6,67 | 0,01084 | 4,24  | 18,89 | 0,00005 | NM_006429                       | CDH13               |
| 7997504                                      | 2,74 | 6,67 | 0,00381 | -1,39 | -2,62 | 0,00957 | NM_001257                       | ERAP1               |
| 8113250                                      | 2,74 | 6,67 | 0,00863 | 3,75  | 13,46 | 0,00072 | NM_001040458                    | ZNF121              |
| 8033789                                      | 2,74 | 6,67 | 0,00130 | 2,75  | 6,71  | 0,00118 | NM_001008727                    | C6orf89             |
| 8119109                                      | 2,74 | 6,66 | 0,00395 | 2,44  | 5,41  | 0,00470 | NM_152734                       | DDX52               |
| 8014574                                      | 2,74 | 6,66 | 0,01383 | 4,30  | 19,70 | 0,00002 | NM_007010                       | PIK3CB              |
| 8091009                                      | 2,73 | 6,65 | 0,00624 | 3,93  | 15,29 | 0,00079 | NM_006219                       | DYNLL1              |
| 7959164                                      | 2,73 | 6,65 | 0,00601 | 3,09  | 8,54  | 0,00496 | NM_001037495                    | GANAB               |
| 7948744                                      | 2,73 | 6,64 | 0,00195 | 4,02  | 16,27 | 0,00063 | NM_198335                       | LMBRD2              |
| 8111533                                      | 2,73 | 6,64 | 0,00339 | 3,51  | 11,42 | 0,00210 | NM_001007527                    | ASAP2               |
| 8040113                                      | 2,73 | 6,64 | 0,01154 | 4,77  | 27,28 | 0,00000 | NM_003887                       | KIAA1429            |
| 8151842                                      | 2,73 | 6,63 | 0,00190 | 2,86  | 7,28  | 0,00237 | NM_015496                       | EIF2S1              |
| 7975224                                      | 2,73 | 6,63 | 0,01113 | 4,60  | 24,18 | 0,00206 | NM_004094                       | PPP1R15B            |
| 7923659                                      | 2,73 | 6,63 | 0,00468 | 3,74  | 13,33 | 0,00006 | NM_032833                       | RWDD2B              |
| 8069744                                      | 2,73 | 6,63 | 0,05660 | 3,32  | 9,98  | 0,00087 | NM_016940                       | CDK12               |
| 8006850                                      | 2,73 | 6,62 | 0,00027 | 2,78  | 6,87  | 0,01088 | NM_016507                       | LARP4B              |
| 7931728                                      | 2,73 | 6,62 | 0,00054 | 3,62  | 12,33 | 0,00054 | NM_015155                       | CALD1               |
| 8136347                                      | 2,73 | 6,61 | 0,00080 | -0,10 | -1,07 | 0,55008 | NM_033138                       | C1orf9              |
| 7907404                                      | 2,73 | 6,61 | 0,01544 | 3,49  | 11,22 | 0,00245 | NM_014283                       | AARS                |
| 8002347                                      | 2,72 | 6,61 | 0,00338 | 4,34  | 20,21 | 0,00390 | NM_001605                       | NOC3L               |
| 7935146                                      | 2,72 | 6,61 | 0,01260 | 2,79  | 6,93  | 0,00066 | NM_022451                       | RB1CC1              |
| 8150757                                      | 2,72 | 6,61 | 0,00597 | 2,73  | 6,64  | 0,00037 | NM_014781                       | PSMD2               |
| 8084423                                      | 2,72 | 6,60 | 0,00684 | 3,19  | 9,10  | 0,00103 | NM_002808                       | ANLN                |
| 8132318                                      | 2,72 | 6,60 | 0,00051 | 3,05  | 8,29  | 0,03007 | NM_018685                       | C9orf102            |
| 8156604                                      | 2,72 | 6,59 | 0,00047 | 1,25  | 2,37  | 0,13229 | BC022957                        | CLASP1              |
| 8054888                                      | 2,72 | 6,59 | 0,00179 | 3,27  | 9,66  | 0,00020 | NM_015282                       | ATP8B1              |
| 8023497                                      | 2,72 | 6,58 | 0,00326 | 2,17  | 4,49  | 0,00045 | NM_005603                       | TGOLN2              |
| 8053388                                      | 2,72 | 6,58 | 0,00069 | 1,67  | 3,19  | 0,00246 | NM_006464                       | C7orf60             |
| 8142415                                      | 2,72 | 6,58 | 0,02216 | 3,30  | 9,87  | 0,00073 | NM_152556                       | PCMTD2              |
| 7927095                                      | 2,72 | 6,58 | 0,07823 | 2,32  | 4,99  | 0,19754 | BC032332                        | CRTAP               |
| 8078450                                      | 2,72 | 6,58 | 0,00227 | 3,24  | 9,46  | 0,00061 | NM_006371                       | ARHGAP29            |
| 7917850                                      | 2,72 | 6,57 | 0,00766 | 3,75  | 13,44 | 0,00028 | NM_004815                       | BBS9                |
| 8132218                                      | 2,72 | 6,57 | 0,01389 | 2,07  | 4,20  | 0,01254 | NM_198428                       | PCNX                |
| 7975416                                      | 2,72 | 6,57 | 0,00746 | 3,62  | 12,31 | 0,00032 | NM_014982                       | SAMHD1              |
| 8066117                                      | 2,72 | 6,57 | 0,00531 | 2,44  | 5,42  | 0,00009 | NM_015474                       | ARMCX6              |
| 8168873                                      | 2,71 | 6,57 | 0,00743 | 2,18  | 4,53  | 0,02010 | NM_019007                       | LSM3                |
| 8078008                                      | 2,71 | 6,56 | 0,00449 | 3,34  | 10,15 | 0,00019 | NM_014463                       | BPTF                |
| 8009382                                      | 2,71 | 6,56 | 0,00186 | 2,66  | 6,31  | 0,00835 | NM_004459                       | CD63                |
| 7963911                                      | 2,71 | 6,56 | 0,00095 | 1,33  | 2,51  | 0,02114 | NM_001780                       | NR1D2               |
| 8078272                                      | 2,71 | 6,56 | 0,02796 | 3,25  | 9,52  | 0,00390 | NM_005126                       | NCSTN               |
| 7906576                                      | 2,71 | 6,55 | 0,00871 | 3,65  | 12,59 | 0,00116 | NM_015331                       | GDE1                |
| 7999889                                      | 2,71 | 6,55 | 0,00285 | 3,16  | 8,92  | 0,00479 | NM_016641                       | SKAP2               |
| 8138689                                      | 2,71 | 6,55 | 0,00244 | 4,03  | 16,35 | 0,00028 | NM_003930                       | IRAK3               |
| 7956878                                      | 2,71 | 6,55 | 0,01833 | 3,01  | 8,06  | 0,00060 | NM_007199                       | HIST1H2BF           |
| 8117395                                      | 2,71 | 6,54 | 0,01171 | 2,81  | 7,02  | 0,00595 | NM_003522                       | ZADH2               |
| 8023871                                      | 2,71 | 6,54 | 0,00048 | 0,28  | 1,21  | 0,23841 | NM_175907                       | QSOX1               |
| 7907830                                      | 2,71 | 6,54 | 0,01207 | 2,35  | 5,08  | 0,00795 | NM_002826                       | KTN1                |
| 7974483                                      | 2,71 | 6,54 | 0,00162 | 2,34  | 5,06  | 0,00204 | NM_182926                       | MLH1                |
| 8078544                                      | 2,71 | 6,54 | 0,01474 | 2,85  | 7,23  | 0,00135 | NM_000249                       | MIER3               |
| 8112182                                      | 2,71 | 6,53 | 0,00117 | 1,42  | 2,68  | 0,02529 | NM_152622                       | C19orf56            |
| 8034448                                      | 2,71 | 6,52 | 0,01233 | 2,69  | 6,46  | 0,00023 | NM_016145                       | MRPL15              |
| 8146448                                      | 2,71 | 6,52 | 0,02059 | 3,46  | 10,97 | 0,00231 | NM_014175                       | WDFY1               |
| 8059361                                      | 2,71 | 6,52 | 0,01118 | 2,03  | 4,10  | 0,00073 | NM_020830                       | FOX2                |
| 8135544                                      | 2,70 | 6,52 | 0,03352 | 0,55  | 1,46  | 0,16379 | NM_148898                       | MSL3L2 // MSL3L2 // |
| MSL3L2 // MSL3L2 // MSL3L2                   |      |      |         |       |       |         |                                 |                     |
| 8059852                                      | 2,70 | 6,51 | 0,00128 | -0,11 | -1,08 | 0,81040 | NM_001166217 // NM_001166217 // |                     |
| NM_001166217 // NM_001166217 // NM_001166217 |      |      |         |       |       |         |                                 | GRB10               |
| 8139656                                      | 2,70 | 6,51 | 0,00161 | 3,91  | 15,07 | 0,00001 | NM_001001555                    | KCTD20              |
| 8119067                                      | 2,70 | 6,51 | 0,01013 | 4,66  | 25,27 | 0,00097 | NM_173562                       | RPS25               |
| 8113660                                      | 2,70 | 6,51 | 0,00153 | 1,93  | 3,80  | 0,07940 | NM_001028                       | NEU1                |
| 8125139                                      | 2,70 | 6,51 | 0,00155 | 2,20  | 4,59  | 0,00502 | NM_000434                       | NEU1                |
| 8179851                                      | 2,70 | 6,51 | 0,00155 | 2,20  | 4,59  | 0,00502 | NM_000434                       | HLA-DPA1            |
| 8180100                                      | 2,70 | 6,51 | 0,00125 | 1,44  | 2,72  | 0,00120 | NM_033554                       | P4HA2               |
| 8113981                                      | 2,70 | 6,50 | 0,00459 | 2,58  | 5,96  | 0,00001 | NM_004199                       | UBR5                |

|         |      |      |         |       |       |         |                 |              |
|---------|------|------|---------|-------|-------|---------|-----------------|--------------|
| 8152148 | 2,70 | 6,50 | 0,00201 | 3,47  | 11,07 | 0,00741 | NM_015902       | MEA1         |
| 8126474 | 2,70 | 6,50 | 0,00207 | 1,72  | 3,29  | 0,00385 | NM_014623       | KIAA0196     |
| 8152782 | 2,70 | 6,50 | 0,00858 | 3,36  | 10,30 | 0,00291 | NM_014846       | GALNT13      |
| 8045776 | 2,70 | 6,50 | 0,04157 | -0,99 | -1,99 | 0,00001 | NM_052917       | CAB39        |
| 8048980 | 2,70 | 6,50 | 0,00426 | 2,77  | 6,83  | 0,00184 | NM_016289       | YTHDF1       |
| 8067593 | 2,70 | 6,50 | 0,00053 | 4,30  | 19,71 | 0,00041 | NM_017798       | DDX58        |
| 8160559 | 2,70 | 6,50 | 0,01331 | 1,61  | 3,05  | 0,01350 | NM_014314       | ROBO1        |
| 8088919 | 2,70 | 6,50 | 0,02231 | -1,53 | -2,88 | 0,00001 | NM_133631       | MAPKAP1      |
| 8164177 | 2,70 | 6,49 | 0,00191 | 2,95  | 7,71  | 0,00015 | NM_001006617    | BMPRI1A      |
| 7928855 | 2,70 | 6,49 | 0,00476 | 3,69  | 12,89 | 0,00082 | NM_004329       | BDKRB1       |
| 7976567 | 2,70 | 6,49 | 0,00351 | -0,47 | -1,39 | 0,10756 | NM_000710       | ASCC2        |
| 8075285 | 2,70 | 6,48 | 0,00569 | 3,34  | 10,13 | 0,00085 | NM_032204       | STAMBP       |
| 8042772 | 2,70 | 6,48 | 0,00240 | 2,64  | 6,25  | 0,00092 | NM_213622       | CDK17        |
| 7965652 | 2,70 | 6,48 | 0,00264 | 3,87  | 14,63 | 0,00014 | NM_002595       | C9orf30      |
| 8156897 | 2,70 | 6,48 | 0,01356 | 3,00  | 8,02  | 0,00181 | BC008993 TAB2   |              |
| 8122672 | 2,69 | 6,47 | 0,00253 | 2,82  | 7,08  | 0,00692 | NM_015093       | ABCB7        |
| 8173629 | 2,69 | 6,47 | 0,02577 | 3,77  | 13,62 | 0,00002 | NM_004299       | G3BP2        |
| 8101043 | 2,69 | 6,46 | 0,00403 | 2,63  | 6,21  | 0,00012 | NM_203505       | BVES         |
| 8128553 | 2,69 | 6,45 | 0,02050 | 3,08  | 8,44  | 0,00134 | NM_147147       | NDUFS4       |
| 8105311 | 2,69 | 6,45 | 0,05362 | 2,39  | 5,25  | 0,00040 | NM_002495       | GCSH         |
| 7922104 | 2,69 | 6,45 | 0,00885 | 2,90  | 7,47  | 0,00684 | NM_004483       | C11orf57     |
| 7943842 | 2,69 | 6,45 | 0,00716 | 2,57  | 5,92  | 0,00303 | NM_018195       | LMO7         |
| 7969438 | 2,69 | 6,45 | 0,00838 | 2,46  | 5,51  | 0,00267 | NM_005358       | SQRDL        |
| 7983512 | 2,69 | 6,44 | 0,00056 | 3,12  | 8,71  | 0,00115 | NM_021199       | FAM104A      |
| 8018097 | 2,69 | 6,44 | 0,00103 | 3,81  | 14,01 | 0,00002 | NM_001098832    | ATP11C       |
| 8175492 | 2,69 | 6,44 | 0,01416 | 2,72  | 6,58  | 0,00055 | NM_173694       | VGLL3        |
| 8088979 | 2,69 | 6,43 | 0,00510 | -0,90 | -1,87 | 0,00013 | NM_016206       | UHMK1        |
| 7906852 | 2,68 | 6,43 | 0,00663 | 2,35  | 5,09  | 0,00047 | NM_175866       | XPNPPE1      |
| 7936284 | 2,68 | 6,43 | 0,00915 | 2,99  | 7,94  | 0,00000 | NM_020383       | TMX1         |
| 7974303 | 2,68 | 6,43 | 0,01680 | 3,32  | 9,96  | 0,00439 | NM_030755       | MRPL48       |
| 7942465 | 2,68 | 6,43 | 0,02104 | 2,41  | 5,32  | 0,00624 | NM_016055       | TBRG1        |
| 7944850 | 2,68 | 6,43 | 0,02125 | 3,50  | 11,28 | 0,00062 | NM_032811       | NPR3         |
| 8104746 | 2,68 | 6,42 | 0,00679 | 0,21  | 1,16  | 0,28189 | NM_000908       | PPT1         |
| 7915286 | 2,68 | 6,42 | 0,02806 | 4,59  | 24,15 | 0,00000 | NM_000310       | SMG7         |
| 7908097 | 2,68 | 6,42 | 0,01342 | 3,21  | 9,23  | 0,00112 | NM_173156       | FNIP2        |
| 8098103 | 2,68 | 6,42 | 0,00125 | 1,63  | 3,10  | 0,03204 | NM_020840       | SGCB         |
| 8100318 | 2,68 | 6,41 | 0,06306 | 2,24  | 4,72  | 0,00045 | NM_000232       | ZRANB2       |
| 7916969 | 2,68 | 6,41 | 0,00465 | 2,54  | 5,80  | 0,00153 | NM_005455       | SKP2         |
| 8104912 | 2,68 | 6,41 | 0,00593 | 3,93  | 15,29 | 0,00597 | NM_005983       | WEE1         |
| 7938348 | 2,68 | 6,41 | 0,00052 | 1,75  | 3,36  | 0,01754 | NM_003390       | DYNC1H1      |
| 7976876 | 2,68 | 6,41 | 0,01361 | 2,87  | 7,32  | 0,01261 | NM_001376       | SMAD2        |
| 8023191 | 2,68 | 6,40 | 0,00996 | 2,86  | 7,28  | 0,00818 | NM_005901       | GLUL         |
| 8154951 | 2,68 | 6,40 | 0,01582 | 1,65  | 3,14  | 0,05886 | NM_002065       | MYST2        |
| 8008213 | 2,68 | 6,40 | 0,00099 | 3,57  | 11,89 | 0,00230 | NM_007067       | RPL18        |
| 8038086 | 2,68 | 6,39 | 0,01791 | 3,62  | 12,33 | 0,00220 | NM_000979       | TWF1         |
| 7962441 | 2,67 | 6,39 | 0,00373 | 1,63  | 3,10  | 0,00099 | NM_002822       | BTG2         |
| 7908917 | 2,67 | 6,38 | 0,02009 | 1,62  | 3,08  | 0,00753 | NM_006763       | COMMD3       |
| 7926596 | 2,67 | 6,38 | 0,00356 | 1,10  | 2,15  | 0,05093 | NM_012071       | ZNF302       |
| 8027674 | 2,67 | 6,38 | 0,00066 | 2,14  | 4,40  | 0,00479 | NM_018443       | FAM120B      |
| 8123494 | 2,67 | 6,38 | 0,00088 | 1,50  | 2,83  | 0,00696 | NM_032448       | ORMDL1       |
| 8057700 | 2,67 | 6,38 | 0,00903 | 3,40  | 10,52 | 0,00041 | NM_016467       | CSGALNACT2   |
| 7927146 | 2,67 | 6,38 | 0,00801 | 2,53  | 5,76  | 0,00183 | NM_018590       | PODN         |
| 7901535 | 2,67 | 6,38 | 0,02205 | -0,60 | -1,51 | 0,00189 | NM_153703       | HSPA4        |
| 8108015 | 2,67 | 6,37 | 0,02524 | 2,55  | 5,85  | 0,00010 | NM_002154       | RAB35        |
| 7966929 | 2,67 | 6,37 | 0,00050 | 2,90  | 7,47  | 0,00174 | NM_006861       | LOC100132992 |
| 8023526 | 2,67 | 6,37 | 0,04546 | 3,43  | 10,80 | 0,00078 | ENST00000446244 | DEK          |
| 8124144 | 2,67 | 6,36 | 0,00006 | 3,10  | 8,55  | 0,01201 | NM_003472       | NCBP1        |
| 8156718 | 2,67 | 6,36 | 0,01488 | 3,88  | 14,77 | 0,00020 | NM_002486       | LIN52        |
| 7975687 | 2,66 | 6,34 | 0,01084 | 3,12  | 8,69  | 0,00278 | NM_001024674    | RGPD4        |
| 8044161 | 2,66 | 6,34 | 0,00272 | 1,59  | 3,01  | 0,03902 | NM_182588       | SPCS3        |
| 8098414 | 2,66 | 6,34 | 0,02278 | 2,45  | 5,46  | 0,00062 | NM_021928       | ASAM         |
| 7952341 | 2,66 | 6,34 | 0,00539 | 0,90  | 1,87  | 0,00286 | NM_024769       | ATP2C1       |
| 8082607 | 2,66 | 6,34 | 0,00518 | 2,15  | 4,44  | 0,00028 | NM_014382       | ASNA1        |
| 8026024 | 2,66 | 6,34 | 0,02190 | 3,46  | 11,00 | 0,00004 | NM_004317       | VPS13C       |
| 7989387 | 2,66 | 6,33 | 0,00330 | 2,48  | 5,57  | 0,00140 | NM_020821       | UFSP2        |
| 8103998 | 2,66 | 6,33 | 0,02947 | 2,22  | 4,64  | 0,00337 | NM_018359       | DHCR24       |
| 7916432 | 2,66 | 6,33 | 0,01707 | 4,90  | 29,96 | 0,00008 | NM_014762       | LIN7C        |
| 7947221 | 2,66 | 6,33 | 0,01210 | 1,50  | 2,84  | 0,02706 | NM_018362       | CRIM1        |
| 8041447 | 2,66 | 6,32 | 0,00043 | 2,94  | 7,66  | 0,02427 | NM_016441       | SLBP         |
| 8098904 | 2,66 | 6,32 | 0,00779 | 1,88  | 3,67  | 0,00491 | NM_006527       | SKA2         |
| 8157691 | 2,66 | 6,32 | 0,02414 | 4,44  | 21,72 | 0,00185 | NM_182620       | C10orf46     |
| 7936596 | 2,66 | 6,31 | 0,00046 | 2,31  | 4,96  | 0,00241 | NM_153810       | TLR3         |
| 8098611 | 2,66 | 6,31 | 0,00424 | 0,33  | 1,26  | 0,38407 | NM_003265       | TAF11        |

|         |      |      |         |       |       |         |                 |           |
|---------|------|------|---------|-------|-------|---------|-----------------|-----------|
| 8125859 | 2,66 | 6,31 | 0,03188 | 4,06  | 16,71 | 0,00033 | NM_005643       | LPCAT2    |
| 7995697 | 2,66 | 6,31 | 0,00695 | 0,69  | 1,62  | 0,18866 | NM_017839       | ATP10D    |
| 8094911 | 2,66 | 6,31 | 0,01478 | 2,45  | 5,46  | 0,00484 | NM_020453       | RRN3P1    |
| 8000200 | 2,66 | 6,30 | 0,01755 | 3,66  | 12,64 | 0,00746 | NR_003370       | PDE1A     |
| 8057486 | 2,66 | 6,30 | 0,00228 | -0,95 | -1,94 | 0,00084 | NM_005019       | ZYG11B    |
| 7901479 | 2,65 | 6,30 | 0,03293 | 3,48  | 11,13 | 0,00060 | NM_024646       | PPIP5K2   |
| 8107164 | 2,65 | 6,30 | 0,02555 | 2,54  | 5,83  | 0,00712 | NM_015216       | C5orf44   |
| 8105647 | 2,65 | 6,29 | 0,03907 | 3,10  | 8,54  | 0,00336 | NM_001093755    | VPS36     |
| 7971820 | 2,65 | 6,28 | 0,00405 | 1,90  | 3,73  | 0,00061 | NM_016075       | PCMTD2    |
| 7924549 | 2,65 | 6,28 | 0,02423 | 2,47  | 5,53  | 0,18487 | BC032332 PCMTD2 |           |
| 8049963 | 2,65 | 6,28 | 0,02423 | 2,47  | 5,53  | 0,18487 | BC032332 MRPL3  |           |
| 8090678 | 2,65 | 6,28 | 0,00053 | 3,44  | 10,86 | 0,00001 | NM_007208       | NACA      |
| 7964262 | 2,65 | 6,27 | 0,04345 | 1,69  | 3,23  | 0,02489 | NM_001113201    | ---       |
| 8058333 | 2,65 | 6,27 | 0,00899 | 3,75  | 13,48 | 0,00106 | --- ZNF828      |           |
| 7970376 | 2,65 | 6,27 | 0,05263 | -1,10 | -2,15 | 0,00021 | NM_032436       | GCNT4     |
| 8112668 | 2,65 | 6,27 | 0,00735 | 0,20  | 1,15  | 0,41594 | NM_016591       | HUS1      |
| 8139592 | 2,65 | 6,27 | 0,00039 | 3,59  | 12,05 | 0,00163 | NM_004507       | FAIM2     |
| 7963142 | 2,65 | 6,27 | 0,03492 | -1,71 | -3,28 | 0,00437 | NM_012306       | NFKBIA    |
| 7978644 | 2,65 | 6,26 | 0,04978 | 3,92  | 15,12 | 0,00083 | NM_020529       | TTC27     |
| 8041360 | 2,65 | 6,26 | 0,00392 | 3,51  | 11,43 | 0,00016 | NM_017735       | SACS      |
| 7970569 | 2,65 | 6,26 | 0,03987 | 3,07  | 8,38  | 0,00040 | NM_014363       | DYNC1L12  |
| 8001841 | 2,65 | 6,26 | 0,01113 | 3,06  | 8,36  | 0,00041 | NM_006141       | AFTPH     |
| 8042291 | 2,65 | 6,26 | 0,00165 | 2,48  | 5,56  | 0,00367 | NM_203437       | ATP5B     |
| 7964234 | 2,65 | 6,26 | 0,01145 | 4,19  | 18,30 | 0,00240 | NM_001686       | SLC25A13  |
| 8141107 | 2,65 | 6,26 | 0,01507 | 2,79  | 6,91  | 0,00083 | NM_001160210    | SYNPO2    |
| 8097080 | 2,64 | 6,25 | 0,00560 | -1,44 | -2,72 | 0,00134 | NM_133477       | ANKMY2    |
| 8138370 | 2,64 | 6,25 | 0,04786 | 2,85  | 7,19  | 0,00310 | NM_020319       | RPS16     |
| 8036737 | 2,64 | 6,25 | 0,02582 | 3,11  | 8,65  | 0,00141 | NM_001020       | PSMA2     |
| 8139232 | 2,64 | 6,24 | 0,00888 | 3,56  | 11,76 | 0,00426 | NM_002787       | TAGLN     |
| 7944082 | 2,64 | 6,24 | 0,02363 | -1,52 | -2,86 | 0,00153 | NM_001001522    | TFB2M     |
| 7925611 | 2,64 | 6,24 | 0,01260 | 2,20  | 4,59  | 0,04134 | NM_022366       | HDAC2     |
| 8129045 | 2,64 | 6,24 | 0,01524 | 2,91  | 7,50  | 0,00722 | NM_001527       | DYNLT3    |
| 8172035 | 2,64 | 6,24 | 0,02129 | 1,88  | 3,69  | 0,00026 | NM_006520       | SFRS7     |
| 8051622 | 2,64 | 6,24 | 0,01113 | 3,04  | 8,22  | 0,00043 | NM_001031684    | MED13L    |
| 7966706 | 2,64 | 6,24 | 0,00947 | 4,60  | 24,17 | 0,00054 | NM_015335       | TMEM138   |
| 7940473 | 2,64 | 6,23 | 0,04608 | 5,21  | 36,94 | 0,00027 | NM_016464       | CLPTM1    |
| 8029560 | 2,64 | 6,22 | 0,00378 | 3,99  | 15,84 | 0,00099 | NM_001294       | EIF2C3    |
| 7900051 | 2,64 | 6,22 | 0,00535 | 3,15  | 8,85  | 0,00010 | NM_024852       | SDF2      |
| 8013741 | 2,64 | 6,22 | 0,01513 | 4,01  | 16,09 | 0,00520 | NM_006923       | LASS2     |
| 7919856 | 2,64 | 6,22 | 0,00781 | 3,96  | 15,58 | 0,00034 | NM_181746       | MFSD8     |
| 8102730 | 2,64 | 6,22 | 0,01497 | 3,82  | 14,14 | 0,00021 | NM_152778       | DHRS3     |
| 7912537 | 2,63 | 6,21 | 0,00650 | 0,98  | 1,98  | 0,04975 | NM_004753       | NQO2      |
| 8116610 | 2,63 | 6,21 | 0,00422 | 3,83  | 14,21 | 0,00205 | NM_000904       | PPP4R2    |
| 8080973 | 2,63 | 6,21 | 0,00086 | 1,43  | 2,70  | 0,01101 | NM_174907       | NUDT5     |
| 7932069 | 2,63 | 6,20 | 0,04111 | 4,18  | 18,12 | 0,00007 | NM_014142       | SMAD5     |
| 8108238 | 2,63 | 6,20 | 0,01976 | 4,07  | 16,82 | 0,00030 | NM_001001419    | CEP350    |
| 7907790 | 2,63 | 6,20 | 0,00082 | 2,77  | 6,81  | 0,01051 | NM_014810       | CCDC88A   |
| 8052269 | 2,63 | 6,20 | 0,00954 | 2,78  | 6,89  | 0,00196 | NM_001135597    | HIST1H2BH |
| 8117426 | 2,63 | 6,20 | 0,02987 | -0,96 | -1,95 | 0,18146 | NM_003524       | HSPB1     |
| 8133721 | 2,63 | 6,20 | 0,03743 | 2,99  | 7,94  | 0,00438 | NM_001540       | ---       |
| 8150204 | 2,63 | 6,19 | 0,00219 | 2,18  | 4,53  | 0,00378 | --- PRMT5       |           |
| 7977820 | 2,63 | 6,19 | 0,01186 | 5,17  | 35,89 | 0,00042 | NM_001039619    | EHBP1     |
| 8042223 | 2,63 | 6,18 | 0,01033 | 4,19  | 18,28 | 0,00048 | NM_015252       | SRGN      |
| 7927964 | 2,63 | 6,18 | 0,01754 | 0,14  | 1,10  | 0,68941 | NM_002727       | CHPT1     |
| 7958000 | 2,63 | 6,18 | 0,00031 | 3,25  | 9,54  | 0,00379 | NM_020244       | SNRPD1    |
| 8020411 | 2,63 | 6,18 | 0,03022 | 3,30  | 9,88  | 0,00162 | NM_006938       | EPC1      |
| 7932938 | 2,63 | 6,17 | 0,00854 | 3,09  | 8,49  | 0,00316 | NM_025209       | FTH1      |
| 8170360 | 2,63 | 6,17 | 0,07281 | 2,14  | 4,41  | 0,00732 | NM_002032       | KIAA0430  |
| 7999642 | 2,63 | 6,17 | 0,00856 | 2,69  | 6,43  | 0,00468 | NM_014647       | RPL35A    |
| 8085026 | 2,62 | 6,16 | 0,00710 | 3,42  | 10,69 | 0,00385 | NM_000996       | PRKAG2    |
| 8143961 | 2,62 | 6,16 | 0,00536 | 2,36  | 5,14  | 0,00660 | NM_016203       | STAU1     |
| 8066889 | 2,62 | 6,16 | 0,00435 | 3,84  | 14,36 | 0,00137 | NM_017453       | TARS      |
| 8104760 | 2,62 | 6,16 | 0,00389 | 3,19  | 9,12  | 0,00174 | NM_152295       | SLC25A38  |
| 8078898 | 2,62 | 6,15 | 0,04230 | 2,73  | 6,64  | 0,00025 | NM_017875       | RFC1      |
| 8099860 | 2,62 | 6,15 | 0,00755 | 2,65  | 6,28  | 0,00029 | NM_002913       | SMARCC1   |
| 8086810 | 2,62 | 6,15 | 0,00134 | 2,86  | 7,27  | 0,01728 | NM_003074       | NYNRIN    |
| 7973727 | 2,62 | 6,14 | 0,01887 | -1,36 | -2,57 | 0,13705 | NM_025081       | FTL       |
| 8030171 | 2,62 | 6,14 | 0,01001 | 3,17  | 8,97  | 0,02479 | NM_000146       | IDS       |
| 8170390 | 2,62 | 6,14 | 0,00575 | 2,43  | 5,38  | 0,00315 | NM_000202       | SCO1      |
| 8012823 | 2,62 | 6,13 | 0,01085 | 3,20  | 9,17  | 0,00510 | NM_004589       | ASH1L     |
| 7920766 | 2,62 | 6,13 | 0,00787 | 3,21  | 9,23  | 0,02958 | NM_018489       | C1orf25   |
| 7922870 | 2,62 | 6,13 | 0,00211 | 2,61  | 6,12  | 0,00269 | NM_030934       | STEAP1    |
| 8134030 | 2,62 | 6,13 | 0,01257 | 2,51  | 5,71  | 0,00201 | NM_012449       | ASCC3     |

|         |      |      |         |       |       |         |                 |            |
|---------|------|------|---------|-------|-------|---------|-----------------|------------|
| 8128472 | 2,62 | 6,13 | 0,01568 | 2,12  | 4,35  | 0,00102 | NM_006828       | TMEM63B    |
| 8119926 | 2,62 | 6,13 | 0,00688 | 4,15  | 17,70 | 0,00026 | NM_018426       | MBOAT2     |
| 8050160 | 2,62 | 6,13 | 0,00116 | 3,56  | 11,78 | 0,00061 | NM_138799       | RAVER2     |
| 7902023 | 2,61 | 6,13 | 0,00427 | 3,62  | 12,28 | 0,00060 | NM_018211       | SR140      |
| 8083183 | 2,61 | 6,12 | 0,00196 | 3,10  | 8,56  | 0,00347 | NM_001080415    | SPATA6     |
| 7915955 | 2,61 | 6,11 | 0,02221 | 2,75  | 6,74  | 0,00422 | NM_019073       | ZNF295     |
| 8070557 | 2,61 | 6,11 | 0,01390 | 2,90  | 7,44  | 0,00021 | NM_001098402    | ZBTB34     |
| 8157941 | 2,61 | 6,11 | 0,00581 | 2,02  | 4,06  | 0,00050 | NM_001099270    | CALM1      |
| 7976200 | 2,61 | 6,11 | 0,00955 | 3,24  | 9,48  | 0,00084 | NM_006888       | CKAP5      |
| 7947694 | 2,61 | 6,11 | 0,00337 | 3,09  | 8,51  | 0,00025 | NM_001008938    | PIGN       |
| 8023605 | 2,61 | 6,11 | 0,02136 | 2,43  | 5,39  | 0,00161 | NM_176787       | FAM134C    |
| 8015655 | 2,61 | 6,11 | 0,00684 | 3,42  | 10,74 | 0,00581 | NM_178126       | SLC9A6     |
| 8170097 | 2,61 | 6,10 | 0,00598 | 3,57  | 11,88 | 0,00023 | NM_001042537    | SMG1       |
| 7999841 | 2,61 | 6,10 | 0,00332 | 3,47  | 11,08 | 0,00296 | NM_015092       | MPP1       |
| 8176174 | 2,61 | 6,10 | 0,01072 | 3,15  | 8,88  | 0,00007 | NM_002436       | MED31      |
| 8011968 | 2,61 | 6,09 | 0,03171 | 3,59  | 12,03 | 0,00068 | NM_016060       | EDEM3      |
| 7922823 | 2,61 | 6,09 | 0,00453 | 3,53  | 11,59 | 0,00005 | NM_025191       | BZW2       |
| 8131583 | 2,61 | 6,09 | 0,00405 | 3,33  | 10,04 | 0,00009 | NM_001159767    | COLEC10    |
| 8148029 | 2,61 | 6,09 | 0,00112 | -1,65 | -3,14 | 0,00043 | NM_006438       | CASP3      |
| 8103922 | 2,61 | 6,09 | 0,00047 | 1,57  | 2,97  | 0,00015 | NM_004346       | DDX6       |
| 7952103 | 2,60 | 6,08 | 0,00733 | 2,33  | 5,04  | 0,00795 | NM_004397       | ACTN4      |
| 8028524 | 2,60 | 6,08 | 0,06366 | 3,80  | 13,91 | 0,00236 | NM_004924       | FAM120A    |
| 8162462 | 2,60 | 6,08 | 0,01930 | 3,16  | 8,91  | 0,00685 | NM_014612       | ECE1       |
| 7913357 | 2,60 | 6,07 | 0,00393 | 3,95  | 15,45 | 0,00269 | NM_001397       | FLOT1      |
| 8124828 | 2,60 | 6,07 | 0,00564 | 3,15  | 8,89  | 0,00081 | NM_005803       | FLOT1      |
| 8178419 | 2,60 | 6,07 | 0,00564 | 3,15  | 8,89  | 0,00081 | NM_005803       | FLOT1      |
| 8179688 | 2,60 | 6,07 | 0,00564 | 3,15  | 8,89  | 0,00081 | NM_005803       | SCHIP1     |
| 8083677 | 2,60 | 6,07 | 0,01034 | 1,81  | 3,51  | 0,02206 | NM_014575       | H3F3A      |
| 8046515 | 2,60 | 6,07 | 0,01888 | 2,30  | 4,94  | 0,00024 | NM_002107       | C20orf11   |
| 8064007 | 2,60 | 6,06 | 0,00979 | 2,91  | 7,49  | 0,00041 | NM_017896       | ST3GAL5    |
| 8053484 | 2,60 | 6,06 | 0,01030 | 0,83  | 1,78  | 0,05697 | NM_003896       | SAPS3      |
| 7942032 | 2,60 | 6,06 | 0,01004 | 2,98  | 7,90  | 0,01128 | NM_001164162    | ZYX        |
| 8136918 | 2,60 | 6,06 | 0,01921 | 3,64  | 12,47 | 0,00002 | NM_003461       | ADAR       |
| 7920531 | 2,60 | 6,06 | 0,00057 | 3,15  | 8,85  | 0,00157 | NM_001111       | NUP205     |
| 8136401 | 2,60 | 6,06 | 0,00764 | 2,93  | 7,64  | 0,00121 | NM_015135       | RGS4       |
| 7906919 | 2,60 | 6,06 | 0,00100 | -1,74 | -3,35 | 0,00009 | NM_001102445    | PCOLCE     |
| 8134869 | 2,60 | 6,05 | 0,00114 | -0,19 | -1,14 | 0,26473 | NM_002593       | PPP2R3C    |
| 7978628 | 2,60 | 6,05 | 0,01259 | 3,14  | 8,83  | 0,00082 | NM_017917       | EPC2       |
| 8045619 | 2,60 | 6,05 | 0,00187 | 2,25  | 4,76  | 0,00384 | NM_015630       | TRA2B      |
| 8092564 | 2,60 | 6,05 | 0,00973 | 2,51  | 5,70  | 0,00106 | NM_004593       | GIGYF2     |
| 8049199 | 2,60 | 6,05 | 0,00949 | 2,65  | 6,30  | 0,00342 | NM_001103147    | RPSA       |
| 8078905 | 2,60 | 6,05 | 0,03309 | 2,13  | 4,39  | 0,00020 | NM_002295       | MRPS27     |
| 8112570 | 2,60 | 6,04 | 0,00833 | 2,92  | 7,55  | 0,00201 | NM_015084       | CTPS2      |
| 8171493 | 2,59 | 6,04 | 0,00437 | 2,24  | 4,71  | 0,00164 | NM_175859       | PRKAA1     |
| 8111796 | 2,59 | 6,04 | 0,01737 | 2,70  | 6,51  | 0,00587 | NM_206907       | NDRG1      |
| 8153002 | 2,59 | 6,04 | 0,00208 | 2,79  | 6,90  | 0,00201 | NM_001135242    | C15orf44   |
| 7989834 | 2,59 | 6,04 | 0,01814 | 4,12  | 17,34 | 0,00001 | AK296134 C9orf5 |            |
| 8163086 | 2,59 | 6,03 | 0,01987 | 4,24  | 18,87 | 0,00022 | NM_032012       | MLEC       |
| 7959205 | 2,59 | 6,03 | 0,00146 | 3,15  | 8,90  | 0,00004 | NM_014730       | RPS27A     |
| 8001782 | 2,59 | 6,03 | 0,00099 | 1,71  | 3,27  | 0,01501 | NM_002954       | PPP3CB     |
| 7934393 | 2,59 | 6,03 | 0,02608 | 2,90  | 7,47  | 0,00045 | NM_001142353    | GSK3B      |
| 8089801 | 2,59 | 6,03 | 0,02420 | 3,78  | 13,75 | 0,00000 | NM_002093       | HMGGN1     |
| 8176191 | 2,59 | 6,03 | 0,10825 | 2,03  | 4,07  | 0,00416 | NM_004965       | PON2       |
| 8141076 | 2,59 | 6,03 | 0,01042 | 3,96  | 15,54 | 0,00022 | NM_000305       | SPTBN1     |
| 8041995 | 2,59 | 6,03 | 0,00771 | 2,52  | 5,74  | 0,00224 | NM_003128       | CD200      |
| 8081657 | 2,59 | 6,03 | 0,04016 | -0,89 | -1,85 | 0,00022 | NM_001004196    | HIATL1     |
| 8156538 | 2,59 | 6,02 | 0,01607 | 4,27  | 19,27 | 0,00039 | NM_032558       | CDC42BPA   |
| 7924773 | 2,59 | 6,02 | 0,00541 | 2,75  | 6,71  | 0,00799 | NM_003607       | TMEM87B    |
| 8044417 | 2,59 | 6,02 | 0,02238 | 2,35  | 5,09  | 0,00177 | NM_032824       | YKT6       |
| 8132580 | 2,59 | 6,02 | 0,00158 | 3,43  | 10,81 | 0,00374 | NM_006555       | RPL41      |
| 7957530 | 2,59 | 6,02 | 0,21461 | -1,34 | -2,53 | 0,00124 | NM_021104       | TGM2       |
| 8066214 | 2,59 | 6,01 | 0,00375 | 3,51  | 11,39 | 0,00031 | NM_004613       | SNORD116-1 |
| 7981949 | 2,59 | 6,01 | 0,01178 | -2,00 | -4,00 | 0,01432 | NR_003316       | TOMM20     |
| 7925174 | 2,59 | 6,01 | 0,04376 | 3,13  | 8,77  | 0,00468 | NM_014765       | TYW3       |
| 7902345 | 2,59 | 6,00 | 0,00083 | 1,76  | 3,40  | 0,00019 | NM_138467       | HGSNAT     |
| 8146285 | 2,59 | 6,00 | 0,00028 | 3,29  | 9,75  | 0,00004 | NM_152419       | PLAU       |
| 7928429 | 2,58 | 5,99 | 0,07589 | 4,78  | 27,57 | 0,00016 | NM_002658       | PLEKHA2    |
| 8145977 | 2,58 | 5,98 | 0,00170 | 0,78  | 1,72  | 0,09413 | NM_021623       | PLEKHM3    |
| 8058512 | 2,58 | 5,98 | 0,00250 | 3,22  | 9,29  | 0,00002 | NM_001080475    | SENPS5     |
| 8084971 | 2,58 | 5,98 | 0,00730 | 3,94  | 15,36 | 0,00003 | NM_152699       | HTRA1      |
| 7931097 | 2,58 | 5,97 | 0,00211 | 1,12  | 2,18  | 0,00323 | NM_002775       | PLTP       |
| 8066619 | 2,58 | 5,97 | 0,00189 | -1,03 | -2,04 | 0,00207 | NM_006227       | PEPD       |
| 8036010 | 2,58 | 5,97 | 0,02433 | 3,42  | 10,72 | 0,00005 | NM_000285       | ACAT1      |

|         |      |      |         |       |       |         |                |           |
|---------|------|------|---------|-------|-------|---------|----------------|-----------|
| 7943605 | 2,58 | 5,97 | 0,01916 | 3,01  | 8,07  | 0,00251 | NM_000019      | PTCD3     |
| 8043251 | 2,58 | 5,96 | 0,01403 | 3,19  | 9,13  | 0,00002 | NM_017952      | AAK1      |
| 8052798 | 2,58 | 5,96 | 0,00899 | 1,92  | 3,77  | 0,00061 | NM_014911      | GM2A      |
| 8109344 | 2,58 | 5,96 | 0,00760 | 2,58  | 5,99  | 0,00066 | NM_000405      | NUDT4P1   |
| 7919193 | 2,58 | 5,96 | 0,00427 | 3,48  | 11,13 | 0,00414 | NR_002212      | C20orf177 |
| 8063755 | 2,58 | 5,96 | 0,00419 | 2,41  | 5,30  | 0,00461 | BC054002 SNX30 |           |
| 8157253 | 2,58 | 5,96 | 0,00695 | 3,21  | 9,26  | 0,00022 | NM_001012994   | COX5A     |
| 7990436 | 2,58 | 5,96 | 0,00329 | 3,72  | 13,15 | 0,00172 | NM_004255      | C18orf32  |
| 8023246 | 2,57 | 5,96 | 0,00026 | 0,67  | 1,59  | 0,30630 | BC093004 PELO  |           |
| 8105229 | 2,57 | 5,95 | 0,00815 | 1,08  | 2,11  | 0,01532 | NM_015946      | ---       |
| 7904967 | 2,57 | 5,95 | 0,00109 | -0,76 | -1,70 | 0,12622 | --- CSF1       |           |
| 7903786 | 2,57 | 5,95 | 0,00427 | 1,72  | 3,29  | 0,00400 | NM_000757      | OBFC2B    |
| 7956220 | 2,57 | 5,95 | 0,00170 | 2,66  | 6,31  | 0,00096 | NM_024068      | TBC1D2B   |
| 7990657 | 2,57 | 5,94 | 0,01379 | 2,96  | 7,77  | 0,00055 | NM_144572      | ID3       |
| 7913655 | 2,57 | 5,94 | 0,02707 | 2,38  | 5,21  | 0,00021 | NM_002167      | SCRN3     |
| 8046502 | 2,57 | 5,94 | 0,00093 | 2,29  | 4,89  | 0,00909 | NM_024583      | MED15     |
| 8071392 | 2,57 | 5,94 | 0,00877 | 4,30  | 19,72 | 0,00075 | NM_001003891   | CCBL2     |
| 7917482 | 2,57 | 5,94 | 0,00874 | 3,29  | 9,76  | 0,00113 | NM_001008661   | ADAM19    |
| 8115490 | 2,57 | 5,93 | 0,00623 | 0,71  | 1,64  | 0,13995 | NM_033274      | ANGPTL1   |
| 7922598 | 2,57 | 5,93 | 0,02632 | -0,97 | -1,96 | 0,02306 | NM_004673      | RPL3      |
| 8076209 | 2,57 | 5,92 | 0,04068 | 2,69  | 6,46  | 0,01286 | NM_000967      | C1orf144  |
| 7898328 | 2,57 | 5,92 | 0,01493 | 3,39  | 10,49 | 0,00069 | NM_001114600   | RPSA      |
| 7918050 | 2,57 | 5,92 | 0,02211 | 2,10  | 4,29  | 0,00027 | NM_002295      | AKR1A1    |
| 7901110 | 2,57 | 5,92 | 0,00523 | 3,99  | 15,85 | 0,00006 | NM_006066      | ITSN2     |
| 8050719 | 2,56 | 5,92 | 0,00149 | 2,84  | 7,18  | 0,01344 | NM_006277      | WDR36     |
| 8107282 | 2,56 | 5,92 | 0,00160 | 2,90  | 7,48  | 0,00199 | NM_139281      | EYA3      |
| 7914153 | 2,56 | 5,91 | 0,00040 | 1,74  | 3,35  | 0,00099 | NM_001990      | WDR43     |
| 8041149 | 2,56 | 5,91 | 0,02480 | 3,54  | 11,65 | 0,00044 | NM_015131      | ARHGAP18  |
| 8129458 | 2,56 | 5,91 | 0,01054 | 2,18  | 4,52  | 0,00057 | NM_033515      | BIRC6     |
| 8041283 | 2,56 | 5,91 | 0,00567 | 3,02  | 8,12  | 0,00680 | NM_016252      | SLMO2     |
| 8067295 | 2,56 | 5,91 | 0,00274 | 2,73  | 6,62  | 0,00016 | NM_016045      | MED28     |
| 8094271 | 2,56 | 5,90 | 0,11329 | 2,88  | 7,37  | 0,00000 | NM_025205      | NAGK      |
| 8042576 | 2,56 | 5,90 | 0,02095 | 3,55  | 11,73 | 0,00074 | NM_017567      | MMGT1     |
| 8175360 | 2,56 | 5,90 | 0,00283 | 3,06  | 8,34  | 0,00280 | NM_173470      | ZNF12     |
| 8138116 | 2,56 | 5,89 | 0,00059 | 1,88  | 3,68  | 0,00496 | NM_016265      | ZNF267    |
| 7995258 | 2,56 | 5,89 | 0,00347 | 2,07  | 4,20  | 0,03089 | NM_003414      | SIKE1     |
| 7918847 | 2,56 | 5,89 | 0,01099 | 2,66  | 6,31  | 0,00155 | NM_001102396   | MPP5      |
| 7975203 | 2,56 | 5,89 | 0,00163 | 2,96  | 7,80  | 0,00499 | NM_022474      | MRPS18B   |
| 8117955 | 2,56 | 5,89 | 0,00336 | 2,90  | 7,48  | 0,00855 | NM_014046      | MRPS18B   |
| 8177824 | 2,56 | 5,89 | 0,00336 | 2,90  | 7,48  | 0,00855 | NM_014046      | MRPS18B   |
| 8179139 | 2,56 | 5,89 | 0,00336 | 2,90  | 7,48  | 0,00855 | NM_014046      | FAM129A   |
| 7922846 | 2,56 | 5,89 | 0,00117 | 2,92  | 7,55  | 0,00029 | NM_052966      | SERP1     |
| 8091458 | 2,56 | 5,88 | 0,00736 | 3,09  | 8,52  | 0,00054 | NM_014445      | TMEM98    |
| 8006415 | 2,56 | 5,88 | 0,01992 | 2,69  | 6,46  | 0,00094 | NM_015544      | TERF1     |
| 8146914 | 2,56 | 5,88 | 0,02424 | 3,21  | 9,25  | 0,00619 | NM_017489      | CCDC117   |
| 8072153 | 2,55 | 5,88 | 0,00120 | 1,44  | 2,71  | 0,00384 | NM_173510      | ADAM23    |
| 8047788 | 2,55 | 5,87 | 0,00322 | 0,97  | 1,96  | 0,13391 | NM_003812      | ZHX1      |
| 8152656 | 2,55 | 5,87 | 0,00420 | 3,02  | 8,12  | 0,00286 | NM_001017926   | TOP1      |
| 8062603 | 2,55 | 5,87 | 0,00335 | 3,37  | 10,35 | 0,00081 | NM_003286      | RHEB      |
| 8143957 | 2,55 | 5,87 | 0,02373 | 2,69  | 6,45  | 0,00101 | NM_005614      | SMPD4     |
| 8055183 | 2,55 | 5,86 | 0,03426 | 4,05  | 16,55 | 0,00193 | NM_017751      | TAF13     |
| 7918284 | 2,55 | 5,86 | 0,00588 | 1,57  | 2,97  | 0,05705 | NM_005645      | RPS8      |
| 7901038 | 2,55 | 5,86 | 0,03355 | 2,39  | 5,23  | 0,00025 | NM_001012      | NME1      |
| 8008517 | 2,55 | 5,86 | 0,00511 | 4,06  | 16,64 | 0,00011 | NM_198175      | UBR4      |
| 7913001 | 2,55 | 5,86 | 0,00219 | 3,05  | 8,25  | 0,01236 | NM_020765      | UBP1      |
| 8086057 | 2,55 | 5,86 | 0,01939 | 2,51  | 5,71  | 0,00025 | NM_014517      | IPO11     |
| 8105545 | 2,55 | 5,86 | 0,00796 | 3,16  | 8,94  | 0,00396 | NM_016338      | DYNC2H1   |
| 7943442 | 2,55 | 5,86 | 0,01486 | 1,29  | 2,45  | 0,03943 | NM_001377      | MORC4     |
| 8174313 | 2,55 | 5,85 | 0,00504 | 1,48  | 2,78  | 0,02159 | NM_024657      | CD47      |
| 8089299 | 2,55 | 5,85 | 0,02701 | 3,74  | 13,33 | 0,00276 | NM_001777      | ---       |
| 8106475 | 2,55 | 5,85 | 0,00668 | 1,13  | 2,19  | 0,02857 | --- SGPL1      |           |
| 7928171 | 2,55 | 5,85 | 0,00728 | 4,27  | 19,32 | 0,00002 | NM_003901      | HBXIP     |
| 7918437 | 2,55 | 5,85 | 0,00736 | 4,31  | 19,80 | 0,00004 | NM_006402      | SRPR      |
| 7952557 | 2,55 | 5,85 | 0,00685 | 3,03  | 8,15  | 0,00091 | NM_003139      | PSME1     |
| 7973564 | 2,55 | 5,84 | 0,00285 | 2,61  | 6,09  | 0,00004 | NM_176783      | CPT2      |
| 7916262 | 2,55 | 5,84 | 0,00375 | 4,56  | 23,57 | 0,00009 | NM_000098      | LEPR      |
| 7902074 | 2,55 | 5,84 | 0,01250 | 2,04  | 4,12  | 0,01035 | NM_002303      | MT1A      |
| 7995806 | 2,55 | 5,84 | 0,03765 | 3,29  | 9,81  | 0,00123 | NM_005946      | LDHB      |
| 7961693 | 2,55 | 5,84 | 0,01034 | 4,46  | 21,98 | 0,00220 | NM_002300      | ARL8A     |
| 7923394 | 2,55 | 5,84 | 0,00636 | 3,32  | 9,98  | 0,00001 | NM_138795      | PQLC3     |
| 8040278 | 2,54 | 5,83 | 0,00039 | 3,85  | 14,42 | 0,00004 | NM_152391      | MPP6      |
| 8131927 | 2,54 | 5,83 | 0,00943 | 2,85  | 7,20  | 0,00315 | NM_016447      | TMEM85    |
| 7982507 | 2,54 | 5,83 | 0,05825 | 4,06  | 16,71 | 0,00021 | NM_016454      | KLHDC2    |

|         |      |      |         |       |       |         |              |          |
|---------|------|------|---------|-------|-------|---------|--------------|----------|
| 7974229 | 2,54 | 5,83 | 0,02404 | 5,04  | 32,84 | 0,00037 | NM_014315    | ADAMT55  |
| 8069689 | 2,54 | 5,82 | 0,00502 | -1,10 | -2,15 | 0,00022 | NM_007038    | GUSBP1   |
| 8104621 | 2,54 | 5,82 | 0,05430 | 1,69  | 3,22  | 0,05724 | NR_027028    | CTSD     |
| 7945666 | 2,54 | 5,81 | 0,00533 | 2,43  | 5,38  | 0,00378 | NM_001909    | ARHGAP5  |
| 7973840 | 2,54 | 5,81 | 0,00231 | 1,49  | 2,81  | 0,06977 | NM_001030055 | CENPN    |
| 7997381 | 2,54 | 5,81 | 0,00916 | 3,44  | 10,85 | 0,00043 | NM_001100624 | PFDN6    |
| 8118661 | 2,54 | 5,81 | 0,00889 | 4,08  | 16,90 | 0,00267 | NM_014260    | PFDN6    |
| 8178270 | 2,54 | 5,81 | 0,00889 | 4,08  | 16,90 | 0,00267 | NM_014260    | PFDN6    |
| 8179559 | 2,54 | 5,81 | 0,00889 | 4,08  | 16,90 | 0,00267 | NM_014260    | C8orf40  |
| 8146225 | 2,54 | 5,81 | 0,00644 | 3,54  | 11,67 | 0,00014 | NM_001135674 | CNPY3    |
| 8119609 | 2,54 | 5,80 | 0,00173 | 2,13  | 4,37  | 0,08418 | NM_006586    | EXOC1    |
| 8095163 | 2,54 | 5,80 | 0,00351 | 1,78  | 3,43  | 0,00257 | NM_001024924 | ---      |
| 7915594 | 2,54 | 5,80 | 0,01237 | 1,73  | 3,32  | 0,00644 | ---          | DNAJC18  |
| 8114526 | 2,54 | 5,80 | 0,00369 | 2,40  | 5,27  | 0,00224 | NM_152686    | GAPVD1   |
| 8157858 | 2,54 | 5,80 | 0,01379 | 3,63  | 12,35 | 0,00026 | NM_015635    | KBTBD2   |
| 8138922 | 2,54 | 5,80 | 0,00480 | 3,11  | 8,61  | 0,00004 | NM_015483    | OAZ1     |
| 8024436 | 2,54 | 5,80 | 0,01219 | 4,84  | 28,66 | 0,00447 | NM_004152    | C5orf23  |
| 8104758 | 2,53 | 5,80 | 0,08478 | 0,63  | 1,55  | 0,37858 | BC022250     | ---      |
| 8106761 | 2,53 | 5,79 | 0,02050 | -0,08 | -1,06 | 0,88263 | ---          | OSBPL9   |
| 7901385 | 2,53 | 5,79 | 0,03818 | 3,11  | 8,65  | 0,00052 | NM_024586    | CACHD1   |
| 7901993 | 2,53 | 5,79 | 0,00687 | 2,33  | 5,02  | 0,00065 | NM_020925    | ATG2B    |
| 7981217 | 2,53 | 5,79 | 0,00282 | 3,32  | 9,98  | 0,00959 | NM_018036    | C11orf54 |
| 7943162 | 2,53 | 5,78 | 0,00137 | 4,04  | 16,48 | 0,00030 | NM_014039    | PPP2R2A  |
| 8145440 | 2,53 | 5,78 | 0,01620 | 1,71  | 3,28  | 0,02264 | NM_002717    | COX6C    |
| 8151993 | 2,53 | 5,78 | 0,00429 | 1,69  | 3,22  | 0,02856 | NM_004374    | ZC3H14   |
| 7976101 | 2,53 | 5,78 | 0,00077 | 2,00  | 3,99  | 0,00252 | NM_024824    | TAX1BP1  |
| 8131975 | 2,53 | 5,78 | 0,00105 | 1,64  | 3,12  | 0,01774 | NM_006024    | PFDN1    |
| 8114567 | 2,53 | 5,77 | 0,09185 | 3,93  | 15,28 | 0,00035 | NM_002622    | KIAA0922 |
| 8097867 | 2,53 | 5,77 | 0,00242 | 2,20  | 4,58  | 0,00279 | NM_001131007 | BRD7     |
| 8001350 | 2,53 | 5,77 | 0,00287 | 2,14  | 4,42  | 0,00219 | NM_001173984 | DHRS7B   |
| 8005699 | 2,53 | 5,77 | 0,00025 | 2,64  | 6,25  | 0,00459 | NM_015510    | RPL36A   |
| 8138361 | 2,53 | 5,76 | 0,08338 | 2,59  | 6,03  | 0,00836 | NM_021029    | FBL      |
| 8036777 | 2,53 | 5,76 | 0,00537 | 3,68  | 12,81 | 0,00026 | NM_001436    | YAP1     |
| 7943398 | 2,53 | 5,76 | 0,01447 | 1,03  | 2,04  | 0,00579 | NM_001130145 | TRPS1    |
| 8152453 | 2,53 | 5,76 | 0,00790 | -0,64 | -1,56 | 0,01135 | NM_014112    | PRKAA2   |
| 7901720 | 2,52 | 5,76 | 0,01714 | 3,47  | 11,09 | 0,00099 | NM_006252    | FAM82B   |
| 8151644 | 2,52 | 5,75 | 0,02402 | 2,71  | 6,55  | 0,00035 | NM_016033    | NUPL1    |
| 7968132 | 2,52 | 5,75 | 0,00310 | 3,61  | 12,19 | 0,00011 | NM_014089    | EIF2B3   |
| 7915640 | 2,52 | 5,75 | 0,02374 | 2,92  | 7,55  | 0,00210 | NM_020365    | RNF111   |
| 7983953 | 2,52 | 5,75 | 0,02252 | 2,86  | 7,27  | 0,00866 | NM_017610    | SPRED2   |
| 8052689 | 2,52 | 5,74 | 0,00626 | 2,98  | 7,91  | 0,00233 | NM_181784    | PYROXD1  |
| 7954382 | 2,52 | 5,74 | 0,03547 | 0,77  | 1,71  | 0,24139 | NM_024854    | NEXN     |
| 7902495 | 2,52 | 5,74 | 0,00140 | 0,04  | 1,03  | 0,80997 | NM_144573    | ZNF195   |
| 7945864 | 2,52 | 5,74 | 0,01872 | 3,95  | 15,50 | 0,00003 | NM_001130520 | PNPLA8   |
| 8142307 | 2,52 | 5,73 | 0,02703 | 3,11  | 8,61  | 0,00022 | NM_015723    | EIF2AK2  |
| 8051501 | 2,52 | 5,73 | 0,02241 | 3,25  | 9,50  | 0,00074 | NM_002759    | GPI      |
| 8027621 | 2,52 | 5,72 | 0,04106 | 3,58  | 11,94 | 0,00030 | NM_000175    | NFIB     |
| 8160138 | 2,51 | 5,72 | 0,09441 | 0,25  | 1,19  | 0,52302 | NM_005596    | HELZ     |
| 8017776 | 2,51 | 5,71 | 0,01565 | 2,72  | 6,61  | 0,00000 | NM_014877    | ARL2     |
| 7941104 | 2,51 | 5,71 | 0,01007 | 2,75  | 6,71  | 0,01462 | NM_001667    | COG6     |
| 7968711 | 2,51 | 5,71 | 0,01367 | 2,13  | 4,37  | 0,00038 | NM_020751    | GCSH     |
| 8002999 | 2,51 | 5,71 | 0,01225 | 2,85  | 7,21  | 0,00498 | NM_004483    | C11orf59 |
| 7950119 | 2,51 | 5,71 | 0,04163 | 3,43  | 10,75 | 0,00000 | NM_017907    | NHP2     |
| 7929243 | 2,51 | 5,70 | 0,00042 | 1,98  | 3,94  | 0,00706 | NM_017838    | PPP1CA   |
| 7949765 | 2,51 | 5,70 | 0,00241 | 4,40  | 21,09 | 0,00253 | NM_001008709 | MAGT1    |
| 8173713 | 2,51 | 5,70 | 0,00197 | 2,77  | 6,84  | 0,00120 | NM_032121    | DEDD     |
| 7921793 | 2,51 | 5,70 | 0,01096 | 4,52  | 22,91 | 0,00003 | NM_032998    | PDE6D    |
| 8059731 | 2,51 | 5,70 | 0,04041 | 4,43  | 21,54 | 0,00010 | NM_002601    | STYXL1   |
| 8140386 | 2,51 | 5,69 | 0,00492 | 2,35  | 5,10  | 0,00378 | NM_016086    | SMG1     |
| 8000638 | 2,51 | 5,69 | 0,00733 | 3,06  | 8,35  | 0,01459 | NM_015092    | MEF2A    |
| 7986411 | 2,51 | 5,68 | 0,00580 | 1,43  | 2,70  | 0,02046 | NM_005587    | LNPEP    |
| 8107066 | 2,50 | 5,67 | 0,00509 | 2,33  | 5,04  | 0,02098 | NM_005575    | PUS7L    |
| 7962427 | 2,50 | 5,66 | 0,01262 | 1,52  | 2,86  | 0,01972 | NM_031292    | S100A16  |
| 7920291 | 2,50 | 5,66 | 0,00156 | 4,12  | 17,38 | 0,00003 | NM_080388    | ARL1     |
| 7965789 | 2,50 | 5,66 | 0,03564 | 2,24  | 4,73  | 0,00827 | NM_001177    | NID1     |
| 7925320 | 2,50 | 5,66 | 0,01284 | 1,90  | 3,73  | 0,00352 | NM_002508    | SON      |
| 8068289 | 2,50 | 5,66 | 0,00057 | 2,85  | 7,19  | 0,01758 | NM_138927    | RABL2B   |
| 8077171 | 2,50 | 5,65 | 0,01082 | 2,84  | 7,14  | 0,00094 | NM_001130921 | FAM32A   |
| 8026541 | 2,50 | 5,65 | 0,03056 | 2,13  | 4,37  | 0,02671 | AF151902     | RICTOR   |
| 8111698 | 2,50 | 5,65 | 0,02743 | 3,30  | 9,85  | 0,01149 | NM_152756    | SGK269   |
| 7990632 | 2,50 | 5,65 | 0,05428 | 2,92  | 7,58  | 0,01420 | NM_024776    | ATMIN    |
| 7997396 | 2,50 | 5,65 | 0,00125 | 2,23  | 4,69  | 0,05672 | NM_015251    | MFAP5    |
| 7960919 | 2,50 | 5,65 | 0,02607 | -0,15 | -1,11 | 0,78216 | NM_003480    | MYSM1    |

|         |      |      |         |       |       |         |              |           |
|---------|------|------|---------|-------|-------|---------|--------------|-----------|
| 7916592 | 2,50 | 5,64 | 0,00495 | 2,60  | 6,05  | 0,00269 | NM_001085487 | TXNL4A    |
| 8023920 | 2,50 | 5,64 | 0,03103 | 2,48  | 5,57  | 0,02244 | NM_006701    | MFAP1     |
| 7988245 | 2,50 | 5,64 | 0,00058 | 1,81  | 3,51  | 0,00789 | NM_005926    | ADD1      |
| 8093643 | 2,49 | 5,64 | 0,00012 | 2,07  | 4,21  | 0,00060 | NM_176801    | BCAP31    |
| 8175835 | 2,49 | 5,63 | 0,02433 | 2,42  | 5,35  | 0,00080 | NM_001139457 | SMAP2     |
| 7900426 | 2,49 | 5,63 | 0,02394 | 1,50  | 2,84  | 0,02567 | NM_022733    | USP28     |
| 7951752 | 2,49 | 5,62 | 0,00699 | 2,95  | 7,73  | 0,00000 | NM_020886    | UBE2D1    |
| 7927658 | 2,49 | 5,62 | 0,00270 | 2,72  | 6,57  | 0,00105 | NM_003338    | ZMAT3     |
| 8092230 | 2,49 | 5,62 | 0,03369 | 2,24  | 4,73  | 0,00020 | NM_022470    | DPP8      |
| 7989806 | 2,49 | 5,62 | 0,00142 | 3,64  | 12,47 | 0,00044 | NM_197960    | ELOVL4    |
| 8127767 | 2,49 | 5,62 | 0,00063 | 1,58  | 2,99  | 0,01511 | NM_022726    | ADK       |
| 7928471 | 2,49 | 5,62 | 0,00489 | 3,58  | 11,98 | 0,00037 | NM_006721    | AHNAK     |
| 7948667 | 2,49 | 5,62 | 0,00302 | 1,02  | 2,03  | 0,11603 | NM_001620    | HIVEP2    |
| 8129953 | 2,49 | 5,61 | 0,00845 | 2,99  | 7,95  | 0,01277 | NM_006734    | ---       |
| 8060738 | 2,49 | 5,61 | 0,01087 | 1,12  | 2,18  | 0,09322 | ---          | RHOBTB1   |
| 7933821 | 2,49 | 5,61 | 0,04488 | 1,67  | 3,17  | 0,00334 | NR_024556    | SLC9A8    |
| 8063351 | 2,49 | 5,61 | 0,00770 | 2,35  | 5,11  | 0,00155 | NM_015266    | MT1DP     |
| 7995813 | 2,49 | 5,61 | 0,00782 | 2,03  | 4,09  | 0,00427 | NR_027781    | RBPJ      |
| 8094460 | 2,49 | 5,61 | 0,00541 | 3,48  | 11,13 | 0,00216 | NM_005349    | ALAS1     |
| 8080184 | 2,49 | 5,61 | 0,00627 | 3,35  | 10,18 | 0,00053 | NM_000688    | NUB1      |
| 8137414 | 2,49 | 5,60 | 0,00127 | 2,51  | 5,69  | 0,00023 | NM_016118    | VPS29     |
| 7966332 | 2,49 | 5,60 | 0,00895 | 2,02  | 4,06  | 0,00902 | NM_016226    | MYH9      |
| 8075728 | 2,49 | 5,60 | 0,00556 | 3,19  | 9,12  | 0,00167 | NM_002473    | FKBP7     |
| 8057045 | 2,49 | 5,60 | 0,00123 | -0,25 | -1,19 | 0,15966 | NM_181342    | SH3D19    |
| 8103166 | 2,48 | 5,60 | 0,02911 | 1,70  | 3,24  | 0,05184 | NM_001009555 | LOC728613 |
| 8110858 | 2,48 | 5,59 | 0,00230 | 2,12  | 4,35  | 0,01683 | NR_003713    | RTN4      |
| 8052204 | 2,48 | 5,59 | 0,00474 | 1,16  | 2,23  | 0,04622 | NM_020532    | PRKRA     |
| 8057034 | 2,48 | 5,59 | 0,00099 | 1,92  | 3,79  | 0,02352 | NM_003690    | MRPL46    |
| 7991209 | 2,48 | 5,59 | 0,03174 | 3,25  | 9,50  | 0,00166 | NM_022163    | ARFGEF2   |
| 8063242 | 2,48 | 5,59 | 0,00591 | 3,88  | 14,75 | 0,00011 | NM_006420    | GOPC      |
| 8129181 | 2,48 | 5,58 | 0,00594 | 2,41  | 5,31  | 0,00315 | NM_020399    | PIGT      |
| 8062981 | 2,48 | 5,58 | 0,01040 | 1,81  | 3,52  | 0,00479 | NM_015937    | ---       |
| 8151540 | 2,48 | 5,58 | 0,08632 | 2,79  | 6,93  | 0,00417 | ---          | FAM91A1   |
| 8148208 | 2,48 | 5,58 | 0,02242 | 4,63  | 24,83 | 0,00039 | NM_144963    | C10orf116 |
| 7928882 | 2,48 | 5,57 | 0,00350 | -1,06 | -2,08 | 0,19218 | NM_006829    | TTC3      |
| 8068522 | 2,48 | 5,57 | 0,02575 | 3,52  | 11,50 | 0,00079 | NM_003316    | ZDHHC7    |
| 8003180 | 2,48 | 5,57 | 0,00575 | 3,53  | 11,52 | 0,00041 | NM_001145548 | MRS2      |
| 8117194 | 2,48 | 5,57 | 0,00804 | 3,51  | 11,37 | 0,00078 | NM_020662    | RRAS      |
| 8038407 | 2,48 | 5,56 | 0,00812 | 3,19  | 9,10  | 0,00329 | NM_006270    | CROT      |
| 8133938 | 2,48 | 5,56 | 0,07603 | 1,14  | 2,21  | 0,02898 | NM_001143935 | SETD2     |
| 8086706 | 2,47 | 5,56 | 0,00898 | 3,81  | 14,02 | 0,00091 | NM_014159    | ELOVL2    |
| 8123920 | 2,47 | 5,56 | 0,00355 | 1,79  | 3,47  | 0,00035 | NM_017770    | TTC23     |
| 7991485 | 2,47 | 5,56 | 0,00072 | 1,37  | 2,59  | 0,01220 | NM_001040655 | CNTN4     |
| 8077323 | 2,47 | 5,55 | 0,02667 | -1,48 | -2,79 | 0,00292 | NM_175607    | VOPP1     |
| 7904969 | 2,47 | 5,55 | 0,00331 | 1,43  | 2,69  | 0,00040 | NM_030796    | PLA2G4A   |
| 7908351 | 2,47 | 5,55 | 0,00037 | 2,08  | 4,23  | 0,00867 | NM_024420    | SNORA8    |
| 7951034 | 2,47 | 5,55 | 0,00665 | 2,92  | 7,57  | 0,03865 | NR_002920    | SFRS3     |
| 8119080 | 2,47 | 5,55 | 0,02892 | 3,74  | 13,32 | 0,00067 | NM_003017    | KLHL20    |
| 7907445 | 2,47 | 5,54 | 0,03310 | 1,96  | 3,90  | 0,00014 | NM_014458    | ZNF100    |
| 8035808 | 2,47 | 5,54 | 0,00821 | 3,25  | 9,54  | 0,00162 | NM_173531    | IFRD1     |
| 8135514 | 2,47 | 5,54 | 0,00074 | 2,63  | 6,21  | 0,00588 | NM_001550    | CTDSP2    |
| 7964579 | 2,47 | 5,54 | 0,01209 | 2,49  | 5,62  | 0,02001 | NM_005730    | IGF2R     |
| 8123181 | 2,47 | 5,53 | 0,00411 | 2,43  | 5,37  | 0,00186 | NM_000876    | GOT2      |
| 8001764 | 2,47 | 5,53 | 0,00640 | 3,75  | 13,43 | 0,00029 | NM_002080    | SMG1      |
| 8000156 | 2,47 | 5,53 | 0,00596 | 3,18  | 9,04  | 0,00674 | NM_015092    | WDR82     |
| 8087874 | 2,47 | 5,53 | 0,02678 | 3,22  | 9,33  | 0,00311 | NM_025222    | AHI1      |
| 8129728 | 2,47 | 5,53 | 0,00490 | 1,82  | 3,54  | 0,00644 | NM_001134831 | GTF2I     |
| 8133504 | 2,47 | 5,53 | 0,04260 | 3,51  | 11,40 | 0,01355 | NM_032999    | CCT4      |
| 8052562 | 2,47 | 5,53 | 0,00464 | 3,75  | 13,50 | 0,00055 | NM_006430    | IGF1R     |
| 7986383 | 2,47 | 5,53 | 0,00942 | 3,57  | 11,91 | 0,00029 | NM_000875    | ATP6AP1   |
| 8170882 | 2,47 | 5,53 | 0,00174 | 3,15  | 8,85  | 0,00625 | NM_001183    | SCP2      |
| 7901513 | 2,46 | 5,52 | 0,03888 | 2,72  | 6,59  | 0,00043 | NM_002979    | EIF2C1    |
| 7900030 | 2,46 | 5,52 | 0,00587 | 2,64  | 6,25  | 0,00806 | NM_012199    | FLRT3     |
| 8065071 | 2,46 | 5,52 | 0,00959 | 1,71  | 3,27  | 0,01154 | NM_198391    | RBM27     |
| 8108927 | 2,46 | 5,52 | 0,00055 | 3,42  | 10,71 | 0,00041 | NM_018989    | NAA15     |
| 8097480 | 2,46 | 5,52 | 0,01795 | 2,27  | 4,83  | 0,00393 | NM_057175    | TXN2      |
| 8075778 | 2,46 | 5,51 | 0,02279 | 2,20  | 4,59  | 0,00797 | NM_012473    | AGPAT6    |
| 8146142 | 2,46 | 5,51 | 0,01704 | 3,28  | 9,71  | 0,00039 | NM_178819    | TSC1      |
| 8164781 | 2,46 | 5,51 | 0,00365 | 2,61  | 6,11  | 0,01911 | NM_000368    | ISCU      |
| 7958414 | 2,46 | 5,51 | 0,00636 | 2,83  | 7,11  | 0,00001 | NM_014301    | FBXO8     |
| 8103755 | 2,46 | 5,51 | 0,02462 | 1,45  | 2,73  | 0,00763 | NM_012180    | HLA-J     |
| 8117813 | 2,46 | 5,51 | 0,00730 | 3,61  | 12,21 | 0,00012 | NR_024240    | COG1      |
| 8009533 | 2,46 | 5,51 | 0,00053 | 1,81  | 3,51  | 0,00002 | NM_018714    | GBP3      |



|         |      |      |         |       |       |         |                 |           |
|---------|------|------|---------|-------|-------|---------|-----------------|-----------|
| 7917503 | 2,46 | 5,50 | 0,00645 | -0,74 | -1,67 | 0,00636 | NM_018284       | ZFP62     |
| 8116494 | 2,46 | 5,50 | 0,01337 | 2,53  | 5,77  | 0,00021 | NM_152283       | DUSP18    |
| 8075423 | 2,46 | 5,50 | 0,00582 | 2,63  | 6,19  | 0,00192 | NM_152511       | DYNC2L11  |
| 8041676 | 2,46 | 5,50 | 0,00084 | 1,51  | 2,85  | 0,03183 | NM_016008       | HNRNPD    |
| 8101324 | 2,46 | 5,50 | 0,01078 | 3,59  | 12,02 | 0,00041 | NM_031370       | LOC554202 |
| 8160431 | 2,46 | 5,50 | 0,01557 | 1,87  | 3,65  | 0,00824 | NR_027054       | RNASEK    |
| 8012000 | 2,46 | 5,50 | 0,00002 | 1,46  | 2,74  | 0,02291 | NM_001004333    | DCAF17    |
| 8046318 | 2,46 | 5,49 | 0,01896 | 4,03  | 16,39 | 0,00133 | NR_028482       | RPP21     |
| 8177782 | 2,46 | 5,49 | 0,11188 | 4,68  | 25,63 | 0,00002 | NM_024839       | RPP21     |
| 8179097 | 2,46 | 5,49 | 0,11188 | 4,68  | 25,63 | 0,00002 | NM_024839       | NPC1      |
| 8022531 | 2,46 | 5,49 | 0,02775 | 3,50  | 11,32 | 0,01737 | NM_000271       | TXLNG     |
| 8166230 | 2,46 | 5,48 | 0,02232 | 3,94  | 15,37 | 0,00044 | NM_018360       | SCYL3     |
| 7922250 | 2,46 | 5,48 | 0,02842 | 3,12  | 8,68  | 0,00015 | NM_181093       | PLD1      |
| 8092134 | 2,45 | 5,48 | 0,00265 | 2,73  | 6,63  | 0,00623 | NM_002662       | FLII      |
| 8013191 | 2,45 | 5,48 | 0,00821 | 3,80  | 13,89 | 0,00066 | NM_002018       | NHLRC2    |
| 7930614 | 2,45 | 5,48 | 0,00166 | 3,37  | 10,32 | 0,00764 | NM_198514       | PDP1      |
| 8147344 | 2,45 | 5,48 | 0,06391 | 4,30  | 19,67 | 0,00429 | NM_001161778    | GNAI2     |
| 8079950 | 2,45 | 5,47 | 0,00827 | 2,70  | 6,48  | 0,00021 | NM_002070       | BOD1      |
| 8115865 | 2,45 | 5,47 | 0,00012 | 1,33  | 2,51  | 0,11395 | NM_138369       | PRKAR1A   |
| 8009457 | 2,45 | 5,46 | 0,00632 | 2,12  | 4,34  | 0,01125 | NM_212472       | SSBP2     |
| 8112940 | 2,45 | 5,45 | 0,00983 | -0,75 | -1,68 | 0,04464 | NM_012446       | DDX56     |
| 8139392 | 2,45 | 5,45 | 0,00375 | 3,34  | 10,13 | 0,00097 | NM_019082       | TIMM17A   |
| 7908766 | 2,45 | 5,45 | 0,00909 | 3,19  | 9,11  | 0,00079 | NM_006335       | RBX1      |
| 8073334 | 2,44 | 5,44 | 0,01921 | 4,61  | 24,50 | 0,00001 | NM_014248       | CTNS      |
| 8003824 | 2,44 | 5,44 | 0,01118 | 3,07  | 8,41  | 0,00005 | NM_004937       | ACTL6A    |
| 8084067 | 2,44 | 5,44 | 0,01915 | 2,99  | 7,97  | 0,00071 | NM_178042       | ASNSD1    |
| 8046997 | 2,44 | 5,44 | 0,01651 | 2,65  | 6,28  | 0,00142 | NM_019048       | RABGAP1   |
| 8157700 | 2,44 | 5,44 | 0,01222 | 3,39  | 10,51 | 0,00003 | NM_012197       | FBXO28    |
| 7909992 | 2,44 | 5,44 | 0,00679 | 2,52  | 5,73  | 0,00066 | NM_015176       | FPGT      |
| 7902308 | 2,44 | 5,44 | 0,03853 | 1,97  | 3,93  | 0,00337 | NM_003838       | VAPA      |
| 8020129 | 2,44 | 5,44 | 0,01775 | 2,89  | 7,42  | 0,00059 | NM_003574       | C16orf87  |
| 8001178 | 2,44 | 5,44 | 0,00011 | 1,49  | 2,81  | 0,00954 | BC056676 ZNF561 |           |
| 8033795 | 2,44 | 5,43 | 0,00854 | 1,15  | 2,22  | 0,03355 | NM_152289       | TRHDE     |
| 7957221 | 2,44 | 5,43 | 0,02094 | -0,91 | -1,87 | 0,00039 | NM_013381       | KRTCAP2   |
| 7920659 | 2,44 | 5,43 | 0,03730 | 2,36  | 5,15  | 0,00927 | NM_173852       | INTS9     |
| 8150014 | 2,44 | 5,43 | 0,00968 | 2,48  | 5,57  | 0,00454 | NM_018250       | DIMT1L    |
| 8112312 | 2,44 | 5,43 | 0,00951 | 3,24  | 9,47  | 0,00030 | NM_014473       | ANXA11    |
| 7934733 | 2,44 | 5,42 | 0,00880 | 2,05  | 4,13  | 0,00105 | NM_145869       | PPHLN1    |
| 7954940 | 2,44 | 5,42 | 0,00233 | 2,17  | 4,51  | 0,00204 | NM_016488       | FBXL2     |
| 8078461 | 2,44 | 5,42 | 0,00368 | 2,47  | 5,53  | 0,00027 | NM_012157       | MOBK1A    |
| 8095566 | 2,44 | 5,42 | 0,01351 | 2,63  | 6,18  | 0,00087 | NM_173468       | MTDH      |
| 8147483 | 2,44 | 5,42 | 0,00171 | 2,39  | 5,24  | 0,02032 | NM_178812       | WARS2     |
| 7919038 | 2,44 | 5,42 | 0,02861 | 2,04  | 4,11  | 0,01507 | NM_201263       | ZNF570    |
| 8028248 | 2,44 | 5,42 | 0,01133 | 2,05  | 4,14  | 0,01045 | NM_144694       | RPL36A    |
| 7946807 | 2,44 | 5,41 | 0,08752 | 1,25  | 2,38  | 0,05552 | NM_021029       | CREB3L1   |
| 7939642 | 2,44 | 5,41 | 0,02597 | 0,10  | 1,07  | 0,32035 | NM_052854       | DYRK1A    |
| 8068551 | 2,44 | 5,41 | 0,01595 | 2,74  | 6,66  | 0,01785 | NM_101395       | ADAMTS1   |
| 8069676 | 2,44 | 5,41 | 0,01473 | -1,47 | -2,77 | 0,00361 | NM_006988       | NIPBL     |
| 8104944 | 2,44 | 5,41 | 0,00978 | 3,09  | 8,50  | 0,01660 | NM_015384       | EEF1G     |
| 7948679 | 2,44 | 5,41 | 0,02244 | 2,36  | 5,15  | 0,05888 | NM_001404       | TMEM14A   |
| 8120239 | 2,43 | 5,39 | 0,05005 | 3,00  | 7,98  | 0,00012 | NM_014051       | SEC13     |
| 8085300 | 2,43 | 5,39 | 0,00069 | 1,54  | 2,91  | 0,09852 | NR_024272       | WDR44     |
| 8169519 | 2,43 | 5,39 | 0,00075 | 1,81  | 3,50  | 0,00374 | NM_019045       | RAB2A     |
| 8146564 | 2,43 | 5,39 | 0,00248 | 2,46  | 5,49  | 0,00602 | NM_002865       | RPRD2     |
| 7905185 | 2,43 | 5,39 | 0,00672 | 3,95  | 15,48 | 0,00820 | NM_015203       | ADHFE1    |
| 8146687 | 2,43 | 5,38 | 0,02717 | -0,18 | -1,14 | 0,18707 | NM_144650       | ZNF429    |
| 8027312 | 2,43 | 5,38 | 0,02572 | 1,01  | 2,01  | 0,12157 | NM_001001415    | STOML2    |
| 8160968 | 2,43 | 5,38 | 0,00106 | 3,73  | 13,27 | 0,00073 | NM_013442       | TTC39C    |
| 8020630 | 2,43 | 5,38 | 0,01174 | 3,29  | 9,80  | 0,00008 | NM_153211       | NMI       |
| 8055702 | 2,43 | 5,38 | 0,01123 | 0,43  | 1,35  | 0,13120 | NM_004688       | TMEM126A  |
| 7942889 | 2,43 | 5,38 | 0,00256 | 1,47  | 2,76  | 0,02143 | NM_032273       | MRPL39    |
| 8069620 | 2,43 | 5,38 | 0,02647 | 3,90  | 14,97 | 0,00003 | NM_080794       | ZNF107    |
| 8133049 | 2,43 | 5,37 | 0,00212 | 1,67  | 3,18  | 0,00798 | NM_016220       | FBXL5     |
| 8099449 | 2,43 | 5,37 | 0,02046 | 4,58  | 23,92 | 0,00020 | NM_033535       | SOC55     |
| 8041820 | 2,42 | 5,37 | 0,00927 | 1,08  | 2,11  | 0,01086 | NM_014011       | SRP9      |
| 7935002 | 2,42 | 5,37 | 0,00138 | 2,39  | 5,26  | 0,00118 | NM_003133       | RALY      |
| 8061966 | 2,42 | 5,34 | 0,01171 | 1,91  | 3,76  | 0,00325 | NM_016732       | SLC4A1AP  |
| 8041015 | 2,42 | 5,34 | 0,00414 | 3,25  | 9,51  | 0,00259 | NM_018158       | ZFYVE16   |
| 8106602 | 2,42 | 5,34 | 0,00446 | 1,79  | 3,45  | 0,00747 | NM_014733       | SYVN1     |
| 7949383 | 2,42 | 5,34 | 0,00574 | 2,83  | 7,13  | 0,00019 | NM_032431       | FAM179B   |
| 7974125 | 2,42 | 5,34 | 0,00487 | 2,18  | 4,53  | 0,00051 | NM_015091       | THOC4     |
| 8019772 | 2,42 | 5,33 | 0,01101 | 3,65  | 12,58 | 0,00036 | NM_005782       | RPS26     |
| 8154363 | 2,41 | 5,33 | 0,05994 | 0,44  | 1,36  | 0,64775 | NM_001029       | SNX17     |

|         |      |      |         |       |       |         |                  |          |
|---------|------|------|---------|-------|-------|---------|------------------|----------|
| 8040908 | 2,41 | 5,33 | 0,01678 | 4,15  | 17,77 | 0,00027 | NM_014748        | PCF11    |
| 7942839 | 2,41 | 5,33 | 0,00342 | 2,68  | 6,40  | 0,00158 | NM_015885        | HNRNPL   |
| 8036613 | 2,41 | 5,33 | 0,02925 | 4,95  | 30,93 | 0,00112 | NM_001533        | LY6E     |
| 8148572 | 2,41 | 5,33 | 0,00046 | 2,63  | 6,19  | 0,00822 | NM_002346        | RAD50    |
| 8107942 | 2,41 | 5,33 | 0,00207 | 1,65  | 3,14  | 0,00680 | NM_005732        | CXorf26  |
| 8168447 | 2,41 | 5,32 | 0,00643 | 2,31  | 4,96  | 0,01214 | BC001220 FAM175A |          |
| 8101489 | 2,41 | 5,32 | 0,02348 | 0,52  | 1,44  | 0,14098 | NM_139076        | KLHDC10  |
| 8136163 | 2,41 | 5,32 | 0,00516 | 3,51  | 11,38 | 0,00358 | NM_014997        | PTPN11   |
| 7958846 | 2,41 | 5,32 | 0,01586 | 2,66  | 6,32  | 0,00136 | NM_002834        | FGFR1    |
| 8150318 | 2,41 | 5,32 | 0,00161 | 0,68  | 1,60  | 0,00177 | NM_023110        | HNRNPA1  |
| 7916562 | 2,41 | 5,32 | 0,10454 | 1,38  | 2,60  | 0,00223 | NM_002136        | RDX      |
| 7951554 | 2,41 | 5,32 | 0,01643 | 2,92  | 7,56  | 0,00006 | NM_002906        | SLC15A4  |
| 7967624 | 2,41 | 5,31 | 0,02629 | 3,68  | 12,85 | 0,00003 | NM_145648        | ---      |
| 8176253 | 2,41 | 5,31 | 0,03851 | 2,35  | 5,10  | 0,03256 | --- ZNF92        | ---      |
| 8133089 | 2,41 | 5,31 | 0,03284 | 3,60  | 12,13 | 0,00023 | NM_152626        | RNASEN   |
| 8111286 | 2,41 | 5,31 | 0,00443 | 3,54  | 11,65 | 0,00048 | NM_013235        | CDC73    |
| 7908437 | 2,41 | 5,31 | 0,03495 | 2,93  | 7,63  | 0,00047 | NM_024529        | CCDC25   |
| 8149942 | 2,41 | 5,31 | 0,00470 | 2,44  | 5,42  | 0,00102 | NM_018246        | ZFP36L2  |
| 8051814 | 2,41 | 5,31 | 0,01629 | 1,28  | 2,43  | 0,09412 | NM_006887        | C2orf29  |
| 8043937 | 2,41 | 5,30 | 0,00133 | 3,09  | 8,50  | 0,00260 | NM_017546        | CCDC59   |
| 7965200 | 2,41 | 5,30 | 0,01021 | 2,50  | 5,65  | 0,01001 | NR_033192        | EIF5A2   |
| 8092073 | 2,41 | 5,30 | 0,00655 | -0,16 | -1,11 | 0,60387 | NM_020390        | USP38    |
| 8097570 | 2,40 | 5,29 | 0,00371 | 2,91  | 7,53  | 0,00580 | NM_032557        | ---      |
| 8172028 | 2,40 | 5,29 | 0,01293 | 2,99  | 7,93  | 0,00024 | --- ATAD1        | ---      |
| 7934870 | 2,40 | 5,29 | 0,01980 | 2,22  | 4,64  | 0,00786 | NM_032810        | PSMD14   |
| 8045946 | 2,40 | 5,29 | 0,01587 | 2,66  | 6,30  | 0,00158 | NM_005805        | POLR1D   |
| 7968254 | 2,40 | 5,29 | 0,02275 | 1,92  | 3,78  | 0,01349 | NM_152705        | JMJD1C   |
| 7933877 | 2,40 | 5,28 | 0,00810 | 3,16  | 8,92  | 0,01226 | NM_004241        | SACM1L   |
| 8079346 | 2,40 | 5,28 | 0,01543 | 2,27  | 4,82  | 0,00010 | NM_014016        | RNF216L  |
| 8131286 | 2,40 | 5,28 | 0,00035 | 2,92  | 7,56  | 0,00103 | NR_023384        | SELT     |
| 8083352 | 2,40 | 5,28 | 0,12099 | 5,15  | 35,42 | 0,00067 | NM_016275        | FIGN     |
| 8056323 | 2,40 | 5,28 | 0,00621 | 3,13  | 8,75  | 0,00017 | NM_018086        | OSGIN2   |
| 8147221 | 2,40 | 5,27 | 0,00145 | 2,57  | 5,93  | 0,00481 | NM_004337        | POLK     |
| 8106303 | 2,40 | 5,27 | 0,00548 | 1,70  | 3,25  | 0,00411 | NM_016218        | HLCS     |
| 8070239 | 2,40 | 5,27 | 0,01138 | 3,33  | 10,03 | 0,00693 | NM_000411        | SS18     |
| 8022625 | 2,40 | 5,26 | 0,00197 | 1,87  | 3,66  | 0,00495 | NM_001007559     | C19orf10 |
| 8032863 | 2,40 | 5,26 | 0,00506 | 1,42  | 2,68  | 0,03024 | NM_019107        | FKTN     |
| 8157074 | 2,40 | 5,26 | 0,02072 | 4,00  | 15,99 | 0,00010 | NM_001079802     | KIRREL   |
| 7906307 | 2,39 | 5,26 | 0,00152 | 2,46  | 5,49  | 0,00303 | NM_018240        | ANAPC1   |
| 8053610 | 2,39 | 5,25 | 0,04875 | 3,24  | 9,43  | 0,00001 | NM_022662        | PRELID1  |
| 8110318 | 2,39 | 5,25 | 0,02665 | 1,97  | 3,91  | 0,00431 | NM_013237        | ATXN7    |
| 8080878 | 2,39 | 5,25 | 0,00423 | 3,22  | 9,29  | 0,00045 | NM_000333        | ACIN1    |
| 7973371 | 2,39 | 5,24 | 0,01014 | 3,09  | 8,50  | 0,00040 | NM_001164814     | TARDBP   |
| 7897663 | 2,39 | 5,24 | 0,02657 | 3,16  | 8,95  | 0,00009 | NM_007375        | SMARCC2  |
| 7963988 | 2,39 | 5,24 | 0,00031 | 3,23  | 9,36  | 0,00098 | NM_003075        | UBA1     |
| 8167069 | 2,39 | 5,24 | 0,00058 | 3,09  | 8,54  | 0,00156 | NM_003334        | TLN1     |
| 8161056 | 2,39 | 5,24 | 0,01077 | 2,11  | 4,32  | 0,01202 | NM_006289        | SEMA5A   |
| 8110932 | 2,39 | 5,24 | 0,01416 | -1,32 | -2,49 | 0,08679 | NM_003966        | FAM18B2  |
| 8005501 | 2,39 | 5,24 | 0,00735 | 2,13  | 4,39  | 0,00027 | NM_001135036     | 14. Sep  |
| 7911329 | 2,39 | 5,24 | 0,11015 | 1,60  | 3,03  | 0,35347 | NM_207366        | PWP1     |
| 7958379 | 2,39 | 5,23 | 0,00656 | 2,83  | 7,12  | 0,00050 | NM_007062        | ACLY     |
| 8015460 | 2,39 | 5,23 | 0,01353 | 3,58  | 11,94 | 0,00054 | NM_001096        | IFT80    |
| 8091737 | 2,39 | 5,23 | 0,02821 | 3,23  | 9,35  | 0,00086 | NM_020800        | GATAD2B  |
| 7920341 | 2,39 | 5,23 | 0,00145 | 4,56  | 23,61 | 0,00142 | NM_020699        | SIDT2    |
| 7944049 | 2,39 | 5,23 | 0,00966 | 2,04  | 4,11  | 0,00975 | NM_001040455     | MRPL30   |
| 8043848 | 2,39 | 5,22 | 0,01166 | 2,33  | 5,05  | 0,00267 | NM_145212        | ZFP36    |
| 8028652 | 2,38 | 5,22 | 0,01403 | 1,52  | 2,87  | 0,09568 | NM_003407        | COX6A1   |
| 8119153 | 2,38 | 5,22 | 0,00105 | 2,60  | 6,06  | 0,00060 | NM_004373        | C2orf43  |
| 8050608 | 2,38 | 5,22 | 0,00481 | 3,20  | 9,20  | 0,00106 | BC017473 YBX1    |          |
| 7900585 | 2,38 | 5,22 | 0,03637 | 0,68  | 1,60  | 0,05773 | NM_004559        | PALLD    |
| 8098263 | 2,38 | 5,22 | 0,00297 | 2,16  | 4,46  | 0,01160 | NM_001166108     | YIPF1    |
| 7916343 | 2,38 | 5,22 | 0,00766 | 1,87  | 3,65  | 0,00054 | NM_018982        | CSTF1    |
| 8063484 | 2,38 | 5,21 | 0,00325 | 3,75  | 13,49 | 0,00100 | NM_001033522     | PLAG1    |
| 8150881 | 2,38 | 5,21 | 0,03297 | 4,16  | 17,82 | 0,00004 | NM_002655        | USP24    |
| 7916443 | 2,38 | 5,21 | 0,00671 | 3,79  | 13,81 | 0,00152 | NM_015306        | BLOC1S1  |
| 7956013 | 2,38 | 5,21 | 0,02636 | 1,84  | 3,57  | 0,00010 | NM_001487        | SLC2A10  |
| 8063177 | 2,38 | 5,21 | 0,00602 | 1,15  | 2,22  | 0,03165 | NM_030777        | FBXO10   |
| 8161229 | 2,38 | 5,21 | 0,01796 | 3,65  | 12,54 | 0,00008 | NM_012166        | MED1     |
| 8014841 | 2,38 | 5,21 | 0,02385 | 3,88  | 14,76 | 0,00038 | NM_004774        | TMEM133  |
| 7943369 | 2,38 | 5,21 | 0,00261 | 2,56  | 5,90  | 0,00299 | NM_032021        | CHURC1   |
| 7975113 | 2,38 | 5,20 | 0,01879 | 3,09  | 8,51  | 0,01043 | NM_145165        | OXCT1    |
| 8111892 | 2,38 | 5,20 | 0,01642 | 3,22  | 9,32  | 0,00011 | NM_000436        | WNK1     |
| 7952953 | 2,38 | 5,20 | 0,00040 | 2,44  | 5,42  | 0,01610 | NM_018979        | VAPB     |

|         |      |      |         |       |       |         |                 |           |
|---------|------|------|---------|-------|-------|---------|-----------------|-----------|
| 8063620 | 2,38 | 5,20 | 0,01144 | 2,87  | 7,33  | 0,00003 | NM_004738       | XBP1      |
| 8075182 | 2,38 | 5,20 | 0,00747 | 2,37  | 5,15  | 0,00876 | NM_005080       | IARS2     |
| 7909815 | 2,38 | 5,20 | 0,00605 | 3,24  | 9,44  | 0,00253 | NM_018060       | BACH1     |
| 8068105 | 2,38 | 5,20 | 0,01766 | 1,56  | 2,94  | 0,01086 | NR_027655       | HSD17B4   |
| 8107532 | 2,38 | 5,19 | 0,04671 | 3,56  | 11,78 | 0,00005 | NM_000414       | TBC1D7    |
| 8123961 | 2,38 | 5,19 | 0,00320 | 2,57  | 5,93  | 0,00025 | NM_016495       | RBM16     |
| 8122909 | 2,38 | 5,19 | 0,00384 | 2,20  | 4,59  | 0,00347 | NM_014892       | SPRY4     |
| 8114797 | 2,38 | 5,19 | 0,03881 | 0,81  | 1,76  | 0,04392 | NM_030964       | FTO       |
| 7995655 | 2,38 | 5,19 | 0,01568 | 2,57  | 5,93  | 0,00004 | NM_001080432    | TRIB1     |
| 8148304 | 2,37 | 5,19 | 0,01006 | 2,76  | 6,76  | 0,00020 | NM_025195       | RPF1      |
| 7902634 | 2,37 | 5,19 | 0,00329 | 1,92  | 3,78  | 0,04348 | NM_025065       | DCBLD1    |
| 8121685 | 2,37 | 5,19 | 0,00995 | 2,11  | 4,32  | 0,00027 | NM_173674       | LRRC16A   |
| 8117243 | 2,37 | 5,19 | 0,00165 | 2,74  | 6,67  | 0,00161 | NM_017640       | LITAF     |
| 7999468 | 2,37 | 5,18 | 0,02549 | 2,85  | 7,20  | 0,00284 | NM_004862       | FAM92A2   |
| 7982876 | 2,37 | 5,18 | 0,01346 | 0,82  | 1,76  | 0,48756 | ENST00000287660 | SUCLG1    |
| 8053366 | 2,37 | 5,18 | 0,02071 | 2,22  | 4,66  | 0,00119 | NM_003849       | STX8      |
| 8012581 | 2,37 | 5,17 | 0,00908 | 1,70  | 3,26  | 0,01864 | NM_004853       | C8orf59   |
| 8151587 | 2,37 | 5,17 | 0,01533 | 1,77  | 3,41  | 0,00762 | NM_001099670    | CTBS      |
| 7917240 | 2,37 | 5,17 | 0,03777 | 2,66  | 6,31  | 0,00139 | NM_004388       | VPS25     |
| 8007355 | 2,37 | 5,17 | 0,00502 | 3,20  | 9,19  | 0,00005 | NM_032353       | TRIO      |
| 8104506 | 2,37 | 5,17 | 0,00279 | 3,23  | 9,37  | 0,00011 | NM_007118       | SLC30A5   |
| 8105801 | 2,37 | 5,16 | 0,00223 | 2,92  | 7,58  | 0,00016 | NM_022902       | IMPAD1    |
| 8150908 | 2,37 | 5,16 | 0,01038 | 3,04  | 8,24  | 0,00057 | NM_017813       | RCOR3     |
| 7909529 | 2,37 | 5,16 | 0,00358 | 2,26  | 4,78  | 0,00247 | NM_001136223    | YEATS2    |
| 8084232 | 2,37 | 5,16 | 0,01388 | 3,36  | 10,30 | 0,00015 | NM_018023       | BAZ1A     |
| 7978595 | 2,37 | 5,16 | 0,00027 | 3,23  | 9,40  | 0,01310 | NM_013448       | C9orf78   |
| 8164596 | 2,37 | 5,15 | 0,00482 | 2,69  | 6,46  | 0,00107 | NM_016520       | CAPN7     |
| 8078110 | 2,36 | 5,15 | 0,00488 | 3,13  | 8,76  | 0,01271 | NM_014296       | GALNT2    |
| 7910427 | 2,36 | 5,15 | 0,03300 | 2,45  | 5,48  | 0,01378 | NM_004481       | IVNS1ABP  |
| 7922889 | 2,36 | 5,14 | 0,02432 | 3,83  | 14,22 | 0,00079 | NM_006469       | SLC1A1    |
| 8154135 | 2,36 | 5,14 | 0,04513 | 1,14  | 2,21  | 0,07830 | NM_004170       | C5orf32   |
| 8108478 | 2,36 | 5,14 | 0,01510 | 2,94  | 7,69  | 0,00100 | NM_032412       | SRP68     |
| 8018600 | 2,36 | 5,13 | 0,00595 | 3,35  | 10,22 | 0,00008 | NM_014230       | ATP6V0A1  |
| 8007228 | 2,36 | 5,13 | 0,02733 | 4,43  | 21,62 | 0,00072 | NM_001130020    | ING4      |
| 7960654 | 2,36 | 5,12 | 0,00131 | 2,51  | 5,71  | 0,00039 | NM_016162       | TDP1      |
| 7976160 | 2,36 | 5,12 | 0,00747 | 3,58  | 11,93 | 0,00098 | NM_018319       | RPL26L1   |
| 7945740 | 2,36 | 5,12 | 0,00329 | 1,08  | 2,12  | 0,03790 | NM_016093       | ANXA7     |
| 7934367 | 2,36 | 5,12 | 0,02596 | 3,12  | 8,69  | 0,00305 | NM_004034       | LONP2     |
| 7995421 | 2,36 | 5,12 | 0,01153 | 2,05  | 4,13  | 0,00132 | NM_031490       | PURA      |
| 8108472 | 2,36 | 5,12 | 0,01064 | 2,82  | 7,05  | 0,00079 | NM_005859       | DNAJC21   |
| 8104838 | 2,36 | 5,12 | 0,00829 | 1,97  | 3,91  | 0,00674 | NM_194283       | FARP1     |
| 7969736 | 2,35 | 5,11 | 0,00560 | 1,95  | 3,87  | 0,00007 | NM_005766       | C6orf145  |
| 8123678 | 2,35 | 5,11 | 0,00490 | 3,92  | 15,09 | 0,00004 | NM_183373       | MON2      |
| 7956697 | 2,35 | 5,11 | 0,01968 | 2,38  | 5,21  | 0,00683 | NM_015026       | PDE7B     |
| 8122222 | 2,35 | 5,11 | 0,01237 | -0,96 | -1,95 | 0,00570 | NM_018945       | EIF4G3    |
| 7913319 | 2,35 | 5,11 | 0,00656 | 2,08  | 4,23  | 0,00009 | NM_003760       | PTBP2     |
| 7903188 | 2,35 | 5,11 | 0,00201 | 2,13  | 4,37  | 0,00658 | NM_021190       | UBE2E1    |
| 8078262 | 2,35 | 5,11 | 0,00814 | 2,88  | 7,36  | 0,00011 | NM_003341       | TCF21     |
| 8122176 | 2,35 | 5,11 | 0,02217 | -1,35 | -2,54 | 0,01787 | NM_003206       | G2E3      |
| 7973756 | 2,35 | 5,10 | 0,01675 | 3,13  | 8,77  | 0,00093 | NM_017769       | MAP3K12   |
| 7963670 | 2,35 | 5,10 | 0,00789 | 1,76  | 3,38  | 0,00056 | NM_006301       | WASF2     |
| 7914094 | 2,35 | 5,10 | 0,04795 | 3,67  | 12,72 | 0,00414 | NM_006990       | SPOCK1    |
| 8114287 | 2,35 | 5,10 | 0,01427 | -1,04 | -2,06 | 0,06449 | NM_004598       | RNF181    |
| 8043209 | 2,35 | 5,10 | 0,00691 | 0,83  | 1,78  | 0,05265 | NM_016494       | OS9       |
| 7956593 | 2,35 | 5,10 | 0,00643 | 3,59  | 12,01 | 0,00021 | NM_006812       | ZBTB33    |
| 8169683 | 2,35 | 5,10 | 0,04634 | 2,26  | 4,80  | 0,00464 | NM_006777       | C16orf62  |
| 7993680 | 2,35 | 5,10 | 0,03108 | 3,09  | 8,51  | 0,00002 | BC050464 NBEAL1 |           |
| 8047606 | 2,35 | 5,10 | 0,00187 | 2,97  | 7,86  | 0,00011 | NM_001114132    | SNRPA     |
| 8028916 | 2,35 | 5,09 | 0,00267 | 2,60  | 6,06  | 0,00006 | NM_004596       | WDR1      |
| 8099340 | 2,35 | 5,09 | 0,00544 | 3,52  | 11,51 | 0,00033 | NM_017491       | TEX10     |
| 8162850 | 2,35 | 5,09 | 0,00355 | 2,43  | 5,37  | 0,00161 | NM_017746       | FBXW2     |
| 8163784 | 2,35 | 5,09 | 0,00738 | 3,57  | 11,84 | 0,00311 | NM_012164       | PRUNE2    |
| 8161865 | 2,35 | 5,09 | 0,05364 | -0,39 | -1,31 | 0,15247 | NM_015225       | EIF6      |
| 8065868 | 2,35 | 5,09 | 0,01249 | 2,68  | 6,42  | 0,00036 | NM_002212       | HSD11B1   |
| 7909446 | 2,35 | 5,08 | 0,03170 | -0,68 | -1,60 | 0,02711 | NM_005525       | MBD2      |
| 8023382 | 2,35 | 5,08 | 0,01005 | 1,41  | 2,66  | 0,02573 | NM_003927       | ADAM17    |
| 8050190 | 2,35 | 5,08 | 0,01389 | 4,01  | 16,07 | 0,00021 | NM_003183       | RDH11     |
| 7979743 | 2,35 | 5,08 | 0,01368 | 3,58  | 11,95 | 0,00016 | NM_016026       | ABCC1     |
| 7993478 | 2,34 | 5,08 | 0,00339 | 3,43  | 10,79 | 0,00150 | NM_004996       | PFDN5     |
| 7955768 | 2,34 | 5,08 | 0,01223 | 2,56  | 5,90  | 0,00200 | NM_002624       | HIPK1     |
| 7904137 | 2,34 | 5,07 | 0,00220 | 2,75  | 6,73  | 0,00821 | NM_198268       | H3F3A     |
| 7910124 | 2,34 | 5,07 | 0,02995 | 2,07  | 4,19  | 0,00015 | NM_002107       | LHFPL2    |
| 8112803 | 2,34 | 5,07 | 0,00399 | 1,34  | 2,52  | 0,00023 | NM_005779       | LOC441722 |

|         |      |      |         |       |       |         |                 |          |
|---------|------|------|---------|-------|-------|---------|-----------------|----------|
| 7982529 | 2,34 | 5,07 | 0,00276 | 1,56  | 2,96  | 0,01480 | ENST00000454093 | TTPAL    |
| 8062844 | 2,34 | 5,07 | 0,01170 | 3,07  | 8,38  | 0,00004 | NM_024331       | FXR1     |
| 8084146 | 2,34 | 5,07 | 0,01149 | 2,65  | 6,28  | 0,00097 | NM_001013439    | PGAP2    |
| 7937892 | 2,34 | 5,07 | 0,01601 | 5,08  | 33,74 | 0,00002 | NR_027015       | TANK     |
| 8045933 | 2,34 | 5,06 | 0,00815 | 1,17  | 2,25  | 0,01105 | NM_004180       | ZNFX1    |
| 8066905 | 2,34 | 5,06 | 0,00115 | 3,45  | 10,92 | 0,00013 | NM_021035       | POLH     |
| 8119858 | 2,34 | 5,06 | 0,01374 | 2,51  | 5,69  | 0,00017 | NM_006502       | PSMA5    |
| 7918345 | 2,34 | 5,06 | 0,00335 | 1,99  | 3,98  | 0,00534 | NM_002790       | RASGRF2  |
| 8106660 | 2,34 | 5,06 | 0,00369 | -0,16 | -1,12 | 0,69890 | NM_006909       | IBTK     |
| 8127787 | 2,34 | 5,06 | 0,01874 | 3,19  | 9,13  | 0,00288 | NM_015525       | MTA2     |
| 7948696 | 2,34 | 5,06 | 0,00715 | 3,58  | 11,95 | 0,00271 | NM_004739       | CCNB1    |
| 8105828 | 2,34 | 5,06 | 0,02698 | 3,25  | 9,54  | 0,00628 | NM_031966       | SLC39A8  |
| 8101992 | 2,34 | 5,05 | 0,00042 | 2,97  | 7,82  | 0,00325 | NM_022154       | ZFPM2    |
| 8147837 | 2,34 | 5,05 | 0,00231 | -0,22 | -1,17 | 0,52731 | NM_012082       | TNS3     |
| 8139500 | 2,34 | 5,05 | 0,00372 | 2,37  | 5,17  | 0,00015 | NM_022748       | SP1      |
| 7955787 | 2,34 | 5,05 | 0,04126 | 3,98  | 15,74 | 0,00005 | NM_138473       | RPL15    |
| 8116929 | 2,33 | 5,04 | 0,08150 | 3,65  | 12,54 | 0,00002 | NM_002948       | RAB4A    |
| 7910398 | 2,33 | 5,04 | 0,00741 | 2,89  | 7,40  | 0,00020 | NM_004578       | CLIP4    |
| 8041179 | 2,33 | 5,04 | 0,01179 | 3,67  | 12,70 | 0,00010 | NM_024692       | PTGES3   |
| 7964250 | 2,33 | 5,03 | 0,02661 | 4,36  | 20,60 | 0,00036 | NM_006601       | NCAPD2   |
| 7953351 | 2,33 | 5,03 | 0,00177 | 3,47  | 11,10 | 0,00093 | NM_014865       | C10orf18 |
| 7925978 | 2,33 | 5,03 | 0,00991 | 3,51  | 11,36 | 0,00646 | NM_017782       | ZBTB11   |
| 8089234 | 2,33 | 5,03 | 0,00386 | 2,37  | 5,18  | 0,00840 | NM_014415       | TSPAN5   |
| 8101828 | 2,33 | 5,03 | 0,07199 | 3,07  | 8,41  | 0,00031 | NM_005723       | C13orf23 |
| 7971134 | 2,33 | 5,03 | 0,00789 | 3,28  | 9,69  | 0,01082 | NM_025138       | ZNF415   |
| 8039044 | 2,33 | 5,02 | 0,00913 | -0,79 | -1,73 | 0,00355 | NR_028343       | TMEM177  |
| 8044844 | 2,33 | 5,02 | 0,08710 | 2,73  | 6,62  | 0,00252 | NM_001105198    | SLMAP    |
| 8080685 | 2,33 | 5,02 | 0,00892 | 2,30  | 4,92  | 0,00059 | NM_007159       | ZRANB1   |
| 7931226 | 2,33 | 5,02 | 0,02256 | 3,03  | 8,19  | 0,00143 | NM_017580       | PPAPDC1B |
| 8150276 | 2,33 | 5,02 | 0,00527 | 2,19  | 4,56  | 0,01586 | NM_001102559    | EIF4B    |
| 8135268 | 2,33 | 5,02 | 0,00326 | 1,70  | 3,25  | 0,21867 | NM_001417       | ZNF652   |
| 8016546 | 2,33 | 5,02 | 0,03319 | 2,11  | 4,33  | 0,00008 | NM_014897       | EML1     |
| 7976698 | 2,33 | 5,01 | 0,02247 | 1,17  | 2,25  | 0,01539 | NM_001008707    | NCBP2    |
| 8093156 | 2,33 | 5,01 | 0,05542 | 3,28  | 9,72  | 0,00036 | NM_007362       | IDH3A    |
| 7985134 | 2,33 | 5,01 | 0,01568 | 4,53  | 23,10 | 0,00082 | NM_005530       | HINT2    |
| 8161147 | 2,33 | 5,01 | 0,01435 | 3,31  | 9,94  | 0,00016 | NM_032593       | GBAP1    |
| 7920687 | 2,33 | 5,01 | 0,02147 | 2,48  | 5,59  | 0,00472 | NR_002188       | GOSR1    |
| 8006148 | 2,32 | 5,01 | 0,00525 | 3,28  | 9,73  | 0,00183 | NM_004871       | PIR      |
| 8171435 | 2,32 | 5,01 | 0,01781 | 2,53  | 5,79  | 0,00320 | NM_003662       | TSC22D2  |
| 8083324 | 2,32 | 5,01 | 0,00051 | 1,25  | 2,37  | 0,13731 | NM_014779       | CSTB     |
| 8070701 | 2,32 | 5,01 | 0,02129 | 2,33  | 5,04  | 0,01045 | NM_000100       | PIKFYVE  |
| 8047865 | 2,32 | 5,00 | 0,00336 | 2,28  | 4,85  | 0,02018 | NM_015040       | CELF1    |
| 7947894 | 2,32 | 5,00 | 0,02982 | 2,87  | 7,32  | 0,00343 | NM_001172639    | ASTE1    |
| 8090664 | 2,32 | 5,00 | 0,01887 | 1,80  | 3,48  | 0,00220 | NM_014065       | GTPBP10  |
| 8134079 | 2,32 | 5,00 | 0,00608 | 3,60  | 12,13 | 0,00059 | NM_033107       | TOPBP1   |
| 8090772 | 2,32 | 5,00 | 0,00620 | 3,42  | 10,73 | 0,00144 | NM_007027       | PSMD5    |
| 8163795 | 2,32 | 4,99 | 0,00640 | 3,09  | 8,49  | 0,00194 | NM_005047       | PLXNB2   |
| 8076998 | 2,32 | 4,98 | 0,00250 | 2,31  | 4,96  | 0,00901 | NM_012401       | ATP6V1H  |
| 8150797 | 2,32 | 4,98 | 0,00807 | 1,92  | 3,79  | 0,00253 | NM_015941       | OSBPL10  |
| 8085984 | 2,31 | 4,97 | 0,00204 | 2,47  | 5,53  | 0,00605 | NM_017784       | BMPR1A   |
| 7952305 | 2,31 | 4,97 | 0,01836 | 4,10  | 17,09 | 0,00134 | NM_004329       | C11orf30 |
| 7942650 | 2,31 | 4,97 | 0,01273 | 2,86  | 7,24  | 0,00801 | NM_020193       | KIAA1143 |
| 8086498 | 2,31 | 4,97 | 0,00410 | 1,81  | 3,51  | 0,00850 | NM_020696       | NOL9     |
| 7912086 | 2,31 | 4,96 | 0,00792 | 2,05  | 4,15  | 0,02428 | NM_024654       | GSTM3    |
| 7918379 | 2,31 | 4,96 | 0,01740 | 1,17  | 2,25  | 0,01094 | NM_000849       | RPA2     |
| 7914141 | 2,31 | 4,95 | 0,01758 | 3,13  | 8,78  | 0,00005 | NM_002946       | MRPL17   |
| 7946267 | 2,31 | 4,95 | 0,02662 | 2,93  | 7,60  | 0,01431 | NM_022061       | SLC43A3  |
| 7948229 | 2,31 | 4,95 | 0,00666 | 1,64  | 3,13  | 0,00306 | NM_017611       | MFSD5    |
| 7955729 | 2,31 | 4,94 | 0,02141 | 3,48  | 11,14 | 0,00005 | NM_001170790    | ---      |
| 8122198 | 2,31 | 4,94 | 0,30409 | -0,68 | -1,60 | 0,28259 | --- SELM        | ---      |
| 8075462 | 2,30 | 4,94 | 0,04288 | 0,63  | 1,55  | 0,27948 | NM_080430       | TSPAN4   |
| 7937518 | 2,30 | 4,94 | 0,00504 | 2,41  | 5,32  | 0,00510 | NM_001025237    | SUSD1    |
| 8163383 | 2,30 | 4,94 | 0,00842 | 3,63  | 12,36 | 0,00001 | NM_022486       | RNF41    |
| 7964021 | 2,30 | 4,94 | 0,00429 | 2,92  | 7,56  | 0,00085 | NM_194358       | SLC2A12  |
| 8129666 | 2,30 | 4,93 | 0,00135 | 0,99  | 1,99  | 0,00797 | NM_145176       | EIF5B    |
| 8043861 | 2,30 | 4,93 | 0,00284 | 1,48  | 2,79  | 0,08708 | NM_015904       | TIPRL    |
| 7907124 | 2,30 | 4,93 | 0,01363 | 2,81  | 7,01  | 0,00072 | NM_152902       | PRKAB2   |
| 7919305 | 2,30 | 4,92 | 0,02314 | 2,88  | 7,37  | 0,00003 | NM_005399       | TCEB3    |
| 7898881 | 2,30 | 4,92 | 0,00271 | 2,90  | 7,46  | 0,00001 | NM_003198       | ACTB     |
| 8137979 | 2,30 | 4,91 | 0,04507 | 1,54  | 2,90  | 0,00071 | NM_001101       | RCBTB1   |
| 7971602 | 2,30 | 4,91 | 0,01621 | 2,55  | 5,84  | 0,00244 | NM_018191       | VPS37A   |
| 8144774 | 2,30 | 4,91 | 0,01001 | 0,79  | 1,73  | 0,13989 | NM_152415       | DMXL2    |
| 7988789 | 2,30 | 4,91 | 0,00447 | 3,24  | 9,42  | 0,01688 | NM_001174116    | STAT2    |

|         |      |      |         |       |       |         |                |          |
|---------|------|------|---------|-------|-------|---------|----------------|----------|
| 7964119 | 2,30 | 4,91 | 0,04589 | 2,39  | 5,24  | 0,00244 | NM_005419      | NIPAL3   |
| 7898939 | 2,29 | 4,91 | 0,00904 | 2,61  | 6,10  | 0,00021 | NM_020448      | TEX261   |
| 8052925 | 2,29 | 4,90 | 0,00566 | 2,97  | 7,86  | 0,00141 | NM_144582      | RPS27A   |
| 8042052 | 2,29 | 4,90 | 0,00191 | 1,64  | 3,12  | 0,00526 | NM_002954      | TAF1B    |
| 8040173 | 2,29 | 4,90 | 0,03334 | 3,30  | 9,86  | 0,00055 | NM_005680      | ASCC1    |
| 7934228 | 2,29 | 4,90 | 0,00445 | 1,81  | 3,52  | 0,00767 | NM_015947      | CCDC109A |
| 7928318 | 2,29 | 4,90 | 0,01787 | 3,20  | 9,18  | 0,00685 | NM_138357      | SNX4     |
| 8090256 | 2,29 | 4,89 | 0,00627 | 2,81  | 7,02  | 0,00461 | NM_003794      | EI24     |
| 7944978 | 2,29 | 4,89 | 0,01030 | 5,06  | 33,34 | 0,00109 | NM_004879      | POLR2D   |
| 8055089 | 2,29 | 4,89 | 0,02334 | 2,08  | 4,23  | 0,00181 | NM_004805      | ATG7     |
| 8077858 | 2,29 | 4,89 | 0,00083 | 1,42  | 2,68  | 0,00066 | NM_006395      | ABHD4    |
| 7973306 | 2,29 | 4,89 | 0,01395 | 4,19  | 18,27 | 0,00124 | NM_022060      | COX7A2L  |
| 8051777 | 2,29 | 4,89 | 0,00685 | 1,25  | 2,37  | 0,02620 | NM_004718      | UTRN     |
| 8122464 | 2,29 | 4,89 | 0,00099 | 1,67  | 3,19  | 0,03225 | NM_007124      | ACTR8    |
| 8088151 | 2,29 | 4,89 | 0,00302 | 2,91  | 7,53  | 0,00006 | NM_022899      | ABCF2    |
| 8143905 | 2,29 | 4,89 | 0,03652 | 1,83  | 3,55  | 0,00585 | NM_007189      | PROS1    |
| 8089011 | 2,29 | 4,88 | 0,02363 | 1,90  | 3,72  | 0,01327 | NM_000313      | BTN3A1   |
| 8117458 | 2,29 | 4,88 | 0,00029 | 2,04  | 4,12  | 0,00028 | NM_001145009   | GMPPA    |
| 8048595 | 2,29 | 4,88 | 0,01043 | 2,46  | 5,51  | 0,00129 | NM_013335      | AMMECR1  |
| 8174496 | 2,29 | 4,88 | 0,01255 | 1,52  | 2,87  | 0,00216 | NM_015365      | MRPS14   |
| 7922462 | 2,29 | 4,88 | 0,06335 | 2,71  | 6,54  | 0,00347 | NM_022100      | MT1F     |
| 7995825 | 2,29 | 4,88 | 0,01767 | 4,38  | 20,81 | 0,00014 | NM_005949      | NCOA1    |
| 8040552 | 2,29 | 4,87 | 0,01209 | 2,59  | 6,01  | 0,00211 | NM_147223      | USP15    |
| 7956670 | 2,29 | 4,87 | 0,00563 | 2,40  | 5,26  | 0,00871 | NM_006313      | ACTR1A   |
| 7936028 | 2,28 | 4,87 | 0,00686 | 2,19  | 4,56  | 0,00171 | NM_005736      | TRIM24   |
| 8136473 | 2,28 | 4,87 | 0,00116 | 1,64  | 3,11  | 0,06927 | NM_015905      | ERAL1    |
| 8005994 | 2,28 | 4,87 | 0,04666 | 3,71  | 13,10 | 0,00039 | NM_005702      | MED27    |
| 8112890 | 2,28 | 4,87 | 0,00736 | 1,79  | 3,45  | 0,00579 | NM_004269      | TOM11L2  |
| 8013159 | 2,28 | 4,87 | 0,01856 | 2,60  | 6,07  | 0,00018 | NM_001082968   | TCEA1    |
| 8078600 | 2,28 | 4,86 | 0,00633 | 3,69  | 12,90 | 0,00379 | NM_006756      | SMN1     |
| 8106006 | 2,28 | 4,86 | 0,00032 | 2,90  | 7,45  | 0,00015 | NM_000344      | LASS5    |
| 7963174 | 2,28 | 4,86 | 0,03210 | 4,07  | 16,82 | 0,00004 | NM_147190      | RCN1     |
| 7947358 | 2,28 | 4,86 | 0,01375 | 1,50  | 2,82  | 0,02077 | NM_002901      | SOAT1    |
| 7907702 | 2,28 | 4,86 | 0,00910 | 2,85  | 7,23  | 0,00011 | NM_003101      | PSMD13   |
| 7937287 | 2,28 | 4,85 | 0,03419 | 2,36  | 5,12  | 0,00176 | NM_002817      | AUH      |
| 8162264 | 2,28 | 4,85 | 0,00128 | 2,70  | 6,49  | 0,00004 | NM_001698      | CCDC90A  |
| 8124008 | 2,28 | 4,85 | 0,00712 | 2,31  | 4,96  | 0,00348 | NM_001031713   | ABCF1    |
| 8117929 | 2,28 | 4,85 | 0,01768 | 2,49  | 5,63  | 0,00035 | NM_001025091   | ABCF1    |
| 8177797 | 2,28 | 4,85 | 0,01768 | 2,49  | 5,63  | 0,00035 | NM_001025091   | ABCF1    |
| 8179112 | 2,28 | 4,85 | 0,01768 | 2,49  | 5,63  | 0,00035 | NM_001025091   | TAF5L    |
| 7924969 | 2,28 | 4,85 | 0,01319 | 2,98  | 7,89  | 0,00664 | NM_014409      | PHF6     |
| 8169969 | 2,28 | 4,85 | 0,00695 | 2,75  | 6,72  | 0,00057 | NM_032458      | ZNF766   |
| 8030899 | 2,28 | 4,84 | 0,01023 | 1,92  | 3,79  | 0,01747 | NM_001010851   | BBS10    |
| 7965060 | 2,28 | 4,84 | 0,00938 | 1,82  | 3,52  | 0,04058 | NM_024685      | ---      |
| 7991835 | 2,28 | 4,84 | 0,21024 | 0,14  | 1,10  | 0,86524 | ---            | MACF1    |
| 7900235 | 2,27 | 4,84 | 0,00713 | 2,42  | 5,34  | 0,00423 | NM_012090      | MT1G     |
| 8001531 | 2,27 | 4,83 | 0,02984 | 1,72  | 3,30  | 0,00352 | NM_005950      | CAB39L   |
| 7971590 | 2,27 | 4,83 | 0,00121 | 0,63  | 1,54  | 0,24237 | NM_030925      | DAP      |
| 8110982 | 2,27 | 4,83 | 0,00807 | 2,98  | 7,87  | 0,00153 | NM_004394      | UEVLD    |
| 7947027 | 2,27 | 4,83 | 0,02906 | 2,54  | 5,83  | 0,00106 | NM_001040697   | POM121C  |
| 8140297 | 2,27 | 4,83 | 0,00181 | 3,10  | 8,56  | 0,00055 | NM_001099415   | INHBA    |
| 8139207 | 2,27 | 4,82 | 0,01637 | -0,68 | -1,60 | 0,02456 | NM_002192      | SMPD1    |
| 7938100 | 2,27 | 4,82 | 0,00659 | 0,72  | 1,64  | 0,02930 | NM_000543      | C5orf30  |
| 8107194 | 2,27 | 4,82 | 0,01371 | 3,13  | 8,75  | 0,00104 | BC009203 RPL21 |          |
| 7999360 | 2,27 | 4,82 | 0,07025 | 0,67  | 1,59  | 0,12941 | NM_000982      | NBR1     |
| 8007471 | 2,27 | 4,82 | 0,05299 | 3,45  | 10,96 | 0,00220 | NM_031858      | SLC5A3   |
| 8068361 | 2,27 | 4,81 | 0,00871 | 3,89  | 14,78 | 0,00034 | NM_006933      | SDC2     |
| 8147461 | 2,27 | 4,81 | 0,04423 | 1,35  | 2,55  | 0,00002 | NM_002998      | RPS27L   |
| 7989493 | 2,27 | 4,81 | 0,02666 | 1,22  | 2,33  | 0,08645 | NM_015920      | KDM1A    |
| 7898833 | 2,27 | 4,81 | 0,00375 | 3,74  | 13,37 | 0,00047 | NM_001009999   | NUP107   |
| 7956949 | 2,26 | 4,80 | 0,00645 | 3,11  | 8,65  | 0,00035 | NM_020401      | SNORD13  |
| 8145793 | 2,26 | 4,80 | 0,20420 | -2,01 | -4,03 | 0,44537 | NR_003041      | UBE2D4   |
| 8132523 | 2,26 | 4,80 | 0,02816 | 2,75  | 6,75  | 0,00264 | NM_015983      | ITGA4    |
| 8046695 | 2,26 | 4,80 | 0,00897 | -0,51 | -1,42 | 0,00315 | NM_000885      | FHL2     |
| 8054377 | 2,26 | 4,80 | 0,02976 | 2,62  | 6,15  | 0,00925 | NM_201555      | INPP5A   |
| 7931479 | 2,26 | 4,80 | 0,02407 | 2,49  | 5,63  | 0,00026 | NM_005539      | SSX2IP   |
| 7917255 | 2,26 | 4,79 | 0,01326 | 1,57  | 2,97  | 0,01915 | NM_014021      | SYT14    |
| 7909494 | 2,26 | 4,79 | 0,01624 | -1,24 | -2,36 | 0,01000 | NR_027458      | HSPA13   |
| 8069532 | 2,26 | 4,79 | 0,04336 | 3,65  | 12,57 | 0,00005 | NM_006948      | FLJ44606 |
| 8113796 | 2,26 | 4,79 | 0,00884 | 3,07  | 8,42  | 0,00659 | NM_001164478   | CTNNA1   |
| 8163063 | 2,26 | 4,78 | 0,00380 | 3,17  | 9,01  | 0,00026 | NM_003798      | LPIN1    |
| 8040340 | 2,26 | 4,78 | 0,00457 | 2,91  | 7,53  | 0,00010 | NM_145693      | PARP8    |
| 8105191 | 2,26 | 4,78 | 0,00037 | 2,45  | 5,46  | 0,00122 | NM_001178055   | DDX46    |

|         |      |      |         |       |       |         |              |          |
|---------|------|------|---------|-------|-------|---------|--------------|----------|
| 8108134 | 2,26 | 4,78 | 0,00126 | 2,43  | 5,37  | 0,00031 | NM_014829    | KCTD21   |
| 7950669 | 2,26 | 4,78 | 0,03755 | 1,39  | 2,62  | 0,02011 | NM_001029859 | ALG13    |
| 8169412 | 2,26 | 4,78 | 0,04203 | 2,48  | 5,59  | 0,01598 | NM_018466    | ATF6B    |
| 8125295 | 2,26 | 4,78 | 0,01950 | 3,28  | 9,71  | 0,00026 | NM_004381    | ACSS3    |
| 7957386 | 2,26 | 4,77 | 0,01489 | -0,87 | -1,82 | 0,04195 | NM_024560    | LRRC1    |
| 8120279 | 2,25 | 4,77 | 0,01887 | 2,29  | 4,90  | 0,01744 | NM_018214    | TMEM117  |
| 7954985 | 2,25 | 4,77 | 0,06038 | 3,40  | 10,54 | 0,00028 | NM_032256    | ALDH1B1  |
| 8155327 | 2,25 | 4,77 | 0,01032 | 1,54  | 2,91  | 0,02461 | NM_000692    | KGFLP1   |
| 8067839 | 2,25 | 4,76 | 0,00009 | -0,18 | -1,13 | 0,66070 | NR_003674    | PIGP     |
| 8070257 | 2,25 | 4,76 | 0,00734 | 2,01  | 4,02  | 0,00387 | NR_028352    | TMEM69   |
| 7901135 | 2,25 | 4,76 | 0,01395 | 1,70  | 3,25  | 0,02843 | NM_016486    | SMC3     |
| 7930422 | 2,25 | 4,76 | 0,00369 | 3,62  | 12,32 | 0,00199 | NM_005445    | ADAT1    |
| 8002904 | 2,25 | 4,76 | 0,01498 | 3,69  | 12,87 | 0,00001 | NM_012091    | SERPINA3 |
| 7976496 | 2,25 | 4,76 | 0,00230 | -0,77 | -1,70 | 0,05602 | NM_001085    | ANG      |
| 7973084 | 2,25 | 4,75 | 0,02196 | 0,96  | 1,94  | 0,01184 | NM_001145    | MRPS7    |
| 8009784 | 2,25 | 4,75 | 0,00485 | 2,81  | 7,01  | 0,00453 | NM_015971    | ARPP19   |
| 7988963 | 2,25 | 4,75 | 0,00775 | 2,26  | 4,80  | 0,02822 | NM_006628    | FLNA     |
| 8176026 | 2,25 | 4,74 | 0,01778 | 3,10  | 8,57  | 0,00824 | NM_001456    | CAMLG    |
| 8108127 | 2,25 | 4,74 | 0,01205 | 2,50  | 5,64  | 0,00033 | NM_001745    | AASDHPPT |
| 7943552 | 2,24 | 4,74 | 0,01329 | 2,22  | 4,65  | 0,01323 | NM_015423    | MYO10    |
| 8111153 | 2,24 | 4,74 | 0,00294 | 2,83  | 7,11  | 0,00000 | NM_012334    | DNAJC16  |
| 7898192 | 2,24 | 4,74 | 0,01590 | 2,86  | 7,28  | 0,00001 | NM_015291    | FAR1     |
| 7938592 | 2,24 | 4,73 | 0,00253 | 2,26  | 4,80  | 0,00115 | NM_032228    | STK16    |
| 8048505 | 2,24 | 4,73 | 0,05217 | 1,52  | 2,87  | 0,01165 | NR_026909    | MAN1A1   |
| 8129254 | 2,24 | 4,73 | 0,01343 | -0,45 | -1,36 | 0,17505 | NM_005907    | CHEK1    |
| 7945014 | 2,24 | 4,73 | 0,02442 | 3,45  | 10,96 | 0,00129 | NM_001274    | FAM49A   |
| 8050427 | 2,24 | 4,72 | 0,00650 | -0,75 | -1,68 | 0,02730 | NM_030797    | GAPDH    |
| 7953385 | 2,24 | 4,72 | 0,20242 | 1,14  | 2,20  | 0,00289 | NM_002046    | VTI1B    |
| 7979732 | 2,24 | 4,72 | 0,03092 | 3,59  | 12,03 | 0,00229 | NM_006370    | KIF20A   |
| 8108301 | 2,24 | 4,72 | 0,01028 | 3,54  | 11,64 | 0,00032 | NM_005733    | CCDC45   |
| 8009255 | 2,24 | 4,71 | 0,00430 | 2,73  | 6,61  | 0,02981 | NM_138363    | CDC5L    |
| 8120022 | 2,24 | 4,71 | 0,00151 | 2,07  | 4,20  | 0,02796 | NM_001253    | AAK1     |
| 8052803 | 2,24 | 4,71 | 0,00269 | 1,62  | 3,08  | 0,00364 | NM_014911    | MUT      |
| 8126860 | 2,24 | 4,71 | 0,00475 | 3,30  | 9,85  | 0,00092 | NM_000255    | ZNF595   |
| 8093320 | 2,24 | 4,71 | 0,00961 | 1,44  | 2,71  | 0,03352 | NM_182524    | ZEB2     |
| 8055624 | 2,23 | 4,71 | 0,00227 | -0,58 | -1,49 | 0,28959 | NM_014795    | BTN3A3   |
| 8117476 | 2,23 | 4,70 | 0,01495 | 1,42  | 2,67  | 0,07393 | NM_006994    | PION     |
| 8140468 | 2,23 | 4,70 | 0,06614 | 2,31  | 4,97  | 0,00831 | NM_017439    | STARD7   |
| 8053890 | 2,23 | 4,70 | 0,03061 | 3,48  | 11,12 | 0,00002 | NM_020151    | RRN3P1   |
| 8000192 | 2,23 | 4,70 | 0,01415 | 3,48  | 11,15 | 0,00041 | NR_003370    | DARS     |
| 8055445 | 2,23 | 4,70 | 0,02125 | 3,20  | 9,18  | 0,00184 | NM_001349    | ST5      |
| 7946401 | 2,23 | 4,70 | 0,03593 | 0,44  | 1,35  | 0,05056 | NM_005418    | CDKN1A   |
| 8119088 | 2,23 | 4,70 | 0,00071 | 1,37  | 2,59  | 0,01126 | NM_078467    | CYP4V2   |
| 8098637 | 2,23 | 4,70 | 0,00496 | 2,01  | 4,04  | 0,01984 | NM_207352    | SNRPN    |
| 7981919 | 2,23 | 4,70 | 0,02413 | 2,18  | 4,53  | 0,00292 | NM_022807    | RHOJ     |
| 7974902 | 2,23 | 4,70 | 0,02997 | -1,47 | -2,76 | 0,00008 | NM_020663    | CLCN3    |
| 8098291 | 2,23 | 4,69 | 0,00610 | 2,39  | 5,25  | 0,00001 | NM_173872    | LCLAT1   |
| 8041212 | 2,23 | 4,69 | 0,01880 | 3,32  | 9,99  | 0,00003 | NM_182551    | FKBP15   |
| 8163452 | 2,23 | 4,69 | 0,00971 | 3,01  | 8,07  | 0,00109 | NM_015258    | KIAA1586 |
| 8120378 | 2,23 | 4,69 | 0,04157 | 0,39  | 1,31  | 0,02644 | NM_020931    | CCNA1    |
| 7968637 | 2,23 | 4,69 | 0,01067 | 1,95  | 3,87  | 0,00017 | NM_003914    | ATXN1    |
| 8124040 | 2,23 | 4,69 | 0,00534 | 2,92  | 7,55  | 0,00104 | NM_000332    | UGGT2    |
| 7972369 | 2,23 | 4,69 | 0,01583 | 1,89  | 3,72  | 0,04046 | NM_020121    | MRPS15   |
| 7914940 | 2,23 | 4,69 | 0,03509 | 4,34  | 20,31 | 0,00048 | NM_031280    | C18orf8  |
| 8020527 | 2,23 | 4,69 | 0,00554 | 3,02  | 8,12  | 0,00002 | NM_013326    | GNPDA1   |
| 8114787 | 2,23 | 4,69 | 0,01117 | 1,14  | 2,20  | 0,02106 | NM_005471    | LASS6    |
| 8046086 | 2,23 | 4,68 | 0,00477 | 3,88  | 14,69 | 0,00090 | NM_203463    | STX2     |
| 7967685 | 2,23 | 4,68 | 0,00363 | 2,68  | 6,40  | 0,00352 | NM_194356    | RASSF3   |
| 7956819 | 2,23 | 4,68 | 0,02038 | 3,63  | 12,34 | 0,00002 | NM_178169    | GNE      |
| 8161174 | 2,23 | 4,68 | 0,01806 | 3,03  | 8,17  | 0,00178 | NM_005476    | RPL10    |
| 8109821 | 2,23 | 4,68 | 0,11236 | 4,46  | 21,93 | 0,00039 | NM_006013    | TNKS     |
| 8144528 | 2,23 | 4,68 | 0,08499 | 3,20  | 9,18  | 0,00014 | NM_003747    | LYPLA1   |
| 8150830 | 2,23 | 4,68 | 0,02365 | 5,21  | 36,91 | 0,00273 | NM_006330    | PHAX     |
| 8107691 | 2,22 | 4,67 | 0,03711 | 2,08  | 4,24  | 0,01111 | NM_032177    | DOCK10   |
| 8059413 | 2,22 | 4,67 | 0,00590 | 2,29  | 4,90  | 0,00219 | NM_014689    | KIAA1370 |
| 7988970 | 2,22 | 4,67 | 0,01884 | 1,58  | 2,98  | 0,01598 | NM_019600    | HSPA5    |
| 8164165 | 2,22 | 4,66 | 0,00384 | 2,51  | 5,71  | 0,00095 | NM_005347    | CLASP2   |
| 8086077 | 2,22 | 4,66 | 0,00779 | 3,30  | 9,84  | 0,00017 | NM_015097    | MFN1     |
| 8084045 | 2,22 | 4,66 | 0,01639 | 3,38  | 10,42 | 0,00275 | NM_033540    | PGM2L1   |
| 7950391 | 2,22 | 4,66 | 0,00960 | 1,50  | 2,82  | 0,02263 | NM_173582    | SH3PXD2B |
| 8115814 | 2,22 | 4,66 | 0,00421 | 2,02  | 4,05  | 0,00044 | NM_001017995 | CAPNS1   |
| 8028172 | 2,22 | 4,65 | 0,02870 | 3,51  | 11,42 | 0,00088 | NM_001749    | STS      |
| 8165866 | 2,22 | 4,65 | 0,01141 | 1,51  | 2,85  | 0,00182 | NM_000351    | RUFY3    |

|                      |        |      |         |       |       |         |                           |              |
|----------------------|--------|------|---------|-------|-------|---------|---------------------------|--------------|
| 8095545              | 2,22   | 4,65 | 0,00130 | 1,18  | 2,26  | 0,00100 | NM_001037442              | DHX40        |
| 8008825              | 2,22   | 4,65 | 0,01211 | 3,19  | 9,10  | 0,00207 | NM_024612                 | LZTFL1       |
| 8086555              | 2,22   | 4,65 | 0,02206 | 1,05  | 2,06  | 0,06709 | NM_020347                 | NDUFV3       |
| 8068857              | 2,22   | 4,64 | 0,01658 | 2,69  | 6,45  | 0,01510 | NM_021075                 | HHLA3        |
| 7902282              | 2,22   | 4,64 | 0,06220 | 3,23  | 9,41  | 0,00026 | NM_001036645              | ASPA         |
| 8003814              | 2,21   | 4,64 | 0,04934 | -0,92 | -1,89 | 0,03418 | NM_000049                 | FAT1         |
| 8104079              | 2,21   | 4,64 | 0,00929 | 1,25  | 2,38  | 0,00967 | NM_005245                 | DNAJC8       |
| 7899422              | 2,21   | 4,64 | 0,02593 | 0,56  | 1,47  | 0,47539 | NM_014280                 | PECI         |
| 8123695              | 2,21   | 4,64 | 0,01999 | 3,04  | 8,24  | 0,00077 | NR_028588                 | TTC35        |
| 8147864              | 2,21   | 4,64 | 0,00942 | 2,65  | 6,26  | 0,00000 | NM_014673                 | LSP1         |
| 7905028              | 2,21   | 4,64 | 0,07055 | 2,70  | 6,52  | 0,00103 | NM_002339                 | TRIM38       |
| 8117321              | 2,21   | 4,64 | 0,02883 | 2,38  | 5,20  | 0,00093 | NM_006355                 | PPP1R14B //  |
| PPP1R14B // PPP1R14B |        |      |         |       |       |         |                           |              |
| 7949060              | 2,21   | 4,63 | 0,01627 | 2,19  | 4,57  | 0,00089 | NM_138689 // NM_138689 // |              |
| NM_138689            | STARD4 |      |         |       |       |         |                           |              |
| 8113491              | 2,21   | 4,63 | 0,01352 | 1,71  | 3,28  | 0,00701 | NM_139164                 | RWDD4A       |
| 8139198              | 2,21   | 4,63 | 0,00119 | 2,07  | 4,19  | 0,00139 | NM_152682                 | NSUN3        |
| 8081128              | 2,21   | 4,63 | 0,01039 | 2,20  | 4,59  | 0,00085 | NM_022072                 | SESTD1       |
| 8057394              | 2,21   | 4,63 | 0,03036 | 1,90  | 3,73  | 0,00066 | NM_178123                 | C20orf24     |
| 8062326              | 2,21   | 4,63 | 0,01030 | 3,24  | 9,44  | 0,00739 | NR_026562                 | RC3H1        |
| 7922432              | 2,21   | 4,63 | 0,01075 | 2,69  | 6,46  | 0,00007 | NM_172071                 | FXYD5        |
| 8027778              | 2,21   | 4,63 | 0,02350 | 0,77  | 1,71  | 0,22754 | NR_028406                 | ZNF93        |
| 8027247              | 2,21   | 4,62 | 0,02459 | 1,72  | 3,29  | 0,02094 | NM_031218                 | TMEM189      |
| 8066964              | 2,21   | 4,62 | 0,01279 | 3,54  | 11,60 | 0,00020 | NM_199129                 | ZNF281       |
| 7923183              | 2,21   | 4,62 | 0,02535 | 1,94  | 3,83  | 0,00112 | NM_012482                 | NSMCE1       |
| 8000413              | 2,21   | 4,62 | 0,03165 | 1,40  | 2,64  | 0,00283 | NM_145080                 | AP1M1        |
| 8026548              | 2,21   | 4,62 | 0,01966 | 2,89  | 7,41  | 0,00167 | NM_001130524              | EIF2S2       |
| 8065730              | 2,21   | 4,62 | 0,00076 | 2,45  | 5,45  | 0,01033 | NM_003908                 | TP53BP2      |
| 7924526              | 2,21   | 4,62 | 0,00540 | 2,37  | 5,18  | 0,00595 | NM_005426                 | CLIC1        |
| 8179827              | 2,21   | 4,62 | 0,01304 | 2,73  | 6,62  | 0,00055 | NM_001288                 | WDR45        |
| 8172538              | 2,21   | 4,62 | 0,01295 | 2,25  | 4,75  | 0,04218 | NM_007075                 | C8orf84      |
| 8151369              | 2,21   | 4,61 | 0,04766 | -1,69 | -3,22 | 0,01678 | NM_153225                 | CALM2        |
| 8052010              | 2,21   | 4,61 | 0,00412 | 1,27  | 2,41  | 0,04838 | NM_001743                 | EIF5         |
| 7977058              | 2,20   | 4,61 | 0,03848 | 4,71  | 26,21 | 0,00048 | NM_001969                 | ZNF507       |
| 8027439              | 2,20   | 4,61 | 0,01127 | 2,74  | 6,66  | 0,00303 | NM_001136156              | MAP3K8       |
| 7926900              | 2,20   | 4,61 | 0,00790 | 0,57  | 1,49  | 0,36386 | NM_005204                 | PLA2R1       |
| 8056151              | 2,20   | 4,60 | 0,00913 | 0,43  | 1,35  | 0,13216 | NM_007366                 | NRP1         |
| 7932985              | 2,20   | 4,60 | 0,00030 | 1,85  | 3,60  | 0,00875 | NM_003873                 | YWHAG        |
| 8140398              | 2,20   | 4,60 | 0,00656 | 2,18  | 4,53  | 0,00814 | NM_012479                 | PHKB         |
| 7995382              | 2,20   | 4,60 | 0,01267 | 3,36  | 10,26 | 0,00414 | NM_001031835              | PTPN1        |
| 8063394              | 2,20   | 4,60 | 0,03466 | 2,10  | 4,29  | 0,00128 | NM_002827                 | SLC25A46     |
| 8107259              | 2,20   | 4,60 | 0,03463 | 1,85  | 3,60  | 0,01431 | NM_138773                 | ETFDH        |
| 8098084              | 2,20   | 4,60 | 0,03072 | 1,05  | 2,07  | 0,00250 | NM_004453                 | HARS         |
| 8114628              | 2,20   | 4,60 | 0,02747 | 2,87  | 7,33  | 0,00074 | NM_002109                 | SUV420H1     |
| 7949931              | 2,20   | 4,59 | 0,02153 | 2,31  | 4,97  | 0,00628 | NM_017635                 | ---          |
| 8092532              | 2,20   | 4,59 | 0,03473 | 1,65  | 3,13  | 0,05707 | ---                       | RIOK3        |
| 8020508              | 2,20   | 4,59 | 0,00531 | 1,96  | 3,89  | 0,00128 | NM_003831                 | RWDD1        |
| 8121613              | 2,20   | 4,58 | 0,00553 | 1,40  | 2,64  | 0,03459 | NM_016104                 | NTAN1        |
| 7999598              | 2,20   | 4,58 | 0,05045 | 1,40  | 2,64  | 0,00721 | NM_173474                 | GPR180       |
| 7969626              | 2,20   | 4,58 | 0,03809 | 2,63  | 6,17  | 0,00022 | NM_180989                 | RER1         |
| 7897078              | 2,20   | 4,58 | 0,00874 | 2,60  | 6,07  | 0,00009 | NM_007033                 | PDLIM5       |
| 8096489              | 2,20   | 4,58 | 0,00951 | 2,92  | 7,56  | 0,00001 | NM_006457                 | USP32        |
| 8017212              | 2,20   | 4,58 | 0,04745 | 3,19  | 9,16  | 0,00078 | NM_032582                 | ACAP2        |
| 8092933              | 2,19   | 4,58 | 0,00185 | 2,63  | 6,20  | 0,00557 | NM_012287                 | UBXN4        |
| 8045455              | 2,19   | 4,58 | 0,00205 | 2,82  | 7,05  | 0,00339 | NM_014607                 | TMEM222      |
| 7899310              | 2,19   | 4,58 | 0,04551 | 2,57  | 5,94  | 0,00021 | NM_032125                 | ZDHHC9       |
| 8175023              | 2,19   | 4,57 | 0,00839 | 4,46  | 22,02 | 0,00005 | NM_016032                 | LOC100132288 |
| 8071044              | 2,19   | 4,57 | 0,00851 | 2,49  | 5,62  | 0,00042 | NM_001033515              | POLR2H       |
| 8084488              | 2,19   | 4,57 | 0,02676 | 6,00  | 63,87 | 0,00003 | NM_006232                 | SGTA         |
| 8032530              | 2,19   | 4,57 | 0,00540 | 2,75  | 6,75  | 0,00494 | NM_003021                 | RNF19A       |
| 8152041              | 2,19   | 4,57 | 0,00519 | 3,37  | 10,36 | 0,00005 | NM_183419                 | ---          |
| 8136159              | 2,19   | 4,57 | 0,00220 | 0,65  | 1,56  | 0,25345 | ---                       | PKD1         |
| 7999614              | 2,19   | 4,56 | 0,01544 | 3,40  | 10,55 | 0,00008 | NM_001009944              | PPP1R2       |
| 8092959              | 2,19   | 4,56 | 0,00927 | 2,99  | 7,95  | 0,00316 | NM_006241                 | ACOX1        |
| 8018558              | 2,19   | 4,56 | 0,01331 | 2,92  | 7,56  | 0,00363 | NM_004035                 | FAM55C       |
| 8081375              | 2,19   | 4,56 | 0,02014 | 1,81  | 3,51  | 0,00224 | NM_145037                 | RABGEF1      |
| 8133176              | 2,19   | 4,56 | 0,07482 | 1,68  | 3,20  | 0,00339 | NM_014504                 | MED10        |
| 8110886              | 2,19   | 4,56 | 0,01053 | 3,69  | 12,94 | 0,00110 | NM_032286                 | NDUFA3       |
| 8031097              | 2,19   | 4,56 | 0,02856 | 1,25  | 2,37  | 0,01054 | NM_004542                 | PLN          |
| 8121729              | 2,19   | 4,56 | 0,00012 | -0,71 | -1,64 | 0,05360 | NM_002667                 | ENOX2        |
| 8175102              | 2,19   | 4,56 | 0,04317 | 3,10  | 8,57  | 0,00076 | NM_182314                 | PRDX5        |
| 7940996              | 2,19   | 4,56 | 0,02851 | 3,58  | 11,93 | 0,00003 | NM_012094                 | TUBA1C       |
| 7955179              | 2,19   | 4,56 | 0,03279 | 3,21  | 9,28  | 0,00248 | NM_032704                 | TBC1D23      |

|         |      |      |         |       |       |         |              |          |
|---------|------|------|---------|-------|-------|---------|--------------|----------|
| 8081256 | 2,19 | 4,55 | 0,01102 | 2,29  | 4,91  | 0,00223 | NM_018309    | KDM3A    |
| 8043283 | 2,19 | 4,55 | 0,01769 | 2,44  | 5,42  | 0,00040 | NM_018433    | FMO4     |
| 7907297 | 2,19 | 4,55 | 0,00705 | 1,74  | 3,35  | 0,00627 | NM_002022    | EXT2     |
| 7939524 | 2,19 | 4,55 | 0,02143 | 1,77  | 3,40  | 0,00576 | NM_000401    | SUPV3L1  |
| 7927981 | 2,19 | 4,55 | 0,00452 | 3,16  | 8,94  | 0,00035 | NM_003171    | POC1B    |
| 7965343 | 2,19 | 4,55 | 0,01597 | 2,92  | 7,58  | 0,00174 | NM_172240    | PPP1R11  |
| 8117834 | 2,18 | 4,55 | 0,02864 | 3,90  | 14,90 | 0,00068 | NM_021959    | PPP1R11  |
| 8177744 | 2,18 | 4,55 | 0,02864 | 3,90  | 14,90 | 0,00068 | NM_021959    | R3HDM2   |
| 7964413 | 2,18 | 4,55 | 0,01064 | 3,13  | 8,73  | 0,01089 | NM_014925    | DMXL1    |
| 8107474 | 2,18 | 4,55 | 0,00920 | 2,95  | 7,72  | 0,00153 | NM_005509    | ELOVL1   |
| 7915504 | 2,18 | 4,55 | 0,01600 | 2,56  | 5,88  | 0,00028 | NM_022821    | SF3B5    |
| 8130003 | 2,18 | 4,54 | 0,02490 | 2,50  | 5,64  | 0,00091 | NM_031287    | EAPP     |
| 7978558 | 2,18 | 4,54 | 0,02312 | 3,94  | 15,36 | 0,00163 | NM_018453    | PPP1R7   |
| 8049784 | 2,18 | 4,54 | 0,00054 | 1,89  | 3,72  | 0,00057 | NM_002712    | PPWD1    |
| 8105633 | 2,18 | 4,54 | 0,00660 | 1,92  | 3,78  | 0,00503 | NM_015342    | HSPD1    |
| 8058052 | 2,18 | 4,54 | 0,00112 | 1,76  | 3,40  | 0,09151 | NM_002156    | NEDD4    |
| 7989094 | 2,18 | 4,54 | 0,01992 | 4,45  | 21,87 | 0,00022 | NM_006154    | ZBTB39   |
| 7964300 | 2,18 | 4,54 | 0,00179 | 2,06  | 4,18  | 0,00423 | NM_014830    | DDX60L   |
| 8103601 | 2,18 | 4,53 | 0,03183 | 1,76  | 3,39  | 0,00833 | NM_001012967 | C2orf47  |
| 8047265 | 2,18 | 4,53 | 0,00315 | 2,13  | 4,38  | 0,00190 | NM_024520    | NR1H4    |
| 7957835 | 2,18 | 4,53 | 0,00547 | -0,67 | -1,59 | 0,03787 | NM_005123    | KIAA1737 |
| 7975926 | 2,18 | 4,53 | 0,00291 | 2,73  | 6,63  | 0,00809 | NM_033426    | PDLIM3   |
| 8104022 | 2,18 | 4,53 | 0,01383 | 0,00  | -1,00 | 0,97299 | NM_014476    | UTP6     |
| 8014081 | 2,18 | 4,53 | 0,00778 | 2,79  | 6,90  | 0,00033 | NM_018428    | PRPF4    |
| 8157283 | 2,18 | 4,53 | 0,01487 | 3,00  | 8,00  | 0,00173 | NM_004697    | CTSO     |
| 8103389 | 2,18 | 4,52 | 0,01944 | -0,38 | -1,30 | 0,22910 | NM_001334    | POLR2J3  |
| 8141795 | 2,18 | 4,52 | 0,00102 | 1,28  | 2,42  | 0,01841 | NM_001097615 | DPY19L4  |
| 8147375 | 2,18 | 4,52 | 0,02633 | 3,21  | 9,27  | 0,00475 | NM_181787    | ---      |
| 7908635 | 2,18 | 4,52 | 0,00197 | 1,42  | 2,68  | 0,10933 | ---          | MAT2B    |
| 8109732 | 2,18 | 4,52 | 0,00306 | 2,38  | 5,21  | 0,00313 | NM_013283    | MRPL16   |
| 7948424 | 2,17 | 4,51 | 0,00111 | 2,20  | 4,60  | 0,00994 | NM_017840    | RCOR1    |
| 7977003 | 2,17 | 4,51 | 0,02174 | 2,61  | 6,10  | 0,01239 | NM_015156    | SLC4A7   |
| 8085914 | 2,17 | 4,51 | 0,00565 | 2,32  | 4,98  | 0,00061 | NM_003615    | CYB5R1   |
| 7923516 | 2,17 | 4,51 | 0,03039 | 1,76  | 3,38  | 0,00699 | NM_016243    | SRP9     |
| 7910099 | 2,17 | 4,51 | 0,00093 | 1,29  | 2,44  | 0,00702 | NM_001130440 | SMC4     |
| 8083709 | 2,17 | 4,51 | 0,02008 | 1,52  | 2,87  | 0,09050 | NM_005496    | NFYB     |
| 7965956 | 2,17 | 4,51 | 0,00769 | 1,24  | 2,37  | 0,01119 | NM_006166    | RSRC1    |
| 8083605 | 2,17 | 4,51 | 0,02560 | 2,07  | 4,19  | 0,00286 | NM_016625    | TRA2A    |
| 8138581 | 2,17 | 4,50 | 0,02431 | 3,20  | 9,17  | 0,00306 | NM_013293    | OTUB1    |
| 7940840 | 2,17 | 4,50 | 0,07352 | 3,23  | 9,37  | 0,00059 | NM_017670    | FMNL2    |
| 8045736 | 2,17 | 4,50 | 0,01434 | 3,09  | 8,53  | 0,00063 | NM_052905    | RNF34    |
| 7959282 | 2,17 | 4,50 | 0,04246 | 3,76  | 13,53 | 0,00035 | NM_194271    | VPS24    |
| 8053562 | 2,17 | 4,50 | 0,00363 | 1,59  | 3,01  | 0,00123 | NM_016079    | PPPDE1   |
| 7911078 | 2,17 | 4,49 | 0,01886 | 1,96  | 3,88  | 0,00536 | NM_016076    | TCF7L2   |
| 7930537 | 2,17 | 4,49 | 0,01487 | 2,62  | 6,16  | 0,01274 | NM_001146274 | UBE4B    |
| 7897527 | 2,17 | 4,49 | 0,00377 | 2,40  | 5,28  | 0,00151 | NM_001105562 | HSPC159  |
| 8042283 | 2,17 | 4,49 | 0,05035 | 3,72  | 13,21 | 0,00000 | NM_014181    | PDHA1    |
| 8166335 | 2,17 | 4,49 | 0,01095 | 3,09  | 8,49  | 0,00012 | NM_000284    | SMARCD1  |
| 7955331 | 2,17 | 4,49 | 0,01347 | 3,74  | 13,32 | 0,00010 | NM_003076    | DERA     |
| 7954185 | 2,17 | 4,49 | 0,04265 | 1,56  | 2,95  | 0,00231 | NM_015954    | TLR4     |
| 8157524 | 2,16 | 4,48 | 0,00323 | -1,41 | -2,66 | 0,02286 | NR_024168    | TAPBP1   |
| 7953341 | 2,16 | 4,48 | 0,01714 | 2,34  | 5,07  | 0,01259 | NM_018009    | NOL11    |
| 8009366 | 2,16 | 4,48 | 0,01006 | 2,11  | 4,33  | 0,04363 | NM_015462    | MYL12A   |
| 8019924 | 2,16 | 4,48 | 0,00176 | 0,64  | 1,56  | 0,08715 | NM_006471    | FXC1     |
| 7938111 | 2,16 | 4,48 | 0,03191 | 2,44  | 5,43  | 0,00175 | NM_012192    | CLTA     |
| 8155203 | 2,16 | 4,48 | 0,00072 | 0,99  | 1,98  | 0,05843 | NM_007096    | C3orf55  |
| 8083599 | 2,16 | 4,47 | 0,00233 | 2,20  | 4,60  | 0,00028 | NM_001130002 | PARP14   |
| 8082100 | 2,16 | 4,47 | 0,00581 | 2,15  | 4,45  | 0,00879 | NM_017554    | TRIM13   |
| 7969153 | 2,16 | 4,47 | 0,01223 | 1,83  | 3,56  | 0,04351 | NM_213590    | ZDHHC16  |
| 7929634 | 2,16 | 4,47 | 0,04286 | 4,31  | 19,86 | 0,00003 | NM_198046    | TERF1    |
| 8102789 | 2,16 | 4,47 | 0,00724 | 1,21  | 2,31  | 0,04953 | NM_003218    | VRK3     |
| 8038515 | 2,16 | 4,47 | 0,03194 | 2,67  | 6,37  | 0,00034 | NM_016440    | TBC1D20  |
| 8064336 | 2,16 | 4,47 | 0,00090 | 3,59  | 12,01 | 0,00100 | NM_144628    | SLC9A7   |
| 8172280 | 2,16 | 4,46 | 0,00921 | 2,29  | 4,87  | 0,00022 | NM_032591    | ITCH     |
| 8061986 | 2,16 | 4,46 | 0,00230 | 2,02  | 4,06  | 0,01199 | NM_031483    | C12orf23 |
| 7958346 | 2,16 | 4,46 | 0,00244 | 1,53  | 2,89  | 0,02543 | NM_152261    | BTF3L4   |
| 8069561 | 2,16 | 4,46 | 0,02651 | 3,83  | 14,24 | 0,00001 | NM_152265    | BTBD1    |
| 7991057 | 2,16 | 4,46 | 0,01540 | 3,75  | 13,46 | 0,00049 | NM_025238    | GPBP1L1  |
| 7915758 | 2,16 | 4,46 | 0,00245 | 2,61  | 6,11  | 0,00097 | NM_021639    | IGF2BP2  |
| 8092552 | 2,16 | 4,45 | 0,05311 | 2,51  | 5,71  | 0,00017 | NM_006548    | RRAGC    |
| 7915160 | 2,15 | 4,45 | 0,03478 | 3,44  | 10,84 | 0,00000 | NM_022157    | RPP30    |
| 7929116 | 2,15 | 4,45 | 0,01060 | 2,97  | 7,84  | 0,00034 | NM_006413    | SNORA50  |
| 8001748 | 2,15 | 4,45 | 0,04057 | 2,21  | 4,64  | 0,13224 | NR_002980    | EXOC2    |



|         |      |      |         |       |       |         |              |             |
|---------|------|------|---------|-------|-------|---------|--------------|-------------|
| 8123524 | 2,15 | 4,45 | 0,00075 | 2,51  | 5,70  | 0,00423 | NM_018303    | RAN         |
| 7959882 | 2,15 | 4,45 | 0,00813 | 2,24  | 4,72  | 0,01869 | NM_006325    | SLC44A1     |
| 8157038 | 2,15 | 4,45 | 0,01226 | 3,35  | 10,17 | 0,00013 | NM_080546    | SURF1       |
| 8164896 | 2,15 | 4,45 | 0,00711 | 1,72  | 3,29  | 0,01527 | NM_003172    | SERINC5     |
| 8112865 | 2,15 | 4,45 | 0,04533 | 2,68  | 6,43  | 0,00002 | NM_178276    | PSMD6       |
| 8088535 | 2,15 | 4,44 | 0,00422 | 0,84  | 1,79  | 0,05309 | NM_014814    | PRR16       |
| 8107563 | 2,15 | 4,44 | 0,00843 | -0,32 | -1,24 | 0,37357 | NM_016644    | MEF2C       |
| 8113039 | 2,15 | 4,44 | 0,04844 | 0,44  | 1,35  | 0,26141 | NM_002397    | DHRS7       |
| 7979473 | 2,15 | 4,44 | 0,02271 | 3,12  | 8,72  | 0,00021 | NM_016029    | SPON1       |
| 7938608 | 2,15 | 4,44 | 0,04275 | -1,05 | -2,06 | 0,10165 | NM_006108    | TNKS2       |
| 7929168 | 2,15 | 4,44 | 0,00165 | 2,92  | 7,58  | 0,00315 | NM_025235    | TTL         |
| 8044462 | 2,15 | 4,43 | 0,00673 | 2,50  | 5,67  | 0,00001 | NM_153712    | COX10       |
| 8005089 | 2,15 | 4,43 | 0,00992 | 1,95  | 3,87  | 0,00270 | NM_001303    | SNORD116-23 |
| 7981994 | 2,15 | 4,43 | 0,05979 | -1,90 | -3,73 | 0,25395 | NR_003337    | IPP         |
| 7915775 | 2,15 | 4,43 | 0,01494 | 1,75  | 3,36  | 0,00366 | NM_005897    | JUN         |
| 7916609 | 2,15 | 4,43 | 0,00335 | 1,73  | 3,32  | 0,00773 | NM_002228    | GNAI3       |
| 7903703 | 2,15 | 4,43 | 0,01392 | 1,76  | 3,40  | 0,00292 | NM_006496    | ZNF260      |
| 8036324 | 2,15 | 4,42 | 0,00936 | 3,45  | 10,92 | 0,00075 | NM_001012756 | ARNTL       |
| 7938563 | 2,15 | 4,42 | 0,00915 | 3,07  | 8,41  | 0,00011 | NM_001178    | ZNF362      |
| 7899870 | 2,15 | 4,42 | 0,00289 | 3,05  | 8,31  | 0,00222 | NM_152493    | CTNND1      |
| 7940079 | 2,15 | 4,42 | 0,02428 | 2,68  | 6,40  | 0,00038 | NM_001085458 | FKBP14      |
| 8138834 | 2,14 | 4,42 | 0,06100 | 3,34  | 10,11 | 0,00022 | NM_017946    | ARIH2       |
| 8079662 | 2,14 | 4,42 | 0,02736 | 3,57  | 11,90 | 0,00023 | NM_006321    | ---         |
| 7964832 | 2,14 | 4,42 | 0,01431 | 1,49  | 2,82  | 0,02669 | ---          | RAB22A      |
| 8063607 | 2,14 | 4,42 | 0,01062 | 2,38  | 5,19  | 0,00002 | NM_020673    | RAB28       |
| 8099395 | 2,14 | 4,42 | 0,07211 | 3,74  | 13,37 | 0,00098 | NM_004249    | BAMBI       |
| 7926875 | 2,14 | 4,42 | 0,00938 | 0,11  | 1,08  | 0,72838 | NM_012342    | PARP1       |
| 7924733 | 2,14 | 4,42 | 0,04187 | 3,70  | 13,00 | 0,00005 | NM_001618    | PRPF18      |
| 7926283 | 2,14 | 4,41 | 0,02380 | 1,66  | 3,16  | 0,01934 | NM_003675    | SNORA73A    |
| 7899480 | 2,14 | 4,41 | 0,08351 | -0,70 | -1,63 | 0,58484 | NR_002907    | SHQ1        |
| 8088830 | 2,14 | 4,41 | 0,00199 | 1,96  | 3,89  | 0,04539 | NM_018130    | SETD8       |
| 8053733 | 2,14 | 4,41 | 0,07170 | 3,54  | 11,67 | 0,00051 | NM_020382    | RPL23AP82   |
| 8074157 | 2,14 | 4,41 | 0,00533 | 1,08  | 2,11  | 0,05200 | NR_026982    | ABI1        |
| 7932616 | 2,14 | 4,41 | 0,00936 | 2,27  | 4,81  | 0,00367 | NM_005470    | RBM5        |
| 8079869 | 2,14 | 4,40 | 0,02225 | 1,41  | 2,66  | 0,02858 | NM_005778    | C17orf49    |
| 8004247 | 2,14 | 4,40 | 0,05020 | 4,63  | 24,69 | 0,00030 | NM_001142798 | SORT1       |
| 7918323 | 2,14 | 4,40 | 0,01461 | 3,42  | 10,73 | 0,00004 | NM_002959    | VPS53       |
| 8010924 | 2,14 | 4,40 | 0,03065 | 2,81  | 7,00  | 0,00087 | NM_001128159 | ST3GAL1     |
| 8153021 | 2,14 | 4,40 | 0,05462 | 0,54  | 1,45  | 0,13383 | NM_003033    | MPDU1       |
| 8004521 | 2,14 | 4,40 | 0,00160 | 2,50  | 5,66  | 0,03915 | NM_004870    | NEK6        |
| 8157761 | 2,14 | 4,39 | 0,00843 | 2,76  | 6,77  | 0,00013 | NM_001145001 | ZNF468      |
| 8038998 | 2,14 | 4,39 | 0,00018 | 3,07  | 8,42  | 0,00050 | NM_199132    | MLL         |
| 7944223 | 2,14 | 4,39 | 0,01641 | 2,43  | 5,40  | 0,00034 | NM_005933    | E2F5        |
| 8147101 | 2,13 | 4,39 | 0,04926 | 4,32  | 19,92 | 0,00012 | NM_001951    | CLTB        |
| 8115918 | 2,13 | 4,39 | 0,01549 | 1,63  | 3,09  | 0,00148 | NM_007097    | IRAK4       |
| 7954969 | 2,13 | 4,39 | 0,01102 | 2,34  | 5,07  | 0,00152 | NM_001114182 | FIP1L1      |
| 8095048 | 2,13 | 4,38 | 0,01756 | 2,72  | 6,60  | 0,00116 | NM_030917    | PPP4R1      |
| 8022251 | 2,13 | 4,38 | 0,03228 | 4,56  | 23,57 | 0,00001 | NM_001042388 | OGN         |
| 8162373 | 2,13 | 4,38 | 0,00266 | -1,04 | -2,06 | 0,00417 | NM_033014    | TMEM45A     |
| 8081288 | 2,13 | 4,38 | 0,08051 | 0,41  | 1,33  | 0,18815 | NM_018004    | SERBP1      |
| 7916836 | 2,13 | 4,37 | 0,08733 | 3,08  | 8,46  | 0,00163 | NM_001018067 | LDLR        |
| 8025828 | 2,13 | 4,37 | 0,00255 | 3,42  | 10,71 | 0,00033 | NM_000527    | CEBPD       |
| 8150592 | 2,13 | 4,37 | 0,00378 | 1,95  | 3,87  | 0,01446 | NM_005195    | MTRR        |
| 8104422 | 2,13 | 4,37 | 0,02221 | 4,67  | 25,49 | 0,00047 | NM_002454    | NDUFS2      |
| 7906703 | 2,13 | 4,37 | 0,02300 | 3,80  | 13,97 | 0,00137 | NM_004550    | C9orf41     |
| 8161829 | 2,13 | 4,37 | 0,00225 | 2,11  | 4,33  | 0,00259 | BC034033     | PLSCR1      |
| 8091327 | 2,13 | 4,37 | 0,00805 | 1,24  | 2,36  | 0,03018 | NM_021105    | RPL17       |
| 7903582 | 2,12 | 4,36 | 0,00283 | 1,28  | 2,42  | 0,00353 | NM_001035006 | ADM         |
| 7938390 | 2,12 | 4,36 | 0,03550 | 0,88  | 1,84  | 0,25951 | NM_001124    | MTUS1       |
| 8149500 | 2,12 | 4,36 | 0,00081 | 2,02  | 4,05  | 0,01077 | NM_001001924 | INTS3       |
| 7905631 | 2,12 | 4,36 | 0,00243 | 3,84  | 14,33 | 0,00015 | NM_023015    | DBI         |
| 8044804 | 2,12 | 4,36 | 0,00909 | 1,85  | 3,61  | 0,05319 | NM_020548    | TH1L        |
| 8063697 | 2,12 | 4,35 | 0,01106 | 3,79  | 13,85 | 0,00002 | NM_198976    | MAP2K4      |
| 8005029 | 2,12 | 4,35 | 0,02198 | 2,71  | 6,52  | 0,00054 | NM_003010    | SNORD57     |
| 8060503 | 2,12 | 4,35 | 0,06958 | -2,69 | -6,45 | 0,20697 | NR_002738    | TPCN1       |
| 7958960 | 2,12 | 4,35 | 0,00459 | 4,09  | 16,99 | 0,00001 | NM_001143819 | RIOK2       |
| 8113286 | 2,12 | 4,35 | 0,02215 | 2,00  | 4,01  | 0,00116 | NM_018343    | SFRS6       |
| 8062695 | 2,12 | 4,35 | 0,02227 | 2,54  | 5,81  | 0,03864 | NM_006275    | PCOTH       |
| 7968029 | 2,12 | 4,35 | 0,01303 | -0,68 | -1,61 | 0,00268 | NM_001014442 | PIGS        |
| 8013641 | 2,12 | 4,34 | 0,01824 | 3,87  | 14,67 | 0,00007 | NM_033198    | GABPB1      |
| 7988687 | 2,12 | 4,34 | 0,01395 | 3,02  | 8,10  | 0,00000 | NM_005254    | TRIM37      |
| 8017106 | 2,12 | 4,34 | 0,01997 | 3,95  | 15,51 | 0,00796 | NM_015294    | FAM96B      |
| 8001924 | 2,12 | 4,34 | 0,00649 | 3,36  | 10,24 | 0,00169 | NR_024525    | RCAN1       |

|         |      |      |         |       |       |         |                 |           |
|---------|------|------|---------|-------|-------|---------|-----------------|-----------|
| 8070182 | 2,12 | 4,34 | 0,00145 | 0,36  | 1,28  | 0,21624 | NM_004414       | TMEM56    |
| 7903162 | 2,12 | 4,33 | 0,02788 | 2,69  | 6,47  | 0,00061 | NM_152487       | C16orf80  |
| 8001658 | 2,12 | 4,33 | 0,02531 | 4,97  | 31,32 | 0,00008 | NM_013242       | TYMS      |
| 8019842 | 2,12 | 4,33 | 0,00346 | 3,86  | 14,49 | 0,00008 | NM_001071       | SPG11     |
| 7988286 | 2,11 | 4,33 | 0,00468 | 2,46  | 5,52  | 0,00475 | NM_025137       | DOPEY1    |
| 8120883 | 2,11 | 4,32 | 0,00078 | 0,92  | 1,89  | 0,04096 | NM_015018       | ---       |
| 8094874 | 2,11 | 4,32 | 0,00740 | 1,45  | 2,73  | 0,06813 | ---             | ZNF473    |
| 8030569 | 2,11 | 4,32 | 0,00709 | 2,42  | 5,36  | 0,00029 | NM_015428       | CLIC1     |
| 8178598 | 2,11 | 4,32 | 0,02233 | 2,47  | 5,53  | 0,00134 | NM_001288       | HRSP12    |
| 8151942 | 2,11 | 4,32 | 0,02714 | 2,83  | 7,13  | 0,00079 | NM_005836       | HSP90AB3P |
| 8096296 | 2,11 | 4,32 | 0,04885 | 3,04  | 8,25  | 0,01167 | AY956764        | EIF3J     |
| 7983350 | 2,11 | 4,32 | 0,00637 | 3,00  | 7,97  | 0,00637 | NM_003758       | BLZF1     |
| 7907171 | 2,11 | 4,32 | 0,05751 | 1,98  | 3,93  | 0,02274 | NM_003666       | RPP40     |
| 8123717 | 2,11 | 4,32 | 0,03672 | 2,27  | 4,82  | 0,00412 | NM_006638       | OGFOD1    |
| 7995755 | 2,11 | 4,31 | 0,02054 | 2,67  | 6,38  | 0,00026 | NM_018233       | GUSBP3    |
| 8112560 | 2,11 | 4,31 | 0,12997 | 1,55  | 2,93  | 0,02161 | NR_027386       | PEX19     |
| 7921571 | 2,11 | 4,31 | 0,01293 | 2,54  | 5,80  | 0,00005 | NM_002857       | NPIPL3    |
| 8000636 | 2,11 | 4,31 | 0,07239 | 3,43  | 10,81 | 0,00844 | ENST00000446615 | C19orf50  |
| 8027018 | 2,11 | 4,31 | 0,04544 | 2,62  | 6,13  | 0,00079 | NM_001171948    | ATL3      |
| 7948997 | 2,11 | 4,31 | 0,02400 | 3,10  | 8,56  | 0,00001 | NM_015459       | RBM18     |
| 8163948 | 2,11 | 4,31 | 0,03110 | 2,76  | 6,79  | 0,00041 | NM_033117       | USP16     |
| 8068062 | 2,11 | 4,30 | 0,02775 | 2,96  | 7,80  | 0,00393 | NM_006447       | GRLF1     |
| 8029856 | 2,11 | 4,30 | 0,00543 | 3,18  | 9,07  | 0,00716 | NM_004491       | MAP3K2    |
| 8054997 | 2,11 | 4,30 | 0,00350 | 1,29  | 2,45  | 0,12464 | NM_006609       | OTUD4     |
| 8103011 | 2,11 | 4,30 | 0,00718 | 2,26  | 4,80  | 0,03690 | NM_199324       | SMC5      |
| 8155770 | 2,11 | 4,30 | 0,02366 | 3,45  | 10,92 | 0,00032 | NM_015110       | LYRM1     |
| 7993800 | 2,11 | 4,30 | 0,02236 | 2,84  | 7,18  | 0,00308 | NM_001128301    | TUBB      |
| 8117995 | 2,10 | 4,30 | 0,06166 | 3,97  | 15,63 | 0,00120 | NM_178014       | TUBB      |
| 8177858 | 2,10 | 4,30 | 0,06166 | 3,97  | 15,63 | 0,00120 | NM_178014       | TUBB      |
| 8179174 | 2,10 | 4,30 | 0,06166 | 3,97  | 15,63 | 0,00120 | NM_178014       | SESN1     |
| 8128698 | 2,10 | 4,30 | 0,03187 | 0,23  | 1,17  | 0,50702 | NM_014454       | RNF160    |
| 8069711 | 2,10 | 4,30 | 0,02784 | 2,92  | 7,58  | 0,00241 | NM_015565       | NMT1      |
| 8007715 | 2,10 | 4,30 | 0,00502 | 2,84  | 7,15  | 0,00019 | NM_021079       | C6orf153  |
| 8119661 | 2,10 | 4,30 | 0,00520 | 2,00  | 4,01  | 0,01105 | NM_033112       | APOL6     |
| 8072710 | 2,10 | 4,30 | 0,03186 | 0,69  | 1,61  | 0,03667 | NM_030641       | IFNGR2    |
| 8068280 | 2,10 | 4,29 | 0,01385 | 2,66  | 6,30  | 0,00091 | NM_005534       | YARS      |
| 7914563 | 2,10 | 4,29 | 0,00814 | 3,81  | 13,98 | 0,00044 | NM_003680       | LSM14A    |
| 8027592 | 2,10 | 4,29 | 0,00409 | 2,77  | 6,80  | 0,00000 | NM_001114093    | DEXI      |
| 7982185 | 2,10 | 4,29 | 0,04681 | 3,75  | 13,49 | 0,00030 | NM_014015       | DEXI      |
| 7986685 | 2,10 | 4,29 | 0,04681 | 3,75  | 13,49 | 0,00030 | NM_014015       | SEMA3D    |
| 8140686 | 2,10 | 4,29 | 0,00158 | -0,99 | -1,99 | 0,03649 | NM_152754       | MATR3     |
| 8108403 | 2,10 | 4,29 | 0,04269 | 2,27  | 4,83  | 0,03164 | NM_199189       | RPS26     |
| 7972577 | 2,10 | 4,28 | 0,00331 | 0,87  | 1,83  | 0,07894 | NM_001029       | PRUNE     |
| 7905299 | 2,10 | 4,28 | 0,02689 | 3,89  | 14,79 | 0,00159 | NM_021222       | TLE4      |
| 8156060 | 2,10 | 4,28 | 0,02130 | 2,36  | 5,15  | 0,00014 | NM_007005       | WDR48     |
| 8078834 | 2,10 | 4,28 | 0,01351 | 2,16  | 4,46  | 0,00789 | NM_020839       | MYCBP     |
| 7915170 | 2,10 | 4,28 | 0,04786 | 1,08  | 2,11  | 0,05016 | NM_012333       | COPZ1     |
| 7955896 | 2,10 | 4,27 | 0,01746 | 3,65  | 12,55 | 0,00048 | NM_016057       | GOSR2     |
| 8007904 | 2,10 | 4,27 | 0,05234 | 1,99  | 3,97  | 0,00342 | NM_004287       | AMMECR1L  |
| 8055096 | 2,10 | 4,27 | 0,00625 | 3,88  | 14,69 | 0,00006 | NM_031445       | IFT57     |
| 8089314 | 2,09 | 4,27 | 0,02483 | 1,13  | 2,18  | 0,00958 | NM_018010       | PRKAR2A   |
| 8087210 | 2,09 | 4,27 | 0,02630 | 2,55  | 5,84  | 0,00045 | NM_004157       | DCAF16    |
| 8099570 | 2,09 | 4,27 | 0,01582 | 3,65  | 12,51 | 0,00157 | NM_017741       | ISG20L2   |
| 7921110 | 2,09 | 4,27 | 0,01577 | 3,67  | 12,72 | 0,00000 | NM_030980       | DBT       |
| 7918008 | 2,09 | 4,27 | 0,02362 | 2,43  | 5,37  | 0,00328 | NM_001918       | BSG       |
| 8023955 | 2,09 | 4,27 | 0,00113 | 2,20  | 4,60  | 0,00842 | NM_001728       | STX7      |
| 8129590 | 2,09 | 4,26 | 0,00188 | 1,73  | 3,32  | 0,00261 | NM_003569       | PPIA      |
| 8067978 | 2,09 | 4,25 | 0,21338 | 1,97  | 3,92  | 0,00086 | NM_021130       | ARHGAP17  |
| 8000375 | 2,09 | 4,25 | 0,01696 | 2,43  | 5,40  | 0,00073 | NM_001006634    | IWS1      |
| 8055021 | 2,09 | 4,25 | 0,00195 | 2,39  | 5,22  | 0,00296 | NM_017969       | HMGXB4    |
| 8072645 | 2,09 | 4,25 | 0,00065 | 2,33  | 5,02  | 0,00113 | NR_027780       | CDC42SE2  |
| 8107868 | 2,09 | 4,24 | 0,04032 | 3,93  | 15,24 | 0,00108 | NM_020240       | GUSBP3    |
| 8105991 | 2,08 | 4,24 | 0,12382 | 1,48  | 2,80  | 0,02889 | NR_027386       | USP40     |
| 8059801 | 2,08 | 4,24 | 0,00301 | 1,77  | 3,40  | 0,00014 | NM_018218       | ARHGEF7   |
| 7970111 | 2,08 | 4,24 | 0,00355 | 0,61  | 1,52  | 0,23704 | NM_003899       | NIPSNAP3A |
| 8157021 | 2,08 | 4,23 | 0,02554 | 3,20  | 9,21  | 0,00069 | NM_015469       | ZNHIT6    |
| 7917359 | 2,08 | 4,23 | 0,00520 | 1,35  | 2,55  | 0,10645 | NM_017953       | KCNT2     |
| 7923043 | 2,08 | 4,23 | 0,06191 | 0,26  | 1,20  | 0,53496 | NM_198503       | IFT52     |
| 8062748 | 2,08 | 4,23 | 0,00147 | 1,77  | 3,40  | 0,00032 | NM_016004       | AP2M1     |
| 8084345 | 2,08 | 4,23 | 0,03429 | 1,70  | 3,24  | 0,00029 | NM_004068       | ZBTB8OS   |
| 7914550 | 2,08 | 4,23 | 0,02532 | 1,96  | 3,90  | 0,00676 | NM_178547       | LRCH1     |
| 7968976 | 2,08 | 4,22 | 0,00974 | 1,82  | 3,53  | 0,02145 | NM_001164211    | TMOD3     |
| 7983744 | 2,08 | 4,22 | 0,00122 | 2,69  | 6,45  | 0,00193 | NM_014547       | RFWD3     |

|         |      |      |         |       |       |         |                  |            |
|---------|------|------|---------|-------|-------|---------|------------------|------------|
| 8002762 | 2,08 | 4,22 | 0,03145 | 3,96  | 15,53 | 0,00001 | NM_018124        | ADSS       |
| 7925550 | 2,08 | 4,22 | 0,00485 | 2,33  | 5,03  | 0,00178 | NM_001126        | C7orf28A   |
| 8138128 | 2,08 | 4,22 | 0,05616 | 3,12  | 8,67  | 0,00079 | NM_015622        | EMD        |
| 8170850 | 2,08 | 4,22 | 0,01676 | 4,11  | 17,26 | 0,00074 | NM_000117        | OClAD2     |
| 8100298 | 2,08 | 4,22 | 0,00368 | 1,27  | 2,41  | 0,02835 | NM_001014446     | CBX1       |
| 8016402 | 2,08 | 4,22 | 0,00795 | 1,37  | 2,58  | 0,00555 | NM_001127228     | SSH2       |
| 8013965 | 2,07 | 4,21 | 0,00121 | 2,03  | 4,09  | 0,00271 | NM_033389        | CHMP5      |
| 8154785 | 2,07 | 4,21 | 0,03359 | 3,33  | 10,08 | 0,00330 | NM_016410        | KDELC1     |
| 7972682 | 2,07 | 4,21 | 0,02781 | 2,77  | 6,80  | 0,00164 | NM_024089        | LGALS8     |
| 7910706 | 2,07 | 4,21 | 0,01781 | 2,09  | 4,26  | 0,00159 | NM_006499        | IPPK       |
| 8162421 | 2,07 | 4,21 | 0,02797 | 3,26  | 9,56  | 0,00536 | NM_022755        | AP3D1      |
| 8032418 | 2,07 | 4,21 | 0,02511 | 3,11  | 8,61  | 0,00245 | NM_003938        | ASXL2      |
| 8050875 | 2,07 | 4,20 | 0,03257 | 2,98  | 7,90  | 0,03147 | NM_018263        | NHEJ1      |
| 8059071 | 2,07 | 4,20 | 0,01110 | 2,20  | 4,59  | 0,00669 | NM_024782        | SIPA1L1    |
| 7975459 | 2,07 | 4,20 | 0,05872 | 4,18  | 18,10 | 0,00200 | NM_015556        | INTS4      |
| 7950628 | 2,07 | 4,20 | 0,00977 | 2,91  | 7,52  | 0,00318 | NM_033547        | ACIN1      |
| 7977906 | 2,07 | 4,20 | 0,00178 | 2,45  | 5,46  | 0,00007 | NM_014977        | ATF6B      |
| 8178727 | 2,07 | 4,20 | 0,03258 | 3,11  | 8,64  | 0,00021 | NM_004381        | PPP1CB     |
| 8041122 | 2,07 | 4,20 | 0,00805 | 2,70  | 6,48  | 0,00120 | NM_002709        | HSBP1      |
| 7997520 | 2,07 | 4,20 | 0,00880 | 1,51  | 2,85  | 0,00538 | NM_001537        | SGMS1      |
| 7933619 | 2,07 | 4,20 | 0,01467 | 2,05  | 4,15  | 0,00454 | NM_147156        | SUCLG2     |
| 8088664 | 2,07 | 4,20 | 0,00747 | 1,41  | 2,65  | 0,00855 | NM_003848        | SNAP29     |
| 8071426 | 2,07 | 4,20 | 0,00209 | 3,35  | 10,20 | 0,00006 | NM_004782        | PIP4K2A    |
| 7932530 | 2,07 | 4,19 | 0,02220 | 2,34  | 5,06  | 0,00116 | NM_005028        | PTRH2      |
| 8017143 | 2,07 | 4,19 | 0,00151 | 3,25  | 9,54  | 0,00068 | NM_016077        | GLE1       |
| 8158298 | 2,07 | 4,19 | 0,00361 | 2,72  | 6,58  | 0,00006 | NM_001003722     | EXOC6      |
| 7929288 | 2,07 | 4,19 | 0,01703 | 2,34  | 5,07  | 0,01955 | NM_019053        | TMEM217    |
| 8126086 | 2,07 | 4,19 | 0,00322 | 0,21  | 1,16  | 0,37388 | NM_145316        | EXOSC9     |
| 8097128 | 2,07 | 4,19 | 0,02222 | 3,29  | 9,81  | 0,00232 | NM_001034194     | TOM1L1     |
| 8008547 | 2,07 | 4,19 | 0,00954 | 4,46  | 22,05 | 0,00005 | NM_005486        | THADA      |
| 8051820 | 2,07 | 4,19 | 0,00258 | 2,50  | 5,67  | 0,00074 | NM_022065        | ZNF451     |
| 8120382 | 2,07 | 4,19 | 0,01121 | 2,68  | 6,42  | 0,01109 | NM_001031623     | FNTB       |
| 7975121 | 2,07 | 4,19 | 0,02782 | 3,13  | 8,77  | 0,00061 | NM_002028        | C8orf76    |
| 8152648 | 2,07 | 4,18 | 0,00151 | 2,14  | 4,40  | 0,01603 | BC067796 TOP2A   |            |
| 8014974 | 2,06 | 4,18 | 0,00172 | 2,16  | 4,46  | 0,11466 | NM_001067        | ZNF512     |
| 8040985 | 2,06 | 4,18 | 0,00418 | 2,67  | 6,36  | 0,00123 | NM_032434        | NME4       |
| 7991837 | 2,06 | 4,17 | 0,01409 | 2,63  | 6,19  | 0,00223 | NM_005009        | TTC9C      |
| 7940679 | 2,06 | 4,17 | 0,03977 | 2,92  | 7,58  | 0,00029 | NM_173810        | C17orf39   |
| 8005305 | 2,06 | 4,17 | 0,00537 | 1,52  | 2,87  | 0,00366 | NM_024052        | UBE2F      |
| 8049574 | 2,06 | 4,17 | 0,03135 | 2,15  | 4,43  | 0,00217 | NM_080678        | ANAPCS     |
| 7967149 | 2,06 | 4,17 | 0,00596 | 3,66  | 12,67 | 0,00017 | NM_016237        | SLC7A2     |
| 8144786 | 2,06 | 4,17 | 0,00391 | 3,36  | 10,24 | 0,00154 | NM_003046        | NPLOC4     |
| 8019211 | 2,06 | 4,17 | 0,00185 | 3,48  | 11,17 | 0,00050 | NM_017921        | C2orf49    |
| 8044127 | 2,06 | 4,17 | 0,05292 | 3,53  | 11,54 | 0,00072 | NM_024093        | DHX32      |
| 7936949 | 2,06 | 4,16 | 0,00393 | 2,77  | 6,80  | 0,00000 | NM_018180        | GEM        |
| 8151816 | 2,06 | 4,16 | 0,02777 | 1,03  | 2,04  | 0,03357 | NM_005261        | NKRF       |
| 8174684 | 2,06 | 4,16 | 0,00742 | 2,11  | 4,33  | 0,01491 | NM_001173487     | CDH10      |
| 8111255 | 2,06 | 4,16 | 0,00364 | -0,80 | -1,74 | 0,02774 | NM_006727        | TMEM110    |
| 8088054 | 2,06 | 4,16 | 0,01194 | 1,45  | 2,73  | 0,00101 | NM_198563        | VEZF1      |
| 8016891 | 2,06 | 4,16 | 0,01253 | 2,73  | 6,64  | 0,00769 | NM_007146        | METTL3     |
| 7977749 | 2,06 | 4,16 | 0,05305 | 4,17  | 17,97 | 0,00030 | NM_019852        | RBL2       |
| 7995631 | 2,05 | 4,15 | 0,00938 | 2,94  | 7,66  | 0,00047 | NM_005611        | TNFAlP3    |
| 8122265 | 2,05 | 4,15 | 0,01753 | 2,11  | 4,32  | 0,00494 | NM_006290        | THRA       |
| 8007008 | 2,05 | 4,15 | 0,00702 | 1,89  | 3,70  | 0,00469 | NM_003250        | PPP2R2D    |
| 7931405 | 2,05 | 4,15 | 0,01648 | 3,37  | 10,33 | 0,00042 | NM_018461        | CIZ1       |
| 8164373 | 2,05 | 4,15 | 0,01774 | 2,88  | 7,37  | 0,00699 | NM_012127        | RSL24D1    |
| 7989013 | 2,05 | 4,15 | 0,01090 | 3,20  | 9,20  | 0,00014 | NM_016304        | ITGB3      |
| 8007931 | 2,05 | 4,15 | 0,03517 | 0,95  | 1,93  | 0,00823 | NM_000212        | GALNT11    |
| 8137448 | 2,05 | 4,15 | 0,00291 | 2,13  | 4,37  | 0,00141 | NM_022087        | PCMTD2     |
| 8064302 | 2,05 | 4,15 | 0,01436 | 3,61  | 12,25 | 0,00078 | NM_018257        | SUGT1      |
| 7969271 | 2,05 | 4,14 | 0,07098 | 2,49  | 5,62  | 0,00017 | NM_001130912     | SAMD8      |
| 7928516 | 2,05 | 4,14 | 0,00828 | 1,80  | 3,47  | 0,00279 | NM_144660        | NCRNA00188 |
| 8005191 | 2,05 | 4,14 | 0,00357 | 1,53  | 2,88  | 0,00379 | BC027986 TAX1BP3 |            |
| 8011407 | 2,05 | 4,14 | 0,02179 | 1,55  | 2,93  | 0,00195 | NM_014604        | FAM50A     |
| 8170906 | 2,05 | 4,14 | 0,05993 | 3,74  | 13,34 | 0,00018 | NM_004699        | SGIP1      |
| 7902127 | 2,05 | 4,14 | 0,00248 | -2,04 | -4,11 | 0,00014 | NM_032291        | DPYSL3     |
| 8114920 | 2,05 | 4,14 | 0,00937 | 2,65  | 6,30  | 0,00009 | NM_001387        | SRR        |
| 8003722 | 2,05 | 4,13 | 0,00636 | 3,09  | 8,52  | 0,00127 | NM_021947        | MYO6       |
| 8120783 | 2,05 | 4,13 | 0,00331 | 1,84  | 3,59  | 0,00360 | NM_004999        | LIG4       |
| 7972737 | 2,05 | 4,13 | 0,06685 | 2,62  | 6,15  | 0,00401 | NM_002312        | FAM107B    |
| 7932160 | 2,04 | 4,13 | 0,02475 | 0,80  | 1,74  | 0,03416 | BC072452 COX7A2  |            |
| 8127629 | 2,04 | 4,13 | 0,00201 | 1,17  | 2,25  | 0,06241 | NM_001865        | C4orf14    |
| 8100532 | 2,04 | 4,13 | 0,00902 | 2,95  | 7,74  | 0,00066 | NM_032313        | TTC19      |

|         |      |      |         |       |        |         |              |          |
|---------|------|------|---------|-------|--------|---------|--------------|----------|
| 8005141 | 2,04 | 4,12 | 0,01630 | 3,19  | 9,10   | 0,00003 | NM_017775    | BCCIP    |
| 7931268 | 2,04 | 4,12 | 0,00546 | 2,02  | 4,05   | 0,00717 | NM_016567    | ACOT9    |
| 8171802 | 2,04 | 4,12 | 0,06473 | 3,55  | 11,73  | 0,00052 | NM_001037171 | MARVELD1 |
| 7929689 | 2,04 | 4,12 | 0,00026 | 2,62  | 6,13   | 0,00281 | NM_031484    | MICB     |
| 8118116 | 2,04 | 4,12 | 0,00953 | 4,68  | 25,65  | 0,00003 | NM_005931    | BRIX1    |
| 8104825 | 2,04 | 4,12 | 0,00255 | 1,34  | 2,52   | 0,01426 | NM_018321    | FNBP1    |
| 8164607 | 2,04 | 4,12 | 0,01944 | 2,32  | 4,98   | 0,00065 | NM_015033    | RAB13    |
| 7920422 | 2,04 | 4,12 | 0,05108 | 2,89  | 7,42   | 0,00314 | NM_002870    | LMBR1L   |
| 7963024 | 2,04 | 4,12 | 0,00171 | 1,99  | 3,98   | 0,02064 | NM_018113    | ---      |
| 8127419 | 2,04 | 4,12 | 0,02126 | 1,12  | 2,18   | 0,01069 | ---          | POTEF    |
| 8055151 | 2,04 | 4,12 | 0,04218 | 0,28  | 1,22   | 0,35742 | NM_001099771 | HSDL2    |
| 8157233 | 2,04 | 4,11 | 0,07915 | 1,31  | 2,48   | 0,06690 | NM_032303    | RABEP1   |
| 8004111 | 2,04 | 4,11 | 0,05953 | 3,05  | 8,31   | 0,00025 | NM_004703    | UBN2     |
| 8136516 | 2,04 | 4,11 | 0,00734 | 2,25  | 4,76   | 0,01264 | NM_173569    | MAP2     |
| 8047926 | 2,04 | 4,11 | 0,06556 | 2,02  | 4,06   | 0,00865 | NM_002374    | ATMIN    |
| 8156575 | 2,04 | 4,11 | 0,03469 | 4,19  | 18,20  | 0,00246 | NM_015251    | RNF217   |
| 8121825 | 2,04 | 4,11 | 0,03344 | 1,33  | 2,52   | 0,01111 | NM_152553    | WIPF1    |
| 8056860 | 2,04 | 4,10 | 0,03903 | 0,83  | 1,77   | 0,15269 | NM_003387    | ETV6     |
| 7953981 | 2,04 | 4,10 | 0,00722 | 2,88  | 7,38   | 0,00526 | NM_001987    | KIAA1468 |
| 8021496 | 2,04 | 4,10 | 0,00628 | 1,43  | 2,70   | 0,04039 | NM_020854    | MED23    |
| 8129522 | 2,04 | 4,10 | 0,01482 | 2,41  | 5,33   | 0,00203 | NM_004830    | LIMS3    |
| 8044333 | 2,03 | 4,10 | 0,00539 | 1,98  | 3,95   | 0,01563 | NR_027467    | LIMS3    |
| 8054519 | 2,03 | 4,10 | 0,00539 | 1,98  | 3,95   | 0,01563 | NR_027467    | FBXO22   |
| 7985053 | 2,03 | 4,10 | 0,01495 | 1,75  | 3,35   | 0,00333 | NM_147188    | LATS1    |
| 8130116 | 2,03 | 4,10 | 0,00144 | 1,69  | 3,22   | 0,00470 | NM_004690    | ARNTL2   |
| 7954527 | 2,03 | 4,09 | 0,06205 | 2,25  | 4,76   | 0,00439 | NM_020183    | GPR155   |
| 8056837 | 2,03 | 4,09 | 0,08045 | 2,07  | 4,20   | 0,00193 | NM_001033045 | KGFLP1   |
| 8155487 | 2,03 | 4,09 | 0,00215 | -0,03 | -1,02  | 0,94076 | NR_003674    | KGFLP1   |
| 8161423 | 2,03 | 4,09 | 0,00215 | -0,03 | -1,02  | 0,94076 | NR_003674    | KGFLP1   |
| 8161455 | 2,03 | 4,09 | 0,00215 | -0,03 | -1,02  | 0,94076 | NR_003674    | DIAPH2   |
| 8168691 | 2,03 | 4,09 | 0,00901 | 2,25  | 4,77   | 0,00164 | NM_006729    | ---      |
| 7926670 | 2,03 | 4,09 | 0,00142 | 1,33  | 2,51   | 0,09331 | ---          | ETV1     |
| 8138289 | 2,03 | 4,09 | 0,03167 | 0,11  | 1,08   | 0,77490 | NM_004956    | IL15RA   |
| 7931899 | 2,03 | 4,08 | 0,00164 | 1,97  | 3,92   | 0,04665 | NM_002189    | FOXP1    |
| 8088776 | 2,03 | 4,08 | 0,00690 | 1,60  | 3,04   | 0,00062 | NM_032682    | ---      |
| 8129095 | 2,03 | 4,08 | 0,01669 | 2,33  | 5,04   | 0,01087 | ---          | SMAGP    |
| 7963280 | 2,03 | 4,08 | 0,05492 | 2,67  | 6,36   | 0,00050 | NM_001033873 | SARS     |
| 7903619 | 2,03 | 4,08 | 0,02043 | 3,56  | 11,79  | 0,00091 | NM_006513    | GPC6     |
| 7969613 | 2,03 | 4,07 | 0,08934 | -1,54 | -2,90  | 0,00026 | NM_005708    | SCPEP1   |
| 8008646 | 2,03 | 4,07 | 0,01112 | 2,40  | 5,27   | 0,00241 | NM_021626    | COG3     |
| 7968931 | 2,03 | 4,07 | 0,04800 | 2,96  | 7,76   | 0,00147 | NM_031431    | HAX1     |
| 7905733 | 2,03 | 4,07 | 0,15097 | 2,62  | 6,13   | 0,00325 | NM_006118    | ATP8B4   |
| 7988644 | 2,02 | 4,07 | 0,02100 | -0,50 | -1,42  | 0,14600 | NM_024837    | RPAP2    |
| 7902992 | 2,02 | 4,07 | 0,00866 | 1,01  | 2,02   | 0,06997 | NM_024813    | PINK1    |
| 7913252 | 2,02 | 4,06 | 0,00210 | 1,68  | 3,21   | 0,00052 | NM_032409    | RASAL2   |
| 7907611 | 2,02 | 4,06 | 0,02533 | 3,93  | 15,24  | 0,00000 | NM_170692    | GCC2     |
| 8044236 | 2,02 | 4,06 | 0,04772 | 1,24  | 2,36   | 0,10517 | NM_181453    | SLC20A1  |
| 8044499 | 2,02 | 4,06 | 0,04077 | 3,15  | 8,88   | 0,00041 | NM_005415    | ZNF143   |
| 7938331 | 2,02 | 4,06 | 0,03145 | 2,82  | 7,08   | 0,00040 | NM_003442    | UBA52    |
| 8027024 | 2,02 | 4,06 | 0,00010 | 1,54  | 2,92   | 0,00557 | NM_001033930 | PVRL3    |
| 8081548 | 2,02 | 4,06 | 0,01192 | 1,91  | 3,75   | 0,01184 | NM_015480    | P2RX4    |
| 7959267 | 2,02 | 4,06 | 0,05233 | 3,79  | 13,79  | 0,00050 | NM_002560    | RASSF2   |
| 8064790 | 2,02 | 4,06 | 0,03710 | 1,53  | 2,89   | 0,02281 | NM_014737    | DPY19L1  |
| 8138977 | 2,02 | 4,05 | 0,12171 | 3,78  | 13,71  | 0,00001 | NM_015283    | PDXDC1   |
| 7993433 | 2,02 | 4,05 | 0,00655 | 2,41  | 5,32   | 0,02159 | NM_015027    | IDS      |
| 8175593 | 2,02 | 4,05 | 0,02218 | 2,86  | 7,26   | 0,00035 | NM_000202    | HMGB1    |
| 8078248 | 2,02 | 4,05 | 0,09579 | 2,22  | 4,67   | 0,00224 | NM_002128    | MAPKSP1  |
| 8101925 | 2,02 | 4,05 | 0,04251 | 2,83  | 7,13   | 0,00183 | NM_021970    | RFC1     |
| 8165672 | 2,02 | 4,05 | 0,20700 | -4,56 | -23,63 | 0,03126 | L23320       | OSBPL1A  |
| 8022572 | 2,02 | 4,04 | 0,01043 | 0,63  | 1,55   | 0,01966 | NM_080597    | BPNT1    |
| 7924388 | 2,02 | 4,04 | 0,00021 | 2,36  | 5,12   | 0,01522 | NM_006085    | FAM118B  |
| 7945058 | 2,02 | 4,04 | 0,03277 | 2,88  | 7,34   | 0,00075 | NM_024556    | CPPED1   |
| 7999553 | 2,01 | 4,04 | 0,01209 | 2,30  | 4,92   | 0,00043 | NM_018340    | SNRPC    |
| 8118826 | 2,01 | 4,04 | 0,02239 | 0,39  | 1,31   | 0,40108 | NM_003093    | TJP1     |
| 7986977 | 2,01 | 4,04 | 0,01436 | 2,26  | 4,80   | 0,08068 | NM_003257    | HIST1H4H |
| 8124448 | 2,01 | 4,04 | 0,12393 | 4,30  | 19,64  | 0,00028 | NM_003543    | ZNF791   |
| 8026007 | 2,01 | 4,04 | 0,15907 | 3,85  | 14,45  | 0,00065 | NM_153358    | CREBBP   |
| 7999044 | 2,01 | 4,04 | 0,01424 | 3,23  | 9,36   | 0,00045 | NM_004380    | SSNA1    |
| 8159609 | 2,01 | 4,03 | 0,04638 | 2,59  | 6,01   | 0,00204 | NM_003731    | CPNE1    |
| 8065963 | 2,01 | 4,03 | 0,01954 | 3,08  | 8,43   | 0,00062 | NM_152930    | HIBADH   |
| 8138776 | 2,01 | 4,03 | 0,08421 | 4,14  | 17,60  | 0,00013 | NM_152740    | SRD5A3   |
| 8095139 | 2,01 | 4,02 | 0,03700 | 3,32  | 10,01  | 0,00108 | NM_024592    | BBS2     |
| 8001507 | 2,01 | 4,02 | 0,01654 | 4,02  | 16,20  | 0,00011 | NM_031885    | NPAS2    |

|         |      |      |         |       |       |         |                      |                |
|---------|------|------|---------|-------|-------|---------|----------------------|----------------|
| 8043909 | 2,01 | 4,02 | 0,00346 | 2,54  | 5,82  | 0,00813 | NM_002518            | BAZ2A          |
| 7964203 | 2,01 | 4,02 | 0,00857 | 3,70  | 12,99 | 0,00023 | NM_013449            | ---            |
| 7988281 | 2,01 | 4,02 | 0,07124 | 0,46  | 1,37  | 0,06366 | ---                  | FAM76A         |
| 7899350 | 2,01 | 4,02 | 0,00528 | 1,04  | 2,06  | 0,01892 | NM_001143912         | EIF1AX         |
| 7912852 | 2,01 | 4,02 | 0,02527 | 2,57  | 5,94  | 0,02261 | NM_001412            | C3orf38        |
| 8081073 | 2,00 | 4,01 | 0,01058 | 1,25  | 2,38  | 0,00153 | NM_173824            | DHDDS          |
| 7899173 | 2,00 | 4,01 | 0,01545 | 2,15  | 4,43  | 0,00110 | NM_024887            | WDR19          |
| 8094638 | 2,00 | 4,01 | 0,02937 | 2,20  | 4,59  | 0,00130 | NM_025132            | TMLHE          |
| 8176255 | 2,00 | 4,01 | 0,02122 | 2,06  | 4,16  | 0,00288 | NM_018196            | GSTT1          |
| 8074980 | 2,00 | 4,01 | 0,02243 | 2,63  | 6,19  | 0,00438 | NM_000853            | IDI1           |
| 7931754 | 2,00 | 4,00 | 0,04148 | 2,39  | 5,24  | 0,00300 | NM_004508            | EPDR1          |
| 8132369 | 2,00 | 4,00 | 0,00444 | 1,04  | 2,05  | 0,08003 | NM_017549            | PPFIA1         |
| 7942174 | 2,00 | 4,00 | 0,06043 | 3,30  | 9,82  | 0,00046 | NM_003626            | AGPAT5         |
| 8144378 | 2,00 | 4,00 | 0,00068 | 4,07  | 16,84 | 0,00116 | NM_018361            | RAD23B         |
| 8157125 | 2,00 | 4,00 | 0,00285 | 2,31  | 4,97  | 0,00127 | NM_002874            | SMG1           |
| 8000834 | 2,00 | 4,00 | 0,00519 | 2,37  | 5,19  | 0,00208 | NM_015092            | ARPP19         |
| 8110618 | 2,00 | 3,99 | 0,12856 | 2,17  | 4,50  | 0,02449 | NM_006628            | GPR176         |
| 7987439 | 2,00 | 3,99 | 0,02530 | 0,47  | 1,38  | 0,06704 | NM_007223            | TPP2           |
| 7969881 | 2,00 | 3,99 | 0,00385 | 2,36  | 5,13  | 0,00148 | NM_003291            | ARMC1          |
| 8151066 | 2,00 | 3,99 | 0,06057 | 3,91  | 15,01 | 0,00007 | NM_018120            | PSMB4          |
| 7905395 | 2,00 | 3,99 | 0,01211 | 2,62  | 6,14  | 0,00300 | NM_002796            | GTF3A          |
| 7968242 | 2,00 | 3,99 | 0,04528 | 1,74  | 3,34  | 0,00224 | NM_002097            | CBWD1          |
| 8044613 | 1,99 | 3,99 | 0,00250 | 1,77  | 3,40  | 0,00158 | NM_001145355         | PDHB           |
| 8088384 | 1,99 | 3,99 | 0,05184 | 2,45  | 5,46  | 0,00049 | NM_000925            | DUSP22         |
| 8116548 | 1,99 | 3,98 | 0,00423 | 1,40  | 2,65  | 0,05341 | NM_020185            | STX17          |
| 8156861 | 1,99 | 3,98 | 0,01813 | 2,88  | 7,38  | 0,00004 | NM_017919            | WRN            |
| 8145702 | 1,99 | 3,98 | 0,01336 | 2,64  | 6,25  | 0,00448 | NM_000553            | FAM38B         |
| 8022310 | 1,99 | 3,98 | 0,02721 | 0,67  | 1,59  | 0,04033 | NM_022068            | MKRN1          |
| 8143387 | 1,99 | 3,98 | 0,01046 | 2,72  | 6,58  | 0,00069 | NM_013446            | VPS13B         |
| 8147580 | 1,99 | 3,98 | 0,02398 | 3,08  | 8,46  | 0,00164 | NM_017890            | DPY19L3        |
| 8027448 | 1,99 | 3,98 | 0,01694 | 1,27  | 2,41  | 0,03516 | NM_001172774         | ---            |
| 7903474 | 1,99 | 3,98 | 0,00020 | 0,86  | 1,81  | 0,10489 | ---                  | MAP7D3         |
| 8175369 | 1,99 | 3,97 | 0,01028 | 1,59  | 3,01  | 0,03156 | NM_024597            | PACS1          |
| 7941537 | 1,99 | 3,97 | 0,05434 | 2,99  | 7,96  | 0,00069 | NM_018026            | MADD           |
| 7939767 | 1,99 | 3,97 | 0,00015 | 2,69  | 6,44  | 0,00094 | NM_003682            | CALR           |
| 8026106 | 1,99 | 3,97 | 0,02559 | 3,17  | 9,00  | 0,00516 | NM_004343            | SAMM50         |
| 8073645 | 1,99 | 3,97 | 0,02684 | 4,60  | 24,22 | 0,00001 | NM_015380            | BBS4           |
| 7984686 | 1,99 | 3,96 | 0,05335 | 1,21  | 2,31  | 0,00547 | NM_033028            | MASTL          |
| 7926821 | 1,99 | 3,96 | 0,00869 | 2,90  | 7,44  | 0,00182 | NM_001172303         | HSP90AA1       |
| 7981335 | 1,99 | 3,96 | 0,02472 | 2,05  | 4,14  | 0,02418 | NM_001017963         | TAP1           |
| 8125512 | 1,99 | 3,96 | 0,00423 | 1,87  | 3,67  | 0,01792 | NM_000593            | TAP1           |
| 8178867 | 1,99 | 3,96 | 0,00423 | 1,87  | 3,67  | 0,01792 | NM_000593            | TAP1           |
| 8180061 | 1,99 | 3,96 | 0,00423 | 1,87  | 3,67  | 0,01792 | NM_000593            | ZNF614         |
| 8038933 | 1,99 | 3,96 | 0,01097 | 1,80  | 3,49  | 0,00411 | NM_025040            | DPYD           |
| 7917912 | 1,99 | 3,96 | 0,12893 | -0,05 | -1,04 | 0,72188 | NM_000110            | GPR126         |
| 8122365 | 1,98 | 3,96 | 0,00741 | 3,57  | 11,84 | 0,02845 | NM_020455            | LRCH2          |
| 8174610 | 1,98 | 3,96 | 0,01339 | 0,12  | 1,08  | 0,68436 | NM_020871            | PPARA          |
| 8073826 | 1,98 | 3,96 | 0,00583 | 1,50  | 2,82  | 0,12505 | NM_005036            | RNF170         |
| 8150565 | 1,98 | 3,95 | 0,00953 | 2,28  | 4,87  | 0,00235 | NM_001160223         | DDX19B         |
| 7997048 | 1,98 | 3,95 | 0,04688 | 2,28  | 4,86  | 0,00076 | NM_007242            | KCTD10         |
| 7966202 | 1,98 | 3,95 | 0,00874 | 1,76  | 3,39  | 0,00630 | NM_031954            | ABCF3          |
| 8084360 | 1,98 | 3,95 | 0,00219 | 2,30  | 4,91  | 0,02578 | NM_018358            | SMG1           |
| 8000651 | 1,98 | 3,95 | 0,00005 | 2,34  | 5,07  | 0,00077 | NM_015092            | NUDCD1         |
| 8152340 | 1,98 | 3,95 | 0,02038 | 2,37  | 5,16  | 0,00097 | NM_001128211         | SEC23IP        |
| 7930956 | 1,98 | 3,95 | 0,06988 | 2,52  | 5,75  | 0,00146 | NM_007190            | IER3           |
| 8178435 | 1,98 | 3,95 | 0,05185 | 2,77  | 6,83  | 0,00015 | NM_003897            | TSPAN6         |
| 8173941 | 1,98 | 3,95 | 0,01568 | 3,17  | 8,99  | 0,00005 | NM_003270            | MT1P3 // MT1P3 |
| 8062119 | 1,98 | 3,95 | 0,02192 | 2,01  | 4,02  | 0,00442 | BC133653 // BC133653 | BTBD7          |
| 7980998 | 1,98 | 3,95 | 0,02580 | 3,36  | 10,24 | 0,00004 | NM_001002860         | VEGFC          |
| 8103822 | 1,98 | 3,94 | 0,07105 | 1,44  | 2,71  | 0,06367 | NM_005429            | FZD7           |
| 8047487 | 1,98 | 3,94 | 0,00216 | 0,40  | 1,32  | 0,53878 | NM_003507            | ---            |
| 8043743 | 1,98 | 3,94 | 0,05551 | -0,48 | -1,40 | 0,41134 | ---                  | TCTN1          |
| 7958692 | 1,98 | 3,94 | 0,00903 | 2,18  | 4,53  | 0,02999 | NM_001173975         | ARF1           |
| 7910229 | 1,98 | 3,94 | 0,00121 | 2,53  | 5,79  | 0,00143 | NM_001024226         | MTX2           |
| 8046573 | 1,98 | 3,94 | 0,07725 | 3,60  | 12,13 | 0,00064 | NR_027850            | FUCA2          |
| 8129974 | 1,98 | 3,94 | 0,02929 | 2,29  | 4,88  | 0,00308 | NM_032020            | FBXO11         |
| 8052024 | 1,98 | 3,93 | 0,02817 | 3,21  | 9,23  | 0,00087 | NM_025133            | HIST2H2BE      |
| 7919625 | 1,98 | 3,93 | 0,03419 | 2,71  | 6,52  | 0,00101 | NM_003528            | WDR75          |
| 8046975 | 1,97 | 3,93 | 0,04469 | 3,38  | 10,39 | 0,00597 | NM_032168            | ZCCHC6         |
| 8162147 | 1,97 | 3,93 | 0,03326 | 2,72  | 6,61  | 0,00589 | NM_024617            | AFAP1          |
| 8099259 | 1,97 | 3,93 | 0,02425 | 2,49  | 5,62  | 0,00098 | NM_198595            | CDC42SE1       |
| 7919888 | 1,97 | 3,93 | 0,01042 | 2,58  | 5,98  | 0,01213 | NM_001038707         | DYNLRB1        |
| 8062016 | 1,97 | 3,93 | 0,00037 | 1,30  | 2,45  | 0,04186 | NM_014183            | SLC25A3        |

|         |      |      |         |       |       |         |                |            |
|---------|------|------|---------|-------|-------|---------|----------------|------------|
| 7957746 | 1,97 | 3,93 | 0,02035 | 2,38  | 5,21  | 0,00169 | NM_213611      | HS2ST1     |
| 7902789 | 1,97 | 3,92 | 0,02914 | 1,97  | 3,93  | 0,00108 | NM_012262      | WAPAL      |
| 7934812 | 1,97 | 3,92 | 0,00259 | 2,64  | 6,23  | 0,00671 | NM_015045      | ATTR       |
| 8173673 | 1,97 | 3,92 | 0,01686 | 1,32  | 2,50  | 0,01385 | NM_000489      | PRR13      |
| 7955810 | 1,97 | 3,92 | 0,00243 | 2,03  | 4,08  | 0,00025 | NM_018457      | MAGEH1     |
| 8167887 | 1,97 | 3,92 | 0,02149 | 0,81  | 1,76  | 0,00173 | NM_014061      | SNTB2      |
| 7996908 | 1,97 | 3,92 | 0,00399 | 2,06  | 4,17  | 0,02875 | NM_006750      | TPM1       |
| 7984079 | 1,97 | 3,91 | 0,00503 | 2,00  | 4,00  | 0,01004 | NM_000366      | FAM49B     |
| 8152845 | 1,97 | 3,91 | 0,00835 | 2,66  | 6,32  | 0,00105 | BC017297 USP39 |            |
| 8043218 | 1,97 | 3,91 | 0,01089 | 2,72  | 6,58  | 0,00044 | NM_006590      | SRGAP1     |
| 7956759 | 1,97 | 3,91 | 0,00873 | 4,05  | 16,60 | 0,00006 | NM_020762      | PFDN2      |
| 7921786 | 1,97 | 3,91 | 0,09684 | 3,64  | 12,48 | 0,00093 | NM_012394      | FIG4       |
| 8121429 | 1,97 | 3,91 | 0,03347 | 2,46  | 5,51  | 0,00021 | NM_014845      | ---        |
| 8032972 | 1,97 | 3,91 | 0,00711 | 1,51  | 2,86  | 0,00460 | --- TSEN15     |            |
| 7908147 | 1,96 | 3,90 | 0,02862 | 3,70  | 13,01 | 0,00008 | NM_052965      | KIAA1432   |
| 8154254 | 1,96 | 3,90 | 0,05913 | 2,65  | 6,28  | 0,00037 | NM_020829      | GPR89B     |
| 7904930 | 1,96 | 3,90 | 0,01068 | 3,08  | 8,45  | 0,00115 | NM_016334      | C10orf137  |
| 7931239 | 1,96 | 3,90 | 0,01838 | 3,06  | 8,33  | 0,00114 | NM_015608      | NCOR1      |
| 8012961 | 1,96 | 3,89 | 0,00376 | 1,76  | 3,39  | 0,00411 | NM_006311      | UBE2L6     |
| 7948274 | 1,96 | 3,89 | 0,00331 | 0,33  | 1,26  | 0,53668 | NM_004223      | CHD1       |
| 8113305 | 1,96 | 3,89 | 0,02224 | 2,69  | 6,44  | 0,00617 | NM_001270      | CUL1       |
| 8137054 | 1,96 | 3,89 | 0,03855 | 3,14  | 8,84  | 0,00077 | NM_003592      | ZNF90      |
| 8027254 | 1,96 | 3,89 | 0,00103 | 1,16  | 2,24  | 0,14243 | NM_007138      | UBE2D2     |
| 8108435 | 1,96 | 3,89 | 0,03490 | 2,37  | 5,17  | 0,00655 | NM_181838      | AKTIP      |
| 8001410 | 1,96 | 3,89 | 0,00984 | 2,63  | 6,21  | 0,00352 | NM_001012398   | DTWD1      |
| 7983638 | 1,96 | 3,89 | 0,02996 | 1,20  | 2,30  | 0,21862 | NM_020234      | RPL41      |
| 7956159 | 1,96 | 3,89 | 0,01255 | 0,84  | 1,79  | 0,29495 | NM_001035267   | KIAA0319L  |
| 7914809 | 1,96 | 3,89 | 0,02487 | 2,21  | 4,62  | 0,00131 | NM_024874      | HMGB2      |
| 8103728 | 1,96 | 3,89 | 0,00384 | 0,93  | 1,91  | 0,20266 | NM_001130688   | PGM1       |
| 7901951 | 1,96 | 3,89 | 0,00114 | 1,71  | 3,28  | 0,00037 | NM_002633      | C2orf42    |
| 8052834 | 1,96 | 3,89 | 0,04461 | 3,80  | 13,88 | 0,00010 | BC005079 FUT11 |            |
| 7928395 | 1,96 | 3,89 | 0,00217 | 2,92  | 7,59  | 0,00701 | NM_173540      | ---        |
| 8128695 | 1,96 | 3,89 | 0,01083 | 0,78  | 1,72  | 0,08435 | --- ARHGAP28   |            |
| 8019964 | 1,96 | 3,89 | 0,08306 | 0,36  | 1,28  | 0,18929 | NM_001010000   | SIAE       |
| 7952408 | 1,96 | 3,88 | 0,02000 | 1,64  | 3,11  | 0,00013 | NM_170601      | EVIS       |
| 7917707 | 1,96 | 3,88 | 0,01966 | 2,44  | 5,42  | 0,00175 | NM_005665      | FAM54B     |
| 7899057 | 1,96 | 3,88 | 0,00081 | 1,69  | 3,22  | 0,01426 | NM_019557      | PAK1       |
| 7950578 | 1,96 | 3,88 | 0,01952 | 4,24  | 18,85 | 0,00007 | NM_001128620   | PLOD1      |
| 7897803 | 1,96 | 3,88 | 0,02258 | 2,87  | 7,32  | 0,00078 | NM_000302      | ST20       |
| 7990815 | 1,96 | 3,88 | 0,04716 | 4,14  | 17,68 | 0,00176 | NM_001100880   | DDX18      |
| 8044745 | 1,96 | 3,88 | 0,07467 | 3,03  | 8,19  | 0,00174 | NM_006773      | GPR89B     |
| 7919251 | 1,96 | 3,88 | 0,01141 | 3,03  | 8,19  | 0,00096 | NM_016334      | DNAJC19    |
| 8092314 | 1,95 | 3,87 | 0,00118 | 0,89  | 1,86  | 0,11481 | NM_145261      | GIT1       |
| 8013923 | 1,95 | 3,87 | 0,04135 | 2,92  | 7,56  | 0,00104 | NM_001085454   | GABPA      |
| 8133030 | 1,95 | 3,87 | 0,01298 | 2,05  | 4,13  | 0,00284 | NM_002040      | RAP1A      |
| 7903988 | 1,95 | 3,87 | 0,00532 | 1,40  | 2,63  | 0,02416 | NM_001010935   | CBARA1     |
| 7934255 | 1,95 | 3,87 | 0,01906 | 2,80  | 6,98  | 0,00006 | NM_006077      | MED20      |
| 8126360 | 1,95 | 3,87 | 0,01427 | 2,90  | 7,48  | 0,00183 | NM_004275      | MPI        |
| 7984922 | 1,95 | 3,87 | 0,02638 | 3,27  | 9,62  | 0,00187 | NM_002435      | BTG3       |
| 8069565 | 1,95 | 3,87 | 0,00746 | 2,83  | 7,12  | 0,00245 | NM_001130914   | IL18       |
| 7951686 | 1,95 | 3,87 | 0,00710 | 3,78  | 13,71 | 0,00331 | NM_001562      | AGTPBP1    |
| 8162086 | 1,95 | 3,86 | 0,03772 | 3,52  | 11,47 | 0,00098 | NM_015239      | CPSF7      |
| 7948574 | 1,95 | 3,86 | 0,02321 | 3,31  | 9,93  | 0,00065 | NM_024811      | TMEM184B   |
| 8076046 | 1,95 | 3,86 | 0,00430 | 3,65  | 12,54 | 0,00001 | NM_012264      | SUMO1      |
| 8058335 | 1,95 | 3,86 | 0,08765 | 2,82  | 7,07  | 0,00235 | NM_003352      | SNORD116-3 |
| 7981953 | 1,95 | 3,86 | 0,10189 | -2,76 | -6,78 | 0,01769 | NR_003318      | SNORD116-3 |
| 7981966 | 1,95 | 3,86 | 0,10189 | -2,76 | -6,78 | 0,01769 | NR_003318      | UBE3B      |
| 7958532 | 1,95 | 3,86 | 0,02760 | 3,62  | 12,28 | 0,00128 | NM_130466      | DDHD2      |
| 8145922 | 1,95 | 3,86 | 0,02437 | 2,99  | 7,92  | 0,00217 | NM_015214      | VGLL4      |
| 8085340 | 1,95 | 3,86 | 0,00408 | 1,84  | 3,58  | 0,00040 | NM_014667      | IFIT3      |
| 7929052 | 1,95 | 3,86 | 0,06559 | -0,29 | -1,22 | 0,10732 | NM_001031683   | FLJ44253   |
| 8071051 | 1,95 | 3,85 | 0,02193 | 2,41  | 5,33  | 0,00064 | AK126241       | RANBP6     |
| 8160016 | 1,95 | 3,85 | 0,02656 | 2,03  | 4,08  | 0,00236 | NM_012416      | SLC25A39   |
| 8016018 | 1,95 | 3,85 | 0,03037 | 3,53  | 11,59 | 0,00053 | NM_001143780   | ZFC3H1     |
| 7964937 | 1,94 | 3,85 | 0,01418 | 2,10  | 4,29  | 0,00222 | NM_144982      | RANBP2     |
| 8044263 | 1,94 | 3,85 | 0,04297 | 3,01  | 8,07  | 0,00045 | NM_006267      | FIBP       |
| 7949518 | 1,94 | 3,85 | 0,01162 | 2,55  | 5,87  | 0,00088 | NM_198897      | RAB2B      |
| 7977736 | 1,94 | 3,85 | 0,00615 | 2,36  | 5,14  | 0,00489 | NM_032846      | ZNF217     |
| 8067113 | 1,94 | 3,84 | 0,00177 | 2,50  | 5,64  | 0,00012 | NM_006526      | RBM22      |
| 8115168 | 1,94 | 3,84 | 0,01671 | 3,48  | 11,15 | 0,00022 | NM_018047      | TIMM9      |
| 7979416 | 1,94 | 3,84 | 0,00491 | 2,25  | 4,75  | 0,00479 | NM_012460      | SEPP1      |
| 8111915 | 1,94 | 3,84 | 0,05379 | 1,76  | 3,40  | 0,00309 | NM_005410      | VAMP2      |
| 8012376 | 1,94 | 3,84 | 0,00656 | 3,33  | 10,06 | 0,00012 | NM_014232      | C4orf3     |

|         |      |      |         |       |       |         |              |           |
|---------|------|------|---------|-------|-------|---------|--------------|-----------|
| 8102518 | 1,94 | 3,84 | 0,00803 | 1,02  | 2,02  | 0,04453 | NM_001170330 | AOX1      |
| 8047300 | 1,94 | 3,84 | 0,02508 | -1,51 | -2,84 | 0,00242 | NM_001159    | FBXO34    |
| 7974473 | 1,94 | 3,84 | 0,06652 | 3,64  | 12,45 | 0,00069 | NM_017943    | OLFML2B   |
| 7921882 | 1,94 | 3,84 | 0,00810 | -0,32 | -1,25 | 0,06321 | NM_015441    | FAM63B    |
| 7983940 | 1,94 | 3,84 | 0,09038 | 1,98  | 3,94  | 0,00050 | NM_001040450 | HSD17B12  |
| 7939465 | 1,94 | 3,83 | 0,01129 | 3,63  | 12,36 | 0,00034 | NM_016142    | SEC22C    |
| 8086406 | 1,94 | 3,83 | 0,14446 | 3,33  | 10,07 | 0,00058 | NM_004206    | STAT5B    |
| 8015590 | 1,94 | 3,83 | 0,02010 | 2,32  | 4,99  | 0,01459 | NM_012448    | ---       |
| 8056966 | 1,94 | 3,83 | 0,00496 | 1,16  | 2,23  | 0,03425 | ---          | HNRNPM    |
| 8025429 | 1,94 | 3,83 | 0,00218 | 2,00  | 4,00  | 0,00056 | NM_005968    | ZC3H15    |
| 8046848 | 1,94 | 3,83 | 0,01530 | 2,52  | 5,75  | 0,00143 | NM_018471    | DDX21     |
| 7927936 | 1,94 | 3,83 | 0,05057 | 3,26  | 9,60  | 0,00005 | NM_004728    | NDFIP2    |
| 7969544 | 1,94 | 3,83 | 0,09859 | 2,85  | 7,19  | 0,00003 | NM_019080    | USP42     |
| 8131387 | 1,94 | 3,83 | 0,04752 | 3,17  | 8,99  | 0,00006 | NM_032172    | DNM1L     |
| 7954752 | 1,94 | 3,83 | 0,00959 | 3,07  | 8,40  | 0,00006 | NM_012062    | ZNF3      |
| 8141380 | 1,94 | 3,83 | 0,01296 | 2,02  | 4,04  | 0,00838 | NM_032924    | IFNAR2    |
| 8068238 | 1,94 | 3,83 | 0,00268 | 2,42  | 5,34  | 0,00434 | NM_207585    | THOC5     |
| 8075239 | 1,94 | 3,82 | 0,03417 | 2,76  | 6,79  | 0,00512 | NM_001002878 | UBR1      |
| 7987981 | 1,94 | 3,82 | 0,04863 | 2,88  | 7,38  | 0,00561 | NM_174916    | COMT      |
| 8071289 | 1,93 | 3,82 | 0,00503 | 2,45  | 5,45  | 0,00828 | NM_000754    | MTM1      |
| 8170428 | 1,93 | 3,82 | 0,02046 | 1,27  | 2,41  | 0,00752 | NM_000252    | MGA       |
| 7982957 | 1,93 | 3,82 | 0,00761 | 2,66  | 6,30  | 0,00211 | NM_001164273 | CSNK1G1   |
| 7989628 | 1,93 | 3,82 | 0,00594 | 2,09  | 4,27  | 0,00194 | NM_022048    | RGL1      |
| 7908125 | 1,93 | 3,82 | 0,02332 | -0,17 | -1,13 | 0,74641 | NM_015149    | ENTPD4    |
| 8149793 | 1,93 | 3,82 | 0,02484 | 2,79  | 6,90  | 0,00007 | NM_004901    | SRXN1     |
| 8064375 | 1,93 | 3,82 | 0,04999 | 3,76  | 13,58 | 0,00011 | NM_080725    | RNF139    |
| 8148265 | 1,93 | 3,82 | 0,01740 | 2,56  | 5,91  | 0,00145 | NM_007218    | CCND1     |
| 7942123 | 1,93 | 3,82 | 0,00292 | 2,14  | 4,40  | 0,00046 | NM_053056    | MAPKAPK3  |
| 8080013 | 1,93 | 3,82 | 0,01749 | 0,87  | 1,83  | 0,01751 | NM_004635    | C5orf36   |
| 8113097 | 1,93 | 3,81 | 0,02239 | -0,14 | -1,10 | 0,68256 | NM_001145678 | AMD1      |
| 8121489 | 1,93 | 3,81 | 0,02785 | 2,78  | 6,86  | 0,00212 | NM_001634    | C10orf119 |
| 7936706 | 1,93 | 3,81 | 0,01163 | 3,15  | 8,89  | 0,01159 | NM_024834    | LRRFIP2   |
| 8086150 | 1,93 | 3,81 | 0,00119 | 1,51  | 2,85  | 0,01740 | NM_006309    | MIER1     |
| 7902166 | 1,93 | 3,81 | 0,03851 | 1,47  | 2,78  | 0,04345 | NM_020948    | PHYH      |
| 7932094 | 1,93 | 3,81 | 0,01952 | 0,72  | 1,64  | 0,13990 | NM_006214    | ACTR10    |
| 7974587 | 1,93 | 3,81 | 0,05876 | 4,25  | 19,00 | 0,00015 | NM_018477    | CEBPG     |
| 8027566 | 1,93 | 3,81 | 0,00175 | 2,83  | 7,12  | 0,00039 | NM_001806    | ABHD2     |
| 7985809 | 1,93 | 3,81 | 0,00980 | 2,37  | 5,18  | 0,00032 | NM_007011    | BOLA3     |
| 8053059 | 1,93 | 3,81 | 0,00610 | 1,13  | 2,19  | 0,11571 | NM_212552    | ZFAND1    |
| 8151561 | 1,93 | 3,81 | 0,06209 | 4,93  | 30,45 | 0,00002 | NM_024699    | PMS2      |
| 8138030 | 1,93 | 3,80 | 0,01852 | 2,83  | 7,12  | 0,01166 | NM_000535    | INTS2     |
| 8017283 | 1,93 | 3,80 | 0,03500 | 3,18  | 9,07  | 0,00118 | NR_026641    | EYA4      |
| 8122150 | 1,93 | 3,80 | 0,00858 | 0,41  | 1,33  | 0,26336 | NM_004100    | RRAGB     |
| 8167897 | 1,93 | 3,80 | 0,08240 | 2,55  | 5,87  | 0,00104 | NM_016656    | FBXO38    |
| 8109062 | 1,93 | 3,80 | 0,02521 | 2,06  | 4,16  | 0,02083 | NM_205836    | LRIG2     |
| 7904086 | 1,93 | 3,80 | 0,02663 | 3,00  | 8,01  | 0,00037 | NM_014813    | CARM1     |
| 8025766 | 1,93 | 3,80 | 0,04177 | 3,69  | 12,91 | 0,00461 | NM_199141    | CBR1      |
| 8068401 | 1,93 | 3,80 | 0,03751 | 2,52  | 5,72  | 0,00000 | NM_001757    | IP6K2     |
| 8087201 | 1,92 | 3,80 | 0,01552 | 2,74  | 6,70  | 0,00381 | NM_016291    | POLR2G    |
| 7940688 | 1,92 | 3,79 | 0,02920 | 2,37  | 5,17  | 0,00166 | NM_002696    | CDK16     |
| 8167103 | 1,92 | 3,79 | 0,00747 | 3,88  | 14,76 | 0,00038 | NM_006201    | EXOC4     |
| 8136293 | 1,92 | 3,79 | 0,00988 | 2,06  | 4,16  | 0,00249 | NM_021807    | CST3      |
| 8065403 | 1,92 | 3,79 | 0,00709 | -0,55 | -1,46 | 0,22545 | NM_000099    | SFT2D1    |
| 8130720 | 1,92 | 3,78 | 0,01737 | 2,28  | 4,85  | 0,00196 | NM_145169    | ALDH18A1  |
| 7935230 | 1,92 | 3,78 | 0,01006 | 2,75  | 6,73  | 0,00103 | NM_002860    | SMS       |
| 8166402 | 1,92 | 3,78 | 0,05402 | 0,07  | 1,05  | 0,90061 | NM_004595    | BACE1     |
| 7951910 | 1,92 | 3,78 | 0,01932 | 2,37  | 5,18  | 0,00016 | NM_012104    | N4BP2L2   |
| 7970907 | 1,92 | 3,78 | 0,01289 | 2,34  | 5,06  | 0,00120 | NM_014887    | LTBR      |
| 7953321 | 1,92 | 3,78 | 0,01166 | 2,76  | 6,77  | 0,00263 | NM_002342    | FBXL3     |
| 7972062 | 1,92 | 3,77 | 0,00313 | 1,72  | 3,30  | 0,01290 | NM_012158    | NARF      |
| 8010804 | 1,92 | 3,77 | 0,01069 | 3,23  | 9,38  | 0,00112 | NM_001038618 | VLDLR     |
| 8154100 | 1,92 | 3,77 | 0,03505 | 3,31  | 9,95  | 0,00001 | NM_003383    | POLR1E    |
| 8155268 | 1,91 | 3,77 | 0,03168 | 3,04  | 8,23  | 0,00001 | NM_022490    | GNPAT     |
| 7910520 | 1,91 | 3,77 | 0,00475 | 3,50  | 11,35 | 0,00067 | NM_014236    | PPME1     |
| 7942503 | 1,91 | 3,77 | 0,03563 | 3,17  | 8,98  | 0,00017 | NM_016147    | DISP1     |
| 7909954 | 1,91 | 3,77 | 0,00388 | 2,18  | 4,54  | 0,00526 | NM_032890    | SBF2      |
| 7946516 | 1,91 | 3,77 | 0,00542 | 2,28  | 4,86  | 0,00062 | NM_030962    | INTS4L2   |
| 8133095 | 1,91 | 3,76 | 0,02359 | 2,51  | 5,69  | 0,00328 | NR_027392    | CASD1     |
| 8134318 | 1,91 | 3,76 | 0,07284 | 4,14  | 17,58 | 0,00011 | NM_022900    | GPRC5A    |
| 7954065 | 1,91 | 3,76 | 0,06524 | 3,65  | 12,58 | 0,00013 | NM_003979    | RFTN2     |
| 8058063 | 1,91 | 3,76 | 0,00412 | -0,03 | -1,02 | 0,94909 | NM_144629    | CEP57     |
| 7943297 | 1,91 | 3,76 | 0,02164 | 3,22  | 9,34  | 0,00031 | NM_014679    | LHFP      |
| 7971150 | 1,91 | 3,76 | 0,04114 | 2,63  | 6,18  | 0,00520 | NM_005780    | ZNHIT3    |

|         |      |      |         |       |       |         |                  |                |
|---------|------|------|---------|-------|-------|---------|------------------|----------------|
| 8006627 | 1,91 | 3,76 | 0,00143 | 2,58  | 5,96  | 0,00082 | NM_004773        | MRPL37         |
| 7901601 | 1,91 | 3,76 | 0,00692 | 2,07  | 4,20  | 0,00584 | NM_016491        | TRIM16         |
| 8012953 | 1,91 | 3,76 | 0,00260 | 3,14  | 8,83  | 0,00056 | NM_006470        | RNF11          |
| 7901376 | 1,91 | 3,76 | 0,00125 | 1,07  | 2,10  | 0,04331 | NM_014372        | 05_Mrz         |
| 7929247 | 1,91 | 3,76 | 0,01512 | 3,53  | 11,52 | 0,00003 | NM_017824        | SCRG1          |
| 8103736 | 1,91 | 3,75 | 0,00758 | -1,18 | -2,27 | 0,00379 | NM_007281        | OTUD6B         |
| 8147262 | 1,91 | 3,75 | 0,07662 | 4,05  | 16,60 | 0,00003 | NM_016023        | CACNB3         |
| 7955142 | 1,91 | 3,75 | 0,02519 | 1,63  | 3,09  | 0,00324 | NM_000725        | HMCN1          |
| 7908204 | 1,91 | 3,75 | 0,03046 | -0,90 | -1,86 | 0,00117 | NM_031935        | SLC29A1        |
| 8119974 | 1,91 | 3,75 | 0,00656 | 2,67  | 6,34  | 0,00170 | NM_001078175     | LACTB2         |
| 8151296 | 1,91 | 3,75 | 0,01478 | 3,04  | 8,23  | 0,00373 | NM_016027        | AHCTF1         |
| 8056220 | 1,91 | 3,75 | 0,05400 | 3,48  | 11,15 | 0,00286 | NM_015446        | MIOS           |
| 8131479 | 1,91 | 3,75 | 0,00730 | 3,53  | 11,56 | 0,00003 | NM_019005        | ZBTB44         |
| 7952739 | 1,91 | 3,75 | 0,02346 | 2,32  | 4,99  | 0,06116 | NM_014155        | CBL            |
| 7944493 | 1,91 | 3,75 | 0,04013 | 3,15  | 8,87  | 0,00139 | NM_005188        | TM2D3          |
| 7991630 | 1,91 | 3,75 | 0,01290 | 2,17  | 4,51  | 0,00133 | NM_078474        | BTAF1          |
| 7929201 | 1,91 | 3,75 | 0,01246 | 2,74  | 6,66  | 0,01244 | NM_003972        | SNX27          |
| 7905444 | 1,90 | 3,74 | 0,00150 | 3,32  | 9,96  | 0,00000 | NM_030918        | ---            |
| 8088478 | 1,90 | 3,74 | 0,08550 | 3,05  | 8,31  | 0,00039 | --- INTS7        | ---            |
| 7924119 | 1,90 | 3,74 | 0,04081 | 4,30  | 19,73 | 0,00001 | NM_015434        | ALDH3A2        |
| 8005638 | 1,90 | 3,74 | 0,00133 | 2,75  | 6,73  | 0,00022 | NM_001031806     | ---            |
| 8083032 | 1,90 | 3,74 | 0,07442 | 0,05  | 1,04  | 0,79656 | --- SETD3        | ---            |
| 7981249 | 1,90 | 3,74 | 0,00770 | 3,10  | 8,57  | 0,00025 | NM_032233        | HDAC1          |
| 7899774 | 1,90 | 3,74 | 0,01829 | 3,42  | 10,73 | 0,00172 | NM_004964        | LRP10          |
| 7973352 | 1,90 | 3,74 | 0,00359 | 1,59  | 3,01  | 0,00299 | NM_014045        | CCRL1          |
| 8122334 | 1,90 | 3,74 | 0,01084 | -0,90 | -1,87 | 0,02554 | NM_178445        | DYNLL2         |
| 8008706 | 1,90 | 3,73 | 0,03543 | 2,01  | 4,03  | 0,00187 | NM_080677        | MKRN2          |
| 8077931 | 1,90 | 3,73 | 0,04813 | 2,52  | 5,74  | 0,00240 | NM_014160        | AKAP9          |
| 8134122 | 1,90 | 3,73 | 0,00501 | 0,86  | 1,82  | 0,04445 | NM_005751        | UBL5           |
| 8025500 | 1,90 | 3,72 | 0,03437 | 0,73  | 1,65  | 0,34963 | NM_024292        | ---            |
| 8117237 | 1,90 | 3,72 | 0,02338 | 2,21  | 4,62  | 0,06723 | --- SNX24        | ---            |
| 8107632 | 1,90 | 3,72 | 0,05859 | 2,28  | 4,87  | 0,00383 | NM_014035        | PI4KA          |
| 8074647 | 1,90 | 3,72 | 0,02011 | 3,43  | 10,78 | 0,00103 | NM_058004        | ARFGAP3        |
| 8076515 | 1,90 | 3,72 | 0,05777 | 1,86  | 3,64  | 0,00264 | NM_014570        | CYLD           |
| 7995552 | 1,89 | 3,72 | 0,02006 | 1,16  | 2,23  | 0,02029 | NM_015247        | SWAP70         |
| 7938370 | 1,89 | 3,72 | 0,00350 | 2,53  | 5,76  | 0,00019 | NM_015055        | SLC9A9         |
| 8091260 | 1,89 | 3,72 | 0,02538 | 0,25  | 1,19  | 0,62762 | NM_173653        | BAZ2B          |
| 8056060 | 1,89 | 3,72 | 0,00177 | 1,61  | 3,05  | 0,00189 | NM_013450        | C12orf49       |
| 7966738 | 1,89 | 3,72 | 0,02804 | 2,85  | 7,21  | 0,00179 | BC019843 FAM162A | ---            |
| 8082066 | 1,89 | 3,71 | 0,00059 | 0,47  | 1,39  | 0,16589 | NM_014367        | GUSB           |
| 8139859 | 1,89 | 3,71 | 0,00311 | 1,65  | 3,14  | 0,01316 | NM_000181        | CACYBP         |
| 8057554 | 1,89 | 3,71 | 0,03553 | 3,21  | 9,25  | 0,00072 | NM_014412        | LGR4           |
| 7947199 | 1,89 | 3,71 | 0,00443 | 3,52  | 11,49 | 0,00001 | NM_018490        | KLHL13         |
| 8174654 | 1,89 | 3,71 | 0,02480 | 0,94  | 1,92  | 0,01265 | NM_033495        | DHX29          |
| 8112081 | 1,89 | 3,71 | 0,00667 | 2,16  | 4,46  | 0,00511 | NM_019030        | ASPN           |
| 8162394 | 1,89 | 3,71 | 0,00822 | -0,84 | -1,79 | 0,00400 | NM_017680        | CTTNBP2NL      |
| 7904018 | 1,89 | 3,71 | 0,04175 | 1,47  | 2,76  | 0,01433 | NM_018704        | GFM1           |
| 8083630 | 1,89 | 3,70 | 0,02784 | 2,55  | 5,87  | 0,00302 | NM_024996        | TTL7           |
| 7917199 | 1,89 | 3,70 | 0,00722 | 2,09  | 4,26  | 0,00116 | NM_024686        | SGCD           |
| 8109490 | 1,89 | 3,70 | 0,05770 | -0,83 | -1,78 | 0,00320 | NM_000337        | MAGI1          |
| 8088602 | 1,89 | 3,70 | 0,02623 | 1,32  | 2,50  | 0,00482 | NM_015520        | ABR            |
| 8010983 | 1,89 | 3,70 | 0,05391 | 2,90  | 7,47  | 0,00616 | NM_021962        | ---            |
| 7957271 | 1,89 | 3,70 | 0,00018 | 0,42  | 1,34  | 0,33625 | --- BUD31        | ---            |
| 8134589 | 1,89 | 3,70 | 0,00609 | 1,31  | 2,47  | 0,00265 | NM_003910        | UBE2A          |
| 8169645 | 1,89 | 3,70 | 0,01789 | 3,20  | 9,16  | 0,00213 | NM_003336        | SPPL3          |
| 7967091 | 1,89 | 3,70 | 0,06210 | 4,42  | 21,41 | 0,00009 | NM_139015        | GOLGB1         |
| 8089930 | 1,89 | 3,70 | 0,01269 | 1,61  | 3,05  | 0,00545 | NM_004487        | MID2           |
| 8169249 | 1,89 | 3,70 | 0,01777 | 1,48  | 2,80  | 0,00421 | NM_012216        | HIGD2A         |
| 8110166 | 1,89 | 3,70 | 0,06939 | 3,56  | 11,80 | 0,00085 | NM_138820        | LRRN3          |
| 8135488 | 1,89 | 3,70 | 0,02445 | -0,70 | -1,63 | 0,00458 | NM_001099660     | CABLES1        |
| 8020495 | 1,88 | 3,69 | 0,03940 | 2,54  | 5,82  | 0,00295 | NM_138375        | ---            |
| 7960516 | 1,88 | 3,69 | 0,00035 | 0,88  | 1,84  | 0,01488 | --- ERCC4        | ---            |
| 7993298 | 1,88 | 3,69 | 0,04496 | 3,08  | 8,44  | 0,00073 | NM_005236        | THYN1          |
| 7952869 | 1,88 | 3,69 | 0,01284 | 1,62  | 3,07  | 0,00624 | NM_014174        | SLC12A2        |
| 8107769 | 1,88 | 3,69 | 0,01003 | 1,75  | 3,35  | 0,00035 | NM_001046        | TXNDC15        |
| 8108166 | 1,88 | 3,69 | 0,00470 | 0,75  | 1,68  | 0,27719 | NM_024715        | DKFZp686O24166 |
| 7938702 | 1,88 | 3,69 | 0,04830 | 3,05  | 8,31  | 0,00047 | NR_026750        | HNRNPR         |
| 7913571 | 1,88 | 3,68 | 0,03094 | 3,25  | 9,50  | 0,00284 | NM_001102398     | RPL27A         |
| 7938286 | 1,88 | 3,68 | 0,00472 | 2,06  | 4,16  | 0,00083 | NM_000990        | SLC25A32       |
| 8152255 | 1,88 | 3,68 | 0,03246 | 4,83  | 28,40 | 0,00042 | NM_030780        | SRF            |
| 8119712 | 1,88 | 3,68 | 0,01006 | 3,43  | 10,77 | 0,00084 | NM_003131        | PRPSAP2        |
| 8005512 | 1,88 | 3,68 | 0,02205 | 3,88  | 14,77 | 0,00011 | NM_002767        | SMEK2          |
| 8052307 | 1,88 | 3,68 | 0,01444 | 2,52  | 5,74  | 0,00017 | NM_001122964     | ARRB1          |



|         |      |      |         |       |       |         |                  |          |
|---------|------|------|---------|-------|-------|---------|------------------|----------|
| 7950473 | 1,88 | 3,68 | 0,01722 | 3,72  | 13,19 | 0,00021 | NM_004041        | RPL27    |
| 8007441 | 1,88 | 3,68 | 0,06132 | 0,70  | 1,63  | 0,10875 | NM_000988        | HDAC3    |
| 8114691 | 1,88 | 3,68 | 0,00053 | 3,26  | 9,55  | 0,00008 | NM_003883        | DHX9     |
| 7908022 | 1,88 | 3,68 | 0,03582 | 3,85  | 14,41 | 0,00013 | NR_033302        | CS       |
| 7964064 | 1,88 | 3,68 | 0,05524 | 3,84  | 14,33 | 0,00011 | NM_004077        | IDH2     |
| 7991374 | 1,88 | 3,67 | 0,02783 | 3,04  | 8,23  | 0,00654 | NM_002168        | CRTC3    |
| 7986049 | 1,88 | 3,67 | 0,03500 | 3,00  | 8,01  | 0,00002 | NM_022769        | MLLT3    |
| 8160332 | 1,87 | 3,67 | 0,02475 | 1,84  | 3,58  | 0,00912 | NM_004529        | WDR11    |
| 7930996 | 1,87 | 3,67 | 0,02960 | 3,50  | 11,32 | 0,00109 | NM_018117        | DYNC1L11 |
| 8086008 | 1,87 | 3,67 | 0,06545 | 2,63  | 6,19  | 0,00195 | NM_016141        | C9orf123 |
| 8160036 | 1,87 | 3,66 | 0,00523 | 1,22  | 2,33  | 0,00674 | NM_033428        | FAM10A4  |
| 7969177 | 1,87 | 3,66 | 0,00034 | 0,05  | 1,04  | 0,88695 | NR_002183        | FASTKD5  |
| 8064581 | 1,87 | 3,66 | 0,02062 | 2,21  | 4,62  | 0,00367 | NM_021826        | STXBP5   |
| 8122600 | 1,87 | 3,66 | 0,04279 | 2,72  | 6,59  | 0,00383 | NM_001127715     | DYNLL1   |
| 7967067 | 1,87 | 3,66 | 0,01983 | -0,33 | -1,26 | 0,72774 | NM_001037495     | GUF1     |
| 8094876 | 1,87 | 3,66 | 0,05688 | 3,04  | 8,25  | 0,00179 | NM_021927        | ---      |
| 7942779 | 1,87 | 3,66 | 0,10424 | -0,86 | -1,82 | 0,34269 | ---              | TRAFD1   |
| 7958828 | 1,87 | 3,66 | 0,04730 | 2,67  | 6,36  | 0,00002 | NM_001143906     | C1orf124 |
| 7910539 | 1,87 | 3,65 | 0,02119 | 2,13  | 4,37  | 0,01129 | NM_001010984     | ARMC9    |
| 8049044 | 1,87 | 3,65 | 0,01607 | 0,55  | 1,46  | 0,28136 | NM_025139        | C17orf37 |
| 8014882 | 1,87 | 3,65 | 0,14750 | 3,60  | 12,17 | 0,00328 | NM_032339        | KIAA0090 |
| 7913110 | 1,87 | 3,65 | 0,03352 | 2,98  | 7,91  | 0,00210 | BC034589 C3orf10 |          |
| 8077770 | 1,87 | 3,65 | 0,00989 | 2,99  | 7,96  | 0,00154 | NM_018462        | ZNF532   |
| 8021442 | 1,87 | 3,65 | 0,00257 | 1,52  | 2,86  | 0,00265 | NM_018181        | ITGA11   |
| 7989985 | 1,86 | 3,64 | 0,01652 | -0,78 | -1,72 | 0,15748 | NM_001004439     | GRSF1    |
| 8100834 | 1,86 | 3,64 | 0,00694 | 1,66  | 3,17  | 0,00452 | NM_002092        | EBAG9    |
| 8147970 | 1,86 | 3,64 | 0,00926 | 1,81  | 3,51  | 0,00835 | NM_198120        | EDEM1    |
| 8077458 | 1,86 | 3,64 | 0,09330 | 3,39  | 10,50 | 0,00248 | NM_014674        | MIB1     |
| 8020423 | 1,86 | 3,64 | 0,02028 | 3,62  | 12,26 | 0,00082 | NM_020774        | MRPL22   |
| 8109475 | 1,86 | 3,63 | 0,00964 | 1,74  | 3,35  | 0,00564 | NM_014180        | GNL2     |
| 7915015 | 1,86 | 3,63 | 0,00211 | 2,06  | 4,17  | 0,00001 | NM_013285        | ---      |
| 7971858 | 1,86 | 3,63 | 0,07808 | 3,53  | 11,55 | 0,00501 | ---              | TMEM43   |
| 8077993 | 1,86 | 3,63 | 0,05193 | 2,06  | 4,18  | 0,01125 | NM_024334        | ABL1     |
| 8158725 | 1,86 | 3,63 | 0,03986 | 3,37  | 10,36 | 0,00082 | NM_005157        | TOR1AIP2 |
| 7922646 | 1,86 | 3,63 | 0,23220 | 4,94  | 30,75 | 0,00014 | NM_022347        | TCTN2    |
| 7959638 | 1,86 | 3,62 | 0,00085 | 2,07  | 4,21  | 0,01019 | NM_024809        | NAT15    |
| 7992905 | 1,86 | 3,62 | 0,02137 | 1,26  | 2,39  | 0,05356 | NM_001083601     | EIF2C4   |
| 7900009 | 1,86 | 3,62 | 0,03550 | 2,41  | 5,30  | 0,00688 | NM_017629        | KIAA1598 |
| 7936529 | 1,86 | 3,62 | 0,02206 | 1,79  | 3,47  | 0,14448 | NM_001127211     | METTL6   |
| 8085571 | 1,86 | 3,62 | 0,02917 | 3,09  | 8,54  | 0,00222 | NM_152396        | MTMR3    |
| 8072279 | 1,86 | 3,62 | 0,04192 | 2,68  | 6,42  | 0,00348 | NM_153050        | E2F4     |
| 7996455 | 1,86 | 3,62 | 0,00270 | 3,78  | 13,78 | 0,00005 | NM_001950        | ---      |
| 8165665 | 1,86 | 3,62 | 0,16850 | -0,61 | -1,53 | 0,01845 | ---              | RTCD1    |
| 7903321 | 1,86 | 3,62 | 0,02734 | 2,73  | 6,63  | 0,00005 | NM_001130841     | RABL5    |
| 8141728 | 1,86 | 3,62 | 0,01041 | 1,38  | 2,60  | 0,00599 | NM_022777        | MRAS     |
| 8082965 | 1,86 | 3,62 | 0,00301 | 0,62  | 1,54  | 0,15815 | NM_012219        | MIPEP    |
| 7970577 | 1,86 | 3,62 | 0,01572 | 0,42  | 1,33  | 0,07525 | NM_005932        | POPDC3   |
| 8128565 | 1,85 | 3,62 | 0,00577 | 3,53  | 11,56 | 0,00106 | NM_022361        | ZBTB24   |
| 8128767 | 1,85 | 3,62 | 0,00558 | 1,83  | 3,56  | 0,00315 | NM_014797        | MTFMT    |
| 7989708 | 1,85 | 3,61 | 0,05923 | 2,89  | 7,42  | 0,00075 | NM_139242        | C11orf1  |
| 7943779 | 1,85 | 3,61 | 0,00253 | 2,22  | 4,66  | 0,00648 | NM_022761        | TCF7L1   |
| 8043114 | 1,85 | 3,61 | 0,00554 | 1,68  | 3,20  | 0,00038 | NM_031283        | ---      |
| 7936833 | 1,85 | 3,61 | 0,05902 | 0,88  | 1,84  | 0,10931 | ---              | EMG1     |
| 7953594 | 1,85 | 3,61 | 0,01003 | 2,48  | 5,58  | 0,00117 | NM_006331        | ---      |
| 8084630 | 1,85 | 3,61 | 0,05303 | 3,86  | 14,50 | 0,00085 | ---              | CEP55    |
| 7929334 | 1,85 | 3,61 | 0,00279 | 3,93  | 15,28 | 0,00011 | NM_018131        | VEPH1    |
| 8091678 | 1,85 | 3,61 | 0,02314 | -0,18 | -1,13 | 0,52194 | NM_024621        | ZWILCH   |
| 7984330 | 1,85 | 3,61 | 0,05622 | 3,12  | 8,68  | 0,00116 | NR_003105        | C5orf36  |
| 8113103 | 1,85 | 3,61 | 0,05159 | 0,00  | 1,00  | 0,99931 | NM_001145678     | ZNF222   |
| 8029353 | 1,85 | 3,61 | 0,06199 | 0,87  | 1,83  | 0,09127 | NM_001129996     | CSNK2A1P |
| 7946655 | 1,85 | 3,60 | 0,02600 | 1,11  | 2,17  | 0,13043 | NR_002207        | DAB1     |
| 7916541 | 1,85 | 3,60 | 0,01333 | -1,51 | -2,84 | 0,00451 | NM_021080        | KIF13A   |
| 8124088 | 1,85 | 3,60 | 0,00865 | 2,96  | 7,79  | 0,00021 | NM_022113        | ASF1A    |
| 8121734 | 1,85 | 3,60 | 0,03568 | 2,26  | 4,79  | 0,02563 | NM_014034        | CCDC127  |
| 8110678 | 1,85 | 3,60 | 0,01926 | 1,07  | 2,10  | 0,10654 | NM_145265        | HLA-H    |
| 8117777 | 1,85 | 3,60 | 0,01757 | 2,40  | 5,28  | 0,00354 | NR_001434        | SLC25A1  |
| 8074388 | 1,85 | 3,59 | 0,00660 | 3,04  | 8,25  | 0,00124 | NM_005984        | C2CD3    |
| 7950336 | 1,85 | 3,59 | 0,00935 | 2,45  | 5,45  | 0,00049 | NM_015531        | FUS      |
| 7995069 | 1,85 | 3,59 | 0,02454 | 2,88  | 7,38  | 0,00215 | NM_004960        | C3orf31  |
| 8085350 | 1,84 | 3,59 | 0,10113 | 2,47  | 5,56  | 0,00650 | NM_138807        | CHMP2B   |
| 8081055 | 1,84 | 3,59 | 0,08997 | 2,50  | 5,65  | 0,00121 | NM_014043        | ZNF616   |
| 8038952 | 1,84 | 3,59 | 0,00178 | 0,47  | 1,38  | 0,20177 | BC032805 CD9     |          |
| 7953291 | 1,84 | 3,59 | 0,00432 | 2,59  | 6,03  | 0,00096 | NM_001769        | PSMF1    |

|         |      |      |         |       |       |         |              |               |
|---------|------|------|---------|-------|-------|---------|--------------|---------------|
| 8060379 | 1,84 | 3,59 | 0,03356 | 3,42  | 10,70 | 0,00410 | NM_178578    | COMMD10       |
| 8107458 | 1,84 | 3,59 | 0,00170 | 1,10  | 2,15  | 0,00901 | NM_016144    | HSPH1         |
| 7970864 | 1,84 | 3,59 | 0,01829 | 1,25  | 2,39  | 0,01637 | NM_006644    | MMP3          |
| 7951284 | 1,84 | 3,59 | 0,01392 | -0,61 | -1,53 | 0,00572 | NM_002422    | NT5C3L        |
| 8015445 | 1,84 | 3,58 | 0,00652 | 2,62  | 6,14  | 0,00244 | NR_033465    | IFI30         |
| 8026971 | 1,84 | 3,58 | 0,01431 | 3,55  | 11,69 | 0,00007 | NM_006332    | MITF          |
| 8080938 | 1,84 | 3,58 | 0,03546 | 1,65  | 3,15  | 0,00054 | NM_198159    | AHCTF1        |
| 7925622 | 1,84 | 3,58 | 0,01418 | 2,91  | 7,54  | 0,00241 | NM_015446    | TRANK1        |
| 8086125 | 1,84 | 3,58 | 0,02553 | 1,80  | 3,49  | 0,00113 | NM_014831    | CST2          |
| 8065416 | 1,84 | 3,58 | 0,00741 | -1,87 | -3,65 | 0,00110 | NM_001322    | PIP4K2B       |
| 8014723 | 1,84 | 3,58 | 0,01911 | 3,02  | 8,12  | 0,00025 | NM_003559    | GGNBP2        |
| 8006638 | 1,84 | 3,58 | 0,01140 | 3,00  | 8,02  | 0,00086 | NM_024835    | ZMYND8        |
| 8066786 | 1,84 | 3,58 | 0,00014 | 2,32  | 5,01  | 0,01010 | NM_183047    | ---           |
| 8165644 | 1,84 | 3,57 | 0,14027 | -1,78 | -3,43 | 0,00052 | ---          | RAD18         |
| 8085145 | 1,84 | 3,57 | 0,00264 | 2,38  | 5,21  | 0,00387 | NM_020165    | PARP6         |
| 7990165 | 1,84 | 3,57 | 0,02345 | 4,13  | 17,56 | 0,00009 | NM_020214    | ERAP2         |
| 8107044 | 1,84 | 3,57 | 0,08668 | 1,93  | 3,80  | 0,00769 | NM_022350    | DDIT4         |
| 7928308 | 1,83 | 3,57 | 0,01028 | 1,50  | 2,83  | 0,03635 | NM_019058    | SCFD2         |
| 8100347 | 1,83 | 3,57 | 0,00453 | 1,46  | 2,75  | 0,02502 | NM_152540    | MFN2          |
| 7897824 | 1,83 | 3,56 | 0,00262 | 2,28  | 4,87  | 0,00021 | NM_014874    | SLC30A4       |
| 7988426 | 1,83 | 3,56 | 0,03504 | 2,47  | 5,53  | 0,00606 | NM_013309    | RPL23AP7      |
| 8054762 | 1,83 | 3,56 | 0,00746 | 0,53  | 1,45  | 0,08764 | NR_024528    | NIPA2         |
| 7986665 | 1,83 | 3,56 | 0,00206 | 3,41  | 10,62 | 0,00039 | NM_030922    | ATF7          |
| 7963698 | 1,83 | 3,56 | 0,00410 | 1,84  | 3,59  | 0,00167 | NM_001130059 | PAIP1         |
| 8005473 | 1,83 | 3,56 | 0,06720 | 1,45  | 2,73  | 0,02398 | NM_006451    | USP31         |
| 8000244 | 1,83 | 3,56 | 0,10548 | 2,17  | 4,50  | 0,00194 | NM_020718    | RNPEP         |
| 7908779 | 1,83 | 3,55 | 0,00808 | 3,02  | 8,08  | 0,00342 | NM_020216    | RPL13A        |
| 8030351 | 1,83 | 3,55 | 0,07564 | 2,65  | 6,29  | 0,01163 | NM_012423    | TOX           |
| 8150962 | 1,83 | 3,55 | 0,01278 | -0,33 | -1,26 | 0,06792 | NM_014729    | STON1-GTF2A1L |
| 8041940 | 1,83 | 3,55 | 0,01547 | -0,21 | -1,16 | 0,29963 | NM_172311    | ARHGAP12      |
| 7932885 | 1,83 | 3,55 | 0,01369 | 2,51  | 5,70  | 0,00104 | NM_018287    | TMED7         |
| 8113623 | 1,83 | 3,55 | 0,01642 | 1,55  | 2,93  | 0,00495 | NM_181836    | CDK4          |
| 7964522 | 1,83 | 3,55 | 0,13221 | 4,34  | 20,27 | 0,00039 | NM_000075    | IMPDH2        |
| 8087254 | 1,83 | 3,55 | 0,02894 | 2,26  | 4,80  | 0,00589 | NM_000884    | COL4A3BP      |
| 8112687 | 1,83 | 3,55 | 0,03809 | 1,66  | 3,17  | 0,01521 | NM_005713    | GTF2E1        |
| 8081953 | 1,83 | 3,55 | 0,02034 | 1,24  | 2,37  | 0,03495 | NM_005513    | ALDH7A1       |
| 8113773 | 1,83 | 3,55 | 0,08207 | 2,31  | 4,95  | 0,02822 | NM_001182    | SHISA5        |
| 8086953 | 1,83 | 3,55 | 0,00546 | 2,36  | 5,15  | 0,00663 | NM_016479    | SMC1A         |
| 8172876 | 1,83 | 3,54 | 0,00280 | 2,66  | 6,30  | 0,00000 | NM_006306    | DCLK1         |
| 7970954 | 1,83 | 3,54 | 0,07875 | -0,60 | -1,52 | 0,10409 | NM_004734    | PALB2         |
| 8000329 | 1,82 | 3,54 | 0,00897 | 2,38  | 5,20  | 0,00938 | NM_024675    | ANKRD27       |
| 8035905 | 1,82 | 3,54 | 0,00455 | 2,77  | 6,83  | 0,00144 | NM_032139    | POLE2         |
| 7978846 | 1,82 | 3,54 | 0,00774 | 4,12  | 17,40 | 0,00051 | NM_002692    | IK            |
| 8108568 | 1,82 | 3,54 | 0,00688 | 1,33  | 2,52  | 0,00022 | NM_006083    | PHLDA1        |
| 7965040 | 1,82 | 3,54 | 0,01932 | 2,32  | 4,98  | 0,00261 | NM_007350    | NEK9          |
| 7980271 | 1,82 | 3,54 | 0,03186 | 3,63  | 12,34 | 0,00050 | NM_033116    | SLC25A40      |
| 8140814 | 1,82 | 3,54 | 0,03581 | 3,97  | 15,65 | 0,00004 | NM_018843    | ECM1          |
| 7905220 | 1,82 | 3,54 | 0,06762 | 0,83  | 1,77  | 0,10452 | NM_004425    | SLC35B3       |
| 8123825 | 1,82 | 3,54 | 0,01613 | 1,43  | 2,70  | 0,04249 | NM_015948    | MORF4L1       |
| 7985226 | 1,82 | 3,53 | 0,00206 | 3,16  | 8,96  | 0,00612 | NM_206839    | PPAT          |
| 8100495 | 1,82 | 3,53 | 0,03809 | 3,43  | 10,79 | 0,00024 | NM_002703    | IPO9          |
| 7908732 | 1,82 | 3,53 | 0,02353 | 3,29  | 9,75  | 0,00009 | NM_018085    | CTTN          |
| 7942204 | 1,82 | 3,53 | 0,01440 | 3,25  | 9,51  | 0,00342 | NM_005231    | HNRPLL        |
| 8051605 | 1,82 | 3,53 | 0,01508 | 2,01  | 4,02  | 0,01661 | NM_138394    | COMMD8        |
| 8100145 | 1,82 | 3,53 | 0,05835 | 1,99  | 3,98  | 0,01064 | NM_017845    | RIPK1         |
| 8116622 | 1,82 | 3,53 | 0,01994 | 1,65  | 3,14  | 0,00205 | NM_003804    | NT5DC1        |
| 8121578 | 1,82 | 3,53 | 0,01334 | 1,60  | 3,04  | 0,00026 | NM_152729    | MARK3         |
| 7977077 | 1,82 | 3,53 | 0,02667 | 2,94  | 7,70  | 0,00011 | NM_001128918 | CEP170L       |
| 8097058 | 1,82 | 3,52 | 0,07359 | 1,64  | 3,13  | 0,01407 | NR_003135    | ABCC5         |
| 8092418 | 1,82 | 3,52 | 0,00488 | 2,69  | 6,44  | 0,00012 | NM_005688    | C6orf225      |
| 8121547 | 1,82 | 3,52 | 0,07578 | 0,16  | 1,12  | 0,52836 | NM_001033564 | MAP9          |
| 8103341 | 1,82 | 3,52 | 0,00090 | -0,61 | -1,53 | 0,06759 | NM_001039580 | PHF5A         |
| 8076339 | 1,81 | 3,52 | 0,01114 | 3,00  | 8,01  | 0,00582 | NM_032758    | ARF5          |
| 8135856 | 1,81 | 3,52 | 0,05509 | 2,65  | 6,30  | 0,00500 | NM_001662    | ZNF462        |
| 8157105 | 1,81 | 3,52 | 0,01350 | 2,66  | 6,32  | 0,00003 | NM_021224    | TRIM22        |
| 7938035 | 1,81 | 3,51 | 0,00609 | -0,70 | -1,63 | 0,02133 | NM_006074    | PDS5B         |
| 7968516 | 1,81 | 3,51 | 0,00591 | 2,04  | 4,10  | 0,00520 | NM_015032    | CTPS          |
| 7900510 | 1,81 | 3,51 | 0,00853 | 1,75  | 3,37  | 0,00082 | NM_001905    | SNORD80       |
| 7922404 | 1,81 | 3,51 | 0,00173 | -2,79 | -6,91 | 0,21371 | NR_003940    | TOMM34        |
| 8066461 | 1,81 | 3,51 | 0,00260 | 3,24  | 9,47  | 0,00003 | NM_006809    | SCMH1         |
| 7915363 | 1,81 | 3,51 | 0,02670 | 2,65  | 6,26  | 0,00039 | NM_001031694 | RPS18         |
| 8118644 | 1,81 | 3,51 | 0,05926 | 0,83  | 1,77  | 0,00513 | NM_022551    | RPS18         |
| 8178253 | 1,81 | 3,51 | 0,05926 | 0,83  | 1,77  | 0,00513 | NM_022551    | RPS18         |

|         |      |      |         |       |       |         |              |           |
|---------|------|------|---------|-------|-------|---------|--------------|-----------|
| 8179544 | 1,81 | 3,51 | 0,05926 | 0,83  | 1,77  | 0,00513 | NM_022551    | INPP5K    |
| 8011062 | 1,81 | 3,51 | 0,00383 | 1,98  | 3,94  | 0,00004 | NM_130766    | RPL21P28  |
| 7924144 | 1,81 | 3,51 | 0,15554 | 0,59  | 1,50  | 0,12216 | NR_026911    | FAM116A   |
| 8088348 | 1,81 | 3,50 | 0,00058 | 2,38  | 5,19  | 0,00009 | NM_152678    | DDX3Y     |
| 8176624 | 1,81 | 3,50 | 0,01847 | 2,42  | 5,35  | 0,00001 | NM_001122665 | C1orf103  |
| 7918467 | 1,81 | 3,50 | 0,02250 | 3,14  | 8,84  | 0,00280 | NM_018372    | C17orf75  |
| 8014100 | 1,81 | 3,50 | 0,01265 | 2,88  | 7,34  | 0,00293 | NM_022344    | NIPSNAP1  |
| 8075263 | 1,81 | 3,50 | 0,01084 | 3,30  | 9,82  | 0,00021 | NM_003634    | SPATS2    |
| 7955217 | 1,81 | 3,50 | 0,00608 | 4,17  | 18,04 | 0,00001 | NM_023071    | BCL9      |
| 7904907 | 1,80 | 3,49 | 0,00475 | 1,90  | 3,74  | 0,00149 | NM_004326    | GTPBP2    |
| 8126629 | 1,80 | 3,49 | 0,03200 | 5,10  | 34,30 | 0,00010 | NM_019096    | ---       |
| 8097443 | 1,80 | 3,49 | 0,00225 | 0,79  | 1,72  | 0,13249 | ---          | RPS6KA6   |
| 8173825 | 1,80 | 3,49 | 0,01702 | 2,53  | 5,77  | 0,00078 | NM_014496    | CENPF     |
| 7909708 | 1,80 | 3,49 | 0,00395 | 1,66  | 3,16  | 0,11135 | NM_016343    | ACAT2     |
| 8123137 | 1,80 | 3,49 | 0,00960 | 1,96  | 3,88  | 0,00587 | NM_005891    | NUP37     |
| 7965855 | 1,80 | 3,49 | 0,02003 | 2,76  | 6,78  | 0,00074 | NM_024057    | PANK3     |
| 8115681 | 1,80 | 3,49 | 0,03976 | 2,19  | 4,57  | 0,00278 | NM_024594    | ADNP2     |
| 8021914 | 1,80 | 3,48 | 0,04978 | 3,00  | 8,00  | 0,00227 | NM_014913    | TFB1M     |
| 8130438 | 1,80 | 3,48 | 0,02519 | 1,78  | 3,43  | 0,00158 | NM_016020    | MKNK2     |
| 8032392 | 1,80 | 3,48 | 0,00743 | 3,24  | 9,43  | 0,00250 | NM_199054    | SMN1      |
| 8105958 | 1,80 | 3,48 | 0,00102 | 2,50  | 5,67  | 0,00059 | NM_000344    | SMN1      |
| 8177647 | 1,80 | 3,48 | 0,00102 | 2,50  | 5,67  | 0,00059 | NM_000344    | ZNF800    |
| 8142730 | 1,80 | 3,48 | 0,03792 | 0,05  | 1,04  | 0,82926 | NM_176814    | NANS      |
| 8156761 | 1,80 | 3,48 | 0,01131 | 3,60  | 12,09 | 0,00018 | NM_018946    | CREB5     |
| 8131996 | 1,80 | 3,48 | 0,02569 | 1,35  | 2,54  | 0,01540 | NM_182898    | RASA2     |
| 8083094 | 1,80 | 3,48 | 0,08558 | 2,88  | 7,35  | 0,00119 | NM_006506    | FAM26E    |
| 8121601 | 1,80 | 3,48 | 0,08856 | -0,39 | -1,31 | 0,27893 | NM_153711    | VOPP1     |
| 8139712 | 1,80 | 3,47 | 0,00905 | 1,16  | 2,23  | 0,01181 | NM_030796    | MTF1      |
| 7915091 | 1,80 | 3,47 | 0,03529 | 2,06  | 4,17  | 0,00065 | NM_005955    | PKD2      |
| 8096314 | 1,80 | 3,47 | 0,02344 | 2,16  | 4,48  | 0,00003 | NM_000297    | EBNA1BP2  |
| 7915485 | 1,80 | 3,47 | 0,06644 | 3,10  | 8,55  | 0,00004 | NM_006824    | SNORD33   |
| 8030362 | 1,80 | 3,47 | 0,01905 | -2,80 | -6,94 | 0,15326 | NR_000020    | LMO3      |
| 7961580 | 1,80 | 3,47 | 0,01066 | 4,01  | 16,15 | 0,00516 | NM_018640    | C5orf28   |
| 8111952 | 1,79 | 3,47 | 0,01007 | 2,47  | 5,54  | 0,00298 | NM_022483    | H2AFY     |
| 8114225 | 1,79 | 3,47 | 0,00372 | 2,83  | 7,12  | 0,00001 | NM_004893    | FBXL20    |
| 8014825 | 1,79 | 3,46 | 0,04114 | 3,99  | 15,86 | 0,00001 | NM_032875    | FAM117B   |
| 8047565 | 1,79 | 3,46 | 0,05586 | 1,98  | 3,94  | 0,00428 | NM_173511    | EPT1      |
| 8040655 | 1,79 | 3,46 | 0,02688 | 3,65  | 12,59 | 0,00018 | NM_033505    | ZDHHC17   |
| 7957277 | 1,79 | 3,46 | 0,05009 | 2,26  | 4,78  | 0,00450 | NM_015336    | KIDINS220 |
| 8050128 | 1,79 | 3,46 | 0,05340 | 2,70  | 6,50  | 0,00011 | NM_020738    | MRPL28    |
| 7998222 | 1,79 | 3,46 | 0,01006 | 2,06  | 4,16  | 0,00213 | NM_006428    | IFI6      |
| 7914127 | 1,79 | 3,46 | 0,00171 | 1,89  | 3,71  | 0,01234 | NM_002038    | CHM       |
| 8173892 | 1,79 | 3,46 | 0,00622 | 1,39  | 2,62  | 0,01767 | NM_000390    | RPRD1A    |
| 8022914 | 1,79 | 3,45 | 0,06136 | 3,98  | 15,73 | 0,00010 | NM_018170    | AAGAB     |
| 7989953 | 1,79 | 3,45 | 0,06193 | 2,53  | 5,77  | 0,00201 | NM_024666    | SLC25A24  |
| 7918188 | 1,79 | 3,45 | 0,01082 | 1,50  | 2,83  | 0,00053 | NM_013386    | ---       |
| 8166948 | 1,79 | 3,45 | 0,02557 | 0,45  | 1,36  | 0,33466 | ---          | NAPA      |
| 8037913 | 1,79 | 3,45 | 0,00492 | 0,68  | 1,60  | 0,01342 | NM_003827    | LEPREL1   |
| 8092707 | 1,78 | 3,45 | 0,01225 | 2,85  | 7,20  | 0,01253 | NM_018192    | PIGM      |
| 7921526 | 1,78 | 3,45 | 0,01974 | 2,73  | 6,65  | 0,00004 | NM_145167    | KPNA5     |
| 8121632 | 1,78 | 3,44 | 0,12547 | 3,18  | 9,09  | 0,00312 | NM_002269    | DNTTIP1   |
| 8063028 | 1,78 | 3,44 | 0,03675 | 2,98  | 7,89  | 0,00154 | NM_052951    | TMEM51    |
| 7898115 | 1,78 | 3,44 | 0,02793 | 2,39  | 5,23  | 0,00088 | NM_001136218 | UCK1      |
| 8164653 | 1,78 | 3,44 | 0,03343 | 4,30  | 19,63 | 0,00009 | NM_031432    | LACTB     |
| 7984103 | 1,78 | 3,44 | 0,03511 | 1,61  | 3,05  | 0,00005 | NM_032857    | HEATR6    |
| 8017186 | 1,78 | 3,44 | 0,10840 | 2,96  | 7,80  | 0,00075 | NM_022070    | TMEM120A  |
| 8140371 | 1,78 | 3,44 | 0,02251 | 1,03  | 2,05  | 0,05597 | NM_031925    | C10orf118 |
| 7936419 | 1,78 | 3,44 | 0,00676 | 2,20  | 4,59  | 0,00737 | NM_018017    | SCAMP2    |
| 7990417 | 1,78 | 3,44 | 0,03179 | 3,59  | 12,00 | 0,00164 | NM_005697    | HIVEP1    |
| 8116910 | 1,78 | 3,44 | 0,00577 | 2,06  | 4,17  | 0,00879 | NM_002114    | EBF1      |
| 8115543 | 1,78 | 3,44 | 0,05436 | -1,09 | -2,13 | 0,01002 | NM_024007    | YIF1A     |
| 7949577 | 1,78 | 3,44 | 0,11122 | 3,75  | 13,42 | 0,00394 | NM_020470    | CAPRN2    |
| 7962112 | 1,78 | 3,44 | 0,01292 | 1,37  | 2,58  | 0,00146 | NM_001002259 | GYG2      |
| 8165817 | 1,78 | 3,44 | 0,00175 | 0,30  | 1,23  | 0,63744 | NM_001079855 | NCOA7     |
| 8121861 | 1,78 | 3,44 | 0,01523 | 2,33  | 5,02  | 0,00769 | NM_181782    | ---       |
| 8165663 | 1,78 | 3,43 | 0,09660 | -1,41 | -2,66 | 0,24169 | ---          | DOK5      |
| 8063458 | 1,78 | 3,43 | 0,01034 | -0,91 | -1,87 | 0,00245 | NM_018431    | VWTR1     |
| 8091422 | 1,78 | 3,43 | 0,01730 | 1,58  | 2,99  | 0,00312 | NM_001168278 | COL6A1    |
| 8069269 | 1,78 | 3,43 | 0,00219 | 1,16  | 2,24  | 0,05417 | NM_001848    | CIRBP     |
| 8024238 | 1,78 | 3,42 | 0,04978 | 2,68  | 6,43  | 0,00089 | NM_001280    | ANAPC1    |
| 8043349 | 1,77 | 3,42 | 0,00119 | 3,51  | 11,36 | 0,00574 | NM_022662    | TLK2      |
| 8009014 | 1,77 | 3,42 | 0,00337 | 1,75  | 3,37  | 0,00000 | NM_006852    | GLIS3     |
| 8159900 | 1,77 | 3,42 | 0,00753 | 2,45  | 5,47  | 0,00036 | NM_152629    | TRERF1    |

|         |      |      |         |      |       |         |              |           |
|---------|------|------|---------|------|-------|---------|--------------|-----------|
| 8126428 | 1,77 | 3,42 | 0,05554 | 1,70 | 3,24  | 0,02718 | NM_033502    | LAMB2     |
| 8087337 | 1,77 | 3,42 | 0,00465 | 2,82 | 7,05  | 0,00090 | NM_002292    | SNRNP200  |
| 8053909 | 1,77 | 3,42 | 0,02576 | 2,87 | 7,33  | 0,00057 | NM_014014    | C3orf23   |
| 8079170 | 1,77 | 3,42 | 0,00173 | 1,31 | 2,47  | 0,01019 | NM_173826    | ASB8      |
| 7962783 | 1,77 | 3,41 | 0,06477 | 2,34 | 5,07  | 0,00101 | NM_024095    | USP18     |
| 8074606 | 1,77 | 3,41 | 0,05682 | 2,77 | 6,84  | 0,00182 | NM_017414    | EIF2AK3   |
| 8053668 | 1,77 | 3,41 | 0,02426 | 1,49 | 2,82  | 0,00386 | NM_004836    | TPM3      |
| 8142468 | 1,77 | 3,41 | 0,19784 | 2,88 | 7,34  | 0,01602 | NM_153649    | BLOC1S2   |
| 7935746 | 1,77 | 3,41 | 0,08141 | 1,52 | 2,87  | 0,03943 | NM_001001342 | MAPKAPK2  |
| 7909236 | 1,77 | 3,41 | 0,02252 | 2,24 | 4,73  | 0,00098 | NM_004759    | DUSP3     |
| 8015835 | 1,77 | 3,41 | 0,07243 | 3,13 | 8,74  | 0,00035 | NM_004090    | TADA2B    |
| 8093993 | 1,77 | 3,41 | 0,05822 | 3,35 | 10,21 | 0,00000 | NM_152293    | LRRFIP1   |
| 8049544 | 1,77 | 3,41 | 0,00782 | 0,27 | 1,21  | 0,25084 | NM_001137550 | KDM4A     |
| 7900833 | 1,77 | 3,40 | 0,09021 | 3,31 | 9,91  | 0,00025 | NM_014663    | PLK3      |
| 7901054 | 1,77 | 3,40 | 0,04164 | 0,65 | 1,56  | 0,13271 | NM_004073    | RNLS      |
| 7934885 | 1,77 | 3,40 | 0,00443 | 3,83 | 14,17 | 0,00017 | NM_018363    | ZNF845    |
| 8030978 | 1,76 | 3,40 | 0,00493 | 2,98 | 7,89  | 0,00005 | NM_138374    | TMEM159   |
| 7993807 | 1,76 | 3,39 | 0,00594 | 1,57 | 2,97  | 0,00234 | NM_020422    | ACAD11    |
| 8090715 | 1,76 | 3,39 | 0,01938 | 1,81 | 3,50  | 0,02256 | NM_032169    | PPIL2     |
| 8071566 | 1,76 | 3,39 | 0,02189 | 2,67 | 6,36  | 0,00008 | NM_014337    | TDRD7     |
| 8156688 | 1,76 | 3,39 | 0,00819 | 2,85 | 7,19  | 0,00052 | NM_014290    | SCOC      |
| 8097521 | 1,76 | 3,39 | 0,03251 | 1,97 | 3,91  | 0,02528 | NM_032547    | CLEC16A   |
| 7993223 | 1,76 | 3,39 | 0,01525 | 2,65 | 6,28  | 0,00670 | NM_015226    | TMEM50B   |
| 8070083 | 1,76 | 3,39 | 0,01358 | 3,19 | 9,14  | 0,00059 | NM_006134    | NUCB1     |
| 8030133 | 1,76 | 3,39 | 0,00180 | 1,38 | 2,61  | 0,06943 | NM_006184    | SFRS12IP1 |
| 8112337 | 1,76 | 3,39 | 0,05623 | 1,68 | 3,21  | 0,01834 | NM_173829    | PDK2      |
| 8008263 | 1,76 | 3,39 | 0,02003 | 2,78 | 6,88  | 0,00373 | NM_002611    | PCGF6     |
| 8027330 | 1,76 | 3,39 | 0,04123 | 2,99 | 7,96  | 0,00016 | NM_001011663 | C10orf84  |
| 7936578 | 1,76 | 3,39 | 0,01315 | 1,90 | 3,73  | 0,01205 | NM_022063    | EIF4G1    |
| 8084439 | 1,76 | 3,39 | 0,00700 | 2,13 | 4,38  | 0,00689 | NM_182917    | TAPBP     |
| 8180166 | 1,76 | 3,38 | 0,00052 | 1,76 | 3,38  | 0,02256 | NM_003190    | RBBP5     |
| 7923712 | 1,76 | 3,38 | 0,01521 | 1,89 | 3,72  | 0,00027 | NM_005057    | COX15     |
| 7935647 | 1,76 | 3,38 | 0,06571 | 3,12 | 8,68  | 0,00006 | NM_078470    | UBAP2     |
| 8160722 | 1,76 | 3,38 | 0,02715 | 2,91 | 7,49  | 0,00176 | NM_018449    | ANGEL2    |
| 7924190 | 1,76 | 3,38 | 0,00604 | 2,23 | 4,68  | 0,00036 | NM_144567    | ARHGAP23  |
| 8006779 | 1,76 | 3,38 | 0,00450 | 1,29 | 2,45  | 0,06019 | NM_020876    | SLC35A1   |
| 8121031 | 1,76 | 3,38 | 0,01526 | 2,84 | 7,16  | 0,00042 | NM_006416    | AADAT     |
| 8103706 | 1,75 | 3,37 | 0,00900 | 2,49 | 5,63  | 0,00143 | NM_016228    | PEX3      |
| 8122409 | 1,75 | 3,37 | 0,04115 | 1,40 | 2,63  | 0,02512 | NM_003630    | CCDC55    |
| 8006112 | 1,75 | 3,37 | 0,02568 | 2,56 | 5,91  | 0,00468 | NM_032141    | NUP214    |
| 8158783 | 1,75 | 3,37 | 0,03784 | 3,38 | 10,42 | 0,00002 | NM_005085    | ZNF625    |
| 8034342 | 1,75 | 3,37 | 0,16356 | 1,85 | 3,60  | 0,01759 | AK292455     | MEGF9     |
| 8163775 | 1,75 | 3,37 | 0,01170 | 3,65 | 12,59 | 0,00015 | NM_001080497 | PKDCC     |
| 8041582 | 1,75 | 3,37 | 0,07283 | 0,44 | 1,35  | 0,44033 | NM_138370    | MYLIP     |
| 8117020 | 1,75 | 3,37 | 0,03281 | 3,51 | 11,41 | 0,00048 | NM_013262    | RPL17     |
| 7902448 | 1,75 | 3,37 | 0,00453 | 1,01 | 2,02  | 0,04945 | NM_000985    | PTPRJ     |
| 7939839 | 1,75 | 3,37 | 0,05200 | 2,13 | 4,38  | 0,00049 | NM_002843    | CYP20A1   |
| 8047641 | 1,75 | 3,37 | 0,01959 | 1,37 | 2,59  | 0,01584 | NM_177538    | CBWD3     |
| 8161537 | 1,75 | 3,37 | 0,00215 | 1,91 | 3,76  | 0,00087 | NM_201453    | TCEA1     |
| 8150818 | 1,75 | 3,37 | 0,02079 | 3,20 | 9,20  | 0,00589 | NM_006756    | TRIM32    |
| 8157516 | 1,75 | 3,36 | 0,00963 | 1,86 | 3,62  | 0,01811 | NM_012210    | ABI2      |
| 8047659 | 1,75 | 3,36 | 0,01232 | 3,46 | 10,99 | 0,00035 | NM_005759    | RINT1     |
| 8135323 | 1,75 | 3,36 | 0,06817 | 2,44 | 5,41  | 0,00023 | NM_021930    | CABYR     |
| 8020653 | 1,75 | 3,36 | 0,01587 | 2,61 | 6,10  | 0,00076 | NM_012189    | BRWD3     |
| 8173766 | 1,75 | 3,36 | 0,01088 | 3,04 | 8,20  | 0,00001 | NM_153252    | NARS2     |
| 7950683 | 1,75 | 3,36 | 0,01867 | 3,94 | 15,31 | 0,00034 | NM_024678    | FAM190B   |
| 7928800 | 1,75 | 3,36 | 0,01271 | 2,53 | 5,78  | 0,00187 | NM_018999    | PAXIP1    |
| 8144047 | 1,75 | 3,36 | 0,00101 | 2,46 | 5,49  | 0,00324 | NM_007349    | FADS3     |
| 7948630 | 1,75 | 3,36 | 0,01413 | 3,52 | 11,46 | 0,00122 | NM_021727    | FGD4      |
| 7954729 | 1,75 | 3,36 | 0,00171 | 1,67 | 3,19  | 0,00237 | NM_139241    | TOR3A     |
| 7907690 | 1,75 | 3,36 | 0,06225 | 3,12 | 8,69  | 0,00000 | NM_022371    | CCDC93    |
| 8054804 | 1,75 | 3,36 | 0,00384 | 2,82 | 7,04  | 0,00024 | NM_019044    | GCLC      |
| 8127158 | 1,75 | 3,35 | 0,08269 | 4,03 | 16,37 | 0,00019 | NM_001498    | HNRPDL    |
| 8101340 | 1,75 | 3,35 | 0,01694 | 1,89 | 3,71  | 0,00170 | NR_003249    | SNUPN     |
| 7990528 | 1,75 | 3,35 | 0,01506 | 3,42 | 10,67 | 0,00010 | NM_005701    | CAMK2G    |
| 7934477 | 1,75 | 3,35 | 0,00669 | 1,65 | 3,15  | 0,00233 | NM_172171    | FNBP4     |
| 7947969 | 1,75 | 3,35 | 0,04400 | 2,83 | 7,10  | 0,00021 | NM_015308    | CDK6      |
| 8140955 | 1,75 | 3,35 | 0,05161 | 0,33 | 1,25  | 0,03075 | NM_001259    | TRPC1     |
| 8083166 | 1,75 | 3,35 | 0,01782 | 2,74 | 6,70  | 0,00125 | NM_003304    | SDHA      |
| 8104166 | 1,75 | 3,35 | 0,03442 | 4,32 | 20,03 | 0,00046 | NM_004168    | HMOX2     |
| 7992987 | 1,74 | 3,35 | 0,01364 | 0,95 | 1,93  | 0,14103 | NM_001127204 | F2R       |
| 8106393 | 1,74 | 3,35 | 0,06097 | 1,18 | 2,27  | 0,01508 | NM_001992    | CDK2AP1   |
| 7967412 | 1,74 | 3,35 | 0,00442 | 2,53 | 5,76  | 0,00119 | NM_004642    | SEPHS1    |

|         |      |      |         |       |       |         |              |           |
|---------|------|------|---------|-------|-------|---------|--------------|-----------|
| 7932109 | 1,74 | 3,35 | 0,20569 | 2,96  | 7,79  | 0,00907 | NM_012247    | TMF1      |
| 8088700 | 1,74 | 3,35 | 0,00556 | 1,36  | 2,56  | 0,00086 | NM_007114    | CAMSAP1   |
| 8165046 | 1,74 | 3,35 | 0,01937 | 2,83  | 7,11  | 0,00066 | NM_015447    | NDUFS1    |
| 8058428 | 1,74 | 3,35 | 0,05778 | 2,52  | 5,75  | 0,00012 | NM_005006    | C20orf194 |
| 8064637 | 1,74 | 3,34 | 0,05714 | 1,39  | 2,62  | 0,00418 | NM_001009984 | DHX36     |
| 8091562 | 1,74 | 3,34 | 0,05408 | 3,88  | 14,69 | 0,00019 | NM_020865    | SREBF2    |
| 8073522 | 1,74 | 3,34 | 0,01278 | 3,65  | 12,59 | 0,00193 | NM_004599    | UBAP1     |
| 8154872 | 1,74 | 3,33 | 0,06368 | 3,19  | 9,10  | 0,00046 | NM_016525    | INO80     |
| 7987584 | 1,74 | 3,33 | 0,02596 | 3,05  | 8,30  | 0,00010 | NM_017553    | ACSS2     |
| 8062041 | 1,74 | 3,33 | 0,00790 | 0,93  | 1,91  | 0,00784 | NM_018677    | NUDT7     |
| 7997332 | 1,74 | 3,33 | 0,05054 | 1,16  | 2,24  | 0,02374 | NM_001105663 | METTL4    |
| 8022009 | 1,73 | 3,33 | 0,09908 | 4,58  | 24,00 | 0,00015 | NM_022840    | HIST1H4E  |
| 8117402 | 1,73 | 3,33 | 0,14534 | -0,63 | -1,55 | 0,02196 | NM_003545    | FAM122C   |
| 8169995 | 1,73 | 3,33 | 0,03655 | 1,67  | 3,18  | 0,00530 | NM_001170779 | PRKCSH    |
| 8025895 | 1,73 | 3,33 | 0,01867 | 2,90  | 7,45  | 0,00208 | NM_002743    | MYCBP2    |
| 7972069 | 1,73 | 3,33 | 0,01086 | 2,55  | 5,86  | 0,00036 | NM_015057    | RGPD1     |
| 8043324 | 1,73 | 3,32 | 0,01340 | 0,87  | 1,82  | 0,17831 | NM_001024457 | RGPD1     |
| 8053622 | 1,73 | 3,32 | 0,01340 | 0,87  | 1,82  | 0,17831 | NM_001024457 | RNF6      |
| 7970681 | 1,73 | 3,32 | 0,06914 | 2,03  | 4,08  | 0,00114 | NM_005977    | KIAA0652  |
| 7939676 | 1,73 | 3,32 | 0,01370 | 2,75  | 6,73  | 0,00008 | NR_024587    | PRDM4     |
| 7966072 | 1,73 | 3,32 | 0,02017 | 2,24  | 4,72  | 0,00078 | NM_012406    | SFRS15    |
| 8069910 | 1,73 | 3,32 | 0,02333 | 3,59  | 12,04 | 0,00042 | NM_020706    | MUDENG    |
| 7974566 | 1,73 | 3,32 | 0,01229 | 2,03  | 4,10  | 0,00772 | NM_018229    | MYO5A     |
| 7988921 | 1,73 | 3,32 | 0,01223 | 2,68  | 6,40  | 0,00114 | NM_000259    | DTNA      |
| 8020847 | 1,73 | 3,32 | 0,00285 | 0,55  | 1,46  | 0,14031 | NM_001390    | 14. Sep   |
| 7896742 | 1,73 | 3,31 | 0,15309 | 1,43  | 2,69  | 0,40078 | NM_207366    | 14. Sep   |
| 7911347 | 1,73 | 3,31 | 0,15309 | 1,43  | 2,69  | 0,40078 | NM_207366    | 14. Sep   |
| 7945342 | 1,73 | 3,31 | 0,15309 | 1,43  | 2,69  | 0,40078 | NM_207366    | 14. Sep   |
| 8031990 | 1,73 | 3,31 | 0,15309 | 1,43  | 2,69  | 0,40078 | NM_207366    | 14. Sep   |
| 8085054 | 1,73 | 3,31 | 0,15309 | 1,43  | 2,69  | 0,40078 | NM_207366    | 14. Sep   |
| 8110670 | 1,73 | 3,31 | 0,15309 | 1,43  | 2,69  | 0,40078 | NM_207366    | 14. Sep   |
| 8137666 | 1,73 | 3,31 | 0,15309 | 1,43  | 2,69  | 0,40078 | NM_207366    | 14. Sep   |
| 8148964 | 1,73 | 3,31 | 0,15309 | 1,43  | 2,69  | 0,40078 | NM_207366    | BMP2K     |
| 8096004 | 1,73 | 3,31 | 0,03088 | 1,34  | 2,53  | 0,00363 | NM_198892    | CLIP1     |
| 7967255 | 1,73 | 3,31 | 0,01951 | 2,09  | 4,27  | 0,00104 | NM_002956    | CD55      |
| 7909332 | 1,73 | 3,31 | 0,00614 | 2,25  | 4,75  | 0,00178 | NM_001114752 | UQCRH     |
| 7912670 | 1,73 | 3,31 | 0,04788 | 2,54  | 5,83  | 0,00360 | NM_006004    | NAV1      |
| 7908694 | 1,73 | 3,31 | 0,01523 | 2,29  | 4,89  | 0,00012 | NM_020443    | SHFM1     |
| 8141133 | 1,73 | 3,31 | 0,01014 | 1,28  | 2,43  | 0,04475 | NM_006304    | EIF1AY    |
| 8176719 | 1,73 | 3,31 | 0,06066 | 2,59  | 6,04  | 0,00450 | NM_004681    | LMBRD1    |
| 8127425 | 1,72 | 3,31 | 0,09030 | 3,24  | 9,42  | 0,00064 | NM_018368    | SLC16A2   |
| 8168424 | 1,72 | 3,31 | 0,03673 | 0,95  | 1,93  | 0,01900 | NM_006517    | ATP5F1    |
| 7903972 | 1,72 | 3,30 | 0,00085 | 0,82  | 1,76  | 0,00436 | NM_001688    | KIAA0564  |
| 7971246 | 1,72 | 3,30 | 0,00375 | 2,67  | 6,36  | 0,00044 | NM_015058    | ZNF490    |
| 8034408 | 1,72 | 3,30 | 0,05850 | 1,39  | 2,61  | 0,00037 | NM_020714    | AKAP13    |
| 7985695 | 1,72 | 3,30 | 0,00203 | 2,12  | 4,34  | 0,00229 | NM_006738    | KATNAL1   |
| 7970844 | 1,72 | 3,30 | 0,04842 | 1,77  | 3,40  | 0,00366 | NM_001014380 | ATG9A     |
| 8059139 | 1,72 | 3,30 | 0,01882 | 2,46  | 5,51  | 0,00133 | NM_001077198 | VWASA     |
| 7944803 | 1,72 | 3,29 | 0,00866 | 0,15  | 1,11  | 0,68031 | NM_001130142 | SPAST     |
| 8041236 | 1,72 | 3,29 | 0,01630 | 2,59  | 6,03  | 0,00333 | NM_014946    | TBCCD1    |
| 8092627 | 1,72 | 3,29 | 0,03467 | 2,36  | 5,13  | 0,02183 | NM_018138    | TOPORS    |
| 8160581 | 1,72 | 3,29 | 0,00175 | 1,28  | 2,42  | 0,01528 | NM_005802    | VPSS4     |
| 8052626 | 1,72 | 3,29 | 0,03075 | 2,57  | 5,93  | 0,00042 | NM_016516    | APIP      |
| 7947490 | 1,72 | 3,29 | 0,00261 | -0,27 | -1,20 | 0,26531 | NM_015957    | CRISPLD1  |
| 8146967 | 1,72 | 3,29 | 0,02105 | 2,00  | 3,99  | 0,00550 | NM_031461    | KIAA1632  |
| 8022996 | 1,72 | 3,29 | 0,05008 | 1,78  | 3,43  | 0,00107 | NM_020964    | GTF2H2    |
| 8105970 | 1,72 | 3,29 | 0,00283 | 2,25  | 4,77  | 0,00121 | NM_001515    | RPP21     |
| 8117881 | 1,72 | 3,28 | 0,18776 | 3,98  | 15,74 | 0,00013 | NM_024839    | PRUNE2    |
| 8161884 | 1,71 | 3,28 | 0,00446 | -0,30 | -1,23 | 0,32014 | NM_015225    | PRC1      |
| 7991406 | 1,71 | 3,28 | 0,02205 | 3,49  | 11,24 | 0,00006 | NM_003981    | C13orf1   |
| 7971644 | 1,71 | 3,28 | 0,00200 | 2,16  | 4,46  | 0,00046 | NM_020456    | BBS7      |
| 8102655 | 1,71 | 3,28 | 0,05050 | 2,80  | 6,95  | 0,00032 | NM_176824    | G6PD      |
| 8176133 | 1,71 | 3,28 | 0,00865 | 2,74  | 6,68  | 0,00020 | NM_000402    | CIAO1     |
| 8043585 | 1,71 | 3,28 | 0,08000 | 3,54  | 11,65 | 0,00378 | NM_004804    | OSTM1     |
| 8128669 | 1,71 | 3,28 | 0,01423 | 1,15  | 2,22  | 0,02796 | NM_014028    | CLIC1     |
| 8125059 | 1,71 | 3,28 | 0,02133 | 2,07  | 4,19  | 0,00423 | NM_001288    | C5orf25   |
| 8110147 | 1,71 | 3,28 | 0,00796 | 1,07  | 2,10  | 0,02793 | NM_198567    | TSPYL1    |
| 8129099 | 1,71 | 3,28 | 0,01113 | 2,81  | 7,03  | 0,00053 | NM_003309    | SDHAP2    |
| 8084912 | 1,71 | 3,27 | 0,00066 | 2,95  | 7,71  | 0,00034 | NR_003265    | NEGR1     |
| 7916986 | 1,71 | 3,27 | 0,00208 | -0,94 | -1,91 | 0,00610 | NM_173808    | GPNPAT1   |
| 7979196 | 1,71 | 3,27 | 0,04280 | 2,54  | 5,82  | 0,00367 | NM_198066    | CCDC76    |
| 7903308 | 1,71 | 3,27 | 0,00116 | 1,47  | 2,78  | 0,04658 | NM_019083    | LARPF6    |
| 7990080 | 1,71 | 3,27 | 0,06635 | 2,62  | 6,15  | 0,00085 | NM_018357    | PFKP      |

|                    |      |      |         |       |       |         |                                     |            |
|--------------------|------|------|---------|-------|-------|---------|-------------------------------------|------------|
| 7925876            | 1,71 | 3,27 | 0,01751 | 3,19  | 9,14  | 0,00008 | NM_002627                           | TTC39B     |
| 8160213            | 1,71 | 3,27 | 0,02226 | 1,71  | 3,27  | 0,01174 | NM_152574                           | IL8        |
| 8095680            | 1,71 | 3,27 | 0,06582 | 0,58  | 1,50  | 0,68863 | NM_000584                           | MXRA5      |
| 8171172            | 1,71 | 3,27 | 0,07083 | -0,70 | -1,62 | 0,14920 | NM_015419                           | SESN3      |
| 7951077            | 1,71 | 3,27 | 0,00982 | -0,13 | -1,10 | 0,47374 | NM_144665                           | H19        |
| 7945680            | 1,71 | 3,26 | 0,00879 | 0,34  | 1,27  | 0,46865 | NR_002196                           | POLB       |
| 8146198            | 1,71 | 3,26 | 0,03664 | 4,26  | 19,19 | 0,00005 | NM_002690                           | RPS6KC1    |
| 7909661            | 1,70 | 3,26 | 0,01646 | 2,78  | 6,89  | 0,00026 | NM_012424                           | ---        |
| 8044189            | 1,70 | 3,26 | 0,00593 | 0,39  | 1,31  | 0,06502 | ---                                 | PPP2CA     |
| 8114158            | 1,70 | 3,26 | 0,07176 | 3,16  | 8,92  | 0,00111 | NM_002715                           | SNRDP2     |
| 8037642            | 1,70 | 3,26 | 0,01607 | 1,18  | 2,27  | 0,05639 | NM_177542                           | STIP1      |
| 7940857            | 1,70 | 3,26 | 0,03282 | 2,70  | 6,51  | 0,00517 | NM_006819                           | TTC8       |
| 7976128            | 1,70 | 3,26 | 0,05427 | 1,97  | 3,92  | 0,00646 | NM_144596                           | EDNRA      |
| 8097692            | 1,70 | 3,26 | 0,06579 | -0,49 | -1,40 | 0,13440 | NM_001957                           | ZFP1       |
| 7997257            | 1,70 | 3,26 | 0,05138 | 1,61  | 3,05  | 0,02581 | NM_153688                           | DNAJB1     |
| 8034837            | 1,70 | 3,26 | 0,02740 | 4,17  | 18,01 | 0,00259 | NM_006145                           | FAM86B1 // |
| FAM86B1 // FAM86B1 |      |      |         |       |       |         |                                     |            |
| 8149389            | 1,70 | 3,25 | 0,00722 | 3,45  | 10,96 | 0,00098 | NR_003494 // NR_003494 // NR_003494 |            |
| DOK4               |      |      |         |       |       |         |                                     |            |
| 8001564            | 1,70 | 3,25 | 0,00380 | 2,29  | 4,91  | 0,00497 | NM_018110                           | ---        |
| 7903183            | 1,70 | 3,25 | 0,00195 | 0,75  | 1,68  | 0,00659 | ---                                 | POM121     |
| 8133275            | 1,70 | 3,25 | 0,00553 | 2,93  | 7,60  | 0,00264 | NM_172020                           | GUSBP3     |
| 8177669            | 1,70 | 3,25 | 0,14161 | 1,73  | 3,32  | 0,01271 | NR_027386                           | PPP3R1     |
| 8052721            | 1,70 | 3,25 | 0,13059 | 3,08  | 8,46  | 0,00002 | NM_000945                           | SSBP1      |
| 8136631            | 1,70 | 3,25 | 0,02664 | 0,98  | 1,97  | 0,01928 | NM_003143                           | POLD3      |
| 7942527            | 1,70 | 3,25 | 0,07656 | 3,34  | 10,11 | 0,00003 | NM_006591                           | ACAD9      |
| 8082444            | 1,70 | 3,25 | 0,05971 | 2,94  | 7,66  | 0,00170 | NM_014049                           | ---        |
| 8103413            | 1,70 | 3,24 | 0,14485 | -0,72 | -1,64 | 0,51483 | ---                                 | MRFAP1     |
| 8093936            | 1,70 | 3,24 | 0,15810 | 1,16  | 2,24  | 0,00013 | NM_033296                           | PLCB4      |
| 8060897            | 1,70 | 3,24 | 0,00459 | 1,38  | 2,61  | 0,00417 | NM_001172646                        | RPL21      |
| 7968226            | 1,70 | 3,24 | 0,22257 | 0,91  | 1,88  | 0,06376 | NM_000982                           | ATL2       |
| 8051589            | 1,70 | 3,24 | 0,03737 | 2,70  | 6,50  | 0,00144 | NM_022374                           | MLX        |
| 8007290            | 1,69 | 3,24 | 0,00054 | 2,14  | 4,41  | 0,00068 | NM_170607                           | NAV2       |
| 7938834            | 1,69 | 3,24 | 0,03127 | 0,16  | 1,12  | 0,68451 | NM_182964                           | WHSC1L1    |
| 8150287            | 1,69 | 3,24 | 0,01802 | 3,23  | 9,35  | 0,00399 | NM_023034                           | WDYHV1     |
| 8148198            | 1,69 | 3,24 | 0,06442 | 3,28  | 9,75  | 0,00024 | NM_018024                           | GLYR1      |
| 7999233            | 1,69 | 3,24 | 0,00653 | 1,79  | 3,45  | 0,00907 | NM_032569                           | AFF1       |
| 8096224            | 1,69 | 3,23 | 0,03791 | 2,54  | 5,80  | 0,00495 | NM_001166693                        | ERL3       |
| 7915567            | 1,69 | 3,23 | 0,02123 | 1,99  | 3,98  | 0,00012 | NM_024066                           | EID1       |
| 7983606            | 1,69 | 3,23 | 0,06902 | 1,69  | 3,22  | 0,00087 | NM_014335                           | KIAA1147   |
| 8143441            | 1,69 | 3,23 | 0,01210 | 3,25  | 9,49  | 0,00006 | NM_001080392                        | C1orf52    |
| 7917331            | 1,69 | 3,23 | 0,02161 | 1,63  | 3,10  | 0,00631 | NR_024113                           | SNX14      |
| 8127943            | 1,69 | 3,23 | 0,03887 | 3,46  | 11,00 | 0,00111 | NM_153816                           | TSKU       |
| 7942674            | 1,69 | 3,23 | 0,01441 | 2,36  | 5,13  | 0,00628 | NM_015516                           | GFPT2      |
| 8116418            | 1,69 | 3,23 | 0,01273 | 2,03  | 4,07  | 0,01536 | NM_005110                           | MRPL21     |
| 7949995            | 1,69 | 3,23 | 0,00158 | 2,13  | 4,37  | 0,01902 | NM_181515                           | RAB3A      |
| 8035398            | 1,69 | 3,23 | 0,05561 | 3,08  | 8,46  | 0,00142 | NM_002866                           | DNAJC8     |
| 7914194            | 1,69 | 3,23 | 0,06810 | 3,13  | 8,74  | 0,00265 | NM_014280                           | SUPT4H1    |
| 8016982            | 1,69 | 3,23 | 0,05541 | 2,62  | 6,16  | 0,00102 | NM_003168                           | NPR2       |
| 8155121            | 1,69 | 3,23 | 0,00175 | -0,68 | -1,61 | 0,00495 | NM_003995                           | ---        |
| 8101210            | 1,69 | 3,22 | 0,00170 | 0,45  | 1,37  | 0,17655 | ---                                 | RFWD2      |
| 7922504            | 1,69 | 3,22 | 0,14200 | 3,88  | 14,73 | 0,00010 | NM_022457                           | ERCC6      |
| 7933509            | 1,69 | 3,22 | 0,00425 | 0,98  | 1,98  | 0,01056 | NM_000124                           | RPL21      |
| 8131661            | 1,69 | 3,22 | 0,19904 | 0,52  | 1,43  | 0,16676 | NM_000982                           | ZNF827     |
| 8103025            | 1,69 | 3,22 | 0,01532 | 1,86  | 3,64  | 0,01688 | NM_178835                           | PRR11      |
| 8008784            | 1,69 | 3,22 | 0,01922 | 3,74  | 13,32 | 0,00014 | NM_018304                           | AIMP2      |
| 8131374            | 1,69 | 3,22 | 0,01596 | 3,26  | 9,58  | 0,00008 | NM_006303                           | UBE2G2     |
| 8070799            | 1,69 | 3,22 | 0,06043 | 2,88  | 7,38  | 0,00111 | NM_182688                           | DENND5A    |
| 7946478            | 1,68 | 3,21 | 0,02408 | 2,48  | 5,59  | 0,00017 | NM_015213                           | CCDC14     |
| 8090133            | 1,68 | 3,21 | 0,05432 | 1,82  | 3,52  | 0,00618 | NM_022757                           | TIMM50     |
| 8028705            | 1,68 | 3,21 | 0,01054 | 2,52  | 5,73  | 0,00472 | NM_001001563                        | CCDC43     |
| 8016088            | 1,68 | 3,21 | 0,03776 | 3,38  | 10,42 | 0,00003 | NM_144609                           | DDI2       |
| 7898211            | 1,68 | 3,21 | 0,01567 | 2,59  | 6,03  | 0,00448 | NM_032341                           | RPL21      |
| 7936727            | 1,68 | 3,21 | 0,21168 | 0,51  | 1,42  | 0,10385 | NM_000982                           | ANAPC1     |
| 8054614            | 1,68 | 3,21 | 0,05806 | 3,67  | 12,71 | 0,00136 | NM_022662                           | AASDH      |
| 8100478            | 1,68 | 3,21 | 0,03957 | 2,62  | 6,13  | 0,00150 | NM_181806                           | CTCF       |
| 8067206            | 1,68 | 3,21 | 0,02478 | 0,36  | 1,28  | 0,67145 | BC137482 ABCA8                      |            |
| 8017885            | 1,68 | 3,20 | 0,05979 | -0,98 | -1,97 | 0,06407 | NM_007168                           | KITLG      |
| 7965322            | 1,68 | 3,20 | 0,12469 | 1,02  | 2,02  | 0,04260 | NM_000899                           | RORB       |
| 8155864            | 1,68 | 3,20 | 0,03984 | -1,07 | -2,10 | 0,00086 | NM_006914                           | ZNF346     |
| 8110253            | 1,68 | 3,20 | 0,03030 | 2,26  | 4,78  | 0,00133 | NM_012279                           | ASPM       |
| 7923086            | 1,68 | 3,20 | 0,01579 | 2,40  | 5,29  | 0,01098 | NM_018136                           | SQSTM1     |
| 8110569            | 1,68 | 3,20 | 0,00476 | 2,58  | 5,99  | 0,00131 | NM_003900                           | FAM21B     |

|         |      |      |         |       |       |         |              |           |
|---------|------|------|---------|-------|-------|---------|--------------|-----------|
| 7927323 | 1,68 | 3,20 | 0,01705 | 1,81  | 3,51  | 0,00109 | NM_018232    | ZNF330    |
| 8097543 | 1,67 | 3,19 | 0,04679 | 2,24  | 4,71  | 0,00035 | NM_014487    | GPAM      |
| 7936322 | 1,67 | 3,19 | 0,06137 | 2,54  | 5,81  | 0,00099 | NM_020918    | DUSP7     |
| 8087833 | 1,67 | 3,19 | 0,07836 | 2,67  | 6,35  | 0,00397 | NM_001947    | O9_Sep    |
| 8010161 | 1,67 | 3,19 | 0,00989 | 2,63  | 6,19  | 0,00129 | NM_006640    | ABHD6     |
| 8080762 | 1,67 | 3,19 | 0,05930 | 2,80  | 6,97  | 0,00195 | NM_020676    | POLR2J3   |
| 8141791 | 1,67 | 3,19 | 0,03373 | 3,41  | 10,64 | 0,00296 | NM_001097615 | GPATCH8   |
| 8016077 | 1,67 | 3,19 | 0,00397 | 2,58  | 5,98  | 0,00003 | NM_001002909 | LBH       |
| 8041206 | 1,67 | 3,19 | 0,00060 | -0,88 | -1,84 | 0,00034 | NM_030915    | ZNF234    |
| 8029392 | 1,67 | 3,19 | 0,03496 | 2,48  | 5,58  | 0,00337 | NM_006630    | ELF4      |
| 8175039 | 1,67 | 3,19 | 0,07093 | 2,42  | 5,34  | 0,00478 | NM_001421    | TRIM8     |
| 7930139 | 1,67 | 3,19 | 0,07369 | 2,81  | 7,03  | 0,00217 | NM_030912    | ---       |
| 8107096 | 1,67 | 3,18 | 0,06290 | 0,17  | 1,13  | 0,56976 | ---          | FER       |
| 8107208 | 1,67 | 3,18 | 0,00144 | 0,98  | 1,97  | 0,04798 | NM_005246    | PPM1A     |
| 7974781 | 1,67 | 3,18 | 0,00138 | 1,91  | 3,76  | 0,01022 | NM_021003    | EIF2B2    |
| 7975760 | 1,67 | 3,18 | 0,04654 | 2,98  | 7,89  | 0,00629 | NM_014239    | C20orf20  |
| 8063949 | 1,67 | 3,18 | 0,07957 | 2,26  | 4,79  | 0,00104 | NM_018270    | TMEM33    |
| 8094830 | 1,67 | 3,18 | 0,04508 | 3,13  | 8,77  | 0,00432 | NM_018126    | GOLPH3L   |
| 7919780 | 1,67 | 3,18 | 0,07623 | 3,76  | 13,57 | 0,00008 | NM_018178    | MFAP2     |
| 7912887 | 1,67 | 3,18 | 0,05712 | 2,36  | 5,12  | 0,00784 | NM_002403    | HDHD1A    |
| 8171222 | 1,67 | 3,18 | 0,03458 | 2,45  | 5,45  | 0,00021 | NM_001135565 | UBXN2B    |
| 8146544 | 1,67 | 3,18 | 0,10039 | 2,75  | 6,75  | 0,00226 | NM_001077619 | TTC14     |
| 8084128 | 1,67 | 3,18 | 0,05195 | 1,01  | 2,02  | 0,04171 | NM_133462    | FAM127C   |
| 8175299 | 1,67 | 3,17 | 0,06209 | -1,13 | -2,19 | 0,02681 | NM_001078173 | COMMD7    |
| 8065637 | 1,67 | 3,17 | 0,01508 | 1,72  | 3,30  | 0,00065 | NM_053041    | PPM1B     |
| 8041713 | 1,67 | 3,17 | 0,05729 | 2,62  | 6,16  | 0,00812 | NM_177968    | MMS19     |
| 7935474 | 1,67 | 3,17 | 0,02439 | 3,13  | 8,75  | 0,00002 | NM_022362    | TRIP11    |
| 7980923 | 1,66 | 3,17 | 0,06119 | 1,80  | 3,49  | 0,04049 | NM_004239    | HN1       |
| 8018305 | 1,66 | 3,17 | 0,02055 | 2,95  | 7,71  | 0,00109 | NM_016185    | ---       |
| 7896746 | 1,66 | 3,17 | 0,03845 | -1,86 | -3,62 | 0,01605 | ---          | NDUFA8    |
| 8163930 | 1,66 | 3,17 | 0,03679 | 2,19  | 4,57  | 0,00008 | NM_014222    | RPL36A    |
| 8168843 | 1,66 | 3,17 | 0,04511 | 1,39  | 2,62  | 0,02623 | NM_021029    | PCID2     |
| 7972867 | 1,66 | 3,17 | 0,01230 | 1,59  | 3,02  | 0,02703 | NM_001127202 | KIAA1797  |
| 8154574 | 1,66 | 3,17 | 0,01903 | 2,88  | 7,35  | 0,00399 | NM_017794    | RNF213    |
| 8010454 | 1,66 | 3,17 | 0,02499 | 2,87  | 7,32  | 0,00015 | NM_020914    | CDC25B    |
| 8060675 | 1,66 | 3,16 | 0,02366 | 2,04  | 4,11  | 0,00222 | NM_021873    | ATG2B     |
| 7981192 | 1,66 | 3,16 | 0,04667 | 3,30  | 9,88  | 0,00008 | NM_018036    | KIAA1826  |
| 7951422 | 1,66 | 3,16 | 0,08238 | 2,19  | 4,56  | 0,01239 | NM_032424    | EDNRB     |
| 7972157 | 1,66 | 3,16 | 0,01224 | -0,58 | -1,50 | 0,00651 | NM_001122659 | KIAA0528  |
| 7961767 | 1,66 | 3,16 | 0,01569 | 3,04  | 8,21  | 0,00069 | AK295862     | JTB       |
| 7920409 | 1,66 | 3,16 | 0,00092 | 2,80  | 6,96  | 0,00005 | NM_006694    | ZNF850P   |
| 8036351 | 1,66 | 3,16 | 0,01804 | 1,42  | 2,68  | 0,02415 | BC052603     | LDOC1     |
| 8175539 | 1,66 | 3,16 | 0,04726 | 3,21  | 9,23  | 0,00037 | NM_012317    | HMBOX1    |
| 8145636 | 1,66 | 3,16 | 0,05803 | 2,91  | 7,52  | 0,00054 | NM_024567    | TRIM25    |
| 8016847 | 1,66 | 3,16 | 0,02272 | 3,23  | 9,35  | 0,00044 | NM_005082    | C1GALT1   |
| 8131475 | 1,66 | 3,16 | 0,01505 | 2,63  | 6,19  | 0,00987 | NM_020156    | NSUN2     |
| 8110894 | 1,66 | 3,15 | 0,03720 | 2,91  | 7,49  | 0,00020 | NM_017755    | SUMO3     |
| 8070811 | 1,66 | 3,15 | 0,07002 | 3,16  | 8,95  | 0,00021 | NM_006936    | ---       |
| 7974481 | 1,66 | 3,15 | 0,25749 | 0,51  | 1,43  | 0,25252 | ---          | MRPS16    |
| 7934326 | 1,66 | 3,15 | 0,00465 | 1,72  | 3,29  | 0,00905 | NM_016065    | LIN54     |
| 8101411 | 1,66 | 3,15 | 0,00273 | 1,07  | 2,10  | 0,04401 | NM_194282    | TEX264    |
| 8080121 | 1,66 | 3,15 | 0,00038 | 1,40  | 2,65  | 0,02142 | NM_015926    | C15orf23  |
| 7982712 | 1,66 | 3,15 | 0,01007 | 2,79  | 6,90  | 0,00055 | NM_033286    | PRKG2     |
| 8101284 | 1,65 | 3,15 | 0,06779 | 0,45  | 1,37  | 0,22926 | NM_006259    | LCOR      |
| 7929596 | 1,65 | 3,14 | 0,09295 | 2,12  | 4,34  | 0,01895 | NM_032440    | TNFRSF21  |
| 8126839 | 1,65 | 3,14 | 0,01136 | 2,65  | 6,27  | 0,00279 | NM_014452    | CDKAL1    |
| 8117140 | 1,65 | 3,14 | 0,04051 | 2,84  | 7,16  | 0,00030 | NM_017774    | SAP130    |
| 8055104 | 1,65 | 3,14 | 0,04866 | 3,43  | 10,79 | 0,00021 | NM_001145928 | ADA       |
| 8066431 | 1,65 | 3,14 | 0,00009 | 2,68  | 6,41  | 0,00306 | NM_000022    | SNX9      |
| 8122986 | 1,65 | 3,14 | 0,05548 | 2,78  | 6,85  | 0,00029 | NM_016224    | MEIS3P1   |
| 8005132 | 1,65 | 3,14 | 0,13743 | 3,83  | 14,21 | 0,00003 | NR_002211    | ZCCHC11   |
| 7916185 | 1,65 | 3,14 | 0,01926 | 3,03  | 8,15  | 0,00226 | NM_001009881 | PLAGL2    |
| 8065607 | 1,65 | 3,13 | 0,08773 | 3,00  | 8,01  | 0,00089 | NM_002657    | TSHZ3     |
| 8035896 | 1,65 | 3,13 | 0,11926 | -1,45 | -2,74 | 0,00055 | NM_020856    | IL4R      |
| 7994280 | 1,65 | 3,13 | 0,01591 | 1,69  | 3,23  | 0,01535 | NM_000418    | C6orf138  |
| 8126853 | 1,65 | 3,13 | 0,05064 | -1,69 | -3,23 | 0,06543 | NM_001013732 | AKT2      |
| 8036840 | 1,65 | 3,13 | 0,00386 | 3,03  | 8,15  | 0,00091 | NM_001626    | LOC171220 |
| 7953518 | 1,65 | 3,13 | 0,01075 | 1,62  | 3,06  | 0,00711 | U72518       | DTWD2     |
| 8113691 | 1,65 | 3,13 | 0,02553 | 2,28  | 4,85  | 0,00043 | NM_173666    | MMP19     |
| 7956038 | 1,65 | 3,13 | 0,06271 | 2,07  | 4,19  | 0,00359 | NM_002429    | WASF3     |
| 7968212 | 1,64 | 3,13 | 0,00725 | 1,99  | 3,98  | 0,00089 | NM_006646    | ZNF583    |
| 8031640 | 1,64 | 3,13 | 0,04518 | 0,37  | 1,30  | 0,52666 | NM_152478    | SNHG12    |
| 7914202 | 1,64 | 3,13 | 0,01144 | 4,69  | 25,87 | 0,00001 | AY277594     | RPS6KA2   |

|         |      |      |         |       |       |         |              |           |
|---------|------|------|---------|-------|-------|---------|--------------|-----------|
| 8130739 | 1,64 | 3,13 | 0,00185 | 2,59  | 6,03  | 0,00258 | NM_021135    | DAAM1     |
| 7974697 | 1,64 | 3,12 | 0,00781 | 2,24  | 4,71  | 0,00420 | NM_014992    | RGMB      |
| 8107100 | 1,64 | 3,12 | 0,01043 | 1,22  | 2,32  | 0,00051 | NM_001012761 | ZNF738    |
| 8027297 | 1,64 | 3,12 | 0,09817 | 2,82  | 7,07  | 0,00247 | NR_027130    | DPCD      |
| 7929976 | 1,64 | 3,12 | 0,08046 | 1,11  | 2,16  | 0,08107 | NM_015448    | DNAJB6    |
| 8137627 | 1,64 | 3,12 | 0,04456 | 0,64  | 1,56  | 0,39405 | NM_058246    | DDX19A    |
| 7997059 | 1,64 | 3,12 | 0,00668 | 0,92  | 1,90  | 0,02956 | NM_018332    | ARSJ      |
| 8102440 | 1,64 | 3,12 | 0,00505 | 2,80  | 6,96  | 0,00137 | NM_024590    | PRKDC     |
| 8150599 | 1,64 | 3,12 | 0,01264 | 2,54  | 5,82  | 0,01382 | NM_006904    | CCDC56    |
| 8015712 | 1,64 | 3,12 | 0,01934 | 2,32  | 5,00  | 0,00102 | NM_001040431 | ASNS      |
| 8141150 | 1,64 | 3,12 | 0,04128 | 2,69  | 6,47  | 0,00081 | NM_133436    | ISCA1     |
| 8162142 | 1,64 | 3,12 | 0,07051 | 0,66  | 1,59  | 0,24661 | NM_030940    | NAV3      |
| 7957298 | 1,64 | 3,12 | 0,03393 | 0,45  | 1,37  | 0,04803 | NM_014903    | CD97      |
| 8026300 | 1,64 | 3,12 | 0,06426 | 2,57  | 5,94  | 0,02952 | NM_078481    | CHST15    |
| 7936856 | 1,64 | 3,12 | 0,03502 | 1,82  | 3,53  | 0,02273 | NM_015892    | CRISPLD2  |
| 7997642 | 1,64 | 3,11 | 0,00521 | 0,03  | 1,02  | 0,87528 | NM_031476    | WDFY3     |
| 8101511 | 1,64 | 3,11 | 0,01438 | 3,37  | 10,32 | 0,00015 | NM_014991    | COL15A1   |
| 8156783 | 1,64 | 3,11 | 0,01945 | -1,73 | -3,33 | 0,00898 | NM_001855    | PEG10     |
| 8134339 | 1,64 | 3,11 | 0,07792 | 4,09  | 17,00 | 0,00485 | NM_001040152 | VPS52     |
| 8180123 | 1,64 | 3,11 | 0,01671 | 3,02  | 8,13  | 0,00054 | NM_022553    | ZCCHC7    |
| 8155234 | 1,63 | 3,10 | 0,01601 | 0,80  | 1,75  | 0,21454 | NM_032226    | PEX12     |
| 8014264 | 1,63 | 3,10 | 0,12172 | 2,53  | 5,77  | 0,00003 | NM_000286    | PCGF2     |
| 8014706 | 1,63 | 3,10 | 0,00217 | 1,98  | 3,94  | 0,00064 | NM_007144    | C14orf129 |
| 7976571 | 1,63 | 3,10 | 0,03006 | 2,91  | 7,53  | 0,00291 | NM_016472    | VPS28     |
| 8153776 | 1,63 | 3,10 | 0,08811 | 2,72  | 6,58  | 0,00098 | NM_183057    | CSNK1A1   |
| 8115022 | 1,63 | 3,10 | 0,10477 | 3,46  | 10,99 | 0,00066 | NM_001025105 | TPR       |
| 7922912 | 1,63 | 3,10 | 0,01342 | 2,27  | 4,81  | 0,00271 | NM_003292    | COX7B     |
| 8168470 | 1,63 | 3,10 | 0,02726 | -0,37 | -1,29 | 0,38587 | NM_001866    | CFI       |
| 8102328 | 1,63 | 3,10 | 0,04137 | 1,00  | 1,99  | 0,00480 | NM_000204    | UVRAG     |
| 7942626 | 1,63 | 3,10 | 0,02641 | 4,04  | 16,46 | 0,00006 | NM_003369    | TECR      |
| 8101622 | 1,63 | 3,10 | 0,09035 | 3,79  | 13,80 | 0,00050 | NM_138501    | RABL3     |
| 8089867 | 1,63 | 3,10 | 0,06900 | 3,04  | 8,24  | 0,00457 | NM_173825    | RAD51C    |
| 8008754 | 1,63 | 3,10 | 0,00577 | 2,18  | 4,54  | 0,00315 | NM_058216    | ZNF28     |
| 8038993 | 1,63 | 3,10 | 0,03902 | 2,49  | 5,63  | 0,00313 | NM_006969    | C22orf13  |
| 8075009 | 1,63 | 3,10 | 0,01003 | 2,37  | 5,18  | 0,00012 | NM_031444    | NFS1      |
| 8065992 | 1,63 | 3,09 | 0,01520 | 3,93  | 15,26 | 0,00067 | NM_021100    | AGK       |
| 8136614 | 1,63 | 3,09 | 0,00067 | 2,59  | 6,02  | 0,00057 | NM_018238    | SNRNP25   |
| 7991735 | 1,63 | 3,09 | 0,02455 | 3,27  | 9,62  | 0,00180 | NM_024571    | ANKRD50   |
| 8102720 | 1,63 | 3,09 | 0,03448 | 2,15  | 4,43  | 0,02003 | NM_020337    | AGL       |
| 7903239 | 1,63 | 3,09 | 0,00680 | 2,82  | 7,07  | 0,00153 | NM_000028    | IKBKAP    |
| 8163023 | 1,63 | 3,09 | 0,02430 | 3,53  | 11,52 | 0,00000 | NM_003640    | ZNF286B   |
| 8013305 | 1,63 | 3,09 | 0,00955 | 2,34  | 5,07  | 0,00942 | NM_001145045 | CD276     |
| 7984743 | 1,63 | 3,09 | 0,02799 | 1,57  | 2,96  | 0,01035 | NM_001024736 | ZNF682    |
| 8035782 | 1,63 | 3,09 | 0,06173 | -0,29 | -1,22 | 0,14631 | NM_033196    | GBA2      |
| 8161114 | 1,63 | 3,09 | 0,09616 | 3,32  | 10,01 | 0,00007 | NM_020944    | CCDC47    |
| 8017421 | 1,63 | 3,09 | 0,03882 | 2,68  | 6,41  | 0,00012 | NM_020198    | ZNF25     |
| 7933105 | 1,62 | 3,08 | 0,12952 | -0,29 | -1,23 | 0,44004 | NM_145011    | SEC61G    |
| 8139706 | 1,62 | 3,08 | 0,01658 | 0,13  | 1,10  | 0,48891 | NM_014302    | ZNF655    |
| 8134631 | 1,62 | 3,08 | 0,01911 | 1,18  | 2,26  | 0,02730 | NM_138494    | TUBB6     |
| 8020220 | 1,62 | 3,08 | 0,02867 | 0,62  | 1,53  | 0,37710 | NM_032525    | ATXN7L1   |
| 8142098 | 1,62 | 3,08 | 0,06448 | 2,48  | 5,60  | 0,02387 | NM_020725    | ZMYM3     |
| 8173457 | 1,62 | 3,08 | 0,00507 | 2,83  | 7,13  | 0,00004 | NM_201599    | STAT6     |
| 7964360 | 1,62 | 3,08 | 0,00077 | 1,91  | 3,76  | 0,01116 | NM_003153    | TP53BP1   |
| 7988093 | 1,62 | 3,08 | 0,06530 | 2,47  | 5,53  | 0,00027 | NM_001141980 | PMS1      |
| 8047038 | 1,62 | 3,08 | 0,05799 | 3,01  | 8,04  | 0,00054 | NM_000534    | TBCA      |
| 8112767 | 1,62 | 3,08 | 0,00558 | 0,60  | 1,51  | 0,21409 | NM_004607    | BRWD1     |
| 8070341 | 1,62 | 3,08 | 0,03353 | 2,54  | 5,80  | 0,01268 | NM_033656    | GPR89A    |
| 7904853 | 1,62 | 3,08 | 0,01860 | 2,96  | 7,79  | 0,00303 | NM_001097612 | TKT       |
| 8088106 | 1,62 | 3,08 | 0,02753 | 2,68  | 6,43  | 0,00017 | NM_001135055 | FCHO2     |
| 8106141 | 1,62 | 3,08 | 0,05486 | 1,59  | 3,01  | 0,00173 | NM_138782    | JRKL      |
| 7943314 | 1,62 | 3,07 | 0,08790 | 1,21  | 2,31  | 0,03471 | NM_003772    | RCN1      |
| 7968928 | 1,62 | 3,07 | 0,08899 | 2,15  | 4,45  | 0,00136 | NM_002901    | PHLPP2    |
| 8002571 | 1,62 | 3,07 | 0,02646 | 2,71  | 6,54  | 0,00081 | NM_015020    | RTF1      |
| 7982904 | 1,62 | 3,07 | 0,05809 | 2,81  | 7,00  | 0,00087 | NM_015138    | GNA14     |
| 8161892 | 1,62 | 3,07 | 0,03204 | 0,63  | 1,55  | 0,14354 | NM_004297    | USF1      |
| 7921738 | 1,62 | 3,07 | 0,02071 | 1,23  | 2,34  | 0,03131 | NM_007122    | PPP1R8    |
| 7899377 | 1,62 | 3,07 | 0,03003 | 1,96  | 3,89  | 0,01741 | NM_138558    | CFLAR     |
| 8047381 | 1,62 | 3,07 | 0,00976 | 2,09  | 4,24  | 0,00015 | NM_003879    | MTMR1     |
| 8170443 | 1,62 | 3,07 | 0,00476 | 2,08  | 4,24  | 0,00962 | NM_003828    | GMEB1     |
| 7899504 | 1,62 | 3,07 | 0,02918 | 2,97  | 7,86  | 0,00007 | NM_006582    | ---       |
| 8093256 | 1,62 | 3,07 | 0,02444 | 1,61  | 3,05  | 0,02111 | ---          | OSBP      |
| 7948379 | 1,62 | 3,07 | 0,01225 | 1,12  | 2,18  | 0,00215 | NM_002556    | UPRT      |
| 8168438 | 1,62 | 3,07 | 0,02074 | 1,15  | 2,22  | 0,00070 | NM_145052    | HSPB8     |



|         |      |      |         |       |       |         |                 |          |
|---------|------|------|---------|-------|-------|---------|-----------------|----------|
| 7959102 | 1,62 | 3,07 | 0,02415 | 0,09  | 1,06  | 0,53779 | NM_014365       | RNF103   |
| 8053576 | 1,62 | 3,07 | 0,00252 | 1,74  | 3,35  | 0,00327 | NM_005667       | FOLH1    |
| 7939897 | 1,62 | 3,06 | 0,33262 | 1,00  | 2,00  | 0,05777 | NM_004476       | ARHGAP24 |
| 8096160 | 1,62 | 3,06 | 0,02259 | -0,36 | -1,29 | 0,44387 | NM_001025616    | ATG10    |
| 8106709 | 1,62 | 3,06 | 0,01493 | 1,27  | 2,41  | 0,06630 | NM_031482       | FAM21A   |
| 7927560 | 1,62 | 3,06 | 0,02274 | 1,89  | 3,72  | 0,00027 | NM_001005751    | NEDD1    |
| 7957715 | 1,61 | 3,06 | 0,00959 | 3,19  | 9,16  | 0,00146 | NM_001135175    | VPS52    |
| 8125649 | 1,61 | 3,06 | 0,01301 | 2,83  | 7,13  | 0,00044 | NM_022553       | VPS52    |
| 8178917 | 1,61 | 3,06 | 0,01301 | 2,83  | 7,13  | 0,00044 | NM_022553       | ELOF1    |
| 8034299 | 1,61 | 3,06 | 0,00519 | 1,20  | 2,30  | 0,08613 | NM_032377       | MAP1A    |
| 7983228 | 1,61 | 3,06 | 0,01527 | -1,57 | -2,97 | 0,02207 | NM_002373       | NOL8     |
| 8162352 | 1,61 | 3,06 | 0,01562 | 1,79  | 3,45  | 0,00358 | NR_024020       | ---      |
| 8171024 | 1,61 | 3,06 | 0,04157 | 1,68  | 3,21  | 0,01019 | ---             | CCNH     |
| 8113010 | 1,61 | 3,06 | 0,02898 | 1,46  | 2,74  | 0,02117 | NM_001239       | RPLP1    |
| 7984562 | 1,61 | 3,05 | 0,01759 | 2,43  | 5,37  | 0,00075 | NM_001003       | AIFM1    |
| 8175052 | 1,61 | 3,05 | 0,00853 | 2,80  | 6,94  | 0,00008 | NM_001130847    | SMARCE1  |
| 8015039 | 1,61 | 3,05 | 0,00972 | 1,64  | 3,12  | 0,00653 | NM_003079       | CEP120   |
| 8113733 | 1,61 | 3,05 | 0,01559 | 1,33  | 2,51  | 0,03694 | NM_153223       | FAM86B1  |
| 8149387 | 1,61 | 3,05 | 0,11716 | 2,31  | 4,97  | 0,04878 | NR_003494       | ZAK      |
| 8046461 | 1,61 | 3,05 | 0,04611 | 2,67  | 6,36  | 0,00046 | NM_133646       | GNPTG    |
| 7992255 | 1,61 | 3,05 | 0,03131 | 1,12  | 2,17  | 0,08133 | NM_032520       | ABCA1    |
| 8162940 | 1,61 | 3,05 | 0,01517 | 1,58  | 2,99  | 0,00305 | NM_005502       | UFM1     |
| 7968670 | 1,61 | 3,04 | 0,06782 | 1,26  | 2,39  | 0,05920 | NM_016617       | DRAP1    |
| 7941460 | 1,61 | 3,04 | 0,04269 | 2,20  | 4,61  | 0,02446 | NM_006442       | CHMP1B   |
| 8020179 | 1,61 | 3,04 | 0,05935 | 2,82  | 7,08  | 0,00141 | NM_020412       | ELF2     |
| 8102817 | 1,61 | 3,04 | 0,09237 | 2,16  | 4,46  | 0,00077 | NM_201999       | NETO2    |
| 8001197 | 1,61 | 3,04 | 0,08188 | 4,44  | 21,67 | 0,00547 | NM_018092       | ZFAND6   |
| 7985259 | 1,60 | 3,04 | 0,09348 | 3,20  | 9,19  | 0,00281 | NM_019006       | MST131   |
| 8145766 | 1,60 | 3,04 | 0,03787 | -0,48 | -1,40 | 0,44635 | ENST00000423322 | CDK19    |
| 8128867 | 1,60 | 3,04 | 0,03893 | 1,58  | 2,98  | 0,01706 | NM_015076       | FAM86B1  |
| 8149365 | 1,60 | 3,03 | 0,01845 | 3,27  | 9,63  | 0,00279 | NR_003494       | TANC1    |
| 8045889 | 1,60 | 3,03 | 0,02153 | 2,69  | 6,47  | 0,01273 | NM_033394       | ANKRD13C |
| 7916928 | 1,60 | 3,03 | 0,05201 | 2,23  | 4,70  | 0,00227 | NM_030816       | S100A4   |
| 7920271 | 1,60 | 3,03 | 0,04957 | -0,45 | -1,36 | 0,47423 | NM_019554       | ATRN     |
| 8060627 | 1,60 | 3,03 | 0,02113 | 2,94  | 7,66  | 0,00006 | NM_139321       | ALDH2    |
| 7958784 | 1,60 | 3,03 | 0,03945 | 3,19  | 9,13  | 0,00443 | NM_000690       | PPLI3    |
| 8058147 | 1,60 | 3,03 | 0,08165 | 3,52  | 11,50 | 0,00116 | NM_130906       | VCPIP1   |
| 8151118 | 1,60 | 3,03 | 0,06523 | 0,89  | 1,85  | 0,00014 | NM_025054       | TAF15    |
| 8006573 | 1,60 | 3,03 | 0,00297 | 2,84  | 7,15  | 0,00007 | NM_139215       | PCNA     |
| 8064844 | 1,60 | 3,03 | 0,03020 | 1,86  | 3,63  | 0,00495 | NM_002592       | RPL18AP3 |
| 7958197 | 1,60 | 3,03 | 0,00495 | 1,20  | 2,29  | 0,00557 | NR_001593       | APLF     |
| 8042402 | 1,60 | 3,02 | 0,04580 | 1,29  | 2,45  | 0,02190 | NM_173545       | PLA2G2A  |
| 7913216 | 1,60 | 3,02 | 0,10555 | -1,66 | -3,16 | 0,00565 | NM_000300       | UBQLN2   |
| 8167924 | 1,60 | 3,02 | 0,02005 | 1,65  | 3,14  | 0,00384 | NM_013444       | MICB     |
| 8177955 | 1,60 | 3,02 | 0,03996 | 4,22  | 18,65 | 0,00001 | NM_005931       | TMEM54   |
| 7914592 | 1,60 | 3,02 | 0,00032 | 2,37  | 5,17  | 0,00503 | NM_033504       | RSL1D1   |
| 7999520 | 1,59 | 3,02 | 0,04419 | 2,96  | 7,78  | 0,00060 | NM_015659       | RNF10    |
| 7959173 | 1,59 | 3,02 | 0,03065 | 2,71  | 6,52  | 0,00209 | NM_014868       | PTGS1    |
| 8157650 | 1,59 | 3,02 | 0,00023 | -0,60 | -1,51 | 0,03289 | NM_000962       | ZNF518A  |
| 7929562 | 1,59 | 3,02 | 0,00994 | 3,25  | 9,49  | 0,00073 | NM_014803       | ALKBH3   |
| 7939477 | 1,59 | 3,02 | 0,01272 | 2,26  | 4,78  | 0,00384 | NM_139178       | SFPQ     |
| 7914791 | 1,59 | 3,02 | 0,03299 | 2,19  | 4,58  | 0,02557 | NM_005066       | MAPK3    |
| 8000811 | 1,59 | 3,02 | 0,04919 | 2,61  | 6,11  | 0,00078 | NM_001040056    | PYGO1    |
| 7989069 | 1,59 | 3,02 | 0,02295 | 0,99  | 1,99  | 0,01322 | NM_015617       | TXNDC12  |
| 7916120 | 1,59 | 3,01 | 0,04388 | 3,40  | 10,58 | 0,00246 | NM_015913       | WDR33    |
| 8055060 | 1,59 | 3,01 | 0,00589 | 2,27  | 4,82  | 0,00029 | NM_018383       | ZNF765   |
| 8030982 | 1,59 | 3,01 | 0,00530 | 0,61  | 1,52  | 0,01531 | NM_001040185    | NFX1     |
| 8154793 | 1,59 | 3,01 | 0,00176 | 2,26  | 4,80  | 0,00123 | NM_002504       | RASSF8   |
| 7954469 | 1,59 | 3,01 | 0,00419 | -0,19 | -1,14 | 0,26900 | NM_007211       | MED17    |
| 7943176 | 1,59 | 3,01 | 0,02982 | 2,94  | 7,65  | 0,00104 | NM_004268       | SCNM1    |
| 7905355 | 1,59 | 3,01 | 0,00955 | 1,78  | 3,44  | 0,00003 | NM_024041       | TMEM154  |
| 8103226 | 1,59 | 3,01 | 0,00801 | 0,61  | 1,52  | 0,03978 | NM_152680       | IGFBP6   |
| 7955694 | 1,59 | 3,01 | 0,00089 | -1,01 | -2,02 | 0,01366 | NM_002178       | LRIG1    |
| 8088642 | 1,59 | 3,01 | 0,08691 | 3,02  | 8,12  | 0,00215 | NM_015541       | SPOPL    |
| 8045514 | 1,59 | 3,01 | 0,05987 | 2,30  | 4,92  | 0,00020 | NM_001001664    | ENG      |
| 8164269 | 1,59 | 3,01 | 0,00834 | -1,12 | -2,17 | 0,00553 | NM_000118       | MTOR     |
| 7912412 | 1,59 | 3,01 | 0,04833 | 3,22  | 9,32  | 0,00014 | NM_004958       | YTHDC1   |
| 8100714 | 1,59 | 3,01 | 0,02271 | 2,92  | 7,58  | 0,00087 | NM_001031732    | GRPEL1   |
| 8099246 | 1,59 | 3,00 | 0,01218 | 3,97  | 15,62 | 0,00007 | NM_025196       | RWDD3    |
| 7903171 | 1,59 | 3,00 | 0,07623 | 0,11  | 1,08  | 0,55803 | NM_015485       | ZDHC6    |
| 7936346 | 1,59 | 3,00 | 0,09784 | 3,75  | 13,49 | 0,00018 | NM_022494       | BNIP1    |
| 8110043 | 1,58 | 3,00 | 0,02838 | 1,28  | 2,42  | 0,00606 | NM_013979       | EIF1B    |
| 8078962 | 1,58 | 3,00 | 0,01499 | 0,77  | 1,71  | 0,18967 | NM_005875       | PHB      |

|         |      |      |         |       |       |         |                  |           |
|---------|------|------|---------|-------|-------|---------|------------------|-----------|
| 8016552 | 1,58 | 3,00 | 0,00126 | 2,55  | 5,84  | 0,00161 | NM_002634        | RAB6C     |
| 8045136 | 1,58 | 3,00 | 0,01513 | 1,51  | 2,86  | 0,02692 | NM_032144        | ZBTB41    |
| 7923119 | 1,58 | 3,00 | 0,03382 | 3,02  | 8,11  | 0,00488 | NM_194314        | IER3IP1   |
| 8023175 | 1,58 | 3,00 | 0,03440 | 1,52  | 2,88  | 0,00002 | NM_016097        | LRRRC37B2 |
| 8006170 | 1,58 | 2,99 | 0,02708 | 3,38  | 10,42 | 0,00033 | NR_015341        | RIF1      |
| 8045697 | 1,58 | 2,99 | 0,04887 | 3,02  | 8,13  | 0,01065 | NM_018151        | ZNF354A   |
| 8116247 | 1,58 | 2,99 | 0,00526 | 2,16  | 4,47  | 0,02965 | NM_005649        | FBXW7     |
| 8103206 | 1,58 | 2,99 | 0,04743 | 1,32  | 2,49  | 0,00496 | NM_033632        | IDH3G     |
| 8175844 | 1,58 | 2,99 | 0,01407 | 2,10  | 4,29  | 0,01341 | NM_174869        | SLC39A1   |
| 7920401 | 1,58 | 2,99 | 0,03932 | 3,38  | 10,41 | 0,00007 | NM_014437        | SLC25A5   |
| 8169640 | 1,58 | 2,99 | 0,04540 | 4,21  | 18,54 | 0,00017 | NM_001152        | SFRS13A   |
| 7913712 | 1,58 | 2,98 | 0,00341 | 1,00  | 2,00  | 0,02633 | NM_006625        | NOL10     |
| 8050255 | 1,58 | 2,98 | 0,01164 | 2,13  | 4,37  | 0,00557 | NM_024894        | NAF1      |
| 8103485 | 1,58 | 2,98 | 0,04055 | 1,78  | 3,44  | 0,00209 | NM_138386        | C7orf59   |
| 8134740 | 1,58 | 2,98 | 0,02191 | 1,86  | 3,62  | 0,00386 | NM_001008395     | NECAP2    |
| 7898337 | 1,58 | 2,98 | 0,03580 | 2,49  | 5,63  | 0,00081 | NM_018090        | TRIT1     |
| 7915261 | 1,58 | 2,98 | 0,04243 | 2,89  | 7,41  | 0,00040 | NM_017646        | TSGA14    |
| 8142930 | 1,58 | 2,98 | 0,04282 | 1,55  | 2,93  | 0,00477 | NM_018718        | LEMD3     |
| 7956842 | 1,58 | 2,98 | 0,02762 | 2,60  | 6,06  | 0,00256 | NM_014319        | RPS26     |
| 7956114 | 1,57 | 2,98 | 0,01295 | 0,55  | 1,46  | 0,09105 | NM_001029        | STYX      |
| 7974387 | 1,57 | 2,98 | 0,04907 | 2,63  | 6,18  | 0,00144 | NM_145251        | TBC1D13   |
| 8158406 | 1,57 | 2,98 | 0,00690 | 2,16  | 4,46  | 0,00694 | NM_018201        | FGD6      |
| 7965541 | 1,57 | 2,97 | 0,02038 | 2,84  | 7,16  | 0,01204 | NM_018351        | MORC3     |
| 8068460 | 1,57 | 2,97 | 0,05135 | 2,34  | 5,05  | 0,00594 | NM_015358        | HERC2P2   |
| 7986701 | 1,57 | 2,97 | 0,01134 | 2,98  | 7,89  | 0,00676 | NR_002824        | MAK16     |
| 8145782 | 1,57 | 2,97 | 0,09546 | 3,20  | 9,17  | 0,00002 | NM_032509        | RPS26     |
| 8102410 | 1,57 | 2,97 | 0,00970 | 0,43  | 1,34  | 0,15657 | NM_001029        | C6orf129  |
| 8126095 | 1,57 | 2,97 | 0,06491 | 2,73  | 6,64  | 0,00076 | NM_138493        | SEC11A    |
| 7991143 | 1,57 | 2,97 | 0,00809 | 1,03  | 2,04  | 0,15122 | NM_014300        | TGFBRAP1  |
| 8054364 | 1,57 | 2,97 | 0,03324 | 3,47  | 11,06 | 0,00087 | NM_004257        | YBX1P2    |
| 8142084 | 1,57 | 2,97 | 0,00701 | 1,05  | 2,07  | 0,09409 | CR601484 RFT1    |           |
| 8088092 | 1,57 | 2,97 | 0,03016 | 3,05  | 8,26  | 0,00002 | NM_052859        | UBL7      |
| 7990361 | 1,57 | 2,97 | 0,00162 | 1,56  | 2,96  | 0,00180 | NM_032907        | ---       |
| 7947423 | 1,57 | 2,97 | 0,37607 | -1,78 | -3,43 | 0,30213 | ---              | CEP192    |
| 8020267 | 1,57 | 2,97 | 0,02095 | 2,89  | 7,42  | 0,00850 | NM_032142        | SNRNP40   |
| 7914334 | 1,57 | 2,97 | 0,15940 | 2,33  | 5,04  | 0,06312 | NM_004814        | CDIPT     |
| 8000706 | 1,57 | 2,97 | 0,00459 | 2,02  | 4,05  | 0,02533 | NM_006319        | ---       |
| 8110914 | 1,57 | 2,97 | 0,08350 | 1,12  | 2,17  | 0,00281 | ---              | SPRY2     |
| 7972217 | 1,57 | 2,96 | 0,01486 | 2,70  | 6,51  | 0,00162 | NM_005842        | ---       |
| 8161169 | 1,57 | 2,96 | 0,00156 | 1,16  | 2,23  | 0,03780 | ---              | PLEKHM3   |
| 8058509 | 1,57 | 2,96 | 0,02733 | 2,11  | 4,31  | 0,00336 | NM_001080475     | C3orf26   |
| 8081241 | 1,57 | 2,96 | 0,07381 | 3,55  | 11,74 | 0,00080 | NM_032359        | DENND1B   |
| 7923141 | 1,57 | 2,96 | 0,00953 | 3,05  | 8,28  | 0,00089 | NM_144977        | COG4      |
| 8002381 | 1,57 | 2,96 | 0,01437 | 1,98  | 3,94  | 0,00023 | NM_015386        | HERC2P2   |
| 7986569 | 1,57 | 2,96 | 0,02184 | 2,75  | 6,73  | 0,00752 | NR_002824        | CFTR      |
| 8135661 | 1,57 | 2,96 | 0,05251 | -1,03 | -2,04 | 0,01572 | NM_000492        | NCOA3     |
| 8063211 | 1,57 | 2,96 | 0,00874 | 3,80  | 13,93 | 0,00019 | NM_181659        | HLA-E     |
| 8177788 | 1,57 | 2,96 | 0,00776 | 2,76  | 6,79  | 0,00521 | NM_005516        | HLA-E     |
| 8179103 | 1,57 | 2,96 | 0,00776 | 2,76  | 6,79  | 0,00521 | NM_005516        | COQ5      |
| 7967072 | 1,56 | 2,96 | 0,06758 | 3,31  | 9,92  | 0,00003 | NM_032314        | GK        |
| 8166632 | 1,56 | 2,96 | 0,05745 | 1,79  | 3,45  | 0,00298 | NM_001128127     | SUPT6H    |
| 8005903 | 1,56 | 2,95 | 0,01892 | 2,29  | 4,89  | 0,00069 | NM_003170        | TNPO2     |
| 8034482 | 1,56 | 2,95 | 0,03278 | 2,98  | 7,87  | 0,00109 | NM_001136196     | PSAT1     |
| 8156043 | 1,56 | 2,95 | 0,01915 | 4,74  | 26,73 | 0,00019 | NM_058179        | MAN2B2    |
| 8093916 | 1,56 | 2,95 | 0,00109 | 1,49  | 2,81  | 0,01474 | NM_015274        | TMEM126B  |
| 7942879 | 1,56 | 2,95 | 0,02464 | 1,75  | 3,35  | 0,00928 | NM_018480        | HERC1     |
| 7989516 | 1,56 | 2,95 | 0,01331 | 1,64  | 3,12  | 0,00035 | NM_003922        | C4orf27   |
| 8103684 | 1,56 | 2,95 | 0,00106 | 0,15  | 1,11  | 0,83763 | NM_017867        | DENND2C   |
| 7918749 | 1,56 | 2,95 | 0,06661 | -0,46 | -1,37 | 0,06751 | BC063894 HSD17B6 |           |
| 7956271 | 1,56 | 2,95 | 0,02637 | 1,58  | 2,98  | 0,00016 | NM_003725        | RPL12     |
| 8063473 | 1,56 | 2,95 | 0,05346 | 1,35  | 2,55  | 0,00022 | NM_000976        | METTL1    |
| 8171876 | 1,56 | 2,95 | 0,11489 | 1,02  | 2,03  | 0,07094 | NM_005371        | P DPR     |
| 7997025 | 1,56 | 2,95 | 0,01162 | 1,65  | 3,13  | 0,10829 | NM_017990        | PTGS2     |
| 7922976 | 1,56 | 2,95 | 0,02053 | 0,47  | 1,39  | 0,29579 | NM_000963        | MAD2L1BP  |
| 8119874 | 1,56 | 2,94 | 0,00527 | 2,93  | 7,60  | 0,00277 | NM_014628        | PSTPIP2   |
| 8023043 | 1,56 | 2,94 | 0,02207 | 1,01  | 2,01  | 0,01244 | NM_024430        | GON4L     |
| 7920810 | 1,56 | 2,94 | 0,05049 | 2,36  | 5,13  | 0,00409 | NM_001037533     | PTPLAD2   |
| 8160346 | 1,56 | 2,94 | 0,04313 | 0,39  | 1,31  | 0,06425 | NM_001010915     | PDE8A     |
| 7985662 | 1,56 | 2,94 | 0,05782 | 4,65  | 25,07 | 0,00011 | NM_002605        | ---       |
| 8106473 | 1,56 | 2,94 | 0,01253 | -0,15 | -1,11 | 0,80893 | ---              | SLC39A14  |
| 8145122 | 1,56 | 2,94 | 0,01651 | 2,70  | 6,51  | 0,00035 | NM_001128431     | HNRNPUL1  |
| 8029029 | 1,56 | 2,94 | 0,03204 | 3,04  | 8,25  | 0,00171 | NM_007040        | KIAA0947  |
| 8104350 | 1,56 | 2,94 | 0,00137 | 2,35  | 5,09  | 0,00383 | NM_015325        | WWC2      |

|         |      |      |         |       |       |         |                 |           |
|---------|------|------|---------|-------|-------|---------|-----------------|-----------|
| 8098470 | 1,56 | 2,94 | 0,01125 | 1,93  | 3,81  | 0,00726 | NM_024949       | BRD2      |
| 8118580 | 1,55 | 2,94 | 0,08311 | 2,67  | 6,37  | 0,00354 | NM_005104       | ELK3      |
| 7957665 | 1,55 | 2,94 | 0,09376 | 2,59  | 6,01  | 0,00192 | NM_005230       | SMG1      |
| 8000823 | 1,55 | 2,93 | 0,01612 | 2,98  | 7,91  | 0,00921 | NM_015092       | FARS2     |
| 8116724 | 1,55 | 2,93 | 0,04307 | 2,34  | 5,05  | 0,00199 | NM_006567       | GORAB     |
| 7907213 | 1,55 | 2,93 | 0,12297 | 1,71  | 3,27  | 0,00200 | NM_152281       | NUP54     |
| 8101143 | 1,55 | 2,93 | 0,00598 | 2,08  | 4,23  | 0,00148 | NM_017426       | TMCC1     |
| 8090630 | 1,55 | 2,93 | 0,01012 | 1,93  | 3,80  | 0,03581 | NM_001017395    | NUMB      |
| 7980005 | 1,55 | 2,93 | 0,01640 | 2,62  | 6,14  | 0,00043 | NM_001005743    | MXRA8     |
| 7911529 | 1,55 | 2,93 | 0,21298 | -2,34 | -5,07 | 0,00023 | NM_032348       | ATPBD4    |
| 7987369 | 1,55 | 2,93 | 0,05632 | 2,96  | 7,77  | 0,00300 | NM_080650       | PLEKHM1P  |
| 8017675 | 1,55 | 2,93 | 0,02194 | 2,91  | 7,54  | 0,00425 | NR_024386       | USP45     |
| 8128409 | 1,55 | 2,93 | 0,03040 | 2,38  | 5,22  | 0,00532 | NM_001080481    | PGAP1     |
| 8057959 | 1,55 | 2,93 | 0,02351 | 1,82  | 3,54  | 0,01429 | NM_024989       | SPATA5    |
| 8097262 | 1,55 | 2,93 | 0,05733 | 2,30  | 4,92  | 0,00117 | NM_145207       | PRAF2     |
| 8172531 | 1,55 | 2,93 | 0,11491 | 0,88  | 1,84  | 0,02861 | NM_007213       | TRIM23    |
| 8112388 | 1,55 | 2,93 | 0,03140 | 0,84  | 1,79  | 0,10611 | NM_001656       | TAOK3     |
| 7966851 | 1,55 | 2,93 | 0,01858 | 2,24  | 4,73  | 0,00307 | NM_016281       | YIPF3     |
| 8126574 | 1,55 | 2,92 | 0,02835 | 2,03  | 4,08  | 0,00040 | NM_015388       | MKK       |
| 7932733 | 1,55 | 2,92 | 0,00690 | -0,26 | -1,20 | 0,25382 | NM_173576       | LRRCS9    |
| 8016708 | 1,55 | 2,92 | 0,01249 | 2,27  | 4,84  | 0,00737 | NM_018509       | NFKB1     |
| 8096635 | 1,55 | 2,92 | 0,07908 | 3,81  | 14,06 | 0,00017 | NM_003998       | PAPOLG    |
| 8042119 | 1,54 | 2,92 | 0,08589 | 3,06  | 8,34  | 0,00220 | NM_022894       | MSRB3     |
| 7956856 | 1,54 | 2,91 | 0,18562 | 0,84  | 1,79  | 0,10776 | NM_001031679    | EPM2AIP1  |
| 8086141 | 1,54 | 2,91 | 0,09650 | 0,73  | 1,66  | 0,13341 | NM_014805       | SEC11C    |
| 8021453 | 1,54 | 2,91 | 0,02467 | 2,23  | 4,69  | 0,00492 | NM_033280       | SERF2     |
| 7983290 | 1,54 | 2,91 | 0,00062 | 0,42  | 1,34  | 0,11401 | NM_001018108    | ZNF627    |
| 8025927 | 1,54 | 2,91 | 0,04947 | 2,04  | 4,11  | 0,00716 | NM_145295       | NR3C1     |
| 8114814 | 1,54 | 2,91 | 0,01005 | 2,79  | 6,93  | 0,00035 | NM_000176       | RPS27A    |
| 7908407 | 1,54 | 2,91 | 0,01884 | 1,17  | 2,25  | 0,00775 | NM_002954       | SLCSA3    |
| 8068353 | 1,54 | 2,91 | 0,01051 | 2,23  | 4,71  | 0,00183 | NM_006933       | CITED2    |
| 8129937 | 1,54 | 2,91 | 0,04470 | 2,55  | 5,87  | 0,00169 | NM_006079       | FMR1      |
| 8170326 | 1,54 | 2,91 | 0,00718 | 2,47  | 5,55  | 0,00125 | NM_002024       | KIAA1467  |
| 7954077 | 1,54 | 2,90 | 0,04258 | 3,66  | 12,66 | 0,00001 | NM_020853       | HMG3      |
| 8127743 | 1,54 | 2,90 | 0,00350 | 1,76  | 3,38  | 0,00872 | NM_004242       | ZNF343    |
| 8064514 | 1,54 | 2,90 | 0,00679 | 0,50  | 1,42  | 0,11441 | NM_024325       | PREB      |
| 8051012 | 1,54 | 2,90 | 0,04456 | 2,32  | 4,99  | 0,00065 | NM_013388       | CHD4      |
| 7960594 | 1,54 | 2,90 | 0,00138 | 1,75  | 3,36  | 0,00078 | NM_001273       | HNRNPH1   |
| 8116297 | 1,54 | 2,90 | 0,09066 | 3,58  | 11,99 | 0,00001 | NM_005520       | ZNF426    |
| 8033780 | 1,54 | 2,90 | 0,17633 | 3,00  | 7,98  | 0,00023 | NM_024106       | PHIP      |
| 8127698 | 1,53 | 2,90 | 0,00069 | 1,38  | 2,60  | 0,03315 | NM_017934       | PSG5      |
| 8037272 | 1,53 | 2,90 | 0,07141 | -1,83 | -3,54 | 0,00638 | NM_002781       | MAPRE3    |
| 8040742 | 1,53 | 2,89 | 0,08460 | 2,28  | 4,87  | 0,00600 | NM_012326       | C10orf88  |
| 7936817 | 1,53 | 2,89 | 0,07911 | 2,18  | 4,54  | 0,01758 | NM_024942       | ATG5      |
| 8128592 | 1,53 | 2,89 | 0,04699 | 1,76  | 3,38  | 0,00779 | NM_004849       | POGZ      |
| 7920000 | 1,53 | 2,89 | 0,00099 | 2,18  | 4,54  | 0,00818 | NM_015100       | BRCC3     |
| 8171006 | 1,53 | 2,89 | 0,03249 | 2,04  | 4,12  | 0,00760 | NM_024332       | SHMT2     |
| 7956401 | 1,53 | 2,89 | 0,02449 | 4,46  | 21,94 | 0,00064 | NM_005412       | FUT8      |
| 7975136 | 1,53 | 2,89 | 0,01597 | 2,56  | 5,90  | 0,00074 | NM_178155       | BOD1L     |
| 8099410 | 1,53 | 2,89 | 0,00756 | 1,50  | 2,83  | 0,00322 | NM_148894       | SMAD1     |
| 8097657 | 1,53 | 2,89 | 0,08241 | 1,56  | 2,95  | 0,01290 | NM_005900       | GSPT2     |
| 8167654 | 1,53 | 2,89 | 0,01996 | 1,36  | 2,57  | 0,00755 | NM_018094       | KIAA0391  |
| 7973924 | 1,53 | 2,88 | 0,10782 | 2,83  | 7,13  | 0,00214 | NM_014672       | GGPS1     |
| 7910640 | 1,53 | 2,88 | 0,00162 | 0,76  | 1,69  | 0,26101 | NM_004837       | H1FO      |
| 8072926 | 1,53 | 2,88 | 0,01073 | 1,18  | 2,27  | 0,15997 | NM_005318       | CERCAM    |
| 8158250 | 1,53 | 2,88 | 0,00947 | 2,63  | 6,20  | 0,00355 | NM_016174       | RBM26     |
| 7972190 | 1,53 | 2,88 | 0,00461 | 2,06  | 4,18  | 0,01415 | NM_022118       | AGPHD1    |
| 7985192 | 1,53 | 2,88 | 0,00539 | 2,99  | 7,96  | 0,00289 | NM_001013619    | ITGB1BP1  |
| 8050176 | 1,53 | 2,88 | 0,14354 | 3,49  | 11,27 | 0,00082 | NM_004763       | GNL3      |
| 8080419 | 1,53 | 2,88 | 0,05944 | 1,83  | 3,55  | 0,00881 | NM_206825       | WDR61     |
| 7990700 | 1,53 | 2,88 | 0,03409 | 1,27  | 2,42  | 0,00816 | NM_025234       | CUL5      |
| 7943580 | 1,53 | 2,88 | 0,03931 | 3,18  | 9,05  | 0,00006 | NM_003478       | ECT2      |
| 8083941 | 1,52 | 2,88 | 0,01287 | 3,44  | 10,87 | 0,00929 | NM_018098       | TAF12     |
| 7914218 | 1,52 | 2,88 | 0,02565 | 1,96  | 3,88  | 0,00478 | NM_001135218    | HSPA1A    |
| 8118310 | 1,52 | 2,88 | 0,01262 | 2,88  | 7,36  | 0,00230 | NM_005345       | ALDH1A3   |
| 7986446 | 1,52 | 2,88 | 0,04785 | 0,56  | 1,47  | 0,18581 | NM_000693       | HNRNPA2B1 |
| 8138670 | 1,52 | 2,87 | 0,03360 | 1,92  | 3,78  | 0,00013 | NM_031243       | RBM24     |
| 8117045 | 1,52 | 2,87 | 0,03756 | 1,79  | 3,46  | 0,00012 | NM_001143942    | RPS26P11  |
| 8168357 | 1,52 | 2,87 | 0,00451 | -0,34 | -1,27 | 0,25039 | NR_002309       | MMP16     |
| 8151684 | 1,52 | 2,87 | 0,05007 | -2,16 | -4,47 | 0,00377 | AL136588 LRRC49 |           |
| 7984569 | 1,52 | 2,87 | 0,09243 | 1,49  | 2,81  | 0,03133 | NM_017691       | FBXO5     |
| 8130374 | 1,52 | 2,87 | 0,03616 | 1,88  | 3,68  | 0,02038 | NM_012177       | PKNOX1    |
| 8068866 | 1,52 | 2,87 | 0,03004 | 1,60  | 3,04  | 0,02493 | NM_004571       | GLCE      |

|         |      |      |         |       |        |         |                 |            |
|---------|------|------|---------|-------|--------|---------|-----------------|------------|
| 7984517 | 1,52 | 2,87 | 0,06077 | 2,83  | 7,09   | 0,00197 | NM_015554       | UBFD1      |
| 7994095 | 1,52 | 2,87 | 0,03423 | 1,41  | 2,66   | 0,00401 | NM_019116       | PISD       |
| 8075529 | 1,52 | 2,87 | 0,00013 | 1,78  | 3,45   | 0,02632 | NM_014338       | PTPRA      |
| 8060539 | 1,52 | 2,87 | 0,00354 | 0,61  | 1,53   | 0,02462 | NM_002836       | ---        |
| 7902306 | 1,52 | 2,87 | 0,02444 | 0,31  | 1,24   | 0,62522 | ---             | MYD88      |
| 8078729 | 1,52 | 2,87 | 0,07371 | 3,03  | 8,16   | 0,00040 | NM_001172567    | LYRM4      |
| 8123728 | 1,52 | 2,87 | 0,03317 | 2,47  | 5,55   | 0,00014 | NM_020408       | AKT1       |
| 7981494 | 1,52 | 2,87 | 0,02210 | 3,37  | 10,36  | 0,00182 | NM_001014432    | GUSBP3     |
| 8124469 | 1,52 | 2,86 | 0,01812 | 2,57  | 5,93   | 0,00085 | NR_027386       | CNPY4      |
| 8134730 | 1,52 | 2,86 | 0,10371 | 0,59  | 1,50   | 0,24328 | NM_152755       | C10orf28   |
| 7929719 | 1,52 | 2,86 | 0,03783 | 1,31  | 2,49   | 0,01622 | NM_014472       | POM121     |
| 8133331 | 1,52 | 2,86 | 0,00009 | 2,05  | 4,14   | 0,00023 | NM_172020       | SEC24C     |
| 7928369 | 1,52 | 2,86 | 0,03513 | 2,16  | 4,47   | 0,00003 | NM_004922       | TPT1       |
| 7971375 | 1,52 | 2,86 | 0,00162 | 1,70  | 3,25   | 0,03075 | NM_003295       | KIAA0232   |
| 8093961 | 1,51 | 2,86 | 0,01453 | 1,25  | 2,38   | 0,00104 | NM_014743       | CNOT6L     |
| 8101228 | 1,51 | 2,86 | 0,14798 | 2,82  | 7,05   | 0,00202 | NM_144571       | ZNF397     |
| 8020889 | 1,51 | 2,86 | 0,00776 | 0,74  | 1,67   | 0,16294 | NM_001135178    | ZNF638     |
| 8042601 | 1,51 | 2,86 | 0,02201 | 2,25  | 4,76   | 0,00224 | NM_014497       | ZNF398     |
| 8137091 | 1,51 | 2,86 | 0,01117 | 1,41  | 2,65   | 0,00041 | NM_170686       | JMJD6      |
| 8018793 | 1,51 | 2,85 | 0,03146 | 2,07  | 4,19   | 0,00261 | NM_001081461    | ZNF56      |
| 8027239 | 1,51 | 2,85 | 0,01289 | 0,95  | 1,93   | 0,06095 | ENST00000341262 | PTPN2      |
| 8022393 | 1,51 | 2,85 | 0,01975 | 2,07  | 4,19   | 0,02537 | NM_002828       | MPZL1      |
| 7907092 | 1,51 | 2,85 | 0,00659 | 2,44  | 5,42   | 0,00001 | NM_003953       | EPB41      |
| 7899534 | 1,51 | 2,85 | 0,05643 | 2,03  | 4,09   | 0,00038 | NM_001166005    | POTEF      |
| 8045321 | 1,51 | 2,85 | 0,03877 | 0,45  | 1,37   | 0,10741 | NM_001099771    | ALG5       |
| 7971027 | 1,51 | 2,85 | 0,07764 | 1,67  | 3,18   | 0,00116 | NM_013338       | IQCB1      |
| 8089954 | 1,51 | 2,85 | 0,05579 | 2,41  | 5,33   | 0,00070 | NM_001023570    | NCRNA00219 |
| 8107321 | 1,51 | 2,85 | 0,01587 | 2,48  | 5,58   | 0,00718 | NR_015370       | PLAA       |
| 8160487 | 1,51 | 2,85 | 0,00078 | 2,42  | 5,37   | 0,00082 | NM_001031689    | SRRM2      |
| 7992692 | 1,51 | 2,85 | 0,04165 | 2,22  | 4,65   | 0,02173 | NM_016333       | MYO9A      |
| 7990092 | 1,51 | 2,85 | 0,04467 | 3,15  | 8,87   | 0,00088 | NM_006901       | GSTO1      |
| 7930304 | 1,51 | 2,85 | 0,05737 | 1,67  | 3,18   | 0,00608 | NM_004832       | ---        |
| 8127423 | 1,51 | 2,85 | 0,22301 | -3,53 | -11,54 | 0,05426 | ---             | ---        |
| 7932209 | 1,51 | 2,85 | 0,12340 | 1,20  | 2,30   | 0,10247 | ---             | CDK13      |
| 8132417 | 1,51 | 2,85 | 0,01938 | 2,89  | 7,41   | 0,00001 | NM_003718       | HSPA1A     |
| 8179322 | 1,51 | 2,84 | 0,01298 | 2,72  | 6,59   | 0,00196 | NM_005345       | CTH        |
| 7902290 | 1,51 | 2,84 | 0,12376 | 4,93  | 30,47  | 0,00048 | NM_001902       | ETNK2      |
| 7923596 | 1,51 | 2,84 | 0,13394 | 1,87  | 3,66   | 0,00020 | NM_018208       | LARP1      |
| 8109438 | 1,51 | 2,84 | 0,01174 | 2,12  | 4,34   | 0,00357 | NM_015315       | ATR        |
| 8091190 | 1,51 | 2,84 | 0,01395 | 2,77  | 6,83   | 0,00721 | NM_001184       | CFHR1      |
| 7908488 | 1,50 | 2,84 | 0,00061 | -0,90 | -1,87  | 0,08900 | NM_002113       | RFTN1      |
| 8085665 | 1,50 | 2,84 | 0,22085 | 0,16  | 1,11   | 0,54801 | NM_015150       | MTA3       |
| 8041617 | 1,50 | 2,84 | 0,02217 | 2,11  | 4,32   | 0,00771 | NM_020744       | C10orf76   |
| 7935951 | 1,50 | 2,84 | 0,00491 | 2,60  | 6,07   | 0,00053 | NM_024541       | NPIP       |
| 7993349 | 1,50 | 2,84 | 0,15020 | 2,53  | 5,79   | 0,00006 | NM_006985       | SKA2       |
| 8017133 | 1,50 | 2,83 | 0,03867 | 3,39  | 10,50  | 0,00039 | NM_182620       | VPS13D     |
| 7897890 | 1,50 | 2,83 | 0,01867 | 1,80  | 3,49   | 0,00016 | NM_015378       | KIF3A      |
| 8114030 | 1,50 | 2,83 | 0,00971 | 0,77  | 1,71   | 0,03938 | NM_007054       | NT5DC2     |
| 8087935 | 1,50 | 2,83 | 0,01418 | 2,43  | 5,37   | 0,00120 | NM_022908       | C11orf24   |
| 7949948 | 1,50 | 2,83 | 0,03145 | 2,49  | 5,60   | 0,00003 | NM_022338       | ZNF876P    |
| 8093332 | 1,50 | 2,83 | 0,06426 | 0,02  | 1,01   | 0,97033 | NR_027481       | TMX2       |
| 7940066 | 1,50 | 2,83 | 0,01980 | 3,20  | 9,20   | 0,00088 | NM_015959       | DDIT3      |
| 7964460 | 1,50 | 2,83 | 0,02106 | 3,48  | 11,13  | 0,00378 | NM_004083       | ---        |
| 7978905 | 1,50 | 2,83 | 0,43674 | -1,09 | -2,13  | 0,01498 | ---             | HMGCL      |
| 7913682 | 1,50 | 2,83 | 0,03650 | 1,78  | 3,42   | 0,00036 | NM_000191       | PIGX       |
| 8084955 | 1,50 | 2,83 | 0,06992 | 2,61  | 6,10   | 0,00762 | NM_001166304    | CLK1       |
| 8058127 | 1,50 | 2,82 | 0,00799 | 1,13  | 2,19   | 0,07022 | NR_027856       | TRMT6      |
| 8064879 | 1,50 | 2,82 | 0,01167 | 2,23  | 4,70   | 0,00033 | NM_015939       | HEATR5B    |
| 8051464 | 1,50 | 2,82 | 0,02651 | 2,53  | 5,78   | 0,00124 | NM_019024       | SPATA18    |
| 8095021 | 1,50 | 2,82 | 0,05696 | -1,73 | -3,31  | 0,00284 | NM_145263       | COMMD6     |
| 7972044 | 1,50 | 2,82 | 0,00796 | 0,84  | 1,80   | 0,05483 | NM_203497       | JOSD1      |
| 8076128 | 1,50 | 2,82 | 0,11059 | 4,02  | 16,20  | 0,00045 | NM_014876       | ---        |
| 8059672 | 1,50 | 2,82 | 0,24709 | 3,58  | 11,97  | 0,00003 | ---             | KRCC1      |
| 8053648 | 1,50 | 2,82 | 0,03153 | 1,58  | 2,99   | 0,02784 | NM_016618       | FAM120AOS  |
| 8162466 | 1,50 | 2,82 | 0,02449 | 2,46  | 5,52   | 0,00097 | NM_198841       | CMTM7      |
| 8078405 | 1,50 | 2,82 | 0,00440 | 2,87  | 7,29   | 0,00540 | NM_138410       | DNAJB14    |
| 7989885 | 1,50 | 2,82 | 0,02855 | 1,13  | 2,19   | 0,00108 | NM_001031723    | ZNF431     |
| 8027292 | 1,49 | 2,82 | 0,01330 | 2,31  | 4,95   | 0,00083 | NM_133473       | SMG1       |
| 8000167 | 1,49 | 2,82 | 0,01292 | 2,44  | 5,41   | 0,00092 | NM_015092       | ELAVL1     |
| 8033479 | 1,49 | 2,82 | 0,01667 | 3,08  | 8,43   | 0,00010 | NM_001419       | CADPS      |
| 8088491 | 1,49 | 2,82 | 0,03908 | -1,08 | -2,12  | 0,00439 | NM_003716       | RHBDD2     |
| 8133662 | 1,49 | 2,81 | 0,07261 | 2,42  | 5,36   | 0,00138 | NM_001040457    | WBSCR22    |
| 8133345 | 1,49 | 2,81 | 0,00133 | 2,56  | 5,88   | 0,00188 | NM_017528       | SNRPB2     |

|         |      |      |         |       |       |         |                 |           |
|---------|------|------|---------|-------|-------|---------|-----------------|-----------|
| 8061075 | 1,49 | 2,81 | 0,10049 | 2,77  | 6,84  | 0,00311 | NM_003092       | CCDC71    |
| 8087372 | 1,49 | 2,81 | 0,21303 | 3,02  | 8,09  | 0,00004 | NM_022903       | FAM122B   |
| 8175269 | 1,49 | 2,81 | 0,03514 | 1,36  | 2,56  | 0,00210 | NM_001166599    | C3orf10   |
| 8085287 | 1,49 | 2,81 | 0,01102 | 0,64  | 1,56  | 0,20130 | NM_018462       | MRPL44    |
| 8048752 | 1,49 | 2,81 | 0,07196 | 1,86  | 3,62  | 0,00970 | NM_022915       | ZNF681    |
| 8035855 | 1,49 | 2,81 | 0,00037 | 1,59  | 3,01  | 0,02628 | NM_138286       | SLC12A6   |
| 7987192 | 1,49 | 2,81 | 0,00725 | 1,80  | 3,48  | 0,00019 | NM_001042496    | CDC37     |
| 8034021 | 1,49 | 2,81 | 0,01029 | 3,62  | 12,32 | 0,00175 | NM_007065       | SCYL1     |
| 7941274 | 1,49 | 2,81 | 0,00753 | 2,30  | 4,91  | 0,01226 | NM_020680       | POLR3K    |
| 7998129 | 1,49 | 2,81 | 0,07139 | 1,80  | 3,48  | 0,00068 | NM_016310       | HOXA6     |
| 8138741 | 1,49 | 2,81 | 0,00876 | 2,50  | 5,66  | 0,00952 | NM_024014       | PGBD4     |
| 7982504 | 1,49 | 2,80 | 0,04442 | 2,43  | 5,37  | 0,00199 | NM_152595       | C6orf70   |
| 8123467 | 1,49 | 2,80 | 0,05526 | 2,37  | 5,18  | 0,00570 | NM_018341       | SCAI      |
| 8164131 | 1,49 | 2,80 | 0,02867 | 1,89  | 3,71  | 0,01751 | NM_173690       | THOC4     |
| 8019273 | 1,49 | 2,80 | 0,02749 | 2,90  | 7,48  | 0,00122 | NM_005782       | LOC388022 |
| 7977270 | 1,49 | 2,80 | 0,19787 | 2,61  | 6,09  | 0,02897 | AK131040 ALG11  |           |
| 7969228 | 1,49 | 2,80 | 0,03432 | 2,48  | 5,59  | 0,00145 | NM_001004127    | HNRNPA1L2 |
| 7969263 | 1,49 | 2,80 | 0,04857 | 2,77  | 6,84  | 0,00095 | NM_001011724    | EIF4B     |
| 7963575 | 1,49 | 2,80 | 0,05185 | 0,41  | 1,33  | 0,31704 | NM_001417       | ALPL      |
| 7898693 | 1,48 | 2,80 | 0,14901 | -1,27 | -2,42 | 0,04675 | NM_000478       | PAK1IP1   |
| 8116848 | 1,48 | 2,80 | 0,04712 | 3,28  | 9,73  | 0,00036 | NM_017906       | ZFP36L1   |
| 7979813 | 1,48 | 2,80 | 0,03709 | 2,31  | 4,96  | 0,00094 | NM_004926       | HNRNPU    |
| 7925565 | 1,48 | 2,80 | 0,01539 | 1,40  | 2,64  | 0,00907 | NM_031844       | MXRA7     |
| 8056217 | 1,48 | 2,80 | 0,24284 | 3,32  | 9,97  | 0,00167 | NM_198530       | ATP5G2    |
| 7963713 | 1,48 | 2,80 | 0,04106 | 1,81  | 3,50  | 0,00888 | NM_005176       | TMEM214   |
| 8040753 | 1,48 | 2,80 | 0,06185 | 2,50  | 5,65  | 0,00012 | NM_017727       | WNT2      |
| 8142471 | 1,48 | 2,80 | 0,08615 | -0,79 | -1,72 | 0,00422 | NM_003391       | ZNF605    |
| 7967863 | 1,48 | 2,80 | 0,03495 | 1,59  | 3,00  | 0,03796 | NM_183238       | HINT1     |
| 8113873 | 1,48 | 2,80 | 0,01371 | 1,44  | 2,72  | 0,00485 | NM_005340       | PDE4DIP   |
| 7904965 | 1,48 | 2,80 | 0,06380 | -1,77 | -3,42 | 0,04957 | AB042555 FBXW11 |           |
| 8115765 | 1,48 | 2,79 | 0,02559 | 2,64  | 6,22  | 0,00005 | NM_033644       | ZNF75A    |
| 7992877 | 1,48 | 2,79 | 0,04388 | 2,25  | 4,75  | 0,00429 | NM_153028       | ARPC1B    |
| 8134552 | 1,48 | 2,79 | 0,02120 | 4,38  | 20,82 | 0,00079 | NM_005720       | SH3KBP1   |
| 8171684 | 1,48 | 2,79 | 0,02390 | 2,75  | 6,72  | 0,00834 | NM_031892       | SRPK2     |
| 8142036 | 1,48 | 2,79 | 0,01375 | 1,76  | 3,38  | 0,00044 | NM_182691       | SHC3      |
| 8162216 | 1,48 | 2,79 | 0,01749 | -0,19 | -1,14 | 0,19044 | NM_016848       | TBC1D5    |
| 8085689 | 1,48 | 2,79 | 0,02124 | 2,02  | 4,06  | 0,00917 | NM_014744       | GALNT7    |
| 8098328 | 1,48 | 2,79 | 0,03168 | 2,16  | 4,47  | 0,00060 | NM_017423       | ---       |
| 8056728 | 1,48 | 2,79 | 0,06985 | 0,64  | 1,56  | 0,36081 | ---             | POTEE     |
| 8055220 | 1,48 | 2,79 | 0,07146 | -0,37 | -1,29 | 0,04719 | NM_001083538    | KDSR      |
| 8023656 | 1,48 | 2,79 | 0,03627 | 1,23  | 2,35  | 0,01026 | NM_002035       | ---       |
| 8031899 | 1,48 | 2,79 | 0,07169 | 3,91  | 15,04 | 0,00003 | ---             | OSBPL11   |
| 8090277 | 1,48 | 2,78 | 0,05354 | 3,22  | 9,30  | 0,00031 | NM_022776       | KLF7      |
| 8058477 | 1,48 | 2,78 | 0,02822 | 1,39  | 2,62  | 0,00607 | NM_003709       | FAM126B   |
| 8058182 | 1,48 | 2,78 | 0,01250 | 2,48  | 5,57  | 0,00022 | NM_173822       | SLC25A6   |
| 8171111 | 1,48 | 2,78 | 0,03535 | 3,31  | 9,90  | 0,00093 | NM_001636       | SLC25A6   |
| 8177003 | 1,48 | 2,78 | 0,03535 | 3,31  | 9,90  | 0,00093 | NM_001636       | KIAA1267  |
| 8016266 | 1,48 | 2,78 | 0,05255 | 2,05  | 4,15  | 0,00016 | NM_015443       | CA5B      |
| 8166184 | 1,47 | 2,78 | 0,08185 | 1,57  | 2,96  | 0,04420 | NM_007220       | TMEM205   |
| 8034210 | 1,47 | 2,78 | 0,03505 | 3,76  | 13,54 | 0,00091 | NM_198536       | PLEKHA5   |
| 7954245 | 1,47 | 2,78 | 0,00391 | 1,76  | 3,39  | 0,00059 | NM_019012       | GPRC5B    |
| 7999909 | 1,47 | 2,78 | 0,01483 | 2,49  | 5,64  | 0,00780 | NM_016235       | STK24     |
| 7972444 | 1,47 | 2,78 | 0,07489 | 2,59  | 6,03  | 0,00038 | NM_003576       | NLGN1     |
| 8083968 | 1,47 | 2,78 | 0,04013 | -1,12 | -2,17 | 0,03907 | NM_014932       | CBWD1     |
| 8159815 | 1,47 | 2,78 | 0,00269 | 1,39  | 2,62  | 0,00935 | NM_001145355    | ATP6V1D   |
| 7979698 | 1,47 | 2,77 | 0,05228 | 2,41  | 5,30  | 0,00035 | NM_015994       | AGTRAP    |
| 7897745 | 1,47 | 2,77 | 0,00510 | 2,58  | 5,97  | 0,00501 | NM_020350       | NUDT3     |
| 8125825 | 1,47 | 2,77 | 0,00633 | 2,98  | 7,89  | 0,00019 | NM_006703       | CHUK      |
| 7935707 | 1,47 | 2,77 | 0,04117 | 3,07  | 8,42  | 0,00028 | NM_001278       | CLUL1     |
| 8019831 | 1,47 | 2,77 | 0,00432 | 0,07  | 1,05  | 0,76401 | NM_014410       | MRPL9     |
| 7920047 | 1,47 | 2,77 | 0,00100 | 3,30  | 9,88  | 0,00062 | NM_031420       | WDR7      |
| 8021312 | 1,47 | 2,77 | 0,02496 | 1,62  | 3,07  | 0,00079 | NM_015285       | EXOSC4    |
| 8148710 | 1,47 | 2,77 | 0,06961 | 2,43  | 5,40  | 0,00082 | NM_019037       | PNPO      |
| 8008064 | 1,47 | 2,77 | 0,07679 | 3,45  | 10,90 | 0,00383 | NM_018129       | RALA      |
| 8132406 | 1,47 | 2,77 | 0,02528 | 1,41  | 2,65  | 0,00080 | NM_005402       | PART1     |
| 8105495 | 1,47 | 2,77 | 0,06240 | -1,37 | -2,59 | 0,00447 | NR_028508       | FAM173B   |
| 8110966 | 1,47 | 2,77 | 0,06660 | 2,14  | 4,40  | 0,00224 | NM_199133       | NUDC      |
| 7899273 | 1,47 | 2,77 | 0,00756 | 1,98  | 3,93  | 0,00777 | NM_006600       | LIN7A     |
| 7965156 | 1,47 | 2,77 | 0,08562 | -1,65 | -3,13 | 0,01770 | NM_004664       | STAR3     |
| 8006877 | 1,47 | 2,77 | 0,01891 | 3,14  | 8,81  | 0,01086 | NM_006804       | GHR       |
| 8105121 | 1,47 | 2,77 | 0,10542 | -0,83 | -1,78 | 0,12646 | NM_000163       | ABL2      |
| 7922610 | 1,47 | 2,77 | 0,02233 | 2,09  | 4,25  | 0,00017 | NM_007314       | VANGL1    |
| 7904211 | 1,47 | 2,77 | 0,00830 | 2,31  | 4,96  | 0,00003 | NM_138959       | RNF26     |

|         |      |      |         |       |       |         |               |          |
|---------|------|------|---------|-------|-------|---------|---------------|----------|
| 7944510 | 1,47 | 2,76 | 0,09210 | 3,59  | 12,04 | 0,00042 | NM_032015     | ZC3H11A  |
| 7908978 | 1,47 | 2,76 | 0,29211 | 4,09  | 17,02 | 0,00015 | NM_014827     | TLE1     |
| 8161919 | 1,47 | 2,76 | 0,07528 | 3,45  | 10,89 | 0,00051 | NM_005077     | C10orf10 |
| 7933204 | 1,46 | 2,76 | 0,06841 | -0,44 | -1,36 | 0,01213 | NM_007021     | FUBP1    |
| 7917156 | 1,46 | 2,76 | 0,05304 | 2,25  | 4,75  | 0,00166 | NM_003902     | EPS15L1  |
| 8035120 | 1,46 | 2,76 | 0,01365 | 2,76  | 6,79  | 0,02751 | NM_021235     | USP33    |
| 7917120 | 1,46 | 2,76 | 0,08136 | 1,64  | 3,12  | 0,00281 | NM_015017     | AP1S2    |
| 8017210 | 1,46 | 2,76 | 0,02734 | 2,06  | 4,18  | 0,00021 | NM_003916     | IQCG     |
| 8093258 | 1,46 | 2,76 | 0,02506 | 1,49  | 2,80  | 0,02396 | NM_032263     | ZNF160   |
| 8039034 | 1,46 | 2,76 | 0,06526 | 1,35  | 2,56  | 0,00251 | NM_001102603  | KCTD9    |
| 8149857 | 1,46 | 2,76 | 0,22920 | 0,32  | 1,25  | 0,51203 | NM_017634     | BCL2L1   |
| 8065569 | 1,46 | 2,75 | 0,02820 | 2,46  | 5,52  | 0,00430 | NM_138578     | LMBR1    |
| 8144089 | 1,46 | 2,75 | 0,20269 | 4,03  | 16,29 | 0,00002 | NM_022458     | COX8A    |
| 7940835 | 1,46 | 2,75 | 0,00083 | 1,66  | 3,17  | 0,04780 | NM_004074     | PACRGL   |
| 8094342 | 1,46 | 2,75 | 0,03139 | 3,23  | 9,40  | 0,00154 | NM_145048     | TMSL2    |
| 8050089 | 1,46 | 2,75 | 0,01086 | -1,00 | -2,00 | 0,25032 | BC104197 NFYC |          |
| 7900468 | 1,46 | 2,75 | 0,01400 | 2,47  | 5,53  | 0,00004 | NM_001142588  | NCOA2    |
| 8151254 | 1,46 | 2,75 | 0,04669 | 2,83  | 7,14  | 0,00101 | NM_006540     | CHD8     |
| 7977693 | 1,46 | 2,75 | 0,07534 | 3,04  | 8,25  | 0,00044 | NM_020920     | TBCE     |
| 7910651 | 1,46 | 2,74 | 0,05056 | 2,58  | 5,97  | 0,00072 | NM_001079515  | PDE1C    |
| 8138888 | 1,46 | 2,74 | 0,00930 | -0,87 | -1,82 | 0,01465 | NM_005020     | RAB30    |
| 7950743 | 1,45 | 2,74 | 0,03638 | 0,50  | 1,41  | 0,22027 | NM_014488     | SRGAP2   |
| 7904482 | 1,45 | 2,74 | 0,12484 | 2,50  | 5,65  | 0,00051 | NM_015326     | EFHA1    |
| 7970546 | 1,45 | 2,74 | 0,04888 | 2,64  | 6,21  | 0,00322 | NM_152726     | MOCOS    |
| 8020955 | 1,45 | 2,74 | 0,05298 | 3,28  | 9,70  | 0,00000 | NM_017947     | DUSP12   |
| 7906810 | 1,45 | 2,74 | 0,02544 | 3,65  | 12,53 | 0,00006 | NM_007240     | NPNT     |
| 8096704 | 1,45 | 2,74 | 0,07986 | -0,58 | -1,49 | 0,02911 | NM_001033047  | AUP1     |
| 8053214 | 1,45 | 2,74 | 0,01408 | 3,05  | 8,25  | 0,00202 | NM_181575     | UQCRH    |
| 7901212 | 1,45 | 2,74 | 0,02859 | 1,09  | 2,12  | 0,14350 | NM_006004     | XPNPEP3  |
| 8073311 | 1,45 | 2,74 | 0,03761 | 1,19  | 2,29  | 0,00564 | NM_022098     | FUNDC2   |
| 8171001 | 1,45 | 2,74 | 0,15155 | 2,64  | 6,22  | 0,01500 | NM_023934     | LRP12    |
| 8152280 | 1,45 | 2,73 | 0,00930 | 3,53  | 11,58 | 0,00005 | NM_013437     | ---      |
| 8170418 | 1,45 | 2,73 | 0,04745 | 1,60  | 3,04  | 0,05378 | --- ELAC2     |          |
| 8012856 | 1,45 | 2,73 | 0,00537 | 2,34  | 5,05  | 0,00086 | NM_018127     | CORO2B   |
| 7984475 | 1,45 | 2,73 | 0,03031 | -0,02 | -1,01 | 0,94328 | NM_006091     | HIST1H3E |
| 8117415 | 1,45 | 2,73 | 0,08231 | -0,79 | -1,73 | 0,00975 | NM_003532     | FAM40A   |
| 7903827 | 1,45 | 2,73 | 0,05833 | 2,87  | 7,30  | 0,00138 | NM_033088     | ATXN7L3  |
| 8015955 | 1,45 | 2,73 | 0,04061 | 2,41  | 5,32  | 0,00038 | NM_020218     | RPA1     |
| 8003679 | 1,45 | 2,73 | 0,00888 | 2,37  | 5,18  | 0,00007 | NM_002945     | MGC72080 |
| 8045887 | 1,45 | 2,73 | 0,38080 | 0,94  | 1,91  | 0,27589 | NR_002822     | NPIP     |
| 7993359 | 1,45 | 2,73 | 0,16863 | 2,48  | 5,59  | 0,00005 | NM_006985     | TMTC4    |
| 7972579 | 1,45 | 2,73 | 0,06262 | 4,30  | 19,63 | 0,00012 | NM_032813     | REV1     |
| 8054227 | 1,45 | 2,73 | 0,00716 | 3,29  | 9,78  | 0,00051 | NM_016316     | NEK1     |
| 8103646 | 1,45 | 2,73 | 0,00433 | 0,47  | 1,38  | 0,31594 | NM_012224     | TACC1    |
| 8145954 | 1,45 | 2,73 | 0,01870 | 1,88  | 3,67  | 0,01160 | NM_006283     | PTPN14   |
| 7924207 | 1,45 | 2,72 | 0,05297 | 2,75  | 6,71  | 0,00006 | NM_005401     | EFHC1    |
| 8120222 | 1,45 | 2,72 | 0,02575 | 1,20  | 2,30  | 0,00931 | NR_033327     | RWDD2A   |
| 8120927 | 1,45 | 2,72 | 0,08438 | 1,33  | 2,52  | 0,01104 | NM_033411     | SIRT1    |
| 7927814 | 1,45 | 2,72 | 0,04197 | 2,09  | 4,27  | 0,00248 | NM_012238     | CARS2    |
| 7972810 | 1,45 | 2,72 | 0,01184 | 0,87  | 1,82  | 0,06416 | NM_024537     | MST4     |
| 8169949 | 1,44 | 2,72 | 0,00271 | 2,66  | 6,34  | 0,00081 | NM_016542     | SMG1     |
| 8000687 | 1,44 | 2,72 | 0,10336 | 1,80  | 3,48  | 0,11295 | NM_015092     | KDM6A    |
| 8166956 | 1,44 | 2,72 | 0,03407 | 2,73  | 6,62  | 0,00014 | NM_021140     | CRK      |
| 8011018 | 1,44 | 2,72 | 0,07683 | 3,07  | 8,40  | 0,00009 | NM_016823     | HNMT     |
| 8045499 | 1,44 | 2,72 | 0,05016 | -0,55 | -1,46 | 0,00172 | NM_006895     | FNBP1L   |
| 7903092 | 1,44 | 2,72 | 0,01970 | 3,14  | 8,79  | 0,00014 | NM_001024948  | C20orf94 |
| 8060977 | 1,44 | 2,72 | 0,00456 | 1,03  | 2,04  | 0,04809 | NM_001009608  | TMEM164  |
| 8169365 | 1,44 | 2,72 | 0,00125 | 2,80  | 6,95  | 0,00084 | NM_032227     | SNAPC1   |
| 7974870 | 1,44 | 2,72 | 0,02624 | 3,09  | 8,53  | 0,00447 | NM_003082     | C16orf70 |
| 7996403 | 1,44 | 2,71 | 0,09432 | 3,13  | 8,74  | 0,00027 | NM_025187     | ARSK     |
| 8106962 | 1,44 | 2,71 | 0,09335 | 2,19  | 4,58  | 0,00643 | NM_198150     | PPP1R12B |
| 7908841 | 1,44 | 2,71 | 0,08387 | 0,71  | 1,64  | 0,06536 | NM_032105     | EP300    |
| 8073345 | 1,44 | 2,71 | 0,04099 | 3,25  | 9,54  | 0,00083 | NM_001429     | KRTAP1-1 |
| 8015187 | 1,44 | 2,71 | 0,02969 | -2,70 | -6,50 | 0,00624 | NM_030967     | KLF10    |
| 8152215 | 1,44 | 2,71 | 0,00432 | 0,11  | 1,08  | 0,46092 | NM_005655     | CDC42BPB |
| 7981387 | 1,44 | 2,71 | 0,02867 | 4,04  | 16,49 | 0,00057 | NM_006035     | MGC72080 |
| 7971241 | 1,44 | 2,71 | 0,38388 | 0,89  | 1,85  | 0,27917 | NR_002822     | PSG4     |
| 8037283 | 1,44 | 2,71 | 0,13979 | -2,51 | -5,68 | 0,01103 | NM_002780     | WDR70    |
| 8104998 | 1,44 | 2,71 | 0,03243 | 1,40  | 2,64  | 0,01110 | NM_018034     | CENPE    |
| 8102076 | 1,44 | 2,71 | 0,00578 | 0,81  | 1,76  | 0,12178 | NM_001813     | SLC35A4  |
| 8108558 | 1,44 | 2,71 | 0,17516 | 3,07  | 8,41  | 0,00422 | NM_080670     | UBE2N    |
| 7965471 | 1,44 | 2,71 | 0,16052 | 1,37  | 2,59  | 0,02259 | NM_003348     | UTP15    |
| 8106193 | 1,44 | 2,71 | 0,12402 | 2,63  | 6,18  | 0,00071 | NM_032175     | PLCE1    |

|         |      |      |         |       |       |         |              |          |
|---------|------|------|---------|-------|-------|---------|--------------|----------|
| 7929388 | 1,44 | 2,71 | 0,01508 | 1,24  | 2,37  | 0,00050 | NM_016341    | GSTA4    |
| 8127094 | 1,44 | 2,71 | 0,06501 | 1,89  | 3,70  | 0,00760 | NM_001512    | KIAA0100 |
| 8013696 | 1,44 | 2,70 | 0,03837 | 3,15  | 8,88  | 0,00007 | NM_014680    | SNX19    |
| 7952768 | 1,44 | 2,70 | 0,00758 | 2,41  | 5,33  | 0,00379 | NM_014758    | ---      |
| 8090507 | 1,44 | 2,70 | 0,11851 | 1,14  | 2,20  | 0,00974 | ---          | PLSCR3   |
| 8012197 | 1,43 | 2,70 | 0,01726 | 2,50  | 5,67  | 0,00625 | NM_020360    | HLA-E    |
| 8117890 | 1,43 | 2,70 | 0,00864 | 2,68  | 6,40  | 0,00544 | NM_005516    | CYTH2    |
| 8030049 | 1,43 | 2,70 | 0,06151 | 3,04  | 8,25  | 0,00097 | NM_017457    | RPS7     |
| 8040036 | 1,43 | 2,70 | 0,00357 | 1,29  | 2,45  | 0,03727 | NM_001011    | GEMIN5   |
| 8115410 | 1,43 | 2,70 | 0,00534 | 2,17  | 4,51  | 0,00606 | NM_015465    | ZNF37A   |
| 7927071 | 1,43 | 2,70 | 0,01079 | 2,52  | 5,72  | 0,00131 | NM_001007094 | TUBD1    |
| 8017150 | 1,43 | 2,70 | 0,09319 | 2,57  | 5,95  | 0,00044 | NM_016261    | ZNF317   |
| 8025458 | 1,43 | 2,70 | 0,01752 | 3,24  | 9,47  | 0,00009 | NM_020933    | LRCH3    |
| 8085000 | 1,43 | 2,69 | 0,08230 | 1,83  | 3,56  | 0,00408 | NM_032773    | MTHFD1L  |
| 8155630 | 1,43 | 2,69 | 0,03180 | 0,59  | 1,50  | 0,13039 | NM_015440    | MTHFD1L  |
| 8161377 | 1,43 | 2,69 | 0,03180 | 0,59  | 1,50  | 0,13039 | NM_015440    | RPL12    |
| 8047635 | 1,43 | 2,69 | 0,06066 | 1,20  | 2,30  | 0,00103 | NM_000976    | KIAA1012 |
| 8022767 | 1,43 | 2,69 | 0,08706 | 3,17  | 9,00  | 0,00032 | NM_014939    | TOR1A    |
| 8164587 | 1,43 | 2,69 | 0,00739 | 1,81  | 3,51  | 0,00000 | NM_000113    | SALL1    |
| 8001387 | 1,43 | 2,69 | 0,06094 | -0,52 | -1,43 | 0,04503 | NM_002968    | NAPEPLD  |
| 8141872 | 1,43 | 2,69 | 0,03384 | 2,68  | 6,42  | 0,00016 | NM_001122838 | RCN2     |
| 7985089 | 1,43 | 2,69 | 0,04456 | 2,35  | 5,11  | 0,00234 | NM_002902    | RNF141   |
| 7946569 | 1,43 | 2,69 | 0,04853 | 2,96  | 7,79  | 0,00000 | NM_016422    | HADH     |
| 8096753 | 1,43 | 2,69 | 0,13974 | 2,62  | 6,16  | 0,00049 | NM_005327    | NF1      |
| 8022424 | 1,43 | 2,69 | 0,09462 | 3,98  | 15,80 | 0,00040 | NM_001128147 | NF1      |
| 8067862 | 1,43 | 2,69 | 0,09462 | 3,98  | 15,80 | 0,00040 | NM_001128147 | MANEA    |
| 8121144 | 1,43 | 2,69 | 0,03601 | 2,76  | 6,79  | 0,01180 | NM_024641    | PARP16   |
| 7989759 | 1,43 | 2,69 | 0,01544 | 3,67  | 12,77 | 0,00008 | NM_017851    | ALDH9A1  |
| 7921970 | 1,43 | 2,69 | 0,07014 | 3,28  | 9,72  | 0,00005 | NM_000696    | DENND2D  |
| 7918487 | 1,42 | 2,68 | 0,00066 | 2,76  | 6,79  | 0,00143 | NM_024901    | AOC3     |
| 8007420 | 1,42 | 2,68 | 0,01522 | 1,26  | 2,39  | 0,00450 | NM_003734    | C20orf43 |
| 8063509 | 1,42 | 2,68 | 0,01036 | 1,27  | 2,42  | 0,00344 | NM_016407    | FTH1     |
| 7948656 | 1,42 | 2,68 | 0,01235 | 1,25  | 2,37  | 0,05001 | NM_002032    | CLK2     |
| 7920737 | 1,42 | 2,68 | 0,02554 | 3,25  | 9,52  | 0,00485 | NM_003993    | MEX3C    |
| 8023377 | 1,42 | 2,68 | 0,10502 | 2,22  | 4,67  | 0,01434 | NM_016626    | HACE1    |
| 8128522 | 1,42 | 2,68 | 0,07248 | 3,48  | 11,17 | 0,00005 | NM_020771    | LAMA1    |
| 8022176 | 1,42 | 2,68 | 0,00410 | 0,14  | 1,10  | 0,26572 | NM_005559    | BRP44L   |
| 8130732 | 1,42 | 2,68 | 0,12958 | 2,79  | 6,91  | 0,00007 | NM_016098    | C7orf26  |
| 8131427 | 1,42 | 2,68 | 0,03692 | 2,41  | 5,33  | 0,00024 | BC001076     | USP11    |
| 8167125 | 1,42 | 2,68 | 0,18347 | 3,27  | 9,67  | 0,00294 | NM_004651    | S100BPB  |
| 7899829 | 1,42 | 2,67 | 0,00986 | 2,47  | 5,56  | 0,00521 | NM_022753    | DNMBP    |
| 7935660 | 1,42 | 2,67 | 0,00109 | 1,53  | 2,88  | 0,00034 | NM_015221    | PRPF38B  |
| 7903519 | 1,42 | 2,67 | 0,02209 | 2,30  | 4,92  | 0,01032 | NM_018061    | MORC2    |
| 8075430 | 1,42 | 2,67 | 0,00665 | 2,39  | 5,24  | 0,00017 | NM_014941    | CBX3     |
| 8131949 | 1,42 | 2,67 | 0,03681 | 1,73  | 3,32  | 0,06712 | NM_016587    | ECH1     |
| 8036602 | 1,42 | 2,67 | 0,02025 | 3,80  | 13,93 | 0,01826 | NM_001398    | C15orf29 |
| 8130071 | 1,42 | 2,67 | 0,12294 | 2,61  | 6,09  | 0,08355 | NM_024713    | SEMA6D   |
| 7983527 | 1,42 | 2,67 | 0,01931 | -1,77 | -3,41 | 0,00900 | NM_153618    | PFN1     |
| 8011759 | 1,42 | 2,67 | 0,02675 | 1,31  | 2,48  | 0,00205 | NM_005022    | WDR89    |
| 7979565 | 1,42 | 2,67 | 0,02066 | 1,53  | 2,88  | 0,01816 | NM_080666    | MGC72080 |
| 7968787 | 1,42 | 2,67 | 0,38136 | 0,97  | 1,96  | 0,24454 | NR_002822    | R3HDM1   |
| 8045425 | 1,42 | 2,67 | 0,01306 | 2,35  | 5,11  | 0,00785 | NM_015361    | BEND6    |
| 8120362 | 1,42 | 2,67 | 0,04384 | 0,94  | 1,92  | 0,06442 | NM_152731    | ---      |
| 8166580 | 1,42 | 2,67 | 0,00420 | 2,43  | 5,39  | 0,00406 | ---          | STXBP4   |
| 8008566 | 1,41 | 2,67 | 0,01364 | 2,07  | 4,19  | 0,00267 | NM_178509    | ---      |
| 7905731 | 1,41 | 2,67 | 0,10205 | 2,50  | 5,64  | 0,01544 | ---          | AZIN1    |
| 8152222 | 1,41 | 2,67 | 0,03225 | 2,49  | 5,60  | 0,00016 | NM_015878    | TOR1B    |
| 8158560 | 1,41 | 2,67 | 0,05999 | 3,26  | 9,61  | 0,00009 | NM_014506    | CDC14B   |
| 8162610 | 1,41 | 2,66 | 0,01673 | 2,17  | 4,49  | 0,00022 | NM_033331    | CYP27A1  |
| 8048432 | 1,41 | 2,66 | 0,20903 | 2,27  | 4,83  | 0,00307 | NM_000784    | FAM149B1 |
| 7928354 | 1,41 | 2,66 | 0,11118 | 2,22  | 4,66  | 0,01265 | NM_173348    | STAU2    |
| 8151384 | 1,41 | 2,66 | 0,04854 | 1,80  | 3,49  | 0,00635 | NM_014393    | TMEM141  |
| 8159379 | 1,41 | 2,66 | 0,06872 | 1,40  | 2,64  | 0,09722 | NM_032928    | COX4I1   |
| 7997702 | 1,41 | 2,66 | 0,00088 | 1,02  | 2,02  | 0,01173 | NM_001861    | ARFIP1   |
| 8097813 | 1,41 | 2,66 | 0,04002 | 1,06  | 2,08  | 0,05811 | NM_001025595 | ZNF585A  |
| 8036373 | 1,41 | 2,66 | 0,00810 | 1,41  | 2,66  | 0,08186 | NM_152655    | SLC7A1   |
| 7970810 | 1,41 | 2,66 | 0,05003 | 4,03  | 16,37 | 0,00097 | NM_003045    | NUS1     |
| 8121704 | 1,41 | 2,66 | 0,04826 | 2,11  | 4,32  | 0,02893 | NM_138459    | TXLNA    |
| 7899703 | 1,41 | 2,66 | 0,00359 | 2,49  | 5,63  | 0,00007 | NM_175852    | PRKCD    |
| 8080487 | 1,41 | 2,66 | 0,04694 | 2,64  | 6,24  | 0,00572 | NM_006254    | ACP2     |
| 7947815 | 1,41 | 2,66 | 0,08184 | 2,83  | 7,12  | 0,01126 | NM_001610    | NPIP     |
| 7993404 | 1,41 | 2,66 | 0,07810 | 2,76  | 6,78  | 0,00008 | NM_006985    | MFHAS1   |
| 8149258 | 1,41 | 2,66 | 0,07963 | 3,69  | 12,95 | 0,00034 | NM_004225    | POU2F1   |

|         |      |      |         |       |       |         |              |            |
|---------|------|------|---------|-------|-------|---------|--------------|------------|
| 7907058 | 1,41 | 2,66 | 0,00184 | 2,27  | 4,83  | 0,00045 | NM_002697    | KRT8       |
| 7963567 | 1,41 | 2,66 | 0,26281 | 3,22  | 9,29  | 0,00029 | NM_002273    | TMEM199    |
| 8005857 | 1,41 | 2,66 | 0,11814 | 3,46  | 11,00 | 0,00067 | NM_152464    | CBWD3      |
| 8161587 | 1,41 | 2,66 | 0,00390 | 1,72  | 3,31  | 0,00174 | NM_201453    | MBOAT1     |
| 8124166 | 1,41 | 2,66 | 0,07504 | 4,66  | 25,28 | 0,00000 | NM_001080480 | DZIP1      |
| 7972336 | 1,41 | 2,66 | 0,04688 | -0,64 | -1,56 | 0,02079 | NM_198968    | WSB1       |
| 8005765 | 1,41 | 2,66 | 0,04466 | 3,22  | 9,29  | 0,00302 | NM_015626    | ALDH6A1    |
| 7980098 | 1,41 | 2,66 | 0,18853 | 2,83  | 7,12  | 0,00475 | NM_005589    | GFM2       |
| 8112622 | 1,41 | 2,65 | 0,09647 | 3,07  | 8,39  | 0,00049 | NM_032380    | FAT4       |
| 8097288 | 1,41 | 2,65 | 0,04400 | 1,87  | 3,66  | 0,02917 | NM_024582    | KLF12      |
| 7972003 | 1,41 | 2,65 | 0,01172 | 2,36  | 5,12  | 0,00356 | NM_007249    | NCK1       |
| 8082911 | 1,41 | 2,65 | 0,02984 | 2,82  | 7,05  | 0,00014 | NM_006153    | E2F6       |
| 8050336 | 1,41 | 2,65 | 0,01342 | 2,87  | 7,32  | 0,00004 | NR_003094    | ---        |
| 8144667 | 1,41 | 2,65 | 0,01719 | 0,33  | 1,26  | 0,29035 | ---          | SEC61B     |
| 8156838 | 1,41 | 2,65 | 0,00171 | 0,99  | 1,98  | 0,00462 | NM_006808    | SLC35C2    |
| 8066697 | 1,41 | 2,65 | 0,00897 | 2,61  | 6,09  | 0,00189 | NM_173179    | SF3A1      |
| 8075343 | 1,40 | 2,65 | 0,06352 | 2,10  | 4,30  | 0,00050 | NM_005877    | FLI35776   |
| 8019954 | 1,40 | 2,65 | 0,06704 | 2,01  | 4,03  | 0,00031 | NR_024101    | MAP3K5     |
| 8129804 | 1,40 | 2,65 | 0,06236 | 0,73  | 1,66  | 0,00753 | NM_005923    | USE1       |
| 8026679 | 1,40 | 2,65 | 0,04754 | 1,67  | 3,18  | 0,00050 | NM_018467    | VEGFA      |
| 8119898 | 1,40 | 2,65 | 0,07548 | 3,54  | 11,65 | 0,00324 | NM_001025366 | MRFAP1L1   |
| 8099235 | 1,40 | 2,65 | 0,03949 | 2,40  | 5,29  | 0,00260 | NM_203462    | FMO1       |
| 7907286 | 1,40 | 2,64 | 0,12514 | -0,65 | -1,56 | 0,01198 | NM_002021    | RFC3       |
| 7968563 | 1,40 | 2,64 | 0,15120 | 2,67  | 6,37  | 0,00367 | NM_002915    | PSMC5      |
| 8009227 | 1,40 | 2,64 | 0,00997 | 2,61  | 6,09  | 0,00012 | NM_002805    | LOC654433  |
| 8044605 | 1,40 | 2,64 | 0,06369 | -0,80 | -1,74 | 0,01794 | NR_015377    | TRIM4      |
| 8141363 | 1,40 | 2,64 | 0,10223 | 1,68  | 3,20  | 0,00062 | NM_033017    | C7orf68    |
| 8135915 | 1,40 | 2,64 | 0,06267 | 0,88  | 1,84  | 0,08818 | NM_013332    | PPDPF      |
| 8064100 | 1,40 | 2,64 | 0,04366 | -0,02 | -1,02 | 0,94388 | NM_024299    | TADA2A     |
| 8006715 | 1,40 | 2,64 | 0,02240 | 2,37  | 5,18  | 0,00060 | NM_001488    | DKC1       |
| 8170971 | 1,40 | 2,64 | 0,01906 | 3,22  | 9,33  | 0,00015 | NM_001363    | C13orf15   |
| 7968789 | 1,40 | 2,64 | 0,07424 | 0,38  | 1,30  | 0,32060 | NM_014059    | RUNX1      |
| 8070194 | 1,40 | 2,64 | 0,01317 | 1,65  | 3,14  | 0,00657 | NM_001001890 | EYA2       |
| 8063187 | 1,40 | 2,64 | 0,03851 | -1,55 | -2,92 | 0,00081 | NM_005244    | SNORA71D   |
| 8066262 | 1,40 | 2,64 | 0,20153 | -2,11 | -4,32 | 0,12672 | NR_003018    | SFRS2B     |
| 7943288 | 1,40 | 2,64 | 0,00881 | 1,66  | 3,15  | 0,01810 | NM_032102    | TGFB1      |
| 8037005 | 1,40 | 2,64 | 0,00765 | 1,76  | 3,40  | 0,00093 | NM_000660    | ELP3       |
| 8145586 | 1,40 | 2,64 | 0,00566 | 1,99  | 3,96  | 0,00278 | NM_018091    | SLC39A7    |
| 8118613 | 1,40 | 2,64 | 0,04108 | 1,36  | 2,57  | 0,01877 | NM_006979    | SLC39A7    |
| 8178225 | 1,40 | 2,64 | 0,04108 | 1,36  | 2,57  | 0,01877 | NM_006979    | SLC39A7    |
| 8179525 | 1,40 | 2,64 | 0,04108 | 1,36  | 2,57  | 0,01877 | NM_006979    | KLHDC5     |
| 7954604 | 1,40 | 2,64 | 0,03371 | 1,72  | 3,30  | 0,00043 | NM_020782    | TSR1       |
| 8011245 | 1,40 | 2,64 | 0,02278 | 3,57  | 11,91 | 0,00002 | NM_018128    | CDC23      |
| 8114396 | 1,40 | 2,63 | 0,10745 | 3,87  | 14,67 | 0,00004 | NM_004661    | UCHL5      |
| 7923007 | 1,40 | 2,63 | 0,00680 | 1,37  | 2,59  | 0,02069 | NM_015984    | CTTNBP2    |
| 8142497 | 1,40 | 2,63 | 0,04017 | -0,60 | -1,51 | 0,14541 | NM_033427    | PSMG1      |
| 8070330 | 1,40 | 2,63 | 0,09761 | 3,87  | 14,63 | 0,00001 | NM_003720    | HECTD2     |
| 7929145 | 1,40 | 2,63 | 0,01734 | 0,93  | 1,90  | 0,00261 | NM_182765    | NDUFA10    |
| 8060063 | 1,40 | 2,63 | 0,00940 | 1,58  | 3,00  | 0,00018 | NM_004544    | FAM65B     |
| 8124280 | 1,40 | 2,63 | 0,00829 | -1,02 | -2,03 | 0,00396 | NM_014722    | RPL29      |
| 8086148 | 1,40 | 2,63 | 0,02407 | 0,74  | 1,67  | 0,23839 | NM_000992    | TMEM97     |
| 8005839 | 1,39 | 2,63 | 0,00548 | 2,41  | 5,31  | 0,00337 | NM_014573    | SERTAD4    |
| 7909503 | 1,39 | 2,63 | 0,10638 | -0,29 | -1,22 | 0,31984 | NM_019605    | MASP1      |
| 8092661 | 1,39 | 2,63 | 0,08717 | -1,27 | -2,42 | 0,02456 | NM_001879    | ---        |
| 8171865 | 1,39 | 2,63 | 0,08195 | 2,58  | 5,99  | 0,02829 | ---          | DLAT       |
| 7943827 | 1,39 | 2,63 | 0,02322 | 2,91  | 7,50  | 0,00135 | NM_001931    | CY5D1      |
| 8004694 | 1,39 | 2,62 | 0,02651 | 2,85  | 7,19  | 0,00283 | NM_144607    | C18orf19   |
| 8022404 | 1,39 | 2,62 | 0,07150 | 3,12  | 8,68  | 0,00004 | NM_001098801 | THUMPD1    |
| 8000003 | 1,39 | 2,62 | 0,02524 | 1,64  | 3,12  | 0,01159 | NM_017736    | ST6GALNAC6 |
| 8164304 | 1,39 | 2,62 | 0,00024 | 0,89  | 1,85  | 0,00107 | NM_013443    | SRM        |
| 7912374 | 1,39 | 2,62 | 0,10965 | 2,55  | 5,84  | 0,01741 | NM_003132    | C8orf41    |
| 8150175 | 1,39 | 2,62 | 0,02709 | 1,90  | 3,72  | 0,00491 | NM_025115    | HOXA7      |
| 8138745 | 1,39 | 2,62 | 0,10419 | 0,09  | 1,06  | 0,77759 | NM_006896    | MGAT4B     |
| 8116316 | 1,39 | 2,62 | 0,00922 | 2,22  | 4,67  | 0,00165 | NM_014275    | NGF        |
| 7918869 | 1,39 | 2,62 | 0,03254 | 0,04  | 1,03  | 0,86240 | NM_002506    | PRDM2      |
| 7898070 | 1,39 | 2,62 | 0,06664 | 1,68  | 3,21  | 0,00261 | NM_012231    | SFXN3      |
| 7929919 | 1,39 | 2,62 | 0,12842 | 1,53  | 2,88  | 0,00558 | NM_030971    | SCG5       |
| 7982366 | 1,39 | 2,62 | 0,10868 | -0,77 | -1,70 | 0,11192 | NM_001144757 | FAM21C     |
| 7927233 | 1,39 | 2,62 | 0,05713 | 1,76  | 3,39  | 0,00026 | NM_015262    | MGEA5      |
| 7935910 | 1,39 | 2,62 | 0,13858 | 2,53  | 5,78  | 0,00032 | NM_012215    | PPP2R5E    |
| 7979551 | 1,39 | 2,61 | 0,04242 | 1,58  | 2,98  | 0,01764 | NM_006246    | MYO1E      |
| 7989277 | 1,39 | 2,61 | 0,00889 | 3,34  | 10,15 | 0,00116 | NM_004998    | SFRP1      |
| 8150428 | 1,39 | 2,61 | 0,08454 | -0,71 | -1,63 | 0,24873 | NM_003012    | ZNF136     |



|         |      |      |         |       |       |         |                 |           |
|---------|------|------|---------|-------|-------|---------|-----------------|-----------|
| 8025998 | 1,38 | 2,61 | 0,01815 | 1,23  | 2,35  | 0,01490 | NM_003437       | TNIK      |
| 8092095 | 1,38 | 2,61 | 0,01085 | 1,36  | 2,56  | 0,00236 | NM_015028       | EIF1AX    |
| 8171747 | 1,38 | 2,61 | 0,04015 | 2,05  | 4,14  | 0,03160 | NM_001412       | SHKBP1    |
| 8028851 | 1,38 | 2,61 | 0,00590 | 2,03  | 4,09  | 0,00739 | NM_138392       | UHRF2     |
| 8154316 | 1,38 | 2,61 | 0,08564 | 2,60  | 6,05  | 0,00078 | NM_152896       | ARL15     |
| 8112033 | 1,38 | 2,61 | 0,11031 | 2,01  | 4,03  | 0,01206 | NM_019087       | BDH2      |
| 8102065 | 1,38 | 2,61 | 0,02945 | 0,77  | 1,71  | 0,09399 | NM_020139       | STK19     |
| 8118395 | 1,38 | 2,61 | 0,01699 | 1,68  | 3,20  | 0,00059 | NR_026717       | STK19     |
| 8178164 | 1,38 | 2,61 | 0,01699 | 1,68  | 3,20  | 0,00059 | NR_026717       | TUBGCP5   |
| 7981798 | 1,38 | 2,61 | 0,02823 | 2,09  | 4,26  | 0,00433 | NM_052903       | SKA1      |
| 8021187 | 1,38 | 2,61 | 0,02592 | 0,68  | 1,60  | 0,05632 | NM_001039535    | GMDS      |
| 8123562 | 1,38 | 2,61 | 0,03693 | 3,37  | 10,37 | 0,00075 | NM_001500       | TOB2      |
| 8076331 | 1,38 | 2,61 | 0,00898 | 2,35  | 5,09  | 0,00827 | NM_016272       | MED29     |
| 8028645 | 1,38 | 2,60 | 0,02194 | 1,98  | 3,94  | 0,00044 | NM_017592       | EPB41L5   |
| 8044882 | 1,38 | 2,60 | 0,01758 | 1,99  | 3,97  | 0,00129 | NM_020909       | UBE3A     |
| 7986769 | 1,38 | 2,60 | 0,00089 | 2,24  | 4,73  | 0,00008 | NM_130839       | TRAPPC2L  |
| 7997852 | 1,38 | 2,60 | 0,00863 | 0,62  | 1,53  | 0,21231 | NM_016209       | RNF122    |
| 8150186 | 1,38 | 2,60 | 0,06238 | 2,14  | 4,41  | 0,00695 | NM_024787       | HMGNA     |
| 8117510 | 1,38 | 2,60 | 0,09100 | 2,55  | 5,86  | 0,00032 | NM_006353       | CNOT10    |
| 8078412 | 1,38 | 2,60 | 0,00113 | 2,47  | 5,56  | 0,00010 | NM_015442       | SMURF1    |
| 8141241 | 1,38 | 2,60 | 0,02950 | 2,74  | 6,68  | 0,01023 | NM_020429       | SYDE2     |
| 7917322 | 1,38 | 2,60 | 0,02576 | 1,59  | 3,01  | 0,00044 | NM_032184       | UBE3C     |
| 8137596 | 1,38 | 2,60 | 0,02880 | 2,94  | 7,65  | 0,00014 | NM_014671       | ZNF804A   |
| 8046815 | 1,38 | 2,59 | 0,07376 | -1,16 | -2,24 | 0,00975 | NM_194250       | LGTN      |
| 7923889 | 1,38 | 2,59 | 0,06469 | 2,54  | 5,83  | 0,00066 | NM_006893       | PIGW      |
| 8006634 | 1,37 | 2,59 | 0,05361 | 2,67  | 6,36  | 0,00116 | NM_178517       | HIST1H2BM |
| 8117594 | 1,37 | 2,59 | 0,05526 | 1,06  | 2,08  | 0,01835 | NM_003521       | SATB2     |
| 8058091 | 1,37 | 2,59 | 0,06140 | 3,03  | 8,18  | 0,00018 | NM_015265       | UQCRQ     |
| 8107998 | 1,37 | 2,59 | 0,05762 | 1,72  | 3,29  | 0,00091 | NM_014402       | PTCD2     |
| 8106107 | 1,37 | 2,59 | 0,01497 | 1,16  | 2,23  | 0,01176 | NM_024754       | FLOT2     |
| 8013788 | 1,37 | 2,59 | 0,02850 | 2,57  | 5,94  | 0,00066 | NM_004475       | ---       |
| 7965152 | 1,37 | 2,59 | 0,03073 | -0,03 | -1,02 | 0,92473 | ---             | FAM63A    |
| 7919872 | 1,37 | 2,59 | 0,06675 | 2,40  | 5,30  | 0,00024 | NM_018379       | SMARCAL1  |
| 8048175 | 1,37 | 2,59 | 0,02838 | 1,72  | 3,30  | 0,00354 | NM_014140       | DIP2B     |
| 7955376 | 1,37 | 2,59 | 0,01145 | 1,63  | 3,10  | 0,00493 | NM_173602       | PTMA      |
| 8107470 | 1,37 | 2,59 | 0,18918 | 1,60  | 3,03  | 0,00076 | NM_002823       | KIAA0406  |
| 8066200 | 1,37 | 2,59 | 0,03291 | 2,07  | 4,21  | 0,00116 | BC013755        | CDC34     |
| 8023968 | 1,37 | 2,59 | 0,04293 | 1,97  | 3,91  | 0,00521 | NM_004359       | MAPK7     |
| 8005576 | 1,37 | 2,59 | 0,01951 | 2,28  | 4,86  | 0,00391 | NM_139033       | NBPF12    |
| 7904500 | 1,37 | 2,58 | 0,58148 | -0,85 | -1,80 | 0,00729 | ENST00000436832 | IL1RAP    |
| 8084794 | 1,37 | 2,58 | 0,01631 | 1,81  | 3,50  | 0,00253 | NM_002182       | PDPN      |
| 7898057 | 1,37 | 2,58 | 0,00606 | -1,44 | -2,71 | 0,01181 | NM_006474       | LRRC37A4  |
| 8007919 | 1,37 | 2,58 | 0,00509 | 3,06  | 8,36  | 0,00082 | NR_002940       | ZNF547    |
| 8031732 | 1,37 | 2,58 | 0,10270 | 0,86  | 1,82  | 0,07825 | NM_173631       | SLC26A2   |
| 8109194 | 1,37 | 2,58 | 0,05095 | 1,56  | 2,95  | 0,00353 | NM_000112       | PLSCR4    |
| 8091306 | 1,37 | 2,58 | 0,06006 | 0,83  | 1,78  | 0,02355 | NR_033438       | MKNK1     |
| 7915846 | 1,37 | 2,58 | 0,07870 | 2,45  | 5,46  | 0,00130 | NM_003684       | GPX4      |
| 8024194 | 1,37 | 2,58 | 0,06691 | 2,11  | 4,33  | 0,00852 | NM_002085       | SDHAP1    |
| 8093039 | 1,37 | 2,58 | 0,00535 | 2,27  | 4,82  | 0,00446 | NR_003264       | USP9Y     |
| 8176578 | 1,37 | 2,58 | 0,10535 | 2,01  | 4,04  | 0,00102 | NM_004654       | ANXA10    |
| 8098246 | 1,37 | 2,58 | 0,08471 | 0,03  | 1,02  | 0,77644 | NM_007193       | RBP1      |
| 8091078 | 1,37 | 2,58 | 0,00457 | -1,09 | -2,12 | 0,02772 | NM_002899       | STMN1     |
| 7913869 | 1,37 | 2,58 | 0,02758 | 2,34  | 5,05  | 0,00323 | NM_203401       | MRPS22    |
| 8083011 | 1,37 | 2,58 | 0,04831 | 0,43  | 1,35  | 0,04832 | NM_020191       | HOMER1    |
| 8112841 | 1,37 | 2,58 | 0,01783 | 1,37  | 2,59  | 0,01167 | NM_004272       | TM9SF1    |
| 7978166 | 1,36 | 2,57 | 0,01409 | 2,21  | 4,62  | 0,00125 | NM_006405       | FRG1      |
| 8098714 | 1,36 | 2,57 | 0,05023 | 0,17  | 1,12  | 0,49461 | NM_004477       | XRCC1     |
| 8037331 | 1,36 | 2,57 | 0,00635 | 2,65  | 6,29  | 0,00033 | NM_006297       | ROR1      |
| 7901969 | 1,36 | 2,57 | 0,02835 | 1,27  | 2,41  | 0,00814 | NM_005012       | DIO2      |
| 7980485 | 1,36 | 2,57 | 0,10245 | -1,23 | -2,35 | 0,01536 | NM_013989       | RAB1F     |
| 7923483 | 1,36 | 2,57 | 0,04569 | 2,62  | 6,15  | 0,00469 | NM_002871       | ZNF597    |
| 7998978 | 1,36 | 2,57 | 0,15160 | -1,03 | -2,04 | 0,01730 | NM_152457       | STK19     |
| 8179391 | 1,36 | 2,57 | 0,01684 | 1,54  | 2,91  | 0,00444 | NR_026717       | MANBA     |
| 8102006 | 1,36 | 2,57 | 0,03430 | 0,93  | 1,90  | 0,00410 | NM_005908       | PCGF1     |
| 8053187 | 1,36 | 2,57 | 0,03569 | 2,63  | 6,20  | 0,00121 | NM_032673       | HNRNPH3   |
| 7927854 | 1,36 | 2,57 | 0,10819 | 2,65  | 6,29  | 0,00087 | NM_012207       | PPF1BP1   |
| 7954559 | 1,36 | 2,56 | 0,01606 | 1,56  | 2,94  | 0,00052 | NM_003622       | DNAJC12   |
| 7933933 | 1,36 | 2,56 | 0,10634 | 1,53  | 2,88  | 0,00888 | NM_021800       | JAK2      |
| 8154178 | 1,36 | 2,56 | 0,00044 | 1,17  | 2,26  | 0,02704 | NM_004972       | PCGF6     |
| 7936083 | 1,36 | 2,56 | 0,32341 | 1,77  | 3,40  | 0,03964 | NM_001011663    | PSG7      |
| 8037251 | 1,36 | 2,56 | 0,04771 | -1,16 | -2,24 | 0,11785 | NM_002783       | HDGFRP3   |
| 7991070 | 1,36 | 2,56 | 0,02063 | 2,32  | 5,00  | 0,01288 | NM_016073       | GGH       |
| 8151032 | 1,36 | 2,56 | 0,02951 | 2,84  | 7,16  | 0,00102 | NM_003878       | KANK1     |

|         |      |      |         |       |       |         |              |            |
|---------|------|------|---------|-------|-------|---------|--------------|------------|
| 8154012 | 1,36 | 2,56 | 0,00644 | 0,83  | 1,78  | 0,00124 | NM_153186    | FAM21C     |
| 7927513 | 1,36 | 2,56 | 0,07288 | 1,78  | 3,42  | 0,00057 | NM_015262    | ST7        |
| 8135638 | 1,36 | 2,56 | 0,04736 | 2,22  | 4,66  | 0,00210 | NM_018412    | RAD54L2    |
| 8080100 | 1,36 | 2,56 | 0,01483 | 2,50  | 5,64  | 0,00016 | NM_015106    | RABAC1     |
| 8037071 | 1,36 | 2,56 | 0,10929 | 0,91  | 1,88  | 0,01060 | NM_006423    | RNF216     |
| 8137986 | 1,36 | 2,56 | 0,05121 | 2,33  | 5,01  | 0,00022 | NM_207111    | SLC2A14    |
| 7960850 | 1,36 | 2,56 | 0,00389 | 0,98  | 1,97  | 0,02140 | NM_153449    | RPP14      |
| 8080773 | 1,36 | 2,56 | 0,13459 | 2,69  | 6,45  | 0,00258 | NM_001098783 | SMARCB1    |
| 8071768 | 1,35 | 2,56 | 0,03639 | 2,21  | 4,62  | 0,00007 | NM_003073    | ANO4       |
| 7957861 | 1,35 | 2,56 | 0,01986 | 0,06  | 1,04  | 0,74229 | NM_178826    | GMPR2      |
| 7973660 | 1,35 | 2,56 | 0,03349 | 1,60  | 3,04  | 0,00103 | NM_016576    | DTL        |
| 7909568 | 1,35 | 2,56 | 0,05283 | 3,24  | 9,46  | 0,00473 | NM_016448    | IMPA1      |
| 8151549 | 1,35 | 2,55 | 0,11636 | 3,94  | 15,37 | 0,00010 | NM_005536    | C14orf104  |
| 7978838 | 1,35 | 2,55 | 0,00953 | 1,54  | 2,90  | 0,08922 | NM_018139    | RSRC2      |
| 7967304 | 1,35 | 2,55 | 0,05026 | 1,92  | 3,77  | 0,00190 | NM_198261    | GZF1       |
| 8061373 | 1,35 | 2,55 | 0,00329 | 1,08  | 2,11  | 0,02141 | NM_022482    | PHF1       |
| 8118682 | 1,35 | 2,55 | 0,01881 | 1,79  | 3,45  | 0,00438 | NR_027692    | RNU1-1     |
| 7898375 | 1,35 | 2,55 | 0,01467 | -1,19 | -2,29 | 0,07854 | NR_004430    | RNU1-1     |
| 7898411 | 1,35 | 2,55 | 0,01467 | -1,19 | -2,29 | 0,07854 | NR_004430    | RNU1-1     |
| 7912800 | 1,35 | 2,55 | 0,01467 | -1,19 | -2,29 | 0,07854 | NR_004430    | RNU1-1     |
| 7912850 | 1,35 | 2,55 | 0,01467 | -1,19 | -2,29 | 0,07854 | NR_004430    | RNU1-1     |
| 7919576 | 1,35 | 2,55 | 0,01467 | -1,19 | -2,29 | 0,07854 | NR_004430    | EPHB2      |
| 7898809 | 1,35 | 2,55 | 0,02992 | 0,54  | 1,45  | 0,40621 | NM_017449    | USP37      |
| 8058940 | 1,35 | 2,55 | 0,08922 | 2,28  | 4,86  | 0,00107 | NM_020935    | PSIP1      |
| 8160238 | 1,35 | 2,55 | 0,03291 | 0,64  | 1,55  | 0,12414 | NM_033222    | AKAP12     |
| 8122807 | 1,35 | 2,55 | 0,02489 | 1,01  | 2,01  | 0,00137 | NM_005100    | ALPK1      |
| 8096919 | 1,35 | 2,55 | 0,02017 | 1,60  | 3,04  | 0,00181 | NM_025144    | NCL        |
| 8059689 | 1,35 | 2,55 | 0,00089 | 2,66  | 6,31  | 0,00020 | NM_005381    | PSMB1      |
| 8130952 | 1,35 | 2,55 | 0,00918 | 1,94  | 3,84  | 0,00044 | NM_002793    | ZFYVE9     |
| 7901426 | 1,35 | 2,55 | 0,04167 | 1,41  | 2,66  | 0,00492 | NM_004799    | NSMCE2     |
| 8148293 | 1,35 | 2,55 | 0,01275 | 1,29  | 2,44  | 0,01434 | NM_173685    | ZDHHC21    |
| 8160151 | 1,35 | 2,54 | 0,08134 | 2,48  | 5,56  | 0,00239 | NM_178566    | KLF11      |
| 8040211 | 1,35 | 2,54 | 0,00499 | 2,33  | 5,03  | 0,00312 | NM_003597    | PDXDC2     |
| 8002322 | 1,35 | 2,54 | 0,02049 | 2,25  | 4,75  | 0,00607 | NR_003610    | SNORD74    |
| 7922418 | 1,35 | 2,54 | 0,04696 | 2,59  | 6,02  | 0,02473 | NR_002579    | BBS1       |
| 7941639 | 1,35 | 2,54 | 0,10993 | 2,60  | 6,05  | 0,00761 | NM_024649    | BEND7      |
| 7932118 | 1,35 | 2,54 | 0,04111 | 1,97  | 3,91  | 0,00583 | NM_152751    | EXTL2      |
| 7918026 | 1,34 | 2,54 | 0,00622 | 0,74  | 1,67  | 0,00582 | NM_001439    | PRMT1      |
| 8030437 | 1,34 | 2,54 | 0,05845 | 2,25  | 4,74  | 0,00486 | NR_033397    | NOB1       |
| 8002312 | 1,34 | 2,54 | 0,24085 | 4,66  | 25,36 | 0,00002 | NM_014062    | AP4E1      |
| 7983679 | 1,34 | 2,54 | 0,04140 | 2,48  | 5,57  | 0,00079 | NM_007347    | MAP4       |
| 8086842 | 1,34 | 2,54 | 0,00122 | 0,55  | 1,47  | 0,12797 | NM_002375    | ATP1B1     |
| 7907160 | 1,34 | 2,54 | 0,10962 | 3,58  | 11,92 | 0,00801 | NM_001677    | ---        |
| 7910790 | 1,34 | 2,53 | 0,01615 | 1,43  | 2,70  | 0,00605 | ---          | MATN2      |
| 8147516 | 1,34 | 2,53 | 0,00106 | -0,64 | -1,55 | 0,20066 | NM_002380    | ST3GAL2    |
| 8002370 | 1,34 | 2,53 | 0,06627 | 1,98  | 3,95  | 0,04523 | NM_006927    | C7orf28A   |
| 8131356 | 1,34 | 2,53 | 0,07013 | 1,56  | 2,94  | 0,02226 | NM_015622    | LOC138412  |
| 8154727 | 1,34 | 2,53 | 0,10966 | 2,62  | 6,14  | 0,00775 | AF091236     | ST6GALNAC5 |
| 7902441 | 1,34 | 2,53 | 0,00289 | -0,14 | -1,10 | 0,36289 | NM_030965    | ARHGAP19   |
| 7935403 | 1,34 | 2,53 | 0,04047 | 2,53  | 5,76  | 0,00120 | NM_032900    | PLEKHM2    |
| 7898227 | 1,34 | 2,52 | 0,05890 | 3,29  | 9,75  | 0,00095 | NM_015164    | RPL13AP20  |
| 7954063 | 1,33 | 2,52 | 0,12710 | 3,01  | 8,06  | 0,00014 | NR_003932    | SPRY1      |
| 8097282 | 1,33 | 2,52 | 0,09582 | 0,79  | 1,73  | 0,00655 | NM_005841    | SNORD116-6 |
| 7981960 | 1,33 | 2,52 | 0,07722 | -1,15 | -2,22 | 0,10820 | NR_003321    | TMEM140    |
| 8136388 | 1,33 | 2,52 | 0,09786 | -1,31 | -2,47 | 0,00004 | NM_018295    | EYS        |
| 8127396 | 1,33 | 2,52 | 0,09966 | -1,06 | -2,08 | 0,35513 | NM_001142800 | DNAJA1     |
| 8154765 | 1,33 | 2,52 | 0,00545 | 0,86  | 1,81  | 0,05184 | NM_001539    | PRPSAP1    |
| 8018694 | 1,33 | 2,52 | 0,01702 | 2,16  | 4,48  | 0,00201 | NM_002766    | ZNF22      |
| 7927202 | 1,33 | 2,52 | 0,00690 | 2,08  | 4,24  | 0,00159 | NM_006963    | MINK1      |
| 8003991 | 1,33 | 2,52 | 0,00899 | 2,87  | 7,31  | 0,00098 | NM_153827    | C10orf12   |
| 7929609 | 1,33 | 2,52 | 0,00768 | 2,75  | 6,75  | 0,00078 | BC024315     | POTEE      |
| 8045208 | 1,33 | 2,52 | 0,07578 | -0,74 | -1,68 | 0,07304 | NM_001083538 | C1D        |
| 8052698 | 1,33 | 2,51 | 0,05062 | 2,15  | 4,45  | 0,00048 | NM_006333    | BCAP29     |
| 8135422 | 1,33 | 2,51 | 0,01376 | 1,25  | 2,38  | 0,00822 | NM_001008405 | PABPC4     |
| 7915207 | 1,33 | 2,51 | 0,00191 | 2,29  | 4,89  | 0,00066 | NM_001135653 | PNN        |
| 7974066 | 1,33 | 2,51 | 0,00854 | 0,70  | 1,62  | 0,04518 | NM_002687    | MMP14      |
| 7973336 | 1,33 | 2,51 | 0,00461 | 0,16  | 1,12  | 0,79675 | NM_004995    | LMAN2L     |
| 8053975 | 1,33 | 2,51 | 0,01760 | 1,47  | 2,77  | 0,04027 | NM_001142292 | ANKRD49    |
| 7943231 | 1,33 | 2,51 | 0,08959 | 2,30  | 4,92  | 0,00886 | NM_017704    | TMEM55A    |
| 8151756 | 1,33 | 2,51 | 0,04385 | 1,70  | 3,25  | 0,00042 | NM_018710    | SLC19A2    |
| 7922162 | 1,33 | 2,51 | 0,12356 | 3,21  | 9,23  | 0,00060 | NM_006996    | SIX1       |
| 7979505 | 1,33 | 2,51 | 0,04647 | 0,97  | 1,96  | 0,13138 | NM_005982    | AHNAK2     |
| 7981514 | 1,33 | 2,51 | 0,04436 | 2,07  | 4,21  | 0,04863 | NM_138420    | BDP1       |

|                                                     |      |      |         |       |       |         |                                     |            |
|-----------------------------------------------------|------|------|---------|-------|-------|---------|-------------------------------------|------------|
| 8177560                                             | 1,33 | 2,51 | 0,01751 | 1,63  | 3,10  | 0,00256 | NM_018429                           | ALDOC      |
| 8013660                                             | 1,32 | 2,51 | 0,06589 | 0,30  | 1,23  | 0,17623 | NM_005165                           | ZNF266     |
| 8033754                                             | 1,32 | 2,50 | 0,03703 | 3,09  | 8,53  | 0,00411 | NM_006631                           | PTPN4      |
| 8044849                                             | 1,32 | 2,50 | 0,01732 | 1,85  | 3,60  | 0,01823 | NM_002830                           | ANKFY1     |
| 8011599                                             | 1,32 | 2,50 | 0,01711 | 3,10  | 8,60  | 0,00019 | NM_016376                           | KYNU       |
| 8045539                                             | 1,32 | 2,50 | 0,00864 | 4,01  | 16,14 | 0,00049 | NM_003937                           | PCMTD1     |
| 8146427                                             | 1,32 | 2,50 | 0,01781 | -0,05 | -1,03 | 0,87844 | NM_052937                           | SSU72      |
| 7911568                                             | 1,32 | 2,50 | 0,01959 | 1,72  | 3,30  | 0,01180 | NM_014188                           | CACNB2     |
| 7926506                                             | 1,32 | 2,50 | 0,01022 | -0,62 | -1,53 | 0,14714 | NM_201596                           | MICA       |
| 8179238                                             | 1,32 | 2,50 | 0,10232 | 2,31  | 4,96  | 0,00130 | NM_000247                           | PSPC1      |
| 7970413                                             | 1,32 | 2,50 | 0,01905 | 1,81  | 3,50  | 0,00736 | NR_003272                           | MTMR4      |
| 8017019                                             | 1,32 | 2,50 | 0,19083 | 4,99  | 31,82 | 0,00037 | NM_004687                           | ALPK2      |
| 8023528                                             | 1,32 | 2,50 | 0,01774 | -0,24 | -1,18 | 0,31094 | NM_052947                           | KIAA0586   |
| 7974653                                             | 1,32 | 2,50 | 0,02348 | 2,19  | 4,58  | 0,00363 | NM_014749                           | POLR2J2    |
| 8141829                                             | 1,32 | 2,50 | 0,01788 | 1,64  | 3,11  | 0,00047 | NM_032959                           | CCNL1      |
| 8091658                                             | 1,32 | 2,50 | 0,11263 | 2,49  | 5,61  | 0,00208 | NM_020307                           | PGM5P2     |
| 8161513                                             | 1,32 | 2,49 | 0,05932 | 0,62  | 1,54  | 0,28779 | NR_002836                           | BEX4       |
| 8169009                                             | 1,32 | 2,49 | 0,13216 | 0,25  | 1,19  | 0,00395 | NM_001080425                        | VPS33A     |
| 7967240                                             | 1,32 | 2,49 | 0,05063 | 2,01  | 4,03  | 0,00085 | NM_022916                           | PPIF       |
| 7928589                                             | 1,32 | 2,49 | 0,09356 | 3,60  | 12,13 | 0,00032 | NM_005729                           | PRSS23     |
| 7942957                                             | 1,32 | 2,49 | 0,01078 | 1,51  | 2,85  | 0,00093 | NM_007173                           | TRAK1      |
| 8079037                                             | 1,32 | 2,49 | 0,04188 | 2,24  | 4,72  | 0,00023 | NM_001042646                        | SPATA7     |
| 7976084                                             | 1,32 | 2,49 | 0,03550 | 0,21  | 1,16  | 0,34119 | NM_018418                           | FANCI      |
| 7985829                                             | 1,32 | 2,49 | 0,02189 | 3,86  | 14,57 | 0,00292 | NM_001113378                        | EXOSC8     |
| 7968658                                             | 1,32 | 2,49 | 0,00292 | 2,24  | 4,72  | 0,00307 | NM_181503                           | INMT       |
| 8132092                                             | 1,32 | 2,49 | 0,03086 | -1,71 | -3,27 | 0,00467 | NM_006774                           | ANKRD29    |
| 8022559                                             | 1,32 | 2,49 | 0,01942 | 3,72  | 13,18 | 0,00029 | NM_173505                           | PRKD3      |
| 8051547                                             | 1,32 | 2,49 | 0,02896 | 0,97  | 1,95  | 0,04057 | NM_005813                           | KIAA1731   |
| 7943126                                             | 1,32 | 2,49 | 0,00396 | 1,07  | 2,10  | 0,01858 | NM_033395                           | TUBA1B     |
| 7963046                                             | 1,32 | 2,49 | 0,00369 | 1,03  | 2,04  | 0,04495 | NM_006082                           | STAMBPL1   |
| 7929012                                             | 1,31 | 2,49 | 0,14170 | 2,20  | 4,61  | 0,00419 | NM_020799                           | ING3       |
| 8135718                                             | 1,31 | 2,49 | 0,11338 | 1,80  | 3,49  | 0,00612 | NM_019071                           | FEZ2       |
| 8051427                                             | 1,31 | 2,49 | 0,00899 | 1,15  | 2,22  | 0,00355 | NM_005102                           | ARID1A     |
| 7899220                                             | 1,31 | 2,49 | 0,00326 | 2,42  | 5,37  | 0,00101 | NM_006015                           | SETD8      |
| 7959574                                             | 1,31 | 2,49 | 0,05178 | 2,75  | 6,74  | 0,00021 | NM_020382                           | YTHDC2     |
| 8107375                                             | 1,31 | 2,49 | 0,00977 | 2,08  | 4,24  | 0,00141 | NM_022828                           | SNORD15A   |
| 7942592                                             | 1,31 | 2,48 | 0,10400 | 0,06  | 1,05  | 0,91984 | NR_000005                           | STMN3      |
| 8067722                                             | 1,31 | 2,48 | 0,04126 | 0,11  | 1,08  | 0,78707 | NM_015894                           | BRD2       |
| 8179504                                             | 1,31 | 2,48 | 0,09788 | 2,70  | 6,50  | 0,00492 | NM_005104                           | TRIM5      |
| 7946089                                             | 1,31 | 2,48 | 0,08391 | 2,10  | 4,28  | 0,00025 | NM_033092                           | C20orf4    |
| 8062286                                             | 1,31 | 2,48 | 0,01445 | 1,75  | 3,37  | 0,00067 | BC019311                            | RABGGTB    |
| 7902382                                             | 1,31 | 2,48 | 0,08586 | 4,07  | 16,77 | 0,00002 | NM_004582                           | ZFAND2B    |
| 8048478                                             | 1,31 | 2,48 | 0,02430 | 1,05  | 2,08  | 0,09111 | NM_138802                           | LRRC41     |
| 7915827                                             | 1,31 | 2,48 | 0,06578 | 2,33  | 5,01  | 0,00777 | NM_006369                           | IGF1R      |
| 7986359                                             | 1,31 | 2,48 | 0,09215 | 2,97  | 7,83  | 0,01519 | NM_000875                           | APEX1      |
| 7973056                                             | 1,31 | 2,48 | 0,17224 | 3,31  | 9,89  | 0,00035 | NM_001641                           | COQ6       |
| 7975661                                             | 1,31 | 2,48 | 0,02340 | 2,76  | 6,78  | 0,00178 | NM_182476                           | PRIM2      |
| 8120411                                             | 1,31 | 2,48 | 0,04227 | 1,24  | 2,37  | 0,04815 | NM_000947                           | MGC72080   |
| 8082244                                             | 1,31 | 2,48 | 0,34025 | 0,37  | 1,30  | 0,52602 | NR_002822                           | ---        |
| 7984567                                             | 1,31 | 2,48 | 0,01451 | 0,31  | 1,24  | 0,12327 | ---                                 | ZNF268     |
| 7960165                                             | 1,31 | 2,48 | 0,07246 | 2,18  | 4,52  | 0,00532 | NM_003415                           | UBE2T      |
| 7923426                                             | 1,31 | 2,48 | 0,01642 | 2,71  | 6,54  | 0,00041 | NM_014176                           | RUVBL1     |
| 8090448                                             | 1,31 | 2,48 | 0,13694 | 3,54  | 11,61 | 0,00001 | NM_003707                           | GLMN       |
| 7917676                                             | 1,31 | 2,48 | 0,05560 | 1,97  | 3,92  | 0,00868 | NM_053274                           | DECR1      |
| 8147228                                             | 1,31 | 2,48 | 0,16382 | 1,40  | 2,64  | 0,03187 | NM_001359                           | GPSM2      |
| 7903565                                             | 1,31 | 2,48 | 0,09810 | 3,64  | 12,51 | 0,00469 | NM_013296                           | TMEM194B   |
| 8057732                                             | 1,31 | 2,47 | 0,03949 | 2,40  | 5,27  | 0,00010 | NM_001142645                        | FAM168B    |
| 8055249                                             | 1,30 | 2,47 | 0,13325 | 1,07  | 2,11  | 0,01522 | NM_001009993                        | TXNL4B     |
| 8002660                                             | 1,30 | 2,47 | 0,00851 | 2,69  | 6,47  | 0,00043 | NM_017853                           | GPD2       |
| 8045816                                             | 1,30 | 2,47 | 0,02854 | 2,92  | 7,54  | 0,00013 | NM_001083112                        | BHLHE40    |
| 8077441                                             | 1,30 | 2,47 | 0,02365 | 1,75  | 3,35  | 0,00154 | NM_003670                           | TMEM8A     |
| 7998233                                             | 1,30 | 2,47 | 0,02493 | 2,22  | 4,66  | 0,00539 | NM_021259                           | SIN3A      |
| 7990487                                             | 1,30 | 2,46 | 0,03275 | 2,62  | 6,14  | 0,00625 | NM_015477                           | FAM86B1 // |
| FAM86B1 // FAM86B1 // FAM86B1 // FAM86B1 // FAM86B1 |      |      |         |       |       |         |                                     |            |
| 7945875                                             | 1,30 | 2,46 | 0,02755 | 1,99  | 3,96  | 0,01035 | NR_003494 // NR_003494 // NR_003494 |            |
| // NR_003494 // NR_003494 // NR_003494              |      |      |         | SMC6  |       |         |                                     |            |
| 8050443                                             | 1,30 | 2,46 | 0,02439 | 2,25  | 4,75  | 0,00041 | NM_001142286                        | DEPDC5     |
| 8072529                                             | 1,30 | 2,46 | 0,02201 | 2,13  | 4,39  | 0,00100 | NM_014662                           | MCOLN3     |
| 7917304                                             | 1,30 | 2,46 | 0,01723 | 3,07  | 8,43  | 0,00623 | NM_018298                           | CRNKL1     |
| 8065256                                             | 1,30 | 2,46 | 0,12152 | 1,11  | 2,16  | 0,00323 | NM_016652                           | SUN1       |
| 8131013                                             | 1,30 | 2,46 | 0,03387 | 2,61  | 6,11  | 0,00001 | NM_001130965                        | HTATIP2    |
| 7938880                                             | 1,30 | 2,46 | 0,04124 | 4,14  | 17,60 | 0,00016 | NM_001098520                        | THOC1      |
| 8021924                                             | 1,30 | 2,46 | 0,15837 | 2,73  | 6,63  | 0,00346 | NM_005131                           | FH         |

|         |      |      |         |       |       |         |                 |           |
|---------|------|------|---------|-------|-------|---------|-----------------|-----------|
| 7925480 | 1,30 | 2,46 | 0,06684 | 1,06  | 2,09  | 0,00379 | NM_000143       | RNASEH2B  |
| 7969179 | 1,30 | 2,46 | 0,12434 | 2,11  | 4,33  | 0,00675 | NM_024570       | URM1      |
| 8158242 | 1,30 | 2,46 | 0,09305 | 2,70  | 6,51  | 0,00037 | NM_030914       | ARPC4     |
| 8077652 | 1,30 | 2,46 | 0,03358 | 0,96  | 1,94  | 0,00724 | NM_005718       | ATP6VOC   |
| 7992646 | 1,30 | 2,46 | 0,01771 | 2,12  | 4,34  | 0,00901 | NM_001694       | VAC14     |
| 8002421 | 1,30 | 2,46 | 0,22320 | 2,20  | 4,58  | 0,01474 | NM_018052       | MTMR10    |
| 7987048 | 1,30 | 2,46 | 0,02154 | 1,21  | 2,31  | 0,06194 | NM_017762       | PCDH10    |
| 8097449 | 1,30 | 2,46 | 0,03282 | -0,89 | -1,85 | 0,00370 | NM_032961       | FAM178A   |
| 7929858 | 1,30 | 2,46 | 0,05650 | 1,20  | 2,30  | 0,00502 | NM_018121       | PRPS2     |
| 8166049 | 1,30 | 2,46 | 0,00262 | 3,28  | 9,70  | 0,00214 | NM_001039091    | BCL10     |
| 7917338 | 1,30 | 2,45 | 0,06227 | 0,75  | 1,69  | 0,16041 | NM_003921       | ADAL      |
| 7983191 | 1,30 | 2,45 | 0,01162 | 2,99  | 7,93  | 0,00162 | NM_001159280    | WBP4      |
| 7968746 | 1,30 | 2,45 | 0,00761 | 0,52  | 1,43  | 0,27708 | NM_007187       | GNAI1     |
| 8133860 | 1,29 | 2,45 | 0,02191 | 1,38  | 2,60  | 0,01390 | NM_002069       | OGT       |
| 8168316 | 1,29 | 2,45 | 0,04947 | 2,11  | 4,31  | 0,00119 | NM_181672       | ECHS1     |
| 7937217 | 1,29 | 2,45 | 0,00356 | 1,48  | 2,78  | 0,00227 | NM_004092       | DDX23     |
| 7962869 | 1,29 | 2,45 | 0,18772 | 3,59  | 12,08 | 0,00016 | NM_004818       | LARGE     |
| 8075637 | 1,29 | 2,45 | 0,14959 | -1,43 | -2,69 | 0,00615 | NM_004737       | SDCCAG8   |
| 7911017 | 1,29 | 2,45 | 0,03600 | 1,03  | 2,04  | 0,02199 | NM_006642       | BAP1      |
| 8087885 | 1,29 | 2,45 | 0,00570 | 3,15  | 8,85  | 0,00060 | NM_004656       | SFXN4     |
| 7936641 | 1,29 | 2,45 | 0,00179 | 1,22  | 2,33  | 0,00488 | NM_213649       | ATPAF2    |
| 8013179 | 1,29 | 2,45 | 0,00835 | 2,37  | 5,16  | 0,00062 | NM_145691       | SMARCAD1  |
| 8096463 | 1,29 | 2,45 | 0,13316 | 2,87  | 7,33  | 0,00053 | NM_001128429    | PIBF1     |
| 7969390 | 1,29 | 2,45 | 0,11157 | 0,35  | 1,28  | 0,08880 | NM_006346       | MOV10     |
| 7904050 | 1,29 | 2,45 | 0,15962 | 2,29  | 4,89  | 0,00289 | NM_020963       | TRAF6     |
| 7947540 | 1,29 | 2,45 | 0,02873 | 2,11  | 4,32  | 0,00992 | NM_145803       | VPRBP     |
| 8087748 | 1,29 | 2,45 | 0,02602 | 2,98  | 7,91  | 0,00004 | NM_014703       | AP2A1     |
| 8030470 | 1,29 | 2,45 | 0,03626 | 2,16  | 4,48  | 0,00432 | NM_014203       | NIN       |
| 7979044 | 1,29 | 2,44 | 0,02439 | 2,17  | 4,50  | 0,00241 | NM_020921       | GPAM      |
| 8113356 | 1,29 | 2,44 | 0,35430 | -1,22 | -2,32 | 0,05706 | AK172782 ZNF558 |           |
| 8033667 | 1,29 | 2,44 | 0,00251 | 2,73  | 6,62  | 0,00203 | NM_144693       | MRRF      |
| 8157638 | 1,29 | 2,44 | 0,10637 | 2,71  | 6,56  | 0,00015 | NM_138777       | CBWD3     |
| 8155636 | 1,29 | 2,44 | 0,00283 | 1,61  | 3,05  | 0,00267 | NM_201453       | UNC50     |
| 8043820 | 1,29 | 2,44 | 0,00095 | 1,85  | 3,60  | 0,00368 | NM_014044       | ---       |
| 8150844 | 1,29 | 2,44 | 0,00415 | 0,50  | 1,41  | 0,00301 | --- FRK         |           |
| 8129071 | 1,29 | 2,44 | 0,04303 | 1,03  | 2,05  | 0,00400 | NM_002031       | PDP2      |
| 7996341 | 1,28 | 2,44 | 0,06333 | 2,32  | 4,99  | 0,00009 | NM_020786       | ---       |
| 8165656 | 1,28 | 2,44 | 0,05440 | -1,62 | -3,08 | 0,00747 | --- ELP4        |           |
| 7939102 | 1,28 | 2,43 | 0,08423 | 1,90  | 3,73  | 0,00585 | NM_019040       | RHOF      |
| 7967202 | 1,28 | 2,43 | 0,01140 | 3,59  | 12,03 | 0,00034 | NM_019034       | FAM188A   |
| 7932285 | 1,28 | 2,43 | 0,15262 | 1,78  | 3,43  | 0,01852 | NM_024948       | TSPYL5    |
| 8151931 | 1,28 | 2,43 | 0,12682 | -2,60 | -6,07 | 0,01131 | NM_033512       | MAGED2    |
| 8167815 | 1,28 | 2,43 | 0,04795 | 1,58  | 2,98  | 0,04408 | NM_014599       | SPTLC1    |
| 8162294 | 1,28 | 2,43 | 0,04698 | 2,69  | 6,45  | 0,00073 | NM_006415       | C6orf186  |
| 8128837 | 1,28 | 2,43 | 0,03853 | -0,28 | -1,22 | 0,38688 | NM_001123364    | MT1P2     |
| 7925413 | 1,28 | 2,43 | 0,04351 | 0,27  | 1,20  | 0,75129 | AF333388 ---    |           |
| 7965508 | 1,28 | 2,43 | 0,00968 | 0,15  | 1,11  | 0,78454 | --- RPL10       |           |
| 8034416 | 1,28 | 2,43 | 0,22248 | 2,45  | 5,48  | 0,00369 | NM_006013       | MTX3      |
| 8112857 | 1,28 | 2,43 | 0,04032 | 0,83  | 1,78  | 0,24751 | NM_001010891    | UPF2      |
| 7932041 | 1,28 | 2,43 | 0,00424 | 2,05  | 4,14  | 0,01058 | NM_080599       | UHRF1BP1L |
| 7965723 | 1,28 | 2,42 | 0,15359 | 0,96  | 1,95  | 0,02986 | NM_015054       | ---       |
| 7928489 | 1,28 | 2,42 | 0,29564 | -0,23 | -1,17 | 0,72857 | --- SEH1L       |           |
| 8020254 | 1,28 | 2,42 | 0,10863 | 3,49  | 11,24 | 0,00027 | NM_031216       | NENF      |
| 7909603 | 1,28 | 2,42 | 0,06860 | 1,05  | 2,07  | 0,00316 | NM_013349       | SELS      |
| 7991587 | 1,27 | 2,42 | 0,08498 | 2,12  | 4,34  | 0,00032 | NM_203472       | TMEM203   |
| 8165642 | 1,27 | 2,42 | 0,02377 | 3,40  | 10,55 | 0,00011 | NM_053045       | RPL38     |
| 8009561 | 1,27 | 2,42 | 0,00355 | 2,00  | 4,01  | 0,00160 | NM_000999       | CCNJ      |
| 7929550 | 1,27 | 2,42 | 0,10077 | 0,84  | 1,79  | 0,04814 | NM_001134375    | NCS1      |
| 8158627 | 1,27 | 2,42 | 0,02883 | 2,59  | 6,02  | 0,00007 | NM_014286       | SLC38A4   |
| 7962559 | 1,27 | 2,42 | 0,04637 | -1,24 | -2,36 | 0,03153 | NM_018018       | COX7C     |
| 8106776 | 1,27 | 2,42 | 0,00332 | 1,10  | 2,15  | 0,02102 | NM_001867       | CSPP1     |
| 8146756 | 1,27 | 2,41 | 0,03769 | 1,82  | 3,52  | 0,02341 | NM_001077204    | PDCD4     |
| 7930454 | 1,27 | 2,41 | 0,03922 | 1,91  | 3,77  | 0,00495 | NM_145341       | ANKRD40   |
| 8016725 | 1,27 | 2,41 | 0,03140 | 3,25  | 9,50  | 0,00310 | NM_052855       | BAK1      |
| 8125766 | 1,27 | 2,41 | 0,25851 | 2,19  | 4,56  | 0,02825 | NM_001188       | RCAN2     |
| 8126760 | 1,27 | 2,41 | 0,13993 | -0,81 | -1,75 | 0,01886 | NM_005822       | DSN1      |
| 8066074 | 1,27 | 2,41 | 0,09515 | 2,99  | 7,92  | 0,00387 | NM_001145316    | ACBD5     |
| 7932703 | 1,27 | 2,41 | 0,00657 | 2,79  | 6,92  | 0,00011 | NM_145698       | ARHGDI8   |
| 7961532 | 1,27 | 2,41 | 0,17220 | -0,52 | -1,43 | 0,36918 | NM_001175       | ---       |
| 8165661 | 1,27 | 2,41 | 0,14936 | -0,80 | -1,74 | 0,00873 | --- IL1B        |           |
| 8054722 | 1,27 | 2,41 | 0,03905 | -0,51 | -1,42 | 0,08431 | NM_000576       | NEFL      |
| 8149835 | 1,27 | 2,41 | 0,05673 | -0,57 | -1,49 | 0,02143 | NM_006158       | SH3BGRL2  |
| 8120833 | 1,27 | 2,41 | 0,01514 | 1,76  | 3,39  | 0,00884 | NM_031469       | FAM20B    |

|         |      |      |         |       |       |         |              |          |
|---------|------|------|---------|-------|-------|---------|--------------|----------|
| 7907680 | 1,27 | 2,41 | 0,05681 | 1,97  | 3,92  | 0,00044 | NM_014864    | ETNK1    |
| 7954419 | 1,27 | 2,40 | 0,00479 | 2,53  | 5,79  | 0,00017 | NM_018638    | KIAA0101 |
| 7989647 | 1,27 | 2,40 | 0,09813 | 2,95  | 7,73  | 0,00781 | NM_014736    | ALMS1    |
| 8042737 | 1,27 | 2,40 | 0,01118 | 2,20  | 4,60  | 0,00828 | NM_015120    | LRPAP1   |
| 8099073 | 1,26 | 2,40 | 0,11395 | 1,25  | 2,38  | 0,08337 | NM_002337    | FASTKD3  |
| 8110920 | 1,26 | 2,40 | 0,10220 | 2,77  | 6,80  | 0,00302 | NM_024091    | C1orf57  |
| 7910591 | 1,26 | 2,40 | 0,13627 | 2,47  | 5,54  | 0,00224 | NM_032324    | NFE2L1   |
| 8008087 | 1,26 | 2,40 | 0,05992 | 2,95  | 7,75  | 0,00304 | NM_003204    | RANBP1   |
| 8071332 | 1,26 | 2,40 | 0,06188 | 2,41  | 5,32  | 0,02350 | NM_002882    | BPGM     |
| 8136341 | 1,26 | 2,40 | 0,03776 | 1,16  | 2,24  | 0,00011 | NM_199186    | RLIM     |
| 8173615 | 1,26 | 2,40 | 0,03581 | 2,15  | 4,43  | 0,00036 | NM_183353    | SERTAD3  |
| 8036908 | 1,26 | 2,40 | 0,03823 | 2,28  | 4,84  | 0,00039 | NM_013368    | FASTKD2  |
| 8047815 | 1,26 | 2,40 | 0,08268 | 2,20  | 4,60  | 0,00237 | NM_001136194 | UQCR11   |
| 8032284 | 1,26 | 2,40 | 0,03502 | 2,49  | 5,63  | 0,00183 | NM_006830    | PITPNC1  |
| 8009353 | 1,26 | 2,40 | 0,08778 | 4,42  | 21,42 | 0,00038 | NM_181671    | RAC1     |
| 8131406 | 1,26 | 2,40 | 0,03896 | 2,21  | 4,63  | 0,01713 | NM_018890    | ZNF714   |
| 8027285 | 1,26 | 2,40 | 0,02882 | 3,09  | 8,54  | 0,02331 | NM_182515    | LAMA3    |
| 8020551 | 1,26 | 2,40 | 0,00521 | 4,05  | 16,52 | 0,00001 | NM_198129    | PRPF40A  |
| 8055913 | 1,26 | 2,40 | 0,10522 | 2,27  | 4,83  | 0,00104 | NM_017892    | NBEA     |
| 7968577 | 1,26 | 2,40 | 0,01137 | 1,90  | 3,73  | 0,00141 | NM_015678    | NGRN     |
| 7985983 | 1,26 | 2,40 | 0,05551 | 1,97  | 3,91  | 0,01250 | NR_028052    | USP13    |
| 8084100 | 1,26 | 2,40 | 0,03597 | 2,74  | 6,67  | 0,00001 | NM_003940    | PARP9    |
| 8090018 | 1,26 | 2,40 | 0,02974 | 0,13  | 1,09  | 0,49784 | NM_031458    | NR2C1    |
| 7965523 | 1,26 | 2,40 | 0,03009 | 2,18  | 4,52  | 0,00346 | NM_003297    | RUFY1    |
| 8110499 | 1,26 | 2,40 | 0,00016 | 2,87  | 7,33  | 0,00000 | NM_025158    | TMEM136  |
| 7944554 | 1,26 | 2,39 | 0,01673 | 2,00  | 3,99  | 0,00243 | NM_174926    | SUMF2    |
| 8132964 | 1,26 | 2,39 | 0,11829 | 2,96  | 7,76  | 0,00040 | NM_015411    | PPIAL4A  |
| 7919436 | 1,26 | 2,39 | 0,44381 | 0,52  | 1,44  | 0,05472 | NM_178230    | COP57B   |
| 8049088 | 1,26 | 2,39 | 0,12957 | 2,90  | 7,48  | 0,00005 | NM_022730    | RRP1B    |
| 8068902 | 1,26 | 2,39 | 0,00016 | 3,06  | 8,32  | 0,00043 | NM_015056    | SLC43A1  |
| 7948249 | 1,26 | 2,39 | 0,00923 | 2,41  | 5,31  | 0,00012 | NM_003627    | DUSP16   |
| 7961371 | 1,26 | 2,39 | 0,02917 | 2,08  | 4,23  | 0,00032 | NM_030640    | TMEM41A  |
| 8092534 | 1,26 | 2,39 | 0,21465 | 4,11  | 17,24 | 0,00007 | NM_080652    | MIR622   |
| 7969574 | 1,26 | 2,39 | 0,18285 | 4,25  | 19,04 | 0,00181 | NR_030754    | MRPS31   |
| 7971184 | 1,26 | 2,39 | 0,04946 | 1,67  | 3,18  | 0,00866 | NM_005830    | JAG1     |
| 8064978 | 1,26 | 2,39 | 0,05372 | 1,06  | 2,08  | 0,06422 | NM_000214    | HRH1     |
| 8077851 | 1,26 | 2,39 | 0,12896 | 0,10  | 1,07  | 0,68769 | NM_001098213 | MGC72080 |
| 7945873 | 1,26 | 2,39 | 0,46051 | 0,61  | 1,53  | 0,47315 | NR_002822    | LMOD1    |
| 7923386 | 1,26 | 2,39 | 0,11253 | -1,30 | -2,46 | 0,00628 | NM_012134    | GADD45A  |
| 7902227 | 1,26 | 2,39 | 0,01271 | 1,82  | 3,53  | 0,00122 | NM_001924    | TGFB3    |
| 7980316 | 1,25 | 2,38 | 0,03232 | -0,34 | -1,27 | 0,13200 | NM_003239    | BRD8     |
| 8114365 | 1,25 | 2,38 | 0,02275 | 2,17  | 4,50  | 0,00337 | NM_139199    | SRBD1    |
| 8051963 | 1,25 | 2,38 | 0,17580 | 2,80  | 6,98  | 0,01058 | NM_018079    | ZCCHC8   |
| 7967287 | 1,25 | 2,38 | 0,15184 | 3,50  | 11,29 | 0,00018 | NM_017612    | MT1H     |
| 7995829 | 1,25 | 2,38 | 0,07289 | 0,09  | 1,07  | 0,82512 | NM_005951    | MRPL1    |
| 8095894 | 1,25 | 2,38 | 0,00898 | 0,94  | 1,92  | 0,06270 | NM_020236    | DCAF5    |
| 7979849 | 1,25 | 2,38 | 0,08096 | 2,13  | 4,38  | 0,00131 | NM_003861    | SERPINB9 |
| 8123609 | 1,25 | 2,38 | 0,00771 | 2,07  | 4,21  | 0,00203 | NM_004155    | PLK1S1   |
| 8061305 | 1,25 | 2,38 | 0,00391 | 0,42  | 1,34  | 0,09835 | NM_018474    | MCOLN1   |
| 8025183 | 1,25 | 2,38 | 0,02550 | 1,62  | 3,08  | 0,01369 | NM_020533    | C11orf48 |
| 7948775 | 1,25 | 2,38 | 0,15540 | 1,79  | 3,47  | 0,00493 | NM_024099    | KIAA0020 |
| 8159854 | 1,25 | 2,38 | 0,08301 | 1,85  | 3,61  | 0,00344 | NM_014878    | KHDRBS1  |
| 7899654 | 1,25 | 2,38 | 0,02223 | 1,72  | 3,28  | 0,00041 | NM_006559    | NME6     |
| 8086899 | 1,25 | 2,38 | 0,10710 | 1,37  | 2,58  | 0,01067 | NM_005793    | ST3GAL6  |
| 8081219 | 1,25 | 2,37 | 0,04506 | 1,38  | 2,60  | 0,00826 | NM_006100    | FAM188B  |
| 8132097 | 1,25 | 2,37 | 0,00320 | 1,19  | 2,29  | 0,00558 | NM_032222    | MGC72080 |
| 8141169 | 1,25 | 2,37 | 0,12908 | 1,18  | 2,27  | 0,14844 | NR_002822    | QKI      |
| 8123315 | 1,25 | 2,37 | 0,00944 | 1,00  | 2,00  | 0,00374 | NM_206855    | RRS1     |
| 8146685 | 1,25 | 2,37 | 0,03245 | 2,15  | 4,43  | 0,00850 | NM_015169    | TAPT1    |
| 8099506 | 1,25 | 2,37 | 0,07481 | 2,75  | 6,75  | 0,00498 | NM_153365    | ENDOD1   |
| 7943293 | 1,25 | 2,37 | 0,04576 | 0,46  | 1,38  | 0,09193 | NM_015036    | NFYA     |
| 8119408 | 1,25 | 2,37 | 0,04938 | 2,93  | 7,64  | 0,00463 | NM_002505    | C1orf107 |
| 7909478 | 1,25 | 2,37 | 0,02354 | 2,50  | 5,65  | 0,00026 | NM_014388    | SEC62    |
| 8083826 | 1,25 | 2,37 | 0,03107 | 0,86  | 1,82  | 0,02903 | NM_003262    | CYB5R2   |
| 7946292 | 1,24 | 2,37 | 0,02982 | 1,53  | 2,88  | 0,00773 | NM_016229    | POFUT2   |
| 8070876 | 1,24 | 2,37 | 0,06674 | 0,60  | 1,52  | 0,03276 | NM_015227    | AGGF1    |
| 8106429 | 1,24 | 2,37 | 0,00764 | 1,68  | 3,21  | 0,00284 | NM_018046    | NKIRAS2  |
| 8007197 | 1,24 | 2,37 | 0,08403 | 3,01  | 8,03  | 0,00160 | NM_017595    | RUSC2    |
| 8155048 | 1,24 | 2,37 | 0,06725 | 1,30  | 2,45  | 0,01101 | NM_014806    | ---      |
| 8130403 | 1,24 | 2,37 | 0,12311 | 0,62  | 1,53  | 0,25493 | ---          | EXOC5    |
| 8095333 | 1,24 | 2,37 | 0,07519 | 1,41  | 2,65  | 0,03435 | NM_006544    | ERGIC1   |
| 8109999 | 1,24 | 2,37 | 0,01296 | 2,40  | 5,28  | 0,00197 | NM_001031711 | PDE9A    |
| 8068833 | 1,24 | 2,37 | 0,03101 | 2,20  | 4,59  | 0,00942 | NM_002606    | RSBN1    |

|         |      |      |         |       |       |         |                        |                |
|---------|------|------|---------|-------|-------|---------|------------------------|----------------|
| 7918681 | 1,24 | 2,37 | 0,01111 | 1,96  | 3,88  | 0,00241 | NM_018364              | TBC1D1         |
| 8094574 | 1,24 | 2,37 | 0,00944 | 1,62  | 3,07  | 0,00154 | NM_015173              | LAP3           |
| 8094259 | 1,24 | 2,37 | 0,02382 | 1,53  | 2,88  | 0,00185 | NM_015907              | C9orf72        |
| 8160531 | 1,24 | 2,37 | 0,10058 | 2,18  | 4,52  | 0,00618 | NM_018325              | SLC35B4        |
| 8143040 | 1,24 | 2,36 | 0,07121 | 2,65  | 6,28  | 0,00015 | NM_032826              | DET1           |
| 7991216 | 1,24 | 2,36 | 0,07306 | 2,17  | 4,51  | 0,00037 | NM_017996              | MRT04          |
| 7898549 | 1,24 | 2,36 | 0,07159 | 2,06  | 4,18  | 0,00097 | NM_016183              | CDC14A         |
| 7903334 | 1,24 | 2,36 | 0,13488 | 1,86  | 3,64  | 0,00171 | NM_003672              | RPS6KB1        |
| 8008887 | 1,24 | 2,36 | 0,11738 | 2,22  | 4,65  | 0,00027 | NM_003161              | POC5           |
| 8112709 | 1,24 | 2,36 | 0,02539 | 3,25  | 9,48  | 0,00095 | NM_001099271           | TMEM70         |
| 8146930 | 1,24 | 2,36 | 0,00230 | 2,49  | 5,61  | 0,00132 | NM_017866              | GLA            |
| 8174076 | 1,24 | 2,36 | 0,02480 | 2,72  | 6,60  | 0,00012 | NM_000169              | BCAS2          |
| 7918759 | 1,24 | 2,36 | 0,02739 | 2,14  | 4,40  | 0,00264 | NM_005872              | ARMCX2         |
| 8174092 | 1,24 | 2,36 | 0,01476 | -0,04 | -1,03 | 0,64856 | NM_014782              | NBN            |
| 8151711 | 1,24 | 2,36 | 0,10367 | 2,36  | 5,13  | 0,00801 | NM_002485              | SLTM           |
| 7989253 | 1,24 | 2,36 | 0,02614 | 2,74  | 6,67  | 0,00015 | NM_024755              | SH2D4A         |
| 8144880 | 1,24 | 2,36 | 0,07256 | 1,92  | 3,78  | 0,00174 | NM_022071              | SKP1           |
| 8114152 | 1,24 | 2,36 | 0,06399 | 0,64  | 1,55  | 0,01955 | NM_006930              | RPL18A         |
| 8154359 | 1,24 | 2,36 | 0,01767 | 0,76  | 1,69  | 0,02488 | AY779046 NF2           |                |
| 8072242 | 1,24 | 2,36 | 0,10397 | 3,02  | 8,14  | 0,00073 | NM_016418              | POLR3B         |
| 7958275 | 1,24 | 2,36 | 0,07632 | 1,81  | 3,51  | 0,00055 | NM_018082              | ADI1           |
| 8050071 | 1,24 | 2,36 | 0,01492 | 2,09  | 4,26  | 0,00409 | NM_018269              | MOCOS2         |
| 8112020 | 1,24 | 2,36 | 0,08620 | 2,22  | 4,67  | 0,00019 | NM_176806              | FKBP11         |
| 7962895 | 1,24 | 2,36 | 0,01001 | 1,00  | 2,01  | 0,06217 | NM_016594              | POLR1B         |
| 8044473 | 1,24 | 2,36 | 0,05461 | 2,05  | 4,14  | 0,00178 | NM_019014              | ---            |
| 8149953 | 1,23 | 2,35 | 0,07547 | 0,36  | 1,28  | 0,21140 | ---                    | RCL1           |
| 8154163 | 1,23 | 2,35 | 0,04023 | 3,30  | 9,83  | 0,00018 | NM_005772              | ZFPL1          |
| 7941127 | 1,23 | 2,35 | 0,03688 | 2,51  | 5,69  | 0,01967 | NM_006782              | HELQ           |
| 8101467 | 1,23 | 2,35 | 0,06602 | 2,00  | 3,99  | 0,00332 | NM_133636              | JHDM1D         |
| 8143341 | 1,23 | 2,35 | 0,07254 | 1,29  | 2,44  | 0,08130 | NM_030647              | SASS6          |
| 7917976 | 1,23 | 2,35 | 0,04120 | 2,30  | 4,91  | 0,00218 | NM_194292              | RWDD4A         |
| 8103881 | 1,23 | 2,35 | 0,02151 | 1,83  | 3,56  | 0,00233 | NM_152682              | NAP1L4         |
| 7945786 | 1,23 | 2,35 | 0,00152 | 2,29  | 4,88  | 0,00147 | NM_005969              | TPD52L1        |
| 8121838 | 1,23 | 2,35 | 0,01042 | 1,06  | 2,09  | 0,02093 | NM_001003395           | SAFB           |
| 8024936 | 1,23 | 2,35 | 0,01067 | 1,60  | 3,03  | 0,00734 | NM_002967              | NPIP           |
| 7993546 | 1,23 | 2,35 | 0,14734 | 1,93  | 3,80  | 0,00025 | NM_006985              | MTERFD1        |
| 8151917 | 1,23 | 2,35 | 0,00271 | 2,10  | 4,28  | 0,00275 | NM_015942              | PIP4K2C        |
| 7956524 | 1,23 | 2,35 | 0,03805 | 3,52  | 11,50 | 0,00007 | NM_024779              | RN7SK // RN7SK |
| 8120249 | 1,23 | 2,35 | 0,11104 | 1,48  | 2,78  | 0,00471 | NR_001445 // NR_001445 | UXS1           |
| 8054395 | 1,23 | 2,34 | 0,06064 | 2,47  | 5,52  | 0,00442 | NM_025076              | ZBTB1          |
| 7975068 | 1,23 | 2,34 | 0,07502 | 2,66  | 6,30  | 0,00324 | NM_001123329           | FAHD1          |
| 7992396 | 1,23 | 2,34 | 0,04484 | 1,30  | 2,45  | 0,05603 | NM_031208              | FBXO18         |
| 7925996 | 1,23 | 2,34 | 0,07531 | 2,45  | 5,46  | 0,00845 | NM_032807              | ULK2           |
| 8013399 | 1,23 | 2,34 | 0,06419 | 2,52  | 5,73  | 0,00263 | NM_014683              | RNF169         |
| 7942544 | 1,23 | 2,34 | 0,02699 | 1,76  | 3,39  | 0,00713 | NM_001098638           | NT5DC3         |
| 7965918 | 1,23 | 2,34 | 0,05054 | 2,36  | 5,14  | 0,00340 | NM_001031701           | KDM2A          |
| 7941769 | 1,23 | 2,34 | 0,02726 | 2,75  | 6,71  | 0,00036 | NM_012308              | DERL2          |
| 8011875 | 1,23 | 2,34 | 0,08446 | 3,81  | 14,05 | 0,00000 | NM_016041              | BDP1           |
| 8106025 | 1,22 | 2,34 | 0,02814 | 1,54  | 2,90  | 0,00336 | NM_018429              | TNFaip8        |
| 8107520 | 1,22 | 2,34 | 0,00041 | 0,07  | 1,05  | 0,76497 | NM_014350              | LRRC37A4       |
| 8016245 | 1,22 | 2,34 | 0,00484 | 3,02  | 8,10  | 0,00024 | NR_002940              | FAM58A         |
| 7967879 | 1,22 | 2,33 | 0,07556 | -0,14 | -1,10 | 0,73339 | NM_152274              | TBC1D14        |
| 8093976 | 1,22 | 2,33 | 0,00745 | 3,29  | 9,77  | 0,00002 | NM_020773              | RPL19          |
| 8006845 | 1,22 | 2,33 | 0,04286 | 0,25  | 1,19  | 0,45547 | NM_000981              | SCCPDH         |
| 7911155 | 1,22 | 2,33 | 0,07827 | 1,74  | 3,34  | 0,00073 | NM_016002              | GNAS           |
| 8063668 | 1,22 | 2,33 | 0,00060 | 1,44  | 2,71  | 0,00441 | NM_000516              | C21orf63       |
| 8068202 | 1,22 | 2,33 | 0,00767 | 0,89  | 1,85  | 0,02907 | NM_058187              | DDA1           |
| 8026729 | 1,22 | 2,33 | 0,06464 | 1,34  | 2,52  | 0,00065 | NM_024050              | XYLT2          |
| 8008297 | 1,22 | 2,33 | 0,07208 | 2,32  | 5,00  | 0,00486 | NM_022167              | ERLIN2         |
| 8145835 | 1,22 | 2,33 | 0,01321 | 1,27  | 2,42  | 0,00105 | NM_007175              | EZR            |
| 8130505 | 1,22 | 2,33 | 0,00979 | 2,33  | 5,02  | 0,00095 | NM_003379              | ANKRD46        |
| 8152053 | 1,22 | 2,33 | 0,11240 | 2,98  | 7,91  | 0,00009 | NM_198401              | ---            |
| 7896750 | 1,22 | 2,33 | 0,17832 | -1,28 | -2,43 | 0,21586 | ---                    | DAPK1          |
| 8156199 | 1,22 | 2,33 | 0,12982 | 1,52  | 2,87  | 0,00166 | NM_004938              | ITGB3BP        |
| 7916727 | 1,22 | 2,33 | 0,02181 | 1,94  | 3,84  | 0,00282 | NM_014288              | HSDL1          |
| 8003116 | 1,22 | 2,33 | 0,05518 | 2,57  | 5,95  | 0,00207 | NM_031463              | SASH1          |
| 8122637 | 1,22 | 2,33 | 0,08193 | 1,30  | 2,47  | 0,00599 | NM_015278              | ARHGAP26       |
| 8108873 | 1,22 | 2,33 | 0,00573 | 1,67  | 3,18  | 0,00269 | NM_015071              | LOC342541      |
| 8009094 | 1,22 | 2,33 | 0,05712 | 1,06  | 2,09  | 0,05880 | ENST00000416490        | ADCY9          |
| 7999079 | 1,22 | 2,33 | 0,00772 | 0,97  | 1,96  | 0,01331 | NM_001116              | LGALS3         |
| 7974461 | 1,22 | 2,33 | 0,12158 | 0,29  | 1,22  | 0,43838 | NR_003225              | TPRA1          |
| 8090420 | 1,22 | 2,32 | 0,01051 | 3,09  | 8,54  | 0,00037 | NM_016372              | AKAP6          |
| 7973850 | 1,22 | 2,32 | 0,13113 | 1,21  | 2,31  | 0,06507 | NM_004274              | ---            |

|         |      |      |         |       |       |         |                        |              |  |
|---------|------|------|---------|-------|-------|---------|------------------------|--------------|--|
| 7997489 | 1,22 | 2,32 | 0,06329 | 2,45  | 5,45  | 0,00004 | ---                    | BCAS3        |  |
| 8008933 | 1,22 | 2,32 | 0,00806 | 2,38  | 5,20  | 0,00187 | NM_001099432           | VPS13A       |  |
| 8155946 | 1,22 | 2,32 | 0,04123 | 2,66  | 6,34  | 0,00204 | NM_033305              | PDE3A        |  |
| 7954293 | 1,22 | 2,32 | 0,02983 | -1,45 | -2,74 | 0,02273 | NM_000921              | ZNF416       |  |
| 8039664 | 1,22 | 2,32 | 0,10545 | 1,20  | 2,29  | 0,01318 | NM_017879              | UBE2S        |  |
| 8012958 | 1,22 | 2,32 | 0,01822 | 1,68  | 3,22  | 0,00806 | NM_014501              | ADAMTS19     |  |
| 8107823 | 1,21 | 2,32 | 0,08454 | -0,83 | -1,78 | 0,05170 | NM_133638              | GJC1         |  |
| 8016094 | 1,21 | 2,32 | 0,06918 | 2,48  | 5,59  | 0,00493 | NM_005497              | TFE3         |  |
| 8172520 | 1,21 | 2,32 | 0,14987 | 2,35  | 5,10  | 0,01161 | NM_006521              | NDUFB8       |  |
| 7935810 | 1,21 | 2,32 | 0,00547 | 1,80  | 3,49  | 0,00548 | NM_005004              | CCNB1IP1     |  |
| 7977497 | 1,21 | 2,32 | 0,05597 | 0,46  | 1,38  | 0,07418 | NM_021178              | SIK3         |  |
| 7951873 | 1,21 | 2,32 | 0,07279 | 4,09  | 16,97 | 0,00003 | NM_025164              | NRXN3        |  |
| 7976012 | 1,21 | 2,32 | 0,07015 | -1,12 | -2,18 | 0,00035 | NM_004796              | BMS1         |  |
| 7927108 | 1,21 | 2,32 | 0,00331 | 1,16  | 2,24  | 0,08755 | NM_014753              | CYTH1        |  |
| 8018922 | 1,21 | 2,32 | 0,01180 | 3,06  | 8,35  | 0,00001 | NM_004762              | DNAJB4       |  |
| 7902512 | 1,21 | 2,32 | 0,14149 | 1,47  | 2,77  | 0,00517 | NM_007034              | MTCH1        |  |
| 8126066 | 1,21 | 2,31 | 0,04223 | 2,17  | 4,51  | 0,03415 | NM_014341              | C5orf33      |  |
| 8111552 | 1,21 | 2,31 | 0,11965 | 2,31  | 4,97  | 0,00155 | NM_001085411           | ZNF174       |  |
| 7992897 | 1,21 | 2,31 | 0,02144 | 1,93  | 3,81  | 0,00263 | NM_003450              | BRCA2        |  |
| 7968484 | 1,21 | 2,31 | 0,02186 | 1,96  | 3,90  | 0,00204 | NM_000059              | VAT1L        |  |
| 7997336 | 1,21 | 2,31 | 0,05437 | -1,89 | -3,72 | 0,00306 | NM_020927              | TBCB         |  |
| 8028162 | 1,21 | 2,31 | 0,04049 | 2,85  | 7,20  | 0,00567 | NM_001281              | ADAMTSL1     |  |
| 8154491 | 1,21 | 2,31 | 0,00281 | -0,89 | -1,85 | 0,11935 | NM_001040272           | KIAA0562     |  |
| 7911870 | 1,21 | 2,31 | 0,00583 | 0,02  | 1,01  | 0,94630 | NM_014704              | CREBL2       |  |
| 7954021 | 1,21 | 2,31 | 0,07847 | 1,69  | 3,22  | 0,00146 | NM_001310              | CKAP2L       |  |
| 8054702 | 1,21 | 2,31 | 0,04470 | 1,34  | 2,53  | 0,02929 | NM_152515              | MALL         |  |
| 8054479 | 1,21 | 2,31 | 0,00388 | 1,12  | 2,18  | 0,01812 | NM_005434              | PTMA // PTMA |  |
| 7961022 | 1,21 | 2,31 | 0,12502 | 2,47  | 5,52  | 0,00015 | NM_002823 // NM_002823 | MED4         |  |
| 7971550 | 1,21 | 2,31 | 0,11563 | 0,71  | 1,64  | 0,09129 | NM_014166              | IP6K1        |  |
| 8087473 | 1,21 | 2,31 | 0,01194 | 2,02  | 4,05  | 0,01153 | NM_153273              | DNASE2       |  |
| 8034565 | 1,21 | 2,31 | 0,00316 | 1,21  | 2,31  | 0,00735 | NM_001375              | SNRNP48      |  |
| 8116807 | 1,20 | 2,31 | 0,11335 | 3,41  | 10,65 | 0,00066 | NM_152551              | ZNF770       |  |
| 7987361 | 1,20 | 2,30 | 0,05359 | 2,56  | 5,89  | 0,00139 | NM_014106              | C12orf11     |  |
| 7961964 | 1,20 | 2,30 | 0,02277 | 2,14  | 4,39  | 0,00300 | NM_018164              | MAPRE2       |  |
| 8020878 | 1,20 | 2,30 | 0,02004 | 1,90  | 3,73  | 0,00019 | NM_014268              | GSTM4        |  |
| 7903742 | 1,20 | 2,30 | 0,08311 | 3,81  | 14,03 | 0,00027 | NM_000850              | SLC35C1      |  |
| 7939590 | 1,20 | 2,30 | 0,07863 | 1,60  | 3,03  | 0,00845 | NM_018389              | PRPF4B       |  |
| 8116664 | 1,20 | 2,30 | 0,02978 | 1,86  | 3,64  | 0,00290 | NM_003913              | CSRNP2       |  |
| 7963235 | 1,20 | 2,30 | 0,04821 | 2,49  | 5,62  | 0,00204 | NM_030809              | NARG2        |  |
| 7989347 | 1,20 | 2,30 | 0,12906 | 2,81  | 7,02  | 0,00108 | NM_024611              | LOC100130331 |  |
| 7910901 | 1,20 | 2,30 | 0,17513 | 0,50  | 1,41  | 0,73304 | NR_027247              | TAFL10       |  |
| 7946221 | 1,20 | 2,30 | 0,01349 | 1,53  | 2,88  | 0,02254 | NM_006284              | MICA         |  |
| 8118100 | 1,20 | 2,30 | 0,03981 | 2,22  | 4,66  | 0,00121 | NM_001177519           | HIST1H1C     |  |
| 8124397 | 1,20 | 2,30 | 0,01361 | 1,08  | 2,12  | 0,01110 | NM_005319              | RPL7L1       |  |
| 8119595 | 1,20 | 2,30 | 0,04689 | 2,62  | 6,14  | 0,00197 | NM_198486              | COX4NB       |  |
| 8003217 | 1,20 | 2,29 | 0,05047 | 2,25  | 4,75  | 0,00016 | NM_006067              | IPO13        |  |
| 7900888 | 1,20 | 2,29 | 0,02899 | 2,07  | 4,20  | 0,00298 | NM_014652              | ALDOA        |  |
| 7994737 | 1,20 | 2,29 | 0,05158 | 1,72  | 3,29  | 0,00106 | NM_000034              | ZNF621       |  |
| 8079005 | 1,20 | 2,29 | 0,00715 | 1,02  | 2,03  | 0,00820 | NM_198484              | PSMB9        |  |
| 8118571 | 1,20 | 2,29 | 0,01365 | 0,24  | 1,18  | 0,27028 | NM_002800              | PSMB9        |  |
| 8178211 | 1,20 | 2,29 | 0,01365 | 0,24  | 1,18  | 0,27028 | NM_002800              | PSMB9        |  |
| 8179495 | 1,20 | 2,29 | 0,01365 | 0,24  | 1,18  | 0,27028 | NM_002800              | LRRC57       |  |
| 7987916 | 1,20 | 2,29 | 0,11427 | 1,51  | 2,86  | 0,00488 | NM_153260              | PGM5P2       |  |
| 8161520 | 1,19 | 2,29 | 0,08852 | 0,38  | 1,30  | 0,47198 | NR_002836              | GSTM2        |  |
| 7903753 | 1,19 | 2,29 | 0,02125 | 1,69  | 3,22  | 0,04557 | NM_000848              | PARP12       |  |
| 8143327 | 1,19 | 2,29 | 0,03597 | 2,29  | 4,88  | 0,00305 | NM_022750              | AP3M2        |  |
| 8146159 | 1,19 | 2,29 | 0,04576 | 1,99  | 3,98  | 0,00046 | NM_001134296           | SERPINB6     |  |
| 8123621 | 1,19 | 2,29 | 0,03001 | 1,92  | 3,79  | 0,00668 | NM_004568              | C17orf80     |  |
| 8009552 | 1,19 | 2,29 | 0,03122 | 2,15  | 4,43  | 0,00073 | NM_017941              | SNORD116-5   |  |
| 7981958 | 1,19 | 2,29 | 0,22058 | -2,83 | -7,11 | 0,01296 | NR_003320              | SNORD116-5   |  |
| 7981962 | 1,19 | 2,29 | 0,22058 | -2,83 | -7,11 | 0,01296 | NR_003320              | TIMP3        |  |
| 8072626 | 1,19 | 2,28 | 0,16304 | -1,18 | -2,26 | 0,00878 | NM_000362              | RPS19        |  |
| 8029129 | 1,19 | 2,28 | 0,06059 | 1,70  | 3,24  | 0,00429 | NM_001022              | RNF20        |  |
| 8156945 | 1,19 | 2,28 | 0,03477 | 2,68  | 6,42  | 0,00046 | NM_019592              | RBM4         |  |
| 7941709 | 1,19 | 2,28 | 0,10174 | 2,73  | 6,65  | 0,00106 | NM_002896              | TXNDC17      |  |
| 8004175 | 1,19 | 2,28 | 0,00293 | 1,15  | 2,22  | 0,02365 | NM_032731              | SMEK1        |  |
| 7980833 | 1,19 | 2,28 | 0,09434 | 2,57  | 5,92  | 0,00064 | NM_032560              | MYOCD        |  |
| 8005048 | 1,19 | 2,28 | 0,10544 | -1,35 | -2,54 | 0,00181 | NM_001146312           | ---          |  |
| 8089230 | 1,19 | 2,28 | 0,20145 | 2,45  | 5,47  | 0,03964 | ---                    | QRSL1        |  |
| 8121300 | 1,19 | 2,28 | 0,11319 | 2,02  | 4,06  | 0,00123 | NM_018292              | IGFBP7       |  |
| 8100541 | 1,19 | 2,28 | 0,03077 | -1,67 | -3,18 | 0,00015 | NM_001553              | MDC1         |  |
| 8124813 | 1,19 | 2,28 | 0,00854 | 2,16  | 4,47  | 0,00116 | NM_014641              | MDC1         |  |
| 8178404 | 1,19 | 2,28 | 0,00854 | 2,16  | 4,47  | 0,00116 | NM_014641              | PRPF19       |  |

|         |      |      |         |       |       |         |                        |                 |
|---------|------|------|---------|-------|-------|---------|------------------------|-----------------|
| 7948476 | 1,19 | 2,28 | 0,02811 | 4,10  | 17,14 | 0,00011 | NM_014502              | NUP160          |
| 7947991 | 1,19 | 2,28 | 0,05407 | 3,06  | 8,32  | 0,00029 | NM_015231              | KIAA1462        |
| 7932826 | 1,19 | 2,28 | 0,05851 | -0,07 | -1,05 | 0,73656 | NM_020848              | ---             |
| 8072122 | 1,19 | 2,28 | 0,47233 | 0,49  | 1,40  | 0,57062 | --- YLPM1              | ---             |
| 7975725 | 1,19 | 2,28 | 0,06031 | 2,81  | 7,01  | 0,00043 | NM_019589              | FAM102A         |
| 8164343 | 1,19 | 2,27 | 0,04202 | 3,11  | 8,61  | 0,00384 | NM_001035254           | TMEM135         |
| 7942964 | 1,19 | 2,27 | 0,02165 | 1,40  | 2,64  | 0,00182 | NM_022918              | SMG1            |
| 8002333 | 1,19 | 2,27 | 0,04138 | 2,37  | 5,17  | 0,00462 | NM_015092              | SP110           |
| 8059650 | 1,18 | 2,27 | 0,11530 | 0,01  | 1,01  | 0,95549 | NM_080424              | TUBE1           |
| 8128977 | 1,18 | 2,27 | 0,19001 | 3,86  | 14,50 | 0,00090 | NM_016262              | TMEFF1          |
| 8156905 | 1,18 | 2,27 | 0,16030 | 1,86  | 3,62  | 0,02730 | NM_003692              | UTP20           |
| 7957890 | 1,18 | 2,27 | 0,06549 | 2,46  | 5,49  | 0,00670 | NM_014503              | PLOD3           |
| 8141688 | 1,18 | 2,27 | 0,01547 | 0,81  | 1,75  | 0,20218 | NM_001084              | MPPE1           |
| 8022326 | 1,18 | 2,27 | 0,05507 | 3,80  | 13,92 | 0,00001 | NM_023075              | GALC            |
| 7980580 | 1,18 | 2,27 | 0,04187 | 2,46  | 5,52  | 0,00229 | NM_000153              | ATAD2B          |
| 8050658 | 1,18 | 2,27 | 0,02486 | 2,33  | 5,03  | 0,00321 | NM_017552              | PARD3           |
| 7933010 | 1,18 | 2,27 | 0,02338 | 1,34  | 2,54  | 0,00306 | NM_019619              | ARFIP2          |
| 7946201 | 1,18 | 2,27 | 0,08934 | 2,59  | 6,04  | 0,00061 | NM_012402              | CMBL            |
| 8110971 | 1,18 | 2,27 | 0,16407 | 2,22  | 4,66  | 0,00257 | NM_138809              | HIST2H2BA       |
| 7904465 | 1,18 | 2,26 | 0,13762 | 1,86  | 3,62  | 0,01605 | NR_027337              | MCTP1           |
| 8113130 | 1,18 | 2,26 | 0,09500 | 0,41  | 1,33  | 0,08588 | NM_024717              | PHF19           |
| 8163807 | 1,18 | 2,26 | 0,04327 | 3,21  | 9,22  | 0,00049 | NM_015651              | CC2D2A          |
| 8094190 | 1,18 | 2,26 | 0,02829 | 1,69  | 3,23  | 0,00453 | NM_001080522           | TBC1D8B         |
| 8169186 | 1,18 | 2,26 | 0,04534 | -0,21 | -1,15 | 0,21396 | NM_017752              | PTMA // PTMA    |
| 7954006 | 1,18 | 2,26 | 0,06396 | 2,56  | 5,90  | 0,00016 | NM_002823 // NM_002823 | C17orf48        |
| 8004940 | 1,18 | 2,26 | 0,06214 | 0,55  | 1,46  | 0,08839 | NM_020233              | ANXA2P1         |
| 8103240 | 1,18 | 2,26 | 0,05495 | 0,58  | 1,50  | 0,00104 | NR_001562              | TLL1            |
| 8076547 | 1,18 | 2,26 | 0,04411 | 1,28  | 2,43  | 0,02106 | NR_027779              | ZNF383          |
| 8028227 | 1,17 | 2,26 | 0,04933 | 2,11  | 4,30  | 0,00235 | NM_152604              | IER3            |
| 8124848 | 1,17 | 2,26 | 0,06729 | 2,25  | 4,77  | 0,00014 | NM_003897              | IER3            |
| 8179704 | 1,17 | 2,26 | 0,06729 | 2,25  | 4,77  | 0,00014 | NM_003897              | ZNF382          |
| 8028194 | 1,17 | 2,26 | 0,07135 | 2,92  | 7,59  | 0,00088 | NM_032825              | PDZRN3          |
| 8088848 | 1,17 | 2,26 | 0,05999 | -1,31 | -2,48 | 0,00432 | NM_015009              | SKA3            |
| 7970513 | 1,17 | 2,26 | 0,10646 | 1,97  | 3,92  | 0,01605 | NM_145061              | ZNF347          |
| 8039054 | 1,17 | 2,26 | 0,05605 | 0,72  | 1,65  | 0,09390 | NM_001172674           | CREB3L2         |
| 8143188 | 1,17 | 2,26 | 0,03755 | 1,84  | 3,58  | 0,00175 | NM_194071              | NDUFAF3         |
| 8079707 | 1,17 | 2,26 | 0,07691 | 2,06  | 4,16  | 0,00619 | NM_199069              | AS3MT           |
| 7930181 | 1,17 | 2,25 | 0,04521 | 2,22  | 4,66  | 0,00311 | NM_020682              | CCDC109B        |
| 8096808 | 1,17 | 2,25 | 0,11482 | 1,90  | 3,72  | 0,00078 | NM_017918              | EDA2R           |
| 8173299 | 1,17 | 2,25 | 0,20020 | -1,09 | -2,12 | 0,00019 | NM_021783              | CBWD5           |
| 8155422 | 1,17 | 2,25 | 0,02312 | 1,71  | 3,27  | 0,01116 | BC043420 FLRT2         |                 |
| 7976073 | 1,17 | 2,25 | 0,06668 | -0,92 | -1,90 | 0,00122 | NM_013231              | ZDHHC4          |
| 8131414 | 1,17 | 2,25 | 0,03676 | 2,94  | 7,69  | 0,00346 | NM_001134387           | MKL2            |
| 7993310 | 1,17 | 2,25 | 0,05092 | 1,72  | 3,29  | 0,03473 | NM_014048              | PLBD1           |
| 7961440 | 1,17 | 2,25 | 0,01140 | 1,91  | 3,75  | 0,00174 | NM_024829              | FAM172A         |
| 8113083 | 1,17 | 2,25 | 0,06636 | 0,66  | 1,57  | 0,03547 | NM_032042              | BIVM            |
| 7969916 | 1,17 | 2,25 | 0,00339 | 1,34  | 2,54  | 0,00547 | NM_017693              | PLEKHO1         |
| 7905116 | 1,17 | 2,25 | 0,00242 | -0,38 | -1,30 | 0,21927 | NM_016274              | POMZP3          |
| 8140433 | 1,17 | 2,25 | 0,02470 | 1,28  | 2,42  | 0,00343 | NM_012230              | TSLP            |
| 8107270 | 1,17 | 2,25 | 0,00538 | -1,38 | -2,59 | 0,01969 | NM_033035              | ZMAT2           |
| 8108620 | 1,17 | 2,25 | 0,04131 | 2,32  | 4,99  | 0,00420 | NM_144723              | RAP2C           |
| 8175169 | 1,17 | 2,25 | 0,01427 | -0,14 | -1,11 | 0,52136 | NM_021183              | HERC2P2         |
| 7982154 | 1,17 | 2,25 | 0,00349 | 2,85  | 7,22  | 0,00500 | NR_002824              | ZMYM6           |
| 7914764 | 1,17 | 2,25 | 0,07100 | 1,86  | 3,64  | 0,00171 | NM_007167              | COL5A2          |
| 8057620 | 1,17 | 2,25 | 0,02066 | -0,39 | -1,31 | 0,00302 | NM_000393              | HTR2B           |
| 8059680 | 1,17 | 2,25 | 0,14117 | -0,66 | -1,58 | 0,05741 | NM_000867              | C22orf30        |
| 8075542 | 1,17 | 2,25 | 0,00258 | 1,82  | 3,54  | 0,00018 | NM_173566              | MRPS9           |
| 8044111 | 1,17 | 2,25 | 0,00972 | 1,40  | 2,65  | 0,00604 | NM_182640              | TDP2            |
| 8124262 | 1,17 | 2,25 | 0,14068 | 2,09  | 4,27  | 0,00375 | NM_016614              | RBBP6           |
| 7994161 | 1,17 | 2,25 | 0,02905 | 2,12  | 4,35  | 0,00037 | NM_006910              | TNFRSF10B       |
| 8149733 | 1,17 | 2,25 | 0,04373 | 3,03  | 8,17  | 0,00260 | NM_003842              | ZNF808          |
| 8030946 | 1,17 | 2,25 | 0,01939 | 0,66  | 1,58  | 0,04003 | NM_001039886           | MRPS10          |
| 8126394 | 1,17 | 2,25 | 0,19732 | 1,96  | 3,88  | 0,00043 | NM_018141              | ANKHD1-EIF4EBP3 |
| 8108510 | 1,17 | 2,25 | 0,00401 | 2,01  | 4,03  | 0,00015 | NM_020690              | NSD1            |
| 8110289 | 1,17 | 2,25 | 0,00748 | 1,89  | 3,72  | 0,00091 | NM_022455              | RERE            |
| 7912166 | 1,17 | 2,25 | 0,05493 | 1,56  | 2,94  | 0,00284 | NM_012102              | CLK3            |
| 7984846 | 1,17 | 2,24 | 0,02286 | 0,94  | 1,92  | 0,00075 | NM_001130028           | DCAF13          |
| 8147785 | 1,17 | 2,24 | 0,00886 | 0,84  | 1,79  | 0,07671 | NM_015420              | RAD17           |
| 8177478 | 1,17 | 2,24 | 0,05785 | 2,56  | 5,89  | 0,01063 | NM_133338              | PIAS2           |
| 8023133 | 1,16 | 2,24 | 0,06970 | 1,23  | 2,34  | 0,01571 | NM_004671              | MYST3           |
| 8150491 | 1,16 | 2,24 | 0,12465 | 2,16  | 4,47  | 0,00345 | NM_001099412           | PHTF1           |
| 7918634 | 1,16 | 2,24 | 0,10354 | 1,48  | 2,78  | 0,00114 | NM_006608              | ADIPOR2         |
| 7953021 | 1,16 | 2,24 | 0,01400 | 3,54  | 11,61 | 0,00001 | NM_024551              | KCTD7           |



|         |      |      |         |       |       |         |              |           |
|---------|------|------|---------|-------|-------|---------|--------------|-----------|
| 8133167 | 1,16 | 2,24 | 0,05181 | 2,03  | 4,08  | 0,00024 | NM_153033    | MORC4     |
| 8174338 | 1,16 | 2,24 | 0,00312 | 1,42  | 2,68  | 0,02085 | NM_024657    | RANBP17   |
| 8109938 | 1,16 | 2,23 | 0,00943 | 3,19  | 9,13  | 0,00077 | NM_022897    | MAP3K4    |
| 8123274 | 1,16 | 2,23 | 0,00726 | 1,99  | 3,97  | 0,00017 | NM_005922    | P704P     |
| 7977454 | 1,16 | 2,23 | 0,07573 | 0,21  | 1,15  | 0,21955 | NM_001145442 | GTF2IRD2B |
| 8133549 | 1,16 | 2,23 | 0,03393 | 1,59  | 3,00  | 0,00053 | NM_001003795 | FIBIN     |
| 7939052 | 1,16 | 2,23 | 0,05086 | -0,74 | -1,67 | 0,03701 | NM_203371    | CD99L2    |
| 8175647 | 1,16 | 2,23 | 0,00973 | 1,51  | 2,86  | 0,00315 | NM_031462    | PSMA7     |
| 8067382 | 1,16 | 2,23 | 0,08023 | 1,75  | 3,36  | 0,00041 | NM_002792    | ACADSB    |
| 7931168 | 1,16 | 2,23 | 0,05363 | 2,00  | 4,00  | 0,00163 | NM_001609    | SORBS2    |
| 8104035 | 1,16 | 2,23 | 0,03746 | -1,01 | -2,01 | 0,00025 | NM_021069    | RETSAT    |
| 8053406 | 1,16 | 2,23 | 0,04009 | 1,95  | 3,87  | 0,01309 | NM_017750    | LPGAT1    |
| 7924107 | 1,15 | 2,23 | 0,27218 | 3,31  | 9,92  | 0,00016 | NM_014873    | VPS8      |
| 8084541 | 1,15 | 2,23 | 0,04639 | 2,65  | 6,26  | 0,00014 | NM_001009921 | TAPBP     |
| 8178977 | 1,15 | 2,23 | 0,00730 | 1,73  | 3,32  | 0,02217 | NM_172208    | MED19     |
| 7948293 | 1,15 | 2,23 | 0,01381 | 0,39  | 1,31  | 0,11258 | NM_153450    | ZNF880    |
| 8030925 | 1,15 | 2,22 | 0,07440 | 0,03  | 1,02  | 0,87495 | NM_001145434 | HSP90AB2P |
| 8094165 | 1,15 | 2,22 | 0,02448 | 1,17  | 2,26  | 0,02556 | NR_003132    | KLC1      |
| 7977127 | 1,15 | 2,22 | 0,07542 | 3,15  | 8,90  | 0,00142 | NM_001130107 | TEAD3     |
| 8125887 | 1,15 | 2,22 | 0,08516 | 0,59  | 1,51  | 0,15989 | NM_003214    | ---       |
| 8045088 | 1,15 | 2,22 | 0,37398 | -3,25 | -9,49 | 0,00049 | ---          | SDHAP2    |
| 8084904 | 1,15 | 2,22 | 0,10844 | 2,62  | 6,16  | 0,00246 | NR_003265    | ---       |
| 7946567 | 1,15 | 2,22 | 0,09503 | -2,97 | -7,84 | 0,00056 | ---          | ALG10B    |
| 7954789 | 1,15 | 2,22 | 0,05114 | 2,42  | 5,35  | 0,00099 | NM_001013620 | LIMCH1    |
| 8094789 | 1,15 | 2,22 | 0,02719 | 0,29  | 1,23  | 0,19735 | NM_014988    | GTF2IRD2  |
| 8140170 | 1,15 | 2,22 | 0,01840 | 1,55  | 2,92  | 0,00065 | NM_173537    | NFIX      |
| 8026139 | 1,15 | 2,22 | 0,00982 | 0,22  | 1,17  | 0,37007 | NM_002501    | MCPH1     |
| 8144361 | 1,15 | 2,22 | 0,00254 | 1,27  | 2,41  | 0,13627 | NM_024596    | PLXNA1    |
| 8082314 | 1,15 | 2,22 | 0,01329 | 3,31  | 9,93  | 0,00109 | NM_032242    | RIOK1     |
| 8116760 | 1,15 | 2,22 | 0,00335 | 2,67  | 6,35  | 0,00111 | NM_031480    | TSN       |
| 8044965 | 1,15 | 2,22 | 0,09241 | 1,58  | 2,98  | 0,00046 | NM_004622    | FLNC      |
| 8135990 | 1,15 | 2,22 | 0,04682 | 1,02  | 2,03  | 0,11732 | NM_001458    | GPATCH2   |
| 7924327 | 1,15 | 2,22 | 0,15091 | 1,19  | 2,28  | 0,03186 | NM_018040    | GUSBP3    |
| 8112469 | 1,15 | 2,22 | 0,16706 | 1,88  | 3,67  | 0,00555 | NR_027386    | ECHDC1    |
| 8129379 | 1,15 | 2,22 | 0,10809 | 2,06  | 4,16  | 0,00762 | NM_001002030 | XPO5      |
| 8126588 | 1,15 | 2,22 | 0,15776 | 3,55  | 11,73 | 0,00043 | NM_020750    | CDKN2AIP  |
| 8098500 | 1,15 | 2,22 | 0,12553 | 0,83  | 1,77  | 0,03422 | NM_017632    | KCTD18    |
| 8058118 | 1,15 | 2,21 | 0,13660 | 1,03  | 2,04  | 0,00259 | NM_152387    | CASC2     |
| 7930861 | 1,15 | 2,21 | 0,03153 | -0,20 | -1,15 | 0,43427 | NR_026939    | AK5       |
| 7902452 | 1,15 | 2,21 | 0,09080 | -0,73 | -1,66 | 0,01805 | NM_174858    | RNU1-1    |
| 7973896 | 1,15 | 2,21 | 0,05881 | -1,21 | -2,32 | 0,10090 | NR_004430    | RNU1-1    |
| 7978568 | 1,15 | 2,21 | 0,05881 | -1,21 | -2,32 | 0,10090 | NR_004430    | RAD23A    |
| 8026122 | 1,14 | 2,21 | 0,12559 | 2,01  | 4,02  | 0,00991 | NM_005053    | SLC9A1    |
| 7914021 | 1,14 | 2,21 | 0,04729 | 2,34  | 5,07  | 0,00044 | NM_003047    | HIST2H2BF |
| 7919606 | 1,14 | 2,21 | 0,06149 | 1,11  | 2,16  | 0,01910 | NM_001024599 | PSMC6     |
| 7974380 | 1,14 | 2,21 | 0,01192 | 2,06  | 4,18  | 0,00028 | NM_002806    | TOMM22    |
| 7930870 | 1,14 | 2,21 | 0,54245 | 3,19  | 9,14  | 0,01258 | NM_020243    | AQP3      |
| 8160670 | 1,14 | 2,21 | 0,03428 | 2,65  | 6,27  | 0,00215 | NM_004925    | WDR47     |
| 7918275 | 1,14 | 2,21 | 0,17666 | 1,82  | 3,54  | 0,00405 | NM_001142550 | TMEM144   |
| 8098041 | 1,14 | 2,21 | 0,02906 | 1,70  | 3,26  | 0,02765 | NM_018342    | TRIM16L   |
| 8005475 | 1,14 | 2,21 | 0,11041 | 2,84  | 7,18  | 0,00071 | NM_001037330 | BTD       |
| 8078147 | 1,14 | 2,21 | 0,23357 | 1,41  | 2,65  | 0,02627 | NM_000060    | PLK1      |
| 7994109 | 1,14 | 2,21 | 0,05231 | 2,38  | 5,19  | 0,00509 | NM_005030    | TK2       |
| 8001818 | 1,14 | 2,21 | 0,16250 | 2,40  | 5,27  | 0,00054 | NM_004614    | LRP8      |
| 7916282 | 1,14 | 2,21 | 0,01680 | 3,57  | 11,86 | 0,00042 | NM_004631    | PIP5K1A   |
| 7905365 | 1,14 | 2,21 | 0,25888 | 4,79  | 27,68 | 0,00036 | NM_001135638 | CCDC132   |
| 8134219 | 1,14 | 2,21 | 0,02330 | 1,97  | 3,91  | 0,01154 | NM_017667    | MLH3      |
| 7980246 | 1,14 | 2,20 | 0,02325 | 2,45  | 5,46  | 0,00232 | NM_001040108 | SORD      |
| 7983393 | 1,14 | 2,20 | 0,07501 | 3,30  | 9,82  | 0,00024 | NM_003104    | HLA-F     |
| 8177717 | 1,14 | 2,20 | 0,04822 | 2,27  | 4,82  | 0,00982 | NM_018950    | FITM2     |
| 8066407 | 1,14 | 2,20 | 0,03591 | 1,84  | 3,57  | 0,00541 | NM_001080472 | BST1      |
| 8094228 | 1,14 | 2,20 | 0,14158 | 1,04  | 2,05  | 0,05396 | NM_004334    | CUTA      |
| 8125752 | 1,14 | 2,20 | 0,04954 | 2,82  | 7,08  | 0,00024 | NM_015921    | SLC5A6    |
| 8051030 | 1,14 | 2,20 | 0,02410 | 3,47  | 11,06 | 0,00234 | NM_021095    | POT1      |
| 8142697 | 1,14 | 2,20 | 0,14630 | 1,91  | 3,76  | 0,00180 | NM_015450    | CHEK2     |
| 8075164 | 1,14 | 2,20 | 0,02314 | 2,29  | 4,88  | 0,00020 | NM_001005735 | CASP1     |
| 7951397 | 1,14 | 2,20 | 0,09528 | -1,42 | -2,67 | 0,01767 | NM_033292    | GXYLT1    |
| 7962349 | 1,14 | 2,20 | 0,29258 | 2,30  | 4,91  | 0,00399 | NM_173601    | ---       |
| 8165646 | 1,14 | 2,20 | 0,14656 | -1,09 | -2,12 | 0,03737 | ---          | PEX1      |
| 8140915 | 1,14 | 2,20 | 0,09497 | 1,85  | 3,61  | 0,01563 | NM_000466    | GTF2H2    |
| 8112538 | 1,14 | 2,20 | 0,00360 | 1,85  | 3,59  | 0,00236 | NM_001515    | GTF2H2    |
| 8177507 | 1,14 | 2,20 | 0,00360 | 1,85  | 3,59  | 0,00236 | NM_001515    | DIS3      |
| 7971967 | 1,14 | 2,20 | 0,03881 | 1,53  | 2,89  | 0,01885 | NM_014953    | SYTL2     |

|         |      |      |         |       |       |         |              |          |
|---------|------|------|---------|-------|-------|---------|--------------|----------|
| 7950810 | 1,13 | 2,20 | 0,03023 | -0,06 | -1,04 | 0,80471 | NM_206927    | AATF     |
| 8006690 | 1,13 | 2,20 | 0,10014 | 2,60  | 6,05  | 0,00006 | NM_012138    | GUSBP3   |
| 8112564 | 1,13 | 2,19 | 0,17270 | 1,91  | 3,76  | 0,00553 | NR_027386    | TRMT112  |
| 7949075 | 1,13 | 2,19 | 0,17292 | 4,45  | 21,83 | 0,00059 | NM_016404    | NLN      |
| 8105663 | 1,13 | 2,19 | 0,02556 | 2,03  | 4,09  | 0,00101 | NM_020726    | MTMR6    |
| 7970655 | 1,13 | 2,19 | 0,01038 | 2,19  | 4,56  | 0,00324 | NM_004685    | MTHFD1L  |
| 8161484 | 1,13 | 2,19 | 0,02239 | 0,87  | 1,82  | 0,01305 | NM_015440    | MRPL32   |
| 8132458 | 1,13 | 2,19 | 0,13569 | 0,47  | 1,39  | 0,08092 | NM_031903    | TRAPP310 |
| 8068974 | 1,13 | 2,19 | 0,00328 | 2,30  | 4,93  | 0,00495 | NM_003274    | NUSAP1   |
| 7982889 | 1,13 | 2,19 | 0,05798 | 2,27  | 4,82  | 0,08701 | NM_016359    | PLEKHH2  |
| 8041644 | 1,13 | 2,19 | 0,06402 | 1,14  | 2,20  | 0,00304 | NM_172069    | DBNL     |
| 8132539 | 1,13 | 2,19 | 0,00328 | 1,01  | 2,02  | 0,15058 | NM_014063    | CCT8     |
| 8069753 | 1,13 | 2,19 | 0,09915 | 1,18  | 2,27  | 0,06326 | NM_006585    | ETS2     |
| 8068593 | 1,13 | 2,19 | 0,09460 | 3,46  | 10,99 | 0,00020 | NM_005239    | RPL5     |
| 7903010 | 1,13 | 2,19 | 0,00043 | 0,86  | 1,81  | 0,00269 | NM_000969    | C11orf63 |
| 7944751 | 1,13 | 2,19 | 0,03673 | 0,08  | 1,05  | 0,76605 | NM_024806    | GRIK2    |
| 8121225 | 1,13 | 2,19 | 0,06741 | -0,26 | -1,20 | 0,20038 | NM_175768    | MRPL43   |
| 7935819 | 1,13 | 2,19 | 0,02345 | 2,42  | 5,35  | 0,00042 | NM_032112    | TSC22D3  |
| 8174361 | 1,13 | 2,19 | 0,02302 | 2,57  | 5,94  | 0,00232 | NM_198057    | TPRKB    |
| 8053036 | 1,13 | 2,19 | 0,01389 | 1,26  | 2,39  | 0,06329 | NM_016058    | AP2S1    |
| 8037847 | 1,13 | 2,19 | 0,02410 | 0,86  | 1,81  | 0,11407 | NM_004069    | HNRNPA3  |
| 8080991 | 1,13 | 2,19 | 0,19626 | 1,14  | 2,20  | 0,03155 | NM_194247    | PRTFDC1  |
| 7932584 | 1,13 | 2,19 | 0,04104 | 2,57  | 5,95  | 0,00402 | NM_020200    | ADCY3    |
| 8050766 | 1,13 | 2,19 | 0,00291 | 3,71  | 13,12 | 0,00258 | NM_004036    | POLI     |
| 8021275 | 1,13 | 2,18 | 0,07831 | 0,91  | 1,88  | 0,07149 | NM_007195    | MBTPS2   |
| 8166382 | 1,13 | 2,18 | 0,01013 | 1,46  | 2,75  | 0,00266 | NM_015884    | DCAF7    |
| 8009164 | 1,13 | 2,18 | 0,06344 | 3,38  | 10,40 | 0,00061 | NM_005828    | KHDRBS3  |
| 8148448 | 1,13 | 2,18 | 0,05113 | -1,16 | -2,23 | 0,01096 | NM_006558    | ---      |
| 8165650 | 1,13 | 2,18 | 0,42116 | -1,49 | -2,81 | 0,00112 | ---          | RASA4    |
| 8141843 | 1,13 | 2,18 | 0,11836 | 1,48  | 2,79  | 0,30055 | NM_006989    | NDEL1    |
| 8004867 | 1,13 | 2,18 | 0,04632 | 3,14  | 8,79  | 0,00004 | NM_001025579 | SFMBT2   |
| 7931951 | 1,13 | 2,18 | 0,08007 | 3,45  | 10,92 | 0,00042 | NM_001029880 | RAB7L1   |
| 7923812 | 1,12 | 2,18 | 0,04568 | 2,03  | 4,07  | 0,00088 | NM_003929    | MT1B     |
| 7995820 | 1,12 | 2,18 | 0,00102 | 0,77  | 1,70  | 0,01858 | NM_005947    | FRYL     |
| 8100292 | 1,12 | 2,18 | 0,05644 | 0,58  | 1,49  | 0,30339 | NM_015030    | FAM1111A |
| 7940153 | 1,12 | 2,18 | 0,03936 | 1,60  | 3,02  | 0,00918 | NM_022074    | RPL10    |
| 8170859 | 1,12 | 2,18 | 0,03661 | 3,03  | 8,14  | 0,04881 | NR_026898    | PFKFB3   |
| 7926037 | 1,12 | 2,18 | 0,00344 | 2,60  | 6,07  | 0,00042 | NM_004566    | ZBTB26   |
| 8164002 | 1,12 | 2,18 | 0,11779 | 1,12  | 2,17  | 0,08501 | NM_020924    | FOSL2    |
| 8041048 | 1,12 | 2,18 | 0,00006 | 1,71  | 3,26  | 0,00954 | NM_005253    | UBE2E3   |
| 8046685 | 1,12 | 2,18 | 0,29734 | 1,99  | 3,98  | 0,00484 | NM_182678    | MRPS5    |
| 8053763 | 1,12 | 2,18 | 0,00390 | 1,74  | 3,33  | 0,00567 | NM_031902    | CPT2     |
| 7901549 | 1,12 | 2,18 | 0,01490 | 1,64  | 3,12  | 0,01413 | NM_000098    | ICK      |
| 8127109 | 1,12 | 2,18 | 0,02841 | 2,34  | 5,08  | 0,00788 | NM_016513    | GLI2     |
| 8044933 | 1,12 | 2,18 | 0,05989 | 0,75  | 1,68  | 0,01792 | NM_005270    | SMYD5    |
| 8042705 | 1,12 | 2,18 | 0,02264 | 2,72  | 6,57  | 0,00054 | NM_006062    | DGAT1    |
| 8153684 | 1,12 | 2,18 | 0,09428 | 2,77  | 6,83  | 0,00191 | NM_012079    | DGAT1    |
| 8153939 | 1,12 | 2,18 | 0,09428 | 2,77  | 6,83  | 0,00191 | NM_012079    | ZNF763   |
| 8025978 | 1,12 | 2,18 | 0,25554 | -0,54 | -1,45 | 0,05088 | NM_001012753 | CTS2     |
| 8067279 | 1,12 | 2,18 | 0,00019 | 1,11  | 2,15  | 0,07384 | NM_001336    | HERC6    |
| 8096335 | 1,12 | 2,18 | 0,13914 | 2,55  | 5,85  | 0,00071 | NM_017912    | RBM14    |
| 7941694 | 1,12 | 2,18 | 0,03516 | 1,62  | 3,08  | 0,00554 | NM_006328    | TIMM10   |
| 7948267 | 1,12 | 2,17 | 0,05064 | 2,67  | 6,38  | 0,00166 | NM_012456    | PID1     |
| 8059565 | 1,12 | 2,17 | 0,03493 | -0,74 | -1,68 | 0,02363 | NM_017933    | MTR      |
| 7910752 | 1,12 | 2,17 | 0,00143 | 1,95  | 3,87  | 0,00261 | NM_000254    | GTF3C3   |
| 8057933 | 1,12 | 2,17 | 0,09919 | 3,16  | 8,93  | 0,00309 | NM_012086    | ST3GAL3  |
| 7900857 | 1,12 | 2,17 | 0,02290 | 1,63  | 3,09  | 0,00205 | NM_174963    | SLC11A2  |
| 7963212 | 1,12 | 2,17 | 0,07465 | 3,31  | 9,94  | 0,00104 | NM_001174126 | AMAC1    |
| 8014230 | 1,12 | 2,17 | 0,07451 | -1,02 | -2,03 | 0,15906 | NM_152462    | MGC72080 |
| 8082248 | 1,12 | 2,17 | 0,42443 | 0,90  | 1,87  | 0,35217 | NR_002822    | PSPH     |
| 8137464 | 1,12 | 2,17 | 0,07842 | 3,56  | 11,81 | 0,00067 | NM_004577    | WBP5     |
| 8169022 | 1,12 | 2,17 | 0,04742 | -0,34 | -1,27 | 0,18536 | NM_016303    | GUSBP3   |
| 8112491 | 1,12 | 2,17 | 0,01359 | 2,48  | 5,60  | 0,00104 | NR_027386    | PAPPA    |
| 8163672 | 1,12 | 2,17 | 0,14282 | -0,57 | -1,49 | 0,04914 | NM_002581    | FKBP4    |
| 7953100 | 1,12 | 2,17 | 0,10473 | 1,94  | 3,83  | 0,05958 | NM_002014    | STAG1    |
| 8090898 | 1,12 | 2,17 | 0,13326 | 1,13  | 2,19  | 0,02349 | NM_005862    | SCD      |
| 7935776 | 1,12 | 2,17 | 0,11378 | 0,16  | 1,12  | 0,74478 | NM_005063    | SCAP     |
| 8086754 | 1,12 | 2,17 | 0,09437 | 1,45  | 2,74  | 0,04154 | NM_012235    | SFRS13A  |
| 8039947 | 1,11 | 2,17 | 0,02400 | 1,31  | 2,48  | 0,00115 | NM_006625    | UTP23    |
| 8147994 | 1,11 | 2,16 | 0,13491 | 2,55  | 5,86  | 0,00071 | NM_032334    | UBE2D3   |
| 8102024 | 1,11 | 2,16 | 0,08889 | 2,21  | 4,63  | 0,00450 | NM_181886    | CFDP1    |
| 8002865 | 1,11 | 2,16 | 0,09991 | 0,98  | 1,97  | 0,03271 | NM_006324    | CRKL     |
| 8071434 | 1,11 | 2,16 | 0,00525 | 3,11  | 8,65  | 0,00247 | NM_005207    | PDK1     |

|         |      |      |         |       |       |         |              |          |
|---------|------|------|---------|-------|-------|---------|--------------|----------|
| 8046408 | 1,11 | 2,16 | 0,03298 | 2,08  | 4,24  | 0,00051 | NM_002610    | ---      |
| 7942520 | 1,11 | 2,16 | 0,03524 | 1,08  | 2,12  | 0,01230 | ---          | TRNT1    |
| 8077353 | 1,11 | 2,16 | 0,02124 | 0,89  | 1,86  | 0,09191 | NM_182916    | SYNJ1    |
| 8070010 | 1,11 | 2,16 | 0,03253 | 1,41  | 2,65  | 0,00137 | NM_003895    | NFU1     |
| 8052784 | 1,11 | 2,16 | 0,02136 | 0,52  | 1,43  | 0,06960 | NM_015700    | LONRF1   |
| 8149399 | 1,11 | 2,16 | 0,00841 | 1,60  | 3,03  | 0,00703 | NM_152271    | ZNF788   |
| 8025992 | 1,11 | 2,16 | 0,01458 | -0,62 | -1,54 | 0,27103 | NR_027049    | H2AFV    |
| 8139421 | 1,11 | 2,16 | 0,13877 | 3,22  | 9,31  | 0,00031 | NM_012412    | NOP58    |
| 8047518 | 1,11 | 2,16 | 0,01719 | 3,03  | 8,20  | 0,00012 | NM_015934    | DHX57    |
| 8051637 | 1,11 | 2,16 | 0,05176 | 0,73  | 1,66  | 0,13764 | NM_198963    | CUL4A    |
| 7970262 | 1,11 | 2,16 | 0,04576 | 2,48  | 5,56  | 0,00003 | NM_001008895 | ANKRD10  |
| 7972828 | 1,11 | 2,15 | 0,01495 | 2,09  | 4,26  | 0,00008 | NM_017664    | CLGN     |
| 8102877 | 1,11 | 2,15 | 0,01710 | 1,67  | 3,19  | 0,00960 | NM_004362    | GTF3C2   |
| 8051075 | 1,11 | 2,15 | 0,12507 | 3,60  | 12,09 | 0,00103 | NM_001521    | NPIP     |
| 7999769 | 1,11 | 2,15 | 0,22296 | 1,67  | 3,17  | 0,00014 | NM_006985    | SLC25A43 |
| 8169624 | 1,11 | 2,15 | 0,02563 | 0,90  | 1,87  | 0,06271 | NM_145305    | C9orf85  |
| 8155794 | 1,11 | 2,15 | 0,23819 | 1,94  | 3,83  | 0,01706 | NM_182505    | ZNF702P  |
| 8039025 | 1,11 | 2,15 | 0,06183 | 0,29  | 1,22  | 0,04922 | NR_003578    | NUP188   |
| 8158446 | 1,11 | 2,15 | 0,16437 | 3,59  | 12,05 | 0,00010 | NM_015354    | CHERP    |
| 8035156 | 1,11 | 2,15 | 0,06404 | 1,74  | 3,34  | 0,00084 | NM_006387    | TAF1     |
| 8168303 | 1,11 | 2,15 | 0,05356 | 1,61  | 3,06  | 0,04024 | NM_004606    | JMJD8    |
| 7998267 | 1,11 | 2,15 | 0,03423 | 2,43  | 5,38  | 0,01503 | NM_001005920 | TRAF5    |
| 7909545 | 1,11 | 2,15 | 0,02800 | 1,63  | 3,09  | 0,00351 | NM_145759    | STRN3    |
| 7978428 | 1,10 | 2,15 | 0,15014 | 2,23  | 4,68  | 0,00471 | NM_001083893 | RPS15    |
| 8024299 | 1,10 | 2,15 | 0,23753 | 3,13  | 8,73  | 0,04385 | NM_001018    | KCTD13   |
| 8000738 | 1,10 | 2,15 | 0,11873 | 3,38  | 10,43 | 0,00147 | NM_178863    | OTUD1    |
| 7926677 | 1,10 | 2,15 | 0,12804 | 3,21  | 9,23  | 0,00124 | NM_001145373 | CIB1     |
| 7991386 | 1,10 | 2,15 | 0,12301 | 1,94  | 3,84  | 0,00322 | NM_006384    | GCLM     |
| 7917779 | 1,10 | 2,15 | 0,03557 | 1,09  | 2,12  | 0,01062 | NM_002061    | SH3RF1   |
| 8103630 | 1,10 | 2,15 | 0,02035 | 1,28  | 2,43  | 0,00275 | NM_020870    | KCTD14   |
| 7950641 | 1,10 | 2,15 | 0,08421 | 2,20  | 4,60  | 0,00079 | NM_023930    | IKBIP    |
| 7965681 | 1,10 | 2,15 | 0,07214 | 0,26  | 1,20  | 0,45645 | NM_153687    | MED27    |
| 8164698 | 1,10 | 2,15 | 0,24647 | 0,55  | 1,46  | 0,28833 | NM_004269    | EIF3F    |
| 7938263 | 1,10 | 2,14 | 0,17814 | 0,65  | 1,57  | 0,35730 | NM_003754    | NET1     |
| 7925954 | 1,10 | 2,14 | 0,09091 | 2,62  | 6,16  | 0,00025 | NM_001047160 | CENPV    |
| 8013015 | 1,10 | 2,14 | 0,07152 | 2,13  | 4,39  | 0,00238 | NM_181716    | RNGTT    |
| 8128052 | 1,10 | 2,14 | 0,03344 | 2,76  | 6,76  | 0,00072 | NM_003800    | DCTN1    |
| 8053107 | 1,10 | 2,14 | 0,02233 | 1,99  | 3,96  | 0,00022 | NM_004082    | RTKN     |
| 8053142 | 1,10 | 2,14 | 0,01724 | 3,09  | 8,49  | 0,00001 | NM_033046    | EHD2     |
| 8029950 | 1,10 | 2,14 | 0,02924 | 0,57  | 1,49  | 0,30868 | NM_014601    | GAS6     |
| 7970329 | 1,10 | 2,14 | 0,07844 | -1,06 | -2,08 | 0,01550 | NM_000820    | ZNF384   |
| 7960666 | 1,10 | 2,14 | 0,00792 | 1,75  | 3,36  | 0,00992 | NM_133476    | FAM185A  |
| 8135211 | 1,10 | 2,14 | 0,23305 | 2,83  | 7,09  | 0,00803 | NR_026879    | KLHL7    |
| 8131815 | 1,10 | 2,14 | 0,03056 | 2,10  | 4,29  | 0,00169 | NR_033328    | TECR     |
| 8026341 | 1,09 | 2,14 | 0,06271 | 2,60  | 6,05  | 0,00079 | NM_138501    | DHFR     |
| 8022640 | 1,09 | 2,14 | 0,18630 | 2,42  | 5,34  | 0,00288 | NM_000791    | C14orf45 |
| 7975676 | 1,09 | 2,14 | 0,04481 | 0,08  | 1,05  | 0,61770 | NM_025057    | DCTN3    |
| 8160839 | 1,09 | 2,13 | 0,20595 | 2,62  | 6,13  | 0,00548 | NM_024348    | OLA1     |
| 8056812 | 1,09 | 2,13 | 0,17363 | 1,32  | 2,50  | 0,00540 | NM_013341    | OGDH     |
| 8132592 | 1,09 | 2,13 | 0,10447 | 3,12  | 8,67  | 0,00261 | NM_002541    | ZW10     |
| 7951734 | 1,09 | 2,13 | 0,09528 | 1,57  | 2,98  | 0,00773 | NM_004724    | ZBTB37   |
| 7907486 | 1,09 | 2,13 | 0,03482 | 2,00  | 4,01  | 0,01470 | NM_032522    | DHFR     |
| 8112902 | 1,09 | 2,13 | 0,09640 | 2,18  | 4,54  | 0,00381 | NM_000791    | SH3KBP1  |
| 8165674 | 1,09 | 2,13 | 0,27510 | -1,73 | -3,32 | 0,00525 | AY423734     | MALT1    |
| 8021418 | 1,09 | 2,13 | 0,18178 | 2,13  | 4,39  | 0,01013 | NM_006785    | C2orf34  |
| 8041745 | 1,09 | 2,13 | 0,08356 | 3,32  | 9,99  | 0,00015 | NM_024766    | ADAMTS9  |
| 8088560 | 1,09 | 2,13 | 0,06023 | -0,88 | -1,84 | 0,01288 | NM_182920    | KIAA0146 |
| 8146336 | 1,09 | 2,13 | 0,09585 | 2,04  | 4,11  | 0,00014 | AK301677     | MTERF    |
| 8140859 | 1,09 | 2,13 | 0,05143 | 0,91  | 1,88  | 0,07407 | NM_006980    | LYN      |
| 8146500 | 1,09 | 2,13 | 0,11560 | 2,86  | 7,27  | 0,00131 | NM_002350    | SLC31A2  |
| 8157264 | 1,09 | 2,13 | 0,09893 | 1,70  | 3,25  | 0,00442 | NM_001860    | DLGAP5   |
| 7979307 | 1,09 | 2,12 | 0,02094 | 2,79  | 6,93  | 0,00063 | NM_014750    | RECQL    |
| 7961654 | 1,09 | 2,12 | 0,14467 | 0,54  | 1,45  | 0,25322 | NM_002907    | RBM23    |
| 7977803 | 1,09 | 2,12 | 0,01340 | 2,69  | 6,44  | 0,00204 | NM_001077351 | ZFP37    |
| 8163444 | 1,09 | 2,12 | 0,00503 | 1,28  | 2,43  | 0,06890 | NM_003408    | C5orf62  |
| 8109326 | 1,09 | 2,12 | 0,06082 | -0,58 | -1,50 | 0,14877 | NM_032947    | PBX2     |
| 8083221 | 1,09 | 2,12 | 0,00388 | 2,27  | 4,83  | 0,00119 | NM_002586    | PRKG1    |
| 7927606 | 1,09 | 2,12 | 0,11214 | -0,95 | -1,93 | 0,00288 | NM_001098512 | CALCOCO1 |
| 7963721 | 1,09 | 2,12 | 0,01621 | 1,59  | 3,02  | 0,00900 | NM_020898    | FBXO25   |
| 8144239 | 1,09 | 2,12 | 0,05189 | 0,37  | 1,29  | 0,41136 | NM_183421    | ABLIM3   |
| 8109093 | 1,08 | 2,12 | 0,10159 | 1,45  | 2,73  | 0,00143 | NM_014945    | ---      |
| 7904569 | 1,08 | 2,12 | 0,58467 | -0,54 | -1,45 | 0,02514 | ---          | PPP4C    |
| 7994756 | 1,08 | 2,12 | 0,03214 | 2,87  | 7,29  | 0,00321 | NM_002720    | KIAA1328 |

|         |      |      |         |       |       |         |                 |           |
|---------|------|------|---------|-------|-------|---------|-----------------|-----------|
| 8091550 | 1,08 | 2,12 | 0,05046 | 1,93  | 3,82  | 0,03109 | NM_020776       | SAP30BP   |
| 8009932 | 1,08 | 2,12 | 0,01825 | 1,02  | 2,03  | 0,02372 | NM_013260       | SFRS12    |
| 8105714 | 1,08 | 2,12 | 0,02156 | 0,86  | 1,81  | 0,01659 | NM_139168       | GTF2E2    |
| 8150103 | 1,08 | 2,12 | 0,14093 | 2,59  | 6,04  | 0,00300 | NM_002095       | DCAF4     |
| 7975506 | 1,08 | 2,11 | 0,05223 | 0,77  | 1,71  | 0,01202 | NM_015604       | HTT       |
| 8093685 | 1,08 | 2,11 | 0,06218 | 2,67  | 6,35  | 0,00372 | NM_002111       | PPP3CC    |
| 8145136 | 1,08 | 2,11 | 0,01126 | 1,97  | 3,92  | 0,00781 | NM_005605       | C20orf69  |
| 8123520 | 1,08 | 2,11 | 0,18285 | 1,62  | 3,08  | 0,04226 | BC118988 KGFLP2 |           |
| 8161362 | 1,08 | 2,11 | 0,04585 | 0,23  | 1,17  | 0,32363 | NR_003670       | SNRPB     |
| 8064502 | 1,08 | 2,11 | 0,02444 | 2,94  | 7,66  | 0,00126 | NM_003091       | FLNB      |
| 8080714 | 1,08 | 2,11 | 0,02279 | 2,75  | 6,74  | 0,02699 | NM_001164317    | C6orf204  |
| 8129193 | 1,08 | 2,11 | 0,01206 | -0,11 | -1,08 | 0,44735 | NM_001178035    | PHF2      |
| 8156476 | 1,08 | 2,11 | 0,04537 | 2,94  | 7,67  | 0,00091 | NM_005392       | CHI3L2    |
| 7903920 | 1,08 | 2,11 | 0,00078 | -0,63 | -1,55 | 0,00292 | NM_001025199    | FGF2      |
| 8097256 | 1,08 | 2,11 | 0,06748 | 0,45  | 1,37  | 0,33718 | NM_002006       | CSRP2     |
| 7965090 | 1,08 | 2,11 | 0,59362 | -0,85 | -1,80 | 0,37470 | NM_001321       | ATP8B2    |
| 7905754 | 1,08 | 2,11 | 0,00430 | 1,19  | 2,28  | 0,02456 | NM_020452       | PPID      |
| 8103437 | 1,08 | 2,11 | 0,04403 | 0,59  | 1,51  | 0,07726 | NM_005038       | CAMK1     |
| 8085206 | 1,08 | 2,11 | 0,03374 | 0,50  | 1,42  | 0,37775 | NM_003656       | CCDC104   |
| 8042066 | 1,08 | 2,11 | 0,00881 | 0,91  | 1,88  | 0,06068 | NM_080667       | MMP16     |
| 8151686 | 1,08 | 2,11 | 0,02572 | -1,31 | -2,47 | 0,01138 | NM_005941       | GLTP      |
| 7966259 | 1,08 | 2,11 | 0,02696 | 0,78  | 1,72  | 0,04672 | NM_016433       | SPOCK3    |
| 8103544 | 1,08 | 2,11 | 0,01059 | -0,70 | -1,63 | 0,00546 | NM_001040159    | DMTF1     |
| 8133914 | 1,08 | 2,11 | 0,00262 | 1,96  | 3,89  | 0,00456 | NR_024549       | VTN       |
| 8013606 | 1,08 | 2,11 | 0,14415 | -1,85 | -3,60 | 0,00037 | NM_000638       | DNAJB11   |
| 8084634 | 1,08 | 2,11 | 0,03155 | 2,30  | 4,93  | 0,00318 | NM_016306       | INSIG1    |
| 8137526 | 1,07 | 2,11 | 0,12413 | 0,74  | 1,67  | 0,02043 | NM_005542       | NBPF16    |
| 7904874 | 1,07 | 2,11 | 0,56524 | -0,25 | -1,19 | 0,32577 | NM_001102663    | PPIE      |
| 7900354 | 1,07 | 2,11 | 0,04977 | 0,98  | 1,97  | 0,02877 | NM_006112       | UBR7      |
| 7976336 | 1,07 | 2,11 | 0,00397 | 2,28  | 4,84  | 0,00232 | NM_175748       | CHID1     |
| 7945579 | 1,07 | 2,11 | 0,13281 | 1,85  | 3,60  | 0,01354 | NM_001142674    | GTF2H2D   |
| 8177674 | 1,07 | 2,10 | 0,00053 | 1,80  | 3,47  | 0,00246 | NM_001042490    | C17orf53  |
| 8007569 | 1,07 | 2,10 | 0,02378 | 2,63  | 6,21  | 0,00349 | NM_024032       | NAIP      |
| 8112478 | 1,07 | 2,10 | 0,01188 | 1,66  | 3,16  | 0,00650 | NM_004536       | TSNAX     |
| 7910550 | 1,07 | 2,10 | 0,09196 | 2,13  | 4,38  | 0,00599 | NM_005999       | CCDC102B  |
| 8021685 | 1,07 | 2,10 | 0,03455 | -0,73 | -1,66 | 0,04943 | NM_001093729    | BAZ1B     |
| 8140037 | 1,07 | 2,10 | 0,02192 | 2,18  | 4,53  | 0,00268 | NM_032408       | GUSBP3    |
| 8105937 | 1,07 | 2,10 | 0,01112 | 2,21  | 4,62  | 0,00093 | BT006760 RNPC3  |           |
| 7903404 | 1,07 | 2,10 | 0,21947 | -0,88 | -1,84 | 0,22777 | NM_017619       | NAALADL2  |
| 8083978 | 1,07 | 2,10 | 0,24951 | -0,27 | -1,21 | 0,37367 | NM_207015       | IL17RA    |
| 8071069 | 1,07 | 2,10 | 0,05784 | 1,89  | 3,69  | 0,00029 | NM_014339       | ATG12     |
| 8113651 | 1,07 | 2,10 | 0,07556 | 1,88  | 3,68  | 0,00387 | NR_033362       | TRRAP     |
| 8134470 | 1,07 | 2,10 | 0,05954 | 2,82  | 7,05  | 0,00033 | NM_003496       | C14orf179 |
| 7975851 | 1,07 | 2,10 | 0,07709 | 1,63  | 3,09  | 0,00727 | NM_001102564    | MED24     |
| 8014925 | 1,07 | 2,10 | 0,03253 | 1,88  | 3,68  | 0,01497 | NM_014815       | PDK4      |
| 8141094 | 1,07 | 2,10 | 0,17376 | 0,89  | 1,85  | 0,06191 | NM_002612       | WDR37     |
| 7925851 | 1,07 | 2,10 | 0,00647 | 1,95  | 3,86  | 0,00025 | NM_014023       | PDCL3     |
| 8043902 | 1,07 | 2,10 | 0,13050 | 2,15  | 4,43  | 0,00772 | NM_024065       | HNRNPF    |
| 7933164 | 1,07 | 2,10 | 0,04514 | 2,41  | 5,32  | 0,00262 | NM_004966       | PGRMC2    |
| 8102745 | 1,07 | 2,10 | 0,01111 | 0,55  | 1,46  | 0,09034 | NM_006320       | DNAJB5    |
| 8154962 | 1,07 | 2,09 | 0,01528 | 2,48  | 5,56  | 0,00216 | NM_001135004    | MBTD1     |
| 8016789 | 1,07 | 2,09 | 0,03873 | 2,13  | 4,37  | 0,00165 | NM_017643       | ZFYVE26   |
| 7979757 | 1,07 | 2,09 | 0,00361 | 2,80  | 6,97  | 0,00026 | NM_015346       | FAM46A    |
| 8127778 | 1,07 | 2,09 | 0,03756 | 0,35  | 1,28  | 0,00676 | NM_017633       | C6orf48   |
| 8178090 | 1,06 | 2,09 | 0,04392 | 5,02  | 32,34 | 0,00111 | NM_001040437    | C6orf48   |
| 8179326 | 1,06 | 2,09 | 0,04392 | 5,02  | 32,34 | 0,00111 | NM_001040437    | PI4KB     |
| 7919950 | 1,06 | 2,09 | 0,07914 | 2,36  | 5,15  | 0,00063 | NM_002651       | ---       |
| 8089038 | 1,06 | 2,09 | 0,26747 | -3,09 | -8,53 | 0,00133 | ---             | ---       |
| 8112914 | 1,06 | 2,09 | 0,26747 | -3,09 | -8,53 | 0,00133 | ---             | MTMR12    |
| 8111339 | 1,06 | 2,09 | 0,07606 | 3,89  | 14,84 | 0,00146 | NM_001040446    | BAG3      |
| 7930921 | 1,06 | 2,09 | 0,08450 | 0,86  | 1,82  | 0,07631 | NM_004281       | PPP2R3A   |
| 8082869 | 1,06 | 2,09 | 0,11819 | 1,86  | 3,63  | 0,00546 | NM_002718       | ELOVL6    |
| 8102342 | 1,06 | 2,09 | 0,10347 | 3,09  | 8,53  | 0,00005 | NM_024090       | ZFX       |
| 8166500 | 1,06 | 2,09 | 0,12272 | 3,30  | 9,84  | 0,00004 | NM_003410       | SLC25A30  |
| 7971388 | 1,06 | 2,09 | 0,15389 | 1,41  | 2,66  | 0,00584 | NM_001010875    | RPL27A    |
| 7938295 | 1,06 | 2,09 | 0,01064 | 0,80  | 1,74  | 0,08840 | NM_000990       | ANKRD42   |
| 7942858 | 1,06 | 2,09 | 0,01721 | 0,66  | 1,58  | 0,02030 | NM_182603       | CENPK     |
| 8112376 | 1,06 | 2,09 | 0,05517 | 4,20  | 18,37 | 0,00006 | NM_022145       | ZNF585B   |
| 8036389 | 1,06 | 2,09 | 0,07645 | 3,09  | 8,50  | 0,00043 | NM_152279       | ---       |
| 7950444 | 1,06 | 2,09 | 0,05466 | -1,60 | -3,02 | 0,01626 | ---             | KIAA0907  |
| 7920852 | 1,06 | 2,09 | 0,00144 | 2,49  | 5,63  | 0,00012 | BC062637 CCNG2  |           |
| 8095870 | 1,06 | 2,09 | 0,01190 | 0,71  | 1,63  | 0,04462 | NM_004354       | SSBP3     |
| 7916403 | 1,06 | 2,09 | 0,10556 | 0,83  | 1,77  | 0,11639 | NM_145716       | MSH6      |

|         |      |      |         |       |       |         |              |           |
|---------|------|------|---------|-------|-------|---------|--------------|-----------|
| 8041888 | 1,06 | 2,09 | 0,03552 | 3,05  | 8,26  | 0,00017 | NM_000179    | MINA      |
| 8089040 | 1,06 | 2,08 | 0,03604 | 2,02  | 4,07  | 0,00173 | NM_001042533 | RNF13     |
| 8083310 | 1,06 | 2,08 | 0,32103 | 3,43  | 10,79 | 0,00003 | NM_007282    | SLC41A3   |
| 8090295 | 1,06 | 2,08 | 0,14206 | 1,92  | 3,77  | 0,01606 | NM_017836    | SEC14L1   |
| 8010139 | 1,06 | 2,08 | 0,08720 | 2,79  | 6,93  | 0,00095 | NM_001143998 | NBPF10    |
| 7904506 | 1,06 | 2,08 | 0,62307 | -0,87 | -1,83 | 0,00787 | NM_001039703 | NBPF3     |
| 7913380 | 1,06 | 2,08 | 0,57354 | -0,88 | -1,85 | 0,01028 | NM_032264    | DHRS1     |
| 7978260 | 1,06 | 2,08 | 0,11877 | 3,33  | 10,04 | 0,00007 | NM_001136050 | LYST      |
| 7925257 | 1,06 | 2,08 | 0,12564 | 0,92  | 1,90  | 0,00563 | NM_000081    | CMIP      |
| 7997427 | 1,06 | 2,08 | 0,10613 | 4,80  | 27,86 | 0,00016 | NM_198390    | BHLHE41   |
| 7961891 | 1,06 | 2,08 | 0,00149 | -1,78 | -3,43 | 0,00010 | NM_030762    | HEXIM1    |
| 8007745 | 1,06 | 2,08 | 0,12099 | 2,32  | 5,00  | 0,00067 | NM_006460    | CDC40     |
| 8121461 | 1,06 | 2,08 | 0,06785 | 2,29  | 4,88  | 0,00064 | NM_015891    | AXL       |
| 8029006 | 1,05 | 2,08 | 0,01304 | 2,91  | 7,51  | 0,00704 | NM_021913    | C15orf40  |
| 7991049 | 1,05 | 2,08 | 0,08611 | 1,87  | 3,66  | 0,00837 | NM_144597    | SLC25A28  |
| 7935639 | 1,05 | 2,08 | 0,22323 | 2,68  | 6,39  | 0,00001 | NM_031212    | GSS       |
| 8065817 | 1,05 | 2,08 | 0,21293 | 3,25  | 9,55  | 0,00123 | NM_000178    | ---       |
| 8085114 | 1,05 | 2,08 | 0,10731 | -2,37 | -5,16 | 0,08934 | ---          | USP6NL    |
| 7932023 | 1,05 | 2,08 | 0,01179 | 3,17  | 8,97  | 0,00002 | NM_014688    | APAF1     |
| 7957759 | 1,05 | 2,08 | 0,05680 | 0,83  | 1,78  | 0,11332 | NM_181861    | RAB27A    |
| 7989023 | 1,05 | 2,08 | 0,00528 | 0,85  | 1,81  | 0,03791 | NM_004580    | GPR133    |
| 7959893 | 1,05 | 2,07 | 0,03860 | -1,19 | -2,28 | 0,05733 | NM_198827    | FBXO36    |
| 8048889 | 1,05 | 2,07 | 0,07779 | 0,86  | 1,82  | 0,08146 | NM_174899    | CHML      |
| 7925500 | 1,05 | 2,07 | 0,08984 | 1,92  | 3,78  | 0,00234 | NM_001821    | 08_Sep    |
| 8114050 | 1,05 | 2,07 | 0,05726 | 2,07  | 4,19  | 0,00043 | NM_015146    | PKIA      |
| 8147012 | 1,05 | 2,07 | 0,02734 | -0,56 | -1,47 | 0,12886 | NM_006823    | ORMDL3    |
| 8014916 | 1,05 | 2,07 | 0,02486 | 0,82  | 1,77  | 0,01868 | NM_139280    | DCAKD     |
| 8016159 | 1,05 | 2,07 | 0,10920 | 3,81  | 14,05 | 0,00001 | NM_024819    | EFNA1     |
| 7905929 | 1,05 | 2,07 | 0,00021 | 3,03  | 8,15  | 0,00205 | NM_004428    | RGS10     |
| 7936673 | 1,05 | 2,07 | 0,15579 | 1,24  | 2,36  | 0,02679 | NM_001005339 | GPHN      |
| 7975167 | 1,05 | 2,07 | 0,05777 | 2,13  | 4,39  | 0,00060 | NM_020806    | RAPGEF2   |
| 8098121 | 1,05 | 2,07 | 0,02545 | 0,47  | 1,39  | 0,14981 | NM_014247    | C14orf153 |
| 7977119 | 1,05 | 2,07 | 0,00020 | 2,08  | 4,22  | 0,00268 | NM_032374    | MIS12     |
| 8004144 | 1,05 | 2,06 | 0,14092 | 1,98  | 3,95  | 0,00212 | NM_024039    | ALG6      |
| 7901915 | 1,05 | 2,06 | 0,09091 | 1,74  | 3,33  | 0,00272 | NM_013339    | GLB1L     |
| 8059158 | 1,05 | 2,06 | 0,00781 | 1,82  | 3,54  | 0,00040 | NM_024506    | U2AF2     |
| 8031536 | 1,04 | 2,06 | 0,04083 | 1,67  | 3,19  | 0,00787 | NM_007279    | MGC72080  |
| 8156319 | 1,04 | 2,06 | 0,37155 | 0,21  | 1,16  | 0,73951 | NR_002822    | FAM192A   |
| 8001537 | 1,04 | 2,06 | 0,02012 | 1,62  | 3,08  | 0,01052 | NM_024946    | GTF3C4    |
| 8158918 | 1,04 | 2,06 | 0,03285 | 1,97  | 3,93  | 0,00148 | NM_012204    | SECTM1    |
| 8019486 | 1,04 | 2,06 | 0,02441 | 1,14  | 2,20  | 0,00538 | NM_003004    | ---       |
| 8112959 | 1,04 | 2,06 | 0,05810 | 1,06  | 2,09  | 0,00488 | ---          | RAB8A     |
| 8026520 | 1,04 | 2,06 | 0,06779 | 1,16  | 2,24  | 0,00581 | NM_005370    | MVP       |
| 7994659 | 1,04 | 2,06 | 0,04630 | 0,29  | 1,22  | 0,55797 | NM_017458    | RPL12     |
| 8125750 | 1,04 | 2,06 | 0,03081 | 1,51  | 2,85  | 0,00134 | NM_000976    | FKBP1A    |
| 8064432 | 1,04 | 2,06 | 0,32651 | 2,23  | 4,69  | 0,01743 | NM_000801    | INTS12    |
| 8102162 | 1,04 | 2,06 | 0,09092 | 1,79  | 3,46  | 0,02161 | NM_020395    | HNRNPAB   |
| 8110450 | 1,04 | 2,06 | 0,00436 | 2,48  | 5,58  | 0,00872 | NM_031266    | YOD1      |
| 7923967 | 1,04 | 2,06 | 0,18083 | 1,36  | 2,58  | 0,02904 | NM_018566    | SNORA20   |
| 8130578 | 1,04 | 2,06 | 0,03208 | -0,69 | -1,61 | 0,00902 | NR_002960    | FAM193A   |
| 8093601 | 1,04 | 2,05 | 0,03210 | 2,06  | 4,18  | 0,00750 | NM_003704    | FBXO21    |
| 7966760 | 1,04 | 2,05 | 0,01490 | 2,54  | 5,83  | 0,00050 | NM_033624    | TMEM194B  |
| 8057736 | 1,04 | 2,05 | 0,08427 | 1,39  | 2,63  | 0,05203 | NM_001142645 | ABHD12    |
| 8065469 | 1,04 | 2,05 | 0,01091 | 0,84  | 1,79  | 0,05637 | NM_001042472 | CYP2U1    |
| 8096744 | 1,04 | 2,05 | 0,07843 | 1,08  | 2,11  | 0,03662 | NM_183075    | USP48     |
| 7913415 | 1,04 | 2,05 | 0,04697 | 2,09  | 4,27  | 0,00166 | NM_032236    | PYGB      |
| 8061447 | 1,04 | 2,05 | 0,06723 | 2,89  | 7,42  | 0,00046 | NM_002862    | BLVRB     |
| 8036913 | 1,04 | 2,05 | 0,17802 | 2,06  | 4,17  | 0,00138 | NM_000713    | MED12     |
| 8168215 | 1,04 | 2,05 | 0,08561 | 2,75  | 6,71  | 0,00047 | NM_005120    | PARP2     |
| 7973036 | 1,04 | 2,05 | 0,14319 | 2,77  | 6,82  | 0,00063 | NM_005484    | BAT2      |
| 8118174 | 1,04 | 2,05 | 0,02885 | 1,74  | 3,33  | 0,00486 | NM_080686    | DDX26B    |
| 8170027 | 1,04 | 2,05 | 0,06117 | 1,96  | 3,90  | 0,00595 | NM_182540    | SCAMP3    |
| 7920725 | 1,03 | 2,05 | 0,07069 | 2,10  | 4,28  | 0,00028 | NM_005698    | SFRS18    |
| 8128394 | 1,03 | 2,05 | 0,02677 | 2,58  | 5,98  | 0,00451 | NM_032870    | NTN4      |
| 7965573 | 1,03 | 2,05 | 0,14617 | 2,79  | 6,94  | 0,00024 | NM_021229    | SYDE1     |
| 8026407 | 1,03 | 2,05 | 0,09426 | 1,69  | 3,23  | 0,00299 | NM_033025    | RBM7      |
| 7944006 | 1,03 | 2,05 | 0,04289 | 1,49  | 2,81  | 0,02548 | NM_016090    | SLC03A1   |
| 7986214 | 1,03 | 2,05 | 0,09267 | -0,99 | -1,98 | 0,00230 | NM_013272    | IFI35     |
| 8007446 | 1,03 | 2,05 | 0,00271 | 0,60  | 1,51  | 0,04569 | NM_005533    | POMT2     |
| 7980358 | 1,03 | 2,05 | 0,03039 | 3,30  | 9,86  | 0,00040 | NM_013382    | ADH1A     |
| 8101874 | 1,03 | 2,04 | 0,05314 | -0,68 | -1,60 | 0,01001 | NM_000667    | SYMPK     |
| 8037695 | 1,03 | 2,04 | 0,07095 | 2,56  | 5,88  | 0,00004 | NM_004819    | YPEL2     |
| 8008819 | 1,03 | 2,04 | 0,07622 | 1,67  | 3,18  | 0,01227 | NM_001005404 | MEIS3P1   |

|         |      |      |         |       |        |         |              |            |
|---------|------|------|---------|-------|--------|---------|--------------|------------|
| 8005695 | 1,03 | 2,04 | 0,06870 | 2,69  | 6,47   | 0,00002 | NR_002211    | UBE2W      |
| 8151401 | 1,03 | 2,04 | 0,14969 | 2,47  | 5,54   | 0,01132 | NM_001001481 | ZNF844     |
| 8025984 | 1,03 | 2,04 | 0,03376 | 0,05  | 1,03   | 0,87410 | NM_001136501 | ATG4A      |
| 8169272 | 1,03 | 2,04 | 0,07546 | 1,56  | 2,95   | 0,00372 | NM_052936    | TM2D1      |
| 7916643 | 1,03 | 2,04 | 0,07436 | 1,59  | 3,02   | 0,02760 | NM_032027    | DHX30      |
| 8079563 | 1,03 | 2,04 | 0,02623 | 1,98  | 3,96   | 0,00008 | NM_138615    | STK3       |
| 8151967 | 1,03 | 2,04 | 0,07332 | 1,18  | 2,27   | 0,01032 | NM_006281    | AMOTL2     |
| 8090852 | 1,03 | 2,04 | 0,04259 | 2,12  | 4,36   | 0,02006 | NM_016201    | KBTBD4     |
| 7947917 | 1,03 | 2,04 | 0,13138 | 1,11  | 2,16   | 0,07899 | NM_016506    | ABLIM1     |
| 7936463 | 1,02 | 2,03 | 0,11293 | 3,23  | 9,40   | 0,00117 | NM_002313    | KLHDC1     |
| 7974214 | 1,02 | 2,03 | 0,09035 | 1,31  | 2,48   | 0,11250 | NM_172193    | CEP135     |
| 8095187 | 1,02 | 2,03 | 0,14109 | 1,68  | 3,21   | 0,01313 | NM_025009    | SYNC       |
| 7914557 | 1,02 | 2,03 | 0,17483 | -0,55 | -1,47  | 0,13918 | NM_030786    | F3         |
| 7917875 | 1,02 | 2,03 | 0,00279 | 0,95  | 1,93   | 0,00487 | NM_001993    | KIF1B      |
| 7897561 | 1,02 | 2,03 | 0,02648 | 2,27  | 4,83   | 0,00066 | NM_015074    | ZNF622     |
| 8111129 | 1,02 | 2,03 | 0,16576 | 1,22  | 2,33   | 0,03162 | NM_033414    | SNRPE      |
| 7908988 | 1,02 | 2,03 | 0,00968 | 0,71  | 1,64   | 0,01227 | NM_003094    | MTHFD1L    |
| 8155563 | 1,02 | 2,03 | 0,02203 | 0,79  | 1,73   | 0,01170 | NM_015440    | GINS2      |
| 8003204 | 1,02 | 2,03 | 0,03899 | 3,05  | 8,30   | 0,00261 | NM_016095    | NDUFAF1    |
| 7987642 | 1,02 | 2,03 | 0,06543 | 2,26  | 4,78   | 0,00172 | NM_016013    | MAX        |
| 7979671 | 1,02 | 2,03 | 0,00356 | 0,71  | 1,63   | 0,10123 | NM_145113    | EIF4EBP1   |
| 8145889 | 1,02 | 2,03 | 0,25072 | 1,88  | 3,69   | 0,00212 | NM_004095    | ZNF548     |
| 8031737 | 1,02 | 2,03 | 0,03639 | -0,52 | -1,43  | 0,02610 | NM_001172773 | ZFP91-CNTF |
| 7940118 | 1,02 | 2,03 | 0,03860 | 0,44  | 1,36   | 0,23579 | NR_024091    | CRLF3      |
| 8014037 | 1,02 | 2,03 | 0,05962 | 2,17  | 4,49   | 0,00130 | NM_015986    | SIAE       |
| 7944867 | 1,02 | 2,03 | 0,55891 | -3,58 | -11,99 | 0,01323 | NM_170601    | SND1       |
| 8135876 | 1,02 | 2,03 | 0,03764 | 1,17  | 2,24   | 0,13316 | NM_014390    | FUT10      |
| 8150165 | 1,02 | 2,02 | 0,02056 | 1,41  | 2,65   | 0,02417 | NM_032664    | ZMYND11    |
| 7925792 | 1,02 | 2,02 | 0,04210 | 2,34  | 5,05   | 0,00182 | NM_006624    | WDR67      |
| 8148158 | 1,02 | 2,02 | 0,10596 | 2,14  | 4,40   | 0,01227 | NM_145647    | CCDC28A    |
| 8122327 | 1,02 | 2,02 | 0,04213 | 1,39  | 2,62   | 0,00307 | NM_015439    | FLJ43681   |
| 7911333 | 1,02 | 2,02 | 0,03648 | 0,26  | 1,20   | 0,60780 | NR_029406    | RPL23AP82  |
| 8069470 | 1,02 | 2,02 | 0,03648 | 0,26  | 1,20   | 0,60780 | NR_026981    | NAA10      |
| 8175924 | 1,02 | 2,02 | 0,01857 | 3,35  | 10,21  | 0,00220 | NM_003491    | CCDC46     |
| 8017736 | 1,02 | 2,02 | 0,04607 | 0,36  | 1,28   | 0,40109 | NM_145036    | NDUFB9     |
| 8148270 | 1,01 | 2,02 | 0,01696 | 2,16  | 4,47   | 0,03572 | NM_005005    | SGOL2      |
| 8047288 | 1,01 | 2,02 | 0,13792 | 1,76  | 3,38   | 0,02819 | NM_152524    | ---        |
| 7922523 | 1,01 | 2,02 | 0,10492 | 2,89  | 7,43   | 0,00081 | ---          | PRKCE      |
| 8041763 | 1,01 | 2,02 | 0,00956 | 2,65  | 6,27   | 0,00007 | NM_005400    | ---        |
| 7915563 | 1,01 | 2,02 | 0,03202 | 1,54  | 2,90   | 0,01770 | ---          | RBM4B      |
| 7949674 | 1,01 | 2,02 | 0,21018 | 2,31  | 4,94   | 0,00896 | NM_031492    | TTC28      |
| 8075142 | 1,01 | 2,02 | 0,06908 | 2,57  | 5,94   | 0,00122 | NM_001145418 | ACER3      |
| 7942679 | 1,01 | 2,02 | 0,20742 | 3,80  | 13,90  | 0,00342 | NM_018367    | ZBED5      |
| 7946635 | 1,01 | 2,02 | 0,03710 | 1,13  | 2,18   | 0,00428 | NM_021211    | ---        |
| 8065254 | 1,01 | 2,02 | 0,05919 | 2,68  | 6,43   | 0,00015 | ---          | TRIP13     |
| 8104234 | 1,01 | 2,02 | 0,06874 | 3,63  | 12,36  | 0,00071 | NM_004237    | SENPA8     |
| 7984626 | 1,01 | 2,02 | 0,07631 | 0,22  | 1,17   | 0,47258 | NM_145204    | ARHGFE9    |
| 8173217 | 1,01 | 2,02 | 0,08716 | 2,27  | 4,82   | 0,00028 | NM_015185    | TRPC4      |
| 7971104 | 1,01 | 2,02 | 0,01644 | -0,77 | -1,71  | 0,01133 | NM_016179    | FEM1C      |
| 8113616 | 1,01 | 2,02 | 0,05880 | 1,63  | 3,09   | 0,00057 | NM_020177    | NAPB       |
| 8065372 | 1,01 | 2,02 | 0,14220 | 1,56  | 2,94   | 0,00267 | NM_022080    | DNAJA2     |
| 8001185 | 1,01 | 2,02 | 0,08395 | 3,08  | 8,47   | 0,00040 | NM_005880    | MRPL19     |
| 8042962 | 1,01 | 2,01 | 0,07491 | 1,10  | 2,15   | 0,00752 | NM_014763    | THAP2      |
| 7957161 | 1,01 | 2,01 | 0,01884 | 0,68  | 1,60   | 0,23767 | NM_031435    | SVIP       |
| 7947147 | 1,01 | 2,01 | 0,19850 | 1,26  | 2,39   | 0,04687 | NM_148893    | ABCC9      |
| 7961710 | 1,01 | 2,01 | 0,19571 | -0,75 | -1,68  | 0,00391 | NM_005691    | ZNF24      |
| 8022882 | 1,01 | 2,01 | 0,30781 | 3,19  | 9,10   | 0,00047 | NM_006965    | COPE       |
| 8035553 | 1,01 | 2,01 | 0,06604 | 1,76  | 3,38   | 0,03308 | NM_007263    | CTDSPL     |
| 8078650 | 1,01 | 2,01 | 0,15717 | 3,23  | 9,35   | 0,00000 | NM_001008392 | XAF1       |
| 8004184 | 1,01 | 2,01 | 0,04608 | -0,93 | -1,91  | 0,00678 | NM_017523    | MAGOHB     |
| 7961208 | 1,01 | 2,01 | 0,15158 | 1,48  | 2,78   | 0,00866 | NM_018048    | IFI44      |
| 7902553 | 1,01 | 2,01 | 0,17806 | -0,74 | -1,67  | 0,03927 | NM_006417    | IL17RD     |
| 8088264 | 1,01 | 2,01 | 0,12933 | 0,94  | 1,92   | 0,00514 | NM_017563    | ZNF460     |
| 8031714 | 1,01 | 2,01 | 0,25229 | 1,79  | 3,46   | 0,00080 | NM_006635    | ALG13      |
| 8169419 | 1,01 | 2,01 | 0,01131 | 0,75  | 1,69   | 0,01344 | NM_001099922 | HNRNPA0    |
| 8114320 | 1,01 | 2,01 | 0,03206 | 2,72  | 6,57   | 0,00494 | NM_006805    | WDR59      |
| 8002802 | 1,01 | 2,01 | 0,02995 | 2,97  | 7,81   | 0,00042 | NM_030581    | GGCX       |
| 8053429 | 1,01 | 2,01 | 0,11069 | 1,92  | 3,80   | 0,00037 | NM_000821    | RPL18A     |
| 8026868 | 1,01 | 2,01 | 0,02316 | 0,87  | 1,83   | 0,00133 | NM_000980    | DNAJC5     |
| 8064208 | 1,01 | 2,01 | 0,08756 | 0,52  | 1,43   | 0,04032 | NM_025219    | TMEM175    |
| 8093413 | 1,01 | 2,01 | 0,11044 | 0,83  | 1,77   | 0,07090 | NM_032326    | DDX20      |
| 7904000 | 1,01 | 2,01 | 0,13049 | 1,65  | 3,13   | 0,00558 | NM_007204    | MRPL33     |
| 8041027 | 1,01 | 2,01 | 0,14502 | 1,93  | 3,81   | 0,01441 | NM_004891    | ---        |

|              |      |        |         |       |       |         |                 |                     |
|--------------|------|--------|---------|-------|-------|---------|-----------------|---------------------|
| 7954243      | 1,01 | 2,01   | 0,11096 | 0,11  | 1,08  | 0,67639 | ---             | TUBGCP4             |
| 7983206      | 1,00 | 2,01   | 0,07000 | 4,13  | 17,52 | 0,00082 | NM_014444       | DDB2                |
| 7939738      | 1,00 | 2,01   | 0,02465 | 0,86  | 1,82  | 0,00685 | NM_000107       | RNMT                |
| 8020323      | 1,00 | 2,01   | 0,05271 | 1,66  | 3,16  | 0,01203 | NM_003799       | GMCL1               |
| 8042487      | 1,00 | 2,00   | 0,04305 | 2,32  | 4,99  | 0,01148 | NM_178439       | MRPS18C             |
| 8096109      | 1,00 | 2,00   | 0,12438 | 0,82  | 1,76  | 0,11333 | NM_016067       | AKAP1               |
| 8008664      | 1,00 | 2,00   | 0,08485 | 3,35  | 10,17 | 0,00001 | NM_003488       | RAP1GDS1            |
| 8096538      | 1,00 | 2,00   | 0,07935 | 2,17  | 4,49  | 0,00041 | NM_001100426    | CYFIP1              |
| 7981824      | 1,00 | 2,00   | 0,03486 | 1,10  | 2,15  | 0,01219 | NM_014608       | GALK2               |
| 7983616      | 1,00 | 2,00   | 0,03655 | 2,96  | 7,79  | 0,00007 | NM_001001556    | LUC7L2              |
| 8136539      | 1,00 | 2,00   | 0,09015 | 2,58  | 5,97  | 0,00496 | NM_016019       | CTNNBIP1            |
| 7912283      | 1,00 | 2,00   | 0,13611 | 1,57  | 2,98  | 0,00227 | NM_020248       | SEN2                |
| 8084607      | 1,00 | 2,00   | 0,07387 | 2,48  | 5,57  | 0,00006 | NM_021627       | SLC7A5              |
| 8003298      | 1,00 | 2,00   | 0,12729 | 3,74  | 13,36 | 0,00026 | NM_003486       | LRRC37A2            |
| 8007867      | 1,00 | 2,00   | 0,00391 | 2,66  | 6,31  | 0,00007 | NM_001006607    | AKR1C1              |
| 7925918      | 1,00 | 2,00   | 0,17531 | -0,20 | -1,15 | 0,80630 | NM_001353       | MTO1                |
| 8120698      | 1,00 | 2,00   | 0,05306 | 1,68  | 3,20  | 0,00031 | NM_133645       | SLC20A2             |
| 8150537      | 1,00 | 2,00   | 0,00851 | 1,87  | 3,65  | 0,00394 | NM_006749       | UBE2S               |
| 8039491      | 1,00 | 2,00   | 0,01458 | 1,26  | 2,39  | 0,00605 | NM_014501       | COX17               |
| 7968972      | 1,00 | 2,00   | 0,03220 | 0,36  | 1,28  | 0,28585 | NM_005694       | LIMK1               |
| 8133413      | 1,00 | 2,00   | 0,03267 | 1,76  | 3,40  | 0,01678 | NM_002314       | ZNF611              |
| 8038981      | 1,00 | 2,00   | 0,00609 | 0,35  | 1,28  | 0,03005 | NM_030972       | GALM                |
| 8041542      | 1,00 | 2,00   | 0,11549 | 2,62  | 6,15  | 0,00069 | NM_138801       | KRT18               |
| 7955637      | 1,00 | 2,00   | 0,38744 | 3,01  | 8,06  | 0,01046 | NM_199187       | FBXW8               |
| 7959039      | 1,00 | 2,00   | 0,08981 | 1,67  | 3,18  | 0,00133 | NM_153348       | PER3                |
| 7897378      | 1,00 | 2,00   | 0,06192 | 0,29  | 1,23  | 0,22677 | NM_016831       | BDNF                |
| 7947230      | 1,00 | 2,00   | 0,12554 | 0,74  | 1,67  | 0,07049 | NM_170732       | ---                 |
| 8131867      | 1,00 | 2,00   | 0,32268 | 1,16  | 2,23  | 0,24326 | ---             | ALOX5AP             |
| 7968344      | 1,00 | 2,00   | 0,17721 | 2,90  | 7,49  | 0,00636 | NM_001629       | B3GALNT2            |
| 7925229      | 1,00 | 2,00   | 0,01344 | 3,67  | 12,71 | 0,00008 | NM_152490       | CDON                |
| 7952526      | 1,00 | 2,00   | 0,04410 | 2,64  | 6,24  | 0,00003 | NM_016952       | C13orf27            |
| 7972674      | 1,00 | 2,00   | 0,11989 | 2,05  | 4,13  | 0,00234 | NM_138779       | C20orf3             |
| 8065433      | 1,00 | 2,00   | 0,06570 | 1,53  | 2,89  | 0,00255 | NM_020531       | GLIPR2              |
| 8155192      | 1,00 | 1,99   | 0,24298 | 0,48  | 1,39  | 0,02617 | NM_022343       | TRIP10              |
| 8025058      | 1,00 | 1,99   | 0,06113 | 3,51  | 11,43 | 0,00066 | NM_004240       | LPIN2               |
| 8022022      | 1,00 | 1,99   | 0,09213 | 0,99  | 1,98  | 0,03623 | NM_014646       | ZSWIM1              |
| 8063074      | 1,00 | 1,99   | 0,04674 | 1,48  | 2,79  | 0,02518 | NM_080603       | C1orf163            |
| 7916219      | 1,00 | 1,99   | 0,20266 | 3,07  | 8,40  | 0,00012 | NM_023077       | INTS8               |
| 8147396      | 1,00 | 1,99   | 0,03627 | 3,03  | 8,17  | 0,00026 | NM_017864       | SETDB1              |
| 7905258      | 1,00 | 1,99   | 0,12185 | 2,25  | 4,76  | 0,00049 | NM_001145415    | MCCC1               |
| 8092328      | 1,00 | 1,99   | 0,01616 | 1,59  | 3,01  | 0,00255 | NM_020166       | ZNF134              |
| 8031784      | 1,00 | 1,99   | 0,24205 | 2,44  | 5,43  | 0,00201 | NM_003435       | STEAP4              |
| 8140840      | 0,99 | 1,99   | 0,19480 | 0,92  | 1,89  | 0,29530 | NM_024636       | GGA2                |
| 8000284      | 0,99 | 1,99   | 0,15043 | 2,07  | 4,19  | 0,00109 | NM_015044       | PIK3R3              |
| 7915787      | 0,99 | 1,99   | 0,10114 | 1,51  | 2,85  | 0,03180 | NM_003629       | HNRNPA3             |
| 8046590      | 0,99 | 1,99   | 0,09256 | 1,02  | 2,03  | 0,06677 | NM_194247       | DRG2                |
| 8005313      | 0,99 | 1,99   | 0,04456 | 1,47  | 2,77  | 0,01108 | NM_001388       | GUSBP3              |
| 8177544      | 0,99 | 1,99   | 0,16697 | 2,24  | 4,71  | 0,00179 | NR_027386       | ORC2L               |
| 8058161      | 0,99 | 1,99   | 0,07081 | 2,34  | 5,05  | 0,00183 | NM_006190       | ZER1                |
| 8164464      | 0,99 | 1,99   | 0,00757 | 1,99  | 3,97  | 0,00713 | NM_006336       | TRAF3IP2            |
| 8128939      | 0,99 | 1,99   | 0,01557 | 1,53  | 2,89  | 0,00157 | NR_028338       | ZNF836 // ZNF836 // |
| ZNF836       |      |        |         |       |       |         |                 |                     |
| 8038962      | 0,99 | 1,99   | 0,13076 | 0,79  | 1,73  | 0,10881 | NM_001102657 // | NM_001102657 //     |
| NM_001102657 |      | FTSJD2 |         |       |       |         |                 |                     |
| 8119198      | 0,99 | 1,99   | 0,24956 | 2,36  | 5,14  | 0,00136 | NM_015050       | PCBP1               |
| 8042515      | 0,99 | 1,99   | 0,13211 | 2,24  | 4,72  | 0,00078 | NM_006196       | FAM114A2            |
| 8115375      | 0,99 | 1,99   | 0,07330 | 1,10  | 2,14  | 0,03379 | NM_018691       | NEDD4L              |
| 8021376      | 0,99 | 1,99   | 0,11489 | 3,21  | 9,25  | 0,00006 | NM_001144967    | NHEDC2              |
| 8102050      | 0,99 | 1,99   | 0,10186 | 2,12  | 4,34  | 0,00007 | NM_178833       | TRIM44              |
| 7939368      | 0,99 | 1,99   | 0,14575 | 2,15  | 4,44  | 0,01328 | NM_017583       | ACSL5               |
| 7930498      | 0,99 | 1,99   | 0,02759 | -0,49 | -1,40 | 0,05747 | NM_016234       | SNF8                |
| 8016508      | 0,99 | 1,99   | 0,22164 | 3,33  | 10,06 | 0,00000 | NM_007241       | PHF20L1             |
| 8148358      | 0,99 | 1,99   | 0,12360 | 2,13  | 4,37  | 0,00142 | NM_016018       | ARSB                |
| 8112807      | 0,99 | 1,99   | 0,03243 | 0,53  | 1,45  | 0,00654 | NM_000046       | DPM2                |
| 8164336      | 0,99 | 1,98   | 0,00837 | 2,56  | 5,90  | 0,00060 | NM_003863       | ARL17A              |
| 8016285      | 0,99 | 1,98   | 0,01664 | 1,70  | 3,26  | 0,00780 | NM_001113738    | AES                 |
| 8032576      | 0,99 | 1,98   | 0,01092 | 1,26  | 2,39  | 0,07556 | NM_198969       | PCCA                |
| 7969835      | 0,99 | 1,98   | 0,09727 | 1,81  | 3,50  | 0,00050 | NM_000282       | HLA-F               |
| 8117760      | 0,99 | 1,98   | 0,05216 | 1,91  | 3,75  | 0,00965 | NM_001098479    | ALG10               |
| 7954777      | 0,99 | 1,98   | 0,07445 | 2,47  | 5,55  | 0,00409 | NM_032834       | ZNF826              |
| 8035789      | 0,99 | 1,98   | 0,00543 | 1,89  | 3,71  | 0,04234 | NM_001039884    | RHO                 |
| 7910387      | 0,98 | 1,98   | 0,10487 | 1,32  | 2,49  | 0,10117 | NM_021205       | STX18               |
| 8099121      | 0,98 | 1,98   | 0,10930 | 1,04  | 2,06  | 0,01731 | NM_016930       | CGGBP1              |

|         |      |       |         |       |       |         |                 |                  |
|---------|------|-------|---------|-------|-------|---------|-----------------|------------------|
| 8089000 | 0,98 | 1,98  | 0,08655 | 2,51  | 5,69  | 0,00010 | NM_001008390    | UBA7             |
| 8087485 | 0,98 | 1,98  | 0,05814 | -0,58 | -1,50 | 0,02531 | NM_003335       | C5orf42          |
| 8111584 | 0,98 | 1,97  | 0,02087 | 1,14  | 2,20  | 0,00997 | BC144069 CASP2  |                  |
| 8136869 | 0,98 | 1,97  | 0,01709 | 2,65  | 6,26  | 0,00219 | NM_032982       | CPM              |
| 7964834 | 0,98 | 1,97  | 0,15460 | 4,24  | 18,93 | 0,00016 | NM_001874       | C11orf46         |
| 7939087 | 0,98 | 1,97  | 0,12521 | 2,03  | 4,08  | 0,00177 | BC047775 HINFP  |                  |
| 7944435 | 0,98 | 1,97  | 0,13898 | 2,88  | 7,37  | 0,00169 | NM_015517       | RFC2             |
| 8140151 | 0,98 | 1,97  | 0,08651 | 2,46  | 5,49  | 0,00028 | NM_181471       | HERC2P4          |
| 8001099 | 0,98 | 1,97  | 0,14854 | 1,75  | 3,36  | 0,06412 | NR_002827       | TMEM120B         |
| 7959298 | 0,98 | 1,97  | 0,04685 | 2,76  | 6,76  | 0,01120 | NM_001080825    | CHCHD2           |
| 8139758 | 0,98 | 1,97  | 0,06501 | 0,20  | 1,15  | 0,62132 | NM_016139       | TDG              |
| 7958147 | 0,98 | 1,97  | 0,23579 | 1,32  | 2,49  | 0,05171 | NM_003211       | PPTC7            |
| 7966345 | 0,98 | 1,97  | 0,24255 | 2,63  | 6,17  | 0,00115 | NM_139283       | GSK3A            |
| 8037152 | 0,98 | 1,97  | 0,03425 | 2,49  | 5,61  | 0,00003 | NM_019884       | DLST             |
| 7975747 | 0,98 | 1,97  | 0,19319 | 3,46  | 10,97 | 0,00009 | NM_001933       | PBK              |
| 8149955 | 0,98 | 1,97  | 0,00201 | 2,99  | 7,96  | 0,00541 | NM_018492       | POLR2I           |
| 8036276 | 0,98 | 1,97  | 0,08019 | 2,19  | 4,57  | 0,01443 | NM_006233       | TRIM68           |
| 7945979 | 0,98 | 1,97  | 0,11520 | 2,40  | 5,28  | 0,00001 | NM_018073       | TXNDC9           |
| 8054217 | 0,98 | 1,97  | 0,09242 | 1,27  | 2,42  | 0,06419 | NM_005783       | ATP6V1G2         |
| 8124942 | 0,98 | 1,97  | 0,15684 | 1,29  | 2,45  | 0,01032 | NM_130463       | ATP6V1G2         |
| 8179762 | 0,98 | 1,97  | 0,15684 | 1,29  | 2,45  | 0,01032 | NM_130463       | FIS1             |
| 8141717 | 0,97 | 1,97  | 0,27476 | 1,15  | 2,22  | 0,00867 | NM_016068       | ITPR1            |
| 8077376 | 0,97 | 1,96  | 0,01339 | 0,00  | -1,00 | 0,99387 | NM_001168272    | UBE2NL // UBE2NL |
| 8170298 | 0,97 | 1,96  | 0,00500 | 0,50  | 1,42  | 0,11254 | NM_001012989 // | NM_001012989     |
|         |      | WIPI2 |         |       |       |         |                 |                  |
| 8131303 | 0,97 | 1,96  | 0,01298 | 1,14  | 2,20  | 0,01101 | NM_015610       | HLA-F            |
| 8179019 | 0,97 | 1,96  | 0,08018 | 2,08  | 4,24  | 0,00926 | NM_018950       | DENND1A          |
| 8164034 | 0,97 | 1,96  | 0,04998 | 1,59  | 3,02  | 0,00750 | NM_020946       | STX10            |
| 8034631 | 0,97 | 1,96  | 0,16682 | 1,53  | 2,88  | 0,14474 | NM_003765       | ARAF             |
| 8167165 | 0,97 | 1,96  | 0,10101 | 2,04  | 4,12  | 0,00162 | NM_001654       | SLC35D1          |
| 7916808 | 0,97 | 1,96  | 0,09791 | 1,53  | 2,89  | 0,00063 | NM_015139       | PRDM5            |
| 8102567 | 0,97 | 1,96  | 0,01705 | 0,47  | 1,38  | 0,13839 | NM_018699       | RRM2B            |
| 8152133 | 0,97 | 1,96  | 0,05887 | 1,12  | 2,18  | 0,00261 | NM_015713       | TPK1             |
| 8143643 | 0,97 | 1,96  | 0,18194 | 0,75  | 1,68  | 0,06517 | NM_022445       | TDRD3            |
| 7969341 | 0,97 | 1,96  | 0,00731 | 1,39  | 2,62  | 0,01453 | NM_030794       | THG1L            |
| 8109576 | 0,97 | 1,96  | 0,03085 | 1,82  | 3,53  | 0,00045 | NM_017872       | C2orf18          |
| 8040698 | 0,97 | 1,96  | 0,13555 | 2,59  | 6,01  | 0,00059 | NM_017877       | C7orf11          |
| 8137008 | 0,97 | 1,96  | 0,43952 | -2,66 | -6,32 | 0,00144 | AK290098 ---    |                  |
| 8132290 | 0,97 | 1,96  | 0,26768 | 0,54  | 1,45  | 0,43882 | ---             | ZNF66            |
| 8027268 | 0,97 | 1,96  | 0,00237 | 0,50  | 1,41  | 0,09469 | BC067843 ---    |                  |
| 8081233 | 0,97 | 1,96  | 0,24302 | 0,41  | 1,33  | 0,72472 | ---             | SHC1             |
| 7920600 | 0,97 | 1,96  | 0,07969 | 1,90  | 3,72  | 0,09101 | NM_183001       | TSPAN9           |
| 7953166 | 0,97 | 1,96  | 0,05938 | 1,04  | 2,06  | 0,03044 | NM_006675       | ICT1             |
| 8009727 | 0,97 | 1,96  | 0,07014 | 2,84  | 7,18  | 0,00158 | NM_001545       | CYB5R4           |
| 8120943 | 0,97 | 1,95  | 0,18156 | 1,67  | 3,18  | 0,00102 | NM_016230       | ZNF277           |
| 8135497 | 0,97 | 1,95  | 0,02140 | 1,35  | 2,54  | 0,00774 | NM_021994       | FAM89B           |
| 7941302 | 0,97 | 1,95  | 0,00912 | 2,47  | 5,52  | 0,02083 | NM_001098785    | UNK              |
| 8009995 | 0,97 | 1,95  | 0,01308 | 1,74  | 3,34  | 0,01368 | NM_001080419    | NR2F1            |
| 8106923 | 0,97 | 1,95  | 0,04223 | -0,76 | -1,69 | 0,00105 | NM_005654       | NAP1L5           |
| 8101723 | 0,97 | 1,95  | 0,09868 | -0,14 | -1,10 | 0,56050 | NM_153757       | UST              |
| 8122660 | 0,96 | 1,95  | 0,14796 | -0,30 | -1,23 | 0,27810 | NM_005715       | PNPT1            |
| 8052331 | 0,96 | 1,95  | 0,16020 | 2,55  | 5,87  | 0,00101 | NM_033109       | SMC2             |
| 8156982 | 0,96 | 1,95  | 0,06580 | 2,86  | 7,28  | 0,00018 | NM_001042551    | AP1S1            |
| 8135080 | 0,96 | 1,95  | 0,03545 | 2,54  | 5,83  | 0,00334 | NM_001283       | FYCO1            |
| 8086572 | 0,96 | 1,95  | 0,05177 | 1,13  | 2,19  | 0,02831 | NM_024513       | SERAC1           |
| 8130474 | 0,96 | 1,95  | 0,03595 | 1,93  | 3,82  | 0,00104 | NM_032861       | LNX2             |
| 7970716 | 0,96 | 1,95  | 0,02476 | 3,36  | 10,27 | 0,00047 | NM_153371       | TRAPPC3          |
| 7914887 | 0,96 | 1,95  | 0,20078 | 2,58  | 5,99  | 0,00082 | NM_014408       | GSN              |
| 8157582 | 0,96 | 1,95  | 0,03016 | 0,71  | 1,63  | 0,05713 | NM_000177       | C21orf7          |
| 8068083 | 0,96 | 1,95  | 0,06089 | 1,59  | 3,01  | 0,00271 | NM_020152       | FOXN2            |
| 8041902 | 0,96 | 1,95  | 0,05913 | 0,91  | 1,88  | 0,05296 | NM_002158       | NPHP3            |
| 8090737 | 0,96 | 1,95  | 0,08713 | 0,77  | 1,71  | 0,03827 | NM_153240       | KRT10            |
| 8015104 | 0,96 | 1,94  | 0,01541 | -0,21 | -1,16 | 0,16077 | NM_000421       | CYC1             |
| 8148728 | 0,96 | 1,94  | 0,10676 | 3,72  | 13,21 | 0,00207 | NM_001916       | ODZ3             |
| 8098441 | 0,96 | 1,94  | 0,02224 | -0,98 | -1,97 | 0,00133 | NM_001080477    | MAP3K11          |
| 7949454 | 0,96 | 1,94  | 0,03231 | 1,32  | 2,49  | 0,04375 | NM_002419       | MTA1             |
| 7977373 | 0,96 | 1,94  | 0,04414 | 3,59  | 12,07 | 0,00007 | NM_004689       | HIBCH            |
| 8057719 | 0,96 | 1,94  | 0,04118 | 1,25  | 2,38  | 0,02042 | NM_014362       | PTER             |
| 7926356 | 0,96 | 1,94  | 0,11566 | 2,45  | 5,47  | 0,00666 | NM_001001484    | MOSC1            |
| 7909877 | 0,96 | 1,94  | 0,00205 | 2,44  | 5,43  | 0,00044 | NM_022746       | CCNE2            |
| 8151871 | 0,96 | 1,94  | 0,08067 | 2,59  | 6,02  | 0,00020 | NM_057749       | DUSP14           |
| 8006736 | 0,96 | 1,94  | 0,30406 | 1,97  | 3,92  | 0,01082 | NM_007026       | COX17            |
| 8089795 | 0,96 | 1,94  | 0,02485 | 0,60  | 1,52  | 0,11537 | NM_005694       | FSCN1            |



|                                                     |      |      |         |       |       |         |                                     |                   |
|-----------------------------------------------------|------|------|---------|-------|-------|---------|-------------------------------------|-------------------|
| 8131339                                             | 0,96 | 1,94 | 0,20271 | 2,26  | 4,80  | 0,02991 | NM_003088                           | BUB1              |
| 8054580                                             | 0,96 | 1,94 | 0,03719 | 3,54  | 11,65 | 0,00412 | NM_004336                           | SHPRH             |
| 8130038                                             | 0,96 | 1,94 | 0,06364 | 2,03  | 4,08  | 0,00312 | NM_001042683                        | DOCK5             |
| 8145365                                             | 0,96 | 1,94 | 0,02828 | 3,56  | 11,81 | 0,00013 | NM_024940                           | PTPLA             |
| 7932420                                             | 0,95 | 1,94 | 0,07671 | 1,34  | 2,53  | 0,03219 | NM_014241                           | CNDP2             |
| 8021727                                             | 0,95 | 1,94 | 0,02444 | 1,26  | 2,39  | 0,02282 | NM_018235                           | ZMYM5             |
| 7970428                                             | 0,95 | 1,94 | 0,17982 | 1,11  | 2,16  | 0,02908 | NM_001039650                        | LRRC37A3          |
| 8017688                                             | 0,95 | 1,94 | 0,00832 | 2,64  | 6,25  | 0,00023 | NM_199340                           | NDE1              |
| 7993467                                             | 0,95 | 1,93 | 0,11468 | 1,75  | 3,36  | 0,00046 | NM_001143979                        | NSUN4             |
| 7901219                                             | 0,95 | 1,93 | 0,18200 | 3,06  | 8,34  | 0,00004 | NM_199044                           | CASC3             |
| 8007028                                             | 0,95 | 1,93 | 0,05851 | 3,28  | 9,74  | 0,00085 | NM_007359                           | ACN9              |
| 8134415                                             | 0,95 | 1,93 | 0,00462 | 0,59  | 1,51  | 0,08097 | NM_020186                           | INO80D            |
| 8058415                                             | 0,95 | 1,93 | 0,12895 | 1,70  | 3,25  | 0,01892 | NM_017759                           | ---               |
| 8165669                                             | 0,95 | 1,93 | 0,28025 | -1,79 | -3,45 | 0,00301 | --- MAST2                           | ---               |
| 7901140                                             | 0,95 | 1,93 | 0,02307 | 1,97  | 3,92  | 0,00398 | NM_015112                           | LRRC37A2          |
| 8007850                                             | 0,95 | 1,93 | 0,00960 | 2,59  | 6,02  | 0,00014 | NM_001006607                        | PIGA              |
| 8171418                                             | 0,95 | 1,93 | 0,04554 | 1,73  | 3,31  | 0,02699 | NM_002641                           | TSPAN7            |
| 8166784                                             | 0,95 | 1,93 | 0,02350 | 1,14  | 2,21  | 0,00809 | NM_004615                           | DPP7              |
| 8165438                                             | 0,95 | 1,93 | 0,09720 | 2,11  | 4,32  | 0,00319 | NM_013379                           | ---               |
| 8057613                                             | 0,95 | 1,93 | 0,37495 | -1,00 | -2,00 | 0,45741 | --- ANGPT1                          | ---               |
| 8152297                                             | 0,95 | 1,93 | 0,03997 | -0,97 | -1,96 | 0,02342 | NM_001146                           | C15orf57          |
| 7987526                                             | 0,95 | 1,93 | 0,07946 | 2,24  | 4,74  | 0,00073 | NM_001080791                        | POLD2             |
| 8139299                                             | 0,95 | 1,93 | 0,10208 | 2,70  | 6,48  | 0,00331 | NM_001127218                        | NBPF9             |
| 7904486                                             | 0,94 | 1,92 | 0,66695 | -1,01 | -2,01 | 0,00379 | AK294414 C6orf99                    | ---               |
| 8123101                                             | 0,94 | 1,92 | 0,08309 | -0,66 | -1,58 | 0,28898 | ENST00000367073                     | APH1B             |
| 7984124                                             | 0,94 | 1,92 | 0,25266 | 0,95  | 1,94  | 0,00805 | NM_031301                           | FGF5              |
| 8096050                                             | 0,94 | 1,92 | 0,18502 | -1,84 | -3,57 | 0,00003 | NM_004464                           | RORA              |
| 7989365                                             | 0,94 | 1,92 | 0,00856 | 0,63  | 1,55  | 0,01700 | NM_134260                           | SIL1              |
| 8114476                                             | 0,94 | 1,92 | 0,06734 | 0,47  | 1,38  | 0,17516 | NM_001037633                        | DVL3              |
| 8084323                                             | 0,94 | 1,92 | 0,08713 | 2,16  | 4,48  | 0,01345 | NM_004423                           | SUPT16H           |
| 7977674                                             | 0,94 | 1,92 | 0,14827 | 2,60  | 6,05  | 0,00008 | NM_007192                           | SIAH1             |
| 8001306                                             | 0,94 | 1,92 | 0,01291 | 0,92  | 1,89  | 0,02169 | NM_001006610                        | RGS9              |
| 8009277                                             | 0,94 | 1,92 | 0,03168 | 1,32  | 2,50  | 0,01266 | NM_003835                           | C6orf130          |
| 8126259                                             | 0,94 | 1,92 | 0,19447 | 1,46  | 2,74  | 0,00412 | AJ420538 CRY2                       | ---               |
| 7939595                                             | 0,94 | 1,92 | 0,06155 | 0,10  | 1,08  | 0,78701 | NM_021117                           | TOP2B             |
| 8085815                                             | 0,94 | 1,91 | 0,17792 | 2,37  | 5,17  | 0,00033 | NM_001068                           | PVR               |
| 8029437                                             | 0,94 | 1,91 | 0,00371 | 2,98  | 7,87  | 0,00083 | NM_006505                           | STIM2             |
| 8094501                                             | 0,94 | 1,91 | 0,03032 | 1,01  | 2,01  | 0,02255 | NM_001169118                        | TMC7              |
| 7993588                                             | 0,94 | 1,91 | 0,03523 | 3,14  | 8,82  | 0,00018 | NM_024847                           | ---               |
| 8009513                                             | 0,94 | 1,91 | 0,11451 | -0,18 | -1,14 | 0,77341 | --- LUZP1                           | ---               |
| 7913558                                             | 0,94 | 1,91 | 0,16409 | 1,21  | 2,31  | 0,00199 | NM_033631                           | SCG2              |
| 8059345                                             | 0,94 | 1,91 | 0,24163 | -0,49 | -1,41 | 0,03192 | NM_003469                           | SPRYD4            |
| 7956257                                             | 0,94 | 1,91 | 0,00567 | 1,11  | 2,16  | 0,00482 | NM_207344                           | CLK2P // CLK2P // |
| CLK2P // CLK2P // CLK2P // CLK2P // CLK2P           |      |      |         |       |       |         |                                     |                   |
| 8138596                                             | 0,94 | 1,91 | 0,21966 | 2,66  | 6,31  | 0,00021 | NR_002711 // NR_002711 // NR_002711 |                   |
| // NR_002711 // NR_002711 // NR_002711 // NR_002711 |      |      |         |       |       |         |                                     |                   |
| 7946563                                             | 0,93 | 1,91 | 0,47756 | -2,61 | -6,10 | 0,00256 | --- NFXL1                           | ---               |
| 8100179                                             | 0,93 | 1,91 | 0,08831 | 2,73  | 6,65  | 0,00253 | NM_152995                           | FLVCR1            |
| 7909628                                             | 0,93 | 1,91 | 0,08929 | 3,77  | 13,62 | 0,00063 | NM_014053                           | ZDHHC5            |
| 7940051                                             | 0,93 | 1,91 | 0,15946 | 2,62  | 6,16  | 0,00122 | NM_015457                           | PTRF              |
| 8015635                                             | 0,93 | 1,91 | 0,03075 | 0,90  | 1,86  | 0,07135 | NM_012232                           | FAM151B           |
| 8106626                                             | 0,93 | 1,91 | 0,14485 | 0,28  | 1,21  | 0,32091 | AY358256 MTMR14                     | ---               |
| 8077550                                             | 0,93 | 1,91 | 0,02751 | 1,34  | 2,53  | 0,00301 | NM_001077525                        | ZC3H7B            |
| 8073397                                             | 0,93 | 1,91 | 0,03430 | 1,47  | 2,77  | 0,00460 | NM_017590                           | ZHX2              |
| 8148149                                             | 0,93 | 1,91 | 0,21417 | 2,80  | 6,95  | 0,00001 | NM_014943                           | SNX16             |
| 8151572                                             | 0,93 | 1,91 | 0,29628 | 2,34  | 5,05  | 0,00157 | NM_022133                           | SNRPG             |
| 8026339                                             | 0,93 | 1,91 | 0,05058 | 2,53  | 5,78  | 0,00611 | NM_003096                           | ENOPH1            |
| 8096081                                             | 0,93 | 1,91 | 0,19435 | 1,42  | 2,68  | 0,01090 | NM_021204                           | HERC2P4           |
| 8001067                                             | 0,93 | 1,91 | 0,15073 | 1,68  | 3,22  | 0,02409 | NR_002827                           | NBPF16            |
| 7904999                                             | 0,93 | 1,91 | 0,56038 | -0,29 | -1,22 | 0,37906 | NM_001102663                        | CRYBB2P1          |
| 8072009                                             | 0,93 | 1,91 | 0,19201 | 2,00  | 4,01  | 0,01477 | BC047380 MYNN                       | ---               |
| 8083794                                             | 0,93 | 1,91 | 0,10825 | 1,50  | 2,82  | 0,01954 | NM_018657                           | KIAA0247          |
| 7975361                                             | 0,93 | 1,91 | 0,01317 | 2,50  | 5,67  | 0,00369 | NM_014734                           | SOCS4             |
| 7974447                                             | 0,93 | 1,91 | 0,08688 | 1,98  | 3,96  | 0,00110 | NM_199421                           | ISYNA1            |
| 8035465                                             | 0,93 | 1,91 | 0,10790 | 2,61  | 6,09  | 0,00300 | NM_016368                           | HAGH              |
| 7998604                                             | 0,93 | 1,90 | 0,08208 | 1,63  | 3,09  | 0,00041 | NM_005326                           | SEC22A            |
| 8082153                                             | 0,93 | 1,90 | 0,24216 | 1,14  | 2,21  | 0,00984 | NM_012430                           | CLEC2B            |
| 7961083                                             | 0,93 | 1,90 | 0,15694 | -0,75 | -1,69 | 0,02340 | NM_005127                           | CTCF              |
| 7996593                                             | 0,93 | 1,90 | 0,03066 | 2,09  | 4,27  | 0,00173 | NM_006565                           | C20orf112         |
| 8065612                                             | 0,93 | 1,90 | 0,05804 | 0,81  | 1,76  | 0,00209 | NM_080616                           | HIST1H1E          |
| 8117377                                             | 0,93 | 1,90 | 0,31296 | 2,61  | 6,09  | 0,17456 | NM_005321                           | C19orf62          |
| 8026698                                             | 0,93 | 1,90 | 0,08028 | 1,42  | 2,67  | 0,07051 | NM_001033549                        | LOC220594         |
| 8005689                                             | 0,93 | 1,90 | 0,09286 | 2,38  | 5,19  | 0,00432 | NR_003554                           | CCDC123           |

|         |      |      |         |       |       |         |                 |            |
|---------|------|------|---------|-------|-------|---------|-----------------|------------|
| 8035958 | 0,93 | 1,90 | 0,02166 | 1,13  | 2,19  | 0,00717 | NM_032816       | NPY        |
| 8131919 | 0,93 | 1,90 | 0,08005 | -1,64 | -3,12 | 0,00120 | NM_000905       | CD82       |
| 7939546 | 0,93 | 1,90 | 0,00880 | -0,51 | -1,43 | 0,35278 | NM_002231       | MGAT5      |
| 8045349 | 0,93 | 1,90 | 0,02275 | 1,91  | 3,77  | 0,00090 | NM_002410       | TMEM38B    |
| 8157092 | 0,93 | 1,90 | 0,25792 | 3,22  | 9,32  | 0,00185 | NM_018112       | TP53TG1    |
| 8140739 | 0,93 | 1,90 | 0,21113 | -0,78 | -1,72 | 0,03118 | AB007455 TRMT5  |            |
| 7979516 | 0,92 | 1,90 | 0,11671 | 1,78  | 3,44  | 0,00152 | NM_020810       | TNFRSF12A  |
| 7992789 | 0,92 | 1,90 | 0,35998 | 3,29  | 9,79  | 0,01934 | NM_016639       | FAM120A    |
| 8156452 | 0,92 | 1,90 | 0,01080 | 1,88  | 3,68  | 0,00577 | NM_014612       | HSF2       |
| 8121757 | 0,92 | 1,90 | 0,00520 | 0,57  | 1,48  | 0,00747 | NM_004506       | ---        |
| 8056763 | 0,92 | 1,90 | 0,19250 | 3,59  | 12,04 | 0,00290 | --- ZNF593      |            |
| 7899096 | 0,92 | 1,90 | 0,02355 | 0,86  | 1,82  | 0,21652 | NM_015871       | MXD1       |
| 8042503 | 0,92 | 1,90 | 0,00070 | 2,05  | 4,15  | 0,00324 | NM_002357       | B3GAT3     |
| 7948741 | 0,92 | 1,90 | 0,43066 | 3,92  | 15,13 | 0,00181 | NM_012200       | NCRNA00171 |
| 8178324 | 0,92 | 1,90 | 0,04580 | 0,72  | 1,64  | 0,12288 | AF032109 CPEB1  |            |
| 7990971 | 0,92 | 1,89 | 0,04275 | 0,03  | 1,02  | 0,83543 | NM_030594       | BAT3       |
| 8178526 | 0,92 | 1,89 | 0,04388 | 2,83  | 7,09  | 0,00264 | NM_004639       | BAT3       |
| 8179782 | 0,92 | 1,89 | 0,04388 | 2,83  | 7,09  | 0,00264 | NM_004639       | ZNF639     |
| 8084035 | 0,92 | 1,89 | 0,15204 | 2,21  | 4,64  | 0,00007 | NM_016331       | PINK1      |
| 7898663 | 0,92 | 1,89 | 0,00348 | 1,31  | 2,48  | 0,04017 | NM_032409       | NFATC3     |
| 7996744 | 0,92 | 1,89 | 0,06376 | 3,13  | 8,75  | 0,00008 | NM_173163       | PHF16      |
| 8167013 | 0,92 | 1,89 | 0,03435 | 1,31  | 2,47  | 0,00086 | NM_014735       | SIK2       |
| 7943760 | 0,92 | 1,89 | 0,00108 | 1,47  | 2,78  | 0,01501 | NM_015191       | FLJ16171   |
| 8115871 | 0,92 | 1,89 | 0,38082 | -1,54 | -2,92 | 0,01654 | AK131247 INPP5F |            |
| 7930927 | 0,92 | 1,89 | 0,16070 | 1,72  | 3,30  | 0,00026 | NM_014937       | MANF       |
| 8080084 | 0,92 | 1,89 | 0,01830 | 2,00  | 4,01  | 0,01192 | NM_006010       | ZC3HAV1L   |
| 8143270 | 0,92 | 1,89 | 0,07305 | 2,79  | 6,91  | 0,00010 | NM_080660       | ---        |
| 8112918 | 0,92 | 1,89 | 0,25103 | -2,16 | -4,47 | 0,00348 | --- MLLT1       |            |
| 8033118 | 0,92 | 1,89 | 0,02759 | 0,92  | 1,89  | 0,04050 | NM_005934       | TIMM22     |
| 8003627 | 0,92 | 1,89 | 0,16539 | 2,45  | 5,48  | 0,00486 | NM_013337       | CEP78      |
| 8156026 | 0,92 | 1,89 | 0,04162 | 3,27  | 9,62  | 0,00040 | NM_001098802    | SEPN1      |
| 7899043 | 0,92 | 1,89 | 0,06852 | 2,13  | 4,38  | 0,01797 | NM_020451       | ZC3H13     |
| 7971422 | 0,92 | 1,89 | 0,03970 | 0,36  | 1,28  | 0,17110 | NM_015070       | TMEM67     |
| 8147313 | 0,92 | 1,89 | 0,23035 | 3,19  | 9,15  | 0,00058 | NM_153704       | NFKBIZ     |
| 8081386 | 0,92 | 1,89 | 0,07245 | 0,79  | 1,73  | 0,05404 | NM_031419       | SVIL       |
| 7932796 | 0,92 | 1,89 | 0,01943 | 0,56  | 1,48  | 0,01496 | NM_021738       | HAUS6      |
| 8160284 | 0,91 | 1,89 | 0,20441 | 2,65  | 6,28  | 0,02060 | NM_017645       | ADAMTS3    |
| 8100870 | 0,91 | 1,88 | 0,02752 | -0,53 | -1,45 | 0,22806 | NM_014243       | SLC35B2    |
| 8126658 | 0,91 | 1,88 | 0,16873 | 3,72  | 13,16 | 0,00215 | NM_178148       | ---        |
| 8130495 | 0,91 | 1,88 | 0,14284 | 0,71  | 1,64  | 0,14085 | --- PPIL4       |            |
| 8130087 | 0,91 | 1,88 | 0,02971 | 1,99  | 3,96  | 0,00374 | NM_139126       | FAM20A     |
| 8017867 | 0,91 | 1,88 | 0,09517 | -1,98 | -3,95 | 0,00136 | NM_017565       | ZFYVE1     |
| 7979984 | 0,91 | 1,88 | 0,10626 | 1,33  | 2,52  | 0,01456 | NM_021260       | GSTM5      |
| 7903777 | 0,91 | 1,88 | 0,10374 | -0,14 | -1,10 | 0,15353 | NM_000851       | TMEM63A    |
| 7924636 | 0,91 | 1,88 | 0,09495 | 3,11  | 8,63  | 0,00902 | NM_014698       | NBPF15     |
| 7904976 | 0,91 | 1,88 | 0,56363 | -0,29 | -1,23 | 0,33686 | NM_001170755    | CFL1       |
| 7949496 | 0,91 | 1,88 | 0,10692 | 2,57  | 5,92  | 0,02825 | NM_005507       | TMTC2      |
| 7957417 | 0,91 | 1,88 | 0,24960 | 1,05  | 2,07  | 0,04098 | NM_152588       | IFI44L     |
| 7902541 | 0,91 | 1,88 | 0,13416 | -1,00 | -2,00 | 0,02956 | NM_006820       | KIAA0831   |
| 7979328 | 0,91 | 1,88 | 0,14346 | 2,11  | 4,30  | 0,00038 | NM_014924       | PNPLA4     |
| 8171229 | 0,91 | 1,88 | 0,24327 | 1,53  | 2,89  | 0,01241 | NM_004650       | C17orf85   |
| 8011462 | 0,91 | 1,88 | 0,06732 | 2,18  | 4,54  | 0,00721 | NM_018553       | ---        |
| 8160258 | 0,91 | 1,88 | 0,33911 | 0,39  | 1,31  | 0,18003 | --- GPR108      |            |
| 8033300 | 0,91 | 1,88 | 0,17244 | 3,14  | 8,79  | 0,00022 | NM_001080452    | ARHGAP11B  |
| 7982287 | 0,91 | 1,88 | 0,35521 | 2,55  | 5,86  | 0,00054 | NM_001039841    | BAT2       |
| 8178011 | 0,91 | 1,88 | 0,02571 | 1,58  | 2,98  | 0,00367 | NM_080686       | F8A1       |
| 8170998 | 0,91 | 1,87 | 0,06224 | 1,61  | 3,05  | 0,00488 | NM_012151       | F8A1       |
| 8171029 | 0,91 | 1,87 | 0,06224 | 1,61  | 3,05  | 0,00488 | NM_012151       | ACOX2      |
| 8088397 | 0,91 | 1,87 | 0,14485 | 0,39  | 1,31  | 0,07137 | NM_003500       | NUBP1      |
| 7993185 | 0,91 | 1,87 | 0,18438 | 3,24  | 9,46  | 0,00130 | NM_002484       | UBA5       |
| 8082750 | 0,91 | 1,87 | 0,04558 | 1,79  | 3,46  | 0,00004 | NM_024818       | GNA11      |
| 8024557 | 0,91 | 1,87 | 0,24154 | 2,96  | 7,81  | 0,00087 | NM_002067       | ZNF780B    |
| 8036813 | 0,91 | 1,87 | 0,00441 | 2,00  | 3,99  | 0,00917 | NM_001005851    | ZMIZ1      |
| 7928558 | 0,91 | 1,87 | 0,24838 | 2,25  | 4,77  | 0,00289 | NM_020338       | RALB       |
| 8044919 | 0,90 | 1,87 | 0,09112 | 1,42  | 2,67  | 0,01214 | NM_002881       | GTF2H2     |
| 8105918 | 0,90 | 1,87 | 0,00104 | 1,63  | 3,09  | 0,00515 | NM_001515       | MCCC2      |
| 8106068 | 0,90 | 1,87 | 0,04677 | 3,62  | 12,29 | 0,00016 | NM_022132       | MCCC2      |
| 8177601 | 0,90 | 1,87 | 0,04677 | 3,62  | 12,29 | 0,00016 | NM_022132       | ZKSCAN3    |
| 8117685 | 0,90 | 1,87 | 0,02282 | 0,13  | 1,09  | 0,52773 | NM_024493       | C10orf78   |
| 7930299 | 0,90 | 1,87 | 0,16031 | 0,62  | 1,54  | 0,34103 | NM_145247       | PMM2       |
| 7993148 | 0,90 | 1,87 | 0,04236 | 1,19  | 2,27  | 0,04193 | NM_000303       | NKIRAS1    |
| 8085788 | 0,90 | 1,87 | 0,27102 | 2,70  | 6,49  | 0,00418 | NM_020345       | PHC2       |
| 7914648 | 0,90 | 1,87 | 0,00295 | 0,09  | 1,06  | 0,67595 | NM_198040       | PIGV       |

|         |      |      |         |       |       |         |                 |          |
|---------|------|------|---------|-------|-------|---------|-----------------|----------|
| 7899244 | 0,90 | 1,87 | 0,01793 | 2,91  | 7,50  | 0,00042 | NM_017837       | INPP4B   |
| 8102950 | 0,90 | 1,87 | 0,04530 | 0,32  | 1,25  | 0,09479 | NM_003866       | TACO1    |
| 8009176 | 0,90 | 1,87 | 0,05677 | 1,31  | 2,47  | 0,02389 | NM_016360       | GATAD2A  |
| 8027169 | 0,90 | 1,87 | 0,04321 | 1,38  | 2,60  | 0,02099 | NM_017660       | MCM7     |
| 8141395 | 0,90 | 1,87 | 0,04146 | 3,04  | 8,25  | 0,00040 | NM_005916       | FAM160A1 |
| 8097801 | 0,90 | 1,86 | 0,24453 | 2,70  | 6,51  | 0,00009 | NM_001109977    | AKAP8L   |
| 8035023 | 0,90 | 1,86 | 0,16182 | 2,47  | 5,53  | 0,00024 | NM_014371       | C16orf72 |
| 7993159 | 0,90 | 1,86 | 0,35093 | 1,04  | 2,05  | 0,01610 | NM_014117       | SEMA6A   |
| 8113666 | 0,90 | 1,86 | 0,13031 | -0,09 | -1,06 | 0,62024 | NM_020796       | GLRB     |
| 8098006 | 0,90 | 1,86 | 0,05697 | -0,15 | -1,11 | 0,66529 | NM_000824       | BMP1     |
| 8145055 | 0,90 | 1,86 | 0,01232 | 1,14  | 2,21  | 0,08290 | NM_006129       | CEP76    |
| 8022380 | 0,90 | 1,86 | 0,18676 | 2,18  | 4,54  | 0,00383 | NM_024899       | KIF20B   |
| 7929078 | 0,90 | 1,86 | 0,06267 | 1,33  | 2,51  | 0,02758 | NM_016195       | TST      |
| 8075857 | 0,90 | 1,86 | 0,20413 | 2,36  | 5,12  | 0,00063 | NM_003312       | ZDHHC12  |
| 8164452 | 0,90 | 1,86 | 0,04674 | 3,54  | 11,59 | 0,00195 | NM_032799       | HYOU1    |
| 7952145 | 0,90 | 1,86 | 0,05099 | 2,69  | 6,47  | 0,00286 | NM_006389       | UBQLN4   |
| 7920912 | 0,90 | 1,86 | 0,18677 | 2,28  | 4,87  | 0,00530 | NM_020131       | NBPF15   |
| 7919412 | 0,90 | 1,86 | 0,56665 | -0,32 | -1,25 | 0,29485 | NM_001170755    | TMEM206  |
| 7924150 | 0,90 | 1,86 | 0,03610 | 2,63  | 6,19  | 0,00217 | NM_018252       | ---      |
| 7969559 | 0,90 | 1,86 | 0,08343 | 1,27  | 2,41  | 0,00112 | ---             | AGPAT1   |
| 8125328 | 0,90 | 1,86 | 0,20319 | 2,06  | 4,18  | 0,00180 | NM_006411       | AGPAT1   |
| 8178762 | 0,90 | 1,86 | 0,20319 | 2,06  | 4,18  | 0,00180 | NM_006411       | AGPAT1   |
| 8179958 | 0,90 | 1,86 | 0,20319 | 2,06  | 4,18  | 0,00180 | NM_006411       | RNH1     |
| 7945420 | 0,89 | 1,86 | 0,10410 | 2,06  | 4,18  | 0,00084 | NM_002939       | CDC6     |
| 8007071 | 0,89 | 1,86 | 0,08719 | 2,95  | 7,72  | 0,00088 | NM_001254       | SLFN12L  |
| 8014257 | 0,89 | 1,86 | 0,39104 | -0,45 | -1,37 | 0,48816 | NM_001145027    | XPA      |
| 8162696 | 0,89 | 1,86 | 0,03361 | 0,62  | 1,54  | 0,19445 | NM_000380       | C9orf80  |
| 8163428 | 0,89 | 1,86 | 0,20143 | 1,69  | 3,23  | 0,00044 | NM_021218       | ARMCX1   |
| 8168868 | 0,89 | 1,86 | 0,00939 | -0,01 | -1,01 | 0,93794 | NM_016608       | TUBG2    |
| 8007312 | 0,89 | 1,86 | 0,22257 | 2,70  | 6,52  | 0,00367 | NM_016437       | ZNF484   |
| 8162449 | 0,89 | 1,86 | 0,01325 | 1,21  | 2,31  | 0,00347 | NM_031486       | DEGS1    |
| 7924553 | 0,89 | 1,86 | 0,15998 | 1,69  | 3,24  | 0,04528 | ENST00000415210 | TBC1D4   |
| 7972021 | 0,89 | 1,86 | 0,13918 | 1,30  | 2,46  | 0,02222 | NM_014832       | NBPF10   |
| 7904562 | 0,89 | 1,86 | 0,65733 | -0,91 | -1,88 | 0,00628 | NM_001039703    | C5orf4   |
| 8115397 | 0,89 | 1,86 | 0,11267 | -0,26 | -1,20 | 0,17625 | NM_032385       | STX6     |
| 7922669 | 0,89 | 1,85 | 0,05203 | 2,05  | 4,13  | 0,00376 | NM_005819       | KRT33A   |
| 8015257 | 0,89 | 1,85 | 0,09435 | -1,38 | -2,60 | 0,02732 | NM_004138       | TCTA     |
| 8079746 | 0,89 | 1,85 | 0,00238 | 1,35  | 2,55  | 0,03090 | NM_022171       | WDR76    |
| 7983306 | 0,89 | 1,85 | 0,11382 | 2,07  | 4,19  | 0,03780 | NM_024908       | ---      |
| 8098344 | 0,89 | 1,85 | 0,17109 | -0,50 | -1,42 | 0,03183 | ---             | FAM125B  |
| 8157905 | 0,89 | 1,85 | 0,13742 | 2,00  | 3,99  | 0,00578 | NM_033446       | PDZD8    |
| 7936559 | 0,89 | 1,85 | 0,03577 | 2,08  | 4,23  | 0,00258 | NM_173791       | PTPRG    |
| 8080810 | 0,89 | 1,85 | 0,15420 | 1,38  | 2,61  | 0,00028 | NM_002841       | SNX33    |
| 7985016 | 0,89 | 1,85 | 0,04408 | 1,65  | 3,14  | 0,00624 | NM_153271       | PFKM     |
| 7955078 | 0,89 | 1,85 | 0,05386 | 1,89  | 3,70  | 0,00272 | NM_001166686    | CDK15    |
| 8047467 | 0,89 | 1,85 | 0,17649 | -0,86 | -1,81 | 0,00052 | NM_139158       | RPL13AP5 |
| 7929593 | 0,89 | 1,85 | 0,31458 | 2,00  | 4,01  | 0,01089 | NR_026712       | TRAP1    |
| 7999025 | 0,89 | 1,85 | 0,03839 | 2,84  | 7,17  | 0,00097 | NM_016292       | MTIF3    |
| 7970704 | 0,89 | 1,85 | 0,01387 | 0,56  | 1,47  | 0,18393 | NM_001166263    | CERK     |
| 8076792 | 0,89 | 1,85 | 0,08453 | 2,69  | 6,47  | 0,00055 | NM_022766       | C9orf23  |
| 8160835 | 0,89 | 1,85 | 0,00865 | 2,31  | 4,98  | 0,00020 | NM_148179       | CLIC2    |
| 8176234 | 0,89 | 1,85 | 0,04598 | -0,23 | -1,17 | 0,46041 | NM_001289       | UCK2     |
| 7906995 | 0,89 | 1,85 | 0,05372 | 1,48  | 2,79  | 0,00015 | NM_012474       | C17orf95 |
| 8010086 | 0,89 | 1,85 | 0,16915 | 3,11  | 8,62  | 0,00219 | ENST00000341249 | CCL4     |
| 8006602 | 0,89 | 1,85 | 0,08692 | -0,99 | -1,98 | 0,20419 | NM_002984       | STIL     |
| 7915926 | 0,89 | 1,85 | 0,05194 | 2,97  | 7,86  | 0,00105 | NM_001048166    | SARNP    |
| 7963923 | 0,88 | 1,85 | 0,00641 | 3,03  | 8,15  | 0,00037 | NR_026723       | FGL2     |
| 8140463 | 0,88 | 1,84 | 0,47838 | -1,15 | -2,22 | 0,07124 | NM_006682       | ZNF700   |
| 8025973 | 0,88 | 1,84 | 0,03873 | 0,59  | 1,50  | 0,33473 | NM_144566       | RPL23P8  |
| 8131705 | 0,88 | 1,84 | 0,01959 | 0,12  | 1,09  | 0,85980 | NR_026673       | AGAP1    |
| 8049448 | 0,88 | 1,84 | 0,03312 | 1,83  | 3,56  | 0,02994 | NM_001037131    | BAT3     |
| 8124967 | 0,88 | 1,84 | 0,01693 | 2,69  | 6,46  | 0,00346 | NM_004639       | MLF1IP   |
| 8103932 | 0,88 | 1,84 | 0,09001 | 1,30  | 2,46  | 0,03722 | NM_024629       | RAB34    |
| 8013753 | 0,88 | 1,84 | 0,09788 | 2,65  | 6,26  | 0,00452 | NM_031934       | TRIM27   |
| 8124610 | 0,88 | 1,84 | 0,11835 | 2,15  | 4,44  | 0,01243 | NM_006510       | TRIM27   |
| 8179575 | 0,88 | 1,84 | 0,11835 | 2,15  | 4,44  | 0,01243 | NM_006510       | RANBP10  |
| 8002087 | 0,88 | 1,84 | 0,03746 | 1,63  | 3,09  | 0,00236 | NM_020850       | IMP4     |
| 8045171 | 0,88 | 1,84 | 0,29262 | 1,83  | 3,54  | 0,02890 | NM_033416       | ANP32E   |
| 7919715 | 0,88 | 1,84 | 0,03497 | 2,05  | 4,14  | 0,00923 | NM_030920       | ZSWIM3   |
| 8063071 | 0,88 | 1,84 | 0,11312 | 0,90  | 1,87  | 0,01293 | NM_080752       | PDLIM7   |
| 8116070 | 0,88 | 1,84 | 0,03635 | 1,38  | 2,61  | 0,05967 | NM_005451       | N4BP2L1  |
| 7970892 | 0,88 | 1,84 | 0,04869 | 0,34  | 1,27  | 0,21332 | NM_052818       | STK40    |
| 7914904 | 0,88 | 1,84 | 0,10680 | 2,28  | 4,84  | 0,00325 | NM_032017       | UBE2B    |

|         |      |      |         |       |       |         |                  |          |
|---------|------|------|---------|-------|-------|---------|------------------|----------|
| 8108066 | 0,88 | 1,84 | 0,09741 | 0,76  | 1,69  | 0,01865 | NM_003337        | SNORD76  |
| 7922414 | 0,88 | 1,84 | 0,21608 | 0,42  | 1,34  | 0,75001 | NR_003942        | UBTF     |
| 8015969 | 0,88 | 1,84 | 0,15675 | 1,33  | 2,52  | 0,00194 | NM_014233        | CNTNAP1  |
| 8007323 | 0,88 | 1,84 | 0,03633 | 1,45  | 2,73  | 0,01215 | NM_003632        | TP53     |
| 8012257 | 0,88 | 1,84 | 0,61001 | 4,12  | 17,41 | 0,00016 | NM_000546        | TRUB1    |
| 7930703 | 0,88 | 1,84 | 0,11883 | 2,27  | 4,81  | 0,00059 | NM_139169        | NBEAL1   |
| 8047596 | 0,88 | 1,84 | 0,12037 | 1,91  | 3,75  | 0,00047 | NM_001114132     | C16orf52 |
| 7993889 | 0,88 | 1,84 | 0,33275 | 3,10  | 8,58  | 0,00173 | NM_001164579     | C7orf11  |
| 8165648 | 0,88 | 1,84 | 0,50158 | -2,22 | -4,67 | 0,00104 | AK290098 ANAPC13 |          |
| 8090866 | 0,88 | 1,84 | 0,03683 | 2,98  | 7,89  | 0,00046 | NR_024400        | EFCAB7   |
| 7901931 | 0,88 | 1,84 | 0,03434 | 1,11  | 2,16  | 0,07335 | NM_032437        | PDCD5    |
| 8027473 | 0,88 | 1,84 | 0,05493 | 1,05  | 2,07  | 0,14664 | NM_004708        | C4orf49  |
| 8102831 | 0,88 | 1,84 | 0,12332 | -0,32 | -1,25 | 0,14002 | NM_032623        | 06_Sep   |
| 8174692 | 0,88 | 1,83 | 0,01836 | 2,97  | 7,86  | 0,00053 | NM_145799        | MFSD10   |
| 8099037 | 0,88 | 1,83 | 0,17334 | 1,86  | 3,64  | 0,04883 | NM_001146069     | ---      |
| 7986246 | 0,87 | 1,83 | 0,14960 | 3,09  | 8,50  | 0,02781 | ---              | ZCCHC10  |
| 8114113 | 0,87 | 1,83 | 0,07968 | -0,27 | -1,21 | 0,30489 | NM_017665        | PHF20    |
| 8062213 | 0,87 | 1,83 | 0,06056 | 2,28  | 4,84  | 0,00116 | NM_016436        | ANKRD44  |
| 8057990 | 0,87 | 1,83 | 0,17644 | 1,70  | 3,26  | 0,01206 | NM_153697        | MT1IP    |
| 7995834 | 0,87 | 1,83 | 0,00758 | -0,64 | -1,55 | 0,06267 | NR_003669        | COPS7A   |
| 7953395 | 0,87 | 1,83 | 0,02072 | 1,85  | 3,60  | 0,00172 | NM_001164094     | KIAA0495 |
| 7911854 | 0,87 | 1,83 | 0,13454 | 1,29  | 2,45  | 0,01307 | NM_207306        | NACA2    |
| 8017259 | 0,87 | 1,83 | 0,04940 | -0,22 | -1,17 | 0,50599 | NM_199290        | RAB6A    |
| 7950284 | 0,87 | 1,83 | 0,12907 | 3,51  | 11,37 | 0,00194 | NM_002869        | ---      |
| 8165686 | 0,87 | 1,83 | 0,29926 | -1,52 | -2,88 | 0,00049 | ---              | YPEL3    |
| 8000791 | 0,87 | 1,83 | 0,15001 | 0,80  | 1,74  | 0,23515 | NM_031477        | WDR5     |
| 8159111 | 0,87 | 1,83 | 0,02156 | 2,37  | 5,17  | 0,00167 | NM_017588        | NMT2     |
| 7932227 | 0,87 | 1,83 | 0,09437 | 1,82  | 3,53  | 0,00496 | NM_004808        | HCCS     |
| 8165995 | 0,87 | 1,83 | 0,16931 | 2,65  | 6,27  | 0,00503 | NM_005333        | NME5     |
| 8114354 | 0,87 | 1,83 | 0,14034 | -1,30 | -2,46 | 0,00588 | NM_003551        | GATA6    |
| 8020455 | 0,87 | 1,83 | 0,12059 | -0,98 | -1,97 | 0,12297 | NM_005257        | PREP     |
| 8128572 | 0,87 | 1,83 | 0,13926 | 2,38  | 5,22  | 0,00047 | NM_002726        | VN1R1    |
| 8039642 | 0,87 | 1,83 | 0,00660 | 0,04  | 1,03  | 0,82832 | NM_020633        | RTN3     |
| 7940781 | 0,87 | 1,83 | 0,05043 | 0,51  | 1,43  | 0,41077 | NM_201428        | CPEB4    |
| 8110055 | 0,87 | 1,83 | 0,11687 | 0,47  | 1,38  | 0,11333 | NM_030627        | ROMO1    |
| 8062206 | 0,87 | 1,82 | 0,07680 | 1,12  | 2,18  | 0,00732 | NM_080748        | SDC4     |
| 8066513 | 0,87 | 1,82 | 0,17546 | 1,80  | 3,49  | 0,01623 | NM_002999        | IQCK     |
| 7993713 | 0,87 | 1,82 | 0,05719 | 1,09  | 2,13  | 0,00009 | NM_153208        | CARS     |
| 7945803 | 0,87 | 1,82 | 0,09162 | 2,24  | 4,72  | 0,00009 | NM_001014438     | MTHFD2L  |
| 8095705 | 0,87 | 1,82 | 0,04688 | 1,73  | 3,31  | 0,02823 | NM_001144978     | FAM53C   |
| 8108321 | 0,86 | 1,82 | 0,08533 | 1,55  | 2,94  | 0,00100 | NM_001135647     | EEF1E1   |
| 8123819 | 0,86 | 1,82 | 0,14777 | 1,58  | 2,99  | 0,04971 | NM_004280        | NPIPL3   |
| 8022320 | 0,86 | 1,82 | 0,45469 | 0,70  | 1,63  | 0,04213 | NM_130464        | HNRNPA3  |
| 7971920 | 0,86 | 1,82 | 0,24747 | 1,22  | 2,34  | 0,04242 | NM_194247        | ZNF320   |
| 8039006 | 0,86 | 1,82 | 0,03779 | 1,13  | 2,18  | 0,05262 | NM_207333        | SGSH     |
| 8019061 | 0,86 | 1,82 | 0,01634 | 1,24  | 2,36  | 0,04825 | NM_000199        | AIP      |
| 7941927 | 0,86 | 1,82 | 0,11803 | 1,11  | 2,16  | 0,00208 | NM_003977        | BCL2A1   |
| 7990818 | 0,86 | 1,82 | 0,16955 | 0,13  | 1,09  | 0,69823 | NM_001114735     | LPAR3    |
| 7917276 | 0,86 | 1,82 | 0,28695 | 1,10  | 2,14  | 0,05270 | NM_012152        | COX11    |
| 8016825 | 0,86 | 1,82 | 0,00129 | 2,25  | 4,75  | 0,00100 | NM_004375        | RTKN2    |
| 7933855 | 0,86 | 1,82 | 0,21968 | -0,33 | -1,26 | 0,19477 | NM_145307        | SCML2    |
| 8171561 | 0,86 | 1,82 | 0,08403 | 2,80  | 6,95  | 0,00014 | NM_006089        | NAIP     |
| 8112521 | 0,86 | 1,82 | 0,06695 | 1,22  | 2,33  | 0,02562 | NM_004536        | NAIP     |
| 8177527 | 0,86 | 1,82 | 0,06695 | 1,22  | 2,33  | 0,02562 | NM_004536        | ZNF14    |
| 8035765 | 0,86 | 1,82 | 0,10168 | 1,18  | 2,26  | 0,04433 | NM_021030        | C1orf55  |
| 7924686 | 0,86 | 1,82 | 0,24131 | 2,40  | 5,26  | 0,00003 | NM_152608        | ---      |
| 8063313 | 0,86 | 1,82 | 0,09990 | -0,72 | -1,65 | 0,19431 | ---              | OLFML1   |
| 7938225 | 0,86 | 1,81 | 0,15908 | -1,35 | -2,54 | 0,01048 | NM_198474        | THEM4    |
| 7920114 | 0,86 | 1,81 | 0,15064 | 3,27  | 9,68  | 0,00076 | NM_053055        | TCEB1    |
| 8151413 | 0,86 | 1,81 | 0,03654 | 1,70  | 3,24  | 0,02504 | NM_005648        | CPNE2    |
| 7995976 | 0,86 | 1,81 | 0,05992 | 2,61  | 6,12  | 0,00007 | NM_152727        | BIN3     |
| 8149707 | 0,86 | 1,81 | 0,05210 | 0,59  | 1,51  | 0,00644 | NM_018688        | E2F3     |
| 8117128 | 0,86 | 1,81 | 0,06035 | 0,80  | 1,74  | 0,00851 | NM_001949        | PBX2     |
| 8125360 | 0,86 | 1,81 | 0,00087 | 1,51  | 2,86  | 0,00966 | NM_002586        | AIG1     |
| 8122396 | 0,86 | 1,81 | 0,22950 | 1,37  | 2,59  | 0,01163 | NM_016108        | OSBPL3   |
| 8138613 | 0,86 | 1,81 | 0,03281 | 1,18  | 2,26  | 0,02938 | NM_015550        | RNF24    |
| 8064766 | 0,86 | 1,81 | 0,10258 | 0,11  | 1,08  | 0,41814 | NM_001134338     | NUFIP1   |
| 7971361 | 0,86 | 1,81 | 0,21262 | 1,93  | 3,81  | 0,02691 | NM_012345        | SLC19A3  |
| 8059538 | 0,86 | 1,81 | 0,20077 | 0,63  | 1,55  | 0,01409 | NM_025243        | USP47    |
| 7938448 | 0,86 | 1,81 | 0,08065 | 1,79  | 3,47  | 0,00897 | NM_017944        | PLCG1    |
| 8062623 | 0,86 | 1,81 | 0,02867 | 1,20  | 2,30  | 0,00511 | NM_002660        | AMOTL1   |
| 7943263 | 0,86 | 1,81 | 0,03275 | 0,10  | 1,07  | 0,75594 | NM_130847        | CXXC5    |
| 8108447 | 0,86 | 1,81 | 0,12663 | 0,37  | 1,29  | 0,08881 | NM_016463        | KLHL18   |

|                        |      |      |         |       |       |         |                                     |                           |
|------------------------|------|------|---------|-------|-------|---------|-------------------------------------|---------------------------|
| 8079517                | 0,85 | 1,81 | 0,02543 | 1,36  | 2,57  | 0,00044 | NM_025010                           | RPUSD4                    |
| 7952549                | 0,85 | 1,81 | 0,01103 | 1,27  | 2,41  | 0,00152 | NM_032795                           | CREB3                     |
| 8155096                | 0,85 | 1,81 | 0,20590 | 1,54  | 2,91  | 0,03428 | NM_006368                           | GLRX3                     |
| 7931393                | 0,85 | 1,81 | 0,12018 | 2,19  | 4,56  | 0,00083 | NM_006541                           | KIAA0355                  |
| 8027604                | 0,85 | 1,81 | 0,13501 | 2,08  | 4,24  | 0,00072 | NM_014686                           | PELI1                     |
| 8052654                | 0,85 | 1,81 | 0,21677 | 3,47  | 11,10 | 0,00028 | NM_020651                           | TPI1                      |
| 7902435                | 0,85 | 1,81 | 0,26304 | 2,37  | 5,16  | 0,02604 | NM_000365                           | ZNF98                     |
| 8035831                | 0,85 | 1,81 | 0,00637 | 0,18  | 1,13  | 0,35612 | NM_001098626                        | DNAJC24                   |
| 7939093                | 0,85 | 1,81 | 0,01975 | 0,66  | 1,58  | 0,28193 | NM_181706                           | CCDC52                    |
| 8089627                | 0,85 | 1,80 | 0,05633 | 1,85  | 3,59  | 0,01419 | NM_144718                           | C22orf9                   |
| 8076690                | 0,85 | 1,80 | 0,20384 | 1,79  | 3,46  | 0,03365 | NM_001009880                        | NACC1                     |
| 8026155                | 0,85 | 1,80 | 0,05166 | 1,42  | 2,67  | 0,01511 | NM_052876                           | ATG4C                     |
| 7901895                | 0,85 | 1,80 | 0,14575 | 1,85  | 3,61  | 0,00246 | NM_032852                           | PKP4                      |
| 8045860                | 0,85 | 1,80 | 0,01224 | 2,84  | 7,15  | 0,00003 | NM_003628                           | KLHL8                     |
| 8101624                | 0,85 | 1,80 | 0,03694 | 1,10  | 2,15  | 0,02072 | NM_020803                           | ZNF678                    |
| 7910190                | 0,85 | 1,80 | 0,04208 | 1,80  | 3,49  | 0,00769 | NR_033184                           | USP21                     |
| 7906671                | 0,85 | 1,80 | 0,04561 | 3,54  | 11,66 | 0,00039 | NM_001014443                        | SNTB1                     |
| 8152606                | 0,85 | 1,80 | 0,05011 | 0,67  | 1,59  | 0,22796 | NM_021021                           | LRRFIP1                   |
| 8049512                | 0,85 | 1,80 | 0,18953 | 1,98  | 3,94  | 0,01123 | NM_001137552                        | C11orf49                  |
| 7939723                | 0,85 | 1,80 | 0,03757 | 0,91  | 1,88  | 0,18534 | NM_001003676                        | USP32                     |
| 8013262                | 0,85 | 1,80 | 0,05016 | 1,98  | 3,94  | 0,00047 | ENST00000300896                     | CWC27                     |
| 8105612                | 0,85 | 1,80 | 0,04763 | 1,32  | 2,50  | 0,00012 | NM_005869                           | C1D                       |
| 7932964                | 0,85 | 1,80 | 0,24686 | 2,48  | 5,58  | 0,00035 | NM_006333                           | PPA2                      |
| 8102141                | 0,85 | 1,80 | 0,18734 | 1,97  | 3,92  | 0,02117 | NM_176869                           | FXN                       |
| 8155699                | 0,85 | 1,80 | 0,34267 | 2,63  | 6,19  | 0,00172 | NM_000144                           | SEPSECS                   |
| 8099696                | 0,85 | 1,80 | 0,13985 | 2,55  | 5,84  | 0,00002 | NM_016955                           | SNORA70 //                |
| SNORA70                |      |      |         |       |       |         |                                     |                           |
| 8025498                | 0,85 | 1,80 | 0,13055 | 5,06  | 33,41 | 0,00003 | NR_000011 // NR_000011              | C3orf63                   |
| 8088219                | 0,85 | 1,80 | 0,09236 | 1,39  | 2,62  | 0,00841 | NM_001112736                        | RAD54B                    |
| 8151824                | 0,85 | 1,80 | 0,05234 | 2,28  | 4,87  | 0,00478 | NM_012415                           | TMEM19                    |
| 7957167                | 0,84 | 1,80 | 0,14182 | 3,48  | 11,17 | 0,00024 | NM_018279                           | THBS3                     |
| 7920664                | 0,84 | 1,79 | 0,07843 | 1,58  | 2,98  | 0,01687 | NM_007112                           | C12orf41                  |
| 7962811                | 0,84 | 1,79 | 0,00193 | 1,83  | 3,54  | 0,00843 | NM_017822                           | LLPH                      |
| 7956876                | 0,84 | 1,79 | 0,10315 | -0,94 | -1,92 | 0,04207 | NM_032338                           | PTPN9                     |
| 7990511                | 0,84 | 1,79 | 0,22618 | 3,65  | 12,54 | 0,00003 | NM_002833                           | FAM183A                   |
| 7900635                | 0,84 | 1,79 | 0,00282 | -0,52 | -1,44 | 0,02702 | NM_001101376                        | ---                       |
| 8016806                | 0,84 | 1,79 | 0,04447 | -0,13 | -1,09 | 0,80842 | ---                                 | IMMT                      |
| 8053533                | 0,84 | 1,79 | 0,19132 | 3,02  | 8,14  | 0,00039 | NM_006839                           | XG                        |
| 8165808                | 0,84 | 1,79 | 0,25427 | -1,38 | -2,60 | 0,04741 | NM_001141919                        | RP2                       |
| 8167006                | 0,84 | 1,79 | 0,05824 | 0,35  | 1,28  | 0,05747 | NM_006915                           | LRRC37B                   |
| 8006336                | 0,84 | 1,79 | 0,06334 | 3,24  | 9,44  | 0,00333 | NM_052888                           | WDR12                     |
| 8058373                | 0,84 | 1,79 | 0,26778 | 2,33  | 5,04  | 0,00061 | NM_018256                           | FAM92A1                   |
| 8147307                | 0,84 | 1,79 | 0,35103 | 1,08  | 2,11  | 0,24576 | BC014598 EIF2B4                     |                           |
| 8051097                | 0,84 | 1,79 | 0,22389 | 1,90  | 3,72  | 0,00621 | NM_001034116                        | DCP2                      |
| 8107356                | 0,84 | 1,79 | 0,22099 | 1,50  | 2,83  | 0,00036 | NM_152624                           | CPSF6                     |
| 7957008                | 0,84 | 1,79 | 0,02709 | 1,95  | 3,86  | 0,00035 | NM_007007                           | SLC36A4                   |
| 7950990                | 0,84 | 1,79 | 0,29789 | 2,26  | 4,78  | 0,00541 | NM_152313                           | RACGAP1                   |
| 7963157                | 0,84 | 1,79 | 0,13185 | 3,69  | 12,93 | 0,00198 | NM_013277                           | ---                       |
| 7990564                | 0,84 | 1,79 | 0,46547 | -0,38 | -1,30 | 0,18714 | ---                                 | LOC441453 // LOC441453 // |
| LOC441453 // LOC441453 |      |      |         |       |       |         |                                     |                           |
| 7938683                | 0,84 | 1,79 | 0,56176 | 0,32  | 1,24  | 0,61691 | BC008657 // BC008657 // BC008657 // |                           |
| BC008657 C18orf55      |      |      |         |       |       |         |                                     |                           |
| 8021716                | 0,84 | 1,79 | 0,16373 | 0,84  | 1,80  | 0,07422 | NM_014177                           | C8orf45                   |
| 8146738                | 0,84 | 1,79 | 0,02741 | 2,97  | 7,85  | 0,00124 | NM_001136161                        | GGA3                      |
| 8018324                | 0,84 | 1,79 | 0,02157 | 2,92  | 7,59  | 0,00014 | NR_033345                           | ZCCHC14                   |
| 8003263                | 0,84 | 1,79 | 0,22299 | 2,82  | 7,04  | 0,00068 | NM_015144                           | THAP6                     |
| 8095760                | 0,84 | 1,79 | 0,25840 | 1,96  | 3,90  | 0,00400 | NM_144721                           | ENOX1                     |
| 7971311                | 0,84 | 1,79 | 0,04177 | 0,13  | 1,09  | 0,74621 | NM_017993                           | HMG2N                     |
| 7982204                | 0,84 | 1,79 | 0,58324 | 0,50  | 1,41  | 0,32001 | NM_005517                           | BGN                       |
| 8170648                | 0,84 | 1,79 | 0,22816 | -1,34 | -2,53 | 0,01812 | NM_001711                           | SLC1A4                    |
| 8042310                | 0,84 | 1,79 | 0,05294 | 2,35  | 5,09  | 0,00293 | NM_003038                           | PAPD7                     |
| 8104378                | 0,84 | 1,78 | 0,09865 | 3,63  | 12,42 | 0,00024 | NM_006999                           | ZNF280B                   |
| 8074845                | 0,84 | 1,78 | 0,07837 | 2,58  | 5,98  | 0,00070 | NM_080764                           | SNORD14C                  |
| 7952339                | 0,84 | 1,78 | 0,23960 | 0,64  | 1,56  | 0,16415 | NR_001453                           | RAD1                      |
| 8111457                | 0,83 | 1,78 | 0,09106 | 0,90  | 1,86  | 0,02697 | NM_002853                           | BAG4                      |
| 8145914                | 0,83 | 1,78 | 0,19313 | 0,80  | 1,74  | 0,15792 | NM_004874                           | ZNF616                    |
| 8038954                | 0,83 | 1,78 | 0,07276 | 0,46  | 1,38  | 0,01171 | NM_178523                           | CHST11                    |
| 7958202                | 0,83 | 1,78 | 0,03003 | 1,84  | 3,58  | 0,00022 | NM_018413                           | FABP4                     |
| 8151532                | 0,83 | 1,78 | 0,01067 | -1,05 | -2,07 | 0,03697 | NM_001442                           | SLC38A5                   |
| 8172425                | 0,83 | 1,78 | 0,05673 | -1,14 | -2,20 | 0,00300 | NM_033518                           | PRKAB1                    |
| 7959123                | 0,83 | 1,78 | 0,01271 | 1,32  | 2,50  | 0,01574 | NM_006253                           | DDX41                     |
| 8116096                | 0,83 | 1,78 | 0,14896 | 3,00  | 7,98  | 0,00078 | NM_016222                           | SEPT7L                    |
| 7933115                | 0,83 | 1,78 | 0,00515 | 0,65  | 1,57  | 0,05523 | NR_027269                           | CEP70                     |

|         |      |      |         |       |       |         |                |          |
|---------|------|------|---------|-------|-------|---------|----------------|----------|
| 8090988 | 0,83 | 1,78 | 0,11636 | 2,64  | 6,24  | 0,00351 | NM_024491      | XRCC6BP1 |
| 7956648 | 0,83 | 1,78 | 0,06986 | 1,51  | 2,84  | 0,00599 | NM_033276      | LIG3     |
| 8006479 | 0,83 | 1,78 | 0,12515 | 1,16  | 2,23  | 0,01068 | NM_013975      | SFRS8    |
| 7959927 | 0,83 | 1,78 | 0,21027 | 1,42  | 2,68  | 0,00163 | NM_004592      | C3orf59  |
| 8092765 | 0,83 | 1,78 | 0,18108 | 2,39  | 5,26  | 0,00028 | NM_178496      | ---      |
| 7980096 | 0,83 | 1,78 | 0,25857 | 2,08  | 4,22  | 0,02912 | --- LSM1       | ---      |
| 8150266 | 0,83 | 1,78 | 0,24416 | 0,70  | 1,63  | 0,06000 | NM_014462      | NUDT13   |
| 7934299 | 0,83 | 1,78 | 0,15760 | 1,03  | 2,05  | 0,04981 | NM_015901      | ARMC10   |
| 8089034 | 0,83 | 1,78 | 0,14457 | 2,18  | 4,54  | 0,00009 | NM_001161009   | AARSD1   |
| 8015741 | 0,83 | 1,77 | 0,00519 | 1,66  | 3,15  | 0,00050 | NM_001136042   | RNF219   |
| 7972180 | 0,83 | 1,77 | 0,03056 | 0,44  | 1,36  | 0,25352 | NM_024546      | DDX60    |
| 8103563 | 0,83 | 1,77 | 0,19037 | 0,23  | 1,17  | 0,41175 | NM_017631      | UBXN6    |
| 8032815 | 0,83 | 1,77 | 0,03853 | 1,06  | 2,08  | 0,01199 | NM_025241      | RUFY2    |
| 7933999 | 0,82 | 1,77 | 0,00231 | 1,26  | 2,39  | 0,01951 | NM_017987      | SYNGR1   |
| 8073104 | 0,82 | 1,77 | 0,05888 | 1,27  | 2,40  | 0,10662 | NM_004711      | ---      |
| 8040463 | 0,82 | 1,77 | 0,00272 | 0,02  | 1,01  | 0,93019 | --- CSTF2T     | ---      |
| 7933659 | 0,82 | 1,77 | 0,12299 | 0,41  | 1,33  | 0,12474 | NM_015235      | SGTB     |
| 8112409 | 0,82 | 1,77 | 0,21759 | 1,80  | 3,47  | 0,00288 | NM_019072      | ZNF555   |
| 8024518 | 0,82 | 1,77 | 0,06557 | 1,74  | 3,35  | 0,01429 | NM_152791      | DHX33    |
| 8011861 | 0,82 | 1,77 | 0,27266 | 3,81  | 14,00 | 0,00020 | NM_020162      | SPTLC3   |
| 8060997 | 0,82 | 1,77 | 0,16518 | -0,79 | -1,73 | 0,00521 | NM_018327      | LARP1B   |
| 8097388 | 0,82 | 1,77 | 0,00049 | 1,16  | 2,24  | 0,10714 | NM_018078      | ZNF410   |
| 7975645 | 0,82 | 1,77 | 0,07185 | 2,62  | 6,15  | 0,00058 | NM_021188      | C18orf54 |
| 8021286 | 0,82 | 1,77 | 0,08563 | 0,88  | 1,85  | 0,06195 | NM_173529      | PHF12    |
| 8013812 | 0,82 | 1,77 | 0,07982 | 2,89  | 7,43  | 0,00098 | NM_001033561   | PDE4D    |
| 8112220 | 0,82 | 1,76 | 0,00747 | -0,26 | -1,20 | 0,05501 | NM_001165899   | UGT2B7   |
| 8100758 | 0,82 | 1,76 | 0,61323 | -3,31 | -9,93 | 0,00809 | NM_001074      | NEK3     |
| 7971780 | 0,82 | 1,76 | 0,04117 | 2,52  | 5,75  | 0,00104 | NM_002498      | TIMM23   |
| 7927548 | 0,82 | 1,76 | 0,24536 | 0,00  | -1,00 | 0,99948 | NM_006327      | NCOA6    |
| 8065776 | 0,82 | 1,76 | 0,36027 | 3,13  | 8,76  | 0,00110 | NM_014071      | TTC21B   |
| 8056426 | 0,82 | 1,76 | 0,22494 | 1,98  | 3,96  | 0,00131 | NM_024753      | PTS      |
| 7943882 | 0,82 | 1,76 | 0,12336 | 1,94  | 3,84  | 0,00606 | NM_000317      | INTS10   |
| 8144894 | 0,82 | 1,76 | 0,10843 | 2,66  | 6,31  | 0,00012 | NM_018142      | NCKAP5   |
| 8055323 | 0,82 | 1,76 | 0,09923 | -1,35 | -2,54 | 0,00419 | NM_207363      | ---      |
| 8165692 | 0,82 | 1,76 | 0,59763 | -3,22 | -9,33 | 0,00477 | --- ZNF543     | ---      |
| 8031720 | 0,82 | 1,76 | 0,32234 | 1,63  | 3,11  | 0,02648 | NM_213598      | GAN      |
| 7997414 | 0,82 | 1,76 | 0,10889 | 2,87  | 7,30  | 0,00349 | NM_022041      | SLC7A6OS |
| 8002237 | 0,82 | 1,76 | 0,08616 | 2,85  | 7,19  | 0,00036 | NM_032178      | CRY1     |
| 7966052 | 0,81 | 1,76 | 0,05033 | 0,54  | 1,45  | 0,00139 | NM_004075      | MSRB2    |
| 7926661 | 0,81 | 1,76 | 0,07592 | 0,92  | 1,90  | 0,03078 | NM_012228      | CCBE1    |
| 8023575 | 0,81 | 1,76 | 0,01650 | 0,72  | 1,65  | 0,01460 | NM_133459      | BACE2    |
| 8068671 | 0,81 | 1,76 | 0,07924 | 2,44  | 5,42  | 0,00119 | NM_012105      | ZCRB1    |
| 7962367 | 0,81 | 1,76 | 0,05823 | 1,24  | 2,36  | 0,03961 | NM_033114      | CLCN5    |
| 8167603 | 0,81 | 1,76 | 0,00083 | 1,00  | 2,00  | 0,00438 | NM_001127899   | DUS2L    |
| 7996725 | 0,81 | 1,76 | 0,15547 | 4,12  | 17,43 | 0,00011 | NM_017803      | CPSF4    |
| 8134599 | 0,81 | 1,76 | 0,06668 | 3,68  | 12,84 | 0,00149 | NM_006693      | FUCA1    |
| 7913694 | 0,81 | 1,76 | 0,16712 | 3,16  | 8,91  | 0,00033 | NM_000147      | USP36    |
| 8018937 | 0,81 | 1,76 | 0,04320 | 1,24  | 2,36  | 0,01645 | NM_025090      | ---      |
| 8095341 | 0,81 | 1,76 | 0,28387 | -0,66 | -1,58 | 0,02584 | --- ---        | ---      |
| 7962479 | 0,81 | 1,76 | 0,22559 | -2,70 | -6,50 | 0,18793 | --- C20orf72   | ---      |
| 8061129 | 0,81 | 1,76 | 0,08590 | 2,32  | 4,98  | 0,01395 | BC016869 AEBP1 | ---      |
| 8132557 | 0,81 | 1,76 | 0,01532 | -1,14 | -2,20 | 0,00591 | NM_001129      | ZNF720   |
| 7995252 | 0,81 | 1,76 | 0,39580 | 4,25  | 19,09 | 0,00090 | NM_001130913   | ---      |
| 8146955 | 0,81 | 1,76 | 0,57031 | -2,72 | -6,59 | 0,00118 | --- ZNF44      | ---      |
| 8034349 | 0,81 | 1,75 | 0,17011 | -0,12 | -1,09 | 0,71917 | NM_001164276   | NUAK2    |
| 7923753 | 0,81 | 1,75 | 0,10187 | 3,47  | 11,06 | 0,00057 | NM_030952      | MIR21    |
| 8008885 | 0,81 | 1,75 | 0,15202 | 1,12  | 2,18  | 0,05062 | NR_029493      | LRRC32   |
| 7950555 | 0,81 | 1,75 | 0,07708 | -2,41 | -5,33 | 0,00015 | NM_001128922   | PSG3     |
| 8037231 | 0,81 | 1,75 | 0,14995 | -0,96 | -1,94 | 0,07981 | NM_021016      | MOBK13   |
| 8047228 | 0,81 | 1,75 | 0,25885 | 2,46  | 5,50  | 0,00092 | NM_199482      | ETS1     |
| 7952601 | 0,81 | 1,75 | 0,06734 | 1,42  | 2,68  | 0,03555 | NM_001143820   | SLC35F2  |
| 7951485 | 0,81 | 1,75 | 0,01348 | 3,61  | 12,24 | 0,00259 | NM_017515      | NPIP     |
| 7993580 | 0,81 | 1,75 | 0,49024 | 0,02  | 1,02  | 0,91972 | NM_006985      | PTHLH    |
| 7962000 | 0,81 | 1,75 | 0,04080 | -0,37 | -1,30 | 0,03354 | NM_198965      | SNAP47   |
| 7910200 | 0,80 | 1,75 | 0,04613 | 0,79  | 1,73  | 0,03421 | NM_053052      | EPCAM    |
| 8098439 | 0,80 | 1,75 | 0,40833 | 3,93  | 15,26 | 0,08258 | NM_002354      | ZBTB34   |
| 8157945 | 0,80 | 1,75 | 0,28577 | 1,05  | 2,07  | 0,06594 | NM_001099270   | GYS1     |
| 8038261 | 0,80 | 1,75 | 0,15647 | 2,02  | 4,04  | 0,00053 | NM_002103      | ZNF571   |
| 8036406 | 0,80 | 1,75 | 0,00129 | -0,08 | -1,06 | 0,83565 | NM_016536      | WBP1     |
| 8053599 | 0,80 | 1,74 | 0,06048 | 2,82  | 7,07  | 0,00025 | NM_012477      | ZNF251   |
| 8153890 | 0,80 | 1,74 | 0,03061 | 2,05  | 4,14  | 0,00300 | NM_138367      | JAM2     |
| 8068024 | 0,80 | 1,74 | 0,08490 | -0,97 | -1,96 | 0,03069 | NM_021219      | CY7SA    |
| 8071881 | 0,80 | 1,74 | 0,02975 | 1,78  | 3,44  | 0,00696 | NM_015330      | BCKDHA   |

|         |      |      |         |       |       |         |                 |           |
|---------|------|------|---------|-------|-------|---------|-----------------|-----------|
| 8029065 | 0,80 | 1,74 | 0,08821 | 2,33  | 5,01  | 0,02009 | NM_000709       | PLEKHM1   |
| 8016239 | 0,80 | 1,74 | 0,13063 | 0,15  | 1,11  | 0,81976 | NR_027774       | C12orf57  |
| 7953564 | 0,80 | 1,74 | 0,21194 | 3,37  | 10,34 | 0,00002 | NM_138425       | ZNF329    |
| 8039740 | 0,80 | 1,74 | 0,19002 | 0,62  | 1,53  | 0,07865 | NM_024620       | CXADR     |
| 8067955 | 0,80 | 1,74 | 0,25397 | 3,04  | 8,25  | 0,00625 | NM_001338       | ZNF559    |
| 8025478 | 0,80 | 1,74 | 0,05517 | 2,29  | 4,91  | 0,00164 | NM_032497       | FBXO42    |
| 7912750 | 0,80 | 1,74 | 0,16530 | 3,02  | 8,11  | 0,00199 | NM_018994       | MRPS36    |
| 8105852 | 0,80 | 1,74 | 0,10143 | 0,43  | 1,35  | 0,09064 | NM_033281       | KATNA1    |
| 8130102 | 0,80 | 1,74 | 0,32407 | 2,21  | 4,62  | 0,02407 | NM_007044       | ---       |
| 7907970 | 0,80 | 1,74 | 0,12535 | 1,55  | 2,93  | 0,01635 | ---             | VHL       |
| 8077781 | 0,80 | 1,74 | 0,18565 | 1,95  | 3,87  | 0,00023 | NM_000551       | ---       |
| 7898276 | 0,80 | 1,74 | 0,02978 | 1,44  | 2,71  | 0,01506 | ---             | INPP1     |
| 8047069 | 0,80 | 1,74 | 0,17694 | 1,23  | 2,35  | 0,01384 | NM_001128928    | GATSL1    |
| 8133540 | 0,80 | 1,74 | 0,29544 | 2,70  | 6,49  | 0,00184 | NM_001145063    | GATSL1    |
| 8140249 | 0,80 | 1,74 | 0,29544 | 2,70  | 6,49  | 0,00184 | NM_001145063    | LBR       |
| 7924603 | 0,80 | 1,74 | 0,11747 | 2,86  | 7,24  | 0,00130 | NM_002296       | RPL8      |
| 8153903 | 0,80 | 1,74 | 0,19970 | 3,05  | 8,30  | 0,00480 | NM_000973       | SRD5A1    |
| 8104369 | 0,80 | 1,74 | 0,06978 | 1,58  | 2,99  | 0,00268 | NM_001047       | ALG1      |
| 7993071 | 0,80 | 1,74 | 0,03924 | 1,49  | 2,82  | 0,06823 | NM_019109       | ARPC5     |
| 7922793 | 0,80 | 1,74 | 0,10454 | 1,76  | 3,38  | 0,00722 | NM_005717       | XAB2      |
| 8033392 | 0,80 | 1,74 | 0,23208 | 1,73  | 3,31  | 0,00083 | NM_020196       | TBX18     |
| 8127932 | 0,79 | 1,73 | 0,23534 | -1,32 | -2,49 | 0,02069 | NM_001080508    | TIAL1     |
| 7936683 | 0,79 | 1,73 | 0,07273 | 1,16  | 2,24  | 0,06924 | NM_001033925    | KCNMA1    |
| 7934570 | 0,79 | 1,73 | 0,07094 | 0,61  | 1,53  | 0,00124 | NM_001014797    | GLUD1     |
| 7928907 | 0,79 | 1,73 | 0,29515 | -1,42 | -2,67 | 0,21441 | NM_005271       | LTV1      |
| 8122440 | 0,79 | 1,73 | 0,23712 | 1,57  | 2,97  | 0,00675 | NM_032860       | SLC25A17  |
| 8076260 | 0,79 | 1,73 | 0,22919 | 3,02  | 8,13  | 0,00232 | NM_006358       | SET       |
| 7917674 | 0,79 | 1,73 | 0,53702 | 5,12  | 34,79 | 0,00008 | NM_001122821    | CDCA2     |
| 8145418 | 0,79 | 1,73 | 0,06451 | 2,13  | 4,37  | 0,00771 | NM_152562       | RBPJ      |
| 8155458 | 0,79 | 1,73 | 0,18872 | 0,81  | 1,75  | 0,04430 | D14041          | TSPAN2    |
| 7918857 | 0,79 | 1,73 | 0,02079 | 0,50  | 1,42  | 0,07405 | NM_005725       | ELMOD2    |
| 8097529 | 0,79 | 1,73 | 0,10475 | 1,59  | 3,01  | 0,01212 | NM_153702       | ARMCX3    |
| 8168875 | 0,79 | 1,73 | 0,06694 | 0,41  | 1,33  | 0,22650 | NM_016607       | KCNIP3    |
| 8043552 | 0,79 | 1,73 | 0,28919 | 0,84  | 1,80  | 0,06197 | NM_013434       | RDBP      |
| 8125204 | 0,79 | 1,73 | 0,04205 | 2,16  | 4,48  | 0,00392 | NM_002904       | RDBP      |
| 8178686 | 0,79 | 1,73 | 0,04205 | 2,16  | 4,48  | 0,00392 | NM_002904       | RDBP      |
| 8179913 | 0,79 | 1,73 | 0,04205 | 2,16  | 4,48  | 0,00392 | NM_002904       | OSR2      |
| 8147573 | 0,79 | 1,73 | 0,25666 | 0,14  | 1,10  | 0,67407 | NM_001142462    | HMG2      |
| 8000409 | 0,79 | 1,73 | 0,56793 | 0,40  | 1,32  | 0,44822 | NM_005517       | ARHGAP20  |
| 7951565 | 0,79 | 1,73 | 0,12159 | -1,02 | -2,03 | 0,00130 | NM_020809       | ZNF730    |
| 8027348 | 0,79 | 1,73 | 0,43217 | -1,27 | -2,41 | 0,05772 | ENST00000327867 | DPT       |
| 7922130 | 0,79 | 1,73 | 0,02152 | -1,78 | -3,44 | 0,03754 | NM_001937       | DOCK4     |
| 8142345 | 0,79 | 1,73 | 0,01259 | 2,01  | 4,02  | 0,00026 | NM_014705       | C14orf132 |
| 7976556 | 0,79 | 1,73 | 0,16097 | -0,61 | -1,53 | 0,01261 | NR_023938       | SAP30L    |
| 8109428 | 0,79 | 1,73 | 0,11422 | 1,97  | 3,92  | 0,00004 | NR_024084       | SNRPD3    |
| 8071920 | 0,79 | 1,73 | 0,09064 | 0,77  | 1,71  | 0,00568 | NM_004175       | TNS1      |
| 8058869 | 0,79 | 1,73 | 0,20067 | -0,91 | -1,88 | 0,00606 | NM_022648       | ---       |
| 8162260 | 0,79 | 1,73 | 0,32849 | 0,39  | 1,31  | 0,51971 | ---             | SLC41A1   |
| 7923824 | 0,79 | 1,73 | 0,04467 | 2,18  | 4,54  | 0,00574 | NM_173854       | NDNL2     |
| 7986969 | 0,79 | 1,72 | 0,03224 | -0,50 | -1,41 | 0,10180 | NM_138704       | HLA-L     |
| 8117861 | 0,79 | 1,72 | 0,15608 | 1,32  | 2,50  | 0,00932 | NR_027822       | HLA-L     |
| 8179080 | 0,79 | 1,72 | 0,15608 | 1,32  | 2,50  | 0,00932 | NR_027822       | RBM6      |
| 8079842 | 0,79 | 1,72 | 0,04020 | 1,81  | 3,52  | 0,01588 | NM_005777       | ACACA     |
| 8014487 | 0,79 | 1,72 | 0,04302 | 2,30  | 4,91  | 0,00132 | NM_198839       | HIF1AN    |
| 7929831 | 0,79 | 1,72 | 0,10292 | 1,63  | 3,09  | 0,00032 | NM_017902       | ZNF391    |
| 8117572 | 0,79 | 1,72 | 0,08504 | 1,05  | 2,08  | 0,04006 | NM_001076781    | AP1AR     |
| 8096905 | 0,78 | 1,72 | 0,05412 | 1,86  | 3,64  | 0,00198 | NM_018569       | ZFP3      |
| 8004081 | 0,78 | 1,72 | 0,08444 | 0,51  | 1,43  | 0,16591 | NM_153018       | RAPGEF6   |
| 8113881 | 0,78 | 1,72 | 0,09298 | 1,26  | 2,40  | 0,00517 | NM_001164386    | LYPLA2P1  |
| 8125748 | 0,78 | 1,72 | 0,13590 | 1,29  | 2,44  | 0,10825 | NR_001444       | SYAP1     |
| 8166219 | 0,78 | 1,72 | 0,04160 | 1,22  | 2,33  | 0,00016 | NM_032796       | SIRPA     |
| 8060418 | 0,78 | 1,72 | 0,06041 | 0,84  | 1,79  | 0,03091 | NM_001040022    | NDUFAB1   |
| 8000323 | 0,78 | 1,72 | 0,13879 | 1,92  | 3,80  | 0,00015 | NM_005003       | FMO2      |
| 7907271 | 0,78 | 1,72 | 0,01452 | -0,58 | -1,49 | 0,00066 | NM_001460       | ZFP64     |
| 8067094 | 0,78 | 1,72 | 0,08614 | 2,75  | 6,73  | 0,00081 | NM_199427       | CHN1      |
| 8056890 | 0,78 | 1,72 | 0,04569 | 1,76  | 3,40  | 0,01460 | NM_001822       | POLR2F    |
| 8072979 | 0,78 | 1,72 | 0,13786 | 1,64  | 3,12  | 0,04617 | NM_021974       | ZNF287    |
| 8013026 | 0,78 | 1,72 | 0,20011 | 0,54  | 1,46  | 0,10560 | NM_020653       | MSH3      |
| 8106633 | 0,78 | 1,72 | 0,09515 | 0,56  | 1,47  | 0,06319 | NM_002439       | UQCRC1    |
| 8087100 | 0,78 | 1,71 | 0,19978 | 1,84  | 3,57  | 0,00177 | NM_003365       | SGK196    |
| 8146278 | 0,78 | 1,71 | 0,32737 | 3,69  | 12,93 | 0,00001 | NM_032237       | WBP1      |
| 8043377 | 0,78 | 1,71 | 0,05962 | 2,78  | 6,85  | 0,00016 | NM_012477       | ZMYND19   |
| 8165622 | 0,78 | 1,71 | 0,23736 | 2,35  | 5,11  | 0,02779 | NM_138462       | ACVR1B    |

|         |      |      |         |       |        |         |              |          |
|---------|------|------|---------|-------|--------|---------|--------------|----------|
| 7955535 | 0,78 | 1,71 | 0,01570 | 1,19  | 2,28   | 0,00489 | NM_004302    | CPE      |
| 8098204 | 0,78 | 1,71 | 0,02619 | 0,92  | 1,89   | 0,00931 | NM_001873    | SP3      |
| 8056798 | 0,78 | 1,71 | 0,21535 | 2,62  | 6,13   | 0,00174 | NM_003111    | ADRBK1   |
| 7941797 | 0,78 | 1,71 | 0,07389 | 3,05  | 8,26   | 0,00240 | NM_001619    | RIMS1    |
| 8120613 | 0,77 | 1,71 | 0,02250 | -1,33 | -2,51  | 0,00467 | NM_014989    | BCL2L13  |
| 8071119 | 0,77 | 1,71 | 0,29132 | 2,82  | 7,07   | 0,00062 | NM_015367    | NRP2     |
| 8047738 | 0,77 | 1,71 | 0,19131 | -1,10 | -2,14  | 0,01413 | NM_201266    | RNF121   |
| 7942289 | 0,77 | 1,71 | 0,04365 | 0,85  | 1,81   | 0,04642 | NM_018320    | RAB9A    |
| 8166098 | 0,77 | 1,71 | 0,01902 | 1,44  | 2,71   | 0,01013 | NM_004251    | NUBPL    |
| 7973826 | 0,77 | 1,71 | 0,15666 | 1,94  | 3,84   | 0,01232 | NM_025152    | JAGN1    |
| 8077663 | 0,77 | 1,71 | 0,35508 | 3,20  | 9,21   | 0,00093 | NM_032492    | DOCK1    |
| 7931293 | 0,77 | 1,71 | 0,19771 | 2,58  | 5,96   | 0,00030 | NM_001380    | ---      |
| 8165676 | 0,77 | 1,71 | 0,18707 | -1,32 | -2,49  | 0,00252 | ---          | VRK2     |
| 8042086 | 0,77 | 1,71 | 0,13229 | 2,07  | 4,21   | 0,00128 | NM_006296    | CPZ      |
| 8094101 | 0,77 | 1,71 | 0,09631 | -1,04 | -2,05  | 0,02241 | NM_001014448 | C17orf71 |
| 8008795 | 0,77 | 1,71 | 0,12457 | 2,12  | 4,35   | 0,00549 | NM_018149    | ---      |
| 8123800 | 0,77 | 1,71 | 0,14791 | 0,74  | 1,67   | 0,07587 | ---          | ---      |
| 7932960 | 0,77 | 1,71 | 0,26335 | 0,13  | 1,09   | 0,78130 | ---          | ZNF608   |
| 8113761 | 0,77 | 1,71 | 0,28506 | -0,63 | -1,55  | 0,00271 | NM_020747    | ALS2CR8  |
| 8047577 | 0,77 | 1,71 | 0,00253 | -0,31 | -1,24  | 0,61599 | NM_024744    | MGC72080 |
| 8042574 | 0,77 | 1,71 | 0,48651 | 0,25  | 1,19   | 0,70015 | NR_002822    | BOC      |
| 8081686 | 0,77 | 1,71 | 0,07691 | -0,10 | -1,07  | 0,55291 | NM_033254    | SCN9A    |
| 8056491 | 0,77 | 1,71 | 0,00626 | 0,23  | 1,17   | 0,44450 | NM_002977    | MKS1     |
| 8016909 | 0,77 | 1,71 | 0,11650 | 1,68  | 3,21   | 0,00060 | NM_017777    | BRP44    |
| 7922095 | 0,77 | 1,70 | 0,03212 | 1,39  | 2,62   | 0,00045 | NR_026550    | FLJ44635 |
| 8168362 | 0,77 | 1,70 | 0,07043 | -0,08 | -1,06  | 0,77500 | NM_207422    | ARL17A   |
| 8007794 | 0,77 | 1,70 | 0,19580 | 1,32  | 2,50   | 0,05998 | NM_001113738 | PSMD12   |
| 8017810 | 0,77 | 1,70 | 0,05701 | 1,59  | 3,01   | 0,03223 | NM_002816    | CHRDL2   |
| 7950425 | 0,77 | 1,70 | 0,32730 | -0,93 | -1,90  | 0,08091 | NM_015424    | C1orf128 |
| 7898894 | 0,77 | 1,70 | 0,24984 | 1,82  | 3,53   | 0,00086 | NM_020362    | ZNF823   |
| 8034315 | 0,77 | 1,70 | 0,22745 | 1,18  | 2,27   | 0,04845 | NM_001080493 | SELENBP1 |
| 7919984 | 0,77 | 1,70 | 0,06141 | -0,90 | -1,86  | 0,09051 | NM_003944    | C16orf68 |
| 7993114 | 0,77 | 1,70 | 0,09212 | 0,96  | 1,94   | 0,00108 | NM_024109    | CINP     |
| 7981364 | 0,77 | 1,70 | 0,14840 | 1,29  | 2,44   | 0,00018 | NM_032630    | RPE      |
| 8048014 | 0,77 | 1,70 | 0,25227 | 0,80  | 1,74   | 0,02680 | NM_199229    | ---      |
| 8161444 | 0,77 | 1,70 | 0,65529 | -5,25 | -38,05 | 0,00190 | ---          | IL1A     |
| 8054712 | 0,77 | 1,70 | 0,22414 | -0,82 | -1,77  | 0,02102 | NM_000575    | ITSN1    |
| 8068305 | 0,76 | 1,70 | 0,03395 | 2,00  | 3,99   | 0,00002 | NM_003024    | SIX4     |
| 7979510 | 0,76 | 1,70 | 0,09858 | 0,15  | 1,11   | 0,51913 | NM_017420    | ---      |
| 7946565 | 0,76 | 1,70 | 0,07887 | -0,72 | -1,65  | 0,09870 | ---          | SPRYD3   |
| 7963577 | 0,76 | 1,70 | 0,12077 | 1,97  | 3,92   | 0,02662 | NM_032840    | TTF2     |
| 7904314 | 0,76 | 1,70 | 0,13975 | 1,95  | 3,86   | 0,00175 | NM_003594    | SMARCA2  |
| 8154059 | 0,76 | 1,70 | 0,06695 | 0,57  | 1,48   | 0,16371 | NM_003070    | ANP32A   |
| 7990020 | 0,76 | 1,70 | 0,03244 | 2,71  | 6,54   | 0,01402 | NM_006305    | FAM162B  |
| 8129120 | 0,76 | 1,70 | 0,04094 | -0,57 | -1,49  | 0,01083 | NM_001085480 | PEX2     |
| 8151436 | 0,76 | 1,70 | 0,21846 | 2,05  | 4,15   | 0,00151 | NM_000318    | ZNF592   |
| 7985605 | 0,76 | 1,70 | 0,40925 | 3,47  | 11,04  | 0,00004 | NM_014630    | ---      |
| 7949894 | 0,76 | 1,69 | 0,00872 | 0,25  | 1,19   | 0,09536 | ---          | ERMP1    |
| 8159992 | 0,76 | 1,69 | 0,11864 | 2,58  | 5,98   | 0,00071 | NM_024896    | PPIL6    |
| 8128726 | 0,76 | 1,69 | 0,29437 | 2,12  | 4,36   | 0,01344 | NM_173672    | PPIH     |
| 7900576 | 0,76 | 1,69 | 0,15689 | 1,49  | 2,82   | 0,16955 | NM_006347    | WDR3     |
| 7904364 | 0,76 | 1,69 | 0,17070 | 2,32  | 4,98   | 0,00021 | NM_006784    | EFTUD2   |
| 8016099 | 0,76 | 1,69 | 0,22793 | 3,36  | 10,28  | 0,00026 | NM_004247    | NBPF15   |
| 7919271 | 0,76 | 1,69 | 0,55305 | -0,07 | -1,05  | 0,82564 | NM_173638    | TRAPPC6B |
| 7978739 | 0,76 | 1,69 | 0,17139 | 2,78  | 6,86   | 0,00026 | NM_001079537 | EPAG     |
| 8173930 | 0,76 | 1,69 | 0,01198 | -0,64 | -1,56  | 0,01272 | L22650 DNPEP |          |
| 8059222 | 0,76 | 1,69 | 0,26447 | 1,48  | 2,79   | 0,00080 | NM_012100    | MAGI2    |
| 8140504 | 0,75 | 1,69 | 0,21109 | -0,87 | -1,83  | 0,04483 | NM_012301    | MYO9B    |
| 8026638 | 0,75 | 1,69 | 0,01167 | 1,47  | 2,77   | 0,04784 | NM_004145    | BRD7     |
| 8083704 | 0,75 | 1,69 | 0,28470 | 1,32  | 2,50   | 0,09380 | NM_001173984 | ---      |
| 7934531 | 0,75 | 1,69 | 0,17059 | 0,76  | 1,70   | 0,02652 | ---          | MLF2     |
| 7960689 | 0,75 | 1,69 | 0,26734 | 3,24  | 9,45   | 0,00858 | NR_026581    | TAPBP    |
| 8125713 | 0,75 | 1,69 | 0,01685 | 0,84  | 1,79   | 0,05557 | NM_003190    | EXOC7    |
| 8018620 | 0,75 | 1,69 | 0,02318 | 2,10  | 4,30   | 0,00833 | NM_001145297 | COG2     |
| 7910446 | 0,75 | 1,69 | 0,20064 | 2,17  | 4,50   | 0,00233 | NM_007357    | DENND2C  |
| 7918768 | 0,75 | 1,69 | 0,11056 | 0,54  | 1,45   | 0,01112 | NM_198459    | ZNF280D  |
| 7989159 | 0,75 | 1,68 | 0,12031 | 1,24  | 2,36   | 0,02043 | NM_017661    | SPOP     |
| 8016562 | 0,75 | 1,68 | 0,01916 | 1,28  | 2,42   | 0,00189 | NM_001007230 | SMG6     |
| 8011222 | 0,75 | 1,68 | 0,00210 | 1,04  | 2,05   | 0,01705 | NM_017575    | BTN3A2   |
| 8117435 | 0,75 | 1,68 | 0,39368 | 1,38  | 2,60   | 0,00283 | NM_007047    | KIF23    |
| 7984540 | 0,75 | 1,68 | 0,11629 | 2,55  | 5,85   | 0,00235 | NM_138555    | NAPG     |
| 8020149 | 0,75 | 1,68 | 0,15128 | 2,22  | 4,66   | 0,00024 | NM_003826    | RPS2     |
| 8172154 | 0,75 | 1,68 | 0,28135 | 0,98  | 1,98   | 0,01757 | NM_002952    | MYO1C    |



|         |      |      |         |       |       |         |              |              |
|---------|------|------|---------|-------|-------|---------|--------------|--------------|
| 8011027 | 0,75 | 1,68 | 0,19819 | 3,25  | 9,52  | 0,00270 | NM_001080779 | ---          |
| 8112916 | 0,75 | 1,68 | 0,07079 | -0,74 | -1,67 | 0,09488 | ---          | ---          |
| 8174970 | 0,75 | 1,68 | 0,07079 | -0,74 | -1,67 | 0,09488 | ---          | CYFIP2       |
| 8109528 | 0,75 | 1,68 | 0,26094 | 1,66  | 3,16  | 0,01227 | NM_001037332 | ATG16L1      |
| 8049271 | 0,75 | 1,68 | 0,09685 | 2,37  | 5,16  | 0,00073 | NM_030803    | FAHD2B       |
| 8054045 | 0,75 | 1,68 | 0,17202 | 2,42  | 5,36  | 0,00047 | NM_199336    | ARMCX5       |
| 8168958 | 0,75 | 1,68 | 0,04436 | 1,93  | 3,80  | 0,00271 | NM_001168479 | B4GALT2      |
| 7900931 | 0,75 | 1,68 | 0,02588 | 1,48  | 2,80  | 0,03303 | NM_003780    | APOBEC3F     |
| 8073081 | 0,75 | 1,68 | 0,02009 | 1,48  | 2,78  | 0,00824 | NM_145298    | APOA1BP      |
| 7906185 | 0,75 | 1,68 | 0,29913 | 3,64  | 12,48 | 0,00001 | NM_144772    | ZNF449       |
| 8170015 | 0,75 | 1,68 | 0,30023 | 1,36  | 2,56  | 0,00435 | NM_152695    | B3GALNT1     |
| 8091780 | 0,75 | 1,68 | 0,03345 | 1,35  | 2,56  | 0,08554 | NM_001038628 | NBPF15       |
| 7919351 | 0,75 | 1,68 | 0,55949 | -0,06 | -1,04 | 0,83973 | NM_173638    | GPR1         |
| 8058450 | 0,75 | 1,68 | 0,11301 | -0,44 | -1,36 | 0,12216 | NM_005279    | PDE3B        |
| 7938629 | 0,75 | 1,68 | 0,19375 | 1,81  | 3,51  | 0,02517 | NM_000922    | TTC7B        |
| 7980720 | 0,74 | 1,68 | 0,26154 | 2,55  | 5,84  | 0,00204 | NM_001010854 | ZNF224       |
| 8029377 | 0,74 | 1,68 | 0,31749 | 1,35  | 2,56  | 0,00268 | NM_013398    | SLC33A1      |
| 8091637 | 0,74 | 1,68 | 0,26584 | 3,03  | 8,17  | 0,00206 | NM_004733    | ANKRD52      |
| 7964033 | 0,74 | 1,67 | 0,17911 | 2,61  | 6,10  | 0,00109 | NM_173595    | LOC100132288 |
| 8177120 | 0,74 | 1,67 | 0,07758 | 1,27  | 2,41  | 0,00548 | NM_001033515 | TMEM109      |
| 7940372 | 0,74 | 1,67 | 0,00557 | 2,87  | 7,31  | 0,04628 | NM_024092    | ---          |
| 8058411 | 0,74 | 1,67 | 0,09608 | -0,19 | -1,14 | 0,68934 | ---          | CPSF3L       |
| 7911486 | 0,74 | 1,67 | 0,17774 | 2,55  | 5,87  | 0,00083 | NM_017871    | DHCR7        |
| 7950067 | 0,74 | 1,67 | 0,07617 | 3,46  | 11,03 | 0,00071 | NM_001360    | STRBP        |
| 8164013 | 0,74 | 1,67 | 0,10193 | 4,03  | 16,38 | 0,00014 | NM_001171137 | PARL         |
| 8092409 | 0,74 | 1,67 | 0,07430 | 1,30  | 2,47  | 0,11078 | NM_018622    | KCTD5        |
| 7992685 | 0,74 | 1,67 | 0,07290 | 1,55  | 2,92  | 0,00392 | NM_018992    | RNF207       |
| 7897263 | 0,74 | 1,67 | 0,09441 | 0,15  | 1,11  | 0,70829 | NM_207396    | PDXDC2       |
| 7994559 | 0,74 | 1,67 | 0,31050 | 1,60  | 3,04  | 0,01577 | NR_003610    | TCIRG1       |
| 7941985 | 0,74 | 1,67 | 0,08933 | 2,14  | 4,40  | 0,01031 | NM_006019    | KDM4C        |
| 8154333 | 0,74 | 1,67 | 0,06858 | 1,54  | 2,91  | 0,00009 | NM_015061    | TEX2         |
| 8017582 | 0,74 | 1,67 | 0,06169 | 1,91  | 3,75  | 0,00192 | NM_018469    | POLR2A       |
| 8004431 | 0,74 | 1,67 | 0,05070 | 2,52  | 5,73  | 0,00177 | NM_000937    | NDN          |
| 7986757 | 0,74 | 1,67 | 0,24099 | -1,13 | -2,19 | 0,07758 | NM_002487    | FAM20C       |
| 8130993 | 0,74 | 1,67 | 0,03184 | 1,55  | 2,93  | 0,04660 | NM_020223    | APBB1        |
| 7946149 | 0,74 | 1,67 | 0,08601 | 0,32  | 1,25  | 0,39929 | NM_001164    | KIF3B        |
| 8061715 | 0,74 | 1,67 | 0,01329 | 0,94  | 1,91  | 0,10987 | NM_004798    | PHC1         |
| 7963869 | 0,74 | 1,67 | 0,15772 | 2,32  | 4,98  | 0,00004 | NM_004426    | IFT46        |
| 7952069 | 0,74 | 1,67 | 0,20402 | 1,56  | 2,95  | 0,00983 | NM_020153    | AP4B1        |
| 7918703 | 0,74 | 1,67 | 0,07348 | 1,00  | 1,99  | 0,09023 | NM_006594    | BRI3         |
| 8134454 | 0,74 | 1,67 | 0,18622 | -0,15 | -1,11 | 0,68811 | NM_015379    | SLC1A5       |
| 8037835 | 0,74 | 1,67 | 0,05219 | 2,26  | 4,78  | 0,03416 | NM_005628    | PAG1         |
| 8151512 | 0,74 | 1,67 | 0,19116 | 0,63  | 1,54  | 0,18793 | NM_018440    | SLC46A3      |
| 7970793 | 0,74 | 1,67 | 0,12336 | 2,76  | 6,79  | 0,00122 | NM_181785    | 14. Sep      |
| 7998117 | 0,74 | 1,66 | 0,46510 | 0,93  | 1,91  | 0,60005 | NM_207366    | ---          |
| 8053761 | 0,73 | 1,66 | 0,06239 | 0,67  | 1,59  | 0,00494 | ---          | EBF3         |
| 7937039 | 0,73 | 1,66 | 0,22174 | -1,08 | -2,11 | 0,02196 | NM_001005463 | PMF1         |
| 7906133 | 0,73 | 1,66 | 0,05655 | 2,63  | 6,21  | 0,00219 | NM_007221    | ERCC5        |
| 7969935 | 0,73 | 1,66 | 0,03606 | 0,94  | 1,92  | 0,00412 | NM_000123    | TUBGCP3      |
| 7972840 | 0,73 | 1,66 | 0,12657 | 2,45  | 5,48  | 0,00023 | NM_006322    | TNXB         |
| 8178712 | 0,73 | 1,66 | 0,13067 | 0,41  | 1,32  | 0,29535 | NM_032470    | TNXB         |
| 8179935 | 0,73 | 1,66 | 0,13067 | 0,41  | 1,32  | 0,29535 | NM_032470    | MX1          |
| 8068713 | 0,73 | 1,66 | 0,10706 | -0,26 | -1,20 | 0,05958 | NM_002462    | CCDC66       |
| 8080621 | 0,73 | 1,66 | 0,12284 | 0,55  | 1,47  | 0,41453 | NR_024460    | ZNF706       |
| 8152111 | 0,73 | 1,66 | 0,04639 | 1,85  | 3,61  | 0,02989 | NM_001042510 | SLC16A14     |
| 8059642 | 0,73 | 1,66 | 0,12621 | 0,62  | 1,54  | 0,02517 | NM_152527    | RMRP         |
| 8161024 | 0,73 | 1,66 | 0,14597 | -1,20 | -2,29 | 0,04174 | NR_003051    | GLRX2        |
| 7923027 | 0,73 | 1,66 | 0,06871 | 0,43  | 1,35  | 0,16678 | NM_197962    | PRKACA       |
| 8034762 | 0,73 | 1,66 | 0,09650 | 1,98  | 3,95  | 0,00088 | NM_002730    | KCNQ5        |
| 8120654 | 0,73 | 1,66 | 0,07137 | 1,41  | 2,65  | 0,00068 | NM_001160133 | TPST2        |
| 8075106 | 0,73 | 1,66 | 0,00982 | 0,54  | 1,46  | 0,08125 | NM_003595    | ANAPC4       |
| 8094408 | 0,73 | 1,66 | 0,05498 | 2,87  | 7,31  | 0,00264 | NM_013367    | MPP7         |
| 7932765 | 0,73 | 1,66 | 0,00943 | 2,36  | 5,13  | 0,00018 | NM_173496    | ZNF227       |
| 8029413 | 0,73 | 1,66 | 0,10028 | 0,13  | 1,09  | 0,40113 | NM_182490    | NCAPG        |
| 8094278 | 0,73 | 1,66 | 0,01590 | 2,32  | 4,98  | 0,00067 | NM_022346    | CEP290       |
| 7965264 | 0,73 | 1,66 | 0,13878 | 0,57  | 1,49  | 0,09418 | NM_025114    | LYRM2        |
| 8128133 | 0,73 | 1,66 | 0,38491 | 0,22  | 1,16  | 0,35727 | NM_020466    | PCDH87       |
| 8108708 | 0,73 | 1,66 | 0,05281 | -0,42 | -1,34 | 0,09298 | NM_018940    | SEMA4C       |
| 8054004 | 0,73 | 1,66 | 0,09426 | 2,59  | 6,04  | 0,00449 | NM_017789    | NDUFB3       |
| 8047372 | 0,73 | 1,66 | 0,21133 | 1,01  | 2,01  | 0,05336 | NM_002491    | CCDC125      |
| 8112439 | 0,73 | 1,66 | 0,06849 | 0,88  | 1,84  | 0,04225 | NM_176816    | CCDC125      |
| 8177628 | 0,73 | 1,66 | 0,24832 | 1,26  | 2,40  | 0,00386 | NM_176816    | UBE2I        |
| 7992205 | 0,73 | 1,66 | 0,02940 | 1,52  | 2,87  | 0,00695 | NM_194259    | ANUB11       |

|         |      |      |         |       |       |         |              |              |
|---------|------|------|---------|-------|-------|---------|--------------|--------------|
| 7933237 | 0,73 | 1,66 | 0,15242 | 1,46  | 2,75  | 0,03089 | NM_174890    | ---          |
| 7924758 | 0,73 | 1,66 | 0,21767 | 0,91  | 1,89  | 0,28103 | ---          | SKIL         |
| 8083876 | 0,73 | 1,66 | 0,11978 | 0,94  | 1,91  | 0,00322 | NM_005414    | NBR2         |
| 8007462 | 0,73 | 1,66 | 0,10052 | 2,36  | 5,12  | 0,00169 | NR_003108    | LOC100129033 |
| 8116722 | 0,73 | 1,65 | 0,13819 | 1,27  | 2,40  | 0,06475 | AY358807     | TCERG1       |
| 8108954 | 0,73 | 1,65 | 0,17093 | 2,95  | 7,75  | 0,00001 | NM_006706    | HMGB1        |
| 7970858 | 0,72 | 1,65 | 0,07960 | 0,96  | 1,94  | 0,05643 | NM_002128    | KDM5A        |
| 7960221 | 0,72 | 1,65 | 0,01921 | 1,52  | 2,87  | 0,00017 | NM_001042603 | MEMO1        |
| 8051372 | 0,72 | 1,65 | 0,13727 | 0,85  | 1,81  | 0,00995 | NM_015955    | TXNDC9       |
| 8100519 | 0,72 | 1,65 | 0,23452 | 0,69  | 1,61  | 0,13037 | NM_005783    | PLIN3        |
| 8032909 | 0,72 | 1,65 | 0,15080 | 2,14  | 4,39  | 0,00483 | NM_005817    | PPIP5K1      |
| 7988124 | 0,72 | 1,65 | 0,36611 | 1,66  | 3,15  | 0,00047 | NM_014659    | SLC39A13     |
| 7939805 | 0,72 | 1,65 | 0,02385 | 1,89  | 3,70  | 0,03729 | NM_001128225 | CRYZL1       |
| 8070141 | 0,72 | 1,65 | 0,00194 | 1,65  | 3,13  | 0,02448 | NM_145858    | LSAMP        |
| 8089714 | 0,72 | 1,65 | 0,23122 | -1,83 | -3,55 | 0,02376 | NM_002338    | LYRM5        |
| 7954460 | 0,72 | 1,65 | 0,15816 | 1,36  | 2,58  | 0,02531 | NM_001001660 | RALBP1       |
| 8020100 | 0,72 | 1,65 | 0,03701 | 2,50  | 5,67  | 0,00144 | NM_006788    | CCDC58       |
| 8089988 | 0,72 | 1,65 | 0,21420 | 1,53  | 2,89  | 0,05270 | NM_001017928 | TUBB2A       |
| 8116649 | 0,72 | 1,65 | 0,59680 | -1,55 | -2,93 | 0,02273 | NM_001069    | TUBB2A       |
| 8116653 | 0,72 | 1,65 | 0,59680 | -1,55 | -2,93 | 0,02273 | NM_001069    | PTPN21       |
| 7980616 | 0,72 | 1,65 | 0,12531 | 2,50  | 5,64  | 0,00428 | NM_007039    | DEPDC6       |
| 8148059 | 0,72 | 1,65 | 0,21021 | 0,79  | 1,73  | 0,08869 | NM_022783    | LEPRE1       |
| 7915444 | 0,72 | 1,65 | 0,23122 | 0,47  | 1,38  | 0,20625 | NM_022356    | FZD4         |
| 7950885 | 0,72 | 1,65 | 0,08962 | -0,33 | -1,26 | 0,33502 | NM_012193    | SYF2         |
| 7913814 | 0,72 | 1,65 | 0,10254 | 0,54  | 1,45  | 0,11597 | NM_015484    | AVL9         |
| 8132188 | 0,72 | 1,65 | 0,10669 | 2,74  | 6,69  | 0,00297 | NM_015060    | JARID2       |
| 8116998 | 0,72 | 1,65 | 0,22878 | 2,92  | 7,55  | 0,00018 | NM_004973    | APC          |
| 8107330 | 0,72 | 1,65 | 0,15130 | 0,75  | 1,68  | 0,03355 | NM_001127511 | NAA16        |
| 7968761 | 0,72 | 1,65 | 0,04479 | 2,08  | 4,23  | 0,00428 | NM_024561    | OSCP1        |
| 7914923 | 0,72 | 1,65 | 0,28589 | -0,26 | -1,20 | 0,59602 | NM_145047    | PRIM1        |
| 7964271 | 0,72 | 1,65 | 0,19217 | 4,27  | 19,33 | 0,00091 | NM_000946    | C17orf65     |
| 8015946 | 0,72 | 1,64 | 0,08302 | 2,16  | 4,47  | 0,00148 | NM_178542    | EEF1B2       |
| 8047771 | 0,72 | 1,64 | 0,27695 | 0,71  | 1,63  | 0,19193 | NM_001959    | PMS2L3       |
| 8140311 | 0,72 | 1,64 | 0,49658 | 1,50  | 2,82  | 0,24405 | NR_028059    | HIST1H4K     |
| 8124521 | 0,72 | 1,64 | 0,05594 | 2,03  | 4,09  | 0,00124 | NM_003541    | ADARB1       |
| 8069178 | 0,72 | 1,64 | 0,06291 | 1,16  | 2,23  | 0,02626 | NR_027673    | LOC388692    |
| 7905058 | 0,72 | 1,64 | 0,49287 | -0,21 | -1,16 | 0,72923 | NR_027002    | YAF2         |
| 7962358 | 0,72 | 1,64 | 0,01768 | 0,49  | 1,40  | 0,20183 | NM_005748    | RAD51        |
| 7982792 | 0,72 | 1,64 | 0,10907 | 3,20  | 9,19  | 0,00050 | NM_002875    | APOD         |
| 8092970 | 0,72 | 1,64 | 0,14300 | -1,43 | -2,70 | 0,01777 | NM_001647    | AHCY         |
| 8065738 | 0,72 | 1,64 | 0,12750 | 2,69  | 6,44  | 0,01564 | NM_000687    | NR2F2        |
| 7986329 | 0,72 | 1,64 | 0,05617 | -0,02 | -1,02 | 0,91869 | NM_021005    | ITGA6        |
| 8046380 | 0,71 | 1,64 | 0,12932 | 3,32  | 10,02 | 0,00038 | NM_000210    | RFC5         |
| 7959052 | 0,71 | 1,64 | 0,04052 | 2,86  | 7,26  | 0,00040 | NM_181578    | CNST         |
| 7911138 | 0,71 | 1,64 | 0,06874 | 0,77  | 1,70  | 0,01711 | NM_152609    | KIF16B       |
| 8065089 | 0,71 | 1,64 | 0,17046 | 1,18  | 2,26  | 0,00293 | NM_024704    | STC1         |
| 8149825 | 0,71 | 1,64 | 0,01114 | 0,34  | 1,27  | 0,10334 | NM_003155    | ELK4         |
| 7923778 | 0,71 | 1,64 | 0,05062 | 0,48  | 1,40  | 0,13359 | NM_001973    | HSD17B7      |
| 7906904 | 0,71 | 1,64 | 0,15697 | 1,74  | 3,35  | 0,00044 | NM_016371    | ZFYVE20      |
| 8085537 | 0,71 | 1,64 | 0,10690 | 1,17  | 2,26  | 0,01795 | NM_022340    | MCM9         |
| 8129214 | 0,71 | 1,64 | 0,18533 | 2,65  | 6,28  | 0,00054 | AK299076     | PARG         |
| 7933561 | 0,71 | 1,64 | 0,04022 | 1,91  | 3,75  | 0,03677 | NM_003631    | BCKDK        |
| 7995040 | 0,71 | 1,64 | 0,10241 | 2,24  | 4,74  | 0,00314 | NM_001122957 | LRRC23       |
| 7953520 | 0,71 | 1,64 | 0,02768 | 0,49  | 1,41  | 0,44191 | NM_201650    | SYNCRIP      |
| 8127977 | 0,71 | 1,64 | 0,46877 | 0,96  | 1,94  | 0,12886 | NM_001159677 | P4HA3        |
| 7950374 | 0,71 | 1,64 | 0,14788 | -0,22 | -1,17 | 0,16497 | NM_182904    | SLC23A2      |
| 8064808 | 0,71 | 1,64 | 0,06342 | 2,65  | 6,27  | 0,00357 | NM_005116    | TRIP4        |
| 7984190 | 0,71 | 1,63 | 0,23474 | 2,82  | 7,08  | 0,00009 | NM_016213    | L3MBTL3      |
| 8122013 | 0,71 | 1,63 | 0,22201 | 1,14  | 2,20  | 0,01421 | NM_032438    | H2AFY2       |
| 7928107 | 0,71 | 1,63 | 0,06078 | 2,07  | 4,19  | 0,01447 | NM_018649    | TIMM44       |
| 8033465 | 0,71 | 1,63 | 0,10402 | 2,09  | 4,26  | 0,01095 | NM_006351    | PI4K2A       |
| 7929677 | 0,71 | 1,63 | 0,11126 | 2,19  | 4,57  | 0,00236 | NM_018425    | PRKCA        |
| 8009301 | 0,71 | 1,63 | 0,11295 | 3,63  | 12,37 | 0,00002 | NM_002737    | SERINC2      |
| 7899615 | 0,71 | 1,63 | 0,09875 | 1,25  | 2,37  | 0,11588 | NM_178865    | LOXL1        |
| 7984771 | 0,71 | 1,63 | 0,26365 | -0,64 | -1,56 | 0,14215 | NM_005576    | C14orf149    |
| 7979437 | 0,71 | 1,63 | 0,07747 | 2,38  | 5,21  | 0,00114 | NM_144581    | F8A1         |
| 8176245 | 0,71 | 1,63 | 0,09636 | 1,38  | 2,60  | 0,00834 | NM_012151    | TBC1D25      |
| 8167314 | 0,71 | 1,63 | 0,02618 | 1,73  | 3,32  | 0,03616 | NM_002536    | DGKA         |
| 7956046 | 0,71 | 1,63 | 0,38212 | 2,22  | 4,67  | 0,00411 | NM_201444    | PAQR5        |
| 7984524 | 0,71 | 1,63 | 0,01237 | 1,49  | 2,81  | 0,00663 | NM_001104554 | EIF2C2       |
| 8153201 | 0,71 | 1,63 | 0,31171 | 1,85  | 3,60  | 0,02057 | NM_012154    | NUMA1        |
| 7950086 | 0,71 | 1,63 | 0,20453 | 1,90  | 3,74  | 0,01901 | NM_006185    | ZNF177       |
| 8025488 | 0,71 | 1,63 | 0,02762 | 0,66  | 1,58  | 0,13628 | NM_003451    | PCDHB9       |

|         |      |      |         |       |       |         |                 |            |
|---------|------|------|---------|-------|-------|---------|-----------------|------------|
| 8108720 | 0,71 | 1,63 | 0,11044 | 0,02  | 1,01  | 0,92664 | NM_019119       | EZH2       |
| 8143663 | 0,70 | 1,63 | 0,30502 | 3,68  | 12,79 | 0,00014 | NM_004456       | BTBD2      |
| 8032380 | 0,70 | 1,63 | 0,09018 | 3,19  | 9,13  | 0,00690 | NM_017797       | DNAJA3     |
| 7992973 | 0,70 | 1,63 | 0,02715 | 2,57  | 5,94  | 0,00056 | NM_005147       | DCLK2      |
| 8097753 | 0,70 | 1,63 | 0,18071 | 0,02  | 1,01  | 0,94913 | NM_001040260    | ZNF624     |
| 8013035 | 0,70 | 1,63 | 0,14763 | -0,64 | -1,56 | 0,27483 | NM_020787       | DOPEY2     |
| 8068422 | 0,70 | 1,63 | 0,03780 | 2,30  | 4,91  | 0,00048 | NM_005128       | WDR25      |
| 7976766 | 0,70 | 1,63 | 0,00923 | 0,56  | 1,47  | 0,21847 | NM_024515       | PCIF1      |
| 8063097 | 0,70 | 1,62 | 0,13242 | 3,08  | 8,46  | 0,00472 | NM_022104       | CSGALNACT1 |
| 8149574 | 0,70 | 1,62 | 0,30516 | 2,57  | 5,94  | 0,01319 | NM_018371       | ZCCHC4     |
| 8094393 | 0,70 | 1,62 | 0,23812 | 2,53  | 5,79  | 0,00185 | NM_024936       | CASC5      |
| 7982757 | 0,70 | 1,62 | 0,06560 | 1,31  | 2,48  | 0,14875 | NM_170589       | RPP38      |
| 7926345 | 0,70 | 1,62 | 0,04087 | 3,32  | 9,98  | 0,00061 | NM_183005       | AMN1       |
| 7962185 | 0,70 | 1,62 | 0,22162 | 1,77  | 3,41  | 0,01269 | NM_001113402    | PDCD2      |
| 8130962 | 0,70 | 1,62 | 0,18927 | 0,89  | 1,86  | 0,06030 | NM_002598       | ID1        |
| 8061564 | 0,70 | 1,62 | 0,15495 | 2,78  | 6,85  | 0,00083 | NM_181353       | PLEKHA3    |
| 8046680 | 0,70 | 1,62 | 0,38467 | 0,26  | 1,20  | 0,59309 | NM_019091       | BDKRB2     |
| 7976560 | 0,70 | 1,62 | 0,34142 | -1,35 | -2,55 | 0,00073 | NM_000623       | ANKRD39    |
| 8053998 | 0,70 | 1,62 | 0,38942 | 1,24  | 2,37  | 0,01926 | NM_016466       | TP1P2      |
| 8136061 | 0,70 | 1,62 | 0,28680 | 1,14  | 2,20  | 0,02120 | NR_002187       | RELN       |
| 8141950 | 0,70 | 1,62 | 0,00456 | -1,04 | -2,05 | 0,00139 | NM_005045       | LOC729992  |
| 8040362 | 0,70 | 1,62 | 0,10398 | 0,45  | 1,37  | 0,21888 | XR_038318       | EXOSC3     |
| 8161242 | 0,70 | 1,62 | 0,16259 | 1,35  | 2,54  | 0,04353 | NM_016042       | TET1       |
| 7927876 | 0,70 | 1,62 | 0,28426 | 2,31  | 4,95  | 0,00288 | NM_030625       | EPHA2      |
| 7912706 | 0,69 | 1,62 | 0,04759 | 3,06  | 8,36  | 0,00006 | NM_004431       | ATAD2      |
| 8152668 | 0,69 | 1,62 | 0,06116 | 2,18  | 4,52  | 0,01110 | NM_014109       | ---        |
| 7982269 | 0,69 | 1,62 | 0,65555 | -2,56 | -5,88 | 0,01252 | ---             | ---        |
| 7987025 | 0,69 | 1,62 | 0,65555 | -2,56 | -5,88 | 0,01252 | ---             | TMCO7      |
| 7996860 | 0,69 | 1,62 | 0,30588 | 1,77  | 3,41  | 0,00021 | NM_024562       | DDAH2      |
| 8178590 | 0,69 | 1,62 | 0,12551 | 0,75  | 1,69  | 0,13582 | NM_013974       | DDAH2      |
| 8179819 | 0,69 | 1,62 | 0,12551 | 0,75  | 1,69  | 0,13582 | NM_013974       | NKAP       |
| 8174737 | 0,69 | 1,62 | 0,06896 | 0,55  | 1,46  | 0,12061 | NM_024528       | SLC25A37   |
| 8145291 | 0,69 | 1,62 | 0,25618 | 4,06  | 16,66 | 0,00027 | AF495725        | KLHL2      |
| 8098177 | 0,69 | 1,62 | 0,11984 | 1,92  | 3,79  | 0,00490 | NM_007246       | ---        |
| 8002711 | 0,69 | 1,62 | 0,25874 | 1,67  | 3,18  | 0,00191 | ---             | BSDC1      |
| 7914530 | 0,69 | 1,62 | 0,18968 | 1,32  | 2,50  | 0,01303 | NM_001143888    | STK36      |
| 8048381 | 0,69 | 1,61 | 0,16162 | 1,22  | 2,33  | 0,00073 | NM_015690       | PIK3IP1    |
| 8075483 | 0,69 | 1,61 | 0,13602 | -1,03 | -2,04 | 0,05146 | NM_052880       | OLFML3     |
| 7904158 | 0,69 | 1,61 | 0,17180 | -1,89 | -3,71 | 0,00540 | NM_020190       | DIRAS2     |
| 8162254 | 0,69 | 1,61 | 0,05094 | -0,75 | -1,68 | 0,02889 | NM_017594       | ZNF470     |
| 8031669 | 0,69 | 1,61 | 0,15722 | 0,13  | 1,09  | 0,78486 | NM_001001668    | UTY        |
| 8177137 | 0,69 | 1,61 | 0,13634 | 2,29  | 4,89  | 0,00030 | NM_007125       | DGKH       |
| 7968800 | 0,69 | 1,61 | 0,26679 | 2,90  | 7,46  | 0,00008 | NM_178009       | DOCK9      |
| 7972487 | 0,69 | 1,61 | 0,05870 | 3,05  | 8,28  | 0,00019 | NM_015296       | HSPA12A    |
| 7936516 | 0,69 | 1,61 | 0,02768 | 0,60  | 1,51  | 0,09751 | NM_025015       | PGPEP1     |
| 8026991 | 0,69 | 1,61 | 0,05440 | 0,42  | 1,34  | 0,09844 | NM_017712       | POLDIP3    |
| 8076465 | 0,69 | 1,61 | 0,00666 | 2,11  | 4,33  | 0,00231 | NM_032311       | NUP35      |
| 8046804 | 0,69 | 1,61 | 0,06849 | 1,75  | 3,36  | 0,00087 | NM_138285       | ---        |
| 8052438 | 0,69 | 1,61 | 0,00929 | 1,73  | 3,32  | 0,00316 | ---             | RAD17      |
| 8105878 | 0,69 | 1,61 | 0,20675 | 2,01  | 4,04  | 0,00979 | NM_133338       | GABPB2     |
| 7905339 | 0,69 | 1,61 | 0,15844 | 2,10  | 4,29  | 0,00177 | NM_144618       | WDHD1      |
| 7979281 | 0,69 | 1,61 | 0,20101 | 2,84  | 7,14  | 0,00255 | NM_007086       | ANKRD36    |
| 8053801 | 0,69 | 1,61 | 0,24719 | 1,16  | 2,24  | 0,06038 | NM_001164315    | ---        |
| 8043375 | 0,68 | 1,61 | 0,64760 | -3,14 | -8,83 | 0,00244 | ---             | ---        |
| 8097827 | 0,68 | 1,61 | 0,20531 | 0,43  | 1,34  | 0,23426 | ---             | INVS       |
| 8156873 | 0,68 | 1,61 | 0,01567 | 2,10  | 4,30  | 0,00078 | NM_014425       | ---        |
| 8133856 | 0,68 | 1,61 | 0,46460 | -0,37 | -1,29 | 0,49157 | ---             | KGFLP2     |
| 8155530 | 0,68 | 1,60 | 0,09068 | 0,09  | 1,07  | 0,78841 | NR_003670       | PPM1D      |
| 8008922 | 0,68 | 1,60 | 0,07229 | 1,39  | 2,63  | 0,01292 | NM_003620       | TMEM101    |
| 8015900 | 0,68 | 1,60 | 0,37148 | 2,01  | 4,04  | 0,00027 | NM_032376       | KIAA0913   |
| 7928411 | 0,68 | 1,60 | 0,21030 | 1,45  | 2,73  | 0,00690 | NM_015037       | MDM4       |
| 7909011 | 0,68 | 1,60 | 0,29605 | 2,32  | 5,01  | 0,00217 | NM_002393       | ZNF350     |
| 8038919 | 0,68 | 1,60 | 0,24479 | 0,58  | 1,50  | 0,07690 | NM_021632       | NIT1       |
| 7906652 | 0,68 | 1,60 | 0,09778 | 2,39  | 5,24  | 0,00051 | NM_005600       | TMEM5      |
| 7956749 | 0,68 | 1,60 | 0,07346 | 1,64  | 3,11  | 0,01056 | NM_014254       | REL        |
| 8042144 | 0,68 | 1,60 | 0,34379 | 1,57  | 2,98  | 0,00002 | NM_002908       | CEBPB      |
| 8063386 | 0,68 | 1,60 | 0,21192 | 1,29  | 2,44  | 0,15217 | NM_005194       | C14orf167  |
| 7973446 | 0,68 | 1,60 | 0,09376 | -0,54 | -1,45 | 0,25753 | ENST00000354854 | MAN2B1     |
| 8034420 | 0,68 | 1,60 | 0,05037 | 1,55  | 2,94  | 0,02243 | NM_000528       | C19orf61   |
| 8037389 | 0,68 | 1,60 | 0,06162 | 1,31  | 2,48  | 0,00090 | NM_019108       | BANF1      |
| 7941501 | 0,68 | 1,60 | 0,39206 | -0,52 | -1,43 | 0,13938 | NM_003860       | TRIAP1     |
| 7967056 | 0,67 | 1,60 | 0,11224 | 1,05  | 2,07  | 0,02058 | NM_016399       | BECN1      |
| 8015715 | 0,67 | 1,60 | 0,30894 | 1,97  | 3,91  | 0,00322 | NM_003766       | DCPS       |

|         |      |      |         |       |       |         |                 |          |
|---------|------|------|---------|-------|-------|---------|-----------------|----------|
| 7945101 | 0,67 | 1,60 | 0,21423 | 2,16  | 4,47  | 0,00011 | NM_014026       | LRRFIP1  |
| 8049528 | 0,67 | 1,60 | 0,37857 | 0,10  | 1,07  | 0,85749 | NM_001137550    | ZCCHC17  |
| 7899604 | 0,67 | 1,59 | 0,08421 | 0,89  | 1,86  | 0,01576 | NM_016505       | WHAMM    |
| 7985482 | 0,67 | 1,59 | 0,08545 | 1,35  | 2,55  | 0,02823 | NM_001080435    | PDCD10   |
| 8091941 | 0,67 | 1,59 | 0,10987 | 1,08  | 2,11  | 0,00695 | NM_007217       | TTC12    |
| 7943919 | 0,67 | 1,59 | 0,12252 | 0,52  | 1,43  | 0,02449 | NM_017868       | RPS29    |
| 7978824 | 0,67 | 1,59 | 0,06897 | 1,84  | 3,59  | 0,00068 | NM_001030001    | TPRG1L   |
| 7897172 | 0,67 | 1,59 | 0,17381 | 1,60  | 3,02  | 0,00732 | NM_182752       | MRPL49   |
| 7941164 | 0,67 | 1,59 | 0,04586 | 0,99  | 1,98  | 0,14948 | NM_004927       | TMX3     |
| 8023735 | 0,67 | 1,59 | 0,24689 | 0,20  | 1,15  | 0,19794 | NM_019022       | ---      |
| 8136889 | 0,67 | 1,59 | 0,19557 | -1,03 | -2,04 | 0,10648 | --- FBXW5       | ---      |
| 8165319 | 0,67 | 1,59 | 0,00887 | 1,13  | 2,18  | 0,09879 | NM_018998       | MSX2     |
| 8110084 | 0,67 | 1,59 | 0,31561 | 0,32  | 1,25  | 0,21673 | NM_002449       | ---      |
| 8058518 | 0,67 | 1,59 | 0,19305 | -0,35 | -1,27 | 0,11770 | --- APOL1       | ---      |
| 8072735 | 0,67 | 1,59 | 0,25168 | -1,30 | -2,46 | 0,05119 | NM_145343       | XPNPEP2  |
| 8169836 | 0,67 | 1,59 | 0,42303 | -0,83 | -1,78 | 0,38176 | NM_003399       | GALNT10  |
| 8109407 | 0,67 | 1,59 | 0,05626 | 0,95  | 1,93  | 0,00291 | NM_198321       | CLUAP1   |
| 7992917 | 0,67 | 1,59 | 0,19362 | 0,34  | 1,26  | 0,17244 | NM_015041       | EDC4     |
| 7996685 | 0,67 | 1,59 | 0,03485 | 1,83  | 3,56  | 0,03175 | NM_014329       | TMEM150A |
| 8053449 | 0,67 | 1,59 | 0,14031 | 1,35  | 2,54  | 0,08819 | NM_001031738    | TMPPE    |
| 8086048 | 0,67 | 1,59 | 0,11505 | 1,03  | 2,04  | 0,01187 | NM_001039770    | DNAJC27  |
| 8050790 | 0,67 | 1,59 | 0,01723 | 1,89  | 3,72  | 0,02663 | NM_016544       | CD74     |
| 8115147 | 0,67 | 1,59 | 0,19874 | 1,44  | 2,71  | 0,03443 | NM_001025159    | PAICS    |
| 8095221 | 0,67 | 1,59 | 0,06426 | 1,72  | 3,28  | 0,00635 | NM_001079525    | EIF3G    |
| 8033899 | 0,67 | 1,59 | 0,07963 | 2,68  | 6,41  | 0,00080 | NM_003755       | CPT1A    |
| 7949971 | 0,66 | 1,59 | 0,02202 | 0,96  | 1,94  | 0,00487 | NM_001876       | ---      |
| 7986601 | 0,66 | 1,58 | 0,27327 | -0,80 | -1,75 | 0,02372 | --- ---         | ---      |
| 7986739 | 0,66 | 1,58 | 0,27327 | -0,80 | -1,75 | 0,02372 | --- ZFHx3       | ---      |
| 8002692 | 0,66 | 1,58 | 0,00200 | 1,13  | 2,19  | 0,03453 | NM_006885       | PLCXD3   |
| 8111887 | 0,66 | 1,58 | 0,12421 | -1,09 | -2,13 | 0,00689 | NM_001005473    | ---      |
| 7954061 | 0,66 | 1,58 | 0,01378 | 0,12  | 1,09  | 0,79979 | --- C9orf46     | ---      |
| 8159984 | 0,66 | 1,58 | 0,39658 | 0,45  | 1,37  | 0,19433 | NM_018465       | AGBL5    |
| 8040774 | 0,66 | 1,58 | 0,00010 | 2,31  | 4,97  | 0,00107 | NM_021831       | TSTD2    |
| 8162676 | 0,66 | 1,58 | 0,05145 | 2,39  | 5,25  | 0,00067 | NM_139246       | ENOSF1   |
| 8021966 | 0,66 | 1,58 | 0,03878 | 2,56  | 5,91  | 0,00003 | NM_017512       | CENPO    |
| 8050763 | 0,66 | 1,58 | 0,21595 | 3,35  | 10,17 | 0,00099 | ENST00000380834 | SLC25A16 |
| 7934050 | 0,66 | 1,58 | 0,10165 | 0,60  | 1,51  | 0,00481 | NM_152707       | MED7     |
| 8115476 | 0,66 | 1,58 | 0,21185 | 1,05  | 2,07  | 0,02210 | NM_004270       | GAB2     |
| 7950671 | 0,66 | 1,58 | 0,14338 | 0,95  | 1,94  | 0,12290 | NM_080491       | ZNF252   |
| 8153935 | 0,66 | 1,58 | 0,05711 | 3,18  | 9,08  | 0,00232 | NR_023392       | COQ2     |
| 8101437 | 0,66 | 1,58 | 0,17690 | 1,59  | 3,01  | 0,00002 | NM_015697       | CCDC77   |
| 7952914 | 0,66 | 1,58 | 0,09815 | 1,40  | 2,64  | 0,00596 | NM_032358       | FICD     |
| 7958410 | 0,66 | 1,58 | 0,13476 | 2,54  | 5,80  | 0,00148 | NM_007076       | PSMB5    |
| 7977879 | 0,66 | 1,58 | 0,23369 | 1,37  | 2,58  | 0,00624 | NM_001144932    | MICAL2   |
| 7938485 | 0,66 | 1,58 | 0,07560 | 1,48  | 2,78  | 0,00190 | NM_014632       | PPP2R2B  |
| 8114900 | 0,66 | 1,58 | 0,18247 | -0,42 | -1,33 | 0,17662 | NM_004576       | IGF1     |
| 7965873 | 0,66 | 1,58 | 0,10978 | -1,11 | -2,17 | 0,02967 | NM_001111283    | ZNF192   |
| 8117646 | 0,66 | 1,58 | 0,13371 | 1,16  | 2,24  | 0,01609 | NM_006298       | CADM1    |
| 7951807 | 0,66 | 1,58 | 0,01155 | 0,77  | 1,71  | 0,02805 | NM_014333       | C7orf70  |
| 8155332 | 0,66 | 1,58 | 0,30981 | 2,94  | 7,65  | 0,00195 | NM_001037163    | FAM189B  |
| 7920707 | 0,66 | 1,58 | 0,34849 | 1,26  | 2,39  | 0,04241 | NM_006589       | TMEM185B |
| 8054862 | 0,66 | 1,58 | 0,28295 | 1,29  | 2,45  | 0,15147 | NR_000034       | C3orf37  |
| 8082504 | 0,66 | 1,58 | 0,03078 | 1,61  | 3,06  | 0,07128 | NM_001006109    | MFSD11   |
| 8010092 | 0,66 | 1,57 | 0,15712 | 2,55  | 5,86  | 0,00070 | NM_024311       | ATPAF1   |
| 7915870 | 0,65 | 1,57 | 0,04530 | 0,65  | 1,57  | 0,02113 | NM_022745       | SCARB1   |
| 7967544 | 0,65 | 1,57 | 0,08408 | 2,80  | 6,98  | 0,00016 | NM_005505       | CYBASC3  |
| 7948565 | 0,65 | 1,57 | 0,04808 | 1,72  | 3,29  | 0,03774 | NM_001161454    | NUTF2    |
| 7996677 | 0,65 | 1,57 | 0,37118 | 1,54  | 2,90  | 0,01641 | NM_005796       | C1orf56  |
| 7905324 | 0,65 | 1,57 | 0,02708 | 2,97  | 7,86  | 0,00541 | BC002469 CENPO  | ---      |
| 8040578 | 0,65 | 1,57 | 0,22941 | 1,70  | 3,24  | 0,01391 | NM_024322       | STC2     |
| 8115851 | 0,65 | 1,57 | 0,21484 | 2,22  | 4,67  | 0,00368 | NM_003714       | CYCS     |
| 8138640 | 0,65 | 1,57 | 0,18825 | 1,50  | 2,82  | 0,01549 | NM_018947       | MSI2     |
| 8008682 | 0,65 | 1,57 | 0,00529 | 0,99  | 1,98  | 0,00700 | NM_138962       | PANX1    |
| 7943218 | 0,65 | 1,57 | 0,17077 | 1,47  | 2,77  | 0,00416 | NM_015368       | ORC4L    |
| 8055645 | 0,65 | 1,57 | 0,28593 | 1,52  | 2,88  | 0,00292 | NM_002552       | KIAA0141 |
| 8108832 | 0,65 | 1,57 | 0,14956 | 1,46  | 2,75  | 0,02720 | NM_014773       | KIAA0753 |
| 8011945 | 0,65 | 1,57 | 0,06852 | 1,22  | 2,33  | 0,07731 | NM_014804       | CHKA     |
| 7949916 | 0,65 | 1,57 | 0,07167 | 2,61  | 6,10  | 0,00799 | NM_001277       | GUCY1A3  |
| 8097957 | 0,65 | 1,57 | 0,16709 | -1,24 | -2,36 | 0,00001 | NM_000856       | AGPAT9   |
| 8096116 | 0,65 | 1,57 | 0,15614 | 3,92  | 15,14 | 0,00001 | NM_032717       | CASP8    |
| 8047419 | 0,65 | 1,57 | 0,03223 | 1,66  | 3,16  | 0,00003 | NM_001228       | PECR     |
| 8058837 | 0,65 | 1,57 | 0,10595 | 2,83  | 7,09  | 0,00025 | NM_018441       | PET112L  |
| 8103188 | 0,65 | 1,57 | 0,12115 | 0,01  | 1,01  | 0,96281 | NM_004564       | ---      |

|         |      |      |         |       |       |         |                |           |  |
|---------|------|------|---------|-------|-------|---------|----------------|-----------|--|
| 8150087 | 0,65 | 1,57 | 0,23429 | -0,31 | -1,24 | 0,21964 | ---            | SLU7      |  |
| 8115606 | 0,65 | 1,57 | 0,04594 | 0,81  | 1,76  | 0,06814 | NM_006425      | EDC3      |  |
| 7990379 | 0,65 | 1,57 | 0,09773 | 2,20  | 4,59  | 0,00283 | NM_001142443   | C22orf32  |  |
| 8073578 | 0,65 | 1,57 | 0,03346 | 1,98  | 3,95  | 0,00050 | BC024237 SF3B2 |           |  |
| 7941511 | 0,65 | 1,57 | 0,26422 | 1,08  | 2,11  | 0,10179 | NM_006842      | SYS1      |  |
| 8062964 | 0,65 | 1,57 | 0,22183 | 1,18  | 2,27  | 0,03044 | NM_033542      | LANCL2    |  |
| 8132897 | 0,65 | 1,57 | 0,35123 | 1,42  | 2,68  | 0,00192 | NM_018697      | PABPN1    |  |
| 7973384 | 0,65 | 1,57 | 0,14489 | 2,07  | 4,20  | 0,00492 | NM_004643      | ZNF83     |  |
| 8038967 | 0,65 | 1,57 | 0,06434 | 1,14  | 2,21  | 0,01109 | NM_001105549   | OAS2      |  |
| 7958913 | 0,65 | 1,57 | 0,20301 | -1,20 | -2,29 | 0,00043 | NM_002535      | SOX5      |  |
| 7961798 | 0,65 | 1,57 | 0,24316 | -1,06 | -2,08 | 0,02521 | NM_152989      | RNF135    |  |
| 8006229 | 0,65 | 1,56 | 0,20997 | 2,59  | 6,00  | 0,00130 | NM_032322      | IFT74     |  |
| 8154670 | 0,65 | 1,56 | 0,23322 | 0,77  | 1,70  | 0,07891 | NM_025103      | SRRD      |  |
| 8072113 | 0,65 | 1,56 | 0,28911 | 2,23  | 4,69  | 0,00170 | NM_001013694   | GPR125    |  |
| 8022338 | 0,64 | 1,56 | 0,08917 | 2,51  | 5,68  | 0,00237 | NM_145290      | PACS2     |  |
| 7977344 | 0,64 | 1,56 | 0,31716 | 2,46  | 5,52  | 0,00099 | NM_001100913   | MIR147    |  |
| 8163729 | 0,64 | 1,56 | 0,43889 | -0,90 | -1,87 | 0,00471 | NR_029604      | FYN       |  |
| 8128956 | 0,64 | 1,56 | 0,00743 | 0,65  | 1,57  | 0,02118 | NM_002037      | ZDBF2     |  |
| 8047784 | 0,64 | 1,56 | 0,36365 | 3,07  | 8,37  | 0,00360 | NM_020923      | PLBD2     |  |
| 7958989 | 0,64 | 1,56 | 0,20557 | 0,86  | 1,81  | 0,17910 | NM_173542      | S100A6    |  |
| 7920258 | 0,64 | 1,56 | 0,43591 | -0,23 | -1,17 | 0,69562 | NM_014624      | C21orf119 |  |
| 8068200 | 0,64 | 1,56 | 0,09094 | 2,16  | 4,46  | 0,00074 | NR_026845      | NUCKS1    |  |
| 7909142 | 0,64 | 1,56 | 0,14409 | -0,38 | -1,30 | 0,47287 | NM_022731      | VAV2      |  |
| 8164967 | 0,64 | 1,56 | 0,03629 | 2,40  | 5,28  | 0,00088 | NM_001134398   | ZNF275    |  |
| 8170635 | 0,64 | 1,56 | 0,16955 | 1,03  | 2,05  | 0,00652 | NM_001080485   | KRAS      |  |
| 7961865 | 0,64 | 1,56 | 0,23033 | 1,78  | 3,42  | 0,00159 | NM_033360      | PDGFRB    |  |
| 8115099 | 0,64 | 1,56 | 0,08115 | -0,81 | -1,75 | 0,01665 | NM_002609      | RRAGD     |  |
| 8128123 | 0,64 | 1,56 | 0,14857 | 2,72  | 6,57  | 0,00003 | NM_021244      | SLC35A3   |  |
| 7903281 | 0,64 | 1,56 | 0,05613 | 2,34  | 5,08  | 0,00084 | NM_012243      | WDR77     |  |
| 7918517 | 0,64 | 1,56 | 0,28581 | 2,07  | 4,21  | 0,01631 | NM_024102      | ---       |  |
| 8116651 | 0,64 | 1,56 | 0,31319 | -0,44 | -1,36 | 0,35942 | ---            | CWC22     |  |
| 8057441 | 0,64 | 1,56 | 0,02585 | 1,15  | 2,22  | 0,02461 | NM_020943      | DCUN1D5   |  |
| 7951325 | 0,64 | 1,56 | 0,32579 | 2,96  | 7,78  | 0,00069 | NM_032299      | ALKBH8    |  |
| 7951467 | 0,64 | 1,56 | 0,01397 | 1,34  | 2,54  | 0,00265 | NM_138775      | MAP7      |  |
| 8129783 | 0,64 | 1,56 | 0,08734 | 1,82  | 3,53  | 0,00317 | NM_003980      | MYST4     |  |
| 7928491 | 0,64 | 1,56 | 0,17071 | 2,57  | 5,94  | 0,00117 | NM_012330      | GIN1      |  |
| 8113403 | 0,64 | 1,56 | 0,12083 | 0,73  | 1,65  | 0,15654 | NM_017676      | TTC4      |  |
| 7901662 | 0,64 | 1,56 | 0,08404 | 0,03  | 1,02  | 0,83477 | NM_004623      | CMTM3     |  |
| 7996318 | 0,64 | 1,55 | 0,40482 | 1,98  | 3,93  | 0,06382 | NM_144601      | PUS3      |  |
| 7952522 | 0,64 | 1,55 | 0,12107 | 0,80  | 1,74  | 0,12314 | NM_031307      | RFX3      |  |
| 8159876 | 0,64 | 1,55 | 0,17718 | 1,15  | 2,22  | 0,03058 | NM_134428      | ABCA9     |  |
| 8017927 | 0,64 | 1,55 | 0,25796 | -0,72 | -1,65 | 0,00196 | NM_080283      | KIF11     |  |
| 7929258 | 0,64 | 1,55 | 0,09194 | 3,22  | 9,32  | 0,00017 | NM_004523      | ERO1LB    |  |
| 7925342 | 0,64 | 1,55 | 0,14033 | 3,10  | 8,57  | 0,00058 | NM_019891      | MRPS25    |  |
| 8085531 | 0,63 | 1,55 | 0,20502 | 1,53  | 2,88  | 0,00390 | NM_022497      | IL7R      |  |
| 8104901 | 0,63 | 1,55 | 0,17366 | -1,03 | -2,04 | 0,05074 | NM_002185      | ZNF772    |  |
| 8039645 | 0,63 | 1,55 | 0,09875 | 0,42  | 1,34  | 0,01888 | NM_001024596   | PCOLCE2   |  |
| 8091243 | 0,63 | 1,55 | 0,18845 | 0,93  | 1,90  | 0,05212 | NM_013363      | ITFG3     |  |
| 7991779 | 0,63 | 1,55 | 0,05372 | 1,64  | 3,11  | 0,01935 | NM_032039      | INPP5B    |  |
| 7915101 | 0,63 | 1,55 | 0,08500 | 1,67  | 3,19  | 0,00175 | NM_005540      | CLN6      |  |
| 7989975 | 0,63 | 1,55 | 0,05218 | 1,62  | 3,07  | 0,01219 | NM_017882      | BAT2L1    |  |
| 8158829 | 0,63 | 1,55 | 0,31552 | 3,58  | 11,99 | 0,00300 | NM_013318      | PRSS12    |  |
| 8102468 | 0,63 | 1,55 | 0,06393 | -0,59 | -1,50 | 0,21593 | NM_003619      | IFT81     |  |
| 7958620 | 0,63 | 1,55 | 0,18321 | 0,82  | 1,77  | 0,10495 | NM_014055      | GSTT2     |  |
| 8071809 | 0,63 | 1,55 | 0,27697 | 0,64  | 1,55  | 0,17141 | NM_000854      | GSTT2     |  |
| 8074962 | 0,63 | 1,55 | 0,27697 | 0,64  | 1,55  | 0,17141 | NM_000854      | BASP1     |  |
| 8104601 | 0,63 | 1,55 | 0,02895 | 1,07  | 2,09  | 0,04250 | NM_006317      | KLHL15    |  |
| 8171837 | 0,63 | 1,55 | 0,17992 | 2,55  | 5,87  | 0,00028 | NM_030624      | ACYP2     |  |
| 8041982 | 0,63 | 1,55 | 0,13686 | 0,55  | 1,46  | 0,11169 | NM_138448      | VMA21     |  |
| 8170479 | 0,63 | 1,55 | 0,03509 | 0,86  | 1,82  | 0,05289 | NM_001017980   | CASP6     |  |
| 8102311 | 0,63 | 1,55 | 0,27260 | 1,72  | 3,30  | 0,04713 | NM_001226      | PDE4DIP   |  |
| 7919168 | 0,63 | 1,55 | 0,19169 | -1,47 | -2,77 | 0,00214 | NM_022359      | CNP       |  |
| 8007188 | 0,63 | 1,55 | 0,26233 | 2,43  | 5,39  | 0,00551 | NM_033133      | RAC2      |  |
| 8075910 | 0,63 | 1,55 | 0,13977 | 0,00  | 1,00  | 0,98789 | NM_002872      | C9orf37   |  |
| 8165630 | 0,63 | 1,55 | 0,10176 | 3,01  | 8,08  | 0,00199 | NM_032937      | WIZ       |  |
| 8035040 | 0,63 | 1,55 | 0,12155 | 0,57  | 1,49  | 0,09105 | NM_021241      | AREG      |  |
| 8095744 | 0,63 | 1,55 | 0,05685 | 5,68  | 51,12 | 0,00074 | NM_001657      | TADA3     |  |
| 8085220 | 0,63 | 1,55 | 0,26489 | 2,51  | 5,70  | 0,00073 | NM_133480      | TSC2      |  |
| 7992474 | 0,63 | 1,55 | 0,05873 | 2,48  | 5,58  | 0,00388 | NM_000548      | TEK       |  |
| 8154692 | 0,63 | 1,55 | 0,24377 | -0,85 | -1,80 | 0,00543 | NM_000459      | MEF2D     |  |
| 7921014 | 0,63 | 1,55 | 0,24873 | 1,97  | 3,92  | 0,00269 | NM_005920      | ARMC10    |  |
| 8135229 | 0,63 | 1,55 | 0,49108 | 1,61  | 3,05  | 0,03052 | NM_031905      | PEMT      |  |
| 8013120 | 0,63 | 1,55 | 0,08218 | 1,96  | 3,89  | 0,00128 | NM_148172      | NHSL1     |  |

|         |      |      |         |       |       |         |                |           |
|---------|------|------|---------|-------|-------|---------|----------------|-----------|
| 8129888 | 0,63 | 1,55 | 0,07214 | 0,75  | 1,68  | 0,03971 | NM_001144060   | TTC13     |
| 7925003 | 0,63 | 1,54 | 0,54357 | 3,15  | 8,89  | 0,00002 | NM_024525      | CHTF8     |
| 8002266 | 0,63 | 1,54 | 0,47335 | 1,95  | 3,87  | 0,00360 | NR_033227      | UTP18     |
| 8008530 | 0,63 | 1,54 | 0,26304 | 1,50  | 2,83  | 0,00085 | NM_016001      | ---       |
| 7957611 | 0,63 | 1,54 | 0,04212 | -0,29 | -1,22 | 0,25361 | ---            | ZNF18     |
| 8012843 | 0,63 | 1,54 | 0,08211 | 0,62  | 1,54  | 0,05619 | NM_144680      | DIS3L     |
| 7984298 | 0,63 | 1,54 | 0,06774 | 2,68  | 6,40  | 0,00054 | NM_133375      | VBP1      |
| 8171013 | 0,63 | 1,54 | 0,26115 | 1,60  | 3,03  | 0,00703 | NM_003372      | TRPV2     |
| 8005171 | 0,62 | 1,54 | 0,21610 | -1,43 | -2,69 | 0,00471 | NM_016113      | ZNF236    |
| 8021783 | 0,62 | 1,54 | 0,08238 | 2,06  | 4,16  | 0,00003 | NM_007345      | ---       |
| 8088893 | 0,62 | 1,54 | 0,34637 | 0,93  | 1,91  | 0,05167 | ---            | AASS      |
| 8142554 | 0,62 | 1,54 | 0,04898 | 0,83  | 1,77  | 0,03530 | NM_005763      | RPL23AP82 |
| 7911307 | 0,62 | 1,54 | 0,03927 | 0,09  | 1,07  | 0,80634 | NR_026981      | GNB2      |
| 8134890 | 0,62 | 1,54 | 0,17598 | 0,68  | 1,61  | 0,14494 | NM_005273      | HSPB7     |
| 7912692 | 0,62 | 1,54 | 0,38802 | -0,73 | -1,66 | 0,01024 | NM_014424      | SOCS6     |
| 8021707 | 0,62 | 1,54 | 0,23840 | 0,56  | 1,48  | 0,11863 | NM_004232      | ICMT      |
| 7911993 | 0,62 | 1,54 | 0,12378 | 1,63  | 3,10  | 0,00493 | NM_012405      | SFRS9     |
| 7967060 | 0,62 | 1,54 | 0,29702 | 1,20  | 2,30  | 0,00627 | NM_003769      | LOC149837 |
| 8064866 | 0,62 | 1,54 | 0,39221 | 0,91  | 1,88  | 0,15612 | NR_015406      | GPR63     |
| 8128316 | 0,62 | 1,54 | 0,14129 | 1,04  | 2,06  | 0,03322 | NM_001143957   | TAF6      |
| 8141425 | 0,62 | 1,54 | 0,24384 | 2,05  | 4,14  | 0,00138 | NM_005641      | LSM2      |
| 8125125 | 0,62 | 1,54 | 0,17548 | 1,38  | 2,61  | 0,01347 | NM_021177      | LSM2      |
| 8178641 | 0,62 | 1,54 | 0,17548 | 1,38  | 2,61  | 0,01347 | NM_021177      | LSM2      |
| 8179839 | 0,62 | 1,54 | 0,17548 | 1,38  | 2,61  | 0,01347 | NM_021177      | PAN2      |
| 7964089 | 0,62 | 1,54 | 0,18532 | 2,46  | 5,49  | 0,00424 | NM_001127460   | FMN1      |
| 7987145 | 0,62 | 1,54 | 0,07323 | -0,71 | -1,64 | 0,02820 | NM_001103184   | C15orf61  |
| 7984405 | 0,62 | 1,54 | 0,31932 | 2,52  | 5,73  | 0,00373 | NM_001143936   | ZNF238    |
| 7911038 | 0,62 | 1,54 | 0,09005 | 0,39  | 1,31  | 0,09333 | NM_205768      | GCN1L1    |
| 7966938 | 0,62 | 1,54 | 0,08471 | 3,37  | 10,33 | 0,00098 | NM_006836      | SOCS3     |
| 8018864 | 0,62 | 1,53 | 0,07220 | 0,42  | 1,34  | 0,10231 | NM_003955      | LIMK2     |
| 8072461 | 0,62 | 1,53 | 0,12316 | 0,09  | 1,06  | 0,84176 | NM_016733      | ZC3H12C   |
| 7943715 | 0,62 | 1,53 | 0,08805 | 2,20  | 4,61  | 0,00284 | NM_033390      | LIPM      |
| 7929003 | 0,62 | 1,53 | 0,07219 | -0,90 | -1,86 | 0,05908 | NM_001128215   | KDM3B     |
| 8108330 | 0,62 | 1,53 | 0,15087 | 2,29  | 4,89  | 0,00015 | NM_016604      | PROCR     |
| 8062108 | 0,62 | 1,53 | 0,35849 | 1,23  | 2,34  | 0,00884 | NM_006404      | KAT5      |
| 7941382 | 0,62 | 1,53 | 0,25139 | 2,33  | 5,02  | 0,00799 | NM_182710      | PHC1      |
| 7953812 | 0,62 | 1,53 | 0,29240 | 2,36  | 5,13  | 0,00006 | NM_004426      | NPIPL3    |
| 7994371 | 0,62 | 1,53 | 0,42565 | 1,88  | 3,69  | 0,00198 | NM_130464      | C6orf136  |
| 8177851 | 0,62 | 1,53 | 0,26930 | 2,98  | 7,91  | 0,00024 | NM_001161376   | C6orf136  |
| 8179167 | 0,62 | 1,53 | 0,26930 | 2,98  | 7,91  | 0,00024 | NM_001161376   | EFTUD1    |
| 7990879 | 0,62 | 1,53 | 0,13582 | 1,16  | 2,23  | 0,13046 | NM_024580      | TFCP2     |
| 7963244 | 0,62 | 1,53 | 0,11843 | 2,05  | 4,14  | 0,00142 | NM_005653      | HDHC3     |
| 7991401 | 0,61 | 1,53 | 0,18867 | 1,14  | 2,21  | 0,01123 | NM_198527      | SLC2A1    |
| 7915472 | 0,61 | 1,53 | 0,33010 | 3,22  | 9,30  | 0,00071 | NM_006516      | KNTC1     |
| 7959408 | 0,61 | 1,53 | 0,10777 | 2,76  | 6,75  | 0,00176 | NM_014708      | ARMC7     |
| 8009755 | 0,61 | 1,53 | 0,00801 | 1,53  | 2,89  | 0,01028 | NM_024585      | GEN1      |
| 8040440 | 0,61 | 1,53 | 0,20743 | 1,81  | 3,50  | 0,00703 | NM_182625      | MGC70870  |
| 8019563 | 0,61 | 1,53 | 0,26075 | 3,26  | 9,55  | 0,00777 | NR_003682      | NADSYN1   |
| 7942232 | 0,61 | 1,53 | 0,00523 | 1,40  | 2,64  | 0,04693 | NM_018161      | NBPF16    |
| 7904574 | 0,61 | 1,53 | 0,56032 | 0,04  | 1,03  | 0,90522 | NM_001102663   | HEATR2    |
| 8131000 | 0,61 | 1,53 | 0,18294 | 2,26  | 4,79  | 0,00563 | NM_017802      | C1orf50   |
| 7900597 | 0,61 | 1,53 | 0,20567 | 0,31  | 1,24  | 0,32247 | BC001508 CXCL2 |           |
| 8100994 | 0,61 | 1,53 | 0,00675 | 0,95  | 1,93  | 0,07735 | NM_002089      | FKBP9     |
| 8132214 | 0,61 | 1,53 | 0,14401 | 0,42  | 1,33  | 0,40010 | NM_007270      | RBBP9     |
| 8065230 | 0,61 | 1,53 | 0,15697 | 1,26  | 2,40  | 0,02672 | NM_006606      | GSTCD     |
| 8096688 | 0,61 | 1,52 | 0,27732 | 1,09  | 2,13  | 0,08036 | NM_001031720   | CHD3      |
| 8004699 | 0,61 | 1,52 | 0,25433 | 1,35  | 2,55  | 0,00339 | NM_001005273   | PDPK1     |
| 7998823 | 0,61 | 1,52 | 0,27145 | 1,02  | 2,03  | 0,01443 | NM_002613      | PDPK1     |
| 7998841 | 0,61 | 1,52 | 0,27145 | 1,02  | 2,03  | 0,01443 | NM_002613      | DIABLO    |
| 7967230 | 0,61 | 1,52 | 0,06153 | 1,85  | 3,62  | 0,00150 | NM_019887      | DNM2      |
| 8025741 | 0,61 | 1,52 | 0,41110 | 2,82  | 7,05  | 0,00009 | NM_001005360   | CNOT8     |
| 8109462 | 0,60 | 1,52 | 0,21270 | 2,62  | 6,14  | 0,00009 | NM_004779      | CSNK1E    |
| 8076056 | 0,60 | 1,52 | 0,08924 | 2,70  | 6,48  | 0,00388 | NM_001894      | PLEKHF2   |
| 8147439 | 0,60 | 1,52 | 0,03054 | 1,94  | 3,85  | 0,01912 | NM_024613      | MPZL3     |
| 7952036 | 0,60 | 1,52 | 0,14075 | 2,93  | 7,64  | 0,00112 | NM_198275      | TBL1X     |
| 8165911 | 0,60 | 1,52 | 0,45320 | 3,33  | 10,05 | 0,00022 | NM_005647      | HINT3     |
| 8121886 | 0,60 | 1,52 | 0,25951 | 1,32  | 2,49  | 0,00202 | NM_138571      | PCYT1A    |
| 8093086 | 0,60 | 1,52 | 0,26065 | 1,42  | 2,67  | 0,04457 | NM_005017      | ZNF142    |
| 8058973 | 0,60 | 1,52 | 0,19247 | 2,23  | 4,69  | 0,00030 | NM_001105537   | RARRES2   |
| 8143772 | 0,60 | 1,52 | 0,21480 | -2,58 | -5,98 | 0,00477 | NM_002889      | C15orf17  |
| 7990429 | 0,60 | 1,52 | 0,21235 | 2,97  | 7,82  | 0,00316 | NM_020447      | PAAF1     |
| 7942476 | 0,60 | 1,52 | 0,21170 | 1,31  | 2,47  | 0,00313 | NM_025155      | PRPF6     |
| 8064218 | 0,60 | 1,52 | 0,09365 | 1,03  | 2,05  | 0,20471 | NM_012469      | FAM110B   |

|         |      |      |         |       |       |         |              |              |
|---------|------|------|---------|-------|-------|---------|--------------|--------------|
| 8146533 | 0,60 | 1,52 | 0,11482 | -0,88 | -1,84 | 0,00668 | NM_147189    | PDE8B        |
| 8106448 | 0,60 | 1,52 | 0,27239 | 1,38  | 2,60  | 0,00046 | NM_003719    | AP1S3        |
| 8059350 | 0,60 | 1,52 | 0,17145 | 0,97  | 1,96  | 0,05135 | NM_001039569 | ZNF85        |
| 8027272 | 0,60 | 1,52 | 0,29028 | 0,10  | 1,07  | 0,62215 | NM_003429    | PCDHB16      |
| 8108716 | 0,60 | 1,52 | 0,19353 | -0,78 | -1,72 | 0,18001 | NM_020957    | DCLRE1C      |
| 7932186 | 0,60 | 1,52 | 0,06312 | 1,71  | 3,28  | 0,00381 | NM_001033858 | LOC284751    |
| 8063389 | 0,60 | 1,52 | 0,14383 | 0,29  | 1,22  | 0,51897 | AK090605     | CAMK1D       |
| 7926223 | 0,60 | 1,52 | 0,05569 | 0,37  | 1,30  | 0,21593 | NM_153498    | MTIF2        |
| 8052250 | 0,60 | 1,52 | 0,03105 | 2,10  | 4,29  | 0,00285 | NM_001005369 | UTS2D        |
| 8092741 | 0,60 | 1,51 | 0,08111 | -0,18 | -1,13 | 0,25837 | NM_198152    | C20orf29     |
| 8060698 | 0,60 | 1,51 | 0,04546 | 0,37  | 1,29  | 0,11456 | BC043344     | ---          |
| 8107934 | 0,60 | 1,51 | 0,17027 | -0,44 | -1,36 | 0,21310 | ---          | BPHL         |
| 8116635 | 0,60 | 1,51 | 0,17998 | 3,83  | 14,23 | 0,00058 | NR_026650    | RANBP3       |
| 8033075 | 0,60 | 1,51 | 0,32284 | 1,98  | 3,94  | 0,00298 | NM_003624    | LOC100288114 |
| 8031646 | 0,60 | 1,51 | 0,26084 | 3,77  | 13,61 | 0,00305 | AK302988     | TXNDC11      |
| 7999478 | 0,60 | 1,51 | 0,06429 | 1,67  | 3,18  | 0,00237 | NM_015914    | ZNF792       |
| 8036045 | 0,60 | 1,51 | 0,11725 | 1,38  | 2,60  | 0,05785 | NM_175872    | ATP6V1G2     |
| 8178508 | 0,60 | 1,51 | 0,30272 | 0,42  | 1,33  | 0,26817 | NM_130463    | EIF3B        |
| 8131111 | 0,60 | 1,51 | 0,32410 | 1,65  | 3,15  | 0,00646 | NM_001037283 | TBC1D2       |
| 8162759 | 0,60 | 1,51 | 0,22797 | 0,42  | 1,33  | 0,22670 | NM_018421    | PRICKLE2     |
| 8088550 | 0,60 | 1,51 | 0,09048 | -1,21 | -2,31 | 0,06559 | NM_198859    | TOLLIP       |
| 7945620 | 0,60 | 1,51 | 0,04908 | 0,93  | 1,90  | 0,02627 | NM_019009    | CACNA1C      |
| 7953040 | 0,60 | 1,51 | 0,07154 | -0,93 | -1,90 | 0,00241 | NM_199460    | KCTD2        |
| 8009737 | 0,60 | 1,51 | 0,01594 | 1,96  | 3,90  | 0,00476 | NM_015353    | ATP6V0A2     |
| 7959657 | 0,60 | 1,51 | 0,08014 | 3,22  | 9,35  | 0,00170 | NM_012463    | FAM199X      |
| 8169085 | 0,59 | 1,51 | 0,01206 | 1,01  | 2,01  | 0,01426 | NM_207318    | CHD1L        |
| 7904883 | 0,59 | 1,51 | 0,01958 | 1,42  | 2,68  | 0,00626 | NM_004284    | C2orf3       |
| 8053288 | 0,59 | 1,51 | 0,27879 | 1,64  | 3,12  | 0,00969 | NM_003203    | UFD1L        |
| 8074464 | 0,59 | 1,51 | 0,45940 | 1,00  | 2,00  | 0,12883 | NM_005659    | CNTLN        |
| 8154449 | 0,59 | 1,51 | 0,01200 | 0,58  | 1,49  | 0,07654 | NM_017738    | EDEM2        |
| 8065855 | 0,59 | 1,51 | 0,17303 | 0,63  | 1,55  | 0,09592 | NM_018217    | ---          |
| 8052022 | 0,59 | 1,51 | 0,46036 | -1,09 | -2,13 | 0,09768 | ---          | CXorf38      |
| 8172110 | 0,59 | 1,51 | 0,03639 | 0,80  | 1,74  | 0,00219 | NM_144970    | SCIN         |
| 8131550 | 0,59 | 1,51 | 0,12919 | -0,58 | -1,50 | 0,01736 | NM_001112706 | SPTLC2       |
| 7980438 | 0,59 | 1,51 | 0,14099 | 2,33  | 5,03  | 0,00015 | NM_004863    | ZNF232       |
| 8011817 | 0,59 | 1,51 | 0,02535 | 1,34  | 2,52  | 0,00446 | NM_014519    | SLC3A2       |
| 7940717 | 0,59 | 1,51 | 0,17122 | 3,67  | 12,72 | 0,00164 | NM_001012661 | POR          |
| 8133670 | 0,59 | 1,51 | 0,30079 | 1,33  | 2,51  | 0,04764 | NM_000941    | EGFR         |
| 8132860 | 0,59 | 1,51 | 0,19871 | 2,64  | 6,22  | 0,00229 | NM_005228    | SCAPER       |
| 7990582 | 0,59 | 1,51 | 0,10303 | 1,41  | 2,67  | 0,00353 | NM_020843    | C11orf80     |
| 7941714 | 0,59 | 1,51 | 0,25133 | 1,84  | 3,58  | 0,00420 | NM_024650    | MEMO1        |
| 8068410 | 0,59 | 1,51 | 0,19460 | 0,68  | 1,60  | 0,01340 | NM_015955    | C13orf34     |
| 7969374 | 0,59 | 1,51 | 0,12607 | 2,01  | 4,04  | 0,00867 | NM_024808    | TMCO3        |
| 7970301 | 0,59 | 1,51 | 0,22425 | 1,53  | 2,88  | 0,00219 | NM_017905    | SLC25A12     |
| 8056766 | 0,59 | 1,51 | 0,24187 | 2,66  | 6,32  | 0,00146 | NM_003705    | SLC36A1      |
| 8109350 | 0,59 | 1,51 | 0,12813 | 2,31  | 4,95  | 0,00008 | NM_078483    | PRDM1        |
| 8121257 | 0,59 | 1,51 | 0,11973 | -0,81 | -1,75 | 0,00427 | NM_001198    | CCDC69       |
| 8115261 | 0,59 | 1,51 | 0,13359 | -0,59 | -1,50 | 0,15436 | NM_015621    | PHF8         |
| 8173009 | 0,59 | 1,51 | 0,16289 | 2,24  | 4,71  | 0,00140 | NM_015107    | C6orf35      |
| 8130464 | 0,59 | 1,51 | 0,38784 | 1,24  | 2,35  | 0,02086 | NM_018452    | SLC7A3       |
| 8173414 | 0,59 | 1,51 | 0,09898 | -0,61 | -1,53 | 0,01868 | NM_032803    | HLA-DQA1     |
| 8178199 | 0,59 | 1,50 | 0,53809 | -1,73 | -3,31 | 0,00074 | NM_002122    | HLA-DQA1     |
| 8179489 | 0,59 | 1,50 | 0,53809 | -1,73 | -3,31 | 0,00074 | NM_002122    | RHOD         |
| 7941761 | 0,59 | 1,50 | 0,37350 | 2,31  | 4,96  | 0,00080 | NM_014578    | C19orf6      |
| 8032137 | 0,59 | 1,50 | 0,19671 | 2,97  | 7,86  | 0,00230 | NM_001033026 | ATP11A       |
| 7970162 | 0,59 | 1,50 | 0,23986 | 3,26  | 9,61  | 0,00003 | NM_015205    | ---          |
| 7987403 | 0,59 | 1,50 | 0,23108 | -1,29 | -2,45 | 0,00823 | ---          | NEFM         |
| 8145361 | 0,59 | 1,50 | 0,10768 | -0,95 | -1,94 | 0,02763 | NM_005382    | MALAT1       |
| 7949410 | 0,59 | 1,50 | 0,28705 | -1,51 | -2,85 | 0,04925 | BC018448     | CPEB3        |
| 7935011 | 0,59 | 1,50 | 0,00538 | 0,48  | 1,40  | 0,18962 | NM_014912    | ZNF304       |
| 8031726 | 0,59 | 1,50 | 0,17492 | 1,55  | 2,94  | 0,00008 | NM_020657    | ISLR         |
| 7984813 | 0,59 | 1,50 | 0,41135 | -1,47 | -2,78 | 0,00125 | NM_005545    | MRV11        |
| 7946589 | 0,59 | 1,50 | 0,32504 | -0,53 | -1,45 | 0,06636 | NM_130385    | EPN2         |
| 8005557 | 0,59 | 1,50 | 0,33438 | 1,21  | 2,31  | 0,06507 | NM_014964    | ZNF337       |
| 8065517 | 0,59 | 1,50 | 0,03092 | 0,01  | 1,01  | 0,84030 | NM_015655    | LDOC1L       |
| 8076673 | 0,59 | 1,50 | 0,12198 | 1,82  | 3,52  | 0,01095 | NM_032287    | HMGA1        |
| 8118794 | 0,59 | 1,50 | 0,41665 | 1,47  | 2,76  | 0,05039 | NM_145899    | GPN3         |
| 7966321 | 0,59 | 1,50 | 0,29300 | 2,43  | 5,38  | 0,00034 | NM_001164373 | KIAA1324L    |
| 8140709 | 0,59 | 1,50 | 0,13036 | 3,96  | 15,58 | 0,00160 | NR_030672    | MRC2         |
| 8009040 | 0,59 | 1,50 | 0,08095 | 0,43  | 1,34  | 0,36122 | NM_006039    | SLC12A8      |
| 8090214 | 0,58 | 1,50 | 0,09972 | 0,27  | 1,21  | 0,08390 | NM_024628    | ZNF438       |
| 7932867 | 0,58 | 1,50 | 0,02804 | 0,64  | 1,56  | 0,16064 | NM_001143770 | PPARD        |
| 8118945 | 0,58 | 1,50 | 0,17974 | 1,46  | 2,75  | 0,05648 | NM_001171818 | TNFRSF19     |

|         |      |      |         |       |       |         |              |            |
|---------|------|------|---------|-------|-------|---------|--------------|------------|
| 7968015 | 0,58 | 1,50 | 0,28653 | -0,96 | -1,94 | 0,00234 | NM_148957    | MRPL27     |
| 8016699 | 0,58 | 1,50 | 0,08141 | 0,26  | 1,20  | 0,32336 | NM_016504    | NDUFA7     |
| 8033564 | 0,58 | 1,50 | 0,23036 | 1,89  | 3,71  | 0,00891 | NM_005001    | C20orf111  |
| 8066402 | 0,58 | 1,50 | 0,18494 | 2,13  | 4,37  | 0,00046 | NM_016470    | TBC1D9B    |
| 8116348 | 0,58 | 1,50 | 0,04065 | 1,85  | 3,60  | 0,00800 | NM_198868    | NPRL3      |
| 7998157 | 0,58 | 1,50 | 0,13799 | 1,73  | 3,32  | 0,00415 | NM_001077350 | SMCR8      |
| 8005441 | 0,58 | 1,50 | 0,21874 | 1,43  | 2,69  | 0,01546 | NM_144775    | DRP2       |
| 8168817 | 0,58 | 1,50 | 0,16643 | -0,94 | -1,92 | 0,07066 | NM_001939    | S1PR1      |
| 7903393 | 0,58 | 1,50 | 0,44126 | -0,53 | -1,44 | 0,04351 | NM_001400    | RIC8A      |
| 7937275 | 0,58 | 1,50 | 0,02633 | 2,45  | 5,48  | 0,04307 | NM_021932    | ---        |
| 8051773 | 0,58 | 1,49 | 0,10119 | 0,90  | 1,86  | 0,04336 | ---          | SNORD29    |
| 7948902 | 0,58 | 1,49 | 0,17455 | 1,37  | 2,58  | 0,11676 | NR_002559    | ---        |
| 8043489 | 0,58 | 1,49 | 0,30199 | -0,88 | -1,85 | 0,04435 | ---          | C14orf109  |
| 7976333 | 0,58 | 1,49 | 0,00681 | 0,97  | 1,96  | 0,11800 | NM_015676    | TJP2       |
| 8155707 | 0,58 | 1,49 | 0,13062 | 2,01  | 4,03  | 0,00005 | NM_004817    | DCAF8      |
| 7921552 | 0,58 | 1,49 | 0,03775 | 2,49  | 5,61  | 0,00001 | NR_028103    | ---        |
| 7982248 | 0,58 | 1,49 | 0,71439 | -2,85 | -7,19 | 0,00563 | ---          | ZNF135     |
| 8031857 | 0,58 | 1,49 | 0,05785 | -0,93 | -1,91 | 0,01083 | NM_003436    | NSMCE4A    |
| 7936777 | 0,58 | 1,49 | 0,03596 | 0,72  | 1,65  | 0,08763 | NM_017615    | REEP4      |
| 8149673 | 0,58 | 1,49 | 0,06700 | 2,74  | 6,70  | 0,00482 | NM_025232    | NKTR       |
| 8079079 | 0,58 | 1,49 | 0,25792 | 0,76  | 1,69  | 0,01002 | NM_005385    | BET1L      |
| 7945349 | 0,58 | 1,49 | 0,34782 | 1,46  | 2,74  | 0,02431 | NM_016526    | TNRC6B     |
| 8073214 | 0,58 | 1,49 | 0,04398 | 1,57  | 2,96  | 0,00612 | NM_001024843 | LEO1       |
| 7988838 | 0,58 | 1,49 | 0,15718 | 1,25  | 2,38  | 0,00382 | NM_138792    | SEMA7A     |
| 7990345 | 0,58 | 1,49 | 0,09507 | 2,31  | 4,96  | 0,01338 | NM_003612    | SH3BP5     |
| 8085556 | 0,58 | 1,49 | 0,00527 | -0,24 | -1,18 | 0,47799 | NM_004844    | PPP2R5A    |
| 7909586 | 0,58 | 1,49 | 0,10203 | 2,38  | 5,22  | 0,00127 | NM_006243    | CDC37L1    |
| 8154153 | 0,58 | 1,49 | 0,15044 | 0,83  | 1,78  | 0,00919 | NM_017913    | ESCO2      |
| 8145570 | 0,58 | 1,49 | 0,05125 | 1,19  | 2,27  | 0,07597 | NM_001017420 | C1orf212   |
| 7914750 | 0,58 | 1,49 | 0,22875 | 0,74  | 1,67  | 0,10826 | NM_138428    | HSPB11     |
| 7916356 | 0,58 | 1,49 | 0,13539 | 1,06  | 2,09  | 0,00035 | NM_016126    | WWP2       |
| 7996976 | 0,57 | 1,49 | 0,09021 | 1,73  | 3,33  | 0,01875 | NM_007014    | SRA1       |
| 8114583 | 0,57 | 1,49 | 0,05676 | 0,16  | 1,11  | 0,37117 | NM_001035235 | ANKS1A     |
| 8118863 | 0,57 | 1,49 | 0,14352 | 2,73  | 6,62  | 0,00164 | NM_015245    | ARHGAP10   |
| 8097717 | 0,57 | 1,49 | 0,01415 | 0,18  | 1,13  | 0,33928 | NM_024605    | DUSP6      |
| 7965335 | 0,57 | 1,49 | 0,27093 | 2,30  | 4,94  | 0,00444 | NM_001946    | DHPS       |
| 8034454 | 0,57 | 1,49 | 0,05958 | 3,22  | 9,34  | 0,00300 | NM_001930    | GLTSCR2    |
| 8029958 | 0,57 | 1,49 | 0,01466 | 0,72  | 1,64  | 0,00668 | NM_015710    | SPATA17    |
| 7909768 | 0,57 | 1,49 | 0,30725 | 0,45  | 1,37  | 0,37581 | NM_138796    | HM13       |
| 8061542 | 0,57 | 1,49 | 0,00271 | 1,85  | 3,59  | 0,00294 | NM_178580    | POLR3A     |
| 7934653 | 0,57 | 1,49 | 0,21513 | 1,79  | 3,46  | 0,00274 | NM_007055    | PIAS3      |
| 7904812 | 0,57 | 1,49 | 0,21727 | 3,28  | 9,71  | 0,00079 | NM_006099    | C6orf136   |
| 8117987 | 0,57 | 1,49 | 0,21712 | 2,69  | 6,43  | 0,00050 | NM_001161376 | MCM6       |
| 8055426 | 0,57 | 1,49 | 0,24207 | 2,04  | 4,10  | 0,01846 | NM_005915    | RBL1       |
| 8066136 | 0,57 | 1,48 | 0,21004 | 3,06  | 8,34  | 0,00010 | NM_002895    | PPIA       |
| 8132642 | 0,57 | 1,48 | 0,22751 | 0,83  | 1,77  | 0,13769 | NM_021130    | GCC1       |
| 8142740 | 0,57 | 1,48 | 0,09931 | 0,49  | 1,41  | 0,00054 | NM_024523    | ST6GALNAC2 |
| 8018761 | 0,57 | 1,48 | 0,11244 | 2,70  | 6,50  | 0,00006 | NM_006456    | PDXDC2     |
| 8000537 | 0,57 | 1,48 | 0,49730 | 1,71  | 3,28  | 0,00779 | NR_003610    | MBOAT7     |
| 8039166 | 0,57 | 1,48 | 0,09008 | 1,29  | 2,44  | 0,11242 | NM_024298    | RNF214     |
| 7944096 | 0,57 | 1,48 | 0,19570 | 2,05  | 4,13  | 0,00281 | NM_207343    | TMED3      |
| 7985240 | 0,57 | 1,48 | 0,04048 | 0,65  | 1,57  | 0,17053 | NM_007364    | TNFSF15    |
| 8163618 | 0,57 | 1,48 | 0,25680 | -0,75 | -1,68 | 0,01553 | NM_005118    | NRG1       |
| 8145736 | 0,57 | 1,48 | 0,04857 | -0,71 | -1,64 | 0,10233 | NM_013958    | ZNF274     |
| 8031871 | 0,57 | 1,48 | 0,15311 | 0,77  | 1,71  | 0,00629 | NM_133502    | CAPG       |
| 8053417 | 0,57 | 1,48 | 0,39664 | 1,62  | 3,08  | 0,00892 | NM_001747    | ZKSCAN1    |
| 8134680 | 0,57 | 1,48 | 0,42969 | 1,39  | 2,63  | 0,00654 | NM_003439    | DOM3Z      |
| 8179926 | 0,57 | 1,48 | 0,30379 | 0,77  | 1,71  | 0,00955 | NM_005510    | THRB       |
| 8085797 | 0,57 | 1,48 | 0,06386 | -0,09 | -1,07 | 0,52366 | NM_001128176 | EXOC8      |
| 7925043 | 0,57 | 1,48 | 0,34155 | 1,86  | 3,62  | 0,00357 | NM_175876    | ARLSB      |
| 7926531 | 0,57 | 1,48 | 0,34855 | 2,94  | 7,68  | 0,00052 | NM_178815    | SEC61A2    |
| 7926189 | 0,57 | 1,48 | 0,09547 | 0,82  | 1,77  | 0,09107 | NM_018144    | SDC3       |
| 7914282 | 0,56 | 1,48 | 0,03240 | 1,04  | 2,05  | 0,02171 | NM_014654    | TGS1       |
| 8146482 | 0,56 | 1,48 | 0,21732 | 1,35  | 2,55  | 0,00232 | NM_024831    | AHCYL2     |
| 8136095 | 0,56 | 1,48 | 0,17900 | 3,86  | 14,55 | 0,00015 | NM_015328    | ITFG2      |
| 7953111 | 0,56 | 1,48 | 0,04383 | 1,28  | 2,43  | 0,03390 | NM_018463    | SALL2      |
| 7977761 | 0,56 | 1,48 | 0,13687 | 0,61  | 1,53  | 0,16049 | NM_005407    | RALGAPA2   |
| 8065280 | 0,56 | 1,48 | 0,38509 | 3,10  | 8,58  | 0,00014 | NM_020343    | ---        |
| 7918465 | 0,56 | 1,48 | 0,39006 | -1,98 | -3,96 | 0,00472 | ---          | SAMD12     |
| 8152506 | 0,56 | 1,48 | 0,29880 | 0,38  | 1,30  | 0,15319 | NM_207506    | SMYD3      |
| 7925589 | 0,56 | 1,48 | 0,16903 | 0,80  | 1,74  | 0,05602 | NM_001167740 | CGRFR1     |
| 7974418 | 0,56 | 1,48 | 0,17222 | 1,28  | 2,43  | 0,00961 | NM_006568    | NCK2       |
| 8044133 | 0,56 | 1,48 | 0,20837 | 2,05  | 4,13  | 0,00191 | NM_003581    | C13orf31   |



|         |      |      |         |       |       |         |                  |           |
|---------|------|------|---------|-------|-------|---------|------------------|-----------|
| 7968883 | 0,56 | 1,48 | 0,27581 | 0,56  | 1,48  | 0,25390 | NM_153218        | WDR6      |
| 8079693 | 0,56 | 1,48 | 0,06671 | 2,42  | 5,36  | 0,00257 | NM_018031        | GCA       |
| 8046003 | 0,56 | 1,48 | 0,25665 | 1,86  | 3,62  | 0,01795 | NM_012198        | C10orf26  |
| 7930162 | 0,56 | 1,48 | 0,17759 | 0,36  | 1,29  | 0,30237 | NM_017787        | PI4KAP2   |
| 8074577 | 0,56 | 1,47 | 0,06934 | 3,40  | 10,54 | 0,00011 | NR_003700        | NPM3      |
| 7935903 | 0,56 | 1,47 | 0,20897 | 1,68  | 3,21  | 0,02493 | NM_006993        | CC2D1B    |
| 7916135 | 0,56 | 1,47 | 0,19174 | 0,80  | 1,74  | 0,00472 | NM_032449        | CBY1      |
| 8073022 | 0,56 | 1,47 | 0,17800 | 1,78  | 3,44  | 0,01603 | NM_001002880     | FOXJ2     |
| 7953699 | 0,56 | 1,47 | 0,04618 | 1,52  | 2,87  | 0,00303 | NM_018416        | PIGC      |
| 7922330 | 0,56 | 1,47 | 0,26951 | 1,08  | 2,12  | 0,00634 | NM_153747        | ---       |
| 8118824 | 0,56 | 1,47 | 0,10187 | 0,62  | 1,54  | 0,03587 | --- DFFA         | ---       |
| 7912303 | 0,56 | 1,47 | 0,13816 | 2,14  | 4,40  | 0,00405 | NM_213566        | RAB33B    |
| 8097507 | 0,56 | 1,47 | 0,10288 | 1,95  | 3,85  | 0,01458 | NM_031296        | ADRM1     |
| 8063893 | 0,56 | 1,47 | 0,44334 | 3,02  | 8,12  | 0,00230 | NM_007002        | ARFGAP2   |
| 7947784 | 0,56 | 1,47 | 0,10216 | 2,09  | 4,25  | 0,00595 | NM_032389        | PDXDC2    |
| 8000501 | 0,56 | 1,47 | 0,52566 | 1,53  | 2,89  | 0,01980 | NR_003610        | TMEM161A  |
| 8035600 | 0,56 | 1,47 | 0,14413 | 2,41  | 5,31  | 0,00181 | NM_017814        | UTP3      |
| 8095539 | 0,56 | 1,47 | 0,08135 | 0,39  | 1,31  | 0,25123 | NM_020368        | ACPP      |
| 8082673 | 0,56 | 1,47 | 0,29265 | 0,39  | 1,31  | 0,28761 | NM_001099        | SSH1      |
| 7966150 | 0,56 | 1,47 | 0,28465 | 2,03  | 4,10  | 0,07097 | NM_001161330     | G6PC3     |
| 8007561 | 0,56 | 1,47 | 0,09800 | 2,60  | 6,08  | 0,00631 | NM_138387        | FLJ30064  |
| 8134460 | 0,55 | 1,47 | 0,23875 | 0,36  | 1,28  | 0,05785 | AK054626 CNRIP1  | ---       |
| 8052735 | 0,55 | 1,47 | 0,01542 | -0,94 | -1,92 | 0,00155 | NM_015463        | HPSS      |
| 7946988 | 0,55 | 1,47 | 0,29689 | 2,45  | 5,45  | 0,00030 | NM_181507        | LOC554223 |
| 8179028 | 0,55 | 1,47 | 0,20847 | 0,34  | 1,26  | 0,69848 | AK128290 C2orf69 | ---       |
| 8047262 | 0,55 | 1,47 | 0,15322 | 0,91  | 1,88  | 0,14348 | NM_153689        | RFC4      |
| 8092640 | 0,55 | 1,47 | 0,38148 | 3,99  | 15,94 | 0,00080 | NM_002916        | SETDB2    |
| 7969114 | 0,55 | 1,47 | 0,09804 | 0,62  | 1,54  | 0,06036 | NM_031915        | ZXDC      |
| 8090351 | 0,55 | 1,47 | 0,25025 | 1,61  | 3,05  | 0,00135 | NM_025112        | CASP7     |
| 7930577 | 0,55 | 1,47 | 0,15409 | 0,67  | 1,59  | 0,01457 | NM_033338        | RNF213    |
| 8010426 | 0,55 | 1,47 | 0,24815 | 1,27  | 2,41  | 0,00652 | NM_020914        | SMARCD2   |
| 8017460 | 0,55 | 1,47 | 0,10328 | 0,89  | 1,85  | 0,16208 | NM_001098426     | GLUL      |
| 7922689 | 0,55 | 1,47 | 0,10069 | 0,49  | 1,41  | 0,00619 | NM_002065        | OMA1      |
| 7916570 | 0,55 | 1,46 | 0,07930 | 0,77  | 1,71  | 0,04810 | NM_145243        | HYLS1     |
| 7945040 | 0,55 | 1,46 | 0,07051 | 0,59  | 1,50  | 0,21568 | NM_145014        | STK10     |
| 8115783 | 0,55 | 1,46 | 0,31536 | 1,10  | 2,14  | 0,01754 | NM_005990        | TCTEX1D2  |
| 8093096 | 0,55 | 1,46 | 0,16769 | 1,64  | 3,12  | 0,00485 | NM_152773        | TRIB2     |
| 8040365 | 0,55 | 1,46 | 0,47409 | -1,07 | -2,10 | 0,07754 | NM_021643        | GK3P      |
| 8103535 | 0,55 | 1,46 | 0,40362 | 1,95  | 3,86  | 0,02984 | NR_026575        | ---       |
| 8103904 | 0,55 | 1,46 | 0,26707 | 0,42  | 1,34  | 0,03431 | --- RAB33A       | ---       |
| 8169898 | 0,55 | 1,46 | 0,06955 | 0,17  | 1,13  | 0,63393 | NM_004794        | ZNF184    |
| 8124502 | 0,55 | 1,46 | 0,04592 | 2,05  | 4,15  | 0,00336 | NM_007149        | ANKRD13B  |
| 8006063 | 0,55 | 1,46 | 0,27367 | 2,01  | 4,04  | 0,00182 | NM_152345        | ELL       |
| 8035477 | 0,55 | 1,46 | 0,04572 | 0,32  | 1,25  | 0,05188 | NM_006532        | MCC       |
| 8113551 | 0,55 | 1,46 | 0,52763 | 1,08  | 2,12  | 0,06255 | NM_001085377     | MRE11A    |
| 7951046 | 0,55 | 1,46 | 0,19783 | 0,78  | 1,72  | 0,04387 | NM_005591        | ---       |
| 8165690 | 0,55 | 1,46 | 0,23286 | -1,13 | -2,18 | 0,00025 | --- RHOBTB2      | ---       |
| 8145227 | 0,55 | 1,46 | 0,12379 | 1,45  | 2,73  | 0,00151 | NM_001160036     | HACL1     |
| 8085608 | 0,54 | 1,46 | 0,11449 | 2,63  | 6,19  | 0,00017 | NM_012260        | ALKBH5    |
| 8005399 | 0,54 | 1,46 | 0,22684 | 2,22  | 4,64  | 0,00965 | NM_017758        | ANK2      |
| 8096959 | 0,54 | 1,46 | 0,26914 | 0,92  | 1,90  | 0,00454 | NM_001148        | CCNYL1    |
| 8047854 | 0,54 | 1,46 | 0,28243 | 1,59  | 3,00  | 0,00047 | NM_001142300     | LOC1720   |
| 8043036 | 0,54 | 1,46 | 0,27117 | 1,90  | 3,74  | 0,09673 | NR_033423        | BCL9L     |
| 7952116 | 0,54 | 1,46 | 0,06254 | 1,92  | 3,79  | 0,00091 | NM_182557        | B3GNT2    |
| 8042211 | 0,54 | 1,46 | 0,25987 | 1,09  | 2,13  | 0,01286 | NM_006577        | ZNF673    |
| 8166989 | 0,54 | 1,46 | 0,37283 | 1,82  | 3,53  | 0,00461 | NM_001129898     | STRN4     |
| 8037816 | 0,54 | 1,46 | 0,05581 | 2,56  | 5,90  | 0,00723 | NM_013403        | C11orf73  |
| 7942932 | 0,54 | 1,45 | 0,05418 | 0,92  | 1,90  | 0,02130 | NM_016401        | LRRC2     |
| 8086615 | 0,54 | 1,45 | 0,04247 | -0,51 | -1,42 | 0,01274 | NM_024750        | SUOX      |
| 7956097 | 0,54 | 1,45 | 0,26235 | 1,48  | 2,79  | 0,00182 | NM_000456        | ARL3      |
| 7936041 | 0,54 | 1,45 | 0,13244 | -0,23 | -1,17 | 0,29533 | NM_004311        | INPPL1    |
| 7942342 | 0,54 | 1,45 | 0,21757 | 0,66  | 1,58  | 0,05976 | NM_001567        | CARD8     |
| 8038029 | 0,54 | 1,45 | 0,11681 | 2,55  | 5,86  | 0,00020 | NM_014959        | ZNF440    |
| 8025958 | 0,54 | 1,45 | 0,03226 | 0,34  | 1,27  | 0,28538 | NM_152357        | FGFR10P   |
| 8123342 | 0,54 | 1,45 | 0,18218 | 0,15  | 1,11  | 0,45463 | NM_007045        | ALG14     |
| 7917896 | 0,54 | 1,45 | 0,23117 | 1,60  | 3,02  | 0,03206 | NM_144988        | ---       |
| 7946426 | 0,54 | 1,45 | 0,78732 | -1,19 | -2,28 | 0,36114 | --- CCND3        | ---       |
| 8126371 | 0,54 | 1,45 | 0,32899 | 1,22  | 2,32  | 0,18800 | NM_001760        | HNRNPUL2  |
| 7948814 | 0,54 | 1,45 | 0,27422 | 3,40  | 10,52 | 0,00016 | NM_001079559     | TOE1      |
| 7901091 | 0,54 | 1,45 | 0,33101 | 1,98  | 3,94  | 0,00032 | NM_025077        | SYT1      |
| 7957338 | 0,54 | 1,45 | 0,19350 | 2,41  | 5,30  | 0,00331 | NM_005639        | RPS19BP1  |
| 8076225 | 0,54 | 1,45 | 0,28009 | 0,51  | 1,42  | 0,18576 | NM_194326        | APOBEC3G  |
| 8073088 | 0,54 | 1,45 | 0,29174 | -0,71 | -1,63 | 0,02794 | NM_021822        | RNF185    |

|         |      |      |         |       |       |         |                 |           |
|---------|------|------|---------|-------|-------|---------|-----------------|-----------|
| 8075477 | 0,54 | 1,45 | 0,35034 | -1,28 | -2,42 | 0,03106 | NR_024209       | GOLT1B    |
| 7954388 | 0,54 | 1,45 | 0,28347 | 1,55  | 2,93  | 0,00907 | NM_016072       | SLC29A3   |
| 7928208 | 0,54 | 1,45 | 0,36482 | 0,94  | 1,92  | 0,03130 | NM_018344       | PPCS      |
| 7900546 | 0,53 | 1,45 | 0,42933 | 1,98  | 3,94  | 0,00444 | NM_024664       | ZNF610    |
| 8030914 | 0,53 | 1,45 | 0,21258 | -0,10 | -1,07 | 0,48362 | NM_001161425    | RAB12     |
| 8020029 | 0,53 | 1,45 | 0,08881 | 0,71  | 1,64  | 0,00457 | NM_001025300    | HIST2H2BF |
| 7919584 | 0,53 | 1,45 | 0,09589 | 0,43  | 1,35  | 0,03402 | NM_001024599    | ZNF326    |
| 7902891 | 0,53 | 1,45 | 0,22386 | 0,85  | 1,80  | 0,01992 | NM_182976       | C6orf167  |
| 8128329 | 0,53 | 1,45 | 0,28747 | 2,68  | 6,39  | 0,00283 | NM_198468       | C11orf82  |
| 7942832 | 0,53 | 1,45 | 0,11170 | 2,94  | 7,70  | 0,01005 | NM_145018       | KIAA0240  |
| 8119582 | 0,53 | 1,45 | 0,11222 | 1,04  | 2,06  | 0,00973 | NM_015349       | BNIP3     |
| 7973743 | 0,53 | 1,45 | 0,15941 | 0,29  | 1,22  | 0,58316 | ENST00000355069 | SYNJ2BP   |
| 7979916 | 0,53 | 1,45 | 0,06660 | 2,62  | 6,16  | 0,00321 | NM_018373       | RNASEH1   |
| 8050079 | 0,53 | 1,45 | 0,36726 | 2,12  | 4,36  | 0,01101 | NM_002936       | ZNF816A   |
| 8039017 | 0,53 | 1,45 | 0,41034 | 0,35  | 1,27  | 0,44094 | NM_001031665    | CPSF1     |
| 8153727 | 0,53 | 1,45 | 0,16517 | 1,43  | 2,70  | 0,02129 | NM_013291       | BRPF3     |
| 8119034 | 0,53 | 1,45 | 0,29905 | 2,88  | 7,35  | 0,00241 | NM_015695       | KIF1C     |
| 8004057 | 0,53 | 1,45 | 0,18987 | 1,85  | 3,60  | 0,07758 | NM_006612       | RBM41     |
| 8174340 | 0,53 | 1,45 | 0,31036 | 0,79  | 1,73  | 0,04931 | NM_018301       | CDRT1     |
| 8012951 | 0,53 | 1,45 | 0,61170 | 0,19  | 1,14  | 0,90528 | NM_006382       | QPRT      |
| 7994609 | 0,53 | 1,44 | 0,16420 | -0,91 | -1,88 | 0,09559 | NM_014298       | C1orf51   |
| 7905154 | 0,53 | 1,44 | 0,43208 | -1,28 | -2,43 | 0,04013 | BC027999 SPNS1  |           |
| 7994518 | 0,53 | 1,44 | 0,22185 | 1,52  | 2,86  | 0,02111 | NM_032038       | HIST1H3A  |
| 8117330 | 0,53 | 1,44 | 0,24360 | 1,00  | 2,00  | 0,03428 | NM_003529       | ARHGAP11A |
| 7982358 | 0,53 | 1,44 | 0,09115 | 2,40  | 5,29  | 0,00163 | NM_014783       | C6orf35   |
| 8130988 | 0,53 | 1,44 | 0,39792 | 1,21  | 2,31  | 0,02239 | NM_018452       | NAAA      |
| 8101086 | 0,53 | 1,44 | 0,22526 | 3,59  | 12,01 | 0,00040 | NM_014435       | SUDS3     |
| 8110415 | 0,53 | 1,44 | 0,18148 | 1,26  | 2,39  | 0,01755 | NM_022491       | NTNG1     |
| 7903461 | 0,53 | 1,44 | 0,20099 | -1,30 | -2,46 | 0,00235 | NM_001113226    | ZRANB3    |
| 8055377 | 0,53 | 1,44 | 0,33921 | 2,07  | 4,19  | 0,00764 | NM_032143       | AURKA     |
| 8067167 | 0,53 | 1,44 | 0,08534 | 2,74  | 6,70  | 0,00073 | NM_198433       | TRERF1    |
| 8126402 | 0,53 | 1,44 | 0,18968 | 0,75  | 1,69  | 0,00109 | NM_033502       | DPH5      |
| 7918034 | 0,53 | 1,44 | 0,03273 | 1,11  | 2,16  | 0,06140 | NM_001077394    | ---       |
| 8100555 | 0,53 | 1,44 | 0,06108 | 0,01  | 1,00  | 0,98091 | ---             | C8orf48   |
| 8144721 | 0,53 | 1,44 | 0,21564 | -0,55 | -1,47 | 0,03070 | NM_001007090    | ---       |
| 8155265 | 0,53 | 1,44 | 0,24789 | 0,22  | 1,16  | 0,33206 | ---             | SYPL2     |
| 7903667 | 0,53 | 1,44 | 0,02944 | -1,07 | -2,10 | 0,00067 | NM_001040709    | CHSY1     |
| 7991581 | 0,53 | 1,44 | 0,10953 | 0,33  | 1,26  | 0,24539 | NM_014918       | RPL13AP6  |
| 7936320 | 0,53 | 1,44 | 0,07227 | 0,65  | 1,57  | 0,07831 | NR_026715       | FAM165B   |
| 8068375 | 0,53 | 1,44 | 0,37812 | 2,39  | 5,25  | 0,00126 | NM_058182       | ZKSCAN5   |
| 8134621 | 0,52 | 1,44 | 0,24303 | 1,28  | 2,43  | 0,00032 | NM_014569       | ---       |
| 7898209 | 0,52 | 1,44 | 0,33956 | 0,19  | 1,14  | 0,58842 | ---             | ---       |
| 8169109 | 0,52 | 1,44 | 0,10314 | 0,97  | 1,95  | 0,01977 | ---             | MCAM      |
| 7952205 | 0,52 | 1,44 | 0,07815 | 0,94  | 1,92  | 0,03244 | NM_006500       | ---       |
| 8113443 | 0,52 | 1,44 | 0,22992 | -0,82 | -1,77 | 0,09932 | ---             | CAMKK2    |
| 7967127 | 0,52 | 1,44 | 0,36182 | 2,11  | 4,33  | 0,01265 | NM_006549       | GTF2F2    |
| 7968915 | 0,52 | 1,44 | 0,02739 | 0,66  | 1,58  | 0,02539 | NM_004128       | C3orf19   |
| 8078033 | 0,52 | 1,44 | 0,16159 | 1,40  | 2,63  | 0,00725 | NM_016474       | RASL11A   |
| 7968236 | 0,52 | 1,44 | 0,07561 | -0,56 | -1,47 | 0,04316 | NM_206827       | DDAH2     |
| 8125048 | 0,52 | 1,44 | 0,10114 | 0,61  | 1,53  | 0,25954 | NM_013974       | ITPR2     |
| 7961900 | 0,52 | 1,44 | 0,31762 | 0,79  | 1,73  | 0,02594 | NM_002223       | TMEM200A  |
| 8122038 | 0,52 | 1,44 | 0,45761 | -1,27 | -2,41 | 0,00005 | NM_052913       | CLDN1     |
| 8092726 | 0,52 | 1,44 | 0,36958 | 4,72  | 26,31 | 0,00067 | NM_021101       | OPHN1     |
| 8173310 | 0,52 | 1,44 | 0,26667 | 0,12  | 1,09  | 0,78813 | NM_002547       | CHD2      |
| 7986250 | 0,52 | 1,44 | 0,19759 | 2,30  | 4,92  | 0,00599 | NM_001271       | DNAJC25   |
| 8157203 | 0,52 | 1,44 | 0,16683 | 1,23  | 2,35  | 0,00245 | NM_001015882    | MAF1      |
| 8148737 | 0,52 | 1,43 | 0,11349 | 1,29  | 2,45  | 0,01013 | NM_032272       | LOC147727 |
| 8034097 | 0,52 | 1,43 | 0,36642 | 1,22  | 2,33  | 0,03064 | NR_024333       | LMLN      |
| 8085033 | 0,52 | 1,43 | 0,14839 | 2,08  | 4,23  | 0,00007 | NM_001136049    | MTRF1L    |
| 8130383 | 0,52 | 1,43 | 0,14942 | 1,07  | 2,09  | 0,00164 | NM_019041       | KIAA1324  |
| 7903592 | 0,52 | 1,43 | 0,10606 | 0,38  | 1,30  | 0,20160 | NM_020775       | RSBN1L    |
| 8133809 | 0,52 | 1,43 | 0,05424 | 0,62  | 1,53  | 0,04686 | NM_198467       | SMPD2     |
| 8121418 | 0,52 | 1,43 | 0,15260 | 2,38  | 5,19  | 0,00257 | NM_003080       | WDR35     |
| 8050507 | 0,52 | 1,43 | 0,19204 | 2,20  | 4,59  | 0,00644 | NM_001006657    | TRMT2B    |
| 8174005 | 0,52 | 1,43 | 0,26443 | 2,00  | 4,00  | 0,00021 | NM_024917       | ---       |
| 8155451 | 0,52 | 1,43 | 0,31186 | -0,86 | -1,81 | 0,06193 | ---             | ---       |
| 8161556 | 0,52 | 1,43 | 0,31186 | -0,86 | -1,81 | 0,06193 | ---             | SFMBT1    |
| 8088065 | 0,52 | 1,43 | 0,39017 | 2,58  | 5,97  | 0,00010 | NM_001005159    | NOVA1     |
| 7978391 | 0,52 | 1,43 | 0,10248 | 0,82  | 1,77  | 0,03858 | NM_002515       | FAM160A2  |
| 7946128 | 0,52 | 1,43 | 0,08195 | 2,25  | 4,76  | 0,00173 | NM_032127       | ERI1      |
| 8144516 | 0,52 | 1,43 | 0,31716 | 1,28  | 2,43  | 0,04609 | NM_153332       | MOAP1     |
| 7980983 | 0,52 | 1,43 | 0,42836 | 1,20  | 2,29  | 0,00043 | NM_022151       | SST       |
| 8092682 | 0,52 | 1,43 | 0,34753 | -1,66 | -3,17 | 0,00622 | NM_001048       | ATP5J     |

|         |      |      |         |       |       |         |               |           |
|---------|------|------|---------|-------|-------|---------|---------------|-----------|
| 8069633 | 0,52 | 1,43 | 0,37618 | 0,31  | 1,24  | 0,40207 | NM_001003703  | ARHGEF6   |
| 8175393 | 0,52 | 1,43 | 0,05505 | -0,08 | -1,06 | 0,70756 | NM_004840     | TSR2      |
| 8167790 | 0,52 | 1,43 | 0,42795 | 1,75  | 3,37  | 0,00517 | NM_058163     | HIST2H2BE |
| 7919637 | 0,52 | 1,43 | 0,14621 | 2,70  | 6,51  | 0,01173 | NM_003528     | HIST1H2AE |
| 8117408 | 0,52 | 1,43 | 0,03220 | 0,24  | 1,18  | 0,23429 | NM_021052     | TNXA      |
| 8125289 | 0,52 | 1,43 | 0,32255 | 0,03  | 1,02  | 0,95204 | NR_001284     | RFX5      |
| 7919971 | 0,52 | 1,43 | 0,11432 | 3,27  | 9,62  | 0,01463 | NM_000449     | FBXO9     |
| 8120251 | 0,52 | 1,43 | 0,11275 | 3,01  | 8,04  | 0,00003 | NM_033480     | NAT9      |
| 8018209 | 0,52 | 1,43 | 0,29529 | 1,43  | 2,70  | 0,00618 | NM_015654     | UBTD2     |
| 8115806 | 0,52 | 1,43 | 0,50856 | 2,81  | 7,01  | 0,00037 | NM_152277     | EGLN1     |
| 7925048 | 0,52 | 1,43 | 0,27130 | 0,52  | 1,43  | 0,32547 | NM_022051     | FBXL21    |
| 8108205 | 0,52 | 1,43 | 0,09976 | -0,90 | -1,87 | 0,00103 | NM_012159     | ADAMTS2   |
| 8116272 | 0,52 | 1,43 | 0,06367 | -1,04 | -2,06 | 0,01149 | NM_014244     | DNAJC9    |
| 8064976 | 0,51 | 1,43 | 0,33561 | 1,67  | 3,17  | 0,00445 | NM_015190     | NDUFS3    |
| 7939825 | 0,51 | 1,43 | 0,32535 | 1,07  | 2,11  | 0,25414 | NM_004551     | TCP11L1   |
| 7939184 | 0,51 | 1,43 | 0,26993 | 1,32  | 2,50  | 0,00031 | NM_018393     | AK3L1     |
| 7902038 | 0,51 | 1,43 | 0,64435 | -1,02 | -2,03 | 0,41502 | NM_001005353  | MSTO1     |
| 7906021 | 0,51 | 1,43 | 0,10694 | 1,33  | 2,52  | 0,00203 | NM_018116     | C17orf61  |
| 8012207 | 0,51 | 1,43 | 0,28109 | 2,94  | 7,65  | 0,00023 | BC030270 LCA5 |           |
| 8127756 | 0,51 | 1,43 | 0,27847 | 0,14  | 1,10  | 0,59987 | NM_181714     | MRPL14    |
| 8126653 | 0,51 | 1,43 | 0,28879 | 1,31  | 2,48  | 0,00255 | NM_032111     | TESK1     |
| 8155062 | 0,51 | 1,43 | 0,26150 | 1,29  | 2,45  | 0,07602 | NM_006285     | MTSS1     |
| 8152764 | 0,51 | 1,43 | 0,17200 | 0,58  | 1,49  | 0,00572 | NM_014751     | CDC42EP1  |
| 8072817 | 0,51 | 1,42 | 0,10890 | 1,42  | 2,67  | 0,04398 | NM_152243     | ---       |
| 7901856 | 0,51 | 1,42 | 0,34753 | 0,72  | 1,65  | 0,01627 | --- CDR2      | ---       |
| 8000236 | 0,51 | 1,42 | 0,10594 | 0,33  | 1,26  | 0,28390 | NM_001802     | SLC25A26  |
| 8080896 | 0,51 | 1,42 | 0,38995 | 3,36  | 10,24 | 0,00000 | NR_028475     | FCGRT     |
| 8030374 | 0,51 | 1,42 | 0,41166 | 0,66  | 1,58  | 0,23721 | NM_004107     | BRPF1     |
| 8077595 | 0,51 | 1,42 | 0,16423 | 2,24  | 4,73  | 0,02589 | NM_001003694  | ---       |
| 8115847 | 0,51 | 1,42 | 0,67357 | -0,14 | -1,10 | 0,88688 | ---           | ---       |
| 8050350 | 0,51 | 1,42 | 0,61089 | -1,36 | -2,58 | 0,14504 | --- FAM100A   | ---       |
| 7999173 | 0,51 | 1,42 | 0,55947 | 2,28  | 4,85  | 0,06503 | NM_145253     | PCCB      |
| 8082886 | 0,51 | 1,42 | 0,29833 | 2,39  | 5,25  | 0,00061 | NM_000532     | C20orf199 |
| 8063337 | 0,51 | 1,42 | 0,38622 | 1,86  | 3,62  | 0,00942 | NR_003605     | DEPDC1    |
| 7916898 | 0,51 | 1,42 | 0,16828 | 1,80  | 3,49  | 0,03260 | NM_001114120  | DTNB      |
| 8050846 | 0,51 | 1,42 | 0,33455 | 1,29  | 2,44  | 0,00003 | NM_021907     | RPS21     |
| 8063903 | 0,51 | 1,42 | 0,32219 | 0,56  | 1,47  | 0,13774 | NM_001024     | ---       |
| 7896752 | 0,51 | 1,42 | 0,67512 | -3,05 | -8,29 | 0,00470 | ---           | ---       |
| 8165667 | 0,51 | 1,42 | 0,67512 | -3,05 | -8,29 | 0,00470 | --- HIATL1    | ---       |
| 8162490 | 0,51 | 1,42 | 0,15357 | 0,06  | 1,04  | 0,90234 | NM_032558     | C14orf79  |
| 7977331 | 0,51 | 1,42 | 0,31157 | 1,13  | 2,19  | 0,02465 | NM_174891     | OXSM      |
| 8078300 | 0,51 | 1,42 | 0,21399 | 2,75  | 6,71  | 0,00062 | NM_017897     | TNFSF4    |
| 7922343 | 0,51 | 1,42 | 0,20784 | -0,29 | -1,22 | 0,14971 | NM_003326     | FANCD2    |
| 8077731 | 0,51 | 1,42 | 0,15790 | 2,11  | 4,31  | 0,00158 | NM_033084     | PRKCH     |
| 7974835 | 0,51 | 1,42 | 0,12186 | 3,22  | 9,32  | 0,00002 | NM_006255     | PPIAL4A   |
| 7904997 | 0,50 | 1,42 | 0,55306 | -0,42 | -1,34 | 0,21405 | NM_178230     | PPIAL4A   |
| 7905016 | 0,50 | 1,42 | 0,55306 | -0,42 | -1,34 | 0,21405 | NM_178230     | OSGEPL1   |
| 8057689 | 0,50 | 1,42 | 0,11065 | 1,99  | 3,96  | 0,00100 | NM_022353     | ACAA2     |
| 8023261 | 0,50 | 1,42 | 0,38317 | 0,61  | 1,53  | 0,03949 | NM_006111     | TTBK2     |
| 7987960 | 0,50 | 1,42 | 0,20178 | 1,81  | 3,49  | 0,00039 | NM_173500     | FAM122A   |
| 8155696 | 0,50 | 1,42 | 0,41057 | 1,64  | 3,11  | 0,06467 | NM_138333     | MGC87042  |
| 8138527 | 0,50 | 1,42 | 0,29822 | 2,21  | 4,64  | 0,00222 | NM_207342     | SEN7P     |
| 8089203 | 0,50 | 1,42 | 0,21898 | 0,96  | 1,95  | 0,14188 | NM_020654     | ZNF567    |
| 8028200 | 0,50 | 1,42 | 0,16634 | 0,92  | 1,89  | 0,02478 | NM_152603     | CRAT      |
| 8164535 | 0,50 | 1,42 | 0,01895 | 1,30  | 2,46  | 0,09825 | NM_000755     | HECTD3    |
| 7915659 | 0,50 | 1,42 | 0,21906 | 2,17  | 4,50  | 0,00930 | NM_024602     | C6orf106  |
| 8125850 | 0,50 | 1,41 | 0,23973 | 1,60  | 3,04  | 0,00381 | NM_024294     | C12orf5   |
| 7953211 | 0,50 | 1,41 | 0,40448 | 1,89  | 3,71  | 0,00053 | NM_020375     | CALCRL    |
| 8057578 | 0,50 | 1,41 | 0,09683 | 0,65  | 1,57  | 0,08351 | NM_005795     | HSPE1     |
| 8047223 | 0,50 | 1,41 | 0,02729 | 0,07  | 1,05  | 0,50475 | NM_002157     | C12orf29  |
| 7957467 | 0,50 | 1,41 | 0,39457 | 1,26  | 2,40  | 0,02926 | NM_001009894  | LSM7      |
| 8032480 | 0,50 | 1,41 | 0,41313 | 0,58  | 1,50  | 0,06613 | NM_016199     | ZNF578    |
| 8030944 | 0,50 | 1,41 | 0,06952 | -0,67 | -1,59 | 0,09772 | NM_001099694  | CLPTM1L   |
| 8110803 | 0,50 | 1,41 | 0,37404 | 3,90  | 14,96 | 0,00005 | NM_030782     | KRTAP1-1  |
| 8015196 | 0,50 | 1,41 | 0,10177 | -0,98 | -1,97 | 0,05531 | NM_030967     | KRTAP1-1  |
| 8019578 | 0,50 | 1,41 | 0,10177 | -0,98 | -1,97 | 0,05531 | NM_030967     | FANCF     |
| 7947138 | 0,50 | 1,41 | 0,46574 | -0,33 | -1,26 | 0,08191 | NM_022725     | ADAM32    |
| 8146024 | 0,50 | 1,41 | 0,06947 | -0,06 | -1,04 | 0,81886 | NM_145004     | RBMX2     |
| 8169920 | 0,50 | 1,41 | 0,24025 | 1,24  | 2,35  | 0,09366 | NM_016024     | ARHGEF18  |
| 8025142 | 0,50 | 1,41 | 0,12353 | 0,68  | 1,60  | 0,27713 | NM_001130955  | C1orf151  |
| 7898574 | 0,50 | 1,41 | 0,17262 | 0,40  | 1,32  | 0,30615 | NM_001032363  | RSPH3     |
| 8130528 | 0,50 | 1,41 | 0,24527 | 0,71  | 1,63  | 0,13770 | NM_031924     | DEXI      |
| 7999419 | 0,50 | 1,41 | 0,50656 | 3,67  | 12,69 | 0,00010 | NM_014015     | AAMP      |

|              |              |           |         |       |       |         |              |              |
|--------------|--------------|-----------|---------|-------|-------|---------|--------------|--------------|
| 8058914      | 0,50         | 1,41      | 0,16580 | 1,95  | 3,87  | 0,00398 | NM_001087    | UNC13B       |
| 8154981      | 0,50         | 1,41      | 0,14552 | 2,29  | 4,90  | 0,00010 | NM_006377    | PRELP        |
| 7908924      | 0,50         | 1,41      | 0,11785 | -2,19 | -4,55 | 0,00696 | NM_002725    | NHLRC3       |
| 7968703      | 0,50         | 1,41      | 0,37610 | 2,71  | 6,56  | 0,00030 | NM_001012754 | RUNX2        |
| 8120043      | 0,50         | 1,41      | 0,17617 | 0,14  | 1,10  | 0,40667 | NM_001024630 | SAAL1        |
| 7946957      | 0,50         | 1,41      | 0,19110 | 2,35  | 5,09  | 0,00037 | NM_138421    | F8           |
| 8176193      | 0,50         | 1,41      | 0,27736 | -0,21 | -1,16 | 0,39129 | NM_000132    | PPIG         |
| 8046169      | 0,50         | 1,41      | 0,23515 | 0,63  | 1,55  | 0,13214 | NM_004792    | MTPAP        |
| 7932834      | 0,50         | 1,41      | 0,02627 | 0,69  | 1,61  | 0,01225 | NM_018109    | ABCA6        |
| 8017964      | 0,50         | 1,41      | 0,11261 | -1,05 | -2,07 | 0,00330 | NM_080284    | FAM86C       |
| 7942279      | 0,50         | 1,41      | 0,29559 | 1,26  | 2,40  | 0,00237 | NM_018172    | NAA40        |
| 7940824      | 0,50         | 1,41      | 0,41968 | 2,77  | 6,84  | 0,00005 | NM_024771    | PTGFR        |
| 7902527      | 0,50         | 1,41      | 0,34376 | -0,50 | -1,41 | 0,01603 | NM_001039585 | CDK10        |
| 7997982      | 0,50         | 1,41      | 0,26310 | 2,65  | 6,28  | 0,00005 | NM_052988    | DEPDC1B      |
| 8112260      | 0,50         | 1,41      | 0,07919 | 2,98  | 7,90  | 0,00014 | NM_018369    | ---          |
| 8112180      | 0,50         | 1,41      | 0,17951 | -1,36 | -2,57 | 0,00005 | ---          | TMEM130      |
| 8141228      | 0,49         | 1,41      | 0,14669 | -0,45 | -1,37 | 0,30031 | NM_001134450 | ---          |
| 8165658      | 0,49         | 1,41      | 0,55807 | -2,99 | -7,95 | 0,00745 | ---          | TRIM2        |
| 8097841      | 0,49         | 1,41      | 0,25325 | 1,32  | 2,49  | 0,03200 | NM_015271    | RNF138       |
| 8020814      | 0,49         | 1,41      | 0,01914 | 2,31  | 4,97  | 0,00036 | NM_016271    | N4BP1        |
| 8001317      | 0,49         | 1,41      | 0,13631 | 1,29  | 2,44  | 0,01754 | NM_153029    | ZNF271       |
| 8020898      | 0,49         | 1,41      | 0,06353 | 0,88  | 1,84  | 0,01418 | NR_024565    | FBXL7        |
| 8104592      | 0,49         | 1,41      | 0,04648 | -2,00 | -4,00 | 0,00049 | NM_012304    | RSAD2        |
| 8040080      | 0,49         | 1,41      | 0,36418 | -1,20 | -2,30 | 0,00230 | NM_080657    | CAPN3        |
| 7983054      | 0,49         | 1,41      | 0,16404 | 0,58  | 1,50  | 0,00158 | NR_027911    | FAM174A      |
| 8107119      | 0,49         | 1,41      | 0,07999 | 1,04  | 2,06  | 0,03222 | NM_198507    | GLOD4        |
| 8010949      | 0,49         | 1,41      | 0,19154 | 2,25  | 4,77  | 0,00005 | NM_016080    | ANKLE2       |
| 7967794      | 0,49         | 1,41      | 0,30393 | 1,83  | 3,56  | 0,00495 | NM_015114    | ---          |
| 8012218      | 0,49         | 1,41      | 0,84267 | -3,07 | -8,38 | 0,02580 | ---          | CHCHD1       |
| 7928401      | 0,49         | 1,41      | 0,51875 | 3,23  | 9,40  | 0,00009 | NM_203298    | DCLRE1A      |
| 7936408      | 0,49         | 1,41      | 0,25681 | 2,74  | 6,70  | 0,00063 | NM_014881    | C2orf60      |
| 8058108      | 0,49         | 1,41      | 0,22913 | 2,03  | 4,07  | 0,00673 | NR_004862    | STX5         |
| 7948864      | 0,49         | 1,41      | 0,45717 | 1,81  | 3,50  | 0,00244 | NM_003164    | RPS2         |
| 8013348      | 0,49         | 1,41      | 0,42973 | 1,94  | 3,83  | 0,03100 | NM_002952    | ZNF594       |
| 8011823      | 0,49         | 1,41      | 0,51468 | 2,19  | 4,57  | 0,00250 | NM_032530    | OAZ2         |
| 7989661      | 0,49         | 1,41      | 0,03266 | 1,08  | 2,12  | 0,02925 | NM_002537    | PPP1R1C      |
| 8046746      | 0,49         | 1,41      | 0,30831 | 1,65  | 3,15  | 0,01895 | NM_001080545 | BCL7A        |
| 7959354      | 0,49         | 1,41      | 0,28538 | 2,08  | 4,23  | 0,00687 | NM_020993    | GSTM1        |
| 7903765      | 0,49         | 1,41      | 0,46296 | 2,25  | 4,77  | 0,00086 | NM_000561    | C3orf58      |
| 8083223      | 0,49         | 1,40      | 0,22482 | 2,05  | 4,15  | 0,00752 | NM_173552    | AMACR        |
| 8111430      | 0,49         | 1,40      | 0,32839 | 1,98  | 3,95  | 0,00124 | NM_014324    | ZNF841       |
| 8038949      | 0,49         | 1,40      | 0,34510 | 0,80  | 1,74  | 0,08196 | NM_001136499 | KANK2        |
| 8034130      | 0,49         | 1,40      | 0,04113 | 0,66  | 1,58  | 0,17151 | NM_001136191 | EDF1         |
| 8165309      | 0,49         | 1,40      | 0,32486 | 2,40  | 5,29  | 0,00067 | NM_003792    | C6orf192     |
| 8129649      | 0,49         | 1,40      | 0,11058 | 3,45  | 10,90 | 0,00028 | NM_052831    | ---          |
| 8174251      | 0,49         | 1,40      | 0,29327 | 0,21  | 1,15  | 0,47249 | ---          | ZNF577       |
| 8038904      | 0,49         | 1,40      | 0,18426 | -0,60 | -1,51 | 0,03564 | NM_032679    | ---          |
| 7955979      | 0,49         | 1,40      | 0,45563 | -1,56 | -2,94 | 0,07104 | ---          | SNX29        |
| 7993281      | 0,49         | 1,40      | 0,11082 | 0,94  | 1,91  | 0,01976 | NM_001080530 | DUSP19       |
| 8046792      | 0,49         | 1,40      | 0,11912 | -0,20 | -1,15 | 0,37438 | NM_080876    | RAB24        |
| 8115997      | 0,49         | 1,40      | 0,09436 | 0,55  | 1,46  | 0,39887 | NM_001031677 | C15orf51     |
| 7991512      | 0,49         | 1,40      | 0,49384 | -1,82 | -3,52 | 0,01716 | NR_003260    | PALM2-AKAP2  |
| 8157153      | 0,48         | 1,40      | 0,27721 | 1,16  | 2,23  | 0,02037 | NM_007203    | SF3B4        |
| 7919659      | 0,48         | 1,40      | 0,15162 | 1,58  | 2,98  | 0,00010 | NM_005850    | IL7          |
| 8151447      | 0,48         | 1,40      | 0,21885 | -1,61 | -3,06 | 0,00082 | NM_000880    | ---          |
| 7974402      | 0,48         | 1,40      | 0,15522 | 0,36  | 1,29  | 0,03901 | ---          | SYNJ2        |
| 8123006      | 0,48         | 1,40      | 0,29132 | 1,23  | 2,35  | 0,00064 | NM_003898    | ZNF140       |
| 7960150      | 0,48         | 1,40      | 0,20938 | 2,48  | 5,57  | 0,00311 | NM_003440    | IFIH1        |
| 8056285      | 0,48         | 1,40      | 0,18670 | -0,07 | -1,05 | 0,65091 | NM_022168    | DDX10        |
| 7943690      | 0,48         | 1,40      | 0,14260 | 2,58  | 5,99  | 0,00170 | NM_004398    | CCDC146      |
| 8133770      | 0,48         | 1,40      | 0,23108 | 1,38  | 2,61  | 0,01453 | NM_020879    | ADO          |
| 7927767      | 0,48         | 1,40      | 0,09932 | 0,81  | 1,76  | 0,00723 | NM_032804    | NAGA         |
| 8076403      | 0,48         | 1,40      | 0,46581 | 1,90  | 3,72  | 0,01064 | NM_000262    | CDC25A       |
| 8086880      | 0,48         | 1,40      | 0,07750 | 1,54  | 2,92  | 0,00035 | NM_001789    | GPR146       |
| 8131067      | 0,48         | 1,40      | 0,04152 | 0,52  | 1,43  | 0,07867 | NM_138445    | AMY2A        |
| 7903414      | 0,48         | 1,40      | 0,59629 | -1,25 | -2,37 | 0,02412 | NM_000699    | LOC389834 // |
| LOC389834 // | LOC389834 // | LOC389834 |         |       |       |         |              |              |
| 8104139      | 0,48         | 1,39      | 0,00084 | 0,07  | 1,05  | 0,68815 | NR_027420 // | NR_027420 // |
| // NR_027420 |              | MLLT4     |         |       |       |         |              |              |
| 8123407      | 0,48         | 1,39      | 0,04222 | 2,89  | 7,40  | 0,00171 | NM_001040001 | BID          |
| 8074261      | 0,48         | 1,39      | 0,24004 | 1,95  | 3,86  | 0,00343 | NM_197966    | FAM96A       |
| 7989611      | 0,48         | 1,39      | 0,40918 | 1,93  | 3,81  | 0,00774 | NM_032231    | RBM45        |
| 8046628      | 0,48         | 1,39      | 0,37916 | 1,06  | 2,09  | 0,03455 | NM_152945    | TSC22D4      |

|         |      |      |         |       |       |         |              |           |
|---------|------|------|---------|-------|-------|---------|--------------|-----------|
| 8141526 | 0,48 | 1,39 | 0,02852 | -0,54 | -1,45 | 0,26260 | NM_030935    | ADORA2B   |
| 8005134 | 0,48 | 1,39 | 0,44689 | 1,16  | 2,23  | 0,01283 | NM_000676    | NDUFV1    |
| 7941946 | 0,48 | 1,39 | 0,09889 | 1,93  | 3,80  | 0,00775 | NM_007103    | MTHFD1L   |
| 8122773 | 0,48 | 1,39 | 0,36281 | 1,68  | 3,20  | 0,01840 | NM_015440    | GMNN      |
| 8117225 | 0,48 | 1,39 | 0,01650 | 2,82  | 7,04  | 0,00342 | NM_015895    | LOC401397 |
| 8142431 | 0,48 | 1,39 | 0,31272 | 0,81  | 1,75  | 0,00502 | NR_024412    | IGFBP2    |
| 8048205 | 0,48 | 1,39 | 0,39284 | -0,61 | -1,53 | 0,30164 | NM_000597    | CCDC124   |
| 8026895 | 0,48 | 1,39 | 0,20035 | 2,48  | 5,58  | 0,00712 | NM_138442    | TMEM25    |
| 7944275 | 0,48 | 1,39 | 0,42686 | 1,19  | 2,27  | 0,04619 | NM_032780    | COX18     |
| 8100893 | 0,48 | 1,39 | 0,51694 | 1,83  | 3,56  | 0,00028 | NM_173827    | SLC12A4   |
| 8002152 | 0,48 | 1,39 | 0,06397 | 1,79  | 3,46  | 0,00852 | NM_005072    | FGFR1OP2  |
| 7954492 | 0,48 | 1,39 | 0,16818 | 0,89  | 1,85  | 0,00172 | NM_015633    | CNNM2     |
| 7930194 | 0,48 | 1,39 | 0,04679 | 1,66  | 3,16  | 0,00015 | NM_017649    | DCTPP1    |
| 8000884 | 0,48 | 1,39 | 0,18339 | 2,60  | 6,06  | 0,01029 | NM_024096    | LARS2     |
| 8079311 | 0,48 | 1,39 | 0,43361 | 1,40  | 2,64  | 0,00347 | NM_015340    | CHST10    |
| 8054297 | 0,48 | 1,39 | 0,06412 | 1,56  | 2,94  | 0,00047 | NM_004854    | C14orf169 |
| 7975595 | 0,47 | 1,39 | 0,23641 | 0,71  | 1,64  | 0,06713 | NM_024644    | FMO3      |
| 7907249 | 0,47 | 1,39 | 0,14076 | -1,32 | -2,50 | 0,00473 | NM_006894    | YWHAQP8   |
| 8174026 | 0,47 | 1,39 | 0,16447 | 1,96  | 3,88  | 0,01979 | DQ145510     | TRIM28    |
| 8031913 | 0,47 | 1,39 | 0,33087 | 3,15  | 8,87  | 0,00047 | NM_005762    | ---       |
| 7922754 | 0,47 | 1,39 | 0,21038 | 0,68  | 1,60  | 0,00658 | ---          | CHPF2     |
| 8137404 | 0,47 | 1,39 | 0,38617 | 1,36  | 2,57  | 0,00821 | NM_019015    | UROD      |
| 7901073 | 0,47 | 1,39 | 0,27079 | 1,36  | 2,57  | 0,01490 | NM_000374    | SSRP1     |
| 7948192 | 0,47 | 1,39 | 0,26654 | 3,27  | 9,61  | 0,00015 | NM_003146    | SCYL3     |
| 7907183 | 0,47 | 1,39 | 0,23303 | 1,05  | 2,07  | 0,07220 | NM_181093    | KAT2A     |
| 8015526 | 0,47 | 1,39 | 0,18821 | 2,64  | 6,22  | 0,00463 | NM_021078    | ULK4      |
| 8086352 | 0,47 | 1,39 | 0,16108 | -0,01 | -1,01 | 0,94818 | NM_017886    | C1orf201  |
| 7913787 | 0,47 | 1,39 | 0,16251 | 1,13  | 2,18  | 0,00909 | BC063891     | RUNX1T1   |
| 8151768 | 0,47 | 1,39 | 0,23932 | -1,23 | -2,34 | 0,00449 | NM_175634    | FIGLN1    |
| 8139632 | 0,47 | 1,39 | 0,17766 | 1,70  | 3,26  | 0,02036 | NM_001042762 | DMAP1     |
| 7900962 | 0,47 | 1,39 | 0,19477 | 1,43  | 2,69  | 0,00330 | NM_019100    | FBXO27    |
| 8036689 | 0,47 | 1,39 | 0,42512 | 4,02  | 16,22 | 0,00002 | NM_178820    | ---       |
| 8071804 | 0,47 | 1,39 | 0,53898 | 0,18  | 1,13  | 0,78126 | ---          | CDK5RAP3  |
| 8008074 | 0,47 | 1,39 | 0,09957 | 0,94  | 1,91  | 0,09058 | NM_176096    | ---       |
| 8151709 | 0,47 | 1,39 | 0,43424 | -0,76 | -1,70 | 0,21077 | ---          | STRADA    |
| 8017402 | 0,47 | 1,38 | 0,36022 | 1,05  | 2,08  | 0,02006 | NM_153335    | METTL10   |
| 7936891 | 0,47 | 1,38 | 0,38117 | 2,75  | 6,74  | 0,00600 | NM_212554    | ZC3H6     |
| 8044450 | 0,47 | 1,38 | 0,41488 | 1,72  | 3,29  | 0,00103 | NM_198581    | CABLES2   |
| 8067495 | 0,47 | 1,38 | 0,41927 | 2,64  | 6,24  | 0,00265 | NM_031215    | ZNF658    |
| 8161326 | 0,47 | 1,38 | 0,00298 | 0,29  | 1,22  | 0,35315 | NM_033160    | LRTOMT    |
| 7942315 | 0,47 | 1,38 | 0,22344 | -0,24 | -1,18 | 0,52192 | NM_001145309 | VPSS3     |
| 8010918 | 0,47 | 1,38 | 0,18382 | 0,82  | 1,76  | 0,00722 | NM_001128159 | C3orf62   |
| 8087374 | 0,47 | 1,38 | 0,19313 | 1,74  | 3,34  | 0,00010 | NM_198562    | ZNF394    |
| 8141305 | 0,47 | 1,38 | 0,37164 | 0,56  | 1,47  | 0,14292 | NM_032164    | PUS10     |
| 8052418 | 0,47 | 1,38 | 0,14174 | -0,13 | -1,10 | 0,72012 | NM_144709    | MIDN      |
| 8024228 | 0,47 | 1,38 | 0,40321 | 2,17  | 4,51  | 0,00408 | NM_177401    | PTPDC1    |
| 8156506 | 0,47 | 1,38 | 0,20544 | 2,74  | 6,68  | 0,00136 | NM_152422    | KIAA1377  |
| 7943376 | 0,47 | 1,38 | 0,03076 | -0,34 | -1,26 | 0,12371 | NM_020802    | LOXL4     |
| 7935553 | 0,47 | 1,38 | 0,01800 | -0,21 | -1,15 | 0,47989 | NM_032211    | CUX1      |
| 8135114 | 0,47 | 1,38 | 0,06009 | 0,78  | 1,72  | 0,00251 | NM_181552    | ---       |
| 8098506 | 0,47 | 1,38 | 0,13105 | 0,77  | 1,71  | 0,00280 | ---          | KAL1      |
| 8171248 | 0,47 | 1,38 | 0,11628 | 0,83  | 1,77  | 0,01991 | NM_000216    | PROSC     |
| 8145854 | 0,47 | 1,38 | 0,16656 | 1,67  | 3,19  | 0,00045 | NM_007198    | ESF1      |
| 8065032 | 0,46 | 1,38 | 0,01319 | 1,03  | 2,04  | 0,05718 | NM_016649    | NPIPL3    |
| 7994026 | 0,46 | 1,38 | 0,66441 | 1,08  | 2,11  | 0,00496 | NM_130464    | CCDC126   |
| 8131871 | 0,46 | 1,38 | 0,42616 | 1,69  | 3,23  | 0,00454 | NM_138771    | ACO2      |
| 8073430 | 0,46 | 1,38 | 0,46380 | 2,19  | 4,57  | 0,00215 | NM_001098    | H2AFZ     |
| 8101945 | 0,46 | 1,38 | 0,08499 | 1,97  | 3,91  | 0,00855 | NM_002106    | DUT       |
| 7983594 | 0,46 | 1,38 | 0,12713 | 1,17  | 2,24  | 0,00855 | NM_001025248 | TET2      |
| 8096669 | 0,46 | 1,38 | 0,13326 | 0,13  | 1,09  | 0,59497 | NM_017628    | ARRB2     |
| 8003903 | 0,46 | 1,38 | 0,24712 | 2,86  | 7,26  | 0,00134 | NM_004313    | NUDT4     |
| 7957536 | 0,46 | 1,38 | 0,41692 | -0,75 | -1,68 | 0,00426 | NM_019094    | ABT1      |
| 8117522 | 0,46 | 1,38 | 0,38273 | 1,57  | 2,97  | 0,02007 | NM_013375    | FAM133B   |
| 8055978 | 0,46 | 1,38 | 0,20590 | 0,38  | 1,30  | 0,02300 | NM_152789    | PRPF3     |
| 7905171 | 0,46 | 1,38 | 0,06443 | 2,58  | 5,98  | 0,00332 | NM_004698    | BMS1P1    |
| 7933290 | 0,46 | 1,38 | 0,27784 | 2,05  | 4,13  | 0,00018 | NR_026566    | FGF1      |
| 8114805 | 0,46 | 1,38 | 0,26103 | -0,98 | -1,98 | 0,02202 | NM_000800    | GDPD1     |
| 8008802 | 0,46 | 1,38 | 0,18898 | 1,47  | 2,77  | 0,00506 | NM_182569    | RGNEF     |
| 8106210 | 0,46 | 1,38 | 0,15405 | 2,15  | 4,45  | 0,00131 | NM_001080479 | NPAS3     |
| 7973875 | 0,46 | 1,38 | 0,10053 | -2,15 | -4,45 | 0,00040 | NM_001164749 | ---       |
| 7979694 | 0,46 | 1,38 | 0,35891 | 0,15  | 1,11  | 0,44775 | ---          | PLXND1    |
| 8090591 | 0,46 | 1,38 | 0,22386 | 1,11  | 2,15  | 0,05129 | NM_015103    | SNORA70   |
| 8170863 | 0,46 | 1,38 | 0,28322 | 4,63  | 24,75 | 0,00001 | NR_000011    | ---       |

|         |      |      |         |       |       |         |                 |              |  |
|---------|------|------|---------|-------|-------|---------|-----------------|--------------|--|
| 8104625 | 0,46 | 1,38 | 0,05385 | 0,75  | 1,68  | 0,03313 | ---             | HSPA1B       |  |
| 8118314 | 0,46 | 1,38 | 0,16055 | 1,88  | 3,69  | 0,03988 | NM_005346       | APTX         |  |
| 8160602 | 0,46 | 1,37 | 0,26881 | 1,95  | 3,88  | 0,00159 | NM_175069       | ZNF658       |  |
| 8161346 | 0,46 | 1,37 | 0,00461 | 0,42  | 1,34  | 0,21728 | NM_033160       | TMPO         |  |
| 7957737 | 0,46 | 1,37 | 0,36925 | 2,56  | 5,90  | 0,00031 | NM_001032283    | ZNF35        |  |
| 8079217 | 0,46 | 1,37 | 0,20480 | 0,05  | 1,04  | 0,85408 | NM_003420       | STX16        |  |
| 8063636 | 0,46 | 1,37 | 0,33302 | 1,44  | 2,71  | 0,01834 | NM_001001433    | SIPA1L2      |  |
| 7925062 | 0,46 | 1,37 | 0,02125 | 0,48  | 1,39  | 0,25462 | NM_020808       | C17orf42     |  |
| 8014047 | 0,46 | 1,37 | 0,11893 | 0,87  | 1,83  | 0,10833 | NM_024683       | ---          |  |
| 7924893 | 0,46 | 1,37 | 0,51161 | -0,44 | -1,36 | 0,05228 | ---             | LOC100289668 |  |
| 7986515 | 0,46 | 1,37 | 0,85197 | -1,27 | -2,41 | 0,34210 | ENST00000417911 | LOC100289668 |  |
| 7986525 | 0,46 | 1,37 | 0,85197 | -1,27 | -2,41 | 0,34210 | ENST00000417911 | PYGO2        |  |
| 7920594 | 0,46 | 1,37 | 0,01928 | 2,27  | 4,81  | 0,00475 | NM_138300       | ANKRD26      |  |
| 7932637 | 0,46 | 1,37 | 0,08913 | 0,13  | 1,10  | 0,48981 | NM_014915       | BAIAP2       |  |
| 8010562 | 0,46 | 1,37 | 0,41580 | 0,98  | 1,97  | 0,05510 | NM_006340       | CRYL1        |  |
| 7970455 | 0,45 | 1,37 | 0,23538 | 0,72  | 1,65  | 0,00948 | NM_015974       | SLC2A13      |  |
| 7962327 | 0,45 | 1,37 | 0,03956 | 0,62  | 1,54  | 0,10333 | NM_052885       | NPIPL3       |  |
| 8000676 | 0,45 | 1,37 | 0,65853 | 1,00  | 2,00  | 0,00745 | NM_130464       | SYTL5        |  |
| 8166747 | 0,45 | 1,37 | 0,19390 | -0,36 | -1,28 | 0,08048 | NM_138780       | ABCA5        |  |
| 8018038 | 0,45 | 1,37 | 0,20082 | 0,00  | 1,00  | 0,99414 | NM_018672       | ARHGAP31     |  |
| 8081838 | 0,45 | 1,37 | 0,29804 | -0,84 | -1,79 | 0,06067 | NM_020754       | PDXDC2       |  |
| 7997239 | 0,45 | 1,37 | 0,59246 | 1,46  | 2,75  | 0,01126 | NR_003610       | MARK4        |  |
| 8029642 | 0,45 | 1,37 | 0,21031 | 1,22  | 2,33  | 0,02859 | NM_031417       | ZNF501       |  |
| 8079229 | 0,45 | 1,37 | 0,36357 | 0,31  | 1,24  | 0,49067 | NM_145044       | C9orf102     |  |
| 8156581 | 0,45 | 1,37 | 0,29473 | 2,47  | 5,53  | 0,00031 | NM_001010895    | ERCC1        |  |
| 8037579 | 0,45 | 1,37 | 0,29802 | 0,96  | 1,94  | 0,00157 | NM_202001       | DDX50        |  |
| 7927926 | 0,45 | 1,37 | 0,50806 | -0,25 | -1,19 | 0,78007 | NM_024045       | IDH3B        |  |
| 8064522 | 0,45 | 1,37 | 0,10691 | 1,95  | 3,87  | 0,01176 | NM_174856       | AMPD3        |  |
| 7938396 | 0,45 | 1,37 | 0,33203 | -0,10 | -1,07 | 0,68865 | NM_000480       | POLR3E       |  |
| 7993973 | 0,45 | 1,37 | 0,13914 | 2,07  | 4,19  | 0,00065 | NM_018119       | HSPA1B       |  |
| 8178086 | 0,45 | 1,37 | 0,20886 | 1,71  | 3,28  | 0,04410 | NM_005346       | HSPA1B       |  |
| 8179324 | 0,45 | 1,37 | 0,20886 | 1,71  | 3,28  | 0,04410 | NM_005346       | ETHE1        |  |
| 8037322 | 0,45 | 1,36 | 0,37938 | 1,46  | 2,75  | 0,01600 | NM_014297       | ---          |  |
| 8125123 | 0,45 | 1,36 | 0,79857 | -0,93 | -1,91 | 0,07071 | ---             | RPS12        |  |
| 8122136 | 0,45 | 1,36 | 0,11294 | -0,21 | -1,15 | 0,50792 | NM_001016       | RAE1         |  |
| 8063566 | 0,45 | 1,36 | 0,51300 | 2,34  | 5,07  | 0,00039 | NM_003610       | PHF11        |  |
| 7969129 | 0,45 | 1,36 | 0,40379 | 1,09  | 2,13  | 0,01086 | NM_001040443    | MRPS33       |  |
| 8143433 | 0,45 | 1,36 | 0,28053 | 0,42  | 1,34  | 0,12848 | NM_016071       | LYPD1        |  |
| 8055314 | 0,45 | 1,36 | 0,13136 | -0,62 | -1,54 | 0,15321 | NM_144586       | LCORL        |  |
| 8099581 | 0,45 | 1,36 | 0,11467 | 1,01  | 2,02  | 0,02572 | NM_153686       | RNU5E        |  |
| 7897801 | 0,45 | 1,36 | 0,14710 | 0,73  | 1,66  | 0,08257 | NR_002754       | FBXO45       |  |
| 8084947 | 0,45 | 1,36 | 0,28012 | 1,64  | 3,12  | 0,00046 | NM_001105573    | TMEM218      |  |
| 7952484 | 0,44 | 1,36 | 0,44365 | 2,73  | 6,66  | 0,00226 | NM_001080546    | NPIPL3       |  |
| 8000205 | 0,44 | 1,36 | 0,66463 | 0,86  | 1,82  | 0,00959 | NM_130464       | KCTD11       |  |
| 8004360 | 0,44 | 1,36 | 0,12156 | 0,34  | 1,27  | 0,45345 | NM_001002914    | C1GALT1C1    |  |
| 8174820 | 0,44 | 1,36 | 0,47470 | 0,08  | 1,06  | 0,72909 | NM_152692       | SPDYE7P      |  |
| 8139943 | 0,44 | 1,36 | 0,50175 | -0,37 | -1,29 | 0,52574 | NR_003666       | SLC35E1      |  |
| 8035177 | 0,44 | 1,36 | 0,06652 | 2,91  | 7,52  | 0,00108 | NM_024881       | ---          |  |
| 7985930 | 0,44 | 1,36 | 0,42753 | -1,26 | -2,40 | 0,02804 | ---             | RPGRIP1L     |  |
| 8001423 | 0,44 | 1,36 | 0,47853 | 0,39  | 1,31  | 0,06171 | NM_015272       | SLC25A44     |  |
| 7906128 | 0,44 | 1,36 | 0,10419 | 1,53  | 2,89  | 0,00012 | NM_014655       | IKZF2        |  |
| 8058670 | 0,44 | 1,36 | 0,23756 | -0,08 | -1,06 | 0,75071 | NM_016260       | CRCP         |  |
| 8133145 | 0,44 | 1,36 | 0,21456 | 0,61  | 1,53  | 0,00607 | NM_014478       | ADRB3        |  |
| 8150249 | 0,44 | 1,36 | 0,16218 | -1,42 | -2,68 | 0,01195 | NM_000025       | TGDS         |  |
| 7972269 | 0,44 | 1,36 | 0,20428 | 0,48  | 1,40  | 0,01836 | NM_014305       | TTC1         |  |
| 8109620 | 0,44 | 1,36 | 0,15569 | -0,04 | -1,03 | 0,91284 | NM_003314       | KDM5C        |  |
| 8172827 | 0,44 | 1,36 | 0,03371 | 2,17  | 4,49  | 0,00070 | NM_004187       | DIDO1        |  |
| 8067563 | 0,44 | 1,36 | 0,37188 | 0,64  | 1,56  | 0,21028 | NM_033081       | DLC1         |  |
| 8149413 | 0,44 | 1,36 | 0,23647 | -0,33 | -1,25 | 0,05234 | NM_182643       | DNM3         |  |
| 7907370 | 0,44 | 1,36 | 0,13434 | 0,24  | 1,18  | 0,37091 | NM_015569       | PSMG4        |  |
| 8116655 | 0,44 | 1,36 | 0,13391 | 0,53  | 1,45  | 0,22044 | NM_001128592    | ---          |  |
| 8078378 | 0,44 | 1,36 | 0,10440 | 0,17  | 1,13  | 0,55439 | ---             | ZC3HC1       |  |
| 8142899 | 0,44 | 1,36 | 0,29117 | 1,42  | 2,68  | 0,02496 | NM_016478       | SELPLG       |  |
| 7966127 | 0,44 | 1,35 | 0,12122 | 1,69  | 3,22  | 0,00174 | NM_003006       | CDK5         |  |
| 8143850 | 0,44 | 1,35 | 0,17328 | 1,85  | 3,61  | 0,00049 | NM_004935       | C18orf25     |  |
| 8021113 | 0,44 | 1,35 | 0,35543 | 0,35  | 1,28  | 0,49808 | NM_145055       | FRAS1        |  |
| 8095907 | 0,44 | 1,35 | 0,13026 | 2,61  | 6,10  | 0,00039 | NM_025074       | TNRC6C       |  |
| 8010188 | 0,44 | 1,35 | 0,21435 | 1,60  | 3,03  | 0,00073 | NM_001142640    | AKIRIN1      |  |
| 7900216 | 0,44 | 1,35 | 0,20031 | 0,30  | 1,23  | 0,21850 | NM_024595       | ---          |  |
| 8071819 | 0,44 | 1,35 | 0,43742 | -0,17 | -1,12 | 0,60043 | ---             | PLXNC1       |  |
| 7957570 | 0,44 | 1,35 | 0,04276 | -0,16 | -1,12 | 0,66605 | NM_005761       | TAF9         |  |
| 8112458 | 0,44 | 1,35 | 0,06809 | 1,26  | 2,40  | 0,00892 | NM_003187       | DHTKD1       |  |
| 7926170 | 0,43 | 1,35 | 0,45925 | 2,17  | 4,50  | 0,00254 | NM_018706       | IMP3         |  |

|         |      |      |         |       |       |         |              |           |
|---------|------|------|---------|-------|-------|---------|--------------|-----------|
| 7990540 | 0,43 | 1,35 | 0,38661 | 0,30  | 1,23  | 0,51103 | NM_018285    | RTTN      |
| 8023766 | 0,43 | 1,35 | 0,39859 | 1,41  | 2,65  | 0,00435 | NM_173630    | PRKCDBP   |
| 7946142 | 0,43 | 1,35 | 0,56641 | -0,06 | -1,04 | 0,80821 | NM_145040    | TMED10P1  |
| 8148949 | 0,43 | 1,35 | 0,33739 | 1,08  | 2,12  | 0,02440 | NR_002807    | BSYL      |
| 8119492 | 0,43 | 1,35 | 0,11852 | 1,53  | 2,90  | 0,00052 | NM_004053    | ---       |
| 7932794 | 0,43 | 1,35 | 0,24648 | -0,91 | -1,88 | 0,28113 | --- TBX5     | ---       |
| 7966668 | 0,43 | 1,35 | 0,29554 | -1,64 | -3,11 | 0,04908 | NM_181486    | TXNRD3    |
| 8090395 | 0,43 | 1,35 | 0,26477 | 1,06  | 2,09  | 0,00635 | NM_052883    | ---       |
| 8117576 | 0,43 | 1,35 | 0,09282 | 0,40  | 1,32  | 0,18542 | --- CDK9     | ---       |
| 8158112 | 0,43 | 1,35 | 0,21877 | 3,09  | 8,50  | 0,00329 | NM_001261    | AVP11     |
| 7935521 | 0,43 | 1,35 | 0,31755 | 2,51  | 5,69  | 0,01412 | NM_021732    | ZNF230    |
| 8029347 | 0,43 | 1,35 | 0,04745 | 0,48  | 1,39  | 0,15290 | NM_006300    | ---       |
| 8150149 | 0,43 | 1,35 | 0,51035 | -0,14 | -1,10 | 0,62454 | --- TPI1     | ---       |
| 7953508 | 0,43 | 1,35 | 0,63964 | 1,23  | 2,34  | 0,16192 | NM_000365    | ABCC3     |
| 8008454 | 0,43 | 1,35 | 0,21218 | 3,99  | 15,85 | 0,00008 | NM_003786    | DDX49     |
| 8027100 | 0,43 | 1,35 | 0,29698 | -0,07 | -1,05 | 0,84070 | NM_019070    | TPX2      |
| 8061579 | 0,43 | 1,35 | 0,43311 | 2,69  | 6,44  | 0,00105 | NM_012112    | GALNTL2   |
| 8078155 | 0,43 | 1,35 | 0,03306 | -0,47 | -1,39 | 0,04344 | NM_054110    | NPIP      |
| 7999766 | 0,43 | 1,35 | 0,68875 | -0,33 | -1,26 | 0,26520 | NM_006985    | UPF0639   |
| 7975354 | 0,43 | 1,35 | 0,52552 | -0,31 | -1,24 | 0,22092 | NM_001161498 | LIN37     |
| 8028004 | 0,43 | 1,35 | 0,38194 | 1,28  | 2,42  | 0,02118 | NM_019104    | ZBTB6     |
| 8163999 | 0,43 | 1,34 | 0,10572 | 2,00  | 4,00  | 0,00202 | NM_006626    | RAB11FIP1 |
| 8150225 | 0,43 | 1,34 | 0,09693 | 0,34  | 1,26  | 0,34459 | NM_001002814 | RBM25     |
| 7975521 | 0,43 | 1,34 | 0,28978 | 0,74  | 1,68  | 0,01255 | NM_021239    | FAM59A    |
| 8022803 | 0,43 | 1,34 | 0,38216 | 0,82  | 1,77  | 0,00072 | NM_022751    | LDLRAD3   |
| 7939376 | 0,43 | 1,34 | 0,33823 | 1,16  | 2,24  | 0,06276 | NM_174902    | AMY1A     |
| 7903425 | 0,42 | 1,34 | 0,54571 | -0,99 | -1,99 | 0,02784 | NM_004038    | AMY1A     |
| 7903440 | 0,42 | 1,34 | 0,54571 | -0,99 | -1,99 | 0,02784 | NM_004038    | AMY1A     |
| 7918134 | 0,42 | 1,34 | 0,54571 | -0,99 | -1,99 | 0,02784 | NM_004038    | ACP6      |
| 7919326 | 0,42 | 1,34 | 0,22843 | 2,69  | 6,46  | 0,00037 | NM_016361    | DPH2      |
| 7900911 | 0,42 | 1,34 | 0,11594 | 1,32  | 2,50  | 0,08855 | NM_001384    | KLRAQ1    |
| 8041913 | 0,42 | 1,34 | 0,02764 | 1,55  | 2,92  | 0,00009 | NR_024188    | CCDC3     |
| 7932082 | 0,42 | 1,34 | 0,21312 | 0,64  | 1,55  | 0,13836 | NM_031455    | LOC147804 |
| 8030991 | 0,42 | 1,34 | 0,66021 | 2,17  | 4,51  | 0,02517 | NR_003148    | ARHGAP32  |
| 7952641 | 0,42 | 1,34 | 0,22367 | 2,67  | 6,38  | 0,00024 | NM_001142685 | DHX58     |
| 8015511 | 0,42 | 1,34 | 0,53208 | -1,15 | -2,21 | 0,07409 | NM_024119    | TCEANC    |
| 8166096 | 0,42 | 1,34 | 0,40915 | -0,42 | -1,33 | 0,31912 | NM_152634    | GCH1      |
| 7979269 | 0,42 | 1,34 | 0,42977 | 1,06  | 2,08  | 0,00375 | NM_000161    | ANGEL1    |
| 7980327 | 0,42 | 1,34 | 0,52057 | 2,65  | 6,26  | 0,00139 | NM_015305    | TUBGCP2   |
| 7937175 | 0,42 | 1,34 | 0,04600 | 2,19  | 4,56  | 0,00095 | NM_006659    | DAGLB     |
| 8138091 | 0,42 | 1,34 | 0,02796 | 2,31  | 4,97  | 0,00364 | NM_139179    | TBX3      |
| 7966690 | 0,42 | 1,34 | 0,23707 | -0,37 | -1,29 | 0,30977 | NM_016569    | TCEB2     |
| 7998852 | 0,42 | 1,34 | 0,07497 | 1,71  | 3,28  | 0,00348 | NM_007108    | ODF2L     |
| 7917433 | 0,42 | 1,34 | 0,32134 | 0,79  | 1,73  | 0,05412 | NM_020729    | ZNF658    |
| 8161319 | 0,42 | 1,34 | 0,00429 | 0,41  | 1,33  | 0,21670 | NM_033160    | COG7      |
| 8000263 | 0,42 | 1,34 | 0,51196 | 1,99  | 3,98  | 0,01734 | NM_153603    | AMIGO2    |
| 7962579 | 0,42 | 1,34 | 0,19298 | 2,25  | 4,75  | 0,00636 | NM_001143668 | PRMT3     |
| 7938890 | 0,42 | 1,34 | 0,48465 | 1,91  | 3,77  | 0,00029 | NM_005788    | NBPF16    |
| 7919438 | 0,42 | 1,34 | 0,74127 | -0,31 | -1,24 | 0,32175 | NM_001102663 | RPL37A    |
| 8048195 | 0,42 | 1,34 | 0,11864 | 1,17  | 2,25  | 0,00595 | NM_000998    | NR1H2     |
| 8030630 | 0,42 | 1,34 | 0,35589 | 2,11  | 4,32  | 0,01205 | NM_007121    | NCAM2     |
| 8067985 | 0,42 | 1,34 | 0,33324 | -0,59 | -1,51 | 0,00114 | NM_004540    | ---       |
| 7905481 | 0,42 | 1,34 | 0,29312 | 0,55  | 1,47  | 0,51793 | --- ZNF285   | ---       |
| 8037459 | 0,42 | 1,34 | 0,40922 | 0,40  | 1,32  | 0,36148 | NM_152354    | PRCC      |
| 7906235 | 0,42 | 1,34 | 0,28880 | 2,10  | 4,29  | 0,00385 | NM_005973    | CISD2     |
| 8096663 | 0,42 | 1,33 | 0,32905 | 2,80  | 6,97  | 0,00686 | NM_001008388 | MYOC      |
| 7922301 | 0,42 | 1,33 | 0,44685 | -0,41 | -1,33 | 0,19930 | NM_000261    | PLCD3     |
| 8016168 | 0,42 | 1,33 | 0,29588 | 1,62  | 3,07  | 0,01791 | NM_133373    | MCAT      |
| 8076563 | 0,42 | 1,33 | 0,19363 | 2,31  | 4,96  | 0,00187 | NM_173467    | ATP9A     |
| 8067055 | 0,41 | 1,33 | 0,31735 | 1,79  | 3,46  | 0,00084 | NM_006045    | C1D       |
| 7934729 | 0,41 | 1,33 | 0,40216 | 0,68  | 1,61  | 0,47121 | NM_006333    | GAS1      |
| 8162179 | 0,41 | 1,33 | 0,33486 | -1,43 | -2,69 | 0,00062 | NM_002048    | TIMM13    |
| 8032484 | 0,41 | 1,33 | 0,27997 | 2,05  | 4,14  | 0,01088 | NM_012458    | C2orf67   |
| 8058570 | 0,41 | 1,33 | 0,08466 | -0,15 | -1,11 | 0,45490 | NM_152519    | PDSS2     |
| 8128626 | 0,41 | 1,33 | 0,10670 | 0,92  | 1,89  | 0,03121 | NM_020381    | PKIB      |
| 8121768 | 0,41 | 1,33 | 0,51624 | 0,43  | 1,35  | 0,33288 | NM_181794    | RHEB      |
| 7927285 | 0,41 | 1,33 | 0,40114 | 2,68  | 6,41  | 0,00015 | NM_005614    | BUB1B     |
| 7982663 | 0,41 | 1,33 | 0,25541 | 3,80  | 13,96 | 0,00032 | NM_001211    | CBWD5     |
| 8161575 | 0,41 | 1,33 | 0,24862 | 0,44  | 1,36  | 0,06112 | NM_001024916 | ---       |
| 7967870 | 0,41 | 1,33 | 0,39040 | 1,57  | 2,97  | 0,02625 | --- PHF14    | ---       |
| 8131519 | 0,41 | 1,33 | 0,09409 | 2,17  | 4,50  | 0,00085 | NM_014660    | ---       |
| 7918900 | 0,41 | 1,33 | 0,43426 | 0,56  | 1,48  | 0,33358 | --- RTP4     | ---       |
| 8084732 | 0,41 | 1,33 | 0,39167 | -0,62 | -1,54 | 0,09774 | NM_022147    | HSPA14    |

|         |      |      |         |       |       |         |              |           |
|---------|------|------|---------|-------|-------|---------|--------------|-----------|
| 7926299 | 0,41 | 1,33 | 0,03404 | 1,65  | 3,14  | 0,01405 | NM_016299    | NPIPL3    |
| 8000131 | 0,41 | 1,33 | 0,68542 | 0,87  | 1,82  | 0,00896 | NM_130464    | METT5D1   |
| 8091656 | 0,41 | 1,33 | 0,21413 | 2,95  | 7,73  | 0,00010 | NM_001113528 | SIGLEC9   |
| 8030782 | 0,41 | 1,33 | 0,52340 | -0,65 | -1,57 | 0,07462 | NM_014441    | KIAA1549  |
| 8143247 | 0,41 | 1,33 | 0,34236 | 0,62  | 1,54  | 0,17808 | NM_020910    | COLEC12   |
| 8021946 | 0,41 | 1,33 | 0,57128 | -1,48 | -2,79 | 0,00727 | NM_130386    | BRCA1     |
| 8015769 | 0,41 | 1,33 | 0,37427 | 2,39  | 5,25  | 0,00545 | NR_027676    | CAPN1     |
| 7941179 | 0,41 | 1,33 | 0,24149 | 2,17  | 4,51  | 0,01968 | NM_005186    | POP1      |
| 8147548 | 0,41 | 1,33 | 0,12072 | 0,13  | 1,10  | 0,73998 | NM_001145860 | RFK       |
| 8161857 | 0,41 | 1,33 | 0,40513 | 2,90  | 7,49  | 0,00068 | NM_018339    | OLR1      |
| 7961142 | 0,41 | 1,33 | 0,17287 | -1,05 | -2,06 | 0,07816 | NM_002543    | ECM2      |
| 8162404 | 0,41 | 1,33 | 0,35680 | -0,67 | -1,59 | 0,00294 | NM_001393    | SCARNA12  |
| 7960728 | 0,41 | 1,33 | 0,45237 | 1,83  | 3,55  | 0,00374 | NR_003010    | C19orf54  |
| 8036956 | 0,41 | 1,33 | 0,33992 | 0,92  | 1,89  | 0,08858 | NM_198476    | MANBAL    |
| 8062371 | 0,41 | 1,33 | 0,28806 | 1,40  | 2,64  | 0,00319 | NM_022077    | AK1       |
| 8164293 | 0,41 | 1,33 | 0,37046 | 0,75  | 1,69  | 0,13110 | NM_000476    | MRPL53    |
| 8053165 | 0,41 | 1,33 | 0,33012 | 2,07  | 4,20  | 0,00554 | NM_053050    | PSTK      |
| 7931159 | 0,41 | 1,33 | 0,24874 | 0,61  | 1,53  | 0,13544 | NM_153336    | MAFG      |
| 8019796 | 0,41 | 1,33 | 0,26617 | 2,60  | 6,07  | 0,00172 | NM_002359    | GALNS     |
| 8003410 | 0,41 | 1,33 | 0,30131 | 1,08  | 2,11  | 0,14263 | NM_000512    | PXN       |
| 7967002 | 0,41 | 1,32 | 0,20419 | 1,42  | 2,67  | 0,01028 | NM_001080855 | ARID4B    |
| 7925201 | 0,41 | 1,32 | 0,16320 | 1,21  | 2,31  | 0,02217 | NM_016374    | MOSC2     |
| 7909866 | 0,41 | 1,32 | 0,19008 | 1,09  | 2,14  | 0,06577 | NM_017898    | MXI1      |
| 7930398 | 0,41 | 1,32 | 0,04955 | 0,62  | 1,54  | 0,06221 | NM_005962    | CA13      |
| 8147112 | 0,41 | 1,32 | 0,20373 | 1,86  | 3,62  | 0,01599 | NM_198584    | C4orf42   |
| 8093456 | 0,40 | 1,32 | 0,43132 | 2,21  | 4,62  | 0,00315 | NR_033339    | ---       |
| 7958375 | 0,40 | 1,32 | 0,12807 | 0,05  | 1,03  | 0,86889 | ---          | RBCK1     |
| 8060353 | 0,40 | 1,32 | 0,40609 | 3,35  | 10,18 | 0,01203 | NM_031229    | ANAPC16   |
| 7928300 | 0,40 | 1,32 | 0,08265 | 2,04  | 4,13  | 0,00138 | NM_173473    | WDSUB1    |
| 8056047 | 0,40 | 1,32 | 0,34890 | 0,69  | 1,62  | 0,00651 | NM_001128213 | OSTF1     |
| 8155883 | 0,40 | 1,32 | 0,49588 | 1,51  | 2,85  | 0,00014 | NM_012383    | ARHGFE2   |
| 7920877 | 0,40 | 1,32 | 0,42803 | 1,56  | 2,95  | 0,01361 | NM_001162383 | LIPT1     |
| 8043840 | 0,40 | 1,32 | 0,07325 | 0,01  | 1,01  | 0,89190 | NM_145197    | MCM3AP    |
| 8070988 | 0,40 | 1,32 | 0,13137 | 2,07  | 4,21  | 0,00308 | NM_003906    | SFT2D3    |
| 8045083 | 0,40 | 1,32 | 0,03477 | 0,89  | 1,86  | 0,00927 | NM_032740    | ZNF300    |
| 8115196 | 0,40 | 1,32 | 0,07592 | 1,02  | 2,02  | 0,05540 | NM_001172831 | MAP2K1    |
| 7984319 | 0,40 | 1,32 | 0,52012 | 2,26  | 4,79  | 0,00099 | NM_002755    | PPIL5     |
| 7974198 | 0,40 | 1,32 | 0,28348 | 2,07  | 4,19  | 0,00397 | NM_152329    | C14orf139 |
| 7981157 | 0,40 | 1,32 | 0,30156 | 0,29  | 1,22  | 0,37840 | NR_026779    | TUFT1     |
| 7905428 | 0,40 | 1,32 | 0,08588 | 3,19  | 9,11  | 0,00062 | NM_020127    | DSCC1     |
| 8152582 | 0,40 | 1,32 | 0,01327 | 2,04  | 4,11  | 0,00298 | NM_024094    | TWISTNB   |
| 8138454 | 0,40 | 1,32 | 0,19371 | 1,07  | 2,10  | 0,01897 | NM_001002926 | SHC4      |
| 7988563 | 0,40 | 1,32 | 0,22283 | -1,06 | -2,08 | 0,04769 | NM_203349    | LSS       |
| 8070961 | 0,40 | 1,32 | 0,28050 | 1,51  | 2,84  | 0,00556 | NM_002340    | DGCR8     |
| 8071314 | 0,40 | 1,32 | 0,07297 | 1,26  | 2,40  | 0,00008 | NM_022720    | HSD17B10  |
| 8172905 | 0,40 | 1,32 | 0,17611 | 0,45  | 1,37  | 0,06398 | NM_004493    | KSR1      |
| 8005785 | 0,40 | 1,32 | 0,02251 | 1,01  | 2,01  | 0,00398 | NM_014238    | POGK      |
| 7907024 | 0,40 | 1,32 | 0,23333 | 3,16  | 8,96  | 0,00072 | NM_017542    | SDK1      |
| 8131205 | 0,40 | 1,32 | 0,27001 | 0,88  | 1,85  | 0,01293 | NM_152744    | ---       |
| 8021150 | 0,40 | 1,32 | 0,02680 | -0,11 | -1,08 | 0,63239 | ---          | ZNF563    |
| 8034370 | 0,40 | 1,32 | 0,11020 | -0,11 | -1,08 | 0,49264 | NM_145276    | ADAM15    |
| 7905881 | 0,40 | 1,32 | 0,29984 | 1,84  | 3,59  | 0,01490 | NM_207196    | TOM1      |
| 8072659 | 0,40 | 1,32 | 0,53045 | 1,44  | 2,71  | 0,01460 | NR_024194    | FANCL     |
| 8052382 | 0,39 | 1,31 | 0,04701 | 1,94  | 3,83  | 0,00570 | NM_001114636 | NUDT6     |
| 8102713 | 0,39 | 1,31 | 0,34694 | 0,42  | 1,34  | 0,20739 | NM_007083    | FRMD4A    |
| 7932132 | 0,39 | 1,31 | 0,07378 | -0,24 | -1,18 | 0,01193 | NM_018027    | C2orf44   |
| 8050689 | 0,39 | 1,31 | 0,29073 | 2,46  | 5,51  | 0,00210 | NM_025203    | SUMF1     |
| 8085094 | 0,39 | 1,31 | 0,36881 | 0,66  | 1,58  | 0,05124 | NM_182760    | DNASE1L1  |
| 8176076 | 0,39 | 1,31 | 0,33593 | 1,98  | 3,94  | 0,00037 | NM_001009932 | OSBPL2    |
| 8063873 | 0,39 | 1,31 | 0,31319 | 0,82  | 1,77  | 0,04406 | NM_144498    | MGC72080  |
| 8138145 | 0,39 | 1,31 | 0,51569 | 0,54  | 1,45  | 0,33977 | NR_002822    | ZNF441    |
| 8025945 | 0,39 | 1,31 | 0,03989 | -1,10 | -2,14 | 0,01227 | NM_152355    | SPATA13   |
| 7968035 | 0,39 | 1,31 | 0,38404 | 0,94  | 1,92  | 0,00254 | NM_001166271 | RASSF4    |
| 7927186 | 0,39 | 1,31 | 0,28843 | 1,35  | 2,55  | 0,00041 | NM_032023    | AKR1C3    |
| 7925929 | 0,39 | 1,31 | 0,36457 | 0,01  | 1,01  | 0,99014 | NM_003739    | CSTF3     |
| 7947396 | 0,39 | 1,31 | 0,20849 | 1,27  | 2,41  | 0,00293 | NM_001326    | SEZ6L2    |
| 8000716 | 0,39 | 1,31 | 0,13978 | 1,14  | 2,20  | 0,10603 | NM_012410    | POP5      |
| 7967084 | 0,39 | 1,31 | 0,46104 | 0,89  | 1,86  | 0,02375 | NM_015918    | MIER2     |
| 8032009 | 0,39 | 1,31 | 0,33195 | 1,27  | 2,42  | 0,06637 | NM_017550    | DYRK4     |
| 7953229 | 0,39 | 1,31 | 0,05562 | 0,20  | 1,15  | 0,24268 | NM_003845    | SH3BP4    |
| 8049435 | 0,39 | 1,31 | 0,26383 | 1,62  | 3,08  | 0,00160 | NM_014521    | BAG5      |
| 7981439 | 0,39 | 1,31 | 0,41670 | 1,19  | 2,29  | 0,05513 | NM_001015049 | MPV17L2   |
| 8026982 | 0,39 | 1,31 | 0,31402 | 2,47  | 5,55  | 0,00098 | NM_032683    | ---       |



|         |      |      |         |       |       |         |              |            |  |
|---------|------|------|---------|-------|-------|---------|--------------|------------|--|
| 8110427 | 0,39 | 1,31 | 0,14964 | 0,59  | 1,51  | 0,18609 | ---          | C12orf66   |  |
| 7964677 | 0,39 | 1,31 | 0,20140 | 0,73  | 1,65  | 0,07821 | NM_152440    | NEK11      |  |
| 8082643 | 0,39 | 1,31 | 0,32848 | -0,13 | -1,10 | 0,43986 | NM_024800    | MBD5       |  |
| 8045604 | 0,39 | 1,31 | 0,14311 | 1,39  | 2,62  | 0,00276 | NM_018328    | RRP8       |  |
| 7946211 | 0,39 | 1,31 | 0,34972 | 0,33  | 1,25  | 0,15261 | NM_015324    | PMPCA      |  |
| 8159337 | 0,39 | 1,31 | 0,44249 | 2,56  | 5,89  | 0,00162 | NM_015160    | PORCN      |  |
| 8167287 | 0,39 | 1,31 | 0,44760 | 1,94  | 3,84  | 0,00719 | NM_022825    | PLCL2      |  |
| 8078187 | 0,39 | 1,31 | 0,20599 | -0,03 | -1,02 | 0,93627 | NM_015184    | ZNF679     |  |
| 8133042 | 0,39 | 1,31 | 0,43652 | -0,86 | -1,81 | 0,04552 | NM_153363    | PENK       |  |
| 8150901 | 0,39 | 1,31 | 0,37177 | -2,40 | -5,29 | 0,00229 | NM_006211    | USP2       |  |
| 7952249 | 0,39 | 1,31 | 0,33569 | 1,63  | 3,09  | 0,00280 | NM_004205    | MSRA       |  |
| 8144557 | 0,38 | 1,31 | 0,28577 | 0,22  | 1,16  | 0,12168 | NM_012331    | TSPYL2     |  |
| 8167763 | 0,38 | 1,31 | 0,16086 | -0,21 | -1,16 | 0,49458 | NM_022117    | PANK2      |  |
| 8060722 | 0,38 | 1,31 | 0,64912 | 0,89  | 1,86  | 0,08650 | NM_153638    | ZNF566     |  |
| 8036318 | 0,38 | 1,30 | 0,47509 | 1,19  | 2,28  | 0,12976 | NM_001145345 | KLHL12     |  |
| 7923489 | 0,38 | 1,30 | 0,12168 | 2,11  | 4,33  | 0,05228 | NM_021633    | ZNF740     |  |
| 7955721 | 0,38 | 1,30 | 0,19337 | 2,04  | 4,11  | 0,00077 | NM_001004304 | BATF2      |  |
| 7949340 | 0,38 | 1,30 | 0,24052 | 0,13  | 1,10  | 0,31680 | NM_138456    | C1QBP      |  |
| 8011850 | 0,38 | 1,30 | 0,53648 | 1,26  | 2,40  | 0,03937 | NM_001212    | OR7A17     |  |
| 8034901 | 0,38 | 1,30 | 0,03922 | -0,87 | -1,83 | 0,00412 | NM_030901    | PXMP4      |  |
| 8065719 | 0,38 | 1,30 | 0,50537 | -1,98 | -3,94 | 0,00205 | NM_007238    | TCEA3      |  |
| 7913593 | 0,38 | 1,30 | 0,18565 | 0,44  | 1,35  | 0,02861 | NM_003196    | NALCN      |  |
| 7972601 | 0,38 | 1,30 | 0,36282 | 1,21  | 2,31  | 0,00058 | NM_052867    | CHL1       |  |
| 8077270 | 0,38 | 1,30 | 0,37225 | -0,79 | -1,72 | 0,09616 | NM_006614    | SNCAIP     |  |
| 8107594 | 0,38 | 1,30 | 0,57805 | -1,59 | -3,00 | 0,00089 | NM_005460    | ---        |  |
| 8134429 | 0,38 | 1,30 | 0,41898 | -0,53 | -1,44 | 0,49334 | ---          | STARD13    |  |
| 7970924 | 0,38 | 1,30 | 0,12992 | 0,09  | 1,07  | 0,74007 | NM_178006    | C11orf67   |  |
| 7942783 | 0,38 | 1,30 | 0,00133 | 0,39  | 1,31  | 0,13407 | BC002752     | HIST1H2BC  |  |
| 8124406 | 0,38 | 1,30 | 0,27517 | 0,96  | 1,94  | 0,15156 | NM_003526    | SLC27A6    |  |
| 8107798 | 0,38 | 1,30 | 0,43129 | -1,19 | -2,28 | 0,02628 | NM_001017372 | EHD3       |  |
| 8041225 | 0,38 | 1,30 | 0,54291 | 0,74  | 1,67  | 0,04958 | NM_014600    | CPOX       |  |
| 8089072 | 0,38 | 1,30 | 0,01021 | 0,46  | 1,37  | 0,02356 | NM_000097    | THSD4      |  |
| 7984588 | 0,38 | 1,30 | 0,23757 | 2,02  | 4,05  | 0,00311 | NM_024817    | KLF6       |  |
| 7931810 | 0,38 | 1,30 | 0,33628 | 0,34  | 1,26  | 0,13907 | NM_001300    | POPDC2     |  |
| 8089785 | 0,38 | 1,30 | 0,40163 | 0,00  | 1,00  | 0,98659 | NM_022135    | TULP4      |  |
| 8123044 | 0,38 | 1,30 | 0,11735 | 2,24  | 4,74  | 0,00078 | NM_020245    | PRPF39     |  |
| 7974146 | 0,38 | 1,30 | 0,02154 | 1,25  | 2,38  | 0,00062 | NM_017922    | BICD1      |  |
| 7954717 | 0,38 | 1,30 | 0,13745 | 0,66  | 1,58  | 0,46317 | NM_001714    | PHF23      |  |
| 8012099 | 0,38 | 1,30 | 0,34831 | 0,81  | 1,76  | 0,15342 | NM_024297    | GPS1       |  |
| 8010747 | 0,38 | 1,30 | 0,64740 | 1,36  | 2,56  | 0,03173 | NM_212492    | TRAF3IP1   |  |
| 8049635 | 0,38 | 1,30 | 0,09879 | 0,69  | 1,61  | 0,01637 | NM_015650    | POLE4      |  |
| 8042953 | 0,38 | 1,30 | 0,44090 | 2,22  | 4,64  | 0,00099 | NM_019896    | TATDN2     |  |
| 8077804 | 0,37 | 1,30 | 0,42921 | 2,16  | 4,48  | 0,00431 | NM_014760    | ZNF37B     |  |
| 7933129 | 0,37 | 1,30 | 0,22424 | 0,51  | 1,42  | 0,03917 | NR_026777    | TSPAN14    |  |
| 7928705 | 0,37 | 1,30 | 0,34728 | 1,94  | 3,83  | 0,01652 | NM_030927    | SF3A2      |  |
| 8024420 | 0,37 | 1,29 | 0,41139 | 1,18  | 2,27  | 0,18988 | NM_007165    | ZNF625     |  |
| 8034344 | 0,37 | 1,29 | 0,03919 | -0,79 | -1,73 | 0,14593 | NM_145233    | AURKB      |  |
| 8012403 | 0,37 | 1,29 | 0,27766 | 2,94  | 7,66  | 0,00007 | NM_004217    | MRPL2      |  |
| 8126512 | 0,37 | 1,29 | 0,26943 | 2,33  | 5,03  | 0,01215 | NM_015950    | SLC35A2    |  |
| 8172460 | 0,37 | 1,29 | 0,02165 | 0,85  | 1,80  | 0,08617 | NM_001042498 | HSPB6      |  |
| 8036151 | 0,37 | 1,29 | 0,02696 | -0,81 | -1,76 | 0,01675 | NM_144617    | FAM134A    |  |
| 8048468 | 0,37 | 1,29 | 0,47182 | 1,80  | 3,49  | 0,00442 | NM_024293    | ZNF257     |  |
| 8027323 | 0,37 | 1,29 | 0,14523 | -0,32 | -1,25 | 0,55362 | NM_033468    | STEAP3     |  |
| 8044793 | 0,37 | 1,29 | 0,31570 | 0,29  | 1,22  | 0,09710 | NM_182915    | ANKRD36BP1 |  |
| 7922121 | 0,37 | 1,29 | 0,39012 | -0,60 | -1,51 | 0,13261 | NR_026844    | SP140L     |  |
| 8048926 | 0,37 | 1,29 | 0,45695 | 1,48  | 2,79  | 0,01975 | NM_138402    | SLC25A22   |  |
| 7945539 | 0,37 | 1,29 | 0,41066 | 0,14  | 1,10  | 0,78670 | NM_024698    | PML        |  |
| 7984779 | 0,37 | 1,29 | 0,21612 | 0,71  | 1,63  | 0,18169 | NM_033240    | SPINK1     |  |
| 8114964 | 0,37 | 1,29 | 0,18411 | 0,10  | 1,07  | 0,81719 | NM_003122    | LATS2      |  |
| 7970498 | 0,37 | 1,29 | 0,03667 | 0,64  | 1,56  | 0,03791 | NM_014572    | ATXN2L     |  |
| 7994386 | 0,37 | 1,29 | 0,44423 | 2,01  | 4,03  | 0,00224 | NM_007245    | ZMYM1      |  |
| 7899943 | 0,37 | 1,29 | 0,54983 | 1,79  | 3,47  | 0,00621 | NM_024772    | PPIAL4G    |  |
| 7919157 | 0,37 | 1,29 | 0,68923 | -1,63 | -3,09 | 0,00291 | NM_001123068 | DENND5B    |  |
| 7962151 | 0,37 | 1,29 | 0,10195 | 2,13  | 4,37  | 0,00046 | NM_144973    | PPPDE2     |  |
| 8076365 | 0,37 | 1,29 | 0,64468 | 2,23  | 4,69  | 0,00617 | NM_015704    | AP2A2      |  |
| 7937533 | 0,37 | 1,29 | 0,11692 | 1,18  | 2,27  | 0,00552 | NM_012305    | ---        |  |
| 7924819 | 0,37 | 1,29 | 0,19192 | -0,11 | -1,08 | 0,53859 | ---          | LOC728024  |  |
| 8150217 | 0,37 | 1,29 | 0,13653 | 0,10  | 1,07  | 0,72039 | NR_003671    | LRRC6      |  |
| 8152962 | 0,37 | 1,29 | 0,28630 | 0,67  | 1,59  | 0,20085 | NM_012472    | SF4        |  |
| 8035666 | 0,37 | 1,29 | 0,15595 | -0,39 | -1,31 | 0,03916 | NM_172231    | B4GALT6    |  |
| 8022747 | 0,37 | 1,29 | 0,57392 | 3,94  | 15,37 | 0,00019 | NM_004775    | ICAM1      |  |
| 8025601 | 0,37 | 1,29 | 0,45410 | 2,36  | 5,15  | 0,05716 | NM_000201    | ICA1L      |  |
| 8058350 | 0,37 | 1,29 | 0,26439 | -0,04 | -1,03 | 0,85863 | NM_138468    | PRDX2      |  |

|                               |      |      |         |       |        |         |                                     |              |
|-------------------------------|------|------|---------|-------|--------|---------|-------------------------------------|--------------|
| 8034544                       | 0,37 | 1,29 | 0,35402 | 1,02  | 2,03   | 0,01595 | NM_005809                           | PEX5         |
| 7953651                       | 0,37 | 1,29 | 0,44044 | 1,76  | 3,39   | 0,00023 | NM_001131023                        | ZDHHC1       |
| 8002029                       | 0,36 | 1,29 | 0,31592 | 1,19  | 2,28   | 0,01045 | NM_013304                           | DDX31        |
| 8164742                       | 0,36 | 1,29 | 0,38382 | 0,13  | 1,09   | 0,54923 | NM_022779                           | ---          |
| 8166094                       | 0,36 | 1,29 | 0,03755 | -0,15 | -1,11  | 0,35009 | ---                                 | NEK4         |
| 8088001                       | 0,36 | 1,29 | 0,37654 | 1,19  | 2,29   | 0,00224 | NM_003157                           | RICH2        |
| 8005064                       | 0,36 | 1,29 | 0,18947 | 1,19  | 2,27   | 0,00972 | NM_014859                           | FAM86D       |
| 8088895                       | 0,36 | 1,29 | 0,11636 | 0,21  | 1,16   | 0,08442 | NR_024241                           | ---          |
| 8052413                       | 0,36 | 1,29 | 0,30212 | 0,44  | 1,35   | 0,10066 | ---                                 | C2orf76      |
| 8054837                       | 0,36 | 1,29 | 0,04312 | 0,35  | 1,27   | 0,05154 | BC126397                            | FARSA        |
| 8034589                       | 0,36 | 1,29 | 0,27021 | 1,53  | 2,88   | 0,00767 | NM_004461                           | GLIS2        |
| 7992956                       | 0,36 | 1,29 | 0,01055 | 0,80  | 1,74   | 0,03997 | NM_032575                           | DOLK         |
| 8164515                       | 0,36 | 1,29 | 0,02414 | 1,33  | 2,51   | 0,09970 | NM_014908                           | ZNF623       |
| 8148658                       | 0,36 | 1,29 | 0,52123 | 2,19  | 4,56   | 0,00098 | NM_014789                           | C17orf58     |
| 8017831                       | 0,36 | 1,29 | 0,23447 | 0,50  | 1,42   | 0,08288 | NM_181656                           | FAM108C1     |
| 7985310                       | 0,36 | 1,29 | 0,08693 | 0,44  | 1,36   | 0,17034 | NM_021214                           | CDX4         |
| 8168395                       | 0,36 | 1,29 | 0,18515 | -1,34 | -2,53  | 0,08687 | NM_005193                           | RNASEK       |
| 8004241                       | 0,36 | 1,29 | 0,11712 | 0,94  | 1,92   | 0,01228 | NM_001004333                        | PCBP4        |
| 8087806                       | 0,36 | 1,29 | 0,49839 | 0,40  | 1,32   | 0,33672 | NM_033010                           | OSR1         |
| 8050497                       | 0,36 | 1,28 | 0,44950 | -0,62 | -1,54  | 0,17298 | NM_145260                           | DLG5         |
| 7934615                       | 0,36 | 1,28 | 0,22737 | 1,77  | 3,41   | 0,00752 | NM_004747                           | ---          |
| 7957606                       | 0,36 | 1,28 | 0,50800 | -0,16 | -1,12  | 0,34795 | ---                                 | TRIM21       |
| 7945962                       | 0,36 | 1,28 | 0,52384 | 0,72  | 1,65   | 0,00354 | NM_003141                           | PABPC3       |
| 7968128                       | 0,36 | 1,28 | 0,23383 | 0,04  | 1,03   | 0,93773 | NM_030979                           | CD58         |
| 7918902                       | 0,36 | 1,28 | 0,29381 | 2,51  | 5,68   | 0,00453 | NM_001779                           | FKBP5        |
| 8125919                       | 0,36 | 1,28 | 0,34623 | 1,65  | 3,14   | 0,00688 | NM_001145775                        | ---          |
| 8146334                       | 0,36 | 1,28 | 0,25061 | 0,13  | 1,10   | 0,61830 | ---                                 | MAGED4       |
| 8167673                       | 0,36 | 1,28 | 0,18616 | 0,72  | 1,65   | 0,13416 | NM_001098800                        | MAGED4       |
| 8172722                       | 0,36 | 1,28 | 0,18616 | 0,72  | 1,65   | 0,13416 | NM_001098800                        | DGKL         |
| 8049317                       | 0,36 | 1,28 | 0,60628 | 2,67  | 6,36   | 0,00115 | NM_152879                           | EML6         |
| 8042040                       | 0,36 | 1,28 | 0,35615 | -0,41 | -1,33  | 0,21339 | NM_001039753                        | ---          |
| 8150034                       | 0,36 | 1,28 | 0,70842 | -2,04 | -4,10  | 0,01443 | ---                                 | ACY1         |
| 8080168                       | 0,36 | 1,28 | 0,06929 | 1,37  | 2,58   | 0,02222 | NM_000666                           | IKBKE        |
| 7909188                       | 0,36 | 1,28 | 0,31890 | -0,09 | -1,06  | 0,79655 | NM_014002                           | CDK2         |
| 7956076                       | 0,36 | 1,28 | 0,44083 | 2,83  | 7,09   | 0,00038 | NM_001798                           | VPS4A        |
| 7996919                       | 0,36 | 1,28 | 0,46046 | 1,35  | 2,55   | 0,05218 | NM_013245                           | COP58        |
| 8049478                       | 0,36 | 1,28 | 0,63205 | 0,70  | 1,63   | 0,13084 | NM_198189                           | YOD1         |
| 7909283                       | 0,36 | 1,28 | 0,47106 | -0,74 | -1,67  | 0,16172 | NM_018566                           | LTBP3        |
| 7949412                       | 0,36 | 1,28 | 0,23158 | 0,96  | 1,94   | 0,24494 | NM_001130144                        | SIGMAR1      |
| 8160857                       | 0,36 | 1,28 | 0,27088 | 2,22  | 4,64   | 0,02312 | NM_005866                           | ZDHHC20      |
| 7970524                       | 0,36 | 1,28 | 0,06955 | 1,79  | 3,47   | 0,02794 | NM_153251                           | C1orf26      |
| 7908178                       | 0,36 | 1,28 | 0,30596 | 0,39  | 1,31   | 0,12006 | NM_017673                           | WBP11P1 //   |
| WBP11P1 // WBP11P1 // WBP11P1 |      |      |         |       |        |         |                                     |              |
| 8020842                       | 0,36 | 1,28 | 0,28080 | 0,20  | 1,15   | 0,61773 | NR_003558 // NR_003558 // NR_003558 |              |
| // NR_003558                  |      | TOX2 |         |       |        |         |                                     |              |
| 8062782                       | 0,36 | 1,28 | 0,34027 | 0,18  | 1,13   | 0,56165 | NM_032883                           | PSMD4        |
| 7905374                       | 0,36 | 1,28 | 0,50809 | 0,59  | 1,51   | 0,05733 | NM_002810                           | PDAP1        |
| 8141273                       | 0,36 | 1,28 | 0,32733 | -0,49 | -1,41  | 0,12398 | NM_014891                           | SLC30A1      |
| 7924092                       | 0,35 | 1,28 | 0,38934 | 0,00  | 1,00   | 0,99088 | NM_021194                           | ZNF131       |
| 8105136                       | 0,35 | 1,28 | 0,63062 | 4,15  | 17,74  | 0,00007 | NM_003432                           | NDUFB11      |
| 8172296                       | 0,35 | 1,28 | 0,30889 | 1,32  | 2,50   | 0,07201 | NR_024234                           | RPL17        |
| 8023252                       | 0,35 | 1,28 | 0,31809 | 0,97  | 1,95   | 0,02055 | NM_000985                           | TPD52L2      |
| 8064191                       | 0,35 | 1,28 | 0,47629 | 2,15  | 4,44   | 0,00143 | NM_199360                           | TADA1        |
| 7922008                       | 0,35 | 1,28 | 0,13759 | 0,39  | 1,31   | 0,13573 | NM_053053                           | FXR2         |
| 8012226                       | 0,35 | 1,28 | 0,35844 | 1,12  | 2,18   | 0,00035 | NM_004860                           | ATP5G3       |
| 8056930                       | 0,35 | 1,28 | 0,20076 | 0,37  | 1,29   | 0,16681 | NM_001689                           | GART         |
| 8070102                       | 0,35 | 1,28 | 0,40019 | 2,95  | 7,71   | 0,00029 | NM_000819                           | LOC100133106 |
| 8115732                       | 0,35 | 1,28 | 0,48545 | -0,36 | -1,28  | 0,06102 | AY358216                            | ---          |
| 8140707                       | 0,35 | 1,28 | 0,38089 | -0,28 | -1,22  | 0,62405 | ---                                 | EIF4ENIF1    |
| 8075507                       | 0,35 | 1,28 | 0,21494 | 0,09  | 1,06   | 0,87592 | NM_019843                           | NHEDC1       |
| 8177130                       | 0,35 | 1,28 | 0,48733 | -0,27 | -1,21  | 0,57590 | NM_139173                           | HDGF         |
| 7921133                       | 0,35 | 1,28 | 0,10068 | 2,62  | 6,16   | 0,00101 | NM_004494                           | TENC1        |
| 7955663                       | 0,35 | 1,28 | 0,48485 | 0,48  | 1,39   | 0,15440 | NM_170754                           | FAM118A      |
| 8073752                       | 0,35 | 1,28 | 0,27626 | 1,34  | 2,54   | 0,03744 | NM_001104595                        | CMAH         |
| 8124307                       | 0,35 | 1,28 | 0,50305 | -1,03 | -2,05  | 0,02101 | NR_002174                           | IGHD         |
| 7981724                       | 0,35 | 1,28 | 0,76680 | -4,17 | -17,95 | 0,00127 | BC021276                            | HABP4        |
| 8156610                       | 0,35 | 1,28 | 0,40186 | 1,41  | 2,66   | 0,00017 | NM_014282                           | DNAJC28      |
| 8070097                       | 0,35 | 1,28 | 0,13549 | 1,04  | 2,05   | 0,12741 | NM_017833                           | PI4KAP2      |
| 8074748                       | 0,35 | 1,28 | 0,00054 | 3,52  | 11,48  | 0,00022 | NR_003700                           | FNTA         |
| 8146268                       | 0,35 | 1,28 | 0,43886 | 1,56  | 2,94   | 0,02257 | NM_002027                           | ---          |
| 7979862                       | 0,35 | 1,28 | 0,66942 | -1,58 | -2,99  | 0,08155 | ---                                 | CHMP4B       |
| 8061958                       | 0,35 | 1,28 | 0,05126 | 1,14  | 2,20   | 0,02917 | NM_176812                           | EVI2B        |
| 8014063                       | 0,35 | 1,28 | 0,35750 | 1,73  | 3,32   | 0,02873 | NM_006495                           | LIAS         |

|         |      |      |         |       |       |         |                  |           |
|---------|------|------|---------|-------|-------|---------|------------------|-----------|
| 8094688 | 0,35 | 1,28 | 0,27749 | 1,72  | 3,29  | 0,03015 | NM_006859        | PSG6      |
| 8037246 | 0,35 | 1,28 | 0,46573 | -1,11 | -2,16 | 0,00457 | NM_001031850     | TMUB2     |
| 8007594 | 0,35 | 1,28 | 0,43946 | 2,07  | 4,18  | 0,00034 | NM_177441        | LOC442454 |
| 8173179 | 0,35 | 1,27 | 0,48230 | 0,10  | 1,07  | 0,51278 | NR_002308        | TAGLN2    |
| 7921487 | 0,35 | 1,27 | 0,28056 | 0,26  | 1,20  | 0,56195 | NM_003564        | SUPT3H    |
| 8126710 | 0,35 | 1,27 | 0,19769 | 1,33  | 2,52  | 0,00176 | NM_181356        | ZNF630    |
| 8172379 | 0,35 | 1,27 | 0,16363 | 0,76  | 1,70  | 0,14008 | NM_001037735     | CDK5RAP2  |
| 8163733 | 0,35 | 1,27 | 0,28701 | 1,56  | 2,94  | 0,00371 | NM_018249        | FOSL1     |
| 7949532 | 0,35 | 1,27 | 0,34256 | 1,09  | 2,13  | 0,08432 | NM_005438        | ---       |
| 8030391 | 0,35 | 1,27 | 0,73400 | -2,98 | -7,88 | 0,00003 | --- ATN1         | ---       |
| 7953547 | 0,35 | 1,27 | 0,23085 | 0,66  | 1,58  | 0,06269 | NM_001007026     | WFDC3     |
| 8066579 | 0,35 | 1,27 | 0,37003 | 0,31  | 1,24  | 0,27466 | NM_080614        | GRAMD1A   |
| 8027701 | 0,35 | 1,27 | 0,13411 | 2,09  | 4,25  | 0,00544 | NM_020895        | DIXDC1    |
| 7943803 | 0,35 | 1,27 | 0,40603 | 0,70  | 1,62  | 0,18310 | NM_001037954     | PPP2R5D   |
| 8119627 | 0,35 | 1,27 | 0,18946 | 1,58  | 2,99  | 0,00068 | NM_006245        | PTGFRN    |
| 7904293 | 0,35 | 1,27 | 0,42466 | 2,80  | 6,97  | 0,00301 | NM_020440        | FLJ16423  |
| 8175638 | 0,35 | 1,27 | 0,21329 | 0,92  | 1,89  | 0,01651 | ENST00000432041  | C10orf134 |
| 7930818 | 0,34 | 1,27 | 0,43303 | -0,27 | -1,21 | 0,48935 | ENST00000341276  | IGJ       |
| 8100827 | 0,34 | 1,27 | 0,60124 | -1,77 | -3,41 | 0,00009 | NM_144646        | SS18L1    |
| 8063839 | 0,34 | 1,27 | 0,06373 | 1,26  | 2,39  | 0,01381 | NM_198935        | TMSB15B   |
| 8169073 | 0,34 | 1,27 | 0,42163 | 0,13  | 1,09  | 0,78485 | NM_194324        | GATAD1    |
| 8134201 | 0,34 | 1,27 | 0,24780 | 0,48  | 1,39  | 0,14560 | NM_021167        | TEC       |
| 8100231 | 0,34 | 1,27 | 0,38774 | 1,43  | 2,69  | 0,05581 | NM_003215        | PS1TP4    |
| 8054769 | 0,34 | 1,27 | 0,25023 | 0,02  | 1,01  | 0,95609 | AY427952 SNORD68 | ---       |
| 7997940 | 0,34 | 1,27 | 0,26686 | -1,23 | -2,34 | 0,37791 | NR_002450        | EPB41L3   |
| 8022118 | 0,34 | 1,27 | 0,36935 | -1,35 | -2,56 | 0,00033 | NM_012307        | PTN       |
| 8143144 | 0,34 | 1,27 | 0,41087 | -1,39 | -2,62 | 0,00741 | NM_002825        | NCOR2     |
| 7967493 | 0,34 | 1,27 | 0,38305 | 1,47  | 2,77  | 0,00839 | NM_006312        | MOGS      |
| 8053158 | 0,34 | 1,27 | 0,25100 | 2,52  | 5,72  | 0,01515 | NM_006302        | ---       |
| 7992516 | 0,34 | 1,27 | 0,56176 | -0,62 | -1,53 | 0,28813 | --- TMEM18       | ---       |
| 8049998 | 0,34 | 1,27 | 0,49273 | 1,59  | 3,02  | 0,01103 | NM_152834        | NRSN2     |
| 8060339 | 0,34 | 1,27 | 0,19828 | 0,19  | 1,14  | 0,71965 | NM_024958        | MAMLD1    |
| 8170420 | 0,34 | 1,27 | 0,37578 | 0,80  | 1,74  | 0,00003 | NM_005491        | TMEM148   |
| 7997676 | 0,34 | 1,27 | 0,22793 | -1,33 | -2,51 | 0,01619 | BC030801 RFFL    | ---       |
| 8014189 | 0,34 | 1,27 | 0,48219 | 4,04  | 16,43 | 0,00120 | NM_057178        | CYTH3     |
| 8138067 | 0,34 | 1,27 | 0,39059 | 2,80  | 6,98  | 0,00001 | NM_004227        | NUAK1     |
| 7966026 | 0,34 | 1,26 | 0,43838 | 1,40  | 2,64  | 0,00017 | NM_014840        | KIN       |
| 7932000 | 0,34 | 1,26 | 0,26486 | 0,33  | 1,25  | 0,31746 | NM_012311        | SP4       |
| 8131709 | 0,34 | 1,26 | 0,50811 | 2,25  | 4,75  | 0,00273 | NM_003112        | KIF22     |
| 8003583 | 0,34 | 1,26 | 0,43267 | 2,04  | 4,11  | 0,00151 | NM_007317        | MKKS      |
| 8064967 | 0,34 | 1,26 | 0,43927 | 1,74  | 3,33  | 0,01645 | NM_018848        | RPS14P3   |
| 7898582 | 0,34 | 1,26 | 0,43496 | 1,35  | 2,56  | 0,03534 | BC072682         | GPR37     |
| 8142687 | 0,34 | 1,26 | 0,36549 | -0,96 | -1,94 | 0,00021 | NM_005302        | LPCAT1    |
| 8110841 | 0,34 | 1,26 | 0,30198 | 2,26  | 4,79  | 0,00608 | NM_024830        | ---       |
| 7995580 | 0,34 | 1,26 | 0,57951 | 0,24  | 1,18  | 0,48179 | --- COPG2        | ---       |
| 8142945 | 0,33 | 1,26 | 0,13735 | 0,79  | 1,73  | 0,01443 | NM_012133        | C15orf29  |
| 7987180 | 0,33 | 1,26 | 0,44851 | 1,15  | 2,22  | 0,01844 | NM_024713        | FCGR2C    |
| 7906767 | 0,33 | 1,26 | 0,71098 | -0,52 | -1,44 | 0,52470 | NM_201563        | PANK1     |
| 7934945 | 0,33 | 1,26 | 0,28803 | 0,96  | 1,95  | 0,02361 | NM_148977        | GJD3      |
| 8014969 | 0,33 | 1,26 | 0,38725 | -0,81 | -1,75 | 0,02455 | NM_152219        | LIF       |
| 8075310 | 0,33 | 1,26 | 0,09342 | 2,96  | 7,76  | 0,00037 | NM_002309        | CKAP4     |
| 7966035 | 0,33 | 1,26 | 0,34291 | 0,23  | 1,17  | 0,57499 | NM_006825        | ZNF780A   |
| 8036820 | 0,33 | 1,26 | 0,36800 | 1,14  | 2,20  | 0,00193 | NM_001142577     | NUP50     |
| 8073733 | 0,33 | 1,26 | 0,44945 | 1,84  | 3,58  | 0,00469 | NM_153645        | ZNF404    |
| 8037430 | 0,33 | 1,26 | 0,41863 | 1,83  | 3,56  | 0,00661 | NM_001033719     | ADCK1     |
| 7976000 | 0,33 | 1,26 | 0,50252 | 2,59  | 6,01  | 0,00494 | NM_020421        | MRPL40    |
| 8071206 | 0,33 | 1,26 | 0,27915 | 1,51  | 2,84  | 0,00318 | NM_003776        | SCARA3    |
| 8145555 | 0,33 | 1,26 | 0,49711 | -0,39 | -1,31 | 0,37237 | NM_016240        | RAB44     |
| 8119102 | 0,33 | 1,26 | 0,17983 | -1,27 | -2,41 | 0,01596 | ENST00000229824  | C2orf56   |
| 8041495 | 0,33 | 1,26 | 0,47478 | 1,71  | 3,27  | 0,00102 | NM_144736        | DNMT1     |
| 8033912 | 0,33 | 1,26 | 0,27825 | 1,64  | 3,11  | 0,03507 | NM_001130823     | FAM13A    |
| 8101728 | 0,33 | 1,26 | 0,14112 | 0,58  | 1,50  | 0,01036 | NM_014883        | ZNF420    |
| 8028219 | 0,33 | 1,26 | 0,40316 | 1,05  | 2,07  | 0,01273 | NM_144689        | LOC162632 |
| 8005225 | 0,33 | 1,26 | 0,50400 | 2,75  | 6,73  | 0,00407 | NR_003190        | NBPF10    |
| 7912808 | 0,33 | 1,26 | 0,75517 | 0,09  | 1,07  | 0,80438 | NM_001039703     | LRCC1     |
| 8147079 | 0,33 | 1,26 | 0,22298 | 2,66  | 6,34  | 0,00154 | NM_033402        | C14orf182 |
| 7978911 | 0,33 | 1,26 | 0,40846 | -0,69 | -1,61 | 0,32514 | NM_001012706     | CEP68     |
| 8042326 | 0,33 | 1,26 | 0,25843 | 0,09  | 1,07  | 0,75820 | NM_015147        | SLC8A1    |
| 8051762 | 0,33 | 1,26 | 0,36524 | -1,06 | -2,08 | 0,00062 | NM_021097        | RAD51L1   |
| 7975292 | 0,33 | 1,26 | 0,48582 | 1,58  | 2,98  | 0,02163 | NM_002877        | C5orf43   |
| 8112302 | 0,33 | 1,26 | 0,26177 | 1,61  | 3,05  | 0,00878 | NM_001048249     | ARHGDI1A  |
| 8019263 | 0,33 | 1,26 | 0,02572 | 0,99  | 1,98  | 0,09091 | NM_004309        | MTX1      |
| 7905968 | 0,33 | 1,26 | 0,51648 | -0,16 | -1,12 | 0,77926 | NM_002455        | KCND1     |

|         |      |      |         |       |       |         |                 |              |
|---------|------|------|---------|-------|-------|---------|-----------------|--------------|
| 8172493 | 0,33 | 1,26 | 0,10894 | 0,03  | 1,02  | 0,75347 | NM_004979       | TINAGL1      |
| 7899627 | 0,33 | 1,26 | 0,13507 | 1,87  | 3,65  | 0,00756 | NM_022164       | SEC16A       |
| 8165183 | 0,33 | 1,26 | 0,32622 | 2,23  | 4,69  | 0,00252 | NM_014866       | KIAA1310     |
| 8053949 | 0,33 | 1,26 | 0,45753 | 1,55  | 2,94  | 0,02616 | NM_017991       | APH1A        |
| 7919729 | 0,33 | 1,26 | 0,17009 | 1,56  | 2,95  | 0,04488 | NM_016022       | SYNE1        |
| 8130211 | 0,33 | 1,26 | 0,18340 | -0,04 | -1,03 | 0,54475 | NM_182961       | MECR         |
| 7914245 | 0,33 | 1,26 | 0,37690 | 0,95  | 1,93  | 0,03227 | NM_001024732    | NECAB3       |
| 8065693 | 0,33 | 1,25 | 0,28114 | 0,85  | 1,80  | 0,12927 | NM_031232       | KIAA0895     |
| 8139021 | 0,33 | 1,25 | 0,45825 | 2,52  | 5,73  | 0,00049 | NM_001100425    | C12orf51     |
| 7966517 | 0,33 | 1,25 | 0,30289 | 2,59  | 6,03  | 0,00009 | NM_001109662    | GRK5         |
| 7930894 | 0,33 | 1,25 | 0,47537 | 0,17  | 1,12  | 0,56866 | NM_005308       | NDC80        |
| 8019857 | 0,33 | 1,25 | 0,05955 | 2,58  | 5,99  | 0,00512 | NM_006101       | DMGDH        |
| 8112822 | 0,33 | 1,25 | 0,10786 | 1,21  | 2,31  | 0,01545 | NM_013391       | ---          |
| 7920333 | 0,33 | 1,25 | 0,52613 | -1,21 | -2,31 | 0,04659 | ---             | SNORD32A     |
| 8030360 | 0,33 | 1,25 | 0,25089 | 1,56  | 2,95  | 0,10006 | NR_000021       | C21orf91     |
| 8069574 | 0,33 | 1,25 | 0,46134 | -0,27 | -1,21 | 0,23512 | NM_001100420    | ---          |
| 8090801 | 0,33 | 1,25 | 0,37213 | -0,75 | -1,68 | 0,04357 | ---             | IVD          |
| 7982723 | 0,33 | 1,25 | 0,62653 | 2,18  | 4,55  | 0,00083 | NM_002225       | CTSH         |
| 7990757 | 0,33 | 1,25 | 0,39531 | 1,32  | 2,50  | 0,01045 | NM_004390       | CUEDC2       |
| 7936011 | 0,33 | 1,25 | 0,58277 | 0,80  | 1,74  | 0,18514 | NM_024040       | CDKN3        |
| 7974404 | 0,32 | 1,25 | 0,46027 | 3,26  | 9,59  | 0,00039 | NM_005192       | C1D          |
| 7934731 | 0,32 | 1,25 | 0,31963 | 1,39  | 2,62  | 0,02829 | NM_006333       | LOC100132346 |
| 8002760 | 0,32 | 1,25 | 0,33524 | -0,83 | -1,77 | 0,06916 | ENST00000412576 | LOC100132147 |
| 7912802 | 0,32 | 1,25 | 0,73698 | -0,31 | -1,24 | 0,70983 | BC036435 IPO4   |              |
| 7978132 | 0,32 | 1,25 | 0,38694 | 2,15  | 4,45  | 0,00341 | NM_024658       | OPN3         |
| 7925492 | 0,32 | 1,25 | 0,40462 | 3,31  | 9,89  | 0,00006 | NM_014322       | CXorf23      |
| 8171708 | 0,32 | 1,25 | 0,40841 | -0,03 | -1,02 | 0,88473 | NM_198279       | KDM5D        |
| 8177232 | 0,32 | 1,25 | 0,36799 | 1,24  | 2,36  | 0,02080 | NM_001146705    | AGPAT4       |
| 8130628 | 0,32 | 1,25 | 0,12625 | 0,54  | 1,45  | 0,06268 | NM_020133       | RRP7B        |
| 8076449 | 0,32 | 1,25 | 0,73543 | -0,51 | -1,42 | 0,37992 | NR_002184       | TARSL2       |
| 7991640 | 0,32 | 1,25 | 0,31065 | 1,03  | 2,05  | 0,02596 | NM_152334       | P4HA2        |
| 8114002 | 0,32 | 1,25 | 0,66697 | -0,27 | -1,21 | 0,53702 | ENST00000416053 | DSG2         |
| 8020779 | 0,32 | 1,25 | 0,27093 | 4,19  | 18,29 | 0,00094 | NM_001943       | LSG1         |
| 8092905 | 0,32 | 1,25 | 0,55718 | 3,08  | 8,47  | 0,00143 | NM_018385       | BMP4         |
| 7979241 | 0,32 | 1,25 | 0,51839 | 0,35  | 1,27  | 0,54196 | NM_001202       | FAM24B       |
| 7936809 | 0,32 | 1,25 | 0,42317 | 2,35  | 5,09  | 0,00033 | NM_152644       | NDUFA13      |
| 8027205 | 0,32 | 1,25 | 0,39056 | -0,80 | -1,74 | 0,17692 | NM_015965       | C6orf138     |
| 8126855 | 0,32 | 1,25 | 0,20699 | -1,49 | -2,81 | 0,01695 | NM_001013732    | HARS2        |
| 8108603 | 0,32 | 1,25 | 0,07186 | 0,55  | 1,46  | 0,14328 | NM_012208       | PRDM10       |
| 7952707 | 0,32 | 1,25 | 0,21119 | 0,85  | 1,80  | 0,02596 | NM_020228       | SNORA7B      |
| 8090565 | 0,32 | 1,25 | 0,44898 | -0,09 | -1,07 | 0,40924 | NR_002992       | BUD13        |
| 7951826 | 0,32 | 1,25 | 0,18319 | 0,58  | 1,50  | 0,06145 | NM_032725       | SDF4         |
| 7911422 | 0,32 | 1,25 | 0,30995 | 0,22  | 1,16  | 0,54920 | NM_016547       | SSPN         |
| 7954481 | 0,32 | 1,25 | 0,18833 | -0,41 | -1,33 | 0,07736 | NM_005086       | PURB         |
| 8139430 | 0,32 | 1,25 | 0,39202 | 1,02  | 2,03  | 0,00934 | NM_033224       | C4orf43      |
| 8098150 | 0,32 | 1,25 | 0,22915 | 0,15  | 1,11  | 0,48795 | NM_018352       | ---          |
| 8165653 | 0,32 | 1,24 | 0,35054 | -0,87 | -1,82 | 0,00278 | ---             | NEURL4       |
| 8012166 | 0,32 | 1,24 | 0,42200 | 0,82  | 1,76  | 0,06611 | NM_032442       | COQ9         |
| 7996041 | 0,32 | 1,24 | 0,43142 | 2,58  | 5,96  | 0,00199 | NM_020312       | GNA12        |
| 8137865 | 0,32 | 1,24 | 0,59663 | 3,23  | 9,39  | 0,00638 | NM_007353       | CENPC1       |
| 8100603 | 0,32 | 1,24 | 0,53474 | 0,36  | 1,29  | 0,34358 | NM_001812       | FN1          |
| 8048139 | 0,31 | 1,24 | 0,28550 | -1,14 | -2,20 | 0,00582 | NM_212482       | MSH2         |
| 8041867 | 0,31 | 1,24 | 0,28182 | 2,41  | 5,31  | 0,00131 | NM_000251       | ---          |
| 8156846 | 0,31 | 1,24 | 0,41918 | -0,60 | -1,51 | 0,39936 | ---             | TRAPPC9      |
| 8153175 | 0,31 | 1,24 | 0,63147 | 2,93  | 7,64  | 0,00021 | NM_031466       | TARBP1       |
| 7925130 | 0,31 | 1,24 | 0,46847 | 2,21  | 4,62  | 0,00581 | NM_005646       | IFT88        |
| 7967933 | 0,31 | 1,24 | 0,40382 | -0,18 | -1,13 | 0,39609 | NM_175605       | FAM177A1     |
| 7973918 | 0,31 | 1,24 | 0,37413 | 2,55  | 5,86  | 0,00725 | NM_173607       | WHSC1        |
| 8093539 | 0,31 | 1,24 | 0,28229 | 1,53  | 2,88  | 0,00461 | NM_133330       | ACER2        |
| 8154563 | 0,31 | 1,24 | 0,68579 | 0,84  | 1,78  | 0,05031 | NM_001010887    | NRIP3        |
| 7946446 | 0,31 | 1,24 | 0,42323 | -0,04 | -1,02 | 0,93078 | NM_020645       | TSHZ1        |
| 8021768 | 0,31 | 1,24 | 0,59078 | 0,13  | 1,10  | 0,40637 | NM_005786       | DPP3         |
| 7941621 | 0,31 | 1,24 | 0,41775 | 2,65  | 6,26  | 0,00683 | NM_005700       | SFRS4        |
| 7914235 | 0,31 | 1,24 | 0,53487 | 0,98  | 1,97  | 0,05150 | NM_005626       | ZNF321       |
| 8039013 | 0,31 | 1,24 | 0,00787 | -0,27 | -1,20 | 0,43798 | NM_203307       | ADAMTSL3     |
| 7985522 | 0,31 | 1,24 | 0,34931 | 0,23  | 1,17  | 0,47255 | NM_207517       | EEF2K        |
| 7993946 | 0,31 | 1,24 | 0,34376 | 0,50  | 1,41  | 0,19208 | NM_013302       | ZNF223       |
| 8029360 | 0,31 | 1,24 | 0,17058 | 0,93  | 1,91  | 0,14859 | NM_013361       | TAF9         |
| 8177635 | 0,31 | 1,24 | 0,20928 | 0,82  | 1,76  | 0,02400 | NM_003187       | FAM171A1     |
| 7932243 | 0,31 | 1,24 | 0,46942 | 1,89  | 3,70  | 0,02410 | NM_001010924    | CDYL         |
| 8116710 | 0,31 | 1,24 | 0,51010 | 1,13  | 2,18  | 0,00389 | NR_026590       | PARD3B       |
| 8047709 | 0,31 | 1,24 | 0,43668 | -0,10 | -1,07 | 0,84090 | NM_152526       | GOLGA1       |
| 8164105 | 0,31 | 1,24 | 0,29181 | 1,35  | 2,56  | 0,03475 | NM_002077       | EXOG         |

|         |      |      |         |       |       |         |              |           |
|---------|------|------|---------|-------|-------|---------|--------------|-----------|
| 8078818 | 0,31 | 1,24 | 0,21404 | 0,20  | 1,15  | 0,39845 | NM_005107    | STIM1     |
| 7937900 | 0,31 | 1,24 | 0,64857 | 2,98  | 7,88  | 0,00383 | NM_003156    | PHKA1     |
| 8173551 | 0,31 | 1,24 | 0,45611 | 2,90  | 7,44  | 0,00022 | NM_002637    | ANKRD20B  |
| 8067864 | 0,31 | 1,24 | 0,65782 | 0,61  | 1,53  | 0,58290 | NR_003366    | SH2B3     |
| 7958749 | 0,31 | 1,24 | 0,39182 | 0,61  | 1,53  | 0,06983 | NM_005475    | LCA5L     |
| 8070398 | 0,31 | 1,24 | 0,29176 | -0,34 | -1,27 | 0,29496 | NM_152505    | ZNF264    |
| 8031690 | 0,31 | 1,24 | 0,56632 | 0,82  | 1,77  | 0,10662 | NM_003417    | SMARCD3   |
| 8143919 | 0,30 | 1,24 | 0,09911 | -0,41 | -1,33 | 0,13930 | NM_001003802 | GPR124    |
| 8145865 | 0,30 | 1,24 | 0,48963 | -0,05 | -1,04 | 0,93495 | NM_032777    | SUPT5H    |
| 8028674 | 0,30 | 1,24 | 0,42689 | 1,57  | 2,98  | 0,01129 | NM_003169    | LYPD6     |
| 8045674 | 0,30 | 1,23 | 0,13556 | 0,97  | 1,96  | 0,06676 | NM_194317    | RRP15     |
| 7909782 | 0,30 | 1,23 | 0,46369 | -0,05 | -1,03 | 0,86107 | NM_016052    | HLA-DMA   |
| 8178884 | 0,30 | 1,23 | 0,35918 | 3,34  | 10,10 | 0,00424 | NM_006120    | HLA-DMA   |
| 8180086 | 0,30 | 1,23 | 0,35918 | 3,34  | 10,10 | 0,00424 | NM_006120    | ANKRA2    |
| 8112596 | 0,30 | 1,23 | 0,42565 | 1,35  | 2,55  | 0,01362 | NM_023039    | APEH      |
| 8079772 | 0,30 | 1,23 | 0,59508 | 1,74  | 3,34  | 0,00236 | NM_001640    | TBC1D22A  |
| 8073909 | 0,30 | 1,23 | 0,30939 | 1,74  | 3,34  | 0,01630 | NM_014346    | ASTN1     |
| 7922525 | 0,30 | 1,23 | 0,16337 | -0,98 | -1,98 | 0,04096 | NM_004319    | FAM76B    |
| 7951093 | 0,30 | 1,23 | 0,43118 | 0,66  | 1,58  | 0,10889 | NM_144664    | RGP1      |
| 8155110 | 0,30 | 1,23 | 0,16952 | 1,38  | 2,61  | 0,00620 | NM_001080496 | ABCA13    |
| 8132743 | 0,30 | 1,23 | 0,11092 | -0,28 | -1,21 | 0,00293 | NM_152701    | ZNF181    |
| 8027685 | 0,30 | 1,23 | 0,27953 | 0,23  | 1,18  | 0,32231 | NM_001029997 | LALBA     |
| 7962804 | 0,30 | 1,23 | 0,42768 | -0,10 | -1,07 | 0,46053 | NM_002289    | ---       |
| 8078542 | 0,30 | 1,23 | 0,22606 | 0,14  | 1,10  | 0,47154 | ---          | ---       |
| 7979886 | 0,30 | 1,23 | 0,62759 | 1,28  | 2,42  | 0,19812 | ---          | C7orf41   |
| 8132055 | 0,30 | 1,23 | 0,61012 | 0,39  | 1,31  | 0,06007 | NM_152793    | PIGG      |
| 8093343 | 0,30 | 1,23 | 0,28405 | 0,75  | 1,68  | 0,00092 | NM_001127178 | SCN8A     |
| 7955502 | 0,30 | 1,23 | 0,28287 | 0,39  | 1,31  | 0,02114 | NM_014191    | ZFP90     |
| 7996807 | 0,30 | 1,23 | 0,15491 | 0,98  | 1,98  | 0,01228 | NM_133458    | ZFAT      |
| 8153043 | 0,30 | 1,23 | 0,42620 | 1,31  | 2,49  | 0,02295 | NM_001029939 | RNF167    |
| 8004030 | 0,30 | 1,23 | 0,04429 | 2,33  | 5,04  | 0,00184 | NM_015528    | ZNF609    |
| 7984203 | 0,30 | 1,23 | 0,61309 | 2,58  | 5,99  | 0,00039 | NM_015042    | SMCR7L    |
| 8073135 | 0,30 | 1,23 | 0,44571 | 2,57  | 5,95  | 0,00053 | NM_019008    | ---       |
| 7924307 | 0,30 | 1,23 | 0,41069 | -1,35 | -2,54 | 0,06396 | ---          | AVEN      |
| 7987165 | 0,30 | 1,23 | 0,63541 | 1,03  | 2,04  | 0,00522 | NM_020371    | BLCAP     |
| 8066195 | 0,30 | 1,23 | 0,40141 | 0,62  | 1,54  | 0,07639 | NM_006698    | NAP1L3    |
| 8173917 | 0,30 | 1,23 | 0,35079 | -0,99 | -1,98 | 0,04597 | NM_004538    | CASP8AP2  |
| 8121118 | 0,30 | 1,23 | 0,57384 | 1,61  | 3,06  | 0,00233 | NM_012115    | FAM119A   |
| 8058486 | 0,30 | 1,23 | 0,20607 | 2,24  | 4,71  | 0,00004 | NM_145280    | OR2T2     |
| 7911281 | 0,29 | 1,23 | 0,70658 | -2,28 | -4,86 | 0,00033 | NM_001004136 | OR5B2     |
| 7948326 | 0,29 | 1,23 | 0,47118 | -0,34 | -1,27 | 0,08337 | NM_001005566 | GPRASP2   |
| 8168976 | 0,29 | 1,23 | 0,08339 | 0,66  | 1,58  | 0,00118 | NM_001004051 | HIST2H4A  |
| 7905067 | 0,29 | 1,23 | 0,33972 | 3,67  | 12,69 | 0,00023 | NM_003548    | HIST2H4A  |
| 7919627 | 0,29 | 1,23 | 0,33972 | 3,67  | 12,69 | 0,00023 | NM_003548    | UQCC      |
| 8065889 | 0,29 | 1,23 | 0,40443 | 1,78  | 3,44  | 0,00154 | NM_018244    | TMEM208   |
| 7996490 | 0,29 | 1,23 | 0,70297 | 0,81  | 1,75  | 0,27199 | NM_014187    | FLJ45950  |
| 7952673 | 0,29 | 1,23 | 0,31275 | -0,56 | -1,48 | 0,06350 | AK127847     | HLA-DMA   |
| 8125537 | 0,29 | 1,23 | 0,31805 | 3,05  | 8,30  | 0,00673 | NM_006120    | C14orf28  |
| 7974117 | 0,29 | 1,23 | 0,59131 | 1,67  | 3,17  | 0,00232 | NM_001017923 | GPR125    |
| 8099612 | 0,29 | 1,23 | 0,58312 | 2,70  | 6,48  | 0,00124 | NM_145290    | MIPOL1    |
| 7973985 | 0,29 | 1,23 | 0,14327 | 1,08  | 2,11  | 0,00286 | NM_138731    | CDKL5     |
| 8166289 | 0,29 | 1,22 | 0,50636 | 0,90  | 1,87  | 0,00492 | NM_001037343 | DAXX      |
| 8180179 | 0,29 | 1,22 | 0,39080 | -0,17 | -1,12 | 0,61083 | NM_001141969 | CBR4      |
| 8103622 | 0,29 | 1,22 | 0,42818 | 0,85  | 1,81  | 0,04557 | NM_032783    | DIAPH1    |
| 8114658 | 0,29 | 1,22 | 0,52745 | 2,68  | 6,41  | 0,00102 | NM_005219    | FAM180A   |
| 8143127 | 0,29 | 1,22 | 0,60510 | -0,74 | -1,67 | 0,06114 | NM_205855    | CTHRC1    |
| 8147777 | 0,29 | 1,22 | 0,29569 | 0,63  | 1,54  | 0,34044 | NM_138455    | ---       |
| 8131337 | 0,29 | 1,22 | 0,41968 | 0,17  | 1,13  | 0,52690 | ---          | PVRL2     |
| 8029507 | 0,29 | 1,22 | 0,27111 | 1,80  | 3,49  | 0,03580 | NM_002856    | RNF5P1    |
| 8178188 | 0,29 | 1,22 | 0,44870 | 1,65  | 3,14  | 0,00189 | NR_003129    | C1orf54   |
| 7905147 | 0,29 | 1,22 | 0,33753 | -0,99 | -1,99 | 0,01162 | NM_024579    | HSPA2     |
| 7975076 | 0,29 | 1,22 | 0,47914 | 0,45  | 1,37  | 0,17161 | NM_021979    | ALG2      |
| 8162827 | 0,29 | 1,22 | 0,27640 | 2,43  | 5,38  | 0,00215 | NR_024532    | PTPRF     |
| 7900792 | 0,29 | 1,22 | 0,63253 | 3,49  | 11,27 | 0,00158 | NM_002840    | ZNF226    |
| 8029399 | 0,29 | 1,22 | 0,49605 | 0,65  | 1,57  | 0,02182 | NM_001032372 | FAM133B   |
| 8105504 | 0,29 | 1,22 | 0,34282 | 0,17  | 1,12  | 0,45418 | NM_152789    | CANT1     |
| 8018982 | 0,29 | 1,22 | 0,47423 | 1,87  | 3,65  | 0,00456 | NM_138793    | ---       |
| 8031906 | 0,29 | 1,22 | 0,00348 | -1,02 | -2,03 | 0,13473 | ---          | DGKI      |
| 8143154 | 0,29 | 1,22 | 0,02603 | -0,92 | -1,89 | 0,00002 | NM_004717    | ZNF280A   |
| 8074853 | 0,29 | 1,22 | 0,16894 | 1,12  | 2,18  | 0,02044 | NM_080740    | ZNF773    |
| 8031759 | 0,29 | 1,22 | 0,39016 | 0,45  | 1,37  | 0,49002 | NM_198542    | C14orf106 |
| 7978776 | 0,29 | 1,22 | 0,19857 | 1,39  | 2,63  | 0,09944 | NM_018353    | THUMPD2   |
| 8051746 | 0,29 | 1,22 | 0,17118 | 2,29  | 4,90  | 0,00077 | NR_028102    | ISL1      |

|         |      |      |         |       |       |         |                    |              |
|---------|------|------|---------|-------|-------|---------|--------------------|--------------|
| 8105220 | 0,29 | 1,22 | 0,57069 | -0,62 | -1,54 | 0,01905 | NM_002202          | CLSTN1       |
| 7912257 | 0,29 | 1,22 | 0,53037 | 1,59  | 3,01  | 0,01377 | NM_001009566       | AR           |
| 8167998 | 0,29 | 1,22 | 0,28889 | -0,68 | -1,60 | 0,01130 | NM_000044          | KIAA0427     |
| 8021154 | 0,29 | 1,22 | 0,53022 | 0,44  | 1,36  | 0,33120 | NM_001142397       | RRBP1        |
| 8065136 | 0,29 | 1,22 | 0,24474 | 0,13  | 1,10  | 0,56212 | NM_001042576       | CCDC111      |
| 8098556 | 0,29 | 1,22 | 0,45572 | 1,51  | 2,84  | 0,02283 | NM_152683          | MTMR15       |
| 7982309 | 0,29 | 1,22 | 0,42681 | 0,62  | 1,53  | 0,02978 | NM_014967          | MAGI3        |
| 7904106 | 0,29 | 1,22 | 0,43305 | 1,94  | 3,84  | 0,00136 | NM_152900          | NUMBL        |
| 8036923 | 0,29 | 1,22 | 0,74314 | 0,29  | 1,22  | 0,29958 | NM_004756          | TMCO4        |
| 7913187 | 0,29 | 1,22 | 0,30111 | 0,53  | 1,45  | 0,19413 | NM_181719          | AGPAT3       |
| 8068952 | 0,29 | 1,22 | 0,54738 | 1,68  | 3,20  | 0,00715 | NM_020132          | UQCRB        |
| 8151909 | 0,29 | 1,22 | 0,28084 | 0,03  | 1,02  | 0,83934 | NM_006294          | ACPL2        |
| 8083075 | 0,29 | 1,22 | 0,42116 | 2,02  | 4,06  | 0,00487 | NM_152282          | THNSL1       |
| 7926708 | 0,29 | 1,22 | 0,34923 | 0,56  | 1,47  | 0,08219 | NM_024838          | WDR55        |
| 8108593 | 0,29 | 1,22 | 0,54570 | 0,70  | 1,63  | 0,30477 | NM_017706          | LOC100131848 |
| 7930917 | 0,29 | 1,22 | 0,69231 | -0,39 | -1,31 | 0,13257 | AK097099 ---       |              |
| 8139242 | 0,29 | 1,22 | 0,42897 | -1,77 | -3,40 | 0,00013 | --- TCEAL4         |              |
| 8169035 | 0,29 | 1,22 | 0,17163 | 0,33  | 1,26  | 0,18097 | NM_024863          | BAIAP2L1     |
| 8141206 | 0,29 | 1,22 | 0,35033 | 4,18  | 18,13 | 0,00189 | NM_018842          | ---          |
| 7994265 | 0,28 | 1,22 | 0,66586 | -3,00 | -7,99 | 0,00033 | --- PPIA           |              |
| 8124924 | 0,28 | 1,22 | 0,58082 | 0,34  | 1,27  | 0,15887 | ENST00000355968    | ZBTB5        |
| 8161224 | 0,28 | 1,22 | 0,37144 | 0,84  | 1,79  | 0,00598 | NM_014872          | PDCD2L       |
| 8027642 | 0,28 | 1,22 | 0,50424 | 2,29  | 4,90  | 0,00038 | NM_032346          | SLC45A1      |
| 7897416 | 0,28 | 1,22 | 0,39258 | 0,60  | 1,52  | 0,09493 | NM_001080397       | STRAG        |
| 7990309 | 0,28 | 1,22 | 0,45195 | -0,96 | -1,95 | 0,03472 | NM_022369          | C14orf142    |
| 7980990 | 0,28 | 1,22 | 0,43775 | 2,21  | 4,62  | 0,00291 | NM_032490          | BMF          |
| 7987454 | 0,28 | 1,22 | 0,10563 | 1,81  | 3,51  | 0,00824 | NM_001003940       | PHKG2        |
| 7994928 | 0,28 | 1,22 | 0,63750 | 3,05  | 8,27  | 0,00598 | NM_000294          | QDPR         |
| 8099541 | 0,28 | 1,22 | 0,66205 | 1,02  | 2,03  | 0,03905 | NM_000320          | FLAD1        |
| 7905831 | 0,28 | 1,22 | 0,06333 | 1,17  | 2,24  | 0,00312 | NM_025207          | WDR46        |
| 8125671 | 0,28 | 1,22 | 0,38830 | 1,14  | 2,21  | 0,01245 | NM_005452          | WDR46        |
| 8178939 | 0,28 | 1,22 | 0,38830 | 1,14  | 2,21  | 0,01245 | NM_005452          | CDRT4        |
| 8012918 | 0,28 | 1,22 | 0,29317 | 0,69  | 1,61  | 0,00411 | NM_173622          | EMB          |
| 8112007 | 0,28 | 1,22 | 0,50815 | 2,41  | 5,32  | 0,00099 | NM_198449          | TMEM185A     |
| 8175621 | 0,28 | 1,22 | 0,63815 | 1,17  | 2,25  | 0,04075 | NM_032508          | C9orf64      |
| 8162039 | 0,28 | 1,22 | 0,62361 | 3,98  | 15,73 | 0,00001 | NM_032307          | CYHR1        |
| 8153819 | 0,28 | 1,22 | 0,61464 | 1,10  | 2,14  | 0,00302 | NM_138496          | ---          |
| 8075817 | 0,28 | 1,22 | 0,57262 | -0,90 | -1,86 | 0,14755 | --- DDX59          |              |
| 7923221 | 0,28 | 1,22 | 0,17670 | 0,38  | 1,30  | 0,28560 | NM_001031725       | USP12        |
| 7970696 | 0,28 | 1,21 | 0,30352 | 0,89  | 1,86  | 0,00892 | NM_182488          | POLR2E       |
| 8032149 | 0,28 | 1,21 | 0,74463 | 1,39  | 2,61  | 0,06198 | NM_002695          | ANKRD36B     |
| 8043697 | 0,28 | 1,21 | 0,42962 | 1,35  | 2,54  | 0,00561 | NM_025190          | NYNRIN       |
| 7973724 | 0,28 | 1,21 | 0,67916 | -1,66 | -3,15 | 0,03358 | NM_025081          | DIO3         |
| 7976858 | 0,28 | 1,21 | 0,67365 | -0,72 | -1,65 | 0,05467 | NM_001362          | ANKS6        |
| 8162803 | 0,28 | 1,21 | 0,35025 | 1,68  | 3,20  | 0,01257 | NM_173551          | PPP5C        |
| 8029814 | 0,28 | 1,21 | 0,42416 | 0,75  | 1,69  | 0,00104 | NM_006247          | RNF149       |
| 8054329 | 0,28 | 1,21 | 0,58640 | 1,39  | 2,62  | 0,00446 | NM_173647          | ARFGAP1      |
| 8064042 | 0,28 | 1,21 | 0,37915 | 0,95  | 1,93  | 0,00232 | NM_175609          | ZKSCAN2      |
| 8000399 | 0,28 | 1,21 | 0,33410 | 1,02  | 2,03  | 0,06784 | NM_001012981       | TRUB2        |
| 8164428 | 0,28 | 1,21 | 0,53868 | 2,04  | 4,12  | 0,00337 | NM_015679          | PTDSS2       |
| 7937378 | 0,28 | 1,21 | 0,54990 | 1,93  | 3,81  | 0,00042 | NM_030783          | FTSJ3        |
| 8017437 | 0,28 | 1,21 | 0,23667 | 0,11  | 1,08  | 0,72502 | NM_017647          | C4orf36      |
| 8101616 | 0,28 | 1,21 | 0,49439 | 0,29  | 1,22  | 0,19985 | NM_144645          | UCKL1        |
| 8067756 | 0,28 | 1,21 | 0,48999 | 2,21  | 4,61  | 0,00017 | NM_017859          | ARID4A       |
| 7974621 | 0,28 | 1,21 | 0,64772 | 1,88  | 3,67  | 0,00169 | NM_002892          | FAM45B       |
| 8169928 | 0,28 | 1,21 | 0,81013 | -0,18 | -1,13 | 0,67635 | NR_027141          | FLJ36031     |
| 8142136 | 0,28 | 1,21 | 0,40984 | -0,36 | -1,28 | 0,46056 | NM_175884          | ZNF813       |
| 8030997 | 0,28 | 1,21 | 0,11685 | 0,26  | 1,19  | 0,25864 | NM_001004301       | ---          |
| 8061184 | 0,28 | 1,21 | 0,28551 | 0,01  | 1,01  | 0,94760 | ---                | ---          |
| 7982254 | 0,28 | 1,21 | 0,69601 | -0,36 | -1,28 | 0,14939 | ---                | ---          |
| 7987110 | 0,28 | 1,21 | 0,69601 | -0,36 | -1,28 | 0,14939 | ---                | FRZB         |
| 8057506 | 0,28 | 1,21 | 0,39835 | -0,73 | -1,66 | 0,00707 | NM_001463          | ARL17A       |
| 8016300 | 0,28 | 1,21 | 0,65038 | 1,27  | 2,41  | 0,02370 | NM_001113738       | OR51E1       |
| 7937952 | 0,28 | 1,21 | 0,25618 | -1,15 | -2,23 | 0,04299 | NM_152430          | FAM111B      |
| 7940147 | 0,28 | 1,21 | 0,61116 | 1,09  | 2,13  | 0,00279 | NM_198947          | UBE2V2       |
| 8146379 | 0,28 | 1,21 | 0,27907 | 0,32  | 1,25  | 0,08563 | NM_003350          | ANKRD36B     |
| 8054054 | 0,28 | 1,21 | 0,45793 | 1,47  | 2,77  | 0,01229 | NM_025190          | EEPDI        |
| 8132305 | 0,27 | 1,21 | 0,26062 | 0,05  | 1,04  | 0,81941 | NM_030636          | ZNF84        |
| 7960143 | 0,27 | 1,21 | 0,42900 | 1,72  | 3,30  | 0,00766 | NM_003428          | SMG5         |
| 7920944 | 0,27 | 1,21 | 0,43856 | 2,44  | 5,41  | 0,00078 | NM_015327          | RPS18P9      |
| 8122699 | 0,27 | 1,21 | 0,33904 | 0,33  | 1,26  | 0,47797 | BC071678 GABARAPL3 |              |
| 7991395 | 0,27 | 1,21 | 0,58208 | -0,73 | -1,65 | 0,24860 | NR_028287          | DENR         |
| 7959473 | 0,27 | 1,21 | 0,19396 | 1,57  | 2,98  | 0,00148 | NM_003677          | FKBP3        |

|         |      |      |         |       |       |         |                 |              |
|---------|------|------|---------|-------|-------|---------|-----------------|--------------|
| 7978766 | 0,27 | 1,21 | 0,22355 | 0,98  | 1,98  | 0,01276 | NM_002013       | GBP4         |
| 7917561 | 0,27 | 1,21 | 0,61333 | -0,69 | -1,61 | 0,00146 | NM_052941       | FAM19A2      |
| 7964631 | 0,27 | 1,21 | 0,55957 | -0,94 | -1,92 | 0,09255 | NM_178539       | PODXL2       |
| 8082368 | 0,27 | 1,21 | 0,58711 | 1,57  | 2,97  | 0,00914 | NM_015720       | GEMIN8       |
| 8171373 | 0,27 | 1,21 | 0,21479 | 0,03  | 1,02  | 0,94012 | NM_017856       | ITGA3        |
| 8008237 | 0,27 | 1,21 | 0,18154 | 4,31  | 19,83 | 0,00428 | NM_002204       | ---          |
| 8081943 | 0,27 | 1,21 | 0,55830 | -0,60 | -1,52 | 0,31824 | ---             | TMPRSS6      |
| 8072796 | 0,27 | 1,21 | 0,63752 | -0,64 | -1,56 | 0,04708 | NM_153609       | MATN3        |
| 8050537 | 0,27 | 1,21 | 0,53593 | 1,92  | 3,78  | 0,01039 | NM_002381       | ZNF76        |
| 8118915 | 0,27 | 1,21 | 0,23743 | 1,59  | 3,01  | 0,02776 | NM_003427       | PES1         |
| 8075406 | 0,27 | 1,20 | 0,22531 | -0,02 | -1,02 | 0,96491 | NM_014303       | ---          |
| 7969792 | 0,27 | 1,20 | 0,41475 | 0,43  | 1,35  | 0,00756 | ---             | ---          |
| 8171879 | 0,27 | 1,20 | 0,64766 | 1,36  | 2,56  | 0,00026 | ---             | PDE7A        |
| 8151074 | 0,27 | 1,20 | 0,60573 | 1,90  | 3,74  | 0,00103 | NM_002603       | C7orf70      |
| 8138088 | 0,27 | 1,20 | 0,48080 | 2,87  | 7,30  | 0,00010 | NM_001037163    | C21orf94     |
| 8068052 | 0,27 | 1,20 | 0,45250 | -0,86 | -1,81 | 0,20096 | NR_027246       | ZNF776       |
| 8031815 | 0,27 | 1,20 | 0,33270 | 0,58  | 1,49  | 0,02319 | NM_173632       | ALS2         |
| 8058295 | 0,27 | 1,20 | 0,07497 | 0,08  | 1,06  | 0,71058 | NM_020919       | ---          |
| 7974255 | 0,26 | 1,20 | 0,88166 | -3,11 | -8,65 | 0,00995 | ---             | BCAT2        |
| 8038202 | 0,26 | 1,20 | 0,50447 | 2,58  | 6,00  | 0,00323 | NM_001190       | ERI2         |
| 8000013 | 0,26 | 1,20 | 0,47382 | 1,84  | 3,58  | 0,01007 | NM_001142725    | TESK2        |
| 7915718 | 0,26 | 1,20 | 0,37555 | 0,15  | 1,11  | 0,44918 | NM_007170       | NXN          |
| 8010967 | 0,26 | 1,20 | 0,10083 | 1,81  | 3,50  | 0,02770 | NM_022463       | ANKH         |
| 8111101 | 0,26 | 1,20 | 0,44926 | 1,40  | 2,64  | 0,00801 | NM_054027       | LOC100130581 |
| 8015798 | 0,26 | 1,20 | 0,31363 | 3,13  | 8,78  | 0,00013 | NR_027413       | C5orf34      |
| 8111960 | 0,26 | 1,20 | 0,36602 | 1,79  | 3,45  | 0,02602 | BC036867        | INSR         |
| 8033362 | 0,26 | 1,20 | 0,62365 | 1,86  | 3,63  | 0,00780 | NM_000208       | BCS1L        |
| 8048370 | 0,26 | 1,20 | 0,47103 | 2,16  | 4,47  | 0,00218 | NM_004328       | ---          |
| 8115884 | 0,26 | 1,20 | 0,64011 | -0,52 | -1,43 | 0,29775 | ---             | MRPL12       |
| 8010664 | 0,26 | 1,20 | 0,43974 | 1,67  | 3,18  | 0,05946 | NM_002949       | KBTBD3       |
| 7951429 | 0,26 | 1,20 | 0,06423 | -0,21 | -1,15 | 0,48486 | NM_198439       | RNASEH2A     |
| 8026051 | 0,26 | 1,20 | 0,51701 | 1,66  | 3,16  | 0,00201 | NM_006397       | ZBTB43       |
| 8157933 | 0,26 | 1,20 | 0,64247 | 1,24  | 2,36  | 0,02154 | NM_014007       | C15orf42     |
| 7985873 | 0,26 | 1,20 | 0,23909 | 2,03  | 4,09  | 0,01911 | NM_152259       | ZBED4        |
| 8073943 | 0,26 | 1,20 | 0,46782 | 1,79  | 3,47  | 0,00017 | NM_014838       | RNF19B       |
| 7914603 | 0,26 | 1,20 | 0,35437 | 1,91  | 3,75  | 0,01862 | NM_153341       | GNA11        |
| 8024566 | 0,26 | 1,20 | 0,30720 | 1,07  | 2,10  | 0,05657 | ENST00000433476 | IL6          |
| 8138542 | 0,26 | 1,20 | 0,50553 | 0,31  | 1,24  | 0,33609 | NM_000600       | AKR1E2       |
| 7925904 | 0,26 | 1,20 | 0,35801 | 3,51  | 11,39 | 0,00042 | NM_001040177    | TBC1D9       |
| 8102912 | 0,26 | 1,20 | 0,53645 | 1,43  | 2,69  | 0,02258 | NM_015130       | CAPS2        |
| 7964997 | 0,26 | 1,20 | 0,19634 | 0,27  | 1,21  | 0,48808 | NM_032606       | RELL1        |
| 8099797 | 0,26 | 1,20 | 0,38087 | 0,14  | 1,10  | 0,82434 | NM_001085399    | LTBP2        |
| 7980152 | 0,26 | 1,20 | 0,57142 | 1,56  | 2,96  | 0,01521 | NM_000428       | ---          |
| 8090349 | 0,26 | 1,20 | 0,58655 | -0,16 | -1,11 | 0,35527 | ---             | MTHFD1       |
| 7975045 | 0,26 | 1,20 | 0,65974 | 2,44  | 5,44  | 0,00028 | NM_005956       | PGBD2        |
| 7911301 | 0,26 | 1,20 | 0,13088 | -0,15 | -1,11 | 0,36022 | NM_170725       | HSP90AA2     |
| 7947245 | 0,26 | 1,20 | 0,60441 | -0,29 | -1,22 | 0,29627 | M30627          | CREM         |
| 7926983 | 0,26 | 1,19 | 0,18502 | -0,02 | -1,01 | 0,90506 | NM_183013       | WDR92        |
| 8052703 | 0,26 | 1,19 | 0,14462 | 0,64  | 1,55  | 0,06518 | NM_138458       | ITGA8        |
| 7932254 | 0,26 | 1,19 | 0,68484 | -0,98 | -1,98 | 0,02854 | NM_003638       | RAP2B        |
| 8083457 | 0,26 | 1,19 | 0,53009 | 1,21  | 2,31  | 0,04865 | NM_002886       | PLA2G1B      |
| 7967034 | 0,26 | 1,19 | 0,33672 | -0,49 | -1,41 | 0,25070 | NM_000928       | URB1         |
| 8069943 | 0,26 | 1,19 | 0,31538 | 1,93  | 3,82  | 0,00149 | NM_014825       | KIF26B       |
| 7911114 | 0,26 | 1,19 | 0,38395 | -1,08 | -2,11 | 0,00433 | NM_018012       | ---          |
| 8102875 | 0,26 | 1,19 | 0,71328 | -0,56 | -1,48 | 0,18669 | ---             | HBEGF        |
| 8114572 | 0,26 | 1,19 | 0,51839 | 2,08  | 4,22  | 0,00222 | NM_001945       | KIAA0892     |
| 8027184 | 0,26 | 1,19 | 0,59906 | 1,83  | 3,55  | 0,02850 | NM_015329       | NR1D1        |
| 8014956 | 0,26 | 1,19 | 0,57201 | 0,96  | 1,95  | 0,01959 | NM_021724       | DCDC2        |
| 8124196 | 0,25 | 1,19 | 0,12124 | -0,91 | -1,88 | 0,00665 | NM_016356       | ENTPD5       |
| 7980080 | 0,25 | 1,19 | 0,64146 | 2,30  | 4,92  | 0,00070 | NM_001249       | KLHL29       |
| 8040490 | 0,25 | 1,19 | 0,09943 | 0,71  | 1,63  | 0,07496 | NM_052920       | PFDN4        |
| 8063453 | 0,25 | 1,19 | 0,11321 | 0,14  | 1,11  | 0,45017 | NM_002623       | C6orf182     |
| 8121392 | 0,25 | 1,19 | 0,36063 | -0,11 | -1,08 | 0,44836 | NM_001083535    | SRGAP2       |
| 7909175 | 0,25 | 1,19 | 0,56923 | 3,28  | 9,69  | 0,00029 | NM_015326       | LOC284757    |
| 8063793 | 0,25 | 1,19 | 0,53098 | -1,16 | -2,24 | 0,00522 | AK128288        | FAM19A1      |
| 8080918 | 0,25 | 1,19 | 0,65747 | -0,97 | -1,96 | 0,03424 | NM_213609       | HIST4H4      |
| 7961483 | 0,25 | 1,19 | 0,15766 | 0,03  | 1,02  | 0,90811 | NM_175054       | MAST4        |
| 8105741 | 0,25 | 1,19 | 0,27797 | 0,45  | 1,36  | 0,05097 | NM_001164664    | RNF150       |
| 8102938 | 0,25 | 1,19 | 0,35939 | 0,35  | 1,28  | 0,03557 | NM_020724       | TCN2         |
| 8072360 | 0,25 | 1,19 | 0,50901 | 0,49  | 1,41  | 0,08317 | NM_000355       | CDC7         |
| 7902913 | 0,25 | 1,19 | 0,39801 | 1,48  | 2,79  | 0,04008 | NM_003503       | NAB1         |
| 8047086 | 0,25 | 1,19 | 0,61834 | 1,48  | 2,80  | 0,00076 | NM_005966       | LRAT         |
| 8097920 | 0,25 | 1,19 | 0,09816 | -1,05 | -2,07 | 0,03922 | NM_004744       | RNF185       |

|         |      |      |         |       |       |         |                    |             |
|---------|------|------|---------|-------|-------|---------|--------------------|-------------|
| 8072454 | 0,25 | 1,19 | 0,51771 | 0,54  | 1,46  | 0,23327 | NR_024210          | CCNE1       |
| 8027402 | 0,25 | 1,19 | 0,15031 | 2,82  | 7,06  | 0,00004 | NM_001238          | THAP11      |
| 7996675 | 0,25 | 1,19 | 0,47192 | 1,74  | 3,33  | 0,01434 | NM_020457          | ZNF600      |
| 8038989 | 0,25 | 1,19 | 0,38549 | 1,27  | 2,41  | 0,00664 | NM_198457          | ---         |
| 7906305 | 0,25 | 1,19 | 0,57385 | 1,42  | 2,67  | 0,04095 | ---                | INPP4A      |
| 8043791 | 0,25 | 1,19 | 0,67544 | 1,98  | 3,94  | 0,01012 | NM_001134225       | ZNF286A     |
| 8005110 | 0,25 | 1,19 | 0,45488 | 1,85  | 3,61  | 0,00220 | NM_020652          | WDR63       |
| 7902660 | 0,25 | 1,19 | 0,35340 | -1,11 | -2,15 | 0,00372 | NM_145172          | LMO4        |
| 7902810 | 0,25 | 1,19 | 0,42761 | 0,75  | 1,69  | 0,01385 | NM_006769          | LOC441601   |
| 7948092 | 0,25 | 1,19 | 0,56644 | -0,08 | -1,05 | 0,58658 | NR_003034          | KIAA1949    |
| 8124798 | 0,25 | 1,19 | 0,27772 | 1,21  | 2,31  | 0,02810 | NM_133471          | PPP1R3B     |
| 8149264 | 0,25 | 1,19 | 0,10096 | 0,95  | 1,93  | 0,00350 | NM_024607          | MYH11       |
| 7999674 | 0,25 | 1,19 | 0,43507 | -0,95 | -1,94 | 0,02054 | NM_022844          | C2orf86     |
| 8052598 | 0,25 | 1,19 | 0,55600 | 1,78  | 3,44  | 0,02254 | NM_015910          | HIST1H2AC   |
| 8117372 | 0,25 | 1,19 | 0,56576 | 1,69  | 3,23  | 0,00648 | NM_003512          | SLITRK4     |
| 8175574 | 0,25 | 1,19 | 0,30552 | -0,69 | -1,61 | 0,16759 | NM_173078          | ALDH3B1     |
| 7941961 | 0,25 | 1,19 | 0,32294 | 2,09  | 4,24  | 0,03497 | NM_000694          | MCM8        |
| 8060813 | 0,25 | 1,19 | 0,63371 | 2,69  | 6,46  | 0,00010 | NM_032485          | hCG_1990547 |
| 8144503 | 0,25 | 1,19 | 0,51716 | -0,68 | -1,60 | 0,28605 | ENST00000310542    | ---         |
| 7916225 | 0,25 | 1,19 | 0,30285 | 0,30  | 1,23  | 0,20983 | ---                | DAXX        |
| 8125734 | 0,25 | 1,19 | 0,50881 | -0,19 | -1,14 | 0,50173 | NM_001141969       | CNKSR2      |
| 8166355 | 0,25 | 1,19 | 0,63306 | -1,31 | -2,48 | 0,00016 | NM_014927          | SSR4        |
| 8170775 | 0,25 | 1,19 | 0,60536 | 0,04  | 1,03  | 0,87232 | NM_006280          | ZNF778      |
| 7997904 | 0,25 | 1,19 | 0,91228 | 0,73  | 1,65  | 0,24886 | AK295122 TPTE2P3   |             |
| 7969256 | 0,25 | 1,19 | 0,50356 | -0,13 | -1,09 | 0,37748 | NR_002793          | VDR         |
| 7962689 | 0,25 | 1,19 | 0,48362 | 1,03  | 2,04  | 0,03943 | NM_001017535       | CCDC94      |
| 8024798 | 0,25 | 1,19 | 0,59086 | 1,55  | 2,93  | 0,00074 | NM_018074          | HTR2A       |
| 7971526 | 0,24 | 1,19 | 0,22021 | -1,17 | -2,25 | 0,06679 | NM_000621          | C3orf52     |
| 8081645 | 0,24 | 1,18 | 0,32915 | 0,49  | 1,40  | 0,10957 | NM_024616          | STUB1       |
| 7992021 | 0,24 | 1,18 | 0,60005 | 0,65  | 1,56  | 0,04702 | NM_005861          | DTD1        |
| 8061211 | 0,24 | 1,18 | 0,54846 | 0,90  | 1,86  | 0,23834 | NM_080820          | EP400       |
| 7959995 | 0,24 | 1,18 | 0,25256 | 2,49  | 5,60  | 0,00004 | NM_015409          | DIS3L2      |
| 8049097 | 0,24 | 1,18 | 0,69745 | 0,58  | 1,49  | 0,23842 | NM_152383          | IQUB        |
| 8142646 | 0,24 | 1,18 | 0,41647 | -0,72 | -1,64 | 0,00302 | NM_178827          | HSPC072     |
| 8065242 | 0,24 | 1,18 | 0,30124 | -1,53 | -2,89 | 0,10228 | AF161557 ZNF215    |             |
| 7938183 | 0,24 | 1,18 | 0,29727 | 0,53  | 1,44  | 0,20377 | NM_013250          | GK5         |
| 8091120 | 0,24 | 1,18 | 0,40446 | 1,95  | 3,86  | 0,00649 | NR_033289          | SGCZ        |
| 8149438 | 0,24 | 1,18 | 0,14181 | -1,06 | -2,09 | 0,01632 | NM_139167          | FAM129B     |
| 8164217 | 0,24 | 1,18 | 0,37040 | 2,08  | 4,22  | 0,00862 | NM_022833          | NACAD       |
| 8139460 | 0,24 | 1,18 | 0,62037 | -1,10 | -2,14 | 0,00001 | NM_001146334       | CHD6        |
| 8066303 | 0,24 | 1,18 | 0,50885 | 1,18  | 2,26  | 0,00855 | NM_032221          | MGC4294     |
| 8063634 | 0,24 | 1,18 | 0,63730 | -1,27 | -2,41 | 0,01020 | ENST00000419204    | ABTB2       |
| 7947462 | 0,24 | 1,18 | 0,61621 | 2,50  | 5,65  | 0,00182 | NM_145804          | PPAPDC2     |
| 8154151 | 0,24 | 1,18 | 0,54964 | 1,01  | 2,01  | 0,03245 | NM_203453          | MT4         |
| 7995772 | 0,24 | 1,18 | 0,61629 | -0,06 | -1,05 | 0,62471 | NM_032935          | ESM1        |
| 8112045 | 0,24 | 1,18 | 0,59201 | -0,94 | -1,92 | 0,05097 | NM_007036          | NCAPD3      |
| 7952830 | 0,24 | 1,18 | 0,43672 | 3,16  | 8,92  | 0,00116 | NM_015261          | FAM124A     |
| 7969192 | 0,24 | 1,18 | 0,26751 | 0,63  | 1,55  | 0,00315 | BC051771 C21orf128 |             |
| 8070563 | 0,24 | 1,18 | 0,71533 | -0,60 | -1,52 | 0,03565 | NR_027243          | C6orf170    |
| 8129273 | 0,24 | 1,18 | 0,16260 | -0,38 | -1,30 | 0,22214 | NM_152730          | ANO5        |
| 7938951 | 0,24 | 1,18 | 0,68780 | -1,16 | -2,23 | 0,01401 | NM_213599          | ---         |
| 8112666 | 0,24 | 1,18 | 0,67403 | -0,09 | -1,07 | 0,79310 | ---                | PTOV1       |
| 8030525 | 0,24 | 1,18 | 0,43802 | 1,30  | 2,46  | 0,02023 | NM_017432          | SV2A        |
| 7919645 | 0,24 | 1,18 | 0,55500 | 1,71  | 3,28  | 0,00952 | NM_014849          | TMEM64      |
| 8151747 | 0,24 | 1,18 | 0,55231 | 1,64  | 3,12  | 0,00098 | NM_001008495       | BEX1        |
| 8174201 | 0,24 | 1,18 | 0,48467 | -0,92 | -1,90 | 0,05560 | NM_018476          | ---         |
| 8065633 | 0,24 | 1,18 | 0,35920 | 0,53  | 1,45  | 0,08945 | ---                | NOP14       |
| 8099051 | 0,24 | 1,18 | 0,54386 | 1,71  | 3,28  | 0,00087 | NM_003703          | RPUSD2      |
| 7982753 | 0,24 | 1,18 | 0,41931 | 0,78  | 1,72  | 0,31328 | NM_152260          | GPATCH1     |
| 8027521 | 0,24 | 1,18 | 0,19235 | 0,78  | 1,72  | 0,03068 | NM_018025          | MAP1LC3A    |
| 8062023 | 0,24 | 1,18 | 0,64580 | -0,29 | -1,23 | 0,48650 | NM_032514          | LUC7L3      |
| 8008493 | 0,24 | 1,18 | 0,55866 | 1,73  | 3,31  | 0,00040 | NM_016424          | LOC81691    |
| 7993776 | 0,24 | 1,18 | 0,28723 | 0,00  | 1,00  | 0,99725 | NM_030941          | SAT2        |
| 8012247 | 0,24 | 1,18 | 0,51441 | 1,80  | 3,47  | 0,00102 | NM_133491          | ---         |
| 7913154 | 0,24 | 1,18 | 0,62303 | 2,12  | 4,34  | 0,00097 | ---                | RCN3        |
| 8030383 | 0,24 | 1,18 | 0,49465 | 0,22  | 1,16  | 0,57907 | NM_020650          | RDH14       |
| 8050474 | 0,24 | 1,18 | 0,54681 | 1,95  | 3,87  | 0,00038 | NM_020905          | HIST1H1A    |
| 8124380 | 0,24 | 1,18 | 0,63686 | -0,77 | -1,71 | 0,01935 | NM_005325          | MRI1        |
| 8026182 | 0,24 | 1,18 | 0,51453 | 2,33  | 5,03  | 0,00080 | NM_001031727       | KIAA0513    |
| 7997662 | 0,23 | 1,18 | 0,55709 | 0,16  | 1,12  | 0,54632 | NM_014732          | ST7L        |
| 7918569 | 0,23 | 1,18 | 0,44100 | 0,29  | 1,22  | 0,38021 | NM_017744          | AIMP1       |
| 8096718 | 0,23 | 1,18 | 0,34260 | 0,30  | 1,24  | 0,05761 | NM_004757          | ZNF549      |
| 8031762 | 0,23 | 1,18 | 0,45834 | 0,49  | 1,40  | 0,08538 | NM_153263          | KLHL3       |



|         |      |      |         |       |       |         |                 |              |
|---------|------|------|---------|-------|-------|---------|-----------------|--------------|
| 8114300 | 0,23 | 1,18 | 0,55513 | -0,16 | -1,12 | 0,80287 | NM_017415       | XPC          |
| 8085486 | 0,23 | 1,18 | 0,26232 | 0,02  | 1,01  | 0,92307 | NM_004628       | HYDIN        |
| 8002481 | 0,23 | 1,18 | 0,68564 | -2,33 | -5,03 | 0,00004 | NM_032821       | TLE2         |
| 8032553 | 0,23 | 1,18 | 0,61174 | 1,54  | 2,90  | 0,04949 | NM_003260       | SPATA20      |
| 8008388 | 0,23 | 1,18 | 0,70082 | 1,92  | 3,78  | 0,00708 | NM_022827       | LOC100129449 |
| 8055911 | 0,23 | 1,18 | 0,43406 | -0,76 | -1,69 | 0,03812 | ENST00000428580 | CLN8         |
| 8144279 | 0,23 | 1,17 | 0,33928 | 0,71  | 1,63  | 0,00551 | NM_018941       | OR2T35       |
| 7925757 | 0,23 | 1,17 | 0,74412 | -1,91 | -3,76 | 0,00077 | NM_001001827    | ZNF414       |
| 8033598 | 0,23 | 1,17 | 0,59638 | 0,14  | 1,10  | 0,73813 | NM_032370       | IL26         |
| 7964795 | 0,23 | 1,17 | 0,53531 | -0,35 | -1,27 | 0,30774 | NM_018402       | GRPEL2       |
| 8109141 | 0,23 | 1,17 | 0,68367 | 1,42  | 2,67  | 0,01272 | NM_152407       | ZNF124       |
| 7925691 | 0,23 | 1,17 | 0,38383 | 0,88  | 1,85  | 0,04230 | NM_003431       | PLD2         |
| 8003962 | 0,23 | 1,17 | 0,67651 | 2,26  | 4,79  | 0,00353 | NM_002663       | RBM3         |
| 8167234 | 0,23 | 1,17 | 0,25467 | 0,00  | 1,00  | 0,98676 | NM_006743       | C22orf42     |
| 8075555 | 0,23 | 1,17 | 0,53597 | -1,10 | -2,14 | 0,00531 | NM_001010859    | C1orf91      |
| 7914500 | 0,23 | 1,17 | 0,64350 | 0,08  | 1,06  | 0,39566 | AF258548 MTSS1L |              |
| 8002403 | 0,23 | 1,17 | 0,70600 | 1,72  | 3,31  | 0,01576 | NM_138383       | LOC644936    |
| 8112883 | 0,23 | 1,17 | 0,35751 | -0,13 | -1,09 | 0,74381 | NR_004845       | ZNF187       |
| 8117667 | 0,23 | 1,17 | 0,42112 | 1,93  | 3,81  | 0,01254 | NM_001023560    | WBP1         |
| 8042867 | 0,23 | 1,17 | 0,10299 | 1,98  | 3,96  | 0,00739 | NM_012477       | SNORA61      |
| 7914212 | 0,23 | 1,17 | 0,65035 | 2,14  | 4,41  | 0,00534 | NR_002987       | AK2          |
| 7914617 | 0,23 | 1,17 | 0,69688 | 2,14  | 4,40  | 0,00101 | NM_013411       | NDUFA5       |
| 8142663 | 0,23 | 1,17 | 0,65430 | -0,31 | -1,24 | 0,35259 | NM_005000       | C9orf119     |
| 8158204 | 0,23 | 1,17 | 0,23187 | 1,13  | 2,18  | 0,05577 | NM_001040011    | RPL39L       |
| 8092654 | 0,23 | 1,17 | 0,19518 | 0,64  | 1,55  | 0,07347 | NM_052969       | C18orf45     |
| 8022514 | 0,23 | 1,17 | 0,57146 | 1,86  | 3,64  | 0,01240 | NM_032933       | FIGF         |
| 8171427 | 0,23 | 1,17 | 0,34087 | -0,59 | -1,50 | 0,08488 | NM_004469       | THOC6        |
| 7992795 | 0,23 | 1,17 | 0,70826 | 2,57  | 5,93  | 0,00510 | NM_024339       | BAT2L1       |
| 8158839 | 0,23 | 1,17 | 0,41509 | 3,10  | 8,56  | 0,00518 | NM_013318       | RREB1        |
| 8116740 | 0,23 | 1,17 | 0,35090 | 2,08  | 4,23  | 0,00051 | NM_001168344    | MTHFSD       |
| 8003233 | 0,23 | 1,17 | 0,58403 | 0,61  | 1,52  | 0,05149 | NM_001159377    | HIST1H4J     |
| 8117598 | 0,23 | 1,17 | 0,02333 | 0,96  | 1,95  | 0,02374 | NM_021968       | RNF168       |
| 8093130 | 0,23 | 1,17 | 0,54691 | 0,91  | 1,88  | 0,04941 | NM_152617       | LRRC47       |
| 7911862 | 0,23 | 1,17 | 0,49875 | 1,07  | 2,10  | 0,07948 | NM_020710       | SEN3         |
| 8004485 | 0,23 | 1,17 | 0,10027 | 1,43  | 2,70  | 0,00233 | NM_015670       | PSMG3        |
| 8137798 | 0,23 | 1,17 | 0,76367 | 2,76  | 6,80  | 0,00024 | NM_032302       | MAD1L1       |
| 8137805 | 0,23 | 1,17 | 0,12608 | -0,33 | -1,26 | 0,35520 | NM_003550       | POLA1        |
| 8166525 | 0,23 | 1,17 | 0,36258 | 1,84  | 3,58  | 0,00137 | NM_016937       | DAXX         |
| 8178991 | 0,23 | 1,17 | 0,53315 | -0,37 | -1,29 | 0,32145 | NM_001141969    | HMGXB3       |
| 8109201 | 0,23 | 1,17 | 0,32164 | 2,00  | 3,99  | 0,00420 | NM_014983       | KIF18A       |
| 7947248 | 0,23 | 1,17 | 0,41241 | 1,60  | 3,04  | 0,00384 | NM_031217       | ZNF341       |
| 8061946 | 0,23 | 1,17 | 0,70309 | 0,17  | 1,13  | 0,14808 | NM_032819       | GPKOW        |
| 8172548 | 0,23 | 1,17 | 0,51663 | 1,17  | 2,25  | 0,06519 | NM_015698       | MED11        |
| 8003922 | 0,23 | 1,17 | 0,33729 | 1,58  | 2,99  | 0,01194 | NM_001001683    | ST6GAL1      |
| 8084717 | 0,22 | 1,17 | 0,68586 | 2,71  | 6,54  | 0,00004 | NM_173216       | C19orf47     |
| 8036867 | 0,22 | 1,17 | 0,52867 | 0,31  | 1,24  | 0,36650 | BC027935 AQP4   |              |
| 8022655 | 0,22 | 1,17 | 0,38216 | -0,70 | -1,62 | 0,04038 | NM_001650       | C7orf64      |
| 8134211 | 0,22 | 1,17 | 0,45123 | 0,84  | 1,79  | 0,12035 | NM_032120       | TRAF4        |
| 8005978 | 0,22 | 1,17 | 0,52328 | 1,96  | 3,90  | 0,00019 | NM_004295       | HDAC7        |
| 7962659 | 0,22 | 1,17 | 0,75536 | 0,45  | 1,37  | 0,25267 | NM_015401       | C16orf45     |
| 7993458 | 0,22 | 1,17 | 0,61961 | 1,04  | 2,06  | 0,04343 | NM_033201       | SHB          |
| 8161255 | 0,22 | 1,17 | 0,53355 | 0,57  | 1,49  | 0,11209 | NM_003028       | CECR1        |
| 8074237 | 0,22 | 1,17 | 0,73030 | -1,27 | -2,42 | 0,00945 | NM_017424       | CLEC2D       |
| 7953878 | 0,22 | 1,17 | 0,27411 | 0,09  | 1,06  | 0,68630 | NM_001004419    | SMCHD1       |
| 8019877 | 0,22 | 1,17 | 0,51304 | 2,51  | 5,71  | 0,00011 | NM_015295       | PHF7         |
| 8080306 | 0,22 | 1,17 | 0,42780 | 1,35  | 2,54  | 0,00436 | NM_016483       | MIR330       |
| 8037640 | 0,22 | 1,17 | 0,48408 | -0,60 | -1,52 | 0,08893 | NR_029886       | ACSF2        |
| 8008321 | 0,22 | 1,17 | 0,62052 | 1,35  | 2,54  | 0,02022 | NM_025149       | COMMD9       |
| 7947531 | 0,22 | 1,17 | 0,64950 | 1,42  | 2,68  | 0,00095 | NM_014186       | HK1          |
| 7928019 | 0,22 | 1,17 | 0,51154 | 0,07  | 1,05  | 0,85724 | NM_033500       | KIAA0182     |
| 7997680 | 0,22 | 1,17 | 0,62452 | 1,59  | 3,01  | 0,00029 | NM_014615       | EXD2         |
| 7975311 | 0,22 | 1,17 | 0,35004 | 1,63  | 3,09  | 0,01455 | NM_018199       | TMEM134      |
| 7949798 | 0,22 | 1,17 | 0,73536 | 0,66  | 1,58  | 0,07959 | NM_025124       | MKI67        |
| 7937020 | 0,22 | 1,17 | 0,04533 | 1,56  | 2,96  | 0,00700 | NM_002417       | UBIAD1       |
| 7897685 | 0,22 | 1,17 | 0,49252 | 2,63  | 6,18  | 0,00084 | NM_013319       | TMEM203      |
| 8165486 | 0,22 | 1,17 | 0,54265 | 2,87  | 7,29  | 0,00039 | NM_053045       | DSTYK        |
| 7923731 | 0,22 | 1,17 | 0,39973 | 0,48  | 1,39  | 0,06679 | NM_015375       | ---          |
| 8111913 | 0,22 | 1,17 | 0,69022 | -0,94 | -1,92 | 0,01714 | ---             | LARP7        |
| 8096938 | 0,22 | 1,17 | 0,46306 | 0,79  | 1,73  | 0,02841 | NM_016648       | LYSMD1       |
| 7919923 | 0,22 | 1,17 | 0,66645 | 0,49  | 1,40  | 0,23740 | NM_212551       | EEF1D        |
| 8153449 | 0,22 | 1,16 | 0,38213 | 0,85  | 1,80  | 0,06312 | NM_032378       | ASB13        |
| 7931863 | 0,22 | 1,16 | 0,56609 | 2,17  | 4,51  | 0,02772 | NM_024701       | LIN9         |
| 7924712 | 0,22 | 1,16 | 0,48996 | 1,86  | 3,62  | 0,01438 | NM_173083       | RANGAP1      |

|         |      |      |         |       |       |         |                 |           |
|---------|------|------|---------|-------|-------|---------|-----------------|-----------|
| 8076307 | 0,22 | 1,16 | 0,59913 | 2,06  | 4,18  | 0,00583 | NM_002883       | STK35     |
| 8060427 | 0,22 | 1,16 | 0,67804 | 1,61  | 3,05  | 0,00249 | NM_080836       | NDUFA11   |
| 8033069 | 0,22 | 1,16 | 0,53211 | 0,19  | 1,14  | 0,53950 | NM_175614       | STXBP6    |
| 7978376 | 0,22 | 1,16 | 0,37527 | -0,77 | -1,71 | 0,00343 | NM_014178       | CES1      |
| 8001457 | 0,22 | 1,16 | 0,79348 | -2,21 | -4,61 | 0,00034 | NM_001025195    | EIF2B5    |
| 8084303 | 0,22 | 1,16 | 0,57232 | 0,86  | 1,81  | 0,00948 | NM_003907       | HCFC1     |
| 8175947 | 0,22 | 1,16 | 0,53754 | 3,21  | 9,25  | 0,00263 | NM_005334       | BCOR      |
| 8172088 | 0,22 | 1,16 | 0,34835 | 2,07  | 4,20  | 0,00013 | NM_001123385    | COP55     |
| 8151136 | 0,22 | 1,16 | 0,37307 | 1,78  | 3,44  | 0,01947 | NM_006837       | GABRB3    |
| 7986822 | 0,22 | 1,16 | 0,36953 | -1,11 | -2,16 | 0,05004 | NM_000814       | GALNT4    |
| 7965357 | 0,22 | 1,16 | 0,65259 | 0,43  | 1,35  | 0,08607 | NM_003774       | PRO2012   |
| 7924817 | 0,22 | 1,16 | 0,43168 | -0,49 | -1,40 | 0,05970 | BC019830 CHRDL1 |           |
| 8174513 | 0,22 | 1,16 | 0,52588 | -1,65 | -3,15 | 0,00416 | NM_145234       | FAM128B   |
| 8045142 | 0,22 | 1,16 | 0,23705 | 0,00  | -1,00 | 0,99764 | NM_025029       | USP27X    |
| 8167601 | 0,22 | 1,16 | 0,66055 | 1,17  | 2,25  | 0,13028 | NM_001145073    | PKIG      |
| 8062852 | 0,22 | 1,16 | 0,62322 | -0,63 | -1,55 | 0,01040 | NM_181805       | OR4M2     |
| 7981781 | 0,22 | 1,16 | 0,76477 | -1,35 | -2,54 | 0,12875 | NM_001004719    | DCUN1D1   |
| 8092321 | 0,22 | 1,16 | 0,45665 | 1,14  | 2,20  | 0,01161 | NM_020640       | ---       |
| 7924069 | 0,22 | 1,16 | 0,37423 | 0,00  | 1,00  | 0,99948 | --- GAL3ST4     |           |
| 8141459 | 0,22 | 1,16 | 0,66429 | -1,30 | -2,46 | 0,05531 | NM_024637       | ---       |
| 7955635 | 0,22 | 1,16 | 0,24263 | -0,07 | -1,05 | 0,81113 | --- DYNC111     |           |
| 8134384 | 0,21 | 1,16 | 0,43678 | -0,84 | -1,79 | 0,01718 | NM_004411       | NR0B1     |
| 8171892 | 0,21 | 1,16 | 0,23311 | 1,73  | 3,31  | 0,01091 | NM_000475       | PHF10     |
| 8130916 | 0,21 | 1,16 | 0,53313 | 1,06  | 2,09  | 0,03244 | NM_018288       | SATB1     |
| 8085716 | 0,21 | 1,16 | 0,57866 | -0,78 | -1,72 | 0,11217 | NM_002971       | TUBA4A    |
| 8059177 | 0,21 | 1,16 | 0,29439 | 0,78  | 1,71  | 0,02813 | NM_006000       | ZNF354B   |
| 8110463 | 0,21 | 1,16 | 0,44472 | 1,69  | 3,23  | 0,00826 | NM_058230       | RGS5      |
| 7921916 | 0,21 | 1,16 | 0,64828 | -0,25 | -1,19 | 0,07184 | NM_003617       | DLEU1     |
| 7969171 | 0,21 | 1,16 | 0,61196 | 2,71  | 6,54  | 0,00039 | NR_002605       | SMTN      |
| 8072413 | 0,21 | 1,16 | 0,41012 | 0,08  | 1,06  | 0,86288 | NM_134269       | LIPT2     |
| 7950420 | 0,21 | 1,16 | 0,69274 | 1,99  | 3,97  | 0,01389 | NM_001144869    | CXorf19   |
| 8170213 | 0,21 | 1,16 | 0,57167 | -0,25 | -1,19 | 0,46593 | ENST00000309296 | ZNF669    |
| 7925677 | 0,21 | 1,16 | 0,46675 | 0,01  | 1,01  | 0,93826 | NM_024804       | IPCEF1    |
| 8130408 | 0,21 | 1,16 | 0,51573 | -0,73 | -1,66 | 0,00728 | NM_001130700    | LOC388955 |
| 8052622 | 0,21 | 1,16 | 0,70715 | 0,50  | 1,42  | 0,29671 | NR_003131       | PNPLA6    |
| 8025199 | 0,21 | 1,16 | 0,18841 | 1,04  | 2,06  | 0,14233 | NM_006702       | SHCBP1    |
| 8001133 | 0,21 | 1,16 | 0,16190 | 3,02  | 8,11  | 0,00043 | NM_024745       | FDX1      |
| 7943721 | 0,21 | 1,16 | 0,27056 | 1,90  | 3,74  | 0,01062 | NM_004109       | C21orf94  |
| 8022436 | 0,21 | 1,16 | 0,73709 | -0,63 | -1,55 | 0,36843 | NR_027246       | ZNF618    |
| 8157381 | 0,21 | 1,16 | 0,61242 | 2,23  | 4,70  | 0,00597 | NM_133374       | C4orf46   |
| 8103431 | 0,21 | 1,16 | 0,53404 | 0,35  | 1,27  | 0,56323 | NM_001008393    | ZFY       |
| 8176384 | 0,21 | 1,16 | 0,48823 | 0,91  | 1,88  | 0,00438 | NM_003411       | LCMT2     |
| 7988077 | 0,21 | 1,16 | 0,12960 | 0,85  | 1,80  | 0,02518 | NM_014793       | TMEM215   |
| 8154760 | 0,21 | 1,16 | 0,59393 | -0,39 | -1,31 | 0,21467 | NM_212558       | GTF3C5    |
| 8158961 | 0,21 | 1,16 | 0,63043 | 1,49  | 2,81  | 0,00397 | NM_001122823    | HSPG2     |
| 7913450 | 0,21 | 1,16 | 0,40364 | 0,79  | 1,72  | 0,13585 | NM_005529       | NBL1      |
| 7898585 | 0,21 | 1,15 | 0,28675 | -0,31 | -1,24 | 0,50771 | NM_182744       | POLR1C    |
| 8119842 | 0,21 | 1,15 | 0,63818 | 2,26  | 4,79  | 0,00151 | NM_203290       | ---       |
| 8041170 | 0,21 | 1,15 | 0,64640 | 0,42  | 1,34  | 0,55078 | --- IL32        |           |
| 7992828 | 0,21 | 1,15 | 0,57696 | -0,01 | -1,01 | 0,97373 | NM_001012631    | CDYL2     |
| 8002975 | 0,21 | 1,15 | 0,25832 | -0,86 | -1,82 | 0,01490 | NM_152342       | C17orf60  |
| 8009243 | 0,21 | 1,15 | 0,38298 | 0,36  | 1,28  | 0,05752 | NM_001085423    | ---       |
| 8144719 | 0,21 | 1,15 | 0,56445 | -1,04 | -2,05 | 0,12483 | --- KRTAP1-3    |           |
| 8015189 | 0,21 | 1,15 | 0,47243 | -1,78 | -3,43 | 0,00394 | NM_030966       | KRTAP1-3  |
| 8019585 | 0,21 | 1,15 | 0,47243 | -1,78 | -3,43 | 0,00394 | NM_030966       | ZNF57     |
| 8024532 | 0,21 | 1,15 | 0,55554 | 1,21  | 2,31  | 0,00031 | NM_173480       | TDRKH     |
| 7920057 | 0,21 | 1,15 | 0,38184 | 2,64  | 6,23  | 0,00007 | NM_001083965    | FAM200B   |
| 8094226 | 0,21 | 1,15 | 0,59282 | 0,77  | 1,71  | 0,06773 | NM_001145191    | PNO1      |
| 8042381 | 0,21 | 1,15 | 0,54189 | 0,95  | 1,93  | 0,02053 | NM_020143       | THAP4     |
| 8060274 | 0,21 | 1,15 | 0,05925 | 0,24  | 1,18  | 0,13548 | NM_015963       | THAP4     |
| 8077250 | 0,21 | 1,15 | 0,05925 | 0,24  | 1,18  | 0,13548 | NM_015963       | ---       |
| 8050869 | 0,21 | 1,15 | 0,45878 | -0,92 | -1,90 | 0,13047 | ---             | ---       |
| 8127696 | 0,21 | 1,15 | 0,82359 | -2,65 | -6,29 | 0,07784 | ---             | ---       |
| 8149200 | 0,21 | 1,15 | 0,82359 | -2,65 | -6,29 | 0,07784 | ---             | NPL       |
| 7908003 | 0,21 | 1,15 | 0,41324 | 0,30  | 1,23  | 0,35536 | NM_030769       | HIST1H4D  |
| 8124413 | 0,20 | 1,15 | 0,32156 | 0,46  | 1,38  | 0,17977 | NM_003539       | ZNF552    |
| 8031825 | 0,20 | 1,15 | 0,78939 | -0,18 | -1,13 | 0,81214 | NM_024762       | ---       |
| 8084945 | 0,20 | 1,15 | 0,38524 | -0,43 | -1,35 | 0,20279 | ---             | PHF17     |
| 8097417 | 0,20 | 1,15 | 0,64494 | 1,12  | 2,17  | 0,00077 | NM_199320       | ZNF189    |
| 8156935 | 0,20 | 1,15 | 0,65190 | 0,74  | 1,68  | 0,03594 | NM_003452       | PFKFB2    |
| 7909285 | 0,20 | 1,15 | 0,33404 | 2,00  | 3,99  | 0,00449 | NM_006212       | KLHL22    |
| 8074632 | 0,20 | 1,15 | 0,68944 | 0,83  | 1,77  | 0,05360 | NM_032775       | MPPED2    |
| 7947274 | 0,20 | 1,15 | 0,50827 | -1,20 | -2,30 | 0,03312 | NM_001584       | ZNF235    |

|                                                                         |      |      |         |       |       |         |                                     |                      |
|-------------------------------------------------------------------------|------|------|---------|-------|-------|---------|-------------------------------------|----------------------|
| 8037444                                                                 | 0,20 | 1,15 | 0,35743 | 0,19  | 1,14  | 0,48972 | NM_004234                           | C22orf24             |
| 8075550                                                                 | 0,20 | 1,15 | 0,65937 | -0,19 | -1,14 | 0,58899 | AK294232 NUF2                       |                      |
| 7906930                                                                 | 0,20 | 1,15 | 0,38634 | 2,06  | 4,18  | 0,00346 | NM_145697                           | B3GALT2              |
| 7923034                                                                 | 0,20 | 1,15 | 0,47339 | -1,07 | -2,10 | 0,01169 | NM_003783                           | OSGEP                |
| 7977571                                                                 | 0,20 | 1,15 | 0,17469 | 0,22  | 1,16  | 0,19764 | NM_017807                           | DHRS11               |
| 8006655                                                                 | 0,20 | 1,15 | 0,64157 | 2,98  | 7,90  | 0,00408 | NM_024308                           | C2orf24              |
| 8059097                                                                 | 0,20 | 1,15 | 0,10198 | 0,48  | 1,39  | 0,09814 | NM_015680                           | ---                  |
| 8009351                                                                 | 0,20 | 1,15 | 0,34968 | -0,48 | -1,40 | 0,22416 | ---                                 | GPR85                |
| 8142424                                                                 | 0,20 | 1,15 | 0,68374 | -0,91 | -1,88 | 0,05564 | NM_001146265                        | CCR10                |
| 8015681                                                                 | 0,20 | 1,15 | 0,71828 | -0,73 | -1,66 | 0,11293 | NM_016602                           | NVL                  |
| 7924558                                                                 | 0,20 | 1,15 | 0,39837 | 1,60  | 3,03  | 0,00419 | NM_002533                           | ENDOU                |
| 7962608                                                                 | 0,20 | 1,15 | 0,73061 | -1,14 | -2,20 | 0,06074 | NM_001172439                        | ALDOAP2              |
| 7936923                                                                 | 0,20 | 1,15 | 0,69696 | 0,53  | 1,44  | 0,00704 | M21191 ZBTB4                        |                      |
| 8012212                                                                 | 0,20 | 1,15 | 0,16971 | 0,93  | 1,91  | 0,07649 | NM_020899                           | KIF22                |
| 7994620                                                                 | 0,20 | 1,15 | 0,59262 | 1,95  | 3,87  | 0,00189 | NM_007317                           | ---                  |
| 8148930                                                                 | 0,20 | 1,15 | 0,56890 | -0,13 | -1,10 | 0,50899 | ---                                 | CP110                |
| 7993664                                                                 | 0,20 | 1,15 | 0,51704 | 2,39  | 5,23  | 0,00172 | NM_014711                           | CPNE8                |
| 7962250                                                                 | 0,20 | 1,15 | 0,42466 | 1,92  | 3,79  | 0,00051 | NM_153634                           | NDUFA1               |
| 8169659                                                                 | 0,20 | 1,15 | 0,61193 | -0,51 | -1,42 | 0,29534 | NM_004541                           | IRF9                 |
| 7973618                                                                 | 0,20 | 1,15 | 0,43038 | 0,92  | 1,90  | 0,09081 | NM_006084                           | DPY19L2P1            |
| 8138988                                                                 | 0,20 | 1,15 | 0,71700 | 0,11  | 1,08  | 0,84620 | NR_002833                           | MICAL1               |
| 8128737                                                                 | 0,20 | 1,15 | 0,28743 | 0,21  | 1,16  | 0,14858 | NM_022765                           | MGC72080             |
| 8138151                                                                 | 0,20 | 1,15 | 0,73372 | -0,14 | -1,10 | 0,79392 | NR_002822                           | PCDHB17              |
| 8108706                                                                 | 0,20 | 1,15 | 0,69075 | -0,68 | -1,60 | 0,03526 | NR_001280                           | CCDC101              |
| 7994362                                                                 | 0,20 | 1,15 | 0,66124 | 1,18  | 2,26  | 0,00053 | NM_138414                           | ---                  |
| 7995438                                                                 | 0,20 | 1,15 | 0,82883 | -0,03 | -1,02 | 0,87608 | ---                                 | CLN8                 |
| 8144267                                                                 | 0,20 | 1,15 | 0,44530 | 0,50  | 1,41  | 0,00437 | NM_018941                           | FDPSSL2A // FDPSSL2A |
| // FDPSSL2A // FDPSSL2A // FDPSSL2A // FDPSSL2A // FDPSSL2A // FDPSSL2A |      |      |         |       |       |         |                                     |                      |
| 8140443                                                                 | 0,20 | 1,15 | 0,34927 | 0,42  | 1,34  | 0,12514 | NR_003262 // NR_003262 // NR_003262 |                      |
| // NR_003262 // NR_003262 // NR_003262 // NR_003262 // NR_003262        |      |      |         |       |       |         | ELAC1                               |                      |
| 8021222                                                                 | 0,20 | 1,15 | 0,69085 | -0,56 | -1,48 | 0,29191 | NM_018696                           | SELK                 |
| 8088167                                                                 | 0,20 | 1,15 | 0,44831 | 1,48  | 2,78  | 0,08761 | NM_021237                           | RAB43                |
| 8001147                                                                 | 0,20 | 1,14 | 0,55606 | 1,71  | 3,27  | 0,04146 | NM_198490                           | ---                  |
| 7981317                                                                 | 0,19 | 1,14 | 0,55290 | -0,18 | -1,14 | 0,43067 | ---                                 | DZIP3                |
| 8081503                                                                 | 0,19 | 1,14 | 0,55118 | 1,11  | 2,15  | 0,05414 | NM_014648                           | LOC554223            |
| 8117773                                                                 | 0,19 | 1,14 | 0,66415 | 0,09  | 1,07  | 0,79199 | AK128290 S100A3                     |                      |
| 7920278                                                                 | 0,19 | 1,14 | 0,71553 | 0,09  | 1,06  | 0,79628 | NM_002960                           | RBKS                 |
| 8051215                                                                 | 0,19 | 1,14 | 0,31504 | 1,83  | 3,55  | 0,00101 | NM_022128                           | HYAL2                |
| 8087624                                                                 | 0,19 | 1,14 | 0,41359 | 0,04  | 1,03  | 0,80839 | NM_033158                           | GLT25D1              |
| 8026806                                                                 | 0,19 | 1,14 | 0,54743 | 1,76  | 3,38  | 0,01715 | NM_024656                           | ---                  |
| 8134349                                                                 | 0,19 | 1,14 | 0,14224 | 0,06  | 1,04  | 0,87430 | ---                                 | MRPL24               |
| 7921121                                                                 | 0,19 | 1,14 | 0,64129 | 1,64  | 3,11  | 0,01405 | NM_145729                           | NDST2                |
| 7934459                                                                 | 0,19 | 1,14 | 0,52292 | 1,46  | 2,75  | 0,02000 | NM_003635                           | TTK                  |
| 8120838                                                                 | 0,19 | 1,14 | 0,47945 | 1,36  | 2,57  | 0,03534 | NM_003318                           | SPTY2D1              |
| 7947040                                                                 | 0,19 | 1,14 | 0,14711 | 0,10  | 1,07  | 0,63414 | NM_194285                           | KCTD21               |
| 7942796                                                                 | 0,19 | 1,14 | 0,48595 | -0,11 | -1,08 | 0,71246 | NM_001029859                        | TBC1D12              |
| 7929424                                                                 | 0,19 | 1,14 | 0,60151 | 1,44  | 2,72  | 0,00706 | NM_015188                           | ---                  |
| 8009322                                                                 | 0,19 | 1,14 | 0,72177 | -0,69 | -1,61 | 0,17380 | ---                                 | FOXRED1              |
| 7945071                                                                 | 0,19 | 1,14 | 0,58479 | 1,91  | 3,75  | 0,03175 | NM_017547                           | TCEAL6               |
| 8174134                                                                 | 0,19 | 1,14 | 0,67045 | 1,03  | 2,04  | 0,00108 | NM_001006938                        | DYNC1I2              |
| 8046340                                                                 | 0,19 | 1,14 | 0,70166 | 0,13  | 1,10  | 0,66773 | NM_001378                           | MED16                |
| 8032106                                                                 | 0,19 | 1,14 | 0,62486 | 0,68  | 1,60  | 0,31944 | NM_005481                           | DNAJC2               |
| 8141898                                                                 | 0,19 | 1,14 | 0,54618 | 0,85  | 1,81  | 0,02503 | NM_014377                           | C20orf12             |
| 8065202                                                                 | 0,19 | 1,14 | 0,29504 | -0,04 | -1,03 | 0,43287 | NM_001099407                        | PLA2G15              |
| 7996761                                                                 | 0,19 | 1,14 | 0,61204 | 2,07  | 4,19  | 0,04543 | NM_012320                           | TRAF7                |
| 7992529                                                                 | 0,19 | 1,14 | 0,74878 | 1,83  | 3,55  | 0,00397 | NM_032271                           | SDCCAG3              |
| 8165156                                                                 | 0,19 | 1,14 | 0,65781 | 3,11  | 8,64  | 0,00006 | NM_001039707                        | SERPINI1             |
| 8083779                                                                 | 0,19 | 1,14 | 0,57005 | 0,06  | 1,04  | 0,87653 | NM_001122752                        | RSF1                 |
| 7950606                                                                 | 0,19 | 1,14 | 0,67381 | 1,07  | 2,10  | 0,00443 | NM_016578                           | N4BP2                |
| 8094719                                                                 | 0,19 | 1,14 | 0,47557 | 1,69  | 3,22  | 0,00507 | NM_018177                           | LOC400804            |
| 7924445                                                                 | 0,19 | 1,14 | 0,59127 | -1,22 | -2,32 | 0,03810 | AK128488 DPH1                       |                      |
| 8003700                                                                 | 0,19 | 1,14 | 0,34267 | 0,60  | 1,51  | 0,12243 | NM_001383                           | USP19                |
| 8087308                                                                 | 0,19 | 1,14 | 0,67264 | 1,74  | 3,35  | 0,02366 | NM_006677                           | ADPRHL2              |
| 7900087                                                                 | 0,19 | 1,14 | 0,70139 | 0,09  | 1,07  | 0,69740 | NM_017825                           | ZNF433               |
| 8034320                                                                 | 0,19 | 1,14 | 0,63991 | -0,45 | -1,37 | 0,18196 | NM_001080411                        | MAML3                |
| 8102862                                                                 | 0,19 | 1,14 | 0,40310 | 0,36  | 1,28  | 0,47413 | NM_018717                           | C8orf4               |
| 8146115                                                                 | 0,19 | 1,14 | 0,26799 | -0,15 | -1,11 | 0,14893 | NM_020130                           | NFIL3                |
| 8162276                                                                 | 0,19 | 1,14 | 0,33337 | 0,99  | 1,98  | 0,02523 | NM_005384                           | ELMOD3               |
| 8043131                                                                 | 0,19 | 1,14 | 0,59753 | 0,14  | 1,10  | 0,59822 | NM_001135021                        | TUBB8                |
| 8021919                                                                 | 0,19 | 1,14 | 0,72895 | 1,03  | 2,05  | 0,02009 | NM_177987                           | TSPAN13              |
| 8131600                                                                 | 0,19 | 1,14 | 0,52512 | 2,50  | 5,66  | 0,00005 | NM_014399                           | ASS1                 |
| 8158671                                                                 | 0,19 | 1,14 | 0,51411 | 2,64  | 6,23  | 0,00467 | NM_000050                           | MX2                  |
| 8068697                                                                 | 0,19 | 1,14 | 0,69448 | -1,47 | -2,76 | 0,01864 | NM_002463                           | PHYHD1               |

|         |      |      |         |       |       |         |                 |           |
|---------|------|------|---------|-------|-------|---------|-----------------|-----------|
| 8158431 | 0,19 | 1,14 | 0,74560 | 1,11  | 2,15  | 0,00018 | NM_001100876    | RAD51AP1  |
| 7953218 | 0,19 | 1,14 | 0,03572 | 1,38  | 2,61  | 0,00099 | NM_001130862    | ASXL1     |
| 8061725 | 0,19 | 1,14 | 0,40915 | 2,21  | 4,62  | 0,00057 | NM_015338       | FOXK2     |
| 8010820 | 0,19 | 1,14 | 0,70819 | 2,56  | 5,88  | 0,00957 | NM_004514       | TATDN1    |
| 8152759 | 0,18 | 1,14 | 0,30279 | 1,02  | 2,02  | 0,25147 | NR_027427       | SH3GL1    |
| 8032804 | 0,18 | 1,14 | 0,53731 | 2,39  | 5,24  | 0,02300 | NM_003025       | ---       |
| 8155248 | 0,18 | 1,14 | 0,57410 | -1,18 | -2,27 | 0,21294 | ---             | MAP1LC3B  |
| 7997740 | 0,18 | 1,14 | 0,74805 | -0,24 | -1,18 | 0,64217 | NM_022818       | PCDH814   |
| 8108744 | 0,18 | 1,14 | 0,63136 | 1,64  | 3,11  | 0,00962 | NM_018934       | FAT3      |
| 7943075 | 0,18 | 1,13 | 0,61463 | -1,50 | -2,84 | 0,00012 | NM_001008781    | ---       |
| 7935054 | 0,18 | 1,13 | 0,58459 | 0,15  | 1,11  | 0,52332 | ---             | MESDC2    |
| 7990830 | 0,18 | 1,13 | 0,51552 | 1,62  | 3,06  | 0,01391 | NM_015154       | MAN1C1    |
| 7899029 | 0,18 | 1,13 | 0,59784 | -1,16 | -2,24 | 0,01694 | NM_020379       | TNFAIP8L3 |
| 7988763 | 0,18 | 1,13 | 0,75201 | -1,41 | -2,66 | 0,00384 | NM_207381       | CWF19L1   |
| 7935730 | 0,18 | 1,13 | 0,52053 | 1,51  | 2,85  | 0,00006 | NM_018294       | ZNF175    |
| 8030831 | 0,18 | 1,13 | 0,67487 | 0,99  | 1,99  | 0,05603 | NM_007147       | SSSCA1    |
| 7941296 | 0,18 | 1,13 | 0,62665 | 2,03  | 4,09  | 0,00468 | NM_006396       | NTM       |
| 7945245 | 0,18 | 1,13 | 0,67754 | -1,24 | -2,36 | 0,00313 | NM_016522       | LOC348926 |
| 8099084 | 0,18 | 1,13 | 0,80708 | 0,94  | 1,92  | 0,26156 | NR_024253       | SNORD49A  |
| 8005202 | 0,18 | 1,13 | 0,32334 | -0,37 | -1,30 | 0,06343 | NR_002744       | PCSK5     |
| 8155898 | 0,18 | 1,13 | 0,49144 | -0,09 | -1,06 | 0,73665 | NM_006200       | ---       |
| 8082570 | 0,18 | 1,13 | 0,44511 | -0,44 | -1,36 | 0,06573 | ---             | SGCG      |
| 7968004 | 0,18 | 1,13 | 0,71889 | -0,60 | -1,52 | 0,04695 | NM_000231       | SPAM1     |
| 8135835 | 0,18 | 1,13 | 0,31575 | -1,25 | -2,37 | 0,00655 | NM_003117       | PQBP1     |
| 8167412 | 0,18 | 1,13 | 0,59965 | 0,98  | 1,97  | 0,02395 | NM_005710       | ---       |
| 8132913 | 0,18 | 1,13 | 0,18733 | -1,15 | -2,22 | 0,00511 | ---             | MCM3      |
| 8127031 | 0,18 | 1,13 | 0,64318 | 3,87  | 14,64 | 0,00013 | NM_002388       | SAMD4A    |
| 7974425 | 0,18 | 1,13 | 0,65795 | 0,32  | 1,25  | 0,26421 | NM_015589       | ARL13B    |
| 8081115 | 0,18 | 1,13 | 0,74853 | 1,32  | 2,49  | 0,00726 | NM_001174150    | ATP6V0B   |
| 7900922 | 0,18 | 1,13 | 0,65671 | 1,37  | 2,58  | 0,02724 | NM_004047       | RFXANK    |
| 8027139 | 0,18 | 1,13 | 0,79901 | 0,84  | 1,79  | 0,01575 | NM_003721       | GTPBP1    |
| 8073039 | 0,18 | 1,13 | 0,77727 | 0,86  | 1,82  | 0,04611 | NM_004286       | SLC7A14   |
| 8092053 | 0,18 | 1,13 | 0,71122 | -0,80 | -1,74 | 0,01999 | NM_020949       | SPRYD5    |
| 7939879 | 0,18 | 1,13 | 0,64646 | -0,45 | -1,37 | 0,21862 | NM_032681       | GSTO2     |
| 7930311 | 0,18 | 1,13 | 0,73521 | 2,37  | 5,15  | 0,01060 | NM_183239       | ---       |
| 8072584 | 0,18 | 1,13 | 0,63126 | 1,22  | 2,33  | 0,01324 | ---             | CCDC112   |
| 8113602 | 0,18 | 1,13 | 0,30903 | 0,45  | 1,37  | 0,07345 | NM_152549       | MEN1      |
| 7949206 | 0,18 | 1,13 | 0,55604 | 1,87  | 3,64  | 0,00357 | NM_130802       | QSOX2     |
| 8165094 | 0,18 | 1,13 | 0,20878 | 2,15  | 4,45  | 0,00588 | NM_181701       | XRRA1     |
| 7950447 | 0,18 | 1,13 | 0,25979 | 0,38  | 1,30  | 0,31709 | NM_182969       | ---       |
| 8151308 | 0,18 | 1,13 | 0,79034 | 0,56  | 1,47  | 0,12560 | ---             | PEF1      |
| 7914354 | 0,18 | 1,13 | 0,76418 | 0,31  | 1,24  | 0,52622 | NM_012392       | WDR53     |
| 8093141 | 0,18 | 1,13 | 0,66559 | 1,96  | 3,88  | 0,00001 | NM_182627       | VAMP5     |
| 8043203 | 0,17 | 1,13 | 0,83658 | -1,40 | -2,63 | 0,13050 | NM_006634       | DNAJB14   |
| 8101934 | 0,17 | 1,13 | 0,78251 | 0,27  | 1,21  | 0,65134 | NM_001031723    | FAM82A2   |
| 7987536 | 0,17 | 1,13 | 0,40326 | 1,87  | 3,64  | 0,00523 | NM_018145       | FAM53B    |
| 7936884 | 0,17 | 1,13 | 0,66340 | 0,39  | 1,31  | 0,41031 | NM_014661       | SMAD9     |
| 7971015 | 0,17 | 1,13 | 0,48881 | -0,15 | -1,11 | 0,75009 | NM_001127217    | NDUFB2    |
| 8136602 | 0,17 | 1,13 | 0,49696 | 0,51  | 1,43  | 0,08985 | NM_004546       | LGALS9    |
| 8005809 | 0,17 | 1,13 | 0,64619 | -0,46 | -1,38 | 0,08142 | NM_009587       | CNKSR3    |
| 8130422 | 0,17 | 1,13 | 0,57588 | 2,50  | 5,66  | 0,00022 | NM_173515       | LHPP      |
| 7931204 | 0,17 | 1,13 | 0,42924 | 1,84  | 3,58  | 0,00142 | NM_022126       | ARHGDI2   |
| 8019765 | 0,17 | 1,13 | 0,78329 | 2,24  | 4,73  | 0,03033 | NM_004309       | SH3BP5L   |
| 7925763 | 0,17 | 1,13 | 0,44353 | 0,15  | 1,11  | 0,78320 | NM_030645       | ZZEF1     |
| 8011542 | 0,17 | 1,13 | 0,33313 | 2,15  | 4,45  | 0,00200 | NM_015113       | RNMTL1    |
| 8003621 | 0,17 | 1,13 | 0,73367 | 1,21  | 2,32  | 0,01592 | NM_018146       | ---       |
| 8139031 | 0,17 | 1,13 | 0,70185 | -1,84 | -3,59 | 0,00035 | ---             | ARSG      |
| 8009443 | 0,17 | 1,13 | 0,27970 | 0,93  | 1,91  | 0,01248 | NM_014960       | NDUFS7    |
| 8032212 | 0,17 | 1,13 | 0,68304 | -0,31 | -1,24 | 0,37030 | AK127759 ACYP1  |           |
| 7980265 | 0,17 | 1,12 | 0,45008 | 1,31  | 2,47  | 0,01599 | NM_203488       | FAM72D    |
| 7904452 | 0,17 | 1,12 | 0,61878 | 2,70  | 6,49  | 0,00612 | AB096683        | ---       |
| 8081217 | 0,17 | 1,12 | 0,56899 | 0,23  | 1,17  | 0,22946 | ---             | APBB3     |
| 8114593 | 0,17 | 1,12 | 0,58819 | 2,51  | 5,70  | 0,00443 | NM_133174       | PPM1G     |
| 8051119 | 0,17 | 1,12 | 0,70983 | 2,03  | 4,09  | 0,00191 | NM_177983       | BMS1P1    |
| 7933413 | 0,17 | 1,12 | 0,55607 | 1,53  | 2,89  | 0,00038 | NR_026566       | C9orf6    |
| 8157144 | 0,17 | 1,12 | 0,75975 | 3,10  | 8,58  | 0,00163 | NM_017832       | ACOT8     |
| 8066598 | 0,17 | 1,12 | 0,50792 | 0,49  | 1,40  | 0,14917 | NM_005469       | FLJ16423  |
| 8170400 | 0,17 | 1,12 | 0,44727 | 0,85  | 1,81  | 0,01931 | ENST00000432041 | RPS2      |
| 7998655 | 0,17 | 1,12 | 0,77718 | 1,70  | 3,26  | 0,04245 | NM_002952       | LIX1L     |
| 7904742 | 0,17 | 1,12 | 0,72604 | 2,55  | 5,87  | 0,00423 | NM_153713       | FAM43A    |
| 8084891 | 0,17 | 1,12 | 0,40874 | 0,25  | 1,19  | 0,28605 | NM_153690       | ---       |
| 7951589 | 0,17 | 1,12 | 0,74988 | 0,01  | 1,01  | 0,98592 | ---             | DCHS1     |
| 7946245 | 0,17 | 1,12 | 0,81535 | -1,49 | -2,81 | 0,00846 | NM_003737       | CLK4      |

|         |      |      |         |       |       |         |                 |          |
|---------|------|------|---------|-------|-------|---------|-----------------|----------|
| 8116227 | 0,17 | 1,12 | 0,45271 | 0,38  | 1,30  | 0,19897 | NM_020666       | ABHD14B  |
| 8087825 | 0,17 | 1,12 | 0,29567 | 0,37  | 1,29  | 0,20368 | NM_032750       | TEAD2    |
| 8038347 | 0,17 | 1,12 | 0,62406 | 1,33  | 2,51  | 0,00208 | NM_003598       | CTBP1    |
| 8098880 | 0,17 | 1,12 | 0,39896 | 1,37  | 2,58  | 0,02061 | NM_001012614    | RARA     |
| 8007084 | 0,17 | 1,12 | 0,70288 | -0,26 | -1,20 | 0,37681 | NM_000964       | BLVRA    |
| 8132515 | 0,17 | 1,12 | 0,73495 | 0,81  | 1,75  | 0,08974 | NM_000712       | CCDC113  |
| 7996198 | 0,17 | 1,12 | 0,24161 | 1,18  | 2,27  | 0,03360 | NM_014157       | TOMM40L  |
| 7906728 | 0,17 | 1,12 | 0,21695 | -0,02 | -1,01 | 0,96466 | NM_032174       | INADL    |
| 7901804 | 0,17 | 1,12 | 0,65623 | 3,31  | 9,89  | 0,00001 | NM_176877       | ---      |
| 8161693 | 0,16 | 1,12 | 0,44275 | -0,75 | -1,68 | 0,08838 | ---             | PARP3    |
| 8080144 | 0,16 | 1,12 | 0,70322 | 2,19  | 4,55  | 0,00246 | NM_001003931    | KTELC1   |
| 8081853 | 0,16 | 1,12 | 0,72590 | 2,20  | 4,59  | 0,00167 | NR_024265       | ACAP3    |
| 7911458 | 0,16 | 1,12 | 0,61899 | 0,06  | 1,04  | 0,79383 | NM_030649       | TMEM178  |
| 8041570 | 0,16 | 1,12 | 0,69907 | -0,71 | -1,64 | 0,07533 | NM_152390       | ANP32C   |
| 8103518 | 0,16 | 1,12 | 0,58298 | 0,17  | 1,12  | 0,50680 | NM_012403       | GPR115   |
| 8120135 | 0,16 | 1,12 | 0,12217 | -0,39 | -1,31 | 0,04672 | NM_153838       | OSBPL5   |
| 7945831 | 0,16 | 1,12 | 0,60261 | 0,61  | 1,53  | 0,13981 | NM_020896       | INF2     |
| 7977249 | 0,16 | 1,12 | 0,70676 | 0,82  | 1,77  | 0,29944 | NM_022489       | ZNF331   |
| 8030999 | 0,16 | 1,12 | 0,64787 | 0,49  | 1,40  | 0,01370 | NM_018555       | ABHD3    |
| 8022488 | 0,16 | 1,12 | 0,52175 | 2,82  | 7,07  | 0,00180 | NM_138340       | ATRX     |
| 8176276 | 0,16 | 1,12 | 0,92918 | 1,83  | 3,55  | 0,11281 | NM_000489       | ENSA     |
| 7919763 | 0,16 | 1,12 | 0,47130 | 1,48  | 2,80  | 0,01005 | NM_207042       | IFI27L2  |
| 7981046 | 0,16 | 1,12 | 0,62883 | 0,27  | 1,21  | 0,54699 | NM_032036       | TUFM     |
| 8000603 | 0,16 | 1,12 | 0,74928 | 1,93  | 3,82  | 0,01704 | NM_003321       | IGFBP3   |
| 8138566 | 0,16 | 1,12 | 0,81343 | 1,61  | 3,04  | 0,01913 | NM_006547       | MORF4    |
| 8103753 | 0,16 | 1,12 | 0,59591 | -0,76 | -1,69 | 0,02674 | NM_006792       | CRELD1   |
| 8077712 | 0,16 | 1,12 | 0,43495 | 0,90  | 1,86  | 0,00146 | NM_001031717    | MAD2L1   |
| 8102560 | 0,16 | 1,12 | 0,56256 | 1,70  | 3,25  | 0,00511 | NM_002358       | ---      |
| 7942912 | 0,16 | 1,12 | 0,82753 | -2,13 | -4,38 | 0,03685 | ---             | RBAK     |
| 8131292 | 0,16 | 1,12 | 0,63227 | 1,34  | 2,54  | 0,00819 | NM_021163       | FEM1B    |
| 7984470 | 0,16 | 1,12 | 0,60697 | 1,57  | 2,97  | 0,01512 | NM_015322       | SMARCA4  |
| 8025788 | 0,16 | 1,12 | 0,59820 | -0,86 | -1,82 | 0,01674 | NM_001128849    | MAGT1    |
| 8168466 | 0,16 | 1,12 | 0,66921 | -0,44 | -1,36 | 0,01731 | NM_032121       | COTL1    |
| 8003171 | 0,16 | 1,12 | 0,86166 | 0,48  | 1,39  | 0,40009 | NM_021149       | CTDSP1   |
| 8048304 | 0,16 | 1,12 | 0,37079 | 0,80  | 1,75  | 0,16642 | NM_021198       | ANAPC10  |
| 8103005 | 0,16 | 1,12 | 0,60259 | 1,08  | 2,12  | 0,05803 | NM_014885       | VARS     |
| 8125091 | 0,16 | 1,12 | 0,54278 | 2,00  | 4,00  | 0,00491 | NM_006295       | VARS     |
| 8178609 | 0,16 | 1,12 | 0,54278 | 2,00  | 4,00  | 0,00491 | NM_006295       | XIAP     |
| 8169742 | 0,16 | 1,12 | 0,48113 | 0,52  | 1,44  | 0,17822 | NM_001167       | ZNF502   |
| 8079224 | 0,16 | 1,12 | 0,57053 | 0,69  | 1,61  | 0,07700 | NM_033210       | ZNF197   |
| 8079204 | 0,16 | 1,12 | 0,21412 | 0,25  | 1,19  | 0,38205 | NM_006991       | SUV39H2  |
| 7926319 | 0,16 | 1,12 | 0,70233 | 1,01  | 2,02  | 0,01344 | NM_024670       | LRRC37A4 |
| 8017840 | 0,16 | 1,12 | 0,36091 | 0,73  | 1,66  | 0,06828 | ENST00000443126 | ZFP112   |
| 8037453 | 0,16 | 1,12 | 0,23921 | -0,38 | -1,30 | 0,02682 | NM_001083335    | CYP51A1  |
| 8140864 | 0,16 | 1,12 | 0,52404 | 0,74  | 1,67  | 0,53908 | NM_000786       | STAT5A   |
| 8007212 | 0,16 | 1,12 | 0,63970 | -0,12 | -1,09 | 0,45589 | NM_003152       | TMEM128  |
| 8099099 | 0,16 | 1,12 | 0,61690 | 0,97  | 1,96  | 0,01788 | NM_032927       | HJURP    |
| 8059838 | 0,16 | 1,12 | 0,23168 | 0,82  | 1,77  | 0,03048 | NM_018410       | TMEM182  |
| 8044094 | 0,16 | 1,12 | 0,61271 | 1,53  | 2,90  | 0,01140 | NM_144632       | PFKFB4   |
| 8086961 | 0,16 | 1,12 | 0,58922 | 0,61  | 1,53  | 0,25644 | NM_004567       | IQCH     |
| 7984380 | 0,16 | 1,12 | 0,65536 | 0,12  | 1,08  | 0,69830 | NM_001031715    | ZSCAN29  |
| 7988082 | 0,16 | 1,11 | 0,65859 | 1,23  | 2,34  | 0,00269 | NM_152455       | CPS1     |
| 8048026 | 0,16 | 1,11 | 0,80149 | -0,93 | -1,90 | 0,03023 | NM_001875       | PHF15    |
| 8108080 | 0,16 | 1,11 | 0,50654 | 0,71  | 1,64  | 0,09914 | NM_015288       | YARS2    |
| 7962203 | 0,16 | 1,11 | 0,66589 | 0,58  | 1,49  | 0,17118 | NM_001040436    | LMCD1    |
| 8077490 | 0,16 | 1,11 | 0,48019 | -0,21 | -1,16 | 0,53765 | NM_014583       | SSTR5    |
| 7992145 | 0,16 | 1,11 | 0,67483 | -0,17 | -1,13 | 0,59280 | NM_001053       | POMGNT1  |
| 7915801 | 0,16 | 1,11 | 0,73252 | 1,42  | 2,68  | 0,04581 | NM_017739       | ---      |
| 8176427 | 0,16 | 1,11 | 0,60914 | -0,39 | -1,31 | 0,32259 | ---             | ---      |
| 8177114 | 0,16 | 1,11 | 0,60914 | -0,39 | -1,31 | 0,32259 | ---             | ZNF311   |
| 8124622 | 0,16 | 1,11 | 0,59719 | 0,73  | 1,66  | 0,21465 | NM_001010877    | ZNF311   |
| 8178275 | 0,16 | 1,11 | 0,59719 | 0,73  | 1,66  | 0,21465 | NM_001010877    | ESRRG    |
| 7924309 | 0,15 | 1,11 | 0,61644 | -1,14 | -2,20 | 0,00450 | NM_206594       | MYEF2    |
| 7988444 | 0,15 | 1,11 | 0,59046 | 2,44  | 5,42  | 0,00464 | NM_016132       | EGR2     |
| 7933872 | 0,15 | 1,11 | 0,75288 | 0,04  | 1,03  | 0,66606 | NM_000399       | CYGB     |
| 8018754 | 0,15 | 1,11 | 0,70708 | -1,22 | -2,32 | 0,04929 | NM_134268       | C22orf25 |
| 8071301 | 0,15 | 1,11 | 0,65999 | 2,09  | 4,25  | 0,00359 | NM_152906       | ASB6     |
| 8164572 | 0,15 | 1,11 | 0,64715 | 1,94  | 3,84  | 0,00999 | NM_017873       | ---      |
| 8107094 | 0,15 | 1,11 | 0,60281 | 0,43  | 1,35  | 0,45439 | ---             | ---      |
| 7988342 | 0,15 | 1,11 | 0,74020 | 0,10  | 1,07  | 0,85688 | ---             | CEP97    |
| 8081362 | 0,15 | 1,11 | 0,42006 | 2,15  | 4,42  | 0,00109 | NM_024548       | STK25    |
| 8060257 | 0,15 | 1,11 | 0,71187 | 1,81  | 3,50  | 0,00650 | NM_006374       | PDLIM4   |
| 8107897 | 0,15 | 1,11 | 0,64215 | -1,12 | -2,18 | 0,07957 | NM_003687       | SUMO4    |

|         |      |      |         |       |       |         |                        |                  |
|---------|------|------|---------|-------|-------|---------|------------------------|------------------|
| 8122684 | 0,15 | 1,11 | 0,36237 | 0,32  | 1,25  | 0,36984 | NM_001002255           | RCC2             |
| 7912956 | 0,15 | 1,11 | 0,53341 | 0,73  | 1,66  | 0,23722 | NM_001136204           | SERGEF           |
| 7946933 | 0,15 | 1,11 | 0,69735 | 0,62  | 1,53  | 0,18845 | NM_012139              | GTPBP4           |
| 7925823 | 0,15 | 1,11 | 0,51215 | 1,89  | 3,70  | 0,00003 | NM_012341              | WDR20            |
| 7976957 | 0,15 | 1,11 | 0,73645 | 0,69  | 1,62  | 0,08891 | NM_181291              | LACE1            |
| 8121349 | 0,15 | 1,11 | 0,33375 | 1,21  | 2,32  | 0,00599 | NM_145315              | PLD5             |
| 7925511 | 0,15 | 1,11 | 0,58026 | -0,78 | -1,71 | 0,01338 | NM_152666              | DPY19L2P2        |
| 8141882 | 0,15 | 1,11 | 0,75328 | 0,66  | 1,58  | 0,09962 | NR_027768              | MRP63            |
| 7967987 | 0,15 | 1,11 | 0,55766 | 0,46  | 1,38  | 0,08479 | NM_024026              | KBTD6            |
| 7971208 | 0,15 | 1,11 | 0,60345 | 1,48  | 2,79  | 0,00788 | NM_152903              | CCDC82           |
| 7951144 | 0,15 | 1,11 | 0,71068 | 0,97  | 1,96  | 0,06095 | NM_024725              | PODNL1           |
| 8034712 | 0,15 | 1,11 | 0,73051 | -1,69 | -3,24 | 0,01603 | NM_024825              | MMACHC           |
| 7901102 | 0,15 | 1,11 | 0,56955 | 1,58  | 3,00  | 0,00197 | NM_015506              | STAR10           |
| 7950235 | 0,15 | 1,11 | 0,76377 | 0,39  | 1,31  | 0,36207 | NM_006645              | PDIA6            |
| 8040249 | 0,15 | 1,11 | 0,70630 | -0,22 | -1,17 | 0,65149 | NM_005742              | ---              |
| 8151987 | 0,15 | 1,11 | 0,77590 | -1,68 | -3,20 | 0,00375 | ---                    | PINX1            |
| 8149296 | 0,15 | 1,11 | 0,41513 | 0,68  | 1,60  | 0,02128 | NM_017884              | LOC729566        |
| 8097780 | 0,15 | 1,11 | 0,41577 | -0,44 | -1,36 | 0,08799 | ENST00000342688        | RNF40            |
| 7994939 | 0,15 | 1,11 | 0,52524 | 1,95  | 3,88  | 0,03960 | NM_014771              | MSL3             |
| 8166015 | 0,15 | 1,11 | 0,81346 | 0,19  | 1,14  | 0,58169 | NM_006800              | TGM5             |
| 7988050 | 0,15 | 1,11 | 0,81185 | -0,83 | -1,77 | 0,00077 | NM_201631              | EVC              |
| 8093878 | 0,15 | 1,11 | 0,64293 | 0,48  | 1,40  | 0,27125 | NM_153717              | HIST2H2AB        |
| 7919642 | 0,15 | 1,11 | 0,74073 | 2,21  | 4,64  | 0,01670 | NM_175065              | DEPDC7           |
| 7939173 | 0,15 | 1,11 | 0,62026 | 0,29  | 1,22  | 0,30773 | NM_001077242           | IFNA2            |
| 8160422 | 0,15 | 1,11 | 0,32826 | -0,63 | -1,55 | 0,00635 | NM_000605              | NAT10            |
| 7939265 | 0,15 | 1,11 | 0,51359 | 1,62  | 3,07  | 0,01036 | NM_024662              | ---              |
| 7902611 | 0,15 | 1,11 | 0,75813 | -1,19 | -2,28 | 0,00658 | ---                    | PHEX             |
| 8166408 | 0,15 | 1,11 | 0,36461 | -0,14 | -1,10 | 0,13086 | NM_000444              | AP4M1            |
| 8134712 | 0,15 | 1,11 | 0,57246 | 0,37  | 1,29  | 0,20394 | NM_004722              | SNORA41          |
| 8047780 | 0,15 | 1,11 | 0,29742 | -0,51 | -1,43 | 0,10822 | NR_002590              | CENPJ            |
| 7970624 | 0,15 | 1,11 | 0,43216 | 2,21  | 4,63  | 0,03547 | NM_018451              | TMEM168          |
| 8142407 | 0,14 | 1,11 | 0,65653 | 0,93  | 1,91  | 0,03364 | NM_022484              | SLC25A15         |
| 7968734 | 0,14 | 1,11 | 0,80033 | 1,62  | 3,07  | 0,00619 | NM_014252              | TTC30B           |
| 8056995 | 0,14 | 1,11 | 0,92250 | 0,34  | 1,26  | 0,23352 | NM_152517              | ZC4H2            |
| 8173261 | 0,14 | 1,10 | 0,70782 | -0,67 | -1,59 | 0,09655 | NM_001178032           | DAZAP1           |
| 8024282 | 0,14 | 1,10 | 0,75342 | 1,14  | 2,21  | 0,00598 | NM_170711              | TRAPPC2          |
| 8171352 | 0,14 | 1,10 | 0,68926 | -0,01 | -1,01 | 0,95201 | NM_001011658           | MMAB             |
| 7966213 | 0,14 | 1,10 | 0,61460 | 1,98  | 3,94  | 0,00409 | NM_052845              | FAM133B          |
| 8140942 | 0,14 | 1,10 | 0,69418 | 0,54  | 1,45  | 0,04186 | NM_001040057           | ---              |
| 8103725 | 0,14 | 1,10 | 0,67293 | -1,18 | -2,27 | 0,04002 | ---                    | IQGAP2           |
| 8106354 | 0,14 | 1,10 | 0,64580 | 1,30  | 2,46  | 0,01485 | NM_006633              | CHAC1            |
| 8148467 | 0,14 | 1,10 | 0,77695 | 1,64  | 3,12  | 0,00010 | NM_017444              | AACS             |
| 7959786 | 0,14 | 1,10 | 0,62179 | 2,53  | 5,76  | 0,00057 | NM_023928              | NUDT11           |
| 8172708 | 0,14 | 1,10 | 0,69676 | -0,14 | -1,10 | 0,78938 | NM_018159              | ---              |
| 8141533 | 0,14 | 1,10 | 0,43420 | 0,18  | 1,13  | 0,45991 | ---                    | METTL8           |
| 8056753 | 0,14 | 1,10 | 0,63439 | -0,29 | -1,22 | 0,55398 | NM_024770              | VSIG10           |
| 7966839 | 0,14 | 1,10 | 0,72928 | 1,30  | 2,46  | 0,02290 | NM_019086              | HAUS4            |
| 7977841 | 0,14 | 1,10 | 0,79586 | 1,77  | 3,42  | 0,00023 | NM_001166269           | TSSC1            |
| 8050060 | 0,14 | 1,10 | 0,74622 | 2,26  | 4,80  | 0,00256 | NM_003310              | TMEM39B          |
| 7899675 | 0,14 | 1,10 | 0,65304 | 1,55  | 2,92  | 0,02368 | NM_018056              | CBX6             |
| 8076176 | 0,14 | 1,10 | 0,73788 | 1,80  | 3,47  | 0,02776 | NM_014292              | ZBTB40           |
| 7898750 | 0,14 | 1,10 | 0,73101 | 2,10  | 4,30  | 0,00070 | NM_001083621           | UBE2Q2           |
| 7985044 | 0,14 | 1,10 | 0,84628 | 1,75  | 3,35  | 0,00325 | NM_173469              | PIGH             |
| 7979725 | 0,14 | 1,10 | 0,77946 | 0,86  | 1,82  | 0,02626 | NM_004569              | XYLB             |
| 8078784 | 0,14 | 1,10 | 0,73703 | 0,54  | 1,45  | 0,03928 | NM_005108              | ---              |
| 7964983 | 0,14 | 1,10 | 0,76030 | -0,41 | -1,33 | 0,29448 | ---                    | IKBBB            |
| 8146171 | 0,14 | 1,10 | 0,61952 | 2,31  | 4,95  | 0,00495 | NM_001556              | ---              |
| 8140356 | 0,14 | 1,10 | 0,70991 | -1,63 | -3,10 | 0,06119 | ---                    | PCBP3            |
| 8069252 | 0,14 | 1,10 | 0,64210 | -0,77 | -1,71 | 0,08453 | NM_020528              | SLC16A1          |
| 7918622 | 0,14 | 1,10 | 0,70622 | 1,77  | 3,41  | 0,00849 | NM_001166496           | BAT5             |
| 8125017 | 0,14 | 1,10 | 0,05706 | 1,83  | 3,56  | 0,01253 | NM_021160              | ---              |
| 7938258 | 0,14 | 1,10 | 0,77978 | -0,87 | -1,83 | 0,06794 | ---                    | C4orf52          |
| 8094456 | 0,14 | 1,10 | 0,79474 | 1,76  | 3,38  | 0,00056 | NM_001145432           | TXLNB            |
| 8129924 | 0,14 | 1,10 | 0,76128 | -0,59 | -1,51 | 0,02465 | NM_153235              | SOX6             |
| 7946757 | 0,14 | 1,10 | 0,73774 | -0,46 | -1,37 | 0,30967 | NM_017508              | FOXP1            |
| 8131253 | 0,14 | 1,10 | 0,75722 | 2,24  | 4,72  | 0,00027 | NM_001037165           | FAM107A          |
| 8088415 | 0,14 | 1,10 | 0,76018 | -1,41 | -2,66 | 0,03768 | NM_007177              | SNORD36C         |
| 8158998 | 0,14 | 1,10 | 0,82359 | 0,33  | 1,26  | 0,63106 | NR_000016              | IKZF4            |
| 7956105 | 0,14 | 1,10 | 0,78462 | 0,41  | 1,33  | 0,21842 | NM_022465              | LOC645332        |
| 7949898 | 0,14 | 1,10 | 0,85690 | 1,35  | 2,55  | 0,02532 | NR_024249              | TRIM49 // TRIM49 |
| 7939884 | 0,13 | 1,10 | 0,84833 | -1,99 | -3,97 | 0,00047 | NM_020358 // NM_020358 | SYNGR2           |
| 8010243 | 0,13 | 1,10 | 0,77051 | 3,15  | 8,86  | 0,00446 | NM_004710              | ZNF510           |
| 8162631 | 0,13 | 1,10 | 0,80111 | 1,35  | 2,55  | 0,00203 | NM_014930              | MTMR3            |

|                                                                   |      |      |         |       |       |         |                                     |                    |       |
|-------------------------------------------------------------------|------|------|---------|-------|-------|---------|-------------------------------------|--------------------|-------|
| 8072302                                                           | 0,13 | 1,10 | 0,69632 | 1,57  | 2,97  | 0,01148 | NM_153050                           | SLC6A9             |       |
| 7915543                                                           | 0,13 | 1,10 | 0,64592 | 2,34  | 5,05  | 0,00189 | NM_201649                           | ---                |       |
| 8152092                                                           | 0,13 | 1,10 | 0,75526 | -0,36 | -1,28 | 0,45130 | ---                                 | SAPS2              |       |
| 8074030                                                           | 0,13 | 1,10 | 0,62527 | 1,42  | 2,68  | 0,00886 | NM_014678                           | ZP3                |       |
| 8133728                                                           | 0,13 | 1,10 | 0,79087 | 2,59  | 6,02  | 0,00127 | NM_001110354                        | FKBP9L             |       |
| 8139723                                                           | 0,13 | 1,10 | 0,79070 | -0,75 | -1,68 | 0,01062 | NR_027342                           | ARHGEF17           |       |
| 7942417                                                           | 0,13 | 1,10 | 0,66442 | 1,68  | 3,19  | 0,00836 | NM_014786                           | SNORD43            |       |
| 8076223                                                           | 0,13 | 1,10 | 0,80861 | -0,17 | -1,12 | 0,09771 | NR_002439                           | NAT1               |       |
| 8144857                                                           | 0,13 | 1,10 | 0,64879 | -0,06 | -1,04 | 0,66497 | NM_001160170                        | CCDC138            |       |
| 8044278                                                           | 0,13 | 1,10 | 0,71888 | 1,35  | 2,55  | 0,05482 | NM_144978                           | OTUD3              |       |
| 7898602                                                           | 0,13 | 1,10 | 0,42659 | 0,89  | 1,85  | 0,04595 | NM_015207                           | RGAG4              |       |
| 8173503                                                           | 0,13 | 1,10 | 0,85297 | -1,20 | -2,30 | 0,02706 | NM_001024455                        | ---                |       |
| 8052667                                                           | 0,13 | 1,10 | 0,56489 | -0,14 | -1,10 | 0,63183 | ---                                 | FAM74A3            |       |
| 8155388                                                           | 0,13 | 1,10 | 0,81400 | -1,42 | -2,67 | 0,00076 | ENST00000377629                     | RHBDF1             |       |
| 7998136                                                           | 0,13 | 1,10 | 0,73880 | 0,48  | 1,40  | 0,10196 | NM_022450                           | C4orf29            |       |
| 8097373                                                           | 0,13 | 1,10 | 0,76497 | 2,54  | 5,80  | 0,00077 | BC034253 REXO4                      |                    |       |
| 8164907                                                           | 0,13 | 1,10 | 0,29540 | 1,02  | 2,03  | 0,01819 | NM_020385                           | FDXACB1            |       |
| 7951654                                                           | 0,13 | 1,10 | 0,80640 | 0,32  | 1,25  | 0,18933 | NM_138378                           | C10orf11           |       |
| 7928534                                                           | 0,13 | 1,10 | 0,70164 | 1,17  | 2,25  | 0,01046 | NM_032024                           | RNPEPL1            |       |
| 8049689                                                           | 0,13 | 1,09 | 0,34484 | 1,44  | 2,72  | 0,03422 | NM_018226                           | ZNF479             |       |
| 8133023                                                           | 0,13 | 1,09 | 0,73917 | -0,78 | -1,71 | 0,01313 | NM_033273                           | P2RX5              |       |
| 8011415                                                           | 0,13 | 1,09 | 0,74629 | 3,08  | 8,46  | 0,00114 | NM_002561                           | ST8SIA1            |       |
| 7961757                                                           | 0,13 | 1,09 | 0,79948 | -0,96 | -1,95 | 0,19547 | NM_003034                           | MGAT4A             |       |
| 8054135                                                           | 0,13 | 1,09 | 0,68331 | 2,88  | 7,37  | 0,00061 | NM_012214                           | IKZF5              |       |
| 7936826                                                           | 0,13 | 1,09 | 0,72528 | 2,36  | 5,12  | 0,00002 | NM_022466                           | PDCD11             |       |
| 7930226                                                           | 0,13 | 1,09 | 0,70625 | 2,92  | 7,56  | 0,00029 | NM_014976                           | EPHA10             |       |
| 7915056                                                           | 0,13 | 1,09 | 0,33646 | -0,17 | -1,13 | 0,36256 | NM_001099439                        | UBXN1              |       |
| 7948782                                                           | 0,13 | 1,09 | 0,31088 | 0,87  | 1,83  | 0,16080 | NM_015853                           | MTERFD2            |       |
| 8060196                                                           | 0,13 | 1,09 | 0,75425 | 0,35  | 1,27  | 0,20375 | NR_028049                           | ---                |       |
| 8058458                                                           | 0,13 | 1,09 | 0,93352 | 0,55  | 1,46  | 0,34417 | ---                                 | PRKY               |       |
| 8176460                                                           | 0,13 | 1,09 | 0,76064 | 0,17  | 1,13  | 0,16027 | NR_028062                           | SMG1               |       |
| 7993999                                                           | 0,13 | 1,09 | 0,55228 | 1,57  | 2,98  | 0,00337 | NM_015092                           | SMG1               |       |
| 8000222                                                           | 0,13 | 1,09 | 0,55228 | 1,57  | 2,98  | 0,00337 | NM_015092                           | HDX                |       |
| 8173848                                                           | 0,13 | 1,09 | 0,34779 | -0,54 | -1,45 | 0,32810 | NM_001177479                        | WIF1               |       |
| 7964722                                                           | 0,13 | 1,09 | 0,82529 | 1,17  | 2,25  | 0,00573 | NM_007191                           | GABRE              |       |
| 8175666                                                           | 0,13 | 1,09 | 0,66812 | -1,13 | -2,18 | 0,01273 | NM_004961                           | TOM1L2             |       |
| 8013157                                                           | 0,13 | 1,09 | 0,62538 | -0,37 | -1,29 | 0,40230 | NM_001033551                        | FDP2L2A // FDP2L2A |       |
| // FDP2L2A // FDP2L2A // FDP2L2A // FDP2L2A // FDP2L2A // FDP2L2A |      |      |         |       |       |         |                                     |                    |       |
| 8140420                                                           | 0,13 | 1,09 | 0,39597 | 0,25  | 1,19  | 0,30604 | NR_003262 // NR_003262 // NR_003262 |                    |       |
| // NR_003262 // NR_003262 // NR_003262 // NR_003262 // NR_003262  |      |      |         |       |       |         |                                     |                    |       |
| 8104014                                                           | 0,13 | 1,09 | 0,69684 | -1,14 | -2,20 | 0,01274 | CCDC110                             | NM_152775          | WDR83 |
| 8026013                                                           | 0,13 | 1,09 | 0,75799 | 0,06  | 1,04  | 0,77128 | NR_029375                           | CACNB4             |       |
| 8055872                                                           | 0,13 | 1,09 | 0,78105 | -1,34 | -2,53 | 0,00054 | NM_000726                           | CHN2               |       |
| 8132013                                                           | 0,13 | 1,09 | 0,77901 | 0,53  | 1,44  | 0,52708 | NM_004067                           | STX4               |       |
| 7995017                                                           | 0,12 | 1,09 | 0,76222 | 1,03  | 2,04  | 0,00193 | NM_004604                           | DOM3Z              |       |
| 8125220                                                           | 0,12 | 1,09 | 0,74395 | -0,47 | -1,38 | 0,16330 | NM_005510                           | DOM3Z              |       |
| 8178699                                                           | 0,12 | 1,09 | 0,74395 | -0,47 | -1,38 | 0,16330 | NM_005510                           | UTP14A             |       |
| 8169868                                                           | 0,12 | 1,09 | 0,61762 | -0,02 | -1,01 | 0,95105 | NM_006649                           | TRIM59             |       |
| 8091757                                                           | 0,12 | 1,09 | 0,75772 | 2,17  | 4,49  | 0,00263 | NM_173084                           | PTCH1              |       |
| 8162533                                                           | 0,12 | 1,09 | 0,71002 | 1,77  | 3,41  | 0,02111 | NM_001083603                        | LOC100128830       |       |
| 7937104                                                           | 0,12 | 1,09 | 0,84066 | 0,33  | 1,26  | 0,31308 | AK097584 LOC100129118               |                    |       |
| 8026381                                                           | 0,12 | 1,09 | 0,55930 | -0,58 | -1,50 | 0,32645 | XM_001713875                        | C10orf58           |       |
| 7928695                                                           | 0,12 | 1,09 | 0,82237 | 0,99  | 1,98  | 0,01930 | NM_032333                           | KIAA1217           |       |
| 7926679                                                           | 0,12 | 1,09 | 0,61621 | 0,20  | 1,15  | 0,43376 | NM_019590                           | LASS4              |       |
| 8025382                                                           | 0,12 | 1,09 | 0,73554 | 0,70  | 1,63  | 0,31125 | NM_024552                           | C3orf14            |       |
| 8080847                                                           | 0,12 | 1,09 | 0,67895 | 1,30  | 2,46  | 0,00719 | AF236158 LRRFP1                     |                    |       |
| 8049540                                                           | 0,12 | 1,09 | 0,81226 | 0,54  | 1,46  | 0,03177 | NM_001137550                        | PTPRS              |       |
| 8032926                                                           | 0,12 | 1,09 | 0,72711 | 3,00  | 7,99  | 0,00401 | NM_002850                           | RAB31L1            |       |
| 7948643                                                           | 0,12 | 1,09 | 0,82104 | 0,15  | 1,11  | 0,65867 | NM_013401                           | FAM98B             |       |
| 7982574                                                           | 0,12 | 1,09 | 0,75713 | -0,22 | -1,17 | 0,51767 | NM_001042429                        | THSD1P1            |       |
| 7971800                                                           | 0,12 | 1,09 | 0,54646 | 0,45  | 1,37  | 0,33910 | NR_002816                           | ---                |       |
| 8010766                                                           | 0,12 | 1,09 | 0,90961 | -1,34 | -2,54 | 0,06510 | ---                                 | ---                |       |
| 8017361                                                           | 0,12 | 1,09 | 0,52176 | 0,01  | 1,01  | 0,96931 | ---                                 | CLMN               |       |
| 7981142                                                           | 0,12 | 1,09 | 0,78900 | 3,07  | 8,42  | 0,00409 | NM_024734                           | C2CD3              |       |
| 7950332                                                           | 0,12 | 1,09 | 0,81836 | 0,61  | 1,52  | 0,03263 | BC035599 FGGY                       |                    |       |
| 7901748                                                           | 0,12 | 1,09 | 0,58962 | -0,22 | -1,16 | 0,19540 | NM_001113411                        | UNC5C              |       |
| 8101788                                                           | 0,12 | 1,09 | 0,75373 | -1,42 | -2,67 | 0,00010 | NM_003728                           | EFHD2              |       |
| 7898161                                                           | 0,12 | 1,09 | 0,56897 | 2,31  | 4,95  | 0,02171 | NM_024329                           | SCLT1              |       |
| 8102751                                                           | 0,12 | 1,09 | 0,76951 | 1,06  | 2,09  | 0,00699 | NM_144643                           | SULT1C4            |       |
| 8044225                                                           | 0,12 | 1,09 | 0,84458 | -1,34 | -2,54 | 0,01261 | NM_006588                           | COQ10A             |       |
| 7956242                                                           | 0,12 | 1,09 | 0,80480 | 3,63  | 12,42 | 0,00054 | NM_144576                           | LETM2              |       |
| 8145942                                                           | 0,12 | 1,09 | 0,64274 | 0,95  | 1,93  | 0,00229 | NM_144652                           | RMND1              |       |
| 8130191                                                           | 0,12 | 1,09 | 0,70810 | 0,50  | 1,41  | 0,03157 | NM_017909                           | WDFY2              |       |

|         |      |      |         |       |       |         |                   |              |
|---------|------|------|---------|-------|-------|---------|-------------------|--------------|
| 7969204 | 0,12 | 1,09 | 0,83327 | 1,41  | 2,67  | 0,00051 | NM_052950         | NME7         |
| 7922137 | 0,12 | 1,09 | 0,63523 | 1,27  | 2,42  | 0,00386 | NM_013330         | RHOG         |
| 7945944 | 0,12 | 1,09 | 0,76940 | 0,28  | 1,21  | 0,11884 | NM_001665         | MAD2L2       |
| 7912481 | 0,12 | 1,09 | 0,68915 | 1,45  | 2,72  | 0,00366 | NM_001127325      | ---          |
| 8139158 | 0,12 | 1,09 | 0,70518 | -1,60 | -3,04 | 0,10305 | --- EPST11        | ---          |
| 7971296 | 0,12 | 1,09 | 0,60678 | -0,55 | -1,46 | 0,01394 | NM_001002264      | SNORA44      |
| 7914214 | 0,12 | 1,09 | 0,62347 | 0,02  | 1,02  | 0,96850 | NR_002976         | C4orf7       |
| 8095467 | 0,12 | 1,09 | 0,83893 | -1,06 | -2,09 | 0,00056 | NM_152997         | DUS1L        |
| 8019376 | 0,12 | 1,09 | 0,71724 | 1,26  | 2,39  | 0,00622 | NM_022156         | NUDT12       |
| 8113413 | 0,12 | 1,09 | 0,68595 | 0,73  | 1,66  | 0,08305 | NM_031438         | TRIM52       |
| 8110666 | 0,12 | 1,09 | 0,78682 | 1,45  | 2,73  | 0,00251 | NM_032765         | C9orf91      |
| 8157463 | 0,12 | 1,09 | 0,76388 | 2,89  | 7,39  | 0,00089 | NM_153045         | C15orf51     |
| 7986509 | 0,12 | 1,08 | 0,95607 | -2,03 | -4,07 | 0,00891 | ENST00000423248   | LOC100289668 |
| 7986512 | 0,12 | 1,08 | 0,95607 | -2,03 | -4,07 | 0,00891 | ENST00000426730   | LOC100289668 |
| 7986527 | 0,12 | 1,08 | 0,95607 | -2,03 | -4,07 | 0,00891 | ENST00000426730   | ZNF319       |
| 8001651 | 0,12 | 1,08 | 0,80924 | 1,67  | 3,19  | 0,02473 | NM_020807         | ACBD7        |
| 7932214 | 0,12 | 1,08 | 0,58244 | -0,14 | -1,10 | 0,72476 | NM_001039844      | ZFP28        |
| 8031659 | 0,12 | 1,08 | 0,86271 | 0,68  | 1,61  | 0,06773 | NM_020828         | TNFRSF10C    |
| 8145244 | 0,12 | 1,08 | 0,55375 | -0,17 | -1,12 | 0,27002 | NM_003841         | ZNF503       |
| 7934553 | 0,12 | 1,08 | 0,77042 | 0,55  | 1,46  | 0,28341 | NM_032772         | DBF4         |
| 8133976 | 0,12 | 1,08 | 0,66209 | 0,42  | 1,34  | 0,00176 | NM_006716         | LRRC37A2     |
| 8016259 | 0,12 | 1,08 | 0,71448 | 1,29  | 2,45  | 0,06792 | NM_001006607      | AFG3L2       |
| 8022342 | 0,12 | 1,08 | 0,68620 | 1,82  | 3,52  | 0,00006 | NM_006796         | NAB2         |
| 7956287 | 0,12 | 1,08 | 0,49313 | 0,19  | 1,14  | 0,64522 | NM_005967         | BAT5         |
| 8178561 | 0,12 | 1,08 | 0,23821 | 1,78  | 3,43  | 0,01463 | NM_021160         | IER2         |
| 8026163 | 0,12 | 1,08 | 0,80482 | 0,54  | 1,46  | 0,07301 | NM_004907         | TRA2A        |
| 8138592 | 0,12 | 1,08 | 0,73163 | -0,81 | -1,76 | 0,14855 | AB052759 SLC25A23 | ---          |
| 8033190 | 0,11 | 1,08 | 0,55765 | 2,31  | 4,95  | 0,01133 | NM_024103         | NCKAP5L      |
| 7963134 | 0,11 | 1,08 | 0,65658 | -0,10 | -1,07 | 0,78851 | NM_001037806      | CRTC1        |
| 8027053 | 0,11 | 1,08 | 0,63159 | 0,08  | 1,06  | 0,78970 | NM_001098482      | MPRIP        |
| 8005235 | 0,11 | 1,08 | 0,77808 | -0,68 | -1,60 | 0,48918 | NM_201274         | SNORA59A     |
| 7897953 | 0,11 | 1,08 | 0,74929 | -1,47 | -2,77 | 0,00370 | NR_003025         | SNORA59A     |
| 8005626 | 0,11 | 1,08 | 0,74929 | -1,47 | -2,77 | 0,00370 | NR_003025         | IFIT5        |
| 7929072 | 0,11 | 1,08 | 0,60126 | 0,10  | 1,07  | 0,76031 | NM_012420         | PBRM1        |
| 7967896 | 0,11 | 1,08 | 0,53992 | -0,55 | -1,46 | 0,00681 | ENST00000421695   | CSTF2        |
| 8168762 | 0,11 | 1,08 | 0,29755 | 0,87  | 1,82  | 0,00902 | NM_001325         | ZNF239       |
| 7933180 | 0,11 | 1,08 | 0,77163 | 0,27  | 1,21  | 0,37793 | NM_001099282      | GTDC1        |
| 8055606 | 0,11 | 1,08 | 0,77156 | 1,24  | 2,36  | 0,00024 | NM_001006636      | HIST1H4C     |
| 8117368 | 0,11 | 1,08 | 0,78228 | 3,71  | 13,08 | 0,00004 | NM_003542         | CD248        |
| 7949588 | 0,11 | 1,08 | 0,76367 | -1,20 | -2,30 | 0,06490 | NM_020404         | ---          |
| 7968272 | 0,11 | 1,08 | 0,85117 | -0,13 | -1,09 | 0,72662 | --- TIPIN         | ---          |
| 7989915 | 0,11 | 1,08 | 0,84722 | 1,09  | 2,13  | 0,13368 | NM_017858         | ESCO1        |
| 8022473 | 0,11 | 1,08 | 0,70881 | 1,45  | 2,72  | 0,02646 | NM_052911         | KIF14        |
| 7923189 | 0,11 | 1,08 | 0,77411 | 3,16  | 8,94  | 0,00016 | NM_014875         | ISCA2        |
| 7975705 | 0,11 | 1,08 | 0,73190 | 1,55  | 2,93  | 0,01426 | NM_194279         | FAM72D       |
| 8039928 | 0,11 | 1,08 | 0,76831 | 2,68  | 6,43  | 0,00618 | AB096683 GALK1    | ---          |
| 8018428 | 0,11 | 1,08 | 0,87428 | 0,92  | 1,89  | 0,11418 | NM_000154         | MCOLN2       |
| 7917283 | 0,11 | 1,08 | 0,70252 | 0,71  | 1,64  | 0,02193 | NM_153259         | NASP         |
| 7901123 | 0,11 | 1,08 | 0,53727 | 1,55  | 2,93  | 0,00053 | NM_172164         | FDPS         |
| 7905986 | 0,11 | 1,08 | 0,59743 | 2,85  | 7,19  | 0,00055 | NM_002004         | SNORD6       |
| 7951030 | 0,11 | 1,08 | 0,89284 | 1,01  | 2,01  | 0,11540 | NR_003036         | ZNF10        |
| 7960158 | 0,11 | 1,08 | 0,72549 | 0,49  | 1,40  | 0,09205 | NM_015394         | PPIL1        |
| 8126058 | 0,11 | 1,08 | 0,75264 | 1,16  | 2,23  | 0,09581 | NM_016059         | TPBG         |
| 8120880 | 0,11 | 1,08 | 0,83309 | 1,65  | 3,14  | 0,07648 | NM_006670         | CWF19L2      |
| 7951447 | 0,11 | 1,08 | 0,59575 | -0,29 | -1,22 | 0,00323 | NM_152434         | C6orf150     |
| 8127534 | 0,11 | 1,08 | 0,70946 | 2,92  | 7,59  | 0,00352 | NM_138441         | ZNF568       |
| 8028213 | 0,11 | 1,08 | 0,63146 | -0,12 | -1,08 | 0,62283 | NM_198539         | C2orf64      |
| 8054131 | 0,11 | 1,08 | 0,60565 | 1,13  | 2,19  | 0,00961 | BC047722 CD34     | ---          |
| 7923978 | 0,11 | 1,08 | 0,74960 | -0,97 | -1,95 | 0,03126 | NM_001773         | MIR199A1     |
| 8034099 | 0,11 | 1,08 | 0,62106 | -0,76 | -1,69 | 0,01342 | NR_029586         | UBASH3B      |
| 7944722 | 0,11 | 1,08 | 0,81130 | 1,91  | 3,75  | 0,00129 | NM_032873         | WNT2B        |
| 7904025 | 0,11 | 1,08 | 0,68320 | -0,52 | -1,44 | 0,16459 | NM_024494         | MIR138-1     |
| 8079165 | 0,11 | 1,08 | 0,78940 | -1,24 | -2,37 | 0,00248 | NR_029700         | C6orf115     |
| 8122336 | 0,11 | 1,08 | 0,86579 | 1,68  | 3,20  | 0,01274 | NM_021243         | DAG1         |
| 8079753 | 0,11 | 1,08 | 0,79687 | 1,92  | 3,78  | 0,00698 | NM_001165928      | PRMT6        |
| 7903457 | 0,11 | 1,08 | 0,79434 | -0,52 | -1,43 | 0,07833 | NM_018137         | CREB3L4      |
| 7905677 | 0,11 | 1,08 | 0,66717 | 0,68  | 1,60  | 0,01895 | NM_130898         | ---          |
| 8007990 | 0,11 | 1,08 | 0,90346 | -3,10 | -8,57 | 0,01747 | --- RPL23AP53     | ---          |
| 8148966 | 0,11 | 1,08 | 0,85084 | -0,42 | -1,34 | 0,29852 | NR_003572         | ANKRD5       |
| 8060949 | 0,11 | 1,08 | 0,73018 | 2,27  | 4,82  | 0,00616 | NM_022096         | PDCL         |
| 8163964 | 0,11 | 1,08 | 0,77446 | 1,74  | 3,34  | 0,00036 | NM_005388         | NHS          |
| 8166266 | 0,11 | 1,08 | 0,57573 | -0,23 | -1,18 | 0,56503 | NM_198270         | ZFP2         |
| 8110472 | 0,11 | 1,08 | 0,74412 | -0,16 | -1,11 | 0,69115 | NM_030613         | ZNF208       |



|         |      |      |         |       |       |         |                |           |
|---------|------|------|---------|-------|-------|---------|----------------|-----------|
| 8035819 | 0,11 | 1,08 | 0,68193 | -0,57 | -1,48 | 0,27982 | NM_007153      | DEFB107A  |
| 8144405 | 0,11 | 1,08 | 0,77661 | -0,62 | -1,53 | 0,02140 | NM_001037668   | DEFB107A  |
| 8149230 | 0,11 | 1,08 | 0,77661 | -0,62 | -1,53 | 0,02140 | NM_001037668   | RING1     |
| 8178244 | 0,11 | 1,08 | 0,88390 | 1,10  | 2,15  | 0,02171 | NM_002931      | NFRKB     |
| 7952677 | 0,11 | 1,08 | 0,75176 | 1,78  | 3,44  | 0,00063 | NM_006165      | TMEM176A  |
| 8137264 | 0,11 | 1,08 | 0,68403 | -1,66 | -3,16 | 0,00223 | NM_018487      | ---       |
| 8174193 | 0,11 | 1,08 | 0,91294 | -2,30 | -4,93 | 0,00028 | ---            | E2F7      |
| 7965094 | 0,10 | 1,08 | 0,67382 | 0,55  | 1,46  | 0,01764 | NM_203394      | SNORA40   |
| 7951038 | 0,10 | 1,08 | 0,65364 | 1,11  | 2,16  | 0,03894 | NR_002973      | UPF3B     |
| 8174717 | 0,10 | 1,07 | 0,69579 | 1,35  | 2,54  | 0,01067 | NM_080632      | ZNF256    |
| 8039706 | 0,10 | 1,07 | 0,84629 | 0,18  | 1,13  | 0,67502 | NM_005773      | RABGGTA   |
| 7978239 | 0,10 | 1,07 | 0,84284 | 1,05  | 2,08  | 0,05135 | NM_004581      | SIRT4     |
| 7959148 | 0,10 | 1,07 | 0,75220 | 1,10  | 2,14  | 0,05915 | NM_012240      | ---       |
| 8160317 | 0,10 | 1,07 | 0,81674 | -0,51 | -1,42 | 0,04458 | ---            | ROBLD3    |
| 7906072 | 0,10 | 1,07 | 0,78246 | 1,37  | 2,58  | 0,08272 | NM_014017      | BET1      |
| 8141024 | 0,10 | 1,07 | 0,50800 | 0,72  | 1,65  | 0,17498 | NM_005868      | ---       |
| 8094717 | 0,10 | 1,07 | 0,33288 | -0,43 | -1,35 | 0,04230 | ---            | FGD1      |
| 8173086 | 0,10 | 1,07 | 0,54126 | 0,28  | 1,21  | 0,31852 | NM_004463      | ---       |
| 8106250 | 0,10 | 1,07 | 0,74007 | -1,35 | -2,55 | 0,02849 | ---            | HHAT      |
| 7909510 | 0,10 | 1,07 | 0,69697 | 0,91  | 1,88  | 0,00915 | NM_001170580   | PRR4      |
| 7961252 | 0,10 | 1,07 | 0,76534 | 0,61  | 1,52  | 0,03092 | NM_007244      | DIRC1     |
| 8057615 | 0,10 | 1,07 | 0,91749 | -2,21 | -4,63 | 0,01522 | NM_052952      | GPD1L     |
| 8078386 | 0,10 | 1,07 | 0,79329 | 1,50  | 2,82  | 0,00039 | NM_015141      | ZNF211    |
| 8031792 | 0,10 | 1,07 | 0,63847 | 0,06  | 1,05  | 0,80318 | NM_006385      | HAUS8     |
| 8035236 | 0,10 | 1,07 | 0,65595 | 0,47  | 1,38  | 0,04942 | NM_033417      | HLA-DMB   |
| 8125530 | 0,10 | 1,07 | 0,84708 | 3,67  | 12,70 | 0,00074 | NM_002118      | ZNF442    |
| 8034379 | 0,10 | 1,07 | 0,82739 | -0,11 | -1,08 | 0,69331 | NM_030824      | C1orf97   |
| 7909561 | 0,10 | 1,07 | 0,77670 | 1,08  | 2,11  | 0,04756 | NR_026761      | BRF2      |
| 8150219 | 0,10 | 1,07 | 0,77009 | 0,30  | 1,23  | 0,15419 | NM_018310      | GREB1L    |
| 8020384 | 0,10 | 1,07 | 0,45165 | 1,10  | 2,14  | 0,00681 | NM_001142966   | ZBTB49    |
| 8093829 | 0,10 | 1,07 | 0,77290 | 0,53  | 1,45  | 0,08405 | NM_145291      | PNLIPRP1  |
| 7930790 | 0,10 | 1,07 | 0,79961 | -1,09 | -2,13 | 0,04802 | NM_006229      | HRASLS2   |
| 7948982 | 0,10 | 1,07 | 0,58323 | -0,45 | -1,37 | 0,00524 | NM_017878      | ---       |
| 7917080 | 0,10 | 1,07 | 0,69832 | 1,11  | 2,15  | 0,00854 | ---            | AKAP8     |
| 8035007 | 0,10 | 1,07 | 0,44190 | 1,31  | 2,48  | 0,00952 | NM_005858      | ANK3      |
| 7933772 | 0,10 | 1,07 | 0,64496 | 0,19  | 1,14  | 0,32956 | NM_020987      | SPESP1    |
| 7984488 | 0,10 | 1,07 | 0,80950 | -1,13 | -2,19 | 0,00050 | NM_145658      | ZHX3      |
| 8066279 | 0,10 | 1,07 | 0,79399 | 0,68  | 1,60  | 0,00355 | NM_015035      | ZNF16     |
| 8153930 | 0,10 | 1,07 | 0,83080 | 1,43  | 2,70  | 0,00339 | NM_001029976   | PDPK1     |
| 7992670 | 0,10 | 1,07 | 0,88115 | 0,99  | 1,98  | 0,05988 | NM_002613      | NAA38     |
| 8135688 | 0,10 | 1,07 | 0,69958 | -0,01 | -1,01 | 0,95818 | NM_016200      | LOC644714 |
| 8117079 | 0,10 | 1,07 | 0,80587 | -1,48 | -2,79 | 0,01975 | BC047037 QPCTL |           |
| 8029744 | 0,10 | 1,07 | 0,83129 | 0,70  | 1,63  | 0,09055 | NM_017659      | KCTD1     |
| 8022646 | 0,10 | 1,07 | 0,82933 | 0,73  | 1,66  | 0,10326 | NM_001136205   | UHRF1BP1  |
| 8118833 | 0,10 | 1,07 | 0,77738 | 2,63  | 6,20  | 0,00005 | NM_017754      | VPS26B    |
| 7945275 | 0,10 | 1,07 | 0,69931 | 2,02  | 4,07  | 0,00174 | NM_052875      | PDPK1     |
| 7998820 | 0,10 | 1,07 | 0,90662 | 1,70  | 3,25  | 0,03130 | NM_002613      | ARL6IP6   |
| 8045768 | 0,10 | 1,07 | 0,74969 | 1,92  | 3,79  | 0,02025 | NM_152522      | SPATA5L1  |
| 7983469 | 0,10 | 1,07 | 0,79492 | 1,92  | 3,78  | 0,00172 | NM_024063      | FTHL5     |
| 8126948 | 0,10 | 1,07 | 0,46787 | -0,25 | -1,19 | 0,02578 | J04755 DCXR    |           |
| 8019357 | 0,10 | 1,07 | 0,72610 | 4,22  | 18,63 | 0,00012 | NM_016286      | ---       |
| 8048976 | 0,10 | 1,07 | 0,57440 | -0,87 | -1,83 | 0,07932 | ---            | ---       |
| 8092224 | 0,10 | 1,07 | 0,78189 | 0,01  | 1,00  | 0,98866 | ---            | CPVL      |
| 8138805 | 0,10 | 1,07 | 0,70047 | 0,57  | 1,49  | 0,14765 | NM_019029      | ANKAR     |
| 8047006 | 0,10 | 1,07 | 0,54122 | 0,27  | 1,21  | 0,18258 | NM_144708      | FARP2     |
| 8049847 | 0,10 | 1,07 | 0,76354 | 0,68  | 1,61  | 0,12181 | NM_014808      | PDPK1     |
| 7992682 | 0,10 | 1,07 | 0,91132 | 1,36  | 2,56  | 0,06276 | NM_002613      | RAGE      |
| 7981346 | 0,10 | 1,07 | 0,63496 | 0,75  | 1,68  | 0,00376 | NM_014226      | C4orf21   |
| 8102371 | 0,10 | 1,07 | 0,50390 | 0,44  | 1,36  | 0,14325 | NM_018392      | CDC42     |
| 7898739 | 0,10 | 1,07 | 0,82979 | -0,09 | -1,07 | 0,77569 | NM_044472      | ---       |
| 8146241 | 0,10 | 1,07 | 0,70439 | -0,49 | -1,40 | 0,10641 | ---            | KIF27     |
| 8156160 | 0,10 | 1,07 | 0,95404 | 0,26  | 1,20  | 0,80845 | NM_017576      | ---       |
| 8136179 | 0,10 | 1,07 | 0,87928 | 0,14  | 1,10  | 0,71470 | ---            | HOXA2     |
| 8138718 | 0,10 | 1,07 | 0,90832 | 1,62  | 3,08  | 0,00769 | NM_006735      | ZNF167    |
| 8079189 | 0,10 | 1,07 | 0,86745 | -0,17 | -1,13 | 0,74266 | NM_018651      | SCARNA13  |
| 7981181 | 0,10 | 1,07 | 0,87002 | 0,49  | 1,41  | 0,33111 | NR_003002      | MYEOV2    |
| 8060086 | 0,10 | 1,07 | 0,80404 | 0,34  | 1,27  | 0,05048 | NM_138336      | TMEMP23   |
| 7948836 | 0,10 | 1,07 | 0,74165 | 3,02  | 8,10  | 0,00355 | NM_001080501   | LOC646982 |
| 7971167 | 0,10 | 1,07 | 0,76644 | -1,64 | -3,11 | 0,00049 | NR_024507      | CLSPN     |
| 7914851 | 0,09 | 1,07 | 0,66211 | 0,37  | 1,29  | 0,16226 | NM_022111      | TIMM8A    |
| 8174047 | 0,09 | 1,07 | 0,77976 | 0,65  | 1,56  | 0,40174 | NM_004085      | LAS1L     |
| 8173269 | 0,09 | 1,07 | 0,76203 | 1,29  | 2,44  | 0,00591 | NM_031206      | FGB       |
| 8097910 | 0,09 | 1,07 | 0,62283 | 0,33  | 1,26  | 0,17767 | NM_005141      | DCAF15    |

|         |      |      |         |       |       |         |                 |           |
|---------|------|------|---------|-------|-------|---------|-----------------|-----------|
| 8026250 | 0,09 | 1,07 | 0,75301 | 1,69  | 3,22  | 0,00321 | NM_138353       | MMP13     |
| 7951309 | 0,09 | 1,07 | 0,70944 | 0,04  | 1,03  | 0,84673 | NM_002427       | NRF1      |
| 8136140 | 0,09 | 1,07 | 0,77108 | 0,68  | 1,60  | 0,04088 | NM_005011       | TEX9      |
| 7983828 | 0,09 | 1,07 | 0,37301 | 0,49  | 1,40  | 0,21205 | NM_198524       | TIMP4     |
| 8085360 | 0,09 | 1,07 | 0,80917 | -1,00 | -2,00 | 0,01101 | NM_003256       | TMEM55B   |
| 7977584 | 0,09 | 1,07 | 0,88391 | 1,57  | 2,98  | 0,03045 | NM_001100814    | ZNF732    |
| 8098745 | 0,09 | 1,07 | 0,74440 | -0,23 | -1,17 | 0,41597 | NM_001137608    | CLEC3A    |
| 7997346 | 0,09 | 1,07 | 0,66496 | -0,30 | -1,23 | 0,10147 | NM_005752       | SART3     |
| 7966098 | 0,09 | 1,07 | 0,83424 | 2,16  | 4,47  | 0,00044 | NM_014706       | TOMM22    |
| 8073032 | 0,09 | 1,07 | 0,86520 | 1,66  | 3,15  | 0,00080 | NM_020243       | EED       |
| 7942914 | 0,09 | 1,07 | 0,80684 | 1,66  | 3,17  | 0,04651 | NM_152991       | TAF7      |
| 8114653 | 0,09 | 1,07 | 0,68199 | 1,30  | 2,47  | 0,00251 | NM_005642       | CHMP7     |
| 8145259 | 0,09 | 1,07 | 0,58392 | 1,97  | 3,91  | 0,00042 | NM_152272       | TMEFF2    |
| 8057803 | 0,09 | 1,07 | 0,89495 | -0,90 | -1,87 | 0,00059 | NM_016192       | MTAP      |
| 8154635 | 0,09 | 1,06 | 0,49487 | 1,17  | 2,25  | 0,01546 | NM_002451       | C17orf97  |
| 8003607 | 0,09 | 1,06 | 0,67571 | 0,14  | 1,10  | 0,56700 | NM_001013672    | UBE2Q2P1  |
| 7991120 | 0,09 | 1,06 | 0,76917 | -0,35 | -1,28 | 0,31225 | NR_003661       | RPL37     |
| 8111814 | 0,09 | 1,06 | 0,87278 | -0,64 | -1,56 | 0,06491 | NM_000997       | PHF13     |
| 7897322 | 0,09 | 1,06 | 0,84998 | 0,06  | 1,04  | 0,85544 | NM_153812       | C12orf39  |
| 7954398 | 0,09 | 1,06 | 0,60658 | 0,63  | 1,55  | 0,21676 | NM_030572       | NFIC      |
| 8024623 | 0,09 | 1,06 | 0,82006 | 2,08  | 4,23  | 0,00008 | NM_205843       | OAS3      |
| 7958895 | 0,09 | 1,06 | 0,73635 | 0,73  | 1,66  | 0,12402 | NM_006187       | MAN2A2    |
| 7986132 | 0,09 | 1,06 | 0,87039 | 2,41  | 5,31  | 0,00280 | NM_006122       | SHISA4    |
| 7908758 | 0,09 | 1,06 | 0,31455 | 0,12  | 1,09  | 0,82578 | NM_198149       | PLA2G12A  |
| 8102321 | 0,09 | 1,06 | 0,85109 | 1,71  | 3,26  | 0,01135 | NM_030821       | OR4K15    |
| 8020354 | 0,09 | 1,06 | 0,92674 | -2,15 | -4,43 | 0,01480 | NM_001005486    | KTI12     |
| 7916130 | 0,09 | 1,06 | 0,85085 | 3,07  | 8,38  | 0,00402 | NM_138417       | SIN3B     |
| 8026610 | 0,09 | 1,06 | 0,66872 | 1,15  | 2,22  | 0,03932 | NM_015260       | NIPSNAP3B |
| 8157027 | 0,09 | 1,06 | 0,75532 | 0,32  | 1,25  | 0,26142 | NM_018376       | SNORA4    |
| 8084708 | 0,09 | 1,06 | 0,58792 | -0,24 | -1,18 | 0,50235 | NR_002588       | C12orf26  |
| 7957404 | 0,09 | 1,06 | 0,87588 | 0,98  | 1,97  | 0,11235 | NM_032230       | ---       |
| 7901852 | 0,09 | 1,06 | 0,84925 | -1,11 | -2,16 | 0,01829 | ---             | CHAF1B    |
| 8068478 | 0,09 | 1,06 | 0,78435 | 2,11  | 4,32  | 0,00017 | NM_005441       | RAB31P    |
| 7957072 | 0,09 | 1,06 | 0,74936 | 2,90  | 7,45  | 0,00005 | NM_175623       | SPAG5     |
| 8013671 | 0,09 | 1,06 | 0,65092 | 3,09  | 8,54  | 0,00015 | NM_006461       | RAB32     |
| 8122554 | 0,09 | 1,06 | 0,76759 | -0,01 | -1,01 | 0,97832 | NM_006834       | C3orf75   |
| 8086784 | 0,09 | 1,06 | 0,79908 | 0,90  | 1,86  | 0,03744 | NM_001031703    | MYCT1     |
| 8122860 | 0,09 | 1,06 | 0,75836 | -0,99 | -1,99 | 0,03054 | NM_025107       | PFKL      |
| 8069057 | 0,09 | 1,06 | 0,79769 | 1,68  | 3,21  | 0,03568 | NR_024108       | CHMP4A    |
| 7978174 | 0,09 | 1,06 | 0,83836 | 0,68  | 1,60  | 0,00879 | NM_014169       | MRPS17    |
| 8132922 | 0,09 | 1,06 | 0,74440 | 0,34  | 1,27  | 0,54332 | NM_015969       | TNRC18    |
| 8137953 | 0,09 | 1,06 | 0,69932 | 0,08  | 1,06  | 0,84030 | NM_001080495    | DBNDD2    |
| 8062971 | 0,09 | 1,06 | 0,88313 | 1,98  | 3,95  | 0,00021 | NM_001048223    | NAALADL1  |
| 7949344 | 0,09 | 1,06 | 0,76606 | -0,63 | -1,55 | 0,11255 | NM_005468       | MGST2     |
| 8097513 | 0,09 | 1,06 | 0,65939 | 1,79  | 3,46  | 0,00202 | NM_002413       | SSRP1     |
| 7948211 | 0,09 | 1,06 | 0,79258 | -0,92 | -1,89 | 0,00112 | AB209132 ZNF835 |           |
| 8039605 | 0,09 | 1,06 | 0,88613 | -1,71 | -3,27 | 0,01001 | NM_001005850    | LCN8      |
| 8165295 | 0,09 | 1,06 | 0,86453 | -2,14 | -4,42 | 0,00015 | ENST00000371686 | RPL26L1   |
| 8110018 | 0,09 | 1,06 | 0,87749 | -0,45 | -1,37 | 0,27876 | NM_016093       | CCDC30    |
| 7900555 | 0,09 | 1,06 | 0,70005 | -0,42 | -1,34 | 0,07513 | NM_001080850    | GDEP      |
| 8096027 | 0,09 | 1,06 | 0,22147 | -0,49 | -1,41 | 0,10645 | NR_026555       | NISCH     |
| 8080320 | 0,09 | 1,06 | 0,66999 | 1,55  | 2,93  | 0,02540 | NM_007184       | ---       |
| 7945989 | 0,09 | 1,06 | 0,88015 | -1,06 | -2,09 | 0,01138 | ---             | SNORA75   |
| 8059708 | 0,09 | 1,06 | 0,81469 | -0,81 | -1,75 | 0,00440 | NR_002921       | RPS6KB2   |
| 7941900 | 0,08 | 1,06 | 0,72124 | 1,65  | 3,13  | 0,00121 | NM_003952       | TANC2     |
| 8009075 | 0,08 | 1,06 | 0,79681 | 2,80  | 6,98  | 0,00794 | NM_025185       | OR2G6     |
| 7911287 | 0,08 | 1,06 | 0,88166 | -0,89 | -1,85 | 0,01780 | NM_001013355    | FAM113A   |
| 8064557 | 0,08 | 1,06 | 0,57539 | 0,95  | 1,93  | 0,10617 | AK293638 ---    |           |
| 7919854 | 0,08 | 1,06 | 0,93002 | -2,22 | -4,66 | 0,01224 | ---             | VAMP1     |
| 7960544 | 0,08 | 1,06 | 0,77627 | 2,01  | 4,03  | 0,00854 | NM_199245       | C14orf147 |
| 7978553 | 0,08 | 1,06 | 0,84758 | 4,28  | 19,37 | 0,00004 | NM_138288       | ABCB1     |
| 8140782 | 0,08 | 1,06 | 0,85595 | -0,69 | -1,61 | 0,00675 | NM_000927       | KRTAP4-3  |
| 8015240 | 0,08 | 1,06 | 0,88393 | -0,29 | -1,22 | 0,33242 | NM_033187       | SYTL3     |
| 8123080 | 0,08 | 1,06 | 0,84480 | -0,23 | -1,17 | 0,49450 | NM_001009991    | GAS2L3    |
| 7957850 | 0,08 | 1,06 | 0,85991 | 0,47  | 1,39  | 0,45841 | NM_174942       | POLR3D    |
| 8145085 | 0,08 | 1,06 | 0,76758 | 1,13  | 2,19  | 0,05845 | NM_001722       | KRT14     |
| 8015366 | 0,08 | 1,06 | 0,88303 | -1,17 | -2,25 | 0,02673 | NM_000526       | HVCN1     |
| 7966356 | 0,08 | 1,06 | 0,66069 | -0,48 | -1,40 | 0,08281 | NM_001040107    | PLEKHA6   |
| 7923635 | 0,08 | 1,06 | 0,91639 | -0,28 | -1,21 | 0,38668 | NM_014935       | WDR54     |
| 8042843 | 0,08 | 1,06 | 0,66585 | 0,09  | 1,06  | 0,83235 | NM_032118       | ENO2      |
| 7953532 | 0,08 | 1,06 | 0,81631 | 2,04  | 4,11  | 0,00264 | NM_001975       | NOC2L     |
| 7911359 | 0,08 | 1,06 | 0,89022 | 1,99  | 3,99  | 0,03245 | NM_015658       | ---       |
| 8175490 | 0,08 | 1,06 | 0,78921 | -0,88 | -1,84 | 0,02322 | ---             | ZC3H4     |

|         |      |      |         |       |       |         |                 |              |
|---------|------|------|---------|-------|-------|---------|-----------------|--------------|
| 8037856 | 0,08 | 1,06 | 0,67208 | 0,43  | 1,34  | 0,41186 | NM_015168       | ADCY4        |
| 7978285 | 0,08 | 1,06 | 0,80576 | -0,36 | -1,28 | 0,48552 | NM_139247       | PPT2         |
| 8179451 | 0,08 | 1,06 | 0,30134 | 1,06  | 2,09  | 0,08992 | NM_005155       | LOC729020    |
| 7930205 | 0,08 | 1,06 | 0,91959 | -0,36 | -1,28 | 0,40058 | NM_001143909    | KIAA1704     |
| 7968898 | 0,08 | 1,06 | 0,54794 | 0,63  | 1,55  | 0,32756 | BC039586 ---    |              |
| 8089849 | 0,08 | 1,06 | 0,78348 | -0,60 | -1,52 | 0,08247 | ---             | ---          |
| 7984008 | 0,08 | 1,06 | 0,83756 | 0,46  | 1,38  | 0,27592 | ---             | GDF5         |
| 8065905 | 0,08 | 1,06 | 0,75076 | -0,50 | -1,42 | 0,06727 | NM_000557       | ANXA3        |
| 8095986 | 0,08 | 1,06 | 0,84700 | 4,52  | 22,93 | 0,00001 | NM_005139       | RCAN3        |
| 7898957 | 0,08 | 1,06 | 0,82269 | 1,76  | 3,38  | 0,00170 | NM_013441       | ZNF479       |
| 8139800 | 0,08 | 1,06 | 0,84242 | -0,79 | -1,73 | 0,00628 | NM_033273       | ZNF471       |
| 8031650 | 0,08 | 1,06 | 0,87881 | -0,33 | -1,26 | 0,49515 | NM_020813       | CLTCL1       |
| 8074399 | 0,08 | 1,06 | 0,78170 | 0,43  | 1,34  | 0,02034 | NM_007098       | PKN1         |
| 8026315 | 0,08 | 1,06 | 0,86091 | 1,30  | 2,47  | 0,05685 | NM_213560       | LOC100287852 |
| 8081335 | 0,08 | 1,05 | 0,90567 | 0,40  | 1,32  | 0,04162 | ENST00000426236 | NUPL2        |
| 8131831 | 0,08 | 1,05 | 0,87340 | 1,99  | 3,96  | 0,01570 | NM_007342       | ---          |
| 8040415 | 0,08 | 1,05 | 0,82646 | -0,45 | -1,36 | 0,09677 | ---             | SDSL         |
| 7959002 | 0,08 | 1,05 | 0,79980 | 0,56  | 1,48  | 0,36718 | NM_138432       | KRTAP5-7     |
| 7942255 | 0,08 | 1,05 | 0,94453 | -2,41 | -5,33 | 0,02509 | NM_001012503    | PIH1D1       |
| 8038382 | 0,08 | 1,05 | 0,79890 | 1,47  | 2,77  | 0,00014 | NM_017916       | OR2W1        |
| 8124630 | 0,08 | 1,05 | 0,77237 | -0,51 | -1,42 | 0,09618 | NM_030903       | OR2W1        |
| 8178283 | 0,08 | 1,05 | 0,77237 | -0,51 | -1,42 | 0,09618 | NM_030903       | OR2W1        |
| 8179587 | 0,08 | 1,05 | 0,77237 | -0,51 | -1,42 | 0,09618 | NM_030903       | BCL2L11      |
| 8044375 | 0,08 | 1,05 | 0,18709 | 2,10  | 4,29  | 0,00023 | NM_138621       | PIK3C2B      |
| 7923662 | 0,08 | 1,05 | 0,77146 | 1,81  | 3,50  | 0,01065 | NM_002646       | NACC2        |
| 8165077 | 0,08 | 1,05 | 0,88885 | 0,53  | 1,44  | 0,51625 | NM_144653       | REEP2        |
| 8108359 | 0,08 | 1,05 | 0,72257 | -0,13 | -1,10 | 0,27480 | NM_016606       | KHSRP        |
| 8033162 | 0,08 | 1,05 | 0,84053 | 1,55  | 2,92  | 0,03437 | NM_003685       | ---          |
| 8126033 | 0,08 | 1,05 | 0,74021 | -1,09 | -2,12 | 0,18516 | ---             | ZNF710       |
| 7985924 | 0,07 | 1,05 | 0,87013 | 1,08  | 2,12  | 0,00667 | NM_198526       | ---          |
| 7967967 | 0,07 | 1,05 | 0,88940 | -0,68 | -1,60 | 0,23217 | ---             | GUK1         |
| 7910241 | 0,07 | 1,05 | 0,82826 | 0,33  | 1,26  | 0,27379 | NM_000858       | FGF14        |
| 7972650 | 0,07 | 1,05 | 0,83827 | -0,90 | -1,87 | 0,00851 | NM_175929       | C1orf220     |
| 7907649 | 0,07 | 1,05 | 0,76784 | -0,04 | -1,03 | 0,72838 | NR_033186       | C1orf31      |
| 7910630 | 0,07 | 1,05 | 0,85565 | 1,60  | 3,03  | 0,00515 | BC116455 LPAR4  |              |
| 8168517 | 0,07 | 1,05 | 0,59218 | -1,31 | -2,49 | 0,00190 | NM_005296       | PPT2         |
| 8118509 | 0,07 | 1,05 | 0,28114 | 1,02  | 2,03  | 0,09752 | NM_005155       | TRAPP6A      |
| 8037505 | 0,07 | 1,05 | 0,78650 | 0,98  | 1,97  | 0,00698 | NM_024108       | ZNF790       |
| 8036357 | 0,07 | 1,05 | 0,73560 | 0,22  | 1,17  | 0,13811 | NM_206894       | MSC          |
| 8151334 | 0,07 | 1,05 | 0,86399 | 0,00  | 1,00  | 0,98668 | NM_005098       | FAM72D       |
| 7909146 | 0,07 | 1,05 | 0,81800 | 2,70  | 6,50  | 0,00751 | AB096683 BTF3   |              |
| 8106181 | 0,07 | 1,05 | 0,84515 | 0,72  | 1,65  | 0,01587 | NM_001037637    | CKB          |
| 7981427 | 0,07 | 1,05 | 0,83695 | 2,48  | 5,59  | 0,00152 | NM_001823       | WNK3         |
| 8173059 | 0,07 | 1,05 | 0,55551 | -0,20 | -1,15 | 0,60617 | NM_020922       | KIF4A        |
| 8168146 | 0,07 | 1,05 | 0,88492 | 2,18  | 4,53  | 0,03109 | NM_012310       | PLEKHB1      |
| 7942453 | 0,07 | 1,05 | 0,89434 | 1,12  | 2,18  | 0,15397 | NM_021200       | FAM119B      |
| 7956631 | 0,07 | 1,05 | 0,72870 | 1,37  | 2,59  | 0,00264 | NM_206914       | NOP56        |
| 8060484 | 0,07 | 1,05 | 0,57200 | 0,29  | 1,22  | 0,31583 | NR_027700       | SORBS1       |
| 7935188 | 0,07 | 1,05 | 0,73603 | 0,40  | 1,32  | 0,08406 | NM_001034954    | MGC39372     |
| 8123606 | 0,07 | 1,05 | 0,88004 | 1,03  | 2,05  | 0,01144 | BC025340 UBXN4  |              |
| 8055404 | 0,07 | 1,05 | 0,86198 | -1,94 | -3,83 | 0,00379 | NM_014607       | SLC4A11      |
| 8064613 | 0,07 | 1,05 | 0,56550 | 2,36  | 5,13  | 0,00087 | NM_032034       | RNASET2      |
| 8130768 | 0,07 | 1,05 | 0,69053 | 0,78  | 1,72  | 0,00257 | NM_003730       | ZNF200       |
| 7998931 | 0,07 | 1,05 | 0,83147 | 0,42  | 1,34  | 0,04518 | NM_198088       | HIRA         |
| 8074432 | 0,07 | 1,05 | 0,90179 | 2,27  | 4,83  | 0,00016 | NM_003325       | CCNL2        |
| 7911539 | 0,07 | 1,05 | 0,78271 | 1,38  | 2,60  | 0,00004 | NM_030937       | HSPC157      |
| 7898736 | 0,07 | 1,05 | 0,90255 | 0,76  | 1,70  | 0,08738 | NR_023918       | ZNF436       |
| 7913582 | 0,07 | 1,05 | 0,84163 | 0,75  | 1,68  | 0,04350 | NM_001077195    | HSD17B2      |
| 7997491 | 0,07 | 1,05 | 0,66613 | -0,72 | -1,65 | 0,01564 | NM_002153       | OR52W1       |
| 7938076 | 0,07 | 1,05 | 0,93989 | -1,26 | -2,39 | 0,05462 | NM_001005178    | MAGEF1       |
| 8092514 | 0,07 | 1,05 | 0,80298 | 0,73  | 1,66  | 0,05244 | NM_022149       | ACCN2        |
| 7955317 | 0,07 | 1,05 | 0,80658 | 2,99  | 7,95  | 0,00315 | NM_020039       | CD36         |
| 8133876 | 0,07 | 1,05 | 0,90129 | -0,44 | -1,36 | 0,00165 | NM_001001548    | FMN2         |
| 7910923 | 0,06 | 1,05 | 0,77284 | -0,23 | -1,17 | 0,41513 | NM_020066       | ATP5SL       |
| 8037037 | 0,06 | 1,05 | 0,87314 | 3,28  | 9,73  | 0,00235 | NM_001167867    | HFE          |
| 8117343 | 0,06 | 1,05 | 0,64098 | 1,00  | 2,00  | 0,00040 | NM_000410       | EIF1AD       |
| 7949545 | 0,06 | 1,05 | 0,90403 | 2,10  | 4,29  | 0,01181 | NM_032325       | LPPR2        |
| 8025877 | 0,06 | 1,05 | 0,85576 | 0,43  | 1,35  | 0,57532 | NM_022737       | ---          |
| 8156895 | 0,06 | 1,05 | 0,82890 | 0,09  | 1,07  | 0,65869 | ---             | ---          |
| 7939005 | 0,06 | 1,05 | 0,88893 | -1,26 | -2,40 | 0,00857 | ---             | C7orf69      |
| 8132710 | 0,06 | 1,05 | 0,83248 | -1,02 | -2,03 | 0,00190 | NM_025031       | TMEM173      |
| 8114536 | 0,06 | 1,04 | 0,88798 | -0,68 | -1,60 | 0,29412 | NM_198282       | LOC441666    |
| 8069494 | 0,06 | 1,04 | 0,77547 | -0,26 | -1,20 | 0,45696 | NR_024380       | PI15         |

|         |      |      |         |       |       |         |                  |            |
|---------|------|------|---------|-------|-------|---------|------------------|------------|
| 8146957 | 0,06 | 1,04 | 0,78834 | 0,13  | 1,09  | 0,75039 | NM_015886        | SPP1       |
| 8096301 | 0,06 | 1,04 | 0,85923 | -1,25 | -2,37 | 0,03815 | NM_001040058     | ---        |
| 8017253 | 0,06 | 1,04 | 0,77910 | -0,19 | -1,14 | 0,10203 | ---              | CSNK1D     |
| 8010778 | 0,06 | 1,04 | 0,91078 | 0,57  | 1,48  | 0,08096 | NM_001893        | TMUB1      |
| 8143879 | 0,06 | 1,04 | 0,82451 | 0,60  | 1,51  | 0,32215 | NM_001136044     | S100P      |
| 8093950 | 0,06 | 1,04 | 0,74488 | 0,82  | 1,77  | 0,04270 | NM_005980        | LOC644714  |
| 8086538 | 0,06 | 1,04 | 0,94332 | -1,94 | -3,85 | 0,04071 | BC047037 HMG1    |            |
| 8070389 | 0,06 | 1,04 | 0,90862 | 0,90  | 1,86  | 0,22434 | NM_004965        | NGAMT2     |
| 7970467 | 0,06 | 1,04 | 0,80782 | 0,10  | 1,07  | 0,82559 | NM_174928        | LENG8      |
| 8031176 | 0,06 | 1,04 | 0,71229 | 1,01  | 2,01  | 0,03847 | NM_052925        | GOLGA6L1   |
| 7981787 | 0,06 | 1,04 | 0,92227 | -1,50 | -2,84 | 0,03821 | NM_001001413     | ---        |
| 8176574 | 0,06 | 1,04 | 0,87275 | -0,51 | -1,42 | 0,07762 | ---              | PAPPA2     |
| 7907572 | 0,06 | 1,04 | 0,84258 | -1,10 | -2,14 | 0,00196 | NM_020318        | RPAP1      |
| 7987675 | 0,06 | 1,04 | 0,92563 | 1,88  | 3,68  | 0,01850 | NM_015540        | SCN1B      |
| 8027719 | 0,06 | 1,04 | 0,78361 | -0,02 | -1,01 | 0,94372 | NM_001037        | MDFIC      |
| 8135568 | 0,06 | 1,04 | 0,78402 | 0,06  | 1,04  | 0,91503 | NM_199072        | ---        |
| 8156112 | 0,06 | 1,04 | 0,87174 | -0,55 | -1,47 | 0,02417 | ---              | RGS16      |
| 7922717 | 0,06 | 1,04 | 0,88549 | 0,62  | 1,53  | 0,06971 | NM_002928        | TMEM212    |
| 8083897 | 0,06 | 1,04 | 0,76546 | -1,20 | -2,29 | 0,01114 | NM_001164436     | NOX4       |
| 7950933 | 0,06 | 1,04 | 0,87995 | -1,48 | -2,79 | 0,03403 | NM_016931        | TERF2IP    |
| 7997281 | 0,06 | 1,04 | 0,86315 | -0,03 | -1,02 | 0,94426 | NM_018975        | PLCD1      |
| 8086185 | 0,06 | 1,04 | 0,82323 | 0,39  | 1,31  | 0,30958 | NM_006225        | TMEM38A    |
| 8026579 | 0,06 | 1,04 | 0,88548 | 0,55  | 1,46  | 0,13294 | NM_024074        | NXT2       |
| 8169352 | 0,06 | 1,04 | 0,87843 | 0,65  | 1,57  | 0,01532 | NM_018698        | PWP2       |
| 8069003 | 0,06 | 1,04 | 0,87266 | 1,46  | 2,76  | 0,05138 | NM_005049        | LOC728498  |
| 7982284 | 0,06 | 1,04 | 0,96665 | 0,26  | 1,20  | 0,63899 | ENST00000450802  | CXCR7      |
| 8049471 | 0,06 | 1,04 | 0,86284 | -0,13 | -1,09 | 0,51413 | NM_020311        | ---        |
| 8107468 | 0,06 | 1,04 | 0,75003 | -0,19 | -1,14 | 0,44498 | ---              | CHFR       |
| 7967841 | 0,06 | 1,04 | 0,88661 | 0,81  | 1,76  | 0,08826 | NM_001161344     | POFUT1     |
| 8061706 | 0,06 | 1,04 | 0,72540 | 1,43  | 2,70  | 0,00021 | NM_015352        | BCKDHB     |
| 8120860 | 0,06 | 1,04 | 0,94064 | 3,58  | 11,98 | 0,00002 | NM_183050        | RPUSD3     |
| 8085233 | 0,06 | 1,04 | 0,91999 | 3,85  | 14,40 | 0,00133 | NM_173659        | WHSC2      |
| 8098942 | 0,06 | 1,04 | 0,56229 | 0,81  | 1,76  | 0,05326 | NM_005663        | REPIN1     |
| 8137225 | 0,06 | 1,04 | 0,90579 | 1,20  | 2,30  | 0,05783 | NM_013400        | ZNF26      |
| 7960134 | 0,06 | 1,04 | 0,83266 | 1,18  | 2,27  | 0,00006 | NM_019591        | ITPR1L2    |
| 7993622 | 0,06 | 1,04 | 0,89882 | 0,56  | 1,47  | 0,42296 | NM_001034841     | TP53RK     |
| 8066776 | 0,06 | 1,04 | 0,79557 | -0,16 | -1,12 | 0,64048 | NM_033550        | ---        |
| 7913642 | 0,06 | 1,04 | 0,83952 | -0,56 | -1,47 | 0,05044 | ---              | IL6R       |
| 7905789 | 0,06 | 1,04 | 0,85036 | 1,89  | 3,71  | 0,01966 | NM_000565        | LOC654342  |
| 8053722 | 0,06 | 1,04 | 0,95080 | 2,13  | 4,38  | 0,00419 | NR_027238        | ---        |
| 8122701 | 0,06 | 1,04 | 0,09670 | 0,11  | 1,08  | 0,61833 | ---              | LOC143188  |
| 7930533 | 0,06 | 1,04 | 0,89511 | 0,00  | -1,00 | 0,99335 | NR_015409        | MIR503     |
| 8175261 | 0,05 | 1,04 | 0,85971 | 0,03  | 1,02  | 0,85672 | NR_030228        | RTN4IP1    |
| 8128606 | 0,05 | 1,04 | 0,84687 | 1,78  | 3,43  | 0,00107 | NM_032730        | TXNDC16    |
| 7979158 | 0,05 | 1,04 | 0,90567 | 0,77  | 1,71  | 0,06382 | NM_020784        | MRPS34     |
| 7998585 | 0,05 | 1,04 | 0,90417 | 1,17  | 2,25  | 0,04369 | NM_023936        | CXorf40B   |
| 8175642 | 0,05 | 1,04 | 0,89470 | 1,45  | 2,72  | 0,07599 | NM_001013845     | NCRNA00183 |
| 8168412 | 0,05 | 1,04 | 0,94149 | 0,74  | 1,67  | 0,07233 | BC029480 PLEKHG2 |            |
| 8028656 | 0,05 | 1,04 | 0,79507 | 0,81  | 1,76  | 0,04196 | NM_022835        | ZNF202     |
| 7952361 | 0,05 | 1,04 | 0,83159 | 1,65  | 3,15  | 0,00127 | NM_003455        | LYRM7      |
| 8107859 | 0,05 | 1,04 | 0,88581 | 0,35  | 1,28  | 0,20537 | NM_181705        | RNF220     |
| 7900979 | 0,05 | 1,04 | 0,92506 | 2,54  | 5,83  | 0,00030 | NM_018150        | YIPF4      |
| 8041273 | 0,05 | 1,04 | 0,78436 | 1,17  | 2,25  | 0,01099 | NM_032312        | UBAC2      |
| 7969776 | 0,05 | 1,04 | 0,89872 | 2,01  | 4,04  | 0,00516 | NR_026644        | TP53INP2   |
| 8062034 | 0,05 | 1,04 | 0,78278 | -0,11 | -1,08 | 0,90550 | NM_021202        | ---        |
| 8095360 | 0,05 | 1,04 | 0,89304 | 1,27  | 2,41  | 0,04222 | ---              | FLJ30430   |
| 7925031 | 0,05 | 1,04 | 0,95241 | -1,04 | -2,06 | 0,00224 | AK054992 PER2    |            |
| 8059996 | 0,05 | 1,04 | 0,68729 | -0,21 | -1,15 | 0,59869 | NM_022817        | KIAA1712   |
| 8098348 | 0,05 | 1,04 | 0,85869 | 0,41  | 1,33  | 0,27060 | NM_001040157     | STARD9     |
| 7983145 | 0,05 | 1,04 | 0,80725 | 0,63  | 1,55  | 0,02918 | NM_020759        | ---        |
| 8173609 | 0,05 | 1,04 | 0,81292 | 0,50  | 1,41  | 0,34600 | ---              | METTL13    |
| 7907353 | 0,05 | 1,04 | 0,92353 | 1,90  | 3,73  | 0,01487 | NM_015935        | ZRSR2      |
| 8166195 | 0,05 | 1,04 | 0,93934 | -0,58 | -1,50 | 0,47044 | NM_005089        | ARG2       |
| 7975268 | 0,05 | 1,04 | 0,85383 | 2,76  | 6,79  | 0,00306 | NM_001172        | ACAA1      |
| 8086201 | 0,05 | 1,04 | 0,84103 | -0,70 | -1,63 | 0,25120 | NM_001607        | ZNF284     |
| 8029368 | 0,05 | 1,04 | 0,73610 | 0,86  | 1,82  | 0,02109 | NM_001037813     | MELK       |
| 8155214 | 0,05 | 1,04 | 0,87207 | 1,92  | 3,79  | 0,00013 | NM_014791        | TPM3       |
| 7920472 | 0,05 | 1,04 | 0,76647 | -0,63 | -1,55 | 0,04595 | NM_152263        | ---        |
| 8158212 | 0,05 | 1,04 | 0,92889 | -0,34 | -1,26 | 0,54976 | ---              | RBM8A      |
| 7904751 | 0,05 | 1,04 | 0,78944 | 0,16  | 1,12  | 0,67758 | BC017770 OTUD6A  |            |
| 8168083 | 0,05 | 1,04 | 0,93075 | -1,18 | -2,26 | 0,02205 | NM_207320        | PRDM9      |
| 8104634 | 0,05 | 1,03 | 0,80977 | -0,88 | -1,84 | 0,15608 | NM_020227        | XYLT1      |
| 7999754 | 0,05 | 1,03 | 0,88918 | -1,35 | -2,55 | 0,06252 | NM_022166        | GYPC       |

|         |      |      |         |       |       |         |                 |            |
|---------|------|------|---------|-------|-------|---------|-----------------|------------|
| 8045009 | 0,05 | 1,03 | 0,83093 | -2,90 | -7,48 | 0,00033 | NM_002101       | ERP29      |
| 7958819 | 0,05 | 1,03 | 0,92873 | 0,86  | 1,81  | 0,10498 | NM_006817       | ---        |
| 8136161 | 0,05 | 1,03 | 0,85815 | -1,36 | -2,57 | 0,04016 | ---             | SNORA55    |
| 7915227 | 0,05 | 1,03 | 0,87551 | -0,48 | -1,40 | 0,36943 | NR_002983       | CACNB1     |
| 8014794 | 0,05 | 1,03 | 0,91895 | 2,00  | 4,01  | 0,00103 | NM_199247       | SLC25A20   |
| 8087224 | 0,05 | 1,03 | 0,90050 | 0,23  | 1,17  | 0,42137 | NM_000387       | ZSCAN12    |
| 8124574 | 0,05 | 1,03 | 0,89461 | 1,02  | 2,03  | 0,05310 | NR_028077       | HAO2       |
| 7904396 | 0,05 | 1,03 | 0,87418 | -0,76 | -1,69 | 0,00297 | NM_001005783    | FAM74A3    |
| 8155345 | 0,05 | 1,03 | 0,93728 | -1,37 | -2,59 | 0,00557 | ENST00000377629 | ---        |
| 8151869 | 0,05 | 1,03 | 0,91483 | 0,05  | 1,04  | 0,73570 | ---             | ODF2       |
| 8158269 | 0,05 | 1,03 | 0,82392 | 0,62  | 1,54  | 0,07356 | NM_002540       | HIATL2     |
| 8162645 | 0,05 | 1,03 | 0,91293 | 1,47  | 2,76  | 0,02693 | NR_002894       | DMD        |
| 8171921 | 0,05 | 1,03 | 0,78339 | -0,87 | -1,83 | 0,01935 | NM_000109       | LOH12CR1   |
| 7954012 | 0,05 | 1,03 | 0,82962 | 0,78  | 1,72  | 0,12002 | NM_058169       | CATSPER2P1 |
| 7988208 | 0,05 | 1,03 | 0,92255 | 0,47  | 1,39  | 0,67396 | NR_002318       | C6orf141   |
| 8120176 | 0,05 | 1,03 | 0,93416 | 1,91  | 3,76  | 0,01942 | NM_001145652    | RNF144A    |
| 8040090 | 0,05 | 1,03 | 0,89117 | 1,30  | 2,46  | 0,00013 | NM_014746       | FAHD2A     |
| 8043564 | 0,05 | 1,03 | 0,91688 | 1,00  | 2,00  | 0,07422 | NM_016044       | EFCAB2     |
| 7911096 | 0,05 | 1,03 | 0,81578 | 0,78  | 1,72  | 0,07609 | NR_026588       | ---        |
| 8022275 | 0,05 | 1,03 | 0,73921 | -0,72 | -1,65 | 0,00201 | ---             | PPFIA2     |
| 7965166 | 0,05 | 1,03 | 0,88585 | -1,19 | -2,28 | 0,04899 | NM_003625       | OAS1       |
| 7958884 | 0,05 | 1,03 | 0,72536 | -1,77 | -3,42 | 0,00091 | NM_016816       | TLN2       |
| 7984019 | 0,05 | 1,03 | 0,77881 | -0,25 | -1,19 | 0,52085 | NM_015059       | C10orf55   |
| 7934505 | 0,05 | 1,03 | 0,86199 | -0,31 | -1,24 | 0,04409 | NM_001001791    | GUSBL2     |
| 8127364 | 0,04 | 1,03 | 0,96409 | 2,54  | 5,83  | 0,02702 | NR_003660       | KLHL11     |
| 8015456 | 0,04 | 1,03 | 0,91440 | 0,91  | 1,88  | 0,01598 | NM_018143       | SCUBE2     |
| 7946454 | 0,04 | 1,03 | 0,73682 | -0,21 | -1,15 | 0,19905 | NM_020974       | DCK        |
| 8095574 | 0,04 | 1,03 | 0,94546 | 2,00  | 4,00  | 0,00165 | NM_000788       | ---        |
| 7993774 | 0,04 | 1,03 | 0,90686 | -0,56 | -1,47 | 0,01170 | ---             | ABCB4      |
| 8140752 | 0,04 | 1,03 | 0,89556 | -0,82 | -1,77 | 0,00320 | NM_000443       | ---        |
| 8133273 | 0,04 | 1,03 | 0,93687 | 0,08  | 1,05  | 0,88181 | ---             | MRPS30     |
| 8105181 | 0,04 | 1,03 | 0,89946 | 3,25  | 9,53  | 0,00003 | NM_016640       | KRTAP13-2  |
| 8069813 | 0,04 | 1,03 | 0,88211 | -0,32 | -1,25 | 0,20986 | NM_181621       | PRKD2      |
| 8037794 | 0,04 | 1,03 | 0,89299 | 0,95  | 1,93  | 0,06162 | NM_016457       | CENPP      |
| 8156341 | 0,04 | 1,03 | 0,80092 | 0,10  | 1,07  | 0,55845 | NM_001012267    | OR52I1     |
| 7937948 | 0,04 | 1,03 | 0,91559 | -0,68 | -1,61 | 0,08554 | NM_001005169    | ALAD       |
| 8163509 | 0,04 | 1,03 | 0,90056 | -0,01 | -1,01 | 0,97988 | NM_000031       | MRGRPF     |
| 7950005 | 0,04 | 1,03 | 0,77084 | -1,17 | -2,26 | 0,02065 | NM_001098515    | CMAS       |
| 7954407 | 0,04 | 1,03 | 0,91796 | 1,38  | 2,61  | 0,00088 | NM_018686       | MIRLET7A2  |
| 7952313 | 0,04 | 1,03 | 0,94355 | -1,36 | -2,57 | 0,00260 | NR_029477       | GTF2F1     |
| 8033135 | 0,04 | 1,03 | 0,91461 | 1,25  | 2,38  | 0,02974 | NM_002096       | ---        |
| 7947989 | 0,04 | 1,03 | 0,92868 | -0,73 | -1,66 | 0,00143 | ---             | C5         |
| 8163839 | 0,04 | 1,03 | 0,90143 | 1,95  | 3,85  | 0,00497 | NM_001735       | MRPL10     |
| 8016366 | 0,04 | 1,03 | 0,92845 | -0,19 | -1,14 | 0,78629 | NM_145255       | PLEKHA8    |
| 8132045 | 0,04 | 1,03 | 0,87385 | 1,17  | 2,25  | 0,08396 | NM_032639       | HIC2       |
| 8071536 | 0,04 | 1,03 | 0,91632 | 0,33  | 1,26  | 0,53230 | NM_015094       | LOC390940  |
| 8029306 | 0,04 | 1,03 | 0,80713 | -1,27 | -2,42 | 0,03851 | AK129550        | LDLRAP1    |
| 7899023 | 0,04 | 1,03 | 0,92754 | 0,20  | 1,15  | 0,68327 | NM_015627       | PUS7       |
| 8142061 | 0,04 | 1,03 | 0,81656 | 2,33  | 5,02  | 0,00624 | NM_019042       | ACOX3      |
| 8099304 | 0,04 | 1,03 | 0,88815 | 0,86  | 1,81  | 0,03491 | NM_003501       | RIC8B      |
| 7958331 | 0,04 | 1,03 | 0,93474 | 0,79  | 1,72  | 0,04118 | NM_018157       | SLC25A27   |
| 8120067 | 0,04 | 1,03 | 0,73208 | -0,48 | -1,39 | 0,09844 | NM_004277       | RG9MTD1    |
| 8081343 | 0,04 | 1,03 | 0,95646 | 0,81  | 1,76  | 0,01590 | NM_017819       | BRD4       |
| 8034983 | 0,04 | 1,03 | 0,85675 | 0,63  | 1,55  | 0,00518 | NM_058243       | METTL5     |
| 8056716 | 0,04 | 1,03 | 0,95462 | 1,10  | 2,14  | 0,01415 | NM_014168       | RNU4ATAC   |
| 8044961 | 0,04 | 1,03 | 0,79298 | -1,25 | -2,38 | 0,01898 | NR_023343       | JMJD4      |
| 7924823 | 0,04 | 1,03 | 0,92070 | 0,42  | 1,34  | 0,24515 | NM_023007       | C1orf77    |
| 7905589 | 0,04 | 1,03 | 0,91275 | 1,36  | 2,57  | 0,01704 | NM_015607       | CHRNA3     |
| 7990714 | 0,04 | 1,03 | 0,88420 | -0,97 | -1,96 | 0,01836 | NM_000743       | C2CD2L     |
| 7944418 | 0,04 | 1,03 | 0,91320 | 1,05  | 2,07  | 0,00856 | NM_014807       | CYP3A7     |
| 8141342 | 0,04 | 1,03 | 0,86529 | -1,05 | -2,08 | 0,00422 | NM_000765       | ---        |
| 7951668 | 0,04 | 1,03 | 0,95910 | -0,96 | -1,95 | 0,10107 | ---             | PINK1      |
| 7913249 | 0,04 | 1,03 | 0,89586 | 0,28  | 1,21  | 0,37307 | NM_032409       | LAT        |
| 7994535 | 0,04 | 1,03 | 0,88861 | -0,30 | -1,23 | 0,46676 | NM_014387       | PNP        |
| 7973067 | 0,04 | 1,03 | 0,90418 | 3,37  | 10,32 | 0,00004 | NM_000270       | RPIA       |
| 8043413 | 0,04 | 1,03 | 0,93073 | 2,54  | 5,83  | 0,00070 | NM_144563       | PCYT2      |
| 8019778 | 0,04 | 1,03 | 0,92504 | 1,24  | 2,36  | 0,03107 | NM_002861       | C22orf33   |
| 8075850 | 0,04 | 1,03 | 0,92159 | -1,03 | -2,04 | 0,00068 | NM_001163857    | BANK1      |
| 8096617 | 0,04 | 1,03 | 0,78895 | 0,66  | 1,58  | 0,09906 | NM_017935       | WHAMML1    |
| 7986687 | 0,04 | 1,03 | 0,85764 | 0,91  | 1,88  | 0,02927 | NR_003521       | COL4A2     |
| 7970033 | 0,04 | 1,03 | 0,90813 | -0,31 | -1,24 | 0,38794 | NM_001846       | DOK6       |
| 8021695 | 0,04 | 1,03 | 0,93299 | -1,25 | -2,37 | 0,00404 | NM_152721       | PGAP3      |
| 8014871 | 0,04 | 1,03 | 0,94403 | 0,98  | 1,97  | 0,06356 | NM_033419       | RG9MTD2    |

|         |      |      |         |       |       |         |                    |                  |
|---------|------|------|---------|-------|-------|---------|--------------------|------------------|
| 8101916 | 0,04 | 1,03 | 0,89261 | -0,33 | -1,26 | 0,30322 | NM_152292          | RPL13AP3         |
| 7974531 | 0,04 | 1,03 | 0,65852 | 0,23  | 1,17  | 0,41690 | NR_004844          | SNORD46          |
| 7901048 | 0,04 | 1,03 | 0,92578 | -0,11 | -1,08 | 0,64913 | NR_000024          | ORA13            |
| 7994981 | 0,04 | 1,03 | 0,93513 | 0,01  | 1,01  | 0,96155 | NM_152288          | CCT6B            |
| 8014172 | 0,04 | 1,03 | 0,85930 | -0,36 | -1,28 | 0,32531 | NM_006584          | ROBO2            |
| 8081001 | 0,04 | 1,03 | 0,93932 | -1,73 | -3,32 | 0,00507 | NM_002942          | RLIM             |
| 8168432 | 0,04 | 1,03 | 0,92758 | 0,02  | 1,01  | 0,97374 | NM_016120          | SNORA70E         |
| 7950751 | 0,04 | 1,03 | 0,89272 | -1,28 | -2,42 | 0,00700 | NR_033347          | VAMP8            |
| 8043197 | 0,04 | 1,03 | 0,93661 | 2,51  | 5,70  | 0,00029 | NM_003761          | AHRR             |
| 8104180 | 0,04 | 1,03 | 0,75438 | 0,33  | 1,25  | 0,26450 | NM_020731          | LPPR5            |
| 7917946 | 0,04 | 1,03 | 0,81966 | -1,53 | -2,89 | 0,00602 | NM_001037317       | RNF4             |
| 8093590 | 0,04 | 1,03 | 0,82992 | 1,30  | 2,47  | 0,00538 | NM_002938          | C11orf61         |
| 7952445 | 0,04 | 1,03 | 0,82737 | 0,63  | 1,54  | 0,07367 | NM_024631          | ---              |
| 8088770 | 0,04 | 1,03 | 0,92983 | -0,18 | -1,14 | 0,26135 | --- NUP85          | ---              |
| 8009761 | 0,04 | 1,03 | 0,92905 | 2,18  | 4,52  | 0,00229 | NM_024844          | TRAF3            |
| 7977018 | 0,04 | 1,03 | 0,88821 | 1,74  | 3,34  | 0,00032 | NM_145725          | DCLK3            |
| 8086120 | 0,04 | 1,03 | 0,88692 | -0,46 | -1,37 | 0,03620 | NM_033403          | EXOSC5           |
| 8037023 | 0,04 | 1,03 | 0,92480 | 2,15  | 4,44  | 0,01077 | NM_020158          | GIPC1            |
| 8034827 | 0,04 | 1,02 | 0,93945 | 0,11  | 1,08  | 0,80935 | NM_005716          | PLXNA3           |
| 8170921 | 0,04 | 1,02 | 0,92640 | 0,79  | 1,73  | 0,03073 | NM_017514          | C22orf39         |
| 8074458 | 0,04 | 1,02 | 0,95251 | 2,35  | 5,10  | 0,00071 | NM_173793          | C15orf51         |
| 7986520 | 0,04 | 1,02 | 0,98666 | -1,94 | -3,83 | 0,03049 | ENST00000423248    | ---              |
| 8159959 | 0,03 | 1,02 | 0,95506 | -1,23 | -2,34 | 0,01955 | --- TOX3           | ---              |
| 8001394 | 0,03 | 1,02 | 0,84099 | -0,38 | -1,30 | 0,33783 | NM_001080430       | TSPAN17          |
| 8110224 | 0,03 | 1,02 | 0,90191 | 1,83  | 3,57  | 0,01248 | NM_012171          | HSP90A85P        |
| 8080987 | 0,03 | 1,02 | 0,85839 | -1,16 | -2,23 | 0,06962 | AY956766 SIRT5     | ---              |
| 8116956 | 0,03 | 1,02 | 0,93717 | 0,87  | 1,83  | 0,03412 | NM_031244          | GEMIN4           |
| 8010946 | 0,03 | 1,02 | 0,92241 | 1,49  | 2,81  | 0,00967 | NM_015721          | SNORA45          |
| 7938293 | 0,03 | 1,02 | 0,91974 | -0,64 | -1,55 | 0,19680 | NR_002977          | VDAC1            |
| 8114145 | 0,03 | 1,02 | 0,92432 | 0,67  | 1,59  | 0,09049 | NM_003374          | OCLM             |
| 7908347 | 0,03 | 1,02 | 0,86802 | -1,01 | -2,02 | 0,09569 | NM_022375          | PRPF31           |
| 8031102 | 0,03 | 1,02 | 0,88265 | 1,06  | 2,08  | 0,09535 | NM_015629          | THOC3            |
| 8115886 | 0,03 | 1,02 | 0,81332 | 1,33  | 2,51  | 0,00082 | NM_032361          | FBXO33           |
| 7978748 | 0,03 | 1,02 | 0,92076 | 0,94  | 1,92  | 0,06363 | NM_203301          | MYBBP1A          |
| 8011640 | 0,03 | 1,02 | 0,90730 | 1,80  | 3,47  | 0,02499 | NM_014520          | NCOA5            |
| 8066668 | 0,03 | 1,02 | 0,89329 | 1,31  | 2,49  | 0,00604 | NM_020967          | SCN3A            |
| 8056376 | 0,03 | 1,02 | 0,84340 | -0,52 | -1,44 | 0,10933 | NM_006922          | BRD9             |
| 8110734 | 0,03 | 1,02 | 0,87527 | 0,67  | 1,59  | 0,10143 | NR_027633          | HNRNPA1          |
| 7955890 | 0,03 | 1,02 | 0,96893 | 1,40  | 2,64  | 0,02965 | NM_031157          | ---              |
| 7898535 | 0,03 | 1,02 | 0,84158 | -0,10 | -1,07 | 0,62785 | --- MDN1           | ---              |
| 8128138 | 0,03 | 1,02 | 0,80830 | 0,91  | 1,87  | 0,00374 | NM_014611          | TRMU             |
| 8073875 | 0,03 | 1,02 | 0,92544 | 0,36  | 1,29  | 0,13108 | NM_018006          | SNORD38A         |
| 7901050 | 0,03 | 1,02 | 0,88894 | -0,12 | -1,09 | 0,56252 | NR_001456          | FLJ40536         |
| 7936916 | 0,03 | 1,02 | 0,88971 | -1,03 | -2,05 | 0,00173 | AK097855 ---       | ---              |
| 8157191 | 0,03 | 1,02 | 0,97354 | -1,87 | -3,66 | 0,00614 | --- C9orf70        | ---              |
| 8154132 | 0,03 | 1,02 | 0,90839 | -1,06 | -2,08 | 0,01458 | NR_026663          | MAOB             |
| 8172204 | 0,03 | 1,02 | 0,92136 | -0,43 | -1,35 | 0,02731 | NM_000898          | ZNF618           |
| 8157362 | 0,03 | 1,02 | 0,91426 | 2,13  | 4,38  | 0,00075 | NM_133374          | CTSL3            |
| 8156240 | 0,03 | 1,02 | 0,91004 | -0,57 | -1,49 | 0,32879 | NR_027917          | WDR5B            |
| 8089993 | 0,03 | 1,02 | 0,95086 | 0,53  | 1,44  | 0,22524 | NM_019069          | RABGAP1L         |
| 7907492 | 0,03 | 1,02 | 0,91765 | 0,72  | 1,65  | 0,04518 | NM_014857          | SPAG7            |
| 8011765 | 0,03 | 1,02 | 0,94628 | 1,01  | 2,01  | 0,00033 | NM_004890          | KRTAP11-1        |
| 8069872 | 0,03 | 1,02 | 0,96300 | -1,17 | -2,25 | 0,01620 | NM_175858          | MGC27345         |
| 8142770 | 0,03 | 1,02 | 0,93290 | 0,55  | 1,46  | 0,01376 | ENST00000424840    | C1orf38          |
| 7899394 | 0,03 | 1,02 | 0,92779 | 1,47  | 2,77  | 0,02173 | NM_001105556       | SPEN             |
| 7898278 | 0,03 | 1,02 | 0,94990 | 2,63  | 6,17  | 0,00063 | NM_015001          | GTF2IRD1         |
| 8133477 | 0,03 | 1,02 | 0,91013 | 1,77  | 3,40  | 0,02670 | NM_016328          | CBFA2T2          |
| 8061919 | 0,03 | 1,02 | 0,94770 | 1,38  | 2,61  | 0,00028 | NM_005093          | APCDD1           |
| 8020141 | 0,03 | 1,02 | 0,95953 | -0,80 | -1,74 | 0,02081 | NM_153000          | MON1B            |
| 7997321 | 0,03 | 1,02 | 0,95562 | 1,65  | 3,15  | 0,00767 | NM_014940          | EPOR             |
| 8034217 | 0,03 | 1,02 | 0,90267 | 0,02  | 1,01  | 0,92732 | NM_000121          | MPHOSPH8         |
| 7967881 | 0,03 | 1,02 | 0,92907 | 0,92  | 1,89  | 0,03541 | NM_017520          | MBNL3            |
| 8175177 | 0,03 | 1,02 | 0,94295 | 0,41  | 1,32  | 0,11580 | NM_018388          | ZNF708 // ZNF708 |
| 8020377 | 0,03 | 1,02 | 0,92080 | -0,48 | -1,40 | 0,09805 | ENST00000356929 // | ENST00000356929  |
| ---     | ---  | ---  | ---     | ---   | ---   | ---     | ---                | ---              |
| 7906175 | 0,03 | 1,02 | 0,93501 | -1,29 | -2,45 | 0,01126 | --- ZNF830         | ---              |
| 8006477 | 0,03 | 1,02 | 0,92624 | 1,27  | 2,42  | 0,06771 | NM_052857          | MFSD9            |
| 8054356 | 0,03 | 1,02 | 0,93659 | 1,26  | 2,39  | 0,07394 | NM_032718          | TM4SF4           |
| 8083301 | 0,03 | 1,02 | 0,92016 | -0,21 | -1,15 | 0,36398 | NM_004617          | KLHL23           |
| 8046186 | 0,03 | 1,02 | 0,92811 | 0,11  | 1,08  | 0,73948 | NM_144711          | PRSS27           |
| 7998843 | 0,03 | 1,02 | 0,95500 | -0,41 | -1,33 | 0,38042 | NM_031948          | ZNF749           |
| 8031748 | 0,03 | 1,02 | 0,94617 | 1,82  | 3,53  | 0,00591 | NM_001023561       | LY6G6D           |
| 8118242 | 0,03 | 1,02 | 0,94560 | -0,38 | -1,30 | 0,32078 | NM_021246          | RPPH1            |



|         |      |      |         |       |        |         |                        |             |
|---------|------|------|---------|-------|--------|---------|------------------------|-------------|
| 8045330 | 0,01 | 1,01 | 0,94192 | -0,38 | -1,30  | 0,18178 | NR_024380 // NR_024380 | LZTS2       |
| 7929911 | 0,01 | 1,01 | 0,97749 | 1,08  | 2,11   | 0,07301 | NM_032429              | MTERFD3     |
| 7966046 | 0,01 | 1,01 | 0,96039 | 0,22  | 1,17   | 0,35695 | NM_001033050           | SNORA2A     |
| 7962827 | 0,01 | 1,01 | 0,92123 | -0,65 | -1,57  | 0,04431 | NR_002950              | RANGRF      |
| 8004832 | 0,01 | 1,01 | 0,96422 | 0,00  | -1,00  | 0,98733 | NM_001177802           | KIAA1539    |
| 8160981 | 0,01 | 1,01 | 0,97126 | 0,18  | 1,13   | 0,55798 | BC004406 ZNF282        |             |
| 8137101 | 0,01 | 1,01 | 0,95881 | 0,82  | 1,76   | 0,00595 | NM_003575              | ---         |
| 8036363 | 0,01 | 1,01 | 0,98437 | -1,09 | -2,12  | 0,06609 | ---                    | NUDT2       |
| 8154885 | 0,01 | 1,01 | 0,95203 | 0,30  | 1,23   | 0,01828 | NM_001161              | EFHA2       |
| 8144742 | 0,01 | 1,01 | 0,96633 | -0,69 | -1,61  | 0,13695 | NM_181723              | HSD17B7P2   |
| 7927082 | 0,01 | 1,01 | 0,98834 | 0,01  | 1,01   | 0,98429 | NR_003086              | ---         |
| 8165684 | 0,01 | 1,01 | 0,99402 | -3,82 | -14,10 | 0,00308 | ---                    | MITD1       |
| 8054192 | 0,01 | 1,01 | 0,97823 | 0,93  | 1,90   | 0,05154 | NM_138798              | C6orf1      |
| 8125818 | 0,01 | 1,01 | 0,97839 | -0,31 | -1,24  | 0,29131 | NM_178508              | C9orf89     |
| 8156404 | 0,01 | 1,01 | 0,98257 | 2,66  | 6,34   | 0,01868 | NM_032310              | PAPOLB      |
| 8137927 | 0,01 | 1,01 | 0,98900 | -1,13 | -2,19  | 0,02804 | NM_020144              | RPL32P3     |
| 8090559 | 0,01 | 1,01 | 0,97264 | 1,86  | 3,63   | 0,00614 | NR_003111              | RXRB        |
| 8180111 | 0,01 | 1,01 | 0,99057 | 1,97  | 3,93   | 0,02828 | NM_021976              | ---         |
| 7969372 | 0,01 | 1,01 | 0,97470 | -0,65 | -1,57  | 0,00553 | ---                    | KRTAP5-5    |
| 7937700 | 0,01 | 1,01 | 0,98463 | -0,48 | -1,40  | 0,17288 | NM_001001480           | CD177       |
| 8029280 | 0,01 | 1,01 | 0,98236 | -1,23 | -2,34  | 0,00179 | NM_020406              | HCST        |
| 8028104 | 0,01 | 1,01 | 0,98894 | -0,70 | -1,62  | 0,09528 | NM_014266              | CARHSP1     |
| 7999319 | 0,01 | 1,01 | 0,98229 | 0,56  | 1,47   | 0,54883 | NM_014316              | BHLHA15     |
| 8134452 | 0,01 | 1,01 | 0,98487 | 0,14  | 1,10   | 0,70361 | NM_177455              | BST2        |
| 8035304 | 0,01 | 1,01 | 0,98209 | -0,70 | -1,62  | 0,08209 | NM_004335              | NCKIPSD     |
| 8087182 | 0,01 | 1,01 | 0,98106 | 1,63  | 3,09   | 0,00399 | NM_016453              | LZIC        |
| 7912292 | 0,01 | 1,01 | 0,98577 | 1,06  | 2,09   | 0,02794 | NM_032368              | ZNF214      |
| 7946288 | 0,01 | 1,01 | 0,98751 | -0,15 | -1,11  | 0,42257 | NM_013249              | FHOD3       |
| 8020973 | 0,01 | 1,00 | 0,98706 | 1,26  | 2,39   | 0,01339 | NM_025135              | NR2F6       |
| 8035249 | 0,01 | 1,00 | 0,97773 | 0,49  | 1,41   | 0,40050 | NM_005234              | AMBRA1      |
| 7947652 | 0,01 | 1,00 | 0,96025 | 0,14  | 1,10   | 0,70557 | NM_017749              | BAHD1       |
| 7982738 | 0,01 | 1,00 | 0,93766 | 1,40  | 2,64   | 0,00417 | NM_014952              | F2RL1       |
| 8106403 | 0,01 | 1,00 | 0,97899 | 2,49  | 5,64   | 0,00037 | NM_005242              | NIPA1       |
| 7986675 | 0,01 | 1,00 | 0,98808 | 2,25  | 4,76   | 0,01886 | NM_144599              | HIST1H3B    |
| 8124388 | 0,01 | 1,00 | 0,97699 | 1,19  | 2,28   | 0,01404 | NM_003537              | VASN        |
| 7992967 | 0,01 | 1,00 | 0,97433 | -0,73 | -1,66  | 0,09114 | NM_138440              | C15orf51    |
| 7986517 | 0,01 | 1,00 | 0,99776 | -1,79 | -3,45  | 0,08731 | ENST00000423248        | C15orf51    |
| 7986522 | 0,01 | 1,00 | 0,99776 | -1,79 | -3,45  | 0,08731 | ENST00000423248        | ZNF649      |
| 8038913 | 0,01 | 1,00 | 0,98639 | -0,84 | -1,79  | 0,00119 | NM_023074              | ---         |
| 7944333 | 0,01 | 1,00 | 0,99420 | -1,57 | -2,97  | 0,17888 | ---                    | ZFP30       |
| 8036420 | 0,01 | 1,00 | 0,97800 | 0,33  | 1,26   | 0,07396 | NM_014898              | ---         |
| 8169445 | 0,01 | 1,00 | 0,97928 | -0,01 | -1,01  | 0,96953 | ---                    | HOXA11      |
| 8138765 | 0,01 | 1,00 | 0,98102 | -0,93 | -1,90  | 0,00025 | NM_005523              | TK1         |
| 8018849 | 0,00 | 1,00 | 0,99289 | 0,98  | 1,97   | 0,11260 | NM_003258              | HOXB2       |
| 8016438 | 0,00 | 1,00 | 0,97302 | -0,50 | -1,41  | 0,04726 | NM_002145              | GPR39       |
| 8045336 | 0,00 | 1,00 | 0,98751 | 3,86  | 14,56  | 0,00025 | NM_001508              | FSCB        |
| 7978756 | 0,00 | 1,00 | 0,99299 | -0,26 | -1,20  | 0,25337 | NM_032135              | ZNF75D      |
| 8175319 | 0,00 | 1,00 | 0,96822 | 0,69  | 1,62   | 0,01236 | NM_007131              | C2orf63     |
| 8052233 | 0,00 | 1,00 | 0,99045 | -0,12 | -1,09  | 0,78124 | NM_152385              | HSF1        |
| 8148824 | 0,00 | 1,00 | 0,98924 | 0,39  | 1,31   | 0,17237 | NM_005526              | UBAC1       |
| 8165064 | 0,00 | 1,00 | 0,99121 | 1,53  | 2,89   | 0,01297 | NM_016172              | SNORD116-18 |
| 7981984 | 0,00 | 1,00 | 0,99056 | -0,75 | -1,68  | 0,07910 | NR_003333              | MPHOSPH10   |
| 8042588 | 0,00 | 1,00 | 0,99196 | 0,31  | 1,24   | 0,32450 | NM_005791              | PHLPP1      |
| 8021565 | 0,00 | 1,00 | 0,98017 | 0,35  | 1,27   | 0,02302 | NM_194449              | SNORA42     |
| 7920873 | 0,00 | 1,00 | 0,99653 | -1,69 | -3,24  | 0,03632 | NR_002974              | ---         |
| 8177046 | 0,00 | 1,00 | 0,99519 | 0,88  | 1,84   | 0,15807 | ---                    | IRS2        |
| 7972745 | 0,00 | 1,00 | 0,99168 | -0,19 | -1,14  | 0,59439 | NM_003749              | EXO1        |
| 7910997 | 0,00 | 1,00 | 0,97803 | 1,85  | 3,61   | 0,00821 | NM_130398              | EXOC5       |
| 7974564 | 0,00 | 1,00 | 0,98466 | -0,16 | -1,11  | 0,35331 | NM_006544              | C7orf72     |
| 8132811 | 0,00 | 1,00 | 0,99480 | -0,82 | -1,76  | 0,04520 | NM_001161834           | UBE2L3      |
| 8071547 | 0,00 | 1,00 | 0,99486 | -0,07 | -1,05  | 0,83499 | NR_028436              | KCTD12      |
| 7972055 | 0,00 | 1,00 | 0,99615 | -0,31 | -1,24  | 0,23968 | NM_138444              | DNAJC17     |
| 7987554 | 0,00 | 1,00 | 0,99511 | 0,43  | 1,35   | 0,35408 | NM_018163              | SPR         |
| 8042696 | 0,00 | 1,00 | 0,99092 | 0,97  | 1,96   | 0,08251 | NM_003124              | IL18R1      |
| 8044035 | 0,00 | 1,00 | 0,98776 | 0,66  | 1,58   | 0,08965 | NM_003855              | NOV         |
| 8148049 | 0,00 | 1,00 | 0,99588 | -0,03 | -1,02  | 0,92240 | NM_002514              | TMEM68      |
| 8150846 | 0,00 | 1,00 | 0,99815 | 3,02  | 8,10   | 0,00016 | NM_152417              | PRDM8       |
| 8096032 | 0,00 | 1,00 | 0,99811 | 0,02  | 1,02   | 0,92844 | NM_020226              | LRP5        |
| 7942007 | 0,00 | 1,00 | 0,99763 | 2,34  | 5,06   | 0,00088 | NM_002335              | ENC1        |
| 8112615 | 0,00 | 1,00 | 0,99865 | 0,23  | 1,17   | 0,44670 | NM_003633              | FAM150A     |
| 8150751 | 0,00 | 1,00 | 0,99626 | -0,49 | -1,40  | 0,11238 | NM_207413              | ZNF225      |
| 8029385 | 0,00 | 1,00 | 0,99795 | 0,68  | 1,61   | 0,14425 | NM_013362              | ZNF229      |



|                        |       |       |         |       |       |         |                           |                        |
|------------------------|-------|-------|---------|-------|-------|---------|---------------------------|------------------------|
| 8037467                | 0,00  | 1,00  | 0,99913 | 0,63  | 1,55  | 0,07105 | NM_014518                 | RPS7 // RPS7 // RPS7   |
| // RPS7                |       |       |         |       |       |         |                           |                        |
| 8005877                | 0,00  | 1,00  | 0,99955 | 1,54  | 2,91  | 0,00685 | NM_001011 // NM_001011 // |                        |
| NM_001011 // NM_001011 |       |       | MCM9    |       |       |         |                           |                        |
| 8129218                | 0,00  | -1,00 | 0,99960 | 0,71  | 1,64  | 0,11248 | NM_153255                 | HSPBP1                 |
| 8090030                | 0,00  | -1,00 | 0,99939 | -0,27 | -1,20 | 0,23421 | NM_024610                 | SHISA9                 |
| 7993296                | 0,00  | -1,00 | 0,99973 | -1,35 | -2,55 | 0,00319 | NM_001145204              | ---                    |
| 7927527                | 0,00  | -1,00 | 0,99933 | 0,22  | 1,16  | 0,38786 | ---                       | ---                    |
| 7933593                | 0,00  | -1,00 | 0,99933 | 0,22  | 1,16  | 0,38786 | ---                       | SOHLH2                 |
| 7970975                | 0,00  | -1,00 | 0,99789 | 0,75  | 1,69  | 0,04288 | NM_017826                 | RCC1                   |
| 7899462                | 0,00  | -1,00 | 0,99706 | 1,72  | 3,29  | 0,00400 | NM_001048194              | PCYOX1L                |
| 8109149                | 0,00  | -1,00 | 0,99655 | 2,33  | 5,03  | 0,03074 | NM_024028                 | LOC100128816           |
| 7960362                | 0,00  | -1,00 | 0,99819 | 0,08  | 1,06  | 0,78236 | AY358109                  | MGAT1                  |
| 8116484                | 0,00  | -1,00 | 0,99768 | -0,16 | -1,12 | 0,73857 | NM_001114618              | DEFB121                |
| 8065563                | 0,00  | -1,00 | 0,99597 | -0,85 | -1,80 | 0,00861 | NM_001011878              | RCBTB2                 |
| 7971573                | 0,00  | -1,00 | 0,99384 | 0,05  | 1,04  | 0,67300 | NM_001268                 | ---                    |
| 8050225                | 0,00  | -1,00 | 0,99057 | -0,87 | -1,83 | 0,00892 | ---                       | CRLS1                  |
| 8060839                | 0,00  | -1,00 | 0,99594 | 0,50  | 1,42  | 0,10347 | NM_019095                 | RPL34                  |
| 8096765                | 0,00  | -1,00 | 0,99688 | 0,46  | 1,37  | 0,25147 | NM_033625                 | SLC48A1                |
| 7955055                | 0,00  | -1,00 | 0,99488 | 1,21  | 2,32  | 0,12441 | NM_017842                 | TSPYL1                 |
| 8129097                | 0,00  | -1,00 | 0,99627 | -0,50 | -1,41 | 0,09557 | NM_003309                 | HEATR3                 |
| 7995456                | 0,00  | -1,00 | 0,98510 | 0,42  | 1,34  | 0,32911 | NM_182922                 | TASP1                  |
| 8065018                | 0,00  | -1,00 | 0,98838 | 1,22  | 2,32  | 0,00383 | NM_017714                 | ---                    |
| 8171180                | 0,00  | -1,00 | 0,99229 | -0,52 | -1,43 | 0,35210 | ---                       | DHX16                  |
| 8178377                | 0,00  | -1,00 | 0,99034 | 2,86  | 7,25  | 0,00048 | NM_003587                 | GNL3L                  |
| 8167797                | 0,00  | -1,00 | 0,99333 | 1,81  | 3,51  | 0,00039 | NM_019067                 | CNPY2                  |
| 7964076                | 0,00  | -1,00 | 0,99362 | 1,50  | 2,82  | 0,00785 | NM_014255                 | CHST12                 |
| 8131135                | 0,00  | -1,00 | 0,99471 | -0,35 | -1,27 | 0,47311 | NM_018641                 | FAU                    |
| 7949377                | 0,00  | -1,00 | 0,99054 | 0,46  | 1,38  | 0,18214 | NM_001997                 | GOLGA6L1               |
| 7986598                | 0,00  | -1,00 | 0,99615 | -1,53 | -2,88 | 0,01741 | NM_001001413              | ---                    |
| 8119196                | 0,00  | -1,00 | 0,98803 | -0,07 | -1,05 | 0,43542 | ---                       | TMEM216                |
| 7940479                | 0,00  | -1,00 | 0,99364 | 1,90  | 3,72  | 0,00010 | NM_016499                 | FAM83D                 |
| 8062571                | 0,00  | -1,00 | 0,99015 | 1,65  | 3,14  | 0,07317 | NM_030919                 | C1orf189               |
| 7920487                | 0,00  | -1,00 | 0,98564 | -0,65 | -1,57 | 0,21994 | BC127710                  | FBXO31                 |
| 8003249                | -0,01 | -1,00 | 0,98292 | 0,47  | 1,38  | 0,22850 | NM_024735                 | PHLDB1                 |
| 7944302                | -0,01 | -1,00 | 0,98768 | 0,93  | 1,91  | 0,06206 | NM_015157                 | ATF7IP2                |
| 7993167                | -0,01 | -1,00 | 0,97645 | 0,37  | 1,29  | 0,13657 | NM_024997                 | SPSB1                  |
| 7897449                | -0,01 | -1,00 | 0,98300 | 0,63  | 1,55  | 0,13930 | NM_025106                 | HMBS                   |
| 7944401                | -0,01 | -1,00 | 0,98586 | 1,87  | 3,65  | 0,10364 | NM_000190                 | KIAA1841               |
| 8042168                | -0,01 | -1,00 | 0,98181 | 1,30  | 2,47  | 0,03399 | NM_001129993              | FBXO4                  |
| 8105111                | -0,01 | -1,00 | 0,98418 | 1,73  | 3,33  | 0,01430 | NM_012176                 | COL8A1                 |
| 8081235                | -0,01 | -1,00 | 0,96479 | -0,85 | -1,80 | 0,00300 | NM_001850                 | ---                    |
| 7901858                | -0,01 | -1,00 | 0,98703 | -0,65 | -1,57 | 0,02975 | ---                       | LOC646214 // LOC646214 |
| 7986603                | -0,01 | -1,00 | 0,97845 | 0,65  | 1,57  | 0,16775 | NR_027053 // NR_027053    | MID1IP1                |
| 8166797                | -0,01 | -1,00 | 0,99180 | 2,50  | 5,65  | 0,00767 | NM_021242                 | EXTL3                  |
| 8145624                | -0,01 | -1,00 | 0,98830 | 1,69  | 3,22  | 0,00485 | NM_001440                 | YPEL1                  |
| 8074780                | -0,01 | -1,00 | 0,98680 | 1,58  | 2,98  | 0,01114 | NM_013313                 | ERV3                   |
| 8139840                | -0,01 | -1,00 | 0,98257 | 2,02  | 4,05  | 0,00133 | NM_001007253              | LOC402644              |
| 8138797                | -0,01 | -1,00 | 0,97682 | -0,39 | -1,31 | 0,32326 | NM_001126493              | KIF21A                 |
| 7962274                | -0,01 | -1,00 | 0,98165 | 2,70  | 6,50  | 0,00124 | NM_001173464              | ARID1B                 |
| 8122971                | -0,01 | -1,00 | 0,99063 | 0,98  | 1,97  | 0,04000 | NM_020732                 | SFRS16                 |
| 8029592                | -0,01 | -1,00 | 0,97640 | 0,61  | 1,52  | 0,01950 | NM_007056                 | HPS4                   |
| 8075063                | -0,01 | -1,01 | 0,99282 | 1,86  | 3,62  | 0,00583 | NM_022081                 | MCTP2                  |
| 7986293                | -0,01 | -1,01 | 0,98039 | 4,19  | 18,22 | 0,00006 | NM_018349                 | ---                    |
| 7971294                | -0,01 | -1,01 | 0,97818 | -1,11 | -2,15 | 0,00042 | ---                       | PRKRIP1                |
| 8135162                | -0,01 | -1,01 | 0,98276 | 0,98  | 1,97  | 0,01117 | NM_024653                 | NIF3L1                 |
| 8047356                | -0,01 | -1,01 | 0,97963 | 2,26  | 4,77  | 0,00013 | NM_021824                 | ZNF542                 |
| 8031632                | -0,01 | -1,01 | 0,96165 | 0,82  | 1,77  | 0,05054 | NR_033418                 | ZNF221                 |
| 8029331                | -0,01 | -1,01 | 0,97210 | 0,24  | 1,18  | 0,47408 | NM_013359                 | ---                    |
| 8091861                | -0,01 | -1,01 | 0,97055 | -0,81 | -1,75 | 0,02998 | ---                       | SLC25A19               |
| 8018352                | -0,01 | -1,01 | 0,97437 | 1,42  | 2,68  | 0,00422 | NM_001126121              | ---                    |
| 8068494                | -0,01 | -1,01 | 0,96966 | -0,48 | -1,40 | 0,50051 | ---                       | LMNB1                  |
| 8107706                | -0,01 | -1,01 | 0,98762 | 1,90  | 3,72  | 0,00104 | NM_005573                 | TBCD                   |
| 8010848                | -0,01 | -1,01 | 0,97070 | 1,43  | 2,70  | 0,03114 | NM_005993                 | ZNF322A                |
| 8162669                | -0,01 | -1,01 | 0,97044 | -0,11 | -1,08 | 0,69051 | NM_024639                 | WFDC11                 |
| 8066569                | -0,01 | -1,01 | 0,96301 | -0,25 | -1,19 | 0,07924 | NM_147197                 | PPIAL4A                |
| 7919407                | -0,01 | -1,01 | 0,98863 | -1,41 | -2,66 | 0,00157 | NM_178230                 | SCN2A                  |
| 8046020                | -0,01 | -1,01 | 0,98189 | -1,19 | -2,29 | 0,00216 | NM_021007                 | C7orf34                |
| 8136832                | -0,01 | -1,01 | 0,96278 | -0,64 | -1,56 | 0,03702 | NM_178829                 | DTX2                   |
| 8133736                | -0,01 | -1,01 | 0,98521 | 0,32  | 1,25  | 0,31843 | NM_020892                 | C17orf57               |
| 8007949                | -0,01 | -1,01 | 0,97623 | 0,00  | -1,00 | 0,99377 | NM_152347                 | PCK2                   |
| 7973530                | -0,01 | -1,01 | 0,97889 | 1,43  | 2,69  | 0,03989 | NM_004563                 | SNAPC5                 |
| 7989924                | -0,01 | -1,01 | 0,97903 | 1,89  | 3,71  | 0,00612 | NM_006049                 | SRY                    |

|         |       |       |         |       |       |         |              |           |
|---------|-------|-------|---------|-------|-------|---------|--------------|-----------|
| 8177038 | -0,01 | -1,01 | 0,97650 | -1,57 | -2,96 | 0,01179 | NM_003140    | CDCA4     |
| 7981525 | -0,01 | -1,01 | 0,96834 | 2,20  | 4,59  | 0,00482 | NM_017955    | HYAL3     |
| 8087596 | -0,01 | -1,01 | 0,85042 | 1,36  | 2,56  | 0,00546 | NM_003549    | RALGAPA1  |
| 7978653 | -0,01 | -1,01 | 0,98557 | 3,03  | 8,18  | 0,02244 | NM_014990    | NOL12     |
| 8072883 | -0,01 | -1,01 | 0,96262 | 1,52  | 2,87  | 0,00043 | NM_024313    | FAM60A    |
| 7962146 | -0,01 | -1,01 | 0,98628 | 3,08  | 8,45  | 0,00242 | NM_001135811 | CTRL      |
| 8002121 | -0,01 | -1,01 | 0,97435 | -1,46 | -2,76 | 0,00533 | NM_001907    | ERCC8     |
| 8112285 | -0,01 | -1,01 | 0,95004 | 0,02  | 1,01  | 0,96578 | NM_000082    | LOC338799 |
| 7967210 | -0,01 | -1,01 | 0,95167 | 0,84  | 1,79  | 0,03808 | NR_002809    | DCI       |
| 7998762 | -0,01 | -1,01 | 0,97924 | 1,98  | 3,95  | 0,00104 | NM_001919    | ---       |
| 8116593 | -0,01 | -1,01 | 0,97596 | -0,38 | -1,30 | 0,43732 | ---          | PCNXL2    |
| 7925089 | -0,01 | -1,01 | 0,94402 | 1,20  | 2,29  | 0,01499 | NM_014801    | CHRM4     |
| 7947649 | -0,01 | -1,01 | 0,95768 | 0,04  | 1,03  | 0,88867 | NM_000741    | ITPRIP    |
| 7936242 | -0,01 | -1,01 | 0,96913 | 0,58  | 1,50  | 0,17114 | NM_033397    | PTK2B     |
| 8145490 | -0,01 | -1,01 | 0,96641 | 0,30  | 1,23  | 0,56153 | NM_173174    | LRRC8B    |
| 7902861 | -0,01 | -1,01 | 0,95959 | 0,55  | 1,47  | 0,17549 | NM_001134476 | C19orf12  |
| 8035886 | -0,01 | -1,01 | 0,85252 | 0,82  | 1,77  | 0,07040 | NM_031448    | NLRX1     |
| 7944463 | -0,01 | -1,01 | 0,97282 | 1,22  | 2,33  | 0,14783 | NM_024618    | ---       |
| 7923972 | -0,01 | -1,01 | 0,97056 | -1,19 | -2,28 | 0,00165 | ---          | ---       |
| 8114111 | -0,01 | -1,01 | 0,99161 | -1,23 | -2,34 | 0,03129 | ---          | QPCT      |
| 8041508 | -0,01 | -1,01 | 0,97846 | -0,23 | -1,17 | 0,05422 | NM_012413    | CYP11B2   |
| 8153373 | -0,01 | -1,01 | 0,96411 | -0,64 | -1,56 | 0,03549 | NM_000498    | ---       |
| 8114006 | -0,01 | -1,01 | 0,98062 | -0,03 | -1,02 | 0,91357 | ---          | SPACA5    |
| 8167210 | -0,01 | -1,01 | 0,97116 | -0,58 | -1,49 | 0,14111 | NM_205856    | GLDN      |
| 7983704 | -0,01 | -1,01 | 0,97131 | -0,78 | -1,72 | 0,08754 | NM_181789    | NCAPG2    |
| 8144153 | -0,01 | -1,01 | 0,94717 | 2,29  | 4,88  | 0,00013 | NM_017760    | ZFYVE21   |
| 7977149 | -0,01 | -1,01 | 0,96779 | 1,73  | 3,31  | 0,04733 | NM_024071    | ABAT      |
| 7993126 | -0,01 | -1,01 | 0,95400 | 0,05  | 1,03  | 0,76990 | NM_020686    | WDTC1     |
| 7899289 | -0,01 | -1,01 | 0,98229 | 2,54  | 5,84  | 0,01191 | NM_015023    | ZNF182    |
| 8172369 | -0,01 | -1,01 | 0,97091 | 0,08  | 1,06  | 0,84619 | NM_006962    | ANO3      |
| 7939024 | -0,02 | -1,01 | 0,92898 | -0,89 | -1,85 | 0,00717 | NM_031418    | GORASP1   |
| 8086317 | -0,02 | -1,01 | 0,96775 | 0,96  | 1,94  | 0,10400 | NM_031899    | FAM108B1  |
| 8161727 | -0,02 | -1,01 | 0,89857 | 0,80  | 1,74  | 0,00711 | NM_016014    | C5orf35   |
| 8105456 | -0,02 | -1,01 | 0,96570 | 0,03  | 1,02  | 0,93632 | NM_153706    | TRIM49L   |
| 7943025 | -0,02 | -1,01 | 0,97411 | -1,83 | -3,55 | 0,00363 | NM_001105522 | TRIM49L   |
| 7950971 | -0,02 | -1,01 | 0,97411 | -1,83 | -3,55 | 0,00363 | NM_001105522 | ---       |
| 7977435 | -0,02 | -1,01 | 0,98199 | -1,18 | -2,27 | 0,03841 | ---          | SRGAP3    |
| 8085164 | -0,02 | -1,01 | 0,93078 | -0,29 | -1,23 | 0,10629 | NM_014850    | CRYGN     |
| 8143949 | -0,02 | -1,01 | 0,96523 | -1,25 | -2,37 | 0,05497 | NM_144727    | POP7      |
| 8134904 | -0,02 | -1,01 | 0,96156 | 0,81  | 1,75  | 0,01950 | NM_005837    | SFRS2     |
| 8018803 | -0,02 | -1,01 | 0,96460 | 2,08  | 4,23  | 0,00377 | NM_003016    | C4orf23   |
| 8094070 | -0,02 | -1,01 | 0,91167 | 0,68  | 1,61  | 0,01673 | NM_152544    | OR8G5     |
| 7944838 | -0,02 | -1,01 | 0,91604 | -0,97 | -1,96 | 0,03764 | NM_001005198 | ZNF250    |
| 8153920 | -0,02 | -1,01 | 0,96935 | 1,90  | 3,73  | 0,01439 | NM_021061    | PAK3      |
| 8169389 | -0,02 | -1,01 | 0,95758 | -0,85 | -1,80 | 0,11511 | NM_002578    | SNORD36B  |
| 8159006 | -0,02 | -1,01 | 0,89649 | -0,33 | -1,25 | 0,17666 | NR_000017    | ZUFSP     |
| 8129108 | -0,02 | -1,01 | 0,93761 | 0,46  | 1,37  | 0,19080 | NM_145062    | ---       |
| 8108192 | -0,02 | -1,01 | 0,95420 | -0,86 | -1,82 | 0,14925 | ---          | ZNF860    |
| 8078380 | -0,02 | -1,01 | 0,96620 | 0,25  | 1,19  | 0,47720 | NM_001137674 | MXD4      |
| 8098995 | -0,02 | -1,01 | 0,96927 | 0,40  | 1,32  | 0,36345 | NM_006454    | LSM6      |
| 8097679 | -0,02 | -1,01 | 0,91291 | 1,48  | 2,79  | 0,01909 | NM_007080    | GRHPR     |
| 8155250 | -0,02 | -1,01 | 0,91197 | 1,38  | 2,61  | 0,01668 | NM_012203    | MRPL55    |
| 7924853 | -0,02 | -1,01 | 0,94967 | 0,59  | 1,50  | 0,08888 | NM_181462    | BRIP1     |
| 8017262 | -0,02 | -1,01 | 0,96634 | 2,04  | 4,10  | 0,01559 | NM_032043    | IL41      |
| 8038487 | -0,02 | -1,01 | 0,96203 | -0,02 | -1,01 | 0,92521 | NM_172374    | FOXM1     |
| 7960340 | -0,02 | -1,01 | 0,97418 | 1,53  | 2,89  | 0,00352 | NM_202002    | TAS2R4    |
| 8136645 | -0,02 | -1,01 | 0,85119 | -0,28 | -1,22 | 0,09090 | NM_016944    | C16orf58  |
| 8001048 | -0,02 | -1,01 | 0,90210 | -0,29 | -1,22 | 0,73199 | NM_022744    | VIT       |
| 8041467 | -0,02 | -1,01 | 0,90326 | -0,42 | -1,34 | 0,11383 | NM_053276    | EWSR1     |
| 8072206 | -0,02 | -1,01 | 0,92871 | -0,34 | -1,26 | 0,23040 | NM_013986    | ZFP161    |
| 8022110 | -0,02 | -1,01 | 0,96454 | 1,77  | 3,42  | 0,00030 | NM_001143823 | SESN2     |
| 7899436 | -0,02 | -1,01 | 0,95209 | 1,24  | 2,36  | 0,06783 | NM_031459    | MTRF1     |
| 7971222 | -0,02 | -1,01 | 0,93615 | 1,02  | 2,02  | 0,00067 | NM_004294    | FANCB     |
| 8171381 | -0,02 | -1,01 | 0,95437 | 0,91  | 1,88  | 0,05386 | NM_001018113 | FABP7     |
| 8121784 | -0,02 | -1,01 | 0,95395 | -1,13 | -2,20 | 0,05921 | NM_001446    | UGT2A3    |
| 8095402 | -0,02 | -1,01 | 0,87861 | -0,78 | -1,72 | 0,22030 | NM_024743    | FGG       |
| 8103326 | -0,02 | -1,01 | 0,94315 | -0,25 | -1,19 | 0,03592 | NM_021870    | ---       |
| 7965036 | -0,02 | -1,01 | 0,95923 | 1,15  | 2,22  | 0,08712 | ---          | ---       |
| 8072582 | -0,02 | -1,01 | 0,92501 | -0,74 | -1,67 | 0,14521 | ---          | SRCAP     |
| 7994889 | -0,02 | -1,01 | 0,92084 | 2,61  | 6,09  | 0,00131 | NM_006662    | MIR107    |
| 7934959 | -0,02 | -1,01 | 0,92596 | 0,03  | 1,02  | 0,76044 | NR_029524    | ---       |
| 7993451 | -0,02 | -1,01 | 0,97895 | 0,49  | 1,41  | 0,13433 | ---          | ---       |
| 7993586 | -0,02 | -1,01 | 0,97895 | 0,49  | 1,41  | 0,13433 | ---          | ---       |

|         |       |       |         |       |       |         |                 |          |           |
|---------|-------|-------|---------|-------|-------|---------|-----------------|----------|-----------|
| 7999594 | -0,02 | -1,01 | 0,97895 | 0,49  | 1,41  | 0,13433 | ---             | ---      |           |
| 7999750 | -0,02 | -1,01 | 0,97895 | 0,49  | 1,41  | 0,13433 | ---             | ETF1     |           |
| 8114443 | -0,02 | -1,01 | 0,97818 | 1,46  | 2,75  | 0,02445 | NM_004730       |          | IFNA16    |
| 8160392 | -0,02 | -1,02 | 0,94563 | -0,10 | -1,07 | 0,71834 | NM_002173       |          | LOC441016 |
| 8095072 | -0,02 | -1,02 | 0,91472 | -0,30 | -1,23 | 0,30329 | ENST00000312008 |          | GOLGA8B   |
| 7987248 | -0,02 | -1,02 | 0,91722 | 0,92  | 1,90  | 0,00692 | NR_027410       |          | FAM74A3   |
| 8155354 | -0,02 | -1,02 | 0,95275 | -1,47 | -2,77 | 0,00609 | ENST00000377629 |          | ADPGK     |
| 7990231 | -0,02 | -1,02 | 0,97009 | 1,14  | 2,20  | 0,10304 | NR_023318       |          | SSX6      |
| 8167220 | -0,02 | -1,02 | 0,92881 | -0,45 | -1,37 | 0,32146 | NR_028366       |          | PRO3077   |
| 7932552 | -0,02 | -1,02 | 0,95510 | -0,45 | -1,37 | 0,04148 | ENST00000451889 |          | COL4A1    |
| 7972750 | -0,02 | -1,02 | 0,89584 | -0,38 | -1,30 | 0,04786 | NM_001845       |          | DGKB      |
| 8138310 | -0,02 | -1,02 | 0,91829 | -0,98 | -1,97 | 0,03199 | NM_004080       |          | C14orf37  |
| 7979400 | -0,02 | -1,02 | 0,95300 | -0,69 | -1,61 | 0,00409 | AK292513 C2CD2  |          |           |
| 8070538 | -0,02 | -1,02 | 0,93378 | 0,77  | 1,70  | 0,22757 | NM_015500       |          | JPH1      |
| 8151423 | -0,02 | -1,02 | 0,93775 | 1,67  | 3,19  | 0,00163 | NM_020647       |          | IRAK1BP1  |
| 8120826 | -0,02 | -1,02 | 0,97100 | 1,19  | 2,29  | 0,01340 | NM_001010844    |          | FASTK     |
| 8143863 | -0,02 | -1,02 | 0,96740 | 1,66  | 3,16  | 0,05937 | NM_006712       |          | DSEGR1    |
| 8154128 | -0,02 | -1,02 | 0,93544 | -0,44 | -1,35 | 0,02911 | DQ246450        |          | HS3ST3B1  |
| 8005097 | -0,02 | -1,02 | 0,94426 | -1,54 | -2,90 | 0,00076 | NM_006041       |          | KRTAP5-4  |
| 7945657 | -0,02 | -1,02 | 0,97501 | -1,09 | -2,13 | 0,24962 | NM_001012709    |          | ARSD      |
| 8171148 | -0,02 | -1,02 | 0,95985 | -1,27 | -2,42 | 0,01463 | NM_001669       |          | PSKH1     |
| 7996720 | -0,03 | -1,02 | 0,88762 | 0,02  | 1,01  | 0,97187 | NM_006742       |          | ---       |
| 8148619 | -0,03 | -1,02 | 0,98227 | -1,55 | -2,92 | 0,05791 | ---             | NDUFC1   |           |
| 8102839 | -0,03 | -1,02 | 0,85437 | 0,53  | 1,44  | 0,02522 | NM_002494       |          | OR13C5    |
| 8162934 | -0,03 | -1,02 | 0,94824 | -0,58 | -1,49 | 0,05092 | NM_001004482    |          | ---       |
| 8166569 | -0,03 | -1,02 | 0,97555 | -0,96 | -1,95 | 0,08277 | ---             | C16orf57 |           |
| 7996174 | -0,03 | -1,02 | 0,91888 | 0,99  | 1,99  | 0,07433 | NM_024598       |          | ZNF90     |
| 8027258 | -0,03 | -1,02 | 0,92564 | 0,78  | 1,72  | 0,16213 | AK298173 MAVS   |          |           |
| 8060705 | -0,03 | -1,02 | 0,92383 | 0,40  | 1,32  | 0,25425 | NM_020746       |          | TPCN2     |
| 7942091 | -0,03 | -1,02 | 0,83597 | 0,36  | 1,28  | 0,40195 | NM_139075       |          | IFT27     |
| 8075828 | -0,03 | -1,02 | 0,93407 | 1,72  | 3,29  | 0,00566 | NM_001177701    |          | CCL20     |
| 8048864 | -0,03 | -1,02 | 0,86570 | 0,36  | 1,28  | 0,31664 | NM_004591       |          | NPRL2     |
| 8087669 | -0,03 | -1,02 | 0,92376 | 1,80  | 3,49  | 0,00078 | NM_006545       |          | ---       |
| 8166824 | -0,03 | -1,02 | 0,84373 | -0,68 | -1,61 | 0,03484 | ---             | DOT1L    |           |
| 8024391 | -0,03 | -1,02 | 0,94932 | 0,61  | 1,52  | 0,20730 | NM_032482       |          | DEM1      |
| 7900454 | -0,03 | -1,02 | 0,94536 | 0,02  | 1,02  | 0,94818 | NM_022774       |          | ---       |
| 8117018 | -0,03 | -1,02 | 0,97115 | -1,55 | -2,93 | 0,02611 | ---             | WFS1     |           |
| 8093906 | -0,03 | -1,02 | 0,93086 | 0,91  | 1,88  | 0,29398 | NM_006005       |          | PGBD1     |
| 8117675 | -0,03 | -1,02 | 0,84819 | 0,18  | 1,14  | 0,47818 | NM_032507       |          | ZNF133    |
| 8061154 | -0,03 | -1,02 | 0,87432 | 0,48  | 1,39  | 0,21764 | NM_003434       |          | SPANXN5   |
| 8172800 | -0,03 | -1,02 | 0,93504 | -1,19 | -2,29 | 0,00755 | NM_001009616    |          | SPACA5    |
| 8167228 | -0,03 | -1,02 | 0,94933 | -0,77 | -1,71 | 0,20155 | NM_205856       |          | PAFAH2    |
| 7913883 | -0,03 | -1,02 | 0,90978 | 0,82  | 1,77  | 0,11961 | NM_000437       |          | MECP2     |
| 8175998 | -0,03 | -1,02 | 0,94835 | 1,88  | 3,67  | 0,00299 | NM_004992       |          | MAP3K13   |
| 8084589 | -0,03 | -1,02 | 0,91559 | 0,20  | 1,15  | 0,38710 | NM_004721       |          | ---       |
| 7910948 | -0,03 | -1,02 | 0,96866 | -2,25 | -4,76 | 0,15569 | ---             | ---      |           |
| 8065756 | -0,03 | -1,02 | 0,76854 | 0,49  | 1,41  | 0,13893 | ---             | CYP3A4   |           |
| 8141317 | -0,03 | -1,02 | 0,93688 | -1,21 | -2,32 | 0,00211 | NM_017460       |          | KCNMB4    |
| 7957126 | -0,03 | -1,02 | 0,84075 | 0,97  | 1,96  | 0,01476 | NM_014505       |          | SNORA33   |
| 8122144 | -0,03 | -1,02 | 0,87835 | -1,43 | -2,70 | 0,03329 | NR_002436       |          | UPK2      |
| 7944341 | -0,03 | -1,02 | 0,94676 | -0,21 | -1,15 | 0,18557 | NM_006760       |          | PDGFA     |
| 8137670 | -0,03 | -1,02 | 0,87237 | 2,77  | 6,84  | 0,00013 | NM_002607       |          | ASB1      |
| 8049657 | -0,03 | -1,02 | 0,92079 | 1,68  | 3,21  | 0,00034 | NM_001040445    |          | ---       |
| 8142448 | -0,03 | -1,02 | 0,84703 | -0,70 | -1,63 | 0,00187 | ---             | CDADC1   |           |
| 7969096 | -0,03 | -1,02 | 0,94940 | 0,62  | 1,54  | 0,08878 | NM_030911       |          | ZNF385D   |
| 8085774 | -0,03 | -1,02 | 0,93692 | -0,89 | -1,86 | 0,00889 | NM_024697       |          | OR9A4     |
| 8136660 | -0,03 | -1,02 | 0,91125 | -0,84 | -1,79 | 0,01358 | NM_001001656    |          | ---       |
| 8080960 | -0,03 | -1,02 | 0,80823 | -0,46 | -1,37 | 0,14577 | ---             | DENND2C  |           |
| 7918751 | -0,03 | -1,02 | 0,85106 | -0,26 | -1,20 | 0,08893 | BC063894 RNASE6 |          |           |
| 7973101 | -0,03 | -1,02 | 0,89287 | -0,90 | -1,86 | 0,03595 | NM_005615       |          | ---       |
| 8023935 | -0,03 | -1,02 | 0,94383 | -1,34 | -2,54 | 0,00367 | ---             | WNT5A    |           |
| 8088180 | -0,03 | -1,02 | 0,91754 | -0,32 | -1,24 | 0,08345 | NM_003392       |          | ZNF324B   |
| 8031949 | -0,03 | -1,02 | 0,77562 | -0,34 | -1,26 | 0,06422 | NM_207395       |          | ---       |
| 7985039 | -0,03 | -1,02 | 0,96651 | -1,23 | -2,34 | 0,23258 | ---             | OR52E2   |           |
| 7946019 | -0,03 | -1,02 | 0,80448 | -0,91 | -1,88 | 0,01826 | NM_001005164    |          | SLITRK6   |
| 7972239 | -0,03 | -1,02 | 0,87201 | -0,35 | -1,28 | 0,03448 | NM_032229       |          | ARPC5L    |
| 8157828 | -0,03 | -1,02 | 0,84047 | 2,33  | 5,02  | 0,00161 | NM_030978       |          | EGFL6     |
| 8166079 | -0,03 | -1,02 | 0,88447 | -0,34 | -1,27 | 0,17342 | NM_015507       |          | DDX39     |
| 8034806 | -0,04 | -1,02 | 0,88462 | 0,96  | 1,95  | 0,01084 | NM_005804       |          | ---       |
| 8169634 | -0,04 | -1,02 | 0,96610 | -2,67 | -6,37 | 0,01726 | ---             | SLC37A1  |           |
| 8068810 | -0,04 | -1,02 | 0,87118 | 3,50  | 11,31 | 0,00081 | NM_018964       |          | C6orf57   |
| 8120579 | -0,04 | -1,02 | 0,83063 | -0,18 | -1,13 | 0,54459 | NM_145267       |          | TBC1D8    |
| 8054308 | -0,04 | -1,03 | 0,93951 | 2,51  | 5,70  | 0,00120 | NM_001102426    |          | GAK       |

|         |       |       |         |       |        |         |                 |              |
|---------|-------|-------|---------|-------|--------|---------|-----------------|--------------|
| 8098789 | -0,04 | -1,03 | 0,92625 | 1,26  | 2,39   | 0,02986 | NM_005255       | ---          |
| 8173206 | -0,04 | -1,03 | 0,96196 | 0,88  | 1,84   | 0,04688 | ---             | OR6X1        |
| 7952373 | -0,04 | -1,03 | 0,93165 | -1,65 | -3,14  | 0,03764 | NM_001005188    | SLC6A8       |
| 7995292 | -0,04 | -1,03 | 0,87359 | 1,14  | 2,21   | 0,05958 | NM_005629       | GOLGA8B      |
| 7987279 | -0,04 | -1,03 | 0,77834 | 1,01  | 2,02   | 0,01041 | NR_027410       | ATP6V0D2     |
| 8147145 | -0,04 | -1,03 | 0,85041 | -0,05 | -1,04  | 0,84060 | NM_152565       | ---          |
| 8044530 | -0,04 | -1,03 | 0,77486 | -0,17 | -1,12  | 0,49629 | ---             | PALM         |
| 8024003 | -0,04 | -1,03 | 0,78831 | 0,34  | 1,26   | 0,44150 | NM_002579       | MIR195       |
| 8012004 | -0,04 | -1,03 | 0,84747 | -0,65 | -1,57  | 0,27501 | NR_029712       | MPHOSPH6     |
| 8003068 | -0,04 | -1,03 | 0,90808 | 0,10  | 1,07   | 0,48502 | NM_005792       | SAMD13       |
| 7902617 | -0,04 | -1,03 | 0,70938 | -0,76 | -1,69  | 0,01825 | NM_001010971    | GATA2        |
| 8090469 | -0,04 | -1,03 | 0,95523 | -0,13 | -1,09  | 0,19243 | NM_032638       | ARHGFE11     |
| 7921179 | -0,04 | -1,03 | 0,91428 | 2,61  | 6,12   | 0,00045 | NM_198236       | C17orf81     |
| 8004293 | -0,04 | -1,03 | 0,79780 | 2,64  | 6,25   | 0,00220 | NM_203413       | THRAP3       |
| 7900119 | -0,04 | -1,03 | 0,92949 | 2,36  | 5,13   | 0,01714 | NM_005119       | ---          |
| 8144226 | -0,04 | -1,03 | 0,91980 | 0,10  | 1,07   | 0,50717 | ---             | MIR214       |
| 7922326 | -0,04 | -1,03 | 0,95992 | -1,04 | -2,06  | 0,00120 | NR_029627       | TRIM35       |
| 8149907 | -0,04 | -1,03 | 0,92750 | 0,29  | 1,23   | 0,55308 | NM_171982       | MT1JP        |
| 7995803 | -0,04 | -1,03 | 0,94853 | -0,06 | -1,04  | 0,81347 | AF348994        | ACVRL1       |
| 7955562 | -0,04 | -1,03 | 0,71488 | -0,87 | -1,82  | 0,04834 | NM_000020       | KCND2        |
| 8135705 | -0,04 | -1,03 | 0,88650 | -0,76 | -1,69  | 0,00343 | NM_012281       | PPM1L        |
| 8083749 | -0,04 | -1,03 | 0,86970 | 0,04  | 1,03   | 0,87597 | NM_139245       | ---          |
| 7974619 | -0,04 | -1,03 | 0,74540 | -0,69 | -1,62  | 0,00805 | ---             | PPM1E        |
| 8008768 | -0,04 | -1,03 | 0,89137 | 0,99  | 1,99   | 0,02781 | NM_014906       | ZNF71        |
| 8031675 | -0,04 | -1,03 | 0,89753 | 0,98  | 1,98   | 0,12971 | NM_021216       | FAM71A       |
| 7909624 | -0,04 | -1,03 | 0,90255 | -0,83 | -1,78  | 0,00086 | NM_153606       | ---          |
| 7908777 | -0,04 | -1,03 | 0,94544 | 2,24  | 4,74   | 0,00948 | ---             | SCGB2A1      |
| 7940626 | -0,04 | -1,03 | 0,86851 | -0,45 | -1,37  | 0,23930 | NM_002407       | SLC26A6      |
| 8087119 | -0,04 | -1,03 | 0,89403 | 1,24  | 2,36   | 0,17480 | NM_022911       | KIAA1919     |
| 8121525 | -0,04 | -1,03 | 0,88349 | 1,33  | 2,52   | 0,00261 | NM_153369       | LOC100293211 |
| 7981728 | -0,04 | -1,03 | 0,97978 | -4,84 | -28,58 | 0,00016 | ENST00000390601 | ATRNL1       |
| 7930714 | -0,04 | -1,03 | 0,47800 | -0,08 | -1,06  | 0,66321 | NM_207303       | AIM1         |
| 8121277 | -0,04 | -1,03 | 0,85968 | 1,50  | 2,83   | 0,00216 | NM_001624       | MC1R         |
| 7998055 | -0,04 | -1,03 | 0,94072 | -0,13 | -1,10  | 0,84978 | NM_002386       | OR5AK3P      |
| 7939998 | -0,04 | -1,03 | 0,92530 | -1,06 | -2,08  | 0,04100 | ENST00000326876 | CXCL1        |
| 8095697 | -0,04 | -1,03 | 0,90801 | 1,17  | 2,24   | 0,04792 | NM_001511       | C5orf54      |
| 8115600 | -0,04 | -1,03 | 0,83470 | 0,28  | 1,22   | 0,38491 | NM_022090       | NFKBIB       |
| 8028552 | -0,04 | -1,03 | 0,88503 | 0,87  | 1,83   | 0,01565 | NM_002503       | DIP2C        |
| 7931683 | -0,04 | -1,03 | 0,90163 | 1,13  | 2,18   | 0,01840 | NM_014974       | MNT          |
| 8011262 | -0,04 | -1,03 | 0,88086 | 1,02  | 2,03   | 0,05822 | NM_020310       | GPRASP1      |
| 8168968 | -0,04 | -1,03 | 0,88750 | -0,05 | -1,03  | 0,87949 | NM_014710       | C6orf94      |
| 8122452 | -0,04 | -1,03 | 0,90737 | -2,24 | -4,71  | 0,00512 | NM_001013623    | SAE1         |
| 8029884 | -0,04 | -1,03 | 0,93178 | 0,91  | 1,88   | 0,16691 | NR_027280       | DNALI1       |
| 7900159 | -0,04 | -1,03 | 0,93600 | -1,76 | -3,39  | 0,00027 | NM_003462       | MBD6         |
| 7956470 | -0,04 | -1,03 | 0,90721 | 1,38  | 2,59   | 0,00231 | NM_052897       | OFD1         |
| 8166104 | -0,04 | -1,03 | 0,79293 | 0,95  | 1,93   | 0,02379 | NM_003611       | FAM74A3      |
| 8161467 | -0,04 | -1,03 | 0,91785 | -1,37 | -2,58  | 0,00164 | ENST00000377629 | ABHD14A      |
| 8080162 | -0,04 | -1,03 | 0,94113 | 2,58  | 5,97   | 0,00399 | NM_015407       | TCEAL7       |
| 8169015 | -0,04 | -1,03 | 0,94648 | -1,65 | -3,14  | 0,05675 | NM_152278       | MMP19        |
| 7963946 | -0,04 | -1,03 | 0,94229 | -1,56 | -2,94  | 0,02646 | NM_002429       | MLL2         |
| 7962951 | -0,05 | -1,03 | 0,78780 | 2,43  | 5,39   | 0,00171 | NM_003482       | KLC4         |
| 8119670 | -0,05 | -1,03 | 0,90467 | 1,29  | 2,45   | 0,01367 | NM_201523       | OR5AC2       |
| 8081192 | -0,05 | -1,03 | 0,75750 | -1,06 | -2,09  | 0,04993 | NM_054106       | ZIM3         |
| 8039625 | -0,05 | -1,03 | 0,91924 | -0,84 | -1,79  | 0,00063 | NM_052882       | C14orf183    |
| 7978917 | -0,05 | -1,03 | 0,73879 | -1,72 | -3,30  | 0,03060 | NM_001014830    | ZNF322A      |
| 8124459 | -0,05 | -1,03 | 0,84394 | 0,00  | 1,00   | 0,98624 | NM_024639       | ---          |
| 8168779 | -0,05 | -1,03 | 0,58506 | -0,57 | -1,48  | 0,00610 | ---             | FOXF1        |
| 7997726 | -0,05 | -1,03 | 0,82054 | -1,67 | -3,19  | 0,03072 | NM_001451       | CIR1         |
| 8056829 | -0,05 | -1,03 | 0,91192 | -1,13 | -2,19  | 0,02665 | NM_004882       | RRM2         |
| 8040223 | -0,05 | -1,03 | 0,90566 | 1,70  | 3,26   | 0,04737 | NM_001165931    | ---          |
| 8174373 | -0,05 | -1,03 | 0,94304 | -0,49 | -1,41  | 0,09027 | ---             | SETMAR       |
| 8077370 | -0,05 | -1,03 | 0,93920 | -0,37 | -1,29  | 0,28148 | NM_006515       | PDE4B        |
| 7902104 | -0,05 | -1,03 | 0,92440 | -0,04 | -1,03  | 0,79724 | NM_002600       | ORAOV1       |
| 7950016 | -0,05 | -1,03 | 0,90253 | 2,37  | 5,15   | 0,00018 | NM_153451       | MAOA         |
| 8166925 | -0,05 | -1,03 | 0,77864 | -0,16 | -1,11  | 0,53678 | NM_000240       | GFRAL        |
| 8120350 | -0,05 | -1,03 | 0,53859 | -0,72 | -1,65  | 0,01708 | NM_207410       | PYCARD       |
| 8001030 | -0,05 | -1,03 | 0,90919 | -0,55 | -1,47  | 0,04828 | NM_013258       | CDK1         |
| 7927710 | -0,05 | -1,03 | 0,90351 | 2,77  | 6,84   | 0,00043 | NM_001786       | RELA         |
| 7949465 | -0,05 | -1,03 | 0,88926 | 1,40  | 2,65   | 0,02564 | NM_021975       | TCF19        |
| 8179228 | -0,05 | -1,03 | 0,80716 | 0,52  | 1,44   | 0,16404 | NM_007109       | OR4N3P       |
| 7981785 | -0,05 | -1,03 | 0,81954 | -0,66 | -1,58  | 0,18468 | NR_028067       | DCAF11       |
| 7973545 | -0,05 | -1,03 | 0,76989 | 1,50  | 2,83   | 0,00839 | NM_025230       | GPATCH4      |
| 7921076 | -0,05 | -1,03 | 0,87721 | 2,36  | 5,15   | 0,00053 | NM_182679       | C20orf7      |

|         |       |       |         |       |       |         |                |           |
|---------|-------|-------|---------|-------|-------|---------|----------------|-----------|
| 8061019 | -0,05 | -1,03 | 0,88372 | 0,98  | 1,97  | 0,00116 | NR_029377      | KRTAP20-3 |
| 8068164 | -0,05 | -1,03 | 0,69846 | -0,78 | -1,72 | 0,01256 | NM_001128077   | OR5C1     |
| 8157696 | -0,05 | -1,03 | 0,87253 | -1,30 | -2,46 | 0,14509 | NM_001001923   | SPIN2B    |
| 8173189 | -0,05 | -1,03 | 0,82587 | -0,36 | -1,29 | 0,42675 | NM_001006681   | PEX6      |
| 8126452 | -0,05 | -1,03 | 0,92493 | 1,13  | 2,19  | 0,05120 | NM_000287      | ACTC1     |
| 7987315 | -0,05 | -1,03 | 0,87648 | 0,44  | 1,36  | 0,35917 | NM_005159      | MIR382    |
| 7976842 | -0,05 | -1,03 | 0,87738 | -1,05 | -2,08 | 0,08284 | NR_029874      | C1orf63   |
| 7913824 | -0,05 | -1,03 | 0,78693 | 0,17  | 1,12  | 0,40531 | NM_020317      | NDUFB7    |
| 8034843 | -0,05 | -1,03 | 0,72264 | 0,00  | 1,00  | 0,99645 | NM_004146      | METT10D   |
| 8011275 | -0,05 | -1,03 | 0,78634 | 2,28  | 4,84  | 0,00039 | NM_024086      | TMEM81    |
| 7923707 | -0,05 | -1,03 | 0,85298 | 1,16  | 2,24  | 0,02755 | NM_203376      | FAM65A    |
| 7996571 | -0,05 | -1,03 | 0,89774 | 1,32  | 2,49  | 0,02829 | NM_024519      | EXOC3     |
| 8104201 | -0,05 | -1,04 | 0,93062 | 0,37  | 1,30  | 0,35751 | NM_007277      | CHRD      |
| 8084496 | -0,05 | -1,04 | 0,89236 | -0,36 | -1,28 | 0,26502 | NM_003741      | KHDC1     |
| 8127511 | -0,05 | -1,04 | 0,65659 | -0,53 | -1,45 | 0,04121 | NM_030568      | WRNIP1    |
| 8116595 | -0,05 | -1,04 | 0,90840 | 1,57  | 2,97  | 0,00030 | NM_020135      | ZDHHC24   |
| 7949645 | -0,05 | -1,04 | 0,76095 | 1,38  | 2,61  | 0,22473 | NM_207340      | MT1M      |
| 7995787 | -0,05 | -1,04 | 0,76324 | 1,26  | 2,40  | 0,06407 | NM_176870      | IL2       |
| 8102697 | -0,05 | -1,04 | 0,71978 | -0,79 | -1,73 | 0,08731 | NM_000586      | RBM10     |
| 8167042 | -0,05 | -1,04 | 0,73932 | 1,44  | 2,72  | 0,03383 | NM_005676      | NEK2      |
| 7924096 | -0,05 | -1,04 | 0,84498 | 1,32  | 2,50  | 0,02635 | NM_002497      | NDUFAF2   |
| 8050591 | -0,05 | -1,04 | 0,77362 | -0,40 | -1,32 | 0,01029 | NM_174889      | ---       |
| 7921031 | -0,05 | -1,04 | 0,95879 | -0,09 | -1,06 | 0,90880 | ---            | ANKRD6    |
| 8121095 | -0,05 | -1,04 | 0,89390 | 0,41  | 1,33  | 0,31108 | NM_014942      | ---       |
| 8151215 | -0,05 | -1,04 | 0,83295 | -1,05 | -2,07 | 0,00043 | ---            | KCNH7     |
| 8056303 | -0,05 | -1,04 | 0,88713 | -1,06 | -2,08 | 0,00257 | NM_033272      | MLF1      |
| 8083616 | -0,05 | -1,04 | 0,77069 | 1,05  | 2,07  | 0,03214 | NM_001130157   | NOM1      |
| 8137584 | -0,05 | -1,04 | 0,91729 | 0,89  | 1,86  | 0,09663 | NM_138400      | SLC6A8    |
| 8001082 | -0,05 | -1,04 | 0,80349 | 0,88  | 1,84  | 0,03550 | NM_005629      | UNC119B   |
| 7959212 | -0,05 | -1,04 | 0,57871 | 1,30  | 2,47  | 0,02466 | NM_001080533   | PPP1R3E   |
| 7977955 | -0,05 | -1,04 | 0,76384 | 0,72  | 1,64  | 0,01384 | NR_026862      | LSM5      |
| 8138912 | -0,05 | -1,04 | 0,76848 | 0,33  | 1,25  | 0,18719 | NM_012322      | ARMC2     |
| 8121370 | -0,05 | -1,04 | 0,89787 | -0,72 | -1,65 | 0,05837 | NM_032131      | HIST1H2BD |
| 8117382 | -0,05 | -1,04 | 0,76335 | 1,87  | 3,65  | 0,05551 | NM_021063      | TPMT      |
| 8124134 | -0,05 | -1,04 | 0,83794 | 1,07  | 2,10  | 0,05897 | NM_000367      | ---       |
| 7965871 | -0,06 | -1,04 | 0,83121 | -1,83 | -3,55 | 0,00391 | ---            | RARG      |
| 7963631 | -0,06 | -1,04 | 0,88249 | 1,75  | 3,37  | 0,02083 | NM_000966      | LOC728819 |
| 8051864 | -0,06 | -1,04 | 0,81399 | -0,39 | -1,31 | 0,50003 | NM_001101330   | BRMS1L    |
| 7973948 | -0,06 | -1,04 | 0,80892 | 1,07  | 2,10  | 0,04066 | NM_032352      | CLCN7     |
| 7998510 | -0,06 | -1,04 | 0,92957 | 2,18  | 4,53  | 0,06078 | NM_001287      | OR1A1     |
| 8003804 | -0,06 | -1,04 | 0,78501 | -0,55 | -1,46 | 0,15784 | NM_014565      | ---       |
| 7906808 | -0,06 | -1,04 | 0,88633 | -1,60 | -3,03 | 0,03101 | ---            | MCART6    |
| 8174288 | -0,06 | -1,04 | 0,64938 | 0,20  | 1,15  | 0,33372 | NM_001012755   | RUVBL2    |
| 8030113 | -0,06 | -1,04 | 0,88840 | 1,68  | 3,20  | 0,00286 | NM_006666      | ZDHHC14   |
| 8122982 | -0,06 | -1,04 | 0,85962 | 1,46  | 2,75  | 0,06558 | NM_024630      | SNX8      |
| 8137833 | -0,06 | -1,04 | 0,91820 | 0,59  | 1,51  | 0,20468 | NM_013321      | DYNC2H1   |
| 7943498 | -0,06 | -1,04 | 0,80561 | -0,03 | -1,02 | 0,78547 | NM_001377      | RBM33     |
| 8137542 | -0,06 | -1,04 | 0,88658 | 1,38  | 2,60  | 0,00410 | NM_053043      | FLJ45248  |
| 8147721 | -0,06 | -1,04 | 0,86646 | -0,80 | -1,74 | 0,04245 | AK127183 ACRV1 |           |
| 7952503 | -0,06 | -1,04 | 0,79944 | -0,06 | -1,04 | 0,87265 | NM_001612      | CLCF1     |
| 7949754 | -0,06 | -1,04 | 0,88621 | 1,34  | 2,54  | 0,06272 | NM_013246      | PSEN2     |
| 7910146 | -0,06 | -1,04 | 0,83850 | 0,95  | 1,94  | 0,16816 | NM_000447      | ASPHD2    |
| 8072108 | -0,06 | -1,04 | 0,87294 | 0,78  | 1,71  | 0,11675 | NM_020437      | CTSF      |
| 7949650 | -0,06 | -1,04 | 0,74263 | 2,19  | 4,57  | 0,03812 | NM_003793      | ---       |
| 8001529 | -0,06 | -1,04 | 0,88391 | -2,49 | -5,62 | 0,00157 | ---            | PGC       |
| 8126324 | -0,06 | -1,04 | 0,88373 | -1,22 | -2,32 | 0,03538 | NM_002630      | C1QTNF9B  |
| 7970595 | -0,06 | -1,04 | 0,82558 | -1,08 | -2,11 | 0,00815 | NM_001007537   | CDCP1     |
| 8086517 | -0,06 | -1,04 | 0,83788 | 3,43  | 10,77 | 0,00325 | NM_022842      | C11orf70  |
| 7943387 | -0,06 | -1,04 | 0,86203 | -0,73 | -1,66 | 0,08930 | BC006128 POLA2 |           |
| 7941214 | -0,06 | -1,04 | 0,84898 | 1,96  | 3,90  | 0,00062 | NM_002689      | CES3      |
| 7996361 | -0,06 | -1,04 | 0,84030 | -0,47 | -1,39 | 0,31985 | NM_024922      | PCSK7     |
| 7951896 | -0,06 | -1,04 | 0,67009 | 0,27  | 1,21  | 0,54209 | NM_004716      | ALG12     |
| 8076851 | -0,06 | -1,04 | 0,82039 | 0,73  | 1,66  | 0,24692 | NM_024105      | AKD1      |
| 8128795 | -0,06 | -1,04 | 0,79318 | 0,57  | 1,49  | 0,14821 | NM_001145128   | GYPB      |
| 8102993 | -0,06 | -1,04 | 0,80787 | -0,46 | -1,37 | 0,11646 | NM_002100      | LIN28A    |
| 8065011 | -0,06 | -1,04 | 0,84296 | -0,46 | -1,38 | 0,02391 | NM_024674      | DHFR1L1   |
| 8089029 | -0,06 | -1,04 | 0,58012 | -0,01 | -1,01 | 0,94631 | NM_176815      | SGOL1     |
| 8085754 | -0,06 | -1,04 | 0,89921 | 1,95  | 3,85  | 0,02235 | NM_001012410   | FAM171A2  |
| 8016033 | -0,06 | -1,04 | 0,80107 | 1,05  | 2,07  | 0,19721 | NM_198475      | C19orf44  |
| 8026568 | -0,06 | -1,04 | 0,86603 | 0,42  | 1,34  | 0,23565 | NM_032207      | ---       |
| 8074059 | -0,06 | -1,04 | 0,53925 | -0,08 | -1,06 | 0,73911 | ---            | BMPER     |
| 8132250 | -0,06 | -1,04 | 0,73159 | -1,43 | -2,70 | 0,00694 | NM_133468      | C14orf48  |
| 7976412 | -0,06 | -1,04 | 0,86124 | 0,06  | 1,04  | 0,60426 | NR_024183      | TRNAU1AP  |

|         |       |       |         |       |       |         |                   |              |
|---------|-------|-------|---------|-------|-------|---------|-------------------|--------------|
| 7899486 | -0,06 | -1,04 | 0,77037 | 1,09  | 2,13  | 0,02162 | NR_003109         | C20orf96     |
| 8064322 | -0,06 | -1,04 | 0,76397 | 0,96  | 1,95  | 0,02592 | NM_153269         | PPP1R2P1     |
| 8125527 | -0,06 | -1,04 | 0,61579 | -0,37 | -1,29 | 0,12901 | AF275684 PPP1R2P1 |              |
| 8178882 | -0,06 | -1,04 | 0,61579 | -0,37 | -1,29 | 0,12901 | AF275684 PPP1R2P1 |              |
| 8180076 | -0,06 | -1,04 | 0,61579 | -0,37 | -1,29 | 0,12901 | AF275684 FLJ38894 |              |
| 7942771 | -0,06 | -1,04 | 0,76500 | -1,17 | -2,25 | 0,00373 | AK096213 ---      |              |
| 8166667 | -0,06 | -1,04 | 0,86984 | -0,45 | -1,37 | 0,01701 | --- TIGD1         |              |
| 8059770 | -0,06 | -1,04 | 0,87652 | 1,73  | 3,32  | 0,00499 | NM_145702         | SLC47A1      |
| 8005603 | -0,06 | -1,04 | 0,84443 | 2,87  | 7,32  | 0,00338 | NM_018242         | ---          |
| 8170633 | -0,06 | -1,04 | 0,89287 | -0,25 | -1,19 | 0,37858 | ---               |              |
| 8175773 | -0,06 | -1,04 | 0,89287 | -0,25 | -1,19 | 0,37858 | --- GLT25D2       |              |
| 7922807 | -0,06 | -1,04 | 0,85928 | 0,90  | 1,87  | 0,03217 | NM_015101         | CD177        |
| 8037298 | -0,06 | -1,04 | 0,93014 | -1,66 | -3,16 | 0,06140 | NM_020406         | RPL23        |
| 8014749 | -0,06 | -1,04 | 0,74127 | 1,18  | 2,27  | 0,04764 | NM_000978         | LOC648987    |
| 8111922 | -0,06 | -1,04 | 0,76944 | 1,63  | 3,09  | 0,00312 | ENST00000314957   | GOLGA3       |
| 7967810 | -0,06 | -1,05 | 0,72293 | 0,63  | 1,55  | 0,10039 | NM_005895         | TAF4B        |
| 8020702 | -0,06 | -1,05 | 0,69175 | 2,74  | 6,67  | 0,00120 | NM_005640         | LOC100287934 |
| 7896754 | -0,06 | -1,05 | 0,74711 | -0,45 | -1,36 | 0,34232 | AK290103 LNX1     |              |
| 8100362 | -0,06 | -1,05 | 0,83311 | -0,77 | -1,71 | 0,00404 | NM_001126328      | C7orf25      |
| 8139228 | -0,06 | -1,05 | 0,90938 | 0,03  | 1,02  | 0,93992 | NM_001099858      | TNFSF13B     |
| 7969986 | -0,06 | -1,05 | 0,87864 | -0,81 | -1,75 | 0,00028 | NM_006573         | NIPAL4       |
| 8109563 | -0,06 | -1,05 | 0,74621 | 0,65  | 1,57  | 0,08246 | NM_001099287      | KLK12        |
| 8038747 | -0,06 | -1,05 | 0,82493 | -0,54 | -1,46 | 0,00281 | NM_145894         | KRT85        |
| 7963366 | -0,06 | -1,05 | 0,71078 | -0,71 | -1,64 | 0,12028 | NM_002283         | ZNF498       |
| 8134644 | -0,06 | -1,05 | 0,81922 | 0,02  | 1,01  | 0,95201 | NM_145115         | PDE12        |
| 8080676 | -0,06 | -1,05 | 0,85226 | 0,70  | 1,62  | 0,08441 | NM_177966         | ---          |
| 8009253 | -0,07 | -1,05 | 0,86298 | -0,56 | -1,47 | 0,16340 | --- TAOK2         |              |
| 7994692 | -0,07 | -1,05 | 0,70381 | 1,09  | 2,13  | 0,01967 | NM_016151         | LMTK2        |
| 8134435 | -0,07 | -1,05 | 0,81947 | 1,94  | 3,85  | 0,00286 | NM_014916         | KDM4B        |
| 8024909 | -0,07 | -1,05 | 0,71826 | 0,39  | 1,31  | 0,25054 | NM_015015         | ---          |
| 7953128 | -0,07 | -1,05 | 0,83878 | -0,37 | -1,29 | 0,22747 | --- SCD5          |              |
| 8101366 | -0,07 | -1,05 | 0,77187 | 0,60  | 1,51  | 0,00334 | NM_001037582      | HIST1H1D     |
| 8124430 | -0,07 | -1,05 | 0,75777 | -0,56 | -1,47 | 0,13720 | NM_005320         | GPR161       |
| 7922108 | -0,07 | -1,05 | 0,80662 | -0,50 | -1,41 | 0,02220 | NM_153832         | GREM2        |
| 7925452 | -0,07 | -1,05 | 0,78360 | -0,85 | -1,80 | 0,02364 | NM_022469         | ---          |
| 8139365 | -0,07 | -1,05 | 0,52236 | -0,86 | -1,82 | 0,00491 | --- SUDS3         |              |
| 7959080 | -0,07 | -1,05 | 0,80482 | 0,41  | 1,33  | 0,14868 | NM_022491         | MIR222       |
| 8172268 | -0,07 | -1,05 | 0,73019 | -0,74 | -1,67 | 0,24758 | NR_029636         | CMC1         |
| 8078312 | -0,07 | -1,05 | 0,77800 | -0,35 | -1,28 | 0,48670 | NM_182523         | RIMKLB       |
| 7953765 | -0,07 | -1,05 | 0,89754 | 2,90  | 7,45  | 0,00019 | NM_020734         | LOC653113    |
| 7960889 | -0,07 | -1,05 | 0,90539 | -0,13 | -1,09 | 0,84568 | NR_024254         | C17orf101    |
| 8019494 | -0,07 | -1,05 | 0,86520 | 0,81  | 1,76  | 0,00515 | NR_033265         | RBM28        |
| 8142774 | -0,07 | -1,05 | 0,87779 | 1,68  | 3,20  | 0,00110 | NM_018077         | ANKRD16      |
| 7931888 | -0,07 | -1,05 | 0,85403 | 0,91  | 1,87  | 0,03604 | NM_019046         | JUP          |
| 8015412 | -0,07 | -1,05 | 0,83112 | 2,41  | 5,33  | 0,00398 | NM_002230         | ZNF692       |
| 7925773 | -0,07 | -1,05 | 0,78652 | 1,82  | 3,52  | 0,00066 | NM_017865         | ARMC4        |
| 7932744 | -0,07 | -1,05 | 0,88715 | -0,19 | -1,14 | 0,66631 | NM_018076         | ARAP1        |
| 7950197 | -0,07 | -1,05 | 0,75711 | 0,76  | 1,69  | 0,14588 | NM_015242         | TNXB         |
| 8125234 | -0,07 | -1,05 | 0,75807 | -0,32 | -1,25 | 0,24986 | NM_019105         | AMAC1L2      |
| 8144600 | -0,07 | -1,05 | 0,84992 | -0,81 | -1,76 | 0,10903 | NM_054028         | ---          |
| 7924551 | -0,07 | -1,05 | 0,84520 | -1,03 | -2,04 | 0,15947 | ---               |              |
| 7925523 | -0,07 | -1,05 | 0,84520 | -1,03 | -2,04 | 0,15947 | ---               |              |
| 8132690 | -0,07 | -1,05 | 0,84520 | -1,03 | -2,04 | 0,15947 | ---               |              |
| 8047401 | -0,07 | -1,05 | 0,86758 | 3,20  | 9,16  | 0,00034 | ---               |              |
| 7964640 | -0,07 | -1,05 | 0,87294 | -0,51 | -1,42 | 0,02596 | --- C12orf64      |              |
| 7957351 | -0,07 | -1,05 | 0,74817 | -0,72 | -1,65 | 0,05761 | NM_173591         | C14orf138    |
| 7978923 | -0,07 | -1,05 | 0,81118 | 2,84  | 7,16  | 0,00146 | NM_024558         | ---          |
| 7929114 | -0,07 | -1,05 | 0,86290 | 0,05  | 1,04  | 0,65442 | ---               |              |
| 8101699 | -0,07 | -1,05 | 0,92592 | -1,27 | -2,41 | 0,02574 | --- HSPB3         |              |
| 8105323 | -0,07 | -1,05 | 0,78824 | -1,48 | -2,79 | 0,04318 | NM_006308         | WFDC6        |
| 8066536 | -0,07 | -1,05 | 0,87782 | -1,32 | -2,49 | 0,01577 | NM_080827         | LHFPL5       |
| 8118995 | -0,07 | -1,05 | 0,80100 | -0,12 | -1,08 | 0,73890 | NM_182548         | SORCS2       |
| 8093997 | -0,07 | -1,05 | 0,89794 | -0,78 | -1,72 | 0,10412 | NM_020777         | ---          |
| 7987926 | -0,07 | -1,05 | 0,77759 | -0,87 | -1,82 | 0,03256 | --- PTAFR         |              |
| 7914184 | -0,07 | -1,05 | 0,90780 | -0,95 | -1,93 | 0,02971 | NM_001164721      | FLJ13197     |
| 8099817 | -0,07 | -1,05 | 0,83190 | -0,59 | -1,51 | 0,00223 | NR_026804         | ---          |
| 7917528 | -0,07 | -1,05 | 0,71862 | 0,10  | 1,07  | 0,51721 | --- LOC100130193  |              |
| 7898568 | -0,07 | -1,05 | 0,85376 | -0,77 | -1,71 | 0,00169 | AK096102 FLJ33996 |              |
| 7955533 | -0,07 | -1,05 | 0,86428 | 1,16  | 2,24  | 0,01439 | ENST00000423909   | SPINK9       |
| 8109057 | -0,07 | -1,05 | 0,69960 | -0,33 | -1,25 | 0,02617 | NM_001040433      | P2RX7        |
| 7959251 | -0,07 | -1,05 | 0,91599 | -0,99 | -1,99 | 0,01565 | NM_002562         | SH3YL1       |
| 8049969 | -0,07 | -1,05 | 0,76939 | 1,18  | 2,26  | 0,01521 | NM_015677         | CYP39A1      |
| 8126770 | -0,07 | -1,05 | 0,87748 | 0,42  | 1,34  | 0,40723 | NM_016593         | ---          |

|         |       |       |         |       |       |         |                 |              |  |
|---------|-------|-------|---------|-------|-------|---------|-----------------|--------------|--|
| 8104727 | -0,07 | -1,05 | 0,86293 | 0,42  | 1,33  | 0,07240 | ---             | RNF180       |  |
| 8105585 | -0,07 | -1,05 | 0,84221 | -1,13 | -2,19 | 0,03390 | NM_001113561    | PARS2        |  |
| 7916422 | -0,07 | -1,05 | 0,90162 | 1,31  | 2,48  | 0,00255 | NM_152268       | SNORD78      |  |
| 7922408 | -0,07 | -1,05 | 0,32940 | 1,58  | 3,00  | 0,00872 | NR_003944       | LOC100129312 |  |
| 8056810 | -0,07 | -1,05 | 0,69969 | -1,51 | -2,84 | 0,00017 | AK095037        | ---          |  |
| 8051409 | -0,07 | -1,05 | 0,87463 | -0,82 | -1,76 | 0,00239 | ---             | ADAMTS15     |  |
| 7945232 | -0,07 | -1,05 | 0,78492 | 1,49  | 2,81  | 0,00800 | NM_139055       | ---          |  |
| 7991399 | -0,07 | -1,05 | 0,80009 | -1,29 | -2,44 | 0,00015 | ---             | GNB5         |  |
| 7988859 | -0,07 | -1,05 | 0,54029 | 0,74  | 1,67  | 0,02765 | NM_006578       | RNF212       |  |
| 8098856 | -0,07 | -1,05 | 0,76862 | 4,38  | 20,76 | 0,00002 | NM_001131034    | KIF15        |  |
| 8079237 | -0,07 | -1,05 | 0,86748 | 2,07  | 4,21  | 0,01494 | NM_020242       | LY6G5C       |  |
| 8178554 | -0,07 | -1,05 | 0,63510 | 0,18  | 1,13  | 0,47532 | NM_025262       | ---          |  |
| 8052733 | -0,07 | -1,05 | 0,74667 | -0,50 | -1,42 | 0,39681 | ---             | LOC440173    |  |
| 8162183 | -0,07 | -1,05 | 0,87676 | -1,67 | -3,19 | 0,06919 | NR_027471       | CMTM1        |  |
| 7996290 | -0,07 | -1,05 | 0,71518 | 0,68  | 1,60  | 0,00041 | NM_052999       | ---          |  |
| 8102350 | -0,07 | -1,05 | 0,85819 | 0,34  | 1,26  | 0,02803 | ---             | METTL2B      |  |
| 8135922 | -0,07 | -1,05 | 0,90340 | 0,21  | 1,15  | 0,51573 | NM_018396       | ---          |  |
| 8136578 | -0,07 | -1,05 | 0,75676 | -0,76 | -1,69 | 0,03496 | ---             | SEPW1        |  |
| 8029969 | -0,08 | -1,05 | 0,68894 | 0,34  | 1,26  | 0,20310 | NM_003009       | PPM1M        |  |
| 8080198 | -0,08 | -1,05 | 0,86897 | 0,32  | 1,25  | 0,33064 | NM_144641       | FLJ34521     |  |
| 7945228 | -0,08 | -1,05 | 0,85653 | -0,34 | -1,27 | 0,59526 | ENST00000318117 | APOL2        |  |
| 8075720 | -0,08 | -1,05 | 0,89003 | -0,36 | -1,28 | 0,19282 | NM_030882       | RPS4Y2       |  |
| 8176730 | -0,08 | -1,05 | 0,72479 | -0,21 | -1,15 | 0,01980 | NM_001039567    | CLCN6        |  |
| 7897774 | -0,08 | -1,05 | 0,78429 | 1,62  | 3,06  | 0,00264 | NM_001286       | LINS1        |  |
| 7991566 | -0,08 | -1,05 | 0,82425 | 0,08  | 1,06  | 0,70179 | NM_018148       | XRCC2        |  |
| 8144036 | -0,08 | -1,05 | 0,73175 | 1,26  | 2,39  | 0,07071 | NM_005431       | KIAA1383     |  |
| 7910589 | -0,08 | -1,05 | 0,74634 | 0,22  | 1,17  | 0,46464 | NM_019090       | PAR5         |  |
| 7981943 | -0,08 | -1,05 | 0,49143 | 0,23  | 1,17  | 0,35647 | NR_022008       | SP2          |  |
| 8008052 | -0,08 | -1,06 | 0,86144 | 1,31  | 2,47  | 0,00031 | NM_003110       | USP1         |  |
| 7901867 | -0,08 | -1,06 | 0,75611 | 1,33  | 2,51  | 0,00318 | NM_003368       | LPCAT4       |  |
| 7987230 | -0,08 | -1,06 | 0,89058 | 2,80  | 6,94  | 0,00145 | NM_153613       | PLD4         |  |
| 7977319 | -0,08 | -1,06 | 0,87653 | -1,47 | -2,78 | 0,00238 | NM_138790       | STAG3L3      |  |
| 8133610 | -0,08 | -1,06 | 0,91241 | 1,59  | 3,01  | 0,00380 | NM_001013739    | GPR50        |  |
| 8170476 | -0,08 | -1,06 | 0,89469 | -0,54 | -1,46 | 0,31061 | NM_004224       | PTH1R        |  |
| 8079433 | -0,08 | -1,06 | 0,87525 | 0,11  | 1,08  | 0,26332 | NM_000316       | CSPG4        |  |
| 7990545 | -0,08 | -1,06 | 0,78145 | -0,11 | -1,08 | 0,73091 | NM_001897       | ---          |  |
| 8041957 | -0,08 | -1,06 | 0,77708 | -0,54 | -1,46 | 0,08206 | ---             | KLHL31       |  |
| 8127177 | -0,08 | -1,06 | 0,71707 | -0,53 | -1,44 | 0,14979 | NM_001003760    | WNT8A        |  |
| 8108287 | -0,08 | -1,06 | 0,69526 | -1,14 | -2,20 | 0,00093 | NM_058244       | FAM100B      |  |
| 8010050 | -0,08 | -1,06 | 0,72353 | 0,59  | 1,51  | 0,26267 | NM_182565       | ST3GAL4      |  |
| 7945110 | -0,08 | -1,06 | 0,62834 | 0,18  | 1,13  | 0,41874 | NM_006278       | ZNF33B       |  |
| 7933139 | -0,08 | -1,06 | 0,77130 | 1,40  | 2,64  | 0,02683 | NM_006955       | SRRT         |  |
| 8134992 | -0,08 | -1,06 | 0,87696 | 0,99  | 1,99  | 0,10499 | NM_015908       | NOL7         |  |
| 8123985 | -0,08 | -1,06 | 0,76177 | -0,55 | -1,46 | 0,08737 | NM_016167       | PPEF1        |  |
| 8166314 | -0,08 | -1,06 | 0,65500 | 0,48  | 1,39  | 0,08775 | NM_006240       | ---          |  |
| 7991665 | -0,08 | -1,06 | 0,87705 | -1,42 | -2,68 | 0,00107 | ---             | FLJ20712     |  |
| 8132245 | -0,08 | -1,06 | 0,78561 | -0,73 | -1,66 | 0,00103 | ENST00000311067 | ITGB1BP2     |  |
| 8168291 | -0,08 | -1,06 | 0,66072 | -0,62 | -1,54 | 0,04096 | NM_012278       | SMPD4        |  |
| 8045301 | -0,08 | -1,06 | 0,85122 | 1,85  | 3,60  | 0,02570 | NM_017751       | ---          |  |
| 8166264 | -0,08 | -1,06 | 0,87950 | -1,77 | -3,42 | 0,03886 | ---             | VIP          |  |
| 8122865 | -0,08 | -1,06 | 0,74255 | -0,66 | -1,58 | 0,05105 | NM_003381       | TCF25        |  |
| 7998033 | -0,08 | -1,06 | 0,87527 | 0,73  | 1,66  | 0,16425 | NM_014972       | C3orf42      |  |
| 8077815 | -0,08 | -1,06 | 0,72323 | -0,24 | -1,18 | 0,34664 | NR_026829       | ---          |  |
| 8175332 | -0,08 | -1,06 | 0,77420 | -0,37 | -1,30 | 0,06166 | ---             | POLR3F       |  |
| 8061171 | -0,08 | -1,06 | 0,77665 | 1,16  | 2,24  | 0,02246 | NM_006466       | PIK3R2       |  |
| 8026954 | -0,08 | -1,06 | 0,80079 | 0,44  | 1,35  | 0,24854 | NM_005027       | CISH         |  |
| 8087739 | -0,08 | -1,06 | 0,73148 | 0,14  | 1,10  | 0,65766 | NM_013324       | ZBTB17       |  |
| 7912675 | -0,08 | -1,06 | 0,83145 | 0,06  | 1,04  | 0,89568 | NM_003443       | ---          |  |
| 8154388 | -0,08 | -1,06 | 0,90293 | 0,46  | 1,38  | 0,37363 | ---             | NINL         |  |
| 8065485 | -0,08 | -1,06 | 0,82421 | -0,11 | -1,08 | 0,22565 | NM_025176       | TBL2         |  |
| 8140070 | -0,08 | -1,06 | 0,52137 | 0,36  | 1,28  | 0,23098 | NM_012453       | ARSE         |  |
| 8171161 | -0,08 | -1,06 | 0,74829 | -1,01 | -2,02 | 0,04648 | NM_000047       | GLUD2        |  |
| 8169711 | -0,08 | -1,06 | 0,81947 | -0,25 | -1,19 | 0,15854 | NM_012084       | KRTAP5-3     |  |
| 7945652 | -0,08 | -1,06 | 0,92078 | -0,41 | -1,33 | 0,53608 | NM_001012708    | MYB          |  |
| 8122202 | -0,08 | -1,06 | 0,82500 | 0,29  | 1,23  | 0,33238 | NM_001130173    | WDR60        |  |
| 8137639 | -0,08 | -1,06 | 0,82718 | 1,22  | 2,33  | 0,03341 | NM_018051       | ---          |  |
| 8159848 | -0,08 | -1,06 | 0,49534 | -0,45 | -1,37 | 0,14171 | ---             | BIRC3        |  |
| 7943413 | -0,08 | -1,06 | 0,54924 | 0,43  | 1,35  | 0,03440 | NM_001165       | SNORD116-25  |  |
| 7981998 | -0,08 | -1,06 | 0,72094 | -0,77 | -1,70 | 0,07772 | NR_003339       | S100A7L2     |  |
| 7920249 | -0,08 | -1,06 | 0,63211 | -1,01 | -2,02 | 0,01804 | NM_001045479    | FAM74A3      |  |
| 8161337 | -0,08 | -1,06 | 0,82062 | -1,36 | -2,56 | 0,00747 | ENST00000377629 | WDR31        |  |
| 8163491 | -0,08 | -1,06 | 0,80796 | 0,65  | 1,57  | 0,00568 | NM_001012361    | FBXW4        |  |
| 7935882 | -0,08 | -1,06 | 0,78966 | 1,26  | 2,39  | 0,05331 | NM_022039       | FAM117A      |  |

|         |       |       |         |       |        |         |                 |              |
|---------|-------|-------|---------|-------|--------|---------|-----------------|--------------|
| 8016590 | -0,08 | -1,06 | 0,87026 | 2,04  | 4,12   | 0,00024 | NM_030802       | CCDC18       |
| 7903049 | -0,08 | -1,06 | 0,54923 | -0,38 | -1,31  | 0,09618 | NM_206886       | ---          |
| 8029829 | -0,08 | -1,06 | 0,78053 | -0,49 | -1,40  | 0,02705 | ---             | ---          |
| 7967454 | -0,08 | -1,06 | 0,62818 | -1,38 | -2,61  | 0,03086 | ---             | ABTB1        |
| 8082380 | -0,08 | -1,06 | 0,75442 | -0,55 | -1,47  | 0,09030 | NM_172027       | KIF27        |
| 8162019 | -0,09 | -1,06 | 0,47459 | 0,28  | 1,22   | 0,41993 | NM_017576       | C13orf38     |
| 7970989 | -0,09 | -1,06 | 0,49470 | 0,71  | 1,64   | 0,09706 | NM_001144981    | ZNF193       |
| 8117655 | -0,09 | -1,06 | 0,86654 | 1,51  | 2,84   | 0,00113 | NM_006299       | LYPLAL1      |
| 7909801 | -0,09 | -1,06 | 0,75926 | 0,69  | 1,61   | 0,04489 | NM_138794       | RASGRP1      |
| 7987405 | -0,09 | -1,06 | 0,64577 | 0,79  | 1,73   | 0,02393 | NM_005739       | ---          |
| 7923582 | -0,09 | -1,06 | 0,92283 | -0,26 | -1,20  | 0,45112 | ---             | KDM4D        |
| 7943282 | -0,09 | -1,06 | 0,59544 | 0,51  | 1,43   | 0,01808 | NM_018039       | ---          |
| 8121275 | -0,09 | -1,06 | 0,78391 | 0,52  | 1,44   | 0,21895 | ---             | OR6C3        |
| 7955991 | -0,09 | -1,06 | 0,82384 | -1,31 | -2,48  | 0,01268 | NM_054104       | B3GALT1      |
| 8046078 | -0,09 | -1,06 | 0,67406 | 0,28  | 1,22   | 0,30162 | NM_020981       | SFTA2        |
| 8124855 | -0,09 | -1,06 | 0,88165 | -1,20 | -2,30  | 0,00194 | NM_205854       | MED18        |
| 7899448 | -0,09 | -1,06 | 0,82856 | 0,05  | 1,04   | 0,45255 | NM_017638       | CLEC4G       |
| 8033433 | -0,09 | -1,06 | 0,84850 | -0,68 | -1,60  | 0,05600 | NM_198492       | ZNF483       |
| 8157193 | -0,09 | -1,06 | 0,76971 | 0,63  | 1,55   | 0,19375 | NM_133464       | RIN3         |
| 7976292 | -0,09 | -1,06 | 0,86621 | 0,09  | 1,07   | 0,72187 | NM_024832       | TMCC3        |
| 7965510 | -0,09 | -1,06 | 0,85288 | 1,13  | 2,19   | 0,05662 | NM_020698       | SAMD4B       |
| 8028624 | -0,09 | -1,06 | 0,43963 | 2,29  | 4,91   | 0,00156 | NM_018028       | SLC4A3       |
| 8048673 | -0,09 | -1,06 | 0,73441 | -0,47 | -1,39  | 0,41008 | NM_201574       | BCDIN3D      |
| 7963139 | -0,09 | -1,06 | 0,78271 | 1,61  | 3,05   | 0,00692 | NM_181708       | NFKB2        |
| 7930074 | -0,09 | -1,06 | 0,66810 | 2,38  | 5,22   | 0,00460 | NM_002502       | DSC3         |
| 8022692 | -0,09 | -1,06 | 0,74557 | -0,13 | -1,09  | 0,58448 | NM_024423       | PCDHGC5      |
| 8108757 | -0,09 | -1,06 | 0,48802 | -0,60 | -1,51  | 0,00253 | NM_018929       | ---          |
| 8158684 | -0,09 | -1,06 | 0,86110 | -0,18 | -1,13  | 0,64296 | ---             | ZNF154       |
| 8039674 | -0,09 | -1,06 | 0,89697 | -0,97 | -1,97  | 0,04964 | NM_001085384    | LOC442075    |
| 8077728 | -0,09 | -1,06 | 0,80747 | 1,33  | 2,52   | 0,00802 | AK092352        | ATRIP        |
| 8079637 | -0,09 | -1,06 | 0,63442 | 0,75  | 1,68   | 0,02103 | NM_130384       | ZNF704       |
| 8151496 | -0,09 | -1,06 | 0,78920 | 2,13  | 4,38   | 0,00831 | NM_001033723    | FTSJD1       |
| 8002523 | -0,09 | -1,06 | 0,72962 | 0,97  | 1,96   | 0,00120 | NM_018348       | MLST8        |
| 7992552 | -0,09 | -1,06 | 0,77742 | -0,30 | -1,23  | 0,42788 | NM_022372       | RBM1A1       |
| 8177277 | -0,09 | -1,06 | 0,88910 | -1,48 | -2,79  | 0,02631 | NM_005058       | C19orf55     |
| 8028016 | -0,09 | -1,06 | 0,87386 | 1,22  | 2,33   | 0,01506 | NM_001039887    | ERICH1       |
| 8148985 | -0,09 | -1,06 | 0,70336 | 0,71  | 1,64   | 0,11459 | NM_207332       | RGS12        |
| 8093764 | -0,09 | -1,06 | 0,76446 | -0,46 | -1,38  | 0,05337 | NM_198229       | OSBPL6       |
| 8046646 | -0,09 | -1,06 | 0,15195 | 2,12  | 4,33   | 0,00118 | NM_032523       | ---          |
| 7932909 | -0,09 | -1,07 | 0,49304 | -0,52 | -1,43  | 0,04821 | ---             | ---          |
| 7973752 | -0,09 | -1,07 | 0,36141 | -0,72 | -1,65  | 0,07349 | ---             | MDM1         |
| 7964810 | -0,09 | -1,07 | 0,84743 | 0,14  | 1,10   | 0,65614 | NM_017440       | ATXN7L3B     |
| 7957242 | -0,09 | -1,07 | 0,57323 | 1,62  | 3,08   | 0,02268 | NM_001136262    | VEGFB        |
| 7940904 | -0,09 | -1,07 | 0,86878 | 1,82  | 3,54   | 0,01168 | NM_003377       | FLJ37035     |
| 7936925 | -0,09 | -1,07 | 0,80639 | 0,56  | 1,48   | 0,19633 | AK094354        | MAGEC2       |
| 8175562 | -0,09 | -1,07 | 0,85221 | -0,41 | -1,33  | 0,08531 | NM_016249       | LOC202181    |
| 8116128 | -0,09 | -1,07 | 0,68882 | -0,48 | -1,40  | 0,14269 | NR_026921       | TRIM49       |
| 7950955 | -0,09 | -1,07 | 0,90769 | -2,11 | -4,31  | 0,00009 | NM_020358       | RBM17        |
| 7926021 | -0,09 | -1,07 | 0,33273 | 1,40  | 2,63   | 0,00154 | NM_001145547    | GEMIN6       |
| 8041553 | -0,09 | -1,07 | 0,75411 | 0,46  | 1,37   | 0,00381 | NM_024775       | ---          |
| 8101814 | -0,09 | -1,07 | 0,43407 | -0,29 | -1,22  | 0,11801 | ---             | DOCK8        |
| 8153959 | -0,09 | -1,07 | 0,71116 | 1,05  | 2,07   | 0,00009 | NM_203447       | TMEM104      |
| 8009693 | -0,09 | -1,07 | 0,76703 | 1,01  | 2,01   | 0,10867 | NM_017728       | DLG4         |
| 8012054 | -0,09 | -1,07 | 0,84440 | 1,43  | 2,70   | 0,02850 | NM_001365       | CLEC1B       |
| 7961102 | -0,09 | -1,07 | 0,84949 | -0,97 | -1,96  | 0,00116 | NM_016509       | ---          |
| 7952735 | -0,09 | -1,07 | 0,58152 | -1,03 | -2,04  | 0,13167 | ---             | ---          |
| 8165700 | -0,09 | -1,07 | 0,93086 | -4,93 | -30,45 | 0,00109 | ---             | PRMT10       |
| 8103079 | -0,09 | -1,07 | 0,61740 | 0,86  | 1,82   | 0,09932 | NM_138364       | ---          |
| 8177092 | -0,09 | -1,07 | 0,82637 | -0,48 | -1,40  | 0,03763 | ---             | DGCR14       |
| 8074364 | -0,09 | -1,07 | 0,82163 | -0,15 | -1,11  | 0,67474 | NM_022719       | OPA3         |
| 8037608 | -0,09 | -1,07 | 0,67100 | 0,19  | 1,14   | 0,67032 | NM_001017989    | MGLL         |
| 8090433 | -0,09 | -1,07 | 0,76872 | 1,57  | 2,97   | 0,01416 | NM_007283       | ATP9B        |
| 8021832 | -0,09 | -1,07 | 0,82249 | 0,83  | 1,77   | 0,09959 | NM_198531       | ---          |
| 8157036 | -0,09 | -1,07 | 0,72942 | -0,89 | -1,86  | 0,00594 | ---             | NSUN6        |
| 7932433 | -0,09 | -1,07 | 0,81234 | 1,19  | 2,28   | 0,03918 | NM_182543       | FSD1L        |
| 8157058 | -0,09 | -1,07 | 0,62130 | -0,08 | -1,06  | 0,71712 | NM_207647       | CCDC134      |
| 8073513 | -0,10 | -1,07 | 0,54047 | 1,49  | 2,81   | 0,01570 | NM_024821       | ZNF461       |
| 8036341 | -0,10 | -1,07 | 0,75348 | 0,52  | 1,44   | 0,11131 | NM_153257       | LOC100129488 |
| 7993754 | -0,10 | -1,07 | 0,68029 | -0,77 | -1,71  | 0,06005 | ENST00000438973 | C3orf33      |
| 8091629 | -0,10 | -1,07 | 0,67450 | 0,96  | 1,94   | 0,05526 | AK289890        | ---          |
| 7898854 | -0,10 | -1,07 | 0,72206 | -0,63 | -1,55  | 0,00034 | ---             | C7orf31      |
| 8138647 | -0,10 | -1,07 | 0,61661 | 1,41  | 2,66   | 0,02627 | NM_138811       | DPH3B        |
| 8064003 | -0,10 | -1,07 | 0,75987 | -0,07 | -1,05  | 0,81825 | NM_080750       | AMBP         |



|         |       |       |         |       |       |         |                  |           |
|---------|-------|-------|---------|-------|-------|---------|------------------|-----------|
| 8163535 | -0,10 | -1,07 | 0,58104 | -0,42 | -1,34 | 0,05792 | NM_001633        | CREBZF    |
| 7950796 | -0,10 | -1,07 | 0,64061 | 0,32  | 1,25  | 0,38875 | NM_001039618     | DIAPH3    |
| 7971866 | -0,10 | -1,07 | 0,78753 | 1,09  | 2,12  | 0,00518 | NM_001042517     | LIPG      |
| 8021169 | -0,10 | -1,07 | 0,77739 | -0,17 | -1,13 | 0,59541 | NM_006033        | ---       |
| 8053311 | -0,10 | -1,07 | 0,88591 | -0,72 | -1,65 | 0,02332 | --- RASA3        | ---       |
| 7972946 | -0,10 | -1,07 | 0,83464 | 0,35  | 1,27  | 0,59087 | NM_007368        | ---       |
| 8022434 | -0,10 | -1,07 | 0,91962 | -2,58 | -5,97 | 0,00059 | --- C9orf7       | ---       |
| 8159078 | -0,10 | -1,07 | 0,85743 | 0,30  | 1,23  | 0,62978 | NM_017586        | LOC391358 |
| 8050906 | -0,10 | -1,07 | 0,82120 | -0,61 | -1,53 | 0,00558 | XM_372921        | ---       |
| 8072272 | -0,10 | -1,07 | 0,90176 | -0,78 | -1,72 | 0,00945 | --- ---          | ---       |
| 8138862 | -0,10 | -1,07 | 0,71722 | -0,05 | -1,04 | 0,89504 | --- MXRA7        | ---       |
| 8018786 | -0,10 | -1,07 | 0,71947 | 0,31  | 1,24  | 0,51998 | NM_001008528     | PRICKLE4  |
| 8119473 | -0,10 | -1,07 | 0,78967 | -0,09 | -1,06 | 0,76471 | NM_013397        | ---       |
| 8161863 | -0,10 | -1,07 | 0,83129 | -0,41 | -1,33 | 0,42545 | --- UPF1         | ---       |
| 8027074 | -0,10 | -1,07 | 0,80467 | 1,82  | 3,52  | 0,02026 | NM_002911        | C2        |
| 8178095 | -0,10 | -1,07 | 0,74734 | -0,23 | -1,17 | 0,26135 | NM_000063        | C2        |
| 8179331 | -0,10 | -1,07 | 0,74734 | -0,23 | -1,17 | 0,26135 | NM_000063        | SLC7A8    |
| 7977933 | -0,10 | -1,07 | 0,78305 | -0,85 | -1,80 | 0,00160 | NM_012244        | TJAP1     |
| 8119829 | -0,10 | -1,07 | 0,44238 | 0,85  | 1,81  | 0,08246 | NM_001146018     | MIF       |
| 8071737 | -0,10 | -1,07 | 0,39121 | -0,50 | -1,42 | 0,13889 | NM_002415        | FAM123B   |
| 8173232 | -0,10 | -1,07 | 0,72117 | -0,22 | -1,16 | 0,57316 | NM_152424        | PDK3      |
| 8166511 | -0,10 | -1,07 | 0,74766 | 1,75  | 3,36  | 0,00110 | NM_005391        | LY6G5C    |
| 8125007 | -0,10 | -1,07 | 0,46352 | 0,10  | 1,07  | 0,64369 | NM_025262        | ---       |
| 8167428 | -0,10 | -1,07 | 0,69207 | -0,75 | -1,68 | 0,04493 | --- ZNF425       | ---       |
| 8143702 | -0,10 | -1,07 | 0,73982 | 0,01  | 1,01  | 0,97324 | NM_001001661     | ---       |
| 8143385 | -0,10 | -1,07 | 0,76055 | -0,55 | -1,47 | 0,09573 | --- HTR3D        | ---       |
| 8084266 | -0,10 | -1,07 | 0,83741 | -1,21 | -2,31 | 0,09186 | NM_182537        | LOC91316  |
| 8074927 | -0,10 | -1,07 | 0,70866 | 1,39  | 2,61  | 0,03696 | NR_024448        | MIR220A   |
| 8174891 | -0,10 | -1,07 | 0,86319 | -1,25 | -2,38 | 0,00547 | NR_029634        | LOXL3     |
| 8053231 | -0,10 | -1,07 | 0,64820 | -0,21 | -1,16 | 0,46443 | NM_032603        | BIK       |
| 8073605 | -0,10 | -1,07 | 0,84308 | -0,12 | -1,09 | 0,66605 | NM_001197        | CIDCEP    |
| 8085276 | -0,10 | -1,07 | 0,76300 | 0,82  | 1,76  | 0,04199 | NR_002786        | DLG3      |
| 8168179 | -0,10 | -1,07 | 0,68684 | 0,97  | 1,95  | 0,00427 | NM_021120        | CTAGE5    |
| 7974090 | -0,10 | -1,07 | 0,67398 | 0,97  | 1,96  | 0,00912 | NM_005930        | LRRK1     |
| 7986463 | -0,10 | -1,07 | 0,78715 | 1,44  | 2,72  | 0,01207 | NM_024652        | ---       |
| 8072139 | -0,10 | -1,07 | 0,73199 | -0,96 | -1,95 | 0,02948 | --- ACTR1B       | ---       |
| 8054077 | -0,10 | -1,07 | 0,77356 | 1,58  | 3,00  | 0,03494 | NM_005735        | CABC1     |
| 7910164 | -0,10 | -1,07 | 0,68411 | 0,76  | 1,69  | 0,16827 | NM_020247        | FFAR1     |
| 8027854 | -0,10 | -1,07 | 0,82452 | -0,55 | -1,46 | 0,34363 | NM_005303        | ---       |
| 8135361 | -0,10 | -1,07 | 0,52412 | -1,19 | -2,27 | 0,00289 | --- LPAL2        | ---       |
| 8130598 | -0,10 | -1,07 | 0,85866 | -0,18 | -1,13 | 0,87787 | NR_028093        | FBXO48    |
| 8052742 | -0,10 | -1,07 | 0,73472 | -0,03 | -1,02 | 0,85480 | NM_001024680     | RING1     |
| 8118634 | -0,10 | -1,07 | 0,84788 | 1,16  | 2,24  | 0,03236 | NM_002931        | ---       |
| 8083445 | -0,10 | -1,07 | 0,88801 | -0,86 | -1,81 | 0,12992 | --- SGEF         | ---       |
| 8083471 | -0,10 | -1,07 | 0,50903 | 3,10  | 8,55  | 0,00023 | NM_015595        | ---       |
| 8055946 | -0,10 | -1,07 | 0,71948 | -1,06 | -2,08 | 0,06541 | --- AAAS         | ---       |
| 7963646 | -0,10 | -1,07 | 0,83234 | 2,25  | 4,76  | 0,00646 | NM_015665        | EHD1      |
| 7949264 | -0,10 | -1,07 | 0,69176 | 0,52  | 1,43  | 0,14661 | NM_006795        | CLEC12B   |
| 7953914 | -0,10 | -1,07 | 0,75957 | -0,88 | -1,84 | 0,04702 | NM_205852        | IL10RA    |
| 7944152 | -0,10 | -1,07 | 0,64444 | -0,26 | -1,20 | 0,50348 | NM_001558        | TRY6      |
| 8136801 | -0,10 | -1,08 | 0,44746 | -0,11 | -1,08 | 0,65816 | NR_001296        | MBLAC2    |
| 8113059 | -0,10 | -1,08 | 0,78543 | 0,01  | 1,01  | 0,95239 | NM_203406        | SLC38A7   |
| 8001750 | -0,10 | -1,08 | 0,64361 | 1,07  | 2,10  | 0,02181 | NM_018231        | C8orf34   |
| 8146839 | -0,10 | -1,08 | 0,49179 | -0,78 | -1,72 | 0,00431 | BC041961 PPFIBP2 | ---       |
| 7938231 | -0,11 | -1,08 | 0,68265 | -0,09 | -1,07 | 0,44777 | NM_003621        | NQO2      |
| 8123637 | -0,11 | -1,08 | 0,80657 | 0,03  | 1,02  | 0,94175 | NM_000904        | ADPRH     |
| 8081880 | -0,11 | -1,08 | 0,68738 | -0,24 | -1,18 | 0,54569 | NM_001125        | SHISA3    |
| 8094870 | -0,11 | -1,08 | 0,80165 | -1,14 | -2,20 | 0,12775 | NM_001080505     | NCDN      |
| 7899990 | -0,11 | -1,08 | 0,83992 | 2,55  | 5,86  | 0,00510 | NM_014284        | PI4K2B    |
| 8094378 | -0,11 | -1,08 | 0,61802 | 1,03  | 2,05  | 0,01946 | NM_018323        | GAL3ST2   |
| 8049934 | -0,11 | -1,08 | 0,65583 | -0,57 | -1,49 | 0,01745 | NM_022134        | ---       |
| 8081501 | -0,11 | -1,08 | 0,54514 | -0,54 | -1,45 | 0,00861 | --- TCHP         | ---       |
| 7958582 | -0,11 | -1,08 | 0,66715 | 0,27  | 1,20  | 0,31730 | NM_032300        | RBM14     |
| 7941702 | -0,11 | -1,08 | 0,34535 | -0,20 | -1,15 | 0,49359 | NM_006328        | VPS37B    |
| 7967331 | -0,11 | -1,08 | 0,81089 | 0,67  | 1,59  | 0,06601 | NM_024667        | PCDHB13   |
| 8108737 | -0,11 | -1,08 | 0,80353 | 0,42  | 1,33  | 0,04788 | NM_018933        | CDC42EP2  |
| 7941236 | -0,11 | -1,08 | 0,68748 | -0,55 | -1,46 | 0,37927 | NM_006779        | ---       |
| 8096533 | -0,11 | -1,08 | 0,73168 | -0,05 | -1,03 | 0,74548 | --- DENND2C      | ---       |
| 7918757 | -0,11 | -1,08 | 0,67682 | -0,27 | -1,20 | 0,42971 | BC063894 AGXT2L2 | ---       |
| 8116177 | -0,11 | -1,08 | 0,57296 | 1,93  | 3,81  | 0,00008 | NM_153373        | HDAC8     |
| 8173531 | -0,11 | -1,08 | 0,69080 | 1,98  | 3,94  | 0,00043 | NM_018486        | CMTM8     |
| 8078397 | -0,11 | -1,08 | 0,51063 | 1,55  | 2,93  | 0,00351 | NM_178868        | ---       |
| 7938368 | -0,11 | -1,08 | 0,90142 | -0,60 | -1,52 | 0,09882 | --- FEZF2        | ---       |

|         |       |       |         |       |       |         |                 |              |
|---------|-------|-------|---------|-------|-------|---------|-----------------|--------------|
| 8088485 | -0,11 | -1,08 | 0,53403 | -1,33 | -2,51 | 0,00460 | NM_018008       | C14orf33     |
| 7979351 | -0,11 | -1,08 | 0,73507 | 2,80  | 6,98  | 0,00622 | NR_027123       | LRRRC8A      |
| 8158424 | -0,11 | -1,08 | 0,14585 | 2,61  | 6,09  | 0,00572 | NM_001127244    | KRT6B        |
| 7963406 | -0,11 | -1,08 | 0,82714 | -1,20 | -2,29 | 0,03545 | NM_005555       | N6AMT1       |
| 8069700 | -0,11 | -1,08 | 0,65725 | -0,17 | -1,13 | 0,66930 | NM_013240       | ZNF672       |
| 7911289 | -0,11 | -1,08 | 0,75704 | 0,89  | 1,85  | 0,01331 | NM_024836       | TCN1         |
| 7948444 | -0,11 | -1,08 | 0,42534 | -0,86 | -1,81 | 0,01711 | NM_001062       | SLFN12       |
| 8014241 | -0,11 | -1,08 | 0,53247 | 0,51  | 1,43  | 0,33601 | NM_018042       | PITPNM1      |
| 7949808 | -0,11 | -1,08 | 0,80330 | 0,98  | 1,97  | 0,20195 | NM_004910       | DLK2         |
| 8126556 | -0,11 | -1,08 | 0,78046 | 0,47  | 1,38  | 0,40161 | NM_023932       | PMS2CL       |
| 8131444 | -0,11 | -1,08 | 0,87822 | -0,92 | -1,89 | 0,11105 | NR_002217       | KIR2DL4      |
| 8039859 | -0,11 | -1,08 | 0,85100 | -1,26 | -2,40 | 0,00030 | NM_002255       | ---          |
| 8126705 | -0,11 | -1,08 | 0,70752 | -0,83 | -1,77 | 0,00020 | ---             | ---          |
| 8025893 | -0,11 | -1,08 | 0,82558 | -1,09 | -2,12 | 0,00675 | ---             | JUB          |
| 7977854 | -0,11 | -1,08 | 0,62670 | 1,82  | 3,54  | 0,00465 | NM_032876       | CCL11        |
| 8006445 | -0,11 | -1,08 | 0,66120 | -1,02 | -2,02 | 0,12589 | NM_002986       | ANAPC1       |
| 8043322 | -0,11 | -1,08 | 0,75458 | 1,42  | 2,68  | 0,01580 | NM_022662       | UNG          |
| 7958455 | -0,11 | -1,08 | 0,66865 | 2,64  | 6,22  | 0,00124 | NM_003362       | SNORA54      |
| 7945801 | -0,11 | -1,08 | 0,49303 | -1,18 | -2,27 | 0,03333 | NR_002982       | ---          |
| 8143594 | -0,11 | -1,08 | 0,79140 | -0,78 | -1,72 | 0,03758 | ---             | FER1L6       |
| 8152742 | -0,11 | -1,08 | 0,68787 | -0,91 | -1,88 | 0,00646 | ENST00000399018 | ---          |
| 7950062 | -0,11 | -1,08 | 0,83907 | -1,15 | -2,22 | 0,03776 | ---             | USP54        |
| 7934411 | -0,11 | -1,08 | 0,60864 | 2,01  | 4,02  | 0,00988 | NM_152586       | ARID3B       |
| 7902592 | -0,11 | -1,08 | 0,64110 | 1,48  | 2,80  | 0,01072 | NM_006465       | C21orf94     |
| 8067836 | -0,11 | -1,08 | 0,87231 | -0,01 | -1,01 | 0,98099 | NR_027246       | RSPH4A       |
| 8121622 | -0,11 | -1,08 | 0,48869 | -0,73 | -1,65 | 0,00494 | NM_001010892    | PPP1R15A     |
| 8030128 | -0,11 | -1,08 | 0,49183 | 1,52  | 2,87  | 0,01088 | NM_014330       | ---          |
| 8136589 | -0,11 | -1,08 | 0,78113 | -0,35 | -1,27 | 0,05866 | ---             | ---          |
| 7950442 | -0,11 | -1,08 | 0,46122 | -0,80 | -1,74 | 0,00832 | ---             | B3GNTL1      |
| 8019559 | -0,11 | -1,08 | 0,79895 | -0,85 | -1,80 | 0,04338 | AK126018        | ---          |
| 7983771 | -0,11 | -1,08 | 0,75230 | -2,01 | -4,03 | 0,01960 | ---             | MGAM         |
| 8136662 | -0,11 | -1,08 | 0,63084 | -0,78 | -1,72 | 0,00429 | NM_004668       | ---          |
| 8166659 | -0,11 | -1,08 | 0,61037 | -0,08 | -1,06 | 0,85012 | ---             | HIST2H2AA3   |
| 7905079 | -0,11 | -1,08 | 0,73296 | 0,48  | 1,39  | 0,38269 | NM_003516       | HIST2H2AA3   |
| 7919619 | -0,11 | -1,08 | 0,73296 | 0,48  | 1,39  | 0,38269 | NM_003516       | RNF5         |
| 8118535 | -0,11 | -1,08 | 0,74918 | 1,11  | 2,15  | 0,00661 | NM_006913       | RNF5         |
| 8179472 | -0,11 | -1,08 | 0,74918 | 1,11  | 2,15  | 0,00661 | NM_006913       | LOC100129566 |
| 8106352 | -0,11 | -1,08 | 0,80956 | -0,59 | -1,50 | 0,06181 | XM_001722314    | RCCD1        |
| 7986186 | -0,11 | -1,08 | 0,53884 | 1,58  | 2,99  | 0,01276 | NM_033544       | ZFYVE19      |
| 7982812 | -0,12 | -1,08 | 0,11772 | 2,27  | 4,84  | 0,00066 | NM_001077268    | TM4SF20      |
| 8059525 | -0,12 | -1,08 | 0,71176 | -0,12 | -1,09 | 0,39738 | NM_024795       | ZNF323       |
| 8124562 | -0,12 | -1,08 | 0,68459 | -0,74 | -1,67 | 0,08461 | NM_001135215    | STAG3L4      |
| 8133215 | -0,12 | -1,08 | 0,66852 | 2,49  | 5,61  | 0,00107 | NM_022906       | GRIPAP1      |
| 8172504 | -0,12 | -1,08 | 0,76597 | 0,65  | 1,57  | 0,07275 | NM_020137       | C1RL         |
| 7960757 | -0,12 | -1,08 | 0,83756 | 1,86  | 3,64  | 0,00692 | NM_016546       | OLAH         |
| 7926334 | -0,12 | -1,08 | 0,50773 | -0,68 | -1,60 | 0,02691 | NM_018324       | RBM34        |
| 7925184 | -0,12 | -1,08 | 0,79648 | 0,89  | 1,85  | 0,02673 | NM_015014       | ROGDI        |
| 7999217 | -0,12 | -1,08 | 0,73084 | 0,92  | 1,90  | 0,01475 | NM_024589       | ---          |
| 7994570 | -0,12 | -1,08 | 0,89906 | -2,63 | -6,19 | 0,00023 | ---             | THTPA        |
| 7973427 | -0,12 | -1,08 | 0,70461 | 0,28  | 1,22  | 0,53550 | NM_024328       | SLC36A3      |
| 8115274 | -0,12 | -1,08 | 0,80390 | -0,59 | -1,50 | 0,02374 | NM_001145017    | HIST2H2AC    |
| 7905088 | -0,12 | -1,08 | 0,72371 | -0,39 | -1,31 | 0,02652 | NM_003517       | ELMO1        |
| 8139057 | -0,12 | -1,08 | 0,72800 | -1,19 | -2,28 | 0,05383 | NM_014800       | RNF8         |
| 8119184 | -0,12 | -1,08 | 0,75203 | 0,19  | 1,14  | 0,35733 | NM_003958       | SFTA2        |
| 8179709 | -0,12 | -1,08 | 0,84769 | -1,27 | -2,41 | 0,00062 | NM_205854       | FTHL3        |
| 8051133 | -0,12 | -1,08 | 0,84915 | -0,17 | -1,13 | 0,53742 | NR_002201       | PAQR3        |
| 8101237 | -0,12 | -1,08 | 0,73046 | 1,23  | 2,35  | 0,01119 | NM_001040202    | ---          |
| 7931029 | -0,12 | -1,08 | 0,78981 | -1,06 | -2,08 | 0,00021 | ---             | MIR15B       |
| 8083737 | -0,12 | -1,08 | 0,60819 | -0,80 | -1,74 | 0,01132 | NR_029663       | PPAPDC1A     |
| 7930980 | -0,12 | -1,08 | 0,64567 | -0,30 | -1,23 | 0,20507 | NM_001030059    | CCDC34       |
| 7947189 | -0,12 | -1,08 | 0,66613 | 0,41  | 1,33  | 0,22553 | NM_030771       | CNTNAP3      |
| 8155460 | -0,12 | -1,09 | 0,62618 | 0,15  | 1,11  | 0,34356 | NM_033655       | LOC152217    |
| 8084982 | -0,12 | -1,09 | 0,62302 | 1,28  | 2,43  | 0,03887 | NR_024388       | LOC728606    |
| 8022653 | -0,12 | -1,09 | 0,48338 | -0,57 | -1,49 | 0,02850 | NR_024259       | PLEKHA4      |
| 8038225 | -0,12 | -1,09 | 0,66614 | -1,28 | -2,42 | 0,01946 | NM_020904       | RNF44        |
| 8115927 | -0,12 | -1,09 | 0,64426 | 2,02  | 4,06  | 0,00329 | NM_014901       | SETD8        |
| 7972973 | -0,12 | -1,09 | 0,83581 | -0,46 | -1,37 | 0,29306 | AF287261        | C1orf61      |
| 7921003 | -0,12 | -1,09 | 0,84037 | -0,57 | -1,49 | 0,00585 | NM_006365       | C14orf93     |
| 7977868 | -0,12 | -1,09 | 0,55441 | -0,72 | -1,64 | 0,05443 | NM_021944       | C20orf191    |
| 8005733 | -0,12 | -1,09 | 0,88109 | 0,11  | 1,08  | 0,87500 | NR_003678       | FAM46C       |
| 7904361 | -0,12 | -1,09 | 0,83402 | 0,27  | 1,21  | 0,32524 | NM_017709       | ULBP2        |
| 8122720 | -0,12 | -1,09 | 0,90162 | 0,29  | 1,22  | 0,44825 | NM_025217       | MAP1S        |
| 8026821 | -0,12 | -1,09 | 0,47532 | 0,55  | 1,46  | 0,46391 | NM_018174       | EFNB1        |

|                                                                                                          |       |       |         |       |        |         |              |                           |
|----------------------------------------------------------------------------------------------------------|-------|-------|---------|-------|--------|---------|--------------|---------------------------|
| 8168045                                                                                                  | -0,12 | -1,09 | 0,66026 | 0,59  | 1,50   | 0,03991 | NM_004429    | DNA2                      |
| 7934026                                                                                                  | -0,12 | -1,09 | 0,66323 | 1,80  | 3,48   | 0,01014 | NM_001080449 | ---                       |
| 7917180                                                                                                  | -0,12 | -1,09 | 0,89797 | -0,47 | -1,38  | 0,36017 | ---          | KDM1B                     |
| 8117081                                                                                                  | -0,12 | -1,09 | 0,63333 | 1,59  | 3,01   | 0,00056 | NM_153042    | ZNF560                    |
| 8033767                                                                                                  | -0,12 | -1,09 | 0,53306 | 3,32  | 9,97   | 0,00011 | NM_152476    | LRRN1                     |
| 8077366                                                                                                  | -0,12 | -1,09 | 0,58452 | -0,62 | -1,54  | 0,13053 | NM_020873    | DNAJC9                    |
| 7934320                                                                                                  | -0,12 | -1,09 | 0,76418 | -0,06 | -1,04  | 0,90783 | NM_015190    | ---                       |
| 8089013                                                                                                  | -0,12 | -1,09 | 0,61290 | 0,30  | 1,23   | 0,20997 | ---          | STAC                      |
| 8078529                                                                                                  | -0,12 | -1,09 | 0,71477 | -1,05 | -2,07  | 0,00039 | NM_003149    | TTC5                      |
| 7977482                                                                                                  | -0,12 | -1,09 | 0,23120 | 1,16  | 2,23   | 0,00295 | NM_138376    | B4GALT7                   |
| 8110399                                                                                                  | -0,12 | -1,09 | 0,63019 | -0,32 | -1,25  | 0,23252 | NM_007255    | ARID3A                    |
| 8024078                                                                                                  | -0,12 | -1,09 | 0,65538 | -0,04 | -1,02  | 0,93346 | NM_005224    | ASAP3                     |
| 7913609                                                                                                  | -0,12 | -1,09 | 0,70315 | -0,21 | -1,16  | 0,57639 | NM_017707    | C14orf128                 |
| 7978538                                                                                                  | -0,12 | -1,09 | 0,73869 | 2,12  | 4,35   | 0,00170 | NR_027263    | ZNF384                    |
| 7953390                                                                                                  | -0,12 | -1,09 | 0,70932 | -0,30 | -1,23  | 0,48676 | NM_001039916 | PLEKHH1                   |
| 7975238                                                                                                  | -0,12 | -1,09 | 0,59474 | 1,56  | 2,95   | 0,00314 | NM_020715    | PICK1                     |
| 8072989                                                                                                  | -0,12 | -1,09 | 0,75864 | 2,31  | 4,96   | 0,00011 | NM_012407    | ---                       |
| 8003771                                                                                                  | -0,12 | -1,09 | 0,75959 | -0,90 | -1,86  | 0,00152 | ---          | ULK3                      |
| 7990400                                                                                                  | -0,12 | -1,09 | 0,81664 | 1,52  | 2,87   | 0,02883 | NM_001099436 | C1orf228                  |
| 7900999                                                                                                  | -0,12 | -1,09 | 0,70785 | 0,25  | 1,19   | 0,37960 | NM_001145636 | B3GNT1                    |
| 7949615                                                                                                  | -0,12 | -1,09 | 0,75765 | 1,31  | 2,47   | 0,16147 | NM_006876    | HSP90B3P                  |
| 7902930                                                                                                  | -0,12 | -1,09 | 0,66388 | -0,19 | -1,14  | 0,74136 | NR_003130    | 01. Mrz                   |
| 8103508                                                                                                  | -0,12 | -1,09 | 0,72143 | -0,80 | -1,74  | 0,00917 | NM_017923    | GPS2                      |
| 8012150                                                                                                  | -0,12 | -1,09 | 0,55290 | -0,30 | -1,23  | 0,51374 | NM_004489    | C19orf18                  |
| 8039713                                                                                                  | -0,12 | -1,09 | 0,62911 | -0,44 | -1,35  | 0,16817 | BC033933     | SYTL4                     |
| 8173955                                                                                                  | -0,12 | -1,09 | 0,28430 | 0,41  | 1,33   | 0,01687 | NM_080737    | PGLS                      |
| 8026780                                                                                                  | -0,12 | -1,09 | 0,59713 | -0,51 | -1,43  | 0,09771 | NM_012088    | ARAP3                     |
| 8114733                                                                                                  | -0,13 | -1,09 | 0,27471 | 0,00  | 1,00   | 0,99293 | NM_022481    | IMPG2                     |
| 8089185                                                                                                  | -0,13 | -1,09 | 0,73551 | -1,31 | -2,47  | 0,03418 | NM_016247    | RACGAP1P //               |
| RACGAP1P // RACGAP1P |       |       |         |       |        |         |              |                           |
| 7962487                                                                                                  | -0,13 | -1,09 | 0,23412 | 1,01  | 2,01   | 0,04697 | NR_026583    | // NR_026583 // NR_026583 |
| // NR_026583 // NR_026583 // NR_026583 // NR_026583 // NR_026583 // NR_026583                            |       |       |         |       |        |         |              |                           |
| 8160587                                                                                                  | -0,13 | -1,09 | 0,79473 | 0,51  | 1,42   | 0,34525 | NM_002493    | TMX4                      |
| 8064939                                                                                                  | -0,13 | -1,09 | 0,78034 | 0,48  | 1,39   | 0,27122 | NM_021156    | HMOX1                     |
| 8072678                                                                                                  | -0,13 | -1,09 | 0,84514 | 0,03  | 1,02   | 0,92526 | NM_002133    | BAD                       |
| 7949067                                                                                                  | -0,13 | -1,09 | 0,59835 | 0,27  | 1,20   | 0,59886 | NM_004322    | CDC45                     |
| 8071212                                                                                                  | -0,13 | -1,09 | 0,75888 | 2,71  | 6,56   | 0,00514 | NM_001178010 | C7orf11                   |
| 8139203                                                                                                  | -0,13 | -1,09 | 0,45542 | 0,34  | 1,27   | 0,32317 | NM_138701    | LCP1                      |
| 7971461                                                                                                  | -0,13 | -1,09 | 0,72458 | -0,88 | -1,85  | 0,14289 | NM_002298    | ---                       |
| 7937913                                                                                                  | -0,13 | -1,09 | 0,80587 | -1,40 | -2,64  | 0,05070 | ---          | OR5E1P                    |
| 7938261                                                                                                  | -0,13 | -1,09 | 0,73345 | -1,29 | -2,45  | 0,00024 | NR_027711    | DUSP5                     |
| 7930413                                                                                                  | -0,13 | -1,09 | 0,60919 | 2,16  | 4,46   | 0,06785 | NM_004419    | MCEE                      |
| 8052934                                                                                                  | -0,13 | -1,09 | 0,75915 | -0,33 | -1,26  | 0,01016 | NM_032601    | ---                       |
| 7970563                                                                                                  | -0,13 | -1,09 | 0,22002 | -0,29 | -1,22  | 0,04805 | ---          | RRAD                      |
| 8001918                                                                                                  | -0,13 | -1,09 | 0,35032 | -0,86 | -1,81  | 0,00518 | NM_001128850 | SNX11                     |
| 8008096                                                                                                  | -0,13 | -1,09 | 0,74127 | 0,49  | 1,40   | 0,26552 | NM_152244    | ---                       |
| 8050873                                                                                                  | -0,13 | -1,09 | 0,74042 | -1,68 | -3,21  | 0,00234 | ---          | RNASE3                    |
| 7973105                                                                                                  | -0,13 | -1,09 | 0,74838 | -1,38 | -2,60  | 0,06164 | NM_002935    | FLJ10661                  |
| 8144498                                                                                                  | -0,13 | -1,09 | 0,74982 | -0,41 | -1,33  | 0,56921 | NR_024362    | POLR1A                    |
| 8053496                                                                                                  | -0,13 | -1,09 | 0,71007 | 1,62  | 3,08   | 0,00565 | NM_015425    | SVOP                      |
| 7966172                                                                                                  | -0,13 | -1,09 | 0,65190 | -1,18 | -2,26  | 0,02868 | NM_018711    | LRRC34                    |
| 8092009                                                                                                  | -0,13 | -1,09 | 0,27736 | 1,28  | 2,42   | 0,07019 | NM_001172779 | TEAD4                     |
| 7953150                                                                                                  | -0,13 | -1,09 | 0,44887 | 1,40  | 2,63   | 0,02736 | NM_003213    | ---                       |
| 8057931                                                                                                  | -0,13 | -1,09 | 0,60674 | -0,57 | -1,48  | 0,02888 | ---          | C11orf31                  |
| 7940070                                                                                                  | -0,13 | -1,09 | 0,74496 | -1,06 | -2,08  | 0,01109 | NM_170746    | SHPK                      |
| 8011396                                                                                                  | -0,13 | -1,09 | 0,73261 | 0,99  | 1,99   | 0,02593 | NM_013276    | OR5P3                     |
| 7946326                                                                                                  | -0,13 | -1,09 | 0,60741 | -1,40 | -2,65  | 0,04991 | NM_153445    | VPS33B                    |
| 7991427                                                                                                  | -0,13 | -1,09 | 0,80529 | 1,72  | 3,30   | 0,00536 | NM_018668    | FMNL3                     |
| 7963092                                                                                                  | -0,13 | -1,09 | 0,68665 | -0,02 | -1,01  | 0,93435 | NM_175736    | CFHR2                     |
| 7908496                                                                                                  | -0,13 | -1,09 | 0,80040 | -0,79 | -1,73  | 0,14766 | NM_005666    | OR6S1                     |
| 7977609                                                                                                  | -0,13 | -1,09 | 0,61310 | -1,08 | -2,12  | 0,00208 | NM_001001968 | LPHN3                     |
| 8095303                                                                                                  | -0,13 | -1,09 | 0,22947 | -1,06 | -2,09  | 0,05395 | NM_015236    | MAN1B1                    |
| 8159566                                                                                                  | -0,13 | -1,10 | 0,59481 | -0,02 | -1,01  | 0,97546 | NM_016219    | GOLGA6L1                  |
| 7986741                                                                                                  | -0,13 | -1,10 | 0,87566 | -1,51 | -2,85  | 0,03605 | NM_001001413 | ZNF17                     |
| 8031744                                                                                                  | -0,13 | -1,10 | 0,03482 | 0,20  | 1,15   | 0,34067 | NM_006959    | GAGE12C                   |
| 8167560                                                                                                  | -0,13 | -1,10 | 0,93789 | -3,79 | -13,79 | 0,04517 | NM_001098408 | AKAP7                     |
| 8122045                                                                                                  | -0,13 | -1,10 | 0,67899 | -0,03 | -1,02  | 0,86318 | NM_016377    | ---                       |
| 8061645                                                                                                  | -0,13 | -1,10 | 0,41271 | -1,64 | -3,12  | 0,00682 | ---          | LOC100132147              |
| 7898407                                                                                                  | -0,13 | -1,10 | 0,84867 | -1,21 | -2,32  | 0,08563 | BC036435     | ---                       |
| 8074640                                                                                                  | -0,13 | -1,10 | 0,58032 | -1,13 | -2,19  | 0,00552 | ---          | PKNOX2                    |
| 7944955                                                                                                  | -0,13 | -1,10 | 0,72596 | -1,27 | -2,41  | 0,00221 | NM_022062    | KIAA1958                  |
| 8157246                                                                                                  | -0,13 | -1,10 | 0,75767 | 2,42  | 5,35   | 0,00121 | BC105048     | GIMAP5                    |
| 8137257                                                                                                  | -0,13 | -1,10 | 0,63494 | -0,73 | -1,66  | 0,01020 | NM_018384    | ZDHHC8                    |

|         |       |       |         |       |       |         |                 |              |
|---------|-------|-------|---------|-------|-------|---------|-----------------|--------------|
| 8071339 | -0,13 | -1,10 | 0,48928 | 1,19  | 2,28  | 0,06918 | NM_013373       | PAQR7        |
| 7913858 | -0,13 | -1,10 | 0,75532 | -0,39 | -1,31 | 0,24981 | NM_178422       | ---          |
| 8068549 | -0,13 | -1,10 | 0,48425 | -0,90 | -1,87 | 0,12158 | ---             | ARL6IP4      |
| 7959549 | -0,13 | -1,10 | 0,82784 | 0,63  | 1,54  | 0,09404 | NM_001002252    | ---          |
| 8088915 | -0,13 | -1,10 | 0,74708 | -0,38 | -1,30 | 0,38437 | ---             | ---          |
| 8112892 | -0,13 | -1,10 | 0,80105 | 0,04  | 1,03  | 0,91324 | ---             | TIGD2        |
| 8096411 | -0,13 | -1,10 | 0,76736 | 0,34  | 1,27  | 0,22331 | NM_145715       | FHIT         |
| 8088458 | -0,13 | -1,10 | 0,74270 | 1,19  | 2,29  | 0,07469 | NM_002012       | UBE2CBP      |
| 8127824 | -0,13 | -1,10 | 0,72395 | 0,79  | 1,73  | 0,00175 | NM_198920       | OTUD7A       |
| 7982294 | -0,13 | -1,10 | 0,75310 | -0,32 | -1,24 | 0,32072 | NM_130901       | HEXIM2       |
| 8007750 | -0,13 | -1,10 | 0,57534 | 1,19  | 2,28  | 0,00856 | NM_144608       | CATSPER3     |
| 8108182 | -0,13 | -1,10 | 0,53475 | -0,21 | -1,16 | 0,51015 | NM_178019       | PYCR1        |
| 8153459 | -0,13 | -1,10 | 0,74592 | 1,09  | 2,12  | 0,03293 | NM_023078       | ZNF7         |
| 8148941 | -0,13 | -1,10 | 0,48854 | 1,06  | 2,08  | 0,00677 | NM_003416       | TBC1D3P2     |
| 8017173 | -0,13 | -1,10 | 0,83496 | 0,69  | 1,62  | 0,24787 | NR_027486       | DBN1         |
| 8116051 | -0,13 | -1,10 | 0,45392 | 0,79  | 1,73  | 0,16992 | NM_080881       | ZBTB45       |
| 8039791 | -0,13 | -1,10 | 0,47104 | 0,63  | 1,55  | 0,04932 | NM_032792       | AGAP5        |
| 7927353 | -0,13 | -1,10 | 0,81825 | 2,45  | 5,46  | 0,00003 | NM_001144000    | AGAP5        |
| 7933331 | -0,13 | -1,10 | 0,81825 | 2,45  | 5,46  | 0,00003 | NM_001144000    | ADCY6        |
| 7962842 | -0,13 | -1,10 | 0,59134 | 1,27  | 2,41  | 0,07554 | NM_015270       | HELLS        |
| 7929438 | -0,13 | -1,10 | 0,54427 | 1,99  | 3,96  | 0,00008 | NM_018063       | KEAP1        |
| 8034034 | -0,13 | -1,10 | 0,46426 | -0,25 | -1,19 | 0,52957 | NM_203500       | PSMD9        |
| 7959322 | -0,14 | -1,10 | 0,68952 | 0,80  | 1,74  | 0,19955 | NM_002813       | FUNDC1       |
| 8172244 | -0,14 | -1,10 | 0,72094 | 0,32  | 1,24  | 0,26637 | NM_173794       | IFT172       |
| 8051135 | -0,14 | -1,10 | 0,36806 | 0,08  | 1,06  | 0,38272 | NM_015662       | NM_015662    |
| 8140196 | -0,14 | -1,10 | 0,84467 | 1,39  | 2,63  | 0,01429 | NM_001025202    | ---          |
| 8056794 | -0,14 | -1,10 | 0,50391 | -0,68 | -1,60 | 0,01966 | ---             | CP           |
| 8091385 | -0,14 | -1,10 | 0,75105 | 0,62  | 1,54  | 0,15417 | NM_000096       | KAZ          |
| 7898084 | -0,14 | -1,10 | 0,50407 | 0,04  | 1,03  | 0,91226 | NM_015209       | PRPH2        |
| 8126436 | -0,14 | -1,10 | 0,46597 | -1,30 | -2,46 | 0,00910 | NM_000322       | ZNF606       |
| 8039719 | -0,14 | -1,10 | 0,29111 | -0,32 | -1,24 | 0,03784 | NM_025027       | LOC100127951 |
| 7997166 | -0,14 | -1,10 | 0,46493 | -0,65 | -1,56 | 0,02068 | AY358233        | NUDT9        |
| 8096251 | -0,14 | -1,10 | 0,56996 | 0,48  | 1,40  | 0,02153 | NM_024047       | SIP1         |
| 7974054 | -0,14 | -1,10 | 0,77805 | 0,68  | 1,60  | 0,13209 | NM_003616       | SUFU         |
| 7930120 | -0,14 | -1,10 | 0,63010 | 0,70  | 1,62  | 0,00443 | NM_016169       | OR4C45       |
| 7948039 | -0,14 | -1,10 | 0,68025 | -1,25 | -2,37 | 0,00095 | NM_001005513    | FASTKD1      |
| 8056693 | -0,14 | -1,10 | 0,17228 | 1,76  | 3,38  | 0,00200 | NM_024622       | LOC387790    |
| 7942647 | -0,14 | -1,10 | 0,86718 | 0,26  | 1,20  | 0,68678 | ENST00000321844 | SLC16A6      |
| 8017843 | -0,14 | -1,10 | 0,73318 | 0,88  | 1,85  | 0,04423 | NM_001174166    | ---          |
| 8081452 | -0,14 | -1,10 | 0,56164 | -0,77 | -1,71 | 0,00256 | ---             | HMGNS5       |
| 8173812 | -0,14 | -1,10 | 0,54598 | -0,60 | -1,52 | 0,21516 | NM_030763       | ---          |
| 7998835 | -0,14 | -1,10 | 0,67774 | -1,26 | -2,40 | 0,10935 | ---             | MZF1         |
| 8039809 | -0,14 | -1,10 | 0,48208 | 0,33  | 1,26  | 0,59558 | NM_198055       | CFHR5        |
| 7908499 | -0,14 | -1,10 | 0,74839 | -1,10 | -2,15 | 0,03534 | NM_030787       | HSD17B3      |
| 8162570 | -0,14 | -1,10 | 0,20125 | -0,17 | -1,13 | 0,73239 | NM_000197       | SART1        |
| 7941478 | -0,14 | -1,10 | 0,40727 | 0,69  | 1,61  | 0,16084 | NM_005146       | PDXK         |
| 8068919 | -0,14 | -1,10 | 0,56658 | 1,19  | 2,29  | 0,04869 | NM_003681       | C14orf21     |
| 7973679 | -0,14 | -1,10 | 0,65336 | -0,47 | -1,38 | 0,52093 | NM_174913       | CXorf21      |
| 8171896 | -0,14 | -1,10 | 0,51492 | -0,92 | -1,89 | 0,01505 | NM_025159       | FLI42393     |
| 8084739 | -0,14 | -1,10 | 0,71736 | -1,69 | -3,24 | 0,00694 | NR_024413       | PIGZ         |
| 8093166 | -0,14 | -1,10 | 0,50609 | 1,99  | 3,98  | 0,00135 | NM_025163       | EP400NL      |
| 7960054 | -0,14 | -1,10 | 0,59243 | -0,55 | -1,47 | 0,07613 | NR_003290       | L1CAM        |
| 8175871 | -0,14 | -1,10 | 0,48432 | -0,78 | -1,72 | 0,06432 | NM_000425       | MIR1247      |
| 7981326 | -0,14 | -1,10 | 0,63258 | -1,75 | -3,35 | 0,01505 | NR_031649       | URB2         |
| 7910416 | -0,14 | -1,10 | 0,74957 | 2,08  | 4,23  | 0,00002 | NM_014777       | ---          |
| 7940110 | -0,14 | -1,10 | 0,62925 | -0,98 | -1,97 | 0,04941 | ---             | ---          |
| 8167198 | -0,14 | -1,10 | 0,59607 | -0,19 | -1,14 | 0,47599 | ---             | C14orf43     |
| 7980051 | -0,14 | -1,10 | 0,50837 | 1,06  | 2,08  | 0,01798 | NM_194278       | GATSL3       |
| 8075322 | -0,14 | -1,10 | 0,24284 | 2,34  | 5,05  | 0,01018 | NM_001037666    | ---          |
| 8035939 | -0,14 | -1,10 | 0,69286 | -0,33 | -1,26 | 0,09641 | ---             | ARLSA        |
| 8055862 | -0,14 | -1,10 | 0,62780 | 0,40  | 1,32  | 0,31359 | NM_012097       | CDR2L        |
| 8009721 | -0,14 | -1,10 | 0,67899 | 0,75  | 1,68  | 0,19624 | NM_014603       | TRIM10       |
| 8178338 | -0,14 | -1,10 | 0,80003 | -1,84 | -3,58 | 0,00067 | NM_006778       | TTC30A       |
| 8056999 | -0,14 | -1,10 | 0,82709 | 0,36  | 1,29  | 0,31490 | NM_152275       | KLHDC8B      |
| 8079733 | -0,14 | -1,10 | 0,77340 | 0,67  | 1,59  | 0,42293 | NM_173546       | KIAA1328     |
| 8021001 | -0,14 | -1,10 | 0,43361 | 0,60  | 1,52  | 0,06617 | NM_020776       | GCFC1        |
| 8070046 | -0,14 | -1,10 | 0,69544 | 1,23  | 2,35  | 0,02926 | NM_016631       | ---          |
| 8019958 | -0,14 | -1,10 | 0,24482 | -0,99 | -1,99 | 0,01779 | ---             | AMY2B        |
| 7903407 | -0,14 | -1,10 | 0,75304 | -0,47 | -1,39 | 0,28590 | NM_020978       | ---          |
| 7915329 | -0,14 | -1,10 | 0,67839 | -1,12 | -2,17 | 0,01008 | ---             | NEUROD4      |
| 7955974 | -0,14 | -1,10 | 0,73917 | -1,30 | -2,46 | 0,01269 | NM_021191       | CTSS         |
| 7919800 | -0,14 | -1,10 | 0,61650 | 0,24  | 1,18  | 0,49220 | NM_004079       | ARHGAP6      |
| 8171313 | -0,14 | -1,10 | 0,61585 | -1,69 | -3,22 | 0,00179 | NM_013427       | PPP1R3A      |

|         |       |       |         |       |        |         |                      |                |
|---------|-------|-------|---------|-------|--------|---------|----------------------|----------------|
| 8142435 | -0,14 | -1,10 | 0,53370 | -0,88 | -1,84  | 0,00316 | NM_002711            | HMMR           |
| 8109712 | -0,14 | -1,10 | 0,77067 | 1,35  | 2,54   | 0,01295 | NM_001142556         | OR56B1         |
| 7938049 | -0,14 | -1,10 | 0,58288 | -1,11 | -2,17  | 0,01058 | NM_001005180         | ADAMTS6        |
| 8112342 | -0,14 | -1,10 | 0,57482 | -0,59 | -1,51  | 0,03763 | NM_197941            | BSCL2          |
| 7948798 | -0,14 | -1,10 | 0,80297 | 0,08  | 1,06   | 0,75545 | NM_001130702         | C12orf51       |
| 7966488 | -0,14 | -1,10 | 0,67469 | 2,03  | 4,10   | 0,00029 | NM_001109662         | MAP3K3         |
| 8009183 | -0,14 | -1,10 | 0,64334 | 1,73  | 3,32   | 0,00508 | NM_203351            | NUDCD3         |
| 8139356 | -0,14 | -1,10 | 0,78772 | 0,99  | 1,99   | 0,03562 | NM_015332            | SERPIND1       |
| 8071420 | -0,14 | -1,10 | 0,53186 | -1,54 | -2,91  | 0,00823 | NM_000185            | MCHR1          |
| 8073296 | -0,14 | -1,10 | 0,66999 | -0,80 | -1,74  | 0,13384 | NM_005297            | ---            |
| 8109424 | -0,14 | -1,10 | 0,36151 | -0,60 | -1,51  | 0,03991 | --- OR52N1           | ---            |
| 7946107 | -0,14 | -1,10 | 0,83969 | -1,45 | -2,73  | 0,03734 | NM_001001913         | SLC9A4         |
| 8044067 | -0,14 | -1,10 | 0,50098 | -0,66 | -1,58  | 0,00856 | NM_001011552         | ---            |
| 8067901 | -0,14 | -1,10 | 0,61028 | -0,50 | -1,41  | 0,28411 | ---                  | ---            |
| 8149069 | -0,14 | -1,11 | 0,25000 | -0,36 | -1,28  | 0,01923 | ---                  | ---            |
| 8133623 | -0,14 | -1,11 | 0,79762 | -0,91 | -1,87  | 0,02136 | ---                  | ---            |
| 8139975 | -0,14 | -1,11 | 0,79762 | -0,91 | -1,87  | 0,02136 | --- ZBTB2            | ---            |
| 8130185 | -0,14 | -1,11 | 0,74521 | 1,06  | 2,09   | 0,01933 | NM_020861            | C20orf106      |
| 8063526 | -0,14 | -1,11 | 0,71477 | -1,08 | -2,12  | 0,26433 | NM_001012971         | UIMC1          |
| 8115978 | -0,14 | -1,11 | 0,65067 | 0,92  | 1,89   | 0,00028 | NM_016290            | TFIP11         |
| 8075089 | -0,14 | -1,11 | 0,58617 | 0,39  | 1,31   | 0,18268 | NM_001008697         | ---            |
| 8127999 | -0,14 | -1,11 | 0,51554 | -0,52 | -1,44  | 0,06936 | --- TUBB2C           | ---            |
| 8165498 | -0,15 | -1,11 | 0,38205 | -0,09 | -1,07  | 0,85557 | NM_006088            | ---            |
| 8122816 | -0,15 | -1,11 | 0,81623 | -0,46 | -1,38  | 0,04264 | --- FHL3             | ---            |
| 7915147 | -0,15 | -1,11 | 0,46574 | 0,08  | 1,06   | 0,69666 | NM_004468            | SCAND2         |
| 7985587 | -0,15 | -1,11 | 0,48642 | 0,47  | 1,39   | 0,05369 | NR_004859            | IGHA1 // IGHAI |
| 7981740 | -0,15 | -1,11 | 0,87926 | -3,70 | -12,96 | 0,00126 | BC073771 // BC073771 | CSRP2BP        |
| 8061138 | -0,15 | -1,11 | 0,50206 | 0,55  | 1,46   | 0,03743 | NM_020536            | ---            |
| 8150373 | -0,15 | -1,11 | 0,15880 | -0,75 | -1,68  | 0,00448 | --- INHBE            | ---            |
| 7956426 | -0,15 | -1,11 | 0,73789 | 0,51  | 1,43   | 0,00783 | NM_031479            | ---            |
| 7971899 | -0,15 | -1,11 | 0,63353 | -1,10 | -2,15  | 0,00962 | --- DYRK1B           | ---            |
| 8036763 | -0,15 | -1,11 | 0,80953 | -0,84 | -1,79  | 0,04085 | NM_004714            | C17orf69       |
| 8007803 | -0,15 | -1,11 | 0,64682 | 2,21  | 4,61   | 0,00107 | NR_026905            | ATP13A2        |
| 7912898 | -0,15 | -1,11 | 0,77664 | 1,60  | 3,03   | 0,03053 | NM_022089            | ZNF248         |
| 7933092 | -0,15 | -1,11 | 0,46646 | 0,36  | 1,29   | 0,22799 | NM_021045            | TDO2           |
| 8097991 | -0,15 | -1,11 | 0,77715 | -0,59 | -1,50  | 0,01543 | NM_005651            | EMCN           |
| 8101957 | -0,15 | -1,11 | 0,68290 | -1,01 | -2,01  | 0,02936 | NM_016242            | ---            |
| 8168408 | -0,15 | -1,11 | 0,66244 | -0,26 | -1,19  | 0,14419 | --- SNORA70B         | ---            |
| 8052524 | -0,15 | -1,11 | 0,65660 | -0,48 | -1,40  | 0,13726 | NR_003707            | HOXA5          |
| 8138735 | -0,15 | -1,11 | 0,65945 | 2,29  | 4,87   | 0,00202 | NM_019102            | C21orf87       |
| 8070386 | -0,15 | -1,11 | 0,69233 | -0,93 | -1,91  | 0,00078 | AF426265 ---         | ---            |
| 8135929 | -0,15 | -1,11 | 0,70723 | -0,92 | -1,89  | 0,18440 | --- THAP10           | ---            |
| 7990086 | -0,15 | -1,11 | 0,67442 | 1,01  | 2,01   | 0,06455 | NM_020147            | ZC3H8          |
| 8054664 | -0,15 | -1,11 | 0,32885 | 1,28  | 2,42   | 0,00239 | NM_032494            | PCDHB2         |
| 8108683 | -0,15 | -1,11 | 0,84162 | 0,49  | 1,41   | 0,13736 | NM_018936            | DNAJC4         |
| 7940891 | -0,15 | -1,11 | 0,43885 | 0,30  | 1,24   | 0,27029 | NM_005528            | ---            |
| 7965224 | -0,15 | -1,11 | 0,38691 | -0,87 | -1,83  | 0,04562 | --- PLA2G4C          | ---            |
| 8037970 | -0,15 | -1,11 | 0,69312 | 0,75  | 1,68   | 0,02807 | NM_003706            | WASH1          |
| 7998119 | -0,15 | -1,11 | 0,87733 | 1,27  | 2,40   | 0,00689 | NM_182905            | ADRBK2         |
| 8072015 | -0,15 | -1,11 | 0,71268 | 2,50  | 5,64   | 0,00096 | NM_005160            | CELF2          |
| 7926127 | -0,15 | -1,11 | 0,82813 | 2,16  | 4,48   | 0,00064 | NM_001025077         | DFFB           |
| 7897210 | -0,15 | -1,11 | 0,54274 | 0,97  | 1,96   | 0,07222 | NM_004402            | KCNS3          |
| 8040458 | -0,15 | -1,11 | 0,60729 | 0,10  | 1,07   | 0,85914 | NM_002252            | TMEM99         |
| 8007108 | -0,15 | -1,11 | 0,61896 | 2,09  | 4,26   | 0,01356 | NM_145274            | C15orf39       |
| 7984952 | -0,15 | -1,11 | 0,69496 | 1,40  | 2,64   | 0,02861 | NM_015492            | TTL12          |
| 8076569 | -0,15 | -1,11 | 0,52329 | 1,99  | 3,97   | 0,01791 | NM_015140            | ---            |
| 7931403 | -0,15 | -1,11 | 0,69835 | -1,04 | -2,05  | 0,00133 | --- TMEM22           | ---            |
| 8082905 | -0,15 | -1,11 | 0,23372 | 0,61  | 1,53   | 0,04690 | NM_025246            | ---            |
| 7930919 | -0,15 | -1,11 | 0,64467 | -0,26 | -1,20  | 0,01403 | --- ANKRD32          | ---            |
| 8106931 | -0,15 | -1,11 | 0,32350 | 0,25  | 1,19   | 0,34937 | NM_032290            | SS18L2         |
| 8079074 | -0,15 | -1,11 | 0,62354 | 1,41  | 2,65   | 0,05355 | NM_016305            | RAB6B          |
| 8090803 | -0,15 | -1,11 | 0,52602 | 1,77  | 3,41   | 0,01142 | NM_016577            | SLC35E4        |
| 8072374 | -0,15 | -1,11 | 0,56995 | -0,18 | -1,13  | 0,69345 | NM_001001479         | ---            |
| 8106532 | -0,15 | -1,11 | 0,79460 | -1,09 | -2,13  | 0,00261 | --- MRGPRX4          | ---            |
| 7938746 | -0,15 | -1,11 | 0,66172 | -1,04 | -2,05  | 0,00062 | NM_054032            | HTATSF1        |
| 8170166 | -0,15 | -1,11 | 0,66055 | 0,41  | 1,33   | 0,09436 | NM_014500            | BTBD9          |
| 8126121 | -0,15 | -1,11 | 0,58105 | 0,23  | 1,18   | 0,20722 | NM_052893            | AADAC          |
| 8083415 | -0,15 | -1,11 | 0,50006 | -0,15 | -1,11  | 0,63004 | NM_001086            | OTUB2          |
| 7976425 | -0,15 | -1,11 | 0,31701 | 1,82  | 3,53   | 0,02298 | NM_023112            | COX7A1         |
| 8036284 | -0,15 | -1,11 | 0,68453 | -1,43 | -2,69  | 0,00002 | NM_001864            | GRIA3          |
| 8169717 | -0,15 | -1,11 | 0,47457 | -1,08 | -2,12  | 0,00170 | NM_007325            | MFSD3          |
| 8148917 | -0,15 | -1,11 | 0,74214 | 1,84  | 3,59   | 0,06659 | NM_138431            | ---            |
| 8058969 | -0,15 | -1,11 | 0,74323 | -0,27 | -1,20  | 0,17286 | --- TUSC2            | ---            |

|         |       |       |         |       |       |         |              |              |
|---------|-------|-------|---------|-------|-------|---------|--------------|--------------|
| 8087634 | -0,15 | -1,11 | 0,58699 | 0,71  | 1,63  | 0,16018 | NM_007275    | FAM8A1       |
| 8117071 | -0,15 | -1,11 | 0,06422 | 1,55  | 2,92  | 0,02580 | NM_016255    | CAPN5        |
| 7942697 | -0,15 | -1,11 | 0,56200 | -0,48 | -1,40 | 0,26605 | NM_004055    | C12orf10     |
| 7955777 | -0,15 | -1,11 | 0,82263 | 2,83  | 7,12  | 0,00104 | NM_021640    | LMF1         |
| 7998381 | -0,15 | -1,11 | 0,39512 | 0,98  | 1,98  | 0,17469 | NM_022773    | ---          |
| 8164696 | -0,15 | -1,11 | 0,75856 | -1,18 | -2,27 | 0,06578 | ---          | FOXRED2      |
| 8075785 | -0,15 | -1,11 | 0,54866 | 0,95  | 1,93  | 0,02152 | NM_024955    | CCDC68       |
| 8023401 | -0,15 | -1,11 | 0,33813 | 1,17  | 2,25  | 0,01305 | NM_025214    | ZNF318       |
| 8126542 | -0,15 | -1,11 | 0,52600 | 1,91  | 3,76  | 0,00095 | NM_014345    | DYX1C1       |
| 7989055 | -0,15 | -1,11 | 0,62969 | -0,19 | -1,14 | 0,52641 | NM_130810    | NOD1         |
| 8138842 | -0,15 | -1,11 | 0,46194 | 0,72  | 1,64  | 0,04114 | NM_006092    | OTUD5        |
| 8172478 | -0,15 | -1,11 | 0,72208 | 0,44  | 1,36  | 0,05398 | NM_017602    | ---          |
| 7963863 | -0,15 | -1,11 | 0,68547 | -1,35 | -2,54 | 0,12797 | ---          | DNAH14       |
| 7910030 | -0,15 | -1,11 | 0,63499 | 1,10  | 2,15  | 0,10750 | NM_001145154 | P2RX6        |
| 8071489 | -0,15 | -1,11 | 0,67508 | -0,93 | -1,91 | 0,15703 | NM_005446    | ---          |
| 8044684 | -0,15 | -1,11 | 0,68773 | -1,13 | -2,19 | 0,03661 | ---          | PYCR1        |
| 8019316 | -0,15 | -1,11 | 0,73543 | 2,02  | 4,06  | 0,02068 | NM_006907    | AEN          |
| 7985767 | -0,15 | -1,11 | 0,70779 | 0,81  | 1,75  | 0,20907 | NM_022767    | H2BFWT       |
| 8174283 | -0,15 | -1,11 | 0,60593 | -0,50 | -1,41 | 0,23696 | NM_001002916 | ATP7B        |
| 7971731 | -0,15 | -1,11 | 0,59074 | -0,40 | -1,32 | 0,44171 | NM_000053    | ---          |
| 7954785 | -0,15 | -1,11 | 0,39137 | -0,52 | -1,44 | 0,00066 | ---          | ZNF395       |
| 8149986 | -0,15 | -1,11 | 0,49327 | 1,38  | 2,60  | 0,00586 | NM_018660    | GOLGA2       |
| 8164398 | -0,15 | -1,11 | 0,41088 | 0,66  | 1,58  | 0,10332 | NM_004486    | ---          |
| 7988442 | -0,15 | -1,11 | 0,39519 | -1,34 | -2,54 | 0,05385 | ---          | GAGE1        |
| 8167573 | -0,15 | -1,11 | 0,89393 | -0,31 | -1,24 | 0,76257 | NM_001468    | GMPPB        |
| 8087461 | -0,15 | -1,11 | 0,65531 | 0,33  | 1,26  | 0,34694 | NM_013334    | MEGF8        |
| 8029273 | -0,15 | -1,11 | 0,72589 | -0,40 | -1,32 | 0,22365 | NM_001410    | CST6         |
| 7941505 | -0,15 | -1,11 | 0,73642 | -0,13 | -1,09 | 0,76770 | NM_001323    | SERPINB4     |
| 8023688 | -0,15 | -1,11 | 0,76726 | -0,83 | -1,78 | 0,09782 | NM_002974    | ---          |
| 8097470 | -0,15 | -1,11 | 0,42423 | -0,80 | -1,74 | 0,03802 | ---          | WDR91        |
| 8143070 | -0,15 | -1,11 | 0,34108 | 1,04  | 2,06  | 0,01347 | NM_014149    | GLRX5        |
| 7976515 | -0,15 | -1,11 | 0,75409 | 1,26  | 2,39  | 0,16913 | NM_016417    | MOSPD3       |
| 8134880 | -0,15 | -1,11 | 0,59442 | 0,63  | 1,55  | 0,01423 | NM_023948    | ---          |
| 7969671 | -0,15 | -1,11 | 0,69223 | -0,52 | -1,43 | 0,16207 | ---          | SLC22A4      |
| 8107909 | -0,15 | -1,11 | 0,73216 | -0,25 | -1,19 | 0,00090 | NM_003059    | EPGN         |
| 8095723 | -0,15 | -1,11 | 0,63055 | -0,65 | -1,57 | 0,05976 | NM_001013442 | HIST1H3D     |
| 8124416 | -0,15 | -1,11 | 0,30646 | 0,40  | 1,32  | 0,08097 | NM_003530    | DEFB129      |
| 8060320 | -0,16 | -1,11 | 0,50910 | -1,00 | -2,00 | 0,01776 | NM_080831    | ---          |
| 8045007 | -0,16 | -1,11 | 0,45261 | -0,79 | -1,73 | 0,02976 | ---          | AKR1B10      |
| 8136336 | -0,16 | -1,11 | 0,86019 | -0,93 | -1,91 | 0,00600 | NM_020299    | ABCC10       |
| 8119801 | -0,16 | -1,11 | 0,31455 | 2,05  | 4,13  | 0,00751 | NM_033450    | NFE2L3       |
| 8131944 | -0,16 | -1,11 | 0,61572 | -0,30 | -1,23 | 0,40102 | NM_004289    | KIAA0226     |
| 8093230 | -0,16 | -1,11 | 0,49872 | 2,49  | 5,63  | 0,00171 | NM_001145642 | ---          |
| 8149315 | -0,16 | -1,11 | 0,56893 | -0,82 | -1,77 | 0,04433 | ---          | SGPP1        |
| 7979574 | -0,16 | -1,11 | 0,50696 | 0,25  | 1,19  | 0,54351 | NM_030791    | PTRH1        |
| 8164235 | -0,16 | -1,11 | 0,51245 | 0,24  | 1,18  | 0,44058 | NM_001002913 | ZBTB7A       |
| 8032755 | -0,16 | -1,11 | 0,75029 | 1,27  | 2,41  | 0,05686 | NM_015898    | CDNF         |
| 7932177 | -0,16 | -1,11 | 0,62990 | 1,00  | 2,00  | 0,00379 | NM_001029954 | MTHFS        |
| 7990810 | -0,16 | -1,11 | 0,58805 | 1,50  | 2,83  | 0,00900 | NM_006441    | ENTPD6       |
| 8061428 | -0,16 | -1,11 | 0,76741 | 1,04  | 2,05  | 0,10917 | NM_001247    | NETO1        |
| 8023828 | -0,16 | -1,11 | 0,52348 | -0,75 | -1,68 | 0,00872 | NM_138966    | GTSF1        |
| 7963817 | -0,16 | -1,12 | 0,60600 | -0,88 | -1,84 | 0,03285 | NM_144594    | PILRB        |
| 8134789 | -0,16 | -1,12 | 0,11656 | 1,30  | 2,46  | 0,00180 | NM_013440    | EPHX2        |
| 8145532 | -0,16 | -1,12 | 0,74287 | -0,25 | -1,19 | 0,47837 | NM_001979    | LCE3D        |
| 7920185 | -0,16 | -1,12 | 0,64775 | -1,19 | -2,28 | 0,00751 | NM_032563    | ---          |
| 8139765 | -0,16 | -1,12 | 0,70585 | -1,03 | -2,05 | 0,01780 | ---          | LOC100128868 |
| 8135585 | -0,16 | -1,12 | 0,49269 | 0,28  | 1,22  | 0,42159 | AY143171     | ---          |
| 8088908 | -0,16 | -1,12 | 0,22663 | -1,05 | -2,07 | 0,20189 | ---          | CCDC22       |
| 8167457 | -0,16 | -1,12 | 0,54811 | 0,16  | 1,12  | 0,29256 | NM_014008    | HIST2H3D     |
| 7919589 | -0,16 | -1,12 | 0,80110 | 1,45  | 2,73  | 0,00104 | NM_001123375 | RPTOR        |
| 8010512 | -0,16 | -1,12 | 0,75973 | 1,41  | 2,66  | 0,02010 | NM_020761    | ---          |
| 8154620 | -0,16 | -1,12 | 0,67343 | -0,96 | -1,95 | 0,02435 | ---          | WDR34        |
| 8164440 | -0,16 | -1,12 | 0,58277 | 1,16  | 2,23  | 0,01587 | NM_052844    | TCF19        |
| 8118086 | -0,16 | -1,12 | 0,43164 | 0,37  | 1,29  | 0,23040 | NM_007109    | TCF19        |
| 8177947 | -0,16 | -1,12 | 0,43164 | 0,37  | 1,29  | 0,23040 | NM_007109    | WDR18        |
| 8024089 | -0,16 | -1,12 | 0,77225 | 1,75  | 3,36  | 0,04257 | NM_024100    | FAM183B      |
| 8139160 | -0,16 | -1,12 | 0,86162 | -1,18 | -2,26 | 0,25789 | NR_028347    | DLL4         |
| 7982854 | -0,16 | -1,12 | 0,71102 | 1,04  | 2,06  | 0,05038 | NM_019074    | CHD7         |
| 8146579 | -0,16 | -1,12 | 0,15591 | 2,51  | 5,69  | 0,00003 | NM_017780    | HMG2         |
| 7899187 | -0,16 | -1,12 | 0,78583 | -0,49 | -1,40 | 0,11207 | NM_005517    | KRTAP20-4    |
| 8068157 | -0,16 | -1,12 | 0,80057 | -0,88 | -1,84 | 0,00206 | NR_023342    | ---          |
| 8171295 | -0,16 | -1,12 | 0,82032 | -1,52 | -2,87 | 0,00391 | ---          | NAIF1        |
| 8164357 | -0,16 | -1,12 | 0,53729 | 0,24  | 1,18  | 0,51042 | NM_197956    | MAGEA10      |

|         |       |       |         |       |       |         |                   |              |
|---------|-------|-------|---------|-------|-------|---------|-------------------|--------------|
| 8175690 | -0,16 | -1,12 | 0,63695 | -0,64 | -1,56 | 0,04530 | NM_001011543      | ZNF587       |
| 8031827 | -0,16 | -1,12 | 0,66031 | 0,72  | 1,65  | 0,01151 | NM_032828         | TRPC2        |
| 7937878 | -0,16 | -1,12 | 0,54115 | -1,18 | -2,26 | 0,03204 | NR_002720         | SIGLEC1      |
| 8064716 | -0,16 | -1,12 | 0,55748 | -0,58 | -1,49 | 0,03773 | NM_023068         | hCG_1983896  |
| 7999550 | -0,16 | -1,12 | 0,46111 | -0,47 | -1,38 | 0,03540 | ENST00000312019   | LRRFIP1      |
| 8049542 | -0,16 | -1,12 | 0,61654 | -0,45 | -1,36 | 0,11698 | NM_001137550      | SOX13        |
| 7908993 | -0,16 | -1,12 | 0,68076 | 0,56  | 1,47  | 0,25963 | NM_005686         | ---          |
| 7939374 | -0,16 | -1,12 | 0,66653 | -0,62 | -1,53 | 0,07180 | ---               | MC3R         |
| 8063476 | -0,16 | -1,12 | 0,72480 | -1,51 | -2,84 | 0,02157 | NM_019888         | RNF7         |
| 8083119 | -0,16 | -1,12 | 0,82514 | 1,46  | 2,74  | 0,01422 | NM_014245         | LOC100287934 |
| 7909990 | -0,16 | -1,12 | 0,13442 | -0,79 | -1,73 | 0,21140 | AK290103 CDCA7L   |              |
| 8138489 | -0,16 | -1,12 | 0,69266 | 3,33  | 10,09 | 0,00056 | NM_018719         | LRRC33       |
| 8084951 | -0,16 | -1,12 | 0,71818 | -0,93 | -1,90 | 0,00530 | NM_198565         | LHC84931     |
| 8054866 | -0,16 | -1,12 | 0,66667 | -1,23 | -2,34 | 0,00099 | NR_027181         | HIST1H2BJ    |
| 8124484 | -0,16 | -1,12 | 0,64641 | 0,52  | 1,43  | 0,38529 | NM_021058         | C19orf66     |
| 8025551 | -0,16 | -1,12 | 0,81177 | 0,14  | 1,10  | 0,79965 | NM_018381         | FAM194B      |
| 7971400 | -0,16 | -1,12 | 0,46122 | -0,95 | -1,93 | 0,00331 | NM_182542         | SNORD116-27  |
| 7982002 | -0,16 | -1,12 | 0,42601 | -0,92 | -1,89 | 0,02147 | NR_003341         | ---          |
| 8066027 | -0,16 | -1,12 | 0,27485 | -1,76 | -3,40 | 0,30018 | ---               | HSP90AA4P    |
| 8098707 | -0,16 | -1,12 | 0,36600 | -0,49 | -1,41 | 0,49379 | AY956760 SNORA16A |              |
| 7914216 | -0,16 | -1,12 | 0,65284 | 0,11  | 1,08  | 0,71828 | NR_003035         | OTOA         |
| 7993848 | -0,16 | -1,12 | 0,60805 | -1,23 | -2,35 | 0,01707 | NM_144672         | RPGR         |
| 8172056 | -0,16 | -1,12 | 0,49666 | 0,23  | 1,17  | 0,14632 | NM_000328         | ASB11        |
| 8171403 | -0,16 | -1,12 | 0,59687 | -0,88 | -1,84 | 0,01334 | NM_080873         | CCL7         |
| 8006440 | -0,16 | -1,12 | 0,31639 | -1,91 | -3,76 | 0,00416 | NM_006273         | DARS2        |
| 7907466 | -0,16 | -1,12 | 0,76590 | 1,84  | 3,57  | 0,00388 | NM_018122         | GNAT2        |
| 7918367 | -0,16 | -1,12 | 0,62759 | -0,07 | -1,05 | 0,81128 | NM_005272         | ATXN3L       |
| 8171348 | -0,16 | -1,12 | 0,66851 | -0,43 | -1,35 | 0,06719 | NM_001135995      | OR5K4        |
| 8081206 | -0,17 | -1,12 | 0,39517 | -0,72 | -1,65 | 0,02119 | NM_001005517      | C10orf131    |
| 7929525 | -0,17 | -1,12 | 0,12046 | -0,43 | -1,34 | 0,02392 | AK294399 TLE6     |              |
| 8024537 | -0,17 | -1,12 | 0,69545 | -0,10 | -1,08 | 0,66644 | NM_001143986      | FGF11        |
| 8004408 | -0,17 | -1,12 | 0,62978 | 2,12  | 4,33  | 0,00000 | NM_004112         | ANKRD11      |
| 8175585 | -0,17 | -1,12 | 0,93015 | 1,67  | 3,18  | 0,00680 | NM_013275         | NBPF3        |
| 7898679 | -0,17 | -1,12 | 0,64807 | 0,18  | 1,14  | 0,41321 | NM_032264         | MCART1       |
| 8161249 | -0,17 | -1,12 | 0,78193 | 0,35  | 1,28  | 0,08130 | NM_033412         | SNORD116-11  |
| 7981970 | -0,17 | -1,12 | 0,37501 | -0,81 | -1,75 | 0,01805 | NR_003326         | FKBP8        |
| 8035494 | -0,17 | -1,12 | 0,79985 | 1,48  | 2,79  | 0,01087 | NM_012181         | ---          |
| 8139113 | -0,17 | -1,12 | 0,54485 | -0,77 | -1,70 | 0,01927 | ---               | SYN1         |
| 8172317 | -0,17 | -1,12 | 0,66661 | -0,93 | -1,90 | 0,00412 | NM_006950         | TOM1L1       |
| 8008564 | -0,17 | -1,12 | 0,57154 | 0,53  | 1,44  | 0,18139 | AB065085 PLEKHJ1  |              |
| 8032455 | -0,17 | -1,12 | 0,34799 | 1,80  | 3,48  | 0,03246 | NM_018049         | KLRC1        |
| 7961187 | -0,17 | -1,12 | 0,24321 | -1,04 | -2,05 | 0,01555 | NM_213658         | CFHR3        |
| 7908481 | -0,17 | -1,12 | 0,53155 | -0,60 | -1,51 | 0,04016 | NM_021023         | ZNF667       |
| 8039593 | -0,17 | -1,12 | 0,67831 | -0,54 | -1,46 | 0,00630 | NM_022103         | SH3PXD2A     |
| 7936115 | -0,17 | -1,12 | 0,63737 | -0,66 | -1,58 | 0,00347 | NM_014631         | DDR1         |
| 8177867 | -0,17 | -1,12 | 0,74205 | 1,66  | 3,16  | 0,02859 | NM_013993         | IRG1         |
| 7969482 | -0,17 | -1,12 | 0,66858 | -1,04 | -2,05 | 0,07079 | ENST00000377462   | GNG5         |
| 7917232 | -0,17 | -1,12 | 0,66191 | 0,88  | 1,84  | 0,07074 | NM_005274         | IFIT1B       |
| 7929061 | -0,17 | -1,12 | 0,69340 | -0,74 | -1,67 | 0,08693 | NM_001010987      | ---          |
| 7956908 | -0,17 | -1,12 | 0,72996 | 3,33  | 10,04 | 0,00454 | ---               | LIMS1        |
| 8044258 | -0,17 | -1,12 | 0,88156 | 1,98  | 3,94  | 0,00559 | NM_004987         | C5orf53      |
| 8108475 | -0,17 | -1,12 | 0,40049 | -0,01 | -1,01 | 0,89533 | NM_001007189      | EID2B        |
| 8036744 | -0,17 | -1,12 | 0,64136 | 0,64  | 1,56  | 0,04913 | NM_152361         | DNAL1        |
| 7975616 | -0,17 | -1,12 | 0,67963 | 0,67  | 1,59  | 0,20365 | NM_031427         | KCNAB2       |
| 7897236 | -0,17 | -1,12 | 0,60808 | 1,86  | 3,62  | 0,00628 | NM_003636         | ---          |
| 8053427 | -0,17 | -1,12 | 0,89411 | -2,25 | -4,77 | 0,02167 | ---               | PGS1         |
| 8010271 | -0,17 | -1,12 | 0,49999 | 3,26  | 9,59  | 0,00490 | NM_024419         | NEIL3        |
| 8098423 | -0,17 | -1,12 | 0,72122 | 2,66  | 6,30  | 0,00982 | NM_018248         | XRCC4        |
| 8106730 | -0,17 | -1,12 | 0,75832 | 1,12  | 2,18  | 0,01403 | NM_022550         | ---          |
| 8052121 | -0,17 | -1,12 | 0,49605 | -0,87 | -1,83 | 0,02324 | ---               | LOC100131756 |
| 7915498 | -0,17 | -1,12 | 0,44499 | -1,01 | -2,01 | 0,03087 | AK096139 NMNAT1   |              |
| 7897509 | -0,17 | -1,12 | 0,67630 | 0,34  | 1,27  | 0,41176 | NM_022787         | NPHP1        |
| 8054486 | -0,17 | -1,12 | 0,26062 | 0,03  | 1,02  | 0,80567 | NM_000272         | C4orf22      |
| 8096061 | -0,17 | -1,12 | 0,64447 | -0,46 | -1,38 | 0,06065 | BC034296 ---      |              |
| 7909102 | -0,17 | -1,12 | 0,66793 | 0,15  | 1,11  | 0,69536 | ---               | FAM40B       |
| 8136115 | -0,17 | -1,12 | 0,62644 | 0,99  | 1,98  | 0,00254 | NM_020704         | FLG2         |
| 7920175 | -0,17 | -1,12 | 0,45725 | -0,96 | -1,95 | 0,00246 | NM_001014342      | SLC35E3      |
| 7956978 | -0,17 | -1,12 | 0,56617 | 1,01  | 2,01  | 0,00414 | NM_018656         | EBP          |
| 8167305 | -0,17 | -1,12 | 0,68810 | 2,96  | 7,77  | 0,00288 | NM_006579         | AMOT         |
| 8174576 | -0,17 | -1,13 | 0,43402 | 0,30  | 1,23  | 0,39170 | NM_133265         | MICAL3       |
| 8074286 | -0,17 | -1,13 | 0,51475 | 1,48  | 2,80  | 0,01341 | NM_015241         | ---          |
| 7991155 | -0,17 | -1,13 | 0,16818 | -1,12 | -2,18 | 0,00111 | ---               | ZNF781       |
| 8036430 | -0,17 | -1,13 | 0,46333 | 0,14  | 1,10  | 0,72015 | NM_152605         | NANP         |

|         |       |       |         |       |        |         |                 |              |
|---------|-------|-------|---------|-------|--------|---------|-----------------|--------------|
| 8065510 | -0,17 | -1,13 | 0,64464 | 0,27  | 1,20   | 0,09898 | NM_152667       | FOXO1        |
| 7971177 | -0,17 | -1,13 | 0,68524 | -0,42 | -1,34  | 0,17182 | NM_002015       | TIAM2        |
| 8122933 | -0,17 | -1,13 | 0,01392 | -0,35 | -1,27  | 0,25513 | NM_012454       | ADAM30       |
| 7919088 | -0,17 | -1,13 | 0,57019 | -0,86 | -1,82  | 0,06456 | NM_021794       | MIR504       |
| 8175455 | -0,17 | -1,13 | 0,71236 | -0,66 | -1,58  | 0,04778 | NR_030229       | ---          |
| 8040288 | -0,17 | -1,13 | 0,75418 | -1,42 | -2,68  | 0,01119 | ---             | CXorf40A     |
| 8170393 | -0,17 | -1,13 | 0,56021 | -0,51 | -1,43  | 0,20955 | NM_178124       | LOC644538    |
| 8170007 | -0,17 | -1,13 | 0,69414 | -1,25 | -2,38  | 0,00261 | NM_001163438    | MIR1977      |
| 7911339 | -0,17 | -1,13 | 0,89294 | -5,06 | -33,30 | 0,00034 | NR_031741       | MIR1977      |
| 8165698 | -0,17 | -1,13 | 0,89294 | -5,06 | -33,30 | 0,00034 | NR_031741       | PEX7         |
| 8122242 | -0,17 | -1,13 | 0,57570 | 0,74  | 1,67   | 0,00541 | NM_000288       | SPPL2B       |
| 8024446 | -0,17 | -1,13 | 0,63166 | 1,00  | 2,00   | 0,15050 | NM_001077238    | SMEK3P       |
| 8171883 | -0,17 | -1,13 | 0,45874 | -0,73 | -1,66  | 0,03108 | NR_002784       | CDKL3        |
| 8114171 | -0,17 | -1,13 | 0,14052 | -0,12 | -1,09  | 0,60939 | NM_001113575    | OR4D9        |
| 7940189 | -0,17 | -1,13 | 0,43351 | -1,25 | -2,38  | 0,13548 | NM_001004711    | ZNF660       |
| 8079198 | -0,17 | -1,13 | 0,58694 | -0,47 | -1,38  | 0,12289 | NM_173658       | RAB15        |
| 7979663 | -0,17 | -1,13 | 0,53577 | 2,88  | 7,37   | 0,00083 | NM_198686       | WNT3         |
| 8016311 | -0,17 | -1,13 | 0,74098 | 0,89  | 1,86   | 0,00669 | NM_030753       | CCDC29       |
| 7970381 | -0,17 | -1,13 | 0,77822 | 0,90  | 1,87   | 0,07161 | ENST00000340460 | COMP         |
| 8035517 | -0,17 | -1,13 | 0,31636 | -0,78 | -1,72  | 0,02348 | NM_000095       | SNORA67      |
| 8004508 | -0,17 | -1,13 | 0,51279 | 0,77  | 1,70   | 0,05091 | NR_002912       | NELF         |
| 8165552 | -0,17 | -1,13 | 0,61620 | 1,76  | 3,39   | 0,00070 | NM_001130969    | LIF          |
| 8072314 | -0,17 | -1,13 | 0,62936 | -0,39 | -1,31  | 0,29190 | NM_002309       | SMUG1        |
| 7963741 | -0,17 | -1,13 | 0,69634 | 2,20  | 4,61   | 0,00508 | NM_014311       | GZMA         |
| 8105340 | -0,17 | -1,13 | 0,22442 | -0,33 | -1,26  | 0,22292 | NM_006144       | CNTN1        |
| 7954899 | -0,17 | -1,13 | 0,63429 | 3,35  | 10,19  | 0,01342 | NM_001843       | ZNF565       |
| 8036291 | -0,17 | -1,13 | 0,68582 | -0,54 | -1,46  | 0,00991 | NM_001042474    | ---          |
| 8097934 | -0,17 | -1,13 | 0,65983 | -0,54 | -1,46  | 0,02001 | ---             | ZNF699       |
| 8033746 | -0,17 | -1,13 | 0,69276 | 0,48  | 1,39   | 0,12558 | NM_198535       | NKAIN3       |
| 8146625 | -0,17 | -1,13 | 0,43633 | -0,51 | -1,42  | 0,00148 | NM_173688       | SCAND3       |
| 8124594 | -0,17 | -1,13 | 0,44964 | 0,19  | 1,14   | 0,30902 | NM_052923       | IGLV7-46     |
| 8071658 | -0,17 | -1,13 | 0,35211 | -1,37 | -2,58  | 0,00859 | ENST00000390295 | SEMA3E       |
| 8140650 | -0,17 | -1,13 | 0,68290 | 0,54  | 1,45   | 0,23098 | NM_012431       | KLRC2        |
| 7961182 | -0,17 | -1,13 | 0,45082 | -1,18 | -2,26  | 0,00399 | NM_002260       | ZBTB8B       |
| 7899797 | -0,17 | -1,13 | 0,46519 | 0,29  | 1,22   | 0,29266 | NM_001145720    | FAM105B      |
| 8104580 | -0,18 | -1,13 | 0,72704 | 1,56  | 2,96   | 0,00010 | NM_138348       | ---          |
| 8069766 | -0,18 | -1,13 | 0,67777 | -0,14 | -1,10  | 0,38663 | ---             | SLC44A3      |
| 7903144 | -0,18 | -1,13 | 0,42829 | 2,64  | 6,25   | 0,00051 | NM_001114106    | ZNF676       |
| 8035825 | -0,18 | -1,13 | 0,46469 | -0,67 | -1,59  | 0,07651 | NM_001001411    | TRIM49       |
| 7943036 | -0,18 | -1,13 | 0,82373 | -2,28 | -4,85  | 0,00003 | NM_020358       | ---          |
| 7974164 | -0,18 | -1,13 | 0,43793 | -0,42 | -1,34  | 0,17738 | ---             | DBF4B        |
| 8007651 | -0,18 | -1,13 | 0,31939 | -0,14 | -1,10  | 0,42177 | NM_145663       | C9orf95      |
| 8161839 | -0,18 | -1,13 | 0,60403 | 1,07  | 2,10   | 0,00756 | NR_023352       | FKSG83       |
| 8117567 | -0,18 | -1,13 | 0,48224 | -0,83 | -1,78  | 0,00748 | NM_032030       | HIST1H2AI    |
| 8117580 | -0,18 | -1,13 | 0,61540 | 0,46  | 1,38   | 0,42591 | NM_003509       | GOLGA6L1     |
| 7986736 | -0,18 | -1,13 | 0,83301 | -1,57 | -2,96  | 0,03797 | NM_001001413    | KIF3C        |
| 8050894 | -0,18 | -1,13 | 0,59482 | 2,19  | 4,57   | 0,00178 | NM_002254       | IL12A        |
| 8083690 | -0,18 | -1,13 | 0,67314 | 0,08  | 1,06   | 0,77638 | NM_000882       | ---          |
| 8150842 | -0,18 | -1,13 | 0,50125 | -0,43 | -1,35  | 0,20842 | ---             | TBC1D3P2     |
| 8017346 | -0,18 | -1,13 | 0,70850 | 0,52  | 1,43   | 0,36487 | NR_027486       | THSD7A       |
| 8138231 | -0,18 | -1,13 | 0,60731 | -0,83 | -1,78  | 0,04059 | NM_015204       | FANCM        |
| 7974166 | -0,18 | -1,13 | 0,65920 | 1,10  | 2,14   | 0,05189 | NM_020937       | TLR1         |
| 8099834 | -0,18 | -1,13 | 0,13881 | -0,81 | -1,75  | 0,04120 | NM_003263       | LOC100128288 |
| 8012464 | -0,18 | -1,13 | 0,83623 | 1,59  | 3,01   | 0,03727 | NR_024447       | ABHD12B      |
| 7974288 | -0,18 | -1,13 | 0,58256 | -0,74 | -1,67  | 0,00888 | NM_181533       | IFFO2        |
| 7912994 | -0,18 | -1,13 | 0,60190 | 1,88  | 3,69   | 0,01952 | NM_001136265    | PDZD11       |
| 8173373 | -0,18 | -1,13 | 0,83074 | 0,10  | 1,07   | 0,70529 | NM_016484       | CALML6       |
| 7897026 | -0,18 | -1,13 | 0,78187 | -1,63 | -3,09  | 0,00024 | NM_138705       | MOGAT2       |
| 7942603 | -0,18 | -1,13 | 0,60508 | -1,05 | -2,07  | 0,04071 | NM_025098       | ---          |
| 8008491 | -0,18 | -1,13 | 0,58096 | -0,99 | -1,99  | 0,00025 | ---             | C10orf68     |
| 7926936 | -0,18 | -1,13 | 0,43431 | -0,64 | -1,56  | 0,05819 | NM_024688       | HSP90AB4P    |
| 7989245 | -0,18 | -1,13 | 0,66366 | 0,30  | 1,23   | 0,14538 | NR_002927       | UBQLNL       |
| 7946082 | -0,18 | -1,13 | 0,52407 | -1,07 | -2,10  | 0,00718 | NM_145053       | ANKRD20B     |
| 8155591 | -0,18 | -1,13 | 0,62894 | 0,38  | 1,30   | 0,33477 | NR_003366       | NPM1         |
| 8109975 | -0,18 | -1,13 | 0,62339 | -1,13 | -2,19  | 0,11090 | NM_001037738    | C1orf156     |
| 7922243 | -0,18 | -1,13 | 0,17731 | 0,44  | 1,36   | 0,17832 | NM_033418       | SIGLEC14     |
| 8038885 | -0,18 | -1,13 | 0,70442 | -2,04 | -4,12  | 0,00051 | NM_001098612    | ZCWPW1       |
| 8141498 | -0,18 | -1,13 | 0,29123 | -0,43 | -1,35  | 0,04084 | NM_017984       | ---          |
| 8111666 | -0,18 | -1,13 | 0,47872 | -2,13 | -4,37  | 0,04522 | ---             | ---          |
| 8167772 | -0,18 | -1,13 | 0,85522 | -2,44 | -5,42  | 0,02248 | ---             | FERMT1       |
| 8064904 | -0,18 | -1,13 | 0,56030 | 2,54  | 5,83   | 0,00116 | NM_017671       | CLPB         |
| 7950142 | -0,18 | -1,13 | 0,76355 | 1,21  | 2,31   | 0,03538 | NM_030813       | ---          |
| 8111253 | -0,18 | -1,13 | 0,53554 | -1,19 | -2,29  | 0,00068 | ---             | ---          |



|         |       |       |         |       |        |         |                |           |  |
|---------|-------|-------|---------|-------|--------|---------|----------------|-----------|--|
| 8072344 | -0,18 | -1,13 | 0,72487 | -0,19 | -1,14  | 0,59169 | ---            | LRTM1     |  |
| 8088174 | -0,18 | -1,13 | 0,46690 | -0,96 | -1,94  | 0,00103 | NM_020678      | ---       |  |
| 8068399 | -0,18 | -1,13 | 0,41691 | -1,37 | -2,59  | 0,00315 | ---            | OMD       |  |
| 8162388 | -0,18 | -1,13 | 0,42151 | -1,07 | -2,10  | 0,00078 | NM_005014      | ---       |  |
| 7923501 | -0,18 | -1,13 | 0,84229 | -1,01 | -2,02  | 0,05959 | ---            | ZNF41     |  |
| 8172307 | -0,18 | -1,13 | 0,27318 | 0,42  | 1,34   | 0,02443 | NM_007130      | BHLHB9    |  |
| 8168984 | -0,18 | -1,13 | 0,18159 | -0,07 | -1,05  | 0,79075 | NM_001142524   | OR5F1     |  |
| 7948115 | -0,18 | -1,13 | 0,75568 | -1,68 | -3,20  | 0,05680 | NM_003697      | HS3ST5    |  |
| 8129062 | -0,18 | -1,13 | 0,38739 | -0,53 | -1,44  | 0,02936 | NM_153612      | ZNF607    |  |
| 8036436 | -0,18 | -1,13 | 0,51843 | 1,96  | 3,90   | 0,00122 | NM_032689      | CDC20     |  |
| 7900699 | -0,18 | -1,13 | 0,70914 | 2,27  | 4,83   | 0,00198 | NM_001255      | OR2C1     |  |
| 7992889 | -0,18 | -1,13 | 0,06733 | -0,34 | -1,27  | 0,15974 | NM_012368      | ZNF514    |  |
| 8053775 | -0,18 | -1,13 | 0,47678 | -0,22 | -1,16  | 0,56209 | NM_032788      | IQCE      |  |
| 8131155 | -0,18 | -1,13 | 0,73079 | 0,25  | 1,19   | 0,31111 | NM_152558      | NTF3      |  |
| 7953284 | -0,18 | -1,14 | 0,58379 | -0,86 | -1,81  | 0,00340 | NM_002527      | ---       |  |
| 8022378 | -0,18 | -1,14 | 0,42253 | -0,59 | -1,51  | 0,02266 | ---            | ---       |  |
| 8017391 | -0,18 | -1,14 | 0,32543 | -0,30 | -1,23  | 0,24045 | ---            | LRRK2     |  |
| 7954810 | -0,18 | -1,14 | 0,51766 | -0,29 | -1,23  | 0,40701 | NM_198578      | DPYSL4    |  |
| 7931439 | -0,18 | -1,14 | 0,06103 | -0,79 | -1,73  | 0,00060 | NM_006426      | ---       |  |
| 8132705 | -0,18 | -1,14 | 0,43859 | -1,28 | -2,43  | 0,00535 | ---            | ---       |  |
| 8062693 | -0,18 | -1,14 | 0,48274 | 0,03  | 1,02   | 0,82963 | ---            | ---       |  |
| 8036881 | -0,18 | -1,14 | 0,74962 | -1,98 | -3,95  | 0,00069 | ---            | TAAR8     |  |
| 8122129 | -0,18 | -1,14 | 0,37730 | -1,24 | -2,35  | 0,02656 | NM_053278      | BCAM      |  |
| 8029489 | -0,18 | -1,14 | 0,29195 | 2,42  | 5,34   | 0,00890 | NM_005581      | C22orf40  |  |
| 8076749 | -0,18 | -1,14 | 0,72584 | 0,78  | 1,71   | 0,08618 | NM_207327      | NMBR      |  |
| 8129947 | -0,18 | -1,14 | 0,46356 | -0,77 | -1,71  | 0,03291 | NM_002511      | RNF31     |  |
| 7973584 | -0,18 | -1,14 | 0,60193 | 0,90  | 1,87   | 0,02214 | NM_017999      | AFMID     |  |
| 8010248 | -0,18 | -1,14 | 0,59722 | 1,23  | 2,35   | 0,03684 | NM_001010982   | ING5      |  |
| 8077226 | -0,18 | -1,14 | 0,58693 | 0,09  | 1,06   | 0,52815 | NM_032329      | SNRPF     |  |
| 7957649 | -0,18 | -1,14 | 0,34562 | 0,63  | 1,54   | 0,04004 | NM_003095      | ---       |  |
| 8083061 | -0,18 | -1,14 | 0,69325 | 0,42  | 1,33   | 0,04413 | ---            | LSM14B    |  |
| 8063814 | -0,18 | -1,14 | 0,02757 | 0,16  | 1,12   | 0,62245 | NM_144703      | MIR135A2  |  |
| 7957735 | -0,19 | -1,14 | 0,13478 | -0,73 | -1,66  | 0,00131 | NR_029678      | PSMC3IP   |  |
| 8015642 | -0,19 | -1,14 | 0,49088 | -0,32 | -1,25  | 0,36108 | NM_016556      | LRWD1     |  |
| 8135181 | -0,19 | -1,14 | 0,52631 | 0,33  | 1,25   | 0,30410 | NM_152892      | HARBI1    |  |
| 7947676 | -0,19 | -1,14 | 0,55335 | 0,00  | -1,00  | 0,99016 | NM_173811      | ---       |  |
| 8095626 | -0,19 | -1,14 | 0,54776 | -0,89 | -1,85  | 0,12966 | ---            | AQP9      |  |
| 7983910 | -0,19 | -1,14 | 0,37330 | -0,80 | -1,74  | 0,00959 | NM_020980      | LOR       |  |
| 7905563 | -0,19 | -1,14 | 0,49074 | -1,43 | -2,70  | 0,00072 | NM_000427      | CEP110    |  |
| 8157534 | -0,19 | -1,14 | 0,47307 | 1,08  | 2,11   | 0,09267 | NM_007018      | ZNF75A    |  |
| 7992887 | -0,19 | -1,14 | 0,26175 | 0,82  | 1,77   | 0,04031 | AK093979 OR3A3 |           |  |
| 8003812 | -0,19 | -1,14 | 0,80674 | -2,35 | -5,08  | 0,00744 | NM_012373      | ARPM1     |  |
| 8092002 | -0,19 | -1,14 | 0,53523 | -0,61 | -1,52  | 0,11285 | NM_032487      | OR1S1     |  |
| 7940114 | -0,19 | -1,14 | 0,65039 | -1,66 | -3,16  | 0,00383 | NM_001004458   | ---       |  |
| 8005829 | -0,19 | -1,14 | 0,46804 | -0,60 | -1,51  | 0,01284 | ---            | ---       |  |
| 8085058 | -0,19 | -1,14 | 0,53635 | 0,13  | 1,10   | 0,84007 | ---            | PARP11    |  |
| 7960383 | -0,19 | -1,14 | 0,58331 | -0,04 | -1,03  | 0,90330 | NM_020367      | CCDC41    |  |
| 7965486 | -0,19 | -1,14 | 0,02091 | 0,69  | 1,61   | 0,00073 | NM_016122      | GOLGA4    |  |
| 8086183 | -0,19 | -1,14 | 0,72487 | -0,80 | -1,74  | 0,12664 | NM_001172713   | ---       |  |
| 7970567 | -0,19 | -1,14 | 0,50845 | -0,50 | -1,42  | 0,04637 | ---            | C8orf46   |  |
| 8146703 | -0,19 | -1,14 | 0,32751 | 0,06  | 1,04   | 0,86159 | NM_152765      | TAF3      |  |
| 7926096 | -0,19 | -1,14 | 0,55798 | 0,02  | 1,02   | 0,89947 | NM_031923      | ---       |  |
| 8122598 | -0,19 | -1,14 | 0,76944 | -1,26 | -2,39  | 0,00005 | ---            | HMCN2     |  |
| 8158637 | -0,19 | -1,14 | 0,62863 | -1,39 | -2,62  | 0,00134 | AL834139 MUC1  |           |  |
| 7920642 | -0,19 | -1,14 | 0,82944 | 1,17  | 2,24   | 0,02119 | NM_001018016   | ESRRB     |  |
| 7975876 | -0,19 | -1,14 | 0,36674 | -1,21 | -2,32  | 0,01173 | NM_004452      | C1QTNF9   |  |
| 7968052 | -0,19 | -1,14 | 0,57733 | 0,25  | 1,19   | 0,25181 | NM_178540      | PNKP      |  |
| 8038458 | -0,19 | -1,14 | 0,62709 | -0,12 | -1,09  | 0,73517 | NM_007254      | IKBKG     |  |
| 8170955 | -0,19 | -1,14 | 0,56542 | 1,04  | 2,05   | 0,10931 | NM_001099857   | GLRX5     |  |
| 8169709 | -0,19 | -1,14 | 0,90176 | 1,18  | 2,27   | 0,38149 | NM_016417      | HIST1H2BA |  |
| 8117301 | -0,19 | -1,14 | 0,53878 | -0,18 | -1,13  | 0,08634 | NM_170610      | ULK4      |  |
| 8086372 | -0,19 | -1,14 | 0,27003 | 0,01  | 1,01   | 0,92500 | NM_017886      | SLC4A8    |  |
| 7955469 | -0,19 | -1,14 | 0,59351 | 0,08  | 1,06   | 0,56800 | NM_001039960   | ACVR1C    |  |
| 8055992 | -0,19 | -1,14 | 0,66809 | 1,12  | 2,17   | 0,01103 | NM_145259      | ---       |  |
| 8052731 | -0,19 | -1,14 | 0,82702 | -2,30 | -4,92  | 0,02593 | ---            | OR4M1     |  |
| 7973008 | -0,19 | -1,14 | 0,81386 | -1,29 | -2,44  | 0,01269 | NM_001005500   | SCN5A     |  |
| 8086222 | -0,19 | -1,14 | 0,60411 | -0,46 | -1,37  | 0,04748 | NM_001099404   | IMPG1     |  |
| 8127666 | -0,19 | -1,14 | 0,29761 | -1,13 | -2,18  | 0,00031 | NM_001563      | SFXN2     |  |
| 7930148 | -0,19 | -1,14 | 0,27139 | 2,76  | 6,78   | 0,00247 | NM_178858      | VRK1      |  |
| 7976621 | -0,19 | -1,14 | 0,73916 | 2,06  | 4,18   | 0,00183 | NM_003384      | KIF5C     |  |
| 8045637 | -0,19 | -1,14 | 0,71186 | 1,40  | 2,65   | 0,00100 | NM_004522      | C9orf57   |  |
| 8161739 | -0,19 | -1,14 | 0,59020 | -0,27 | -1,20  | 0,27159 | NM_001128618   | ---       |  |
| 8100310 | -0,19 | -1,14 | 0,93054 | -6,44 | -87,12 | 0,00277 | ---            | C12orf45  |  |

|         |       |       |         |       |       |         |                 |             |
|---------|-------|-------|---------|-------|-------|---------|-----------------|-------------|
| 7958211 | -0,19 | -1,14 | 0,04424 | 0,07  | 1,05  | 0,86386 | NM_152318       | RASSF5      |
| 7909214 | -0,19 | -1,14 | 0,69435 | 0,33  | 1,26  | 0,35644 | NM_182663       | MIR16-1     |
| 7971659 | -0,19 | -1,14 | 0,41495 | -0,57 | -1,49 | 0,00234 | NR_029486       | HSPA1L      |
| 8125134 | -0,19 | -1,14 | 0,57060 | 1,24  | 2,36  | 0,01957 | NM_005527       | HSPA1L      |
| 8178650 | -0,19 | -1,14 | 0,57060 | 1,24  | 2,36  | 0,01957 | NM_005527       | HSPA1L      |
| 8179848 | -0,19 | -1,14 | 0,57060 | 1,24  | 2,36  | 0,01957 | NM_005527       | ---         |
| 8163011 | -0,19 | -1,14 | 0,49375 | -0,26 | -1,20 | 0,12499 | ---             | MARVELD2    |
| 8105899 | -0,19 | -1,14 | 0,37046 | 3,10  | 8,55  | 0,00134 | NM_001038603    | MARVELD2    |
| 8177498 | -0,19 | -1,14 | 0,37046 | 3,10  | 8,55  | 0,00134 | NM_001038603    | ATP4A       |
| 8036110 | -0,19 | -1,14 | 0,63569 | -1,17 | -2,24 | 0,02500 | NM_000704       | C12orf54    |
| 7955119 | -0,19 | -1,14 | 0,70934 | -0,81 | -1,76 | 0,00189 | NM_152319       | C14orf159   |
| 7976216 | -0,19 | -1,14 | 0,12308 | -0,73 | -1,65 | 0,01127 | NM_001102366    | FBXO39      |
| 8004195 | -0,19 | -1,14 | 0,61854 | -1,29 | -2,44 | 0,04963 | NM_153230       | NFATC4      |
| 7973709 | -0,19 | -1,14 | 0,55619 | -0,12 | -1,09 | 0,50073 | NM_004554       | SFRS5       |
| 7975368 | -0,19 | -1,14 | 0,30467 | 2,31  | 4,97  | 0,00001 | NM_001039465    | RILPL1      |
| 7967463 | -0,19 | -1,14 | 0,44401 | 2,04  | 4,12  | 0,01777 | NM_178314       | TMEM53      |
| 7915578 | -0,19 | -1,14 | 0,46880 | 1,29  | 2,45  | 0,00706 | NM_024587       | ---         |
| 7918951 | -0,19 | -1,14 | 0,41732 | -0,15 | -1,11 | 0,63839 | ---             | ---         |
| 8133898 | -0,19 | -1,14 | 0,49694 | -0,95 | -1,93 | 0,00568 | ---             | MIR17HG     |
| 7969576 | -0,19 | -1,14 | 0,32632 | -0,66 | -1,58 | 0,00583 | NR_027350       | ---         |
| 7965587 | -0,19 | -1,14 | 0,53540 | -0,98 | -1,97 | 0,02114 | ---             | GATC        |
| 7959157 | -0,19 | -1,14 | 0,19366 | 2,00  | 4,00  | 0,01685 | NM_176818       | SNORD37     |
| 8032749 | -0,19 | -1,14 | 0,09219 | -0,56 | -1,47 | 0,08452 | NR_002602       | PPM1K       |
| 8101701 | -0,19 | -1,14 | 0,51998 | -0,38 | -1,30 | 0,15093 | NM_152542       | TMEM93      |
| 8003840 | -0,19 | -1,14 | 0,68583 | 0,82  | 1,77  | 0,16064 | NM_001014764    | FKSG2       |
| 8145824 | -0,19 | -1,14 | 0,26334 | -0,87 | -1,82 | 0,01143 | ENST00000402782 | SNORD114-26 |
| 7976826 | -0,19 | -1,14 | 0,72528 | -0,97 | -1,95 | 0,01549 | NR_003219       | MYT1        |
| 8064277 | -0,19 | -1,14 | 0,61763 | -0,69 | -1,61 | 0,09136 | NM_004535       | CNTNAP3     |
| 8161288 | -0,19 | -1,14 | 0,20558 | 0,17  | 1,12  | 0,39795 | NM_033655       | GPC4        |
| 8175217 | -0,19 | -1,14 | 0,64177 | -0,53 | -1,44 | 0,01270 | NM_001448       | CYB561      |
| 8017378 | -0,20 | -1,14 | 0,58410 | 1,46  | 2,76  | 0,01092 | NM_001915       | KIR2DL4     |
| 8031346 | -0,20 | -1,14 | 0,73617 | -1,41 | -2,66 | 0,00012 | NM_002255       | THOC3       |
| 8110408 | -0,20 | -1,14 | 0,06276 | 1,15  | 2,22  | 0,01568 | NM_032361       | SPAG16      |
| 8048081 | -0,20 | -1,15 | 0,30660 | 0,07  | 1,05  | 0,79638 | NM_024532       | DDX28       |
| 8002211 | -0,20 | -1,15 | 0,51552 | 0,82  | 1,77  | 0,05598 | NM_018380       | EV15L       |
| 8025328 | -0,20 | -1,15 | 0,50219 | 0,72  | 1,65  | 0,10327 | NM_001159944    | MRPL13      |
| 8152597 | -0,20 | -1,15 | 0,38088 | 0,03  | 1,02  | 0,93615 | NM_014078       | LOC80054    |
| 8027564 | -0,20 | -1,15 | 0,27531 | -0,44 | -1,36 | 0,17847 | NR_026887       | PYCR2       |
| 7924669 | -0,20 | -1,15 | 0,24988 | 1,80  | 3,49  | 0,00274 | NM_013328       | MIR517C     |
| 8031037 | -0,20 | -1,15 | 0,64670 | -1,80 | -3,48 | 0,03041 | NR_030214       | PCYT2       |
| 8019280 | -0,20 | -1,15 | 0,62584 | 1,06  | 2,09  | 0,03592 | NM_002861       | TFEB        |
| 8126312 | -0,20 | -1,15 | 0,56222 | 0,22  | 1,17  | 0,35046 | NM_007162       | GJD2        |
| 7987310 | -0,20 | -1,15 | 0,71950 | -1,76 | -3,38 | 0,01699 | NM_020660       | B4GALT3     |
| 7921806 | -0,20 | -1,15 | 0,23749 | 2,95  | 7,71  | 0,00125 | NM_003779       | ---         |
| 7999356 | -0,20 | -1,15 | 0,58631 | -0,46 | -1,38 | 0,27151 | ---             | C1orf131    |
| 7925033 | -0,20 | -1,15 | 0,57150 | -0,19 | -1,14 | 0,63640 | NM_152379       | C1orf161    |
| 7904244 | -0,20 | -1,15 | 0,49403 | -2,37 | -5,17 | 0,00003 | NM_152367       | ---         |
| 8078260 | -0,20 | -1,15 | 0,49441 | -0,46 | -1,37 | 0,00469 | ---             | NOSTRIN     |
| 8046099 | -0,20 | -1,15 | 0,31096 | -0,78 | -1,72 | 0,16114 | NM_001039724    | ---         |
| 8063524 | -0,20 | -1,15 | 0,67025 | -1,78 | -3,44 | 0,00304 | ---             | OPRL1       |
| 8064261 | -0,20 | -1,15 | 0,37527 | -0,37 | -1,29 | 0,36056 | NM_182647       | WDR66       |
| 7959330 | -0,20 | -1,15 | 0,58637 | -0,20 | -1,15 | 0,40119 | NM_144668       | TRMT11      |
| 8121895 | -0,20 | -1,15 | 0,19894 | 0,99  | 1,99  | 0,10516 | NM_001031712    | CHST3       |
| 7928291 | -0,20 | -1,15 | 0,70383 | -0,85 | -1,80 | 0,06758 | NM_004273       | ---         |
| 8020347 | -0,20 | -1,15 | 0,43302 | -1,08 | -2,11 | 0,24955 | ---             | C2          |
| 8118324 | -0,20 | -1,15 | 0,47677 | -0,34 | -1,26 | 0,07118 | NM_000063       | AXIN2       |
| 8017718 | -0,20 | -1,15 | 0,52856 | -0,97 | -1,96 | 0,08763 | NM_004655       | SDPR        |
| 8057797 | -0,20 | -1,15 | 0,71795 | 0,49  | 1,40  | 0,12631 | NM_004657       | PMEPA1      |
| 8067233 | -0,20 | -1,15 | 0,45135 | 2,30  | 4,91  | 0,00436 | NM_020182       | TLR6        |
| 8099841 | -0,20 | -1,15 | 0,59137 | 1,83  | 3,55  | 0,00694 | NM_006068       | DPP9        |
| 8032871 | -0,20 | -1,15 | 0,43955 | 3,78  | 13,73 | 0,00079 | NM_139159       | ---         |
| 7919155 | -0,20 | -1,15 | 0,86006 | -1,26 | -2,40 | 0,00732 | ---             | ---         |
| 7919405 | -0,20 | -1,15 | 0,86006 | -1,26 | -2,40 | 0,00732 | ---             | ANKRD36     |
| 8043687 | -0,20 | -1,15 | 0,79839 | 1,19  | 2,28  | 0,14364 | NM_001164315    | ---         |
| 8053666 | -0,20 | -1,15 | 0,68437 | -1,24 | -2,37 | 0,00032 | ---             | C8orf58     |
| 8145193 | -0,20 | -1,15 | 0,50540 | -0,54 | -1,45 | 0,19725 | NM_001013842    | ZBTB47      |
| 8079099 | -0,20 | -1,15 | 0,35543 | -0,05 | -1,03 | 0,87281 | NM_145166       | RPP25       |
| 7990442 | -0,20 | -1,15 | 0,31449 | 0,05  | 1,04  | 0,91779 | NM_017793       | SOCS2       |
| 7957551 | -0,20 | -1,15 | 0,59245 | 0,95  | 1,94  | 0,05132 | NM_003877       | TOP1MT      |
| 8153390 | -0,20 | -1,15 | 0,39174 | 1,46  | 2,75  | 0,01174 | NM_052963       | MATN1       |
| 7914260 | -0,20 | -1,15 | 0,32911 | -0,78 | -1,72 | 0,12554 | NM_002379       | ATP1B4      |
| 8169687 | -0,20 | -1,15 | 0,62203 | -0,91 | -1,88 | 0,01880 | NM_001142447    | LYVE1       |
| 7946579 | -0,20 | -1,15 | 0,29355 | -0,84 | -1,79 | 0,01523 | NM_006691       | GTF2H4      |

|         |       |       |         |       |       |         |                 |              |
|---------|-------|-------|---------|-------|-------|---------|-----------------|--------------|
| 8118007 | -0,20 | -1,15 | 0,60679 | 1,88  | 3,68  | 0,00205 | NM_001517       | GTF2H4       |
| 8177885 | -0,20 | -1,15 | 0,60679 | 1,88  | 3,68  | 0,00205 | NM_001517       | GTF2H4       |
| 8179205 | -0,20 | -1,15 | 0,60679 | 1,88  | 3,68  | 0,00205 | NM_001517       | SEMA4B       |
| 7985934 | -0,20 | -1,15 | 0,55983 | 3,55  | 11,68 | 0,00384 | NM_020210       | RPA4         |
| 8168723 | -0,20 | -1,15 | 0,34763 | -0,61 | -1,52 | 0,04887 | NM_013347       | FZR1         |
| 8024637 | -0,20 | -1,15 | 0,37677 | -0,04 | -1,03 | 0,90508 | NM_001136198    | TMED8        |
| 7980381 | -0,20 | -1,15 | 0,64831 | 1,94  | 3,85  | 0,00317 | NM_213601       | 14. Sep      |
| 8139727 | -0,20 | -1,15 | 0,59446 | -0,49 | -1,40 | 0,10047 | NM_207366       | ---          |
| 7904953 | -0,20 | -1,15 | 0,07163 | -0,20 | -1,15 | 0,11981 | ---             | TMEM191A     |
| 8071368 | -0,20 | -1,15 | 0,65997 | -2,00 | -4,00 | 0,03374 | NR_026815       | GPR21        |
| 8157727 | -0,20 | -1,15 | 0,76537 | -0,99 | -1,99 | 0,00810 | NM_005294       | DNAH17       |
| 8018902 | -0,20 | -1,15 | 0,49166 | -0,02 | -1,01 | 0,89768 | NM_173628       | ---          |
| 8078448 | -0,20 | -1,15 | 0,38049 | -1,15 | -2,21 | 0,08527 | ---             | KLHL1        |
| 7971937 | -0,20 | -1,15 | 0,29376 | -0,75 | -1,69 | 0,00003 | NM_020866       | TMCO6        |
| 8108579 | -0,20 | -1,15 | 0,68850 | 1,70  | 3,25  | 0,00690 | NM_018502       | ---          |
| 8035868 | -0,20 | -1,15 | 0,69298 | -0,63 | -1,55 | 0,02672 | ---             | ZNF439       |
| 8025964 | -0,20 | -1,15 | 0,67045 | -0,77 | -1,71 | 0,12189 | NM_152262       | LOC100131860 |
| 7991047 | -0,20 | -1,15 | 0,84785 | -0,89 | -1,86 | 0,30609 | AK097109        | NACAP1       |
| 8147693 | -0,20 | -1,15 | 0,40497 | -0,20 | -1,15 | 0,58727 | NR_002182       | STAG3L3      |
| 8139977 | -0,20 | -1,15 | 0,79118 | 1,23  | 2,34  | 0,01257 | NM_001013739    | ---          |
| 7947674 | -0,20 | -1,15 | 0,24182 | -0,24 | -1,18 | 0,40247 | ---             | ACSM3        |
| 7993756 | -0,20 | -1,15 | 0,30758 | 1,92  | 3,80  | 0,00524 | NM_005622       | ---          |
| 7986763 | -0,20 | -1,15 | 0,38196 | -1,02 | -2,02 | 0,07116 | ---             | GSG2         |
| 8003844 | -0,20 | -1,15 | 0,58368 | 1,48  | 2,79  | 0,00642 | NM_031965       | TMEM156      |
| 8099850 | -0,20 | -1,15 | 0,62272 | 4,57  | 23,73 | 0,00027 | NM_024943       | NSUN5P2      |
| 8139947 | -0,20 | -1,15 | 0,60793 | 0,77  | 1,71  | 0,19556 | NR_033323       | CRADD        |
| 7957560 | -0,20 | -1,15 | 0,37578 | 0,56  | 1,47  | 0,01408 | NM_003805       | HPGD         |
| 8103769 | -0,20 | -1,15 | 0,14436 | -0,49 | -1,41 | 0,00314 | NM_000860       | CER1         |
| 8160163 | -0,20 | -1,15 | 0,52585 | -0,89 | -1,85 | 0,06011 | NM_005454       | ---          |
| 8149248 | -0,21 | -1,15 | 0,61596 | -1,11 | -2,16 | 0,02726 | ---             | ZNF155       |
| 8029340 | -0,21 | -1,15 | 0,40918 | 0,01  | 1,01  | 0,94810 | NM_003445       | ---          |
| 8085024 | -0,21 | -1,15 | 0,13861 | -0,62 | -1,54 | 0,13973 | ---             | ---          |
| 7968732 | -0,21 | -1,15 | 0,36313 | -0,93 | -1,90 | 0,06164 | ---             | ZNF833       |
| 8025933 | -0,21 | -1,15 | 0,41769 | -0,49 | -1,41 | 0,07200 | NR_028594       | ---          |
| 7901477 | -0,21 | -1,15 | 0,65364 | -0,80 | -1,74 | 0,01333 | ---             | ATP6AP1L     |
| 8106722 | -0,21 | -1,15 | 0,35605 | -0,68 | -1,61 | 0,01665 | NM_001017971    | SUZ12P       |
| 8006183 | -0,21 | -1,15 | 0,68423 | 2,61  | 6,09  | 0,00119 | NR_024187       | FLJ43390     |
| 7974900 | -0,21 | -1,15 | 0,48390 | -1,52 | -2,87 | 0,00344 | AK125380        | CASR         |
| 8082046 | -0,21 | -1,15 | 0,72392 | -1,32 | -2,50 | 0,00974 | NM_000388       | KLHL21       |
| 7912102 | -0,21 | -1,15 | 0,70060 | 0,31  | 1,24  | 0,22380 | NM_014851       | SLC39A11     |
| 8018082 | -0,21 | -1,15 | 0,61715 | 1,87  | 3,65  | 0,04272 | NM_001159770    | FAM136A      |
| 8052866 | -0,21 | -1,15 | 0,74258 | 2,61  | 6,10  | 0,00303 | NM_032822       | ---          |
| 8156599 | -0,21 | -1,15 | 0,69407 | -0,05 | -1,03 | 0,89263 | ---             | ---          |
| 7899600 | -0,21 | -1,16 | 0,46534 | -1,56 | -2,95 | 0,01326 | ---             | TRIM56       |
| 8135064 | -0,21 | -1,16 | 0,51490 | 0,61  | 1,52  | 0,18917 | NM_030961       | TBX19        |
| 7907146 | -0,21 | -1,16 | 0,74188 | 0,64  | 1,56  | 0,23897 | NM_005149       | ZNF526       |
| 8029188 | -0,21 | -1,16 | 0,70433 | 1,49  | 2,82  | 0,01268 | NM_133444       | IL23R        |
| 7902189 | -0,21 | -1,16 | 0,25032 | -0,67 | -1,59 | 0,04021 | NM_144701       | PLEKHO2      |
| 7984217 | -0,21 | -1,16 | 0,29053 | 0,06  | 1,05  | 0,88806 | NM_025201       | OR10D4P      |
| 7952390 | -0,21 | -1,16 | 0,26258 | -0,59 | -1,50 | 0,04696 | ENST00000334203 | C20orf132    |
| 8066161 | -0,21 | -1,16 | 0,58686 | -0,66 | -1,57 | 0,01166 | NM_152503       | ARHGEF37     |
| 8109161 | -0,21 | -1,16 | 0,25091 | 0,11  | 1,08  | 0,44569 | NM_001001669    | KLF13        |
| 7982326 | -0,21 | -1,16 | 0,57171 | 1,60  | 3,04  | 0,02909 | NM_015995       | ZNF582       |
| 8039586 | -0,21 | -1,16 | 0,53286 | 0,34  | 1,26  | 0,29524 | NM_144690       | ---          |
| 7939118 | -0,21 | -1,16 | 0,37617 | -0,44 | -1,36 | 0,03652 | ---             | OR52A5       |
| 7946023 | -0,21 | -1,16 | 0,56739 | -0,97 | -1,96 | 0,06681 | NM_001005160    | ---          |
| 8152666 | -0,21 | -1,16 | 0,31606 | -0,87 | -1,83 | 0,06113 | ---             | FERMT3       |
| 7940869 | -0,21 | -1,16 | 0,58685 | -0,20 | -1,15 | 0,68125 | NM_178443       | TMEM9        |
| 7923319 | -0,21 | -1,16 | 0,42567 | 1,72  | 3,29  | 0,02720 | NM_016456       | PNLIPRP2     |
| 7930804 | -0,21 | -1,16 | 0,52190 | -0,50 | -1,41 | 0,05572 | NM_005396       | ABCG2        |
| 8101675 | -0,21 | -1,16 | 0,61584 | 1,17  | 2,25  | 0,00349 | NM_004827       | RNF145       |
| 8115562 | -0,21 | -1,16 | 0,39907 | 1,25  | 2,38  | 0,00003 | NM_144726       | RHD          |
| 7898998 | -0,21 | -1,16 | 0,32282 | -0,19 | -1,14 | 0,46589 | NM_016124       | ---          |
| 7929130 | -0,21 | -1,16 | 0,30516 | -0,45 | -1,36 | 0,27761 | ---             | ZNF786       |
| 8143697 | -0,21 | -1,16 | 0,50176 | 0,71  | 1,63  | 0,03631 | NM_152411       | SLC43A2      |
| 8011093 | -0,21 | -1,16 | 0,59415 | 0,32  | 1,25  | 0,24855 | NM_152346       | TTC18        |
| 7934334 | -0,21 | -1,16 | 0,27984 | -0,27 | -1,21 | 0,02044 | NM_145170       | ---          |
| 8021540 | -0,21 | -1,16 | 0,43631 | -1,03 | -2,04 | 0,00870 | ---             | SPIN4        |
| 8173208 | -0,21 | -1,16 | 0,60281 | 0,49  | 1,40  | 0,20139 | NM_001012968    | SYN3         |
| 8075616 | -0,21 | -1,16 | 0,70139 | -0,73 | -1,66 | 0,00533 | NM_003490       | ---          |
| 8130181 | -0,21 | -1,16 | 0,41031 | -1,46 | -2,76 | 0,01711 | ---             | FAM74A3      |
| 8155376 | -0,21 | -1,16 | 0,54782 | -1,39 | -2,62 | 0,00059 | ENST00000377629 | KLRG1        |
| 7953835 | -0,21 | -1,16 | 0,49875 | 0,55  | 1,47  | 0,13469 | NM_005810       | ---          |

|         |       |       |         |       |        |         |              |              |  |
|---------|-------|-------|---------|-------|--------|---------|--------------|--------------|--|
| 7910186 | -0,21 | -1,16 | 0,64579 | -0,23 | -1,17  | 0,31126 | ---          | TGM6         |  |
| 8060447 | -0,21 | -1,16 | 0,66446 | -0,99 | -1,98  | 0,14010 | NM_198994    | CLSTN3       |  |
| 7953626 | -0,21 | -1,16 | 0,33640 | 1,20  | 2,29   | 0,01186 | NM_014718    | ---          |  |
| 8131967 | -0,21 | -1,16 | 0,52880 | 1,34  | 2,52   | 0,03341 | ---          | ---          |  |
| 8172032 | -0,21 | -1,16 | 0,25948 | -1,45 | -2,74  | 0,04343 | ---          | ANKRD36B     |  |
| 8054064 | -0,21 | -1,16 | 0,65582 | -0,19 | -1,14  | 0,65549 | NM_025190    | MORN3        |  |
| 7967193 | -0,21 | -1,16 | 0,52657 | -1,06 | -2,08  | 0,00098 | NM_173855    | KLF4         |  |
| 8163002 | -0,21 | -1,16 | 0,26481 | 1,36  | 2,57   | 0,00488 | NM_004235    | CCDC28B      |  |
| 7899719 | -0,21 | -1,16 | 0,37243 | -1,09 | -2,13  | 0,03368 | NM_024296    | LILRA5       |  |
| 8039236 | -0,21 | -1,16 | 0,27084 | -0,40 | -1,32  | 0,21727 | NM_021250    | ARSA         |  |
| 8077160 | -0,21 | -1,16 | 0,05261 | 0,94  | 1,91   | 0,09660 | NM_000487    | COL6A2       |  |
| 8069301 | -0,21 | -1,16 | 0,66211 | -0,94 | -1,92  | 0,12444 | NM_001849    | DIO1         |  |
| 7901565 | -0,21 | -1,16 | 0,08476 | -0,27 | -1,20  | 0,17062 | NM_000792    | ---          |  |
| 8150157 | -0,21 | -1,16 | 0,34427 | -1,40 | -2,64  | 0,00431 | ---          | INO80C       |  |
| 8022902 | -0,21 | -1,16 | 0,55020 | 0,19  | 1,14   | 0,68897 | NM_001098817 | CPA6         |  |
| 8151191 | -0,21 | -1,16 | 0,34414 | -0,99 | -1,99  | 0,00155 | NM_020361    | ---          |  |
| 7944989 | -0,21 | -1,16 | 0,35811 | -1,78 | -3,44  | 0,00003 | ---          | KRTAP4-7     |  |
| 8015218 | -0,21 | -1,16 | 0,92008 | -4,03 | -16,30 | 0,00119 | NM_033061    | APOA4        |  |
| 8077192 | -0,21 | -1,16 | 0,38542 | -0,67 | -1,59  | 0,00832 | NM_000482    | SNORD51      |  |
| 8047778 | -0,21 | -1,16 | 0,54131 | -0,82 | -1,77  | 0,09884 | NR_002589    | ---          |  |
| 8149273 | -0,21 | -1,16 | 0,73696 | -0,56 | -1,48  | 0,14795 | ---          | FLVCR2       |  |
| 7975799 | -0,21 | -1,16 | 0,60417 | 1,25  | 2,39   | 0,00031 | NM_017791    | IFNA13       |  |
| 8160419 | -0,21 | -1,16 | 0,71490 | -0,42 | -1,34  | 0,09638 | NM_006900    | MARK1        |  |
| 7909841 | -0,21 | -1,16 | 0,46024 | 2,47  | 5,52   | 0,00263 | NM_018650    | CALHM2       |  |
| 7936100 | -0,21 | -1,16 | 0,37106 | -0,86 | -1,82  | 0,22920 | NM_015916    | DAK          |  |
| 7940451 | -0,21 | -1,16 | 0,58820 | 2,22  | 4,66   | 0,01124 | NM_015533    | TP53I11      |  |
| 7947570 | -0,22 | -1,16 | 0,08901 | -0,56 | -1,47  | 0,26162 | NM_001076787 | RPS14        |  |
| 8115158 | -0,22 | -1,16 | 0,69928 | 3,95  | 15,41  | 0,00048 | NM_001025071 | CBLN3        |  |
| 7978331 | -0,22 | -1,16 | 0,47470 | -0,35 | -1,27  | 0,25111 | NM_001039771 | ZNF684       |  |
| 7900461 | -0,22 | -1,16 | 0,24033 | 0,12  | 1,09   | 0,49533 | NM_152373    | ZNF569       |  |
| 8036395 | -0,22 | -1,16 | 0,31333 | 0,91  | 1,88   | 0,07109 | NM_152484    | IL12B        |  |
| 8115570 | -0,22 | -1,16 | 0,51680 | -1,03 | -2,04  | 0,04786 | NM_002187    | SLED1        |  |
| 8103975 | -0,22 | -1,16 | 0,58581 | -0,95 | -1,94  | 0,00630 | NR_003542    | GCNT2        |  |
| 8116835 | -0,22 | -1,16 | 0,65880 | 1,22  | 2,33   | 0,00561 | NM_145649    | ---          |  |
| 8047769 | -0,22 | -1,16 | 0,55667 | -0,73 | -1,66  | 0,01824 | ---          | C10orf54     |  |
| 7934185 | -0,22 | -1,16 | 0,54402 | 0,54  | 1,45   | 0,18451 | NM_022153    | SLC37A4      |  |
| 7952132 | -0,22 | -1,16 | 0,64797 | 2,61  | 6,09   | 0,01416 | NM_001164277 | PLEKHA9      |  |
| 7962489 | -0,22 | -1,16 | 0,51758 | 0,78  | 1,71   | 0,06471 | NM_015899    | ROPN1L       |  |
| 8104492 | -0,22 | -1,16 | 0,60150 | -0,87 | -1,83  | 0,05333 | NM_031916    | CHODL        |  |
| 8067969 | -0,22 | -1,16 | 0,45505 | -1,23 | -2,35  | 0,02686 | NM_024944    | MNS1         |  |
| 7989146 | -0,22 | -1,16 | 0,23955 | 0,73  | 1,66   | 0,34055 | NM_018365    | ALDH5A1      |  |
| 8117207 | -0,22 | -1,16 | 0,27083 | 1,66  | 3,17   | 0,00140 | NM_170740    | ABHD1        |  |
| 8040815 | -0,22 | -1,16 | 0,42453 | 1,57  | 2,96   | 0,00535 | NM_032604    | CIC          |  |
| 8029193 | -0,22 | -1,16 | 0,55116 | 0,51  | 1,43   | 0,30402 | NM_015125    | SEMA4F       |  |
| 8042925 | -0,22 | -1,16 | 0,57257 | 0,06  | 1,04   | 0,84942 | NM_004263    | RXFP2        |  |
| 7968389 | -0,22 | -1,16 | 0,33829 | -0,86 | -1,82  | 0,02591 | NM_130806    | ---          |  |
| 8110461 | -0,22 | -1,16 | 0,66303 | -1,10 | -2,15  | 0,01833 | ---          | TAP2         |  |
| 8125483 | -0,22 | -1,16 | 0,13908 | 1,24  | 2,36   | 0,01437 | NM_000544    | ZNF70        |  |
| 8074931 | -0,22 | -1,16 | 0,42918 | 0,13  | 1,09   | 0,74649 | NM_021916    | COMMD5       |  |
| 8153911 | -0,22 | -1,16 | 0,43555 | 1,04  | 2,05   | 0,04806 | NM_014066    | IGSF22       |  |
| 7947052 | -0,22 | -1,16 | 0,50325 | -0,38 | -1,30  | 0,23931 | NM_173588    | LGI2         |  |
| 8099685 | -0,22 | -1,16 | 0,31066 | 0,98  | 1,97   | 0,05427 | NM_018176    | TUB          |  |
| 7938269 | -0,22 | -1,16 | 0,59953 | 0,30  | 1,23   | 0,17440 | NM_003320    | GMEB2        |  |
| 8067709 | -0,22 | -1,16 | 0,44204 | 0,04  | 1,03   | 0,91884 | NM_012384    | KIRREL3      |  |
| 7952577 | -0,22 | -1,16 | 0,37567 | -1,31 | -2,47  | 0,02087 | NM_032531    | C3orf35      |  |
| 8078605 | -0,22 | -1,16 | 0,48982 | -0,62 | -1,54  | 0,02567 | NM_178339    | C1orf122     |  |
| 7900192 | -0,22 | -1,16 | 0,55506 | -0,31 | -1,24  | 0,56852 | NM_198446    | C3orf21      |  |
| 8092922 | -0,22 | -1,16 | 0,56786 | -0,03 | -1,02  | 0,77363 | NM_152531    | MGAT2        |  |
| 7974207 | -0,22 | -1,16 | 0,53955 | 1,80  | 3,47   | 0,00703 | NM_002408    | LOC100287290 |  |
| 8083652 | -0,22 | -1,16 | 0,01447 | 0,02  | 1,01   | 0,92461 | AY070437     | ---          |  |
| 8113689 | -0,22 | -1,16 | 0,35626 | -0,42 | -1,34  | 0,05121 | ---          | EV12A        |  |
| 8014066 | -0,22 | -1,16 | 0,00374 | -0,96 | -1,95  | 0,01900 | NM_001003927 | ACAD10       |  |
| 7958761 | -0,22 | -1,16 | 0,40454 | 0,77  | 1,70   | 0,22223 | NM_001136538 | TTYH3        |  |
| 8131179 | -0,22 | -1,16 | 0,73802 | 1,62  | 3,08   | 0,04687 | NM_025250    | CCDC8        |  |
| 8037762 | -0,22 | -1,16 | 0,52963 | -0,69 | -1,62  | 0,07295 | NM_032040    | C8orf38      |  |
| 8147424 | -0,22 | -1,16 | 0,37338 | 0,66  | 1,58   | 0,08658 | NM_152416    | C21orf122    |  |
| 8070863 | -0,22 | -1,17 | 0,53002 | -0,79 | -1,73  | 0,03487 | NR_027292    | ---          |  |
| 7913799 | -0,22 | -1,17 | 0,50111 | -1,38 | -2,60  | 0,00158 | ---          | FAM92B       |  |
| 8003193 | -0,22 | -1,17 | 0,40258 | -1,18 | -2,26  | 0,01373 | BC093665     | ZSCAN23      |  |
| 8124583 | -0,22 | -1,17 | 0,57713 | -0,54 | -1,46  | 0,08900 | NM_001012455 | SIAH2        |  |
| 8091485 | -0,22 | -1,17 | 0,67722 | -0,48 | -1,40  | 0,17020 | NM_005067    | GKAP1        |  |
| 8162006 | -0,22 | -1,17 | 0,24221 | 1,15  | 2,22   | 0,16671 | NM_025211    | TCF20        |  |
| 8076436 | -0,22 | -1,17 | 0,70219 | 1,09  | 2,13   | 0,00479 | NM_005650    | ZNF551       |  |

|         |       |       |         |       |        |         |                 |              |
|---------|-------|-------|---------|-------|--------|---------|-----------------|--------------|
| 8031807 | -0,22 | -1,17 | 0,67749 | 0,42  | 1,34   | 0,16577 | NM_138347       | ZNF540       |
| 8028266 | -0,22 | -1,17 | 0,15548 | -0,79 | -1,74  | 0,00567 | NM_001172225    | TCOF1        |
| 8109254 | -0,22 | -1,17 | 0,48768 | 0,38  | 1,30   | 0,25377 | NM_001135243    | RTDR1        |
| 8074869 | -0,22 | -1,17 | 0,33324 | 0,09  | 1,06   | 0,88316 | NM_014433       | ---          |
| 8055668 | -0,22 | -1,17 | 0,37626 | -0,62 | -1,54  | 0,05549 | ---             | RPL22P15     |
| 8054477 | -0,22 | -1,17 | 0,69419 | -0,18 | -1,13  | 0,25327 | CR590757        | ---          |
| 7948308 | -0,22 | -1,17 | 0,72602 | -0,96 | -1,94  | 0,08728 | ---             | ATP8A1       |
| 8100026 | -0,22 | -1,17 | 0,37462 | 0,11  | 1,08   | 0,73253 | NM_006095       | ---          |
| 7972546 | -0,22 | -1,17 | 0,49549 | 1,22  | 2,33   | 0,00654 | ---             | ST8SIA4      |
| 8113358 | -0,22 | -1,17 | 0,24448 | -0,78 | -1,72  | 0,00804 | NM_005668       | OR51B5       |
| 7946071 | -0,22 | -1,17 | 0,41068 | -1,06 | -2,09  | 0,01679 | NM_001005567    | NUDT16P1     |
| 8082663 | -0,22 | -1,17 | 0,58125 | 2,05  | 4,13   | 0,00571 | NR_027766       | IMMP1L       |
| 7947332 | -0,22 | -1,17 | 0,31771 | 1,61  | 3,05   | 0,04943 | NM_144981       | HLA-DOB      |
| 8178833 | -0,22 | -1,17 | 0,38385 | 0,21  | 1,16   | 0,56523 | NM_002120       | UBTD1        |
| 7929649 | -0,22 | -1,17 | 0,60758 | 0,09  | 1,07   | 0,84498 | NM_024954       | ---          |
| 8133189 | -0,22 | -1,17 | 0,04873 | -0,42 | -1,34  | 0,00086 | ---             | INS-IGF2     |
| 7945688 | -0,22 | -1,17 | 0,37185 | -0,35 | -1,27  | 0,19231 | NR_003512       | MIR137       |
| 7917944 | -0,22 | -1,17 | 0,32904 | -1,45 | -2,74  | 0,00222 | NR_029679       | ILF3         |
| 8025697 | -0,22 | -1,17 | 0,43869 | 0,81  | 1,75   | 0,27060 | NM_012218       | OR2Y1        |
| 8116482 | -0,22 | -1,17 | 0,38176 | -1,11 | -2,15  | 0,01024 | NM_001001657    | HHIPL1       |
| 7976669 | -0,22 | -1,17 | 0,09675 | -0,27 | -1,20  | 0,04833 | NM_001127258    | BCAR1        |
| 8002854 | -0,22 | -1,17 | 0,50362 | 0,64  | 1,55   | 0,03543 | NM_001170717    | GPR75        |
| 8052143 | -0,22 | -1,17 | 0,43814 | -0,28 | -1,21  | 0,09207 | NM_006794       | SPOCD1       |
| 7914467 | -0,22 | -1,17 | 0,51238 | -0,36 | -1,28  | 0,16207 | NM_144569       | ZNF831       |
| 8063723 | -0,22 | -1,17 | 0,49476 | -0,92 | -1,90  | 0,02033 | NM_178457       | LOC100131508 |
| 8127776 | -0,22 | -1,17 | 0,12800 | -1,04 | -2,05  | 0,00869 | ENST00000431141 | ---          |
| 7906303 | -0,22 | -1,17 | 0,36844 | -1,03 | -2,04  | 0,00136 | ---             | ---          |
| 8161442 | -0,22 | -1,17 | 0,86519 | -0,36 | -1,29  | 0,67045 | ---             | CENPBD1      |
| 8003553 | -0,22 | -1,17 | 0,40288 | 1,75  | 3,37   | 0,00290 | NM_145039       | MYH7B        |
| 8062064 | -0,22 | -1,17 | 0,07505 | -0,79 | -1,73  | 0,03741 | NM_020884       | ---          |
| 8063442 | -0,22 | -1,17 | 0,53135 | -0,51 | -1,42  | 0,08185 | ---             | ---          |
| 8008596 | -0,22 | -1,17 | 0,49019 | -0,28 | -1,21  | 0,01227 | ---             | TEX15        |
| 8150138 | -0,22 | -1,17 | 0,56779 | 1,19  | 2,29   | 0,21431 | NM_031271       | PLK4         |
| 8097356 | -0,22 | -1,17 | 0,28985 | 3,54  | 11,61  | 0,00012 | NM_014264       | ---          |
| 8139919 | -0,22 | -1,17 | 0,40705 | -0,56 | -1,48  | 0,09191 | ---             | NR1H3        |
| 7939751 | -0,23 | -1,17 | 0,54960 | 0,02  | 1,01   | 0,82847 | NM_005693       | ---          |
| 8115164 | -0,23 | -1,17 | 0,45712 | -0,65 | -1,57  | 0,27735 | ---             | ZNF69        |
| 8025968 | -0,23 | -1,17 | 0,78724 | -1,67 | -3,18  | 0,06532 | NM_021915       | CRTC2        |
| 7920382 | -0,23 | -1,17 | 0,69368 | 3,07  | 8,43   | 0,00030 | NM_181715       | ---          |
| 7926706 | -0,23 | -1,17 | 0,34012 | -0,22 | -1,17  | 0,07629 | ---             | C7orf45      |
| 8136181 | -0,23 | -1,17 | 0,63540 | -0,43 | -1,35  | 0,25975 | NM_145268       | PPARGC1A     |
| 8099633 | -0,23 | -1,17 | 0,53582 | -1,41 | -2,65  | 0,00074 | NM_013261       | ---          |
| 8113421 | -0,23 | -1,17 | 0,33058 | -0,28 | -1,22  | 0,26613 | ---             | SNORD94      |
| 8043276 | -0,23 | -1,17 | 0,57179 | -0,60 | -1,52  | 0,05990 | NR_004378       | ---          |
| 7992458 | -0,23 | -1,17 | 0,59746 | -0,15 | -1,11  | 0,67215 | ---             | OR52N2       |
| 7938059 | -0,23 | -1,17 | 0,34667 | -0,85 | -1,80  | 0,09295 | NM_001005174    | ZNF354C      |
| 8110491 | -0,23 | -1,17 | 0,63255 | 0,09  | 1,07   | 0,76937 | NM_014594       | GNAT1        |
| 8079919 | -0,23 | -1,17 | 0,01902 | -0,85 | -1,80  | 0,13240 | NM_144499       | HGS          |
| 8010638 | -0,23 | -1,17 | 0,71412 | 0,58  | 1,49   | 0,43193 | NM_004712       | HAS3         |
| 7996883 | -0,23 | -1,17 | 0,62604 | 1,05  | 2,07   | 0,02336 | NM_005329       | PSMD3        |
| 8006984 | -0,23 | -1,17 | 0,45678 | 0,74  | 1,67   | 0,09992 | NM_002809       | ---          |
| 7989307 | -0,23 | -1,17 | 0,41944 | -0,58 | -1,50  | 0,01583 | ---             | ASAH2        |
| 7933597 | -0,23 | -1,17 | 0,41013 | -0,41 | -1,32  | 0,28260 | NM_019893       | ---          |
| 8123949 | -0,23 | -1,17 | 0,12576 | -1,00 | -2,00  | 0,00950 | ---             | TAF1A        |
| 7924476 | -0,23 | -1,17 | 0,39847 | 1,80  | 3,48   | 0,00326 | NM_005681       | ---          |
| 7896748 | -0,23 | -1,17 | 0,85072 | -3,80 | -13,95 | 0,00645 | ---             | SATL1        |
| 8173862 | -0,23 | -1,17 | 0,22515 | -0,82 | -1,77  | 0,02636 | NM_001012980    | INPP5J       |
| 8072436 | -0,23 | -1,17 | 0,49390 | 0,19  | 1,14   | 0,23856 | NM_001002837    | YIPF2        |
| 8034108 | -0,23 | -1,17 | 0,58983 | 1,74  | 3,33   | 0,07077 | NM_024029       | EPHA5        |
| 8100578 | -0,23 | -1,17 | 0,20850 | -0,52 | -1,43  | 0,10648 | NM_004439       | CES4         |
| 7995729 | -0,23 | -1,17 | 0,59089 | -0,61 | -1,52  | 0,00589 | NR_003276       | LOC645181    |
| 8106769 | -0,23 | -1,17 | 0,62306 | 0,26  | 1,20   | 0,48757 | XR_038419       | PLGLA        |
| 8044149 | -0,23 | -1,17 | 0,32692 | 0,05  | 1,04   | 0,77562 | NR_003506       | CCNB3        |
| 8167625 | -0,23 | -1,17 | 0,62990 | 0,74  | 1,68   | 0,05542 | NM_033031       | DDC          |
| 8139640 | -0,23 | -1,17 | 0,49909 | -1,67 | -3,17  | 0,00091 | NM_000790       | LSM14B       |
| 8063835 | -0,23 | -1,17 | 0,28698 | 1,05  | 2,07   | 0,05253 | NM_144703       | TRIM66       |
| 7946380 | -0,23 | -1,17 | 0,54411 | -0,19 | -1,14  | 0,35029 | NM_014818       | GAP43        |
| 8081810 | -0,23 | -1,17 | 0,72958 | -0,47 | -1,39  | 0,04673 | NM_001130064    | RASAL1       |
| 7966542 | -0,23 | -1,17 | 0,50986 | -0,73 | -1,66  | 0,19763 | NM_004658       | ZNF396       |
| 8022892 | -0,23 | -1,17 | 0,46400 | -0,41 | -1,33  | 0,18904 | NM_145756       | RAB20        |
| 7972805 | -0,23 | -1,17 | 0,54563 | 0,24  | 1,18   | 0,03902 | NM_017817       | PCID2        |
| 7972888 | -0,23 | -1,17 | 0,55962 | -0,11 | -1,08  | 0,47175 | BC008975        | CHCHD6       |
| 8082305 | -0,23 | -1,17 | 0,44686 | 0,22  | 1,16   | 0,31244 | NM_032343       | PPP4R4       |

|         |       |       |         |       |       |         |                 |              |
|---------|-------|-------|---------|-------|-------|---------|-----------------|--------------|
| 7976451 | -0,23 | -1,17 | 0,36703 | 0,46  | 1,37  | 0,16116 | NM_058237       | THBS4        |
| 8106573 | -0,23 | -1,17 | 0,04416 | -0,79 | -1,73 | 0,01310 | NM_003248       | C7orf33      |
| 8137050 | -0,23 | -1,17 | 0,41636 | -0,68 | -1,61 | 0,00832 | BC021251 LRRC8C |              |
| 7902874 | -0,23 | -1,17 | 0,37392 | 0,35  | 1,28  | 0,10325 | NM_032270       | OR5M3        |
| 7948133 | -0,23 | -1,17 | 0,74879 | -0,77 | -1,71 | 0,14922 | NM_001004742    | G0S2         |
| 7909441 | -0,23 | -1,17 | 0,68739 | 0,17  | 1,13  | 0,74813 | NM_015714       | ABP1         |
| 8137271 | -0,23 | -1,17 | 0,22527 | -0,51 | -1,42 | 0,10046 | NM_001091       | MECOM        |
| 8091972 | -0,23 | -1,17 | 0,35970 | 0,38  | 1,30  | 0,04188 | NM_001105077    | FAM200A      |
| 8141311 | -0,23 | -1,17 | 0,27678 | 0,17  | 1,12  | 0,55104 | NM_145111       | KIF2C        |
| 7901010 | -0,23 | -1,17 | 0,47093 | 1,48  | 2,80  | 0,00232 | NM_006845       | CCL23        |
| 8014361 | -0,23 | -1,17 | 0,60905 | -1,20 | -2,30 | 0,00031 | NM_005064       | LOC222699    |
| 8124551 | -0,23 | -1,17 | 0,78805 | 1,43  | 2,70  | 0,01599 | NR_002936       | ---          |
| 8106720 | -0,23 | -1,17 | 0,49268 | -0,38 | -1,30 | 0,29147 | ---             | POLE3        |
| 8163525 | -0,23 | -1,17 | 0,27409 | 1,50  | 2,83  | 0,02306 | NM_017443       | RBM47        |
| 8099967 | -0,23 | -1,17 | 0,55609 | 1,53  | 2,89  | 0,00231 | NM_001098634    | G6PC         |
| 8007429 | -0,23 | -1,17 | 0,47830 | -0,88 | -1,84 | 0,00405 | NM_000151       | RNF128       |
| 8169174 | -0,23 | -1,17 | 0,53694 | 0,56  | 1,48  | 0,14404 | NM_024539       | GAB3         |
| 8176163 | -0,23 | -1,17 | 0,18358 | -0,39 | -1,31 | 0,23215 | NM_001081573    | ZNF101       |
| 8027233 | -0,23 | -1,17 | 0,35217 | 0,86  | 1,82  | 0,16055 | NM_033204       | MYST1        |
| 7995055 | -0,23 | -1,17 | 0,66482 | 0,90  | 1,87  | 0,02392 | NM_182958       | OR9H1P       |
| 7911215 | -0,23 | -1,17 | 0,22709 | -1,31 | -2,48 | 0,01362 | AY358215 IL18BP |              |
| 7942300 | -0,23 | -1,17 | 0,04127 | -0,50 | -1,41 | 0,06644 | NM_173042       | GATS         |
| 8141477 | -0,23 | -1,17 | 0,63635 | 0,92  | 1,89  | 0,00265 | NR_028038       | RAPGEF1      |
| 8164665 | -0,23 | -1,18 | 0,17393 | 2,68  | 6,43  | 0,00844 | NM_005312       | CNOT3        |
| 8031122 | -0,23 | -1,18 | 0,49518 | 1,20  | 2,29  | 0,00778 | NM_014516       | LOC646851    |
| 8076113 | -0,23 | -1,18 | 0,38002 | 0,37  | 1,30  | 0,39743 | NM_001013647    | RBP5         |
| 7960764 | -0,23 | -1,18 | 0,78674 | -0,56 | -1,47 | 0,12473 | NM_031491       | RMND5B       |
| 8110437 | -0,23 | -1,18 | 0,50522 | 1,36  | 2,56  | 0,03191 | NM_022762       | TMEM11       |
| 8013500 | -0,23 | -1,18 | 0,17996 | 0,27  | 1,20  | 0,62471 | NM_003876       | MIR29B2      |
| 7923976 | -0,23 | -1,18 | 0,03684 | -0,69 | -1,62 | 0,05575 | NR_029518       | ---          |
| 8102979 | -0,23 | -1,18 | 0,66770 | -1,59 | -3,00 | 0,00006 | ---             | LOC100130691 |
| 8056983 | -0,23 | -1,18 | 0,17178 | 0,84  | 1,80  | 0,04646 | NR_026966       | ---          |
| 8169437 | -0,23 | -1,18 | 0,39305 | -0,45 | -1,37 | 0,05563 | ---             | MTMR7        |
| 8149485 | -0,23 | -1,18 | 0,12194 | -0,04 | -1,03 | 0,69484 | NM_004686       | FANCC        |
| 8162514 | -0,23 | -1,18 | 0,58380 | 3,63  | 12,37 | 0,00007 | NM_000136       | 11. Mrz      |
| 8111124 | -0,23 | -1,18 | 0,57168 | -0,35 | -1,28 | 0,10985 | NM_001102562    | SLC26A7      |
| 8147273 | -0,23 | -1,18 | 0,16983 | -0,64 | -1,56 | 0,17638 | NM_052832       | PGLYRP2      |
| 8035069 | -0,23 | -1,18 | 0,59690 | -1,03 | -2,04 | 0,00539 | NM_052890       | YRDC         |
| 7915084 | -0,24 | -1,18 | 0,74399 | 2,60  | 6,06  | 0,00430 | NM_024640       | SNORD24      |
| 8159004 | -0,24 | -1,18 | 0,52522 | -0,25 | -1,19 | 0,66549 | NR_002447       | ---          |
| 7971860 | -0,24 | -1,18 | 0,51075 | -0,64 | -1,55 | 0,00264 | ---             | ---          |
| 7980350 | -0,24 | -1,18 | 0,51285 | -0,99 | -1,99 | 0,00099 | ---             | CNGA1        |
| 8094936 | -0,24 | -1,18 | 0,69276 | -0,57 | -1,49 | 0,10053 | NM_001142564    | ---          |
| 8097011 | -0,24 | -1,18 | 0,38446 | 0,39  | 1,31  | 0,35021 | ---             | GRHL3        |
| 7898916 | -0,24 | -1,18 | 0,02937 | -0,33 | -1,25 | 0,26965 | NM_198173       | MDGA1        |
| 8126102 | -0,24 | -1,18 | 0,31212 | -1,32 | -2,50 | 0,01467 | NM_153487       | TGIF1        |
| 8019939 | -0,24 | -1,18 | 0,30226 | 0,03  | 1,02  | 0,88796 | NM_170695       | SNORD116-26  |
| 7982000 | -0,24 | -1,18 | 0,46052 | -0,52 | -1,43 | 0,18757 | NR_003340       | ZNF334       |
| 8066745 | -0,24 | -1,18 | 0,58013 | -1,19 | -2,28 | 0,01525 | NM_199441       | TTC7A        |
| 8041826 | -0,24 | -1,18 | 0,66246 | 0,67  | 1,59  | 0,03144 | NM_020458       | ---          |
| 8122552 | -0,24 | -1,18 | 0,07328 | -1,39 | -2,62 | 0,03322 | ---             | ACTR6        |
| 7957793 | -0,24 | -1,18 | 0,53879 | 0,64  | 1,56  | 0,16425 | NM_022496       | NKX2-2       |
| 8065334 | -0,24 | -1,18 | 0,52038 | -0,85 | -1,80 | 0,00362 | NM_002509       | PRSS8        |
| 8001007 | -0,24 | -1,18 | 0,72261 | 2,31  | 4,96  | 0,01646 | NM_002773       | PTPN20A      |
| 7933437 | -0,24 | -1,18 | 0,26327 | 1,66  | 3,16  | 0,00503 | NM_001042389    | DTNBP1       |
| 8124022 | -0,24 | -1,18 | 0,17348 | -0,56 | -1,47 | 0,07887 | NM_183040       | ---          |
| 8055016 | -0,24 | -1,18 | 0,31702 | -0,51 | -1,42 | 0,03734 | ---             | GBX1         |
| 8143885 | -0,24 | -1,18 | 0,43269 | -0,42 | -1,34 | 0,09725 | NM_001098834    | CNTNAP4      |
| 7997289 | -0,24 | -1,18 | 0,28604 | -0,83 | -1,78 | 0,06821 | NM_033401       | NLRP10       |
| 7946334 | -0,24 | -1,18 | 0,74421 | -1,21 | -2,32 | 0,01268 | NM_176821       | ZNHIT1       |
| 8135089 | -0,24 | -1,18 | 0,51353 | -0,55 | -1,47 | 0,08857 | NM_006349       | REPS2        |
| 8166243 | -0,24 | -1,18 | 0,32077 | 2,03  | 4,10  | 0,00062 | NM_004726       | C14orf174    |
| 7975971 | -0,24 | -1,18 | 0,36243 | -0,50 | -1,42 | 0,06418 | NM_001010860    | ING5         |
| 8049906 | -0,24 | -1,18 | 0,25817 | 0,47  | 1,39  | 0,03457 | NM_032329       | DDX4         |
| 8105384 | -0,24 | -1,18 | 0,44276 | -0,30 | -1,23 | 0,02375 | NM_024415       | ---          |
| 7960861 | -0,24 | -1,18 | 0,43426 | -1,68 | -3,21 | 0,08095 | ---             | HIC1         |
| 8003719 | -0,24 | -1,18 | 0,51021 | -0,49 | -1,40 | 0,42759 | NM_001098202    | ROCK1        |
| 8020382 | -0,24 | -1,18 | 0,41391 | 0,13  | 1,10  | 0,89494 | NM_005406       | ---          |
| 7965478 | -0,24 | -1,18 | 0,71604 | -1,41 | -2,66 | 0,03884 | ---             | C19orf45     |
| 8025169 | -0,24 | -1,18 | 0,57301 | -0,29 | -1,22 | 0,45202 | NM_198534       | ZDHHC18      |
| 7899253 | -0,24 | -1,18 | 0,66917 | 2,46  | 5,49  | 0,00551 | NM_032283       | ATG4D        |
| 8025659 | -0,24 | -1,18 | 0,55493 | 1,26  | 2,39  | 0,02733 | NM_032885       | SERF1A       |
| 8105949 | -0,24 | -1,18 | 0,50753 | 0,29  | 1,22  | 0,26825 | NM_021967       | SERF1A       |

|         |       |       |         |       |       |         |                 |           |
|---------|-------|-------|---------|-------|-------|---------|-----------------|-----------|
| 8105997 | -0,24 | -1,18 | 0,50753 | 0,29  | 1,22  | 0,26825 | NM_021967       | SERF1A    |
| 8177658 | -0,24 | -1,18 | 0,50753 | 0,29  | 1,22  | 0,26825 | NM_021967       | LTF       |
| 8086607 | -0,24 | -1,18 | 0,64474 | -1,40 | -2,65 | 0,01381 | NM_002343       | RNF123    |
| 8079796 | -0,24 | -1,18 | 0,31589 | 0,45  | 1,37  | 0,15411 | NM_022064       | SCARNA7   |
| 8091778 | -0,24 | -1,18 | 0,64758 | 1,54  | 2,91  | 0,00664 | NR_003001       | NAGLU     |
| 8007250 | -0,24 | -1,18 | 0,45976 | -0,05 | -1,04 | 0,91902 | NM_000263       | BLID      |
| 7952309 | -0,24 | -1,18 | 0,59683 | -0,88 | -1,84 | 0,00731 | NM_001001786    | MRPL52    |
| 7973327 | -0,24 | -1,18 | 0,20630 | 0,22  | 1,17  | 0,24814 | NM_181304       | ATP13A1   |
| 8035737 | -0,24 | -1,18 | 0,35143 | 1,50  | 2,83  | 0,02295 | NM_020410       | ---       |
| 7973865 | -0,24 | -1,18 | 0,28745 | -1,82 | -3,53 | 0,03327 | ---             | TDGF1     |
| 8079422 | -0,24 | -1,18 | 0,39929 | -0,59 | -1,51 | 0,04286 | NM_003212       | FKBPL     |
| 8125316 | -0,24 | -1,18 | 0,61741 | -0,99 | -1,99 | 0,00919 | NM_022110       | FKBPL     |
| 8178749 | -0,24 | -1,18 | 0,61741 | -0,99 | -1,99 | 0,00919 | NM_022110       | ---       |
| 8138487 | -0,24 | -1,18 | 0,72302 | 0,96  | 1,95  | 0,00903 | ---             | CCDC144A  |
| 8013272 | -0,24 | -1,18 | 0,16920 | 0,57  | 1,49  | 0,25357 | NM_014695       | ULBP1     |
| 8122724 | -0,24 | -1,18 | 0,60493 | 1,98  | 3,95  | 0,00059 | NM_025218       | CASKIN2   |
| 8018379 | -0,24 | -1,18 | 0,51332 | 0,27  | 1,20  | 0,41981 | NM_020753       | C9orf152  |
| 8163181 | -0,24 | -1,18 | 0,36176 | -1,05 | -2,07 | 0,02490 | NM_001012993    | SPOCK2    |
| 7934215 | -0,24 | -1,18 | 0,57993 | -0,40 | -1,32 | 0,06470 | NM_014767       | ---       |
| 8097036 | -0,24 | -1,18 | 0,59360 | -0,51 | -1,42 | 0,00001 | ---             | ERBB2     |
| 8006906 | -0,24 | -1,18 | 0,48329 | 2,03  | 4,07  | 0,00624 | NM_001005862    | NUDT15    |
| 7968999 | -0,24 | -1,18 | 0,10333 | -0,37 | -1,30 | 0,21970 | NM_018283       | DUSP8     |
| 7945641 | -0,24 | -1,18 | 0,69430 | 0,07  | 1,05  | 0,90628 | NM_004420       | ---       |
| 8100456 | -0,24 | -1,18 | 0,70281 | 0,06  | 1,04  | 0,88414 | ---             | SPARCL1   |
| 8101659 | -0,24 | -1,18 | 0,42495 | -0,93 | -1,90 | 0,07962 | NM_001128310    | NCBP2L    |
| 8169247 | -0,24 | -1,18 | 0,17278 | -0,45 | -1,36 | 0,12972 | ENST00000372379 | C15orf58  |
| 7985959 | -0,24 | -1,18 | 0,64668 | 0,79  | 1,73  | 0,00939 | NM_001013657    | PTCH2     |
| 7915612 | -0,24 | -1,18 | 0,37314 | -0,29 | -1,22 | 0,10039 | NM_001166292    | ---       |
| 8166817 | -0,24 | -1,18 | 0,27711 | -0,56 | -1,47 | 0,09231 | ---             | tcag7.907 |
| 8097118 | -0,24 | -1,18 | 0,75879 | -1,31 | -2,49 | 0,20291 | ENST00000415418 | ---       |
| 7972018 | -0,24 | -1,18 | 0,61406 | -1,26 | -2,39 | 0,00350 | ---             | SLC2A11   |
| 8071783 | -0,24 | -1,18 | 0,63174 | 0,35  | 1,28  | 0,20972 | NM_030807       | TSEN2     |
| 8077914 | -0,24 | -1,18 | 0,07114 | 0,63  | 1,54  | 0,00971 | NM_025265       | GPM6A     |
| 8103789 | -0,24 | -1,18 | 0,45400 | -0,11 | -1,08 | 0,43154 | NM_005277       | ATP10B    |
| 8115623 | -0,24 | -1,18 | 0,38703 | -0,54 | -1,45 | 0,04732 | NM_025153       | ---       |
| 8055664 | -0,24 | -1,18 | 0,28911 | -0,66 | -1,58 | 0,12371 | ---             | CCDC149   |
| 8099670 | -0,24 | -1,18 | 0,23001 | 0,50  | 1,41  | 0,05914 | NM_001130726    | ---       |
| 8022557 | -0,24 | -1,18 | 0,30455 | -1,29 | -2,44 | 0,03671 | ---             | DAAM2     |
| 8119357 | -0,24 | -1,18 | 0,53146 | -0,51 | -1,42 | 0,02498 | NM_015345       | IMMP2L    |
| 8142332 | -0,24 | -1,18 | 0,29392 | -0,35 | -1,28 | 0,02017 | NM_032549       | ---       |
| 8051666 | -0,24 | -1,18 | 0,51027 | -0,88 | -1,84 | 0,01178 | ---             | EXOSC7    |
| 8079294 | -0,24 | -1,18 | 0,46025 | 1,38  | 2,61  | 0,00534 | NM_015004       | CARD6     |
| 8105077 | -0,24 | -1,18 | 0,27116 | -0,03 | -1,02 | 0,89206 | NM_032587       | SNORA74A  |
| 8108420 | -0,24 | -1,18 | 0,41705 | -0,14 | -1,10 | 0,54012 | NR_002915       | OR51V1    |
| 7946031 | -0,24 | -1,18 | 0,79980 | -2,55 | -5,85 | 0,00001 | NM_001004760    | ---       |
| 8036025 | -0,24 | -1,18 | 0,21035 | -1,12 | -2,17 | 0,00869 | ---             | PSG11     |
| 8037259 | -0,24 | -1,18 | 0,57222 | -0,78 | -1,71 | 0,06169 | NM_203287       | C1orf227  |
| 7924180 | -0,24 | -1,18 | 0,52307 | -0,30 | -1,23 | 0,02352 | NM_001024601    | PRR21     |
| 8060082 | -0,24 | -1,18 | 0,67223 | -0,66 | -1,58 | 0,06667 | NM_001080835    | LRP4      |
| 7947744 | -0,24 | -1,18 | 0,25992 | 0,41  | 1,33  | 0,45930 | NM_002334       | TRPM8     |
| 8049394 | -0,25 | -1,19 | 0,35064 | -0,45 | -1,36 | 0,22074 | NM_024080       | SLCO2B1   |
| 7942569 | -0,25 | -1,19 | 0,55903 | -0,41 | -1,32 | 0,03580 | NM_001145211    | ---       |
| 8099438 | -0,25 | -1,19 | 0,65925 | -1,78 | -3,44 | 0,00016 | ---             | NTHL1     |
| 7998692 | -0,25 | -1,19 | 0,18402 | 0,24  | 1,18  | 0,40410 | NM_002528       | ANO8      |
| 8035278 | -0,25 | -1,19 | 0,66406 | 0,69  | 1,61  | 0,23653 | NM_020959       | HIST1H3J  |
| 8124537 | -0,25 | -1,19 | 0,59015 | 0,09  | 1,07  | 0,35916 | NM_003535       | LSM4      |
| 8035449 | -0,25 | -1,19 | 0,70015 | -0,32 | -1,25 | 0,62488 | NM_012321       | TRIM75    |
| 8098175 | -0,25 | -1,19 | 0,31438 | 0,02  | 1,02  | 0,85458 | ENST00000322402 | ---       |
| 8023059 | -0,25 | -1,19 | 0,51580 | -0,10 | -1,07 | 0,79401 | ---             | PCDHB4    |
| 8108693 | -0,25 | -1,19 | 0,33136 | -0,88 | -1,84 | 0,08525 | NM_018938       | ---       |
| 7922400 | -0,25 | -1,19 | 0,30233 | -0,03 | -1,02 | 0,94865 | ---             | SDR39U1   |
| 7978335 | -0,25 | -1,19 | 0,51898 | 0,81  | 1,76  | 0,00843 | NM_020195       | ---       |
| 8058201 | -0,25 | -1,19 | 0,77947 | -1,42 | -2,68 | 0,01156 | ---             | SNORA38   |
| 8118207 | -0,25 | -1,19 | 0,40012 | -0,40 | -1,32 | 0,33842 | NR_002971       | RPL13P5   |
| 7953516 | -0,25 | -1,19 | 0,42801 | 0,96  | 1,95  | 0,01273 | NR_002803       | MOB2      |
| 7945631 | -0,25 | -1,19 | 0,24728 | -0,65 | -1,57 | 0,19315 | NM_001172223    | LOC643659 |
| 8065278 | -0,25 | -1,19 | 0,37272 | -0,84 | -1,78 | 0,12768 | AK056971        | BCL2L14   |
| 7953993 | -0,25 | -1,19 | 0,33072 | -0,82 | -1,77 | 0,15000 | NM_030766       | EPS8L2    |
| 7937443 | -0,25 | -1,19 | 0,16083 | 0,85  | 1,81  | 0,12861 | NM_022772       | C11orf85  |
| 7949327 | -0,25 | -1,19 | 0,38140 | -0,91 | -1,88 | 0,00158 | BC106951        | OR51L1    |
| 7937984 | -0,25 | -1,19 | 0,58148 | -1,39 | -2,62 | 0,00176 | NM_001004755    | ---       |
| 8054870 | -0,25 | -1,19 | 0,83041 | -0,98 | -1,97 | 0,04229 | ---             | PPRC1     |
| 7929990 | -0,25 | -1,19 | 0,31782 | 2,58  | 5,97  | 0,01772 | NM_015062       | IL24      |

|         |       |       |         |       |       |         |                   |            |
|---------|-------|-------|---------|-------|-------|---------|-------------------|------------|
| 7909271 | -0,25 | -1,19 | 0,26559 | -0,14 | -1,10 | 0,55469 | NM_006850         | NEK10      |
| 8085867 | -0,25 | -1,19 | 0,03642 | -0,74 | -1,67 | 0,00001 | NM_199347         | ---        |
| 8162996 | -0,25 | -1,19 | 0,06888 | -1,19 | -2,27 | 0,02695 | ---               | ---        |
| 8062284 | -0,25 | -1,19 | 0,72251 | -1,26 | -2,39 | 0,03373 | ---               | ---        |
| 7971239 | -0,25 | -1,19 | 0,10426 | -0,24 | -1,18 | 0,50709 | ---               | DDR1       |
| 8117900 | -0,25 | -1,19 | 0,62220 | 1,30  | 2,47  | 0,05441 | NM_013993         | POLRMT     |
| 8032057 | -0,25 | -1,19 | 0,48107 | 1,07  | 2,10  | 0,00171 | NM_005035         | C8A        |
| 7901732 | -0,25 | -1,19 | 0,32703 | -0,71 | -1,64 | 0,06382 | NM_000562         | CYP2J2     |
| 7916616 | -0,25 | -1,19 | 0,43630 | 1,03  | 2,05  | 0,08257 | NM_000775         | GRIK4      |
| 7944603 | -0,25 | -1,19 | 0,51263 | -0,37 | -1,29 | 0,00327 | NM_014619         | XCL1       |
| 7907156 | -0,25 | -1,19 | 0,57362 | -0,61 | -1,52 | 0,21377 | NM_002995         | RBM15B     |
| 8080093 | -0,25 | -1,19 | 0,57422 | 0,48  | 1,40  | 0,23461 | NM_013286         | GJD4       |
| 7933073 | -0,25 | -1,19 | 0,57596 | -1,09 | -2,14 | 0,00175 | NM_153368         | POLG2      |
| 8017621 | -0,25 | -1,19 | 0,20717 | 0,74  | 1,67  | 0,07903 | NM_007215         | TRPC6      |
| 7951178 | -0,25 | -1,19 | 0,43126 | -1,58 | -2,99 | 0,00118 | NM_004621         | SPRYD5     |
| 7943019 | -0,25 | -1,19 | 0,74406 | -1,32 | -2,49 | 0,00220 | NM_032681         | SPRYD5     |
| 7950977 | -0,25 | -1,19 | 0,74406 | -1,32 | -2,49 | 0,00220 | NM_032681         | GPR64      |
| 8171624 | -0,25 | -1,19 | 0,48526 | 1,22  | 2,32  | 0,00022 | NM_001079858      | TMSB4Y     |
| 8176644 | -0,25 | -1,19 | 0,27684 | -0,84 | -1,79 | 0,07354 | NM_004202         | PLAC8L1    |
| 8114856 | -0,25 | -1,19 | 0,37166 | -0,13 | -1,10 | 0,79913 | NM_001029869      | AGXT2      |
| 8111474 | -0,25 | -1,19 | 0,22159 | -1,33 | -2,51 | 0,02133 | NM_031900         | CEP250     |
| 8062137 | -0,25 | -1,19 | 0,18970 | 0,22  | 1,17  | 0,36173 | NM_007186         | IGK@       |
| 8053690 | -0,25 | -1,19 | 0,76099 | -1,64 | -3,12 | 0,09837 | BC032451 WWOX     |            |
| 7997352 | -0,25 | -1,19 | 0,46235 | -0,55 | -1,47 | 0,03962 | NM_016373         | PARK2      |
| 8130645 | -0,25 | -1,19 | 0,22280 | -0,67 | -1,60 | 0,01733 | NM_004562         | LOC388796  |
| 8066247 | -0,25 | -1,19 | 0,18362 | 3,17  | 9,01  | 0,00469 | NR_027241         | POLL       |
| 7935865 | -0,25 | -1,19 | 0,49767 | 1,44  | 2,71  | 0,02441 | NM_001174084      | SNORD4A    |
| 8005953 | -0,25 | -1,19 | 0,07641 | 0,47  | 1,39  | 0,19973 | NR_000010         | KIAA0195   |
| 8009796 | -0,25 | -1,19 | 0,33945 | 2,62  | 6,15  | 0,00198 | NM_014738         | OR5L2      |
| 7939948 | -0,25 | -1,19 | 0,37105 | -0,60 | -1,52 | 0,05529 | NM_001004739      | MCM10      |
| 7926259 | -0,25 | -1,19 | 0,44117 | 2,52  | 5,75  | 0,01584 | NM_182751         | FBLN2      |
| 8077970 | -0,25 | -1,19 | 0,37597 | -1,31 | -2,47 | 0,03414 | NM_001004019      | NEXN       |
| 7917151 | -0,25 | -1,19 | 0,51194 | -0,42 | -1,34 | 0,39763 | ENST00000334785   | C2orf84    |
| 8040541 | -0,25 | -1,19 | 0,62225 | -0,72 | -1,64 | 0,00625 | BC050462 PDRG1    |            |
| 8065596 | -0,25 | -1,19 | 0,58307 | 1,53  | 2,88  | 0,00064 | NM_030815         | POTEA      |
| 8146307 | -0,25 | -1,19 | 0,51976 | -0,50 | -1,41 | 0,12366 | NM_001005365      | KIAA1407   |
| 8089659 | -0,25 | -1,19 | 0,35057 | 0,26  | 1,20  | 0,52414 | AK302488 CCDC85A  |            |
| 8052376 | -0,25 | -1,19 | 0,63776 | -1,17 | -2,25 | 0,00064 | NM_001080433      | SLC22A18AS |
| 7945774 | -0,25 | -1,19 | 0,26724 | -0,38 | -1,30 | 0,08419 | NM_007105         | CATSPERG   |
| 8028341 | -0,25 | -1,19 | 0,62199 | -0,18 | -1,14 | 0,16849 | NM_021185         | ---        |
| 8154357 | -0,25 | -1,19 | 0,68904 | 0,76  | 1,69  | 0,27203 | ---               | ANKRD1     |
| 7934979 | -0,25 | -1,19 | 0,33449 | 2,17  | 4,51  | 0,00526 | NM_014391         | DOCK3      |
| 8080028 | -0,25 | -1,19 | 0,34859 | 1,05  | 2,07  | 0,00820 | NM_004947         | SSX4       |
| 8172415 | -0,25 | -1,19 | 0,71321 | -1,38 | -2,61 | 0,00106 | NM_005636         | LPXN       |
| 7948332 | -0,25 | -1,19 | 0,58641 | 0,17  | 1,13  | 0,69770 | NM_004811         | APEX2      |
| 8167854 | -0,25 | -1,19 | 0,29831 | 0,64  | 1,56  | 0,17184 | NM_014481         | KLF5       |
| 7969414 | -0,26 | -1,19 | 0,26034 | 0,38  | 1,30  | 0,30402 | NM_001730         | ---        |
| 8162868 | -0,26 | -1,19 | 0,26591 | -0,97 | -1,96 | 0,01211 | ---               | C2orf40    |
| 8044143 | -0,26 | -1,19 | 0,52545 | -1,07 | -2,10 | 0,00150 | NM_032411         | SBF1       |
| 8077042 | -0,26 | -1,19 | 0,55148 | 1,11  | 2,16  | 0,08645 | NM_002972         | EVL        |
| 7976726 | -0,26 | -1,19 | 0,55079 | 0,90  | 1,86  | 0,14855 | NM_016337         | ATF3       |
| 7909610 | -0,26 | -1,19 | 0,34894 | 0,30  | 1,23  | 0,07342 | NM_001040619      | CYorf15A   |
| 8176698 | -0,26 | -1,19 | 0,61921 | 0,67  | 1,60  | 0,08437 | NM_001005852      | ARHGEF10L  |
| 7898483 | -0,26 | -1,19 | 0,40032 | -0,49 | -1,41 | 0,13703 | NM_018125         | TCEAL5     |
| 8174235 | -0,26 | -1,19 | 0,25716 | -0,88 | -1,84 | 0,15403 | NM_001012979      | ---        |
| 7904448 | -0,26 | -1,19 | 0,65732 | -0,43 | -1,34 | 0,40765 | ---               | MGC16025   |
| 8060061 | -0,26 | -1,19 | 0,27762 | -1,34 | -2,53 | 0,01763 | NR_026664         | ---        |
| 8059687 | -0,26 | -1,19 | 0,76684 | -0,53 | -1,45 | 0,51254 | ---               | FLJ39639   |
| 7992867 | -0,26 | -1,19 | 0,47337 | -0,02 | -1,01 | 0,95586 | AK096958 C21orf33 |            |
| 8069026 | -0,26 | -1,20 | 0,26685 | 1,18  | 2,27  | 0,00215 | NM_004649         | NLRP14     |
| 7938195 | -0,26 | -1,20 | 0,41588 | -0,72 | -1,64 | 0,00661 | NM_176822         | RASSF1     |
| 8087640 | -0,26 | -1,20 | 0,65243 | 0,05  | 1,04  | 0,80641 | NM_007182         | CSNK1G1    |
| 7989657 | -0,26 | -1,20 | 0,54669 | -0,08 | -1,06 | 0,74137 | AK301858 KHNYN    |            |
| 7973732 | -0,26 | -1,20 | 0,23688 | 0,17  | 1,12  | 0,35913 | NM_015299         | ---        |
| 7921358 | -0,26 | -1,20 | 0,69864 | -0,66 | -1,59 | 0,26511 | ---               | ---        |
| 8134676 | -0,26 | -1,20 | 0,42730 | -0,71 | -1,64 | 0,01036 | ---               | RBM44      |
| 8049552 | -0,26 | -1,20 | 0,20846 | -0,63 | -1,55 | 0,02001 | NM_001080504      | TOMM7      |
| 8138547 | -0,26 | -1,20 | 0,35808 | -0,01 | -1,01 | 0,97788 | NM_019059         | HPS1       |
| 7935588 | -0,26 | -1,20 | 0,46496 | -0,01 | -1,00 | 0,99099 | NM_000195         | PIGF       |
| 8051993 | -0,26 | -1,20 | 0,76945 | 0,75  | 1,68  | 0,31449 | NM_173074         | SULT1C2    |
| 8044212 | -0,26 | -1,20 | 0,55972 | -0,77 | -1,71 | 0,07619 | NM_001056         | C17orf73   |
| 8016735 | -0,26 | -1,20 | 0,25697 | -0,97 | -1,96 | 0,04287 | NR_024626         | CIDEA      |
| 8020211 | -0,26 | -1,20 | 0,46118 | -0,36 | -1,28 | 0,16308 | NM_001279         | HIST1H4L   |



|         |       |       |         |       |        |         |                |          |
|---------|-------|-------|---------|-------|--------|---------|----------------|----------|
| 8124534 | -0,26 | -1,20 | 0,41474 | 0,29  | 1,22   | 0,48091 | NM_003546      | ARL13A   |
| 8168781 | -0,26 | -1,20 | 0,09094 | -0,77 | -1,71  | 0,07448 | NM_001162490   | SV2B     |
| 7986195 | -0,26 | -1,20 | 0,42732 | -1,02 | -2,03  | 0,00097 | NM_014848      | B9D1     |
| 8013331 | -0,26 | -1,20 | 0,05160 | -0,30 | -1,23  | 0,07711 | NM_015681      | HOXD10   |
| 8046536 | -0,26 | -1,20 | 0,58329 | -0,57 | -1,49  | 0,43877 | NM_002148      | IGSF3    |
| 7918913 | -0,26 | -1,20 | 0,18564 | 3,09  | 8,51   | 0,00065 | NM_001542      | BMP6     |
| 8116818 | -0,26 | -1,20 | 0,40737 | -0,05 | -1,03  | 0,82989 | NM_001718      | ZNF2     |
| 8043512 | -0,26 | -1,20 | 0,19013 | 0,05  | 1,04   | 0,85063 | NM_021088      | SLC45A4  |
| 8153262 | -0,26 | -1,20 | 0,55073 | 1,75  | 3,36   | 0,01253 | NM_001080431   | KGFLP2   |
| 8161478 | -0,26 | -1,20 | 0,54439 | -0,09 | -1,06  | 0,75261 | NR_003670      | SLC5A4   |
| 8075569 | -0,26 | -1,20 | 0,51049 | -0,34 | -1,27  | 0,18745 | NM_014227      | EYS      |
| 8127391 | -0,26 | -1,20 | 0,45950 | 1,71  | 3,28   | 0,03126 | NM_001142800   | ERP27    |
| 7961524 | -0,26 | -1,20 | 0,42355 | -0,91 | -1,88  | 0,03116 | NM_152321      | GPR137   |
| 7940959 | -0,26 | -1,20 | 0,34183 | 1,42  | 2,68   | 0,03384 | NM_001170880   | PYGM     |
| 7949124 | -0,26 | -1,20 | 0,26513 | -0,56 | -1,48  | 0,00454 | NM_005609      | BAT2L1   |
| 8164649 | -0,26 | -1,20 | 0,21333 | -0,04 | -1,03  | 0,90740 | NM_013318      | UGT2A1   |
| 8100791 | -0,26 | -1,20 | 0,50198 | -1,45 | -2,73  | 0,00990 | NM_006798      | HSF2BP   |
| 8070689 | -0,26 | -1,20 | 0,14365 | 0,84  | 1,79   | 0,02441 | NM_007031      | SLC17A9  |
| 8064014 | -0,26 | -1,20 | 0,69947 | -1,29 | -2,44  | 0,00737 | NM_022082      | OR4A15   |
| 7939918 | -0,26 | -1,20 | 0,58742 | -1,31 | -2,48  | 0,00135 | NM_001005275   | IL1F6    |
| 8044548 | -0,26 | -1,20 | 0,39711 | -1,28 | -2,43  | 0,00046 | NM_014440      | ---      |
| 8074897 | -0,26 | -1,20 | 0,42854 | -0,64 | -1,56  | 0,00082 | --- FAM18B2    | ---      |
| 8012924 | -0,26 | -1,20 | 0,04364 | -0,88 | -1,84  | 0,04359 | NM_145301      | TRMT61B  |
| 8051226 | -0,26 | -1,20 | 0,61271 | 2,92  | 7,56   | 0,00202 | NM_017910      | ---      |
| 7937037 | -0,26 | -1,20 | 0,59623 | -1,27 | -2,42  | 0,08655 | --- ---        | ---      |
| 8067303 | -0,26 | -1,20 | 0,51018 | -0,26 | -1,20  | 0,31458 | --- TC2N       | ---      |
| 7980891 | -0,26 | -1,20 | 0,62388 | 1,77  | 3,41   | 0,01343 | NM_001128596   | MLLT6    |
| 8006788 | -0,26 | -1,20 | 0,40530 | 0,39  | 1,31   | 0,41111 | NM_005937      | ZNF564   |
| 8034401 | -0,26 | -1,20 | 0,66297 | 0,69  | 1,61   | 0,13693 | NM_144976      | C21orf59 |
| 8069998 | -0,26 | -1,20 | 0,22239 | 1,95  | 3,85   | 0,00019 | AF282851 MEIG1 | ---      |
| 7926330 | -0,26 | -1,20 | 0,44805 | -0,72 | -1,65  | 0,00821 | NM_001080836   | OR1L4    |
| 8157686 | -0,26 | -1,20 | 0,26001 | -0,54 | -1,46  | 0,02387 | NM_001005235   | C21orf56 |
| 8070953 | -0,26 | -1,20 | 0,56739 | 0,20  | 1,15   | 0,29151 | NM_001142854   | ---      |
| 7957549 | -0,26 | -1,20 | 0,62683 | 2,19  | 4,55   | 0,00606 | --- LPHN1      | ---      |
| 8034783 | -0,26 | -1,20 | 0,56017 | 2,46  | 5,50   | 0,00601 | NM_001008701   | NLGN2    |
| 8004385 | -0,26 | -1,20 | 0,44458 | 0,87  | 1,82   | 0,18907 | NM_020795      | ---      |
| 7952984 | -0,26 | -1,20 | 0,15282 | -0,98 | -1,97  | 0,07780 | --- OR7E5P     | ---      |
| 7948113 | -0,26 | -1,20 | 0,83647 | -1,16 | -2,24  | 0,13074 | NR_027688      | ING2     |
| 8098508 | -0,26 | -1,20 | 0,72944 | 0,21  | 1,16   | 0,27662 | NM_001564      | LY6G5B   |
| 8118228 | -0,26 | -1,20 | 0,21989 | 0,56  | 1,48   | 0,08202 | NM_021221      | TMEM91   |
| 8029056 | -0,26 | -1,20 | 0,50621 | 0,35  | 1,27   | 0,44903 | NM_001042595   | BARD1    |
| 8058695 | -0,26 | -1,20 | 0,69895 | 1,60  | 3,04   | 0,00084 | NM_000465      | PTGR2    |
| 7975632 | -0,26 | -1,20 | 0,38482 | 1,46  | 2,75   | 0,00409 | NM_152444      | ---      |
| 8039210 | -0,26 | -1,20 | 0,13177 | -0,93 | -1,91  | 0,01180 | --- SCARNA9    | ---      |
| 7943160 | -0,26 | -1,20 | 0,23429 | -0,59 | -1,50  | 0,07269 | NR_002569      | ---      |
| 8136654 | -0,26 | -1,20 | 0,79772 | -3,55 | -11,70 | 0,00011 | --- ---        | ---      |
| 7973820 | -0,26 | -1,20 | 0,04612 | -0,64 | -1,55  | 0,01395 | --- CDC42EP4   | ---      |
| 8018107 | -0,26 | -1,20 | 0,24464 | 0,44  | 1,36   | 0,25918 | NM_012121      | MAP2K6   |
| 8009476 | -0,26 | -1,20 | 0,04684 | 0,18  | 1,14   | 0,43140 | NM_002758      | FLJ44838 |
| 8019751 | -0,26 | -1,20 | 0,60737 | -0,63 | -1,55  | 0,07486 | AK126788 ITPKC | ---      |
| 8028908 | -0,26 | -1,20 | 0,40899 | 0,23  | 1,17   | 0,44896 | NM_025194      | LY6G5B   |
| 8178059 | -0,26 | -1,20 | 0,15638 | 0,96  | 1,94   | 0,08994 | NM_021221      | CPXM2    |
| 7936835 | -0,27 | -1,20 | 0,27155 | -1,27 | -2,42  | 0,04013 | NM_198148      | ZNF419   |
| 8031750 | -0,27 | -1,20 | 0,49740 | -0,40 | -1,32  | 0,17552 | NM_001098491   | ---      |
| 7906433 | -0,27 | -1,20 | 0,55337 | -2,67 | -6,38  | 0,00222 | --- OR1D5      | ---      |
| 8011320 | -0,27 | -1,20 | 0,73136 | -2,99 | -7,92  | 0,00915 | NM_014566      | PPP1R8   |
| 7914139 | -0,27 | -1,20 | 0,70560 | 0,19  | 1,14   | 0,70606 | NM_014110      | POLR3H   |
| 8076344 | -0,27 | -1,20 | 0,42792 | 0,24  | 1,18   | 0,48212 | NM_001018050   | TERF2    |
| 8002289 | -0,27 | -1,20 | 0,28331 | 0,79  | 1,73   | 0,03716 | NM_005652      | PBLD     |
| 7933982 | -0,27 | -1,20 | 0,25910 | -0,09 | -1,07  | 0,29385 | NM_022129      | ARHGDI6  |
| 7991809 | -0,27 | -1,20 | 0,37077 | -0,15 | -1,11  | 0,73861 | NM_001176      | CCRL1    |
| 8082745 | -0,27 | -1,20 | 0,57071 | -1,47 | -2,77  | 0,00094 | NM_178445      | C1orf101 |
| 7911056 | -0,27 | -1,20 | 0,44723 | 0,46  | 1,38   | 0,10295 | NM_001130957   | HLA-DOB  |
| 8125470 | -0,27 | -1,20 | 0,32290 | 0,21  | 1,15   | 0,60779 | NM_002120      | FAM154A  |
| 8160278 | -0,27 | -1,20 | 0,09246 | -0,45 | -1,37  | 0,06112 | AK292245 ---   | ---      |
| 8172272 | -0,27 | -1,20 | 0,29261 | -0,70 | -1,63  | 0,00238 | --- MOCS3      | ---      |
| 8063427 | -0,27 | -1,20 | 0,49885 | 0,38  | 1,30   | 0,18930 | NM_014484      | PLSCR2   |
| 8091318 | -0,27 | -1,20 | 0,34523 | -0,73 | -1,66  | 0,03565 | NM_020359      | ---      |
| 8101235 | -0,27 | -1,20 | 0,75384 | -2,46 | -5,51  | 0,04480 | --- DPP6       | ---      |
| 8137485 | -0,27 | -1,20 | 0,53314 | -0,60 | -1,51  | 0,00432 | NM_001039350   | CIT      |
| 7966878 | -0,27 | -1,20 | 0,44958 | 1,87  | 3,66   | 0,00511 | NM_007174      | CAMK1G   |
| 7909425 | -0,27 | -1,20 | 0,50187 | -0,88 | -1,83  | 0,02165 | NM_020439      | PLCL1    |
| 8047248 | -0,27 | -1,20 | 0,56474 | -1,01 | -2,01  | 0,03435 | NM_006226      | PATZ1    |

|         |       |       |         |       |       |         |                 |            |
|---------|-------|-------|---------|-------|-------|---------|-----------------|------------|
| 8075493 | -0,27 | -1,20 | 0,28233 | 1,25  | 2,37  | 0,02860 | NM_014323       | NOX1       |
| 8173979 | -0,27 | -1,20 | 0,24659 | -0,73 | -1,66 | 0,01087 | NM_007052       | MAEA       |
| 8093462 | -0,27 | -1,20 | 0,26859 | 1,04  | 2,06  | 0,08870 | NM_001017405    | MYO22      |
| 8097086 | -0,27 | -1,20 | 0,46705 | -0,84 | -1,79 | 0,00465 | NM_016599       | MIR96      |
| 8142882 | -0,27 | -1,20 | 0,31188 | -0,36 | -1,28 | 0,02228 | NR_029512       | SPTB       |
| 7979615 | -0,27 | -1,20 | 0,33118 | -0,13 | -1,10 | 0,65293 | NM_001024858    | CDKL4      |
| 8051696 | -0,27 | -1,20 | 0,09050 | -1,06 | -2,09 | 0,07935 | NM_001009565    | FLJ46010   |
| 8105731 | -0,27 | -1,20 | 0,13669 | -1,07 | -2,11 | 0,05723 | AK127903 GRIP1  |            |
| 7964759 | -0,27 | -1,20 | 0,49457 | 0,42  | 1,34  | 0,15271 | NM_021150       | TGIF2      |
| 8062319 | -0,27 | -1,20 | 0,32579 | 0,47  | 1,39  | 0,17373 | NM_021809       | ---        |
| 7955076 | -0,27 | -1,20 | 0,68863 | -0,53 | -1,44 | 0,13121 | --- FAM74A7     |            |
| 8161407 | -0,27 | -1,20 | 0,72429 | -1,43 | -2,69 | 0,00159 | ENST00000452734 | RHO        |
| 8082552 | -0,27 | -1,20 | 0,62157 | -1,57 | -2,98 | 0,00011 | NM_000539       | ZNF19      |
| 8002547 | -0,27 | -1,20 | 0,29615 | -0,47 | -1,38 | 0,00742 | NM_006961       | RHBG       |
| 7906163 | -0,27 | -1,21 | 0,59702 | -0,45 | -1,37 | 0,24114 | NM_020407       | ---        |
| 8112258 | -0,27 | -1,21 | 0,74157 | -0,72 | -1,65 | 0,14296 | --- DENND4B     |            |
| 7920354 | -0,27 | -1,21 | 0,53650 | 2,53  | 5,76  | 0,00810 | NM_014856       | PLXNB1     |
| 8086908 | -0,27 | -1,21 | 0,54145 | 0,78  | 1,71  | 0,04715 | NM_001130082    | DHX16      |
| 8124775 | -0,27 | -1,21 | 0,52808 | 2,75  | 6,75  | 0,00067 | NM_003587       | ---        |
| 8058912 | -0,27 | -1,21 | 0,38650 | -0,66 | -1,58 | 0,02699 | --- OR2AP1      |            |
| 7956005 | -0,27 | -1,21 | 0,05849 | -0,44 | -1,36 | 0,00858 | ENST00000321688 | SETD1B     |
| 7959314 | -0,27 | -1,21 | 0,18432 | 0,83  | 1,78  | 0,16083 | NM_015048       | TCTEX1D1   |
| 7902158 | -0,27 | -1,21 | 0,58703 | -1,05 | -2,07 | 0,07001 | NM_152665       | ---        |
| 8054412 | -0,27 | -1,21 | 0,58118 | -0,53 | -1,44 | 0,00601 | --- C11orf2     |            |
| 7941136 | -0,27 | -1,21 | 0,63744 | 1,75  | 3,35  | 0,00827 | NM_013265       | ADAM29     |
| 8098368 | -0,27 | -1,21 | 0,41677 | -1,34 | -2,54 | 0,00449 | NM_014269       | ---        |
| 8043570 | -0,27 | -1,21 | 0,52352 | -0,50 | -1,41 | 0,02624 | --- ELP1P       |            |
| 8052594 | -0,27 | -1,21 | 0,31078 | -0,99 | -1,99 | 0,00328 | AF229803 SPIC   |            |
| 7957962 | -0,27 | -1,21 | 0,50967 | -0,87 | -1,82 | 0,28377 | NM_152323       | SPATC1     |
| 8148703 | -0,27 | -1,21 | 0,51916 | -1,17 | -2,26 | 0,00144 | NM_198572       | KIF4B      |
| 8109484 | -0,27 | -1,21 | 0,00886 | 0,42  | 1,34  | 0,39566 | NM_001099293    | DUS4L      |
| 8135410 | -0,27 | -1,21 | 0,41990 | 1,73  | 3,32  | 0,00386 | NM_181581       | CCDC82     |
| 7951157 | -0,27 | -1,21 | 0,34095 | -1,51 | -2,85 | 0,01648 | AK313893 GPR56  |            |
| 7996081 | -0,27 | -1,21 | 0,58073 | 1,88  | 3,69  | 0,01417 | NM_201524       | ALDOB      |
| 8162884 | -0,27 | -1,21 | 0,18334 | -0,61 | -1,53 | 0,02122 | NM_000035       | ---        |
| 8151927 | -0,27 | -1,21 | 0,75786 | -1,06 | -2,08 | 0,09546 | --- CES2        |            |
| 7996345 | -0,27 | -1,21 | 0,34583 | 1,22  | 2,33  | 0,02433 | NM_003869       | DGCR2      |
| 8074349 | -0,27 | -1,21 | 0,35413 | 1,65  | 3,13  | 0,02327 | NM_005137       | ---        |
| 8047852 | -0,27 | -1,21 | 0,36175 | -0,83 | -1,78 | 0,03224 | --- C6orf162    |            |
| 8121002 | -0,27 | -1,21 | 0,26647 | 0,78  | 1,72  | 0,02371 | NM_001042493    | THEM5      |
| 7920100 | -0,27 | -1,21 | 0,39621 | -1,23 | -2,34 | 0,00314 | NM_182578       | IQSEC1     |
| 8085412 | -0,27 | -1,21 | 0,36147 | 1,74  | 3,34  | 0,03309 | NM_001134382    | LMOD2      |
| 8135821 | -0,27 | -1,21 | 0,07636 | -0,86 | -1,82 | 0,05895 | NM_207163       | C9orf53    |
| 8154654 | -0,27 | -1,21 | 0,59838 | -1,09 | -2,13 | 0,03193 | NR_024274       | ---        |
| 8008963 | -0,27 | -1,21 | 0,50197 | -0,96 | -1,94 | 0,05940 | --- C12orf47    |            |
| 7966441 | -0,27 | -1,21 | 0,39173 | 0,63  | 1,55  | 0,22838 | NR_015404       | CST5       |
| 8065421 | -0,27 | -1,21 | 0,49520 | -0,22 | -1,17 | 0,14376 | NM_001900       | SKIV2L     |
| 8179364 | -0,27 | -1,21 | 0,56588 | 1,54  | 2,91  | 0,00218 | NM_006929       | ITGA10     |
| 7904761 | -0,27 | -1,21 | 0,21638 | -1,38 | -2,60 | 0,05599 | NM_003637       | SH3TC2     |
| 8114991 | -0,27 | -1,21 | 0,54130 | -1,69 | -3,23 | 0,01906 | NM_024577       | SNRPG      |
| 8052861 | -0,27 | -1,21 | 0,49822 | 0,03  | 1,02  | 0,90530 | NM_003096       | PM20D2     |
| 8121087 | -0,27 | -1,21 | 0,29016 | 3,44  | 10,87 | 0,00053 | NM_001010853    | ---        |
| 8081034 | -0,27 | -1,21 | 0,19053 | -0,86 | -1,82 | 0,06022 | --- DYRK3       |            |
| 7909225 | -0,27 | -1,21 | 0,44487 | 0,49  | 1,41  | 0,10752 | NM_001004023    | KGFLP2     |
| 8161458 | -0,27 | -1,21 | 0,66354 | -0,34 | -1,26 | 0,14124 | NR_003670       | ---        |
| 8039769 | -0,27 | -1,21 | 0,45439 | -1,17 | -2,25 | 0,11314 | --- MIR183      |            |
| 8142884 | -0,27 | -1,21 | 0,02482 | -0,28 | -1,21 | 0,14309 | NR_029615       | ---        |
| 8085118 | -0,27 | -1,21 | 0,67329 | -0,92 | -1,89 | 0,01431 | --- FTSJ1       |            |
| 8167270 | -0,27 | -1,21 | 0,26654 | 1,36  | 2,57  | 0,05251 | NM_177439       | WDR13      |
| 8167322 | -0,27 | -1,21 | 0,34464 | 1,01  | 2,01  | 0,04797 | NM_017883       | GLTSCR2    |
| 7986323 | -0,27 | -1,21 | 0,60718 | 0,26  | 1,20  | 0,69003 | NM_015710       | GOLGA6B    |
| 7985221 | -0,27 | -1,21 | 0,87134 | 1,34  | 2,54  | 0,13132 | NM_018652       | MIP        |
| 7964177 | -0,27 | -1,21 | 0,28180 | -1,23 | -2,35 | 0,00625 | NM_012064       | C12orf59   |
| 7953936 | -0,27 | -1,21 | 0,34287 | -0,94 | -1,92 | 0,00072 | NM_153022       | MUSTN1     |
| 8088047 | -0,27 | -1,21 | 0,30622 | -0,32 | -1,25 | 0,33603 | NM_205853       | ---        |
| 7965110 | -0,27 | -1,21 | 0,36843 | -0,98 | -1,97 | 0,13831 | --- ALK         |            |
| 8051241 | -0,27 | -1,21 | 0,41753 | -1,38 | -2,60 | 0,00506 | NM_004304       | CYB5D2     |
| 8003850 | -0,28 | -1,21 | 0,64872 | 0,76  | 1,70  | 0,17089 | NM_144611       | IFT122     |
| 8082523 | -0,28 | -1,21 | 0,49704 | 0,01  | 1,00  | 0,98349 | NM_052985       | NFYB       |
| 8089459 | -0,28 | -1,21 | 0,18624 | -1,00 | -2,00 | 0,00182 | NM_006166       | CHKB-CPT1B |
| 8077123 | -0,28 | -1,21 | 0,25391 | 0,77  | 1,70  | 0,05678 | NR_027928       | ASB9       |
| 8171392 | -0,28 | -1,21 | 0,18947 | -0,24 | -1,18 | 0,39796 | NM_024087       | MUC20      |
| 8084895 | -0,28 | -1,21 | 0,32786 | -0,99 | -1,99 | 0,05357 | NM_152673       | DHX35      |

|         |       |       |         |       |       |         |                    |           |
|---------|-------|-------|---------|-------|-------|---------|--------------------|-----------|
| 8062576 | -0,28 | -1,21 | 0,56941 | 2,47  | 5,55  | 0,00001 | NM_021931          | CYP4Z1    |
| 7901287 | -0,28 | -1,21 | 0,67172 | -0,99 | -1,99 | 0,01171 | NM_178134          | TTL9      |
| 8061620 | -0,28 | -1,21 | 0,21645 | -0,48 | -1,39 | 0,30980 | NM_001008409       | FOLH1B    |
| 7942998 | -0,28 | -1,21 | 0,02049 | -0,88 | -1,84 | 0,02429 | NM_153696          | LOC554206 |
| 7994235 | -0,28 | -1,21 | 0,19817 | 0,68  | 1,60  | 0,02962 | ENST00000426719    | NINJ1     |
| 8162455 | -0,28 | -1,21 | 0,49544 | 1,91  | 3,75  | 0,00228 | NM_004148          | TIRAP     |
| 7945086 | -0,28 | -1,21 | 0,35621 | 0,70  | 1,62  | 0,07921 | NM_001039661       | CCDC21    |
| 7899134 | -0,28 | -1,21 | 0,36348 | 2,18  | 4,54  | 0,00031 | NM_022778          | DNAH5     |
| 8111019 | -0,28 | -1,21 | 0,07481 | -0,39 | -1,31 | 0,14933 | NM_001369          | PCBD2     |
| 8108174 | -0,28 | -1,21 | 0,33682 | 0,06  | 1,04  | 0,84241 | NM_032151          | ALDH3B2   |
| 7949882 | -0,28 | -1,21 | 0,49435 | -0,98 | -1,98 | 0,00850 | NM_000695          | ---       |
| 8148313 | -0,28 | -1,21 | 0,16892 | -0,71 | -1,63 | 0,01642 | --- SPZ1           | ---       |
| 8106597 | -0,28 | -1,21 | 0,33609 | -0,15 | -1,11 | 0,09245 | NM_032567          | DDR1      |
| 8179184 | -0,28 | -1,21 | 0,57143 | 1,53  | 2,90  | 0,02975 | NM_013993          | IGKC      |
| 8043459 | -0,28 | -1,21 | 0,67970 | -2,52 | -5,74 | 0,00018 | ENST00000390273    | CASP9     |
| 7912646 | -0,28 | -1,21 | 0,70336 | 1,74  | 3,34  | 0,01648 | NM_001229          | DTYMK     |
| 8060286 | -0,28 | -1,21 | 0,32879 | 1,25  | 2,38  | 0,00784 | NM_012145          | DTYMK     |
| 8077262 | -0,28 | -1,21 | 0,32879 | 1,25  | 2,38  | 0,00784 | NM_012145          | TTF1      |
| 8164729 | -0,28 | -1,21 | 0,03482 | -0,16 | -1,12 | 0,63012 | NM_007344          | TRGV3     |
| 8139121 | -0,28 | -1,21 | 0,62116 | -1,46 | -2,76 | 0,10884 | ENST00000390346    | ZNF677    |
| 8039070 | -0,28 | -1,21 | 0,53205 | 0,79  | 1,73  | 0,08761 | NM_182609          | TARP      |
| 8139125 | -0,28 | -1,21 | 0,29369 | -1,71 | -3,28 | 0,06084 | BC030554 JMJD1C    | ---       |
| 7927784 | -0,28 | -1,21 | 0,65099 | -1,06 | -2,08 | 0,04805 | NM_032776          | FLJ25328  |
| 8026503 | -0,28 | -1,21 | 0,60790 | -0,97 | -1,96 | 0,08629 | NR_024335          | SETD4     |
| 8070215 | -0,28 | -1,21 | 0,51369 | 0,17  | 1,13  | 0,55021 | NM_017438          | ---       |
| 7991465 | -0,28 | -1,21 | 0,75430 | -1,30 | -2,46 | 0,00358 | --- OR8D1          | ---       |
| 7952392 | -0,28 | -1,21 | 0,40321 | -1,14 | -2,20 | 0,01186 | NM_001002917       | DAPK3     |
| 8032718 | -0,28 | -1,21 | 0,47732 | 2,16  | 4,48  | 0,00544 | NM_001348          | VTRNA1-3  |
| 8108631 | -0,28 | -1,21 | 0,49565 | -0,52 | -1,43 | 0,23595 | NR_026705          | PLD6      |
| 8013068 | -0,28 | -1,21 | 0,46517 | -0,56 | -1,47 | 0,13236 | NM_178836          | ---       |
| 8056792 | -0,28 | -1,21 | 0,80684 | 0,33  | 1,26  | 0,69384 | --- MFSD4          | ---       |
| 7909127 | -0,28 | -1,21 | 0,30858 | 0,00  | -1,00 | 0,99597 | NM_181644          | RSPH1     |
| 8070603 | -0,28 | -1,21 | 0,34721 | -0,47 | -1,39 | 0,00639 | NM_080860          | SYBU      |
| 8152355 | -0,28 | -1,21 | 0,60214 | 0,50  | 1,41  | 0,24168 | NM_001099750       | AMELY     |
| 8177061 | -0,28 | -1,21 | 0,51138 | -1,19 | -2,29 | 0,02291 | NM_001143          | ---       |
| 8069448 | -0,28 | -1,21 | 0,74774 | 0,09  | 1,07  | 0,87113 | --- CDRT1          | ---       |
| 8012928 | -0,28 | -1,21 | 0,09833 | -0,64 | -1,56 | 0,16029 | AF337810 C21orf105 | ---       |
| 8070629 | -0,28 | -1,21 | 0,04977 | -0,82 | -1,77 | 0,00133 | BC005107 FAM128A   | ---       |
| 8055287 | -0,28 | -1,21 | 0,70501 | 0,75  | 1,68  | 0,11661 | NM_001085365       | ---       |
| 8107198 | -0,28 | -1,21 | 0,52402 | -1,12 | -2,18 | 0,05470 | --- DOCK6          | ---       |
| 8034151 | -0,28 | -1,21 | 0,50675 | 1,97  | 3,91  | 0,00419 | NM_020812          | ART3      |
| 8095806 | -0,28 | -1,21 | 0,55410 | -0,90 | -1,86 | 0,12658 | NM_001130016       | ADCY7     |
| 7995492 | -0,28 | -1,21 | 0,19276 | 1,66  | 3,16  | 0,02964 | NM_001114          | FMO6P     |
| 7907260 | -0,28 | -1,21 | 0,60202 | -1,10 | -2,14 | 0,00493 | NR_002601          | ---       |
| 7948375 | -0,28 | -1,21 | 0,37873 | -0,54 | -1,46 | 0,00432 | ---                | ---       |
| 8043429 | -0,28 | -1,21 | 0,58545 | -0,88 | -1,84 | 0,03881 | ---                | ---       |
| 8053720 | -0,28 | -1,21 | 0,58545 | -0,88 | -1,84 | 0,03881 | --- KIAA1024L      | ---       |
| 8107847 | -0,28 | -1,21 | 0,47032 | -1,08 | -2,12 | 0,00191 | ENST00000334562    | ---       |
| 7906950 | -0,28 | -1,22 | 0,14416 | -1,30 | -2,46 | 0,03817 | --- CCDC158        | ---       |
| 8101174 | -0,28 | -1,22 | 0,28968 | -0,57 | -1,48 | 0,01771 | NM_001042784       | USP35     |
| 7942798 | -0,28 | -1,22 | 0,38532 | 0,22  | 1,16  | 0,60317 | NM_020798          | SNORD117  |
| 8124940 | -0,28 | -1,22 | 0,39188 | -0,82 | -1,77 | 0,08730 | NR_003140          | PRPF40B   |
| 7955250 | -0,28 | -1,22 | 0,22296 | -0,76 | -1,69 | 0,21277 | NM_012272          | MDH1B     |
| 8058462 | -0,28 | -1,22 | 0,43094 | -0,23 | -1,17 | 0,29149 | NM_001039845       | SFXN5     |
| 8052979 | -0,28 | -1,22 | 0,38124 | 0,23  | 1,18  | 0,50594 | NM_144579          | PRKX      |
| 8171182 | -0,28 | -1,22 | 0,12689 | 0,43  | 1,35  | 0,21623 | NM_005044          | MUC6      |
| 7945595 | -0,28 | -1,22 | 0,34683 | -1,32 | -2,50 | 0,03621 | NM_005961          | OR5A51    |
| 7939959 | -0,28 | -1,22 | 0,22505 | -0,95 | -1,94 | 0,01714 | NM_001001921       | CHRNA1    |
| 8004416 | -0,28 | -1,22 | 0,35360 | 4,31  | 19,77 | 0,00011 | NM_000747          | RXRB      |
| 8125638 | -0,28 | -1,22 | 0,66056 | 2,50  | 5,67  | 0,00077 | NM_021976          | CD96      |
| 8081564 | -0,28 | -1,22 | 0,16400 | -1,42 | -2,68 | 0,01584 | NM_198196          | TRPV3     |
| 8011354 | -0,28 | -1,22 | 0,18726 | -0,15 | -1,11 | 0,33354 | NM_145068          | ---       |
| 8075160 | -0,28 | -1,22 | 0,56052 | -0,50 | -1,41 | 0,09381 | --- OR10A7         | ---       |
| 7955983 | -0,28 | -1,22 | 0,61746 | -1,06 | -2,09 | 0,00407 | NM_001005280       | ---       |
| 8168079 | -0,28 | -1,22 | 0,77688 | -1,18 | -2,27 | 0,18390 | --- LHFP13         | ---       |
| 8135262 | -0,28 | -1,22 | 0,34033 | -0,70 | -1,63 | 0,04493 | NM_199000          | SETBP1    |
| 8021047 | -0,28 | -1,22 | 0,36929 | -2,09 | -4,27 | 0,02715 | NM_015559          | PAGE2B    |
| 8167862 | -0,28 | -1,22 | 0,63980 | -1,02 | -2,02 | 0,03989 | NM_001015038       | ---       |
| 7932786 | -0,28 | -1,22 | 0,59713 | -2,07 | -4,19 | 0,00132 | --- DTX3           | ---       |
| 7956539 | -0,28 | -1,22 | 0,49829 | 0,68  | 1,60  | 0,01483 | NM_178502          | SKIV2L    |
| 8118367 | -0,28 | -1,22 | 0,49423 | 1,47  | 2,78  | 0,00218 | NM_006929          | SKIV2L    |
| 8178136 | -0,28 | -1,22 | 0,49423 | 1,47  | 2,78  | 0,00218 | NM_006929          | ---       |
| 7953934 | -0,28 | -1,22 | 0,33107 | -0,87 | -1,83 | 0,00223 | --- NEIL2          | ---       |

|         |       |       |         |       |       |         |                  |           |
|---------|-------|-------|---------|-------|-------|---------|------------------|-----------|
| 8144658 | -0,28 | -1,22 | 0,64241 | 0,88  | 1,85  | 0,09763 | NM_145043        | FAM86A    |
| 7999304 | -0,28 | -1,22 | 0,46025 | 1,09  | 2,13  | 0,13956 | NM_201400        | DPYS      |
| 8152264 | -0,28 | -1,22 | 0,58055 | -1,26 | -2,40 | 0,03362 | NM_001385        | CLDN17    |
| 8069790 | -0,28 | -1,22 | 0,56621 | -1,43 | -2,70 | 0,00357 | NM_012131        | SLC2A9    |
| 8099326 | -0,28 | -1,22 | 0,33104 | -1,12 | -2,17 | 0,00808 | NM_020041        | ---       |
| 8017825 | -0,28 | -1,22 | 0,20367 | -1,15 | -2,22 | 0,02136 | --- ZNF641       | ---       |
| 7962794 | -0,28 | -1,22 | 0,27428 | 1,67  | 3,18  | 0,09270 | NM_152320        | CHCHD5    |
| 8044491 | -0,28 | -1,22 | 0,37259 | -0,34 | -1,27 | 0,14483 | NM_032309        | C2orf61   |
| 8052004 | -0,28 | -1,22 | 0,64132 | -0,99 | -1,99 | 0,00421 | NM_173649        | ---       |
| 8114363 | -0,28 | -1,22 | 0,73764 | -1,61 | -3,06 | 0,23642 | --- ENAM         | ---       |
| 8095535 | -0,29 | -1,22 | 0,58400 | -2,18 | -4,52 | 0,00129 | NM_031889        | ZNF407    |
| 8021756 | -0,29 | -1,22 | 0,54696 | 0,27  | 1,21  | 0,55756 | NM_017757        | IFNA6     |
| 8160417 | -0,29 | -1,22 | 0,40947 | -0,92 | -1,89 | 0,00701 | NM_021002        | C9orf96   |
| 8159017 | -0,29 | -1,22 | 0,58492 | -0,13 | -1,09 | 0,51519 | NM_153710        | ---       |
| 8047213 | -0,29 | -1,22 | 0,42012 | -0,78 | -1,71 | 0,00025 | --- SLC10A5      | ---       |
| 8151559 | -0,29 | -1,22 | 0,12944 | 3,56  | 11,76 | 0,00167 | NM_001010893     | FAM134B   |
| 8111136 | -0,29 | -1,22 | 0,02870 | 0,11  | 1,08  | 0,40667 | NM_001034850     | ---       |
| 7962341 | -0,29 | -1,22 | 0,38681 | -0,58 | -1,49 | 0,00341 | --- ZNF678       | ---       |
| 7910198 | -0,29 | -1,22 | 0,49377 | 0,31  | 1,24  | 0,47998 | NM_178549        | WISP1     |
| 8148435 | -0,29 | -1,22 | 0,53583 | -1,67 | -3,18 | 0,00186 | NM_003882        | HLA-DQB1  |
| 8125461 | -0,29 | -1,22 | 0,41768 | -0,46 | -1,38 | 0,49189 | AK097297 C4orf11 | ---       |
| 8101359 | -0,29 | -1,22 | 0,58320 | -1,19 | -2,28 | 0,00281 | ENST00000426551  | APOF      |
| 7964142 | -0,29 | -1,22 | 0,50014 | -0,73 | -1,66 | 0,05136 | NM_001638        | ---       |
| 8107131 | -0,29 | -1,22 | 0,40472 | -1,94 | -3,84 | 0,00516 | --- GNL1         | ---       |
| 8124742 | -0,29 | -1,22 | 0,24806 | -0,06 | -1,04 | 0,88231 | NM_005275        | SH3BP1    |
| 8075963 | -0,29 | -1,22 | 0,53286 | -0,75 | -1,69 | 0,06113 | AY364241 ---     | ---       |
| 8001455 | -0,29 | -1,22 | 0,58609 | -1,67 | -3,19 | 0,00012 | --- SLC4A9       | ---       |
| 8108483 | -0,29 | -1,22 | 0,48139 | -0,29 | -1,22 | 0,03981 | NM_031467        | KCNE4     |
| 8048749 | -0,29 | -1,22 | 0,55497 | -1,25 | -2,37 | 0,06396 | NM_080671        | CD163L1   |
| 7960771 | -0,29 | -1,22 | 0,35645 | -0,85 | -1,80 | 0,00030 | NM_174941        | KLC2      |
| 7941565 | -0,29 | -1,22 | 0,16232 | 0,80  | 1,74  | 0,15068 | NM_022822        | PDZD4     |
| 8175860 | -0,29 | -1,22 | 0,52360 | -0,56 | -1,47 | 0,28002 | NM_032512        | SLC1A5    |
| 8029854 | -0,29 | -1,22 | 0,67562 | -0,44 | -1,35 | 0,02274 | NM_005628        | XKRX      |
| 8173999 | -0,29 | -1,22 | 0,20703 | -0,12 | -1,09 | 0,22833 | NM_212559        | BPIL1     |
| 8061780 | -0,29 | -1,22 | 0,38290 | -0,90 | -1,87 | 0,00490 | NM_025227        | TBC1D10B  |
| 8000856 | -0,29 | -1,22 | 0,61241 | 1,36  | 2,56  | 0,00776 | NM_015527        | AQP7      |
| 8160663 | -0,29 | -1,22 | 0,61484 | -1,34 | -2,54 | 0,05978 | NM_001170        | ARAF2P    |
| 8133021 | -0,29 | -1,22 | 0,46855 | -0,93 | -1,91 | 0,01540 | BC033982 ARAF2P  | ---       |
| 8139804 | -0,29 | -1,22 | 0,46855 | -0,93 | -1,91 | 0,01540 | BC033982 ---     | ---       |
| 8042157 | -0,29 | -1,22 | 0,15462 | -0,88 | -1,84 | 0,01404 | --- ART5         | ---       |
| 7945882 | -0,29 | -1,22 | 0,30260 | -1,18 | -2,26 | 0,02955 | NM_053017        | TRIM41    |
| 8110649 | -0,29 | -1,22 | 0,27617 | 0,67  | 1,59  | 0,39458 | NM_033549        | VLDLR     |
| 8159850 | -0,29 | -1,22 | 0,31032 | -1,19 | -2,28 | 0,03413 | NM_003383        | H6PD      |
| 7897441 | -0,29 | -1,22 | 0,64021 | 1,95  | 3,86  | 0,01053 | NM_004285        | C11orf52  |
| 7943795 | -0,29 | -1,22 | 0,04163 | 0,35  | 1,28  | 0,25477 | NM_080659        | FUT6      |
| 8033043 | -0,29 | -1,22 | 0,27618 | -0,86 | -1,81 | 0,00004 | NM_000150        | FLJ46111  |
| 7938309 | -0,29 | -1,22 | 0,56935 | -0,48 | -1,39 | 0,20094 | NR_027713        | AWAT1     |
| 8168107 | -0,29 | -1,22 | 0,10880 | -0,55 | -1,47 | 0,12713 | NM_001013579     | GARNL3    |
| 8157976 | -0,29 | -1,22 | 0,22241 | 1,11  | 2,16  | 0,00611 | NM_032293        | ---       |
| 8114843 | -0,29 | -1,22 | 0,21157 | 0,35  | 1,27  | 0,10359 | --- MRPS28       | ---       |
| 8151471 | -0,29 | -1,22 | 0,36277 | 1,40  | 2,64  | 0,01410 | NM_014018        | ---       |
| 8085060 | -0,29 | -1,22 | 0,17004 | -0,96 | -1,95 | 0,02675 | --- CRYM         | ---       |
| 8000117 | -0,29 | -1,22 | 0,41043 | -0,35 | -1,27 | 0,47617 | NM_001888        | ---       |
| 8174554 | -0,29 | -1,22 | 0,38130 | -0,82 | -1,76 | 0,11876 | --- LPPR4        | ---       |
| 7903214 | -0,29 | -1,22 | 0,27282 | -1,68 | -3,21 | 0,00002 | NM_014839        | SLC22A5   |
| 8107920 | -0,29 | -1,22 | 0,53395 | 2,33  | 5,04  | 0,00609 | NM_003060        | GFI1B     |
| 8158939 | -0,29 | -1,22 | 0,59914 | -0,65 | -1,57 | 0,06435 | NM_004188        | C4A       |
| 8118409 | -0,29 | -1,22 | 0,14903 | -1,25 | -2,38 | 0,02579 | NM_007293        | C4A       |
| 8118455 | -0,29 | -1,22 | 0,14903 | -1,25 | -2,38 | 0,02579 | NM_007293        | C4A       |
| 8179399 | -0,29 | -1,22 | 0,14903 | -1,25 | -2,38 | 0,02579 | NM_007293        | LEPREL2   |
| 7953450 | -0,29 | -1,22 | 0,40573 | -0,87 | -1,82 | 0,08669 | NM_014262        | SLC16A12  |
| 7934936 | -0,29 | -1,22 | 0,47810 | -0,57 | -1,48 | 0,08531 | NM_213606        | C5orf45   |
| 8116335 | -0,29 | -1,22 | 0,46362 | 0,94  | 1,92  | 0,03075 | NM_016175        | LOC284788 |
| 8065339 | -0,29 | -1,22 | 0,46066 | -1,26 | -2,40 | 0,14390 | BC033532 NUDCD2  | ---       |
| 8115666 | -0,29 | -1,22 | 0,47289 | 1,45  | 2,73  | 0,01875 | NM_145266        | PRAME     |
| 8074856 | -0,29 | -1,22 | 0,44402 | 3,33  | 10,03 | 0,00050 | NM_206953        | ---       |
| 8160906 | -0,29 | -1,22 | 0,51120 | -0,98 | -1,98 | 0,12695 | --- CEP63        | ---       |
| 8082827 | -0,29 | -1,22 | 0,34856 | -0,39 | -1,31 | 0,04093 | NM_025180        | PEAR1     |
| 7906264 | -0,29 | -1,22 | 0,20410 | 1,82  | 3,53  | 0,00115 | NM_001080471     | SNRPA1    |
| 7991598 | -0,29 | -1,22 | 0,43958 | -0,63 | -1,55 | 0,05948 | NM_003090        | IDO1      |
| 8146092 | -0,29 | -1,22 | 0,47447 | -1,05 | -2,06 | 0,00292 | NM_002164        | RFX4      |
| 7958305 | -0,29 | -1,22 | 0,48262 | -1,45 | -2,73 | 0,00179 | NM_213594        | LOC729603 |
| 8123230 | -0,29 | -1,22 | 0,28624 | -1,59 | -3,01 | 0,00056 | NR_003288        | C1orf99   |

|         |       |       |         |       |       |         |              |              |
|---------|-------|-------|---------|-------|-------|---------|--------------|--------------|
| 7908371 | -0,29 | -1,22 | 0,23472 | -0,36 | -1,28 | 0,15914 | BC040856     | ---          |
| 8155081 | -0,29 | -1,22 | 0,22809 | -0,89 | -1,86 | 0,05774 | ---          | CYHR1        |
| 8153823 | -0,29 | -1,23 | 0,56586 | 0,98  | 1,97  | 0,10988 | NM_032687    | ---          |
| 8092312 | -0,29 | -1,23 | 0,22535 | -0,58 | -1,50 | 0,06019 | ---          | LOC440313    |
| 7991577 | -0,29 | -1,23 | 0,60935 | -0,70 | -1,62 | 0,09031 | AK127131     | TXNDC2       |
| 8020123 | -0,29 | -1,23 | 0,55420 | -0,72 | -1,64 | 0,28196 | NM_001098529 | SNORD105     |
| 8025584 | -0,29 | -1,23 | 0,47385 | -0,67 | -1,59 | 0,04852 | NR_004381    | ---          |
| 8130436 | -0,29 | -1,23 | 0,51305 | -0,25 | -1,19 | 0,59939 | ---          | IL17RB       |
| 8080562 | -0,29 | -1,23 | 0,37694 | 0,98  | 1,98  | 0,05708 | NM_018725    | FLCN         |
| 8013071 | -0,29 | -1,23 | 0,58477 | 0,82  | 1,76  | 0,05482 | NM_144997    | LRRC18       |
| 7933484 | -0,29 | -1,23 | 0,62197 | -1,63 | -3,10 | 0,00023 | NM_001006939 | SNORD115-17  |
| 7982040 | -0,29 | -1,23 | 0,57472 | -1,35 | -2,55 | 0,00060 | NR_003309    | SNORD115-17  |
| 7982042 | -0,29 | -1,23 | 0,57472 | -1,35 | -2,55 | 0,00060 | NR_003309    | SNORD115-17  |
| 7982044 | -0,29 | -1,23 | 0,57472 | -1,35 | -2,55 | 0,00060 | NR_003309    | ACOT12       |
| 8112920 | -0,29 | -1,23 | 0,00170 | -1,42 | -2,67 | 0,00200 | NM_130767    | RPSAP52      |
| 7964733 | -0,29 | -1,23 | 0,47622 | -0,83 | -1,77 | 0,01988 | NR_026825    | ---          |
| 7969364 | -0,29 | -1,23 | 0,09561 | -1,03 | -2,04 | 0,01288 | ---          | CCR3         |
| 8079383 | -0,29 | -1,23 | 0,09501 | -0,16 | -1,12 | 0,34556 | NM_001837    | ZNF589       |
| 8079598 | -0,29 | -1,23 | 0,00558 | 0,72  | 1,65  | 0,00972 | NM_016089    | TM7SF4       |
| 8147830 | -0,29 | -1,23 | 0,34840 | -0,92 | -1,89 | 0,00631 | NM_030788    | TTC23L       |
| 8104812 | -0,30 | -1,23 | 0,30492 | -0,14 | -1,10 | 0,50684 | NM_144725    | ABCA2        |
| 8165345 | -0,30 | -1,23 | 0,48301 | 2,74  | 6,70  | 0,00560 | NM_001606    | MOBK2A       |
| 8032410 | -0,30 | -1,23 | 0,34887 | -0,07 | -1,05 | 0,81934 | NM_130807    | CD24         |
| 8177222 | -0,30 | -1,23 | 0,21151 | 3,04  | 8,25  | 0,00122 | NM_013230    | ITFG1        |
| 8001233 | -0,30 | -1,23 | 0,10511 | -0,54 | -1,46 | 0,01053 | AK309475     | CECR5        |
| 8074227 | -0,30 | -1,23 | 0,26831 | 1,29  | 2,45  | 0,02333 | NM_033070    | RGS17        |
| 8130394 | -0,30 | -1,23 | 0,48565 | 0,11  | 1,08  | 0,71194 | NM_012419    | GPR116       |
| 8161418 | -0,30 | -1,23 | 0,74955 | -1,85 | -3,61 | 0,00449 | NM_015234    | DBR1         |
| 8090960 | -0,30 | -1,23 | 0,22487 | 0,48  | 1,40  | 0,18418 | NM_016216    | CPNE4        |
| 8090690 | -0,30 | -1,23 | 0,40446 | -0,47 | -1,38 | 0,33613 | NM_130808    | GPN2         |
| 7913978 | -0,30 | -1,23 | 0,17689 | -0,17 | -1,13 | 0,75782 | NM_018066    | C3orf65      |
| 8084627 | -0,30 | -1,23 | 0,47196 | -0,34 | -1,27 | 0,18092 | NR_027317    | SHISA6       |
| 8004955 | -0,30 | -1,23 | 0,54994 | -0,94 | -1,92 | 0,01205 | NM_207386    | C15orf38     |
| 7991367 | -0,30 | -1,23 | 0,66955 | 0,04  | 1,03  | 0,91664 | NM_182616    | OXNAD1       |
| 8078173 | -0,30 | -1,23 | 0,30473 | 2,29  | 4,89  | 0,00030 | NM_138381    | ---          |
| 7998959 | -0,30 | -1,23 | 0,19640 | -0,32 | -1,25 | 0,18893 | ---          | ---          |
| 8014485 | -0,30 | -1,23 | 0,52316 | -0,93 | -1,90 | 0,18510 | ---          | RHCE         |
| 7913835 | -0,30 | -1,23 | 0,25669 | 0,02  | 1,02  | 0,90450 | NM_020485    | MAN2C1       |
| 7990457 | -0,30 | -1,23 | 0,49017 | 0,44  | 1,35  | 0,48301 | NM_006715    | DMP1         |
| 8096274 | -0,30 | -1,23 | 0,35787 | -1,32 | -2,50 | 0,00038 | NM_004407    | COBRA1       |
| 8159654 | -0,30 | -1,23 | 0,52668 | 2,94  | 7,70  | 0,00400 | NM_015456    | PCDH83       |
| 8108688 | -0,30 | -1,23 | 0,62221 | -0,33 | -1,26 | 0,50441 | NM_018937    | SEPX1        |
| 7998637 | -0,30 | -1,23 | 0,53076 | 2,91  | 7,53  | 0,00165 | NM_016332    | ---          |
| 8144947 | -0,30 | -1,23 | 0,46439 | -0,14 | -1,11 | 0,26924 | ---          | NR4A2        |
| 8055952 | -0,30 | -1,23 | 0,43844 | 3,11  | 8,63  | 0,00007 | NM_006186    | OR4A16       |
| 7939916 | -0,30 | -1,23 | 0,17481 | -0,94 | -1,91 | 0,01267 | NM_001005274 | ---          |
| 7907847 | -0,30 | -1,23 | 0,56902 | -1,06 | -2,08 | 0,00059 | ---          | CDKN2AIPNL   |
| 8114185 | -0,30 | -1,23 | 0,38407 | -0,24 | -1,18 | 0,45519 | NM_080656    | SNTN         |
| 8080863 | -0,30 | -1,23 | 0,33814 | -0,41 | -1,33 | 0,16058 | NM_001080537 | TNR          |
| 7922482 | -0,30 | -1,23 | 0,62548 | -0,93 | -1,90 | 0,13263 | NM_003285    | SNORD114-3   |
| 7976816 | -0,30 | -1,23 | 0,09238 | -0,94 | -1,92 | 0,00000 | NR_003195    | FAM87A       |
| 7896756 | -0,30 | -1,23 | 0,60044 | -1,04 | -2,05 | 0,02905 | BC037297     | ---          |
| 7926934 | -0,30 | -1,23 | 0,61865 | -0,76 | -1,69 | 0,00078 | ---          | SNORA71B     |
| 8066256 | -0,30 | -1,23 | 0,30638 | -1,50 | -2,82 | 0,01732 | NR_002910    | ---          |
| 8153039 | -0,30 | -1,23 | 0,69888 | -2,95 | -7,74 | 0,00018 | ---          | SLC24A5      |
| 7983553 | -0,30 | -1,23 | 0,61171 | -0,99 | -1,98 | 0,01215 | NM_205850    | SLC12A1      |
| 7983564 | -0,30 | -1,23 | 0,10507 | -1,11 | -2,16 | 0,00046 | NM_000338    | DDIT4L       |
| 8101952 | -0,30 | -1,23 | 0,34359 | -0,67 | -1,59 | 0,03011 | NM_145244    | LRRC20       |
| 7934145 | -0,30 | -1,23 | 0,29699 | 0,89  | 1,86  | 0,03834 | NM_207119    | ZG16B        |
| 7992732 | -0,30 | -1,23 | 0,51293 | -1,56 | -2,95 | 0,01565 | NM_145252    | MIR509-1     |
| 8175587 | -0,30 | -1,23 | 0,16623 | -1,09 | -2,12 | 0,00410 | NR_030236    | C4orf45      |
| 8103452 | -0,30 | -1,23 | 0,42289 | -0,57 | -1,49 | 0,00133 | NM_152543    | LOC100290146 |
| 8001104 | -0,30 | -1,23 | 0,80503 | -3,25 | -9,53 | 0,00211 | AK289373     | SNAP91       |
| 8127872 | -0,30 | -1,23 | 0,02977 | -0,24 | -1,18 | 0,36943 | NR_026669    | APOBEC1      |
| 7960821 | -0,30 | -1,23 | 0,53277 | -1,18 | -2,27 | 0,00263 | NM_001644    | PPFIA4       |
| 7908879 | -0,30 | -1,23 | 0,25046 | -1,41 | -2,65 | 0,00165 | NM_015053    | ERBB4        |
| 8058627 | -0,30 | -1,23 | 0,31461 | -0,89 | -1,86 | 0,02738 | NM_005235    | YY1          |
| 7976744 | -0,30 | -1,23 | 0,22015 | -0,44 | -1,35 | 0,12641 | NM_003403    | HIST1H4I     |
| 8117537 | -0,30 | -1,23 | 0,41729 | -0,10 | -1,07 | 0,57470 | NM_003495    | ---          |
| 8075190 | -0,30 | -1,23 | 0,12419 | -0,36 | -1,28 | 0,09785 | ---          | OR6Q1        |
| 7940108 | -0,30 | -1,23 | 0,17414 | -0,58 | -1,50 | 0,01726 | NM_001005186 | C1orf183     |
| 7918552 | -0,30 | -1,23 | 0,07455 | -0,71 | -1,64 | 0,02238 | NM_019099    | ---          |
| 7976239 | -0,30 | -1,23 | 0,31569 | -0,55 | -1,46 | 0,07747 | ---          | ---          |

|         |       |       |         |       |        |         |                 |           |
|---------|-------|-------|---------|-------|--------|---------|-----------------|-----------|
| 7929591 | -0,30 | -1,23 | 0,24809 | -0,72 | -1,65  | 0,04111 | ---             | ADAMTS18  |
| 8002941 | -0,30 | -1,23 | 0,40243 | -1,32 | -2,50  | 0,01822 | NM_199355       | LINGO2    |
| 8160546 | -0,30 | -1,23 | 0,64003 | -0,88 | -1,84  | 0,01764 | NM_152570       | ZNF20     |
| 8034334 | -0,30 | -1,23 | 0,48739 | 0,51  | 1,42   | 0,12102 | NM_021143       | DCUN1D2   |
| 7972912 | -0,30 | -1,23 | 0,45280 | 0,79  | 1,73   | 0,02356 | NM_001014283    | MEGF8     |
| 8029236 | -0,30 | -1,23 | 0,42409 | 0,41  | 1,32   | 0,33897 | NM_001410       | IGLJ3     |
| 7981730 | -0,30 | -1,23 | 0,85555 | -4,22 | -18,65 | 0,00014 | AB001736        | PSMC3     |
| 7947867 | -0,30 | -1,23 | 0,37522 | 0,77  | 1,70   | 0,12517 | NM_002804       | ---       |
| 8124086 | -0,30 | -1,23 | 0,55192 | -0,73 | -1,66  | 0,28234 | ---             | C8orf86   |
| 8150352 | -0,30 | -1,23 | 0,57934 | -0,28 | -1,21  | 0,11971 | BC137511        | OR2K2     |
| 8163273 | -0,30 | -1,23 | 0,12933 | 0,01  | 1,01   | 0,97710 | NM_205859       | FBXW4P1   |
| 8071713 | -0,30 | -1,23 | 0,30646 | -0,35 | -1,28  | 0,22082 | NR_033408       | CCL8      |
| 8006453 | -0,30 | -1,23 | 0,61182 | -0,91 | -1,88  | 0,00097 | NM_005623       | ---       |
| 8091099 | -0,30 | -1,23 | 0,08919 | -0,37 | -1,29  | 0,12124 | ---             | SNORA40   |
| 8045423 | -0,30 | -1,23 | 0,27746 | -0,65 | -1,56  | 0,06582 | NR_002973       | TCFL5     |
| 8067554 | -0,30 | -1,23 | 0,44382 | 0,84  | 1,79   | 0,07047 | NM_006602       | SNORD58A  |
| 8023259 | -0,30 | -1,23 | 0,24772 | -0,70 | -1,62  | 0,03824 | NR_002571       | CCL3      |
| 8014369 | -0,30 | -1,23 | 0,59209 | -1,97 | -3,91  | 0,00837 | NM_002983       | AREG      |
| 8095736 | -0,30 | -1,23 | 0,48032 | 4,48  | 22,35  | 0,00018 | NM_001657       | ---       |
| 8082250 | -0,30 | -1,23 | 0,77508 | -2,67 | -6,38  | 0,00908 | ---             | DALRD3    |
| 8087236 | -0,30 | -1,23 | 0,30178 | 0,24  | 1,18   | 0,50037 | NM_001009996    | ---       |
| 8131381 | -0,30 | -1,23 | 0,56791 | -0,01 | -1,01  | 0,94151 | ---             | CCDC141   |
| 8057377 | -0,30 | -1,24 | 0,18424 | -0,65 | -1,57  | 0,01683 | NM_173648       | ---       |
| 7899517 | -0,30 | -1,24 | 0,15016 | -0,92 | -1,89  | 0,00950 | ---             | IL31RA    |
| 8105411 | -0,30 | -1,24 | 0,48131 | 1,96  | 3,90   | 0,00009 | NM_139017       | SERP2     |
| 7968892 | -0,30 | -1,24 | 0,58057 | -1,07 | -2,09  | 0,00094 | NM_001010897    | ASMT      |
| 8165773 | -0,30 | -1,24 | 0,36670 | -0,15 | -1,11  | 0,80553 | NM_001171038    | ASMT      |
| 8176342 | -0,30 | -1,24 | 0,36670 | -0,15 | -1,11  | 0,80553 | NM_001171038    | MIR410    |
| 7976856 | -0,31 | -1,24 | 0,04542 | -0,59 | -1,51  | 0,02941 | NR_030156       | SLC28A3   |
| 8162059 | -0,31 | -1,24 | 0,33298 | -0,59 | -1,51  | 0,06511 | NM_022127       | PCDH85    |
| 8108697 | -0,31 | -1,24 | 0,26031 | 1,77  | 3,41   | 0,00144 | NM_015669       | OR7C2     |
| 8026388 | -0,31 | -1,24 | 0,43217 | -1,23 | -2,35  | 0,01909 | NM_012377       | TCEAL8    |
| 8174228 | -0,31 | -1,24 | 0,33851 | -0,23 | -1,18  | 0,51662 | NM_153333       | PABPC1P2  |
| 8045581 | -0,31 | -1,24 | 0,50017 | 0,39  | 1,31   | 0,04221 | NR_026904       | ---       |
| 8006592 | -0,31 | -1,24 | 0,65632 | -0,44 | -1,36  | 0,09666 | ---             | SLC38A3   |
| 8079931 | -0,31 | -1,24 | 0,30923 | -0,90 | -1,87  | 0,06058 | NM_006841       | ZNF212    |
| 8137112 | -0,31 | -1,24 | 0,40709 | 0,04  | 1,03   | 0,84479 | NM_012256       | ---       |
| 7967089 | -0,31 | -1,24 | 0,54971 | -0,23 | -1,17  | 0,56189 | ---             | UBL3      |
| 7970831 | -0,31 | -1,24 | 0,55512 | 0,64  | 1,55   | 0,02766 | NM_007106       | CSNK1G2   |
| 8024358 | -0,31 | -1,24 | 0,27607 | 1,84  | 3,57   | 0,00766 | NM_001319       | MARS2     |
| 8047243 | -0,31 | -1,24 | 0,27324 | 1,47  | 2,77   | 0,03626 | NM_138395       | SLC45A4   |
| 8153258 | -0,31 | -1,24 | 0,64165 | 1,10  | 2,15   | 0,39713 | BC033223        | NFATC2IP  |
| 7994506 | -0,31 | -1,24 | 0,10063 | 0,90  | 1,86   | 0,12669 | NM_032815       | RNF186    |
| 7913206 | -0,31 | -1,24 | 0,41869 | -1,29 | -2,44  | 0,00364 | NM_019062       | LOC375010 |
| 7919139 | -0,31 | -1,24 | 0,45997 | -0,11 | -1,08  | 0,82380 | AK090412        | DEFB134   |
| 8149350 | -0,31 | -1,24 | 0,32665 | -0,36 | -1,29  | 0,04749 | NM_001033019    | SPANXE    |
| 8175558 | -0,31 | -1,24 | 0,67161 | -1,16 | -2,24  | 0,19403 | NM_145665       | ---       |
| 8099756 | -0,31 | -1,24 | 0,35494 | -1,25 | -2,38  | 0,00417 | ---             | PABPC5    |
| 8168650 | -0,31 | -1,24 | 0,47481 | -0,88 | -1,85  | 0,03160 | NM_080832       | PVRL1     |
| 7952274 | -0,31 | -1,24 | 0,29735 | 0,59  | 1,50   | 0,03384 | NM_002855       | KLRA1     |
| 7961198 | -0,31 | -1,24 | 0,20178 | -0,48 | -1,40  | 0,17030 | NR_028045       | ICA1      |
| 8138202 | -0,31 | -1,24 | 0,39827 | 1,52  | 2,86   | 0,02361 | NM_004968       | CIDEB     |
| 7978272 | -0,31 | -1,24 | 0,59655 | -1,54 | -2,92  | 0,00067 | NM_014430       | MAP2K5    |
| 7984408 | -0,31 | -1,24 | 0,44347 | 1,66  | 3,16   | 0,01022 | NM_145160       | ---       |
| 8058855 | -0,31 | -1,24 | 0,59072 | -0,54 | -1,46  | 0,11202 | ---             | ZSWIM5    |
| 7915682 | -0,31 | -1,24 | 0,46398 | 1,04  | 2,05   | 0,05533 | NM_020883       | VKORC1L1  |
| 8133119 | -0,31 | -1,24 | 0,43522 | -0,67 | -1,59  | 0,18041 | BC014249        | CXCL16    |
| 8011713 | -0,31 | -1,24 | 0,52458 | 3,62  | 12,33  | 0,00001 | NM_022059       | SMAD6     |
| 7984353 | -0,31 | -1,24 | 0,26060 | 0,34  | 1,27   | 0,50601 | NR_027654       | CHSY3     |
| 8107850 | -0,31 | -1,24 | 0,18081 | -1,20 | -2,30  | 0,00337 | NM_175856       | PDE6C     |
| 7929350 | -0,31 | -1,24 | 0,41659 | -0,53 | -1,45  | 0,03760 | NM_006204       | SPTA1     |
| 7921367 | -0,31 | -1,24 | 0,18733 | -1,08 | -2,11  | 0,00577 | NM_003126       | ---       |
| 8131494 | -0,31 | -1,24 | 0,23236 | -0,70 | -1,63  | 0,07274 | ---             | CHRNA1    |
| 8056877 | -0,31 | -1,24 | 0,30707 | -0,52 | -1,44  | 0,15462 | NM_001039523    | NOC4L     |
| 7960068 | -0,31 | -1,24 | 0,02189 | 0,14  | 1,10   | 0,75151 | NM_024078       | BMP2      |
| 8060850 | -0,31 | -1,24 | 0,47901 | -1,18 | -2,27  | 0,02342 | NM_001200       | ZNF688    |
| 8000910 | -0,31 | -1,24 | 0,37190 | -0,14 | -1,10  | 0,29664 | NM_145271       | HNRNPA3P1 |
| 7933192 | -0,31 | -1,24 | 0,53762 | -0,20 | -1,15  | 0,60745 | NR_002726       | ---       |
| 8174644 | -0,31 | -1,24 | 0,33693 | -0,94 | -1,92  | 0,11806 | ---             | NT5DC4    |
| 8044512 | -0,31 | -1,24 | 0,21755 | -0,99 | -1,99  | 0,02531 | ENST00000327581 | ---       |
| 7985087 | -0,31 | -1,24 | 0,02178 | -0,73 | -1,66  | 0,00128 | ---             | THNSL2    |
| 8043393 | -0,31 | -1,24 | 0,58336 | -0,55 | -1,47  | 0,20096 | NM_018271       | ABCB6     |
| 8059111 | -0,31 | -1,24 | 0,38755 | 2,21  | 4,62   | 0,01221 | NM_005689       | NGFRAP1   |

|         |       |       |         |       |       |         |                   |              |
|---------|-------|-------|---------|-------|-------|---------|-------------------|--------------|
| 8169028 | -0,31 | -1,24 | 0,45758 | 0,72  | 1,65  | 0,09117 | NM_206917         | LENG1        |
| 8039139 | -0,31 | -1,24 | 0,42863 | -0,45 | -1,37 | 0,23152 | NM_024316         | ILKAP        |
| 8059969 | -0,31 | -1,24 | 0,19086 | 0,15  | 1,11  | 0,52526 | NM_030768         | ---          |
| 8094148 | -0,31 | -1,24 | 0,13954 | 0,23  | 1,17  | 0,17467 | ---               | ZNF516       |
| 8023882 | -0,31 | -1,24 | 0,15802 | 0,19  | 1,14  | 0,45222 | NM_014643         | ---          |
| 8089232 | -0,31 | -1,24 | 0,30185 | -1,58 | -2,99 | 0,00160 | ---               | SLC26A11     |
| 8010405 | -0,31 | -1,24 | 0,15709 | 1,53  | 2,89  | 0,04306 | NM_001166347      | SEC14L2      |
| 8072328 | -0,31 | -1,24 | 0,41150 | 0,46  | 1,38  | 0,04293 | NM_012429         | ZNF705D      |
| 8144691 | -0,31 | -1,24 | 0,24515 | -0,75 | -1,68 | 0,00989 | NM_001039615      | ---          |
| 7972426 | -0,31 | -1,24 | 0,51146 | -1,33 | -2,52 | 0,02736 | ---               | ---          |
| 8174887 | -0,31 | -1,24 | 0,12963 | -0,59 | -1,51 | 0,00359 | ---               | HMGCLL1      |
| 8127180 | -0,31 | -1,24 | 0,44272 | -1,53 | -2,88 | 0,06269 | NM_019036         | P704P        |
| 8074170 | -0,31 | -1,24 | 0,54269 | -1,99 | -3,96 | 0,00554 | NM_001145442      | SERPINB8     |
| 8021653 | -0,31 | -1,24 | 0,06993 | 0,39  | 1,31  | 0,28004 | NM_002640         | TP53AIP1     |
| 7952631 | -0,31 | -1,24 | 0,33125 | -0,95 | -1,93 | 0,14864 | NM_022112         | CCDC15       |
| 7944913 | -0,31 | -1,24 | 0,21316 | -0,44 | -1,35 | 0,35538 | NM_025004         | APOBEC3D     |
| 8073072 | -0,31 | -1,24 | 0,50285 | -0,60 | -1,51 | 0,04287 | NM_152426         | TAS2R50      |
| 7961281 | -0,31 | -1,24 | 0,28465 | -0,54 | -1,46 | 0,21530 | NM_176890         | F11R         |
| 7921713 | -0,31 | -1,24 | 0,46216 | 4,25  | 19,03 | 0,00002 | NM_016946         | OR6M1        |
| 7952375 | -0,31 | -1,24 | 0,22460 | -1,53 | -2,89 | 0,01410 | NM_001005325      | C1QTNF3      |
| 8111443 | -0,31 | -1,24 | 0,37816 | 1,18  | 2,27  | 0,01411 | NM_181435         | B3GALT5      |
| 8068633 | -0,31 | -1,24 | 0,31584 | -0,56 | -1,48 | 0,03987 | NM_033171         | ---          |
| 8053751 | -0,31 | -1,24 | 0,34221 | -1,11 | -2,16 | 0,06083 | ---               | ---          |
| 8161405 | -0,31 | -1,24 | 0,34221 | -1,11 | -2,16 | 0,06083 | ---               | MIR136       |
| 7976806 | -0,31 | -1,24 | 0,43455 | -0,60 | -1,51 | 0,06783 | NR_029699         | LRRC66       |
| 8100312 | -0,31 | -1,24 | 0,24865 | -0,72 | -1,64 | 0,00972 | NM_001024611      | ---          |
| 8111358 | -0,31 | -1,24 | 0,05578 | -1,26 | -2,39 | 0,01892 | ---               | WDR73        |
| 7991126 | -0,31 | -1,24 | 0,51784 | 0,83  | 1,78  | 0,11858 | NM_032856         | ZNF80        |
| 8089694 | -0,31 | -1,24 | 0,25766 | -0,85 | -1,80 | 0,07670 | NM_007136         | IFITM5       |
| 7945368 | -0,31 | -1,24 | 0,61854 | -0,89 | -1,85 | 0,00261 | NM_001025295      | LOC154872    |
| 8142692 | -0,31 | -1,24 | 0,45388 | -1,25 | -2,39 | 0,00281 | BC130604 C9orf135 |              |
| 8155747 | -0,31 | -1,24 | 0,28632 | -1,55 | -2,92 | 0,00145 | NM_001010940      | PLEC         |
| 8153568 | -0,31 | -1,24 | 0,06772 | 0,02  | 1,01  | 0,96770 | NM_201384         | SNORD115-2   |
| 7982010 | -0,31 | -1,24 | 0,04991 | -0,59 | -1,50 | 0,01272 | NR_003294         | KREMEN1      |
| 8072170 | -0,31 | -1,24 | 0,09943 | 1,34  | 2,54  | 0,01472 | NM_032045         | FMO5         |
| 7919314 | -0,31 | -1,24 | 0,16416 | 0,53  | 1,45  | 0,03650 | NM_001461         | KY           |
| 8090872 | -0,31 | -1,24 | 0,43931 | -0,63 | -1,55 | 0,07250 | NM_178554         | CYB5RL       |
| 7916393 | -0,31 | -1,24 | 0,11152 | -0,53 | -1,44 | 0,38894 | NM_001031672      | ---          |
| 8009792 | -0,31 | -1,24 | 0,24647 | -0,84 | -1,79 | 0,13619 | ---               | CCDC130      |
| 8026170 | -0,31 | -1,24 | 0,30077 | 1,47  | 2,77  | 0,02021 | NM_030818         | SNORD26      |
| 7948908 | -0,31 | -1,24 | 0,04743 | 0,23  | 1,17  | 0,07378 | NR_002564         | AG2          |
| 7939492 | -0,31 | -1,24 | 0,35594 | -1,57 | -2,96 | 0,00262 | NM_001145033      | URGCP        |
| 8139256 | -0,31 | -1,24 | 0,09500 | 2,12  | 4,36  | 0,02032 | NM_017920         | C3orf51      |
| 8088212 | -0,31 | -1,24 | 0,37165 | -1,04 | -2,05 | 0,09003 | NR_024615         | HIST1H3G     |
| 8124440 | -0,31 | -1,24 | 0,05271 | 0,19  | 1,14  | 0,66291 | NM_003534         | ENTPD1       |
| 7929511 | -0,31 | -1,24 | 0,09914 | -1,68 | -3,21 | 0,02432 | NM_001776         | PRMT2        |
| 8069450 | -0,31 | -1,24 | 0,64185 | 0,66  | 1,58  | 0,00921 | NM_206962         | CD160        |
| 7919243 | -0,31 | -1,24 | 0,28494 | -0,93 | -1,91 | 0,06235 | NM_007053         | GOLPH3       |
| 8111331 | -0,31 | -1,24 | 0,42435 | 0,87  | 1,83  | 0,00720 | NM_022130         | DEFB126      |
| 8060308 | -0,31 | -1,24 | 0,35952 | -0,94 | -1,91 | 0,00140 | NM_030931         | ---          |
| 8053664 | -0,31 | -1,24 | 0,27659 | -1,49 | -2,81 | 0,00267 | ---               | TRPC3        |
| 8102678 | -0,31 | -1,24 | 0,50165 | -1,21 | -2,32 | 0,02361 | NM_001130698      | CYSLTR1      |
| 8173745 | -0,31 | -1,24 | 0,63601 | -0,49 | -1,40 | 0,03318 | NM_006639         | LOC100129884 |
| 7971965 | -0,32 | -1,24 | 0,41237 | -0,31 | -1,24 | 0,15558 | AK097079          | ---          |
| 8118319 | -0,32 | -1,24 | 0,21992 | 0,45  | 1,36  | 0,06952 | ---               | PTTG3P       |
| 8151123 | -0,32 | -1,24 | 0,02321 | -0,25 | -1,19 | 0,21725 | NR_002734         | CEP152       |
| 7988537 | -0,32 | -1,24 | 0,28486 | 1,52  | 2,87  | 0,03605 | NM_014985         | LOC646513    |
| 8072353 | -0,32 | -1,24 | 0,30405 | -0,59 | -1,50 | 0,00070 | AY358802 ARL4D    |              |
| 8007493 | -0,32 | -1,24 | 0,29561 | 0,38  | 1,30  | 0,37311 | NM_001661         | HOXA3        |
| 8138721 | -0,32 | -1,24 | 0,49812 | 0,69  | 1,62  | 0,02166 | NM_153631         | LY75         |
| 8056113 | -0,32 | -1,25 | 0,12827 | -1,19 | -2,28 | 0,00102 | NM_002349         | ---          |
| 8097028 | -0,32 | -1,25 | 0,49711 | -0,99 | -1,98 | 0,01233 | ---               | SYT7         |
| 7948588 | -0,32 | -1,25 | 0,03574 | 0,75  | 1,68  | 0,06831 | NM_004200         | CD1D         |
| 7906330 | -0,32 | -1,25 | 0,39568 | -0,71 | -1,64 | 0,00026 | NM_001766         | FAM72D       |
| 7919591 | -0,32 | -1,25 | 0,71316 | 2,97  | 7,81  | 0,00067 | AB096683 DSPP     |              |
| 8096265 | -0,32 | -1,25 | 0,09936 | -0,63 | -1,54 | 0,02585 | NM_014208         | ZNF432       |
| 8038942 | -0,32 | -1,25 | 0,22018 | -0,15 | -1,11 | 0,20424 | NM_014650         | GLIPR1L1     |
| 7957245 | -0,32 | -1,25 | 0,09158 | -0,36 | -1,29 | 0,05014 | NM_152779         | MIR19B2      |
| 8175250 | -0,32 | -1,25 | 0,04227 | -0,51 | -1,43 | 0,11535 | NR_029491         | RBM14        |
| 7941707 | -0,32 | -1,25 | 0,09778 | -0,58 | -1,49 | 0,32771 | NM_006328         | TRIOBP       |
| 8072894 | -0,32 | -1,25 | 0,12930 | 0,63  | 1,54  | 0,09815 | NM_001039141      | SYT14L       |
| 8100699 | -0,32 | -1,25 | 0,11699 | -1,07 | -2,10 | 0,01889 | NR_027094         | LUZP2        |
| 7939007 | -0,32 | -1,25 | 0,26602 | -0,99 | -1,99 | 0,01198 | NM_001009909      | GOLGA6L5     |

|                                     |       |       |         |       |       |         |                           |                            |
|-------------------------------------|-------|-------|---------|-------|-------|---------|---------------------------|----------------------------|
| 7985472                             | -0,32 | -1,25 | 0,70584 | -0,13 | -1,09 | 0,71770 | NR_003246                 | C14orf143                  |
| 7980690                             | -0,32 | -1,25 | 0,04469 | -0,08 | -1,06 | 0,74336 | NM_145231                 | ---                        |
| 8094499                             | -0,32 | -1,25 | 0,41559 | -0,87 | -1,83 | 0,12507 | ---                       | ---                        |
| 8056570                             | -0,32 | -1,25 | 0,52846 | -0,98 | -1,97 | 0,00159 | ---                       | ---                        |
| 8167893                             | -0,32 | -1,25 | 0,70413 | -1,60 | -3,02 | 0,00129 | ---                       | DVL2                       |
| 8012079                             | -0,32 | -1,25 | 0,13626 | 1,12  | 2,18  | 0,01534 | NM_004422                 | C11orf65                   |
| 7951521                             | -0,32 | -1,25 | 0,07653 | -0,95 | -1,93 | 0,04274 | NM_152587                 | ---                        |
| 7966266                             | -0,32 | -1,25 | 0,46846 | -1,36 | -2,57 | 0,01779 | ---                       | ---                        |
| 8079375                             | -0,32 | -1,25 | 0,32677 | -1,01 | -2,01 | 0,01630 | ---                       | PIWIL2                     |
| 8145097                             | -0,32 | -1,25 | 0,10425 | -0,62 | -1,54 | 0,00700 | NM_018068                 | ITK                        |
| 8109507                             | -0,32 | -1,25 | 0,25355 | -1,09 | -2,13 | 0,00900 | NM_005546                 | CUL9                       |
| 8119722                             | -0,32 | -1,25 | 0,10129 | 1,53  | 2,89  | 0,00364 | NM_015089                 | ---                        |
| 8017104                             | -0,32 | -1,25 | 0,03363 | -0,06 | -1,05 | 0,78445 | ---                       | LOC643763                  |
| 8146633                             | -0,32 | -1,25 | 0,44307 | -1,72 | -3,29 | 0,00569 | NR_027378                 | ---                        |
| 8139885                             | -0,32 | -1,25 | 0,22966 | -1,22 | -2,34 | 0,00937 | ---                       | ---                        |
| 8015739                             | -0,32 | -1,25 | 0,07767 | -0,20 | -1,15 | 0,18967 | ---                       | DNAH14                     |
| 7910047                             | -0,32 | -1,25 | 0,67811 | 1,37  | 2,58  | 0,11828 | NM_001373                 | ---                        |
| 7932725                             | -0,32 | -1,25 | 0,30776 | -0,53 | -1,44 | 0,03510 | ---                       | PTTG2                      |
| 8094596                             | -0,32 | -1,25 | 0,25362 | -0,80 | -1,74 | 0,09129 | NM_006607                 | LTB4R                      |
| 7973702                             | -0,32 | -1,25 | 0,29003 | 0,04  | 1,03  | 0,78927 | NM_001143919              | PALMD                      |
| 7903227                             | -0,32 | -1,25 | 0,31102 | -1,69 | -3,22 | 0,03626 | NM_017734                 | TMED1                      |
| 8034101                             | -0,32 | -1,25 | 0,52661 | -0,92 | -1,90 | 0,05392 | NM_006858                 | RAB1C                      |
| 8161238                             | -0,32 | -1,25 | 0,43206 | 1,79  | 3,46  | 0,00974 | U66622                    | TAF1L // TAF1L // TAF1L // |
| TAF1L // TAF1L                      |       |       |         |       |       |         |                           |                            |
| 8160597                             | -0,32 | -1,25 | 0,42703 | -0,59 | -1,50 | 0,34284 | NM_153809 // NM_153809 // |                            |
| NM_153809 // NM_153809 // NM_153809 |       |       |         |       |       |         |                           |                            |
| 7949717                             | -0,32 | -1,25 | 0,28673 | -0,97 | -1,96 | 0,06908 | ---                       | FGFR2                      |
| 7936734                             | -0,32 | -1,25 | 0,21614 | -0,07 | -1,05 | 0,52455 | NM_000141                 | ---                        |
| 8144699                             | -0,32 | -1,25 | 0,54459 | -1,14 | -2,21 | 0,00107 | ---                       | NPFRR2                     |
| 8095616                             | -0,32 | -1,25 | 0,26532 | -0,50 | -1,41 | 0,01462 | NM_004885                 | ARGLU1                     |
| 7972723                             | -0,32 | -1,25 | 0,09475 | 0,83  | 1,77  | 0,02815 | NM_018011                 | ---                        |
| 8116904                             | -0,32 | -1,25 | 0,51708 | -0,77 | -1,71 | 0,00610 | ---                       | IL10                       |
| 7923907                             | -0,32 | -1,25 | 0,43646 | -1,21 | -2,32 | 0,00598 | NM_000572                 | C8orf22                    |
| 8146393                             | -0,32 | -1,25 | 0,26411 | -0,34 | -1,26 | 0,04672 | NM_001007176              | JSRP1                      |
| 8032465                             | -0,32 | -1,25 | 0,41750 | -1,08 | -2,11 | 0,04589 | NM_144616                 | C9orf82                    |
| 8160478                             | -0,32 | -1,25 | 0,20510 | -0,06 | -1,04 | 0,71509 | NM_024828                 | TMEM186                    |
| 7999317                             | -0,32 | -1,25 | 0,46089 | 0,33  | 1,26  | 0,38393 | NM_015421                 | C17orf79                   |
| 8014073                             | -0,32 | -1,25 | 0,13797 | -1,23 | -2,34 | 0,10087 | NM_018405                 | MIR200B                    |
| 7896859                             | -0,32 | -1,25 | 0,15602 | -0,31 | -1,24 | 0,39998 | NR_029639                 | KLF9                       |
| 8161648                             | -0,32 | -1,25 | 0,36248 | -1,36 | -2,56 | 0,00278 | NM_001206                 | ---                        |
| 7937890                             | -0,32 | -1,25 | 0,59102 | -1,08 | -2,12 | 0,05920 | ---                       | SFRS14                     |
| 8035581                             | -0,32 | -1,25 | 0,20786 | 0,85  | 1,80  | 0,02397 | NM_001017392              | OR14A16                    |
| 7925735                             | -0,32 | -1,25 | 0,20773 | -1,46 | -2,75 | 0,03796 | NM_001001966              | RAB26                      |
| 7992518                             | -0,32 | -1,25 | 0,24301 | 2,23  | 4,69  | 0,00451 | NM_014353                 | PATE2                      |
| 7952517                             | -0,32 | -1,25 | 0,55362 | -0,45 | -1,37 | 0,10015 | NM_212555                 | ISLR2                      |
| 7984802                             | -0,32 | -1,25 | 0,54814 | -1,54 | -2,91 | 0,00049 | NM_001130136              | RND1                       |
| 7962884                             | -0,32 | -1,25 | 0,44896 | 0,42  | 1,34  | 0,15184 | NM_014470                 | MTHFR                      |
| 7912496                             | -0,32 | -1,25 | 0,27531 | 0,64  | 1,56  | 0,14923 | NM_005957                 | TMEM40                     |
| 8085393                             | -0,32 | -1,25 | 0,21246 | 0,19  | 1,14  | 0,44448 | NM_018306                 | C1orf83                    |
| 7901592                             | -0,32 | -1,25 | 0,41551 | 0,91  | 1,88  | 0,00774 | BC035374                  | TREX2                      |
| 8175808                             | -0,32 | -1,25 | 0,52132 | -0,90 | -1,86 | 0,34099 | NM_080701                 | GPR19                      |
| 7961381                             | -0,32 | -1,25 | 0,17054 | -0,28 | -1,21 | 0,42215 | NM_006143                 | ---                        |
| 8023380                             | -0,32 | -1,25 | 0,51519 | -0,47 | -1,38 | 0,12915 | ---                       | TAP2                       |
| 8180034                             | -0,32 | -1,25 | 0,05168 | 1,17  | 2,26  | 0,03214 | NM_000544                 | MIR218-1                   |
| 8094340                             | -0,32 | -1,25 | 0,50118 | -1,48 | -2,79 | 0,10097 | NR_029631                 | ---                        |
| 8114812                             | -0,32 | -1,25 | 0,25110 | -0,98 | -1,98 | 0,11403 | ---                       | C16orf82                   |
| 7994267                             | -0,32 | -1,25 | 0,57768 | -1,50 | -2,82 | 0,00242 | NM_001145545              | PTTG1 // PTTG1             |
| 8109639                             | -0,32 | -1,25 | 0,35956 | 0,64  | 1,56  | 0,28077 | NM_004219 // NM_004219    | DBC1                       |
| 8163716                             | -0,32 | -1,25 | 0,41723 | -1,13 | -2,19 | 0,00337 | NM_014618                 | FAIM                       |
| 8083000                             | -0,32 | -1,25 | 0,47908 | 0,20  | 1,15  | 0,62396 | NM_001033030              | ZNF45                      |
| 8037433                             | -0,32 | -1,25 | 0,28601 | 0,58  | 1,49  | 0,27148 | NM_003425                 | SNORD35A                   |
| 8030366                             | -0,32 | -1,25 | 0,22366 | 1,05  | 2,06  | 0,03619 | NR_000018                 | DAZL                       |
| 8085676                             | -0,32 | -1,25 | 0,21933 | -1,02 | -2,02 | 0,00115 | NM_001351                 | HTRA2                      |
| 8042905                             | -0,32 | -1,25 | 0,42635 | 0,27  | 1,21  | 0,47901 | NM_013247                 | CCDC148                    |
| 8045857                             | -0,32 | -1,25 | 0,46602 | -1,10 | -2,14 | 0,17169 | NM_138803                 | ZNF29P                     |
| 8005106                             | -0,32 | -1,25 | 0,13910 | -0,40 | -1,32 | 0,01630 | X52357                    | ENGASE                     |
| 8010295                             | -0,32 | -1,25 | 0,30408 | 0,02  | 1,02  | 0,94149 | NM_001042573              | SDAD1                      |
| 8095802                             | -0,32 | -1,25 | 0,05865 | -0,65 | -1,57 | 0,17774 | NM_018115                 | C6orf58                    |
| 8121936                             | -0,32 | -1,25 | 0,19735 | -1,00 | -2,00 | 0,01709 | AK303850                  | UNC5B                      |
| 7928189                             | -0,32 | -1,25 | 0,47884 | -0,20 | -1,15 | 0,40979 | NM_170744                 | ---                        |
| 8103242                             | -0,32 | -1,25 | 0,37186 | -1,24 | -2,36 | 0,00723 | ---                       | ZNF333                     |
| 8026365                             | -0,32 | -1,25 | 0,18574 | -0,15 | -1,11 | 0,82632 | NM_032433                 | SLC34A1                    |
| 8110347                             | -0,32 | -1,25 | 0,59030 | -0,71 | -1,63 | 0,06368 | NM_003052                 | OR10C1                     |



|         |       |       |         |       |       |         |              |              |
|---------|-------|-------|---------|-------|-------|---------|--------------|--------------|
| 8117727 | -0,33 | -1,25 | 0,56722 | -0,82 | -1,77 | 0,01042 | NM_013941    | OR6C4        |
| 7956003 | -0,33 | -1,25 | 0,52267 | -0,39 | -1,31 | 0,03209 | NM_001005494 | OR12D3       |
| 8178289 | -0,33 | -1,25 | 0,31417 | -0,73 | -1,65 | 0,00147 | NM_030959    | ---          |
| 8154979 | -0,33 | -1,25 | 0,62137 | -0,66 | -1,58 | 0,06313 | ---          | ---          |
| 7933178 | -0,33 | -1,25 | 0,76114 | -2,31 | -4,95 | 0,00546 | ---          | ARHGEF1      |
| 8029147 | -0,33 | -1,25 | 0,57248 | -0,03 | -1,02 | 0,91330 | NM_199002    | DNMT3A       |
| 8050813 | -0,33 | -1,25 | 0,21193 | -0,20 | -1,15 | 0,09843 | NM_175629    | OR2M5        |
| 7911263 | -0,33 | -1,25 | 0,61944 | -1,00 | -2,00 | 0,08294 | NM_001004690 | KRTAP5-10    |
| 7942267 | -0,33 | -1,25 | 0,15244 | -0,29 | -1,23 | 0,69557 | NM_001012710 | C8orf31      |
| 8148580 | -0,33 | -1,25 | 0,45730 | 0,67  | 1,59  | 0,03319 | BC073830     | FAM54A       |
| 8129763 | -0,33 | -1,25 | 0,22834 | 1,04  | 2,06  | 0,02416 | NM_001099286 | IFNA10       |
| 8160389 | -0,33 | -1,25 | 0,27617 | -1,06 | -2,08 | 0,05858 | NM_002171    | SNORD115-1   |
| 7982008 | -0,33 | -1,25 | 0,61331 | -1,94 | -3,85 | 0,00001 | NR_001291    | SNORD115-1   |
| 7982032 | -0,33 | -1,25 | 0,61331 | -1,94 | -3,85 | 0,00001 | NR_001291    | SNORD115-1   |
| 7982038 | -0,33 | -1,25 | 0,61331 | -1,94 | -3,85 | 0,00001 | NR_001291    | ---          |
| 8102743 | -0,33 | -1,25 | 0,39243 | 0,16  | 1,11  | 0,55294 | ---          | VNN2         |
| 8129637 | -0,33 | -1,25 | 0,17713 | -1,24 | -2,36 | 0,00326 | NM_004665    | LOC401387    |
| 8140869 | -0,33 | -1,25 | 0,39010 | -1,23 | -2,35 | 0,03013 | NM_001161528 | C21orf99     |
| 8067825 | -0,33 | -1,25 | 0,67342 | -1,90 | -3,73 | 0,00010 | NR_026916    | ---          |
| 8113717 | -0,33 | -1,25 | 0,25656 | -0,47 | -1,38 | 0,27436 | ---          | C19orf25     |
| 8032224 | -0,33 | -1,25 | 0,37906 | -0,33 | -1,26 | 0,13531 | NM_152482    | PRRG3        |
| 8170507 | -0,33 | -1,25 | 0,20011 | -0,82 | -1,77 | 0,11975 | NR_033262    | ---          |
| 8096079 | -0,33 | -1,25 | 0,52378 | -1,22 | -2,34 | 0,06052 | ---          | ZNF596       |
| 8144230 | -0,33 | -1,25 | 0,36869 | -0,38 | -1,30 | 0,11728 | NM_001042416 | AQP1         |
| 8132118 | -0,33 | -1,25 | 0,44345 | -0,20 | -1,15 | 0,56597 | NM_198098    | ---          |
| 8043900 | -0,33 | -1,26 | 0,13631 | -0,25 | -1,19 | 0,34399 | ---          | C9orf103     |
| 8156116 | -0,33 | -1,26 | 0,37214 | 0,94  | 1,91  | 0,00215 | NM_001001551 | GTPBP3       |
| 8026735 | -0,33 | -1,26 | 0,42635 | 0,66  | 1,57  | 0,20888 | NM_133644    | OR1A2        |
| 8003802 | -0,33 | -1,26 | 0,57916 | -1,96 | -3,89 | 0,04750 | NM_012352    | GIPC3        |
| 8024676 | -0,33 | -1,26 | 0,16451 | 0,00  | -1,00 | 0,98766 | NM_133261    | ---          |
| 8141138 | -0,33 | -1,26 | 0,26423 | -0,79 | -1,73 | 0,01490 | ---          | ATG2A        |
| 7949277 | -0,33 | -1,26 | 0,29931 | 1,67  | 3,19  | 0,03380 | NM_015104    | CCDC36       |
| 8079719 | -0,33 | -1,26 | 0,54616 | -0,96 | -1,94 | 0,03355 | NM_178173    | FAM38A       |
| 8003357 | -0,33 | -1,26 | 0,02065 | 2,35  | 5,09  | 0,00321 | NM_001142864 | RASGRP3      |
| 8041422 | -0,33 | -1,26 | 0,39937 | -0,67 | -1,59 | 0,08108 | NM_170672    | TRIM45       |
| 7918925 | -0,33 | -1,26 | 0,43944 | 0,12  | 1,09  | 0,69803 | NM_025188    | TMEM180      |
| 7930106 | -0,33 | -1,26 | 0,30599 | 1,96  | 3,89  | 0,00603 | NM_024789    | RBM15        |
| 7903878 | -0,33 | -1,26 | 0,04038 | 0,35  | 1,27  | 0,18240 | NM_022768    | SERHL        |
| 8073585 | -0,33 | -1,26 | 0,19853 | -0,34 | -1,26 | 0,35771 | NR_027786    | LOC388692    |
| 7905043 | -0,33 | -1,26 | 0,51225 | -0,84 | -1,79 | 0,14676 | NR_027002    | ZNF550       |
| 8039655 | -0,33 | -1,26 | 0,23779 | 0,15  | 1,11  | 0,46944 | NM_001039654 | ---          |
| 8113427 | -0,33 | -1,26 | 0,25825 | -1,44 | -2,71 | 0,00286 | ---          | MGRN1        |
| 7992998 | -0,33 | -1,26 | 0,20575 | -0,18 | -1,14 | 0,51336 | NM_001142290 | ---          |
| 7916775 | -0,33 | -1,26 | 0,28435 | -0,60 | -1,51 | 0,16148 | ---          | RAPGEF4      |
| 8046428 | -0,33 | -1,26 | 0,15011 | 0,54  | 1,45  | 0,09901 | NM_007023    | RAD52        |
| 7960261 | -0,33 | -1,26 | 0,39522 | 0,52  | 1,44  | 0,02892 | NM_134424    | SBNO2        |
| 8032157 | -0,33 | -1,26 | 0,27562 | 1,18  | 2,26  | 0,11639 | NM_014963    | GPR157       |
| 7912239 | -0,33 | -1,26 | 0,48874 | -0,02 | -1,01 | 0,96007 | NM_024980    | VPS18        |
| 7982845 | -0,33 | -1,26 | 0,42302 | 0,78  | 1,71  | 0,23937 | NM_020857    | NUDT13       |
| 7928342 | -0,33 | -1,26 | 0,52447 | -0,17 | -1,12 | 0,64332 | NM_015901    | MLL4         |
| 8027956 | -0,33 | -1,26 | 0,07116 | 0,77  | 1,71  | 0,21569 | NM_014727    | ALX1         |
| 7957452 | -0,33 | -1,26 | 0,22635 | 0,26  | 1,20  | 0,57195 | NM_006982    | SDHC         |
| 7906746 | -0,33 | -1,26 | 0,69816 | 1,56  | 2,95  | 0,01928 | NM_003001    | OR10C1       |
| 8177704 | -0,33 | -1,26 | 0,52426 | -0,77 | -1,70 | 0,01978 | NM_013941    | OR10C1       |
| 8179007 | -0,33 | -1,26 | 0,52426 | -0,77 | -1,70 | 0,01978 | NM_013941    | ATP8A2       |
| 7968154 | -0,33 | -1,26 | 0,07497 | -0,09 | -1,06 | 0,73790 | NM_016529    | MAGEB16      |
| 8166669 | -0,33 | -1,26 | 0,20350 | -1,81 | -3,51 | 0,00331 | NM_001099921 | CDC25C       |
| 8114425 | -0,33 | -1,26 | 0,06058 | 1,71  | 3,28  | 0,00000 | NM_001790    | COCH         |
| 7973797 | -0,33 | -1,26 | 0,62663 | 3,31  | 9,92  | 0,00000 | NM_001135058 | PIN1         |
| 8025506 | -0,33 | -1,26 | 0,45047 | 1,01  | 2,02  | 0,16660 | NM_006221    | LOC100130713 |
| 8036936 | -0,33 | -1,26 | 0,58845 | 0,02  | 1,01  | 0,96156 | AK096566     | ---          |
| 8041711 | -0,33 | -1,26 | 0,41698 | -0,52 | -1,44 | 0,01644 | ---          | MRGPRX3      |
| 7938741 | -0,33 | -1,26 | 0,35745 | -1,44 | -2,71 | 0,04119 | NM_054031    | SDS          |
| 7966621 | -0,33 | -1,26 | 0,13658 | -0,53 | -1,45 | 0,02692 | NM_006843    | DLL1         |
| 8130939 | -0,33 | -1,26 | 0,30525 | 0,01  | 1,00  | 0,97932 | NM_005618    | GGA1         |
| 8072825 | -0,33 | -1,26 | 0,16035 | 1,46  | 2,75  | 0,01753 | NM_013365    | C7orf46      |
| 8131881 | -0,33 | -1,26 | 0,12699 | 3,03  | 8,18  | 0,00265 | NM_199136    | ---          |
| 7963588 | -0,33 | -1,26 | 0,04313 | -0,56 | -1,47 | 0,00146 | ---          | RINT1        |
| 8142079 | -0,33 | -1,26 | 0,06024 | -0,72 | -1,65 | 0,04488 | NM_021930    | FABP5        |
| 7948420 | -0,33 | -1,26 | 0,31720 | 1,52  | 2,87  | 0,00033 | NM_001444    | PECAM1       |
| 8017599 | -0,33 | -1,26 | 0,18863 | -0,70 | -1,63 | 0,04335 | NM_000442    | ---          |
| 7926539 | -0,33 | -1,26 | 0,27382 | -1,63 | -3,10 | 0,01874 | ---          | LOC360030    |
| 7953670 | -0,33 | -1,26 | 0,29086 | -0,83 | -1,78 | 0,01989 | NM_001145465 | ZNF879       |

|         |       |       |         |       |       |         |              |           |
|---------|-------|-------|---------|-------|-------|---------|--------------|-----------|
| 8110486 | -0,33 | -1,26 | 0,19424 | -0,12 | -1,09 | 0,58852 | NM_001136116 | ---       |
| 8121062 | -0,33 | -1,26 | 0,12901 | -1,50 | -2,83 | 0,00897 | ---          | TRIM62    |
| 7914630 | -0,33 | -1,26 | 0,11048 | 0,80  | 1,74  | 0,06934 | NM_018207    | RHCG      |
| 7991283 | -0,33 | -1,26 | 0,28866 | 0,34  | 1,27  | 0,28622 | NM_016321    | OR12D3    |
| 8124645 | -0,33 | -1,26 | 0,25465 | -0,58 | -1,49 | 0,01044 | NM_030959    | ---       |
| 7974337 | -0,33 | -1,26 | 0,20334 | -0,87 | -1,83 | 0,00986 | ---          | IFLTD1    |
| 7961875 | -0,33 | -1,26 | 0,14799 | -0,84 | -1,79 | 0,03689 | NM_001145728 | ---       |
| 7994343 | -0,33 | -1,26 | 0,34832 | -0,47 | -1,39 | 0,20400 | ---          | CAPN13    |
| 8051275 | -0,33 | -1,26 | 0,22959 | -1,27 | -2,41 | 0,00663 | NM_144575    | KRT71     |
| 7963438 | -0,33 | -1,26 | 0,22895 | -0,51 | -1,43 | 0,01647 | NM_033448    | NAALAD2   |
| 7943051 | -0,33 | -1,26 | 0,14064 | -0,73 | -1,65 | 0,03650 | NM_005467    | RNF144B   |
| 8117106 | -0,33 | -1,26 | 0,30067 | 1,72  | 3,30  | 0,00084 | NM_182757    | COX19     |
| 8137693 | -0,33 | -1,26 | 0,25648 | 0,08  | 1,06  | 0,31278 | NM_001031617 | C1orf105  |
| 7907396 | -0,33 | -1,26 | 0,20795 | -0,82 | -1,77 | 0,01017 | NM_139240    | GCOM1     |
| 7983890 | -0,33 | -1,26 | 0,17891 | -0,91 | -1,87 | 0,06267 | NM_001018100 | OR52M1    |
| 7937944 | -0,33 | -1,26 | 0,40352 | -1,15 | -2,22 | 0,02777 | NM_001004137 | AURKC     |
| 8031700 | -0,33 | -1,26 | 0,38880 | -0,64 | -1,56 | 0,13007 | NM_001015878 | TNFSF18   |
| 7922337 | -0,33 | -1,26 | 0,37602 | -0,97 | -1,95 | 0,00056 | NM_005092    | KIF27     |
| 8156164 | -0,33 | -1,26 | 0,60254 | 2,44  | 5,41  | 0,00197 | NM_017576    | C10orf4   |
| 7935123 | -0,33 | -1,26 | 0,10120 | -0,58 | -1,49 | 0,02373 | NM_145246    | ---       |
| 8128314 | -0,33 | -1,26 | 0,17213 | -1,45 | -2,73 | 0,01719 | ---          | SNIP1     |
| 7915008 | -0,33 | -1,26 | 0,15204 | 0,34  | 1,27  | 0,10873 | NM_024700    | HAPLN1    |
| 8112971 | -0,33 | -1,26 | 0,02590 | -0,65 | -1,57 | 0,00068 | NM_001884    | P2RX1     |
| 8011499 | -0,34 | -1,26 | 0,19914 | -1,07 | -2,10 | 0,02145 | NM_002558    | ---       |
| 8141148 | -0,34 | -1,26 | 0,33513 | -1,03 | -2,04 | 0,01623 | ---          | PCDP1     |
| 8044818 | -0,34 | -1,26 | 0,11936 | -0,49 | -1,41 | 0,05898 | NM_001029996 | OR2M4     |
| 7911269 | -0,34 | -1,26 | 0,51308 | -1,48 | -2,79 | 0,00287 | NM_017504    | ANKRD34A  |
| 7904737 | -0,34 | -1,26 | 0,44546 | -0,93 | -1,90 | 0,10909 | NM_001039888 | KIAA1671  |
| 8071981 | -0,34 | -1,26 | 0,47065 | 0,50  | 1,41  | 0,48739 | NM_001145206 | GPR77     |
| 8029914 | -0,34 | -1,26 | 0,05604 | -1,04 | -2,06 | 0,01422 | NM_018485    | APOA4     |
| 7951859 | -0,34 | -1,26 | 0,13830 | -0,75 | -1,68 | 0,00272 | NM_000482    | L3MBTL4   |
| 8022145 | -0,34 | -1,26 | 0,27932 | -0,64 | -1,56 | 0,04812 | NM_173464    | MYBPC1    |
| 7957966 | -0,34 | -1,26 | 0,45342 | -1,45 | -2,74 | 0,00282 | NM_002465    | ---       |
| 8099253 | -0,34 | -1,26 | 0,30979 | -1,43 | -2,69 | 0,00832 | ---          | MIR31     |
| 8160439 | -0,34 | -1,26 | 0,64554 | -0,61 | -1,53 | 0,33479 | NR_029505    | C5orf36   |
| 8113113 | -0,34 | -1,26 | 0,18693 | -0,21 | -1,16 | 0,30982 | NM_173665    | CDK5RAP1  |
| 8065668 | -0,34 | -1,26 | 0,40789 | 0,73  | 1,66  | 0,08135 | NM_016408    | ---       |
| 8163381 | -0,34 | -1,26 | 0,48752 | -1,21 | -2,31 | 0,02214 | ---          | B3GALTL   |
| 7968370 | -0,34 | -1,26 | 0,01213 | 2,03  | 4,08  | 0,00002 | NM_194318    | ---       |
| 8066212 | -0,34 | -1,26 | 0,14946 | -0,82 | -1,76 | 0,05315 | ---          | ZPLD1     |
| 8081407 | -0,34 | -1,26 | 0,39368 | -1,15 | -2,21 | 0,01799 | NM_175056    | BCORL1    |
| 8169882 | -0,34 | -1,26 | 0,26786 | 1,07  | 2,10  | 0,00266 | NM_021946    | TXNDC8    |
| 8163193 | -0,34 | -1,26 | 0,21692 | -0,54 | -1,46 | 0,01194 | NM_001003936 | ---       |
| 7935359 | -0,34 | -1,26 | 0,09718 | -1,04 | -2,06 | 0,06929 | ---          | ANKH      |
| 8104590 | -0,34 | -1,26 | 0,39885 | 1,87  | 3,67  | 0,00587 | NM_054027    | SETD6     |
| 7996241 | -0,34 | -1,26 | 0,15556 | 1,27  | 2,41  | 0,02074 | NM_001160305 | ---       |
| 8059876 | -0,34 | -1,26 | 0,23903 | -1,16 | -2,23 | 0,00156 | ---          | LOC151009 |
| 8054517 | -0,34 | -1,26 | 0,60768 | 3,38  | 10,42 | 0,00001 | AK095678     | TBRG4     |
| 8139468 | -0,34 | -1,26 | 0,43822 | 1,21  | 2,32  | 0,00634 | NM_004749    | ST8SIA2   |
| 7986229 | -0,34 | -1,26 | 0,42533 | -1,15 | -2,22 | 0,00010 | NM_006011    | ---       |
| 8052123 | -0,34 | -1,26 | 0,42814 | -0,25 | -1,19 | 0,28804 | ---          | VTI1A     |
| 7930524 | -0,34 | -1,26 | 0,43107 | 1,09  | 2,12  | 0,08771 | NM_145206    | PSCA      |
| 8148548 | -0,34 | -1,26 | 0,40770 | -0,33 | -1,26 | 0,13721 | NM_005672    | ---       |
| 7925087 | -0,34 | -1,26 | 0,03825 | -0,67 | -1,59 | 0,03015 | ---          | HCN3      |
| 7905974 | -0,34 | -1,26 | 0,33831 | 1,02  | 2,03  | 0,04057 | NM_020897    | HOXC10    |
| 7955858 | -0,34 | -1,26 | 0,30488 | 0,62  | 1,54  | 0,20052 | NM_017409    | SPDYE3    |
| 8134785 | -0,34 | -1,26 | 0,57832 | -1,10 | -2,14 | 0,05584 | NM_001004351 | FLJ37543  |
| 8105517 | -0,34 | -1,26 | 0,18161 | -0,80 | -1,74 | 0,01591 | NM_173667    | TMEM232   |
| 8113483 | -0,34 | -1,26 | 0,34466 | -0,62 | -1,54 | 0,17164 | NM_001039763 | CAMK4     |
| 8107307 | -0,34 | -1,26 | 0,54718 | -1,16 | -2,24 | 0,00007 | NM_001744    | HSPB2     |
| 7943787 | -0,34 | -1,27 | 0,40258 | -1,06 | -2,08 | 0,01584 | NM_001541    | TSFM      |
| 7956639 | -0,34 | -1,27 | 0,58532 | 2,86  | 7,25  | 0,00393 | NM_001172696 | NSUN5P2   |
| 8133633 | -0,34 | -1,27 | 0,37940 | 0,59  | 1,50  | 0,16965 | NR_033323    | ADCY10    |
| 7922058 | -0,34 | -1,27 | 0,06344 | -0,66 | -1,59 | 0,07084 | NM_018417    | TUBB1     |
| 8063716 | -0,34 | -1,27 | 0,20537 | -0,76 | -1,70 | 0,03304 | NM_030773    | BHMT      |
| 8106504 | -0,34 | -1,27 | 0,14878 | -1,16 | -2,23 | 0,01930 | NM_001713    | TMEM132C  |
| 7959827 | -0,34 | -1,27 | 0,48003 | -1,58 | -3,00 | 0,00251 | NM_001136103 | ---       |
| 7981215 | -0,34 | -1,27 | 0,60547 | -1,86 | -3,64 | 0,00383 | ---          | IAPP      |
| 7954377 | -0,34 | -1,27 | 0,28753 | -0,56 | -1,47 | 0,19005 | NM_000415    | ---       |
| 7979804 | -0,34 | -1,27 | 0,12705 | -1,03 | -2,05 | 0,02744 | ---          | ---       |
| 8056823 | -0,34 | -1,27 | 0,45922 | -1,21 | -2,31 | 0,11994 | ---          | BEST1     |
| 7940582 | -0,34 | -1,27 | 0,07375 | 1,52  | 2,87  | 0,02775 | NM_004183    | ---       |
| 7987135 | -0,34 | -1,27 | 0,79810 | -1,18 | -2,26 | 0,15569 | ---          | ---       |

|         |       |       |         |       |       |         |                 |           |              |
|---------|-------|-------|---------|-------|-------|---------|-----------------|-----------|--------------|
| 8022506 | -0,34 | -1,27 | 0,40255 | -1,81 | -3,50 | 0,19802 | ---             | SLC35F1   |              |
| 8121712 | -0,34 | -1,27 | 0,65432 | -0,72 | -1,64 | 0,09797 | NM_001029858    |           | LOC389936    |
| 7926117 | -0,34 | -1,27 | 0,45241 | -1,46 | -2,76 | 0,00300 | AK131480        | HAUS6     |              |
| 8132843 | -0,34 | -1,27 | 0,72478 | 1,56  | 2,94  | 0,03764 | NM_017645       |           | FSHB         |
| 7939080 | -0,34 | -1,27 | 0,40486 | -1,03 | -2,04 | 0,01732 | NM_000510       |           | HDAC9        |
| 8131631 | -0,34 | -1,27 | 0,02479 | -1,17 | -2,25 | 0,00213 | NM_178423       |           | EHMT1        |
| 8159702 | -0,34 | -1,27 | 0,22416 | 2,12  | 4,36  | 0,00242 | NM_024757       |           | NOTCH1       |
| 8165217 | -0,34 | -1,27 | 0,47712 | 1,80  | 3,47  | 0,03572 | NM_017617       |           | REG3A        |
| 8053341 | -0,34 | -1,27 | 0,50484 | -1,18 | -2,27 | 0,00651 | NM_138938       |           | RHEBL1       |
| 7963009 | -0,34 | -1,27 | 0,14725 | 1,42  | 2,68  | 0,00935 | NM_144593       |           | C6orf223     |
| 8119918 | -0,34 | -1,27 | 0,30153 | -0,59 | -1,51 | 0,03582 | NM_153246       |           | UCP1         |
| 8102904 | -0,34 | -1,27 | 0,38346 | -0,87 | -1,83 | 0,01655 | NM_021833       |           | RUNDC3B      |
| 8133961 | -0,34 | -1,27 | 0,23158 | -0,05 | -1,04 | 0,89106 | NM_138290       |           | OR10A6       |
| 7946330 | -0,34 | -1,27 | 0,00210 | -0,52 | -1,44 | 0,00185 | NM_001004461    |           | ---          |
| 7929814 | -0,34 | -1,27 | 0,42628 | -1,32 | -2,49 | 0,00020 | ---             | TPD52     |              |
| 8151475 | -0,34 | -1,27 | 0,12130 | 1,70  | 3,24  | 0,00372 | NM_001025252    |           | CLEC7A       |
| 7961120 | -0,34 | -1,27 | 0,14284 | -1,42 | -2,68 | 0,01304 | NM_197947       |           | APOLS        |
| 8072721 | -0,34 | -1,27 | 0,38696 | -1,04 | -2,05 | 0,00547 | NM_030642       |           | ---          |
| 7932508 | -0,34 | -1,27 | 0,05461 | -1,19 | -2,29 | 0,12097 | ---             | C10orf31  |              |
| 7932019 | -0,34 | -1,27 | 0,22532 | -1,03 | -2,04 | 0,00165 | ENST00000379256 |           | C17orf103    |
| 8013509 | -0,34 | -1,27 | 0,29646 | -0,93 | -1,90 | 0,03433 | NM_152914       |           | CASP10       |
| 8047403 | -0,34 | -1,27 | 0,01066 | -0,17 | -1,13 | 0,36263 | NM_032977       |           | EDN1         |
| 8116921 | -0,34 | -1,27 | 0,42738 | 1,02  | 2,03  | 0,06406 | NM_001955       |           | HAUS3        |
| 8098985 | -0,34 | -1,27 | 0,21622 | -0,14 | -1,10 | 0,70652 | NM_024511       |           | RNASE8       |
| 7973156 | -0,34 | -1,27 | 0,53949 | -1,46 | -2,75 | 0,20823 | NM_138331       |           | HELB         |
| 7956894 | -0,34 | -1,27 | 0,16175 | 1,07  | 2,10  | 0,02576 | NM_033647       |           | ---          |
| 8174594 | -0,34 | -1,27 | 0,28143 | -0,63 | -1,54 | 0,02251 | ---             | C20orf152 |              |
| 8062237 | -0,34 | -1,27 | 0,02761 | -0,94 | -1,92 | 0,00048 | BC114945        | ZNF620    |              |
| 8078999 | -0,34 | -1,27 | 0,17388 | 0,77  | 1,71  | 0,03275 | NM_175888       |           | FN3KRP       |
| 8010832 | -0,34 | -1,27 | 0,04565 | 0,99  | 1,99  | 0,03281 | NM_024619       |           | KIAA1609     |
| 8003158 | -0,34 | -1,27 | 0,31322 | 0,80  | 1,74  | 0,07343 | NM_020947       |           | OR52E6       |
| 7946109 | -0,34 | -1,27 | 0,41824 | -1,64 | -3,13 | 0,00031 | NM_001005167    |           | FURIN        |
| 7986092 | -0,34 | -1,27 | 0,38287 | 1,88  | 3,68  | 0,00142 | NM_002569       |           | GLYCTK       |
| 8080212 | -0,34 | -1,27 | 0,32929 | -1,36 | -2,57 | 0,00712 | NM_145262       |           | HIST1H4A     |
| 8117334 | -0,34 | -1,27 | 0,46090 | -0,43 | -1,34 | 0,07508 | NM_003538       |           | SNORA60      |
| 8062490 | -0,34 | -1,27 | 0,53807 | -1,10 | -2,14 | 0,06920 | NR_002986       |           | SCGB3A2      |
| 8108995 | -0,35 | -1,27 | 0,27828 | -1,44 | -2,72 | 0,02094 | NM_054023       |           | EPHB1        |
| 8090891 | -0,35 | -1,27 | 0,27128 | -1,07 | -2,09 | 0,00529 | NM_004441       |           | SRRM1        |
| 7898975 | -0,35 | -1,27 | 0,43061 | 0,31  | 1,24  | 0,22471 | NM_005839       |           | ---          |
| 8063447 | -0,35 | -1,27 | 0,69831 | -3,16 | -8,94 | 0,03255 | ---             | ARL5C     |              |
| 8014787 | -0,35 | -1,27 | 0,44261 | -0,59 | -1,51 | 0,05150 | NM_001143968    |           | ADAT2        |
| 8129963 | -0,35 | -1,27 | 0,28886 | 0,90  | 1,86  | 0,04093 | NM_182503       |           | GRIA2        |
| 8098021 | -0,35 | -1,27 | 0,38547 | -0,86 | -1,82 | 0,23889 | NM_001083619    |           | CHRM1        |
| 7948912 | -0,35 | -1,27 | 0,41998 | -1,60 | -3,02 | 0,00338 | NM_000738       |           | ATP5L2       |
| 8076493 | -0,35 | -1,27 | 0,22527 | -0,96 | -1,95 | 0,02800 | NM_001165877    |           | POLQ         |
| 8089875 | -0,35 | -1,27 | 0,17414 | 0,44  | 1,36  | 0,32033 | NM_199420       |           | ---          |
| 8166047 | -0,35 | -1,27 | 0,03633 | -0,73 | -1,66 | 0,01973 | ---             | SKI       |              |
| 7897068 | -0,35 | -1,27 | 0,26078 | 0,24  | 1,18  | 0,69863 | NM_003036       |           | GPR141       |
| 8132347 | -0,35 | -1,27 | 0,29333 | -0,80 | -1,74 | 0,00423 | NM_181791       |           | ---          |
| 7981288 | -0,35 | -1,27 | 0,57995 | -1,87 | -3,65 | 0,00671 | ---             | PPP2R5B   |              |
| 7941087 | -0,35 | -1,27 | 0,20955 | 0,97  | 1,96  | 0,07372 | NM_006244       |           | RXRB         |
| 8178903 | -0,35 | -1,27 | 0,63034 | 2,46  | 5,50  | 0,00054 | NM_021976       |           | UNC119       |
| 8013633 | -0,35 | -1,27 | 0,40549 | 0,21  | 1,15  | 0,33232 | NM_054035       |           | HLA-DQB1     |
| 8178826 | -0,35 | -1,27 | 0,09704 | 0,66  | 1,58  | 0,20537 | AK296613        | HLA-DQB1  |              |
| 8180022 | -0,35 | -1,27 | 0,09704 | 0,66  | 1,58  | 0,20537 | AK296613        | TMEM80    |              |
| 7937438 | -0,35 | -1,27 | 0,36618 | 1,25  | 2,39  | 0,05465 | NM_174940       |           | TSSC4        |
| 7937813 | -0,35 | -1,27 | 0,61574 | -1,04 | -2,06 | 0,00464 | NM_005706       |           | ZDHHC15      |
| 8173647 | -0,35 | -1,27 | 0,08523 | -0,88 | -1,85 | 0,04588 | NM_144969       |           | PELI2        |
| 7974533 | -0,35 | -1,27 | 0,38826 | -1,84 | -3,58 | 0,00098 | NM_021255       |           | ZNF709       |
| 8034395 | -0,35 | -1,27 | 0,01216 | -0,78 | -1,72 | 0,04073 | NM_152601       |           | ---          |
| 8151411 | -0,35 | -1,27 | 0,44198 | -0,75 | -1,68 | 0,08470 | ---             | FUBP3     |              |
| 8158686 | -0,35 | -1,27 | 0,36331 | 1,61  | 3,06  | 0,01274 | NM_003934       |           | HMGCS2       |
| 7919055 | -0,35 | -1,27 | 0,00194 | -1,00 | -2,00 | 0,09911 | NM_005518       |           | DENND3       |
| 8148476 | -0,35 | -1,27 | 0,09948 | 1,66  | 3,15  | 0,00304 | NM_014957       |           | ---          |
| 7947127 | -0,35 | -1,27 | 0,04030 | -0,30 | -1,23 | 0,03813 | ---             | OSTCL     |              |
| 8130522 | -0,35 | -1,27 | 0,06985 | -0,27 | -1,20 | 0,30930 | NR_028496       |           | NANOGP1      |
| 7953689 | -0,35 | -1,27 | 0,29175 | -1,43 | -2,69 | 0,05841 | AY455283        | KRT4      |              |
| 7963534 | -0,35 | -1,27 | 0,31645 | 0,58  | 1,49  | 0,01588 | NM_002272       |           | LOC100130428 |
| 7952451 | -0,35 | -1,27 | 0,11146 | -0,34 | -1,27 | 0,37607 | BC040288        | ATP8B1    |              |
| 8021365 | -0,35 | -1,27 | 0,58834 | -0,34 | -1,27 | 0,59274 | NM_005603       |           | DCHS2        |
| 8103260 | -0,35 | -1,27 | 0,05690 | -0,96 | -1,95 | 0,00146 | NM_017639       |           | KRTAP5-2     |
| 7945648 | -0,35 | -1,27 | 0,74937 | -1,68 | -3,21 | 0,05085 | NM_001004325    |           | CPA2         |
| 8136187 | -0,35 | -1,27 | 0,06073 | -0,64 | -1,56 | 0,00794 | NM_001869       |           | CPT1C        |

|         |       |       |         |       |       |         |              |             |
|---------|-------|-------|---------|-------|-------|---------|--------------|-------------|
| 8030448 | -0,35 | -1,27 | 0,26795 | -0,19 | -1,14 | 0,60730 | NM_001136052 | FRG2C       |
| 8080994 | -0,35 | -1,27 | 0,40709 | -0,71 | -1,64 | 0,03187 | NM_001124759 | SNORD115-11 |
| 7982084 | -0,35 | -1,27 | 0,77126 | -2,62 | -6,13 | 0,00103 | NR_003303    | ADC         |
| 7899851 | -0,35 | -1,27 | 0,16969 | 1,31  | 2,49  | 0,09407 | NM_052998    | NFATC1      |
| 8021866 | -0,35 | -1,27 | 0,29012 | 0,42  | 1,34  | 0,42839 | NM_172387    | SNORD25     |
| 7948910 | -0,35 | -1,27 | 0,56195 | 3,69  | 12,87 | 0,00172 | NR_002565    | ---         |
| 8072007 | -0,35 | -1,27 | 0,07682 | -1,27 | -2,42 | 0,06808 | ---          | ---         |
| 8166819 | -0,35 | -1,27 | 0,27462 | -0,48 | -1,40 | 0,00386 | ---          | ---         |
| 8022644 | -0,35 | -1,27 | 0,11401 | -0,72 | -1,65 | 0,08821 | ---          | OR10G3      |
| 7977767 | -0,35 | -1,27 | 0,12655 | -0,41 | -1,33 | 0,00310 | NM_001005465 | TAZ         |
| 8170865 | -0,35 | -1,27 | 0,20250 | 0,66  | 1,58  | 0,08774 | NM_000116    | OR2A20P     |
| 8136983 | -0,35 | -1,27 | 0,67752 | 1,01  | 2,01  | 0,00914 | NR_002158    | ZNF324      |
| 8031956 | -0,35 | -1,27 | 0,55445 | -1,17 | -2,25 | 0,03862 | NM_014347    | HTR7        |
| 7934970 | -0,35 | -1,27 | 0,29754 | -1,40 | -2,63 | 0,03085 | NM_019859    | CYP1A1      |
| 7990391 | -0,35 | -1,27 | 0,41576 | 1,51  | 2,86  | 0,00370 | NM_000499    | FRMD8       |
| 7941260 | -0,35 | -1,27 | 0,25702 | 0,42  | 1,34  | 0,50176 | NM_031904    | LAMB4       |
| 8142232 | -0,35 | -1,27 | 0,26639 | -0,28 | -1,21 | 0,21598 | NM_007356    | GLS2        |
| 7964183 | -0,35 | -1,28 | 0,55860 | 1,04  | 2,05  | 0,02390 | NM_013267    | MTMR9L      |
| 7914516 | -0,35 | -1,28 | 0,42447 | 0,24  | 1,18  | 0,51444 | NR_026850    | ITIH5       |
| 7931977 | -0,35 | -1,28 | 0,33638 | -0,82 | -1,76 | 0,05441 | NM_030569    | C12orf36    |
| 7961413 | -0,35 | -1,28 | 0,34856 | -0,71 | -1,63 | 0,00000 | NM_182558    | ---         |
| 7961420 | -0,35 | -1,28 | 0,29469 | -0,39 | -1,31 | 0,06402 | ---          | FBXL12      |
| 8033813 | -0,35 | -1,28 | 0,56142 | 2,00  | 3,99  | 0,02501 | NM_017703    | ALS2CR12    |
| 8058203 | -0,35 | -1,28 | 0,38429 | -0,32 | -1,25 | 0,07428 | NM_139163    | CERKL       |
| 8057463 | -0,35 | -1,28 | 0,37771 | -0,88 | -1,84 | 0,03449 | NM_201548    | ---         |
| 7928306 | -0,35 | -1,28 | 0,12569 | 0,28  | 1,22  | 0,55929 | ---          | LGALS12     |
| 7940762 | -0,35 | -1,28 | 0,21583 | -1,65 | -3,13 | 0,00000 | NM_001142535 | AFP         |
| 8095646 | -0,35 | -1,28 | 0,03260 | -0,96 | -1,94 | 0,00083 | NM_001134    | ---         |
| 8052141 | -0,35 | -1,28 | 0,31606 | -1,92 | -3,78 | 0,00926 | ---          | ---         |
| 8163017 | -0,35 | -1,28 | 0,11835 | -1,67 | -3,18 | 0,01143 | ---          | NAT8L       |
| 8093578 | -0,35 | -1,28 | 0,04514 | -0,02 | -1,01 | 0,94644 | NM_178557    | CMTM4       |
| 8001830 | -0,35 | -1,28 | 0,36968 | 3,20  | 9,21  | 0,00042 | NM_181521    | TRDMT1      |
| 7932390 | -0,35 | -1,28 | 0,29906 | 0,06  | 1,04  | 0,86882 | NM_004412    | ---         |
| 8062681 | -0,35 | -1,28 | 0,41352 | -0,58 | -1,50 | 0,13407 | ---          | MAFB        |
| 8066266 | -0,35 | -1,28 | 0,07728 | -1,39 | -2,62 | 0,09104 | NM_005461    | EPB41L1     |
| 8062251 | -0,35 | -1,28 | 0,24999 | -0,07 | -1,05 | 0,83199 | NM_012156    | SNORD95     |
| 8116532 | -0,35 | -1,28 | 0,67000 | 0,58  | 1,50  | 0,61631 | NR_002591    | HIST1H1T    |
| 8124402 | -0,35 | -1,28 | 0,17456 | -1,00 | -2,01 | 0,00564 | NM_005323    | OR13C3      |
| 8162931 | -0,35 | -1,28 | 0,28913 | -0,75 | -1,68 | 0,02177 | NM_001001961 | ---         |
| 8165903 | -0,35 | -1,28 | 0,27241 | -1,05 | -2,07 | 0,04183 | ---          | SNORD7      |
| 8006540 | -0,35 | -1,28 | 0,05156 | -0,38 | -1,30 | 0,00034 | NR_003037    | ---         |
| 8096661 | -0,35 | -1,28 | 0,29588 | -0,61 | -1,53 | 0,31784 | ---          | PLEKHH3     |
| 8015665 | -0,35 | -1,28 | 0,56592 | -1,13 | -2,18 | 0,04323 | NM_024927    | ---         |
| 8028323 | -0,35 | -1,28 | 0,12191 | -0,83 | -1,78 | 0,03102 | ---          | SLCO4C1     |
| 8113369 | -0,35 | -1,28 | 0,13547 | 0,37  | 1,29  | 0,24308 | NM_180991    | ---         |
| 8126016 | -0,35 | -1,28 | 0,17181 | -0,79 | -1,72 | 0,04307 | ---          | ---         |
| 8098163 | -0,35 | -1,28 | 0,67779 | -0,58 | -1,50 | 0,05231 | ---          | CCDC105     |
| 8026390 | -0,35 | -1,28 | 0,14841 | -0,97 | -1,97 | 0,08225 | NM_173482    | PRH1        |
| 7961259 | -0,35 | -1,28 | 0,07961 | 0,25  | 1,19  | 0,55157 | NM_006250    | ---         |
| 7972175 | -0,35 | -1,28 | 0,51996 | -0,84 | -1,79 | 0,41496 | ---          | AVIL        |
| 7964555 | -0,35 | -1,28 | 0,06824 | -0,43 | -1,35 | 0,33613 | NM_006576    | ---         |
| 8080619 | -0,35 | -1,28 | 0,40733 | -0,60 | -1,52 | 0,24071 | ---          | ---         |
| 8148047 | -0,35 | -1,28 | 0,06248 | -0,89 | -1,85 | 0,01682 | ---          | LIG1        |
| 8037991 | -0,35 | -1,28 | 0,16599 | -0,12 | -1,08 | 0,50910 | NM_000234    | NLRP2       |
| 8031398 | -0,35 | -1,28 | 0,17308 | -0,97 | -1,95 | 0,00362 | NM_017852    | MOG         |
| 8179011 | -0,35 | -1,28 | 0,21210 | -1,27 | -2,41 | 0,00503 | NM_206809    | GIMAP7      |
| 8137240 | -0,35 | -1,28 | 0,33675 | -0,84 | -1,78 | 0,05725 | NM_153236    | OR6C1       |
| 7955989 | -0,35 | -1,28 | 0,20078 | -0,19 | -1,14 | 0,20196 | NM_001005182 | ---         |
| 8038441 | -0,35 | -1,28 | 0,15298 | -0,83 | -1,78 | 0,00135 | ---          | ---         |
| 8124183 | -0,36 | -1,28 | 0,41431 | -1,07 | -2,10 | 0,06977 | ---          | CCL3L1      |
| 8014391 | -0,36 | -1,28 | 0,49334 | -0,94 | -1,92 | 0,02378 | NM_021006    | CCL3L1      |
| 8014414 | -0,36 | -1,28 | 0,49334 | -0,94 | -1,92 | 0,02378 | NM_021006    | CCL3L1      |
| 8019731 | -0,36 | -1,28 | 0,49334 | -0,94 | -1,92 | 0,02378 | NM_021006    | PBXIP1      |
| 7920575 | -0,36 | -1,28 | 0,10273 | 0,06  | 1,04  | 0,87523 | NM_020524    | MAP2K3      |
| 8005707 | -0,36 | -1,28 | 0,23612 | 0,72  | 1,65  | 0,04763 | NM_145109    | SUCNR1      |
| 8083422 | -0,36 | -1,28 | 0,43959 | -0,66 | -1,58 | 0,05683 | NM_033050    | HEATR4      |
| 7980024 | -0,36 | -1,28 | 0,57159 | 0,82  | 1,76  | 0,21797 | NM_203309    | ---         |
| 8050803 | -0,36 | -1,28 | 0,06526 | -0,67 | -1,59 | 0,00341 | ---          | MS4A7       |
| 7940259 | -0,36 | -1,28 | 0,05229 | -1,69 | -3,23 | 0,00285 | NM_021201    | SNORA49     |
| 7960052 | -0,36 | -1,28 | 0,05470 | -0,83 | -1,78 | 0,20574 | NR_002979    | ZSCAN21     |
| 8134689 | -0,36 | -1,28 | 0,17657 | -0,30 | -1,23 | 0,16401 | NM_145914    | ---         |
| 8002939 | -0,36 | -1,28 | 0,45165 | -1,53 | -2,88 | 0,02273 | ---          | FAM13C      |
| 7933733 | -0,36 | -1,28 | 0,18126 | -0,88 | -1,84 | 0,00240 | NM_198215    | GOLGA8DP    |

|         |       |       |         |       |        |         |                  |            |
|---------|-------|-------|---------|-------|--------|---------|------------------|------------|
| 7991695 | -0,36 | -1,28 | 0,46294 | -0,40 | -1,32  | 0,42355 | NR_027407        | MIR145     |
| 8109159 | -0,36 | -1,28 | 0,02633 | -0,73 | -1,65  | 0,03507 | NR_029686        | R3HCC1     |
| 8145272 | -0,36 | -1,28 | 0,19043 | 1,43  | 2,70   | 0,03122 | NM_001136108     | ---        |
| 8022439 | -0,36 | -1,28 | 0,17649 | -0,37 | -1,30  | 0,10470 | --- FAM187B      | ---        |
| 8036069 | -0,36 | -1,28 | 0,45466 | -1,22 | -2,33  | 0,05402 | NM_152481        | C19orf26   |
| 8032197 | -0,36 | -1,28 | 0,57034 | -0,20 | -1,14  | 0,70244 | NM_152769        | C8orf80    |
| 8149979 | -0,36 | -1,28 | 0,24897 | -1,07 | -2,10  | 0,14272 | NM_001010906     | ST6GALNAC1 |
| 8018774 | -0,36 | -1,28 | 0,46682 | -0,48 | -1,39  | 0,00427 | NM_018414        | ---        |
| 8133038 | -0,36 | -1,28 | 0,72535 | -3,70 | -12,95 | 0,00016 | --- ---          | ---        |
| 8066557 | -0,36 | -1,28 | 0,28296 | -0,28 | -1,22  | 0,48157 | --- ---          | ---        |
| 8023545 | -0,36 | -1,28 | 0,27253 | -0,72 | -1,64  | 0,00113 | --- MIR30C2      | ---        |
| 8127498 | -0,36 | -1,28 | 0,06133 | -0,79 | -1,72  | 0,06849 | NR_029598        | EFNB2      |
| 7972713 | -0,36 | -1,28 | 0,07268 | -0,86 | -1,82  | 0,24034 | NM_004093        | ---        |
| 7959818 | -0,36 | -1,28 | 0,42655 | -1,17 | -2,25  | 0,01288 | --- ---          | ---        |
| 8145685 | -0,36 | -1,28 | 0,14069 | -0,85 | -1,80  | 0,01708 | --- CHST9        | ---        |
| 8022666 | -0,36 | -1,28 | 0,15473 | -0,95 | -1,94  | 0,00045 | NM_031422        | ---        |
| 8036989 | -0,36 | -1,28 | 0,31598 | -1,23 | -2,34  | 0,16850 | --- SNORD42A     | ---        |
| 8005955 | -0,36 | -1,28 | 0,27912 | -0,17 | -1,13  | 0,53382 | NR_000014        | DCAF12L2   |
| 8174968 | -0,36 | -1,28 | 0,43912 | -0,63 | -1,55  | 0,06133 | NM_001013628     | ASPHD1     |
| 7994675 | -0,36 | -1,28 | 0,18614 | 0,19  | 1,14   | 0,17456 | NM_181718        | MAP2K7     |
| 8025351 | -0,36 | -1,28 | 0,14168 | 0,39  | 1,31   | 0,34467 | NM_145185        | ZIK1       |
| 8031768 | -0,36 | -1,28 | 0,49583 | -0,47 | -1,39  | 0,00298 | NM_001010879     | AARS2      |
| 8126681 | -0,36 | -1,28 | 0,29145 | 0,53  | 1,44   | 0,09326 | NM_020745        | ZWINT      |
| 7933707 | -0,36 | -1,28 | 0,30809 | 0,08  | 1,06   | 0,81475 | NM_032997        | GNRH1      |
| 8149849 | -0,36 | -1,28 | 0,09978 | -0,88 | -1,84  | 0,15724 | NM_000825        | ---        |
| 8001691 | -0,36 | -1,28 | 0,30903 | -0,40 | -1,32  | 0,01464 | --- MYO15B       | ---        |
| 8009875 | -0,36 | -1,28 | 0,39413 | 0,31  | 1,24   | 0,32596 | NR_003587        | ---        |
| 8091340 | -0,36 | -1,28 | 0,33935 | -0,70 | -1,63  | 0,00248 | --- ---          | ---        |
| 8161854 | -0,36 | -1,28 | 0,54198 | -1,40 | -2,64  | 0,02206 | --- FNDC1        | ---        |
| 8123104 | -0,36 | -1,28 | 0,26547 | 0,26  | 1,20   | 0,40138 | NM_032532        | C7orf47    |
| 8141517 | -0,36 | -1,28 | 0,05093 | 1,36  | 2,56   | 0,02008 | BC026269 DCUN1D3 | ---        |
| 8000028 | -0,36 | -1,28 | 0,28459 | 1,34  | 2,53   | 0,27353 | NM_173475        | HSFY2      |
| 8176681 | -0,36 | -1,28 | 0,08038 | -0,68 | -1,60  | 0,01232 | NR_003509        | HSFY2      |
| 8177201 | -0,36 | -1,28 | 0,08038 | -0,68 | -1,60  | 0,01232 | NR_003509        | C19orf48   |
| 8038624 | -0,36 | -1,28 | 0,06456 | 1,87  | 3,66   | 0,02005 | NM_199249        | ---        |
| 8066292 | -0,36 | -1,28 | 0,09350 | -0,75 | -1,68  | 0,20059 | --- PNKD         | ---        |
| 8048257 | -0,36 | -1,28 | 0,45288 | 2,07  | 4,21   | 0,01468 | NM_015488        | LOC151009  |
| 8054513 | -0,36 | -1,28 | 0,66227 | 0,18  | 1,14   | 0,26842 | NR_027244        | ---        |
| 7966148 | -0,36 | -1,28 | 0,14315 | -1,01 | -2,02  | 0,00102 | --- OR1L6        | ---        |
| 8157688 | -0,36 | -1,28 | 0,26767 | -1,28 | -2,42  | 0,00560 | NM_001004453     | FFAR2      |
| 8027862 | -0,36 | -1,28 | 0,23522 | -0,79 | -1,72  | 0,06236 | NM_005306        | CD3EAP     |
| 8029688 | -0,36 | -1,28 | 0,18611 | 0,12  | 1,09   | 0,70947 | NM_012099        | CNGA1      |
| 8100202 | -0,36 | -1,28 | 0,23186 | -0,15 | -1,11  | 0,58269 | NM_001142564     | FAM78A     |
| 8164644 | -0,36 | -1,28 | 0,29908 | -0,80 | -1,74  | 0,06445 | NM_033387        | MIR24-1    |
| 8156573 | -0,36 | -1,28 | 0,02776 | -0,93 | -1,91  | 0,02793 | NR_029496        | KIFC1      |
| 8118669 | -0,36 | -1,28 | 0,42037 | 1,41  | 2,66   | 0,00544 | NM_002263        | ---        |
| 8109401 | -0,36 | -1,28 | 0,23500 | -1,39 | -2,61  | 0,14336 | --- ---          | ---        |
| 8108376 | -0,36 | -1,28 | 0,39038 | -1,82 | -3,52  | 0,01992 | --- AQP11        | ---        |
| 7942774 | -0,36 | -1,28 | 0,26478 | 0,23  | 1,17   | 0,10714 | NM_173039        | CCDC148    |
| 8056022 | -0,36 | -1,28 | 0,06734 | -0,68 | -1,60  | 0,02050 | NM_138803        | GAMT       |
| 8032214 | -0,36 | -1,28 | 0,17076 | -0,17 | -1,12  | 0,49504 | NM_000156        | C12orf65   |
| 7959563 | -0,36 | -1,28 | 0,49477 | 0,37  | 1,29   | 0,24727 | NM_152269        | TECPR2     |
| 7976976 | -0,36 | -1,28 | 0,04150 | 1,72  | 3,30   | 0,00090 | NM_014844        | MESDC1     |
| 7985349 | -0,36 | -1,28 | 0,57438 | 0,52  | 1,43   | 0,20100 | NM_022566        | LIN28B     |
| 8121251 | -0,36 | -1,28 | 0,44648 | -0,98 | -1,98  | 0,01732 | NM_001004317     | CENPQ      |
| 8120165 | -0,36 | -1,28 | 0,04339 | 0,89  | 1,85   | 0,19632 | NM_018132        | SLC13A3    |
| 8066757 | -0,36 | -1,28 | 0,38038 | -0,85 | -1,80  | 0,00821 | NM_022829        | SPATA1     |
| 7902645 | -0,36 | -1,28 | 0,12597 | -0,74 | -1,67  | 0,04646 | NM_001081472     | HNF1B      |
| 8014591 | -0,36 | -1,28 | 0,37495 | 3,28  | 9,73   | 0,00009 | NM_000458        | MSX1       |
| 8093852 | -0,36 | -1,28 | 0,33946 | -1,16 | -2,23  | 0,02346 | NM_002448        | ---        |
| 8144878 | -0,36 | -1,28 | 0,08556 | -0,62 | -1,53  | 0,09452 | --- SPHKAP       | ---        |
| 8059551 | -0,36 | -1,28 | 0,44513 | -0,72 | -1,64  | 0,00329 | NM_001142644     | ---        |
| 7917972 | -0,36 | -1,28 | 0,18823 | -0,48 | -1,39  | 0,03410 | --- GPR137C      | ---        |
| 7974372 | -0,36 | -1,29 | 0,29330 | -0,17 | -1,12  | 0,63861 | NM_001099652     | FAM128A    |
| 8045148 | -0,36 | -1,29 | 0,40034 | 0,04  | 1,03   | 0,91851 | ENST00000427024  | FAM128A    |
| 8055284 | -0,36 | -1,29 | 0,40034 | 0,04  | 1,03   | 0,91851 | ENST00000427024  | ZNF701     |
| 8030950 | -0,36 | -1,29 | 0,40951 | -0,07 | -1,05  | 0,85130 | NM_018260        | AGT        |
| 7924987 | -0,36 | -1,29 | 0,49368 | -1,64 | -3,12  | 0,00190 | NM_000029        | GEFT       |
| 7956551 | -0,36 | -1,29 | 0,26145 | 0,62  | 1,53   | 0,23353 | NM_182947        | ---        |
| 7900508 | -0,36 | -1,29 | 0,32685 | -0,24 | -1,18  | 0,19494 | --- ---          | ---        |
| 8139196 | -0,36 | -1,29 | 0,15724 | -0,53 | -1,45  | 0,01864 | --- NODAL        | ---        |
| 7934156 | -0,36 | -1,29 | 0,19601 | -0,53 | -1,45  | 0,08006 | NM_018055        | ERCC6L     |
| 8173506 | -0,36 | -1,29 | 0,24007 | -0,06 | -1,04  | 0,74242 | NM_017669        | ---        |

|         |       |       |         |       |       |         |                 |               |
|---------|-------|-------|---------|-------|-------|---------|-----------------|---------------|
| 7900633 | -0,36 | -1,29 | 0,10666 | -1,31 | -2,48 | 0,03261 | ---             | C16orf91      |
| 7998485 | -0,36 | -1,29 | 0,60259 | -0,27 | -1,21 | 0,28577 | NM_001010878    | MFI2          |
| 8093171 | -0,36 | -1,29 | 0,37803 | 1,68  | 3,21  | 0,03021 | NM_005929       | LBP           |
| 8062461 | -0,36 | -1,29 | 0,38600 | -0,93 | -1,90 | 0,04328 | NM_004139       | ADCK2         |
| 8136591 | -0,36 | -1,29 | 0,48611 | 0,01  | 1,01  | 0,96965 | NM_052853       | OR5D18        |
| 7939946 | -0,36 | -1,29 | 0,34791 | -1,39 | -2,63 | 0,07961 | NM_001001952    | C9orf98       |
| 8164766 | -0,36 | -1,29 | 0,08408 | 0,02  | 1,01  | 0,91868 | NM_152572       | ZC3H12B       |
| 8167957 | -0,36 | -1,29 | 0,03879 | -1,09 | -2,13 | 0,09074 | NM_001010888    | TAF5          |
| 7930213 | -0,36 | -1,29 | 0,02568 | 1,39  | 2,62  | 0,00209 | NM_006951       | ---           |
| 8113122 | -0,36 | -1,29 | 0,37537 | -1,84 | -3,58 | 0,01991 | ---             | ALS2CR11      |
| 8058238 | -0,36 | -1,29 | 0,28995 | -0,27 | -1,21 | 0,37109 | NM_001168221    | ---           |
| 7900336 | -0,36 | -1,29 | 0,22952 | -0,56 | -1,48 | 0,02359 | ---             | C1orf59       |
| 7918223 | -0,36 | -1,29 | 0,17948 | 1,04  | 2,05  | 0,00317 | NM_144584       | VASP          |
| 8029710 | -0,36 | -1,29 | 0,34294 | -0,77 | -1,70 | 0,16978 | NM_003370       | DKFZp434H1419 |
| 8048171 | -0,36 | -1,29 | 0,43181 | 0,95  | 1,94  | 0,00817 | AK125369        | RPL29         |
| 8087830 | -0,36 | -1,29 | 0,72114 | 0,06  | 1,04  | 0,95537 | NM_000992       | TEX11         |
| 8173381 | -0,36 | -1,29 | 0,09086 | -0,56 | -1,47 | 0,10198 | NM_001003811    | RNF215        |
| 8075365 | -0,36 | -1,29 | 0,21096 | -0,29 | -1,22 | 0,47681 | NM_001017981    | LOC221442     |
| 8119423 | -0,36 | -1,29 | 0,45418 | -1,23 | -2,34 | 0,37814 | NR_026938       | ---           |
| 7930775 | -0,36 | -1,29 | 0,25980 | -2,07 | -4,20 | 0,03050 | ---             | OR56A4        |
| 7946117 | -0,37 | -1,29 | 0,47687 | -1,38 | -2,60 | 0,00008 | NM_001005179    | ERN1          |
| 8017555 | -0,37 | -1,29 | 0,06498 | 0,99  | 1,98  | 0,01932 | NM_001433       | CAD           |
| 8040843 | -0,37 | -1,29 | 0,08446 | 2,13  | 4,39  | 0,01261 | NM_004341       | DHODH         |
| 7997179 | -0,37 | -1,29 | 0,14374 | 1,05  | 2,07  | 0,01279 | NM_001361       | MYOM1         |
| 8022045 | -0,37 | -1,29 | 0,10102 | 0,09  | 1,06  | 0,48312 | NM_003803       | ---           |
| 8078958 | -0,37 | -1,29 | 0,01334 | -0,48 | -1,39 | 0,07878 | ---             | ---           |
| 8061127 | -0,37 | -1,29 | 0,30184 | -0,54 | -1,45 | 0,10086 | ---             | C1orf66       |
| 7906223 | -0,37 | -1,29 | 0,33554 | 2,21  | 4,61  | 0,00491 | NM_015997       | KRTAP5-9      |
| 7942261 | -0,37 | -1,29 | 0,52986 | -0,45 | -1,37 | 0,07694 | NM_005553       | ---           |
| 7939996 | -0,37 | -1,29 | 0,33167 | -0,68 | -1,60 | 0,03581 | ---             | C8orf51       |
| 8153405 | -0,37 | -1,29 | 0,10570 | 2,06  | 4,17  | 0,00050 | NR_026785       | C19orf73      |
| 8038314 | -0,37 | -1,29 | 0,29959 | 0,87  | 1,82  | 0,07757 | NM_018111       | JAKMIP1       |
| 8099200 | -0,37 | -1,29 | 0,42206 | -0,75 | -1,68 | 0,00958 | NM_144720       | ---           |
| 8046500 | -0,37 | -1,29 | 0,30121 | -0,92 | -1,90 | 0,00390 | ---             | ---           |
| 7981714 | -0,37 | -1,29 | 0,66154 | -2,34 | -5,05 | 0,00028 | ---             | GDF9          |
| 8114080 | -0,37 | -1,29 | 0,29946 | 0,16  | 1,11  | 0,72736 | NM_005260       | PTPRB         |
| 7964872 | -0,37 | -1,29 | 0,09992 | -0,68 | -1,60 | 0,00735 | NM_001109754    | ---           |
| 7981523 | -0,37 | -1,29 | 0,57585 | -0,82 | -1,77 | 0,00500 | ---             | PPFIA3        |
| 8030220 | -0,37 | -1,29 | 0,07869 | -0,31 | -1,24 | 0,22850 | NM_003660       | ---           |
| 8174646 | -0,37 | -1,29 | 0,33031 | -1,52 | -2,87 | 0,03610 | ---             | ---           |
| 8167726 | -0,37 | -1,29 | 0,07205 | -0,95 | -1,94 | 0,00032 | ---             | COL6A6        |
| 8082597 | -0,37 | -1,29 | 0,31377 | -0,65 | -1,57 | 0,05669 | NM_001102608    | hCG_1732469   |
| 8054465 | -0,37 | -1,29 | 0,68473 | -0,82 | -1,76 | 0,00099 | ENST00000429128 | ---           |
| 8155944 | -0,37 | -1,29 | 0,32468 | -0,96 | -1,94 | 0,01670 | ---             | TLCD1         |
| 8013771 | -0,37 | -1,29 | 0,46832 | 2,93  | 7,63  | 0,00060 | NM_138463       | FHOD1         |
| 8001981 | -0,37 | -1,29 | 0,21797 | 0,94  | 1,92  | 0,02945 | NM_013241       | ---           |
| 7966181 | -0,37 | -1,29 | 0,08810 | -0,58 | -1,50 | 0,01431 | ---             | PLG           |
| 8123259 | -0,37 | -1,29 | 0,03772 | -1,01 | -2,02 | 0,06896 | NM_000301       | SSX4          |
| 8167261 | -0,37 | -1,29 | 0,52689 | -1,33 | -2,51 | 0,00091 | NM_005636       | MAST3         |
| 8026926 | -0,37 | -1,29 | 0,09305 | 0,37  | 1,29  | 0,41262 | NM_015016       | ---           |
| 7969675 | -0,37 | -1,29 | 0,25321 | -1,74 | -3,33 | 0,00627 | ---             | G6PC2         |
| 8046116 | -0,37 | -1,29 | 0,29294 | -0,86 | -1,81 | 0,01194 | NM_021176       | ---           |
| 7926563 | -0,37 | -1,29 | 0,18581 | -0,67 | -1,59 | 0,08991 | ---             | LOC400464     |
| 7986428 | -0,37 | -1,29 | 0,40255 | -0,82 | -1,77 | 0,00046 | AK127420        | IRF3          |
| 8038416 | -0,37 | -1,29 | 0,41068 | 0,89  | 1,86  | 0,08640 | NM_001571       | MS4A6A        |
| 7948455 | -0,37 | -1,29 | 0,12665 | -0,78 | -1,72 | 0,15875 | NM_152852       | TMEM163       |
| 8055350 | -0,37 | -1,29 | 0,11361 | 0,63  | 1,55  | 0,13701 | NM_030923       | CLDN24        |
| 8103879 | -0,37 | -1,29 | 0,13755 | -0,24 | -1,18 | 0,09981 | ENST00000329738 | RBM43         |
| 8055697 | -0,37 | -1,29 | 0,27596 | -0,70 | -1,62 | 0,02198 | NM_198557       | SLC22A14      |
| 8078772 | -0,37 | -1,29 | 0,30709 | -0,66 | -1,58 | 0,02521 | NM_004803       | SNORA38B      |
| 8009380 | -0,37 | -1,29 | 0,24850 | -1,23 | -2,35 | 0,01442 | NR_003706       | ZNF716        |
| 8133018 | -0,37 | -1,29 | 0,41986 | -1,33 | -2,51 | 0,03827 | NM_001159279    | DNER          |
| 8059580 | -0,37 | -1,29 | 0,37336 | -1,65 | -3,13 | 0,00464 | NM_139072       | ZNF782        |
| 8162639 | -0,37 | -1,29 | 0,06388 | -0,41 | -1,33 | 0,02100 | NM_001001662    | FAM101B       |
| 8010915 | -0,37 | -1,29 | 0,53205 | 2,68  | 6,42  | 0,00164 | NM_182705       | ---           |
| 8163255 | -0,37 | -1,29 | 0,31631 | -0,74 | -1,67 | 0,00653 | ---             | ---           |
| 7927595 | -0,37 | -1,29 | 0,15271 | -0,76 | -1,70 | 0,16662 | ---             | KIAA1524      |
| 8089372 | -0,37 | -1,29 | 0,55570 | 1,74  | 3,34  | 0,00870 | NM_020890       | ---           |
| 7962916 | -0,37 | -1,29 | 0,17048 | -0,78 | -1,72 | 0,02334 | ---             | SPEF2         |
| 8104856 | -0,37 | -1,29 | 0,14319 | -1,51 | -2,86 | 0,01095 | NM_024867       | CPXM1         |
| 8064539 | -0,37 | -1,29 | 0,39269 | -1,56 | -2,96 | 0,01658 | NM_019609       | ADAMTS12      |
| 8111387 | -0,37 | -1,29 | 0,33171 | -1,02 | -2,03 | 0,05742 | NM_030955       | PAGE2         |
| 8167866 | -0,37 | -1,29 | 0,68890 | -1,00 | -2,00 | 0,18166 | NM_207339       | RAPGEF1       |

|         |       |       |         |       |       |         |                    |             |
|---------|-------|-------|---------|-------|-------|---------|--------------------|-------------|
| 8164692 | -0,37 | -1,29 | 0,02880 | -0,46 | -1,38 | 0,03868 | AF467069 RUNDC2C   |             |
| 7994576 | -0,37 | -1,29 | 0,39495 | -0,22 | -1,17 | 0,20230 | NR_002939          | OCLN        |
| 8105908 | -0,37 | -1,29 | 0,35075 | 4,66  | 25,27 | 0,00104 | NM_002538          | ---         |
| 8115664 | -0,37 | -1,29 | 0,32937 | -0,09 | -1,06 | 0,84213 | ---                | HIST1H2AH   |
| 8117543 | -0,37 | -1,29 | 0,54035 | -0,95 | -1,93 | 0,00436 | NM_080596          | C21orf82    |
| 8068363 | -0,37 | -1,29 | 0,14268 | -0,63 | -1,54 | 0,01052 | NR_027267          | ADAMTSL4    |
| 7905233 | -0,37 | -1,29 | 0,35899 | 0,88  | 1,84  | 0,07555 | NM_019032          | C8orf44     |
| 8146711 | -0,37 | -1,29 | 0,26039 | 0,08  | 1,06  | 0,64399 | NM_019607          | FGF21       |
| 8030105 | -0,37 | -1,29 | 0,28431 | -0,21 | -1,16 | 0,60108 | NM_019113          | CYP2C9      |
| 7929487 | -0,37 | -1,29 | 0,39616 | -0,90 | -1,87 | 0,00778 | NM_000771          | C9orf156    |
| 8162706 | -0,37 | -1,29 | 0,22228 | 0,30  | 1,23  | 0,26979 | NM_016481          | GPR151      |
| 8114896 | -0,37 | -1,29 | 0,05110 | -1,31 | -2,48 | 0,06329 | NM_194251          | COQ3        |
| 8128383 | -0,37 | -1,29 | 0,10161 | 1,43  | 2,69  | 0,00556 | NM_017421          | UNC93A      |
| 8123388 | -0,37 | -1,29 | 0,13054 | -1,42 | -2,68 | 0,00480 | NM_018974          | ESR1        |
| 8122840 | -0,37 | -1,29 | 0,20994 | -1,04 | -2,05 | 0,14577 | NM_001122741       | C6orf52     |
| 8123884 | -0,37 | -1,29 | 0,32661 | -0,17 | -1,12 | 0,26823 | NR_026737          | ---         |
| 8157608 | -0,37 | -1,29 | 0,08959 | -0,64 | -1,56 | 0,00472 | ---                | HTRA3       |
| 8094056 | -0,37 | -1,29 | 0,31667 | -0,29 | -1,22 | 0,27926 | NM_053044          | MCM2        |
| 8082350 | -0,37 | -1,29 | 0,48934 | 0,59  | 1,51  | 0,32511 | NM_004526          | QTRT1       |
| 8025728 | -0,37 | -1,29 | 0,27016 | 1,12  | 2,17  | 0,02524 | NM_031209          | SNORD116-13 |
| 7981974 | -0,37 | -1,29 | 0,00576 | -0,28 | -1,22 | 0,11548 | NR_003328          | RPL36AP40   |
| 7947152 | -0,37 | -1,30 | 0,21465 | -0,83 | -1,78 | 0,00029 | BC058160 HIST3H2BB |             |
| 7910369 | -0,37 | -1,30 | 0,08192 | -0,50 | -1,41 | 0,27673 | NM_175055          | C1orf175    |
| 7901634 | -0,37 | -1,30 | 0,51787 | -1,52 | -2,87 | 0,00618 | NR_026782          | ---         |
| 8151252 | -0,37 | -1,30 | 0,11584 | -0,15 | -1,11 | 0,62145 | ---                | UBE2O       |
| 8018708 | -0,37 | -1,30 | 0,25703 | 1,57  | 2,97  | 0,00135 | NM_022066          | TBX20       |
| 8138997 | -0,37 | -1,30 | 0,27136 | 1,14  | 2,20  | 0,11656 | NM_001077653       | ---         |
| 8177273 | -0,37 | -1,30 | 0,53241 | -0,73 | -1,66 | 0,02675 | ---                | SH3BGRL3    |
| 7899153 | -0,37 | -1,30 | 0,24155 | -0,07 | -1,05 | 0,78685 | NM_031286          | OR10A4      |
| 7938179 | -0,37 | -1,30 | 0,54303 | -0,58 | -1,49 | 0,00063 | NM_207186          | ACTR3B      |
| 8137474 | -0,37 | -1,30 | 0,34493 | 1,12  | 2,18  | 0,01275 | NM_020445          | CSK         |
| 7984871 | -0,37 | -1,30 | 0,11094 | 0,04  | 1,03  | 0,94908 | NM_004383          | TAS2R9      |
| 7961245 | -0,37 | -1,30 | 0,14528 | -1,18 | -2,26 | 0,03951 | NM_023917          | RNF5P1      |
| 8150356 | -0,37 | -1,30 | 0,10888 | 0,68  | 1,60  | 0,00556 | NR_003129          | A2ML1       |
| 7953775 | -0,37 | -1,30 | 0,01793 | -0,91 | -1,88 | 0,00186 | NM_144670          | LOC121952   |
| 7969955 | -0,37 | -1,30 | 0,36019 | -1,24 | -2,36 | 0,00761 | NR_026965          | ZNRD1       |
| 8179055 | -0,37 | -1,30 | 0,63637 | 3,84  | 14,33 | 0,00136 | NM_170783          | ---         |
| 7989144 | -0,38 | -1,30 | 0,36810 | -0,83 | -1,78 | 0,00098 | ---                | ---         |
| 8042460 | -0,38 | -1,30 | 0,12889 | -1,31 | -2,48 | 0,00096 | ---                | SNX15       |
| 7941111 | -0,38 | -1,30 | 0,21923 | -0,31 | -1,24 | 0,21521 | NM_013306          | EEF1DP3     |
| 7968411 | -0,38 | -1,30 | 0,36833 | -0,82 | -1,77 | 0,06235 | NR_027062          | CCDC150     |
| 8047187 | -0,38 | -1,30 | 0,00006 | -0,42 | -1,33 | 0,00610 | NM_001080539       | SERHL2      |
| 8073596 | -0,38 | -1,30 | 0,30179 | -0,63 | -1,55 | 0,05791 | NM_014509          | ODZ4        |
| 7950701 | -0,38 | -1,30 | 0,18118 | -1,15 | -2,23 | 0,00936 | NM_001098816       | SLC01A2     |
| 7961626 | -0,38 | -1,30 | 0,20534 | -0,65 | -1,57 | 0,01219 | NM_134431          | ---         |
| 7899909 | -0,38 | -1,30 | 0,68835 | -0,25 | -1,19 | 0,72264 | ---                | C19orf41    |
| 8038532 | -0,38 | -1,30 | 0,43736 | -1,25 | -2,38 | 0,00618 | NM_152358          | HPR         |
| 7997192 | -0,38 | -1,30 | 0,30155 | -1,06 | -2,09 | 0,01074 | NM_020995          | ATP2A3      |
| 8011516 | -0,38 | -1,30 | 0,31418 | 0,65  | 1,57  | 0,33273 | NM_174954          | C16orf3     |
| 8003566 | -0,38 | -1,30 | 0,37578 | -1,05 | -2,07 | 0,01224 | NM_001214          | METTTL7A    |
| 7955441 | -0,38 | -1,30 | 0,42157 | -0,95 | -1,93 | 0,02977 | NM_014033          | TM4SF19     |
| 8093104 | -0,38 | -1,30 | 0,44478 | 0,00  | 1,00  | 0,99129 | NM_138461          | ANKRD62     |
| 8020197 | -0,38 | -1,30 | 0,05518 | -0,72 | -1,64 | 0,00027 | ENST00000314074    | SNORD115-8  |
| 7982022 | -0,38 | -1,30 | 0,07432 | -0,71 | -1,63 | 0,00575 | NR_003300          | SERPINA13   |
| 7976506 | -0,38 | -1,30 | 0,17753 | -0,44 | -1,36 | 0,00573 | NR_015340          | ---         |
| 8102513 | -0,38 | -1,30 | 0,31198 | -0,65 | -1,57 | 0,08734 | ---                | ---         |
| 8013533 | -0,38 | -1,30 | 0,52458 | -1,45 | -2,74 | 0,00193 | ---                | GJA9        |
| 7915178 | -0,38 | -1,30 | 0,07419 | -1,01 | -2,02 | 0,00313 | NM_030772          | GIN53       |
| 7996211 | -0,38 | -1,30 | 0,57474 | 1,40  | 2,64  | 0,01271 | NM_001126129       | AKAP14      |
| 8169665 | -0,38 | -1,30 | 0,15064 | -1,07 | -2,11 | 0,00292 | NM_178813          | C17orf82    |
| 8008980 | -0,38 | -1,30 | 0,49824 | -2,25 | -4,76 | 0,00012 | NM_203425          | NCRNA00085  |
| 8030848 | -0,38 | -1,30 | 0,57470 | -0,33 | -1,25 | 0,27982 | NR_024330          | MSTN        |
| 8057713 | -0,38 | -1,30 | 0,24981 | -0,51 | -1,42 | 0,03049 | NM_005259          | RASL10A     |
| 8075211 | -0,38 | -1,30 | 0,34678 | -1,16 | -2,23 | 0,00031 | NM_001007279       | ---         |
| 8168620 | -0,38 | -1,30 | 0,06653 | -0,98 | -1,97 | 0,08372 | ---                | UBD         |
| 8178295 | -0,38 | -1,30 | 0,32815 | -1,90 | -3,73 | 0,00387 | NM_006398          | CCR1        |
| 8086600 | -0,38 | -1,30 | 0,03165 | -0,87 | -1,83 | 0,05153 | NM_001295          | ALAS2       |
| 8173135 | -0,38 | -1,30 | 0,53364 | -0,57 | -1,48 | 0,00079 | NM_000032          | CKS1B       |
| 7905826 | -0,38 | -1,30 | 0,37878 | 1,99  | 3,98  | 0,03063 | NR_024163          | PPAPDC3     |
| 8158825 | -0,38 | -1,30 | 0,32683 | 0,12  | 1,09  | 0,67501 | NM_032728          | CAMK2A      |
| 8115122 | -0,38 | -1,30 | 0,17460 | -0,72 | -1,65 | 0,11056 | NM_015981          | AMPH        |
| 8139131 | -0,38 | -1,30 | 0,44575 | -0,42 | -1,34 | 0,03710 | NM_001635          | ZNF840P     |
| 8063174 | -0,38 | -1,30 | 0,30198 | -1,08 | -2,11 | 0,20357 | ENST00000442886    | ---         |

|         |       |       |         |       |       |         |                   |         |              |
|---------|-------|-------|---------|-------|-------|---------|-------------------|---------|--------------|
| 8169154 | -0,38 | -1,30 | 0,04803 | -0,57 | -1,49 | 0,09274 | ---               | BMP3    |              |
| 8096070 | -0,38 | -1,30 | 0,19123 | -1,21 | -2,32 | 0,00020 | NM_001201         |         | PTPN18       |
| 8045182 | -0,38 | -1,30 | 0,11314 | 0,43  | 1,35  | 0,44801 | NM_014369         |         | ---          |
| 8122875 | -0,38 | -1,30 | 0,16547 | -0,56 | -1,47 | 0,20241 | ---               | ---     |              |
| 8122240 | -0,38 | -1,30 | 0,12763 | -1,27 | -2,42 | 0,04632 | ---               | GDA     |              |
| 8155802 | -0,38 | -1,30 | 0,46097 | -1,05 | -2,07 | 0,04918 | NM_004293         |         | P704P        |
| 7972983 | -0,38 | -1,30 | 0,50733 | -1,90 | -3,74 | 0,01296 | NM_001145442      |         | CDH20        |
| 8021484 | -0,38 | -1,30 | 0,11956 | -1,34 | -2,53 | 0,04213 | NM_031891         |         | CHRNA5       |
| 7985213 | -0,38 | -1,30 | 0,31666 | 5,10  | 34,37 | 0,00014 | NM_000745         |         | KIF9         |
| 8086729 | -0,38 | -1,30 | 0,30017 | -1,00 | -2,01 | 0,04552 | NM_182902         |         | FLJ39061     |
| 8047505 | -0,38 | -1,30 | 0,00058 | -1,13 | -2,19 | 0,01442 | BC118982 DEF8     |         |              |
| 7998072 | -0,38 | -1,30 | 0,40735 | 0,25  | 1,19  | 0,51757 | NM_207514         |         | TMEM27       |
| 8171472 | -0,38 | -1,30 | 0,26368 | 0,16  | 1,11  | 0,66899 | NM_020665         |         | ARNT2        |
| 7985285 | -0,38 | -1,30 | 0,39371 | 0,34  | 1,26  | 0,12493 | NM_014862         |         | ---          |
| 8151332 | -0,38 | -1,30 | 0,23692 | -0,74 | -1,67 | 0,04116 | ---               | VILL    |              |
| 8078665 | -0,38 | -1,30 | 0,23711 | -1,29 | -2,44 | 0,00425 | NM_015873         |         | GOLGA6L9     |
| 7991722 | -0,38 | -1,30 | 0,71068 | 0,53  | 1,44  | 0,47042 | NM_198181         |         | IRAK2        |
| 8077786 | -0,38 | -1,30 | 0,43480 | 0,73  | 1,66  | 0,13852 | NM_001570         |         | ---          |
| 7953871 | -0,38 | -1,30 | 0,34313 | -0,73 | -1,66 | 0,04459 | ---               | ANXA2P3 |              |
| 7927801 | -0,38 | -1,30 | 0,16514 | -0,19 | -1,14 | 0,69991 | NR_001446         |         | GOLGA9P      |
| 7986947 | -0,38 | -1,30 | 0,49048 | -1,00 | -2,00 | 0,02771 | NR_024074         |         | ---          |
| 8150862 | -0,38 | -1,30 | 0,21803 | -1,03 | -2,04 | 0,03683 | ---               | RNF157  |              |
| 8018652 | -0,38 | -1,30 | 0,50912 | 3,55  | 11,70 | 0,00079 | NM_052916         |         | CSTL1        |
| 8061382 | -0,38 | -1,30 | 0,13525 | -0,91 | -1,88 | 0,11500 | NM_138283         |         | KIAA1967     |
| 8145201 | -0,38 | -1,30 | 0,23382 | 1,32  | 2,49  | 0,01208 | NM_021174         |         | SNAPC2       |
| 8025368 | -0,38 | -1,30 | 0,09724 | -1,29 | -2,45 | 0,14927 | NM_003083         |         | KIFC3        |
| 8001587 | -0,38 | -1,30 | 0,42856 | 1,04  | 2,05  | 0,13803 | NM_005550         |         | OR52E8       |
| 7946111 | -0,38 | -1,30 | 0,27438 | -1,24 | -2,36 | 0,02797 | NM_001005168      |         | TDRD1        |
| 7930631 | -0,38 | -1,30 | 0,14341 | -0,82 | -1,77 | 0,00038 | NM_198795         |         | PROL1        |
| 8095500 | -0,38 | -1,30 | 0,18650 | -1,08 | -2,11 | 0,00909 | NM_021225         |         | C1orf126     |
| 7912638 | -0,38 | -1,30 | 0,20071 | 0,22  | 1,17  | 0,11707 | NR_027136         |         | OR2F1        |
| 8136963 | -0,38 | -1,30 | 0,44531 | -1,61 | -3,06 | 0,00069 | NM_012369         |         | ---          |
| 8109593 | -0,38 | -1,30 | 0,22116 | -0,80 | -1,74 | 0,02100 | ---               | AGR2    |              |
| 8138381 | -0,38 | -1,30 | 0,14977 | 0,71  | 1,63  | 0,07658 | NM_006408         |         | KHK          |
| 8040802 | -0,38 | -1,30 | 0,27737 | 0,64  | 1,56  | 0,34014 | NM_000221         |         | DNMT3B       |
| 8061746 | -0,38 | -1,30 | 0,23954 | 0,50  | 1,42  | 0,34227 | NM_006892         |         | C17orf91     |
| 8011193 | -0,38 | -1,30 | 0,11768 | -0,53 | -1,45 | 0,12118 | NR_028504         |         | FAM190A      |
| 8096425 | -0,38 | -1,30 | 0,21942 | -0,48 | -1,40 | 0,00123 | NM_001145065      |         | ---          |
| 7969298 | -0,38 | -1,30 | 0,43381 | -2,22 | -4,65 | 0,01498 | ---               | ---     |              |
| 8145827 | -0,38 | -1,30 | 0,13164 | -0,91 | -1,88 | 0,04734 | ---               | CLN3    |              |
| 8000543 | -0,38 | -1,30 | 0,24915 | 0,70  | 1,62  | 0,07084 | NM_000086         |         | ---          |
| 8104729 | -0,38 | -1,30 | 0,28099 | -1,09 | -2,12 | 0,01057 | ---               | SLC4A10 |              |
| 8045974 | -0,38 | -1,30 | 0,00910 | -1,14 | -2,21 | 0,03968 | NM_001178015      |         | XKR9         |
| 8146900 | -0,38 | -1,30 | 0,00716 | -0,62 | -1,53 | 0,06591 | NM_001011720      |         | STARD6       |
| 8023394 | -0,38 | -1,30 | 0,06042 | -0,82 | -1,77 | 0,16212 | NM_139171         |         | MIR34A       |
| 7912248 | -0,38 | -1,30 | 0,17952 | -0,57 | -1,48 | 0,00431 | NR_029610         |         | TRHR         |
| 8147877 | -0,38 | -1,30 | 0,40004 | -1,01 | -2,01 | 0,04677 | NM_003301         |         | TRIM26       |
| 8179638 | -0,38 | -1,30 | 0,01087 | 0,99  | 1,99  | 0,07022 | NM_003449         |         | FLJ16124     |
| 8042346 | -0,38 | -1,30 | 0,38197 | -0,29 | -1,23 | 0,14736 | BC033059 PADI4    |         |              |
| 7898448 | -0,38 | -1,30 | 0,10642 | -0,85 | -1,81 | 0,07977 | NM_012387         |         | PGM5         |
| 8155665 | -0,38 | -1,30 | 0,32979 | -1,37 | -2,59 | 0,01511 | NM_021965         |         | PAGE1        |
| 8172647 | -0,38 | -1,30 | 0,23173 | -0,56 | -1,47 | 0,03320 | NM_003785         |         | ARL10        |
| 8110158 | -0,38 | -1,31 | 0,46078 | 0,24  | 1,18  | 0,22311 | NM_173664         |         | PPOX         |
| 7906688 | -0,38 | -1,31 | 0,08151 | 0,76  | 1,70  | 0,12449 | NM_001122764      |         | ---          |
| 8020802 | -0,38 | -1,31 | 0,13763 | -0,63 | -1,55 | 0,00391 | ---               | ---     |              |
| 8042333 | -0,38 | -1,31 | 0,20000 | -0,14 | -1,10 | 0,16547 | ---               | ZNF713  |              |
| 8132917 | -0,38 | -1,31 | 0,26895 | 0,32  | 1,25  | 0,15992 | NM_182633         |         | BCHE         |
| 8091867 | -0,38 | -1,31 | 0,17790 | -0,54 | -1,46 | 0,10446 | NM_000055         |         | OR51M1       |
| 7938000 | -0,38 | -1,31 | 0,31965 | -1,31 | -2,49 | 0,17628 | NM_001004756      |         | EDDM3A       |
| 7973093 | -0,38 | -1,31 | 0,14810 | -0,56 | -1,48 | 0,03958 | NM_006683         |         | LOC151121    |
| 8055139 | -0,38 | -1,31 | 0,36949 | -0,46 | -1,37 | 0,03836 | AK056598          | ---     |              |
| 8131707 | -0,39 | -1,31 | 0,05820 | -0,85 | -1,80 | 0,00151 | ---               | ---     |              |
| 8021666 | -0,39 | -1,31 | 0,36966 | -0,70 | -1,63 | 0,03440 | ---               | C4orf12 |              |
| 8096147 | -0,39 | -1,31 | 0,41560 | -1,10 | -2,15 | 0,01340 | AY250185 FLJ43879 |         |              |
| 8060020 | -0,39 | -1,31 | 0,18322 | -1,20 | -2,29 | 0,14158 | AK125867 ZC3H15   |         |              |
| 8057561 | -0,39 | -1,31 | 0,41291 | -0,74 | -1,66 | 0,06090 | NM_018471         |         | PCDH19       |
| 8173933 | -0,39 | -1,31 | 0,41364 | -0,93 | -1,90 | 0,05996 | NM_001105243      |         | LOC100133299 |
| 8104568 | -0,39 | -1,31 | 0,51208 | -0,81 | -1,75 | 0,00585 | AY358688 CD209    |         |              |
| 8033445 | -0,39 | -1,31 | 0,02155 | -0,27 | -1,20 | 0,28857 | NR_026692         |         | LIX1         |
| 8113278 | -0,39 | -1,31 | 0,31201 | -0,98 | -1,97 | 0,02660 | NM_153234         |         | TSPO         |
| 8073612 | -0,39 | -1,31 | 0,39942 | 1,66  | 3,17  | 0,07800 | NM_000714         |         | C4BPA        |
| 7909318 | -0,39 | -1,31 | 0,20750 | -1,14 | -2,21 | 0,04042 | NM_000715         |         | C20orf196    |
| 8060796 | -0,39 | -1,31 | 0,39294 | 1,67  | 3,17  | 0,00648 | BC035800 ACBD6    |         |              |



|         |       |       |         |       |       |         |                  |              |
|---------|-------|-------|---------|-------|-------|---------|------------------|--------------|
| 7922656 | -0,39 | -1,31 | 0,17512 | 0,34  | 1,26  | 0,22443 | NM_032360        | GOLGA9P      |
| 7987027 | -0,39 | -1,31 | 0,57196 | -0,20 | -1,15 | 0,53516 | NR_024074        | ITGB6        |
| 8056184 | -0,39 | -1,31 | 0,05170 | -0,33 | -1,25 | 0,12731 | NM_000888        | ---          |
| 8120824 | -0,39 | -1,31 | 0,12312 | -1,08 | -2,11 | 0,01021 | --- RBP7         | ---          |
| 7897522 | -0,39 | -1,31 | 0,38431 | 1,83  | 3,55  | 0,01214 | NM_052960        | NUB1         |
| 8143937 | -0,39 | -1,31 | 0,28237 | 0,54  | 1,46  | 0,06093 | NM_016118        | OPRD1        |
| 7899528 | -0,39 | -1,31 | 0,30144 | -1,19 | -2,28 | 0,04329 | NM_000911        | SCAMP4       |
| 8024347 | -0,39 | -1,31 | 0,12900 | 0,86  | 1,82  | 0,01115 | NM_079834        | NLRP12       |
| 8039096 | -0,39 | -1,31 | 0,33321 | 0,50  | 1,42  | 0,10497 | NM_144687        | LOC100134868 |
| 8061483 | -0,39 | -1,31 | 0,38851 | 0,30  | 1,23  | 0,58929 | NR_004846        | CNTNAP3      |
| 8155359 | -0,39 | -1,31 | 0,09886 | 1,14  | 2,20  | 0,00032 | NM_033655        | ---          |
| 8094439 | -0,39 | -1,31 | 0,17346 | -0,64 | -1,56 | 0,02224 | --- OR5H2        | ---          |
| 8081204 | -0,39 | -1,31 | 0,20014 | -0,48 | -1,40 | 0,01037 | NM_001005482     | C19orf75     |
| 8030813 | -0,39 | -1,31 | 0,45937 | -0,70 | -1,62 | 0,01015 | AK097554 RASL11B | ---          |
| 8095043 | -0,39 | -1,31 | 0,08524 | -1,23 | -2,34 | 0,00371 | NM_023940        | TTC38        |
| 8073842 | -0,39 | -1,31 | 0,15790 | 1,89  | 3,71  | 0,00541 | NM_017931        | ---          |
| 8002245 | -0,39 | -1,31 | 0,61830 | -1,16 | -2,23 | 0,00011 | --- MS4A4A       | ---          |
| 7940237 | -0,39 | -1,31 | 0,00012 | -0,92 | -1,89 | 0,00572 | NM_024021        | RIMBP3       |
| 8074593 | -0,39 | -1,31 | 0,05306 | -0,14 | -1,10 | 0,46964 | NM_015672        | RPL32        |
| 8085407 | -0,39 | -1,31 | 0,00225 | 0,80  | 1,74  | 0,03399 | NM_001007073     | GABBR1       |
| 8124654 | -0,39 | -1,31 | 0,41377 | 1,00  | 2,00  | 0,12692 | NM_001470        | SNORD115-11  |
| 7982028 | -0,39 | -1,31 | 0,69780 | -2,22 | -4,67 | 0,00112 | NR_003303        | SNORD115-11  |
| 7982064 | -0,39 | -1,31 | 0,69780 | -2,22 | -4,67 | 0,00112 | NR_003303        | SNORD115-11  |
| 7982078 | -0,39 | -1,31 | 0,69780 | -2,22 | -4,67 | 0,00112 | NR_003303        | SNORD115-11  |
| 7982092 | -0,39 | -1,31 | 0,69780 | -2,22 | -4,67 | 0,00112 | NR_003303        | WFDC8        |
| 8066549 | -0,39 | -1,31 | 0,14381 | -0,92 | -1,89 | 0,00519 | NM_130896        | ROR2         |
| 8162283 | -0,39 | -1,31 | 0,06472 | -1,35 | -2,55 | 0,02589 | NM_004560        | ---          |
| 8082605 | -0,39 | -1,31 | 0,44740 | -1,29 | -2,45 | 0,06036 | --- PSMB10       | ---          |
| 8002133 | -0,39 | -1,31 | 0,13760 | 0,09  | 1,06  | 0,72946 | NM_002801        | DNAJC14      |
| 7963935 | -0,39 | -1,31 | 0,37669 | 1,83  | 3,55  | 0,00288 | NM_032364        | DNAH10       |
| 7959696 | -0,39 | -1,31 | 0,18248 | -1,06 | -2,08 | 0,00672 | NM_207437        | HHIP         |
| 8097628 | -0,39 | -1,31 | 0,26034 | -1,30 | -2,46 | 0,00371 | NM_022475        | GABBR1       |
| 8179595 | -0,39 | -1,31 | 0,26136 | 1,51  | 2,86  | 0,05994 | NM_001470        | ---          |
| 8140907 | -0,39 | -1,31 | 0,01160 | -1,19 | -2,28 | 0,00264 | --- LHX9         | ---          |
| 7908529 | -0,39 | -1,31 | 0,10497 | -0,89 | -1,86 | 0,11433 | NM_020204        | CDAN1        |
| 7987928 | -0,39 | -1,31 | 0,14279 | 0,49  | 1,40  | 0,12248 | NM_138477        | ---          |
| 8020804 | -0,39 | -1,31 | 0,40218 | -0,78 | -1,72 | 0,01613 | --- SLC6A18      | ---          |
| 8104281 | -0,39 | -1,31 | 0,30725 | -1,47 | -2,77 | 0,00723 | NM_182632        | CLDN8        |
| 8069795 | -0,39 | -1,31 | 0,20373 | -0,90 | -1,87 | 0,08134 | NM_199328        | OLFM1        |
| 8159220 | -0,39 | -1,31 | 0,36805 | -1,30 | -2,47 | 0,04361 | NM_014279        | C7orf43      |
| 8141445 | -0,39 | -1,31 | 0,10127 | 1,17  | 2,25  | 0,03533 | BC015722 ---     | ---          |
| 8107111 | -0,39 | -1,31 | 0,18499 | -1,09 | -2,13 | 0,01251 | --- MYH7         | ---          |
| 7978021 | -0,39 | -1,31 | 0,00463 | -1,00 | -2,01 | 0,00324 | NM_000257        | CTU2         |
| 7997810 | -0,39 | -1,31 | 0,29667 | 0,53  | 1,44  | 0,39136 | NM_001012759     | SMTN         |
| 8075458 | -0,39 | -1,31 | 0,27029 | -1,13 | -2,18 | 0,10120 | NM_134270        | ---          |
| 7932017 | -0,39 | -1,31 | 0,05977 | -0,72 | -1,65 | 0,00285 | --- KDM6B        | ---          |
| 8004671 | -0,39 | -1,31 | 0,22139 | 1,35  | 2,56  | 0,05254 | NM_001080424     | RAPGEFL1     |
| 8007043 | -0,39 | -1,31 | 0,12288 | 1,75  | 3,35  | 0,00303 | NM_016339        | C2orf89      |
| 8053379 | -0,39 | -1,31 | 0,37197 | -0,19 | -1,14 | 0,56913 | AK296608 ---     | ---          |
| 8137044 | -0,39 | -1,31 | 0,28007 | -1,12 | -2,18 | 0,04115 | --- SLC38A11     | ---          |
| 8056363 | -0,39 | -1,31 | 0,09976 | -1,16 | -2,24 | 0,00152 | NM_173512        | DGKZ         |
| 7939657 | -0,39 | -1,31 | 0,50722 | -0,99 | -1,99 | 0,30224 | NM_001105540     | UBD          |
| 8124650 | -0,39 | -1,31 | 0,30071 | -1,87 | -3,66 | 0,00369 | NM_006398        | TAL2         |
| 8157090 | -0,39 | -1,31 | 0,34067 | -0,62 | -1,53 | 0,03942 | NM_005421        | SIPA1L3      |
| 8028286 | -0,39 | -1,31 | 0,35390 | 1,93  | 3,81  | 0,00573 | NM_015073        | SUGT1P1      |
| 8160712 | -0,39 | -1,31 | 0,18817 | 0,70  | 1,63  | 0,10280 | NR_003667        | CAMKV        |
| 8087530 | -0,39 | -1,31 | 0,14974 | -0,34 | -1,27 | 0,23898 | NM_024046        | ZAR1L        |
| 7970887 | -0,39 | -1,31 | 0,14012 | -0,82 | -1,76 | 0,00045 | NM_001136571     | KRT9         |
| 8015357 | -0,39 | -1,31 | 0,42667 | -0,47 | -1,38 | 0,21532 | NM_000226        | HSF5         |
| 8017010 | -0,39 | -1,31 | 0,31946 | -0,81 | -1,75 | 0,01248 | NM_001080439     | WDR81        |
| 8003639 | -0,39 | -1,31 | 0,01125 | 0,45  | 1,36  | 0,42754 | NM_001163809     | FOXK2        |
| 8019521 | -0,39 | -1,31 | 0,22014 | 0,41  | 1,33  | 0,47764 | NM_004514        | AFAP1        |
| 8094030 | -0,39 | -1,31 | 0,03737 | -1,26 | -2,39 | 0,00399 | NM_198595        | NPM2         |
| 8144982 | -0,39 | -1,31 | 0,14330 | -1,40 | -2,64 | 0,01366 | NM_182795        | MGC16384     |
| 7967636 | -0,39 | -1,31 | 0,18228 | -0,24 | -1,18 | 0,29814 | NR_026666        | ---          |
| 8046018 | -0,39 | -1,31 | 0,26164 | -0,62 | -1,53 | 0,29264 | --- NXF5         | ---          |
| 8174105 | -0,39 | -1,31 | 0,26620 | -0,89 | -1,85 | 0,00607 | NR_028089        | KU-MEL-3     |
| 8116707 | -0,39 | -1,31 | 0,03185 | -0,60 | -1,51 | 0,02763 | AY870321 VGLL1   | ---          |
| 8170179 | -0,39 | -1,31 | 0,52200 | -1,71 | -3,27 | 0,00386 | NM_016267        | ANAPC11      |
| 8019687 | -0,39 | -1,31 | 0,36116 | 0,29  | 1,22  | 0,26248 | NM_001002244     | ---          |
| 7956044 | -0,39 | -1,31 | 0,16735 | -0,45 | -1,37 | 0,10581 | --- LLPH         | ---          |
| 7964739 | -0,39 | -1,31 | 0,50405 | -0,19 | -1,14 | 0,67682 | NM_032338        | SCARNA1      |
| 7899392 | -0,39 | -1,31 | 0,10932 | -1,54 | -2,91 | 0,01014 | NR_002997        | SLC6A3       |

|         |       |       |         |       |       |         |              |              |
|---------|-------|-------|---------|-------|-------|---------|--------------|--------------|
| 8110821 | -0,39 | -1,31 | 0,43319 | -0,52 | -1,43 | 0,11253 | NM_001044    | ---          |
| 7951205 | -0,39 | -1,31 | 0,00507 | -1,03 | -2,05 | 0,03042 | ---          | CR2          |
| 7909350 | -0,39 | -1,31 | 0,14128 | 0,30  | 1,23  | 0,37684 | NM_001006658 | PXMP2        |
| 7960117 | -0,39 | -1,31 | 0,29231 | 2,58  | 6,00  | 0,00919 | NM_018663    | COQ7         |
| 7993608 | -0,39 | -1,31 | 0,15006 | 0,56  | 1,48  | 0,23411 | NM_016138    | CHCHD8       |
| 7950294 | -0,39 | -1,31 | 0,03586 | 0,00  | 1,00  | 0,98972 | NM_016565    | OR10G4       |
| 7944797 | -0,39 | -1,31 | 0,29159 | 0,01  | 1,01  | 0,96711 | NM_001004462 | LIPE         |
| 8037186 | -0,39 | -1,31 | 0,33671 | -0,82 | -1,77 | 0,13981 | NM_005357    | FOXO3        |
| 8121365 | -0,39 | -1,31 | 0,63677 | -2,41 | -5,32 | 0,00291 | NM_001455    | BRS3         |
| 8170159 | -0,39 | -1,31 | 0,10757 | -0,86 | -1,82 | 0,00264 | NM_001727    | KRT17        |
| 8005449 | -0,39 | -1,31 | 0,30034 | -0,77 | -1,71 | 0,01176 | NM_000422    | ITGA7        |
| 7963880 | -0,39 | -1,31 | 0,40166 | -0,77 | -1,71 | 0,13473 | NM_001144996 | OLFML2A      |
| 8157804 | -0,39 | -1,31 | 0,49067 | -0,84 | -1,78 | 0,01125 | NM_182487    | IFNG         |
| 7964787 | -0,39 | -1,31 | 0,03851 | -0,36 | -1,29 | 0,17825 | NM_000619    | ---          |
| 7983979 | -0,39 | -1,31 | 0,13147 | -0,35 | -1,27 | 0,08835 | ---          | ---          |
| 8090660 | -0,39 | -1,31 | 0,13214 | -0,62 | -1,53 | 0,09116 | ---          | PARVB        |
| 8073662 | -0,39 | -1,31 | 0,30078 | 0,05  | 1,04  | 0,86259 | NM_001003828 | AGAP4        |
| 7933252 | -0,39 | -1,31 | 0,51861 | 2,01  | 4,02  | 0,00022 | NM_133446    | LRRC14       |
| 8148923 | -0,39 | -1,31 | 0,43576 | 0,38  | 1,30  | 0,28828 | NM_014665    | OR9G1        |
| 7939994 | -0,39 | -1,31 | 0,55348 | -2,13 | -4,37 | 0,00007 | NM_001005213 | NDUFS8       |
| 7941976 | -0,39 | -1,31 | 0,39284 | 0,55  | 1,47  | 0,19304 | NM_002496    | ADCYAP1R1    |
| 8132151 | -0,39 | -1,31 | 0,18569 | -1,60 | -3,04 | 0,02270 | NM_001118    | SCARNA4      |
| 7920875 | -0,39 | -1,31 | 0,56055 | -0,21 | -1,16 | 0,62732 | NR_003005    | ---          |
| 8104731 | -0,39 | -1,31 | 0,28309 | -1,34 | -2,54 | 0,00896 | ---          | ---          |
| 8023462 | -0,39 | -1,31 | 0,62468 | -1,36 | -2,56 | 0,03435 | ---          | SLN          |
| 7951479 | -0,39 | -1,31 | 0,12052 | -0,84 | -1,79 | 0,04797 | NM_003063    | ---          |
| 8157580 | -0,39 | -1,31 | 0,12240 | -0,94 | -1,92 | 0,00812 | ---          | STGC3        |
| 8079740 | -0,39 | -1,31 | 0,13616 | -0,86 | -1,81 | 0,13764 | AY078383     | TUBB3        |
| 7998063 | -0,39 | -1,31 | 0,31367 | 0,67  | 1,59  | 0,39495 | NM_006086    | BPESC1       |
| 8083025 | -0,39 | -1,31 | 0,24666 | -1,16 | -2,24 | 0,00995 | NR_026783    | ---          |
| 8017597 | -0,39 | -1,31 | 0,43246 | -1,43 | -2,69 | 0,00080 | ---          | TAF4         |
| 8067361 | -0,39 | -1,31 | 0,43800 | 0,43  | 1,35  | 0,33776 | NM_003185    | CD1B         |
| 7921346 | -0,39 | -1,31 | 0,27459 | -1,93 | -3,81 | 0,00001 | NM_001764    | OR4C13       |
| 7939900 | -0,39 | -1,31 | 0,71992 | -1,43 | -2,70 | 0,00526 | NM_001001955 | GH2          |
| 8017480 | -0,40 | -1,31 | 0,33239 | -0,82 | -1,77 | 0,01161 | NM_022557    | DDX51        |
| 7967711 | -0,40 | -1,32 | 0,18340 | -0,73 | -1,66 | 0,24475 | NM_175066    | ADORA1       |
| 7908907 | -0,40 | -1,32 | 0,18059 | -0,28 | -1,21 | 0,42624 | NM_000674    | SNAI1        |
| 8063382 | -0,40 | -1,32 | 0,12253 | 0,80  | 1,75  | 0,25530 | NM_005985    | VSNL1        |
| 8040430 | -0,40 | -1,32 | 0,19436 | -1,34 | -2,54 | 0,00911 | NM_003385    | CEBPZ        |
| 8051528 | -0,40 | -1,32 | 0,09616 | 0,15  | 1,11  | 0,44992 | NM_005760    | LPIN3        |
| 8062658 | -0,40 | -1,32 | 0,01082 | -0,50 | -1,42 | 0,11784 | NM_022896    | IGFBP1       |
| 8008151 | -0,40 | -1,32 | 0,38356 | -0,78 | -1,72 | 0,00039 | NM_006546    | LOC642947    |
| 8156022 | -0,40 | -1,32 | 0,39692 | -0,87 | -1,82 | 0,22422 | AK129705     | GABBR1       |
| 8178298 | -0,40 | -1,32 | 0,27228 | 1,41  | 2,65  | 0,06593 | NM_001470    | DEFA6        |
| 8149104 | -0,40 | -1,32 | 0,24144 | -1,83 | -3,56 | 0,01292 | NM_001926    | ---          |
| 7938625 | -0,40 | -1,32 | 0,33457 | -0,76 | -1,69 | 0,01902 | ---          | PIGL         |
| 8005157 | -0,40 | -1,32 | 0,01852 | 0,35  | 1,27  | 0,31014 | NM_004278    | CLDN18       |
| 8082928 | -0,40 | -1,32 | 0,29600 | -1,82 | -3,53 | 0,00140 | NM_001002026 | LOC100128818 |
| 8076815 | -0,40 | -1,32 | 0,57402 | -1,74 | -3,33 | 0,02219 | AY358194     | ---          |
| 8092931 | -0,40 | -1,32 | 0,51439 | -1,28 | -2,43 | 0,10015 | ---          | C1orf158     |
| 7897966 | -0,40 | -1,32 | 0,00053 | -1,16 | -2,23 | 0,02639 | NM_152290    | LRRC7        |
| 7902235 | -0,40 | -1,32 | 0,13561 | -1,55 | -2,93 | 0,00172 | NM_020794    | ---          |
| 8113707 | -0,40 | -1,32 | 0,22848 | -1,15 | -2,22 | 0,01987 | ---          | LOC100128644 |
| 8085429 | -0,40 | -1,32 | 0,43142 | -1,01 | -2,02 | 0,00346 | AY358240     | PKP2         |
| 7962212 | -0,40 | -1,32 | 0,41357 | 3,31  | 9,95  | 0,00001 | NM_004572    | ---          |
| 8096873 | -0,40 | -1,32 | 0,05785 | -1,02 | -2,02 | 0,05553 | ---          | KCNK6        |
| 8028332 | -0,40 | -1,32 | 0,52219 | -0,33 | -1,26 | 0,30617 | NM_004823    | ---          |
| 7979811 | -0,40 | -1,32 | 0,63917 | -1,87 | -3,67 | 0,10387 | ---          | TMEM8C       |
| 8164931 | -0,40 | -1,32 | 0,22174 | -1,66 | -3,17 | 0,00580 | NM_001080483 | ---          |
| 8090505 | -0,40 | -1,32 | 0,15122 | -0,69 | -1,61 | 0,00048 | ---          | ---          |
| 7979572 | -0,40 | -1,32 | 0,20284 | -1,54 | -2,91 | 0,07192 | ---          | ASAH2        |
| 7933341 | -0,40 | -1,32 | 0,21217 | -0,23 | -1,17 | 0,53349 | NM_019893    | ETAA1        |
| 8042373 | -0,40 | -1,32 | 0,12315 | 0,32  | 1,25  | 0,23653 | NM_019002    | FAM69C       |
| 8023864 | -0,40 | -1,32 | 0,03523 | -0,85 | -1,81 | 0,03084 | NM_001044369 | CNR1         |
| 8128043 | -0,40 | -1,32 | 0,10745 | -1,08 | -2,12 | 0,00239 | NM_016083    | RAI1         |
| 8005267 | -0,40 | -1,32 | 0,00313 | -0,35 | -1,27 | 0,40907 | NM_030665    | GOLGA2B      |
| 7965746 | -0,40 | -1,32 | 0,23453 | -0,54 | -1,46 | 0,05908 | NM_017600    | LOC399898    |
| 7940116 | -0,40 | -1,32 | 0,29188 | -0,78 | -1,72 | 0,17446 | AK128188     | HSP90AA5P    |
| 8084299 | -0,40 | -1,32 | 0,42622 | 0,01  | 1,01  | 0,92672 | AY956761     | ---          |
| 8165864 | -0,40 | -1,32 | 0,06883 | -1,33 | -2,52 | 0,01321 | ---          | SNORD103A    |
| 7914322 | -0,40 | -1,32 | 0,23317 | -1,11 | -2,16 | 0,06416 | NR_004054    | SNORD103A    |
| 7914324 | -0,40 | -1,32 | 0,23317 | -1,11 | -2,16 | 0,06416 | NR_004054    | ZNF165       |
| 8117630 | -0,40 | -1,32 | 0,18861 | 1,04  | 2,06  | 0,15918 | NM_003447    | OR2A11       |

|         |       |       |         |       |       |         |                 |              |
|---------|-------|-------|---------|-------|-------|---------|-----------------|--------------|
| 7911235 | -0,40 | -1,32 | 0,26697 | -1,14 | -2,21 | 0,12857 | ENST00000318244 | JDP2         |
| 7975787 | -0,40 | -1,32 | 0,25439 | -0,12 | -1,09 | 0,66916 | NM_001135049    | TMEM132B     |
| 7959807 | -0,40 | -1,32 | 0,38192 | -1,20 | -2,30 | 0,00235 | NM_052907       | ZFP41        |
| 8148597 | -0,40 | -1,32 | 0,36858 | -0,59 | -1,50 | 0,21467 | NM_173832       | SPATA22      |
| 8011343 | -0,40 | -1,32 | 0,25102 | -0,78 | -1,72 | 0,00068 | NM_032598       | SPRR2A       |
| 7920205 | -0,40 | -1,32 | 0,28664 | -2,05 | -4,13 | 0,01973 | NM_005988       | C6orf226     |
| 8126446 | -0,40 | -1,32 | 0,02981 | -0,77 | -1,71 | 0,18630 | NM_001008739    | TRPM3        |
| 8161654 | -0,40 | -1,32 | 0,07599 | -0,89 | -1,86 | 0,00000 | NM_206946       | IFNA4        |
| 8160377 | -0,40 | -1,32 | 0,32034 | -1,42 | -2,68 | 0,00145 | NM_021068       | JAKMIP2      |
| 8114938 | -0,40 | -1,32 | 0,21967 | -0,94 | -1,91 | 0,01733 | NM_014790       | RAD21L1      |
| 8060395 | -0,40 | -1,32 | 0,32995 | -0,75 | -1,68 | 0,03218 | NM_001136566    | KCNK16       |
| 8126173 | -0,40 | -1,32 | 0,19391 | -1,23 | -2,35 | 0,00091 | NM_001135105    | LRP1B        |
| 8055496 | -0,40 | -1,32 | 0,11104 | -0,60 | -1,51 | 0,00150 | NM_018557       | KLRF1        |
| 7953892 | -0,40 | -1,32 | 0,12786 | 1,67  | 3,18  | 0,11293 | NM_016523       | SIGLEC6      |
| 8038861 | -0,40 | -1,32 | 0,46008 | -0,72 | -1,65 | 0,04231 | NM_001245       | HMGB3L1      |
| 8065795 | -0,40 | -1,32 | 0,20368 | -1,29 | -2,44 | 0,02256 | NR_002165       | PNMAL1       |
| 8037767 | -0,40 | -1,32 | 0,22304 | -1,01 | -2,01 | 0,00656 | NM_018215       | FLJ00290     |
| 8148978 | -0,40 | -1,32 | 0,20231 | -0,55 | -1,47 | 0,19028 | AK090404 ---    |              |
| 7906467 | -0,40 | -1,32 | 0,25082 | -0,79 | -1,73 | 0,12469 | --- CD40        |              |
| 8063156 | -0,40 | -1,32 | 0,19455 | -0,13 | -1,09 | 0,58096 | NM_001250       | RTL1         |
| 7981322 | -0,40 | -1,32 | 0,22737 | -0,81 | -1,75 | 0,09863 | NM_001134888    | HIP1         |
| 8140319 | -0,40 | -1,32 | 0,02309 | 0,92  | 1,90  | 0,05064 | NM_005338       | CRYBA4       |
| 8072124 | -0,40 | -1,32 | 0,49838 | -0,86 | -1,81 | 0,13747 | NM_001886       | AP1B1        |
| 8075217 | -0,40 | -1,32 | 0,10471 | 1,86  | 3,64  | 0,00666 | NM_001127       | MIR106A      |
| 8175252 | -0,40 | -1,32 | 0,01651 | -0,75 | -1,68 | 0,00112 | NR_029523       | ---          |
| 7932608 | -0,40 | -1,32 | 0,03540 | -1,34 | -2,52 | 0,00852 | --- OR2T29      |              |
| 7925747 | -0,40 | -1,32 | 0,09526 | -0,94 | -1,91 | 0,10344 | NM_001004694    | PCDH15       |
| 7933672 | -0,40 | -1,32 | 0,16112 | -0,76 | -1,69 | 0,00971 | NM_001142763    | HOXC6        |
| 7955873 | -0,40 | -1,32 | 0,18227 | -0,14 | -1,10 | 0,60626 | NM_004503       | PLCB3        |
| 7940924 | -0,40 | -1,32 | 0,15585 | 1,59  | 3,02  | 0,02381 | NM_000932       | PTPRU        |
| 7899562 | -0,40 | -1,32 | 0,41527 | 1,11  | 2,15  | 0,04308 | NM_133178       | ---          |
| 8122969 | -0,40 | -1,32 | 0,07014 | -1,00 | -2,00 | 0,10284 | --- KCNE2       |              |
| 8068369 | -0,40 | -1,32 | 0,24818 | -0,67 | -1,59 | 0,03096 | NM_172201       | C3orf43      |
| 8093137 | -0,40 | -1,32 | 0,24024 | -0,96 | -1,95 | 0,02179 | NM_001077657    | PELP1        |
| 8011692 | -0,40 | -1,32 | 0,22217 | 0,11  | 1,08  | 0,85979 | NM_014389       | ENPP2        |
| 8152522 | -0,40 | -1,32 | 0,34402 | 0,87  | 1,83  | 0,05810 | NM_006209       | LOC100131217 |
| 8036862 | -0,40 | -1,32 | 0,13711 | -0,77 | -1,71 | 0,06899 | AY358191 ---    |              |
| 7942551 | -0,40 | -1,32 | 0,05914 | -0,26 | -1,19 | 0,17911 | --- ---         |              |
| 7918424 | -0,40 | -1,32 | 0,15154 | -1,35 | -2,55 | 0,03365 | --- CAMP        |              |
| 8079590 | -0,40 | -1,32 | 0,29352 | -0,51 | -1,42 | 0,04512 | NM_004345       | ---          |
| 8083850 | -0,40 | -1,32 | 0,28379 | -0,11 | -1,08 | 0,83659 | --- S100A14     |              |
| 7920297 | -0,40 | -1,32 | 0,03428 | -0,24 | -1,18 | 0,35966 | NM_020672       | SPDYE4       |
| 8012528 | -0,40 | -1,32 | 0,43240 | -1,90 | -3,72 | 0,00027 | NM_001128076    | ANKRD37      |
| 8098604 | -0,40 | -1,32 | 0,21308 | -1,01 | -2,02 | 0,11688 | NM_181726       | C11orf41     |
| 7939215 | -0,40 | -1,32 | 0,37619 | 0,29  | 1,23  | 0,45538 | NM_012194       | BET3L        |
| 8129105 | -0,40 | -1,32 | 0,26392 | -0,99 | -1,99 | 0,07088 | NM_001139444    | CXorf58      |
| 8166481 | -0,40 | -1,32 | 0,24164 | -0,73 | -1,66 | 0,01219 | NM_152761       | SF1          |
| 7949146 | -0,40 | -1,32 | 0,10519 | 0,04  | 1,03  | 0,79177 | NM_004630       | ---          |
| 7917695 | -0,40 | -1,32 | 0,19556 | -0,78 | -1,72 | 0,00409 | --- ADAMTS4     |              |
| 7921821 | -0,40 | -1,32 | 0,16076 | -1,35 | -2,55 | 0,10343 | NM_005099       | ADAM28       |
| 8145293 | -0,40 | -1,32 | 0,09683 | -0,96 | -1,95 | 0,00305 | NM_014265       | CCDC90B      |
| 7950753 | -0,40 | -1,32 | 0,13360 | 1,14  | 2,20  | 0,00873 | NM_021825       | ZNF821       |
| 8002618 | -0,40 | -1,32 | 0,00189 | -0,13 | -1,10 | 0,64613 | NM_017530       | OR7G2        |
| 8033734 | -0,40 | -1,32 | 0,36396 | -0,83 | -1,78 | 0,00032 | NM_001005193    | CRISP3       |
| 8126905 | -0,40 | -1,32 | 0,25581 | -0,92 | -1,89 | 0,05322 | NM_006061       | ---          |
| 8111991 | -0,40 | -1,32 | 0,26817 | -1,02 | -2,02 | 0,01755 | --- GALR2       |              |
| 8010030 | -0,40 | -1,32 | 0,25344 | -0,93 | -1,90 | 0,19914 | NM_003857       | SAA4         |
| 7946977 | -0,40 | -1,32 | 0,27979 | -0,35 | -1,27 | 0,26632 | NM_006512       | ZNF556       |
| 8024527 | -0,40 | -1,32 | 0,23234 | -0,91 | -1,88 | 0,00097 | NM_024967       | FBXO40       |
| 8081997 | -0,40 | -1,32 | 0,10486 | -0,66 | -1,58 | 0,03552 | NM_016298       | ---          |
| 7900197 | -0,40 | -1,32 | 0,52617 | -0,70 | -1,63 | 0,03816 | --- UFM1        |              |
| 7971124 | -0,40 | -1,32 | 0,34431 | -0,44 | -1,36 | 0,09445 | NM_016617       | TMEM59L      |
| 8027040 | -0,40 | -1,32 | 0,45914 | -0,25 | -1,19 | 0,57361 | NM_012109       | C1orf230     |
| 7905464 | -0,41 | -1,32 | 0,15885 | -0,46 | -1,37 | 0,11396 | NM_001144956    | C9orf117     |
| 8158081 | -0,41 | -1,32 | 0,30187 | -0,95 | -1,93 | 0,00115 | BC141809 ---    |              |
| 7986637 | -0,41 | -1,32 | 0,32087 | -2,98 | -7,88 | 0,02018 | --- SALL3       |              |
| 8021826 | -0,41 | -1,32 | 0,49425 | -1,70 | -3,25 | 0,00641 | NM_171999       | U2AF1L4      |
| 8036143 | -0,41 | -1,32 | 0,41062 | 1,85  | 3,62  | 0,07090 | NM_001040425    | SYNE2        |
| 7974920 | -0,41 | -1,32 | 0,01555 | 1,89  | 3,71  | 0,02401 | NM_182914       | MPP2         |
| 8015868 | -0,41 | -1,32 | 0,11351 | 0,82  | 1,77  | 0,03948 | NM_005374       | TOMM20L      |
| 7974647 | -0,41 | -1,33 | 0,00278 | 0,20  | 1,15  | 0,17635 | NM_207377       | MEGF10       |
| 8107722 | -0,41 | -1,33 | 0,28184 | -1,32 | -2,51 | 0,01404 | NM_032446       | LOC284023    |
| 8012282 | -0,41 | -1,33 | 0,41966 | 0,09  | 1,07  | 0,55022 | NR_024349       | ---          |

|         |       |       |         |       |       |         |                 |              |  |
|---------|-------|-------|---------|-------|-------|---------|-----------------|--------------|--|
| 7976808 | -0,41 | -1,33 | 0,32494 | -0,72 | -1,65 | 0,07943 | ---             | AUTS2        |  |
| 8133233 | -0,41 | -1,33 | 0,04075 | -0,86 | -1,82 | 0,00784 | NM_015570       | BTBD12       |  |
| 7999008 | -0,41 | -1,33 | 0,09974 | 0,85  | 1,80  | 0,04628 | NM_032444       | ---          |  |
| 8117077 | -0,41 | -1,33 | 0,04003 | -0,95 | -1,93 | 0,05579 | ---             | MAGEB18      |  |
| 8166565 | -0,41 | -1,33 | 0,16044 | -1,02 | -2,03 | 0,00141 | NM_173699       | SNORD115-35  |  |
| 7982076 | -0,41 | -1,33 | 0,19509 | -0,72 | -1,64 | 0,02627 | NR_003350       | ---          |  |
| 8143207 | -0,41 | -1,33 | 0,02110 | -0,86 | -1,81 | 0,00950 | ---             | ---          |  |
| 7915565 | -0,41 | -1,33 | 0,10310 | -1,52 | -2,86 | 0,01845 | ---             | MUC19        |  |
| 7954864 | -0,41 | -1,33 | 0,14735 | -0,97 | -1,96 | 0,05669 | AK093065        | DMPK         |  |
| 8037657 | -0,41 | -1,33 | 0,04848 | 0,73  | 1,66  | 0,20480 | NM_004409       | LOC100288814 |  |
| 8165945 | -0,41 | -1,33 | 0,26234 | -1,45 | -2,74 | 0,00003 | ENST00000445307 | TRMT1        |  |
| 8034615 | -0,41 | -1,33 | 0,33880 | 0,34  | 1,27  | 0,27517 | NM_017722       | LOC401410    |  |
| 8143437 | -0,41 | -1,33 | 0,16528 | -1,79 | -3,45 | 0,10277 | BX648692        | FLJ45832     |  |
| 8065547 | -0,41 | -1,33 | 0,00460 | -0,69 | -1,62 | 0,00077 | AK127732        | OPTC         |  |
| 7908931 | -0,41 | -1,33 | 0,40731 | -1,38 | -2,59 | 0,02191 | NM_014359       | TMEM26       |  |
| 7933842 | -0,41 | -1,33 | 0,26527 | -1,24 | -2,37 | 0,00001 | NM_178505       | RABEPK       |  |
| 8157843 | -0,41 | -1,33 | 0,19830 | 0,98  | 1,97  | 0,00808 | NM_005833       | FLJ11710     |  |
| 8008700 | -0,41 | -1,33 | 0,39045 | -0,75 | -1,69 | 0,04313 | AK021772        | KRT34        |  |
| 8015268 | -0,41 | -1,33 | 0,44713 | -0,69 | -1,61 | 0,26178 | NM_021013       | SLC5A12      |  |
| 7947165 | -0,41 | -1,33 | 0,02019 | -1,25 | -2,38 | 0,00001 | NM_178498       | TRIM14       |  |
| 8162729 | -0,41 | -1,33 | 0,52054 | 1,09  | 2,12  | 0,00663 | NM_014788       | CCDC121      |  |
| 8051197 | -0,41 | -1,33 | 0,63208 | -0,83 | -1,77 | 0,27331 | NM_024584       | ---          |  |
| 7988438 | -0,41 | -1,33 | 0,01670 | -0,98 | -1,97 | 0,04310 | ---             | KBTBD7       |  |
| 7971218 | -0,41 | -1,33 | 0,01942 | 0,06  | 1,04  | 0,87178 | NM_032138       | ADAMTSL4     |  |
| 7919743 | -0,41 | -1,33 | 0,29802 | -0,28 | -1,22 | 0,31402 | NM_019032       | BBS12        |  |
| 8097252 | -0,41 | -1,33 | 0,30925 | -0,53 | -1,44 | 0,03962 | NM_001178007    | CBR3         |  |
| 8068413 | -0,41 | -1,33 | 0,17977 | -0,31 | -1,24 | 0,56340 | NM_001236       | ---          |  |
| 7965787 | -0,41 | -1,33 | 0,04049 | -0,50 | -1,42 | 0,04078 | ---             | RPS20P27     |  |
| 7950626 | -0,41 | -1,33 | 0,23684 | 0,54  | 1,45  | 0,10931 | BC071734        | CD27         |  |
| 7953333 | -0,41 | -1,33 | 0,33988 | -0,73 | -1,66 | 0,00596 | NM_001242       | RFXAP        |  |
| 7968653 | -0,41 | -1,33 | 0,22819 | -0,44 | -1,36 | 0,00253 | NM_000538       | ZNF664       |  |
| 7959751 | -0,41 | -1,33 | 0,18925 | 0,54  | 1,45  | 0,05224 | NM_152437       | SCN2B        |  |
| 7952011 | -0,41 | -1,33 | 0,34842 | -1,67 | -3,18 | 0,00949 | NM_004588       | ---          |  |
| 7938055 | -0,41 | -1,33 | 0,20083 | -1,21 | -2,31 | 0,01076 | ---             | CCDC62       |  |
| 7959484 | -0,41 | -1,33 | 0,18861 | -1,24 | -2,36 | 0,07317 | NM_201435       | IMPDH1       |  |
| 8142795 | -0,41 | -1,33 | 0,35224 | 0,21  | 1,16  | 0,10501 | NM_000883       | CROCC2       |  |
| 7912784 | -0,41 | -1,33 | 0,06463 | -0,20 | -1,15 | 0,31084 | NR_023386       | PIM1         |  |
| 8119161 | -0,41 | -1,33 | 0,23745 | 0,56  | 1,47  | 0,22187 | NM_002648       | CLCN4        |  |
| 8165974 | -0,41 | -1,33 | 0,18225 | 0,57  | 1,49  | 0,02920 | NM_001830       | EGLN2        |  |
| 8028940 | -0,41 | -1,33 | 0,17694 | -0,18 | -1,13 | 0,34081 | NM_080732       | ---          |  |
| 8170362 | -0,41 | -1,33 | 0,45551 | -0,64 | -1,55 | 0,13598 | ---             | SNX21        |  |
| 8063057 | -0,41 | -1,33 | 0,01713 | -0,67 | -1,60 | 0,08168 | NM_033421       | ANKRD13D     |  |
| 7941822 | -0,41 | -1,33 | 0,16626 | 1,09  | 2,13  | 0,04412 | NR_030767       | ANKRD23      |  |
| 8053984 | -0,41 | -1,33 | 0,23408 | -0,43 | -1,35 | 0,28897 | NM_144994       | NEURL2       |  |
| 8066612 | -0,41 | -1,33 | 0,24806 | -0,15 | -1,11 | 0,52660 | NM_080749       | SORL1        |  |
| 7944667 | -0,41 | -1,33 | 0,00937 | 1,24  | 2,35  | 0,00564 | NM_003105       | NFATC2       |  |
| 8067040 | -0,41 | -1,33 | 0,29710 | 1,97  | 3,93  | 0,00196 | NM_012340       | RAG1         |  |
| 7939398 | -0,41 | -1,33 | 0,31945 | -0,59 | -1,50 | 0,05541 | NM_000448       | SPATA19      |  |
| 7952797 | -0,41 | -1,33 | 0,20883 | -1,36 | -2,57 | 0,00075 | NM_174927       | ---          |  |
| 7928870 | -0,41 | -1,33 | 0,35101 | -1,01 | -2,01 | 0,01674 | ---             | MLANA        |  |
| 8154285 | -0,41 | -1,33 | 0,23082 | -1,06 | -2,09 | 0,00383 | NM_005511       | CPXCR1       |  |
| 8168638 | -0,41 | -1,33 | 0,04414 | -1,09 | -2,12 | 0,00532 | NM_033048       | ---          |  |
| 8097690 | -0,41 | -1,33 | 0,28075 | -0,87 | -1,83 | 0,00028 | ---             | OR7E35P      |  |
| 8094154 | -0,41 | -1,33 | 0,48177 | -0,85 | -1,80 | 0,03207 | AF073924        | PRMT7        |  |
| 7996785 | -0,41 | -1,33 | 0,17232 | 0,50  | 1,42  | 0,14583 | NM_019023       | FOLH1        |  |
| 7948058 | -0,41 | -1,33 | 0,09995 | -1,22 | -2,32 | 0,00074 | NM_004476       | ---          |  |
| 8116954 | -0,41 | -1,33 | 0,03217 | -0,88 | -1,84 | 0,00336 | ---             | LOC100129345 |  |
| 7981237 | -0,41 | -1,33 | 0,01701 | -1,13 | -2,18 | 0,08021 | ENST00000355909 | ---          |  |
| 8129454 | -0,41 | -1,33 | 0,73288 | -2,40 | -5,29 | 0,00631 | ---             | LAMP3        |  |
| 8092348 | -0,41 | -1,33 | 0,31064 | 2,50  | 5,65  | 0,00151 | NM_014398       | SLC9A3R2     |  |
| 7992463 | -0,41 | -1,33 | 0,04516 | -0,05 | -1,04 | 0,89142 | NM_001130012    | ZNF778       |  |
| 7997896 | -0,41 | -1,33 | 0,32062 | 1,45  | 2,73  | 0,01855 | NM_182531       | ---          |  |
| 8132243 | -0,41 | -1,33 | 0,00969 | -0,40 | -1,32 | 0,13000 | ---             | VWA3B        |  |
| 8043747 | -0,41 | -1,33 | 0,06580 | -0,91 | -1,87 | 0,00467 | NM_144992       | LOC440792    |  |
| 8071357 | -0,41 | -1,33 | 0,32982 | -1,42 | -2,67 | 0,03448 | AB051440        | FAM55D       |  |
| 7951796 | -0,41 | -1,33 | 0,15991 | -0,67 | -1,59 | 0,04229 | NM_001077639    | UBXN2A       |  |
| 8040503 | -0,41 | -1,33 | 0,02912 | 0,61  | 1,52  | 0,03409 | NM_181713       | 10. Mrz      |  |
| 8017365 | -0,41 | -1,33 | 0,17128 | -0,50 | -1,42 | 0,08263 | NM_152598       | ---          |  |
| 8102726 | -0,41 | -1,33 | 0,23952 | -1,11 | -2,16 | 0,00670 | ---             | ---          |  |
| 7923965 | -0,41 | -1,33 | 0,08468 | -0,44 | -1,36 | 0,31922 | ---             | LSMD1        |  |
| 8012274 | -0,41 | -1,33 | 0,50572 | 0,56  | 1,48  | 0,16128 | NM_032356       | ENPP3        |  |
| 8122071 | -0,41 | -1,33 | 0,13082 | 0,45  | 1,36  | 0,05173 | NM_005021       | BTN2A2       |  |
| 8117447 | -0,41 | -1,33 | 0,13688 | -0,27 | -1,20 | 0,32652 | NM_006995       | NAPRT1       |  |

|         |       |       |         |       |       |         |                 |              |
|---------|-------|-------|---------|-------|-------|---------|-----------------|--------------|
| 8153430 | -0,41 | -1,33 | 0,21276 | 1,24  | 2,37  | 0,13511 | NM_145201       | ---          |
| 8017096 | -0,41 | -1,33 | 0,10257 | -0,78 | -1,72 | 0,00169 | ---             | IFFO1        |
| 7960559 | -0,41 | -1,33 | 0,29784 | -0,98 | -1,98 | 0,00102 | NM_080730       | OR1J2        |
| 8157668 | -0,41 | -1,33 | 0,41570 | -0,89 | -1,85 | 0,00828 | NM_054107       | SNORA56      |
| 8170992 | -0,41 | -1,33 | 0,31247 | -0,92 | -1,90 | 0,14610 | NR_002984       | TAB1         |
| 8073114 | -0,41 | -1,33 | 0,10675 | 0,27  | 1,21  | 0,16324 | NM_006116       | ZNF365       |
| 7927747 | -0,41 | -1,33 | 0,06765 | -0,90 | -1,87 | 0,00007 | NM_014951       | RNU5B-1      |
| 7984259 | -0,41 | -1,33 | 0,45103 | -0,90 | -1,86 | 0,13849 | NR_002757       | LCN1         |
| 8159255 | -0,41 | -1,33 | 0,59204 | -1,91 | -3,75 | 0,00082 | NM_002297       | CXorf42      |
| 8174761 | -0,41 | -1,33 | 0,25010 | -0,75 | -1,68 | 0,00378 | NR_027131       | CCDC147      |
| 7930320 | -0,41 | -1,33 | 0,26202 | -0,74 | -1,67 | 0,06037 | NM_001008723    | COG8         |
| 8002272 | -0,41 | -1,33 | 0,31399 | 0,22  | 1,17  | 0,73815 | NM_032382       | FLJ45949     |
| 8030964 | -0,41 | -1,33 | 0,14157 | -1,41 | -2,66 | 0,00036 | AK127846 LYZL1  |              |
| 7926889 | -0,41 | -1,33 | 0,69962 | -0,36 | -1,28 | 0,30793 | NM_032517       | ACCN5        |
| 8103378 | -0,41 | -1,33 | 0,11359 | -0,53 | -1,44 | 0,06404 | NM_017419       | MUC21        |
| 8177931 | -0,41 | -1,33 | 0,53886 | -1,56 | -2,95 | 0,00024 | NM_001010909    | SNORD77      |
| 7922412 | -0,41 | -1,33 | 0,39457 | -0,66 | -1,58 | 0,01149 | NR_003943       | ---          |
| 8071655 | -0,41 | -1,33 | 0,45193 | -0,87 | -1,83 | 0,21629 | ---             | CCDC67       |
| 7943103 | -0,41 | -1,33 | 0,00396 | -0,69 | -1,62 | 0,07521 | NM_181645       | CSRNP1       |
| 8086330 | -0,41 | -1,33 | 0,04306 | -0,57 | -1,48 | 0,09077 | NM_033027       | ---          |
| 8101224 | -0,41 | -1,33 | 0,25080 | -0,40 | -1,32 | 0,50498 | ---             | CD1C         |
| 7906348 | -0,41 | -1,33 | 0,28061 | -1,24 | -2,37 | 0,00530 | NM_001765       | SNORD115-11  |
| 7982050 | -0,42 | -1,33 | 0,67068 | -1,88 | -3,69 | 0,00111 | NR_003303       | TMEM115      |
| 8087685 | -0,42 | -1,33 | 0,45319 | 2,46  | 5,49  | 0,05300 | NM_007024       | EPM2A        |
| 8130013 | -0,42 | -1,33 | 0,24274 | -0,17 | -1,12 | 0,15027 | LMN_005670      | LMNB2        |
| 8032491 | -0,42 | -1,33 | 0,32315 | 2,00  | 4,01  | 0,03068 | NM_032737       | APITD1       |
| 7897632 | -0,42 | -1,33 | 0,22789 | -0,30 | -1,23 | 0,22754 | NM_198544       | ZNF671       |
| 8039680 | -0,42 | -1,33 | 0,24013 | -0,44 | -1,36 | 0,34569 | NM_024833       | ---          |
| 7957604 | -0,42 | -1,33 | 0,37671 | -0,29 | -1,22 | 0,62241 | ---             | CBX7         |
| 8076185 | -0,42 | -1,33 | 0,09465 | 1,78  | 3,42  | 0,01022 | NM_175709       | VMAC         |
| 8025000 | -0,42 | -1,33 | 0,03392 | 0,02  | 1,01  | 0,92930 | NM_001017921    | GTF3C1       |
| 8000425 | -0,42 | -1,33 | 0,13596 | 1,59  | 3,00  | 0,00459 | NM_001520       | TAS2R20      |
| 7961285 | -0,42 | -1,33 | 0,14192 | -0,27 | -1,21 | 0,01511 | NM_176889       | ---          |
| 8098902 | -0,42 | -1,33 | 0,60281 | -0,55 | -1,47 | 0,10635 | ---             | INSC         |
| 7938652 | -0,42 | -1,33 | 0,32142 | -0,63 | -1,55 | 0,02399 | NM_001031853    | ---          |
| 8129835 | -0,42 | -1,33 | 0,22408 | -0,94 | -1,92 | 0,04782 | ---             | CFD          |
| 8024062 | -0,42 | -1,33 | 0,31624 | 0,88  | 1,85  | 0,07924 | NM_001928       | IL1RL1       |
| 8044021 | -0,42 | -1,34 | 0,05852 | 0,47  | 1,39  | 0,12106 | NM_016232       | OR10A3       |
| 7946332 | -0,42 | -1,34 | 0,15379 | -0,91 | -1,87 | 0,02926 | NM_001003745    | ---          |
| 7932548 | -0,42 | -1,34 | 0,10841 | -0,94 | -1,91 | 0,00809 | ---             | EIF4E        |
| 8101839 | -0,42 | -1,34 | 0,21311 | -0,40 | -1,32 | 0,24363 | NM_001968       | FXYD6        |
| 7951977 | -0,42 | -1,34 | 0,45573 | 0,49  | 1,40  | 0,25260 | NM_001164836    | SLC15A5      |
| 7961571 | -0,42 | -1,34 | 0,14284 | -1,04 | -2,06 | 0,02915 | NM_001170798    | NLRP7        |
| 8039280 | -0,42 | -1,34 | 0,14983 | -0,85 | -1,81 | 0,05662 | NM_001127255    | ACACB        |
| 7958466 | -0,42 | -1,34 | 0,03479 | 1,05  | 2,07  | 0,00473 | NM_001093       | ---          |
| 7943317 | -0,42 | -1,34 | 0,23844 | -0,35 | -1,27 | 0,06345 | ---             | EMR1         |
| 8025103 | -0,42 | -1,34 | 0,20146 | -1,02 | -2,03 | 0,00002 | NM_001974       | ---          |
| 8132830 | -0,42 | -1,34 | 0,69194 | -0,35 | -1,28 | 0,47415 | ---             | ---          |
| 8043833 | -0,42 | -1,34 | 0,12450 | 0,10  | 1,07  | 0,55947 | ---             | TAAR5        |
| 8129604 | -0,42 | -1,34 | 0,18992 | -1,43 | -2,69 | 0,10659 | NM_003967       | ---          |
| 8097645 | -0,42 | -1,34 | 0,14708 | -0,81 | -1,76 | 0,02242 | ---             | FLJ25758     |
| 8025124 | -0,42 | -1,34 | 0,10900 | -1,56 | -2,96 | 0,00830 | NR_024372       | ---          |
| 7971075 | -0,42 | -1,34 | 0,11338 | -0,91 | -1,87 | 0,00323 | ---             | ---          |
| 8032751 | -0,42 | -1,34 | 0,25898 | -0,57 | -1,48 | 0,02220 | ---             | ---          |
| 8162249 | -0,42 | -1,34 | 0,39026 | -0,26 | -1,20 | 0,10947 | ---             | ---          |
| 8012891 | -0,42 | -1,34 | 0,26752 | -0,27 | -1,21 | 0,13023 | ---             | OR4C3        |
| 7939873 | -0,42 | -1,34 | 0,41475 | -0,97 | -1,96 | 0,00262 | NM_001004702    | HTR1D        |
| 7913566 | -0,42 | -1,34 | 0,32171 | 3,42  | 10,68 | 0,00658 | NM_000864       | COQ4         |
| 8158214 | -0,42 | -1,34 | 0,39923 | 0,46  | 1,38  | 0,13218 | NM_016035       | MTCP1        |
| 8176219 | -0,42 | -1,34 | 0,15445 | 1,12  | 2,18  | 0,01293 | NM_001018025    | SCEL         |
| 7969493 | -0,42 | -1,34 | 0,10909 | 2,31  | 4,97  | 0,01334 | NM_144777       | MYL10        |
| 8141737 | -0,42 | -1,34 | 0,11343 | -0,88 | -1,84 | 0,12600 | NM_138403       | SNORD34      |
| 8030364 | -0,42 | -1,34 | 0,09739 | -0,79 | -1,72 | 0,31682 | NR_000019       | KIF21B       |
| 7923233 | -0,42 | -1,34 | 0,11268 | 0,43  | 1,35  | 0,26239 | NM_017596       | RMI1         |
| 8156126 | -0,42 | -1,34 | 0,28799 | 1,03  | 2,05  | 0,05647 | NM_024945       | ---          |
| 8168727 | -0,42 | -1,34 | 0,28323 | -1,09 | -2,13 | 0,02756 | ---             | ADH6         |
| 8101862 | -0,42 | -1,34 | 0,13198 | -1,02 | -2,03 | 0,00002 | NM_001102470    | LOC100131613 |
| 7964868 | -0,42 | -1,34 | 0,38585 | -1,08 | -2,12 | 0,00179 | ENST00000451128 | ---          |
| 8149322 | -0,42 | -1,34 | 0,14465 | -1,28 | -2,43 | 0,00946 | ---             | LOC100131581 |
| 8144701 | -0,42 | -1,34 | 0,52139 | -0,79 | -1,73 | 0,15046 | AK092544 TSSK1B |              |
| 8113573 | -0,42 | -1,34 | 0,41558 | -0,86 | -1,81 | 0,00098 | NM_032028       | C17orf90     |
| 8019238 | -0,42 | -1,34 | 0,44010 | 0,84  | 1,79  | 0,08443 | BC090923 TUBA3C |              |
| 7970395 | -0,42 | -1,34 | 0,28419 | -0,89 | -1,85 | 0,00688 | NM_006001       | SOX9         |

|         |       |       |         |       |        |         |              |           |
|---------|-------|-------|---------|-------|--------|---------|--------------|-----------|
| 8009517 | -0,42 | -1,34 | 0,37871 | -0,45 | -1,37  | 0,13845 | NM_000346    | IGSF1     |
| 8175121 | -0,42 | -1,34 | 0,13952 | -0,83 | -1,78  | 0,00479 | NM_001555    | OR4C12    |
| 7948103 | -0,42 | -1,34 | 0,26702 | -0,96 | -1,94  | 0,01068 | NM_001005270 | ANKRD55   |
| 8112159 | -0,42 | -1,34 | 0,39155 | -1,33 | -2,52  | 0,00009 | NM_024669    | CNTNAP2   |
| 8137010 | -0,42 | -1,34 | 0,00346 | -0,34 | -1,27  | 0,08190 | NM_014141    | APBA2     |
| 7982187 | -0,42 | -1,34 | 0,07170 | 1,22  | 2,33   | 0,01119 | NM_005503    | ABCA10    |
| 8009474 | -0,42 | -1,34 | 0,00358 | -1,26 | -2,40  | 0,02252 | NM_080282    | ---       |
| 8117620 | -0,42 | -1,34 | 0,49223 | -0,33 | -1,26  | 0,04616 | ---          | OR10J1    |
| 7906452 | -0,42 | -1,34 | 0,18453 | -1,64 | -3,11  | 0,01611 | NM_012351    | ---       |
| 8052056 | -0,42 | -1,34 | 0,01786 | -0,42 | -1,34  | 0,08567 | ---          | ---       |
| 8129039 | -0,42 | -1,34 | 0,23062 | -0,46 | -1,37  | 0,29702 | ---          | ---       |
| 8022168 | -0,42 | -1,34 | 0,08738 | -1,38 | -2,60  | 0,00529 | ---          | ---       |
| 7912525 | -0,42 | -1,34 | 0,02312 | -0,50 | -1,41  | 0,00175 | ---          | ---       |
| 8092638 | -0,42 | -1,34 | 0,19214 | -0,85 | -1,80  | 0,00302 | ---          | FXYD1     |
| 8027760 | -0,42 | -1,34 | 0,17062 | -1,90 | -3,74  | 0,00244 | NM_005031    | ---       |
| 8121112 | -0,42 | -1,34 | 0,27381 | -1,39 | -2,61  | 0,03884 | ---          | DAGLA     |
| 7940508 | -0,42 | -1,34 | 0,05988 | 1,09  | 2,13   | 0,01143 | NM_006133    | ---       |
| 8017100 | -0,42 | -1,34 | 0,33139 | -0,49 | -1,40  | 0,01994 | ---          | FKBP1B    |
| 8040530 | -0,42 | -1,34 | 0,32517 | -0,35 | -1,27  | 0,30831 | NM_054033    | OR4K2     |
| 7973012 | -0,42 | -1,34 | 0,34068 | -1,19 | -2,28  | 0,00917 | NM_001005501 | GABRG1    |
| 8100097 | -0,42 | -1,34 | 0,01933 | -1,31 | -2,48  | 0,00048 | NM_173536    | C8orf54   |
| 8152734 | -0,42 | -1,34 | 0,31811 | -1,16 | -2,23  | 0,00001 | BC137357     | COQ6      |
| 7980069 | -0,42 | -1,34 | 0,10091 | -0,60 | -1,51  | 0,05456 | NM_182480    | PPM1N     |
| 8029701 | -0,42 | -1,34 | 0,12165 | 0,09  | 1,07   | 0,71065 | NM_001080401 | LYAR      |
| 8099107 | -0,42 | -1,34 | 0,00011 | 1,13  | 2,19   | 0,05480 | NM_017816    | LCE2C     |
| 7905503 | -0,42 | -1,34 | 0,52499 | -1,13 | -2,20  | 0,17529 | NM_178429    | OR1J4     |
| 8157671 | -0,42 | -1,34 | 0,05251 | -0,80 | -1,75  | 0,00953 | NM_001004452 | CDC14C    |
| 8132803 | -0,42 | -1,34 | 0,32928 | -1,18 | -2,27  | 0,07341 | NR_003595    | FMO9P     |
| 7907012 | -0,42 | -1,34 | 0,35027 | -0,46 | -1,38  | 0,10516 | NR_002925    | OR2B6     |
| 8117622 | -0,42 | -1,34 | 0,36665 | -0,83 | -1,78  | 0,11818 | NM_012367    | TNIP1     |
| 8115210 | -0,42 | -1,34 | 0,31713 | 0,82  | 1,76   | 0,00926 | NM_006058    | PIN4      |
| 8168366 | -0,42 | -1,34 | 0,36879 | 0,26  | 1,20   | 0,44867 | NM_006223    | SSX2      |
| 8172787 | -0,42 | -1,34 | 0,53261 | -1,58 | -2,99  | 0,04214 | NM_003147    | OR6P1     |
| 7921362 | -0,42 | -1,34 | 0,38943 | -2,53 | -5,79  | 0,00192 | NM_001160325 | ATP5S     |
| 7974257 | -0,42 | -1,34 | 0,11664 | 0,09  | 1,06   | 0,88974 | NM_015684    | PIGO      |
| 8160953 | -0,42 | -1,34 | 0,38011 | 1,73  | 3,31   | 0,02636 | NM_032634    | TARBP2    |
| 7955829 | -0,42 | -1,34 | 0,06324 | 0,46  | 1,37   | 0,37652 | NM_134323    | ---       |
| 7903876 | -0,42 | -1,34 | 0,26414 | -0,73 | -1,66  | 0,07711 | ---          | ---       |
| 8060741 | -0,42 | -1,34 | 0,31755 | 0,23  | 1,18   | 0,26633 | ---          | RNASE10   |
| 7973078 | -0,42 | -1,34 | 0,30532 | -0,67 | -1,59  | 0,06836 | NM_001012975 | SCARNA10  |
| 7953383 | -0,42 | -1,34 | 0,16260 | -0,34 | -1,27  | 0,17427 | NR_004387    | FAM108A1  |
| 8074842 | -0,42 | -1,34 | 0,35658 | 0,85  | 1,81   | 0,18098 | NM_001130111 | LOC284581 |
| 7909144 | -0,42 | -1,34 | 0,24844 | -2,12 | -4,36  | 0,00287 | AK094426     | LOC93463  |
| 8059902 | -0,42 | -1,34 | 0,43448 | -1,95 | -3,87  | 0,00024 | AL122100     | ---       |
| 7970392 | -0,42 | -1,34 | 0,85859 | -5,69 | -51,77 | 0,00193 | ---          | C10orf71  |
| 7927474 | -0,42 | -1,34 | 0,02113 | -0,94 | -1,92  | 0,01280 | NM_001135196 | TLE3      |
| 7990033 | -0,42 | -1,34 | 0,12474 | 0,06  | 1,05   | 0,87786 | NM_005078    | EGFLAM    |
| 8105013 | -0,42 | -1,34 | 0,32272 | -1,23 | -2,35  | 0,00080 | NM_152403    | NR4A1     |
| 7955589 | -0,42 | -1,34 | 0,13227 | 1,43  | 2,69   | 0,01048 | NM_002135    | C7orf72   |
| 8132813 | -0,42 | -1,34 | 0,38156 | -0,75 | -1,68  | 0,02152 | NM_001161834 | ---       |
| 7902787 | -0,42 | -1,34 | 0,35117 | -0,69 | -1,61  | 0,08103 | ---          | OR2A9P    |
| 8143629 | -0,42 | -1,34 | 0,61110 | 1,39  | 2,63   | 0,00796 | NR_002157    | SLC16A13  |
| 8004266 | -0,42 | -1,34 | 0,08025 | 2,56  | 5,92   | 0,04086 | NM_201566    | DSCAM     |
| 8070421 | -0,42 | -1,34 | 0,09549 | -1,52 | -2,87  | 0,00188 | NM_001389    | ---       |
| 7989489 | -0,42 | -1,34 | 0,05422 | -1,23 | -2,34  | 0,04346 | ---          | TUBB2A    |
| 8123644 | -0,42 | -1,34 | 0,16146 | -1,66 | -3,17  | 0,00046 | NM_001069    | FLJ41484  |
| 7972932 | -0,42 | -1,34 | 0,40498 | -0,85 | -1,80  | 0,03280 | AK092862     | GDPD2     |
| 8168163 | -0,42 | -1,34 | 0,28117 | -0,80 | -1,74  | 0,05620 | NM_001171192 | DACT1     |
| 7974689 | -0,42 | -1,34 | 0,09310 | -1,46 | -2,76  | 0,00094 | NM_016651    | LAMC2     |
| 7908072 | -0,42 | -1,34 | 0,20479 | 2,67  | 6,35   | 0,00011 | NM_005562    | CCDC63    |
| 7958711 | -0,43 | -1,34 | 0,01257 | -0,63 | -1,55  | 0,05282 | NM_152591    | LRRIQ3    |
| 7917008 | -0,43 | -1,34 | 0,10858 | -0,94 | -1,92  | 0,00108 | NM_001105659 | GRHL2     |
| 8147697 | -0,43 | -1,34 | 0,10628 | 0,59  | 1,50   | 0,04093 | NM_024915    | APOLD1    |
| 7954055 | -0,43 | -1,34 | 0,24830 | -0,53 | -1,44  | 0,06607 | NM_001130415 | ---       |
| 8127496 | -0,43 | -1,34 | 0,00004 | -1,04 | -2,05  | 0,04483 | ---          | BBOX1     |
| 7939056 | -0,43 | -1,34 | 0,04559 | -0,91 | -1,87  | 0,00139 | NM_003986    | UBTF1     |
| 8054075 | -0,43 | -1,34 | 0,34971 | -1,31 | -2,48  | 0,01211 | NM_001143975 | ABCG5     |
| 8051866 | -0,43 | -1,34 | 0,25844 | -0,85 | -1,80  | 0,01340 | NM_022436    | LIPC      |
| 7983928 | -0,43 | -1,34 | 0,06066 | -1,04 | -2,06  | 0,05547 | NM_000236    | PLAC8     |
| 8101429 | -0,43 | -1,34 | 0,14774 | 0,62  | 1,54   | 0,09009 | NM_016619    | MPZL2     |
| 7952046 | -0,43 | -1,34 | 0,21576 | 3,75  | 13,50  | 0,00215 | NM_144765    | CCDC159   |
| 8025868 | -0,43 | -1,34 | 0,36373 | 0,03  | 1,02   | 0,93166 | NM_001080503 | PRR7      |
| 8110382 | -0,43 | -1,34 | 0,24705 | -0,05 | -1,03  | 0,71954 | NM_030567    | OGDHL     |

|         |       |       |         |       |       |         |                 |              |
|---------|-------|-------|---------|-------|-------|---------|-----------------|--------------|
| 7933537 | -0,43 | -1,34 | 0,42516 | -0,34 | -1,27 | 0,38202 | NM_018245       | ---          |
| 7932792 | -0,43 | -1,34 | 0,25615 | -1,05 | -2,07 | 0,10086 | ---             | ZCCHC5       |
| 8173752 | -0,43 | -1,34 | 0,17069 | -0,66 | -1,58 | 0,00980 | NM_152694       | ---          |
| 7983661 | -0,43 | -1,34 | 0,53782 | -1,20 | -2,29 | 0,29407 | ---             | ASB14        |
| 8088292 | -0,43 | -1,34 | 0,36831 | -0,92 | -1,89 | 0,03768 | NM_130387       | C6orf218     |
| 8123876 | -0,43 | -1,34 | 0,24142 | -0,47 | -1,39 | 0,07352 | NR_027793       | RDH5         |
| 7956018 | -0,43 | -1,34 | 0,31351 | -0,96 | -1,94 | 0,00536 | NM_002905       | CNTROB       |
| 8004741 | -0,43 | -1,34 | 0,23367 | 0,10  | 1,07  | 0,49581 | NM_001037144    | ---          |
| 8171874 | -0,43 | -1,34 | 0,17040 | -1,32 | -2,49 | 0,02900 | ---             | DGKE         |
| 8008629 | -0,43 | -1,34 | 0,24724 | 1,34  | 2,54  | 0,03513 | NM_003647       | TOP3B        |
| 8074817 | -0,43 | -1,34 | 0,11183 | 1,32  | 2,50  | 0,08343 | NM_003935       | ---          |
| 7985023 | -0,43 | -1,34 | 0,56262 | -1,32 | -2,50 | 0,00087 | ---             | PHACTR1      |
| 8116932 | -0,43 | -1,34 | 0,02785 | -1,10 | -2,15 | 0,00058 | NM_030948       | MYH6         |
| 7977987 | -0,43 | -1,34 | 0,00187 | -1,01 | -2,02 | 0,02157 | NM_002471       | LOC100291851 |
| 7941269 | -0,43 | -1,34 | 0,32544 | 1,01  | 2,02  | 0,03562 | ENST00000309775 | SCGB1D1      |
| 7940622 | -0,43 | -1,34 | 0,27116 | -1,03 | -2,04 | 0,00330 | NM_006552       | GPAA1        |
| 8148715 | -0,43 | -1,35 | 0,39690 | 2,45  | 5,45  | 0,01192 | NM_003801       | LOC646999    |
| 8132404 | -0,43 | -1,35 | 0,30271 | -0,96 | -1,94 | 0,00599 | NR_024390       | SLC6A14      |
| 8169504 | -0,43 | -1,35 | 0,00848 | 4,84  | 28,66 | 0,00004 | NM_007231       | HUS1B        |
| 8123558 | -0,43 | -1,35 | 0,11313 | -0,36 | -1,28 | 0,10252 | NM_148959       | IGFL1        |
| 8029779 | -0,43 | -1,35 | 0,48892 | -1,53 | -2,90 | 0,06397 | NM_198541       | HAAO         |
| 8051799 | -0,43 | -1,35 | 0,16667 | -0,37 | -1,29 | 0,39303 | NM_012205       | MMP15        |
| 7996185 | -0,43 | -1,35 | 0,17662 | 1,45  | 2,72  | 0,02344 | NM_002428       | MRM1         |
| 8006668 | -0,43 | -1,35 | 0,23209 | 1,66  | 3,15  | 0,01090 | NM_024864       | FAM89A       |
| 7925028 | -0,43 | -1,35 | 0,36602 | -0,10 | -1,07 | 0,80997 | NM_198552       | RSP03        |
| 8121916 | -0,43 | -1,35 | 0,33456 | 1,02  | 2,03  | 0,06556 | NM_032784       | GNB3         |
| 7953469 | -0,43 | -1,35 | 0,40540 | -0,55 | -1,47 | 0,28577 | NM_002075       | LOC349196    |
| 8149218 | -0,43 | -1,35 | 0,74347 | -1,46 | -2,76 | 0,07754 | NR_027000       | LOC349196    |
| 8149220 | -0,43 | -1,35 | 0,74347 | -1,46 | -2,76 | 0,07754 | NR_027000       | LOC349196    |
| 8149222 | -0,43 | -1,35 | 0,74347 | -1,46 | -2,76 | 0,07754 | NR_027000       | LOC349196    |
| 8149224 | -0,43 | -1,35 | 0,74347 | -1,46 | -2,76 | 0,07754 | NR_027000       | LOC349196    |
| 8149226 | -0,43 | -1,35 | 0,74347 | -1,46 | -2,76 | 0,07754 | NR_027000       | SCAMP5       |
| 7984932 | -0,43 | -1,35 | 0,28426 | 0,87  | 1,82  | 0,15740 | NM_138967       | ---          |
| 8117624 | -0,43 | -1,35 | 0,31281 | -1,54 | -2,90 | 0,00735 | ---             | ---          |
| 7987066 | -0,43 | -1,35 | 0,19937 | -1,63 | -3,10 | 0,00015 | ---             | HIST1H2BG    |
| 8124423 | -0,43 | -1,35 | 0,12281 | -0,25 | -1,19 | 0,59734 | NM_003518       | ---          |
| 7990090 | -0,43 | -1,35 | 0,13551 | -0,49 | -1,41 | 0,30587 | ---             | PER1         |
| 8012349 | -0,43 | -1,35 | 0,01412 | -0,22 | -1,17 | 0,21907 | NM_002616       | KIF13B       |
| 8150036 | -0,43 | -1,35 | 0,34634 | 1,48  | 2,79  | 0,00008 | NM_015254       | SLC4A5       |
| 8053073 | -0,43 | -1,35 | 0,07211 | -0,03 | -1,02 | 0,89959 | NM_133478       | MYEOV        |
| 7942118 | -0,43 | -1,35 | 0,14459 | 1,62  | 3,08  | 0,03528 | NM_138768       | STX11        |
| 8122457 | -0,43 | -1,35 | 0,29058 | 0,05  | 1,03  | 0,94182 | NM_003764       | FLJ44874     |
| 7960436 | -0,43 | -1,35 | 0,18357 | -1,34 | -2,53 | 0,03549 | AK126822        | ---          |
| 8122732 | -0,43 | -1,35 | 0,21071 | 0,27  | 1,21  | 0,29282 | ---             | CDKN2B       |
| 8160452 | -0,43 | -1,35 | 0,24694 | -0,47 | -1,38 | 0,42104 | NM_078487       | LRRC36       |
| 7996546 | -0,43 | -1,35 | 0,40979 | -0,38 | -1,30 | 0,16492 | NM_018296       | C17orf66     |
| 8014298 | -0,43 | -1,35 | 0,02337 | -0,77 | -1,70 | 0,00051 | NM_152781       | FCGR2B       |
| 7906777 | -0,43 | -1,35 | 0,06817 | -0,92 | -1,89 | 0,04253 | NM_004001       | PRH2         |
| 7953967 | -0,43 | -1,35 | 0,32116 | -0,37 | -1,30 | 0,31101 | NM_005042       | PPP4R1L      |
| 8067248 | -0,43 | -1,35 | 0,16061 | 0,34  | 1,26  | 0,12402 | NR_003505       | HTR1E        |
| 8120983 | -0,43 | -1,35 | 0,43067 | -0,79 | -1,73 | 0,03153 | NM_000865       | SLC39A5      |
| 7956229 | -0,43 | -1,35 | 0,30073 | -0,18 | -1,13 | 0,34346 | NM_001135195    | ---          |
| 8126145 | -0,43 | -1,35 | 0,11191 | -1,16 | -2,23 | 0,00737 | ---             | ---          |
| 8161000 | -0,43 | -1,35 | 0,21943 | -1,48 | -2,79 | 0,00379 | ---             | CDA          |
| 7898655 | -0,43 | -1,35 | 0,36175 | 2,66  | 6,30  | 0,00232 | NM_001785       | GABRB1       |
| 8094901 | -0,43 | -1,35 | 0,14871 | -1,05 | -2,07 | 0,00078 | NM_000812       | ---          |
| 8123340 | -0,43 | -1,35 | 0,36932 | -0,53 | -1,45 | 0,16203 | ---             | ---          |
| 8135216 | -0,43 | -1,35 | 0,11688 | -1,06 | -2,09 | 0,03368 | ---             | INSRR        |
| 7921155 | -0,43 | -1,35 | 0,53246 | -1,76 | -3,39 | 0,00319 | NM_014215       | TAS2R8       |
| 7961243 | -0,43 | -1,35 | 0,07941 | -1,13 | -2,19 | 0,03492 | NM_023918       | DCT          |
| 7972259 | -0,43 | -1,35 | 0,10893 | -1,16 | -2,23 | 0,01828 | NM_001922       | RASL12       |
| 7989718 | -0,43 | -1,35 | 0,29857 | -1,92 | -3,79 | 0,01408 | NM_016563       | KCNMB3       |
| 8092241 | -0,43 | -1,35 | 0,51959 | -0,86 | -1,82 | 0,25601 | NM_171830       | OSTalpha     |
| 8084929 | -0,43 | -1,35 | 0,50399 | -1,29 | -2,45 | 0,01808 | NM_152672       | FAM23A       |
| 7926403 | -0,43 | -1,35 | 0,01152 | -0,51 | -1,42 | 0,15124 | NM_001098844    | FAM23A       |
| 7926445 | -0,43 | -1,35 | 0,01152 | -0,51 | -1,42 | 0,15124 | NM_001098844    | CCL4L1       |
| 8006621 | -0,43 | -1,35 | 0,20125 | -0,84 | -1,79 | 0,00319 | NM_001001435    | CCL4L1       |
| 8019651 | -0,43 | -1,35 | 0,20125 | -0,84 | -1,79 | 0,00319 | NM_001001435    | ETFB         |
| 8038792 | -0,43 | -1,35 | 0,02322 | -0,46 | -1,37 | 0,13331 | NM_001985       | RHOB         |
| 8040473 | -0,43 | -1,35 | 0,15805 | 0,03  | 1,02  | 0,95750 | NM_004040       | SH3GLB2      |
| 8164521 | -0,43 | -1,35 | 0,25673 | 2,22  | 4,67  | 0,00245 | NM_020145       | MAT1A        |
| 7934755 | -0,43 | -1,35 | 0,20235 | -0,90 | -1,86 | 0,00022 | NM_000429       | ANAPC1       |
| 8054437 | -0,43 | -1,35 | 0,27748 | 1,29  | 2,44  | 0,03342 | NM_022662       | C17orf47     |

|         |       |       |         |       |       |         |              |              |
|---------|-------|-------|---------|-------|-------|---------|--------------|--------------|
| 8017057 | -0,43 | -1,35 | 0,32878 | -1,24 | -2,37 | 0,00566 | BC022189     | ---          |
| 7979808 | -0,43 | -1,35 | 0,20498 | -0,46 | -1,38 | 0,14622 | ---          | STX19        |
| 8089026 | -0,43 | -1,35 | 0,03623 | -1,34 | -2,54 | 0,03240 | NM_001001850 | ---          |
| 7904082 | -0,43 | -1,35 | 0,10778 | -0,19 | -1,14 | 0,46399 | ---          | ---          |
| 7904431 | -0,43 | -1,35 | 0,22089 | -0,32 | -1,25 | 0,35866 | ---          | ---          |
| 8092183 | -0,43 | -1,35 | 0,15893 | -1,68 | -3,20 | 0,00418 | ---          | PLEKHG1      |
| 8122756 | -0,43 | -1,35 | 0,35248 | 0,50  | 1,42  | 0,02128 | NM_001029884 | MVD          |
| 8003332 | -0,43 | -1,35 | 0,24560 | 0,22  | 1,16  | 0,49609 | NM_002461    | GNAZ         |
| 8071671 | -0,43 | -1,35 | 0,38849 | 0,28  | 1,22  | 0,39337 | NM_002073    | LOC100131195 |
| 7933190 | -0,43 | -1,35 | 0,00378 | -0,75 | -1,68 | 0,02814 | AK097743     | ---          |
| 7983377 | -0,43 | -1,35 | 0,25901 | -1,41 | -2,66 | 0,01669 | ---          | FGF13        |
| 8175444 | -0,43 | -1,35 | 0,23568 | -0,61 | -1,53 | 0,01634 | NM_004114    | ---          |
| 8040286 | -0,43 | -1,35 | 0,38621 | -1,22 | -2,34 | 0,00182 | ---          | GPR52        |
| 7907531 | -0,43 | -1,35 | 0,31820 | -0,97 | -1,96 | 0,01210 | NM_005684    | CDH24        |
| 7977888 | -0,43 | -1,35 | 0,28471 | -0,04 | -1,03 | 0,88403 | NM_022478    | GYPA         |
| 8102998 | -0,43 | -1,35 | 0,23715 | -1,02 | -2,03 | 0,04079 | NM_002099    | TLL1         |
| 8098214 | -0,43 | -1,35 | 0,26757 | -0,66 | -1,58 | 0,01174 | NM_012464    | ZNF544       |
| 8031884 | -0,43 | -1,35 | 0,44568 | 0,82  | 1,77  | 0,15008 | NM_014480    | AGAP5        |
| 7933427 | -0,43 | -1,35 | 0,35636 | 1,45  | 2,74  | 0,00793 | NM_001144000 | RPGRIP1      |
| 7973185 | -0,43 | -1,35 | 0,16472 | -0,51 | -1,43 | 0,01095 | NM_020366    | SPRY3        |
| 8171034 | -0,43 | -1,35 | 0,33416 | -0,43 | -1,35 | 0,00889 | NM_005840    | SPRY3        |
| 8176955 | -0,43 | -1,35 | 0,33416 | -0,43 | -1,35 | 0,00889 | NM_005840    | ATP6V1G3     |
| 7923164 | -0,43 | -1,35 | 0,01880 | -0,46 | -1,37 | 0,27929 | NM_133326    | OR8D4        |
| 7944793 | -0,43 | -1,35 | 0,02919 | -1,38 | -2,61 | 0,00721 | NM_001005197 | MUC12        |
| 8135037 | -0,43 | -1,35 | 0,08002 | -0,50 | -1,42 | 0,02750 | NM_001164462 | ---          |
| 8172445 | -0,43 | -1,35 | 0,00731 | -1,25 | -2,38 | 0,00000 | ---          | ZNF774       |
| 7986004 | -0,43 | -1,35 | 0,09602 | 0,75  | 1,69  | 0,15737 | NM_001004309 | ---          |
| 8085970 | -0,43 | -1,35 | 0,31732 | -1,18 | -2,27 | 0,00613 | ---          | CLEC4E       |
| 7960900 | -0,43 | -1,35 | 0,17643 | -0,33 | -1,26 | 0,12841 | NM_014358    | ---          |
| 7904691 | -0,43 | -1,35 | 0,01342 | -0,76 | -1,70 | 0,10811 | ---          | CHPF         |
| 8059244 | -0,43 | -1,35 | 0,37531 | 0,55  | 1,46  | 0,48169 | NM_024536    | DNM1         |
| 8158183 | -0,43 | -1,35 | 0,28698 | 1,74  | 3,35  | 0,02495 | NM_004408    | ---          |
| 7897520 | -0,43 | -1,35 | 0,07636 | -0,14 | -1,10 | 0,67925 | ---          | ---          |
| 8048701 | -0,43 | -1,35 | 0,32306 | -0,54 | -1,45 | 0,14054 | ---          | ASB15        |
| 8135804 | -0,43 | -1,35 | 0,04872 | -1,02 | -2,02 | 0,03844 | NM_080928    | ---          |
| 7991153 | -0,43 | -1,35 | 0,02613 | -0,60 | -1,52 | 0,03079 | ---          | ARFRP1       |
| 8067727 | -0,44 | -1,35 | 0,22659 | 0,05  | 1,03  | 0,78933 | NM_003224    | SHF          |
| 7988400 | -0,44 | -1,35 | 0,20007 | -1,02 | -2,03 | 0,11936 | NM_138356    | MUS81        |
| 7941425 | -0,44 | -1,35 | 0,02105 | 0,16  | 1,12  | 0,72825 | NM_025128    | CHRND        |
| 8049152 | -0,44 | -1,35 | 0,45227 | -0,90 | -1,87 | 0,01337 | NM_000751    | IGSF10       |
| 8091537 | -0,44 | -1,35 | 0,08059 | -1,17 | -2,25 | 0,00804 | NM_178822    | FLJ34690     |
| 8005043 | -0,44 | -1,35 | 0,33844 | -1,74 | -3,34 | 0,03321 | AK092009     | FLJ16126     |
| 7912280 | -0,44 | -1,35 | 0,10397 | -0,90 | -1,86 | 0,00440 | AK131225     | WDR86        |
| 8143941 | -0,44 | -1,35 | 0,11574 | -0,98 | -1,97 | 0,04685 | NM_198285    | FLJ37201     |
| 7934961 | -0,44 | -1,35 | 0,00618 | 0,28  | 1,22  | 0,45944 | NR_026835    | ---          |
| 8094897 | -0,44 | -1,35 | 0,46496 | -0,81 | -1,75 | 0,00026 | ---          | UBE2M        |
| 8039805 | -0,44 | -1,35 | 0,52110 | -0,27 | -1,21 | 0,52823 | NM_003969    | FLT3LG       |
| 8030339 | -0,44 | -1,35 | 0,19674 | -0,21 | -1,16 | 0,47593 | NM_001459    | SNORA22      |
| 8133106 | -0,44 | -1,35 | 0,53558 | -1,12 | -2,17 | 0,25923 | NR_002961    | LOC339240    |
| 8005446 | -0,44 | -1,35 | 0,50550 | -1,72 | -3,29 | 0,00117 | AK127974     | ---          |
| 8068014 | -0,44 | -1,35 | 0,16362 | -1,11 | -2,15 | 0,00186 | ---          | FANK1        |
| 7931281 | -0,44 | -1,35 | 0,17637 | -0,85 | -1,80 | 0,00386 | NM_145235    | FLJ13224     |
| 7954692 | -0,44 | -1,35 | 0,38677 | -1,45 | -2,73 | 0,00632 | NR_026806    | HIST1H2AI    |
| 8117583 | -0,44 | -1,35 | 0,17256 | 1,12  | 2,18  | 0,00928 | NM_003509    | NKX3-1       |
| 8149811 | -0,44 | -1,35 | 0,37566 | 1,00  | 2,00  | 0,06530 | NM_006167    | SLC7A7       |
| 7977786 | -0,44 | -1,35 | 0,13374 | -1,46 | -2,76 | 0,00509 | NM_003982    | BAGE2        |
| 8069487 | -0,44 | -1,35 | 0,29653 | -1,23 | -2,34 | 0,00313 | NM_182482    | ESX1         |
| 8174291 | -0,44 | -1,35 | 0,29513 | -0,91 | -1,88 | 0,05373 | NM_153448    | FCHSD1       |
| 8114709 | -0,44 | -1,35 | 0,05197 | -0,31 | -1,24 | 0,41639 | NM_033449    | PRSS35       |
| 8120932 | -0,44 | -1,35 | 0,12390 | -1,70 | -3,24 | 0,01222 | NM_001170423 | ---          |
| 8168081 | -0,44 | -1,35 | 0,12006 | -0,73 | -1,66 | 0,02339 | ---          | PTPN22       |
| 7918657 | -0,44 | -1,35 | 0,09283 | -0,26 | -1,20 | 0,26148 | NM_015967    | MIR208A      |
| 7978019 | -0,44 | -1,35 | 0,20024 | -1,21 | -2,31 | 0,01703 | NR_029595    | GNAL         |
| 8020164 | -0,44 | -1,35 | 0,43585 | 1,55  | 2,92  | 0,01784 | NM_182978    | HDHD3        |
| 8163505 | -0,44 | -1,35 | 0,44949 | 0,31  | 1,24  | 0,48009 | NM_031219    | ---          |
| 8042113 | -0,44 | -1,35 | 0,14628 | -1,04 | -2,06 | 0,00251 | ---          | ---          |
| 7956668 | -0,44 | -1,35 | 0,56064 | -0,62 | -1,54 | 0,27178 | ---          | ARHGEF16     |
| 7897154 | -0,44 | -1,35 | 0,23175 | -0,41 | -1,33 | 0,16905 | NM_014448    | PIAS4        |
| 8024740 | -0,44 | -1,35 | 0,18134 | -0,03 | -1,02 | 0,95632 | NM_015897    | DNASE2B      |
| 7902623 | -0,44 | -1,35 | 0,29093 | -0,76 | -1,70 | 0,18391 | NM_021233    | FDPS         |
| 7920757 | -0,44 | -1,35 | 0,05800 | 0,14  | 1,10  | 0,58756 | NM_002004    | LOC401127    |
| 8094701 | -0,44 | -1,35 | 0,15185 | -0,26 | -1,20 | 0,10438 | NR_026854    | ---          |
| 8159873 | -0,44 | -1,35 | 0,48498 | -1,20 | -2,30 | 0,02287 | ---          | ---          |



|         |       |       |         |       |       |         |                 |              |  |
|---------|-------|-------|---------|-------|-------|---------|-----------------|--------------|--|
| 8045341 | -0,44 | -1,35 | 0,23519 | -0,47 | -1,38 | 0,19472 | ---             | SPHK2        |  |
| 8030078 | -0,44 | -1,35 | 0,21097 | 0,00  | -1,00 | 0,98939 | NM_020126       | ---          |  |
| 7968514 | -0,44 | -1,36 | 0,53298 | -0,64 | -1,56 | 0,00687 | ---             | HIST1H2AJ    |  |
| 8124518 | -0,44 | -1,36 | 0,14156 | -0,24 | -1,18 | 0,65389 | NM_021066       | INTS3        |  |
| 7920337 | -0,44 | -1,36 | 0,16178 | -0,24 | -1,18 | 0,38249 | NM_023015       | LOC100129581 |  |
| 8050113 | -0,44 | -1,36 | 0,42139 | -1,32 | -2,50 | 0,00125 | AK125905        | WFIKKN1      |  |
| 7991927 | -0,44 | -1,36 | 0,23040 | -1,80 | -3,49 | 0,01395 | NM_053284       | DYRK2        |  |
| 7956930 | -0,44 | -1,36 | 0,11067 | 1,52  | 2,87  | 0,03392 | NM_006482       | IL17F        |  |
| 8127024 | -0,44 | -1,36 | 0,51317 | -0,74 | -1,66 | 0,03355 | NM_052872       | ---          |  |
| 8150918 | -0,44 | -1,36 | 0,03146 | -1,68 | -3,20 | 0,00816 | ---             | MIR186       |  |
| 7916984 | -0,44 | -1,36 | 0,10101 | -0,49 | -1,41 | 0,00330 | NR_029707       | LOC644714    |  |
| 8097474 | -0,44 | -1,36 | 0,22620 | -1,21 | -2,31 | 0,08699 | BC047037        | ZNF137       |  |
| 8030954 | -0,44 | -1,36 | 0,37679 | -0,09 | -1,06 | 0,48367 | NR_023311       | FAM26D       |  |
| 8121605 | -0,44 | -1,36 | 0,36863 | -1,39 | -2,62 | 0,01830 | NM_153036       | OR8K3        |  |
| 7939977 | -0,44 | -1,36 | 0,28800 | -1,14 | -2,20 | 0,03925 | NM_001005202    | PRIC285      |  |
| 8067680 | -0,44 | -1,36 | 0,26828 | -0,25 | -1,19 | 0,47407 | NM_001037335    | MRO          |  |
| 8023361 | -0,44 | -1,36 | 0,05154 | -1,01 | -2,01 | 0,00141 | NM_031939       | ---          |  |
| 8174889 | -0,44 | -1,36 | 0,41130 | -0,21 | -1,16 | 0,41687 | ---             | CENPB        |  |
| 8064762 | -0,44 | -1,36 | 0,39864 | -0,26 | -1,20 | 0,37655 | NM_001810       | SNORA15      |  |
| 8133072 | -0,44 | -1,36 | 0,40104 | -1,21 | -2,31 | 0,01621 | NR_002957       | SNORA15      |  |
| 8133108 | -0,44 | -1,36 | 0,40104 | -1,21 | -2,31 | 0,01621 | NR_002957       | CLEC4M       |  |
| 8025303 | -0,44 | -1,36 | 0,23735 | -0,35 | -1,27 | 0,24490 | NR_026707       | SOBP         |  |
| 8121319 | -0,44 | -1,36 | 0,31817 | -0,50 | -1,42 | 0,01641 | NM_018013       | ---          |  |
| 7977784 | -0,44 | -1,36 | 0,04771 | -0,64 | -1,56 | 0,00055 | ---             | HIST2H3D     |  |
| 7919612 | -0,44 | -1,36 | 0,41372 | 2,09  | 4,27  | 0,00156 | NM_001123375    | MIR146A      |  |
| 8109649 | -0,44 | -1,36 | 0,22907 | -0,59 | -1,51 | 0,03139 | NR_029701       | C4orf50      |  |
| 8099193 | -0,44 | -1,36 | 0,44434 | -0,72 | -1,65 | 0,16543 | BC140710        | PCP4         |  |
| 8068651 | -0,44 | -1,36 | 0,24045 | -0,66 | -1,58 | 0,11120 | NM_006198       | GPC1         |  |
| 8049670 | -0,44 | -1,36 | 0,60098 | -0,02 | -1,02 | 0,97101 | NM_002081       | CLEC2A       |  |
| 7961091 | -0,44 | -1,36 | 0,31532 | -0,79 | -1,73 | 0,00635 | NM_001130711    | GOLGA8DP     |  |
| 7986642 | -0,44 | -1,36 | 0,35315 | -0,54 | -1,46 | 0,22281 | NR_027407       | RNF152       |  |
| 8023598 | -0,44 | -1,36 | 0,13804 | -0,81 | -1,75 | 0,00557 | NM_173557       | ---          |  |
| 7916783 | -0,44 | -1,36 | 0,12408 | -0,83 | -1,78 | 0,00301 | ---             | L2HGDH       |  |
| 7978956 | -0,44 | -1,36 | 0,14006 | 2,25  | 4,77  | 0,00087 | NM_024884       | PRELID2      |  |
| 8114845 | -0,44 | -1,36 | 0,30667 | 0,15  | 1,11  | 0,65148 | NM_182960       | MIR25        |  |
| 8141419 | -0,44 | -1,36 | 0,42049 | -0,50 | -1,41 | 0,13119 | NR_029498       | BTN2A1       |  |
| 8117485 | -0,44 | -1,36 | 0,24199 | 0,00  | 1,00  | 0,99442 | NM_078476       | C21orf34     |  |
| 8067932 | -0,44 | -1,36 | 0,00458 | -1,25 | -2,39 | 0,02125 | NR_027790       | FABP5        |  |
| 8147049 | -0,44 | -1,36 | 0,21992 | 1,43  | 2,70  | 0,00039 | NM_001444       | C10orf93     |  |
| 7937135 | -0,44 | -1,36 | 0,28459 | -0,73 | -1,66 | 0,02249 | NM_173572       | LOC100129677 |  |
| 8004938 | -0,44 | -1,36 | 0,04033 | -1,51 | -2,85 | 0,00970 | ENST00000420547 | ---          |  |
| 8120360 | -0,44 | -1,36 | 0,13174 | -0,77 | -1,70 | 0,01814 | ---             | KBTBD8       |  |
| 8080911 | -0,44 | -1,36 | 0,01596 | -1,56 | -2,95 | 0,01003 | NM_032505       | ---          |  |
| 8112329 | -0,44 | -1,36 | 0,01473 | -1,31 | -2,48 | 0,09505 | ---             | MIB2         |  |
| 7896985 | -0,44 | -1,36 | 0,38309 | -0,23 | -1,17 | 0,56114 | NM_080875       | SPAG1        |  |
| 8147661 | -0,44 | -1,36 | 0,04711 | 0,87  | 1,83  | 0,08755 | NM_003114       | ---          |  |
| 8152289 | -0,44 | -1,36 | 0,28339 | -2,08 | -4,22 | 0,00857 | ---             | ---          |  |
| 7909525 | -0,44 | -1,36 | 0,14483 | 0,00  | -1,00 | 0,98486 | ---             | FAM161A      |  |
| 8052554 | -0,44 | -1,36 | 0,38266 | 0,92  | 1,89  | 0,07991 | NM_032180       | SAMD5        |  |
| 8122634 | -0,44 | -1,36 | 0,06704 | -0,58 | -1,49 | 0,01296 | NM_001030060    | MST1         |  |
| 8087447 | -0,44 | -1,36 | 0,42109 | -0,40 | -1,32 | 0,13567 | NM_020998       | KRTAP19-2    |  |
| 8069827 | -0,44 | -1,36 | 0,11480 | -0,24 | -1,18 | 0,19150 | NM_181608       | ---          |  |
| 7983523 | -0,44 | -1,36 | 0,19240 | -0,82 | -1,77 | 0,02718 | ---             | RNASEL       |  |
| 7922707 | -0,44 | -1,36 | 0,05887 | 0,60  | 1,52  | 0,10362 | NM_021133       | ---          |  |
| 8057574 | -0,44 | -1,36 | 0,25531 | -1,47 | -2,77 | 0,00156 | ---             | LOC100130794 |  |
| 8013858 | -0,44 | -1,36 | 0,43721 | -1,21 | -2,31 | 0,13686 | ENST00000437256 | POU1F1       |  |
| 8088986 | -0,44 | -1,36 | 0,29287 | -0,81 | -1,75 | 0,00375 | NM_001122757    | LRMP         |  |
| 7954436 | -0,44 | -1,36 | 0,19472 | -1,28 | -2,42 | 0,04867 | NM_006152       | LOC100134868 |  |
| 8065537 | -0,44 | -1,36 | 0,10166 | 1,89  | 3,70  | 0,04712 | NR_004846       | EYS          |  |
| 8127408 | -0,44 | -1,36 | 0,36766 | -0,90 | -1,87 | 0,04399 | NM_198283       | TET3         |  |
| 8042811 | -0,44 | -1,36 | 0,36006 | 0,24  | 1,18  | 0,69509 | NM_144993       | CUEDC1       |  |
| 8016878 | -0,44 | -1,36 | 0,27544 | -0,03 | -1,02 | 0,92160 | NM_017949       | DLEU2L       |  |
| 7901948 | -0,44 | -1,36 | 0,04297 | -1,05 | -2,07 | 0,03101 | NR_002771       | ---          |  |
| 8104490 | -0,44 | -1,36 | 0,03150 | -1,79 | -3,45 | 0,04439 | ---             | LOC440337    |  |
| 7993108 | -0,44 | -1,36 | 0,43233 | -1,59 | -3,02 | 0,00094 | AK094332        | ---          |  |
| 7924117 | -0,44 | -1,36 | 0,04641 | -1,11 | -2,15 | 0,00234 | ---             | EGF          |  |
| 8096845 | -0,44 | -1,36 | 0,04951 | 0,76  | 1,69  | 0,00968 | NM_001963       | OR2V1        |  |
| 8116500 | -0,44 | -1,36 | 0,55468 | -1,12 | -2,18 | 0,00207 | ENST00000329365 | CD3G         |  |
| 7944185 | -0,44 | -1,36 | 0,34131 | -1,23 | -2,35 | 0,03744 | NM_000073       | EPB42        |  |
| 7988033 | -0,44 | -1,36 | 0,02971 | -1,33 | -2,52 | 0,04180 | NM_000119       | SCN4A        |  |
| 8017521 | -0,44 | -1,36 | 0,11130 | -0,80 | -1,74 | 0,00237 | NM_000334       | ---          |  |
| 8115838 | -0,44 | -1,36 | 0,45871 | -1,06 | -2,09 | 0,06722 | ---             | PLCG2        |  |
| 7997453 | -0,44 | -1,36 | 0,00524 | -0,11 | -1,08 | 0,69081 | NM_002661       | NTNG2        |  |

|         |       |       |         |       |       |         |                 |           |
|---------|-------|-------|---------|-------|-------|---------|-----------------|-----------|
| 8158890 | -0,44 | -1,36 | 0,22974 | -1,34 | -2,54 | 0,00640 | NM_032536       | OR5AK2    |
| 7940000 | -0,44 | -1,36 | 0,34338 | -0,85 | -1,81 | 0,00189 | NM_001005323    | ABCC6P2   |
| 7999591 | -0,45 | -1,36 | 0,19146 | 0,26  | 1,20  | 0,51154 | NR_023387       | ---       |
| 8099537 | -0,45 | -1,36 | 0,25778 | -1,32 | -2,50 | 0,00914 | --- C4orf37     | ---       |
| 8101816 | -0,45 | -1,36 | 0,04681 | -0,67 | -1,59 | 0,00168 | NM_174952       | FEN1      |
| 7940561 | -0,45 | -1,36 | 0,12832 | 0,95  | 1,93  | 0,01955 | NM_004111       | CYP4X1    |
| 7901272 | -0,45 | -1,36 | 0,24638 | -0,27 | -1,21 | 0,06129 | NM_178033       | ---       |
| 8058106 | -0,45 | -1,36 | 0,23414 | -0,81 | -1,75 | 0,06276 | --- SEC31B      | ---       |
| 7935780 | -0,45 | -1,36 | 0,02466 | -0,43 | -1,35 | 0,14916 | NM_015490       | TGM4      |
| 8079279 | -0,45 | -1,36 | 0,18734 | -0,24 | -1,18 | 0,28076 | NM_003241       | ACTN2     |
| 7910727 | -0,45 | -1,36 | 0,17429 | -0,99 | -1,98 | 0,00602 | NM_001103       | GPER      |
| 8131069 | -0,45 | -1,36 | 0,14720 | -0,60 | -1,51 | 0,00608 | NM_001039966    | C17orf102 |
| 8014169 | -0,45 | -1,36 | 0,39363 | -2,17 | -4,50 | 0,00003 | NM_207454       | C14orf53  |
| 7975154 | -0,45 | -1,36 | 0,09387 | -0,89 | -1,85 | 0,02181 | NR_024338       | NEFH      |
| 8072229 | -0,45 | -1,36 | 0,08282 | -1,31 | -2,47 | 0,00000 | NM_021076       | C17orf77  |
| 8009662 | -0,45 | -1,36 | 0,19386 | -0,35 | -1,28 | 0,31150 | NM_152460       | GPR120    |
| 7929344 | -0,45 | -1,36 | 0,37640 | 1,33  | 2,52  | 0,03405 | NM_181745       | C18orf22  |
| 8021905 | -0,45 | -1,36 | 0,05411 | -0,25 | -1,19 | 0,55853 | NM_024805       | ---       |
| 8128886 | -0,45 | -1,36 | 0,20159 | -0,23 | -1,18 | 0,42425 | --- ACOT7       | ---       |
| 8099965 | -0,45 | -1,36 | 0,62875 | -0,07 | -1,05 | 0,92693 | NM_007274       | MRPS26    |
| 8060599 | -0,45 | -1,36 | 0,06443 | 1,31  | 2,49  | 0,00391 | NM_030811       | LOC401097 |
| 8083707 | -0,45 | -1,36 | 0,13728 | 0,18  | 1,14  | 0,47329 | NM_001168214    | ---       |
| 8087545 | -0,45 | -1,36 | 0,04367 | -1,37 | -2,59 | 0,04552 | --- KALRN       | ---       |
| 8082165 | -0,45 | -1,36 | 0,12110 | -1,13 | -2,19 | 0,00020 | NM_001024660    | ENPP4     |
| 8120061 | -0,45 | -1,36 | 0,26343 | 1,39  | 2,62  | 0,03931 | NM_014936       | RAB36     |
| 8071676 | -0,45 | -1,36 | 0,57198 | -1,00 | -1,99 | 0,09437 | NM_004914       | ZNF852    |
| 8086494 | -0,45 | -1,36 | 0,02338 | 0,66  | 1,58  | 0,23077 | AK296954 ---    | ---       |
| 8081454 | -0,45 | -1,36 | 0,58256 | -1,66 | -3,16 | 0,00739 | --- FSHR        | ---       |
| 8052072 | -0,45 | -1,36 | 0,14592 | -1,56 | -2,95 | 0,04917 | NM_000145       | CENPT     |
| 8002104 | -0,45 | -1,36 | 0,23510 | 1,28  | 2,42  | 0,04234 | NM_025082       | UBASH3A   |
| 8068788 | -0,45 | -1,36 | 0,07276 | -1,21 | -2,32 | 0,06825 | NM_018961       | C14orf39  |
| 7979483 | -0,45 | -1,36 | 0,17271 | -0,81 | -1,75 | 0,00431 | NM_174978       | MIR103-1  |
| 8115689 | -0,45 | -1,36 | 0,30194 | -0,68 | -1,61 | 0,06420 | NR_029520       | TACC3     |
| 8093500 | -0,45 | -1,36 | 0,18798 | 1,09  | 2,13  | 0,04247 | NM_006342       | SAMD7     |
| 8083814 | -0,45 | -1,36 | 0,53173 | -1,32 | -2,50 | 0,02221 | NM_182610       | ---       |
| 7980718 | -0,45 | -1,36 | 0,50697 | -0,84 | -1,80 | 0,15346 | --- TMEM119     | ---       |
| 7966122 | -0,45 | -1,36 | 0,41969 | -0,92 | -1,90 | 0,01399 | NM_181724       | MIR15A    |
| 7971661 | -0,45 | -1,36 | 0,05002 | -0,26 | -1,19 | 0,39520 | NR_029485       | ZNF132    |
| 8039771 | -0,45 | -1,36 | 0,13676 | -1,53 | -2,90 | 0,00532 | NM_003433       | ---       |
| 8173522 | -0,45 | -1,36 | 0,51452 | -2,38 | -5,19 | 0,15301 | --- ---         | ---       |
| 7905949 | -0,45 | -1,36 | 0,15296 | -0,43 | -1,34 | 0,09732 | --- ---         | ---       |
| 8176648 | -0,45 | -1,36 | 0,07943 | -0,42 | -1,34 | 0,20784 | --- MIR128-1    | ---       |
| 8045453 | -0,45 | -1,36 | 0,07483 | -0,93 | -1,90 | 0,00566 | NR_029672       | DEFB110   |
| 8126939 | -0,45 | -1,36 | 0,02290 | -0,58 | -1,50 | 0,00259 | NM_001037497    | CDCA7     |
| 8046488 | -0,45 | -1,36 | 0,19279 | 2,45  | 5,47  | 0,00028 | NM_031942       | CHIT1     |
| 7923562 | -0,45 | -1,36 | 0,28173 | -1,20 | -2,30 | 0,03257 | NM_003465       | HAVCR1    |
| 8115455 | -0,45 | -1,36 | 0,18505 | -0,50 | -1,41 | 0,03407 | NM_012206       | ANKRD20B  |
| 7919146 | -0,45 | -1,36 | 0,41309 | 0,20  | 1,15  | 0,72484 | NR_003366       | ZNF695    |
| 7925662 | -0,45 | -1,36 | 0,37652 | -0,34 | -1,26 | 0,19778 | NM_020394       | C13orf18  |
| 7971486 | -0,45 | -1,36 | 0,35920 | -0,86 | -1,81 | 0,00148 | NM_025113       | DAB2IP    |
| 8157610 | -0,45 | -1,36 | 0,12203 | 0,74  | 1,67  | 0,09284 | NM_032552       | ---       |
| 7919749 | -0,45 | -1,36 | 0,06965 | -1,02 | -2,03 | 0,00147 | --- ---         | ---       |
| 8054939 | -0,45 | -1,36 | 0,00898 | -0,41 | -1,33 | 0,08671 | --- C14orf145   | ---       |
| 7980496 | -0,45 | -1,36 | 0,26736 | 0,39  | 1,31  | 0,30906 | NM_152446       | IQCF1     |
| 8087782 | -0,45 | -1,36 | 0,26515 | -1,79 | -3,45 | 0,00014 | NM_152397       | BIN1      |
| 8054945 | -0,45 | -1,36 | 0,04712 | 0,00  | -1,00 | 0,99771 | NM_139343       | ---       |
| 7912762 | -0,45 | -1,36 | 0,40732 | 0,11  | 1,08  | 0,11313 | --- FAM135B     | ---       |
| 8153071 | -0,45 | -1,36 | 0,15558 | -0,78 | -1,71 | 0,00663 | NM_015912       | C3orf53   |
| 8085967 | -0,45 | -1,36 | 0,33341 | -1,44 | -2,72 | 0,02304 | ENST00000317800 | PTPRD     |
| 8160040 | -0,45 | -1,37 | 0,09391 | -1,21 | -2,31 | 0,00009 | NM_002839       | PIWIL4    |
| 7943240 | -0,45 | -1,37 | 0,18814 | -0,53 | -1,44 | 0,08362 | NM_152431       | KRT12     |
| 8015115 | -0,45 | -1,37 | 0,08760 | -0,73 | -1,65 | 0,02865 | NM_000223       | OR5M10    |
| 7948148 | -0,45 | -1,37 | 0,44855 | -2,39 | -5,25 | 0,04776 | NM_001004741    | PCLO      |
| 8140620 | -0,45 | -1,37 | 0,12579 | 0,87  | 1,82  | 0,01071 | NM_033026       | ABCD2     |
| 7962312 | -0,45 | -1,37 | 0,36803 | -0,49 | -1,40 | 0,00384 | NM_005164       | ---       |
| 8132849 | -0,45 | -1,37 | 0,48658 | -0,54 | -1,46 | 0,20493 | --- CCBP2       | ---       |
| 8079117 | -0,45 | -1,37 | 0,30088 | -0,68 | -1,60 | 0,02478 | NM_001296       | FLJ41309  |
| 8106727 | -0,45 | -1,37 | 0,16011 | -1,13 | -2,19 | 0,00332 | AK123303 ---    | ---       |
| 8048712 | -0,45 | -1,37 | 0,09035 | -1,45 | -2,74 | 0,00331 | --- SNN         | ---       |
| 7993259 | -0,45 | -1,37 | 0,48495 | -1,04 | -2,06 | 0,01333 | NM_003498       | DEFB127   |
| 8060314 | -0,45 | -1,37 | 0,02040 | -1,00 | -2,00 | 0,00103 | NM_139074       | IGLON5    |
| 8030823 | -0,45 | -1,37 | 0,55748 | 0,70  | 1,62  | 0,14871 | NM_001101372    | UGT2B17   |
| 8100734 | -0,45 | -1,37 | 0,16891 | -0,74 | -1,67 | 0,04271 | NM_001077       | ---       |

|         |       |       |         |       |       |         |                 |          |            |
|---------|-------|-------|---------|-------|-------|---------|-----------------|----------|------------|
| 8112996 | -0,45 | -1,37 | 0,08568 | -0,41 | -1,33 | 0,11280 | ---             | QRFPR    |            |
| 8102610 | -0,45 | -1,37 | 0,23882 | 0,07  | 1,05  | 0,73852 | NM_198179       |          | GRB2       |
| 8018364 | -0,45 | -1,37 | 0,02897 | 1,57  | 2,96  | 0,00319 | NM_002086       |          | CCDC142    |
| 8053171 | -0,45 | -1,37 | 0,08646 | 0,47  | 1,38  | 0,49134 | NM_032779       |          | NCRNA00028 |
| 8061539 | -0,45 | -1,37 | 0,52752 | -1,80 | -3,48 | 0,12386 | NR_024358       |          | F10        |
| 7970241 | -0,45 | -1,37 | 0,14009 | -0,95 | -1,93 | 0,03767 | NM_000504       |          | POF1B      |
| 8173869 | -0,45 | -1,37 | 0,36107 | -0,80 | -1,74 | 0,03194 | NM_024921       |          | SAPS1      |
| 8039413 | -0,45 | -1,37 | 0,10948 | 1,30  | 2,46  | 0,05055 | NM_014931       |          | FSIP2      |
| 8046824 | -0,45 | -1,37 | 0,11726 | 0,18  | 1,13  | 0,51828 | AK092099        | GSTA3    |            |
| 8127087 | -0,45 | -1,37 | 0,22999 | -0,67 | -1,59 | 0,01746 | NM_000847       |          | UNQ9370    |
| 7986291 | -0,45 | -1,37 | 0,23991 | -0,12 | -1,08 | 0,24477 | AY358254        | TBL1Y    |            |
| 8176442 | -0,45 | -1,37 | 0,11128 | -0,47 | -1,39 | 0,20426 | NM_033284       |          | OR6C76     |
| 7955997 | -0,45 | -1,37 | 0,09747 | -0,95 | -1,93 | 0,00406 | NM_001005183    |          | ---        |
| 8051775 | -0,45 | -1,37 | 0,09726 | -1,03 | -2,04 | 0,00199 | ---             | WFDC12   |            |
| 8066489 | -0,45 | -1,37 | 0,36277 | -0,35 | -1,27 | 0,31468 | NM_080869       |          | FBXO43     |
| 8152031 | -0,45 | -1,37 | 0,29284 | 0,94  | 1,92  | 0,00736 | NM_001077528    |          | PMM1       |
| 8076355 | -0,45 | -1,37 | 0,07406 | 0,93  | 1,90  | 0,02897 | NM_002676       |          | C6orf10    |
| 8125415 | -0,45 | -1,37 | 0,19669 | -1,23 | -2,34 | 0,00109 | NM_006781       |          | CSN3       |
| 8095477 | -0,45 | -1,37 | 0,19781 | -1,07 | -2,10 | 0,01286 | NM_005212       |          | MYLK2      |
| 8061605 | -0,45 | -1,37 | 0,10565 | -0,90 | -1,86 | 0,03518 | NM_033118       |          | C3orf49    |
| 8080868 | -0,45 | -1,37 | 0,04464 | -0,78 | -1,72 | 0,01143 | NR_026866       |          | LOC339524  |
| 7917466 | -0,45 | -1,37 | 0,43710 | -1,13 | -2,19 | 0,13267 | NR_026988       |          | PKHD1L1    |
| 8147891 | -0,45 | -1,37 | 0,08586 | -0,45 | -1,37 | 0,04872 | NM_177531       |          | C14orf43   |
| 7975626 | -0,45 | -1,37 | 0,29104 | -0,70 | -1,63 | 0,11547 | NM_194278       |          | ---        |
| 7980452 | -0,45 | -1,37 | 0,30673 | -1,93 | -3,82 | 0,00030 | ---             | PPP1R13B |            |
| 7981460 | -0,45 | -1,37 | 0,57958 | 2,47  | 5,53  | 0,00218 | NM_015316       |          | BRD7P3     |
| 8121727 | -0,45 | -1,37 | 0,10366 | -0,66 | -1,58 | 0,00126 | NR_002730       |          | UBE2C      |
| 8063043 | -0,45 | -1,37 | 0,18194 | 0,78  | 1,72  | 0,02640 | NM_181802       |          | GOLGA9P    |
| 7981859 | -0,45 | -1,37 | 0,36511 | -0,82 | -1,77 | 0,07189 | NR_024074       |          | FGR        |
| 7914112 | -0,45 | -1,37 | 0,44231 | -1,48 | -2,80 | 0,03009 | NM_005248       |          | ---        |
| 8089818 | -0,45 | -1,37 | 0,11967 | -0,94 | -1,91 | 0,06045 | ---             | RCVRN    |            |
| 8012598 | -0,45 | -1,37 | 0,47808 | -2,09 | -4,27 | 0,00084 | NM_002903       |          | CPA5       |
| 8136217 | -0,45 | -1,37 | 0,01683 | -1,18 | -2,27 | 0,01027 | NM_001127441    |          | ZC3H10     |
| 7956162 | -0,45 | -1,37 | 0,18894 | -1,23 | -2,35 | 0,09464 | NM_032786       |          | TSPAN16    |
| 8025858 | -0,45 | -1,37 | 0,33150 | -1,03 | -2,04 | 0,01406 | NM_012466       |          | ZNF642     |
| 7900446 | -0,45 | -1,37 | 0,12634 | 0,14  | 1,10  | 0,60530 | NM_198494       |          | SNORD45C   |
| 7902396 | -0,45 | -1,37 | 0,07927 | -0,23 | -1,18 | 0,25320 | NR_003042       |          | ---        |
| 8050213 | -0,45 | -1,37 | 0,52747 | -2,14 | -4,40 | 0,00335 | ---             | ---      |            |
| 8174634 | -0,45 | -1,37 | 0,07242 | -1,14 | -2,21 | 0,00547 | ---             | VSTM2A   |            |
| 8132851 | -0,45 | -1,37 | 0,31573 | -1,45 | -2,73 | 0,00437 | NM_182546       |          | ---        |
| 8082786 | -0,45 | -1,37 | 0,00999 | -1,02 | -2,03 | 0,02283 | ---             | NLGN4Y   |            |
| 8176655 | -0,45 | -1,37 | 0,18718 | -1,44 | -2,72 | 0,00027 | NR_028319       |          | RRP7A      |
| 8076455 | -0,45 | -1,37 | 0,28238 | 0,35  | 1,27  | 0,53511 | NM_015703       |          | HOXC11     |
| 7955855 | -0,45 | -1,37 | 0,15189 | -0,72 | -1,64 | 0,10187 | NM_014212       |          | OR1L8      |
| 8163960 | -0,45 | -1,37 | 0,56526 | -0,94 | -1,92 | 0,00322 | NM_001004454    |          | KIFC1      |
| 8179564 | -0,45 | -1,37 | 0,41197 | 1,71  | 3,28  | 0,00899 | NM_002263       |          | KCNK5      |
| 8126153 | -0,45 | -1,37 | 0,26081 | 1,11  | 2,15  | 0,05385 | NM_003740       |          | ---        |
| 8156058 | -0,45 | -1,37 | 0,11778 | -0,78 | -1,72 | 0,01407 | ---             | CDH9     |            |
| 8111271 | -0,45 | -1,37 | 0,12479 | -0,64 | -1,56 | 0,00061 | NM_016279       |          | ---        |
| 8050495 | -0,45 | -1,37 | 0,31657 | -0,80 | -1,74 | 0,04496 | ---             | SH3BGR   |            |
| 8068620 | -0,46 | -1,37 | 0,00646 | -0,55 | -1,46 | 0,08922 | NM_007341       |          | AGPAT2     |
| 8165258 | -0,46 | -1,37 | 0,25328 | 1,79  | 3,46  | 0,01375 | NM_006412       |          | KRTAP19-5  |
| 8069838 | -0,46 | -1,37 | 0,27598 | -1,51 | -2,86 | 0,00142 | NM_181611       |          | ---        |
| 8145797 | -0,46 | -1,37 | 0,23696 | -1,08 | -2,11 | 0,05906 | ---             | ---      |            |
| 7942781 | -0,46 | -1,37 | 0,05223 | -0,57 | -1,49 | 0,02934 | ---             | C1orf84  |            |
| 7900710 | -0,46 | -1,37 | 0,04057 | 0,13  | 1,09  | 0,63113 | NM_001012961    |          | CST9L      |
| 8065396 | -0,46 | -1,37 | 0,17918 | -0,74 | -1,67 | 0,03402 | NM_080610       |          | GALNT9     |
| 7967727 | -0,46 | -1,37 | 0,06570 | -1,27 | -2,41 | 0,05753 | NM_021808       |          | ---        |
| 7982495 | -0,46 | -1,37 | 0,21811 | -0,92 | -1,89 | 0,01194 | ---             | CHAT     |            |
| 7927482 | -0,46 | -1,37 | 0,29436 | -1,39 | -2,62 | 0,00739 | NM_001142933    |          | FTSJ2      |
| 8137826 | -0,46 | -1,37 | 0,15628 | 0,27  | 1,21  | 0,44723 | NM_013393       |          | AGAP5      |
| 7934451 | -0,46 | -1,37 | 0,23499 | 1,30  | 2,46  | 0,01105 | NM_001144000    |          | ---        |
| 7958844 | -0,46 | -1,37 | 0,24178 | -0,86 | -1,81 | 0,01254 | ---             | C9orf128 |            |
| 8161154 | -0,46 | -1,37 | 0,18293 | -1,18 | -2,27 | 0,01488 | NM_001012446    |          | C19orf43   |
| 8034514 | -0,46 | -1,37 | 0,48709 | -0,27 | -1,21 | 0,55627 | ENST00000242784 |          | APOL4      |
| 8075709 | -0,46 | -1,37 | 0,20867 | -0,66 | -1,58 | 0,00219 | NM_030643       |          | ---        |
| 7976261 | -0,46 | -1,37 | 0,05688 | -0,81 | -1,75 | 0,00081 | ---             | ---      |            |
| 7976126 | -0,46 | -1,37 | 0,07869 | -0,38 | -1,30 | 0,11436 | ---             | C9orf142 |            |
| 8159541 | -0,46 | -1,37 | 0,51728 | 1,30  | 2,46  | 0,15124 | BC002613        | C6orf163 |            |
| 8121009 | -0,46 | -1,37 | 0,09076 | -0,78 | -1,72 | 0,04305 | NM_001010868    |          | ---        |
| 7976576 | -0,46 | -1,37 | 0,05537 | -0,86 | -1,81 | 0,01186 | ---             | MYO5B    |            |
| 8023267 | -0,46 | -1,37 | 0,34020 | 0,97  | 1,96  | 0,00034 | NM_001080467    |          | ---        |
| 8085358 | -0,46 | -1,37 | 0,00712 | -0,54 | -1,46 | 0,12489 | ---             | LY6G6D   |            |

|                    |       |       |         |       |        |         |                                 |              |
|--------------------|-------|-------|---------|-------|--------|---------|---------------------------------|--------------|
| 8178070            | -0,46 | -1,37 | 0,28097 | -0,78 | -1,72  | 0,20810 | NM_021246                       | LY6G6D       |
| 8179309            | -0,46 | -1,37 | 0,28097 | -0,78 | -1,72  | 0,20810 | NM_021246                       | ---          |
| 8053386            | -0,46 | -1,37 | 0,02218 | -0,65 | -1,57  | 0,07140 | ---                             | METTL1       |
| 7964548            | -0,46 | -1,37 | 0,28201 | 0,93  | 1,90   | 0,13859 | NM_005371                       | GLYATL1      |
| 7940135            | -0,46 | -1,37 | 0,03839 | -1,71 | -3,28  | 0,00268 | NM_080661                       | LOC441056    |
| 8176570            | -0,46 | -1,37 | 0,73693 | -4,74 | -26,67 | 0,00000 | NM_001177376                    | BBS5         |
| 8046147            | -0,46 | -1,37 | 0,05495 | -0,07 | -1,05  | 0,75293 | NM_152384                       | ---          |
| 8118147            | -0,46 | -1,37 | 0,06871 | -0,79 | -1,73  | 0,19490 | ---                             | ---          |
| 7946123            | -0,46 | -1,37 | 0,26448 | -0,84 | -1,78  | 0,00926 | ---                             | GPLD1        |
| 8124211            | -0,46 | -1,37 | 0,03528 | -0,12 | -1,09  | 0,55194 | NM_001503                       | GRM3         |
| 8133904            | -0,46 | -1,37 | 0,45870 | -0,94 | -1,92  | 0,01336 | NM_000840                       | C16orf55     |
| 7997976            | -0,46 | -1,37 | 0,32603 | -0,36 | -1,28  | 0,45302 | AK303024                        | ---          |
| 7939990            | -0,46 | -1,37 | 0,10864 | -1,02 | -2,02  | 0,00809 | ---                             | GK2          |
| 8101256            | -0,46 | -1,37 | 0,22216 | -0,55 | -1,46  | 0,18054 | NM_033214                       | UGT2B10      |
| 8100768            | -0,46 | -1,37 | 0,45834 | -1,40 | -2,65  | 0,01014 | NM_001075                       | ACTL8        |
| 7898516            | -0,46 | -1,37 | 0,15901 | -0,79 | -1,73  | 0,04683 | NM_030812                       | LEAP2        |
| 8108006            | -0,46 | -1,37 | 0,27346 | -0,43 | -1,35  | 0,09411 | NM_052971                       | ---          |
| 8091188            | -0,46 | -1,37 | 0,03671 | -1,05 | -2,08  | 0,00745 | ---                             | PLA2G7       |
| 8126784            | -0,46 | -1,37 | 0,04149 | -0,65 | -1,57  | 0,08590 | NM_001168357                    | MIR9-2       |
| 8113037            | -0,46 | -1,37 | 0,09947 | -0,96 | -1,95  | 0,00144 | NR_030741                       | FAM172B      |
| 8081341            | -0,46 | -1,37 | 0,35975 | 1,02  | 2,03   | 0,10157 | AK127584                        | RAB44        |
| 8119096            | -0,46 | -1,37 | 0,04408 | -0,67 | -1,59  | 0,08516 | ENST00000355623                 | MYL1         |
| 8058604            | -0,46 | -1,37 | 0,11861 | -0,69 | -1,61  | 0,01941 | NM_079420                       | ACSM1        |
| 7999981            | -0,46 | -1,37 | 0,13693 | -0,95 | -1,93  | 0,03081 | NM_052956                       | ZFP82        |
| 8036309            | -0,46 | -1,37 | 0,26635 | 1,67  | 3,18   | 0,00475 | NM_133466                       | CHMP4C       |
| 8147057            | -0,46 | -1,37 | 0,05909 | 3,06  | 8,32   | 0,00025 | NM_152284                       | FAM75C1 //   |
| FAM75C1 // FAM75C1 |       |       |         |       |        |         |                                 |              |
| 8162214            | -0,46 | -1,38 | 0,24058 | -1,96 | -3,88  | 0,00210 | NM_001145124 // NM_001145124 // |              |
| NM_001145124       | ---   |       |         |       |        |         |                                 |              |
| 8084737            | -0,46 | -1,38 | 0,04364 | -1,13 | -2,19  | 0,08262 | ---                             | ---          |
| 8005510            | -0,46 | -1,38 | 0,20133 | -1,31 | -2,48  | 0,00135 | ---                             | ---          |
| 8013292            | -0,46 | -1,38 | 0,20133 | -1,31 | -2,48  | 0,00135 | ---                             | RPS17P5      |
| 8126946            | -0,46 | -1,38 | 0,28009 | -0,97 | -1,96  | 0,02181 | ENST00000331146                 | KIAA0802     |
| 8020037            | -0,46 | -1,38 | 0,22232 | 0,10  | 1,07   | 0,76381 | BC040542                        | FAM159B      |
| 8105607            | -0,46 | -1,38 | 0,16863 | -0,77 | -1,71  | 0,10274 | NM_001164442                    | MIR141       |
| 7953592            | -0,46 | -1,38 | 0,15142 | -1,12 | -2,17  | 0,01361 | NR_029682                       | GPR172B      |
| 8011808            | -0,46 | -1,38 | 0,31999 | -0,94 | -1,92  | 0,13837 | NM_001104577                    | CD1A         |
| 7906339            | -0,46 | -1,38 | 0,32750 | -1,36 | -2,57  | 0,04273 | NM_001763                       | OR5T3        |
| 7939973            | -0,46 | -1,38 | 0,19364 | -0,50 | -1,41  | 0,03497 | NM_001004747                    | TIAM1        |
| 8069880            | -0,46 | -1,38 | 0,36519 | 2,73  | 6,65   | 0,00031 | NM_003253                       | CENPA        |
| 8040712            | -0,46 | -1,38 | 0,28369 | 3,21  | 9,26   | 0,00157 | NM_001809                       | ---          |
| 7953198            | -0,46 | -1,38 | 0,00571 | 0,01  | 1,01   | 0,95533 | ---                             | C11orf66     |
| 7940493            | -0,46 | -1,38 | 0,23489 | 0,47  | 1,38   | 0,17874 | NM_145017                       | ANKRD20A2    |
| 8155602            | -0,46 | -1,38 | 0,26643 | -0,20 | -1,15  | 0,43832 | NM_001012421                    | ---          |
| 8137925            | -0,46 | -1,38 | 0,07901 | -1,21 | -2,31  | 0,00846 | ---                             | KRTAP4-12    |
| 8015223            | -0,46 | -1,38 | 0,71778 | -3,52 | -11,46 | 0,00003 | NM_031854                       | KRTAP4-12    |
| 8019565            | -0,46 | -1,38 | 0,71778 | -3,52 | -11,46 | 0,00003 | NM_031854                       | PJA1         |
| 8173340            | -0,46 | -1,38 | 0,41534 | -0,14 | -1,10  | 0,41586 | NM_145119                       | ORAI2        |
| 8135172            | -0,46 | -1,38 | 0,17408 | 0,59  | 1,51   | 0,20031 | NM_001126340                    | GNG3         |
| 7940673            | -0,46 | -1,38 | 0,50362 | -1,59 | -3,00  | 0,01614 | NM_012202                       | HIST1H2AB    |
| 8124391            | -0,46 | -1,38 | 0,20401 | -0,02 | -1,02  | 0,86844 | NM_003513                       | RBPMS2       |
| 7989670            | -0,46 | -1,38 | 0,12259 | 2,52  | 5,74   | 0,00013 | NM_194272                       | C1QTNF6      |
| 8075897            | -0,46 | -1,38 | 0,19081 | 1,14  | 2,20   | 0,01454 | NM_031910                       | LOXHD1       |
| 8023080            | -0,46 | -1,38 | 0,05607 | -0,75 | -1,68  | 0,00278 | NM_144612                       | MCM5         |
| 8072687            | -0,46 | -1,38 | 0,33331 | 1,88  | 3,69   | 0,01148 | NM_006739                       | MIR196A2     |
| 7955863            | -0,46 | -1,38 | 0,37139 | -0,57 | -1,48  | 0,12535 | NR_029617                       | ---          |
| 7899375            | -0,46 | -1,38 | 0,02335 | -0,60 | -1,51  | 0,36000 | ---                             | C22orf46     |
| 8073470            | -0,46 | -1,38 | 0,00851 | 0,36  | 1,29   | 0,03053 | NM_001142964                    | LSM14B       |
| 8067380            | -0,46 | -1,38 | 0,00491 | -1,18 | -2,27  | 0,11122 | NM_144703                       | HAP1         |
| 8015396            | -0,46 | -1,38 | 0,14586 | -0,35 | -1,28  | 0,42926 | NM_177977                       | HIST1H2AA    |
| 8124331            | -0,46 | -1,38 | 0,03978 | -0,59 | -1,51  | 0,07923 | NM_170745                       | BRD3         |
| 8164995            | -0,46 | -1,38 | 0,30156 | -0,27 | -1,21  | 0,24864 | NM_007371                       | CCL28        |
| 8111932            | -0,46 | -1,38 | 0,01281 | 2,35  | 5,11   | 0,00269 | NM_148672                       | FLJ36840     |
| 8144228            | -0,46 | -1,38 | 0,37110 | -0,01 | -1,01  | 0,98013 | AK094159                        | STARD9       |
| 7983143            | -0,46 | -1,38 | 0,31105 | -0,10 | -1,07  | 0,50405 | NM_020759                       | ZNF619       |
| 8078991            | -0,46 | -1,38 | 0,37441 | 0,25  | 1,19   | 0,32621 | NM_001145082                    | SLITRK2      |
| 8170307            | -0,46 | -1,38 | 0,27492 | -0,95 | -1,93  | 0,00150 | NM_032539                       | SLCSA2       |
| 7995222            | -0,46 | -1,38 | 0,38569 | -0,93 | -1,90  | 0,02016 | NM_003041                       | LRRC43       |
| 7959386            | -0,46 | -1,38 | 0,13234 | -1,16 | -2,24  | 0,03107 | NM_001098519                    | LDHAL6B      |
| 7983985            | -0,46 | -1,38 | 0,00919 | -1,41 | -2,66  | 0,00123 | NM_033195                       | LOC100128356 |
| 7931822            | -0,46 | -1,38 | 0,03030 | -0,48 | -1,39  | 0,01104 | AY423624                        | CELSR2       |
| 7903632            | -0,46 | -1,38 | 0,33174 | 0,77  | 1,71   | 0,08189 | NM_001408                       | PTPRH        |
| 8039389            | -0,46 | -1,38 | 0,09508 | 0,30  | 1,23   | 0,50545 | NM_002842                       | MAP3K14      |

|         |       |       |         |       |        |         |              |           |
|---------|-------|-------|---------|-------|--------|---------|--------------|-----------|
| 8016194 | -0,46 | -1,38 | 0,16807 | 0,78  | 1,72   | 0,10261 | NM_003954    | GJB3      |
| 7899932 | -0,46 | -1,38 | 0,04595 | -0,42 | -1,34  | 0,14930 | NM_024009    | LCE5A     |
| 7905483 | -0,46 | -1,38 | 0,45480 | -1,33 | -2,51  | 0,00240 | NM_178438    | YIF1B     |
| 8036483 | -0,46 | -1,38 | 0,34157 | 1,38  | 2,61   | 0,06291 | NM_033557    | MGC24125  |
| 8103906 | -0,46 | -1,38 | 0,24202 | -1,53 | -2,89  | 0,04136 | AK097110     | MIR205    |
| 7909422 | -0,46 | -1,38 | 0,27200 | -0,63 | -1,55  | 0,02328 | NR_029622    | ERCC3     |
| 8054995 | -0,46 | -1,38 | 0,03684 | -0,38 | -1,30  | 0,00450 | AK127469     | MUC21     |
| 8179224 | -0,46 | -1,38 | 0,55740 | -1,32 | -2,50  | 0,00093 | NM_001010909 | CAMTA2    |
| 8011774 | -0,46 | -1,38 | 0,15269 | 0,91  | 1,87   | 0,00461 | NM_015099    | CCDC23    |
| 7915468 | -0,46 | -1,38 | 0,42813 | 0,12  | 1,08   | 0,50557 | NM_199342    | ATP10A    |
| 7986789 | -0,46 | -1,38 | 0,21816 | 0,30  | 1,23   | 0,21170 | NM_024490    | ---       |
| 8160084 | -0,46 | -1,38 | 0,03795 | -0,35 | -1,28  | 0,03329 | ---          | ---       |
| 8063408 | -0,46 | -1,38 | 0,21290 | -0,09 | -1,07  | 0,81978 | ---          | BAI2      |
| 7914433 | -0,46 | -1,38 | 0,06528 | 0,24  | 1,18   | 0,40743 | NM_001703    | ---       |
| 7970082 | -0,46 | -1,38 | 0,30043 | -1,08 | -2,11  | 0,00579 | ---          | KRTAP4-11 |
| 8015221 | -0,46 | -1,38 | 0,81068 | -3,66 | -12,60 | 0,00121 | NM_033059    | PSCA      |
| 8153334 | -0,46 | -1,38 | 0,33310 | -0,42 | -1,33  | 0,11518 | NM_005672    | OR14J1    |
| 8117722 | -0,46 | -1,38 | 0,38721 | -0,99 | -1,99  | 0,01618 | NM_030946    | OR14J1    |
| 8177698 | -0,46 | -1,38 | 0,38721 | -0,99 | -1,99  | 0,01618 | NM_030946    | TSPYL4    |
| 8129089 | -0,46 | -1,38 | 0,33154 | 0,51  | 1,42   | 0,42652 | NM_021648    | SH2D1B    |
| 7921900 | -0,46 | -1,38 | 0,12966 | -1,00 | -2,00  | 0,03231 | NM_053282    | ---       |
| 7972287 | -0,47 | -1,38 | 0,04277 | -0,04 | -1,03  | 0,78239 | ---          | TM6SF2    |
| 8035648 | -0,47 | -1,38 | 0,26174 | -0,03 | -1,02  | 0,93129 | NM_001001524 | ESR2      |
| 7979583 | -0,47 | -1,38 | 0,21356 | -0,89 | -1,86  | 0,00097 | NM_001040275 | KIAA1009  |
| 8127903 | -0,47 | -1,38 | 0,17852 | -0,82 | -1,76  | 0,00985 | NM_014895    | DNAH1     |
| 8080226 | -0,47 | -1,38 | 0,01537 | 0,19  | 1,14   | 0,35464 | NM_015512    | ---       |
| 7937975 | -0,47 | -1,38 | 0,07914 | -1,28 | -2,42  | 0,00091 | ---          | SNORD104  |
| 8009241 | -0,47 | -1,38 | 0,29885 | -0,62 | -1,53  | 0,11226 | NR_004380    | C6orf142  |
| 8120300 | -0,47 | -1,38 | 0,00567 | -0,89 | -1,85  | 0,00066 | NM_138569    | AIFM2     |
| 7934101 | -0,47 | -1,38 | 0,25172 | 0,84  | 1,79   | 0,00769 | NM_032797    | ---       |
| 7903389 | -0,47 | -1,38 | 0,38614 | -1,57 | -2,97  | 0,01167 | ---          | SLC5A8    |
| 7965769 | -0,47 | -1,38 | 0,05263 | -0,88 | -1,85  | 0,03488 | NM_145913    | ---       |
| 8116908 | -0,47 | -1,38 | 0,05888 | -1,15 | -2,21  | 0,03198 | ---          | RHPN2     |
| 8035980 | -0,47 | -1,38 | 0,35505 | 3,77  | 13,66  | 0,00380 | NM_033103    | LOC400657 |
| 8023868 | -0,47 | -1,38 | 0,35432 | -0,26 | -1,19  | 0,38290 | NR_024484    | AGBL2     |
| 7947947 | -0,47 | -1,38 | 0,46476 | 1,30  | 2,47   | 0,07099 | NM_024783    | CAMK2B    |
| 8139330 | -0,47 | -1,38 | 0,07843 | 0,44  | 1,36   | 0,38811 | NM_001220    | AGAP6     |
| 7927552 | -0,47 | -1,38 | 0,35814 | 1,77  | 3,40   | 0,00319 | NM_001077665 | SNORD38B  |
| 7901052 | -0,47 | -1,38 | 0,22000 | -0,28 | -1,22  | 0,20370 | NR_001457    | POU6F1    |
| 7963265 | -0,47 | -1,38 | 0,31554 | 0,82  | 1,76   | 0,06417 | NR_026893    | OR11H1    |
| 7977450 | -0,47 | -1,38 | 0,41860 | -2,81 | -7,01  | 0,00468 | NM_001005239 | ---       |
| 8001325 | -0,47 | -1,38 | 0,02890 | -0,32 | -1,25  | 0,04884 | ---          | CCDC129   |
| 8132167 | -0,47 | -1,38 | 0,16360 | -1,36 | -2,57  | 0,00395 | NM_194300    | DNAJB2    |
| 8048523 | -0,47 | -1,38 | 0,20547 | -0,71 | -1,63  | 0,01410 | NM_006736    | LOC255411 |
| 7955135 | -0,47 | -1,38 | 0,04118 | -0,10 | -1,07  | 0,56814 | NR_029449    | EFHC2     |
| 8172225 | -0,47 | -1,38 | 0,04031 | -0,43 | -1,34  | 0,14992 | NM_025184    | ---       |
| 8040171 | -0,47 | -1,38 | 0,04938 | -0,73 | -1,66  | 0,00161 | ---          | TREM1     |
| 8126303 | -0,47 | -1,38 | 0,21350 | -0,64 | -1,56  | 0,01158 | NM_018643    | SLC46A1   |
| 8013616 | -0,47 | -1,38 | 0,32859 | 2,46  | 5,50   | 0,00788 | NM_080669    | ---       |
| 8002018 | -0,47 | -1,38 | 0,11870 | -0,46 | -1,38  | 0,01330 | ---          | EGR3      |
| 8149720 | -0,47 | -1,38 | 0,14500 | -0,90 | -1,86  | 0,00279 | NM_004430    | PON3      |
| 8141066 | -0,47 | -1,38 | 0,13055 | 2,72  | 6,61   | 0,00784 | NM_000940    | IRF6      |
| 7924058 | -0,47 | -1,38 | 0,24901 | 0,86  | 1,81   | 0,09942 | NM_006147    | SLC39A2   |
| 7973135 | -0,47 | -1,38 | 0,07920 | -1,35 | -2,55  | 0,02684 | NM_014579    | GPR183    |
| 7972557 | -0,47 | -1,38 | 0,09308 | -0,77 | -1,71  | 0,03021 | NM_004951    | LOC349196 |
| 8144420 | -0,47 | -1,38 | 0,72402 | -1,44 | -2,72  | 0,06805 | NR_027000    | LOC349196 |
| 8144494 | -0,47 | -1,38 | 0,72402 | -1,44 | -2,72  | 0,06805 | NR_027000    | USP49     |
| 8126347 | -0,47 | -1,38 | 0,12742 | -0,46 | -1,38  | 0,20625 | NM_018561    | C13orf39  |
| 7972665 | -0,47 | -1,38 | 0,10176 | -0,91 | -1,88  | 0,00034 | BC132748     | KCTD6     |
| 8080804 | -0,47 | -1,38 | 0,17553 | -0,77 | -1,71  | 0,19091 | NM_153331    | CRIP2     |
| 7977397 | -0,47 | -1,38 | 0,01471 | -0,28 | -1,22  | 0,22181 | NM_001312    | OVOS      |
| 7953873 | -0,47 | -1,38 | 0,16667 | 1,31  | 2,48   | 0,00376 | BX647938     | ---       |
| 8170702 | -0,47 | -1,38 | 0,14285 | -1,22 | -2,33  | 0,15061 | ---          | ---       |
| 8068520 | -0,47 | -1,38 | 0,03470 | -0,79 | -1,73  | 0,05253 | ---          | P2RY12    |
| 8091530 | -0,47 | -1,38 | 0,14944 | -1,56 | -2,96  | 0,00667 | NM_022788    | ---       |
| 7913803 | -0,47 | -1,38 | 0,01564 | -1,09 | -2,13  | 0,00159 | ---          | ---       |
| 8082236 | -0,47 | -1,39 | 0,09044 | -1,12 | -2,17  | 0,00540 | ---          | LOC257358 |
| 8109908 | -0,47 | -1,39 | 0,32095 | -0,91 | -1,88  | 0,02022 | AK093725     | SAA2      |
| 7946983 | -0,47 | -1,39 | 0,57322 | -1,53 | -2,88  | 0,02819 | NM_030754    | TTL11     |
| 8163916 | -0,47 | -1,39 | 0,43812 | -0,04 | -1,03  | 0,93581 | NM_001139442 | ---       |
| 7973350 | -0,47 | -1,39 | 0,04376 | -1,15 | -2,22  | 0,04949 | ---          | AKR7A3    |
| 7913146 | -0,47 | -1,39 | 0,54535 | -1,10 | -2,14  | 0,18145 | NM_012067    | ---       |
| 8097122 | -0,47 | -1,39 | 0,04419 | -0,32 | -1,25  | 0,06150 | ---          | ---       |

|         |       |       |         |       |        |         |                 |           |  |
|---------|-------|-------|---------|-------|--------|---------|-----------------|-----------|--|
| 7938588 | -0,47 | -1,39 | 0,01023 | -0,85 | -1,80  | 0,00946 | ---             | ---       |  |
| 8014664 | -0,47 | -1,39 | 0,60706 | -3,14 | -8,79  | 0,00317 | ---             | ---       |  |
| 8019649 | -0,47 | -1,39 | 0,60706 | -3,14 | -8,79  | 0,00317 | ---             | RPSAP15   |  |
| 8173912 | -0,47 | -1,39 | 0,13153 | -0,82 | -1,77  | 0,14614 | AF284768        | NOP16     |  |
| 8115907 | -0,47 | -1,39 | 0,23138 | 0,45  | 1,37   | 0,12479 | NM_016391       | SP140     |  |
| 8048898 | -0,47 | -1,39 | 0,00004 | -1,09 | -2,13  | 0,00003 | NM_007237       | ---       |  |
| 8044791 | -0,47 | -1,39 | 0,40503 | -0,96 | -1,95  | 0,05816 | ---             | FAM194A   |  |
| 8091469 | -0,47 | -1,39 | 0,26276 | -0,62 | -1,54  | 0,14573 | NM_152394       | FSTL3     |  |
| 8023995 | -0,47 | -1,39 | 0,56736 | 1,96  | 3,89   | 0,05673 | NM_005860       | CCDC29    |  |
| 8020349 | -0,47 | -1,39 | 0,32424 | 0,32  | 1,24   | 0,44070 | ENST00000333394 | ACAN      |  |
| 7985786 | -0,47 | -1,39 | 0,23196 | -1,14 | -2,20  | 0,00310 | NM_013227       | CNNM3     |  |
| 8043666 | -0,47 | -1,39 | 0,08385 | 0,63  | 1,54   | 0,07572 | NM_017623       | C9        |  |
| 8111757 | -0,47 | -1,39 | 0,13996 | -0,65 | -1,57  | 0,01393 | NM_001737       | NTRK3     |  |
| 7991186 | -0,47 | -1,39 | 0,16749 | -1,33 | -2,51  | 0,00045 | NM_001007156    | KCNQ3     |  |
| 8152946 | -0,47 | -1,39 | 0,25067 | 0,61  | 1,52   | 0,05429 | NM_004519       | ---       |  |
| 7979800 | -0,47 | -1,39 | 0,20439 | -0,83 | -1,78  | 0,00224 | ---             | MPND      |  |
| 8024829 | -0,47 | -1,39 | 0,07331 | -0,31 | -1,24  | 0,68754 | NM_032868       | ---       |  |
| 8055948 | -0,47 | -1,39 | 0,23144 | -0,74 | -1,67  | 0,09598 | ---             | C2orf73   |  |
| 8041987 | -0,47 | -1,39 | 0,20773 | -0,53 | -1,44  | 0,02525 | NM_001100396    | ---       |  |
| 8097685 | -0,47 | -1,39 | 0,13804 | -0,99 | -1,99  | 0,00421 | ---             | ---       |  |
| 7954695 | -0,47 | -1,39 | 0,24135 | -0,77 | -1,71  | 0,05807 | ---             | MURC      |  |
| 8156919 | -0,47 | -1,39 | 0,09528 | -0,94 | -1,91  | 0,02131 | NM_001018116    | UGT2B28   |  |
| 8095404 | -0,47 | -1,39 | 0,20528 | -0,76 | -1,69  | 0,02209 | NM_053039       | ---       |  |
| 8119235 | -0,47 | -1,39 | 0,00604 | -0,60 | -1,52  | 0,10656 | ---             | MAGOH     |  |
| 7916274 | -0,47 | -1,39 | 0,12408 | -0,02 | -1,01  | 0,93169 | NM_002370       | LOC374491 |  |
| 7968056 | -0,47 | -1,39 | 0,31818 | 0,14  | 1,10   | 0,72166 | NR_002815       | ABCB9     |  |
| 7967337 | -0,47 | -1,39 | 0,06623 | 0,07  | 1,05   | 0,86395 | NM_019625       | KCNK1     |  |
| 7910611 | -0,47 | -1,39 | 0,23396 | 0,56  | 1,48   | 0,11217 | NM_002245       | TAC1      |  |
| 8134420 | -0,47 | -1,39 | 0,06132 | -0,75 | -1,69  | 0,00238 | NM_003182       | HIST1H2BO |  |
| 8117614 | -0,47 | -1,39 | 0,51952 | -0,75 | -1,68  | 0,03829 | NM_003527       | DUSP13    |  |
| 7934533 | -0,47 | -1,39 | 0,23617 | -0,82 | -1,76  | 0,04255 | NM_001007271    | CXorf59   |  |
| 8166690 | -0,47 | -1,39 | 0,14570 | -0,32 | -1,25  | 0,25010 | NM_173695       | TRMT2A    |  |
| 8074541 | -0,47 | -1,39 | 0,06671 | 0,38  | 1,30   | 0,56919 | NM_022727       | ANP32D    |  |
| 7955117 | -0,47 | -1,39 | 0,21533 | -0,58 | -1,49  | 0,01114 | NM_012404       | ---       |  |
| 7914748 | -0,47 | -1,39 | 0,37862 | -1,02 | -2,03  | 0,01283 | ---             | C3orf48   |  |
| 8085749 | -0,47 | -1,39 | 0,19607 | -1,08 | -2,12  | 0,03834 | NR_027694       | SNORA6    |  |
| 8078916 | -0,47 | -1,39 | 0,56556 | -0,05 | -1,03  | 0,92545 | NR_002325       | CYP11B1   |  |
| 8153363 | -0,47 | -1,39 | 0,37394 | -1,69 | -3,22  | 0,00004 | NM_000497       | ---       |  |
| 8064188 | -0,47 | -1,39 | 0,59489 | -1,91 | -3,76  | 0,00155 | ---             | ---       |  |
| 7904572 | -0,47 | -1,39 | 0,51377 | 1,36  | 2,56   | 0,05053 | ---             | ---       |  |
| 7952733 | -0,47 | -1,39 | 0,47572 | -1,49 | -2,81  | 0,00341 | ---             | KCTD16    |  |
| 8108905 | -0,47 | -1,39 | 0,47165 | -0,43 | -1,35  | 0,02093 | NM_020768       | SLC25A35  |  |
| 8012450 | -0,47 | -1,39 | 0,15262 | 0,92  | 1,90   | 0,03799 | NM_201520       | ---       |  |
| 8113724 | -0,47 | -1,39 | 0,18353 | -1,26 | -2,39  | 0,05034 | ---             | OR9A2     |  |
| 8143555 | -0,47 | -1,39 | 0,24617 | -0,93 | -1,91  | 0,00550 | NM_001001658    | RNU105C   |  |
| 8146456 | -0,47 | -1,39 | 0,23339 | -0,43 | -1,35  | 0,10258 | NR_004385       | ---       |  |
| 7899955 | -0,47 | -1,39 | 0,71313 | -3,40 | -10,56 | 0,00094 | ---             | CNNM4     |  |
| 8043657 | -0,47 | -1,39 | 0,07644 | 2,41  | 5,30   | 0,00020 | NM_020184       | ---       |  |
| 7955140 | -0,48 | -1,39 | 0,04979 | -0,77 | -1,71  | 0,11535 | ---             | EPHA3     |  |
| 8081081 | -0,48 | -1,39 | 0,07287 | -1,28 | -2,43  | 0,00407 | NM_005233       | C8orf12   |  |
| 8144621 | -0,48 | -1,39 | 0,09290 | -0,37 | -1,29  | 0,05314 | NR_026814       | ---       |  |
| 8085529 | -0,48 | -1,39 | 0,08972 | -1,24 | -2,37  | 0,00631 | ---             | RPA3      |  |
| 8138189 | -0,48 | -1,39 | 0,15591 | -0,20 | -1,15  | 0,75178 | NM_002947       | ZNF767    |  |
| 8143733 | -0,48 | -1,39 | 0,30302 | 0,66  | 1,58   | 0,26448 | NR_027788       | SERPINB13 |  |
| 8021603 | -0,48 | -1,39 | 0,39058 | -0,90 | -1,86  | 0,00035 | NM_012397       | KRTAP2-4  |  |
| 8015210 | -0,48 | -1,39 | 0,27953 | -1,99 | -3,98  | 0,00108 | NM_033184       | KRTAP2-4  |  |
| 8019576 | -0,48 | -1,39 | 0,27953 | -1,99 | -3,98  | 0,00108 | NM_033184       | GBA3      |  |
| 8094361 | -0,48 | -1,39 | 0,04196 | -0,18 | -1,13  | 0,14090 | NM_020973       | TMPRSS12  |  |
| 7955433 | -0,48 | -1,39 | 0,03566 | -1,22 | -2,34  | 0,07977 | NM_182559       | ATXN7L1   |  |
| 8142104 | -0,48 | -1,39 | 0,12861 | 0,56  | 1,48   | 0,27979 | NM_152749       | PRLR      |  |
| 8111490 | -0,48 | -1,39 | 0,43131 | -1,48 | -2,80  | 0,00905 | NM_000949       | ---       |  |
| 8003769 | -0,48 | -1,39 | 0,03286 | -1,19 | -2,28  | 0,03645 | ---             | SPINLW1   |  |
| 8066542 | -0,48 | -1,39 | 0,03705 | -0,26 | -1,19  | 0,02268 | NM_020398       | RNF166    |  |
| 8003348 | -0,48 | -1,39 | 0,30555 | -0,33 | -1,26  | 0,25365 | NM_178841       | ---       |  |
| 7926297 | -0,48 | -1,39 | 0,57739 | -1,30 | -2,46  | 0,00513 | ---             | MEX3B     |  |
| 7990873 | -0,48 | -1,39 | 0,22282 | -0,56 | -1,48  | 0,29630 | NM_032246       | RGS21     |  |
| 7908382 | -0,48 | -1,39 | 0,00657 | -0,64 | -1,56  | 0,00841 | NM_001039152    | FREM1     |  |
| 8160168 | -0,48 | -1,39 | 0,09689 | -0,85 | -1,80  | 0,00867 | NM_144966       | CSF2      |  |
| 8107887 | -0,48 | -1,39 | 0,43505 | -1,07 | -2,09  | 0,00754 | NM_000758       | C6orf97   |  |
| 8122827 | -0,48 | -1,39 | 0,09018 | -0,89 | -1,85  | 0,02720 | NM_025059       | LOC349196 |  |
| 8149165 | -0,48 | -1,39 | 0,72535 | -1,31 | -2,48  | 0,10388 | NR_027000       | LOC349196 |  |
| 8149167 | -0,48 | -1,39 | 0,72535 | -1,31 | -2,48  | 0,10388 | NR_027000       | FBLN7     |  |
| 8044440 | -0,48 | -1,39 | 0,51021 | 2,04  | 4,10   | 0,00223 | NM_153214       | HS1BP3    |  |

|         |       |       |         |       |       |         |                 |              |
|---------|-------|-------|---------|-------|-------|---------|-----------------|--------------|
| 8050594 | -0,48 | -1,39 | 0,07016 | 0,06  | 1,04  | 0,82740 | NM_022460       | SCUBE1       |
| 8076586 | -0,48 | -1,39 | 0,39415 | -0,85 | -1,80 | 0,04467 | NM_173050       | LGR6         |
| 7908816 | -0,48 | -1,39 | 0,02628 | 0,96  | 1,94  | 0,01602 | NM_001017403    | C10orf82     |
| 7936507 | -0,48 | -1,39 | 0,42576 | -1,51 | -2,84 | 0,00006 | BC021737        | INTU         |
| 8097307 | -0,48 | -1,39 | 0,35416 | 0,95  | 1,93  | 0,04014 | NM_015693       | OBFC1        |
| 7936134 | -0,48 | -1,39 | 0,32737 | 0,55  | 1,47  | 0,06299 | NM_024928       | CSRP3        |
| 7947099 | -0,48 | -1,39 | 0,22281 | -0,84 | -1,80 | 0,01293 | NM_003476       | ---          |
| 7912531 | -0,48 | -1,39 | 0,08420 | -0,68 | -1,60 | 0,00091 | ---             | UNQ6975      |
| 8051956 | -0,48 | -1,39 | 0,13709 | -1,13 | -2,19 | 0,01217 | AY358255        | TRIM52       |
| 8116534 | -0,48 | -1,39 | 0,09301 | 0,47  | 1,38  | 0,06121 | NM_032765       | ZSCAN5B      |
| 8039574 | -0,48 | -1,39 | 0,12630 | -1,37 | -2,59 | 0,03083 | NM_001080456    | DNAH9        |
| 8004957 | -0,48 | -1,39 | 0,28785 | -1,26 | -2,40 | 0,00026 | NM_001372       | C14orf57     |
| 7979959 | -0,48 | -1,39 | 0,02987 | -1,62 | -3,07 | 0,00310 | ENST00000416212 | NELL2        |
| 7962455 | -0,48 | -1,39 | 0,19371 | -0,52 | -1,44 | 0,03742 | NM_006159       | OTUD7B       |
| 7919699 | -0,48 | -1,39 | 0,33294 | 0,20  | 1,15  | 0,54460 | NM_020205       | SERPINB2     |
| 8021635 | -0,48 | -1,39 | 0,06250 | -1,50 | -2,82 | 0,00059 | NM_001143818    | C20orf26     |
| 8061272 | -0,48 | -1,39 | 0,20474 | -0,22 | -1,17 | 0,43536 | NM_015585       | ESR1         |
| 8122843 | -0,48 | -1,39 | 0,18935 | -1,22 | -2,33 | 0,00031 | NM_000125       | NCRNA00204   |
| 8176155 | -0,48 | -1,39 | 0,09796 | -0,29 | -1,23 | 0,21408 | AY168775        | ---          |
| 7968759 | -0,48 | -1,39 | 0,18409 | -1,14 | -2,21 | 0,01580 | ---             | ALOX12       |
| 8004221 | -0,48 | -1,39 | 0,00721 | -0,82 | -1,77 | 0,09345 | NM_000697       | CLEC9A       |
| 7953924 | -0,48 | -1,39 | 0,17948 | -0,77 | -1,71 | 0,14864 | NM_207345       | ---          |
| 7975309 | -0,48 | -1,39 | 0,16704 | -0,40 | -1,32 | 0,12328 | ---             | NOP2         |
| 7960575 | -0,48 | -1,39 | 0,41475 | 1,35  | 2,55  | 0,02010 | NM_001033714    | ---          |
| 7929956 | -0,48 | -1,39 | 0,15061 | -1,22 | -2,34 | 0,01404 | ---             | LOC100131642 |
| 8065120 | -0,48 | -1,39 | 0,36293 | -0,44 | -1,36 | 0,09641 | AF258585        | ---          |
| 8134678 | -0,48 | -1,39 | 0,02209 | -1,17 | -2,25 | 0,04691 | ---             | LOC100288778 |
| 8171066 | -0,48 | -1,39 | 0,54395 | 0,90  | 1,87  | 0,04021 | NR_028269       | ---          |
| 8133845 | -0,48 | -1,39 | 0,25613 | -0,77 | -1,70 | 0,03296 | ---             | C19orf63     |
| 8038565 | -0,48 | -1,39 | 0,48133 | -1,78 | -3,43 | 0,00231 | NM_206538       | ---          |
| 7919390 | -0,48 | -1,39 | 0,27799 | 0,01  | 1,01  | 0,97080 | ---             | IL12RB2      |
| 7902205 | -0,48 | -1,39 | 0,13858 | -0,27 | -1,20 | 0,42447 | NM_001559       | ---          |
| 8050761 | -0,48 | -1,39 | 0,12524 | -1,43 | -2,69 | 0,04330 | ---             | CDKL1        |
| 7978970 | -0,48 | -1,39 | 0,17587 | -0,23 | -1,18 | 0,45674 | NM_004196       | CCIN         |
| 8155200 | -0,48 | -1,39 | 0,06951 | -0,55 | -1,46 | 0,03466 | NM_005893       | FUT7         |
| 8159549 | -0,48 | -1,39 | 0,43950 | -0,26 | -1,20 | 0,26973 | NM_004479       | CA14         |
| 7905131 | -0,48 | -1,39 | 0,22151 | -1,29 | -2,44 | 0,00099 | NM_012113       | LOC349196    |
| 8149216 | -0,48 | -1,39 | 0,71122 | -1,41 | -2,65 | 0,08430 | NR_027000       | ZNF665       |
| 8039062 | -0,48 | -1,39 | 0,23451 | -1,00 | -2,00 | 0,00910 | NM_024733       | SERTAD1      |
| 8036902 | -0,48 | -1,40 | 0,03007 | 0,07  | 1,05  | 0,91495 | NM_013376       | OR1B1        |
| 8163962 | -0,48 | -1,40 | 0,04568 | -1,12 | -2,17 | 0,00770 | NM_001004450    | PAX9         |
| 7973974 | -0,48 | -1,40 | 0,05454 | 0,98  | 1,97  | 0,05642 | NM_006194       | C3AR1        |
| 7960874 | -0,48 | -1,40 | 0,00190 | -1,16 | -2,24 | 0,03238 | NM_004054       | NCRNA00158   |
| 8069612 | -0,48 | -1,40 | 0,22817 | -1,72 | -3,29 | 0,00202 | NR_024027       | C14orf105    |
| 7979378 | -0,48 | -1,40 | 0,07108 | -1,43 | -2,69 | 0,00027 | NM_018168       | MRPS12       |
| 8028563 | -0,48 | -1,40 | 0,34255 | 0,98  | 1,97  | 0,03474 | NM_021107       | CD244        |
| 7921677 | -0,48 | -1,40 | 0,08757 | -1,13 | -2,19 | 0,00018 | NM_016382       | PMFBP1       |
| 8002667 | -0,48 | -1,40 | 0,18792 | 0,19  | 1,14  | 0,52962 | NM_031293       | ---          |
| 8121298 | -0,48 | -1,40 | 0,25542 | -1,61 | -3,04 | 0,00050 | ---             | SLC2A7       |
| 7912211 | -0,48 | -1,40 | 0,30891 | -0,44 | -1,35 | 0,13277 | NM_207420       | HOOK2        |
| 8034521 | -0,48 | -1,40 | 0,52431 | 1,00  | 2,00  | 0,01076 | NM_013312       | CSTA         |
| 8082058 | -0,48 | -1,40 | 0,28101 | -1,86 | -3,63 | 0,00039 | NM_005213       | FGF9         |
| 7967993 | -0,48 | -1,40 | 0,35930 | -0,66 | -1,58 | 0,01090 | NM_002010       | SPG7         |
| 7997909 | -0,48 | -1,40 | 0,05345 | 0,64  | 1,56  | 0,07627 | NM_003119       | C2orf77      |
| 8056710 | -0,48 | -1,40 | 0,06158 | -1,06 | -2,08 | 0,00034 | NM_001085447    | LOC283174    |
| 7952805 | -0,48 | -1,40 | 0,38846 | 0,38  | 1,30  | 0,05377 | NR_024344       | MLYCD        |
| 7997525 | -0,48 | -1,40 | 0,12684 | 1,25  | 2,38  | 0,01051 | NM_012213       | HORMAD1      |
| 7919787 | -0,48 | -1,40 | 0,07760 | -0,56 | -1,47 | 0,07928 | NM_032132       | SERPINA4     |
| 7976481 | -0,48 | -1,40 | 0,10138 | -1,24 | -2,37 | 0,00038 | NM_006215       | AGAP7        |
| 7933574 | -0,48 | -1,40 | 0,36938 | 1,68  | 3,21  | 0,00120 | NM_001077685    | ---          |
| 8124305 | -0,48 | -1,40 | 0,26237 | -1,18 | -2,26 | 0,06343 | ---             | NCRNA00161   |
| 8068057 | -0,48 | -1,40 | 0,31276 | -1,27 | -2,42 | 0,10821 | NR_026552       | NRM          |
| 8124806 | -0,48 | -1,40 | 0,02809 | 1,82  | 3,53  | 0,04970 | NM_007243       | KCND3        |
| 7918558 | -0,48 | -1,40 | 0,13675 | -1,10 | -2,14 | 0,04992 | NM_004980       | AXIN1        |
| 7998211 | -0,48 | -1,40 | 0,09583 | 1,37  | 2,58  | 0,07862 | NM_003502       | C1orf115     |
| 7909862 | -0,48 | -1,40 | 0,28281 | 1,04  | 2,06  | 0,01640 | NM_024709       | SNORA36A     |
| 8170990 | -0,48 | -1,40 | 0,26378 | -0,80 | -1,74 | 0,07415 | NR_002969       | LLGL1        |
| 8005407 | -0,48 | -1,40 | 0,06455 | 1,21  | 2,31  | 0,05592 | NM_004140       | LUZP3P       |
| 8079420 | -0,48 | -1,40 | 0,46350 | -0,56 | -1,47 | 0,03972 | AJ312775        | ---          |
| 8035956 | -0,48 | -1,40 | 0,29816 | -1,44 | -2,71 | 0,09324 | ---             | ---          |
| 7928367 | -0,48 | -1,40 | 0,22742 | -0,75 | -1,68 | 0,38792 | ---             | SPATA8       |
| 7986340 | -0,48 | -1,40 | 0,01052 | -1,22 | -2,32 | 0,00138 | NM_173499       | ---          |
| 8083893 | -0,48 | -1,40 | 0,13379 | -0,72 | -1,65 | 0,00176 | ---             | TNRC18       |

|         |       |       |         |       |       |         |                        |                    |
|---------|-------|-------|---------|-------|-------|---------|------------------------|--------------------|
| 8132980 | -0,48 | -1,40 | 0,32141 | 0,22  | 1,16  | 0,77067 | NM_001080495           | ---                |
| 7983987 | -0,48 | -1,40 | 0,12765 | -1,42 | -2,67 | 0,05001 | ---                    | MYH15              |
| 8089329 | -0,48 | -1,40 | 0,03759 | -0,59 | -1,50 | 0,01881 | NM_014981              | DPM3               |
| 7920633 | -0,48 | -1,40 | 0,17113 | 0,37  | 1,30  | 0,31260 | NM_018973              | MAB21L2            |
| 8097773 | -0,48 | -1,40 | 0,26907 | -1,13 | -2,19 | 0,02721 | NM_006439              | ---                |
| 7970905 | -0,48 | -1,40 | 0,05388 | -0,52 | -1,44 | 0,05603 | ---                    | ---                |
| 7917726 | -0,48 | -1,40 | 0,22992 | -0,87 | -1,82 | 0,04422 | ---                    | ZNF814             |
| 8039692 | -0,48 | -1,40 | 0,71408 | -0,75 | -1,68 | 0,10427 | NM_001144989           | ---                |
| 7969701 | -0,48 | -1,40 | 0,00285 | -0,82 | -1,76 | 0,03138 | ---                    | ---                |
| 7952795 | -0,48 | -1,40 | 0,48390 | -1,18 | -2,26 | 0,02557 | ---                    | TTY8               |
| 8176553 | -0,48 | -1,40 | 0,02810 | -1,09 | -2,13 | 0,00000 | NR_001533              | TTY8               |
| 8177048 | -0,48 | -1,40 | 0,02810 | -1,09 | -2,13 | 0,00000 | NR_001533              | ---                |
| 8006834 | -0,48 | -1,40 | 0,17554 | -1,43 | -2,70 | 0,00898 | ---                    | GSG1L              |
| 8000467 | -0,48 | -1,40 | 0,32293 | -0,86 | -1,81 | 0,02323 | NM_001109763           | MIR181A2           |
| 8157800 | -0,48 | -1,40 | 0,07018 | -0,84 | -1,79 | 0,00767 | NR_029611              | SLC7A9             |
| 8035941 | -0,48 | -1,40 | 0,29657 | -0,91 | -1,88 | 0,02395 | NM_014270              | NMUR1              |
| 8059720 | -0,48 | -1,40 | 0,27839 | -0,11 | -1,08 | 0,59893 | NM_006056              | CTDP1              |
| 8021884 | -0,48 | -1,40 | 0,01942 | -0,26 | -1,20 | 0,31689 | NM_004715              | OAZ3               |
| 7905474 | -0,48 | -1,40 | 0,05357 | -0,52 | -1,43 | 0,12784 | NM_016178              | LOC100132005       |
| 8119237 | -0,48 | -1,40 | 0,41159 | -0,85 | -1,80 | 0,00101 | AK092662               | WFDC5              |
| 8066482 | -0,48 | -1,40 | 0,43080 | -0,65 | -1,57 | 0,29376 | NM_145652              | OR1J1              |
| 8163956 | -0,48 | -1,40 | 0,35716 | -1,02 | -2,03 | 0,02323 | NM_001004451           | ZMYND12            |
| 7915425 | -0,48 | -1,40 | 0,13979 | -0,83 | -1,78 | 0,00536 | NM_032257              | FAM160B2           |
| 8145027 | -0,48 | -1,40 | 0,02987 | 0,16  | 1,11  | 0,81106 | NM_022749              | KIAA1210           |
| 8174670 | -0,48 | -1,40 | 0,01818 | -1,15 | -2,23 | 0,04881 | NM_020721              | ---                |
| 7942287 | -0,48 | -1,40 | 0,26576 | -1,57 | -2,96 | 0,03271 | ---                    | ---                |
| 8044931 | -0,48 | -1,40 | 0,07610 | -0,65 | -1,57 | 0,00998 | ---                    | TECPR1             |
| 8141180 | -0,49 | -1,40 | 0,26382 | 0,01  | 1,00  | 0,98279 | NM_015395              | IL28RA             |
| 7913776 | -0,49 | -1,40 | 0,07234 | -0,12 | -1,09 | 0,76333 | NM_170743              | ANKRD20B           |
| 8155414 | -0,49 | -1,40 | 0,13546 | 0,28  | 1,21  | 0,40154 | NR_003366              | CCDC29             |
| 8161384 | -0,49 | -1,40 | 0,13546 | 0,28  | 1,21  | 0,40154 | ENST00000340460        | C3orf15            |
| 8081903 | -0,49 | -1,40 | 0,24641 | -0,58 | -1,49 | 0,06799 | NM_033364              | FAM71A             |
| 7924163 | -0,49 | -1,40 | 0,24928 | -1,53 | -2,89 | 0,02246 | NM_153606              | NLRCS              |
| 7995926 | -0,49 | -1,40 | 0,01075 | -0,15 | -1,11 | 0,54882 | NM_032206              | ACSBG2             |
| 8025011 | -0,49 | -1,40 | 0,05249 | -0,92 | -1,89 | 0,00990 | NM_030924              | S100A1             |
| 7905581 | -0,49 | -1,40 | 0,07228 | -0,09 | -1,07 | 0,57602 | NM_006271              | CBPPE              |
| 7977928 | -0,49 | -1,40 | 0,33383 | -0,71 | -1,63 | 0,18020 | NM_001805              | ---                |
| 7997738 | -0,49 | -1,40 | 0,31414 | -1,34 | -2,52 | 0,00637 | ---                    | ALOX15             |
| 8011680 | -0,49 | -1,40 | 0,34941 | -0,84 | -1,78 | 0,10419 | NM_001140              | RPL36              |
| 8024966 | -0,49 | -1,40 | 0,05044 | 0,32  | 1,25  | 0,40750 | NM_015414              | LOC100128751       |
| 7907090 | -0,49 | -1,40 | 0,12275 | -1,45 | -2,73 | 0,01158 | AY194294               | LYPD3              |
| 8037301 | -0,49 | -1,40 | 0,19590 | 1,54  | 2,90  | 0,00731 | NM_014400              | ---                |
| 8065122 | -0,49 | -1,40 | 0,27937 | -0,20 | -1,15 | 0,18386 | ---                    | ---                |
| 7939418 | -0,49 | -1,40 | 0,13525 | -1,27 | -2,41 | 0,00782 | ---                    | ---                |
| 8090341 | -0,49 | -1,40 | 0,09519 | -0,70 | -1,62 | 0,03060 | ---                    | MED12L             |
| 8083360 | -0,49 | -1,40 | 0,14719 | 1,00  | 1,99  | 0,00029 | NM_053002              | SLITRK1            |
| 7972231 | -0,49 | -1,40 | 0,08145 | -1,23 | -2,35 | 0,00437 | NM_052910              | ---                |
| 8081331 | -0,49 | -1,40 | 0,10233 | -0,67 | -1,59 | 0,00036 | ---                    | GPR116             |
| 8126798 | -0,49 | -1,40 | 0,25428 | -1,09 | -2,13 | 0,01038 | NM_015234              | DOLPP1             |
| 8158513 | -0,49 | -1,40 | 0,20283 | 1,53  | 2,88  | 0,01962 | NM_020438              | MIR148B            |
| 7955906 | -0,49 | -1,40 | 0,05744 | -1,09 | -2,13 | 0,03583 | NR_029894              | AKAP5              |
| 7975066 | -0,49 | -1,40 | 0,08199 | -0,28 | -1,21 | 0,52550 | NM_004857              | SH2D1A             |
| 8169792 | -0,49 | -1,40 | 0,12569 | -0,57 | -1,48 | 0,04481 | NM_002351              | P2RY6              |
| 7942409 | -0,49 | -1,40 | 0,22137 | -0,06 | -1,04 | 0,79061 | NM_176796              | SNORD116-29        |
| 7982006 | -0,49 | -1,40 | 0,04857 | -1,42 | -2,67 | 0,00492 | NR_003360              | PRPS1L1 // PRPS1L1 |
| 8138435 | -0,49 | -1,40 | 0,01221 | -0,83 | -1,78 | 0,00158 | NM_175886 // NM_175886 | NUDT16             |
| 8082667 | -0,49 | -1,40 | 0,28612 | -0,85 | -1,80 | 0,14628 | NR_033268              | MGC2752            |
| 8031973 | -0,49 | -1,40 | 0,26610 | -0,56 | -1,48 | 0,28595 | NR_026052              | PKD1L3             |
| 8002629 | -0,49 | -1,40 | 0,08537 | -0,81 | -1,75 | 0,01410 | NM_181536              | GPR114             |
| 7996064 | -0,49 | -1,40 | 0,37415 | -0,86 | -1,82 | 0,01203 | NM_153837              | C16orf73           |
| 7998615 | -0,49 | -1,40 | 0,03180 | -1,09 | -2,13 | 0,04211 | NM_001163560           | ---                |
| 8053360 | -0,49 | -1,40 | 0,43722 | -1,84 | -3,58 | 0,00143 | ---                    | SSX9               |
| 8172399 | -0,49 | -1,40 | 0,40181 | -0,18 | -1,14 | 0,22692 | ENST00000376909        | ---                |
| 8001348 | -0,49 | -1,40 | 0,27317 | -0,62 | -1,54 | 0,00300 | ---                    | KRT83              |
| 7963359 | -0,49 | -1,40 | 0,39951 | -0,45 | -1,37 | 0,15359 | NM_002282              | SNORD60            |
| 7998722 | -0,49 | -1,40 | 0,35910 | -0,28 | -1,21 | 0,03836 | NR_002736              | TSGA10             |
| 8054166 | -0,49 | -1,40 | 0,20750 | -0,32 | -1,25 | 0,13619 | NM_025244              | ---                |
| 8083322 | -0,49 | -1,40 | 0,06726 | -1,18 | -2,26 | 0,05715 | ---                    | ---                |
| 8061881 | -0,49 | -1,40 | 0,44347 | -1,40 | -2,63 | 0,00225 | ---                    | ---                |
| 8100143 | -0,49 | -1,40 | 0,06749 | -0,88 | -1,84 | 0,00454 | ---                    | C16orf85           |
| 8003318 | -0,49 | -1,40 | 0,17197 | -0,37 | -1,30 | 0,09181 | AK127438               | MUL1               |
| 7913242 | -0,49 | -1,40 | 0,30407 | 0,15  | 1,11  | 0,69262 | NM_024544              | ---                |
| 7901314 | -0,49 | -1,40 | 0,40443 | -1,34 | -2,53 | 0,00814 | ---                    | ---                |



|         |       |       |         |       |       |         |                   |              |  |
|---------|-------|-------|---------|-------|-------|---------|-------------------|--------------|--|
| 7927708 | -0,49 | -1,40 | 0,38038 | -0,72 | -1,65 | 0,01133 | ---               | C6orf134     |  |
| 8177834 | -0,49 | -1,40 | 0,12199 | 1,24  | 2,37  | 0,00184 | NM_024909         | SNORD14E     |  |
| 7952335 | -0,49 | -1,40 | 0,29959 | -1,14 | -2,20 | 0,04958 | NR_003125         | ---          |  |
| 7922472 | -0,49 | -1,40 | 0,15933 | -0,85 | -1,80 | 0,05768 | ---               | TRIM26       |  |
| 8124726 | -0,49 | -1,40 | 0,01143 | 0,71  | 1,64  | 0,11456 | NM_003449         | PCDH9        |  |
| 7971922 | -0,49 | -1,40 | 0,33631 | -0,81 | -1,75 | 0,01157 | NM_203487         | ARHGAP22     |  |
| 7933469 | -0,49 | -1,40 | 0,32410 | -0,50 | -1,42 | 0,09117 | NM_021226         | ABCG4        |  |
| 7944447 | -0,49 | -1,40 | 0,24127 | 0,63  | 1,54  | 0,19937 | NM_022169         | CRX          |  |
| 8029978 | -0,49 | -1,40 | 0,08626 | -1,48 | -2,79 | 0,00056 | NM_000554         | ABCB10       |  |
| 7924956 | -0,49 | -1,40 | 0,04788 | 0,67  | 1,59  | 0,12714 | NM_012089         | HPGDS        |  |
| 8101780 | -0,49 | -1,40 | 0,08773 | -0,81 | -1,75 | 0,04314 | NM_014485         | SLC14A2      |  |
| 8021058 | -0,49 | -1,40 | 0,32696 | -1,17 | -2,26 | 0,00032 | NM_007163         | ---          |  |
| 8093126 | -0,49 | -1,40 | 0,10144 | -0,75 | -1,68 | 0,15385 | ---               | ZNF418       |  |
| 8039698 | -0,49 | -1,40 | 0,18498 | -0,45 | -1,37 | 0,00368 | NM_133460         | EXD1         |  |
| 7987623 | -0,49 | -1,40 | 0,05418 | -0,31 | -1,24 | 0,30157 | NM_152596         | ---          |  |
| 8046626 | -0,49 | -1,41 | 0,05873 | -1,30 | -2,46 | 0,03067 | ---               | USP6         |  |
| 8004086 | -0,49 | -1,41 | 0,19542 | -0,68 | -1,60 | 0,00600 | NM_004505         | ---          |  |
| 7910377 | -0,49 | -1,41 | 0,54013 | -1,08 | -2,11 | 0,24693 | ---               | ---          |  |
| 8092226 | -0,49 | -1,41 | 0,25500 | -0,27 | -1,29 | 0,01791 | ---               | ---          |  |
| 8128936 | -0,49 | -1,41 | 0,08405 | -0,74 | -1,67 | 0,00021 | ---               | TAP2         |  |
| 8178841 | -0,49 | -1,41 | 0,00632 | 0,97  | 1,96  | 0,05401 | NM_018833         | LOC100132354 |  |
| 8119915 | -0,49 | -1,41 | 0,28847 | -0,06 | -1,04 | 0,52744 | NR_024478         | SNORD115-44  |  |
| 7982094 | -0,49 | -1,41 | 0,24781 | -1,62 | -3,07 | 0,04717 | NR_003359         | ---          |  |
| 7937711 | -0,49 | -1,41 | 0,53184 | -0,69 | -1,62 | 0,03450 | ---               | ZNF599       |  |
| 8036038 | -0,49 | -1,41 | 0,07850 | 0,05  | 1,04  | 0,84626 | NM_001007248      | ---          |  |
| 8023640 | -0,49 | -1,41 | 0,04894 | -1,06 | -2,09 | 0,00145 | ---               | MCRS1        |  |
| 7963064 | -0,49 | -1,41 | 0,20109 | 1,14  | 2,20  | 0,13185 | NM_006337         | HFM1         |  |
| 7917634 | -0,49 | -1,41 | 0,08523 | -0,73 | -1,66 | 0,00076 | NM_001017975      | KBTBD12      |  |
| 8082400 | -0,49 | -1,41 | 0,38544 | -0,86 | -1,82 | 0,20501 | NM_207335         | GPR45        |  |
| 8044124 | -0,49 | -1,41 | 0,37193 | -1,24 | -2,36 | 0,00804 | NM_007227         | ACTL6B       |  |
| 8141580 | -0,49 | -1,41 | 0,21608 | -1,79 | -3,47 | 0,00970 | NM_016188         | ---          |  |
| 8067860 | -0,49 | -1,41 | 0,34415 | 0,31  | 1,24  | 0,46053 | ---               | FAM149A      |  |
| 8098620 | -0,49 | -1,41 | 0,06561 | -0,43 | -1,35 | 0,02837 | NM_015398         | CRYGS        |  |
| 8092621 | -0,49 | -1,41 | 0,32047 | -0,43 | -1,34 | 0,00291 | NM_017541         | CA6          |  |
| 7897426 | -0,49 | -1,41 | 0,13413 | -0,45 | -1,37 | 0,04320 | NM_001215         | KAZ          |  |
| 7898102 | -0,49 | -1,41 | 0,44955 | -0,76 | -1,69 | 0,00492 | NM_201628         | NCLN         |  |
| 8024584 | -0,49 | -1,41 | 0,28052 | 2,51  | 5,68  | 0,01765 | NM_020170         | CUL7         |  |
| 8126486 | -0,49 | -1,41 | 0,17985 | 0,56  | 1,47  | 0,16861 | NM_014780         | DOK1         |  |
| 8042917 | -0,49 | -1,41 | 0,15486 | -0,03 | -1,02 | 0,75402 | NM_001381         | SMOX         |  |
| 8060745 | -0,49 | -1,41 | 0,21971 | 2,47  | 5,53  | 0,00134 | NM_175839         | PKDREJ       |  |
| 8076754 | -0,49 | -1,41 | 0,17099 | -0,77 | -1,71 | 0,00034 | NM_006071         | SLC25A37     |  |
| 8145281 | -0,49 | -1,41 | 0,17675 | 3,27  | 9,64  | 0,00191 | NM_016612         | TBX2         |  |
| 8008969 | -0,49 | -1,41 | 0,12760 | -1,38 | -2,61 | 0,02676 | NM_005994         | CA9          |  |
| 8155083 | -0,49 | -1,41 | 0,13137 | -1,09 | -2,12 | 0,08419 | NM_001216         | OR10H3       |  |
| 8026486 | -0,49 | -1,41 | 0,28319 | -1,40 | -2,64 | 0,01061 | NM_013938         | SARM1        |  |
| 8005865 | -0,49 | -1,41 | 0,02219 | -0,02 | -1,01 | 0,94499 | NM_015077         | KIAA1920     |  |
| 7985416 | -0,49 | -1,41 | 0,33494 | 0,09  | 1,07  | 0,82323 | AB067507 KIAA1920 |              |  |
| 7985457 | -0,49 | -1,41 | 0,33494 | 0,09  | 1,07  | 0,82323 | AB067507 KIAA1920 |              |  |
| 7985688 | -0,49 | -1,41 | 0,33494 | 0,09  | 1,07  | 0,82323 | AB067507          | KIAA1920     |  |
| 7990941 | -0,49 | -1,41 | 0,33494 | 0,09  | 1,07  | 0,82323 | AB067507 SLC17A6  |              |  |
| 7938975 | -0,49 | -1,41 | 0,13512 | -0,78 | -1,72 | 0,00028 | NM_020346         | CA5A         |  |
| 8003313 | -0,49 | -1,41 | 0,25611 | -1,19 | -2,28 | 0,21300 | NM_001739         | SFRS13B      |  |
| 8128079 | -0,49 | -1,41 | 0,15587 | 0,69  | 1,62  | 0,01892 | NM_080743         | TGFB1I1      |  |
| 7995206 | -0,49 | -1,41 | 0,37037 | -1,11 | -2,16 | 0,05489 | NM_001042454      | ARID5A       |  |
| 8043621 | -0,49 | -1,41 | 0,15689 | 0,06  | 1,04  | 0,79292 | NM_212481         | TMEM8B       |  |
| 8155148 | -0,49 | -1,41 | 0,27632 | -0,48 | -1,40 | 0,42694 | NM_016446         | GUCY2F       |  |
| 8174448 | -0,49 | -1,41 | 0,04240 | -1,77 | -3,40 | 0,00189 | NM_001522         | RNU2-1       |  |
| 7948894 | -0,49 | -1,41 | 0,49548 | -0,77 | -1,71 | 0,36093 | NR_002716         | SEC16B       |  |
| 7922550 | -0,49 | -1,41 | 0,09961 | -0,73 | -1,65 | 0,05457 | NM_033127         | ZBTB3        |  |
| 7948829 | -0,49 | -1,41 | 0,20683 | 0,01  | 1,01  | 0,94115 | NM_024784         | ---          |  |
| 8094357 | -0,49 | -1,41 | 0,08636 | -0,43 | -1,34 | 0,00154 | ---               | CD86         |  |
| 8082035 | -0,49 | -1,41 | 0,04604 | -1,06 | -2,09 | 0,00784 | NM_175862         | C18orf62     |  |
| 8023876 | -0,49 | -1,41 | 0,38080 | -0,67 | -1,59 | 0,00511 | NM_001037331      | ST6GALNAC3   |  |
| 7902425 | -0,49 | -1,41 | 0,17973 | -0,66 | -1,58 | 0,09395 | NM_152996         | UNC5CL       |  |
| 8126248 | -0,49 | -1,41 | 0,04432 | -0,02 | -1,01 | 0,90302 | NM_173561         | ---          |  |
| 8044107 | -0,49 | -1,41 | 0,26484 | -1,05 | -2,08 | 0,01501 | ---               | RG520        |  |
| 8146435 | -0,49 | -1,41 | 0,16950 | -0,24 | -1,18 | 0,35748 | NM_170587         | CNIH3        |  |
| 7910022 | -0,49 | -1,41 | 0,04918 | -0,55 | -1,46 | 0,10988 | NM_152495         | MARCKS       |  |
| 8121563 | -0,50 | -1,41 | 0,05214 | -1,63 | -3,10 | 0,00060 | NM_002356         | IL31         |  |
| 7967226 | -0,50 | -1,41 | 0,16407 | -1,37 | -2,58 | 0,01841 | NM_001014336      | ---          |  |
| 8019960 | -0,50 | -1,41 | 0,04099 | -1,28 | -2,44 | 0,00349 | ---               | ZSWIM2       |  |
| 8057563 | -0,50 | -1,41 | 0,00959 | -0,88 | -1,84 | 0,00084 | NM_182521         | ZIC1         |  |
| 8083233 | -0,50 | -1,41 | 0,04432 | 3,17  | 9,00  | 0,00144 | NM_003412         | ---          |  |

|         |       |       |         |       |       |         |                 |             |  |
|---------|-------|-------|---------|-------|-------|---------|-----------------|-------------|--|
| 8045931 | -0,50 | -1,41 | 0,14088 | 0,01  | 1,01  | 0,92822 | ---             | ---         |  |
| 8138948 | -0,50 | -1,41 | 0,37764 | -0,99 | -1,98 | 0,00000 | ---             | ---         |  |
| 8083848 | -0,50 | -1,41 | 0,12868 | -0,56 | -1,47 | 0,01909 | ---             | ---         |  |
| 8022623 | -0,50 | -1,41 | 0,52927 | -0,75 | -1,69 | 0,11310 | ---             | ---         |  |
| 8065196 | -0,50 | -1,41 | 0,08572 | -0,80 | -1,74 | 0,19880 | ---             | C10orf62    |  |
| 7929674 | -0,50 | -1,41 | 0,07397 | -0,59 | -1,50 | 0,05356 | NM_001009997    | LOC285033   |  |
| 8043583 | -0,50 | -1,41 | 0,13376 | -1,08 | -2,11 | 0,09071 | AK057419 ZNF643 |             |  |
| 7900438 | -0,50 | -1,41 | 0,26467 | 0,44  | 1,35  | 0,38428 | NM_023070       | ---         |  |
| 8052231 | -0,50 | -1,41 | 0,36391 | -0,79 | -1,73 | 0,00329 | ---             | FZD1        |  |
| 8134117 | -0,50 | -1,41 | 0,45528 | -0,95 | -1,93 | 0,01988 | NM_003505       | NLRP5       |  |
| 8031600 | -0,50 | -1,41 | 0,27183 | -1,05 | -2,07 | 0,03410 | NM_153447       | SNORA69     |  |
| 8174715 | -0,50 | -1,41 | 0,02068 | -0,73 | -1,66 | 0,08666 | NR_002584       | SLC17A2     |  |
| 8124365 | -0,50 | -1,41 | 0,26384 | -0,76 | -1,69 | 0,00035 | NM_005835       | ME3         |  |
| 7950864 | -0,50 | -1,41 | 0,10443 | 1,40  | 2,65  | 0,01443 | NM_001014811    | SLC44A4     |  |
| 8125149 | -0,50 | -1,41 | 0,35093 | -1,38 | -2,61 | 0,00395 | NM_025257       | SLC44A4     |  |
| 8178653 | -0,50 | -1,41 | 0,35093 | -1,38 | -2,61 | 0,00395 | NM_025257       | SLC44A4     |  |
| 8179861 | -0,50 | -1,41 | 0,35093 | -1,38 | -2,61 | 0,00395 | NM_025257       | ---         |  |
| 7913801 | -0,50 | -1,41 | 0,34595 | -0,54 | -1,45 | 0,00969 | ---             | CD5L        |  |
| 7921332 | -0,50 | -1,41 | 0,25886 | -2,10 | -4,29 | 0,00123 | NM_005894       | PARD6B      |  |
| 8063410 | -0,50 | -1,41 | 0,14301 | 2,64  | 6,25  | 0,02493 | NM_032521       | LONP1       |  |
| 8033002 | -0,50 | -1,41 | 0,07579 | 1,08  | 2,11  | 0,03615 | NM_004793       | TRIM29      |  |
| 7952290 | -0,50 | -1,41 | 0,01298 | -0,68 | -1,61 | 0,00864 | NM_012101       | METTL11A    |  |
| 8158544 | -0,50 | -1,41 | 0,14928 | 0,38  | 1,30  | 0,12055 | NM_014064       | SNORD115-26 |  |
| 7982058 | -0,50 | -1,41 | 0,62840 | -2,27 | -4,83 | 0,00013 | NR_003343       | ---         |  |
| 8088891 | -0,50 | -1,41 | 0,35874 | -1,71 | -3,28 | 0,01156 | ---             | PEX11A      |  |
| 7991323 | -0,50 | -1,41 | 0,18616 | -0,32 | -1,25 | 0,38224 | NM_003847       | ---         |  |
| 8021714 | -0,50 | -1,41 | 0,18370 | -0,56 | -1,47 | 0,14986 | ---             | ---         |  |
| 8146458 | -0,50 | -1,41 | 0,18780 | -0,35 | -1,27 | 0,02324 | ---             | MED25       |  |
| 8030498 | -0,50 | -1,41 | 0,15663 | -0,49 | -1,40 | 0,14413 | NM_030973       | ALB         |  |
| 8095628 | -0,50 | -1,41 | 0,08591 | -0,34 | -1,27 | 0,01229 | NM_000477       | ---         |  |
| 7979999 | -0,50 | -1,41 | 0,25964 | -0,44 | -1,35 | 0,16570 | ---             | FN3K        |  |
| 8010841 | -0,50 | -1,41 | 0,13298 | 0,69  | 1,61  | 0,25420 | NM_022158       | MRGPRX1     |  |
| 7947093 | -0,50 | -1,41 | 0,24606 | -1,24 | -2,37 | 0,00161 | NM_147199       | ---         |  |
| 8084171 | -0,50 | -1,41 | 0,00242 | -1,31 | -2,49 | 0,17548 | ---             | ---         |  |
| 7901374 | -0,50 | -1,41 | 0,12164 | -0,95 | -1,93 | 0,00012 | ---             | ---         |  |
| 8068018 | -0,50 | -1,41 | 0,25757 | -1,12 | -2,17 | 0,00458 | ---             | PIP5K1B     |  |
| 8155673 | -0,50 | -1,41 | 0,06991 | -0,77 | -1,70 | 0,00212 | NM_003558       | ZNF687      |  |
| 7905382 | -0,50 | -1,41 | 0,18073 | 0,99  | 1,98  | 0,16088 | NM_020832       | MYO5C       |  |
| 7988876 | -0,50 | -1,41 | 0,19757 | 3,06  | 8,31  | 0,00016 | NM_018728       | OR4S1       |  |
| 7939871 | -0,50 | -1,41 | 0,29802 | -1,15 | -2,22 | 0,00815 | NM_001004725    | MYO19       |  |
| 8014454 | -0,50 | -1,41 | 0,08666 | 3,07  | 8,38  | 0,00036 | NM_001163735    | THAP3       |  |
| 7897329 | -0,50 | -1,41 | 0,47321 | -0,14 | -1,10 | 0,74872 | NM_138350       | AMELX       |  |
| 8166006 | -0,50 | -1,41 | 0,28160 | -1,43 | -2,69 | 0,00120 | NM_182680       | SLC1A3      |  |
| 8104930 | -0,50 | -1,41 | 0,25830 | -1,15 | -2,22 | 0,00059 | NM_004172       | IL17RC      |  |
| 8077688 | -0,50 | -1,41 | 0,36624 | -0,10 | -1,07 | 0,77782 | NM_153461       | INPP5E      |  |
| 8165171 | -0,50 | -1,41 | 0,04756 | 0,68  | 1,60  | 0,45730 | NM_019892       | M CART2     |  |
| 8022763 | -0,50 | -1,41 | 0,01449 | -0,31 | -1,24 | 0,31498 | NM_001034172    | ---         |  |
| 7981324 | -0,50 | -1,41 | 0,02041 | -1,30 | -2,46 | 0,03430 | ---             | ZNRD1       |  |
| 8117822 | -0,50 | -1,41 | 0,15175 | 1,14  | 2,21  | 0,02468 | NM_170783       | LYSMD4      |  |
| 7991503 | -0,50 | -1,41 | 0,07483 | 0,22  | 1,16  | 0,41513 | NM_152449       | TNNI3K      |  |
| 7902317 | -0,50 | -1,41 | 0,04893 | -0,90 | -1,86 | 0,00095 | NM_015978       | CTAGEP      |  |
| 7931389 | -0,50 | -1,41 | 0,11365 | -1,04 | -2,05 | 0,00095 | BC036527        | ---         |  |
| 8137900 | -0,50 | -1,41 | 0,57774 | -2,19 | -4,57 | 0,03490 | ---             | ---         |  |
| 8137903 | -0,50 | -1,41 | 0,57774 | -2,19 | -4,57 | 0,03490 | ---             | SNORD54     |  |
| 8150877 | -0,50 | -1,41 | 0,14483 | -0,87 | -1,83 | 0,01121 | NR_002437       | TOR2A       |  |
| 8164243 | -0,50 | -1,41 | 0,24892 | 1,13  | 2,19  | 0,25204 | NM_130459       | LCE3A       |  |
| 7920191 | -0,50 | -1,41 | 0,50039 | -0,29 | -1,22 | 0,67663 | NM_178431       | GPHA2       |  |
| 7949320 | -0,50 | -1,41 | 0,17930 | -0,04 | -1,03 | 0,91978 | NM_130769       | ---         |  |
| 8034326 | -0,50 | -1,41 | 0,30014 | -0,97 | -1,96 | 0,01344 | ---             | SH2D5       |  |
| 7913290 | -0,50 | -1,41 | 0,08052 | 0,30  | 1,23  | 0,30598 | NM_001103161    | FBXW10      |  |
| 8005483 | -0,50 | -1,42 | 0,32491 | -1,07 | -2,10 | 0,00289 | NM_031456       | TROAP       |  |
| 7955195 | -0,50 | -1,42 | 0,16676 | 1,07  | 2,09  | 0,02028 | NM_005480       | PARD6A      |  |
| 7996647 | -0,50 | -1,42 | 0,33330 | 0,97  | 1,96  | 0,02532 | NM_016948       | NLRC4       |  |
| 8051396 | -0,50 | -1,42 | 0,08093 | -0,61 | -1,53 | 0,03299 | NM_021209       | DEFB123     |  |
| 8061519 | -0,50 | -1,42 | 0,05759 | -1,11 | -2,16 | 0,09459 | NM_153324       | MIR181A1    |  |
| 7923175 | -0,50 | -1,42 | 0,23537 | -0,52 | -1,43 | 0,10517 | NR_029626       | VSIG10L     |  |
| 8038785 | -0,50 | -1,42 | 0,36652 | 0,02  | 1,01  | 0,94887 | NM_001163922    | CRHR2       |  |
| 8138865 | -0,50 | -1,42 | 0,19482 | -1,03 | -2,05 | 0,02546 | NM_001883       | ---         |  |
| 8005223 | -0,50 | -1,42 | 0,11767 | -1,07 | -2,10 | 0,00718 | ---             | BAX         |  |
| 8030158 | -0,50 | -1,42 | 0,13737 | -0,74 | -1,67 | 0,06347 | NR_027882       | RNFT2       |  |
| 7959025 | -0,50 | -1,42 | 0,18982 | 1,31  | 2,49  | 0,02427 | NM_001109903    | C20orf108   |  |
| 8063478 | -0,50 | -1,42 | 0,11342 | -0,70 | -1,62 | 0,10536 | NM_080821       | C15orf33    |  |
| 7988625 | -0,50 | -1,42 | 0,27466 | -0,31 | -1,24 | 0,36545 | NM_152647       | UGT2A3      |  |

|         |       |       |         |       |       |         |                 |           |
|---------|-------|-------|---------|-------|-------|---------|-----------------|-----------|
| 8100760 | -0,50 | -1,42 | 0,02961 | -1,10 | -2,14 | 0,11725 | NM_024743       | ---       |
| 8057439 | -0,50 | -1,42 | 0,48161 | -1,18 | -2,27 | 0,01070 | ---             | PDE1B     |
| 7955943 | -0,50 | -1,42 | 0,09420 | -0,97 | -1,96 | 0,00317 | NM_000924       | ---       |
| 8050656 | -0,50 | -1,42 | 0,04326 | -0,89 | -1,86 | 0,01569 | ---             | ACOXL     |
| 8044353 | -0,50 | -1,42 | 0,39124 | -0,02 | -1,01 | 0,92197 | NM_001142807    | MIR302A   |
| 8102404 | -0,50 | -1,42 | 0,12393 | -0,94 | -1,91 | 0,04076 | NR_029835       | TRPV5     |
| 8143518 | -0,50 | -1,42 | 0,46044 | -0,96 | -1,95 | 0,00233 | NM_019841       | HCRP1     |
| 8119525 | -0,50 | -1,42 | 0,16804 | -1,22 | -2,33 | 0,15158 | AY465895 TH     |           |
| 7945712 | -0,50 | -1,42 | 0,08299 | -0,81 | -1,76 | 0,00164 | NM_199292       | CES8      |
| 7996377 | -0,50 | -1,42 | 0,02206 | 1,21  | 2,32  | 0,04367 | NM_173815       | HSD17B8   |
| 8118622 | -0,50 | -1,42 | 0,06834 | -1,40 | -2,63 | 0,00106 | NM_014234       | HSD17B8   |
| 8178234 | -0,50 | -1,42 | 0,06834 | -1,40 | -2,63 | 0,00106 | NM_014234       | HSD17B8   |
| 8179534 | -0,50 | -1,42 | 0,06834 | -1,40 | -2,63 | 0,00106 | NM_014234       | PPCDC     |
| 7984943 | -0,50 | -1,42 | 0,29002 | -0,36 | -1,29 | 0,05988 | NM_021823       | DDX55     |
| 7959604 | -0,50 | -1,42 | 0,41118 | 1,72  | 3,30  | 0,00040 | NM_020936       | ATP6V0A4  |
| 8143221 | -0,50 | -1,42 | 0,12984 | -0,80 | -1,74 | 0,02952 | NM_020632       | PDE4A     |
| 8025633 | -0,50 | -1,42 | 0,17687 | 0,45  | 1,37  | 0,11879 | NM_001111307    | EDEM1     |
| 8085116 | -0,50 | -1,42 | 0,07957 | -1,43 | -2,69 | 0,05853 | NM_014674       | MIR23B    |
| 8156569 | -0,50 | -1,42 | 0,41609 | -1,08 | -2,12 | 0,01817 | NR_029664       | ---       |
| 8100003 | -0,50 | -1,42 | 0,14907 | -0,55 | -1,46 | 0,00388 | ---             | ---       |
| 7986346 | -0,50 | -1,42 | 0,06597 | -1,26 | -2,40 | 0,02904 | ---             | ZCCHC24   |
| 7934690 | -0,50 | -1,42 | 0,31078 | -0,43 | -1,35 | 0,59132 | NM_153367       | ---       |
| 7967709 | -0,50 | -1,42 | 0,36581 | -0,17 | -1,12 | 0,28743 | ---             | ASB12     |
| 8173238 | -0,50 | -1,42 | 0,38563 | 1,96  | 3,90  | 0,00390 | NM_130388       | ---       |
| 7900212 | -0,50 | -1,42 | 0,06140 | -1,23 | -2,34 | 0,03252 | ---             | APOBEC3H  |
| 8073096 | -0,50 | -1,42 | 0,35011 | -0,55 | -1,47 | 0,01538 | NM_001166003    | WWC3      |
| 8165947 | -0,50 | -1,42 | 0,09820 | 0,26  | 1,20  | 0,51495 | NM_015691       | DNAH10    |
| 7959681 | -0,50 | -1,42 | 0,08992 | -0,38 | -1,30 | 0,11008 | NM_207437       | LOC349196 |
| 8149151 | -0,50 | -1,42 | 0,69309 | -0,98 | -1,97 | 0,15488 | NR_027000       | LOC349196 |
| 8149214 | -0,50 | -1,42 | 0,69309 | -0,98 | -1,97 | 0,15488 | NR_027000       | ---       |
| 8051319 | -0,50 | -1,42 | 0,20334 | -0,46 | -1,37 | 0,11587 | ---             | PDCL2     |
| 8100458 | -0,50 | -1,42 | 0,19427 | -1,03 | -2,04 | 0,00101 | NM_152401       | TSHB      |
| 7904203 | -0,50 | -1,42 | 0,18265 | -1,06 | -2,08 | 0,00107 | NM_000549       | HBE1      |
| 7946061 | -0,50 | -1,42 | 0,35020 | -1,07 | -2,11 | 0,07108 | NM_005330       | ---       |
| 7983773 | -0,50 | -1,42 | 0,12892 | -0,19 | -1,14 | 0,53532 | ---             | SMOC2     |
| 8123446 | -0,50 | -1,42 | 0,14640 | -1,08 | -2,12 | 0,00418 | NM_022138       | TMEM84    |
| 7984511 | -0,50 | -1,42 | 0,17309 | -1,12 | -2,17 | 0,01678 | NR_026949       | NMU       |
| 8100464 | -0,50 | -1,42 | 0,03302 | 0,47  | 1,39  | 0,45977 | NM_006681       | CCDC75    |
| 8041487 | -0,50 | -1,42 | 0,05269 | -0,62 | -1,53 | 0,04986 | NM_174931       | MEGF11    |
| 7989887 | -0,50 | -1,42 | 0,10866 | -0,77 | -1,70 | 0,08521 | NM_032445       | CXorf56   |
| 8174677 | -0,50 | -1,42 | 0,26419 | -0,52 | -1,43 | 0,52090 | NM_022101       | TP63      |
| 8084766 | -0,50 | -1,42 | 0,00691 | -1,27 | -2,42 | 0,09985 | NM_003722       | MPEG1     |
| 7948364 | -0,50 | -1,42 | 0,13895 | -1,47 | -2,76 | 0,00066 | NM_001039396    | PRR3      |
| 8117922 | -0,50 | -1,42 | 0,13269 | 0,59  | 1,51  | 0,08699 | NM_025263       | ---       |
| 8092748 | -0,50 | -1,42 | 0,20510 | -1,03 | -2,04 | 0,01018 | ---             | ---       |
| 8020825 | -0,50 | -1,42 | 0,16349 | -1,30 | -2,46 | 0,00574 | ---             | ---       |
| 8059339 | -0,50 | -1,42 | 0,08722 | -1,34 | -2,52 | 0,00024 | ---             | ANKRD32   |
| 8113124 | -0,50 | -1,42 | 0,06876 | -0,20 | -1,15 | 0,37812 | NM_032290       | EDDM3B    |
| 7973098 | -0,50 | -1,42 | 0,20010 | -0,85 | -1,80 | 0,00607 | NM_022360       | KCTD4     |
| 7971369 | -0,50 | -1,42 | 0,06922 | -0,80 | -1,74 | 0,00463 | NM_198404       | TRPM4     |
| 8030251 | -0,50 | -1,42 | 0,29767 | -0,74 | -1,67 | 0,02535 | NM_017636       | C2orf16   |
| 8040980 | -0,50 | -1,42 | 0,07815 | -1,19 | -2,28 | 0,01494 | NM_032266       | ---       |
| 8175232 | -0,50 | -1,42 | 0,42877 | -1,02 | -2,03 | 0,04425 | ---             | NPBWR2    |
| 8067818 | -0,50 | -1,42 | 0,24635 | -1,89 | -3,71 | 0,00232 | NM_005286       | ---       |
| 8101697 | -0,50 | -1,42 | 0,11950 | -1,05 | -2,08 | 0,00591 | ---             | ARL6      |
| 8081158 | -0,50 | -1,42 | 0,05675 | -0,48 | -1,39 | 0,23408 | NM_032146       | C12orf48  |
| 7958031 | -0,51 | -1,42 | 0,13785 | 1,20  | 2,30  | 0,02483 | AK302724 SGSM3  |           |
| 8073259 | -0,51 | -1,42 | 0,05823 | -0,21 | -1,16 | 0,42905 | NM_015705       | ZNF23     |
| 8002533 | -0,51 | -1,42 | 0,26557 | -0,79 | -1,73 | 0,00355 | NM_145911       | C21orf122 |
| 8070867 | -0,51 | -1,42 | 0,44854 | -1,19 | -2,28 | 0,04618 | ENST00000416043 | C9orf144B |
| 8160898 | -0,51 | -1,42 | 0,13958 | -0,52 | -1,43 | 0,00405 | NM_001141917    | FNDC4     |
| 8051187 | -0,51 | -1,42 | 0,24578 | -0,63 | -1,54 | 0,15280 | NM_022823       | KRT5      |
| 7963427 | -0,51 | -1,42 | 0,26434 | -1,09 | -2,13 | 0,06120 | NM_000424       | FREM2     |
| 7968678 | -0,51 | -1,42 | 0,11354 | 1,01  | 2,01  | 0,01497 | NM_207361       | PPP1R2P3  |
| 8109505 | -0,51 | -1,42 | 0,24953 | -0,37 | -1,29 | 0,10714 | NR_002168       | ---       |
| 8035865 | -0,51 | -1,42 | 0,54585 | -2,06 | -4,17 | 0,02227 | ---             | MRPL34    |
| 8026724 | -0,51 | -1,42 | 0,25621 | 1,38  | 2,61  | 0,00533 | NM_023937       | PCDH7     |
| 8094520 | -0,51 | -1,42 | 0,01817 | -1,13 | -2,18 | 0,00204 | NM_032456       | TTL3      |
| 8077612 | -0,51 | -1,42 | 0,17279 | 0,46  | 1,38  | 0,00215 | NM_001025930    | COMMD4    |
| 7984989 | -0,51 | -1,42 | 0,07662 | 1,43  | 2,70  | 0,01378 | NM_017828       | FAM27A    |
| 8155521 | -0,51 | -1,42 | 0,72992 | -0,28 | -1,22 | 0,68598 | NR_024060       | FCGR1A    |
| 7905060 | -0,51 | -1,42 | 0,07869 | -1,54 | -2,91 | 0,00097 | NM_000566       | ---       |
| 7972225 | -0,51 | -1,42 | 0,04140 | -0,91 | -1,88 | 0,05340 | ---             | C17orf28  |

|         |       |       |         |       |       |         |              |          |
|---------|-------|-------|---------|-------|-------|---------|--------------|----------|
| 8018264 | -0,51 | -1,42 | 0,32929 | 1,67  | 3,17  | 0,00398 | NM_030630    | ZMAT1    |
| 8174119 | -0,51 | -1,42 | 0,18394 | -0,77 | -1,71 | 0,07920 | NM_032441    | TMEM149  |
| 8036136 | -0,51 | -1,42 | 0,31627 | 0,45  | 1,37  | 0,53056 | NM_024660    | CASZ1    |
| 7912343 | -0,51 | -1,42 | 0,54489 | -0,10 | -1,07 | 0,68936 | NM_001079843 | MAS1L    |
| 8124648 | -0,51 | -1,42 | 0,33595 | -1,35 | -2,55 | 0,00926 | NM_052967    | MAS1L    |
| 8178293 | -0,51 | -1,42 | 0,33595 | -1,35 | -2,55 | 0,00926 | NM_052967    | MAS1L    |
| 8179593 | -0,51 | -1,42 | 0,33595 | -1,35 | -2,55 | 0,00926 | NM_052967    | ELL3     |
| 7988212 | -0,51 | -1,42 | 0,02657 | 0,78  | 1,72  | 0,05327 | NM_025165    | RNASE12  |
| 7977606 | -0,51 | -1,42 | 0,33495 | -0,97 | -1,96 | 0,05156 | NM_001024822 | C5orf44  |
| 8105661 | -0,51 | -1,42 | 0,04999 | 0,07  | 1,05  | 0,78807 | NR_003545    | GJA10    |
| 8121132 | -0,51 | -1,42 | 0,20405 | -0,46 | -1,38 | 0,04923 | NM_032602    | MERTK    |
| 8044391 | -0,51 | -1,42 | 0,43177 | 2,15  | 4,44  | 0,01957 | NM_006343    | HEPACAM2 |
| 8140984 | -0,51 | -1,42 | 0,12732 | -0,69 | -1,62 | 0,06962 | NM_001039372 | SPANXN2  |
| 8175578 | -0,51 | -1,42 | 0,16632 | -0,48 | -1,39 | 0,16050 | NM_001009615 | ---      |
| 8151306 | -0,51 | -1,42 | 0,12125 | -0,99 | -1,98 | 0,00031 | ---          | TTC32    |
| 8050503 | -0,51 | -1,42 | 0,03100 | -0,67 | -1,59 | 0,03999 | NM_001008237 | SERINC2  |
| 7914350 | -0,51 | -1,42 | 0,22779 | -0,92 | -1,89 | 0,02811 | NM_178865    | ADAM21   |
| 7975406 | -0,51 | -1,42 | 0,12000 | -0,17 | -1,12 | 0,73311 | NM_003813    | RAB19    |
| 8136580 | -0,51 | -1,42 | 0,12655 | 0,07  | 1,05  | 0,60965 | NM_001008749 | TRIM65   |
| 8018502 | -0,51 | -1,42 | 0,24353 | -0,44 | -1,36 | 0,35458 | NM_173547    | DKKL1    |
| 8030292 | -0,51 | -1,42 | 0,23094 | -0,43 | -1,35 | 0,35888 | NM_014419    | ---      |
| 8043446 | -0,51 | -1,42 | 0,05003 | -1,06 | -2,08 | 0,00079 | ---          | PRODH    |
| 8074335 | -0,51 | -1,42 | 0,12908 | 0,25  | 1,19  | 0,52394 | NM_016335    | ---      |
| 8006679 | -0,51 | -1,42 | 0,50892 | -1,44 | -2,70 | 0,03173 | ---          | TSHZ2    |
| 8063437 | -0,51 | -1,42 | 0,05957 | -1,48 | -2,80 | 0,00345 | NM_173485    | SERINC4  |
| 7988227 | -0,51 | -1,42 | 0,21136 | -0,67 | -1,59 | 0,02740 | NM_001033517 | CBX2     |
| 8010320 | -0,51 | -1,42 | 0,25728 | -0,15 | -1,11 | 0,78539 | NM_005189    | ---      |
| 8008912 | -0,51 | -1,42 | 0,09225 | -0,57 | -1,49 | 0,07460 | ---          | HESX1    |
| 8088285 | -0,51 | -1,42 | 0,08232 | -0,63 | -1,55 | 0,13445 | NM_003865    | TMC6     |
| 8018823 | -0,51 | -1,42 | 0,20706 | 0,20  | 1,15  | 0,59129 | NM_001127198 | ---      |
| 8012906 | -0,51 | -1,42 | 0,24279 | -1,24 | -2,36 | 0,01158 | ---          | WDR49    |
| 8091922 | -0,51 | -1,42 | 0,17629 | -0,79 | -1,73 | 0,10702 | NM_178824    | ---      |
| 7932832 | -0,51 | -1,42 | 0,12683 | -0,81 | -1,75 | 0,06905 | ---          | SLC12A7  |
| 8110755 | -0,51 | -1,42 | 0,03365 | 2,46  | 5,49  | 0,00521 | NM_006598    | MUC13    |
| 8090180 | -0,51 | -1,42 | 0,15653 | -0,63 | -1,55 | 0,01353 | NM_033049    | C2orf80  |
| 8058542 | -0,51 | -1,42 | 0,11264 | -0,86 | -1,82 | 0,04419 | NM_001099334 | ---      |
| 8102305 | -0,51 | -1,42 | 0,18658 | -0,75 | -1,68 | 0,01261 | ---          | NXT1     |
| 8061368 | -0,51 | -1,42 | 0,33639 | -1,46 | -2,75 | 0,04714 | NM_013248    | CA2      |
| 8147132 | -0,51 | -1,42 | 0,11711 | 4,48  | 22,38 | 0,00000 | NM_000067    | ANTXRL   |
| 7927294 | -0,51 | -1,42 | 0,19222 | -0,54 | -1,45 | 0,00892 | NR_003601    | ---      |
| 8099027 | -0,51 | -1,42 | 0,02934 | -0,91 | -1,88 | 0,03087 | ---          | WDR8     |
| 7911839 | -0,51 | -1,42 | 0,14776 | 0,41  | 1,33  | 0,12357 | NM_017818    | MIR519A2 |
| 8031039 | -0,51 | -1,42 | 0,10978 | -1,23 | -2,34 | 0,03250 | NR_030222    | ---      |
| 8044105 | -0,51 | -1,42 | 0,03001 | -0,86 | -1,81 | 0,02329 | ---          | C7orf53  |
| 8135532 | -0,51 | -1,42 | 0,26081 | -0,77 | -1,71 | 0,01290 | NM_182597    | ---      |
| 8162584 | -0,51 | -1,42 | 0,15808 | -0,61 | -1,53 | 0,03907 | ---          | ---      |
| 7902909 | -0,51 | -1,42 | 0,26660 | -0,99 | -1,99 | 0,11574 | ---          | HOXA4    |
| 8138728 | -0,51 | -1,42 | 0,03397 | -0,47 | -1,38 | 0,05111 | NM_002141    | ---      |
| 8127995 | -0,51 | -1,42 | 0,10641 | -0,92 | -1,89 | 0,03640 | ---          | ---      |
| 7943956 | -0,51 | -1,42 | 0,05850 | -0,94 | -1,92 | 0,10369 | ---          | HEATR7B2 |
| 8111821 | -0,51 | -1,42 | 0,16365 | -0,81 | -1,76 | 0,00559 | NM_173489    | 01. Dez  |
| 8157477 | -0,51 | -1,42 | 0,12527 | -0,94 | -1,92 | 0,00840 | NM_017418    | ---      |
| 7955043 | -0,51 | -1,42 | 0,03370 | -0,58 | -1,49 | 0,02760 | ---          | SNX10    |
| 8131957 | -0,51 | -1,42 | 0,20271 | 2,19  | 4,56  | 0,00076 | NM_013322    | HAPLN3   |
| 7991224 | -0,51 | -1,42 | 0,26530 | -0,47 | -1,38 | 0,24936 | NM_178232    | ---      |
| 8143899 | -0,51 | -1,43 | 0,16511 | -1,40 | -2,64 | 0,05500 | ---          | ---      |
| 8163616 | -0,51 | -1,43 | 0,38833 | -0,79 | -1,73 | 0,03103 | ---          | IQCC     |
| 7899727 | -0,51 | -1,43 | 0,28038 | -0,19 | -1,14 | 0,45851 | NM_001160042 | PDZD2    |
| 8104693 | -0,51 | -1,43 | 0,26763 | -0,45 | -1,36 | 0,05458 | NM_178140    | STARD8   |
| 8168028 | -0,51 | -1,43 | 0,03814 | -0,49 | -1,40 | 0,46884 | NM_001142503 | ---      |
| 8023187 | -0,51 | -1,43 | 0,08359 | -0,70 | -1,63 | 0,00218 | ---          | ---      |
| 8078956 | -0,51 | -1,43 | 0,10064 | -0,87 | -1,83 | 0,00013 | ---          | C20orf79 |
| 8061224 | -0,51 | -1,43 | 0,34040 | -0,90 | -1,87 | 0,07240 | NM_178483    | PPM1F    |
| 8074806 | -0,51 | -1,43 | 0,33474 | -0,07 | -1,05 | 0,68336 | NM_014634    | NDUFS7   |
| 8024273 | -0,51 | -1,43 | 0,20851 | 0,38  | 1,30  | 0,53816 | NM_024407    | FBXO6    |
| 7897728 | -0,51 | -1,43 | 0,07813 | -0,39 | -1,31 | 0,13225 | NM_018438    | IL5      |
| 8114023 | -0,51 | -1,43 | 0,06601 | -0,90 | -1,87 | 0,01564 | NM_000879    | ---      |
| 8098498 | -0,51 | -1,43 | 0,17796 | -0,73 | -1,66 | 0,06075 | ---          | ---      |
| 8083492 | -0,51 | -1,43 | 0,12552 | -1,12 | -2,17 | 0,00112 | ---          | ---      |
| 8063449 | -0,51 | -1,43 | 0,33560 | -2,29 | -4,89 | 0,01160 | ---          | ---      |
| 7994093 | -0,51 | -1,43 | 0,25513 | -1,21 | -2,31 | 0,00085 | ---          | ---      |
| 8147501 | -0,51 | -1,43 | 0,07504 | -1,09 | -2,13 | 0,07203 | ---          | KRTAP6-3 |
| 8068145 | -0,51 | -1,43 | 0,35501 | -1,01 | -2,02 | 0,02792 | NM_181605    | OR4X1    |

|         |       |       |         |       |       |         |                 |              |
|---------|-------|-------|---------|-------|-------|---------|-----------------|--------------|
| 7939869 | -0,51 | -1,43 | 0,13655 | -1,14 | -2,21 | 0,01696 | NM_001004726    | ---          |
| 8113274 | -0,51 | -1,43 | 0,58060 | -1,28 | -2,42 | 0,10943 | ---             | NAGPA        |
| 7999279 | -0,51 | -1,43 | 0,15934 | 0,49  | 1,40  | 0,49006 | NM_016256       | FLJ25758     |
| 8033349 | -0,51 | -1,43 | 0,31565 | -1,48 | -2,79 | 0,06170 | NR_024372       | ---          |
| 8083538 | -0,51 | -1,43 | 0,26996 | -0,67 | -1,59 | 0,00924 | ---             | ---          |
| 7993846 | -0,51 | -1,43 | 0,32282 | -1,06 | -2,09 | 0,01540 | ---             | RANBP3L      |
| 8111569 | -0,51 | -1,43 | 0,28878 | -0,55 | -1,46 | 0,01033 | NM_001161429    | PDIK1L       |
| 7899087 | -0,51 | -1,43 | 0,09509 | 0,31  | 1,24  | 0,53222 | NR_026686       | TCEAL1       |
| 8169049 | -0,51 | -1,43 | 0,31140 | -0,93 | -1,90 | 0,00920 | NM_004780       | TMEM42       |
| 8079274 | -0,51 | -1,43 | 0,02724 | 0,06  | 1,04  | 0,80962 | NM_144638       | ZNF454       |
| 8110478 | -0,51 | -1,43 | 0,17937 | -1,53 | -2,89 | 0,05251 | NM_182594       | BRI3BP       |
| 7959777 | -0,51 | -1,43 | 0,02321 | 3,06  | 8,33  | 0,00503 | NM_080626       | ---          |
| 8176817 | -0,51 | -1,43 | 0,17399 | -0,93 | -1,91 | 0,00909 | ---             | ---          |
| 8176943 | -0,51 | -1,43 | 0,17399 | -0,93 | -1,91 | 0,00909 | ---             | ---          |
| 8177389 | -0,51 | -1,43 | 0,17399 | -0,93 | -1,91 | 0,00909 | ---             | ABCA10       |
| 8018006 | -0,51 | -1,43 | 0,07112 | -0,50 | -1,41 | 0,08526 | NM_080282       | TDGF3        |
| 8169385 | -0,51 | -1,43 | 0,40526 | -0,73 | -1,66 | 0,28503 | NR_002718       | LOC349196    |
| 8144410 | -0,51 | -1,43 | 0,68782 | -1,32 | -2,50 | 0,10562 | NR_027000       | ---          |
| 8112424 | -0,51 | -1,43 | 0,06997 | -1,05 | -2,07 | 0,00101 | ---             | FLJ40288     |
| 8136281 | -0,51 | -1,43 | 0,08810 | -1,12 | -2,17 | 0,03166 | ENST00000332558 | LOC100288871 |
| 8106929 | -0,51 | -1,43 | 0,15491 | -0,84 | -1,79 | 0,00379 | XR_078322       | GFRA2        |
| 8149629 | -0,51 | -1,43 | 0,41613 | 0,04  | 1,03  | 0,88570 | NM_001495       | ZNF557       |
| 8025132 | -0,51 | -1,43 | 0,07811 | 0,28  | 1,21  | 0,34044 | NM_024341       | C7orf10      |
| 8132439 | -0,51 | -1,43 | 0,14794 | -0,28 | -1,21 | 0,22292 | NM_024728       | ---          |
| 8062689 | -0,51 | -1,43 | 0,22171 | -0,87 | -1,82 | 0,00211 | ---             | SLC39A12     |
| 7926486 | -0,51 | -1,43 | 0,00902 | -0,42 | -1,34 | 0,01486 | NM_001145195    | LRRRC39      |
| 7917996 | -0,51 | -1,43 | 0,01638 | -0,36 | -1,28 | 0,19341 | NM_144620       | MYLK4        |
| 8123584 | -0,52 | -1,43 | 0,01632 | -0,29 | -1,22 | 0,05530 | NM_001012418    | NEK5         |
| 7971757 | -0,52 | -1,43 | 0,28261 | -0,79 | -1,73 | 0,00895 | NM_199289       | ---          |
| 8131412 | -0,52 | -1,43 | 0,32511 | -0,39 | -1,31 | 0,10604 | ---             | KIAA1244     |
| 8122279 | -0,52 | -1,43 | 0,00213 | 0,72  | 1,65  | 0,04828 | NM_020340       | OR7G3        |
| 8033738 | -0,52 | -1,43 | 0,05656 | -1,51 | -2,84 | 0,04868 | NM_001001958    | ZFYVE27      |
| 7929692 | -0,52 | -1,43 | 0,33300 | 0,86  | 1,81  | 0,04642 | NM_144588       | MIR100       |
| 7952315 | -0,52 | -1,43 | 0,03885 | -0,84 | -1,79 | 0,00467 | NR_029515       | BEST2        |
| 8026035 | -0,52 | -1,43 | 0,05083 | -0,46 | -1,37 | 0,10566 | NM_017682       | FUT9         |
| 8121152 | -0,52 | -1,43 | 0,12597 | -0,68 | -1,60 | 0,00585 | NM_006581       | TRIM6-TRIM34 |
| 7938012 | -0,52 | -1,43 | 0,21169 | 0,13  | 1,10  | 0,54192 | NM_001003819    | DKFz779M0652 |
| 7939587 | -0,52 | -1,43 | 0,37348 | -2,26 | -4,78 | 0,01971 | BX640618 PRRT3  | ---          |
| 8085255 | -0,52 | -1,43 | 0,08656 | -1,32 | -2,50 | 0,00003 | NM_207351       | C1orf168     |
| 7916506 | -0,52 | -1,43 | 0,14703 | -1,83 | -3,56 | 0,00068 | NM_001004303    | ZNF689       |
| 8000924 | -0,52 | -1,43 | 0,37982 | 0,22  | 1,16  | 0,67136 | NM_138447       | LOC643008    |
| 8009929 | -0,52 | -1,43 | 0,41966 | -0,09 | -1,06 | 0,87417 | NR_028439       | EHMT2        |
| 8125172 | -0,52 | -1,43 | 0,01795 | 0,34  | 1,26  | 0,54579 | NM_006709       | EHMT2        |
| 8179884 | -0,52 | -1,43 | 0,01795 | 0,34  | 1,26  | 0,54579 | NM_006709       | SLC47A2      |
| 8013364 | -0,52 | -1,43 | 0,01236 | -1,39 | -2,62 | 0,00019 | NM_152908       | PNPLA2       |
| 7937485 | -0,52 | -1,43 | 0,02793 | 1,18  | 2,27  | 0,03758 | NM_020376       | ---          |
| 7953761 | -0,52 | -1,43 | 0,09751 | -1,44 | -2,71 | 0,02087 | ---             | CTF1         |
| 7994961 | -0,52 | -1,43 | 0,23247 | -0,11 | -1,08 | 0,73099 | NM_001330       | ---          |
| 8027332 | -0,52 | -1,43 | 0,00140 | -0,60 | -1,52 | 0,06182 | ---             | LOC729595    |
| 8110520 | -0,52 | -1,43 | 0,17741 | -1,10 | -2,15 | 0,02795 | ENST00000451823 | ---          |
| 8100338 | -0,52 | -1,43 | 0,16345 | 0,60  | 1,52  | 0,07149 | ---             | ZNF8         |
| 8031893 | -0,52 | -1,43 | 0,08196 | 0,80  | 1,75  | 0,03724 | NM_021089       | ---          |
| 7956892 | -0,52 | -1,43 | 0,10893 | -0,60 | -1,52 | 0,11371 | ---             | ACSS1        |
| 8065444 | -0,52 | -1,43 | 0,23293 | -0,53 | -1,44 | 0,19376 | NM_032501       | NPEPL1       |
| 8063650 | -0,52 | -1,43 | 0,39687 | 0,66  | 1,58  | 0,26673 | NM_024663       | ---          |
| 8176815 | -0,52 | -1,43 | 0,26169 | -0,65 | -1,57 | 0,20665 | ---             | ---          |
| 8176941 | -0,52 | -1,43 | 0,26169 | -0,65 | -1,57 | 0,20665 | ---             | ---          |
| 8177393 | -0,52 | -1,43 | 0,26169 | -0,65 | -1,57 | 0,20665 | ---             | PHKA2        |
| 8171587 | -0,52 | -1,43 | 0,03892 | 1,88  | 3,69  | 0,00044 | NM_000292       | ---          |
| 8084126 | -0,52 | -1,43 | 0,05548 | -0,83 | -1,78 | 0,06060 | ---             | ---          |
| 8168841 | -0,52 | -1,43 | 0,09445 | -0,74 | -1,67 | 0,00185 | ---             | CARD16       |
| 7951408 | -0,52 | -1,43 | 0,39965 | -2,27 | -4,81 | 0,00055 | NM_052889       | C12orf69     |
| 7961503 | -0,52 | -1,43 | 0,32023 | -0,76 | -1,70 | 0,00813 | NM_001013698    | LOC440957    |
| 8080416 | -0,52 | -1,43 | 0,07410 | -0,06 | -1,04 | 0,80792 | NM_001124767    | SDCCAG1      |
| 7974245 | -0,52 | -1,43 | 0,44059 | -0,97 | -1,95 | 0,02312 | NM_004713       | TRIM3        |
| 7946180 | -0,52 | -1,43 | 0,05969 | -0,32 | -1,25 | 0,18551 | NM_006458       | GPR110       |
| 8126820 | -0,52 | -1,43 | 0,17967 | -0,43 | -1,35 | 0,02924 | NM_153840       | TMPPRS11F    |
| 8100688 | -0,52 | -1,43 | 0,14984 | -1,00 | -2,01 | 0,00887 | NM_207407       | ---          |
| 8042466 | -0,52 | -1,43 | 0,00974 | -1,39 | -2,61 | 0,03743 | ---             | C12orf76     |
| 7966293 | -0,52 | -1,43 | 0,36305 | -0,67 | -1,59 | 0,10269 | BC133010 FANCA  | ---          |
| 8003503 | -0,52 | -1,43 | 0,06421 | 1,03  | 2,05  | 0,01619 | NM_000135       | TAS2R46      |
| 7961293 | -0,52 | -1,43 | 0,06386 | -1,43 | -2,70 | 0,00039 | NM_176887       | PRR5L        |
| 7939383 | -0,52 | -1,43 | 0,19497 | -0,59 | -1,51 | 0,17676 | NM_024841       | ---          |

|         |       |       |         |       |       |         |                 |             |  |
|---------|-------|-------|---------|-------|-------|---------|-----------------|-------------|--|
| 7970511 | -0,52 | -1,43 | 0,12787 | -0,65 | -1,57 | 0,00595 | ---             | GBGT1       |  |
| 8164833 | -0,52 | -1,43 | 0,21364 | -0,61 | -1,52 | 0,15693 | NM_021996       | SPRR2E      |  |
| 7920214 | -0,52 | -1,43 | 0,24999 | -1,70 | -3,25 | 0,00132 | NM_001024209    | CYP4Z2P     |  |
| 7915896 | -0,52 | -1,43 | 0,54725 | 0,46  | 1,37  | 0,23218 | NR_002788       | MYADML      |  |
| 8051422 | -0,52 | -1,43 | 0,29325 | -1,91 | -3,77 | 0,00072 | NR_003143       | ---         |  |
| 8008049 | -0,52 | -1,43 | 0,39036 | -1,35 | -2,55 | 0,01072 | ---             | ACTA2       |  |
| 7929026 | -0,52 | -1,43 | 0,07732 | -0,55 | -1,47 | 0,03378 | NM_001141945    | ---         |  |
| 8161737 | -0,52 | -1,43 | 0,04441 | -0,37 | -1,29 | 0,25747 | ---             | KCNIP1      |  |
| 8109912 | -0,52 | -1,43 | 0,16976 | -0,72 | -1,65 | 0,08306 | NM_001034837    | ACSL6       |  |
| 8113938 | -0,52 | -1,43 | 0,39296 | -1,17 | -2,25 | 0,01612 | NM_015256       | ZNF789      |  |
| 8134613 | -0,52 | -1,43 | 0,13932 | -0,06 | -1,04 | 0,76607 | NM_213603       | CACNA1C     |  |
| 7953094 | -0,52 | -1,43 | 0,38348 | -1,23 | -2,34 | 0,00057 | NM_199460       | ECSIT       |  |
| 8034286 | -0,52 | -1,43 | 0,29451 | -0,39 | -1,31 | 0,21988 | NM_016581       | OR10Z1      |  |
| 7906372 | -0,52 | -1,43 | 0,13940 | -2,02 | -4,05 | 0,01141 | NM_001004478    | TP53TG5     |  |
| 8066521 | -0,52 | -1,43 | 0,11198 | -1,07 | -2,10 | 0,07985 | NM_014477       | ---         |  |
| 8008130 | -0,52 | -1,43 | 0,01203 | -1,15 | -2,22 | 0,02295 | ---             | CORIN       |  |
| 8100154 | -0,52 | -1,43 | 0,26012 | -0,53 | -1,45 | 0,05420 | NM_006587       | ---         |  |
| 8103693 | -0,52 | -1,43 | 0,03676 | -0,20 | -1,15 | 0,28123 | ---             | SNORD27     |  |
| 7948906 | -0,52 | -1,43 | 0,01589 | -0,34 | -1,27 | 0,22386 | NR_002563       | NOVA2       |  |
| 8037737 | -0,52 | -1,43 | 0,11275 | -0,77 | -1,71 | 0,08132 | NM_002516       | PP2672      |  |
| 7925170 | -0,52 | -1,43 | 0,12266 | -1,30 | -2,46 | 0,00744 | AF193050        | GRAMD2      |  |
| 7990138 | -0,52 | -1,43 | 0,19731 | 0,70  | 1,63  | 0,00702 | NM_001012642    | HCG8        |  |
| 8124691 | -0,52 | -1,43 | 0,50527 | -1,54 | -2,90 | 0,00074 | AY358246        | SLC12A3     |  |
| 7995868 | -0,52 | -1,43 | 0,22398 | -1,80 | -3,49 | 0,00894 | NM_000339       | SNORD115-12 |  |
| 7982016 | -0,52 | -1,43 | 0,59474 | -2,31 | -4,97 | 0,00093 | NR_003304       | SNORD115-12 |  |
| 7982024 | -0,52 | -1,43 | 0,59474 | -2,31 | -4,97 | 0,00093 | NR_003304       | SNORD115-12 |  |
| 7982030 | -0,52 | -1,43 | 0,59474 | -2,31 | -4,97 | 0,00093 | NR_003304       | ---         |  |
| 7939875 | -0,52 | -1,43 | 0,01809 | -0,79 | -1,73 | 0,00019 | ---             | C10orf90    |  |
| 7936996 | -0,52 | -1,43 | 0,17120 | -0,76 | -1,69 | 0,02714 | NM_001004298    | ---         |  |
| 7994339 | -0,52 | -1,43 | 0,09497 | -1,19 | -2,28 | 0,00192 | ---             | ---         |  |
| 8107518 | -0,52 | -1,43 | 0,09191 | -0,42 | -1,33 | 0,11834 | ---             | ---         |  |
| 7991770 | -0,52 | -1,44 | 0,02809 | -0,59 | -1,50 | 0,01050 | ---             | IFRD2       |  |
| 8087576 | -0,52 | -1,44 | 0,05935 | 0,75  | 1,68  | 0,07926 | NM_006764       | ---         |  |
| 8055305 | -0,52 | -1,44 | 0,05096 | -0,45 | -1,36 | 0,02203 | ---             | ---         |  |
| 7928746 | -0,52 | -1,44 | 0,10642 | -0,02 | -1,01 | 0,95695 | ---             | ---         |  |
| 8020464 | -0,52 | -1,44 | 0,14514 | -1,41 | -2,66 | 0,00002 | ---             | OR2J3       |  |
| 8117714 | -0,52 | -1,44 | 0,49623 | -1,11 | -2,16 | 0,04335 | NM_001005216    | ---         |  |
| 7915202 | -0,52 | -1,44 | 0,09033 | -1,20 | -2,30 | 0,05267 | ---             | OCM2        |  |
| 8141173 | -0,52 | -1,44 | 0,22555 | -0,76 | -1,69 | 0,05306 | NM_006188       | ACOT1       |  |
| 7975598 | -0,52 | -1,44 | 0,16655 | 0,63  | 1,55  | 0,19043 | NM_001037161    | CYP2D6      |  |
| 8076424 | -0,52 | -1,44 | 0,59174 | -0,99 | -1,99 | 0,25750 | NM_000106       | ACOT6       |  |
| 7975613 | -0,52 | -1,44 | 0,08626 | -0,56 | -1,48 | 0,10680 | NM_001037162    | ---         |  |
| 8147715 | -0,52 | -1,44 | 0,01061 | -1,01 | -2,02 | 0,01712 | ---             | C6orf191    |  |
| 8129476 | -0,52 | -1,44 | 0,18303 | -1,33 | -2,52 | 0,03394 | NM_001010876    | KRT77       |  |
| 7963502 | -0,52 | -1,44 | 0,07121 | -0,44 | -1,36 | 0,47593 | NM_175078       | SLFN13      |  |
| 8014248 | -0,52 | -1,44 | 0,10971 | 2,35  | 5,10  | 0,00005 | NM_144682       | MYPN        |  |
| 7927827 | -0,52 | -1,44 | 0,09908 | -0,92 | -1,90 | 0,02391 | NM_032578       | LOC728477   |  |
| 7986001 | -0,52 | -1,44 | 0,53007 | -0,35 | -1,27 | 0,40202 | ENST00000338706 | ---         |  |
| 8062404 | -0,52 | -1,44 | 0,22779 | -1,30 | -2,46 | 0,01858 | ---             | RGS8        |  |
| 7922727 | -0,52 | -1,44 | 0,14259 | -0,87 | -1,82 | 0,03888 | NM_001102450    | GPR128      |  |
| 8081298 | -0,52 | -1,44 | 0,25200 | -0,92 | -1,90 | 0,00530 | NM_032787       | TRIM47      |  |
| 8018494 | -0,52 | -1,44 | 0,15520 | 0,06  | 1,05  | 0,90067 | NM_033452       | ANKDD1A     |  |
| 7984227 | -0,52 | -1,44 | 0,23449 | -0,43 | -1,35 | 0,03728 | NM_182703       | DRD3        |  |
| 8089679 | -0,52 | -1,44 | 0,09640 | -1,39 | -2,62 | 0,02223 | NM_000796       | ---         |  |
| 7933632 | -0,52 | -1,44 | 0,06447 | -0,56 | -1,47 | 0,02230 | ---             | RNF165      |  |
| 8021120 | -0,52 | -1,44 | 0,30017 | -0,72 | -1,65 | 0,13303 | NM_152470       | C6orf108    |  |
| 8126524 | -0,52 | -1,44 | 0,42039 | 4,43  | 21,62 | 0,00109 | NM_199184       | OTP         |  |
| 8112763 | -0,52 | -1,44 | 0,23390 | -1,59 | -3,00 | 0,00475 | NM_032109       | COL11A1     |  |
| 7918064 | -0,52 | -1,44 | 0,13187 | -1,31 | -2,48 | 0,00116 | NM_001854       | SCN1A       |  |
| 8056457 | -0,52 | -1,44 | 0,06200 | -0,75 | -1,69 | 0,00011 | NM_001165963    | MIR331      |  |
| 7957631 | -0,52 | -1,44 | 0,23716 | -1,68 | -3,21 | 0,00025 | NR_029895       | ---         |  |
| 8167150 | -0,52 | -1,44 | 0,05697 | -1,03 | -2,05 | 0,02543 | ---             | SH3BP2      |  |
| 8093624 | -0,52 | -1,44 | 0,14748 | 0,72  | 1,64  | 0,14535 | NM_001145856    | TUT1        |  |
| 7948685 | -0,52 | -1,44 | 0,00262 | 0,41  | 1,33  | 0,24936 | NM_022830       | KRTAP6-2    |  |
| 8069848 | -0,52 | -1,44 | 0,17267 | -1,64 | -3,11 | 0,00977 | NM_181604       | NOL4        |  |
| 8022856 | -0,52 | -1,44 | 0,11698 | -0,66 | -1,58 | 0,13253 | NM_003787       | ---         |  |
| 7904923 | -0,52 | -1,44 | 0,21193 | -1,20 | -2,31 | 0,01805 | ---             | TTC31       |  |
| 8042874 | -0,52 | -1,44 | 0,04548 | 0,50  | 1,41  | 0,37841 | NM_022492       | LOC84856    |  |
| 7927099 | -0,52 | -1,44 | 0,47710 | -1,75 | -3,37 | 0,00906 | NR_026827       | ---         |  |
| 8139881 | -0,52 | -1,44 | 0,17981 | -0,46 | -1,37 | 0,33681 | ---             | STAB2       |  |
| 7958056 | -0,52 | -1,44 | 0,06250 | -1,21 | -2,32 | 0,02682 | NM_017564       | KRTAP10-6   |  |
| 8070786 | -0,52 | -1,44 | 0,35562 | -1,45 | -2,72 | 0,03400 | NM_198688       | MGC44328    |  |
| 8061167 | -0,52 | -1,44 | 0,31846 | -0,51 | -1,43 | 0,06053 | BC033985        | HOOK1       |  |

|           |       |       |         |       |       |         |                        |              |
|-----------|-------|-------|---------|-------|-------|---------|------------------------|--------------|
| 7901765   | -0,52 | -1,44 | 0,00114 | 2,30  | 4,92  | 0,01340 | NM_015888              | RGSL1        |
| 7907986   | -0,52 | -1,44 | 0,06055 | -0,78 | -1,71 | 0,03536 | NM_001137669           | LOC151009 // |
| LOC151009 |       |       |         |       |       |         |                        |              |
| 8044346   | -0,52 | -1,44 | 0,37898 | 2,86  | 7,24  | 0,00018 | NR_027244 // NR_027244 | GOLGA9P      |
| 7987114   | -0,52 | -1,44 | 0,23437 | -0,66 | -1,58 | 0,06909 | NR_024074              | IGSF21       |
| 7898521   | -0,52 | -1,44 | 0,19306 | -0,41 | -1,33 | 0,08532 | NM_032880              | SNORA65      |
| 8164215   | -0,52 | -1,44 | 0,21830 | -0,73 | -1,66 | 0,01229 | NR_002449              | ---          |
| 8107232   | -0,52 | -1,44 | 0,36444 | -1,83 | -3,56 | 0,01377 | ---                    | REP15        |
| 7954589   | -0,52 | -1,44 | 0,47726 | -1,12 | -2,17 | 0,00100 | NM_001029874           | C12orf72     |
| 7954701   | -0,52 | -1,44 | 0,09920 | -0,56 | -1,47 | 0,26053 | NM_173802              | LILRP2       |
| 8031253   | -0,53 | -1,44 | 0,32383 | -1,25 | -2,39 | 0,06986 | NR_003061              | SERPINA10    |
| 7981051   | -0,53 | -1,44 | 0,15205 | -1,53 | -2,89 | 0,00875 | NM_016186              | SPIN3        |
| 8173181   | -0,53 | -1,44 | 0,27212 | 1,22  | 2,32  | 0,00760 | NR_027139              | CACNA2D4     |
| 7960283   | -0,53 | -1,44 | 0,16408 | -1,15 | -2,22 | 0,00590 | NM_172364              | IFNA17       |
| 8160394   | -0,53 | -1,44 | 0,22039 | -1,59 | -3,01 | 0,00166 | NM_021268              | C16orf81     |
| 7997875   | -0,53 | -1,44 | 0,28065 | -0,90 | -1,86 | 0,00283 | NR_024347              | KIAA1486     |
| 8048763   | -0,53 | -1,44 | 0,08482 | -0,34 | -1,26 | 0,07986 | NM_020864              | B3GALT6      |
| 7896878   | -0,53 | -1,44 | 0,13210 | -0,28 | -1,21 | 0,56654 | NM_080605              | TMEM139      |
| 8136863   | -0,53 | -1,44 | 0,34375 | -0,80 | -1,74 | 0,23227 | NM_153345              | RIMBP3       |
| 8071532   | -0,53 | -1,44 | 0,09748 | -0,16 | -1,12 | 0,35748 | NM_015672              | NCRNA00204   |
| 8170963   | -0,53 | -1,44 | 0,09004 | -0,34 | -1,27 | 0,15706 | AY168775               | GPC5         |
| 7969596   | -0,53 | -1,44 | 0,02702 | -0,59 | -1,51 | 0,01023 | NM_004466              | ---          |
| 8078153   | -0,53 | -1,44 | 0,36368 | -0,50 | -1,41 | 0,34370 | ---                    | ---          |
| 7954098   | -0,53 | -1,44 | 0,03688 | -0,73 | -1,66 | 0,06812 | ---                    | FLJ39632     |
| 8074168   | -0,53 | -1,44 | 0,36511 | -1,52 | -2,87 | 0,02179 | ENST00000400192        | CDSN         |
| 8124862   | -0,53 | -1,44 | 0,58011 | -1,61 | -3,05 | 0,00984 | NM_001264              | TXK          |
| 8100210   | -0,53 | -1,44 | 0,10954 | -0,39 | -1,31 | 0,30433 | NM_003328              | ---          |
| 8085052   | -0,53 | -1,44 | 0,04761 | -1,10 | -2,15 | 0,11621 | ---                    | SORBS2       |
| 8104066   | -0,53 | -1,44 | 0,22350 | -1,65 | -3,14 | 0,00717 | AF090937               | ---          |
| 7943373   | -0,53 | -1,44 | 0,50590 | -1,97 | -3,92 | 0,01813 | ---                    | LEF1         |
| 8102232   | -0,53 | -1,44 | 0,32876 | -0,10 | -1,07 | 0,80859 | NM_016269              | ---          |
| 7928316   | -0,53 | -1,44 | 0,16324 | -0,80 | -1,74 | 0,03291 | ---                    | NRM          |
| 8178399   | -0,53 | -1,44 | 0,15152 | 2,28  | 4,86  | 0,04395 | NM_007243              | NRM          |
| 8179683   | -0,53 | -1,44 | 0,15152 | 2,28  | 4,86  | 0,04395 | NM_007243              | NT5C3        |
| 8138941   | -0,53 | -1,44 | 0,20610 | -0,60 | -1,51 | 0,30058 | NR_029372              | WFDC1        |
| 7997582   | -0,53 | -1,44 | 0,28316 | -1,71 | -3,27 | 0,00019 | NM_021197              | RBP4         |
| 7935116   | -0,53 | -1,44 | 0,28165 | 0,50  | 1,42  | 0,03139 | NM_006744              | KRT18        |
| 8154725   | -0,53 | -1,44 | 0,75869 | 2,74  | 6,69  | 0,03020 | NM_000224              | CLP1         |
| 7940046   | -0,53 | -1,44 | 0,31645 | 0,87  | 1,82  | 0,00503 | NM_006831              | ---          |
| 7928750   | -0,53 | -1,44 | 0,13983 | -1,51 | -2,86 | 0,02841 | ---                    | IL1RAPL2     |
| 8169094   | -0,53 | -1,44 | 0,02036 | -1,27 | -2,41 | 0,00003 | NM_017416              | GRIN2B       |
| 7961422   | -0,53 | -1,44 | 0,07215 | -0,99 | -1,99 | 0,02325 | NM_000834              | IQCF2        |
| 8080138   | -0,53 | -1,44 | 0,00546 | -1,12 | -2,17 | 0,04702 | NM_203424              | HRASLS       |
| 8084838   | -0,53 | -1,44 | 0,01440 | -0,43 | -1,35 | 0,39389 | NM_020386              | OVOS         |
| 7961026   | -0,53 | -1,44 | 0,16881 | 1,59  | 3,02  | 0,00085 | BX647938               | OLFM3        |
| 7918052   | -0,53 | -1,44 | 0,25768 | -0,78 | -1,71 | 0,00180 | NM_058170              | FRMPD4       |
| 8166028   | -0,53 | -1,44 | 0,05869 | -0,92 | -1,89 | 0,09333 | NM_014728              | SLC22A17     |
| 7977965   | -0,53 | -1,44 | 0,19398 | -0,06 | -1,04 | 0,92844 | NM_016609              | AMICA1       |
| 7952022   | -0,53 | -1,44 | 0,11355 | -0,52 | -1,43 | 0,01624 | NM_001098526           | NLRP1        |
| 8011884   | -0,53 | -1,44 | 0,16863 | -0,50 | -1,41 | 0,00856 | NM_033004              | C10orf108    |
| 7925813   | -0,53 | -1,44 | 0,06547 | -1,38 | -2,60 | 0,03304 | NR_027152              | RBM42        |
| 8027908   | -0,53 | -1,44 | 0,02723 | 0,58  | 1,50  | 0,05929 | NM_024321              | ---          |
| 8015737   | -0,53 | -1,44 | 0,46860 | -3,27 | -9,66 | 0,02017 | ---                    | C17orf62     |
| 8019507   | -0,53 | -1,44 | 0,06044 | 1,19  | 2,28  | 0,06572 | NM_001100407           | GNA15        |
| 8024572   | -0,53 | -1,44 | 0,23979 | 0,00  | 1,00  | 0,99990 | NM_002068              | ---          |
| 8076239   | -0,53 | -1,44 | 0,08512 | -1,14 | -2,20 | 0,00726 | ---                    | DNASE1L2     |
| 7992584   | -0,53 | -1,44 | 0,34299 | -0,64 | -1,55 | 0,01983 | NM_001374              | SPTBN4       |
| 8028806   | -0,53 | -1,44 | 0,10813 | -0,87 | -1,83 | 0,03975 | NM_020971              | PRDM15       |
| 8070503   | -0,53 | -1,44 | 0,00456 | 0,62  | 1,54  | 0,06067 | NM_001040424           | OR2AG1       |
| 7938170   | -0,53 | -1,44 | 0,32429 | -1,42 | -2,68 | 0,05057 | NM_001004489           | KCNIP2       |
| 7935930   | -0,53 | -1,44 | 0,35087 | -0,93 | -1,91 | 0,00152 | NM_014591              | C20orf197    |
| 8063785   | -0,53 | -1,44 | 0,09040 | -0,58 | -1,50 | 0,01479 | AY358539               | ---          |
| 8091556   | -0,53 | -1,44 | 0,18093 | -0,85 | -1,80 | 0,00670 | ---                    | KIAA1656     |
| 8075363   | -0,53 | -1,44 | 0,09768 | -1,23 | -2,35 | 0,03702 | CR456347               | ---          |
| 7979031   | -0,53 | -1,44 | 0,08187 | -0,85 | -1,80 | 0,06710 | ---                    | ---          |
| 7928363   | -0,53 | -1,44 | 0,01712 | -1,22 | -2,32 | 0,04263 | ---                    | ---          |
| 8120275   | -0,53 | -1,44 | 0,00802 | -0,21 | -1,16 | 0,20498 | ---                    | NDST3        |
| 8097038   | -0,53 | -1,44 | 0,02700 | -0,98 | -1,98 | 0,00707 | NM_004784              | ---          |
| 8138485   | -0,53 | -1,44 | 0,20030 | -0,44 | -1,35 | 0,14261 | ---                    | LRIT2        |
| 7934779   | -0,53 | -1,44 | 0,37757 | -0,85 | -1,81 | 0,01151 | NM_001017924           | ---          |
| 7970804   | -0,53 | -1,44 | 0,19344 | -0,99 | -1,98 | 0,00656 | ---                    | CYB561D2     |
| 8079993   | -0,53 | -1,44 | 0,06809 | -0,30 | -1,24 | 0,49069 | NM_007022              | LYZ          |
| 7957023   | -0,53 | -1,44 | 0,10537 | -0,59 | -1,50 | 0,02520 | NM_000239              | ---          |

|         |       |       |         |       |       |         |                 |                  |  |
|---------|-------|-------|---------|-------|-------|---------|-----------------|------------------|--|
| 8173928 | -0,53 | -1,44 | 0,52811 | -1,90 | -3,73 | 0,08502 | ---             | C19orf23         |  |
| 8032208 | -0,53 | -1,44 | 0,12367 | -0,23 | -1,17 | 0,34742 | NR_027271       | ---              |  |
| 8055087 | -0,53 | -1,44 | 0,19987 | -0,58 | -1,50 | 0,01031 | ---             | NLRP6            |  |
| 7937305 | -0,53 | -1,44 | 0,12252 | -0,52 | -1,43 | 0,16553 | NM_138329       | ---              |  |
| 7979730 | -0,53 | -1,44 | 0,13013 | -1,03 | -2,04 | 0,00023 | ---             | CXorf1           |  |
| 8170319 | -0,53 | -1,44 | 0,10330 | -1,18 | -2,27 | 0,03594 | NM_004709       | ZNF32            |  |
| 7933186 | -0,53 | -1,44 | 0,30989 | 0,78  | 1,71  | 0,04334 | NM_006973       | PLA2G4E          |  |
| 7987780 | -0,53 | -1,44 | 0,11391 | -0,70 | -1,62 | 0,04122 | NM_001080490    | ---              |  |
| 7956419 | -0,53 | -1,44 | 0,03403 | -1,29 | -2,44 | 0,00937 | ---             | ---              |  |
| 8024001 | -0,53 | -1,44 | 0,31836 | 0,31  | 1,24  | 0,44332 | ---             | ---              |  |
| 7970509 | -0,53 | -1,45 | 0,14643 | -1,49 | -2,80 | 0,06688 | ---             | DNAL4            |  |
| 8076161 | -0,53 | -1,45 | 0,37214 | -0,65 | -1,57 | 0,22813 | NM_005740       | KCNH4            |  |
| 8015554 | -0,53 | -1,45 | 0,20969 | -0,93 | -1,91 | 0,17086 | NM_012285       | EYS              |  |
| 8127393 | -0,53 | -1,45 | 0,12113 | -1,24 | -2,37 | 0,02779 | NM_001142800    | SNED1            |  |
| 8049752 | -0,53 | -1,45 | 0,08275 | -0,31 | -1,24 | 0,11112 | NM_001080437    | GJB6             |  |
| 7970448 | -0,53 | -1,45 | 0,25830 | -0,89 | -1,86 | 0,05498 | NM_001110219    | NKAIN4           |  |
| 8067602 | -0,53 | -1,45 | 0,11022 | -0,82 | -1,77 | 0,00972 | NM_152864       | ---              |  |
| 8047441 | -0,53 | -1,45 | 0,69811 | -2,12 | -4,36 | 0,15675 | ---             | GNLY             |  |
| 8043236 | -0,53 | -1,45 | 0,09800 | -0,67 | -1,60 | 0,00629 | NM_012483       | SCRN2            |  |
| 8016371 | -0,53 | -1,45 | 0,32664 | 0,76  | 1,70  | 0,02618 | NM_001145023    | CLYBL            |  |
| 7969815 | -0,53 | -1,45 | 0,14045 | 1,57  | 2,97  | 0,00259 | NM_206808       | ATP8B3           |  |
| 8032312 | -0,53 | -1,45 | 0,07342 | 1,03  | 2,04  | 0,05437 | NM_138813       | EFR3B            |  |
| 8040587 | -0,53 | -1,45 | 0,18083 | 0,16  | 1,12  | 0,21330 | NM_014971       | UMPS             |  |
| 8082229 | -0,53 | -1,45 | 0,21268 | 1,70  | 3,25  | 0,00049 | NM_000373       | CDKN2C           |  |
| 7901363 | -0,53 | -1,45 | 0,05497 | -0,30 | -1,23 | 0,33461 | NM_001262       | MEP1B            |  |
| 8020827 | -0,53 | -1,45 | 0,04661 | -0,30 | -1,23 | 0,02460 | NM_005925       | ---              |  |
| 8015037 | -0,53 | -1,45 | 0,15837 | 0,13  | 1,09  | 0,84244 | ---             | RPL22            |  |
| 7911989 | -0,53 | -1,45 | 0,24327 | -0,79 | -1,73 | 0,05125 | NM_000983       | SNORD47          |  |
| 7922402 | -0,53 | -1,45 | 0,29069 | 0,89  | 1,85  | 0,13467 | NR_002746       | ---              |  |
| 7985266 | -0,53 | -1,45 | 0,17582 | -0,82 | -1,76 | 0,12832 | ---             | BCORL2           |  |
| 8177229 | -0,53 | -1,45 | 0,14325 | -1,30 | -2,45 | 0,13367 | NM_001173413    | ARID3B           |  |
| 7984843 | -0,53 | -1,45 | 0,14909 | -0,50 | -1,41 | 0,29598 | NM_006465       | KDM2B            |  |
| 7967175 | -0,53 | -1,45 | 0,07897 | 2,22  | 4,65  | 0,00179 | NM_032590       | RCHY1            |  |
| 8095758 | -0,53 | -1,45 | 0,24293 | -0,22 | -1,16 | 0,03804 | NM_015436       | FLJ34503         |  |
| 8121569 | -0,53 | -1,45 | 0,19450 | -1,07 | -2,10 | 0,00373 | AK091822        | GPR12            |  |
| 7970691 | -0,53 | -1,45 | 0,22408 | -0,91 | -1,88 | 0,01500 | NM_005288       | CSMD1            |  |
| 8148992 | -0,53 | -1,45 | 0,01639 | -1,05 | -2,07 | 0,01264 | NM_033225       | ---              |  |
| 7919594 | -0,53 | -1,45 | 0,17762 | -0,77 | -1,71 | 0,03165 | ---             | PTPMT1           |  |
| 7939818 | -0,53 | -1,45 | 0,32838 | 1,72  | 3,29  | 0,03436 | NM_175732       | SYT2             |  |
| 7987010 | -0,53 | -1,45 | 0,38516 | -1,67 | -3,18 | 0,03823 | NM_177402       | MOG              |  |
| 8117748 | -0,53 | -1,45 | 0,07997 | -1,40 | -2,64 | 0,00382 | NM_206814       | CBS              |  |
| 8070632 | -0,53 | -1,45 | 0,05166 | 2,36  | 5,13  | 0,04936 | NM_001178008    | EPHA6            |  |
| 8081138 | -0,53 | -1,45 | 0,00302 | -0,96 | -1,95 | 0,00938 | NM_001080448    | DSCR9            |  |
| 8068543 | -0,53 | -1,45 | 0,08858 | -0,56 | -1,47 | 0,11773 | AB066100        | IRF8             |  |
| 7997712 | -0,53 | -1,45 | 0,11269 | 0,33  | 1,26  | 0,14551 | NM_002163       | F11              |  |
| 8098671 | -0,53 | -1,45 | 0,38045 | -0,66 | -1,58 | 0,02278 | NM_000128       | ---              |  |
| 7983500 | -0,53 | -1,45 | 0,31148 | -0,75 | -1,68 | 0,00084 | ---             | ---              |  |
| 7976057 | -0,53 | -1,45 | 0,02762 | -0,75 | -1,68 | 0,01043 | ---             | ---              |  |
| 8055482 | -0,53 | -1,45 | 0,09695 | -0,91 | -1,88 | 0,02127 | ---             | CRLF2            |  |
| 8171105 | -0,53 | -1,45 | 0,05806 | -1,06 | -2,08 | 0,08693 | NM_022148       | ---              |  |
| 8131301 | -0,53 | -1,45 | 0,03779 | -1,78 | -3,44 | 0,00148 | ---             | FAT2             |  |
| 8115302 | -0,53 | -1,45 | 0,11299 | -0,79 | -1,72 | 0,00517 | NM_001447       | GAFA1            |  |
| 7977592 | -0,53 | -1,45 | 0,16908 | -1,86 | -3,63 | 0,00066 | AF190748        | LTBP4            |  |
| 8028872 | -0,53 | -1,45 | 0,00777 | 1,47  | 2,77  | 0,08943 | NM_001042544    | NOS1AP           |  |
| 7906838 | -0,53 | -1,45 | 0,16568 | -0,96 | -1,94 | 0,00711 | NM_014697       | CLEC6A           |  |
| 7953737 | -0,53 | -1,45 | 0,16658 | -1,15 | -2,22 | 0,00043 | NM_001007033    | ERCC2            |  |
| 8037537 | -0,53 | -1,45 | 0,28866 | 1,99  | 3,97  | 0,01654 | NM_000400       | ---              |  |
| 8069446 | -0,54 | -1,45 | 0,31350 | -1,21 | -2,31 | 0,00127 | ---             | ---              |  |
| 8013109 | -0,54 | -1,45 | 0,13780 | -0,39 | -1,31 | 0,37147 | ---             | LOC646976        |  |
| 7922596 | -0,54 | -1,45 | 0,04189 | -1,40 | -2,64 | 0,01369 | AK096082        | ART4             |  |
| 7961507 | -0,54 | -1,45 | 0,22851 | -0,99 | -1,99 | 0,01207 | NM_021071       | AVPR2            |  |
| 8170794 | -0,54 | -1,45 | 0,13107 | -1,13 | -2,19 | 0,12575 | NM_001146151    | BRF1             |  |
| 7981573 | -0,54 | -1,45 | 0,01143 | 0,41  | 1,33  | 0,01123 | NM_145685       | ZNF799 // ZNF799 |  |
| 8034390 | -0,54 | -1,45 | 0,59076 | 0,09  | 1,06  | 0,46838 | NM_001080821 // | NM_001080821     |  |
| MAPT    |       |       |         |       |       |         |                 |                  |  |
| 8007828 | -0,54 | -1,45 | 0,09967 | 1,28  | 2,43  | 0,05376 | NM_016835       | C2orf83          |  |
| 8059532 | -0,54 | -1,45 | 0,12923 | -1,49 | -2,81 | 0,01955 | NM_020161       | SPINK7           |  |
| 8109049 | -0,54 | -1,45 | 0,05282 | -1,27 | -2,41 | 0,06140 | NM_032566       | FETUB            |  |
| 8084657 | -0,54 | -1,45 | 0,05871 | -0,81 | -1,75 | 0,00736 | NM_014375       | CD300LF          |  |
| 8018196 | -0,54 | -1,45 | 0,21949 | -1,52 | -2,87 | 0,01723 | NM_139018       | ---              |  |
| 8151585 | -0,54 | -1,45 | 0,08033 | -1,29 | -2,45 | 0,00095 | ---             | TRIM31           |  |
| 8179617 | -0,54 | -1,45 | 0,23369 | -0,86 | -1,82 | 0,13002 | NM_007028       | RRAS2            |  |
| 7946697 | -0,54 | -1,45 | 0,51377 | 0,05  | 1,04  | 0,94781 | NM_012250       | OR4K14           |  |



|         |       |       |         |       |       |         |                 |              |
|---------|-------|-------|---------|-------|-------|---------|-----------------|--------------|
| 7977476 | -0,54 | -1,45 | 0,34039 | -1,71 | -3,28 | 0,00658 | NM_001004712    | IL12RB1      |
| 8035380 | -0,54 | -1,45 | 0,32550 | -1,34 | -2,52 | 0,00362 | NM_0055535      | TMEM219      |
| 7994683 | -0,54 | -1,45 | 0,03750 | -0,16 | -1,12 | 0,34463 | NM_001083613    | GDAP1        |
| 8146945 | -0,54 | -1,45 | 0,32393 | 0,83  | 1,78  | 0,00476 | NM_018972       | FLJ10357     |
| 7973158 | -0,54 | -1,45 | 0,02381 | -0,68 | -1,60 | 0,01224 | NM_018071       | ---          |
| 8175297 | -0,54 | -1,45 | 0,06637 | -0,57 | -1,49 | 0,05910 | ---             | PRO0611      |
| 7899602 | -0,54 | -1,45 | 0,22420 | -0,62 | -1,54 | 0,00085 | NR_002762       | FBLL1        |
| 8109819 | -0,54 | -1,45 | 0,43386 | -1,84 | -3,57 | 0,00352 | NR_024356       | ---          |
| 7928314 | -0,54 | -1,45 | 0,04413 | -0,26 | -1,19 | 0,08344 | ---             | SERPINB12    |
| 8021594 | -0,54 | -1,45 | 0,00409 | -0,47 | -1,39 | 0,03613 | NM_080474       | CSMD2        |
| 7914667 | -0,54 | -1,45 | 0,00938 | -1,18 | -2,27 | 0,00189 | NM_052896       | C18orf2      |
| 8021995 | -0,54 | -1,45 | 0,11585 | -0,78 | -1,72 | 0,03029 | NR_023925       | POLG         |
| 7991258 | -0,54 | -1,45 | 0,24906 | -0,19 | -1,14 | 0,52145 | NM_002693       | CLCA2        |
| 7902702 | -0,54 | -1,45 | 0,21317 | -0,70 | -1,62 | 0,07466 | NM_006536       | GRPR         |
| 8166202 | -0,54 | -1,45 | 0,00577 | -0,29 | -1,22 | 0,05534 | NM_005314       | LOC339240    |
| 8013473 | -0,54 | -1,45 | 0,38649 | -1,42 | -2,68 | 0,02936 | AK127974        | ---          |
| 7936280 | -0,54 | -1,45 | 0,41751 | -1,11 | -2,16 | 0,09358 | ---             | C9orf9       |
| 8158930 | -0,54 | -1,45 | 0,12520 | -0,37 | -1,30 | 0,51337 | NM_018956       | FRMPD2       |
| 7933446 | -0,54 | -1,45 | 0,35003 | -1,81 | -3,51 | 0,02585 | NM_001018071    | ---          |
| 8037814 | -0,54 | -1,45 | 0,13706 | -0,59 | -1,51 | 0,07605 | ---             | ---          |
| 8143562 | -0,54 | -1,45 | 0,11020 | -1,24 | -2,36 | 0,01936 | ---             | CCDC87       |
| 7949668 | -0,54 | -1,45 | 0,22346 | -0,22 | -1,17 | 0,45718 | NM_018219       | SLC15A3      |
| 7948493 | -0,54 | -1,45 | 0,09353 | -0,86 | -1,81 | 0,02634 | NM_016582       | LOC646813    |
| 7939902 | -0,54 | -1,45 | 0,27640 | 0,43  | 1,35  | 0,03037 | NR_024504       | LCE2D        |
| 7905500 | -0,54 | -1,45 | 0,39897 | -1,25 | -2,38 | 0,04657 | NM_178430       | FAM71B       |
| 8115481 | -0,54 | -1,45 | 0,01914 | -1,45 | -2,74 | 0,00305 | NM_130899       | ---          |
| 8000930 | -0,54 | -1,45 | 0,20928 | -0,74 | -1,67 | 0,01216 | ---             | ---          |
| 7950895 | -0,54 | -1,45 | 0,01933 | -1,12 | -2,18 | 0,00218 | ---             | ---          |
| 7927745 | -0,54 | -1,45 | 0,09391 | -1,03 | -2,04 | 0,00662 | ---             | ---          |
| 8154392 | -0,54 | -1,45 | 0,23821 | -1,45 | -2,73 | 0,00719 | ---             | PSG1         |
| 8037240 | -0,54 | -1,45 | 0,55063 | -0,13 | -1,10 | 0,49487 | NM_006905       | SCARNA9L     |
| 8171758 | -0,54 | -1,45 | 0,05275 | -1,02 | -2,03 | 0,02626 | NR_023358       | CDC45        |
| 7949364 | -0,54 | -1,45 | 0,28914 | 0,92  | 1,89  | 0,07829 | NM_080668       | GFER         |
| 7992439 | -0,54 | -1,45 | 0,04873 | 0,61  | 1,53  | 0,03281 | NM_005262       | ---          |
| 8056020 | -0,54 | -1,45 | 0,03891 | -0,76 | -1,69 | 0,00114 | ---             | OR5D13       |
| 7939940 | -0,54 | -1,45 | 0,14829 | -1,60 | -3,02 | 0,01459 | NM_001001967    | ---          |
| 8063522 | -0,54 | -1,45 | 0,01361 | -0,77 | -1,71 | 0,00391 | ---             | TUBA3D       |
| 8045291 | -0,54 | -1,45 | 0,33193 | -0,87 | -1,83 | 0,03714 | NM_080386       | FLJ38723     |
| 7989476 | -0,54 | -1,45 | 0,17147 | -0,39 | -1,31 | 0,24382 | AK096042 STK33  | ---          |
| 7946365 | -0,54 | -1,45 | 0,00714 | 1,59  | 3,01  | 0,00263 | NM_030906       | C1orf93      |
| 7897119 | -0,54 | -1,45 | 0,21597 | -0,36 | -1,28 | 0,31406 | AF425266 OR2G2  | ---          |
| 7911207 | -0,54 | -1,45 | 0,42654 | -1,05 | -2,07 | 0,03920 | NM_001001915    | LOC100130264 |
| 8065248 | -0,54 | -1,45 | 0,23888 | -1,37 | -2,58 | 0,06963 | AK097497 ABCD4  | ---          |
| 7980115 | -0,54 | -1,45 | 0,02868 | 1,02  | 2,03  | 0,00867 | NM_005050       | PMP2         |
| 8151525 | -0,54 | -1,45 | 0,01613 | -1,32 | -2,50 | 0,01551 | NM_002677       | TBC1D3G      |
| 8014437 | -0,54 | -1,45 | 0,42429 | 1,25  | 2,38  | 0,06724 | NM_001040282    | CEACAM16     |
| 8029458 | -0,54 | -1,45 | 0,01005 | -0,94 | -1,92 | 0,00661 | NM_001039213    | LRRTM4       |
| 8053315 | -0,54 | -1,45 | 0,02751 | -0,50 | -1,41 | 0,13017 | NM_024993       | C9orf43      |
| 8157308 | -0,54 | -1,45 | 0,04536 | -0,19 | -1,14 | 0,09973 | BC026884 RPS6P6 | ---          |
| 8101357 | -0,54 | -1,45 | 0,29600 | -0,60 | -1,52 | 0,01843 | BC052613 NSFL1C | ---          |
| 8064438 | -0,54 | -1,45 | 0,13161 | 0,96  | 1,95  | 0,14445 | NM_016143       | NFKBIE       |
| 8126666 | -0,54 | -1,45 | 0,01354 | -0,19 | -1,14 | 0,74757 | NM_004556       | VPREB1       |
| 8071646 | -0,54 | -1,45 | 0,12076 | -1,27 | -2,42 | 0,00002 | NM_007128       | GPR26        |
| 7931199 | -0,54 | -1,45 | 0,15300 | -0,94 | -1,93 | 0,01291 | NM_153442       | ---          |
| 7903115 | -0,54 | -1,45 | 0,07078 | -1,27 | -2,42 | 0,02816 | ---             | C11orf16     |
| 7946428 | -0,54 | -1,45 | 0,18156 | -1,11 | -2,16 | 0,02766 | NM_020643       | SNORD79      |
| 7922406 | -0,54 | -1,46 | 0,10421 | -0,50 | -1,41 | 0,04962 | NR_003939       | TMEM57       |
| 7899018 | -0,54 | -1,46 | 0,11018 | -0,24 | -1,18 | 0,35098 | NM_018202       | ZNF546       |
| 8028770 | -0,54 | -1,46 | 0,15390 | -0,15 | -1,11 | 0,36106 | NM_178544       | AMT          |
| 8087419 | -0,54 | -1,46 | 0,06225 | -0,16 | -1,12 | 0,60916 | NM_000481       | LRRC3        |
| 8069122 | -0,54 | -1,46 | 0,09994 | -0,94 | -1,92 | 0,01827 | NM_030891       | DEFB131      |
| 8094139 | -0,54 | -1,46 | 0,00221 | -0,50 | -1,41 | 0,09209 | NM_001040448    | ---          |
| 7898371 | -0,54 | -1,46 | 0,40643 | -1,30 | -2,46 | 0,00511 | ---             | ---          |
| 7912861 | -0,54 | -1,46 | 0,40643 | -1,30 | -2,46 | 0,00511 | ---             | ---          |
| 8079999 | -0,54 | -1,46 | 0,01416 | -0,53 | -1,45 | 0,21545 | ---             | NAA30        |
| 7974576 | -0,54 | -1,46 | 0,01919 | 0,80  | 1,74  | 0,00414 | NM_001011713    | MSGN1        |
| 8040456 | -0,54 | -1,46 | 0,48887 | -1,04 | -2,05 | 0,03218 | NM_001105569    | ---          |
| 8169965 | -0,54 | -1,46 | 0,07926 | -0,10 | -1,07 | 0,77757 | ---             | CCDC29       |
| 8161415 | -0,54 | -1,46 | 0,12883 | -0,11 | -1,08 | 0,79474 | ENST00000305962 | SLC26A4      |
| 8135436 | -0,54 | -1,46 | 0,24637 | -0,93 | -1,90 | 0,09145 | NM_000441       | POU4F1       |
| 7972177 | -0,54 | -1,46 | 0,22311 | -0,37 | -1,29 | 0,23745 | NM_006237       | ---          |
| 7974253 | -0,54 | -1,46 | 0,20795 | -0,74 | -1,67 | 0,13981 | ---             | C17orf99     |
| 8010237 | -0,54 | -1,46 | 0,24295 | -0,48 | -1,39 | 0,24728 | NM_001163075    | ---          |

|         |       |       |         |       |        |         |              |           |  |
|---------|-------|-------|---------|-------|--------|---------|--------------|-----------|--|
| 7962199 | -0,54 | -1,46 | 0,26820 | -0,31 | -1,24  | 0,02867 | ---          | OR6C6     |  |
| 7963865 | -0,54 | -1,46 | 0,01153 | -1,17 | -2,25  | 0,02640 | NM_001005493 | ---       |  |
| 8139933 | -0,54 | -1,46 | 0,02271 | -1,26 | -2,40  | 0,01280 | ---          | SNORD63   |  |
| 8114468 | -0,54 | -1,46 | 0,00998 | -0,62 | -1,53  | 0,00041 | NR_002913    | NUDT14    |  |
| 7981566 | -0,54 | -1,46 | 0,14169 | 0,76  | 1,69   | 0,18778 | NM_177533    | PCDHB18   |  |
| 8108749 | -0,54 | -1,46 | 0,21692 | -0,61 | -1,52  | 0,00061 | NR_001281    | HOXB5     |  |
| 8016457 | -0,54 | -1,46 | 0,28181 | -0,55 | -1,46  | 0,09452 | NM_002147    | TTL6      |  |
| 8016494 | -0,54 | -1,46 | 0,22174 | -0,78 | -1,71  | 0,00374 | NM_173623    | ---       |  |
| 8156194 | -0,54 | -1,46 | 0,30808 | -1,57 | -2,98  | 0,00567 | ---          | DOCK2     |  |
| 8109843 | -0,54 | -1,46 | 0,07453 | -1,41 | -2,65  | 0,00927 | NM_004946    | METTL2A   |  |
| 8009008 | -0,54 | -1,46 | 0,00412 | 1,49  | 2,81   | 0,04694 | NM_181725    | ---       |  |
| 8132501 | -0,54 | -1,46 | 0,08607 | -1,02 | -2,03  | 0,01219 | ---          | LOC441666 |  |
| 8155634 | -0,54 | -1,46 | 0,00019 | -0,46 | -1,38  | 0,05584 | NR_024380    | HOXC8     |  |
| 7955869 | -0,54 | -1,46 | 0,18129 | 1,45  | 2,74   | 0,01656 | NM_022658    | FLT4      |  |
| 8116445 | -0,54 | -1,46 | 0,00135 | 0,66  | 1,58   | 0,05543 | NM_182925    | LONRF2    |  |
| 8054281 | -0,54 | -1,46 | 0,31382 | 0,79  | 1,72   | 0,02672 | NM_198461    | C1orf182  |  |
| 7906154 | -0,54 | -1,46 | 0,01937 | -0,31 | -1,24  | 0,18937 | NM_144627    | ---       |  |
| 7986767 | -0,54 | -1,46 | 0,32822 | -1,42 | -2,67  | 0,04692 | ---          | P2RY14    |  |
| 8091511 | -0,54 | -1,46 | 0,10887 | -0,59 | -1,50  | 0,07214 | NM_014879    | C10orf107 |  |
| 7927723 | -0,54 | -1,46 | 0,14468 | -0,77 | -1,70  | 0,01045 | NM_173554    | WDR72     |  |
| 7988990 | -0,54 | -1,46 | 0,14328 | -1,13 | -2,19  | 0,00859 | NM_182758    | IFI27     |  |
| 7976443 | -0,54 | -1,46 | 0,30598 | -1,42 | -2,67  | 0,00922 | NM_001130080 | OR6C65    |  |
| 7955995 | -0,54 | -1,46 | 0,26802 | -0,93 | -1,90  | 0,11466 | NM_001005518 | KLF8      |  |
| 8167912 | -0,54 | -1,46 | 0,02839 | 0,41  | 1,33   | 0,09806 | NM_007250    | TBXAS1    |  |
| 8136557 | -0,54 | -1,46 | 0,00277 | -0,43 | -1,35  | 0,00248 | NM_001130966 | ---       |  |
| 7954699 | -0,54 | -1,46 | 0,01509 | -0,91 | -1,88  | 0,04317 | ---          | ---       |  |
| 7981720 | -0,54 | -1,46 | 0,73029 | -3,63 | -12,40 | 0,00529 | ---          | ---       |  |
| 7944525 | -0,54 | -1,46 | 0,48699 | -1,72 | -3,28  | 0,02396 | ---          | SSX7      |  |
| 8172781 | -0,54 | -1,46 | 0,20812 | -0,60 | -1,51  | 0,04066 | NM_173358    | GPR65     |  |
| 7976080 | -0,54 | -1,46 | 0,01049 | -1,31 | -2,48  | 0,00607 | NM_003608    | CAMTA1    |  |
| 7897339 | -0,54 | -1,46 | 0,42298 | 1,18  | 2,27   | 0,08701 | NM_015215    | MAP2K2    |  |
| 8032761 | -0,54 | -1,46 | 0,46043 | 0,26  | 1,19   | 0,71389 | NM_030662    | GPSM1     |  |
| 8159318 | -0,54 | -1,46 | 0,27150 | 0,10  | 1,07   | 0,84331 | NM_001145638 | TRIM42    |  |
| 8083053 | -0,55 | -1,46 | 0,22102 | -0,99 | -1,98  | 0,00347 | NM_152616    | OR1G1     |  |
| 8011324 | -0,55 | -1,46 | 0,25689 | -1,64 | -3,12  | 0,04411 | NM_003555    | ---       |  |
| 7926979 | -0,55 | -1,46 | 0,56715 | -1,23 | -2,34  | 0,01930 | ---          | TCEB3CL   |  |
| 8023152 | -0,55 | -1,46 | 0,57135 | -2,05 | -4,13  | 0,00840 | NM_001100817 | KIF24     |  |
| 8160771 | -0,55 | -1,46 | 0,06324 | 0,02  | 1,01   | 0,80876 | NM_194313    | SLC4A2    |  |
| 8137352 | -0,55 | -1,46 | 0,00211 | 0,61  | 1,52   | 0,21654 | NM_003040    | USP17L6P  |  |
| 8094134 | -0,55 | -1,46 | 0,81536 | -2,95 | -7,74  | 0,00403 | NR_027279    | NCAPH     |  |
| 8043602 | -0,55 | -1,46 | 0,35211 | 1,20  | 2,30   | 0,01021 | NM_015341    | RTP1      |  |
| 8084726 | -0,55 | -1,46 | 0,17417 | -0,85 | -1,80  | 0,13733 | NM_153708    | OR2T5     |  |
| 7911285 | -0,55 | -1,46 | 0,04199 | -1,03 | -2,04  | 0,13423 | NM_001004697 | PELI3     |  |
| 7941610 | -0,55 | -1,46 | 0,06067 | -0,16 | -1,12  | 0,50145 | NM_145065    | SUN2      |  |
| 8076137 | -0,55 | -1,46 | 0,19151 | -0,12 | -1,08  | 0,82069 | NM_015374    | ACSF3     |  |
| 7997863 | -0,55 | -1,46 | 0,32302 | 0,25  | 1,19   | 0,56626 | NM_174917    | DNAH8     |  |
| 8119243 | -0,55 | -1,46 | 0,00905 | -0,73 | -1,65  | 0,00443 | NM_001371    | GABRR3    |  |
| 8089060 | -0,55 | -1,46 | 0,08695 | -0,77 | -1,70  | 0,03647 | NM_001105580 | C1orf200  |  |
| 7912254 | -0,55 | -1,46 | 0,31046 | -1,66 | -3,15  | 0,00039 | NR_027045    | TNIP2     |  |
| 8099029 | -0,55 | -1,46 | 0,13954 | 1,16  | 2,23   | 0,12632 | NM_024309    | ---       |  |
| 8173338 | -0,55 | -1,46 | 0,27726 | -0,93 | -1,91  | 0,03907 | ---          | SCGB1D2   |  |
| 7940630 | -0,55 | -1,46 | 0,11196 | -1,06 | -2,09  | 0,02421 | NM_006551    | FAM189A1  |  |
| 7986960 | -0,55 | -1,46 | 0,11624 | -0,61 | -1,53  | 0,05560 | NM_015307    | ---       |  |
| 8006606 | -0,55 | -1,46 | 0,25042 | -1,15 | -2,21  | 0,02318 | ---          | MRPL11    |  |
| 7949637 | -0,55 | -1,46 | 0,16663 | 0,84  | 1,79   | 0,15088 | NM_170739    | CYP2D7P1  |  |
| 8076431 | -0,55 | -1,46 | 0,19116 | -1,63 | -3,10  | 0,04822 | NR_002570    | TSTA3     |  |
| 8153474 | -0,55 | -1,46 | 0,32284 | 2,34  | 5,07   | 0,01521 | NM_003313    | PAGE4     |  |
| 8167592 | -0,55 | -1,46 | 0,11740 | -0,72 | -1,65  | 0,15614 | NM_007003    | CSN1S1    |  |
| 8095412 | -0,55 | -1,46 | 0,05412 | -1,16 | -2,24  | 0,02311 | NM_001890    | LOC387646 |  |
| 7932721 | -0,55 | -1,46 | 0,17108 | 1,06  | 2,09   | 0,05113 | NR_003525    | ABC88     |  |
| 8137310 | -0,55 | -1,46 | 0,22755 | 0,28  | 1,21   | 0,43238 | NM_007188    | E4F1      |  |
| 7992568 | -0,55 | -1,46 | 0,10109 | 0,04  | 1,03   | 0,91213 | NM_004424    | GOLGA8E   |  |
| 7981874 | -0,55 | -1,46 | 0,24873 | -0,36 | -1,28  | 0,24354 | NR_033350    | ---       |  |
| 7934968 | -0,55 | -1,46 | 0,18474 | -1,05 | -2,07  | 0,00016 | ---          | LOC619207 |  |
| 7931623 | -0,55 | -1,46 | 0,21726 | -1,20 | -2,29  | 0,00122 | NR_002934    | PKD2L2    |  |
| 8108267 | -0,55 | -1,46 | 0,09042 | -0,71 | -1,63  | 0,06615 | NM_014386    | ---       |  |
| 8101063 | -0,55 | -1,46 | 0,33226 | -0,91 | -1,88  | 0,06688 | ---          | ---       |  |
| 8063026 | -0,55 | -1,46 | 0,02763 | -1,07 | -2,11  | 0,04241 | ---          | OR2J3     |  |
| 8177694 | -0,55 | -1,46 | 0,45695 | -1,18 | -2,26  | 0,00764 | NM_001005216 | OR2J3     |  |
| 8179003 | -0,55 | -1,46 | 0,45695 | -1,18 | -2,26  | 0,00764 | NM_001005216 | CXorf66   |  |
| 8175524 | -0,55 | -1,46 | 0,06553 | -0,60 | -1,51  | 0,06114 | NM_001013403 | IKZF1     |  |
| 8132819 | -0,55 | -1,46 | 0,06127 | -1,80 | -3,49  | 0,05955 | NM_006060    | C9orf125  |  |
| 8162902 | -0,55 | -1,46 | 0,01680 | -0,60 | -1,52  | 0,02825 | NM_032342    | BTBD6     |  |

|                                                                                                                      |       |       |         |       |        |         |                 |                    |
|----------------------------------------------------------------------------------------------------------------------|-------|-------|---------|-------|--------|---------|-----------------|--------------------|
| 7977340                                                                                                              | -0,55 | -1,46 | 0,08130 | 1,60  | 3,03   | 0,01389 | NM_033271       | CACNA2D3           |
| 8080578                                                                                                              | -0,55 | -1,46 | 0,29442 | -0,66 | -1,58  | 0,03289 | NM_018398       | OC90               |
| 8152924                                                                                                              | -0,55 | -1,46 | 0,18016 | -1,66 | -3,16  | 0,00386 | NM_001080399    | LOC391742 //       |
| LOC391742 // |       |       |         |       |        |         |                 |                    |
| 8104613                                                                                                              | -0,55 | -1,46 | 0,49107 | -2,04 | -4,10  | 0,00066 | ENST00000330110 | // ENST00000330110 |
| // ENST00000330110 // ENST00000330110 // ENST00000330110 // ENST00000330110 // ENST00000330110 // ENST00000330110 // |       |       |         |       |        |         |                 |                    |
| ENST00000330110 // ENST00000330110 CCNI2                                                                             |       |       |         |       |        |         |                 |                    |
| 8107985                                                                                                              | -0,55 | -1,46 | 0,20882 | -0,31 | -1,24  | 0,69692 | NM_001039780    | ---                |
| 8062117                                                                                                              | -0,55 | -1,46 | 0,00880 | -1,06 | -2,08  | 0,02586 | ---             | ZNF793             |
| 8028254                                                                                                              | -0,55 | -1,46 | 0,02651 | -0,52 | -1,43  | 0,20574 | NM_001013659    | RPUSD1             |
| 7998367                                                                                                              | -0,55 | -1,46 | 0,04234 | -0,11 | -1,08  | 0,84743 | NM_058192       | ---                |
| 8150974                                                                                                              | -0,55 | -1,46 | 0,04898 | -1,15 | -2,22  | 0,01857 | ---             | OR51F1             |
| 7945999                                                                                                              | -0,55 | -1,46 | 0,04425 | -1,61 | -3,05  | 0,00255 | NM_001004752    | AFF2               |
| 8170364                                                                                                              | -0,55 | -1,46 | 0,23804 | -1,40 | -2,63  | 0,00024 | NM_002025       | HNF4G              |
| 8146986                                                                                                              | -0,55 | -1,46 | 0,26506 | -0,65 | -1,57  | 0,14997 | NM_004133       | KCTD19             |
| 8002005                                                                                                              | -0,55 | -1,46 | 0,02854 | 0,36  | 1,29   | 0,06841 | NM_001100915    | IL18RAP            |
| 8044049                                                                                                              | -0,55 | -1,46 | 0,01895 | -0,76 | -1,69  | 0,02065 | NM_003853       | ---                |
| 8116829                                                                                                              | -0,55 | -1,46 | 0,04882 | -1,24 | -2,35  | 0,02598 | ---             | SNORD1C            |
| 8010078                                                                                                              | -0,55 | -1,46 | 0,00765 | -0,18 | -1,13  | 0,40711 | NR_004397       | TAF7L              |
| 8174029                                                                                                              | -0,55 | -1,46 | 0,01716 | 0,50  | 1,41   | 0,04323 | NM_001168474    | MBD3L2             |
| 8033352                                                                                                              | -0,55 | -1,46 | 0,36416 | -1,52 | -2,87  | 0,00003 | NM_144614       | ATOH7              |
| 7933978                                                                                                              | -0,55 | -1,46 | 0,03678 | -0,81 | -1,75  | 0,04913 | NM_145178       | ALMS1P             |
| 8042761                                                                                                              | -0,55 | -1,46 | 0,15410 | -0,62 | -1,54  | 0,15745 | NR_003683       | OBSCN              |
| 7910265                                                                                                              | -0,55 | -1,46 | 0,04335 | -0,12 | -1,09  | 0,58114 | NM_001098623    | HOXA1              |
| 8138708                                                                                                              | -0,55 | -1,46 | 0,08187 | 2,79  | 6,94   | 0,00002 | NM_005522       | CCDC83             |
| 7942896                                                                                                              | -0,55 | -1,46 | 0,19332 | -0,95 | -1,93  | 0,02255 | NM_173556       | FLJ39632           |
| 7977452                                                                                                              | -0,55 | -1,46 | 0,34853 | -1,48 | -2,79  | 0,02544 | ENST00000400192 | C6orf134           |
| 8117965                                                                                                              | -0,55 | -1,46 | 0,08648 | 1,14  | 2,21   | 0,00116 | NM_024909       | C6orf134           |
| 8179149                                                                                                              | -0,55 | -1,46 | 0,08648 | 1,14  | 2,21   | 0,00116 | NM_024909       | ZNF750             |
| 8019541                                                                                                              | -0,55 | -1,46 | 0,05586 | -0,88 | -1,84  | 0,03641 | NM_024702       | FER1L4             |
| 8065920                                                                                                              | -0,55 | -1,46 | 0,25819 | -0,94 | -1,92  | 0,02157 | NR_024377       | CCDC24             |
| 7900944                                                                                                              | -0,55 | -1,46 | 0,34561 | -1,01 | -2,01  | 0,07436 | NM_152499       | ---                |
| 8124549                                                                                                              | -0,55 | -1,46 | 0,04221 | -1,15 | -2,22  | 0,06689 | ---             | SNORA31            |
| 7971386                                                                                                              | -0,55 | -1,46 | 0,06910 | -0,80 | -1,74  | 0,10493 | NR_002967       | TMEM31             |
| 8169056                                                                                                              | -0,55 | -1,46 | 0,13146 | -1,67 | -3,19  | 0,01002 | NM_182541       | SPINT4             |
| 8063019                                                                                                              | -0,55 | -1,46 | 0,03174 | -0,88 | -1,84  | 0,04053 | NM_178455       | IL15               |
| 8097553                                                                                                              | -0,55 | -1,46 | 0,07532 | -0,69 | -1,61  | 0,00702 | NM_172174       | ---                |
| 8014142                                                                                                              | -0,55 | -1,46 | 0,27514 | -0,72 | -1,65  | 0,17170 | ---             | ALPP               |
| 8049123                                                                                                              | -0,55 | -1,46 | 0,12981 | -2,49 | -5,61  | 0,00103 | NM_001632       | RPH3A              |
| 7958860                                                                                                              | -0,55 | -1,46 | 0,23492 | -1,22 | -2,33  | 0,01771 | NM_001143854    | CCDC97             |
| 8029050                                                                                                              | -0,55 | -1,46 | 0,04208 | 1,75  | 3,37   | 0,08768 | NM_052848       | ---                |
| 8081053                                                                                                              | -0,55 | -1,46 | 0,11089 | -1,17 | -2,25  | 0,03506 | ---             | LIPJ               |
| 7928967                                                                                                              | -0,55 | -1,46 | 0,43924 | -0,85 | -1,81  | 0,00029 | NM_001010939    | BPA-1              |
| 7902072                                                                                                              | -0,55 | -1,46 | 0,04689 | -1,28 | -2,43  | 0,04784 | AB088847        | LOC100289528       |
| 8161373                                                                                                              | -0,55 | -1,46 | 0,58950 | -4,12 | -17,43 | 0,00016 | ENST00000438157 | LOC100289528       |
| 8161554                                                                                                              | -0,55 | -1,46 | 0,58950 | -4,12 | -17,43 | 0,00016 | ENST00000438157 | ---                |
| 7897439                                                                                                              | -0,55 | -1,46 | 0,05675 | -1,27 | -2,42  | 0,00076 | ---             | ---                |
| 8051411                                                                                                              | -0,55 | -1,46 | 0,30388 | -1,70 | -3,26  | 0,00056 | ---             | ---                |
| 8116479                                                                                                              | -0,55 | -1,46 | 0,05331 | -1,03 | -2,05  | 0,00017 | ---             | LOC148696          |
| 7909418                                                                                                              | -0,55 | -1,46 | 0,28586 | -1,13 | -2,19  | 0,03637 | NR_026817       | KIF6               |
| 8126184                                                                                                              | -0,55 | -1,46 | 0,03097 | -1,22 | -2,33  | 0,05301 | NM_145027       | ---                |
| 8035579                                                                                                              | -0,55 | -1,46 | 0,00123 | -0,91 | -1,88  | 0,00487 | ---             | ---                |
| 8055680                                                                                                              | -0,55 | -1,46 | 0,49136 | -1,22 | -2,33  | 0,06150 | ---             | ERMAP              |
| 7900609                                                                                                              | -0,55 | -1,46 | 0,03280 | -0,99 | -1,99  | 0,11881 | NM_001017922    | LSM11              |
| 8109585                                                                                                              | -0,55 | -1,47 | 0,19103 | -0,29 | -1,22  | 0,31300 | NM_173491       | HTR1A              |
| 8112333                                                                                                              | -0,55 | -1,47 | 0,06216 | -0,91 | -1,88  | 0,01225 | NM_000524       | ASB18              |
| 8059868                                                                                                              | -0,55 | -1,47 | 0,27496 | -2,05 | -4,14  | 0,04203 | NM_212556       | ---                |
| 7976156                                                                                                              | -0,55 | -1,47 | 0,12257 | -1,42 | -2,68  | 0,10599 | ---             | HSD3B1             |
| 7904414                                                                                                              | -0,55 | -1,47 | 0,49686 | -0,71 | -1,64  | 0,00490 | NM_000862       | FGL1               |
| 8149521                                                                                                              | -0,55 | -1,47 | 0,02734 | 1,15  | 2,23   | 0,00606 | NM_201553       | ---                |
| 8166997                                                                                                              | -0,55 | -1,47 | 0,08856 | -0,46 | -1,38  | 0,15827 | ---             | GAS7               |
| 8012605                                                                                                              | -0,55 | -1,47 | 0,21534 | -1,91 | -3,76  | 0,00037 | NM_201433       | MTBP               |
| 8148124                                                                                                              | -0,55 | -1,47 | 0,17144 | 1,46  | 2,76   | 0,02607 | NM_022045       | MTP18              |
| 8072346                                                                                                              | -0,55 | -1,47 | 0,29841 | -0,22 | -1,17  | 0,70569 | NM_016498       | ---                |
| 7974052                                                                                                              | -0,55 | -1,47 | 0,17104 | -0,42 | -1,34  | 0,02197 | ---             | DMKN               |
| 8036079                                                                                                              | -0,55 | -1,47 | 0,05658 | 2,64  | 6,24   | 0,00025 | NM_033317       | RNF126             |
| 8032076                                                                                                              | -0,55 | -1,47 | 0,41093 | 1,72  | 3,30   | 0,03619 | NM_194460       | DKFZP779L1853      |
| 7955110                                                                                                              | -0,55 | -1,47 | 0,24239 | -0,70 | -1,62  | 0,09159 | ENST00000454785 | FOXA1              |
| 7978706                                                                                                              | -0,55 | -1,47 | 0,40059 | 2,97  | 7,83   | 0,00051 | NM_004496       | IL1RAPL1           |
| 8166593                                                                                                              | -0,55 | -1,47 | 0,11593 | -1,23 | -2,34  | 0,04504 | NM_014271       | SLC17A8            |
| 7957819                                                                                                              | -0,55 | -1,47 | 0,07552 | 0,67  | 1,59   | 0,16157 | NM_139319       | ART1               |
| 7937882                                                                                                              | -0,55 | -1,47 | 0,04718 | -0,75 | -1,68  | 0,01047 | NM_004314       | MARK2              |
| 7940798                                                                                                              | -0,55 | -1,47 | 0,10278 | 2,79  | 6,90   | 0,00003 | NM_017490       | ARHGAP15           |

|                      |       |        |         |       |       |         |                    |                 |
|----------------------|-------|--------|---------|-------|-------|---------|--------------------|-----------------|
| 8045563              | -0,55 | -1,47  | 0,33503 | -0,77 | -1,70 | 0,01267 | NM_018460          | OR9K2           |
| 7955981              | -0,55 | -1,47  | 0,11134 | -1,38 | -2,60 | 0,00187 | NM_001005243       | LOC153684       |
| 8105132              | -0,55 | -1,47  | 0,06000 | 1,22  | 2,33  | 0,00120 | AK123995 FCRL6     |                 |
| 7906475              | -0,55 | -1,47  | 0,05177 | -0,60 | -1,52 | 0,14288 | NM_001004310       | ---             |
| 8144810              | -0,55 | -1,47  | 0,37531 | -1,23 | -2,35 | 0,01613 | --- PIP5K1C        |                 |
| 8032650              | -0,55 | -1,47  | 0,10569 | -0,40 | -1,32 | 0,53910 | NM_012398          | ---             |
| 8121330              | -0,55 | -1,47  | 0,07994 | -1,15 | -2,23 | 0,01227 | --- FLJ32063       |                 |
| 8047257              | -0,55 | -1,47  | 0,19869 | -0,96 | -1,95 | 0,00174 | NR_026830          | NTRK1           |
| 7906244              | -0,55 | -1,47  | 0,08114 | -1,13 | -2,19 | 0,01895 | NM_001007792       | GBX2            |
| 8059864              | -0,55 | -1,47  | 0,29588 | -0,85 | -1,81 | 0,01790 | NM_001485          | CCL4L1          |
| 8006608              | -0,55 | -1,47  | 0,09019 | -0,87 | -1,82 | 0,00629 | NM_001001435       | PRDXDD1P        |
| 8042059              | -0,55 | -1,47  | 0,21360 | 0,55  | 1,47  | 0,00587 | NR_027258          | ---             |
| 8040417              | -0,55 | -1,47  | 0,21136 | -0,70 | -1,63 | 0,03094 | --- MFSD7          |                 |
| 8098769              | -0,55 | -1,47  | 0,13263 | -0,91 | -1,87 | 0,10775 | NM_032219          | ---             |
| 7974811              | -0,55 | -1,47  | 0,20007 | -0,26 | -1,19 | 0,06577 | --- STOML1         |                 |
| 7990273              | -0,55 | -1,47  | 0,12058 | -0,79 | -1,73 | 0,20534 | NM_004809          | ---             |
| 8146391              | -0,55 | -1,47  | 0,23613 | -0,90 | -1,86 | 0,01360 | --- CAPNS2         |                 |
| 7995712              | -0,55 | -1,47  | 0,06139 | -1,31 | -2,47 | 0,00186 | NM_032330          | PRAMEF10 //     |
| PRAMEF10 // PRAMEF10 |       |        |         |       |       |         |                    |                 |
| 7912561              | -0,55 | -1,47  | 0,25438 | -1,58 | -2,99 | 0,00207 | NM_001039361 //    | NM_001039361 // |
| NM_001039361         |       | KCNK18 |         |       |       |         |                    |                 |
| 7930833              | -0,55 | -1,47  | 0,17487 | -1,42 | -2,67 | 0,02522 | NM_181840          | C2orf27A        |
| 8045323              | -0,55 | -1,47  | 0,29979 | 0,00  | 1,00  | 0,99417 | NM_013310          | OR1E2           |
| 8011341              | -0,55 | -1,47  | 0,04695 | -1,02 | -2,03 | 0,00092 | NM_003554          | ANGPTL4         |
| 8025402              | -0,55 | -1,47  | 0,42749 | -0,14 | -1,10 | 0,46047 | NM_139314          | ---             |
| 8011328              | -0,55 | -1,47  | 0,42714 | -2,64 | -6,22 | 0,00369 | --- RNF113A        |                 |
| 8174731              | -0,55 | -1,47  | 0,09887 | -1,44 | -2,71 | 0,00179 | NM_006978          | CAPN11          |
| 8119951              | -0,55 | -1,47  | 0,04159 | -0,46 | -1,38 | 0,02262 | NM_007058          | SNORD13P1       |
| 8076415              | -0,55 | -1,47  | 0,42352 | -1,08 | -2,11 | 0,00403 | X58061 CXCR6       |                 |
| 8079377              | -0,55 | -1,47  | 0,21841 | -1,40 | -2,63 | 0,02643 | NM_006564          | KIAA0664        |
| 8011293              | -0,55 | -1,47  | 0,07915 | 2,08  | 4,23  | 0,01770 | NM_015229          | MIR29B1         |
| 8142977              | -0,56 | -1,47  | 0,05243 | -0,76 | -1,69 | 0,02264 | NR_029517          | ATAD3B          |
| 7896961              | -0,56 | -1,47  | 0,13451 | 0,28  | 1,22  | 0,42265 | NM_031921          | MOBK12B         |
| 8160521              | -0,56 | -1,47  | 0,22177 | 0,21  | 1,16  | 0,68301 | NM_024761          | CCDC13          |
| 8086434              | -0,56 | -1,47  | 0,24060 | -1,07 | -2,10 | 0,00233 | NM_144719          | OR4F6           |
| 7986530              | -0,56 | -1,47  | 0,03834 | -1,83 | -3,56 | 0,00464 | NM_001005326       | ---             |
| 8116994              | -0,56 | -1,47  | 0,42186 | -1,13 | -2,20 | 0,02174 | --- LCNL1          |                 |
| 8159531              | -0,56 | -1,47  | 0,21659 | -1,87 | -3,67 | 0,00660 | NM_207510          | LOC100132099    |
| 7969794              | -0,56 | -1,47  | 0,40523 | -1,06 | -2,09 | 0,11525 | AY358798 LOC652276 |                 |
| 7992678              | -0,56 | -1,47  | 0,44857 | -0,87 | -1,82 | 0,16425 | NR_015441          | ---             |
| 8018095              | -0,56 | -1,47  | 0,11690 | -0,90 | -1,86 | 0,01624 | --- RPS10P7        |                 |
| 7908692              | -0,56 | -1,47  | 0,12074 | -0,24 | -1,18 | 0,68182 | NR_026667          | PHLDB3          |
| 8037309              | -0,56 | -1,47  | 0,31433 | -1,07 | -2,10 | 0,02131 | NM_198850          | TDRD12          |
| 8027482              | -0,56 | -1,47  | 0,05770 | -0,18 | -1,13 | 0,18632 | NM_001110822       | ---             |
| 8013448              | -0,56 | -1,47  | 0,00966 | -0,71 | -1,64 | 0,01085 | --- THPO           |                 |
| 8092501              | -0,56 | -1,47  | 0,18160 | -1,43 | -2,69 | 0,00142 | NM_000460          | DHRS12          |
| 7971713              | -0,56 | -1,47  | 0,16660 | 0,10  | 1,07  | 0,45558 | NM_024705          | ---             |
| 7969360              | -0,56 | -1,47  | 0,13423 | -1,62 | -3,08 | 0,00070 | --- LOC100291056   |                 |
| 7981737              | -0,56 | -1,47  | 0,66401 | -2,73 | -6,62 | 0,03572 | ENST00000390631    | C16orf7         |
| 8003484              | -0,56 | -1,47  | 0,02261 | -0,26 | -1,20 | 0,29080 | NM_004913          | SNORA71A        |
| 8066258              | -0,56 | -1,47  | 0,05712 | -1,97 | -3,92 | 0,00058 | NR_002911          | SNORD8          |
| 7977732              | -0,56 | -1,47  | 0,00254 | -0,70 | -1,63 | 0,01532 | NR_002916          | ---             |
| 8115836              | -0,56 | -1,47  | 0,02059 | -1,20 | -2,31 | 0,02852 | --- ARPP21         |                 |
| 8078497              | -0,56 | -1,47  | 0,03793 | -0,63 | -1,55 | 0,09040 | NM_016300          | ANKMY1          |
| 8060103              | -0,56 | -1,47  | 0,20399 | -0,07 | -1,05 | 0,76570 | NM_016552          | PRRT2           |
| 7994647              | -0,56 | -1,47  | 0,34687 | -1,66 | -3,16 | 0,00062 | NM_145239          | LOC349196       |
| 8144416              | -0,56 | -1,47  | 0,67739 | -1,55 | -2,92 | 0,05858 | NR_027000          | LOC349196       |
| 8144418              | -0,56 | -1,47  | 0,67739 | -1,55 | -2,92 | 0,05858 | NR_027000          | LOC349196       |
| 8144490              | -0,56 | -1,47  | 0,67739 | -1,55 | -2,92 | 0,05858 | NR_027000          | LOC349196       |
| 8144492              | -0,56 | -1,47  | 0,67739 | -1,55 | -2,92 | 0,05858 | NR_027000          | MUM1L1          |
| 8169145              | -0,56 | -1,47  | 0,19363 | -0,35 | -1,27 | 0,13862 | NM_152423          | CIB3            |
| 8035110              | -0,56 | -1,47  | 0,04411 | -0,90 | -1,87 | 0,16134 | NM_054113          | CHST1           |
| 7947599              | -0,56 | -1,47  | 0,12738 | -0,48 | -1,39 | 0,11071 | NM_003654          | HBII-52-24      |
| 7982054              | -0,56 | -1,47  | 0,15079 | -0,67 | -1,59 | 0,04012 | NR_003495          | ---             |
| 8065252              | -0,56 | -1,47  | 0,22918 | -0,84 | -1,79 | 0,00153 | --- SAMSN1         |                 |
| 8069541              | -0,56 | -1,47  | 0,05732 | -1,02 | -2,03 | 0,00054 | NM_022136          | CARKD           |
| 7970084              | -0,56 | -1,47  | 0,15887 | 1,13  | 2,18  | 0,05459 | NM_018210          | C18orf34        |
| 8022831              | -0,56 | -1,47  | 0,08147 | -1,14 | -2,20 | 0,00702 | NM_001105528       | ALKBH2          |
| 7966183              | -0,56 | -1,47  | 0,01558 | 1,09  | 2,13  | 0,00675 | NM_001145374       | ---             |
| 7954690              | -0,56 | -1,47  | 0,00225 | -0,72 | -1,65 | 0,15651 | --- ANGPTL5        |                 |
| 7951195              | -0,56 | -1,47  | 0,17907 | -0,46 | -1,38 | 0,23503 | NM_178127          | HEY1            |
| 8151457              | -0,56 | -1,47  | 0,11343 | -0,27 | -1,20 | 0,65942 | NM_012258          | SEMG1           |
| 8062933              | -0,56 | -1,47  | 0,37963 | -1,33 | -2,52 | 0,06489 | NM_003007          | CYTIP           |

|         |       |       |         |       |       |         |              |              |
|---------|-------|-------|---------|-------|-------|---------|--------------|--------------|
| 8055980 | -0,56 | -1,47 | 0,15562 | -1,01 | -2,02 | 0,07133 | NM_004288    | MRC1         |
| 7926410 | -0,56 | -1,47 | 0,07896 | -0,75 | -1,68 | 0,00007 | NM_002438    | MRC1         |
| 7926451 | -0,56 | -1,47 | 0,07896 | -0,75 | -1,68 | 0,00007 | NM_002438    | ---          |
| 8016429 | -0,56 | -1,47 | 0,38126 | -1,41 | -2,65 | 0,15672 | ---          | CPSF4L       |
| 8018102 | -0,56 | -1,47 | 0,13940 | -0,74 | -1,67 | 0,00484 | NM_001129885 | ---          |
| 8094163 | -0,56 | -1,47 | 0,04748 | -0,77 | -1,71 | 0,04852 | ---          | NRBP2        |
| 8153550 | -0,56 | -1,47 | 0,21354 | 1,19  | 2,28  | 0,05787 | NM_178564    | ---          |
| 8117192 | -0,56 | -1,47 | 0,01405 | -1,33 | -2,52 | 0,03557 | ---          | ---          |
| 8026989 | -0,56 | -1,47 | 0,16810 | -1,59 | -3,01 | 0,01669 | ---          | ADAM21       |
| 7979904 | -0,56 | -1,47 | 0,08623 | 0,33  | 1,26  | 0,48149 | NM_003813    | SPTBN5       |
| 7983051 | -0,56 | -1,47 | 0,22409 | -1,16 | -2,24 | 0,00623 | NM_016642    | ---          |
| 7937957 | -0,56 | -1,47 | 0,24564 | -1,08 | -2,12 | 0,02909 | ---          | ADAM7        |
| 8145334 | -0,56 | -1,47 | 0,02898 | -0,62 | -1,54 | 0,04340 | NM_003817    | KRTAP9-8     |
| 8007130 | -0,56 | -1,47 | 0,48638 | -2,03 | -4,07 | 0,00020 | NM_031963    | FCRL2        |
| 7921298 | -0,56 | -1,47 | 0,12728 | -1,08 | -2,11 | 0,02686 | NM_030764    | UNC13D       |
| 8018449 | -0,56 | -1,47 | 0,04100 | -0,50 | -1,41 | 0,37946 | NM_199242    | ZNF423       |
| 8001337 | -0,56 | -1,47 | 0,03315 | -0,88 | -1,84 | 0,00052 | NM_015069    | ---          |
| 7973611 | -0,56 | -1,47 | 0,15241 | -0,71 | -1,64 | 0,04994 | ---          | BCAR3        |
| 7917754 | -0,56 | -1,47 | 0,06102 | 0,70  | 1,63  | 0,04662 | NM_003567    | IFT140       |
| 7998542 | -0,56 | -1,47 | 0,03029 | 0,10  | 1,07  | 0,77378 | NM_014714    | CXCR5        |
| 7944335 | -0,56 | -1,47 | 0,01925 | -1,43 | -2,70 | 0,06325 | NM_001716    | SMR3B        |
| 8095491 | -0,56 | -1,47 | 0,00429 | -0,67 | -1,59 | 0,10205 | NM_006685    | ZNF385A      |
| 7963774 | -0,56 | -1,47 | 0,02736 | -0,21 | -1,16 | 0,34298 | NM_015481    | NPVF         |
| 8138662 | -0,56 | -1,47 | 0,10059 | -0,29 | -1,23 | 0,27472 | NM_022150    | WIBG         |
| 7963965 | -0,56 | -1,47 | 0,09300 | 0,82  | 1,76  | 0,09428 | NM_032345    | PC           |
| 7949719 | -0,56 | -1,47 | 0,05048 | 1,07  | 2,11  | 0,06560 | NM_001040716 | ---          |
| 7971711 | -0,56 | -1,47 | 0,09272 | -0,78 | -1,72 | 0,08278 | ---          | TMEM120B     |
| 7959312 | -0,56 | -1,47 | 0,23598 | 2,72  | 6,59  | 0,00007 | NM_001080825 | ---          |
| 8045577 | -0,56 | -1,47 | 0,00108 | -1,20 | -2,29 | 0,00194 | ---          | GPR81        |
| 7967325 | -0,56 | -1,48 | 0,21158 | -1,66 | -3,15 | 0,00055 | NM_032554    | C1orf100     |
| 7911049 | -0,56 | -1,48 | 0,07720 | -0,92 | -1,89 | 0,02734 | NM_001012970 | BCAN         |
| 7906205 | -0,56 | -1,48 | 0,36798 | -1,08 | -2,11 | 0,00646 | NM_021948    | ---          |
| 8151492 | -0,56 | -1,48 | 0,25916 | -1,76 | -3,40 | 0,00158 | ---          | ---          |
| 8143383 | -0,56 | -1,48 | 0,18215 | -1,50 | -2,83 | 0,00634 | ---          | ---          |
| 8094686 | -0,56 | -1,48 | 0,21958 | -0,70 | -1,62 | 0,03173 | ---          | ---          |
| 7939952 | -0,56 | -1,48 | 0,00170 | -0,90 | -1,86 | 0,00517 | ---          | ZNF711       |
| 8168589 | -0,56 | -1,48 | 0,33527 | 0,03  | 1,02  | 0,92054 | NM_021998    | GPR172A      |
| 8148841 | -0,56 | -1,48 | 0,22823 | 0,43  | 1,35  | 0,42617 | NM_024531    | NEU3         |
| 7942562 | -0,56 | -1,48 | 0,07113 | 0,63  | 1,55  | 0,15336 | NM_006656    | tAKR         |
| 7931824 | -0,56 | -1,48 | 0,00499 | -0,53 | -1,45 | 0,14542 | NR_026743    | CRHBP        |
| 8106418 | -0,56 | -1,48 | 0,03591 | -1,07 | -2,10 | 0,04561 | NM_001882    | LOC100127950 |
| 8132493 | -0,56 | -1,48 | 0,25606 | -1,22 | -2,33 | 0,00160 | AK093262     | ---          |
| 7907462 | -0,56 | -1,48 | 0,01834 | -0,67 | -1,59 | 0,00879 | ---          | RSPH9        |
| 8119882 | -0,56 | -1,48 | 0,12905 | -0,67 | -1,59 | 0,04170 | NM_152732    | CCDC39       |
| 8092295 | -0,56 | -1,48 | 0,03978 | -1,01 | -2,02 | 0,05184 | NM_181426    | BCR          |
| 8071691 | -0,56 | -1,48 | 0,12083 | 0,60  | 1,51  | 0,25012 | NM_004327    | OR8A1        |
| 7944843 | -0,56 | -1,48 | 0,40536 | -1,99 | -3,99 | 0,00076 | NM_001005194 | CCDC42       |
| 8012520 | -0,56 | -1,48 | 0,08499 | -1,37 | -2,58 | 0,00450 | NM_144681    | KRTDAP       |
| 8036072 | -0,56 | -1,48 | 0,11180 | -1,29 | -2,44 | 0,00258 | NM_207392    | UNC45A       |
| 7986160 | -0,56 | -1,48 | 0,11809 | 0,57  | 1,49  | 0,42443 | NM_001039675 | POLR3GL      |
| 7919197 | -0,56 | -1,48 | 0,23126 | 0,53  | 1,44  | 0,23077 | NM_032305    | LDHC         |
| 7938788 | -0,56 | -1,48 | 0,00467 | -1,27 | -2,42 | 0,00170 | NM_002301    | ---          |
| 8048715 | -0,56 | -1,48 | 0,10748 | -0,71 | -1,64 | 0,00122 | ---          | C21orf81     |
| 8069511 | -0,56 | -1,48 | 0,08198 | 0,45  | 1,37  | 0,01253 | NR_027270    | GLYAT        |
| 7948344 | -0,56 | -1,48 | 0,04424 | -1,49 | -2,81 | 0,03188 | NM_201648    | STAP2        |
| 8032789 | -0,56 | -1,48 | 0,15817 | -0,49 | -1,40 | 0,03009 | NM_017720    | TPH2         |
| 7957205 | -0,56 | -1,48 | 0,07021 | -0,75 | -1,68 | 0,00321 | NM_173353    | RLBP1        |
| 7991246 | -0,56 | -1,48 | 0,12222 | -1,45 | -2,73 | 0,00811 | NM_000326    | ---          |
| 7929986 | -0,56 | -1,48 | 0,08169 | -1,18 | -2,27 | 0,00538 | ---          | RALYL        |
| 8147065 | -0,56 | -1,48 | 0,05923 | -0,72 | -1,64 | 0,03417 | NM_173848    | MIR492       |
| 7957608 | -0,56 | -1,48 | 0,28216 | -0,21 | -1,16 | 0,28715 | NR_030171    | ---          |
| 8101203 | -0,56 | -1,48 | 0,24595 | -0,68 | -1,60 | 0,00570 | ---          | HIST1H2AK    |
| 8124524 | -0,56 | -1,48 | 0,18369 | -0,51 | -1,42 | 0,23507 | NM_003510    | CYorf15B     |
| 8176709 | -0,56 | -1,48 | 0,05179 | -0,09 | -1,07 | 0,74179 | NM_032576    | ---          |
| 7918811 | -0,56 | -1,48 | 0,23354 | -1,27 | -2,40 | 0,04631 | ---          | ZNF366       |
| 8112584 | -0,56 | -1,48 | 0,10231 | -1,22 | -2,34 | 0,01368 | NM_152625    | TMCO2        |
| 7900409 | -0,56 | -1,48 | 0,08586 | -0,90 | -1,86 | 0,00691 | NM_001008740 | MBP          |
| 8023889 | -0,56 | -1,48 | 0,07523 | 0,28  | 1,21  | 0,30214 | NM_001025101 | ---          |
| 8124636 | -0,56 | -1,48 | 0,06361 | -0,81 | -1,76 | 0,01144 | ---          | ---          |
| 8041638 | -0,56 | -1,48 | 0,14434 | -0,71 | -1,64 | 0,00352 | ---          | GOLGA6L5     |
| 7985562 | -0,56 | -1,48 | 0,56037 | -0,56 | -1,48 | 0,08160 | NR_003246    | NLRP3        |
| 7911178 | -0,56 | -1,48 | 0,12802 | -0,88 | -1,84 | 0,00280 | NM_004895    | GYPE         |
| 8102988 | -0,56 | -1,48 | 0,06708 | -1,21 | -2,31 | 0,01057 | NM_198682    | ---          |

|         |       |       |         |       |       |         |                 |              |
|---------|-------|-------|---------|-------|-------|---------|-----------------|--------------|
| 7930452 | -0,56 | -1,48 | 0,25501 | -1,09 | -2,12 | 0,00242 | ---             | C1orf120     |
| 7907972 | -0,56 | -1,48 | 0,09075 | -0,94 | -1,92 | 0,02668 | BC140780        | ---          |
| 8116996 | -0,56 | -1,48 | 0,28846 | -0,87 | -1,83 | 0,12833 | ---             | PRAMEL       |
| 8074836 | -0,56 | -1,48 | 0,00450 | -0,64 | -1,56 | 0,08066 | AK131325        | OSBPL7       |
| 8016336 | -0,57 | -1,48 | 0,27832 | 0,36  | 1,28  | 0,24158 | NM_145798       | C6orf47      |
| 8124994 | -0,57 | -1,48 | 0,03761 | 0,16  | 1,12  | 0,85011 | NM_021184       | ABCC2        |
| 7929779 | -0,57 | -1,48 | 0,06986 | 3,11  | 8,64  | 0,00010 | NM_000392       | PLCH1        |
| 8091600 | -0,57 | -1,48 | 0,01321 | 0,53  | 1,44  | 0,15341 | NM_001130960    | ---          |
| 8102037 | -0,57 | -1,48 | 0,02002 | -0,48 | -1,40 | 0,01395 | ---             | AADACL2      |
| 8083409 | -0,57 | -1,48 | 0,03385 | -1,08 | -2,11 | 0,00011 | NM_207365       | PROM1        |
| 8099476 | -0,57 | -1,48 | 0,03524 | -0,82 | -1,77 | 0,00824 | NM_006017       | ---          |
| 8015944 | -0,57 | -1,48 | 0,33739 | -1,88 | -3,68 | 0,00365 | ---             | ---          |
| 7986627 | -0,57 | -1,48 | 0,06072 | -1,07 | -2,10 | 0,02091 | ---             | ---          |
| 7976724 | -0,57 | -1,48 | 0,13191 | -0,67 | -1,59 | 0,02234 | ---             | TRIM22       |
| 7938057 | -0,57 | -1,48 | 0,32108 | -1,60 | -3,03 | 0,01509 | AK308796        | C21orf29     |
| 8070757 | -0,57 | -1,48 | 0,32994 | -1,77 | -3,41 | 0,00219 | NM_144991       | C2orf14      |
| 8055214 | -0,57 | -1,48 | 0,26205 | -1,86 | -3,63 | 0,00956 | NR_023391       | ---          |
| 7932067 | -0,57 | -1,48 | 0,15523 | -1,12 | -2,18 | 0,02499 | ---             | TSPAN11      |
| 7954645 | -0,57 | -1,48 | 0,14620 | -0,58 | -1,49 | 0,07330 | NM_001080509    | CRELD2       |
| 8073949 | -0,57 | -1,48 | 0,20541 | 0,59  | 1,50  | 0,12531 | NM_001135101    | MIR144       |
| 8013786 | -0,57 | -1,48 | 0,06956 | -0,76 | -1,70 | 0,00962 | NR_029685       | OR4X2        |
| 7939867 | -0,57 | -1,48 | 0,18217 | -1,19 | -2,28 | 0,00098 | NM_001004727    | HPN          |
| 8027728 | -0,57 | -1,48 | 0,03438 | -1,56 | -2,96 | 0,00196 | NM_182983       | ---          |
| 7972237 | -0,57 | -1,48 | 0,22878 | -0,88 | -1,84 | 0,00025 | ---             | ---          |
| 7897424 | -0,57 | -1,48 | 0,11404 | -0,60 | -1,52 | 0,05243 | ---             | FLJ45831     |
| 8012893 | -0,57 | -1,48 | 0,44019 | -1,20 | -2,29 | 0,01148 | AK127731        | C7orf52      |
| 8141669 | -0,57 | -1,48 | 0,06048 | -0,18 | -1,13 | 0,04944 | NM_198571       | C17orf108    |
| 8013567 | -0,57 | -1,48 | 0,57878 | -0,10 | -1,07 | 0,84458 | NM_001076680    | LOC285696    |
| 8111203 | -0,57 | -1,48 | 0,20061 | -0,06 | -1,04 | 0,83369 | NR_027253       | ANGPTL3      |
| 7901883 | -0,57 | -1,48 | 0,11219 | -0,43 | -1,35 | 0,11583 | NM_014495       | ZP4          |
| 7925419 | -0,57 | -1,48 | 0,20467 | -1,21 | -2,31 | 0,00426 | NM_021186       | ---          |
| 7936902 | -0,57 | -1,48 | 0,08238 | -0,76 | -1,69 | 0,00007 | ---             | ---          |
| 8175440 | -0,57 | -1,48 | 0,07564 | -1,01 | -2,02 | 0,00067 | ---             | ---          |
| 8163015 | -0,57 | -1,48 | 0,36596 | -1,15 | -2,23 | 0,08265 | ---             | MIRLET7D     |
| 8156523 | -0,57 | -1,48 | 0,14689 | -1,32 | -2,49 | 0,00243 | NR_029481       | LOC388152    |
| 7985402 | -0,57 | -1,48 | 0,00218 | -0,03 | -1,02 | 0,96229 | NR_027001       | ROCK1P1      |
| 8019804 | -0,57 | -1,48 | 0,56676 | -2,35 | -5,11 | 0,01076 | BC041849        | FLJ42280     |
| 8141127 | -0,57 | -1,48 | 0,04935 | -1,07 | -2,10 | 0,00069 | ENST00000356686 | ---          |
| 7955462 | -0,57 | -1,48 | 0,15889 | -0,86 | -1,81 | 0,01221 | ---             | ---          |
| 8083775 | -0,57 | -1,48 | 0,15642 | -1,05 | -2,07 | 0,13935 | ---             | APOBEC3A     |
| 8073056 | -0,57 | -1,48 | 0,01202 | -1,39 | -2,62 | 0,02914 | NM_145699       | ---          |
| 8045812 | -0,57 | -1,48 | 0,17349 | -0,40 | -1,32 | 0,07034 | ---             | FAM18A       |
| 7999412 | -0,57 | -1,48 | 0,20815 | -0,74 | -1,67 | 0,06898 | NM_001079512    | ---          |
| 8119490 | -0,57 | -1,48 | 0,00978 | -0,60 | -1,52 | 0,02532 | ---             | CCDC144NL    |
| 8013479 | -0,57 | -1,48 | 0,40996 | -0,57 | -1,49 | 0,32474 | NM_001004306    | DGCR14       |
| 8074371 | -0,57 | -1,48 | 0,21556 | -0,13 | -1,09 | 0,76755 | NM_022719       | ---          |
| 8005433 | -0,57 | -1,48 | 0,32592 | -0,53 | -1,44 | 0,18220 | ---             | CHRM5        |
| 7982497 | -0,57 | -1,48 | 0,11806 | -0,25 | -1,19 | 0,45678 | NM_012125       | ABRA         |
| 8152291 | -0,57 | -1,48 | 0,42013 | -1,54 | -2,91 | 0,00047 | NM_139166       | LOC440300    |
| 7985690 | -0,57 | -1,48 | 0,23802 | -1,20 | -2,30 | 0,02599 | BX648930        | OR6A2        |
| 7946280 | -0,57 | -1,48 | 0,21010 | -0,77 | -1,71 | 0,14696 | NM_003696       | SLC13A2      |
| 8005879 | -0,57 | -1,48 | 0,33168 | -1,08 | -2,11 | 0,03314 | NR_027384       | ---          |
| 8152367 | -0,57 | -1,48 | 0,18508 | -0,96 | -1,95 | 0,01007 | ---             | ---          |
| 8148692 | -0,57 | -1,48 | 0,11381 | -0,68 | -1,60 | 0,08380 | ---             | ---          |
| 7996256 | -0,57 | -1,48 | 0,38346 | -0,65 | -1,56 | 0,34114 | ---             | C21orf130    |
| 8068664 | -0,57 | -1,48 | 0,14767 | -0,84 | -1,79 | 0,00185 | ENST00000433522 | KBTBD13      |
| 7984253 | -0,57 | -1,48 | 0,00411 | -1,35 | -2,56 | 0,00691 | NM_001101362    | ---          |
| 7931027 | -0,57 | -1,48 | 0,16619 | -0,40 | -1,32 | 0,06275 | ---             | EREG         |
| 8095728 | -0,57 | -1,48 | 0,04981 | 2,07  | 4,19  | 0,00452 | NM_001432       | TDH          |
| 8144604 | -0,57 | -1,48 | 0,12200 | -0,81 | -1,75 | 0,05863 | NR_001578       | OR9I1        |
| 7948310 | -0,57 | -1,48 | 0,30606 | -1,20 | -2,30 | 0,00304 | NM_001005211    | PHRF1        |
| 7937415 | -0,57 | -1,48 | 0,13325 | -0,38 | -1,30 | 0,23390 | NM_020901       | MUCL1        |
| 7955963 | -0,57 | -1,48 | 0,38386 | -1,20 | -2,29 | 0,00034 | NM_058173       | ---          |
| 7967698 | -0,57 | -1,48 | 0,45716 | -1,50 | -2,82 | 0,07269 | ---             | CASQ1        |
| 7906552 | -0,57 | -1,48 | 0,18751 | -0,25 | -1,19 | 0,18013 | NM_001231       | MREG         |
| 8058824 | -0,57 | -1,48 | 0,12175 | 0,05  | 1,04  | 0,87848 | NM_018000       | CYP19A1      |
| 7988767 | -0,57 | -1,48 | 0,20742 | -1,05 | -2,06 | 0,03593 | NM_031226       | LY6G6E       |
| 8125038 | -0,57 | -1,48 | 0,21365 | -0,26 | -1,20 | 0,70352 | NR_003673       | LY6G6E       |
| 8178582 | -0,57 | -1,48 | 0,21365 | -0,26 | -1,20 | 0,70352 | NR_003673       | LY6G6E       |
| 8179810 | -0,57 | -1,48 | 0,21365 | -0,26 | -1,20 | 0,70352 | NR_003673       | LOC100131763 |
| 8049950 | -0,57 | -1,48 | 0,27465 | -1,36 | -2,56 | 0,00535 | AK094921        | FLJ42289     |
| 7991542 | -0,57 | -1,48 | 0,26113 | -0,58 | -1,49 | 0,03144 | NR_028139       | KCNAB1       |
| 8083546 | -0,57 | -1,48 | 0,00204 | -0,77 | -1,71 | 0,05731 | NM_003471       | FAM131B      |

|         |       |       |         |       |        |         |                 |             |
|---------|-------|-------|---------|-------|--------|---------|-----------------|-------------|
| 8143564 | -0,57 | -1,48 | 0,22737 | -1,57 | -2,98  | 0,00032 | NM_001031690    | ABCC8       |
| 7946860 | -0,57 | -1,48 | 0,00842 | -0,62 | -1,54  | 0,01404 | NM_000352       | ---         |
| 7934297 | -0,57 | -1,48 | 0,03762 | -1,27 | -2,41  | 0,01769 | ---             | RASIP1      |
| 8038163 | -0,57 | -1,48 | 0,10471 | -1,22 | -2,33  | 0,00248 | NM_017805       | SNORD115-42 |
| 7982090 | -0,57 | -1,48 | 0,45232 | -1,77 | -3,41  | 0,00002 | NR_003357       | TEP1        |
| 7977511 | -0,57 | -1,48 | 0,20316 | 0,41  | 1,33   | 0,15506 | NM_007110       | GRASP       |
| 7955578 | -0,57 | -1,48 | 0,31128 | -1,30 | -2,45  | 0,04138 | NM_181711       | ---         |
| 8022100 | -0,57 | -1,48 | 0,28584 | -0,69 | -1,61  | 0,12759 | ---             | USP43       |
| 8004905 | -0,57 | -1,48 | 0,15288 | -0,19 | -1,14  | 0,28200 | NM_153210       | GOLGA8C     |
| 7981752 | -0,57 | -1,48 | 0,21885 | -0,40 | -1,32  | 0,33186 | NR_027411       | SERPINB3    |
| 8023696 | -0,57 | -1,48 | 0,12138 | -0,93 | -1,90  | 0,14570 | NM_006919       | C20orf185   |
| 8061815 | -0,57 | -1,48 | 0,16667 | -1,28 | -2,43  | 0,00631 | NM_182658       | C2orf78     |
| 8042769 | -0,57 | -1,49 | 0,02262 | -0,74 | -1,67  | 0,19425 | NM_001080474    | TNNC1       |
| 8087925 | -0,57 | -1,49 | 0,14771 | 0,11  | 1,08   | 0,62202 | NM_003280       | SHISA7      |
| 8039498 | -0,57 | -1,49 | 0,11094 | 0,35  | 1,28   | 0,17199 | NM_001145176    | LOC728437   |
| 7970806 | -0,57 | -1,49 | 0,06778 | -1,64 | -3,12  | 0,00117 | BC027486        | ---         |
| 8113431 | -0,57 | -1,49 | 0,04704 | -0,22 | -1,17  | 0,02937 | ---             | PLCXD1      |
| 8165711 | -0,57 | -1,49 | 0,30853 | -0,14 | -1,10  | 0,58057 | NM_018390       | KLHL33      |
| 7977567 | -0,57 | -1,49 | 0,22233 | -1,31 | -2,47  | 0,13934 | NM_001109997    | ---         |
| 7925790 | -0,57 | -1,49 | 0,05732 | -1,02 | -2,02  | 0,00398 | ---             | DNAH12      |
| 8088322 | -0,57 | -1,49 | 0,02282 | -0,78 | -1,72  | 0,09266 | NM_198564       | TMC2        |
| 8060461 | -0,57 | -1,49 | 0,27648 | -0,85 | -1,81  | 0,03504 | NM_080751       | PLCXD1      |
| 8176286 | -0,57 | -1,49 | 0,32250 | -0,08 | -1,06  | 0,72492 | NM_018390       | MUC21       |
| 8118069 | -0,57 | -1,49 | 0,40312 | -1,67 | -3,18  | 0,00001 | NM_001010909    | PRAMEF2     |
| 7897987 | -0,57 | -1,49 | 0,25032 | -0,48 | -1,40  | 0,08706 | NM_023014       | ---         |
| 8173501 | -0,57 | -1,49 | 0,05598 | -0,77 | -1,71  | 0,00608 | ---             | CD247       |
| 7922040 | -0,57 | -1,49 | 0,04456 | -1,24 | -2,36  | 0,01302 | NM_198053       | RHOXF1      |
| 8174755 | -0,57 | -1,49 | 0,05950 | -0,82 | -1,77  | 0,00732 | NM_139282       | SERPINA6    |
| 7981059 | -0,57 | -1,49 | 0,14010 | -0,97 | -1,96  | 0,00569 | NM_001756       | ERVFRDE1    |
| 8123929 | -0,57 | -1,49 | 0,19772 | -2,22 | -4,66  | 0,00382 | NM_207582       | ---         |
| 8103204 | -0,57 | -1,49 | 0,14272 | -0,31 | -1,24  | 0,20535 | ---             | SNRNP35     |
| 7959586 | -0,57 | -1,49 | 0,00103 | -0,15 | -1,11  | 0,42861 | NM_022717       | SRXN1       |
| 8064382 | -0,57 | -1,49 | 0,44445 | -1,28 | -2,44  | 0,03095 | AK125343        | ---         |
| 8078688 | -0,57 | -1,49 | 0,17132 | -1,07 | -2,10  | 0,36456 | ---             | MUSK        |
| 8157173 | -0,57 | -1,49 | 0,17464 | -1,46 | -2,75  | 0,00202 | NM_005592       | HERC2       |
| 7986863 | -0,57 | -1,49 | 0,12594 | 2,06  | 4,17   | 0,00096 | NM_004667       | TCEA2       |
| 8064245 | -0,57 | -1,49 | 0,14293 | 2,23  | 4,69   | 0,01704 | NM_198723       | IDUA        |
| 8093425 | -0,57 | -1,49 | 0,06116 | 0,66  | 1,58   | 0,18365 | NM_000203       | SIGLEC11    |
| 8038505 | -0,57 | -1,49 | 0,03891 | -0,55 | -1,46  | 0,00519 | NM_052884       | ---         |
| 8121363 | -0,57 | -1,49 | 0,20211 | -1,09 | -2,12  | 0,00887 | ---             | ---         |
| 8029435 | -0,57 | -1,49 | 0,18059 | -2,07 | -4,20  | 0,00391 | ---             | KCNV2       |
| 8154124 | -0,57 | -1,49 | 0,25521 | -1,53 | -2,89  | 0,00298 | NM_133497       | HOXB6       |
| 8016463 | -0,57 | -1,49 | 0,18234 | 0,80  | 1,74   | 0,08085 | NM_018952       | PBX4        |
| 8035694 | -0,57 | -1,49 | 0,30340 | 0,10  | 1,07   | 0,60969 | NM_025245       | TNP1        |
| 8058866 | -0,57 | -1,49 | 0,01440 | -0,91 | -1,87  | 0,01941 | NM_003284       | RG9MTD3     |
| 8155301 | -0,57 | -1,49 | 0,10737 | -0,22 | -1,16  | 0,52070 | NM_144964       | WDR17       |
| 8098379 | -0,57 | -1,49 | 0,03461 | 1,83  | 3,55   | 0,00345 | NM_170710       | ZNF358      |
| 8025179 | -0,57 | -1,49 | 0,03465 | 0,91  | 1,89   | 0,00723 | NM_018083       | FAM198A     |
| 8079131 | -0,57 | -1,49 | 0,12013 | -0,65 | -1,56  | 0,02934 | NM_001129908    | KRTAP4-12   |
| 8015230 | -0,57 | -1,49 | 0,72976 | -4,05 | -16,60 | 0,00065 | NM_031854       | ---         |
| 7945997 | -0,57 | -1,49 | 0,11816 | -1,31 | -2,48  | 0,08172 | ---             | TRBV23OR9-2 |
| 8154841 | -0,57 | -1,49 | 0,06168 | -0,65 | -1,57  | 0,29372 | ENST00000390389 | ---         |
| 8040616 | -0,57 | -1,49 | 0,06284 | -0,77 | -1,70  | 0,04107 | ---             | ---         |
| 8086218 | -0,57 | -1,49 | 0,16553 | -0,59 | -1,51  | 0,00094 | ---             | ITPK1       |
| 7980970 | -0,57 | -1,49 | 0,37941 | 1,85  | 3,60   | 0,01266 | NM_014216       | AKR1C4      |
| 7925939 | -0,57 | -1,49 | 0,08434 | -0,74 | -1,68  | 0,17837 | NM_001818       | CMYA5       |
| 8106556 | -0,57 | -1,49 | 0,11562 | -0,81 | -1,75  | 0,01145 | NM_153610       | GPR3        |
| 7899343 | -0,57 | -1,49 | 0,35104 | -0,01 | -1,00  | 0,99209 | NM_005281       | CDKN2A      |
| 8160441 | -0,57 | -1,49 | 0,20996 | -0,04 | -1,03  | 0,95682 | NM_058197       | NUDT9P1     |
| 7934993 | -0,57 | -1,49 | 0,27125 | -1,03 | -2,05  | 0,01353 | NR_002779       | FAM169A     |
| 8112649 | -0,57 | -1,49 | 0,00683 | 2,90  | 7,44   | 0,00197 | NM_015566       | TBL3        |
| 7992414 | -0,57 | -1,49 | 0,29298 | 0,70  | 1,62   | 0,05219 | NM_006453       | FLJ90680    |
| 8075846 | -0,57 | -1,49 | 0,02528 | -1,14 | -2,20  | 0,00721 | AK075161        | ITGAE       |
| 8011430 | -0,57 | -1,49 | 0,02799 | -0,50 | -1,41  | 0,02064 | NM_002208       | ---         |
| 7963348 | -0,58 | -1,49 | 0,12883 | -1,22 | -2,33  | 0,01783 | ---             | RLTPR       |
| 7996608 | -0,58 | -1,49 | 0,18484 | -0,57 | -1,48  | 0,12879 | NM_001013838    | ---         |
| 8138795 | -0,58 | -1,49 | 0,00039 | -1,20 | -2,29  | 0,03242 | ---             | ---         |
| 8092275 | -0,58 | -1,49 | 0,26102 | -1,50 | -2,82  | 0,02429 | ---             | FAM168A     |
| 7950271 | -0,58 | -1,49 | 0,22268 | 0,66  | 1,58   | 0,01123 | EF363480        | ELF3        |
| 7908793 | -0,58 | -1,49 | 0,03176 | 2,07  | 4,20   | 0,00122 | NM_001114309    | UBTFL1      |
| 7943047 | -0,58 | -1,49 | 0,29288 | -1,33 | -2,51  | 0,00985 | NM_001143975    | UBTFL1      |
| 7950951 | -0,58 | -1,49 | 0,29288 | -1,33 | -2,51  | 0,00985 | NM_001143975    | UBTFL1      |
| 8043581 | -0,58 | -1,49 | 0,29288 | -1,33 | -2,51  | 0,00985 | NM_001143975    | UBTFL1      |

|         |       |       |         |       |       |         |                  |              |
|---------|-------|-------|---------|-------|-------|---------|------------------|--------------|
| 8053785 | -0,58 | -1,49 | 0,29288 | -1,33 | -2,51 | 0,00985 | NM_001143975     | SH2D4B       |
| 7928723 | -0,58 | -1,49 | 0,23172 | -0,84 | -1,79 | 0,05564 | NM_207372        | KRTAP26-1    |
| 8069804 | -0,58 | -1,49 | 0,14925 | -1,20 | -2,30 | 0,00147 | NM_203405        | TEX14        |
| 8017061 | -0,58 | -1,49 | 0,04914 | -0,40 | -1,32 | 0,03434 | NM_198393        | FRMD5        |
| 7988260 | -0,58 | -1,49 | 0,11609 | 2,23  | 4,71  | 0,00448 | NM_032892        | IGHV1OR15-5  |
| 8067822 | -0,58 | -1,49 | 0,24434 | -1,26 | -2,39 | 0,02825 | ENST00000302092  | LOC643923    |
| 7943573 | -0,58 | -1,49 | 0,00650 | -0,15 | -1,11 | 0,68966 | ENST00000299326  | PATE1        |
| 7945033 | -0,58 | -1,49 | 0,30083 | -0,70 | -1,63 | 0,02540 | NM_138294        | SEL1L2       |
| 8065045 | -0,58 | -1,49 | 0,18190 | -0,77 | -1,70 | 0,07065 | NM_025229        | BTBD11       |
| 7958352 | -0,58 | -1,49 | 0,07011 | 0,85  | 1,81  | 0,02720 | NM_001018072     | C10orf32     |
| 7930170 | -0,58 | -1,49 | 0,07798 | 0,38  | 1,31  | 0,13498 | NM_001136200     | FOSB         |
| 8029693 | -0,58 | -1,49 | 0,10636 | -1,49 | -2,80 | 0,00372 | NM_006732        | RPL23AP71    |
| 7973894 | -0,58 | -1,49 | 0,13405 | -0,94 | -1,92 | 0,07169 | CR595167 SPAG8   |              |
| 8161133 | -0,58 | -1,49 | 0,03760 | -1,13 | -2,19 | 0,11597 | NM_172312        | HIST1H2BI    |
| 8117429 | -0,58 | -1,49 | 0,05691 | -1,09 | -2,13 | 0,07964 | NM_003525        | RSPO1        |
| 7915032 | -0,58 | -1,49 | 0,07501 | -0,38 | -1,30 | 0,15826 | NM_001038633     | ---          |
| 8107162 | -0,58 | -1,49 | 0,13221 | -0,58 | -1,50 | 0,05968 | --- CLEC4C       | ---          |
| 7960832 | -0,58 | -1,49 | 0,05215 | -0,50 | -1,42 | 0,07056 | NM_130441        | ---          |
| 8144740 | -0,58 | -1,49 | 0,17821 | -0,79 | -1,72 | 0,03697 | ---              | ---          |
| 8040413 | -0,58 | -1,49 | 0,00392 | -0,87 | -1,82 | 0,00066 | --- AKNA         | ---          |
| 8163569 | -0,58 | -1,49 | 0,05918 | 0,78  | 1,72  | 0,17919 | NM_030767        | PDCD7        |
| 7989725 | -0,58 | -1,49 | 0,01312 | 1,52  | 2,88  | 0,05152 | NM_005707        | ---          |
| 7983841 | -0,58 | -1,49 | 0,01093 | -0,85 | -1,80 | 0,05113 | ---              | ---          |
| 7966343 | -0,58 | -1,49 | 0,11638 | -0,80 | -1,74 | 0,04804 | --- ASF1B        | ---          |
| 8034772 | -0,58 | -1,49 | 0,00372 | 2,45  | 5,47  | 0,00050 | NM_018154        | FSIP1        |
| 7987426 | -0,58 | -1,49 | 0,03032 | -1,10 | -2,15 | 0,01787 | NM_152597        | ---          |
| 8116846 | -0,58 | -1,49 | 0,28905 | -1,44 | -2,72 | 0,00032 | --- DCST1        | ---          |
| 7905862 | -0,58 | -1,49 | 0,11550 | -1,70 | -3,26 | 0,02393 | NM_152494        | ---          |
| 8132343 | -0,58 | -1,49 | 0,02764 | -0,63 | -1,54 | 0,03519 | --- HMGB3        | ---          |
| 8170468 | -0,58 | -1,49 | 0,16762 | 0,62  | 1,54  | 0,16807 | NM_005342        | DKFZP434L187 |
| 7982252 | -0,58 | -1,49 | 0,28257 | -1,24 | -2,36 | 0,02345 | NR_026771        | LOC149134    |
| 7911170 | -0,58 | -1,49 | 0,10155 | -1,05 | -2,08 | 0,03764 | NR_015422        | ---          |
| 7969977 | -0,58 | -1,49 | 0,34061 | 0,04  | 1,03  | 0,90827 | --- TPSG1        | ---          |
| 7998427 | -0,58 | -1,49 | 0,35550 | -1,01 | -2,01 | 0,06003 | NM_012467        | ---          |
| 7945952 | -0,58 | -1,49 | 0,22329 | -0,95 | -1,93 | 0,01346 | --- LRCH4        | ---          |
| 8141535 | -0,58 | -1,49 | 0,05111 | 0,05  | 1,03  | 0,89261 | NM_002319        | GRWD1        |
| 8030035 | -0,58 | -1,49 | 0,18536 | 0,11  | 1,08  | 0,86981 | NM_031485        | PNRC1        |
| 8121076 | -0,58 | -1,49 | 0,01767 | -0,69 | -1,61 | 0,18090 | NM_006813        | RN7SL1       |
| 8040338 | -0,58 | -1,49 | 0,24612 | -1,86 | -3,63 | 0,02868 | NR_002715        | ---          |
| 8176679 | -0,58 | -1,49 | 0,11875 | -1,14 | -2,20 | 0,01099 | ---              | ---          |
| 8177212 | -0,58 | -1,49 | 0,11875 | -1,14 | -2,20 | 0,01099 | --- CD226        | ---          |
| 8023757 | -0,58 | -1,49 | 0,24680 | -0,83 | -1,78 | 0,10973 | NM_006566        | ZFP42        |
| 8098690 | -0,58 | -1,49 | 0,10872 | 2,13  | 4,38  | 0,00082 | NM_174900        | RGN          |
| 8167027 | -0,58 | -1,49 | 0,28403 | -0,39 | -1,31 | 0,25889 | NM_152869        | ---          |
| 8028283 | -0,58 | -1,49 | 0,11410 | -1,23 | -2,34 | 0,00000 | ---              | ---          |
| 7987534 | -0,58 | -1,49 | 0,03816 | -0,84 | -1,79 | 0,09275 | --- LOC100131497 | ---          |
| 7980481 | -0,58 | -1,49 | 0,19252 | -0,38 | -1,30 | 0,13035 | BX248745 NXF4    | ---          |
| 8168940 | -0,58 | -1,49 | 0,16224 | -0,69 | -1,61 | 0,00037 | NR_002216        | HSFX1        |
| 8170402 | -0,58 | -1,49 | 0,21954 | -0,95 | -1,93 | 0,04238 | NM_016153        | HSFX1        |
| 8175616 | -0,58 | -1,49 | 0,21954 | -0,95 | -1,93 | 0,04238 | NM_016153        | ---          |
| 8004946 | -0,58 | -1,49 | 0,11612 | -0,54 | -1,45 | 0,18579 | --- CTAGE4       | ---          |
| 8129560 | -0,58 | -1,50 | 0,21456 | -0,30 | -1,23 | 0,13489 | NM_198495        | GRIN3B       |
| 8024100 | -0,58 | -1,50 | 0,21373 | -0,57 | -1,49 | 0,20018 | NM_138690        | RIBC2        |
| 8073766 | -0,58 | -1,50 | 0,22849 | 0,69  | 1,62  | 0,01648 | NM_015653        | LRRC52       |
| 7906973 | -0,58 | -1,50 | 0,01922 | -1,68 | -3,21 | 0,01048 | NM_001005214     | ---          |
| 8088337 | -0,58 | -1,50 | 0,16606 | -0,37 | -1,29 | 0,01119 | ---              | ---          |
| 7932211 | -0,58 | -1,50 | 0,40143 | -2,05 | -4,13 | 0,00942 | --- PCDHB15      | ---          |
| 8108753 | -0,58 | -1,50 | 0,04721 | -0,22 | -1,17 | 0,57347 | NM_018935        | KCNJ1        |
| 7952617 | -0,58 | -1,50 | 0,27366 | -1,28 | -2,43 | 0,01530 | NM_153767        | CNBD1        |
| 8147194 | -0,58 | -1,50 | 0,01705 | -1,19 | -2,28 | 0,03171 | NM_173538        | GNAO1        |
| 7995739 | -0,58 | -1,50 | 0,02740 | 0,41  | 1,32  | 0,16041 | NM_020988        | ZNF487       |
| 7927169 | -0,58 | -1,50 | 0,44553 | -0,85 | -1,80 | 0,04053 | NR_026693        | SLC9A3R1     |
| 8009685 | -0,58 | -1,50 | 0,22106 | 1,31  | 2,48  | 0,05714 | NM_004252        | DNASE1       |
| 7992934 | -0,58 | -1,50 | 0,00091 | 0,19  | 1,14  | 0,28213 | NM_005223        | C8orf33      |
| 8148955 | -0,58 | -1,50 | 0,33643 | 2,02  | 4,05  | 0,00246 | NM_023080        | TMEM74       |
| 8152335 | -0,58 | -1,50 | 0,03538 | 1,31  | 2,47  | 0,00683 | NM_153015        | RAB38        |
| 7950899 | -0,58 | -1,50 | 0,03893 | 2,79  | 6,93  | 0,00002 | NM_022337        | C9orf93      |
| 8154416 | -0,58 | -1,50 | 0,04843 | -0,45 | -1,36 | 0,40325 | AY422473 SIDT1   | ---          |
| 8081710 | -0,58 | -1,50 | 0,13663 | -1,76 | -3,39 | 0,00748 | NM_017699        | ERMN         |
| 8055969 | -0,58 | -1,50 | 0,16160 | -0,56 | -1,47 | 0,01570 | NM_001009959     | CCL26        |
| 8140358 | -0,58 | -1,50 | 0,18727 | -1,02 | -2,03 | 0,00206 | NM_006072        | ---          |
| 8105577 | -0,58 | -1,50 | 0,09815 | -0,84 | -1,79 | 0,06641 | --- IL3RA        | ---          |
| 8165752 | -0,58 | -1,50 | 0,13398 | -1,09 | -2,13 | 0,00986 | NM_002183        | IL3RA        |



|         |       |       |         |       |       |         |                   |              |
|---------|-------|-------|---------|-------|-------|---------|-------------------|--------------|
| 8176323 | -0,58 | -1,50 | 0,13398 | -1,09 | -2,13 | 0,00986 | NM_002183         | MYRIP        |
| 8078933 | -0,58 | -1,50 | 0,00466 | -0,96 | -1,95 | 0,02070 | NM_015460         | FASN         |
| 8019392 | -0,58 | -1,50 | 0,00589 | 1,95  | 3,86  | 0,01304 | NM_004104         | IRF2BP2      |
| 7925161 | -0,58 | -1,50 | 0,02457 | 0,21  | 1,16  | 0,66060 | NM_182972         | CXCL10       |
| 8101126 | -0,58 | -1,50 | 0,06393 | -0,57 | -1,49 | 0,01308 | NM_001565         | GNMT         |
| 8119620 | -0,58 | -1,50 | 0,15848 | -0,84 | -1,79 | 0,05003 | NM_018960         | C6orf64      |
| 8126147 | -0,58 | -1,50 | 0,26705 | 0,77  | 1,70  | 0,08799 | BC022007 CDCP2    |              |
| 7916384 | -0,58 | -1,50 | 0,34508 | -0,66 | -1,58 | 0,04842 | NM_201546         | LUC7L        |
| 7998174 | -0,58 | -1,50 | 0,09871 | 0,00  | 1,00  | 0,99419 | NM_018032         | LRRC63       |
| 7968962 | -0,58 | -1,50 | 0,14953 | -0,37 | -1,30 | 0,48024 | ENST00000446175   | PTPN6        |
| 7953569 | -0,58 | -1,50 | 0,11553 | 2,57  | 5,93  | 0,00027 | NM_080549         | MYO18A       |
| 8013860 | -0,58 | -1,50 | 0,05275 | 0,69  | 1,61  | 0,08231 | NM_078471         | DIP2A        |
| 8069399 | -0,58 | -1,50 | 0,30266 | 1,44  | 2,71  | 0,01284 | NM_015151         | OR4A13P      |
| 7939920 | -0,58 | -1,50 | 0,18409 | -1,05 | -2,07 | 0,00041 | ENST00000314689   | NCF1         |
| 8133518 | -0,58 | -1,50 | 0,01679 | -1,23 | -2,35 | 0,00254 | NM_000265         | C1orf114     |
| 7922152 | -0,58 | -1,50 | 0,07968 | -1,43 | -2,69 | 0,00003 | BC026073 ---      |              |
| 7934777 | -0,58 | -1,50 | 0,00674 | -0,62 | -1,54 | 0,00216 | --- SLC5A1        |              |
| 8072587 | -0,58 | -1,50 | 0,19796 | -0,92 | -1,89 | 0,00248 | NM_000343         | TPM1         |
| 7989491 | -0,58 | -1,50 | 0,08879 | -1,73 | -3,31 | 0,00111 | AB209041 SNORD32B |              |
| 8117746 | -0,58 | -1,50 | 0,00396 | -0,95 | -1,93 | 0,09766 | NR_003049         | SAMD14       |
| 8016615 | -0,58 | -1,50 | 0,12440 | -1,12 | -2,18 | 0,18586 | NM_174920         | MIR376C      |
| 7976838 | -0,58 | -1,50 | 0,05665 | -0,70 | -1,62 | 0,03904 | NR_029861         | SPINK4       |
| 8154779 | -0,58 | -1,50 | 0,04064 | -1,01 | -2,01 | 0,02324 | NM_014471         | COL8A2       |
| 7914880 | -0,58 | -1,50 | 0,48083 | -1,53 | -2,88 | 0,00074 | NM_005202         | ---          |
| 7944791 | -0,58 | -1,50 | 0,11692 | -0,28 | -1,21 | 0,44358 | --- OR10S1        |              |
| 7952384 | -0,58 | -1,50 | 0,39588 | -0,85 | -1,81 | 0,19484 | NM_001004474      | SHC2         |
| 8032037 | -0,58 | -1,50 | 0,12105 | -1,54 | -2,92 | 0,00090 | NM_012435         | SLC9A10      |
| 8089489 | -0,58 | -1,50 | 0,15228 | -1,29 | -2,44 | 0,04726 | NM_183061         | CCDC74A      |
| 8045309 | -0,58 | -1,50 | 0,02385 | -1,03 | -2,04 | 0,03718 | NM_138770         | LOC128102    |
| 7904429 | -0,58 | -1,50 | 0,52756 | -2,11 | -4,31 | 0,02664 | AF252254 ---      |              |
| 8015906 | -0,58 | -1,50 | 0,40287 | -0,71 | -1,63 | 0,03855 | --- CORO2A        |              |
| 8162744 | -0,58 | -1,50 | 0,04294 | 2,08  | 4,23  | 0,00132 | NM_003389         | FASLG        |
| 7907430 | -0,58 | -1,50 | 0,24167 | -1,65 | -3,13 | 0,00017 | NM_000639         | ---          |
| 8019081 | -0,58 | -1,50 | 0,17311 | -1,16 | -2,24 | 0,12284 | --- LIMD1         |              |
| 8079334 | -0,58 | -1,50 | 0,14688 | 0,66  | 1,58  | 0,47680 | NM_014240         | POU6F2       |
| 8132387 | -0,58 | -1,50 | 0,24238 | -1,49 | -2,82 | 0,00022 | NM_007252         | LOC729040    |
| 8113071 | -0,58 | -1,50 | 0,11992 | -2,23 | -4,68 | 0,00041 | ENST00000440769   | CCR2         |
| 8079392 | -0,58 | -1,50 | 0,00448 | -1,00 | -2,00 | 0,05052 | NM_001123396      | ---          |
| 8081405 | -0,58 | -1,50 | 0,01865 | -0,63 | -1,55 | 0,00492 | --- ---           |              |
| 8127991 | -0,58 | -1,50 | 0,12557 | -1,00 | -2,00 | 0,00461 | --- OR51G1        |              |
| 7946013 | -0,58 | -1,50 | 0,37201 | -0,58 | -1,49 | 0,07637 | NM_001005237      | YY2          |
| 8166398 | -0,59 | -1,50 | 0,21861 | -0,35 | -1,28 | 0,30710 | NM_206923         | LAT          |
| 7994541 | -0,59 | -1,50 | 0,10612 | -0,53 | -1,44 | 0,18992 | NM_014387         | SLC27A4      |
| 8158224 | -0,59 | -1,50 | 0,29569 | 1,23  | 2,34  | 0,11659 | NM_005094         | TRDN         |
| 8129330 | -0,59 | -1,50 | 0,13763 | -1,03 | -2,04 | 0,00807 | NM_006073         | EHHADH       |
| 8092523 | -0,59 | -1,50 | 0,00970 | 0,98  | 1,97  | 0,03401 | NM_001966         | PRR14        |
| 7994858 | -0,59 | -1,50 | 0,38237 | 0,45  | 1,37  | 0,19627 | NM_024031         | ---          |
| 8059475 | -0,59 | -1,50 | 0,16775 | -0,16 | -1,12 | 0,65187 | --- ZNF335        |              |
| 8066641 | -0,59 | -1,50 | 0,01414 | 0,94  | 1,92  | 0,02546 | NM_022095         | LOC100129534 |
| 7911718 | -0,59 | -1,50 | 0,41202 | 0,14  | 1,10  | 0,63662 | NR_024489         | PTPN20B      |
| 7933379 | -0,59 | -1,50 | 0,04235 | 0,96  | 1,95  | 0,00427 | NM_001042357      | ---          |
| 8136727 | -0,59 | -1,50 | 0,06741 | -0,82 | -1,77 | 0,00107 | --- FYB           |              |
| 8105061 | -0,59 | -1,50 | 0,15609 | -1,18 | -2,26 | 0,00472 | NM_001465         | NSUN5        |
| 8140020 | -0,59 | -1,50 | 0,35766 | 2,99  | 7,97  | 0,00556 | NM_018044         | KRT6C        |
| 7963410 | -0,59 | -1,50 | 0,33915 | -1,03 | -2,04 | 0,11181 | NM_173086         | WASH1        |
| 8159790 | -0,59 | -1,50 | 0,47267 | 0,98  | 1,97  | 0,02062 | NM_182905         | C7orf54      |
| 8135902 | -0,59 | -1,50 | 0,00723 | -0,75 | -1,68 | 0,00671 | NR_027330         | NPY2R        |
| 8097938 | -0,59 | -1,50 | 0,13215 | -2,08 | -4,23 | 0,00002 | NM_000910         | ---          |
| 8036954 | -0,59 | -1,50 | 0,01189 | -0,87 | -1,83 | 0,01689 | --- USP18         |              |
| 8071155 | -0,59 | -1,50 | 0,40029 | 2,62  | 6,14  | 0,01808 | NM_017414         | HTR7P1       |
| 7954071 | -0,59 | -1,50 | 0,08253 | -1,12 | -2,18 | 0,00929 | NR_002774         | NOD2         |
| 7995539 | -0,59 | -1,50 | 0,05272 | -0,68 | -1,60 | 0,00844 | NM_022162         | TARP         |
| 8139107 | -0,59 | -1,50 | 0,27820 | -1,13 | -2,18 | 0,05402 | NM_001003799      | ---          |
| 8156132 | -0,59 | -1,50 | 0,09387 | -1,11 | -2,16 | 0,08324 | --- TLR5          |              |
| 7924499 | -0,59 | -1,50 | 0,02770 | 1,22  | 2,32  | 0,00974 | NM_003268         | CALCR        |
| 8140995 | -0,59 | -1,50 | 0,10146 | -0,90 | -1,87 | 0,01056 | NM_001164737      | ---          |
| 8167871 | -0,59 | -1,50 | 0,19317 | -0,39 | -1,31 | 0,18456 | --- ZNF434        |              |
| 7998967 | -0,59 | -1,50 | 0,04571 | -0,38 | -1,30 | 0,07996 | NM_017810         | LOC349196    |
| 8149153 | -0,59 | -1,50 | 0,65969 | -1,48 | -2,79 | 0,09931 | NR_027000         | LOC349196    |
| 8149157 | -0,59 | -1,50 | 0,65969 | -1,48 | -2,79 | 0,09931 | NR_027000         | GDF11        |
| 7956026 | -0,59 | -1,50 | 0,12847 | -0,32 | -1,25 | 0,56356 | NM_005811         | PNPLA7       |
| 8165575 | -0,59 | -1,50 | 0,01221 | -0,42 | -1,34 | 0,04842 | NM_001098537      | SPC25        |
| 8056572 | -0,59 | -1,50 | 0,42063 | 0,86  | 1,82  | 0,15804 | NM_020675         | RIMBP3       |

|         |       |       |         |       |       |         |                              |              |
|---------|-------|-------|---------|-------|-------|---------|------------------------------|--------------|
| 8074771 | -0,59 | -1,50 | 0,02390 | -0,24 | -1,18 | 0,20575 | NM_015672                    | GPT2         |
| 7995362 | -0,59 | -1,50 | 0,11453 | 1,85  | 3,62  | 0,00554 | NM_133443                    | LCN1         |
| 8158995 | -0,59 | -1,50 | 0,40958 | -1,05 | -2,07 | 0,04378 | NM_002297                    | SNORD115-6   |
| 7982018 | -0,59 | -1,50 | 0,42470 | -1,80 | -3,49 | 0,00008 | NR_003298                    | ITIH5L       |
| 8173106 | -0,59 | -1,50 | 0,21130 | -0,94 | -1,92 | 0,00722 | NM_198510                    | ---          |
| 7961889 | -0,59 | -1,50 | 0,10880 | -1,82 | -3,54 | 0,02243 | --- AP3B2                    | ---          |
| 7990987 | -0,59 | -1,50 | 0,07600 | 0,26  | 1,20  | 0,38790 | NM_004644                    | MIR215       |
| 7924401 | -0,59 | -1,50 | 0,08908 | -0,59 | -1,50 | 0,04216 | NR_029628                    | LRRRC68      |
| 8029624 | -0,59 | -1,50 | 0,05659 | 0,63  | 1,55  | 0,15915 | ENST00000421905              | ---          |
| 8070871 | -0,59 | -1,50 | 0,06232 | -0,52 | -1,43 | 0,10470 | --- ---                      | ---          |
| 8106401 | -0,59 | -1,50 | 0,05579 | -1,13 | -2,19 | 0,04322 | --- LRRRC50                  | ---          |
| 7997556 | -0,59 | -1,50 | 0,04797 | -1,03 | -2,04 | 0,03029 | NM_178452                    | SORCS1       |
| 7936249 | -0,59 | -1,50 | 0,06101 | -0,91 | -1,88 | 0,00456 | NM_052918                    | GSTZ1        |
| 7975956 | -0,59 | -1,50 | 0,23338 | 0,29  | 1,23  | 0,35155 | NM_001513                    | LRFN5        |
| 7974109 | -0,59 | -1,50 | 0,03557 | -2,02 | -4,04 | 0,00265 | NM_152447                    | KLHL32       |
| 8121193 | -0,59 | -1,50 | 0,02494 | -0,81 | -1,75 | 0,12384 | NM_052904                    | ---          |
| 8169443 | -0,59 | -1,50 | 0,18107 | -0,90 | -1,87 | 0,00050 | --- MAP3K15                  | ---          |
| 8171653 | -0,59 | -1,50 | 0,07823 | 0,94  | 1,92  | 0,00203 | NM_001001671                 | LOC284542    |
| 7915949 | -0,59 | -1,50 | 0,55555 | -1,67 | -3,19 | 0,04152 | AK090467 ANKRD11             | ---          |
| 8003448 | -0,59 | -1,50 | 0,02512 | 1,47  | 2,76  | 0,03524 | NM_013275                    | OR1F1        |
| 7992863 | -0,59 | -1,50 | 0,30038 | 2,15  | 4,43  | 0,01984 | NM_012360                    | ---          |
| 8075162 | -0,59 | -1,50 | 0,02585 | -1,07 | -2,10 | 0,01188 | --- FGF10                    | ---          |
| 8111993 | -0,59 | -1,50 | 0,11540 | -1,60 | -3,03 | 0,02405 | NM_004465                    | OR56B4       |
| 7938072 | -0,59 | -1,50 | 0,29430 | -1,45 | -2,72 | 0,00074 | NM_001005181                 | PLEKHG4      |
| 7996516 | -0,59 | -1,50 | 0,11043 | 0,26  | 1,20  | 0,01664 | NM_015432                    | ARHGAP9      |
| 7964436 | -0,59 | -1,50 | 0,11690 | -0,07 | -1,05 | 0,55722 | NM_032496                    | BEND5        |
| 7915982 | -0,59 | -1,50 | 0,30635 | -1,06 | -2,09 | 0,11607 | NM_024603                    | MED30        |
| 8148022 | -0,59 | -1,50 | 0,14292 | -0,18 | -1,13 | 0,48922 | NM_080651                    | SNORA13      |
| 8107326 | -0,59 | -1,50 | 0,15967 | -0,36 | -1,28 | 0,25045 | NR_002922                    | STAT4        |
| 8057771 | -0,59 | -1,50 | 0,06705 | 0,94  | 1,92  | 0,07884 | NM_003151                    | HBII-52-27   |
| 7982060 | -0,59 | -1,50 | 0,03420 | -0,47 | -1,38 | 0,00914 | NR_003496                    | ---          |
| 8021961 | -0,59 | -1,50 | 0,04817 | -0,88 | -1,85 | 0,03861 | --- OR8J3 // OR8J3           | ---          |
| 7948119 | -0,59 | -1,50 | 0,00911 | -0,98 | -1,97 | 0,00245 | NM_001004064 // NM_001004064 | ---          |
| ---     | ---   | ---   | ---     | ---   | ---   | ---     | ---                          | ---          |
| 8140965 | -0,59 | -1,50 | 0,28869 | -1,75 | -3,37 | 0,02941 | --- FERD3L                   | ---          |
| 8138450 | -0,59 | -1,50 | 0,28721 | -0,79 | -1,73 | 0,01922 | NM_152898                    | ---          |
| 7907049 | -0,59 | -1,50 | 0,18975 | -0,68 | -1,60 | 0,01394 | --- LOC349196                | ---          |
| 7953735 | -0,59 | -1,50 | 0,67870 | -1,70 | -3,26 | 0,08709 | NR_027000                    | ---          |
| 8037387 | -0,59 | -1,50 | 0,08379 | -1,43 | -2,70 | 0,00105 | ---                          | ---          |
| 8144488 | -0,59 | -1,50 | 0,65917 | -1,57 | -2,97 | 0,16727 | --- CDK20                    | ---          |
| 8162194 | -0,59 | -1,50 | 0,07171 | 0,24  | 1,18  | 0,37031 | NM_178432                    | ---          |
| 8013570 | -0,59 | -1,50 | 0,20756 | -0,69 | -1,62 | 0,00288 | --- OR5P2                    | ---          |
| 7946323 | -0,59 | -1,50 | 0,07479 | -1,37 | -2,59 | 0,00798 | NM_153444                    | MS4A10       |
| 7940341 | -0,59 | -1,51 | 0,40849 | -1,49 | -2,81 | 0,00578 | NM_206893                    | DNAJA4       |
| 7985147 | -0,59 | -1,51 | 0,08390 | 1,19  | 2,28  | 0,01155 | NM_018602                    | OBSL1        |
| 8059249 | -0,59 | -1,51 | 0,28855 | 0,10  | 1,07  | 0,44541 | NM_015311                    | ---          |
| 8142538 | -0,59 | -1,51 | 0,21595 | -0,47 | -1,38 | 0,09890 | ---                          | ---          |
| 8160470 | -0,59 | -1,51 | 0,22641 | -1,07 | -2,10 | 0,02199 | --- CAPN6                    | ---          |
| 8174527 | -0,59 | -1,51 | 0,09776 | -1,07 | -2,10 | 0,00402 | NM_014289                    | ZNF629       |
| 8000941 | -0,59 | -1,51 | 0,08945 | -0,80 | -1,74 | 0,22904 | NM_001080417                 | MIR122       |
| 8021416 | -0,59 | -1,51 | 0,02725 | -0,94 | -1,92 | 0,00256 | NR_029667                    | CCDC144A     |
| 8005204 | -0,59 | -1,51 | 0,05663 | 0,43  | 1,35  | 0,40461 | NM_014695                    | ---          |
| 8030826 | -0,59 | -1,51 | 0,00765 | -0,87 | -1,83 | 0,00953 | --- UCP2                     | ---          |
| 7950307 | -0,59 | -1,51 | 0,35009 | 1,94  | 3,85  | 0,00566 | NM_003355                    | MIR9-3       |
| 7985871 | -0,59 | -1,51 | 0,18699 | -0,94 | -1,92 | 0,00077 | NR_029692                    | GET4         |
| 8131044 | -0,59 | -1,51 | 0,30754 | 1,38  | 2,61  | 0,09683 | NM_015949                    | NCF1         |
| 8140227 | -0,59 | -1,51 | 0,03362 | -1,32 | -2,50 | 0,00012 | NM_000265                    | ---          |
| 8076384 | -0,59 | -1,51 | 0,29952 | -1,87 | -3,67 | 0,00504 | --- SEMA3B                   | ---          |
| 8079966 | -0,59 | -1,51 | 0,23251 | -0,15 | -1,11 | 0,57696 | NM_004636                    | KNG1         |
| 8084679 | -0,59 | -1,51 | 0,05678 | -0,69 | -1,62 | 0,01231 | NM_000893                    | ACOT11       |
| 7901613 | -0,59 | -1,51 | 0,19149 | -0,61 | -1,53 | 0,00030 | NM_147161                    | OR11H1       |
| 7972981 | -0,59 | -1,51 | 0,15203 | -2,68 | -6,40 | 0,00030 | NM_001005239                 | OR11H1       |
| 8074194 | -0,59 | -1,51 | 0,15203 | -2,68 | -6,40 | 0,00030 | NM_001005239                 | AGAP4        |
| 7933405 | -0,59 | -1,51 | 0,28567 | 1,34  | 2,54  | 0,01079 | NM_133446                    | LOC100293553 |
| 8169231 | -0,59 | -1,51 | 0,26852 | -1,41 | -2,66 | 0,00437 | ENST00000372451              | OR4Q2        |
| 7973020 | -0,59 | -1,51 | 0,36335 | -1,70 | -3,25 | 0,00753 | ENST00000357151              | ---          |
| 8169715 | -0,59 | -1,51 | 0,16326 | -1,34 | -2,53 | 0,01848 | --- CEACAM3                  | ---          |
| 8029107 | -0,59 | -1,51 | 0,20668 | -1,60 | -3,04 | 0,04717 | NM_001815                    | CIB2         |
| 7990674 | -0,59 | -1,51 | 0,00984 | -0,28 | -1,22 | 0,26105 | NM_006383                    | RP11-90M2.3  |
| 7971561 | -0,59 | -1,51 | 0,11956 | -0,59 | -1,50 | 0,01230 | ENST00000438155              | FAM71F1      |
| 8135945 | -0,59 | -1,51 | 0,32699 | -1,04 | -2,05 | 0,03921 | NM_032599                    | ---          |
| 8155024 | -0,59 | -1,51 | 0,00570 | -1,17 | -2,25 | 0,01452 | ---                          | ---          |
| 8174302 | -0,59 | -1,51 | 0,22222 | -0,62 | -1,53 | 0,03222 | --- OR2T11                   | ---          |

|         |       |       |         |       |       |         |                 |            |
|---------|-------|-------|---------|-------|-------|---------|-----------------|------------|
| 7925755 | -0,59 | -1,51 | 0,23309 | -1,53 | -2,88 | 0,00048 | NM_001001964    | PARD6G     |
| 8023926 | -0,59 | -1,51 | 0,14601 | -0,05 | -1,04 | 0,62954 | NM_032510       | ---        |
| 8136891 | -0,59 | -1,51 | 0,08762 | -0,64 | -1,56 | 0,02016 | ---             | ---        |
| 8125434 | -0,59 | -1,51 | 0,09711 | -0,74 | -1,67 | 0,11569 | ---             | ---        |
| 7936089 | -0,59 | -1,51 | 0,21875 | -0,61 | -1,53 | 0,07970 | ---             | ---        |
| 8126119 | -0,59 | -1,51 | 0,01295 | -0,73 | -1,65 | 0,06678 | ---             | ---        |
| 8050801 | -0,59 | -1,51 | 0,07276 | -0,63 | -1,55 | 0,09614 | ---             | ---        |
| 7945084 | -0,59 | -1,51 | 0,19229 | -1,02 | -2,02 | 0,02944 | ---             | GPR83      |
| 7951040 | -0,59 | -1,51 | 0,24162 | -1,36 | -2,58 | 0,03576 | NM_016540       | HIRIP3     |
| 8000748 | -0,59 | -1,51 | 0,07219 | -0,69 | -1,61 | 0,04012 | NM_003609       | SLC10A6    |
| 8101609 | -0,59 | -1,51 | 0,27222 | -1,36 | -2,57 | 0,02895 | NM_197965       | ---        |
| 8091627 | -0,59 | -1,51 | 0,03504 | -0,85 | -1,81 | 0,09060 | ---             | TMPRSS13   |
| 7951987 | -0,59 | -1,51 | 0,06629 | -0,17 | -1,12 | 0,36373 | NM_001077263    | ---        |
| 8139055 | -0,59 | -1,51 | 0,13856 | -1,91 | -3,76 | 0,02838 | ---             | C16orf88   |
| 7999903 | -0,59 | -1,51 | 0,02949 | 0,36  | 1,29  | 0,39359 | NM_001012991    | TSPAN12    |
| 8142524 | -0,59 | -1,51 | 0,14914 | 0,28  | 1,22  | 0,31286 | NM_012338       | FLJ00049   |
| 8131140 | -0,59 | -1,51 | 0,04951 | -0,42 | -1,34 | 0,39901 | AK024457        | ---        |
| 8084834 | -0,59 | -1,51 | 0,01543 | -1,07 | -2,09 | 0,01972 | ---             | CLEC4D     |
| 7953749 | -0,59 | -1,51 | 0,06038 | -0,66 | -1,58 | 0,01589 | NM_080387       | ROM1       |
| 7940662 | -0,59 | -1,51 | 0,11382 | -0,90 | -1,86 | 0,00302 | NM_000327       | AMIGO1     |
| 7918359 | -0,59 | -1,51 | 0,18499 | -1,24 | -2,36 | 0,12049 | NM_020703       | ---        |
| 7969914 | -0,59 | -1,51 | 0,03091 | -0,77 | -1,70 | 0,00017 | ---             | HKR1       |
| 8028233 | -0,59 | -1,51 | 0,20363 | 0,18  | 1,13  | 0,69130 | NM_181786       | ---        |
| 7979961 | -0,59 | -1,51 | 0,08090 | -1,18 | -2,26 | 0,01943 | ---             | ---        |
| 7951552 | -0,59 | -1,51 | 0,14726 | -0,81 | -1,76 | 0,03277 | ---             | ---        |
| 7993110 | -0,59 | -1,51 | 0,23187 | -0,75 | -1,69 | 0,01437 | ---             | LOC554249  |
| 8161353 | -0,59 | -1,51 | 0,16066 | 0,32  | 1,25  | 0,02029 | AK292642        | HOXD12     |
| 8046527 | -0,59 | -1,51 | 0,10852 | -0,98 | -1,98 | 0,00671 | NM_021193       | C18orf1    |
| 8020308 | -0,59 | -1,51 | 0,23555 | -1,33 | -2,51 | 0,05601 | NM_181481       | PRM1       |
| 7999440 | -0,60 | -1,51 | 0,19788 | -1,94 | -3,84 | 0,00254 | NM_002761       | SLC15A1    |
| 7972461 | -0,60 | -1,51 | 0,06268 | 0,06  | 1,04  | 0,71246 | NM_005073       | ---        |
| 7920795 | -0,60 | -1,51 | 0,11694 | -0,94 | -1,91 | 0,00419 | ---             | MYH16      |
| 8134564 | -0,60 | -1,51 | 0,20881 | -0,64 | -1,55 | 0,04394 | NR_002147       | ---        |
| 7977125 | -0,60 | -1,51 | 0,00112 | -0,62 | -1,53 | 0,00598 | ---             | CCDC12     |
| 8086698 | -0,60 | -1,51 | 0,05088 | -1,14 | -2,20 | 0,03690 | NM_144716       | FLJ43860   |
| 8148512 | -0,60 | -1,51 | 0,14140 | -0,50 | -1,42 | 0,33823 | NM_207414       | C14orf166B |
| 7975901 | -0,60 | -1,51 | 0,02586 | -1,17 | -2,24 | 0,03549 | NM_194287       | ---        |
| 8102408 | -0,60 | -1,51 | 0,14593 | -0,87 | -1,83 | 0,00016 | ---             | TAS2R19    |
| 7961287 | -0,60 | -1,51 | 0,20325 | -0,34 | -1,27 | 0,15190 | NM_176888       | HAVCR2     |
| 8115464 | -0,60 | -1,51 | 0,04884 | -0,94 | -1,92 | 0,01327 | NM_032782       | ---        |
| 8096030 | -0,60 | -1,51 | 0,00514 | -0,87 | -1,83 | 0,02634 | ---             | LOC400499  |
| 7999447 | -0,60 | -1,51 | 0,13792 | -1,23 | -2,34 | 0,00615 | ENST00000344649 | MAGEB5     |
| 8166576 | -0,60 | -1,51 | 0,02679 | -0,65 | -1,57 | 0,00586 | ENST00000379029 | ---        |
| 8154447 | -0,60 | -1,51 | 0,11887 | -0,46 | -1,38 | 0,06049 | ---             | ---        |
| 8083229 | -0,60 | -1,51 | 0,07070 | -1,05 | -2,07 | 0,01757 | ---             | ACOT11     |
| 7916412 | -0,60 | -1,51 | 0,20272 | -1,98 | -3,94 | 0,04926 | NM_147161       | ---        |
| 8025474 | -0,60 | -1,51 | 0,15489 | -1,33 | -2,52 | 0,00747 | ---             | ST6GALNAC4 |
| 8164314 | -0,60 | -1,51 | 0,04892 | 0,86  | 1,81  | 0,18181 | NM_175039       | ---        |
| 8001656 | -0,60 | -1,51 | 0,27984 | -1,34 | -2,53 | 0,00464 | ---             | AIPL1      |
| 8011912 | -0,60 | -1,51 | 0,19323 | -1,02 | -2,03 | 0,00104 | NM_014336       | PGA4       |
| 7940431 | -0,60 | -1,51 | 0,41090 | -1,56 | -2,96 | 0,02535 | NM_001079808    | RETNLB     |
| 8089394 | -0,60 | -1,51 | 0,31823 | -0,97 | -1,96 | 0,06248 | NM_032579       | STK32A     |
| 8108981 | -0,60 | -1,51 | 0,03519 | 3,01  | 8,08  | 0,00435 | NM_001112724    | LOC554207  |
| 7973182 | -0,60 | -1,51 | 0,29888 | -1,04 | -2,05 | 0,00209 | ENST00000320322 | ---        |
| 7932086 | -0,60 | -1,51 | 0,04629 | 0,02  | 1,01  | 0,82214 | ---             | GDPD4      |
| 7950560 | -0,60 | -1,51 | 0,01909 | -1,25 | -2,37 | 0,00035 | NM_182833       | MUC7       |
| 8095504 | -0,60 | -1,51 | 0,11338 | -1,24 | -2,35 | 0,00098 | NM_001145006    | IRF4       |
| 8116559 | -0,60 | -1,51 | 0,13544 | -0,99 | -1,98 | 0,06870 | NM_002460       | CABIN1     |
| 8071823 | -0,60 | -1,51 | 0,22074 | 0,27  | 1,20  | 0,60977 | NM_012295       | ---        |
| 8087778 | -0,60 | -1,51 | 0,14621 | -1,22 | -2,33 | 0,00314 | ---             | ---        |
| 8031568 | -0,60 | -1,51 | 0,35427 | -1,67 | -3,17 | 0,00101 | ---             | DAB1       |
| 7916566 | -0,60 | -1,51 | 0,01251 | -1,09 | -2,12 | 0,02470 | AF263547        | PDE6A      |
| 8115041 | -0,60 | -1,51 | 0,18723 | -0,90 | -1,87 | 0,00580 | NM_000440       | ---        |
| 7953965 | -0,60 | -1,51 | 0,07716 | -0,89 | -1,85 | 0,03117 | ---             | ---        |
| 8062478 | -0,60 | -1,51 | 0,02297 | -0,69 | -1,62 | 0,00836 | ---             | TK2        |
| 7996286 | -0,60 | -1,51 | 0,28561 | -2,21 | -4,63 | 0,00047 | NM_004614       | CDSN       |
| 8179716 | -0,60 | -1,51 | 0,51528 | -1,56 | -2,94 | 0,01353 | NM_001264       | ZNF697     |
| 7919051 | -0,60 | -1,51 | 0,00051 | -1,16 | -2,24 | 0,07276 | NM_001080470    | ---        |
| 8135847 | -0,60 | -1,51 | 0,22041 | -0,89 | -1,85 | 0,01171 | ---             | OR12D2     |
| 8177700 | -0,60 | -1,51 | 0,17351 | -1,03 | -2,04 | 0,05640 | NM_013936       | ---        |
| 8146423 | -0,60 | -1,51 | 0,25646 | -1,06 | -2,08 | 0,00085 | ---             | ---        |
| 8095356 | -0,60 | -1,51 | 0,04093 | -0,32 | -1,25 | 0,21908 | ---             | LOC349196  |
| 8149161 | -0,60 | -1,51 | 0,61782 | -1,29 | -2,44 | 0,11401 | NR_027000       | LOC349196  |



|         |                              |       |         |       |       |         |                      |              |
|---------|------------------------------|-------|---------|-------|-------|---------|----------------------|--------------|
| 7898350 | -0,60                        | -1,52 | 0,38013 | -0,55 | -1,46 | 0,23238 | BC126340 // BC126340 |              |
|         | LOC100132147 // LOC100132147 |       |         |       |       |         |                      |              |
| 7912884 | -0,60                        | -1,52 | 0,38013 | -0,55 | -1,46 | 0,23238 | BC126340 // BC126340 | CCDC84       |
| 7944365 | -0,60                        | -1,52 | 0,23869 | 3,65  | 12,53 | 0,00011 | NM_198489            | CCDC136      |
| 8135969 | -0,60                        | -1,52 | 0,12789 | -0,46 | -1,38 | 0,10177 | NM_022742            | ---          |
| 8042825 | -0,61                        | -1,52 | 0,20467 | -0,27 | -1,21 | 0,25798 | ---                  | OR1Q1        |
| 8157679 | -0,61                        | -1,52 | 0,26855 | -1,95 | -3,88 | 0,00120 | NM_012364            | ---          |
| 7965916 | -0,61                        | -1,52 | 0,00069 | -1,27 | -2,42 | 0,00167 | ---                  | UGT3A1       |
| 8111512 | -0,61                        | -1,52 | 0,07737 | -1,41 | -2,66 | 0,02588 | NM_152404            | SNORA68      |
| 8026875 | -0,61                        | -1,52 | 0,00603 | -0,49 | -1,40 | 0,31899 | NR_000012            | ITIH4        |
| 8088020 | -0,61                        | -1,52 | 0,32716 | -1,31 | -2,47 | 0,00077 | NM_002218            | KRT3         |
| 7963523 | -0,61                        | -1,52 | 0,09974 | -0,35 | -1,27 | 0,25781 | NM_057088            | LCE1E        |
| 7905519 | -0,61                        | -1,52 | 0,12802 | -1,01 | -2,01 | 0,09444 | NM_178353            | RGL2         |
| 8178955 | -0,61                        | -1,52 | 0,14883 | 1,10  | 2,14  | 0,12822 | NM_004761            | RGL2         |
| 8180144 | -0,61                        | -1,52 | 0,14883 | 1,10  | 2,14  | 0,12822 | NM_004761            | TRAF2        |
| 8159476 | -0,61                        | -1,52 | 0,01773 | 0,73  | 1,66  | 0,12010 | NM_021138            | LOC100289612 |
| 7914878 | -0,61                        | -1,52 | 0,10830 | 0,50  | 1,41  | 0,34772 | AY605064             | DCLRE1B      |
| 7904131 | -0,61                        | -1,52 | 0,01454 | 0,21  | 1,16  | 0,54758 | NM_022836            | PSPH         |
| 8139737 | -0,61                        | -1,52 | 0,20263 | 2,56  | 5,88  | 0,00804 | NM_004577            | LOC349196    |
| 8149228 | -0,61                        | -1,52 | 0,65599 | -1,72 | -3,30 | 0,09856 | NR_027000            | RASGEF1A     |
| 7933149 | -0,61                        | -1,52 | 0,29358 | 1,42  | 2,68  | 0,00226 | NM_145313            | C18orf18     |
| 8022106 | -0,61                        | -1,52 | 0,01608 | 0,20  | 1,15  | 0,37937 | NR_026849            | FAM106A      |
| 8005687 | -0,61                        | -1,52 | 0,31495 | -0,93 | -1,91 | 0,02399 | NR_026809            | ---          |
| 8095703 | -0,61                        | -1,52 | 0,11622 | -1,65 | -3,13 | 0,00753 | ---                  | SNORD116-16  |
| 7981980 | -0,61                        | -1,52 | 0,14970 | -0,45 | -1,36 | 0,00375 | NR_003331            | INSL5        |
| 7916785 | -0,61                        | -1,52 | 0,06902 | -0,78 | -1,72 | 0,05724 | NM_005478            | CHAC2        |
| 8041961 | -0,61                        | -1,52 | 0,05395 | 1,57  | 2,97  | 0,04737 | NM_001008708         | VSX1         |
| 8065460 | -0,61                        | -1,52 | 0,15863 | -1,43 | -2,70 | 0,00100 | NM_014588            | FOXO4        |
| 8168205 | -0,61                        | -1,52 | 0,26239 | -1,19 | -2,29 | 0,05740 | NM_005938            | OR6F1        |
| 7925728 | -0,61                        | -1,52 | 0,16777 | -1,39 | -2,62 | 0,04557 | NM_001005286         | DNAJB12      |
| 7934244 | -0,61                        | -1,52 | 0,01824 | -0,06 | -1,04 | 0,58364 | NM_001002762         | C2orf14      |
| 8045210 | -0,61                        | -1,52 | 0,28483 | -1,78 | -3,44 | 0,00529 | NR_023391            | C12orf44     |
| 7955606 | -0,61                        | -1,52 | 0,04953 | -1,08 | -2,12 | 0,02117 | NM_021934            | SOC57        |
| 8006768 | -0,61                        | -1,52 | 0,10473 | 0,95  | 1,93  | 0,14517 | NM_014598            | PGLYRP3      |
| 7920220 | -0,61                        | -1,52 | 0,27634 | -2,37 | -5,16 | 0,00036 | NM_052891            | FLJ37307     |
| 7971723 | -0,61                        | -1,52 | 0,26192 | -1,19 | -2,29 | 0,01840 | NR_027047            | ---          |
| 8089757 | -0,61                        | -1,52 | 0,05032 | -1,13 | -2,18 | 0,00280 | ---                  | OR7E13P      |
| 7950883 | -0,61                        | -1,52 | 0,08614 | -1,37 | -2,59 | 0,00133 | AF238487             | NCF1         |
| 8133314 | -0,61                        | -1,52 | 0,02710 | -1,30 | -2,46 | 0,00081 | NM_000265            | ---          |
| 8163084 | -0,61                        | -1,52 | 0,08401 | -1,45 | -2,74 | 0,02781 | ---                  | TTC26        |
| 8136495 | -0,61                        | -1,52 | 0,01898 | 0,60  | 1,52  | 0,08395 | NM_024926            | MIR33A       |
| 8073544 | -0,61                        | -1,52 | 0,03212 | -0,81 | -1,75 | 0,00878 | NR_029507            | TMEM132E     |
| 8006466 | -0,61                        | -1,52 | 0,30917 | -0,90 | -1,87 | 0,16392 | NM_207313            | ---          |
| 8174592 | -0,61                        | -1,52 | 0,01234 | -0,81 | -1,76 | 0,06539 | ---                  | OR2A12       |
| 8136971 | -0,61                        | -1,52 | 0,03750 | -0,42 | -1,34 | 0,01356 | NM_001004135         | ---          |
| 8088335 | -0,61                        | -1,52 | 0,06948 | -1,01 | -2,01 | 0,02697 | ---                  | OR4C16       |
| 7939926 | -0,61                        | -1,52 | 0,20220 | -0,41 | -1,33 | 0,00062 | NM_001004701         | ---          |
| 8170235 | -0,61                        | -1,52 | 0,05290 | -1,30 | -2,46 | 0,00115 | ---                  | RCE1         |
| 7941732 | -0,61                        | -1,52 | 0,18356 | 2,56  | 5,90  | 0,01975 | NM_005133            | ---          |
| 8108040 | -0,61                        | -1,52 | 0,06945 | -0,80 | -1,74 | 0,01145 | ---                  | PTCD1        |
| 8141283 | -0,61                        | -1,52 | 0,15552 | -0,16 | -1,12 | 0,51427 | NM_015545            | TECRL        |
| 8100557 | -0,61                        | -1,52 | 0,02084 | -0,98 | -1,98 | 0,07270 | NM_001010874         | RNF32        |
| 8137566 | -0,61                        | -1,52 | 0,07406 | -1,26 | -2,40 | 0,02188 | NM_030936            | ---          |
| 7982514 | -0,61                        | -1,52 | 0,51600 | -1,67 | -3,19 | 0,17771 | ---                  | RASA4        |
| 8141803 | -0,61                        | -1,52 | 0,29481 | -0,43 | -1,35 | 0,40844 | NM_006989            | C1orf74      |
| 7924055 | -0,61                        | -1,52 | 0,13868 | 0,39  | 1,31  | 0,55023 | BC039719             | ---          |
| 8077777 | -0,61                        | -1,52 | 0,16138 | -0,98 | -1,97 | 0,03946 | ---                  | ---          |
| 7917591 | -0,61                        | -1,52 | 0,08812 | -1,10 | -2,14 | 0,08162 | ---                  | TCEB3C       |
| 8023156 | -0,61                        | -1,52 | 0,50984 | -1,87 | -3,65 | 0,01338 | NM_145653            | NHLRC1       |
| 8124129 | -0,61                        | -1,52 | 0,18067 | 0,83  | 1,78  | 0,01345 | NM_198586            | ---          |
| 8002027 | -0,61                        | -1,52 | 0,14924 | -1,17 | -2,24 | 0,00008 | ---                  | MLXIPL       |
| 8140085 | -0,61                        | -1,52 | 0,26122 | 0,92  | 1,90  | 0,21193 | NM_032951            | ---          |
| 8100426 | -0,61                        | -1,52 | 0,24295 | -1,23 | -2,35 | 0,02306 | ---                  | HIVEP3       |
| 7915392 | -0,61                        | -1,52 | 0,16327 | 0,23  | 1,17  | 0,25201 | NM_024503            | USP26        |
| 8175206 | -0,61                        | -1,52 | 0,00536 | -0,52 | -1,43 | 0,03625 | NM_031907            | CYP3A43      |
| 8134655 | -0,61                        | -1,52 | 0,07903 | -1,56 | -2,95 | 0,00669 | NM_022820            | TRIM40       |
| 8177750 | -0,61                        | -1,52 | 0,16976 | -1,44 | -2,72 | 0,00208 | NM_138700            | TRIM40       |
| 8179060 | -0,61                        | -1,52 | 0,16976 | -1,44 | -2,72 | 0,00208 | NM_138700            | CENPI        |
| 8168794 | -0,61                        | -1,52 | 0,01230 | 2,33  | 5,04  | 0,00111 | NM_006733            | GOLGA7B      |
| 7929711 | -0,61                        | -1,52 | 0,08663 | -0,01 | -1,00 | 0,92657 | NM_001010917         | ---          |
| 8020650 | -0,61                        | -1,52 | 0,37066 | -0,71 | -1,64 | 0,12455 | ---                  | DND1         |
| 8114625 | -0,61                        | -1,52 | 0,56177 | -0,88 | -1,84 | 0,04313 | NM_194249            | SPINK2       |
| 8100523 | -0,61                        | -1,52 | 0,01810 | 0,11  | 1,08  | 0,66168 | NM_021114            | ---          |

|         |       |       |         |       |       |         |                 |          |                 |
|---------|-------|-------|---------|-------|-------|---------|-----------------|----------|-----------------|
| 8172305 | -0,61 | -1,52 | 0,22365 | -1,09 | -2,13 | 0,01146 | ---             | BACH2    |                 |
| 8128247 | -0,61 | -1,52 | 0,02478 | -0,84 | -1,79 | 0,02313 | NM_021813       |          | ARHGAP33        |
| 8028030 | -0,61 | -1,52 | 0,08599 | -0,18 | -1,14 | 0,36477 | NM_001172630    |          | OR10G8          |
| 7944801 | -0,61 | -1,53 | 0,04034 | -1,39 | -2,62 | 0,00110 | NM_001004464    |          | ---             |
| 8040247 | -0,61 | -1,53 | 0,06852 | -0,35 | -1,28 | 0,48929 | ---             | ---      |                 |
| 8053713 | -0,61 | -1,53 | 0,69392 | -2,51 | -5,69 | 0,00030 | ---             | KRT80    |                 |
| 7963333 | -0,61 | -1,53 | 0,08495 | 2,32  | 4,99  | 0,00269 | NM_182507       |          | GRAMD1C         |
| 8081758 | -0,61 | -1,53 | 0,07981 | 1,99  | 3,98  | 0,00911 | NM_017577       |          | ---             |
| 8139118 | -0,61 | -1,53 | 0,46227 | 0,17  | 1,12  | 0,55217 | ---             | HS3ST4   |                 |
| 7994260 | -0,61 | -1,53 | 0,19810 | -1,26 | -2,39 | 0,02073 | NM_006040       |          | WDR38           |
| 8157818 | -0,61 | -1,53 | 0,13613 | -1,82 | -3,52 | 0,00641 | NM_001045476    |          | SIRT3           |
| 7945357 | -0,61 | -1,53 | 0,07571 | 2,17  | 4,52  | 0,00108 | NM_012239       |          | ---             |
| 8147862 | -0,61 | -1,53 | 0,01732 | -1,27 | -2,42 | 0,02197 | ---             | ---      |                 |
| 7955423 | -0,61 | -1,53 | 0,09145 | -1,78 | -3,44 | 0,00000 | ---             | MAFA     |                 |
| 8153409 | -0,61 | -1,53 | 0,08244 | -0,77 | -1,71 | 0,03960 | NM_201589       |          | OR9Q1           |
| 7940103 | -0,61 | -1,53 | 0,10615 | -2,00 | -3,99 | 0,01420 | NM_001005212    |          | ---             |
| 8125857 | -0,61 | -1,53 | 0,15324 | -1,41 | -2,65 | 0,00763 | ---             | ADAM22   |                 |
| 8133983 | -0,61 | -1,53 | 0,00004 | 0,35  | 1,28  | 0,04901 | NM_021723       |          | hCG_1651160     |
| 7937934 | -0,61 | -1,53 | 0,30573 | -1,02 | -2,02 | 0,00806 | ENST00000421628 |          | hCG_1651160     |
| 7945954 | -0,61 | -1,53 | 0,30573 | -1,02 | -2,02 | 0,00806 | ENST00000421628 |          | MYO18B          |
| 8072039 | -0,61 | -1,53 | 0,08311 | -1,05 | -2,07 | 0,03454 | NM_032608       |          | RUNDC1          |
| 8007435 | -0,61 | -1,53 | 0,11812 | 0,87  | 1,83  | 0,00299 | NM_173079       |          | SPANXN3         |
| 8175572 | -0,61 | -1,53 | 0,00815 | -0,33 | -1,26 | 0,07087 | NM_001009609    |          | PTPN20A         |
| 7933263 | -0,61 | -1,53 | 0,02395 | 0,91  | 1,88  | 0,00557 | NM_001042389    |          | ---             |
| 8113276 | -0,61 | -1,53 | 0,03593 | -0,62 | -1,54 | 0,01099 | ---             | ---      |                 |
| 8084836 | -0,61 | -1,53 | 0,05555 | -1,05 | -2,07 | 0,00589 | ---             | TIFA     |                 |
| 8102362 | -0,61 | -1,53 | 0,33487 | 1,18  | 2,27  | 0,05049 | NM_052864       |          | PPP1R16B        |
| 8062557 | -0,61 | -1,53 | 0,15743 | -0,54 | -1,45 | 0,12030 | NM_015568       |          | B4GALNT1        |
| 7964484 | -0,61 | -1,53 | 0,25536 | 1,89  | 3,71  | 0,03255 | NM_001478       |          | C6orf47         |
| 8178552 | -0,61 | -1,53 | 0,03122 | 0,26  | 1,20  | 0,69841 | NM_021184       |          | C6orf47         |
| 8179808 | -0,61 | -1,53 | 0,03122 | 0,26  | 1,20  | 0,69841 | NM_021184       |          | KRTAP9-2        |
| 8007123 | -0,61 | -1,53 | 0,26418 | -1,14 | -2,21 | 0,01326 | NM_031961       |          | ARHGEF10        |
| 8144315 | -0,61 | -1,53 | 0,05157 | -0,65 | -1,57 | 0,21371 | BC026965        | MMP10    |                 |
| 7951259 | -0,61 | -1,53 | 0,00222 | -1,18 | -2,27 | 0,00091 | NM_002425       |          | AKR7A2          |
| 7913156 | -0,61 | -1,53 | 0,02739 | 2,15  | 4,44  | 0,00743 | NM_003689       |          | C11orf40        |
| 7945974 | -0,61 | -1,53 | 0,08859 | -1,05 | -2,07 | 0,05069 | NM_144663       |          | ASCL4           |
| 7958396 | -0,61 | -1,53 | 0,17450 | -1,22 | -2,32 | 0,06816 | NM_203436       |          | INTS1           |
| 8137739 | -0,61 | -1,53 | 0,00742 | 1,00  | 2,00  | 0,12709 | NM_001080453    |          | ---             |
| 7970542 | -0,61 | -1,53 | 0,04741 | -1,16 | -2,24 | 0,08659 | ---             | C6orf81  |                 |
| 8118981 | -0,61 | -1,53 | 0,06643 | -0,74 | -1,67 | 0,02117 | BC033033        | CYB561D1 |                 |
| 7903688 | -0,61 | -1,53 | 0,28485 | -0,30 | -1,23 | 0,60873 | NM_182580       |          | FLJ40194        |
| 8008195 | -0,61 | -1,53 | 0,04168 | -1,15 | -2,22 | 0,01345 | AK097513        | TEX261   |                 |
| 8042566 | -0,61 | -1,53 | 0,19554 | -0,44 | -1,36 | 0,00479 | NM_144582       |          | AOAH            |
| 8139033 | -0,61 | -1,53 | 0,14926 | 0,11  | 1,08  | 0,78328 | NM_001637       |          | KERA            |
| 7965398 | -0,61 | -1,53 | 0,03583 | -0,79 | -1,73 | 0,04808 | NM_007035       |          | TBC1D3          |
| 8014633 | -0,61 | -1,53 | 0,33719 | 1,27  | 2,41  | 0,06147 | NM_001123391    |          | ---             |
| 8176921 | -0,61 | -1,53 | 0,42432 | -0,54 | -1,45 | 0,14230 | ---             | ---      |                 |
| 8177424 | -0,61 | -1,53 | 0,42432 | -0,54 | -1,45 | 0,14230 | ---             | ---      |                 |
| 8075918 | -0,61 | -1,53 | 0,09294 | -1,10 | -2,14 | 0,01582 | ---             | ---      |                 |
| 8020252 | -0,61 | -1,53 | 0,01103 | -0,50 | -1,41 | 0,17380 | ---             | DNAH14   |                 |
| 7910054 | -0,61 | -1,53 | 0,00010 | -0,23 | -1,17 | 0,34363 | NM_001373       |          | ARVP6125        |
| 8082583 | -0,61 | -1,53 | 0,33266 | -0,33 | -1,25 | 0,49932 | AY358247        | BRD1     |                 |
| 8076836 | -0,61 | -1,53 | 0,03885 | 1,34  | 2,53  | 0,01315 | NM_014577       |          | FAM106C         |
| 8005231 | -0,61 | -1,53 | 0,26613 | -0,85 | -1,80 | 0,03622 | NR_026810       |          | TMC4            |
| 8039144 | -0,61 | -1,53 | 0,14374 | 1,57  | 2,97  | 0,02294 | NM_001145303    |          | ---             |
| 8048118 | -0,61 | -1,53 | 0,02971 | -1,42 | -2,68 | 0,00481 | ---             | SLCO1B1  |                 |
| 7954356 | -0,61 | -1,53 | 0,01179 | -1,21 | -2,31 | 0,01671 | NM_006446       |          | LOC220429       |
| 7969151 | -0,61 | -1,53 | 0,02430 | -0,81 | -1,75 | 0,04385 | NR_003268       |          | CD3E            |
| 7944179 | -0,61 | -1,53 | 0,11811 | -1,67 | -3,19 | 0,00266 | NM_000733       |          | ROPN1           |
| 8090152 | -0,61 | -1,53 | 0,10719 | -0,65 | -1,57 | 0,06954 | NM_017578       |          | MAGEE2          |
| 8173665 | -0,61 | -1,53 | 0,03615 | -0,84 | -1,79 | 0,03437 | NM_138703       |          | SLC25A21        |
| 7978692 | -0,61 | -1,53 | 0,19038 | 0,47  | 1,39  | 0,12660 | NM_030631       |          | ATP1A4          |
| 7906527 | -0,61 | -1,53 | 0,07590 | -1,59 | -3,01 | 0,00844 | NM_144699       |          | SEC14L3         |
| 8075375 | -0,61 | -1,53 | 0,34577 | -0,29 | -1,22 | 0,26790 | NM_174975       |          | ---             |
| 8059341 | -0,61 | -1,53 | 0,12196 | -0,35 | -1,27 | 0,19442 | ---             | FAM174B  |                 |
| 7991453 | -0,61 | -1,53 | 0,22547 | 0,07  | 1,05  | 0,83376 | NM_207446       |          | TNFSF12-TNFSF13 |
| 8004464 | -0,61 | -1,53 | 0,19134 | 1,40  | 2,63  | 0,01377 | NM_172089       |          | SGK2            |
| 8062728 | -0,62 | -1,53 | 0,05421 | -0,29 | -1,23 | 0,52776 | NM_016276       |          | HTN1            |
| 8095435 | -0,62 | -1,53 | 0,07530 | -0,43 | -1,35 | 0,00452 | NM_002159       |          | NCRNA00110      |
| 8068126 | -0,62 | -1,53 | 0,02113 | -1,52 | -2,87 | 0,01294 | AY077697        | MYOG     |                 |
| 7923528 | -0,62 | -1,53 | 0,28284 | -1,70 | -3,25 | 0,02508 | NM_002479       |          | SLC22A7         |
| 8119782 | -0,62 | -1,53 | 0,04784 | -0,83 | -1,78 | 0,00301 | NM_006672       |          | RASGRP2         |
| 7949104 | -0,62 | -1,53 | 0,34134 | -0,70 | -1,62 | 0,02137 | NM_001098671    |          | ---             |

|         |       |       |         |       |       |         |                 |          |           |
|---------|-------|-------|---------|-------|-------|---------|-----------------|----------|-----------|
| 7989249 | -0,62 | -1,53 | 0,12418 | -1,00 | -2,00 | 0,08028 | ---             | ICOS     |           |
| 8047702 | -0,62 | -1,53 | 0,00261 | -0,66 | -1,58 | 0,02330 | NM_012092       |          | PCNXL3    |
| 7941364 | -0,62 | -1,53 | 0,02623 | 1,74  | 3,34  | 0,01324 | NM_032223       |          | ---       |
| 7943193 | -0,62 | -1,53 | 0,08494 | -0,94 | -1,92 | 0,00059 | ---             | REG4     |           |
| 7919067 | -0,62 | -1,53 | 0,10288 | -0,91 | -1,87 | 0,03727 | NM_001159352    |          | ---       |
| 8127660 | -0,62 | -1,53 | 0,21693 | -1,32 | -2,49 | 0,00022 | ---             | ---      |           |
| 7918953 | -0,62 | -1,53 | 0,03321 | -0,72 | -1,65 | 0,00381 | ---             | ---      |           |
| 8056993 | -0,62 | -1,53 | 0,22146 | -1,36 | -2,58 | 0,00881 | ---             | DNM1P35  |           |
| 7985030 | -0,62 | -1,53 | 0,09171 | -1,47 | -2,76 | 0,00481 | ENST00000428357 |          | WRAP53    |
| 8004556 | -0,62 | -1,53 | 0,00911 | 1,14  | 2,21  | 0,00946 | NM_018081       |          | KRTAP17-1 |
| 8015252 | -0,62 | -1,53 | 0,19495 | -1,34 | -2,53 | 0,03484 | NM_031964       |          | TPRXL     |
| 8077989 | -0,62 | -1,53 | 0,15752 | -0,99 | -1,98 | 0,02713 | NR_002223       |          | ANKRD20B  |
| 8053737 | -0,62 | -1,53 | 0,13501 | 0,30  | 1,23  | 0,39631 | NR_003366       |          | ---       |
| 8034905 | -0,62 | -1,53 | 0,11958 | -1,60 | -3,02 | 0,02306 | ---             | FAM120C  |           |
| 8173041 | -0,62 | -1,53 | 0,14708 | 0,86  | 1,81  | 0,14224 | NM_017848       |          | ATPIF1    |
| 7899424 | -0,62 | -1,53 | 0,28161 | -0,61 | -1,53 | 0,03696 | NM_178191       |          | C9orf27   |
| 8163666 | -0,62 | -1,53 | 0,05993 | -1,48 | -2,79 | 0,03692 | AB021923        |          | PCDHB10   |
| 8108724 | -0,62 | -1,53 | 0,20094 | -1,32 | -2,49 | 0,00678 | NM_018930       |          | C9orf68   |
| 8159919 | -0,62 | -1,53 | 0,05622 | -0,60 | -1,52 | 0,13003 | NM_001039395    |          | RNASEH2C  |
| 7949482 | -0,62 | -1,53 | 0,04881 | 0,78  | 1,72  | 0,12627 | NM_032193       |          | MKL1      |
| 8076241 | -0,62 | -1,53 | 0,04263 | 0,31  | 1,24  | 0,35106 | NM_020831       |          | CCDC153   |
| 7952200 | -0,62 | -1,53 | 0,15583 | -0,29 | -1,22 | 0,53990 | NM_001145018    |          | MLLT6     |
| 8014702 | -0,62 | -1,53 | 0,33717 | -0,10 | -1,07 | 0,86915 | NM_005937       |          | GPR82     |
| 8166919 | -0,62 | -1,53 | 0,05664 | -0,39 | -1,31 | 0,01727 | NM_080817       |          | RPL12     |
| 8164210 | -0,62 | -1,53 | 0,26795 | -0,75 | -1,68 | 0,03015 | NM_000976       |          | RPS4P21   |
| 8036029 | -0,62 | -1,53 | 0,08459 | -0,70 | -1,62 | 0,07511 | ENST00000334591 |          | NCAM1     |
| 7943892 | -0,62 | -1,53 | 0,04860 | -1,14 | -2,21 | 0,02970 | NM_181351       |          | GOLGA9P   |
| 7982230 | -0,62 | -1,53 | 0,21525 | -0,76 | -1,69 | 0,02165 | NR_024074       |          | ---       |
| 8098157 | -0,62 | -1,53 | 0,00091 | -0,34 | -1,26 | 0,12420 | ---             | SOD3     |           |
| 8094372 | -0,62 | -1,53 | 0,14686 | -2,02 | -4,06 | 0,00138 | NM_003102       |          | GABBR2    |
| 8162777 | -0,62 | -1,53 | 0,22789 | -1,11 | -2,16 | 0,00390 | NM_005458       |          | OR4C6     |
| 7939932 | -0,62 | -1,53 | 0,29371 | -1,68 | -3,21 | 0,05837 | NM_001004704    |          | ---       |
| 7957159 | -0,62 | -1,53 | 0,05074 | -1,33 | -2,52 | 0,00407 | ---             | TMEM86A  |           |
| 7938812 | -0,62 | -1,53 | 0,06757 | -0,25 | -1,19 | 0,41013 | NM_153347       |          | OR6C68    |
| 7956001 | -0,62 | -1,53 | 0,02208 | -0,95 | -1,93 | 0,03137 | NM_001005519    |          | FAM50B    |
| 8116658 | -0,62 | -1,53 | 0,25429 | 1,36  | 2,56  | 0,04190 | NM_012135       |          | GRAP2     |
| 8073194 | -0,62 | -1,53 | 0,13354 | -0,78 | -1,71 | 0,01238 | NM_004810       |          | MIR377    |
| 7976852 | -0,62 | -1,53 | 0,08258 | -0,77 | -1,70 | 0,02321 | NR_029869       |          | IGKC      |
| 8043438 | -0,62 | -1,53 | 0,67851 | -2,10 | -4,29 | 0,00003 | BC093097        |          | TRMT12    |
| 8148263 | -0,62 | -1,53 | 0,29545 | 0,77  | 1,71  | 0,12499 | NM_017956       |          | ---       |
| 8082252 | -0,62 | -1,53 | 0,28483 | -1,73 | -3,33 | 0,00888 | ---             | ZFP14    |           |
| 8036304 | -0,62 | -1,53 | 0,18829 | -0,32 | -1,24 | 0,28263 | NM_020917       |          | LCN2      |
| 8158167 | -0,62 | -1,53 | 0,21051 | 2,20  | 4,59  | 0,00463 | NM_005564       |          | MOV10L1   |
| 8073962 | -0,62 | -1,53 | 0,04878 | -0,84 | -1,79 | 0,03868 | NM_018995       |          | ANKFN1    |
| 8008609 | -0,62 | -1,53 | 0,10623 | -0,09 | -1,07 | 0,74454 | NM_153228       |          | ---       |
| 8159957 | -0,62 | -1,53 | 0,46642 | -1,32 | -2,49 | 0,00167 | ---             | HLA-DPB1 |           |
| 8179519 | -0,62 | -1,53 | 0,33550 | 1,59  | 3,02  | 0,00627 | NM_002121       |          | TARP      |
| 8139100 | -0,62 | -1,54 | 0,30299 | -1,09 | -2,13 | 0,00289 | M30894          |          | ADAM20    |
| 7979927 | -0,62 | -1,54 | 0,13377 | -1,22 | -2,33 | 0,01249 | NM_003814       |          | GPR6      |
| 8121454 | -0,62 | -1,54 | 0,40775 | -1,25 | -2,39 | 0,00668 | NM_005284       |          | ---       |
| 8173671 | -0,62 | -1,54 | 0,10793 | -0,38 | -1,31 | 0,06159 | ---             | ---      |           |
| 7942983 | -0,62 | -1,54 | 0,23146 | -0,84 | -1,79 | 0,01416 | ---             | OR2D3    |           |
| 7938181 | -0,62 | -1,54 | 0,13037 | -1,13 | -2,18 | 0,00679 | NM_001004684    |          | DNASE1L3  |
| 8088371 | -0,62 | -1,54 | 0,15040 | -0,63 | -1,55 | 0,06614 | NM_004944       |          | MMRN2     |
| 7934842 | -0,62 | -1,54 | 0,07921 | -0,37 | -1,30 | 0,11072 | NM_024756       |          | PDDC1     |
| 7945521 | -0,62 | -1,54 | 0,07330 | 0,51  | 1,42  | 0,36255 | NM_182612       |          | ---       |
| 8111197 | -0,62 | -1,54 | 0,00656 | -0,55 | -1,46 | 0,03226 | ---             | ---      |           |
| 8042958 | -0,62 | -1,54 | 0,05258 | -1,10 | -2,14 | 0,01134 | ---             | LOC96610 |           |
| 8071597 | -0,62 | -1,54 | 0,15922 | -1,22 | -2,32 | 0,00513 | NR_027293       |          | GCRG224   |
| 7942830 | -0,62 | -1,54 | 0,11905 | -0,66 | -1,58 | 0,01809 | ENST00000391393 |          | SLC7A13   |
| 8151637 | -0,62 | -1,54 | 0,00059 | -0,88 | -1,84 | 0,00996 | NM_138817       |          | CLDN22    |
| 8103877 | -0,62 | -1,54 | 0,05234 | -0,94 | -1,91 | 0,02741 | NM_001111319    |          | ---       |
| 8041568 | -0,62 | -1,54 | 0,00706 | -0,68 | -1,60 | 0,04104 | ---             | SMAD50S  |           |
| 8114270 | -0,62 | -1,54 | 0,34079 | -0,78 | -1,72 | 0,01331 | AF071111        |          | RFPL4A    |
| 8031573 | -0,62 | -1,54 | 0,23556 | -0,90 | -1,86 | 0,00273 | NM_001145014    |          | ---       |
| 8083164 | -0,62 | -1,54 | 0,20056 | -1,02 | -2,03 | 0,00042 | ---             | BIRC8    |           |
| 8039078 | -0,62 | -1,54 | 0,01725 | -0,97 | -1,96 | 0,01564 | NM_033341       |          | ---       |
| 8139907 | -0,62 | -1,54 | 0,11041 | -0,84 | -1,79 | 0,00907 | ---             | C10orf85 |           |
| 7930994 | -0,62 | -1,54 | 0,07576 | -0,53 | -1,44 | 0,14701 | BC108662        |          | ---       |
| 8067899 | -0,62 | -1,54 | 0,00017 | -0,90 | -1,86 | 0,00511 | ---             | ---      |           |
| 8131515 | -0,62 | -1,54 | 0,08605 | -0,88 | -1,84 | 0,00017 | ---             | SEMA5B   |           |
| 8090044 | -0,62 | -1,54 | 0,14373 | -0,98 | -1,97 | 0,01706 | NM_001031702    |          | ---       |
| 7922389 | -0,62 | -1,54 | 0,08383 | -1,93 | -3,80 | 0,00019 | ---             | ---      |           |

|         |       |       |         |       |       |         |               |          |           |
|---------|-------|-------|---------|-------|-------|---------|---------------|----------|-----------|
| 7927852 | -0,62 | -1,54 | 0,16531 | -1,47 | -2,76 | 0,00184 | ---           | TDRD9    |           |
| 7977161 | -0,62 | -1,54 | 0,03365 | -0,77 | -1,71 | 0,00728 | NM_153046     |          | C9orf131  |
| 8154973 | -0,62 | -1,54 | 0,18705 | -1,39 | -2,63 | 0,00468 | NM_203299     |          | ---       |
| 7969202 | -0,62 | -1,54 | 0,00033 | -1,01 | -2,02 | 0,14102 | ---           | ---      |           |
| 8040528 | -0,62 | -1,54 | 0,01133 | -0,64 | -1,55 | 0,00162 | ---           | CXCL5    |           |
| 8100977 | -0,62 | -1,54 | 0,18967 | -1,04 | -2,06 | 0,04034 | NM_002994     |          | SNORD83A  |
| 8076221 | -0,62 | -1,54 | 0,11565 | -1,62 | -3,07 | 0,00048 | NR_000027     |          | MCM4      |
| 8146357 | -0,62 | -1,54 | 0,40917 | 2,61  | 6,09  | 0,00000 | NM_005914     |          | OGG1      |
| 8077635 | -0,62 | -1,54 | 0,02529 | 0,78  | 1,71  | 0,03597 | NM_016819     |          | KIAA1239  |
| 8094542 | -0,62 | -1,54 | 0,18841 | -0,62 | -1,54 | 0,05691 | NM_001144990  |          | CXCR1     |
| 8058905 | -0,62 | -1,54 | 0,08319 | -1,03 | -2,04 | 0,02030 | NM_000634     |          | NHSL2     |
| 8168359 | -0,62 | -1,54 | 0,30108 | -0,64 | -1,56 | 0,10468 | NM_001013627  |          | STK11     |
| 8024204 | -0,62 | -1,54 | 0,01778 | 0,56  | 1,47  | 0,12554 | NM_000455     |          | MOCOS1    |
| 8126214 | -0,62 | -1,54 | 0,26573 | -0,26 | -1,20 | 0,26441 | NM_005943     |          | ---       |
| 8081030 | -0,62 | -1,54 | 0,29029 | -1,21 | -2,31 | 0,00150 | ---           | ---      |           |
| 8099082 | -0,62 | -1,54 | 0,27708 | -0,98 | -1,98 | 0,03681 | ---           | WDR16    |           |
| 8004889 | -0,62 | -1,54 | 0,05857 | -0,89 | -1,86 | 0,02772 | NM_145054     |          | ---       |
| 8110880 | -0,62 | -1,54 | 0,17919 | -0,84 | -1,79 | 0,01408 | ---           | ---      |           |
| 8133002 | -0,62 | -1,54 | 0,17919 | -0,84 | -1,79 | 0,01408 | ---           | TBC1D3F  |           |
| 8014603 | -0,62 | -1,54 | 0,34131 | 1,24  | 2,35  | 0,06290 | NM_032258     |          | TRIM36    |
| 8113577 | -0,62 | -1,54 | 0,07909 | -0,54 | -1,45 | 0,23250 | NM_018700     |          | ---       |
| 8121943 | -0,62 | -1,54 | 0,10384 | -1,33 | -2,52 | 0,00217 | ---           | SLC22A18 |           |
| 7937852 | -0,62 | -1,54 | 0,03594 | 0,25  | 1,19  | 0,50504 | NM_002555     |          | RGS22     |
| 8151999 | -0,62 | -1,54 | 0,02408 | -1,33 | -2,51 | 0,00696 | NM_015668     |          | ZNF79     |
| 8158022 | -0,62 | -1,54 | 0,16151 | 0,26  | 1,20  | 0,35543 | NM_007135     |          | FAM3B     |
| 8068684 | -0,62 | -1,54 | 0,05358 | 0,10  | 1,07  | 0,55740 | NM_058186     |          | ---       |
| 8133200 | -0,62 | -1,54 | 0,06660 | -1,38 | -2,60 | 0,00670 | ---           | FGF20    |           |
| 8149465 | -0,62 | -1,54 | 0,05133 | -0,27 | -1,20 | 0,01386 | NM_019851     |          | FAM131A   |
| 8084478 | -0,62 | -1,54 | 0,06846 | -0,08 | -1,06 | 0,74895 | NM_001171093  |          | ---       |
| 8083144 | -0,62 | -1,54 | 0,04378 | -0,71 | -1,64 | 0,01156 | ---           | TRIM31   |           |
| 8178330 | -0,62 | -1,54 | 0,17731 | -1,00 | -1,99 | 0,08119 | NM_007028     |          | ---       |
| 8040576 | -0,62 | -1,54 | 0,05443 | -0,49 | -1,41 | 0,05630 | ---           | CDK11A   |           |
| 7911578 | -0,62 | -1,54 | 0,37349 | -0,73 | -1,66 | 0,28902 | NM_024011     |          | FBXL18    |
| 8137964 | -0,62 | -1,54 | 0,18238 | -0,92 | -1,90 | 0,10813 | NM_024963     |          | C9orf114  |
| 8164481 | -0,62 | -1,54 | 0,00954 | 1,45  | 2,73  | 0,08316 | NM_016390     |          | KCNH5     |
| 7979529 | -0,62 | -1,54 | 0,17265 | -0,78 | -1,71 | 0,01335 | NM_139318     |          | MS4A13    |
| 7940307 | -0,62 | -1,54 | 0,01625 | -0,74 | -1,68 | 0,02192 | NM_001012417  |          | ---       |
| 8157841 | -0,62 | -1,54 | 0,06006 | -1,49 | -2,80 | 0,00618 | ---           | TNF      |           |
| 8118142 | -0,62 | -1,54 | 0,23541 | -1,96 | -3,89 | 0,00481 | NM_000594     |          | TNF       |
| 8177983 | -0,62 | -1,54 | 0,23541 | -1,96 | -3,89 | 0,00481 | NM_000594     |          | TNF       |
| 8179263 | -0,62 | -1,54 | 0,23541 | -1,96 | -3,89 | 0,00481 | NM_000594     |          | ITPR3     |
| 8118734 | -0,62 | -1,54 | 0,00592 | 4,38  | 20,89 | 0,00065 | NM_002224     |          | RPL23AP64 |
| 7952126 | -0,62 | -1,54 | 0,35578 | -0,46 | -1,37 | 0,07764 | NR_003040     |          | ---       |
| 7916341 | -0,62 | -1,54 | 0,12768 | -0,63 | -1,55 | 0,01332 | ---           | ---      |           |
| 7963201 | -0,62 | -1,54 | 0,01558 | -0,64 | -1,56 | 0,02263 | ---           | MIR153-1 |           |
| 8059211 | -0,62 | -1,54 | 0,02703 | -0,48 | -1,39 | 0,00576 | NR_029688     |          | ARAP2     |
| 8099760 | -0,62 | -1,54 | 0,03703 | 1,57  | 2,97  | 0,00259 | NM_015230     |          | EMR3      |
| 8034851 | -0,62 | -1,54 | 0,03639 | -1,05 | -2,07 | 0,00373 | NM_032571     |          | RNF208    |
| 8165492 | -0,62 | -1,54 | 0,11458 | -0,08 | -1,06 | 0,85852 | NM_031297     |          | RNF208    |
| 8165637 | -0,62 | -1,54 | 0,11458 | -0,08 | -1,06 | 0,85852 | NM_031297     |          | ---       |
| 7976059 | -0,62 | -1,54 | 0,03286 | -1,02 | -2,03 | 0,02249 | ---           | HGD      |           |
| 8089851 | -0,62 | -1,54 | 0,21700 | -0,59 | -1,51 | 0,04791 | NM_000187     |          | HGD       |
| 8093278 | -0,62 | -1,54 | 0,21700 | -0,59 | -1,51 | 0,04791 | NM_000187     |          | PXDNL     |
| 8150704 | -0,62 | -1,54 | 0,15897 | -1,04 | -2,06 | 0,00651 | NM_144651     |          | TSHR      |
| 7976037 | -0,62 | -1,54 | 0,02148 | -1,05 | -2,07 | 0,00286 | NM_000369     |          | KRT16     |
| 8015376 | -0,62 | -1,54 | 0,17731 | -0,95 | -1,94 | 0,30661 | NM_005557     |          | RBM11     |
| 8067869 | -0,62 | -1,54 | 0,07337 | 0,95  | 1,93  | 0,15831 | NM_144770     |          | GAA       |
| 8010354 | -0,62 | -1,54 | 0,19437 | 1,30  | 2,46  | 0,13684 | NM_000152     |          | C21orf62  |
| 8070073 | -0,62 | -1,54 | 0,00382 | -0,43 | -1,35 | 0,00148 | NM_001162495  |          | TSEN54    |
| 8009832 | -0,62 | -1,54 | 0,00311 | 1,06  | 2,08  | 0,07954 | NM_207346     |          | PDGFA     |
| 8130997 | -0,62 | -1,54 | 0,31234 | -1,70 | -3,26 | 0,00512 | BC109246 DMWD |          |           |
| 8037679 | -0,62 | -1,54 | 0,15292 | 0,60  | 1,51  | 0,19889 | NM_004943     |          | ---       |
| 8020025 | -0,62 | -1,54 | 0,30216 | -0,13 | -1,09 | 0,61563 | ---           | CACYBP   |           |
| 7907537 | -0,62 | -1,54 | 0,13979 | -0,25 | -1,19 | 0,20673 | NM_014412     |          | ---       |
| 8171032 | -0,62 | -1,54 | 0,09123 | -1,43 | -2,69 | 0,00503 | ---           | ---      |           |
| 8176243 | -0,62 | -1,54 | 0,09123 | -1,43 | -2,69 | 0,00503 | ---           | ---      |           |
| 8093037 | -0,62 | -1,54 | 0,04521 | -1,33 | -2,51 | 0,03614 | ---           | MYOT     |           |
| 8108256 | -0,63 | -1,54 | 0,02049 | -0,90 | -1,87 | 0,02776 | NM_006790     |          | C7orf57   |
| 8132715 | -0,63 | -1,54 | 0,16743 | -1,15 | -2,21 | 0,00241 | NM_001100159  |          | ---       |
| 7911092 | -0,63 | -1,54 | 0,32094 | -0,05 | -1,04 | 0,90653 | ---           | ---      |           |
| 8152863 | -0,63 | -1,54 | 0,16225 | -1,07 | -2,10 | 0,01170 | ---           | CLDN15   |           |
| 8141708 | -0,63 | -1,54 | 0,10609 | -0,22 | -1,17 | 0,64490 | NM_014343     |          | HKDC1     |
| 7927998 | -0,63 | -1,54 | 0,34368 | 0,34  | 1,27  | 0,33292 | NM_025130     |          | ZBED1     |



|         |       |       |         |       |       |         |              |               |
|---------|-------|-------|---------|-------|-------|---------|--------------|---------------|
| 8171139 | -0,63 | -1,54 | 0,09265 | 0,19  | 1,14  | 0,64939 | NM_001171136 | ZBED1         |
| 8177029 | -0,63 | -1,54 | 0,09265 | 0,19  | 1,14  | 0,64939 | NM_001171136 | OMG           |
| 8014057 | -0,63 | -1,54 | 0,03947 | -0,90 | -1,87 | 0,00227 | NM_002544    | ---           |
| 8047690 | -0,63 | -1,54 | 0,00359 | -0,85 | -1,80 | 0,00024 | ---          | OSM           |
| 8075316 | -0,63 | -1,54 | 0,22912 | -1,08 | -2,11 | 0,01787 | NM_020530    | ---           |
| 8088126 | -0,63 | -1,54 | 0,00820 | -1,14 | -2,20 | 0,00444 | ---          | GJB2          |
| 7970441 | -0,63 | -1,54 | 0,06602 | -0,39 | -1,31 | 0,42701 | NM_004004    | DIRAS3        |
| 7916853 | -0,63 | -1,54 | 0,06417 | -0,77 | -1,71 | 0,09898 | NM_004675    | TMEM37        |
| 8044813 | -0,63 | -1,54 | 0,30667 | -0,29 | -1,23 | 0,07838 | NM_183240    | TRIM31        |
| 8124707 | -0,63 | -1,54 | 0,16987 | -1,11 | -2,16 | 0,05813 | NM_007028    | SPATA2        |
| 8066953 | -0,63 | -1,54 | 0,11675 | 1,83  | 3,55  | 0,00451 | NM_006038    | ZC3H12A       |
| 7900146 | -0,63 | -1,54 | 0,15027 | -0,10 | -1,07 | 0,56778 | NM_025079    | VSIG1         |
| 8169263 | -0,63 | -1,54 | 0,19848 | -0,75 | -1,68 | 0,21741 | NM_001170553 | RGL2          |
| 8125687 | -0,63 | -1,54 | 0,09068 | 0,90  | 1,87  | 0,20176 | NM_004761    | ---           |
| 7934318 | -0,63 | -1,54 | 0,19565 | -1,90 | -3,72 | 0,00000 | ---          | TMEM225       |
| 7952377 | -0,63 | -1,54 | 0,23852 | -1,16 | -2,23 | 0,00088 | NM_001013743 | ---           |
| 8022102 | -0,63 | -1,54 | 0,01174 | -0,73 | -1,66 | 0,00045 | ---          | EDN3          |
| 8063729 | -0,63 | -1,54 | 0,08417 | -1,21 | -2,31 | 0,00026 | NM_207032    | KCNG3         |
| 8051785 | -0,63 | -1,54 | 0,15737 | 0,00  | -1,00 | 0,99847 | NM_133329    | RRERG         |
| 7961540 | -0,63 | -1,54 | 0,02687 | -0,67 | -1,59 | 0,01772 | NM_032918    | ---           |
| 8069610 | -0,63 | -1,54 | 0,32817 | -1,06 | -2,09 | 0,00723 | ---          | ZNF30         |
| 8027692 | -0,63 | -1,54 | 0,04666 | 0,90  | 1,86  | 0,04908 | NR_024018    | TUBB8         |
| 7931674 | -0,63 | -1,54 | 0,17621 | -1,41 | -2,67 | 0,16009 | NM_177987    | C17orf50      |
| 8006569 | -0,63 | -1,55 | 0,12309 | -0,73 | -1,66 | 0,01172 | NM_145272    | PCDHB8        |
| 8108713 | -0,63 | -1,55 | 0,20774 | -0,49 | -1,40 | 0,38463 | NM_019120    | ---           |
| 7994341 | -0,63 | -1,55 | 0,01472 | -0,58 | -1,49 | 0,07593 | ---          | ---           |
| 7989832 | -0,63 | -1,55 | 0,11457 | -0,64 | -1,56 | 0,00111 | ---          | ---           |
| 8046520 | -0,63 | -1,55 | 0,04753 | -0,96 | -1,95 | 0,05635 | ---          | ---           |
| 8146525 | -0,63 | -1,55 | 0,20472 | -1,42 | -2,68 | 0,00604 | ---          | HFM1          |
| 7917612 | -0,63 | -1,55 | 0,01724 | -0,75 | -1,68 | 0,08142 | NM_001017975 | GOLGA6B       |
| 7984662 | -0,63 | -1,55 | 0,33486 | -0,81 | -1,75 | 0,04151 | NM_018652    | ---           |
| 8008868 | -0,63 | -1,55 | 0,31761 | -1,43 | -2,69 | 0,03255 | ---          | ---           |
| 7948369 | -0,63 | -1,55 | 0,04840 | -1,66 | -3,16 | 0,01798 | ---          | ---           |
| 8121884 | -0,63 | -1,55 | 0,24547 | -1,50 | -2,82 | 0,01367 | ---          | KRT2          |
| 7963479 | -0,63 | -1,55 | 0,01948 | -0,33 | -1,25 | 0,11171 | NM_000423    | DGCR6L        |
| 8074565 | -0,63 | -1,55 | 0,13204 | 0,98  | 1,97  | 0,08443 | NM_033257    | NECAB2        |
| 7997542 | -0,63 | -1,55 | 0,36924 | -0,35 | -1,27 | 0,28653 | NM_019065    | ---           |
| 8104070 | -0,63 | -1,55 | 0,02723 | -0,15 | -1,11 | 0,41790 | ---          | BMS1P4        |
| 7927550 | -0,63 | -1,55 | 0,00852 | -0,86 | -1,81 | 0,01585 | NR_026592    | FLJ42842      |
| 8008540 | -0,63 | -1,55 | 0,36401 | -1,19 | -2,28 | 0,12886 | AK124832     | ---           |
| 8132845 | -0,63 | -1,55 | 0,10136 | -1,36 | -2,56 | 0,03725 | ---          | ---           |
| 7979802 | -0,63 | -1,55 | 0,02181 | -1,17 | -2,24 | 0,01236 | ---          | RPRD1B        |
| 8062433 | -0,63 | -1,55 | 0,16675 | 1,27  | 2,41  | 0,08634 | NM_021215    | LRRTM3        |
| 7927803 | -0,63 | -1,55 | 0,16129 | -0,98 | -1,98 | 0,01129 | NM_178011    | SERPINA11     |
| 7981078 | -0,63 | -1,55 | 0,11575 | -1,03 | -2,04 | 0,01460 | NM_001080451 | ---           |
| 8047337 | -0,63 | -1,55 | 0,21843 | -0,99 | -1,99 | 0,00805 | ---          | ---           |
| 8101585 | -0,63 | -1,55 | 0,08210 | -1,01 | -2,01 | 0,21574 | ---          | TTC6          |
| 7974029 | -0,63 | -1,55 | 0,03701 | -0,21 | -1,16 | 0,36420 | BC103915     | TNKS1BP1      |
| 7948176 | -0,63 | -1,55 | 0,04647 | -0,08 | -1,06 | 0,72386 | NM_033396    | ANKRD20B      |
| 8053741 | -0,63 | -1,55 | 0,39905 | -0,91 | -1,88 | 0,08861 | NR_003366    | ---           |
| 7985257 | -0,63 | -1,55 | 0,05287 | -0,95 | -1,93 | 0,01274 | ---          | GADL1         |
| 8085972 | -0,63 | -1,55 | 0,00052 | -1,15 | -2,21 | 0,01344 | NM_207359    | LYPLA2        |
| 8033458 | -0,63 | -1,55 | 0,53925 | 0,76  | 1,70  | 0,18265 | NM_007260    | TYR           |
| 7942991 | -0,63 | -1,55 | 0,00293 | -1,01 | -2,02 | 0,02854 | NM_000372    | ---           |
| 7902439 | -0,63 | -1,55 | 0,15979 | -0,99 | -1,99 | 0,01442 | ---          | ADAMDEC1      |
| 8145317 | -0,63 | -1,55 | 0,09259 | -0,76 | -1,69 | 0,00033 | NM_014479    | ---           |
| 7932788 | -0,63 | -1,55 | 0,15889 | -0,92 | -1,89 | 0,04979 | ---          | ESRRA         |
| 7940989 | -0,63 | -1,55 | 0,21673 | -1,24 | -2,36 | 0,12334 | NM_004451    | SNORD114-2    |
| 7976814 | -0,63 | -1,55 | 0,16869 | -0,94 | -1,92 | 0,00511 | NR_003194    | THAP5         |
| 8142324 | -0,63 | -1,55 | 0,38420 | -0,24 | -1,18 | 0,71638 | NM_001130475 | HSD17B13      |
| 8101637 | -0,63 | -1,55 | 0,13301 | -0,86 | -1,81 | 0,01326 | NM_178135    | GCK           |
| 8139314 | -0,63 | -1,55 | 0,12098 | -0,73 | -1,66 | 0,04267 | NM_033508    | HLA-DRA       |
| 8178193 | -0,63 | -1,55 | 0,04701 | 1,56  | 2,95  | 0,02184 | NM_019111    | GCDH          |
| 8026090 | -0,63 | -1,55 | 0,09228 | 0,27  | 1,21  | 0,41126 | NM_000159    | DKFZP434I0714 |
| 8097811 | -0,63 | -1,55 | 0,09186 | -1,32 | -2,49 | 0,01439 | AL137273     | LYZL6         |
| 8014334 | -0,63 | -1,55 | 0,18908 | -1,08 | -2,11 | 0,00212 | NM_020426    | KLHL26        |
| 8027049 | -0,63 | -1,55 | 0,04992 | 0,43  | 1,35  | 0,12444 | NM_018316    | OSCAR         |
| 8039120 | -0,63 | -1,55 | 0,07786 | -1,46 | -2,76 | 0,01294 | NM_206818    | ARHGEF5       |
| 8143610 | -0,63 | -1,55 | 0,06819 | 1,64  | 3,12  | 0,00269 | NM_005435    | TEKT2         |
| 7900076 | -0,63 | -1,55 | 0,02262 | -0,90 | -1,86 | 0,02345 | NM_014466    | ZNF434        |
| 7992895 | -0,63 | -1,55 | 0,01682 | -1,33 | -2,51 | 0,00480 | NM_017810    | ---           |
| 7945156 | -0,63 | -1,55 | 0,21468 | -0,79 | -1,73 | 0,00371 | ---          | CLIP2         |
| 8133459 | -0,63 | -1,55 | 0,06585 | -0,59 | -1,51 | 0,05127 | NM_003388    | CCDC60        |

|         |       |       |         |       |       |         |                 |             |
|---------|-------|-------|---------|-------|-------|---------|-----------------|-------------|
| 7959108 | -0,63 | -1,55 | 0,08866 | -0,67 | -1,59 | 0,03477 | NM_178499       | DSCAML1     |
| 7951928 | -0,63 | -1,55 | 0,13810 | -0,93 | -1,91 | 0,01574 | NM_020693       | ---         |
| 8152819 | -0,63 | -1,55 | 0,04450 | -0,61 | -1,52 | 0,04638 | ---             | ASRGL1      |
| 7940643 | -0,63 | -1,55 | 0,25637 | 1,08  | 2,12  | 0,00339 | NM_001083926    | ---         |
| 8113342 | -0,63 | -1,55 | 0,03423 | -1,01 | -2,01 | 0,00544 | ---             | hCG_1659830 |
| 8023596 | -0,63 | -1,55 | 0,19532 | -0,58 | -1,50 | 0,13331 | ENST00000426779 | ---         |
| 7967868 | -0,63 | -1,55 | 0,03621 | -0,72 | -1,65 | 0,02702 | ---             | OR12D2      |
| 8117724 | -0,63 | -1,55 | 0,25336 | -0,88 | -1,84 | 0,04995 | NM_013936       | NMS         |
| 8043890 | -0,63 | -1,55 | 0,19897 | -0,77 | -1,70 | 0,09252 | NM_001011717    | IFNGR1      |
| 8122261 | -0,63 | -1,55 | 0,13783 | -1,63 | -3,10 | 0,01229 | NM_000416       | ---         |
| 8053574 | -0,63 | -1,55 | 0,06201 | -1,16 | -2,24 | 0,08740 | ---             | ---         |
| 8036993 | -0,63 | -1,55 | 0,18804 | -1,65 | -3,13 | 0,00333 | ---             | AMDHD1      |
| 7957654 | -0,63 | -1,55 | 0,05668 | -0,39 | -1,31 | 0,35420 | NM_152435       | OR4F15      |
| 7986532 | -0,63 | -1,55 | 0,24881 | -1,24 | -2,37 | 0,00038 | NM_001001674    | ---         |
| 8169361 | -0,63 | -1,55 | 0,22375 | -0,78 | -1,71 | 0,07734 | ---             | SNRPN       |
| 7981945 | -0,63 | -1,55 | 0,06476 | -0,62 | -1,54 | 0,03670 | AB061718 CTXN3  |             |
| 8107764 | -0,63 | -1,55 | 0,17585 | -0,76 | -1,70 | 0,08955 | NM_001048252    | TMEM158     |
| 8086530 | -0,63 | -1,55 | 0,11902 | -1,45 | -2,74 | 0,00551 | NM_015444       | CXorf41     |
| 8169221 | -0,63 | -1,55 | 0,01248 | -0,56 | -1,48 | 0,00032 | NM_001169154    | RASGRF1     |
| 7990774 | -0,63 | -1,55 | 0,04858 | -0,88 | -1,84 | 0,00221 | NM_002891       | MIRS16B2    |
| 8031031 | -0,63 | -1,55 | 0,04440 | -0,94 | -1,92 | 0,00541 | NR_030207       | ---         |
| 7966688 | -0,63 | -1,55 | 0,24230 | -1,19 | -2,28 | 0,04442 | ---             | GOLGA8G     |
| 7982131 | -0,63 | -1,55 | 0,15449 | -0,67 | -1,59 | 0,23928 | NR_033353       | GOLGA8G     |
| 7986922 | -0,63 | -1,55 | 0,15449 | -0,67 | -1,59 | 0,23928 | NR_033353       | ---         |
| 8115828 | -0,63 | -1,55 | 0,00667 | -0,97 | -1,95 | 0,03799 | ---             | ---         |
| 8167038 | -0,63 | -1,55 | 0,06435 | -1,56 | -2,94 | 0,01454 | ---             | ---         |
| 7968913 | -0,63 | -1,55 | 0,21609 | -0,63 | -1,55 | 0,24312 | ---             | OR2M7       |
| 7925745 | -0,63 | -1,55 | 0,07066 | -1,01 | -2,02 | 0,01462 | NM_001004691    | ---         |
| 8020971 | -0,63 | -1,55 | 0,08781 | -0,77 | -1,70 | 0,08291 | ---             | ZNF513      |
| 8051113 | -0,63 | -1,55 | 0,15705 | -0,39 | -1,31 | 0,42399 | NM_144631       | LOC253724   |
| 7965935 | -0,63 | -1,55 | 0,19396 | -0,70 | -1,62 | 0,04489 | NR_027249       | ITGB2       |
| 8070826 | -0,63 | -1,55 | 0,18776 | 0,67  | 1,59  | 0,09441 | NM_000211       | RGR         |
| 7928789 | -0,63 | -1,55 | 0,08670 | -1,32 | -2,49 | 0,01143 | NM_002921       | ---         |
| 7994824 | -0,63 | -1,55 | 0,50357 | -0,65 | -1,57 | 0,04361 | ---             | ---         |
| 8056790 | -0,63 | -1,55 | 0,13770 | -1,83 | -3,56 | 0,01839 | ---             | KLB         |
| 8094679 | -0,63 | -1,55 | 0,08173 | 1,27  | 2,41  | 0,12681 | NM_175737       | PDZD7       |
| 7935834 | -0,63 | -1,55 | 0,28865 | -1,45 | -2,74 | 0,00377 | NM_024895       | BGLAP       |
| 7906140 | -0,63 | -1,55 | 0,34251 | 1,96  | 3,89  | 0,00424 | NM_199173       | NEU2        |
| 8049243 | -0,63 | -1,55 | 0,13905 | -1,79 | -3,46 | 0,00068 | NM_005383       | GNG2        |
| 7979131 | -0,63 | -1,55 | 0,16445 | -0,73 | -1,66 | 0,12302 | NM_053064       | DAPL1       |
| 8045882 | -0,63 | -1,55 | 0,08723 | -0,94 | -1,92 | 0,06951 | NM_001017920    | GOLGA6B     |
| 7984961 | -0,63 | -1,55 | 0,37323 | -0,93 | -1,90 | 0,00298 | NM_018652       | LRRN4CL     |
| 7948794 | -0,63 | -1,55 | 0,19172 | -2,25 | -4,77 | 0,01009 | NM_203422       | TPRG1       |
| 8084757 | -0,63 | -1,55 | 0,11804 | 0,44  | 1,36  | 0,28521 | NM_198485       | RHOT2       |
| 7991989 | -0,63 | -1,55 | 0,03218 | 0,11  | 1,08  | 0,75197 | NM_138769       | TCEAL2      |
| 8168892 | -0,64 | -1,55 | 0,08455 | -0,84 | -1,79 | 0,11789 | NM_080390       | WFIKK2      |
| 8008511 | -0,64 | -1,55 | 0,31140 | -1,68 | -3,21 | 0,02425 | NM_175575       | MAGEA11     |
| 8175629 | -0,64 | -1,55 | 0,20612 | -1,07 | -2,10 | 0,04582 | NM_001011544    | TAS2R5      |
| 8136647 | -0,64 | -1,55 | 0,03303 | -0,08 | -1,06 | 0,65597 | NM_018980       | ---         |
| 8055909 | -0,64 | -1,55 | 0,39332 | -1,46 | -2,75 | 0,01192 | ---             | PLA2G3      |
| 8075468 | -0,64 | -1,55 | 0,18796 | -0,49 | -1,40 | 0,28039 | NM_015715       | GAS2        |
| 7938989 | -0,64 | -1,55 | 0,08333 | -1,34 | -2,52 | 0,00096 | NM_005256       | CTAGE4      |
| 8136979 | -0,64 | -1,55 | 0,14587 | -0,36 | -1,29 | 0,00791 | NM_198495       | SPATA4      |
| 8103802 | -0,64 | -1,55 | 0,01043 | -0,80 | -1,74 | 0,03674 | NM_144644       | SNORA2B     |
| 7962829 | -0,64 | -1,55 | 0,13447 | -0,66 | -1,58 | 0,05891 | NR_002951       | OR4C5       |
| 7948042 | -0,64 | -1,55 | 0,16928 | -0,98 | -1,98 | 0,00124 | ENST00000319813 | C10orf72    |
| 7933488 | -0,64 | -1,55 | 0,07909 | -0,93 | -1,91 | 0,12433 | NM_001031746    | TMEM160     |
| 8037853 | -0,64 | -1,55 | 0,26347 | -0,13 | -1,09 | 0,71082 | NM_017854       | COL4A4      |
| 8059477 | -0,64 | -1,55 | 0,07101 | -1,25 | -2,38 | 0,00118 | NM_000092       | IL2RA       |
| 7931914 | -0,64 | -1,55 | 0,13310 | -1,52 | -2,86 | 0,00045 | NM_000417       | SLC2A2      |
| 8092083 | -0,64 | -1,55 | 0,17174 | -0,41 | -1,33 | 0,01208 | NM_000340       | OR5H14      |
| 8081196 | -0,64 | -1,55 | 0,12370 | -0,94 | -1,92 | 0,00030 | NM_001005514    | LG1         |
| 7929373 | -0,64 | -1,55 | 0,03353 | -1,37 | -2,59 | 0,00571 | NM_005097       | SPRR2G      |
| 7920217 | -0,64 | -1,55 | 0,53675 | -2,75 | -6,73 | 0,00126 | NM_001014291    | ---         |
| 8104648 | -0,64 | -1,55 | 0,06639 | -1,28 | -2,44 | 0,00235 | ---             | ADAP2       |
| 8006214 | -0,64 | -1,56 | 0,08209 | 0,77  | 1,71  | 0,26460 | NM_018404       | ---         |
| 7923905 | -0,64 | -1,56 | 0,03030 | -1,66 | -3,17 | 0,01053 | ---             | FAM58A      |
| 8175811 | -0,64 | -1,56 | 0,21224 | -1,37 | -2,58 | 0,04812 | NM_152274       | ---         |
| 8042694 | -0,64 | -1,56 | 0,00236 | -1,54 | -2,90 | 0,01091 | ---             | LRRC19      |
| 8160504 | -0,64 | -1,56 | 0,01641 | -1,15 | -2,23 | 0,00055 | NM_022901       | ---         |
| 7991182 | -0,64 | -1,56 | 0,01303 | -0,14 | -1,10 | 0,09471 | ---             | DNHD1       |
| 7938133 | -0,64 | -1,56 | 0,13508 | -0,30 | -1,23 | 0,33556 | NM_144666       | OR5A1       |
| 7940173 | -0,64 | -1,56 | 0,12668 | -2,37 | -5,15 | 0,00948 | NM_001004728    | ANKRD20A1   |

|         |       |       |         |       |       |         |                 |          |
|---------|-------|-------|---------|-------|-------|---------|-----------------|----------|
| 8155574 | -0,64 | -1,56 | 0,29209 | -0,62 | -1,54 | 0,03100 | NM_032250       | ---      |
| 7958015 | -0,64 | -1,56 | 0,19152 | -1,66 | -3,17 | 0,00301 | ---             | CXCL13   |
| 8095886 | -0,64 | -1,56 | 0,04783 | -0,78 | -1,72 | 0,00272 | NM_006419       | CCDC144C |
| 8005679 | -0,64 | -1,56 | 0,36217 | 0,53  | 1,44  | 0,19734 | NR_023380       | BAT4     |
| 8124998 | -0,64 | -1,56 | 0,21496 | -0,16 | -1,12 | 0,70213 | NM_033177       | SLC25A25 |
| 8158147 | -0,64 | -1,56 | 0,10260 | 0,15  | 1,11  | 0,72224 | NM_052901       | C10orf2  |
| 7929901 | -0,64 | -1,56 | 0,04421 | 1,74  | 3,34  | 0,00563 | NM_001163812    | LCN8     |
| 8165285 | -0,64 | -1,56 | 0,20343 | -1,24 | -2,36 | 0,01811 | NM_178469       | ---      |
| 8151784 | -0,64 | -1,56 | 0,13195 | -0,73 | -1,66 | 0,00854 | ---             | SOHLH1   |
| 8165038 | -0,64 | -1,56 | 0,10101 | -0,65 | -1,57 | 0,00806 | NM_001012415    | CGA      |
| 8128001 | -0,64 | -1,56 | 0,24602 | -0,90 | -1,87 | 0,08949 | NM_000735       | HCG9     |
| 8117809 | -0,64 | -1,56 | 0,01919 | -1,09 | -2,13 | 0,00081 | NR_028032       | HCG9     |
| 8177740 | -0,64 | -1,56 | 0,01919 | -1,09 | -2,13 | 0,00081 | NR_028032       | FAM19A4  |
| 8088671 | -0,64 | -1,56 | 0,04295 | -1,30 | -2,47 | 0,00506 | NM_182522       | TOR1AIP1 |
| 7922648 | -0,64 | -1,56 | 0,14807 | -0,98 | -1,97 | 0,00554 | NM_015602       | FCER1G   |
| 7906720 | -0,64 | -1,56 | 0,10255 | 0,00  | 1,00  | 0,99633 | NM_004106       | DDRKG1   |
| 8064601 | -0,64 | -1,56 | 0,17026 | 0,54  | 1,46  | 0,02344 | NM_023935       | C17orf68 |
| 8012423 | -0,64 | -1,56 | 0,05338 | 0,60  | 1,51  | 0,21986 | NM_025099       | TMPRSS2  |
| 8070467 | -0,64 | -1,56 | 0,00096 | -0,46 | -1,37 | 0,08080 | NM_001135099    | STON1    |
| 8041937 | -0,64 | -1,56 | 0,07588 | -0,69 | -1,61 | 0,04436 | ENST00000406226 | RRH      |
| 8096830 | -0,64 | -1,56 | 0,02259 | -0,55 | -1,46 | 0,00198 | NM_006583       | FLJ45964 |
| 8049667 | -0,64 | -1,56 | 0,22968 | -0,15 | -1,11 | 0,02755 | ENST00000358775 | ETV3     |
| 7921228 | -0,64 | -1,56 | 0,00566 | 0,10  | 1,07  | 0,89168 | NM_001145312    | ---      |
| 7966876 | -0,64 | -1,56 | 0,05565 | -1,02 | -2,02 | 0,00651 | ---             | ---      |
| 7926819 | -0,64 | -1,56 | 0,06188 | -1,48 | -2,79 | 0,00017 | ---             | ---      |
| 8162084 | -0,64 | -1,56 | 0,29521 | -0,58 | -1,50 | 0,05212 | ---             | MSX2P1   |
| 8008716 | -0,64 | -1,56 | 0,20403 | -0,93 | -1,91 | 0,14325 | NR_002307       | MMP26    |
| 7937961 | -0,64 | -1,56 | 0,07376 | -0,52 | -1,44 | 0,06747 | NM_021801       | PRO1768  |
| 7976148 | -0,64 | -1,56 | 0,13167 | -1,20 | -2,29 | 0,04994 | NR_024620       | ---      |
| 8065386 | -0,64 | -1,56 | 0,24072 | -0,91 | -1,88 | 0,00537 | ---             | CRYBB3   |
| 8071989 | -0,64 | -1,56 | 0,06558 | -1,64 | -3,11 | 0,00004 | NM_004076       | SEMG2    |
| 8062944 | -0,64 | -1,56 | 0,09245 | -1,16 | -2,23 | 0,01747 | NM_003008       | ---      |
| 8151430 | -0,64 | -1,56 | 0,19260 | -1,69 | -3,23 | 0,00208 | ---             | KRT24    |
| 8015060 | -0,64 | -1,56 | 0,29605 | -1,37 | -2,59 | 0,01547 | NM_019016       | SYTL1    |
| 7899323 | -0,64 | -1,56 | 0,14833 | -0,54 | -1,45 | 0,23375 | NM_032872       | ---      |
| 7991564 | -0,64 | -1,56 | 0,06458 | -0,75 | -1,68 | 0,01768 | ---             | ---      |
| 7982335 | -0,64 | -1,56 | 0,26546 | -1,68 | -3,21 | 0,01057 | ---             | ---      |
| 8146353 | -0,64 | -1,56 | 0,00043 | -0,69 | -1,61 | 0,00331 | ---             | C12orf42 |
| 7965900 | -0,64 | -1,56 | 0,07778 | -1,83 | -3,57 | 0,01975 | NM_001099336    | PIGR     |
| 7923929 | -0,64 | -1,56 | 0,13489 | -1,29 | -2,45 | 0,00029 | NM_002644       | ERN2     |
| 8000346 | -0,64 | -1,56 | 0,14437 | -1,62 | -3,07 | 0,00076 | NM_033266       | TCEB3CL  |
| 8023154 | -0,64 | -1,56 | 0,52111 | -2,14 | -4,41 | 0,00246 | NM_001100817    | CLCA4    |
| 7902738 | -0,64 | -1,56 | 0,10829 | -1,06 | -2,08 | 0,00344 | NM_012128       | C6orf154 |
| 8126566 | -0,64 | -1,56 | 0,31209 | -1,35 | -2,54 | 0,02675 | BC108661        | PRAMEF16 |
| 7898026 | -0,64 | -1,56 | 0,13075 | -1,53 | -2,89 | 0,01384 | NM_001045480    | KIF19    |
| 8018164 | -0,64 | -1,56 | 0,31643 | -0,76 | -1,70 | 0,09612 | BC093631        | ---      |
| 8110112 | -0,64 | -1,56 | 0,07550 | -0,78 | -1,72 | 0,00118 | ---             | AK7      |
| 7976578 | -0,64 | -1,56 | 0,02833 | -0,06 | -1,04 | 0,63259 | NM_152327       | AGAP11   |
| 7928890 | -0,64 | -1,56 | 0,04579 | -0,26 | -1,20 | 0,36623 | NM_133447       | C11orf35 |
| 7937404 | -0,64 | -1,56 | 0,03683 | -0,21 | -1,16 | 0,31565 | NM_173573       | CRH      |
| 8151092 | -0,64 | -1,56 | 0,32135 | -1,31 | -2,47 | 0,03352 | NM_000756       | TSSK2    |
| 8071196 | -0,64 | -1,56 | 0,13898 | -0,71 | -1,63 | 0,00602 | NM_053006       | PPM1J    |
| 7918606 | -0,64 | -1,56 | 0,13507 | 0,33  | 1,26  | 0,30377 | NM_005167       | C18orf26 |
| 8021297 | -0,64 | -1,56 | 0,13024 | -1,34 | -2,53 | 0,03954 | NM_173629       | ---      |
| 8173579 | -0,64 | -1,56 | 0,21185 | -0,75 | -1,68 | 0,11977 | ---             | ZBPB2    |
| 8006958 | -0,64 | -1,56 | 0,12177 | -0,92 | -1,89 | 0,00391 | NM_199321       | SH3GL3   |
| 7985507 | -0,64 | -1,56 | 0,06325 | -0,97 | -1,96 | 0,00061 | NR_026799       | GGT3P    |
| 8074716 | -0,64 | -1,56 | 0,05938 | -1,33 | -2,51 | 0,04255 | NR_003267       | BEGAIN   |
| 7981309 | -0,64 | -1,56 | 0,19157 | -0,26 | -1,19 | 0,14738 | NM_020836       | C3orf46  |
| 8082298 | -0,64 | -1,56 | 0,11453 | 0,19  | 1,14  | 0,51968 | BC042038        | SCARNA17 |
| 8021183 | -0,64 | -1,56 | 0,04976 | 0,22  | 1,17  | 0,00014 | NR_003003       | DHRS9    |
| 8046124 | -0,64 | -1,56 | 0,04286 | -0,76 | -1,69 | 0,08629 | NM_005771       | ---      |
| 7897683 | -0,64 | -1,56 | 0,06141 | -0,39 | -1,31 | 0,00804 | ---             | ENO3     |
| 8004043 | -0,64 | -1,56 | 0,16274 | -0,34 | -1,27 | 0,12107 | NM_001976       | GALNT6   |
| 7963313 | -0,64 | -1,56 | 0,04725 | 0,32  | 1,25  | 0,24754 | NM_007210       | FBXO41   |
| 8053009 | -0,64 | -1,56 | 0,08146 | -0,73 | -1,66 | 0,03971 | NM_001080410    | ZMIZ2    |
| 8132617 | -0,64 | -1,56 | 0,12165 | 1,00  | 2,00  | 0,05386 | NM_031449       | MSR1     |
| 8149448 | -0,64 | -1,56 | 0,12578 | -0,85 | -1,80 | 0,03464 | NM_002445       | HHATL    |
| 8086419 | -0,64 | -1,56 | 0,04305 | -1,21 | -2,31 | 0,08768 | NR_027753       | ---      |
| 8119856 | -0,64 | -1,56 | 0,02987 | -0,65 | -1,57 | 0,00967 | ---             | CSN1S2A  |
| 8095441 | -0,64 | -1,56 | 0,10955 | -0,50 | -1,42 | 0,04138 | NR_003720       | MRAP2    |
| 8120961 | -0,64 | -1,56 | 0,18234 | -0,58 | -1,49 | 0,01909 | NM_138409       | C13orf36 |
| 7968650 | -0,64 | -1,56 | 0,04806 | -1,51 | -2,84 | 0,00086 | NM_203451       | RHAG     |

|              |       |       |         |       |        |         |                        |           |
|--------------|-------|-------|---------|-------|--------|---------|------------------------|-----------|
| 8126878      | -0,64 | -1,56 | 0,19768 | -0,86 | -1,82  | 0,13411 | NM_000324              | WDR69     |
| 8048870      | -0,64 | -1,56 | 0,13613 | -0,33 | -1,25  | 0,02581 | NM_178821              | OR5W2     |
| 7948107      | -0,64 | -1,56 | 0,05731 | -1,54 | -2,90  | 0,00410 | NM_001001960           | ---       |
| 8107472      | -0,64 | -1,56 | 0,12290 | -1,47 | -2,77  | 0,00633 | --- CNGA3              | ---       |
| 8043782      | -0,64 | -1,56 | 0,32676 | -0,81 | -1,75  | 0,00182 | NM_001298              | C3orf57   |
| 8091799      | -0,64 | -1,56 | 0,03462 | -0,49 | -1,41  | 0,25128 | NM_001040100           | JOSD2     |
| 8038571      | -0,64 | -1,56 | 0,10659 | -0,83 | -1,77  | 0,03687 | NM_138334              | SRD5A2    |
| 8051361      | -0,64 | -1,56 | 0,08196 | -1,53 | -2,88  | 0,09356 | NM_000348              | ---       |
| 7939961      | -0,64 | -1,56 | 0,14714 | -1,00 | -2,00  | 0,02382 | --- LOC554174          | ---       |
| 8076744      | -0,64 | -1,56 | 0,12375 | -0,86 | -1,82  | 0,00628 | BC009388 COLQ          | ---       |
| 8085581      | -0,64 | -1,56 | 0,03342 | -0,56 | -1,48  | 0,21915 | NM_005677              | ---       |
| 8035080      | -0,64 | -1,56 | 0,03201 | -1,32 | -2,49  | 0,04711 | --- C6orf118           | ---       |
| 8130664      | -0,64 | -1,56 | 0,02265 | -0,71 | -1,64  | 0,01104 | NM_144980              | PIK3C2G   |
| 7954208      | -0,64 | -1,56 | 0,02175 | -0,44 | -1,36  | 0,05454 | NM_004570              | CWH43     |
| 8094988      | -0,64 | -1,56 | 0,20220 | -0,74 | -1,67  | 0,00996 | NM_025087              | ---       |
| 7940026      | -0,65 | -1,56 | 0,07629 | -1,32 | -2,49  | 0,01408 | --- SMCRC5             | ---       |
| 8013131      | -0,65 | -1,56 | 0,07596 | -1,41 | -2,65  | 0,01890 | NR_024007              | ---       |
| 7973082      | -0,65 | -1,56 | 0,49669 | -0,90 | -1,87  | 0,04984 | --- RASSF7             | ---       |
| 7937407      | -0,65 | -1,56 | 0,30563 | -1,03 | -2,04  | 0,07869 | NM_003475              | RXFP1     |
| 8098060      | -0,65 | -1,56 | 0,40899 | -0,83 | -1,78  | 0,00007 | NM_021634              | MICALL1   |
| 8072962      | -0,65 | -1,56 | 0,06377 | 0,42  | 1,34   | 0,24983 | NM_033386              | ---       |
| 8162311      | -0,65 | -1,56 | 0,06724 | -1,59 | -3,02  | 0,01711 | --- ADCK5              | ---       |
| 8148850      | -0,65 | -1,56 | 0,03625 | -0,23 | -1,17  | 0,60493 | NM_174922              | C10orf25  |
| 7933209      | -0,65 | -1,56 | 0,10894 | 0,16  | 1,12   | 0,26106 | NM_001039380           | ---       |
| 8127542      | -0,65 | -1,56 | 0,50839 | -0,92 | -1,90  | 0,00467 | --- PRG2               | ---       |
| 7948221      | -0,65 | -1,57 | 0,11465 | -1,06 | -2,08  | 0,00055 | NM_002728              | ---       |
| 8116992      | -0,65 | -1,57 | 0,01377 | -0,83 | -1,78  | 0,24750 | --- OR4D1              | ---       |
| 8008711      | -0,65 | -1,57 | 0,04835 | -1,37 | -2,58  | 0,04779 | NM_012374              | KCNA5     |
| 7953278      | -0,65 | -1,57 | 0,00039 | -1,48 | -2,79  | 0,06111 | NM_002234              | TSGA10IP  |
| 7941469      | -0,65 | -1,57 | 0,20626 | -1,12 | -2,17  | 0,00476 | NM_152762              | ABCB8     |
| 8137334      | -0,65 | -1,57 | 0,32945 | -0,97 | -1,95  | 0,04194 | NM_007188              | ---       |
| 8137046      | -0,65 | -1,57 | 0,33557 | -0,84 | -1,79  | 0,00494 | --- SLC27A2            | ---       |
| 7983650      | -0,65 | -1,57 | 0,17200 | 4,81  | 28,12  | 0,00003 | NM_003645              | OR51T1    |
| 7937979      | -0,65 | -1,57 | 0,08132 | -0,50 | -1,41  | 0,01249 | NM_001004759           | ---       |
| 8004859      | -0,65 | -1,57 | 0,04716 | -0,57 | -1,49  | 0,00481 | --- LOC100125556       | ---       |
| 8082254      | -0,65 | -1,57 | 0,12210 | 0,07  | 1,05   | 0,80114 | NR_024251              | ---       |
| 8170117      | -0,65 | -1,57 | 0,01237 | -0,30 | -1,23  | 0,02390 | --- PARP15             | ---       |
| 8082086      | -0,65 | -1,57 | 0,00084 | -0,94 | -1,92  | 0,00556 | NM_001113523           | ---       |
| 7985999      | -0,65 | -1,57 | 0,41422 | -1,31 | -2,48  | 0,00309 | --- UIMC1              | ---       |
| 7911343      | -0,65 | -1,57 | 0,48925 | -4,14 | -17,61 | 0,00382 | AF284753 UIMC1         | ---       |
| 8165703      | -0,65 | -1,57 | 0,48925 | -4,14 | -17,61 | 0,00382 | AF284753 WDR52         | ---       |
| 8089596      | -0,65 | -1,57 | 0,17648 | -0,43 | -1,35  | 0,36350 | NM_001164496           | LZTR1     |
| 8071466      | -0,65 | -1,57 | 0,21325 | 1,30  | 2,45   | 0,01100 | NM_006767              | ---       |
| 8148018      | -0,65 | -1,57 | 0,11675 | -1,23 | -2,34  | 0,00072 | --- FLJ25996           | ---       |
| 8084923      | -0,65 | -1,57 | 0,03788 | -2,22 | -4,65  | 0,00001 | BC151150               | ---       |
| 8098261      | -0,65 | -1,57 | 0,12447 | -0,71 | -1,64  | 0,05590 | --- TAS2R43 // TAS2R43 | ---       |
| 7961295      | -0,65 | -1,57 | 0,04838 | -1,01 | -2,02  | 0,01283 | NM_176884 // NM_176884 | ---       |
| LOC100130269 |       |       |         |       |        |         |                        |           |
| 8072603      | -0,65 | -1,57 | 0,09128 | -0,21 | -1,16  | 0,02213 | ENST00000414283        | FOLR1     |
| 7942332      | -0,65 | -1,57 | 0,14168 | 0,11  | 1,08   | 0,65750 | NM_016724              | KCNJ8     |
| 7961702      | -0,65 | -1,57 | 0,19809 | -0,74 | -1,67  | 0,00588 | NM_004982              | ---       |
| 8073293      | -0,65 | -1,57 | 0,22869 | -0,48 | -1,40  | 0,00461 | --- MIR23A             | ---       |
| 8034698      | -0,65 | -1,57 | 0,01464 | -0,81 | -1,76  | 0,06429 | NR_029495              | RDH16     |
| 7964292      | -0,65 | -1,57 | 0,02026 | -1,34 | -2,54  | 0,03056 | NM_003708              | THRSF     |
| 7942793      | -0,65 | -1,57 | 0,15332 | -1,02 | -2,02  | 0,00087 | NM_003251              | MYH2      |
| 8012753      | -0,65 | -1,57 | 0,00670 | -0,95 | -1,93  | 0,00206 | NM_017534              | RGS13     |
| 7908397      | -0,65 | -1,57 | 0,01203 | -0,92 | -1,89  | 0,02527 | NM_002927              | ---       |
| 8149809      | -0,65 | -1,57 | 0,34247 | -0,59 | -1,50  | 0,07668 | ---                    | ---       |
| 7921431      | -0,65 | -1,57 | 0,00987 | -0,92 | -1,90  | 0,09447 | --- MDGA2              | ---       |
| 7978801      | -0,65 | -1,57 | 0,00934 | -0,32 | -1,25  | 0,32550 | NM_001113498           | CTNND2    |
| 8110990      | -0,65 | -1,57 | 0,15489 | -1,61 | -3,05  | 0,04509 | NM_001332              | OR6N1     |
| 7921427      | -0,65 | -1,57 | 0,06037 | -1,24 | -2,37  | 0,01313 | NM_001005185           | ---       |
| 7908728      | -0,65 | -1,57 | 0,07372 | -0,81 | -1,75  | 0,02268 | --- FLJ45340           | ---       |
| 8135931      | -0,65 | -1,57 | 0,40966 | -0,62 | -1,54  | 0,14744 | NR_024368              | ---       |
| 8079731      | -0,65 | -1,57 | 0,02631 | -1,67 | -3,18  | 0,01327 | --- ETV7               | ---       |
| 8125993      | -0,65 | -1,57 | 0,14022 | -0,41 | -1,33  | 0,13634 | NM_016135              | FBRS      |
| 7994874      | -0,65 | -1,57 | 0,17419 | -0,50 | -1,41  | 0,07025 | NM_001105079           | BRMS1     |
| 7949603      | -0,65 | -1,57 | 0,25788 | 0,22  | 1,16   | 0,48103 | NM_015399              | CKMT1A    |
| 7983239      | -0,65 | -1,57 | 0,09079 | 0,52  | 1,43   | 0,11282 | NM_001015001           | CKMT1A    |
| 7983256      | -0,65 | -1,57 | 0,09079 | 0,52  | 1,43   | 0,11282 | NM_001015001           | SLC25A14  |
| 8169904      | -0,65 | -1,57 | 0,11504 | -0,26 | -1,19  | 0,25855 | NM_003951              | LOC285735 |
| 8122146      | -0,65 | -1,57 | 0,40561 | -1,35 | -2,54  | 0,01062 | NR_026969              | THAP9     |
| 8096091      | -0,65 | -1,57 | 0,01424 | 0,33  | 1,26   | 0,36881 | NM_024672              | TARS2     |

|         |       |       |         |       |       |         |                 |               |
|---------|-------|-------|---------|-------|-------|---------|-----------------|---------------|
| 7905198 | -0,65 | -1,57 | 0,11389 | 1,05  | 2,06  | 0,12447 | NM_025150       | ANK1          |
| 8150439 | -0,65 | -1,57 | 0,03723 | -0,74 | -1,68 | 0,03651 | NM_020476       | EPHB4         |
| 8141625 | -0,65 | -1,57 | 0,30695 | 2,30  | 4,93  | 0,00734 | NM_004444       | SYT9          |
| 7938213 | -0,65 | -1,57 | 0,27978 | -1,16 | -2,24 | 0,00333 | NM_175733       | HLXDC1        |
| 8014768 | -0,65 | -1,57 | 0,09583 | 0,22  | 1,16  | 0,42931 | NM_020405       | CEND1         |
| 7945536 | -0,65 | -1,57 | 0,07248 | -1,25 | -2,38 | 0,00050 | NM_016564       | ---           |
| 7927773 | -0,65 | -1,57 | 0,06476 | -0,92 | -1,89 | 0,01673 | ---             | ---           |
| 8170228 | -0,65 | -1,57 | 0,14221 | -0,91 | -1,88 | 0,03672 | ---             | ---           |
| 7945829 | -0,65 | -1,57 | 0,00334 | -0,80 | -1,74 | 0,04342 | ---             | C8orf37       |
| 8151898 | -0,65 | -1,57 | 0,17235 | 2,12  | 4,35  | 0,00381 | NM_177965       | LOC283392     |
| 7964976 | -0,65 | -1,57 | 0,13522 | -0,94 | -1,92 | 0,08752 | NR_026837       | MAP3K6        |
| 7914042 | -0,65 | -1,57 | 0,12702 | 0,40  | 1,32  | 0,38797 | NM_004672       | CLLU1         |
| 7957508 | -0,65 | -1,57 | 0,00172 | -1,16 | -2,23 | 0,04768 | NM_001025233    | S100A13       |
| 7920303 | -0,65 | -1,57 | 0,04568 | 0,17  | 1,13  | 0,68607 | NM_005979       | C3orf67       |
| 8088436 | -0,65 | -1,57 | 0,11612 | 0,68  | 1,61  | 0,15948 | NM_198463       | HDAC4         |
| 8060030 | -0,65 | -1,57 | 0,03132 | 0,31  | 1,24  | 0,53405 | NM_006037       | ---           |
| 8045028 | -0,65 | -1,57 | 0,02733 | -0,81 | -1,76 | 0,01166 | ---             | FLJ30403      |
| 8038874 | -0,65 | -1,57 | 0,21360 | -0,76 | -1,70 | 0,01977 | ENST00000301439 | AHSG          |
| 8084648 | -0,65 | -1,57 | 0,11838 | -1,13 | -2,19 | 0,04253 | NM_001622       | PLB1          |
| 8041061 | -0,65 | -1,57 | 0,03402 | -1,18 | -2,26 | 0,00336 | NM_153021       | STBD1         |
| 8095826 | -0,65 | -1,57 | 0,34906 | -0,45 | -1,36 | 0,02708 | NM_003943       | ---           |
| 7930376 | -0,65 | -1,57 | 0,06991 | -0,31 | -1,24 | 0,30315 | ---             | LAMB3         |
| 7924029 | -0,65 | -1,57 | 0,05525 | 2,88  | 7,34  | 0,00226 | NM_001017402    | ICOSLG        |
| 8070720 | -0,65 | -1,57 | 0,09881 | 0,00  | -1,00 | 0,98442 | NM_015259       | ---           |
| 8133750 | -0,65 | -1,57 | 0,09280 | -1,56 | -2,94 | 0,00151 | ---             | ---           |
| 8135160 | -0,65 | -1,57 | 0,09280 | -1,56 | -2,94 | 0,00151 | ---             | ---           |
| 8139901 | -0,65 | -1,57 | 0,09280 | -1,56 | -2,94 | 0,00151 | ---             | IGFL3         |
| 8037755 | -0,65 | -1,57 | 0,24785 | -1,15 | -2,23 | 0,00799 | NM_207393       | ZNF185        |
| 8170602 | -0,65 | -1,57 | 0,06014 | 1,26  | 2,39  | 0,01459 | NM_007150       | LEFTY1        |
| 7924663 | -0,65 | -1,57 | 0,17319 | -0,64 | -1,56 | 0,09031 | NM_020997       | NRN1L         |
| 7996715 | -0,65 | -1,57 | 0,24709 | -0,56 | -1,47 | 0,08887 | NM_198443       | WIPF2         |
| 8007058 | -0,65 | -1,57 | 0,16237 | 1,22  | 2,34  | 0,08276 | NM_133264       | IQGAP3        |
| 7921033 | -0,65 | -1,57 | 0,00116 | 1,40  | 2,63  | 0,00459 | NM_178229       | LOC401286     |
| 8130803 | -0,65 | -1,57 | 0,07196 | -0,97 | -1,96 | 0,06633 | AK127120        | LOC401286     |
| 8130976 | -0,65 | -1,57 | 0,07196 | -0,97 | -1,96 | 0,06633 | AK127120        | TNFRSF10A     |
| 8149762 | -0,65 | -1,57 | 0,14566 | 1,05  | 2,07  | 0,04848 | NM_003844       | ---           |
| 8058514 | -0,65 | -1,57 | 0,12730 | -0,79 | -1,73 | 0,06139 | ---             | SLC22A1       |
| 8123232 | -0,65 | -1,57 | 0,02817 | -0,92 | -1,89 | 0,14100 | NM_003057       | ---           |
| 7921471 | -0,65 | -1,57 | 0,00691 | -0,45 | -1,37 | 0,00571 | ---             | ---           |
| 8163426 | -0,65 | -1,57 | 0,01449 | -0,47 | -1,39 | 0,03542 | ---             | ---           |
| 8053718 | -0,65 | -1,57 | 0,20649 | -1,48 | -2,79 | 0,14682 | ---             | FAM71E2       |
| 8039477 | -0,65 | -1,57 | 0,06689 | -1,14 | -2,21 | 0,07077 | BC031875        | PYDC2         |
| 8084832 | -0,65 | -1,57 | 0,17723 | -1,23 | -2,35 | 0,14197 | NM_001083308    | ---           |
| 7956269 | -0,65 | -1,57 | 0,04468 | -1,03 | -2,04 | 0,09963 | ---             | POLR2C        |
| 7996051 | -0,65 | -1,57 | 0,41824 | 1,98  | 3,96  | 0,00073 | NM_032940       | GRM5          |
| 7950921 | -0,65 | -1,57 | 0,09418 | -1,27 | -2,41 | 0,00008 | NM_001143831    | HIST1H4F      |
| 8117422 | -0,65 | -1,57 | 0,12426 | -0,12 | -1,08 | 0,48816 | NM_003540       | HIST1H4B      |
| 8124385 | -0,65 | -1,57 | 0,11406 | 1,71  | 3,26  | 0,00007 | NM_003544       | KRT76         |
| 7963513 | -0,65 | -1,57 | 0,15357 | -0,98 | -1,97 | 0,04629 | NM_015848       | OR6Y1         |
| 7921360 | -0,65 | -1,57 | 0,04180 | -1,60 | -3,02 | 0,01482 | NM_001005189    | C16orf86      |
| 7996651 | -0,65 | -1,57 | 0,16637 | -0,30 | -1,23 | 0,16488 | NM_001012984    | IYD           |
| 8122744 | -0,65 | -1,57 | 0,10957 | -0,83 | -1,78 | 0,10073 | NM_001164694    | RAB9BP1       |
| 8107200 | -0,65 | -1,57 | 0,11953 | -0,72 | -1,65 | 0,00339 | NR_000039       | SNORD13P2     |
| 8131263 | -0,65 | -1,57 | 0,18182 | -0,23 | -1,17 | 0,33512 | X58060          | CXorf48       |
| 8175311 | -0,65 | -1,57 | 0,21527 | -1,70 | -3,24 | 0,07018 | NM_001031705    | ---           |
| 8170208 | -0,65 | -1,57 | 0,07535 | -1,51 | -2,85 | 0,00929 | ---             | LOC150197     |
| 8071355 | -0,65 | -1,57 | 0,19915 | -1,63 | -3,09 | 0,00283 | NR_026919       | GDPD5         |
| 7950501 | -0,65 | -1,57 | 0,08608 | -0,53 | -1,45 | 0,07793 | NM_030792       | ---           |
| 8167910 | -0,65 | -1,57 | 0,26616 | -0,86 | -1,81 | 0,11357 | ---             | HAO1          |
| 8064928 | -0,65 | -1,57 | 0,05159 | -0,65 | -1,57 | 0,00453 | NM_017545       | ACTRT1        |
| 8174979 | -0,65 | -1,57 | 0,06284 | -1,55 | -2,92 | 0,00211 | NM_138289       | TAS2R38       |
| 8143482 | -0,65 | -1,57 | 0,28743 | -1,10 | -2,14 | 0,00310 | NM_176817       | ---           |
| 8177174 | -0,65 | -1,57 | 0,00046 | -0,99 | -1,99 | 0,02942 | ---             | CALR3         |
| 8035146 | -0,65 | -1,57 | 0,18670 | -1,17 | -2,25 | 0,04021 | NM_145046       | IL20          |
| 7909261 | -0,65 | -1,57 | 0,10525 | -1,33 | -2,51 | 0,00174 | NM_018724       | OBP2A         |
| 8159259 | -0,65 | -1,57 | 0,32297 | -1,92 | -3,79 | 0,00431 | NM_014582       | NBEAL2        |
| 8079462 | -0,65 | -1,57 | 0,00783 | 1,92  | 3,80  | 0,00855 | NM_015175       | DNHD1         |
| 7938128 | -0,65 | -1,57 | 0,05902 | 0,19  | 1,14  | 0,64448 | NM_144666       | RP11-114H20.1 |
| 8167690 | -0,65 | -1,57 | 0,26577 | -2,00 | -3,99 | 0,00653 | ENST00000375625 | RP11-114H20.1 |
| 8172719 | -0,65 | -1,57 | 0,26577 | -2,00 | -3,99 | 0,00653 | ENST00000375625 | ---           |
| 7914665 | -0,65 | -1,57 | 0,30565 | -0,83 | -1,77 | 0,03059 | ---             | DEFB106A      |
| 8144452 | -0,65 | -1,57 | 0,15230 | -0,30 | -1,23 | 0,06393 | NM_152251       | DEFB106A      |
| 8149195 | -0,65 | -1,57 | 0,15230 | -0,30 | -1,23 | 0,06393 | NM_152251       | DEPDC4        |

|         |       |       |         |       |        |         |              |            |
|---------|-------|-------|---------|-------|--------|---------|--------------|------------|
| 7965760 | -0,65 | -1,57 | 0,19185 | 0,76  | 1,70   | 0,16636 | NM_152317    | KBTBD10    |
| 8046160 | -0,65 | -1,57 | 0,05878 | -1,31 | -2,48  | 0,04331 | NM_006063    | FAM106A    |
| 8013268 | -0,65 | -1,57 | 0,24236 | -0,85 | -1,81  | 0,06990 | NR_026809    | ---        |
| 8102858 | -0,66 | -1,57 | 0,05790 | -0,41 | -1,33  | 0,11493 | ---          | TMEM201    |
| 7897469 | -0,66 | -1,57 | 0,02547 | 0,57  | 1,49   | 0,25424 | NM_001130924 | MIR26A2    |
| 7964592 | -0,66 | -1,57 | 0,11105 | -0,51 | -1,42  | 0,21318 | NR_029847    | KISS1      |
| 7923621 | -0,66 | -1,57 | 0,15102 | -1,43 | -2,69  | 0,12632 | NM_002256    | THBD       |
| 8065353 | -0,66 | -1,57 | 0,26433 | -1,08 | -2,11  | 0,03367 | NM_000361    | BDH1       |
| 8093219 | -0,66 | -1,58 | 0,14339 | -0,10 | -1,07  | 0,80282 | NM_203314    | ---        |
| 8147303 | -0,66 | -1,58 | 0,10151 | 0,15  | 1,11   | 0,31150 | ---          | ---        |
| 8101716 | -0,66 | -1,58 | 0,04943 | -1,30 | -2,46  | 0,00467 | ---          | SLC5A10    |
| 8013309 | -0,66 | -1,58 | 0,09039 | -0,95 | -1,93  | 0,05231 | NM_152351    | C7orf55    |
| 8136535 | -0,66 | -1,58 | 0,00664 | -0,77 | -1,70  | 0,00898 | NM_197964    | ---        |
| 8073343 | -0,66 | -1,58 | 0,26687 | 1,66  | 3,17   | 0,01514 | ---          | TMEM143    |
| 8038069 | -0,66 | -1,58 | 0,11538 | -0,79 | -1,73  | 0,00999 | NM_018273    | ---        |
| 8095005 | -0,66 | -1,58 | 0,71572 | -5,94 | -61,54 | 0,00041 | ---          | MIR30A     |
| 8127500 | -0,66 | -1,58 | 0,30756 | -0,30 | -1,23  | 0,02538 | NR_029504    | FLJ43860   |
| 8153273 | -0,66 | -1,58 | 0,01650 | -1,38 | -2,60  | 0,00651 | NM_207414    | KRTAP10-11 |
| 8069156 | -0,66 | -1,58 | 0,53965 | -2,06 | -4,16  | 0,00019 | NM_198692    | PDE6B      |
| 8093360 | -0,66 | -1,58 | 0,03185 | -0,57 | -1,48  | 0,01295 | NM_000283    | SCARNA11   |
| 7960635 | -0,66 | -1,58 | 0,35119 | -1,60 | -3,03  | 0,01913 | NR_003012    | TTC9B      |
| 8036830 | -0,66 | -1,58 | 0,08487 | -1,29 | -2,45  | 0,00077 | NM_152479    | OR13C8     |
| 8157014 | -0,66 | -1,58 | 0,15260 | -0,85 | -1,80  | 0,00160 | NM_001004483 | OR10AG1    |
| 7948111 | -0,66 | -1,58 | 0,11017 | -0,85 | -1,81  | 0,01260 | NM_001005491 | KIAA1529   |
| 8156633 | -0,66 | -1,58 | 0,16482 | 0,29  | 1,23   | 0,35055 | BC144521     | EAF2       |
| 8082003 | -0,66 | -1,58 | 0,04981 | -0,24 | -1,18  | 0,13293 | NM_018456    | ZNF263     |
| 7992870 | -0,66 | -1,58 | 0,09266 | 0,87  | 1,83   | 0,07579 | NM_005741    | C11orf41   |
| 7939237 | -0,66 | -1,58 | 0,20351 | -0,73 | -1,65  | 0,01559 | NM_012194    | FLJ45721   |
| 8099754 | -0,66 | -1,58 | 0,09517 | -1,14 | -2,20  | 0,01737 | AK127623     | PAQR8      |
| 8120215 | -0,66 | -1,58 | 0,44651 | 0,58  | 1,49   | 0,07492 | NM_133367    | OR4S2      |
| 7939930 | -0,66 | -1,58 | 0,00441 | -1,47 | -2,77  | 0,03978 | NM_001004059 | ---        |
| 7972733 | -0,66 | -1,58 | 0,00376 | -0,91 | -1,88  | 0,00499 | ---          | CYP2B6     |
| 8028963 | -0,66 | -1,58 | 0,02000 | -1,35 | -2,55  | 0,00978 | NM_000767    | C15orf21   |
| 7983490 | -0,66 | -1,58 | 0,10209 | -0,42 | -1,34  | 0,24887 | NR_022014    | OR2A5      |
| 8136967 | -0,66 | -1,58 | 0,33468 | -0,63 | -1,55  | 0,10197 | NM_012365    | ---        |
| 8106350 | -0,66 | -1,58 | 0,27320 | -0,18 | -1,13  | 0,45080 | ---          | FOXP4      |
| 8119444 | -0,66 | -1,58 | 0,09833 | 0,81  | 1,75   | 0,03349 | NM_001012426 | CELA2B     |
| 7898184 | -0,66 | -1,58 | 0,12931 | -1,12 | -2,17  | 0,04248 | NM_015849    | GALE       |
| 7913667 | -0,66 | -1,58 | 0,09580 | 2,51  | 5,68   | 0,00489 | NM_000403    | ---        |
| 7993335 | -0,66 | -1,58 | 0,26480 | -1,83 | -3,57  | 0,00222 | ---          | KLHL4      |
| 8168622 | -0,66 | -1,58 | 0,05417 | -0,58 | -1,49  | 0,00227 | NM_019117    | A4GALT     |
| 8076497 | -0,66 | -1,58 | 0,04563 | -0,08 | -1,06  | 0,55951 | NM_017436    | ARHGEF4    |
| 8045229 | -0,66 | -1,58 | 0,07035 | -0,14 | -1,11  | 0,71325 | NM_032995    | ZCCHC18    |
| 8169083 | -0,66 | -1,58 | 0,26549 | -0,58 | -1,49  | 0,04066 | NM_001143978 | WASH3P     |
| 7986541 | -0,66 | -1,58 | 0,28807 | 0,77  | 1,71   | 0,01284 | NR_003659    | NCAPH2     |
| 8074082 | -0,66 | -1,58 | 0,07326 | -1,13 | -2,18  | 0,02673 | NM_152299    | ---        |
| 8002102 | -0,66 | -1,58 | 0,13173 | -1,69 | -3,22  | 0,00005 | ---          | PLA2G4F    |
| 7987815 | -0,66 | -1,58 | 0,05429 | -1,04 | -2,06  | 0,00792 | NM_213600    | ANKRD20A3  |
| 8155397 | -0,66 | -1,58 | 0,27703 | -0,59 | -1,51  | 0,05428 | NM_001012419 | ANKRD20A3  |
| 8161388 | -0,66 | -1,58 | 0,27703 | -0,59 | -1,51  | 0,05428 | NM_001012419 | ---        |
| 7934432 | -0,66 | -1,58 | 0,14059 | -0,83 | -1,78  | 0,00249 | ---          | BCL2L15    |
| 7918694 | -0,66 | -1,58 | 0,15784 | -0,89 | -1,85  | 0,01577 | NM_001010922 | C6orf174   |
| 8129392 | -0,66 | -1,58 | 0,07886 | -0,29 | -1,22  | 0,37018 | NM_001012279 | MS4A12     |
| 7940299 | -0,66 | -1,58 | 0,02861 | -1,02 | -2,03  | 0,06026 | NM_017716    | WNT5B      |
| 7953012 | -0,66 | -1,58 | 0,18956 | -0,89 | -1,85  | 0,13154 | NM_032642    | ZNF367     |
| 8162601 | -0,66 | -1,58 | 0,09348 | -0,08 | -1,05  | 0,84804 | NM_153695    | ---        |
| 8138065 | -0,66 | -1,58 | 0,26247 | -0,97 | -1,96  | 0,02841 | ---          | VSTM2L     |
| 8062427 | -0,66 | -1,58 | 0,14856 | -0,68 | -1,61  | 0,10425 | NM_080607    | ---        |
| 8062687 | -0,66 | -1,58 | 0,10775 | -0,71 | -1,64  | 0,19719 | ---          | ---        |
| 8157677 | -0,66 | -1,58 | 0,16591 | -1,59 | -3,00  | 0,00008 | ---          | ---        |
| 7936639 | -0,66 | -1,58 | 0,12198 | -1,63 | -3,09  | 0,00116 | ---          | STXBP5L    |
| 8081959 | -0,66 | -1,58 | 0,07110 | -0,40 | -1,32  | 0,01941 | NM_014980    | CRYGC      |
| 8058524 | -0,66 | -1,58 | 0,00420 | -0,90 | -1,87  | 0,04520 | NM_020989    | ---        |
| 8148302 | -0,66 | -1,58 | 0,12378 | -0,73 | -1,66  | 0,03910 | ---          | ---        |
| 8152865 | -0,66 | -1,58 | 0,14758 | -0,97 | -1,96  | 0,03725 | ---          | TMSB15A    |
| 8174189 | -0,66 | -1,58 | 0,10248 | -1,22 | -2,32  | 0,06985 | NM_021992    | ---        |
| 8128618 | -0,66 | -1,58 | 0,10644 | -0,69 | -1,61  | 0,01004 | ---          | SNORA70C   |
| 8163710 | -0,66 | -1,58 | 0,02972 | -1,34 | -2,53  | 0,00218 | NR_003708    | KIAA1654   |
| 8076561 | -0,66 | -1,58 | 0,13364 | -0,80 | -1,74  | 0,00276 | AB051441     | ---        |
| 7922458 | -0,66 | -1,58 | 0,06000 | -0,24 | -1,18  | 0,15118 | ---          | ZNF829     |
| 8036365 | -0,66 | -1,58 | 0,00707 | -0,16 | -1,12  | 0,34663 | NM_001171979 | SLC6A6     |
| 8078014 | -0,66 | -1,58 | 0,16194 | 2,68  | 6,40   | 0,00447 | NM_003043    | ---        |
| 7909527 | -0,66 | -1,58 | 0,01084 | -0,46 | -1,38  | 0,43155 | ---          | GRAMD4     |

|         |       |       |         |       |        |         |                  |           |
|---------|-------|-------|---------|-------|--------|---------|------------------|-----------|
| 8073890 | -0,66 | -1,58 | 0,01194 | 1,37  | 2,58   | 0,00362 | NM_015124        | KRTAP5-1  |
| 7945645 | -0,66 | -1,58 | 0,44138 | -0,94 | -1,92  | 0,17875 | NM_001005922     | QRICH2    |
| 8018673 | -0,66 | -1,58 | 0,06330 | 0,87  | 1,83   | 0,05328 | NM_032134        | GOLGA8F   |
| 7981895 | -0,66 | -1,58 | 0,13437 | -0,34 | -1,26  | 0,55114 | NR_033351        | BIRC5     |
| 8010260 | -0,66 | -1,58 | 0,14559 | 0,42  | 1,34   | 0,08688 | NM_001168        | TMEM52    |
| 7911634 | -0,66 | -1,58 | 0,32266 | -1,02 | -2,03  | 0,06440 | NM_178545        | RBM46     |
| 8097928 | -0,66 | -1,58 | 0,16603 | -0,76 | -1,70  | 0,00579 | NM_144979        | CYP4F8    |
| 8026442 | -0,66 | -1,58 | 0,10740 | -1,17 | -2,25  | 0,00941 | NM_007253        | GPR22     |
| 8135405 | -0,66 | -1,58 | 0,10376 | -0,78 | -1,72  | 0,00421 | NM_005295        | GOLGA9P   |
| 7982206 | -0,66 | -1,58 | 0,17194 | -0,48 | -1,40  | 0,01537 | NR_024074        | LOC440863 |
| 8041886 | -0,66 | -1,58 | 0,16090 | -1,04 | -2,05  | 0,01553 | AK026773 TRIM40  |           |
| 8117840 | -0,66 | -1,58 | 0,13764 | -1,58 | -2,98  | 0,00464 | NM_138700        | ---       |
| 8057416 | -0,66 | -1,58 | 0,03193 | -1,05 | -2,06  | 0,01117 | ---              | ---       |
| 8156525 | -0,66 | -1,58 | 0,01602 | -1,07 | -2,09  | 0,01256 | ---              | DAOA      |
| 7969959 | -0,66 | -1,58 | 0,10482 | -1,18 | -2,26  | 0,00089 | NM_172370        | CYP8B1    |
| 8086457 | -0,66 | -1,58 | 0,02546 | -0,99 | -1,99  | 0,02209 | NM_004391        | ---       |
| 8086536 | -0,66 | -1,58 | 0,10443 | -0,83 | -1,78  | 0,00105 | ---              | RAD9A     |
| 7941865 | -0,66 | -1,58 | 0,05782 | 2,79  | 6,92   | 0,00203 | NM_004584        | NBPF7     |
| 7919080 | -0,66 | -1,58 | 0,00926 | -0,75 | -1,68  | 0,09226 | NM_001047980     | CDHR2     |
| 8110183 | -0,66 | -1,58 | 0,11102 | -0,25 | -1,19  | 0,48298 | NM_017675        | LENG9     |
| 8039269 | -0,66 | -1,58 | 0,03918 | -0,34 | -1,27  | 0,44775 | NM_198988        | DYDC1     |
| 7934767 | -0,66 | -1,58 | 0,01782 | -0,97 | -1,95  | 0,00927 | NM_138812        | CADM3     |
| 7906417 | -0,66 | -1,58 | 0,34438 | -1,53 | -2,89  | 0,00164 | NM_021189        | LY86      |
| 8116734 | -0,66 | -1,58 | 0,05703 | -1,00 | -2,01  | 0,00078 | NM_004271        | ITPKB     |
| 7924760 | -0,66 | -1,58 | 0,03331 | 0,25  | 1,19   | 0,34640 | NM_002221        | RXFP4     |
| 7906069 | -0,66 | -1,58 | 0,05415 | -1,56 | -2,95  | 0,02931 | NM_181885        | CXCL6     |
| 8095688 | -0,66 | -1,58 | 0,23825 | -0,99 | -1,99  | 0,04808 | NM_002993        | LRRIQ1    |
| 7957433 | -0,66 | -1,58 | 0,12206 | -0,88 | -1,84  | 0,02684 | NM_032165        | ---       |
| 7959232 | -0,66 | -1,58 | 0,25090 | -1,11 | -2,15  | 0,00022 | ---              | BFSP2     |
| 8082774 | -0,66 | -1,58 | 0,29913 | -0,59 | -1,50  | 0,22382 | NM_003571        | NPHP4     |
| 7911902 | -0,66 | -1,58 | 0,03531 | 0,01  | 1,01   | 0,94040 | NM_015102        | USP20     |
| 8158568 | -0,66 | -1,58 | 0,16265 | 1,05  | 2,06   | 0,00655 | NM_006676        | ZNF529    |
| 8036333 | -0,66 | -1,58 | 0,22323 | -0,38 | -1,30  | 0,49808 | NM_020951        | LIPI      |
| 8069521 | -0,66 | -1,58 | 0,04412 | -0,66 | -1,58  | 0,00050 | NM_198996        | FNDC7     |
| 7903530 | -0,66 | -1,58 | 0,23314 | -0,50 | -1,42  | 0,08647 | NM_001144937     | ---       |
| 8104068 | -0,66 | -1,58 | 0,23032 | -1,35 | -2,56  | 0,01305 | ---              | CLDN10    |
| 7969640 | -0,66 | -1,58 | 0,25616 | 0,62  | 1,53   | 0,17036 | NM_182848        | C2orf39   |
| 8040672 | -0,66 | -1,58 | 0,22237 | -0,76 | -1,69  | 0,04294 | NM_145038        | LOC440700 |
| 7906988 | -0,66 | -1,58 | 0,04764 | -0,44 | -1,36  | 0,06627 | BC012108 SNCG    |           |
| 7928872 | -0,66 | -1,58 | 0,26826 | -0,75 | -1,68  | 0,19693 | NM_003087        | FLJ90757  |
| 8019083 | -0,66 | -1,58 | 0,02043 | -0,22 | -1,16  | 0,59491 | NR_026857        | CYBB      |
| 8166730 | -0,66 | -1,58 | 0,01739 | -0,70 | -1,63  | 0,01185 | NM_000397        | ---       |
| 8094677 | -0,66 | -1,58 | 0,01983 | -0,67 | -1,59  | 0,13207 | ---              | PSD2      |
| 8108453 | -0,66 | -1,58 | 0,01203 | -1,37 | -2,59  | 0,00200 | NM_032289        | ---       |
| 7897995 | -0,66 | -1,58 | 0,18021 | -0,56 | -1,48  | 0,01565 | ---              | ---       |
| 7912589 | -0,66 | -1,58 | 0,18021 | -0,56 | -1,48  | 0,01565 | ---              | C12orf28  |
| 7957092 | -0,66 | -1,58 | 0,02514 | 0,02  | 1,01   | 0,95785 | BC143553 SYNM    |           |
| 7986385 | -0,66 | -1,58 | 0,26195 | 0,03  | 1,02   | 0,92604 | NM_145728        | ---       |
| 7983677 | -0,66 | -1,58 | 0,29166 | -0,82 | -1,77  | 0,00167 | ---              | C9orf38   |
| 8160020 | -0,66 | -1,58 | 0,04856 | -1,17 | -2,25  | 0,03804 | AF090921 BCL2L12 |           |
| 8030429 | -0,66 | -1,58 | 0,36931 | 0,59  | 1,50   | 0,11702 | NM_138639        | PNPLA3    |
| 8073633 | -0,66 | -1,58 | 0,22096 | 0,25  | 1,19   | 0,59430 | NM_025225        | C16orf53  |
| 7994655 | -0,66 | -1,58 | 0,12978 | 0,36  | 1,28   | 0,16318 | NM_024516        | MLPH      |
| 8049487 | -0,66 | -1,59 | 0,02669 | -0,36 | -1,28  | 0,22953 | NM_024101        | C3orf39   |
| 8086462 | -0,66 | -1,59 | 0,11013 | -0,16 | -1,11  | 0,71773 | NM_032806        | FUNDC2P2  |
| 8043040 | -0,66 | -1,59 | 0,21448 | -1,06 | -2,08  | 0,02848 | NR_003663        | SYT6      |
| 7918716 | -0,66 | -1,59 | 0,19427 | -1,54 | -2,90  | 0,07148 | NM_205848        | ZNF536    |
| 8027431 | -0,66 | -1,59 | 0,01632 | -0,60 | -1,52  | 0,02470 | NM_014717        | ---       |
| 8165709 | -0,66 | -1,59 | 0,56415 | -3,99 | -15,90 | 0,00899 | ---              | GOLGA9P   |
| 7982271 | -0,67 | -1,59 | 0,18505 | -1,20 | -2,30  | 0,22471 | NR_024074        | ---       |
| 7924461 | -0,67 | -1,59 | 0,21958 | -1,36 | -2,57  | 0,08634 | ---              | ---       |
| 8112611 | -0,67 | -1,59 | 0,04767 | -0,74 | -1,67  | 0,05982 | ---              | DEFA4     |
| 8149109 | -0,67 | -1,59 | 0,10190 | -0,79 | -1,72  | 0,01026 | NM_001925        | SLCO1C1   |
| 7954312 | -0,67 | -1,59 | 0,04880 | -1,34 | -2,53  | 0,01970 | NM_017435        | LOC390956 |
| 8038668 | -0,67 | -1,59 | 0,18190 | -1,41 | -2,66  | 0,00866 | ENST00000427643  | ---       |
| 8147691 | -0,67 | -1,59 | 0,01348 | -1,08 | -2,12  | 0,00061 | ---              | BCO2      |
| 7943867 | -0,67 | -1,59 | 0,05319 | -1,10 | -2,14  | 0,02933 | NM_031938        | HOXD13    |
| 8046524 | -0,67 | -1,59 | 0,11737 | -1,83 | -3,56  | 0,00212 | NM_000523        | ---       |
| 8001131 | -0,67 | -1,59 | 0,01142 | -0,41 | -1,33  | 0,01300 | ---              | NR2E1     |
| 8121334 | -0,67 | -1,59 | 0,01384 | -0,21 | -1,16  | 0,08908 | NM_003269        | MLNR      |
| 7969093 | -0,67 | -1,59 | 0,44225 | -0,80 | -1,74  | 0,01753 | NM_001507        | MASP2     |
| 7912361 | -0,67 | -1,59 | 0,12076 | -1,20 | -2,30  | 0,01043 | NM_006610        | ---       |
| 8126434 | -0,67 | -1,59 | 0,00273 | -0,85 | -1,80  | 0,03000 | ---              | MIR200C   |

|         |       |       |         |       |       |         |              |             |
|---------|-------|-------|---------|-------|-------|---------|--------------|-------------|
| 7953590 | -0,67 | -1,59 | 0,18317 | -1,09 | -2,12 | 0,03784 | NR_029779    | ---         |
| 8136587 | -0,67 | -1,59 | 0,06251 | -1,25 | -2,37 | 0,02538 | ---          | VAV3        |
| 7918157 | -0,67 | -1,59 | 0,12737 | -0,75 | -1,68 | 0,05924 | NM_006113    | ---         |
| 7903889 | -0,67 | -1,59 | 0,31029 | -2,30 | -4,92 | 0,01822 | ---          | ---         |
| 8102777 | -0,67 | -1,59 | 0,00035 | -0,76 | -1,70 | 0,00310 | ---          | ARMC6       |
| 8027117 | -0,67 | -1,59 | 0,36236 | 0,41  | 1,33  | 0,49079 | NM_033415    | ---         |
| 8146326 | -0,67 | -1,59 | 0,16556 | -1,67 | -3,17 | 0,00399 | ---          | ---         |
| 7934566 | -0,67 | -1,59 | 0,20726 | -2,10 | -4,27 | 0,00070 | ---          | LDB3        |
| 7928838 | -0,67 | -1,59 | 0,06242 | -1,10 | -2,15 | 0,01136 | NM_007078    | C2orf88     |
| 8047062 | -0,67 | -1,59 | 0,06923 | -0,83 | -1,78 | 0,00457 | NM_001042519 | ANKRD19     |
| 8156360 | -0,67 | -1,59 | 0,03910 | -0,62 | -1,54 | 0,14117 | NR_026868    | PDZRN4      |
| 7954926 | -0,67 | -1,59 | 0,04164 | -1,24 | -2,36 | 0,00124 | NM_013377    | NCRNA00116  |
| 8054511 | -0,67 | -1,59 | 0,28785 | 0,08  | 1,06  | 0,70544 | BC064430     | PITPNM2     |
| 7967358 | -0,67 | -1,59 | 0,10815 | 0,70  | 1,62  | 0,09147 | NM_020845    | RPL22P15    |
| 8044351 | -0,67 | -1,59 | 0,15739 | -0,43 | -1,35 | 0,15870 | CR590757     | ---         |
| 7952319 | -0,67 | -1,59 | 0,06262 | -0,89 | -1,85 | 0,00388 | ---          | TRPM2       |
| 8069085 | -0,67 | -1,59 | 0,06720 | -1,02 | -2,02 | 0,03161 | NM_003307    | STK31       |
| 8131890 | -0,67 | -1,59 | 0,23544 | -0,05 | -1,03 | 0,82775 | NM_032944    | FLJ35816    |
| 8093453 | -0,67 | -1,59 | 0,07235 | -1,06 | -2,08 | 0,11043 | AK093135     | ZG16        |
| 7994615 | -0,67 | -1,59 | 0,13036 | -0,60 | -1,51 | 0,00968 | NM_152338    | MIR323      |
| 7976832 | -0,67 | -1,59 | 0,20076 | -1,51 | -2,85 | 0,06554 | NR_029890    | ---         |
| 8118005 | -0,67 | -1,59 | 0,10558 | -0,30 | -1,23 | 0,01929 | ---          | ADAMTS14    |
| 7928147 | -0,67 | -1,59 | 0,24234 | -1,23 | -2,34 | 0,00382 | NM_139155    | ---         |
| 7922667 | -0,67 | -1,59 | 0,08213 | -1,26 | -2,39 | 0,00129 | ---          | CPNE7       |
| 7997942 | -0,67 | -1,59 | 0,13069 | 0,56  | 1,47  | 0,16065 | NM_014427    | IGHA1       |
| 7995263 | -0,67 | -1,59 | 0,61667 | -3,29 | -9,77 | 0,00136 | AF067420     | MAP6        |
| 7950524 | -0,67 | -1,59 | 0,21571 | -0,75 | -1,68 | 0,20052 | NM_207577    | CEACAM1     |
| 8037205 | -0,67 | -1,59 | 0,03383 | -0,78 | -1,72 | 0,00608 | NM_001712    | ---         |
| 8044880 | -0,67 | -1,59 | 0,20302 | -1,02 | -2,03 | 0,00162 | ---          | ---         |
| 8167251 | -0,67 | -1,59 | 0,24364 | -0,79 | -1,73 | 0,05141 | ---          | SPP2        |
| 8049425 | -0,67 | -1,59 | 0,03589 | -1,35 | -2,55 | 0,01765 | NM_006944    | ---         |
| 8081356 | -0,67 | -1,59 | 0,00891 | -0,95 | -1,93 | 0,05948 | ---          | AICDA       |
| 7960910 | -0,67 | -1,59 | 0,37100 | -1,76 | -3,39 | 0,00153 | NM_020661    | THAP7       |
| 8074688 | -0,67 | -1,59 | 0,18265 | 1,26  | 2,39  | 0,15258 | NM_030573    | PLEKHA7     |
| 7946781 | -0,67 | -1,59 | 0,21596 | 1,05  | 2,07  | 0,06822 | NM_175058    | LOC729866   |
| 7921342 | -0,67 | -1,59 | 0,11109 | -0,57 | -1,49 | 0,18465 | AK057458     | ZSCAN20     |
| 7899884 | -0,67 | -1,59 | 0,02891 | -0,10 | -1,07 | 0,79193 | NM_145238    | ESAM        |
| 7952436 | -0,67 | -1,59 | 0,02086 | -0,79 | -1,73 | 0,09984 | NM_138961    | PRSS38      |
| 7910211 | -0,67 | -1,59 | 0,00405 | -1,42 | -2,68 | 0,00575 | NM_183062    | PAIP2B      |
| 8052940 | -0,67 | -1,59 | 0,11861 | 1,42  | 2,67  | 0,02407 | NM_020459    | C10orf125   |
| 7937208 | -0,67 | -1,59 | 0,38568 | 0,11  | 1,08  | 0,79973 | NM_198472    | ---         |
| 8060835 | -0,67 | -1,59 | 0,01622 | -1,01 | -2,02 | 0,00016 | ---          | HERC5       |
| 8096361 | -0,67 | -1,59 | 0,14834 | 1,03  | 2,04  | 0,08035 | NM_016323    | ---         |
| 8016607 | -0,67 | -1,59 | 0,05600 | -1,48 | -2,79 | 0,00027 | ---          | MYO7A       |
| 7942717 | -0,67 | -1,59 | 0,12177 | -0,74 | -1,66 | 0,01909 | NM_000260    | GTSF1L      |
| 8066384 | -0,67 | -1,59 | 0,00629 | -0,41 | -1,33 | 0,00684 | NM_176791    | ---         |
| 8148640 | -0,67 | -1,59 | 0,19393 | -0,42 | -1,34 | 0,00486 | ---          | DENND2C     |
| 7918747 | -0,67 | -1,59 | 0,05430 | -0,87 | -1,82 | 0,03780 | BC063894     | EDA         |
| 8168062 | -0,67 | -1,59 | 0,05937 | -0,96 | -1,94 | 0,00274 | NM_001399    | HDC         |
| 7988672 | -0,67 | -1,59 | 0,04209 | -1,25 | -2,38 | 0,03103 | NM_002112    | ---         |
| 8123336 | -0,67 | -1,59 | 0,08010 | -0,72 | -1,64 | 0,05773 | ---          | TRPM6       |
| 8161774 | -0,67 | -1,59 | 0,02821 | -0,63 | -1,54 | 0,01158 | NM_017662    | ---         |
| 8040111 | -0,67 | -1,59 | 0,11017 | -0,55 | -1,46 | 0,00453 | ---          | HTR3C       |
| 8084275 | -0,67 | -1,59 | 0,24992 | -0,92 | -1,89 | 0,02493 | NM_130770    | ZC3H18      |
| 7997779 | -0,67 | -1,59 | 0,14598 | 0,29  | 1,22  | 0,29920 | NM_144604    | ANKRD2      |
| 7929653 | -0,67 | -1,59 | 0,02897 | -0,79 | -1,72 | 0,04584 | NM_020349    | ACE2        |
| 8171449 | -0,67 | -1,59 | 0,17994 | -1,00 | -2,00 | 0,02766 | NM_021804    | ---         |
| 8139857 | -0,67 | -1,59 | 0,07360 | -1,65 | -3,13 | 0,00086 | ---          | PFAS        |
| 8004804 | -0,67 | -1,59 | 0,13173 | 0,99  | 1,99  | 0,02572 | NM_012393    | ---         |
| 7935056 | -0,67 | -1,59 | 0,01045 | -0,87 | -1,82 | 0,04251 | ---          | GIPC2       |
| 7902518 | -0,67 | -1,59 | 0,17990 | -0,90 | -1,86 | 0,00286 | NM_017655    | ITGAM       |
| 7995096 | -0,67 | -1,59 | 0,14687 | -1,33 | -2,51 | 0,01719 | NM_001145808 | SNORD115-15 |
| 7982036 | -0,67 | -1,59 | 0,15663 | -1,14 | -2,20 | 0,03256 | NR_003307    | ELOVL7      |
| 8112274 | -0,67 | -1,59 | 0,01640 | 2,81  | 7,02  | 0,00041 | NM_024930    | TLR7        |
| 8166059 | -0,67 | -1,59 | 0,01604 | -1,04 | -2,06 | 0,00044 | NM_016562    | ---         |
| 7964981 | -0,67 | -1,59 | 0,06906 | -1,51 | -2,84 | 0,01710 | ---          | SNORD1A     |
| 8010082 | -0,67 | -1,59 | 0,00068 | -1,24 | -2,36 | 0,00660 | NR_004395    | EF5         |
| 7977978 | -0,67 | -1,59 | 0,06675 | -0,98 | -1,97 | 0,06181 | NM_005864    | HYDIN       |
| 8002492 | -0,67 | -1,59 | 0,20462 | -0,56 | -1,48 | 0,12865 | NM_032821    | SLC25A45    |
| 7949400 | -0,67 | -1,59 | 0,08482 | 1,06  | 2,09  | 0,01729 | NM_182556    | MIR155      |
| 8068022 | -0,67 | -1,59 | 0,36770 | -0,89 | -1,85 | 0,00079 | NR_030784    | ASB16       |
| 8007584 | -0,67 | -1,59 | 0,39209 | -1,52 | -2,86 | 0,00530 | NM_080863    | CEMP1       |
| 7998817 | -0,67 | -1,59 | 0,19037 | -0,31 | -1,24 | 0,04615 | NM_001048212 | DNHD1       |



|         |       |       |         |       |       |         |              |            |
|---------|-------|-------|---------|-------|-------|---------|--------------|------------|
| 7938139 | -0,67 | -1,59 | 0,15927 | 0,51  | 1,42  | 0,04809 | NM_144666    | IFNA14     |
| 8160383 | -0,67 | -1,59 | 0,12130 | -0,85 | -1,81 | 0,13210 | NM_002172    | CLEC4A     |
| 7953723 | -0,67 | -1,59 | 0,07177 | -0,29 | -1,22 | 0,07896 | NM_016184    | ---        |
| 7993146 | -0,67 | -1,59 | 0,10871 | -0,88 | -1,84 | 0,00389 | ---          | PRAMEF22   |
| 7898002 | -0,67 | -1,59 | 0,11835 | -1,40 | -2,63 | 0,01193 | NM_001100631 | OR1E1      |
| 8011339 | -0,67 | -1,59 | 0,03592 | -0,72 | -1,64 | 0,04033 | NM_003553    | ---        |
| 8043018 | -0,67 | -1,59 | 0,32116 | -1,48 | -2,80 | 0,00007 | ---          | NCRNA00164 |
| 8055297 | -0,67 | -1,59 | 0,26655 | -0,33 | -1,26 | 0,30815 | NR_027020    | BAIAP3     |
| 7992219 | -0,67 | -1,59 | 0,02607 | 0,22  | 1,16  | 0,50568 | NM_003933    | BREA2      |
| 8148671 | -0,67 | -1,60 | 0,33705 | -0,51 | -1,42 | 0,10607 | NR_015445    | ---        |
| 8021712 | -0,67 | -1,60 | 0,13263 | -0,51 | -1,42 | 0,13235 | ---          | C20orf117  |
| 8066091 | -0,67 | -1,60 | 0,03777 | -0,44 | -1,36 | 0,17051 | NM_080627    | SFTPD      |
| 7934719 | -0,67 | -1,60 | 0,22841 | -1,22 | -2,33 | 0,00402 | NM_003019    | OR11H1     |
| 7977472 | -0,67 | -1,60 | 0,22528 | -3,11 | -8,61 | 0,00057 | NM_001005239 | ---        |
| 7949744 | -0,67 | -1,60 | 0,53403 | -1,52 | -2,86 | 0,10011 | ---          | CNDP1      |
| 8021741 | -0,67 | -1,60 | 0,01628 | -0,70 | -1,62 | 0,04928 | NM_032649    | ---        |
| 8068397 | -0,67 | -1,60 | 0,05761 | 1,78  | 3,44  | 0,00762 | ---          | ---        |
| 7927031 | -0,67 | -1,60 | 0,00505 | -0,60 | -1,51 | 0,00009 | ---          | BIN2       |
| 7963289 | -0,67 | -1,60 | 0,11761 | -1,51 | -2,85 | 0,00011 | NM_016293    | ---        |
| 8091095 | -0,67 | -1,60 | 0,00616 | -0,99 | -1,99 | 0,00882 | ---          | ---        |
| 8118544 | -0,67 | -1,60 | 0,21079 | -1,98 | -3,94 | 0,00955 | ---          | TM6SF1     |
| 7985493 | -0,67 | -1,60 | 0,00139 | 1,27  | 2,41  | 0,00987 | NM_023003    | OR4D10     |
| 7940177 | -0,67 | -1,60 | 0,11663 | -1,47 | -2,78 | 0,01024 | NM_001004705 | TRNP1      |
| 7899284 | -0,67 | -1,60 | 0,36134 | -0,62 | -1,54 | 0,24645 | NM_001013642 | BMP15      |
| 8167642 | -0,67 | -1,60 | 0,03696 | -1,04 | -2,05 | 0,01590 | NM_005448    | PANX3      |
| 7944845 | -0,68 | -1,60 | 0,11526 | -1,68 | -3,20 | 0,01952 | NM_052959    | ---        |
| 8062691 | -0,68 | -1,60 | 0,05951 | -1,41 | -2,65 | 0,00450 | ---          | RRAGA      |
| 8154523 | -0,68 | -1,60 | 0,06402 | -0,08 | -1,06 | 0,76296 | NM_006570    | IL2RG      |
| 8173444 | -0,68 | -1,60 | 0,19840 | -1,49 | -2,81 | 0,00000 | NM_000206    | KRTAP21-2  |
| 8069855 | -0,68 | -1,60 | 0,20842 | -1,37 | -2,59 | 0,10837 | NM_181617    | HIST1H1B   |
| 8124527 | -0,68 | -1,60 | 0,10458 | 1,25  | 2,38  | 0,00116 | NM_005322    | SLITRK5    |
| 7969569 | -0,68 | -1,60 | 0,11189 | -1,17 | -2,25 | 0,02782 | NM_015567    | KPNA7      |
| 8141263 | -0,68 | -1,60 | 0,15818 | 1,98  | 3,93  | 0,00219 | NM_001145715 | SPAG4      |
| 8062190 | -0,68 | -1,60 | 0,03898 | -0,21 | -1,15 | 0,42816 | NM_003116    | BTK        |
| 8174051 | -0,68 | -1,60 | 0,09818 | -0,89 | -1,85 | 0,05187 | NM_000061    | CHDH       |
| 8088142 | -0,68 | -1,60 | 0,05071 | 0,94  | 1,91  | 0,03455 | NM_018397    | ---        |
| 7910383 | -0,68 | -1,60 | 0,07376 | 0,96  | 1,95  | 0,16555 | ---          | PLXNA2     |
| 7923991 | -0,68 | -1,60 | 0,00408 | -0,35 | -1,28 | 0,04319 | NM_025179    | HOXA10     |
| 8138757 | -0,68 | -1,60 | 0,10135 | -0,12 | -1,09 | 0,58335 | NM_018951    | ---        |
| 7981333 | -0,68 | -1,60 | 0,00260 | -0,99 | -1,98 | 0,00836 | ---          | ---        |
| 8104854 | -0,68 | -1,60 | 0,27458 | -1,30 | -2,46 | 0,00681 | ---          | C12orf63   |
| 7957688 | -0,68 | -1,60 | 0,01030 | -0,75 | -1,68 | 0,04091 | NM_198520    | CCDC19     |
| 7921473 | -0,68 | -1,60 | 0,16622 | -0,45 | -1,37 | 0,11605 | NM_012337    | C12orf37   |
| 7957503 | -0,68 | -1,60 | 0,27871 | -0,95 | -1,93 | 0,00041 | AK058107     | ---        |
| 8150866 | -0,68 | -1,60 | 0,07283 | -1,62 | -3,07 | 0,00168 | ---          | ---        |
| 8030879 | -0,68 | -1,60 | 0,17552 | -1,17 | -2,25 | 0,04773 | ---          | COL24A1    |
| 7917370 | -0,68 | -1,60 | 0,00045 | -0,92 | -1,89 | 0,01193 | NM_152890    | ---        |
| 7940987 | -0,68 | -1,60 | 0,11019 | -2,25 | -4,75 | 0,00003 | ---          | ---        |
| 8040547 | -0,68 | -1,60 | 0,16114 | -1,14 | -2,20 | 0,01892 | ---          | VCX3A      |
| 8171216 | -0,68 | -1,60 | 0,31021 | -1,17 | -2,25 | 0,00130 | NM_016379    | OR10G2     |
| 7977771 | -0,68 | -1,60 | 0,29048 | -2,56 | -5,88 | 0,00248 | NM_001005466 | NCOR2      |
| 7959772 | -0,68 | -1,60 | 0,17909 | -0,42 | -1,34 | 0,09713 | NM_006312    | ---        |
| 8150586 | -0,68 | -1,60 | 0,13523 | -0,80 | -1,74 | 0,00644 | ---          | ---        |
| 7982375 | -0,68 | -1,60 | 0,03759 | -1,05 | -2,07 | 0,06039 | ---          | ---        |
| 8052089 | -0,68 | -1,60 | 0,05892 | -1,12 | -2,18 | 0,07141 | ---          | GRIK1      |
| 8069770 | -0,68 | -1,60 | 0,04356 | -0,79 | -1,73 | 0,00108 | NM_175611    | RTP3       |
| 8079415 | -0,68 | -1,60 | 0,12116 | -0,78 | -1,72 | 0,00507 | NM_031440    | ---        |
| 8115074 | -0,68 | -1,60 | 0,04876 | -0,67 | -1,59 | 0,01889 | ---          | DEFB109P1B |
| 8149380 | -0,68 | -1,60 | 0,43340 | -1,08 | -2,12 | 0,13508 | NR_003668    | LCE1B      |
| 7905525 | -0,68 | -1,60 | 0,02102 | -0,89 | -1,86 | 0,00144 | NM_178349    | SLC15A2    |
| 8082012 | -0,68 | -1,60 | 0,22012 | -0,86 | -1,82 | 0,01741 | NM_021082    | ---        |
| 7910138 | -0,68 | -1,60 | 0,04960 | -0,99 | -1,99 | 0,07403 | ---          | ICAM3      |
| 8033987 | -0,68 | -1,60 | 0,04043 | 0,64  | 1,56  | 0,01452 | NM_002162    | C3orf24    |
| 8085283 | -0,68 | -1,60 | 0,36537 | -1,22 | -2,33 | 0,02639 | NM_173472    | ---        |
| 7990078 | -0,68 | -1,60 | 0,08120 | -1,38 | -2,60 | 0,08069 | ---          | ---        |
| 8146377 | -0,68 | -1,60 | 0,14290 | -1,01 | -2,02 | 0,00096 | ---          | OR6N2      |
| 7921429 | -0,68 | -1,60 | 0,47267 | -1,97 | -3,91 | 0,00828 | NM_001005278 | ---        |
| 8177269 | -0,68 | -1,60 | 0,49522 | -0,65 | -1,56 | 0,07740 | ---          | ABCA12     |
| 8058708 | -0,68 | -1,60 | 0,03280 | -0,72 | -1,65 | 0,00447 | NM_173076    | ---        |
| 8036589 | -0,68 | -1,60 | 0,07547 | -0,45 | -1,36 | 0,02520 | ---          | FAM27C     |
| 8155497 | -0,68 | -1,60 | 0,51026 | -1,94 | -3,84 | 0,01378 | NR_027421    | ---        |
| 8107348 | -0,68 | -1,60 | 0,07337 | -0,86 | -1,81 | 0,00055 | ---          | TJP3       |
| 8024687 | -0,68 | -1,60 | 0,17219 | 0,58  | 1,49  | 0,33599 | NM_014428    | ---        |

|                     |       |       |         |       |       |         |                                     |                  |  |
|---------------------|-------|-------|---------|-------|-------|---------|-------------------------------------|------------------|--|
| 8065134             | -0,68 | -1,60 | 0,05653 | -0,62 | -1,54 | 0,04055 | ---                                 | ---              |  |
| 8124057             | -0,68 | -1,60 | 0,01875 | -1,02 | -2,03 | 0,02277 | ---                                 | DZIP1L           |  |
| 8090938             | -0,68 | -1,60 | 0,05764 | -1,49 | -2,81 | 0,00665 | NM_173543                           | RET              |  |
| 7927120             | -0,68 | -1,60 | 0,03577 | -0,74 | -1,67 | 0,00942 | NM_020975                           | LOC388946        |  |
| 8041804             | -0,68 | -1,60 | 0,03582 | -1,06 | -2,08 | 0,04191 | NM_001145051                        | GRM8             |  |
| 8142718             | -0,68 | -1,60 | 0,33978 | -1,19 | -2,28 | 0,00107 | NM_001127323                        | EFCAB3           |  |
| 8008995             | -0,68 | -1,60 | 0,04597 | -1,25 | -2,38 | 0,00957 | NM_173503                           | HIST1H2BL        |  |
| 8124510             | -0,68 | -1,60 | 0,13261 | 1,88  | 3,67  | 0,00619 | NM_003519                           | TBC1D2B          |  |
| 7985224             | -0,68 | -1,60 | 0,52482 | 0,12  | 1,09  | 0,88245 | NM_144572                           | CHRFAM7A         |  |
| 7987012             | -0,68 | -1,60 | 0,05399 | 0,21  | 1,16  | 0,54199 | NM_139320                           | GALT             |  |
| 8154916             | -0,68 | -1,60 | 0,14012 | 0,04  | 1,03  | 0,79545 | NM_000155                           | TBCC             |  |
| 8126442             | -0,68 | -1,60 | 0,14644 | 0,04  | 1,03  | 0,92647 | NM_003192                           | ---              |  |
| 7921930             | -0,68 | -1,60 | 0,17387 | -0,62 | -1,53 | 0,02600 | ---                                 | COL21A1          |  |
| 8127201             | -0,68 | -1,60 | 0,09156 | -1,22 | -2,33 | 0,00057 | NM_030820                           | PDZK1            |  |
| 7904843             | -0,68 | -1,60 | 0,01476 | -0,87 | -1,83 | 0,02598 | NM_002614                           | ---              |  |
| 7988175             | -0,68 | -1,60 | 0,04871 | -1,04 | -2,05 | 0,06134 | ---                                 | ---              |  |
| 7988206             | -0,68 | -1,60 | 0,04871 | -1,04 | -2,05 | 0,06134 | ---                                 | ZNF276           |  |
| 7998002             | -0,68 | -1,60 | 0,03157 | 1,97  | 3,91  | 0,00025 | NM_152287                           | HTN3             |  |
| 8095430             | -0,68 | -1,60 | 0,14689 | -1,47 | -2,78 | 0,01778 | NM_000200                           | C1QTNF2          |  |
| 8115594             | -0,68 | -1,60 | 0,02046 | -0,40 | -1,32 | 0,23357 | NM_031908                           | SLC45A3          |  |
| 7923792             | -0,68 | -1,60 | 0,22559 | -1,15 | -2,21 | 0,01279 | NM_033102                           | BAHCC1           |  |
| 8010590             | -0,68 | -1,60 | 0,32540 | -0,13 | -1,10 | 0,74779 | NM_001080519                        | MMP28            |  |
| 8014282             | -0,68 | -1,60 | 0,05572 | -0,86 | -1,81 | 0,07880 | NM_024302                           | NKX2-5           |  |
| 8115840             | -0,68 | -1,60 | 0,03521 | -0,72 | -1,65 | 0,21310 | NM_004387                           | CACNG2           |  |
| 8075820             | -0,68 | -1,60 | 0,09711 | -0,54 | -1,45 | 0,00461 | NM_006078                           | ---              |  |
| 7988410             | -0,68 | -1,60 | 0,05357 | -0,68 | -1,61 | 0,00919 | ---                                 | ---              |  |
| 8092220             | -0,68 | -1,60 | 0,00117 | -1,34 | -2,54 | 0,00839 | ---                                 | CD6              |  |
| 7940391             | -0,68 | -1,60 | 0,11298 | -0,80 | -1,74 | 0,00036 | NM_006725                           | C20orf107        |  |
| 8063531             | -0,68 | -1,60 | 0,21282 | 0,31  | 1,24  | 0,03873 | BC105792 LCN10                      |                  |  |
| 8165271             | -0,68 | -1,60 | 0,21545 | -0,39 | -1,31 | 0,49454 | NM_001001712                        | CCR5             |  |
| 8079401             | -0,68 | -1,60 | 0,02721 | -0,93 | -1,90 | 0,01182 | NM_000579                           | CCR5             |  |
| 8093298             | -0,68 | -1,60 | 0,02721 | -0,93 | -1,90 | 0,01182 | NM_000579                           | GNL1             |  |
| 8178346             | -0,68 | -1,60 | 0,13943 | -0,43 | -1,35 | 0,45614 | NM_005275                           | DOCK6            |  |
| 8025850             | -0,68 | -1,60 | 0,26738 | -0,77 | -1,70 | 0,00052 | NM_020812                           | LOC100131232     |  |
| 7949568             | -0,68 | -1,60 | 0,24184 | -2,20 | -4,60 | 0,00673 | AK090761                            | ---              |  |
| 8009515             | -0,68 | -1,60 | 0,00065 | -1,07 | -2,09 | 0,04024 | ---                                 | BTBD16           |  |
| 7931062             | -0,68 | -1,60 | 0,08907 | -0,62 | -1,54 | 0,02800 | NM_144587                           | LGALS9C          |  |
| 8005458             | -0,68 | -1,60 | 0,07166 | -1,52 | -2,87 | 0,04372 | NM_001040078                        | ---              |  |
| 7934991             | -0,68 | -1,60 | 0,00273 | -1,24 | -2,36 | 0,02608 | ---                                 | IGKC // IGKC     |  |
| 8043436             | -0,68 | -1,60 | 0,41023 | -0,88 | -1,84 | 0,03605 | BC073772 // BC073772                | MOG              |  |
| 8177709             | -0,68 | -1,60 | 0,03368 | -1,49 | -2,81 | 0,00527 | NM_206809                           | MED9             |  |
| 8005260             | -0,68 | -1,60 | 0,01320 | -1,24 | -2,36 | 0,00614 | NM_018019                           | ---              |  |
| 7911681             | -0,68 | -1,60 | 0,07039 | -0,82 | -1,76 | 0,02248 | ---                                 | KRT32            |  |
| 8015293             | -0,68 | -1,60 | 0,15091 | -0,81 | -1,75 | 0,05536 | NM_002278                           | CCDC89           |  |
| 7950804             | -0,68 | -1,60 | 0,19745 | -1,32 | -2,50 | 0,02468 | NM_152723                           | ---              |  |
| 8020421             | -0,68 | -1,60 | 0,11331 | -0,28 | -1,21 | 0,33536 | ---                                 | ATF5             |  |
| 8030557             | -0,68 | -1,60 | 0,06988 | 0,51  | 1,42  | 0,16944 | NM_012068                           | CYTH2            |  |
| 8030064             | -0,68 | -1,60 | 0,27147 | -0,17 | -1,13 | 0,71503 | NM_017457                           | CLEC3B           |  |
| 8079305             | -0,68 | -1,60 | 0,10976 | -1,58 | -2,98 | 0,00240 | NM_003278                           | C6orf124         |  |
| 8130817             | -0,68 | -1,60 | 0,08629 | -0,26 | -1,19 | 0,10384 | NR_027906                           | MANEAL           |  |
| 7900183             | -0,68 | -1,60 | 0,14130 | 1,66  | 3,16  | 0,00445 | NM_001031740                        | CHIC1            |  |
| 8168399             | -0,68 | -1,60 | 0,00025 | -0,44 | -1,36 | 0,12373 | NM_001039840                        | GALNT3           |  |
| 8056408             | -0,68 | -1,60 | 0,21672 | 0,73  | 1,65  | 0,01383 | NM_004482                           | FAM163B          |  |
| 8164937             | -0,68 | -1,60 | 0,13233 | -0,76 | -1,70 | 0,07115 | BC146946                            | ---              |  |
| 8089255             | -0,68 | -1,60 | 0,33812 | -0,69 | -1,61 | 0,19501 | ---                                 | ---              |  |
| 8047767             | -0,68 | -1,60 | 0,01668 | -0,99 | -1,98 | 0,08862 | ---                                 | ---              |  |
| 8043038             | -0,68 | -1,60 | 0,04532 | -0,61 | -1,52 | 0,01544 | ---                                 | C9orf50          |  |
| 8164562             | -0,68 | -1,60 | 0,27388 | -1,34 | -2,52 | 0,05149 | NM_199350                           | TMEM127          |  |
| 8053901             | -0,68 | -1,60 | 0,09771 | 0,84  | 1,79  | 0,09864 | NM_017849                           | ---              |  |
| 7917647             | -0,68 | -1,61 | 0,19201 | -0,50 | -1,41 | 0,22559 | ---                                 | NDST4            |  |
| 8102450             | -0,68 | -1,61 | 0,11782 | -0,85 | -1,80 | 0,00087 | NM_022569                           | KIAA0556         |  |
| 7994308             | -0,68 | -1,61 | 0,15434 | -0,05 | -1,04 | 0,64505 | NM_015202                           | PTPRC            |  |
| 7908553             | -0,68 | -1,61 | 0,04213 | -1,02 | -2,03 | 0,00283 | NM_002838                           | DCDC1            |  |
| 7947322             | -0,68 | -1,61 | 0,10295 | -0,54 | -1,45 | 0,00450 | NM_181807                           | OR1F2P // OR1F2P |  |
| // OR1F2P // OR1F2P |       |       |         |       |       |         |                                     |                  |  |
| 7992865             | -0,68 | -1,61 | 0,45425 | 1,11  | 2,16  | 0,01105 | NR_002169 // NR_002169 // NR_002169 |                  |  |
| // NR_002169        |       |       |         |       |       |         |                                     |                  |  |
| 7908591             | -0,68 | -1,61 | 0,37226 | -1,28 | -2,42 | 0,05818 | ---                                 | EARS2            |  |
| 8000310             | -0,68 | -1,61 | 0,03236 | 0,02  | 1,01  | 0,96330 | NM_001083614                        | GOLGA6L10        |  |
| 7990894             | -0,68 | -1,61 | 0,54048 | -1,00 | -1,99 | 0,02131 | NM_001164465                        | SYT2             |  |
| 7923442             | -0,68 | -1,61 | 0,07320 | -1,61 | -3,06 | 0,00177 | NM_177402                           | ---              |  |
| 8137582             | -0,68 | -1,61 | 0,06715 | -0,98 | -1,97 | 0,00099 | ---                                 | RP11-429E11.3    |  |
| 8067358             | -0,68 | -1,61 | 0,08825 | -0,88 | -1,84 | 0,01518 | ENST00000317652                     | SEMA4D           |  |

|         |       |       |         |       |        |         |                 |              |
|---------|-------|-------|---------|-------|--------|---------|-----------------|--------------|
| 8162236 | -0,68 | -1,61 | 0,14482 | 0,59  | 1,51   | 0,13774 | NM_006378       | LRRC9        |
| 7974737 | -0,68 | -1,61 | 0,08671 | -1,21 | -2,31  | 0,03202 | ENST00000254271 | ---          |
| 8114579 | -0,68 | -1,61 | 0,01235 | -0,49 | -1,41  | 0,03843 | ---             | OR5K1        |
| 8081210 | -0,68 | -1,61 | 0,04533 | -1,01 | -2,01  | 0,02478 | NM_001004736    | ---          |
| 7922992 | -0,68 | -1,61 | 0,13120 | -1,26 | -2,39  | 0,01751 | ---             | DDX43        |
| 8120679 | -0,68 | -1,61 | 0,03313 | 0,46  | 1,38   | 0,07260 | NM_018665       | ZC3H3        |
| 8153411 | -0,68 | -1,61 | 0,06546 | 0,50  | 1,41   | 0,34028 | NM_015117       | FYB          |
| 8111739 | -0,68 | -1,61 | 0,04477 | -1,17 | -2,25  | 0,00847 | NM_001465       | IL3          |
| 8107878 | -0,68 | -1,61 | 0,03118 | -0,76 | -1,69  | 0,00040 | NM_000588       | DSG1         |
| 8020724 | -0,68 | -1,61 | 0,06546 | -0,49 | -1,40  | 0,02045 | NM_001942       | OR4P4        |
| 7939928 | -0,68 | -1,61 | 0,05549 | -0,61 | -1,53  | 0,00937 | NM_001004124    | SHISA6       |
| 8004948 | -0,68 | -1,61 | 0,23550 | -1,18 | -2,27  | 0,00225 | NM_207386       | ---          |
| 7924840 | -0,68 | -1,61 | 0,08379 | -1,16 | -2,23  | 0,13889 | ---             | OR11H4       |
| 7973034 | -0,68 | -1,61 | 0,06511 | -1,03 | -2,04  | 0,00213 | NM_001004479    | HIGD2B       |
| 7990227 | -0,68 | -1,61 | 0,11669 | -1,06 | -2,08  | 0,01053 | NR_002780       | NICN1        |
| 8087433 | -0,68 | -1,61 | 0,26786 | -0,12 | -1,09  | 0,41444 | NM_032316       | ANKRD45      |
| 7922382 | -0,68 | -1,61 | 0,02895 | -0,80 | -1,74  | 0,01008 | NM_198493       | CXorf50B     |
| 8168391 | -0,68 | -1,61 | 0,13819 | 0,45  | 1,37   | 0,39855 | NR_026594       | OR10D1P      |
| 7944825 | -0,68 | -1,61 | 0,26457 | -1,63 | -3,11  | 0,03115 | X64981 RNU5A    |              |
| 7984257 | -0,68 | -1,61 | 0,24971 | -1,50 | -2,83  | 0,02799 | NR_002756       | CDHR1        |
| 7928770 | -0,69 | -1,61 | 0,01177 | 0,05  | 1,04   | 0,55227 | NM_033100       | GRIA4        |
| 7943530 | -0,69 | -1,61 | 0,03258 | -1,15 | -2,21  | 0,00639 | NM_000829       | SNORD115-21  |
| 7982048 | -0,69 | -1,61 | 0,00118 | -1,64 | -3,11  | 0,01348 | NR_003313       | GGT3P        |
| 8074316 | -0,69 | -1,61 | 0,07289 | -1,30 | -2,47  | 0,10331 | NR_003267       | ---          |
| 8132463 | -0,69 | -1,61 | 0,06281 | -1,46 | -2,74  | 0,00093 | ---             | SDR42E1      |
| 8003060 | -0,69 | -1,61 | 0,01421 | 2,24  | 4,73   | 0,00113 | NM_145168       | LILRB3       |
| 8039196 | -0,69 | -1,61 | 0,21972 | -0,59 | -1,51  | 0,07957 | NM_001081450    | ---          |
| 7983648 | -0,69 | -1,61 | 0,36853 | -1,01 | -2,02  | 0,05726 | ---             | ---          |
| 8006028 | -0,69 | -1,61 | 0,03822 | -0,30 | -1,23  | 0,04229 | ---             | OR5B12       |
| 7948328 | -0,69 | -1,61 | 0,07418 | -1,28 | -2,43  | 0,00506 | NM_001004733    | ZNF397OS     |
| 8022872 | -0,69 | -1,61 | 0,14793 | 0,72  | 1,65   | 0,12047 | NM_001112734    | CPNE9        |
| 8077572 | -0,69 | -1,61 | 0,01240 | -0,48 | -1,39  | 0,04063 | NM_153635       | GADD45B      |
| 8024485 | -0,69 | -1,61 | 0,07138 | 1,10  | 2,14   | 0,01124 | NM_015675       | BTN1A1       |
| 8117498 | -0,69 | -1,61 | 0,09777 | -1,01 | -2,01  | 0,01683 | NM_001732       | HCRTR2       |
| 8120342 | -0,69 | -1,61 | 0,00171 | -0,77 | -1,70  | 0,01409 | NM_001526       | ---          |
| 7979365 | -0,69 | -1,61 | 0,20864 | -1,17 | -2,26  | 0,01926 | ---             | TMEM204      |
| 7992293 | -0,69 | -1,61 | 0,03146 | -1,13 | -2,20  | 0,00185 | NM_024600       | LOC100190938 |
| 8015706 | -0,69 | -1,61 | 0,08358 | -1,29 | -2,44  | 0,00031 | NR_024461       | ---          |
| 7923424 | -0,69 | -1,61 | 0,09930 | -0,67 | -1,59  | 0,00035 | ---             | IL1RL2       |
| 8044008 | -0,69 | -1,61 | 0,02515 | -0,84 | -1,79  | 0,04224 | NM_003854       | ---          |
| 7911341 | -0,69 | -1,61 | 0,38878 | -4,65 | -25,16 | 0,00189 | ---             | SLC22A25     |
| 7948957 | -0,69 | -1,61 | 0,11176 | -2,00 | -4,01  | 0,00030 | NM_199352       | KRT31        |
| 8015273 | -0,69 | -1,61 | 0,08944 | -1,62 | -3,08  | 0,06172 | NM_002277       | CNTNAP3      |
| 8155540 | -0,69 | -1,61 | 0,01039 | 0,69  | 1,62   | 0,09786 | NM_033655       | CNTNAP3      |
| 8161460 | -0,69 | -1,61 | 0,01039 | 0,69  | 1,62   | 0,09786 | NM_033655       | OR2AG2       |
| 7946278 | -0,69 | -1,61 | 0,20491 | -0,82 | -1,76  | 0,05221 | NM_001004490    | VAX1         |
| 7936552 | -0,69 | -1,61 | 0,23511 | -1,20 | -2,29  | 0,01784 | NM_199131       | ADAD1        |
| 8097236 | -0,69 | -1,61 | 0,13644 | -1,38 | -2,60  | 0,00210 | NM_139243       | ---          |
| 7936318 | -0,69 | -1,61 | 0,02749 | -0,82 | -1,76  | 0,00083 | ---             | HLA-DPB1     |
| 8118594 | -0,69 | -1,61 | 0,09127 | 1,25  | 2,39   | 0,01724 | NM_002121       | PIM2         |
| 8172471 | -0,69 | -1,61 | 0,12588 | 1,71  | 3,27   | 0,05093 | NM_006875       | IRS1         |
| 8059470 | -0,69 | -1,61 | 0,01307 | 1,19  | 2,28   | 0,13212 | NM_005544       | PNPLA1       |
| 8119052 | -0,69 | -1,61 | 0,06993 | -1,34 | -2,53  | 0,00063 | NM_173676       | PRAMEF17     |
| 7898048 | -0,69 | -1,61 | 0,16107 | -1,74 | -3,34  | 0,00133 | NM_001099851    | SMPDL3B      |
| 7899407 | -0,69 | -1,61 | 0,11302 | 2,93  | 7,60   | 0,00523 | NM_014474       | ---          |
| 7927874 | -0,69 | -1,61 | 0,32863 | -1,08 | -2,11  | 0,00353 | ---             | ---          |
| 7927265 | -0,69 | -1,61 | 0,01070 | -1,09 | -2,13  | 0,00060 | ---             | ---          |
| 7927517 | -0,69 | -1,61 | 0,01070 | -1,09 | -2,13  | 0,00060 | ---             | ---          |
| 7933595 | -0,69 | -1,61 | 0,01070 | -1,09 | -2,13  | 0,00060 | ---             | SNORA46      |
| 8001746 | -0,69 | -1,61 | 0,11037 | -0,17 | -1,12  | 0,18511 | NR_002978       | ARL9         |
| 8095246 | -0,69 | -1,61 | 0,03562 | -1,15 | -2,22  | 0,01588 | NM_206919       | CHRN2        |
| 7905817 | -0,69 | -1,61 | 0,09245 | -1,64 | -3,11  | 0,00244 | NM_000748       | ---          |
| 7969477 | -0,69 | -1,61 | 0,27480 | -1,24 | -2,36  | 0,00543 | ---             | SBSN         |
| 8036103 | -0,69 | -1,61 | 0,08195 | 0,16  | 1,12   | 0,82127 | NM_001166034    | ---          |
| 7909999 | -0,69 | -1,61 | 0,00335 | -0,86 | -1,81  | 0,00802 | ---             | ---          |
| 7967872 | -0,69 | -1,61 | 0,08883 | -0,51 | -1,42  | 0,08069 | ---             | ---          |
| 8142017 | -0,69 | -1,61 | 0,07648 | -0,83 | -1,78  | 0,09734 | ---             | CLEC1A       |
| 7961111 | -0,69 | -1,61 | 0,00830 | -1,01 | -2,02  | 0,00019 | NM_016511       | NCRNA00029   |
| 8067588 | -0,69 | -1,61 | 0,09670 | -1,47 | -2,76  | 0,02495 | NR_028295       | VWC2L        |
| 8048112 | -0,69 | -1,61 | 0,12291 | -0,95 | -1,93  | 0,05675 | NM_001080500    | KCNK2        |
| 7909730 | -0,69 | -1,61 | 0,09612 | -0,66 | -1,58  | 0,00070 | NM_001017425    | EMID2        |
| 8135099 | -0,69 | -1,61 | 0,24561 | -1,88 | -3,68  | 0,01288 | NM_133457       | ---          |
| 8068608 | -0,69 | -1,61 | 0,05160 | -0,85 | -1,80  | 0,00440 | ---             | FAM65C       |

|         |       |       |         |       |       |         |                 |          |          |
|---------|-------|-------|---------|-------|-------|---------|-----------------|----------|----------|
| 8066985 | -0,69 | -1,61 | 0,01585 | -0,99 | -1,98 | 0,04547 | AK299337        | MIR154   |          |
| 7976850 | -0,69 | -1,61 | 0,04510 | -0,22 | -1,17 | 0,19737 | NR_029704       |          | RAD9B    |
| 7958677 | -0,69 | -1,61 | 0,05683 | -0,67 | -1,59 | 0,02806 | NM_152442       |          | BPY2     |
| 8176821 | -0,69 | -1,61 | 0,15080 | -1,28 | -2,42 | 0,06026 | NM_004678       |          | BPY2     |
| 8176867 | -0,69 | -1,61 | 0,15080 | -1,28 | -2,42 | 0,06026 | NM_004678       |          | BPY2     |
| 8177449 | -0,69 | -1,61 | 0,15080 | -1,28 | -2,42 | 0,06026 | NM_004678       |          | RAB9B    |
| 8174271 | -0,69 | -1,61 | 0,22937 | -1,28 | -2,42 | 0,00367 | NM_016370       |          | ---      |
| 8016016 | -0,69 | -1,61 | 0,45457 | -1,59 | -3,01 | 0,00058 | ---             | C3orf34  |          |
| 8093145 | -0,69 | -1,61 | 0,07646 | -0,26 | -1,19 | 0,38205 | NM_032898       |          | C16orf13 |
| 7998251 | -0,69 | -1,61 | 0,11108 | -0,61 | -1,53 | 0,16505 | NM_032366       |          | C17orf78 |
| 8006706 | -0,69 | -1,61 | 0,06035 | -0,76 | -1,69 | 0,07365 | NM_173625       |          | DUSP4    |
| 8150076 | -0,69 | -1,61 | 0,01824 | 0,51  | 1,42  | 0,14945 | NM_001394       |          | ---      |
| 7980889 | -0,69 | -1,61 | 0,02584 | -0,94 | -1,91 | 0,00969 | ---             | GOLGA9P  |          |
| 7982256 | -0,69 | -1,61 | 0,39052 | -0,86 | -1,82 | 0,00420 | NR_024074       |          | TBR1     |
| 8045962 | -0,69 | -1,61 | 0,06057 | -2,02 | -4,07 | 0,00315 | NM_006593       |          | ---      |
| 7976646 | -0,69 | -1,61 | 0,13660 | -0,41 | -1,33 | 0,03502 | ---             | ---      |          |
| 8091279 | -0,69 | -1,61 | 0,09305 | -0,57 | -1,48 | 0,07659 | ---             | XIRP1    |          |
| 8086341 | -0,69 | -1,61 | 0,21946 | -1,81 | -3,50 | 0,00184 | NM_194293       |          | CNNM1    |
| 7929732 | -0,69 | -1,61 | 0,03430 | 0,95  | 1,93  | 0,01607 | NM_020348       |          | FLJ40453 |
| 8109995 | -0,69 | -1,61 | 0,05486 | -1,26 | -2,39 | 0,02110 | AK097772        | ---      |          |
| 8081427 | -0,69 | -1,61 | 0,12400 | -0,70 | -1,62 | 0,00021 | ---             | ---      |          |
| 8043682 | -0,69 | -1,61 | 0,42251 | -0,11 | -1,08 | 0,90280 | ---             | C12orf55 |          |
| 7957673 | -0,69 | -1,61 | 0,04177 | -0,62 | -1,54 | 0,10835 | ENST00000298953 |          | PLA2G12B |
| 7934271 | -0,69 | -1,61 | 0,05387 | -0,76 | -1,69 | 0,04537 | NM_032562       |          | C2orf57  |
| 8049079 | -0,69 | -1,61 | 0,10346 | -1,07 | -2,10 | 0,08815 | NM_152614       |          | MAGEA9   |
| 8170407 | -0,69 | -1,61 | 0,12967 | -1,10 | -2,14 | 0,01403 | NM_005365       |          | MAGEA9   |
| 8175611 | -0,69 | -1,61 | 0,12967 | -1,10 | -2,14 | 0,01403 | NM_005365       |          | ---      |
| 8086350 | -0,69 | -1,61 | 0,09624 | -0,83 | -1,78 | 0,04905 | ---             | ---      |          |
| 8147038 | -0,69 | -1,61 | 0,00490 | -0,63 | -1,54 | 0,08056 | ---             | SPATA24  |          |
| 8114518 | -0,69 | -1,61 | 0,26703 | -0,74 | -1,67 | 0,02925 | NM_194296       |          | BFSP1    |
| 8065124 | -0,69 | -1,61 | 0,13981 | -0,32 | -1,25 | 0,29182 | NM_001195       |          | ---      |
| 8108566 | -0,69 | -1,61 | 0,17071 | -0,61 | -1,53 | 0,00609 | ---             | ALS2CL   |          |
| 8086627 | -0,69 | -1,61 | 0,02833 | -0,37 | -1,29 | 0,49030 | NM_147129       |          | HRK      |
| 7966746 | -0,69 | -1,61 | 0,33207 | 0,97  | 1,96  | 0,01628 | NM_003806       |          | ZNF691   |
| 7900624 | -0,69 | -1,61 | 0,02399 | 0,33  | 1,26  | 0,24202 | NM_015911       |          | KLRC4    |
| 7961166 | -0,69 | -1,61 | 0,03596 | -0,93 | -1,91 | 0,09133 | NM_013431       |          | SEMA4G   |
| 7929882 | -0,69 | -1,61 | 0,16033 | 1,21  | 2,32  | 0,02070 | NM_017893       |          | ---      |
| 8116400 | -0,69 | -1,61 | 0,01865 | -0,70 | -1,63 | 0,02649 | ---             | RLN1     |          |
| 8159981 | -0,69 | -1,61 | 0,00714 | -0,43 | -1,35 | 0,00298 | NM_006911       |          | ---      |
| 7938681 | -0,69 | -1,61 | 0,01753 | -0,68 | -1,60 | 0,29909 | ---             | PTGDS    |          |
| 8159521 | -0,69 | -1,61 | 0,24773 | -1,74 | -3,34 | 0,00238 | NM_000954       |          | A1CF     |
| 7933640 | -0,69 | -1,61 | 0,05429 | -1,03 | -2,04 | 0,02037 | NM_138933       |          | ---      |
| 7950532 | -0,69 | -1,61 | 0,09462 | -1,26 | -2,40 | 0,00015 | ---             | RNASE2   |          |
| 7973110 | -0,69 | -1,61 | 0,04652 | -1,70 | -3,24 | 0,05817 | NM_002934       |          | S100Z    |
| 8106411 | -0,69 | -1,61 | 0,01187 | -0,58 | -1,50 | 0,00828 | NM_130772       |          | ---      |
| 8062204 | -0,69 | -1,61 | 0,24072 | -2,26 | -4,80 | 0,00175 | ---             | ---      |          |
| 7906465 | -0,69 | -1,61 | 0,21989 | -0,38 | -1,30 | 0,25645 | ---             | PAX2     |          |
| 7929840 | -0,69 | -1,61 | 0,10040 | -1,00 | -2,00 | 0,00612 | NM_003987       |          | SP3P     |
| 7972247 | -0,69 | -1,61 | 0,15681 | -1,31 | -2,48 | 0,00008 | BC036697        | ARHGFE5  |          |
| 8136987 | -0,69 | -1,61 | 0,03143 | 0,79  | 1,73  | 0,05520 | NM_005435       |          | ADAM33   |
| 8064686 | -0,69 | -1,61 | 0,21697 | -0,53 | -1,45 | 0,07028 | NM_025220       |          | MIR129-1 |
| 8135907 | -0,69 | -1,61 | 0,01898 | -1,18 | -2,26 | 0,00720 | NR_029596       |          | FOXR1    |
| 7944351 | -0,69 | -1,61 | 0,05046 | -1,16 | -2,23 | 0,06715 | NM_181721       |          | POTEE    |
| 8045257 | -0,69 | -1,61 | 0,09726 | -1,72 | -3,30 | 0,00070 | NM_001083538    |          | ANKK1    |
| 7943943 | -0,69 | -1,61 | 0,17824 | -1,02 | -2,02 | 0,03958 | NM_178510       |          | ---      |
| 8120878 | -0,69 | -1,61 | 0,10634 | -1,09 | -2,13 | 0,01329 | ---             | HOXD3    |          |
| 8046560 | -0,69 | -1,61 | 0,22124 | -0,95 | -1,93 | 0,06931 | NM_006898       |          | CXorf57  |
| 8169158 | -0,69 | -1,61 | 0,05652 | -0,84 | -1,79 | 0,00167 | NM_018015       |          | PCSK2    |
| 8061094 | -0,69 | -1,61 | 0,02164 | -1,15 | -2,22 | 0,00291 | NM_002594       |          | ---      |
| 8117170 | -0,69 | -1,61 | 0,04030 | -1,16 | -2,24 | 0,04825 | ---             | GPIHBP1  |          |
| 8148591 | -0,69 | -1,61 | 0,15783 | -0,51 | -1,42 | 0,09204 | NM_178172       |          | ---      |
| 7989126 | -0,69 | -1,61 | 0,07070 | -0,66 | -1,58 | 0,01155 | ---             | HEXDC    |          |
| 8010787 | -0,69 | -1,61 | 0,06740 | -0,69 | -1,61 | 0,00601 | NM_173620       |          | C1orf173 |
| 7917019 | -0,69 | -1,61 | 0,08124 | -0,72 | -1,65 | 0,03962 | NM_001002912    |          | ---      |
| 8142444 | -0,69 | -1,61 | 0,06477 | -1,07 | -2,10 | 0,00426 | ---             | REG1A    |          |
| 8042986 | -0,69 | -1,61 | 0,12515 | -0,89 | -1,86 | 0,02484 | NM_002909       |          | C1orf69  |
| 7910261 | -0,69 | -1,61 | 0,04128 | -0,69 | -1,61 | 0,00129 | NM_001010867    |          | KIAA0040 |
| 7922474 | -0,69 | -1,62 | 0,03971 | 1,27  | 2,42  | 0,00020 | NM_014656       |          | PHLDB3   |
| 8037315 | -0,69 | -1,62 | 0,19405 | -1,09 | -2,13 | 0,02695 | NM_198850       |          | OR5M11   |
| 7948144 | -0,69 | -1,62 | 0,31333 | -1,71 | -3,28 | 0,00427 | NM_001005245    |          | TAT      |
| 8002556 | -0,69 | -1,62 | 0,04580 | -0,92 | -1,89 | 0,02943 | NM_000353       |          | HPSE     |
| 8101449 | -0,69 | -1,62 | 0,05724 | 0,80  | 1,74  | 0,03719 | NM_006665       |          | RNF151   |
| 7992409 | -0,69 | -1,62 | 0,32850 | -0,87 | -1,83 | 0,01736 | NM_174903       |          | ---      |

|                      |                                  |       |         |       |       |         |                 |                 |
|----------------------|----------------------------------|-------|---------|-------|-------|---------|-----------------|-----------------|
| 8054295              | -0,69                            | -1,62 | 0,20540 | -1,05 | -2,08 | 0,10742 | ---             | ---             |
| 7969366              | -0,69                            | -1,62 | 0,09399 | -0,98 | -1,97 | 0,01936 | ---             | UBTFL1          |
| 7939893              | -0,69                            | -1,62 | 0,26020 | -1,05 | -2,07 | 0,00213 | NM_001143975    | AFM             |
| 8095663              | -0,69                            | -1,62 | 0,18787 | -0,86 | -1,81 | 0,02331 | NM_0011133      | ---             |
| 8056972              | -0,69                            | -1,62 | 0,04551 | -0,91 | -1,87 | 0,02444 | ---             | F12             |
| 8116033              | -0,69                            | -1,62 | 0,07971 | -0,19 | -1,14 | 0,50140 | NM_000505       | ZNF586          |
| 8031821              | -0,69                            | -1,62 | 0,05031 | -0,53 | -1,44 | 0,11753 | NM_017652       | PRAMEF10 //     |
| PRAMEF10 // PRAMEF10 |                                  |       |         |       |       |         |                 |                 |
| 7898020              | -0,69                            | -1,62 | 0,15175 | -1,64 | -3,11 | 0,00697 | NM_001039361 // | NM_001039361 // |
| NM_001039361         | PRAMEF10 // PRAMEF10 // PRAMEF10 |       |         |       |       |         |                 |                 |
| 7898034              | -0,69                            | -1,62 | 0,15175 | -1,64 | -3,11 | 0,00697 | NM_001039361 // | NM_001039361 // |
| NM_001039361         | SLC26A9                          |       |         |       |       |         |                 |                 |
| 7923850              | -0,69                            | -1,62 | 0,04957 | -0,04 | -1,03 | 0,78065 | NM_052934       | MMP8            |
| 7951246              | -0,69                            | -1,62 | 0,05246 | -1,89 | -3,71 | 0,00528 | NM_002424       | LOC392364       |
| 8162191              | -0,69                            | -1,62 | 0,36118 | -1,66 | -3,17 | 0,00025 | BC086877        | ---             |
| 7957954              | -0,69                            | -1,62 | 0,05973 | -0,92 | -1,89 | 0,00012 | ---             | ---             |
| 8132415              | -0,69                            | -1,62 | 0,05585 | -0,99 | -1,99 | 0,00788 | ---             | SCARNA16        |
| 8010137              | -0,69                            | -1,62 | 0,14426 | -0,33 | -1,26 | 0,39833 | NR_003013       | ---             |
| 8048173              | -0,69                            | -1,62 | 0,37999 | -2,26 | -4,79 | 0,00001 | ---             | ---             |
| 8177280              | -0,69                            | -1,62 | 0,05216 | -0,98 | -1,97 | 0,00568 | ---             | MIR30D          |
| 8153067              | -0,69                            | -1,62 | 0,03924 | -1,20 | -2,29 | 0,01201 | NR_029599       | ---             |
| 7943917              | -0,69                            | -1,62 | 0,03342 | -1,25 | -2,38 | 0,02258 | ---             | RFNG            |
| 8019367              | -0,69                            | -1,62 | 0,09360 | 0,94  | 1,91  | 0,10454 | NM_002917       | TMEM207         |
| 8092735              | -0,69                            | -1,62 | 0,00737 | -1,34 | -2,54 | 0,00066 | NM_207316       | C6orf122        |
| 8130934              | -0,69                            | -1,62 | 0,00982 | -1,18 | -2,26 | 0,00826 | NR_026781       | ZNF562          |
| 8033801              | -0,69                            | -1,62 | 0,18189 | 0,26  | 1,20  | 0,33771 | NM_001130031    | DDO             |
| 8128843              | -0,69                            | -1,62 | 0,00326 | -2,09 | -4,25 | 0,00339 | NM_003649       | C22orf23        |
| 8075981              | -0,69                            | -1,62 | 0,19192 | -0,07 | -1,05 | 0,62417 | CR456440        | GHRHR           |
| 8132130              | -0,69                            | -1,62 | 0,17391 | -1,94 | -3,83 | 0,03163 | NM_000823       | RPS9            |
| 8031152              | -0,69                            | -1,62 | 0,28905 | 0,87  | 1,82  | 0,12584 | NM_001013       | GBP5            |
| 7917576              | -0,69                            | -1,62 | 0,08262 | -0,84 | -1,79 | 0,02001 | NM_052942       | KRT27           |
| 8015087              | -0,69                            | -1,62 | 0,05458 | -0,93 | -1,90 | 0,01950 | NM_181537       | IL21            |
| 8102707              | -0,69                            | -1,62 | 0,02086 | -0,59 | -1,51 | 0,03530 | NM_021803       | GSTTP1          |
| 8074988              | -0,69                            | -1,62 | 0,40671 | -0,93 | -1,91 | 0,28811 | NR_003081       | GABRA2          |
| 8100109              | -0,69                            | -1,62 | 0,00654 | -0,87 | -1,83 | 0,05247 | NM_000807       | COL9A1          |
| 8127446              | -0,69                            | -1,62 | 0,10335 | -1,41 | -2,65 | 0,00697 | NM_001851       | SLAMF6          |
| 7921625              | -0,69                            | -1,62 | 0,04778 | -2,08 | -4,22 | 0,00043 | NM_052931       | PI16            |
| 8119124              | -0,69                            | -1,62 | 0,24931 | -1,33 | -2,52 | 0,00372 | NM_153370       | ECHDC2          |
| 7916229              | -0,69                            | -1,62 | 0,25142 | 0,19  | 1,14  | 0,38710 | NM_018281       | F13A1           |
| 8123744              | -0,69                            | -1,62 | 0,08613 | 3,53  | 11,56 | 0,00035 | NM_000129       | INSL6           |
| 8159971              | -0,70                            | -1,62 | 0,08266 | -1,13 | -2,20 | 0,02923 | NM_007179       | psiTPT22        |
| 8071063              | -0,70                            | -1,62 | 0,00500 | -1,03 | -2,04 | 0,00321 | NR_001591       | ---             |
| 8040068              | -0,70                            | -1,62 | 0,17890 | -0,97 | -1,96 | 0,04045 | ---             | SLAIN1          |
| 7969533              | -0,70                            | -1,62 | 0,00185 | 2,39  | 5,23  | 0,01434 | NM_001040153    | KRT16P3         |
| 8013465              | -0,70                            | -1,62 | 0,34648 | -1,72 | -3,29 | 0,00434 | NR_029393       | ARRDC1          |
| 8159692              | -0,70                            | -1,62 | 0,23067 | 2,22  | 4,67  | 0,00687 | NM_152285       | TRBV21OR9-2     |
| 8154838              | -0,70                            | -1,62 | 0,17396 | -1,58 | -2,98 | 0,00500 | ENST00000331828 | GABRA3          |
| 8175696              | -0,70                            | -1,62 | 0,03238 | -0,95 | -1,93 | 0,00098 | NM_000808       | ---             |
| 8122259              | -0,70                            | -1,62 | 0,56574 | -1,14 | -2,20 | 0,46393 | ---             | ---             |
| 8154572              | -0,70                            | -1,62 | 0,05654 | -1,16 | -2,24 | 0,00157 | ---             | METT5D1         |
| 7939072              | -0,70                            | -1,62 | 0,28429 | -0,30 | -1,23 | 0,51208 | NM_152636       | OR51A7          |
| 7937982              | -0,70                            | -1,62 | 0,19468 | -0,87 | -1,82 | 0,00378 | NM_001004749    | ---             |
| 8112196              | -0,70                            | -1,62 | 0,02499 | -1,34 | -2,53 | 0,02768 | ---             | ---             |
| 8171723              | -0,70                            | -1,62 | 0,24802 | -1,18 | -2,27 | 0,00446 | ---             | KLF16           |
| 8032365              | -0,70                            | -1,62 | 0,05175 | 1,26  | 2,40  | 0,14096 | NM_031918       | TMEM129         |
| 8098916              | -0,70                            | -1,62 | 0,08646 | 1,60  | 3,03  | 0,15688 | NM_001127266    | C9orf3          |
| 8156549              | -0,70                            | -1,62 | 0,03598 | -0,32 | -1,25 | 0,11451 | NM_032823       | ---             |
| 8115812              | -0,70                            | -1,62 | 0,04270 | -1,01 | -2,01 | 0,01278 | ---             | RFPL4A          |
| 8031570              | -0,70                            | -1,62 | 0,27336 | -0,91 | -1,88 | 0,00399 | NM_001145014    | C1orf129        |
| 7907232              | -0,70                            | -1,62 | 0,17661 | -1,50 | -2,84 | 0,10092 | NM_025063       | ---             |
| 8141358              | -0,70                            | -1,62 | 0,18249 | -0,60 | -1,51 | 0,03389 | ---             | LCT             |
| 8055406              | -0,70                            | -1,62 | 0,06788 | -0,66 | -1,58 | 0,02300 | NM_002299       | ---             |
| 7958209              | -0,70                            | -1,62 | 0,05807 | -0,89 | -1,86 | 0,07263 | ---             | LAMC3           |
| 8158739              | -0,70                            | -1,62 | 0,06728 | -0,17 | -1,13 | 0,71530 | NM_006059       | CYP2B7P1        |
| 8028955              | -0,70                            | -1,62 | 0,06505 | -0,16 | -1,12 | 0,61322 | NR_001278       | OR7A10          |
| 8034897              | -0,70                            | -1,62 | 0,06239 | -1,19 | -2,29 | 0,01474 | NM_001005190    | DENND2A         |
| 8143397              | -0,70                            | -1,62 | 0,13998 | -1,60 | -3,04 | 0,00144 | NM_015689       | ---             |
| 7983989              | -0,70                            | -1,62 | 0,01595 | -1,05 | -2,07 | 0,00329 | ---             | TLL2            |
| 7935296              | -0,70                            | -1,62 | 0,01303 | -0,37 | -1,30 | 0,16581 | NM_012465       | FAM153B         |
| 8116130              | -0,70                            | -1,62 | 0,06908 | -0,67 | -1,59 | 0,08944 | NM_001079529    | TUBB4           |
| 8025051              | -0,70                            | -1,62 | 0,14185 | -1,07 | -2,11 | 0,03367 | NM_006087       | OR9Q2           |
| 7940112              | -0,70                            | -1,62 | 0,28605 | -1,75 | -3,37 | 0,01542 | NM_001005283    | FAM70A          |
| 8174767              | -0,70                            | -1,62 | 0,00809 | -0,84 | -1,79 | 0,00860 | NM_017938       | LECT1           |

|         |       |       |         |       |       |         |                 |             |
|---------|-------|-------|---------|-------|-------|---------|-----------------|-------------|
| 7971838 | -0,70 | -1,62 | 0,05299 | -0,34 | -1,27 | 0,02432 | NM_007015       | ---         |
| 8153035 | -0,70 | -1,62 | 0,03083 | -1,26 | -2,39 | 0,00396 | ---             | TBC1D3      |
| 8006746 | -0,70 | -1,62 | 0,35114 | 1,41  | 2,65  | 0,04535 | NM_001123391    | KIAA0125    |
| 7977440 | -0,70 | -1,62 | 0,13272 | -1,73 | -3,31 | 0,00830 | NR_026800       | MKRN9P      |
| 7965245 | -0,70 | -1,62 | 0,10078 | -0,85 | -1,80 | 0,02139 | NR_033410       | GABRR2      |
| 8128099 | -0,70 | -1,62 | 0,19047 | -1,35 | -2,55 | 0,00409 | NM_002043       | CCDC73      |
| 7947375 | -0,70 | -1,62 | 0,12169 | -1,18 | -2,26 | 0,00696 | NM_001008391    | RAD54L      |
| 7901192 | -0,70 | -1,62 | 0,08262 | 0,25  | 1,19  | 0,57441 | NM_003579       | ---         |
| 8030840 | -0,70 | -1,62 | 0,00557 | -1,04 | -2,06 | 0,02527 | ---             | HRH4        |
| 8020684 | -0,70 | -1,62 | 0,05873 | -1,27 | -2,42 | 0,03381 | NM_021624       | ---         |
| 8131438 | -0,70 | -1,62 | 0,20970 | -0,32 | -1,25 | 0,51228 | ---             | CCDC54      |
| 8081462 | -0,70 | -1,62 | 0,09588 | -0,87 | -1,83 | 0,01575 | NM_032600       | ---         |
| 8103238 | -0,70 | -1,62 | 0,26150 | -0,83 | -1,78 | 0,06717 | ---             | ---         |
| 7969424 | -0,70 | -1,62 | 0,00106 | -0,88 | -1,84 | 0,02886 | ---             | OR52N5      |
| 7946105 | -0,70 | -1,62 | 0,40619 | -1,91 | -3,76 | 0,00144 | NM_001001922    | SCARF2      |
| 8074617 | -0,70 | -1,62 | 0,12976 | -1,37 | -2,59 | 0,02871 | NM_153334       | LY6G6C      |
| 8125042 | -0,70 | -1,62 | 0,19070 | -1,14 | -2,21 | 0,12595 | NM_025261       | ---         |
| 7937876 | -0,70 | -1,62 | 0,46156 | -0,93 | -1,91 | 0,01072 | ---             | TMEM71      |
| 8152976 | -0,70 | -1,62 | 0,03674 | -1,17 | -2,26 | 0,00003 | NM_144649       | IFNA5       |
| 8160401 | -0,70 | -1,62 | 0,10151 | -1,02 | -2,03 | 0,00242 | NM_002169       | WASH2P      |
| 8044649 | -0,70 | -1,62 | 0,31951 | 0,93  | 1,91  | 0,00936 | NR_024077       | RS1         |
| 8171579 | -0,70 | -1,62 | 0,08644 | -0,78 | -1,72 | 0,03033 | NM_000330       | KRT25       |
| 8015070 | -0,70 | -1,62 | 0,23603 | -1,32 | -2,49 | 0,00044 | NM_181534       | ---         |
| 8145529 | -0,70 | -1,62 | 0,19188 | -0,96 | -1,94 | 0,11016 | ---             | BAI1        |
| 8148517 | -0,70 | -1,62 | 0,27020 | -0,47 | -1,39 | 0,08434 | NM_001702       | FAM177B     |
| 7909946 | -0,70 | -1,62 | 0,01302 | -0,47 | -1,38 | 0,01233 | NM_207468       | C2orf46     |
| 8050115 | -0,70 | -1,62 | 0,06365 | -0,78 | -1,71 | 0,01139 | AK127578        | ---         |
| 8158145 | -0,70 | -1,62 | 0,29437 | -0,69 | -1,61 | 0,01994 | ---             | ---         |
| 8105603 | -0,70 | -1,62 | 0,08694 | -1,40 | -2,64 | 0,00002 | ---             | DNAI1       |
| 8154892 | -0,70 | -1,62 | 0,02269 | -0,65 | -1,57 | 0,00972 | NM_012144       | JMJD5       |
| 8000411 | -0,70 | -1,62 | 0,33910 | 0,50  | 1,42  | 0,25769 | NM_001145348    | ---         |
| 8104926 | -0,70 | -1,62 | 0,01971 | -1,03 | -2,04 | 0,00092 | ---             | LIPK        |
| 7928994 | -0,70 | -1,62 | 0,06704 | -0,52 | -1,43 | 0,14423 | NM_001080518    | UGT3A2      |
| 8111524 | -0,70 | -1,62 | 0,07239 | -0,69 | -1,61 | 0,21902 | NM_174914       | C4orf6      |
| 8093872 | -0,70 | -1,62 | 0,03230 | -1,56 | -2,95 | 0,00645 | NM_005750       | ---         |
| 8061068 | -0,70 | -1,62 | 0,15652 | -1,11 | -2,16 | 0,01963 | ---             | ---         |
| 8054393 | -0,70 | -1,62 | 0,01614 | -0,90 | -1,86 | 0,00436 | ---             | CSMD3       |
| 8152376 | -0,70 | -1,62 | 0,03835 | -1,20 | -2,30 | 0,00031 | NM_198124       | RBP2        |
| 8091071 | -0,70 | -1,62 | 0,09106 | -0,70 | -1,63 | 0,00142 | NM_004164       | ---         |
| 8088903 | -0,70 | -1,62 | 0,45496 | -2,73 | -6,64 | 0,01039 | ---             | C2orf165    |
| 8066609 | -0,70 | -1,62 | 0,22473 | -0,39 | -1,31 | 0,17909 | NM_080608       | SNHG11      |
| 8062480 | -0,70 | -1,62 | 0,03778 | 0,22  | 1,16  | 0,52542 | NR_003239       | TBC1D3G     |
| 8019716 | -0,70 | -1,62 | 0,36113 | 1,29  | 2,44  | 0,07112 | NM_001040282    | ---         |
| 8112664 | -0,70 | -1,62 | 0,00511 | -0,62 | -1,53 | 0,01667 | ---             | OR51G2      |
| 7946011 | -0,70 | -1,62 | 0,10309 | -1,71 | -3,28 | 0,00007 | NM_001005238    | VCX3B       |
| 8165890 | -0,70 | -1,62 | 0,27442 | -1,05 | -2,07 | 0,00288 | NM_001001888    | LOC349196   |
| 8144412 | -0,70 | -1,62 | 0,60334 | -1,47 | -2,77 | 0,10267 | NR_027000       | LOC349196   |
| 8144414 | -0,70 | -1,62 | 0,60334 | -1,47 | -2,77 | 0,10267 | NR_027000       | GREB1       |
| 8040292 | -0,70 | -1,62 | 0,04868 | -0,17 | -1,12 | 0,40219 | NM_014668       | SNORD115-14 |
| 7982034 | -0,70 | -1,62 | 0,07785 | -0,88 | -1,84 | 0,02472 | NR_003306       | NLRC3       |
| 7998983 | -0,70 | -1,63 | 0,12118 | -1,54 | -2,91 | 0,00330 | NM_178844       | SLCO6A1     |
| 8113385 | -0,70 | -1,63 | 0,00729 | -1,09 | -2,13 | 0,01348 | NM_173488       | SULT1A3     |
| 7994781 | -0,70 | -1,63 | 0,11735 | 0,82  | 1,77  | 0,03909 | NM_003166       | PTPN23      |
| 8079532 | -0,70 | -1,63 | 0,11619 | 1,06  | 2,08  | 0,04315 | NM_015466       | MIR140      |
| 7997008 | -0,70 | -1,63 | 0,05334 | -1,26 | -2,40 | 0,02977 | NR_029681       | OR5M1       |
| 7948150 | -0,70 | -1,63 | 0,12005 | -1,26 | -2,40 | 0,00189 | NM_001004740    | ---         |
| 8176482 | -0,70 | -1,63 | 0,40135 | -1,45 | -2,73 | 0,10712 | ---             | FAM138D     |
| 7960172 | -0,70 | -1,63 | 0,11155 | -1,82 | -3,52 | 0,00776 | AY341951        | FAM110A     |
| 8060370 | -0,70 | -1,63 | 0,05755 | 0,14  | 1,10  | 0,79589 | NM_031424       | SSX2        |
| 8167728 | -0,70 | -1,63 | 0,28006 | -1,70 | -3,25 | 0,01839 | NM_003147       | RFPL3       |
| 8072605 | -0,70 | -1,63 | 0,18961 | -0,21 | -1,16 | 0,47512 | NM_001098535    | MED26       |
| 8035187 | -0,70 | -1,63 | 0,01324 | -0,30 | -1,23 | 0,27291 | NM_004831       | OCM         |
| 8131349 | -0,70 | -1,63 | 0,13095 | -0,54 | -1,46 | 0,03523 | NM_001097622    | ---         |
| 8040614 | -0,70 | -1,63 | 0,20225 | -1,26 | -2,40 | 0,01397 | ---             | PSTPIP1     |
| 7985099 | -0,70 | -1,63 | 0,00189 | -0,87 | -1,83 | 0,00433 | NM_003978       | LCE2B       |
| 7905505 | -0,70 | -1,63 | 0,24903 | -1,12 | -2,18 | 0,03000 | NM_014357       | ---         |
| 7901383 | -0,70 | -1,63 | 0,02125 | -0,90 | -1,86 | 0,00572 | ---             | OR4H12P     |
| 7973006 | -0,70 | -1,63 | 0,28760 | -2,77 | -6,83 | 0,00622 | ENST00000316004 | ADSSL1      |
| 7977273 | -0,70 | -1,63 | 0,22021 | 1,18  | 2,27  | 0,01008 | NM_152328       | ---         |
| 7971359 | -0,70 | -1,63 | 0,01581 | -1,21 | -2,31 | 0,07983 | ---             | ---         |
| 8110104 | -0,70 | -1,63 | 0,06368 | -0,80 | -1,74 | 0,10663 | ---             | FTMT        |
| 8107576 | -0,70 | -1,63 | 0,06431 | -1,03 | -2,04 | 0,02397 | NM_177478       | FDXR        |
| 8018236 | -0,70 | -1,63 | 0,02192 | -0,02 | -1,01 | 0,96991 | NM_024417       | LRP11       |

|              |           |       |         |       |       |         |                 |              |
|--------------|-----------|-------|---------|-------|-------|---------|-----------------|--------------|
| 8130142      | -0,70     | -1,63 | 0,30409 | 0,93  | 1,91  | 0,04821 | NM_032832       | PRL          |
| 8124185      | -0,70     | -1,63 | 0,14875 | -1,11 | -2,15 | 0,00804 | NM_000948       | ABHD11       |
| 8140129      | -0,70     | -1,63 | 0,06763 | 0,64  | 1,55  | 0,30428 | NR_026912       | SMC1B        |
| 8076704      | -0,70     | -1,63 | 0,00297 | -0,50 | -1,42 | 0,08994 | NM_148674       | ---          |
| 8130626      | -0,70     | -1,63 | 0,49127 | -2,49 | -5,62 | 0,02352 | ---             | EPHA1        |
| 8143575      | -0,70     | -1,63 | 0,04904 | -0,12 | -1,09 | 0,58334 | NM_005232       | TNMD         |
| 8168737      | -0,70     | -1,63 | 0,23868 | -0,55 | -1,46 | 0,03926 | NM_022144       | LRSAM1       |
| 8158028      | -0,70     | -1,63 | 0,17175 | 0,16  | 1,12  | 0,57914 | NM_138361       | UBN1         |
| 7993035      | -0,70     | -1,63 | 0,07555 | 0,20  | 1,15  | 0,23603 | NM_016936       | SC65         |
| 8015432      | -0,70     | -1,63 | 0,01306 | -0,11 | -1,08 | 0,79391 | NM_006455       | DEFB135      |
| 8144687      | -0,70     | -1,63 | 0,00333 | -1,05 | -2,08 | 0,02597 | NM_001033017    | HRCT1        |
| 8155167      | -0,70     | -1,63 | 0,04063 | -0,15 | -1,11 | 0,16159 | NM_001039792    | GNGT1        |
| 8134252      | -0,70     | -1,63 | 0,09768 | -1,05 | -2,08 | 0,10390 | NM_021955       | METT11D1     |
| 7973116      | -0,70     | -1,63 | 0,01114 | 1,77  | 3,42  | 0,00933 | NM_001029991    | LY6G6C       |
| 8179814      | -0,70     | -1,63 | 0,17141 | -1,27 | -2,41 | 0,09890 | NM_025261       | ANAPC2       |
| 8165462      | -0,70     | -1,63 | 0,03263 | 0,33  | 1,26  | 0,55826 | NM_013366       | LRFN3        |
| 8028112      | -0,70     | -1,63 | 0,10387 | -0,26 | -1,20 | 0,37584 | NM_024509       | CLDN16       |
| 8084788      | -0,70     | -1,63 | 0,11479 | 0,64  | 1,55  | 0,11753 | NM_006580       | TEKT1        |
| 8011990      | -0,70     | -1,63 | 0,02875 | -0,50 | -1,41 | 0,07071 | NM_053285       | ---          |
| 8128445      | -0,70     | -1,63 | 0,47933 | -1,26 | -2,40 | 0,07190 | ---             | ---          |
| 8048116      | -0,70     | -1,63 | 0,10359 | 0,68  | 1,60  | 0,21196 | ---             | ---          |
| 8173605      | -0,70     | -1,63 | 0,16048 | -0,89 | -1,86 | 0,00205 | ---             | ---          |
| 8124335      | -0,70     | -1,63 | 0,22765 | -0,67 | -1,59 | 0,06467 | ---             | HHEX         |
| 7929282      | -0,70     | -1,63 | 0,21247 | -0,89 | -1,85 | 0,15363 | NM_002729       | FLYWCH2      |
| 7992737      | -0,70     | -1,63 | 0,18240 | 0,01  | 1,01  | 0,95710 | NM_138439       | TBC1D16      |
| 8019031      | -0,70     | -1,63 | 0,11823 | -0,70 | -1,63 | 0,26198 | NM_019020       | HSP90AB6P    |
| 7972420      | -0,70     | -1,63 | 0,06636 | -1,14 | -2,21 | 0,03409 | AY956767        | ---          |
| 8098437      | -0,70     | -1,63 | 0,01469 | -1,17 | -2,25 | 0,02415 | ---             | FSCN3        |
| 8135865      | -0,70     | -1,63 | 0,00514 | -0,88 | -1,84 | 0,04728 | NM_020369       | TTY10        |
| 8177261      | -0,70     | -1,63 | 0,18795 | -0,19 | -1,14 | 0,12691 | NR_001542       | FER1L6       |
| 8148220      | -0,70     | -1,63 | 0,00321 | -1,17 | -2,25 | 0,00013 | NM_001039112    | CDO1         |
| 8113641      | -0,70     | -1,63 | 0,00640 | -0,96 | -1,95 | 0,01079 | NM_001801       | PCNT         |
| 8069348      | -0,70     | -1,63 | 0,00566 | 0,24  | 1,18  | 0,12862 | NM_006031       | MGC45800     |
| 8103853      | -0,70     | -1,63 | 0,17142 | -1,89 | -3,70 | 0,00136 | NR_027107       | KIAA0319     |
| 8124240      | -0,70     | -1,63 | 0,12196 | 0,13  | 1,09  | 0,71053 | NM_014809       | FCRL1        |
| 7921319      | -0,70     | -1,63 | 0,04528 | -1,46 | -2,75 | 0,00779 | NM_052938       | ---          |
| 8104305      | -0,70     | -1,63 | 0,37398 | -2,43 | -5,39 | 0,00325 | ---             | XKRY         |
| 8176675      | -0,70     | -1,63 | 0,01970 | -0,66 | -1,58 | 0,00219 | NM_004677       | XKRY         |
| 8177180      | -0,70     | -1,63 | 0,01970 | -0,66 | -1,58 | 0,00219 | NM_004677       | FAM84B       |
| 8152812      | -0,70     | -1,63 | 0,01891 | 1,44  | 2,72  | 0,01931 | NM_174911       | LOC168474 // |
| LOC168474 // | LOC168474 |       |         |       |       |         |                 |              |
| 8139826      | -0,70     | -1,63 | 0,17490 | -0,30 | -1,23 | 0,26976 | NR_002789 //    | NR_002789 // |
| ---          |           |       |         |       |       |         |                 |              |
| 7900405      | -0,70     | -1,63 | 0,04378 | -1,35 | -2,54 | 0,00035 | ---             | MIR30C1      |
| 7900490      | -0,71     | -1,63 | 0,06766 | -1,10 | -2,14 | 0,00610 | NR_029833       | LOC100129112 |
| 8017344      | -0,71     | -1,63 | 0,11306 | 1,68  | 3,21  | 0,01279 | AK123839        | ---          |
| 7901359      | -0,71     | -1,63 | 0,00543 | -0,66 | -1,58 | 0,00731 | ---             | ---          |
| 8113664      | -0,71     | -1,63 | 0,09638 | -0,85 | -1,80 | 0,02095 | ---             | TBC1D26      |
| 8005117      | -0,71     | -1,63 | 0,29639 | -1,46 | -2,75 | 0,05390 | NM_178571       | AGFG2        |
| 8134834      | -0,71     | -1,63 | 0,10553 | -0,76 | -1,70 | 0,05407 | NM_006076       | CCM2         |
| 8132646      | -0,71     | -1,63 | 0,04279 | 1,00  | 2,00  | 0,02270 | NM_031443       | C5orf46      |
| 8114970      | -0,71     | -1,63 | 0,03221 | -1,47 | -2,78 | 0,00004 | NM_206966       | ---          |
| 8171311      | -0,71     | -1,63 | 0,14822 | -2,11 | -4,32 | 0,02661 | ---             | C1orf137     |
| 7904281      | -0,71     | -1,63 | 0,06383 | -1,30 | -2,47 | 0,00558 | ENST00000369482 | MACROD2      |
| 8061035      | -0,71     | -1,63 | 0,05828 | -1,06 | -2,09 | 0,00127 | NM_080676       | LOC441177    |
| 8123334      | -0,71     | -1,63 | 0,04484 | -1,49 | -2,81 | 0,00224 | NR_027284       | ---          |
| 7925128      | -0,71     | -1,63 | 0,19264 | -0,52 | -1,44 | 0,13405 | ---             | LOC348840    |
| 8093272      | -0,71     | -1,63 | 0,00810 | -1,05 | -2,07 | 0,02390 | NR_003291       | PLGLB2       |
| 8043367      | -0,71     | -1,63 | 0,15674 | 0,10  | 1,07  | 0,51796 | NM_002665       | PLGLB2       |
| 8053602      | -0,71     | -1,63 | 0,15674 | 0,10  | 1,07  | 0,51796 | NM_002665       | ---          |
| 8155246      | -0,71     | -1,63 | 0,20018 | -1,07 | -2,10 | 0,04744 | ---             | SLC7A14      |
| 8092055      | -0,71     | -1,63 | 0,07535 | -2,26 | -4,77 | 0,00196 | NM_020949       | UTS2         |
| 7912136      | -0,71     | -1,63 | 0,00093 | -0,91 | -1,89 | 0,02424 | NM_021995       | TRAF1        |
| 8163825      | -0,71     | -1,63 | 0,03253 | -0,41 | -1,33 | 0,06075 | NM_005658       | RHBDL3       |
| 8006367      | -0,71     | -1,63 | 0,22206 | -1,07 | -2,09 | 0,06715 | NM_138328       | C9orf173     |
| 8159646      | -0,71     | -1,63 | 0,13494 | -1,14 | -2,20 | 0,02264 | NM_001004353    | CXorf24      |
| 8167163      | -0,71     | -1,63 | 0,11520 | -0,42 | -1,34 | 0,17899 | ENST00000357412 | ESYT3        |
| 8082974      | -0,71     | -1,63 | 0,02462 | 0,91  | 1,88  | 0,00159 | NM_031913       | TMEM14E      |
| 8091546      | -0,71     | -1,63 | 0,01810 | -0,57 | -1,48 | 0,03267 | NM_001123228    | TUBA8        |
| 8071147      | -0,71     | -1,63 | 0,07143 | 0,17  | 1,13  | 0,72438 | NM_018943       | C14orf177    |
| 7976635      | -0,71     | -1,63 | 0,05477 | -0,75 | -1,69 | 0,11011 | NM_182560       | NCF2         |
| 7922773      | -0,71     | -1,63 | 0,03695 | -1,19 | -2,28 | 0,00248 | NM_000433       | ---          |
| 7969358      | -0,71     | -1,63 | 0,09299 | -0,63 | -1,55 | 0,01449 | ---             | GPR32        |

|         |       |       |         |       |       |         |              |           |
|---------|-------|-------|---------|-------|-------|---------|--------------|-----------|
| 8030733 | -0,71 | -1,63 | 0,00567 | -1,11 | -2,16 | 0,00559 | NM_001506    | PITPNM3   |
| 8011924 | -0,71 | -1,63 | 0,02361 | -0,60 | -1,52 | 0,10210 | NM_031220    | ACADS     |
| 7959220 | -0,71 | -1,63 | 0,06492 | -0,43 | -1,35 | 0,40196 | NM_000017    | RP1       |
| 8146468 | -0,71 | -1,63 | 0,07181 | -1,06 | -2,09 | 0,10776 | NM_006269    | PGM5      |
| 8044640 | -0,71 | -1,63 | 0,34200 | -1,00 | -2,00 | 0,00067 | NM_021965    | KRBA2     |
| 8012466 | -0,71 | -1,63 | 0,08779 | -1,36 | -2,56 | 0,02562 | NM_213597    | CYP2A13   |
| 8028973 | -0,71 | -1,63 | 0,10835 | -1,90 | -3,73 | 0,00977 | NM_000766    | GTSCR1    |
| 8023816 | -0,71 | -1,63 | 0,02256 | -1,17 | -2,25 | 0,02867 | AY262164     | ---       |
| 7926354 | -0,71 | -1,63 | 0,02760 | -1,31 | -2,48 | 0,01382 | ---          | C20orf114 |
| 8061894 | -0,71 | -1,63 | 0,06570 | -0,30 | -1,23 | 0,09702 | NM_033197    | TERT      |
| 8110783 | -0,71 | -1,63 | 0,25942 | -0,38 | -1,30 | 0,46842 | NM_198253    | HOMER2    |
| 7991034 | -0,71 | -1,63 | 0,09786 | 0,98  | 1,97  | 0,01940 | NM_199330    | CDC48     |
| 7900167 | -0,71 | -1,63 | 0,01967 | 1,29  | 2,45  | 0,02628 | NM_018101    | ---       |
| 7938047 | -0,71 | -1,63 | 0,01084 | -1,63 | -3,09 | 0,00161 | ---          | SIGLEC15  |
| 8021091 | -0,71 | -1,63 | 0,10603 | -0,87 | -1,82 | 0,06439 | NM_213602    | KIAA1024  |
| 7985248 | -0,71 | -1,63 | 0,06408 | 0,95  | 1,93  | 0,02045 | NM_015206    | IGHV4-31  |
| 7981601 | -0,71 | -1,63 | 0,07793 | -1,40 | -2,63 | 0,00020 | AK301335     | HLA-DQB1  |
| 8125447 | -0,71 | -1,63 | 0,00230 | -0,18 | -1,13 | 0,71603 | NM_002123    | CLDND2    |
| 8038804 | -0,71 | -1,63 | 0,36331 | -0,88 | -1,84 | 0,23341 | NM_152353    | HIST1H2BE |
| 8117389 | -0,71 | -1,63 | 0,01085 | -0,88 | -1,84 | 0,11399 | NM_003523    | NFE2      |
| 7963760 | -0,71 | -1,63 | 0,12257 | -0,52 | -1,43 | 0,04756 | NM_001136023 | FAM48B2   |
| 8166509 | -0,71 | -1,63 | 0,42184 | -0,49 | -1,40 | 0,29720 | NM_001136233 | FAM48B2   |
| 8171844 | -0,71 | -1,63 | 0,42184 | -0,49 | -1,40 | 0,29720 | NM_001136233 | SNTG2     |
| 8039977 | -0,71 | -1,63 | 0,08517 | -1,24 | -2,37 | 0,03886 | NM_018968    | ZFHX2     |
| 7978059 | -0,71 | -1,63 | 0,00371 | -0,32 | -1,25 | 0,38126 | BC131533     | SNORA1    |
| 7951032 | -0,71 | -1,63 | 0,03815 | -1,92 | -3,80 | 0,02580 | NR_003026    | OR5M3     |
| 7939988 | -0,71 | -1,63 | 0,12163 | -1,86 | -3,63 | 0,16012 | NM_001004742 | ---       |
| 8149590 | -0,71 | -1,64 | 0,06674 | -1,64 | -3,11 | 0,11412 | ---          | ---       |
| 8147650 | -0,71 | -1,64 | 0,05135 | -1,15 | -2,21 | 0,04436 | ---          | NOTCH3    |
| 8034940 | -0,71 | -1,64 | 0,09984 | 0,64  | 1,56  | 0,23438 | NM_000435    | CNGB1     |
| 8001615 | -0,71 | -1,64 | 0,06781 | -1,14 | -2,21 | 0,02009 | NM_001297    | CCNF      |
| 7992594 | -0,71 | -1,64 | 0,03400 | 0,62  | 1,54  | 0,30228 | NM_001761    | MIR124-2  |
| 8146643 | -0,71 | -1,64 | 0,11809 | -1,67 | -3,19 | 0,05320 | NR_029669    | FAM186B   |
| 7963084 | -0,71 | -1,64 | 0,06260 | -0,41 | -1,33 | 0,11304 | NM_032130    | DSP       |
| 8116780 | -0,71 | -1,64 | 0,00023 | 2,67  | 6,37  | 0,00056 | NM_004415    | OLFM4     |
| 7969288 | -0,71 | -1,64 | 0,03487 | -1,15 | -2,23 | 0,02460 | NM_006418    | ---       |
| 7928298 | -0,71 | -1,64 | 0,00291 | -0,74 | -1,67 | 0,16275 | ---          | PLCB2     |
| 7987475 | -0,71 | -1,64 | 0,01409 | -0,76 | -1,70 | 0,06184 | NM_004573    | GJA8      |
| 7904927 | -0,71 | -1,64 | 0,04907 | -1,93 | -3,80 | 0,00025 | NM_005267    | ---       |
| 7974212 | -0,71 | -1,64 | 0,09856 | -1,18 | -2,26 | 0,00398 | ---          | ---       |
| 8065853 | -0,71 | -1,64 | 0,01958 | -0,70 | -1,63 | 0,00243 | ---          | WSCD2     |
| 7958398 | -0,71 | -1,64 | 0,07871 | -0,72 | -1,65 | 0,02448 | NM_014653    | MIR34B    |
| 7943736 | -0,71 | -1,64 | 0,22939 | -0,27 | -1,21 | 0,11371 | NR_029839    | ---       |
| 8002301 | -0,71 | -1,64 | 0,43892 | -2,02 | -4,07 | 0,00088 | ---          | PREX2     |
| 8146794 | -0,71 | -1,64 | 0,04952 | -1,00 | -2,00 | 0,05269 | NM_024870    | SLC22A13  |
| 8078759 | -0,71 | -1,64 | 0,09445 | -1,59 | -3,01 | 0,01190 | NM_004256    | SLC35E2   |
| 7911591 | -0,71 | -1,64 | 0,22106 | 1,20  | 2,31  | 0,07584 | NM_001110781 | MSTO2P    |
| 7906056 | -0,71 | -1,64 | 0,24734 | 1,78  | 3,43  | 0,01796 | NR_024117    | TMEM35    |
| 8168790 | -0,71 | -1,64 | 0,10962 | -1,76 | -3,40 | 0,05754 | NM_021637    | SCN10A    |
| 8086255 | -0,71 | -1,64 | 0,00556 | -0,99 | -1,99 | 0,01176 | NM_006514    | LHX8      |
| 7902353 | -0,71 | -1,64 | 0,01501 | -1,26 | -2,39 | 0,00882 | NM_001001933 | LOC728855 |
| 7919394 | -0,71 | -1,64 | 0,12373 | -0,71 | -1,64 | 0,08171 | NR_024510    | SIRPG     |
| 8064485 | -0,71 | -1,64 | 0,07206 | -1,54 | -2,90 | 0,00047 | NM_018556    | CTAGE6    |
| 8136936 | -0,71 | -1,64 | 0,11000 | -0,59 | -1,51 | 0,03297 | NM_178561    | SPRR3     |
| 7905548 | -0,71 | -1,64 | 0,05290 | -1,08 | -2,11 | 0,00095 | NM_005416    | TACC2     |
| 7931031 | -0,71 | -1,64 | 0,05942 | 0,30  | 1,23  | 0,25879 | NM_206862    | ---       |
| 7993935 | -0,71 | -1,64 | 0,01676 | -0,72 | -1,65 | 0,08729 | ---          | ZNF615    |
| 8038925 | -0,71 | -1,64 | 0,13096 | 0,07  | 1,05  | 0,78995 | NM_198480    | PRSS3     |
| 8154848 | -0,71 | -1,64 | 0,26522 | -0,52 | -1,43 | 0,02881 | NM_007343    | ARL4A     |
| 8131573 | -0,71 | -1,64 | 0,13589 | -1,25 | -2,37 | 0,00151 | NM_212460    | FHDC1     |
| 8097829 | -0,71 | -1,64 | 0,19342 | -0,06 | -1,05 | 0,77401 | NM_033393    | S1PR3     |
| 8156278 | -0,71 | -1,64 | 0,13863 | -1,70 | -3,26 | 0,00005 | NM_005226    | LOC730441 |
| 8143494 | -0,71 | -1,64 | 0,11962 | -0,87 | -1,83 | 0,04536 | BC039387     | ---       |
| 8151766 | -0,71 | -1,64 | 0,09217 | -1,49 | -2,81 | 0,00001 | ---          | C4orf17   |
| 8096568 | -0,71 | -1,64 | 0,14925 | -0,93 | -1,90 | 0,02425 | NM_032149    | ---       |
| 7919303 | -0,71 | -1,64 | 0,10745 | -1,92 | -3,78 | 0,00356 | ---          | ---       |
| 8020682 | -0,71 | -1,64 | 0,01034 | -0,82 | -1,77 | 0,00009 | ---          | IL22RA2   |
| 8129848 | -0,71 | -1,64 | 0,14506 | -1,28 | -2,42 | 0,00316 | NM_052962    | ---       |
| 8023375 | -0,71 | -1,64 | 0,00387 | -0,56 | -1,47 | 0,21009 | ---          | MS4A1     |
| 7940287 | -0,71 | -1,64 | 0,00211 | -1,26 | -2,40 | 0,01575 | NM_152866    | GFOD2     |
| 8002082 | -0,71 | -1,64 | 0,05116 | 0,46  | 1,37  | 0,11890 | NM_030819    | NEURL     |
| 7930264 | -0,71 | -1,64 | 0,19290 | -0,05 | -1,03 | 0,83729 | NM_004210    | HIST1H2AL |
| 8117608 | -0,71 | -1,64 | 0,04765 | -0,04 | -1,03 | 0,81467 | NM_003511    | ---       |



|         |       |       |         |       |       |         |                 |              |  |
|---------|-------|-------|---------|-------|-------|---------|-----------------|--------------|--|
| 8056043 | -0,71 | -1,64 | 0,06107 | -1,22 | -2,32 | 0,00017 | ---             | CNO          |  |
| 8093957 | -0,71 | -1,64 | 0,07288 | -0,79 | -1,73 | 0,00687 | NM_018366       | BARHL1       |  |
| 8158912 | -0,71 | -1,64 | 0,14229 | -1,97 | -3,91 | 0,00697 | NM_020064       | IQCJ         |  |
| 8083673 | -0,71 | -1,64 | 0,01007 | -1,67 | -3,18 | 0,00584 | NM_001042706    | RECQL4       |  |
| 8153838 | -0,71 | -1,64 | 0,02243 | -0,59 | -1,50 | 0,30637 | NM_004260       | ---          |  |
| 8128954 | -0,71 | -1,64 | 0,01371 | -0,79 | -1,73 | 0,00147 | ---             | DACH2        |  |
| 8168604 | -0,71 | -1,64 | 0,09910 | -1,20 | -2,30 | 0,02320 | NM_053281       | FLJ37396     |  |
| 8121405 | -0,71 | -1,64 | 0,13548 | 0,97  | 1,95  | 0,13893 | AK094715        | HIP1R        |  |
| 7959500 | -0,71 | -1,64 | 0,00033 | 0,71  | 1,64  | 0,07676 | NM_003959       | ZNF645       |  |
| 8166433 | -0,71 | -1,64 | 0,02499 | -0,77 | -1,70 | 0,09939 | NM_152577       | LOC400986    |  |
| 8053797 | -0,71 | -1,64 | 0,25591 | 1,24  | 2,37  | 0,04296 | ENST00000456556 | GLP1R        |  |
| 8119338 | -0,71 | -1,64 | 0,02265 | -0,49 | -1,41 | 0,19261 | NM_002062       | CYP2C19      |  |
| 7929478 | -0,71 | -1,64 | 0,01170 | -0,93 | -1,90 | 0,01283 | NM_000769       | ---          |  |
| 8165255 | -0,71 | -1,64 | 0,37968 | -1,36 | -2,57 | 0,00282 | ---             | LOC100049716 |  |
| 7952950 | -0,71 | -1,64 | 0,22104 | 1,80  | 3,48  | 0,00445 | ENST00000318291 | C6orf155     |  |
| 8127502 | -0,71 | -1,64 | 0,08206 | -0,41 | -1,33 | 0,41001 | NR_026807       | TYSND1       |  |
| 7934114 | -0,71 | -1,64 | 0,03477 | -0,06 | -1,04 | 0,81392 | NM_173555       | FSIP2        |  |
| 8046836 | -0,71 | -1,64 | 0,02028 | -0,93 | -1,91 | 0,01068 | BX648733        | MSMB         |  |
| 7927529 | -0,71 | -1,64 | 0,01872 | -0,79 | -1,72 | 0,00210 | NM_002443       | ---          |  |
| 8110629 | -0,71 | -1,64 | 0,04076 | -0,98 | -1,97 | 0,01449 | ---             | PYHIN1       |  |
| 7906386 | -0,71 | -1,64 | 0,00716 | -1,51 | -2,84 | 0,00774 | NM_152501       | ALLC         |  |
| 8040053 | -0,71 | -1,64 | 0,04057 | -1,18 | -2,27 | 0,00155 | NM_018436       | IGLV6-57     |  |
| 8071642 | -0,71 | -1,64 | 0,30822 | -1,11 | -2,15 | 0,00003 | ENST00000390285 | GAF3         |  |
| 8099807 | -0,71 | -1,64 | 0,07341 | -0,96 | -1,95 | 0,01575 | AF220235        | ACTBL2       |  |
| 8112198 | -0,71 | -1,64 | 0,20973 | -0,50 | -1,42 | 0,07970 | NM_001017992    | GAGE12G      |  |
| 8167577 | -0,71 | -1,64 | 0,54556 | -1,89 | -3,70 | 0,01873 | NM_001098409    | GAGE12G      |  |
| 8167584 | -0,71 | -1,64 | 0,54556 | -1,89 | -3,70 | 0,01873 | NM_001098409    | ---          |  |
| 7935114 | -0,71 | -1,64 | 0,13090 | -1,18 | -2,26 | 0,01416 | ---             | C13orf30     |  |
| 7968866 | -0,71 | -1,64 | 0,19338 | -1,46 | -2,74 | 0,00010 | NM_182508       | TAS2R39      |  |
| 8136844 | -0,71 | -1,64 | 0,24155 | -1,12 | -2,18 | 0,00178 | NM_176881       | LOC339524    |  |
| 7902808 | -0,71 | -1,64 | 0,02340 | -0,51 | -1,42 | 0,02067 | NR_026989       | ASZ1         |  |
| 8142480 | -0,71 | -1,64 | 0,05314 | -0,63 | -1,55 | 0,02562 | NR_023315       | TP53I3       |  |
| 8050702 | -0,71 | -1,64 | 0,07241 | 0,16  | 1,12  | 0,60475 | NM_004881       | C2orf51      |  |
| 8043407 | -0,71 | -1,64 | 0,07693 | -1,31 | -2,47 | 0,00533 | NM_152670       | CHIA         |  |
| 7903945 | -0,72 | -1,64 | 0,04400 | -0,88 | -1,84 | 0,01808 | NM_201653       | RDH12        |  |
| 7975284 | -0,72 | -1,64 | 0,21702 | -1,38 | -2,60 | 0,00044 | NM_152443       | APBA1        |  |
| 8161618 | -0,72 | -1,64 | 0,08536 | -0,21 | -1,16 | 0,41111 | NM_001163       | CCDC137      |  |
| 8010629 | -0,72 | -1,64 | 0,20201 | -0,56 | -1,48 | 0,24018 | NM_199287       | CENPW        |  |
| 8121911 | -0,72 | -1,64 | 0,28353 | -0,49 | -1,41 | 0,08821 | NM_001012507    | KDR          |  |
| 8100393 | -0,72 | -1,64 | 0,02515 | -0,66 | -1,58 | 0,04281 | NM_002253       | C5orf39      |  |
| 8111925 | -0,72 | -1,64 | 0,07009 | -1,08 | -2,11 | 0,01027 | NM_001014279    | OR5T1        |  |
| 7939975 | -0,72 | -1,64 | 0,11283 | -0,69 | -1,62 | 0,00241 | NM_001004745    | SLC39A4      |  |
| 8153762 | -0,72 | -1,64 | 0,09366 | -1,02 | -2,02 | 0,00556 | NM_017767       | CNTFR        |  |
| 8160823 | -0,72 | -1,64 | 0,27234 | -1,22 | -2,33 | 0,00036 | NM_147164       | ---          |  |
| 7988091 | -0,72 | -1,64 | 0,15369 | -1,42 | -2,67 | 0,00036 | ---             | YDJC         |  |
| 8074773 | -0,72 | -1,64 | 0,10337 | 0,25  | 1,19  | 0,74110 | NM_001017964    | C6orf165     |  |
| 8121015 | -0,72 | -1,64 | 0,21593 | -0,68 | -1,60 | 0,00773 | NM_001031743    | ---          |  |
| 7944832 | -0,72 | -1,64 | 0,01576 | -1,56 | -2,94 | 0,00548 | ---             | PWWP2A       |  |
| 8115580 | -0,72 | -1,64 | 0,01688 | -0,12 | -1,08 | 0,85802 | NM_052927       | EFHB         |  |
| 8085732 | -0,72 | -1,64 | 0,00173 | -0,42 | -1,34 | 0,01961 | NM_144715       | ATP8B5P      |  |
| 8155026 | -0,72 | -1,64 | 0,02259 | -0,65 | -1,57 | 0,02762 | NR_003581       | GBP7         |  |
| 7917548 | -0,72 | -1,64 | 0,09574 | -0,77 | -1,71 | 0,00520 | NM_207398       | CGN          |  |
| 7905406 | -0,72 | -1,64 | 0,08960 | 0,34  | 1,27  | 0,46453 | NM_020770       | SUSD4        |  |
| 7924508 | -0,72 | -1,64 | 0,05966 | -0,51 | -1,43 | 0,10711 | NM_017982       | OCEL1        |  |
| 8026687 | -0,72 | -1,64 | 0,14629 | 0,64  | 1,56  | 0,20716 | NM_024578       | ---          |  |
| 8170286 | -0,72 | -1,64 | 0,04849 | -0,95 | -1,93 | 0,09314 | ---             | OR2T10       |  |
| 7925751 | -0,72 | -1,64 | 0,04984 | -1,04 | -2,05 | 0,00061 | NM_001004693    | FCGR1B       |  |
| 7919133 | -0,72 | -1,64 | 0,02518 | -1,36 | -2,56 | 0,00186 | NM_001017986    | ---          |  |
| 8117628 | -0,72 | -1,64 | 0,17903 | -0,92 | -1,89 | 0,03586 | ---             | WNK4         |  |
| 8007363 | -0,72 | -1,64 | 0,03471 | -1,20 | -2,30 | 0,18375 | NM_032387       | STATH        |  |
| 8095422 | -0,72 | -1,64 | 0,00267 | -0,88 | -1,85 | 0,02166 | NM_003154       | RP11-408E5.4 |  |
| 7967876 | -0,72 | -1,64 | 0,17635 | -1,66 | -3,15 | 0,00424 | ENST00000382988 | ---          |  |
| 8103409 | -0,72 | -1,64 | 0,00757 | -1,21 | -2,32 | 0,05448 | ---             | TAS2R31      |  |
| 7961291 | -0,72 | -1,64 | 0,11503 | -0,83 | -1,78 | 0,01927 | NM_176885       | HDAC11       |  |
| 8077958 | -0,72 | -1,64 | 0,03231 | 0,74  | 1,67  | 0,07437 | NM_024827       | ZNF443       |  |
| 8034393 | -0,72 | -1,64 | 0,17408 | -1,27 | -2,41 | 0,01060 | NM_005815       | ---          |  |
| 8089986 | -0,72 | -1,64 | 0,03403 | -1,07 | -2,10 | 0,01229 | ---             | ---          |  |
| 8080509 | -0,72 | -1,64 | 0,05034 | -2,09 | -4,27 | 0,00422 | ---             | SCRT1        |  |
| 8153937 | -0,72 | -1,64 | 0,15969 | -1,15 | -2,22 | 0,01374 | NM_031309       | PRAMEF3      |  |
| 7912585 | -0,72 | -1,64 | 0,12318 | -2,06 | -4,17 | 0,00078 | NM_001013692    | GABRG2       |  |
| 8109677 | -0,72 | -1,64 | 0,15204 | -1,22 | -2,33 | 0,02208 | NM_198904       | WNT8B        |  |
| 7929822 | -0,72 | -1,64 | 0,01827 | -1,29 | -2,45 | 0,02107 | NM_003393       | ---          |  |
| 8169441 | -0,72 | -1,64 | 0,11152 | -0,54 | -1,45 | 0,04795 | ---             | ---          |  |

|         |       |       |         |       |       |         |                 |          |              |
|---------|-------|-------|---------|-------|-------|---------|-----------------|----------|--------------|
| 7931152 | -0,72 | -1,64 | 0,06313 | -1,52 | -2,87 | 0,03510 | ---             | OR2J3    |              |
| 8117718 | -0,72 | -1,64 | 0,51951 | -1,40 | -2,64 | 0,06512 | NM_001005216    |          | DEFB119      |
| 8065555 | -0,72 | -1,64 | 0,14381 | -1,46 | -2,76 | 0,02549 | NM_173460       |          | ST8SIA3      |
| 8021349 | -0,72 | -1,64 | 0,04053 | -0,92 | -1,89 | 0,11376 | NM_015879       |          | ---          |
| 8008817 | -0,72 | -1,64 | 0,21580 | -1,70 | -3,26 | 0,05024 | ---             | TEKT4    |              |
| 8053753 | -0,72 | -1,65 | 0,35580 | -0,55 | -1,47 | 0,33205 | NM_144705       |          | ---          |
| 8020760 | -0,72 | -1,65 | 0,23302 | -1,10 | -2,14 | 0,06592 | ---             | OR8J1    |              |
| 7939981 | -0,72 | -1,65 | 0,09248 | -1,37 | -2,58 | 0,00015 | NM_001005205    |          | MTNR1A       |
| 8104074 | -0,72 | -1,65 | 0,08592 | -0,17 | -1,12 | 0,32610 | NM_005958       |          | MYH4         |
| 8012696 | -0,72 | -1,65 | 0,01307 | -0,89 | -1,86 | 0,00609 | NM_017533       |          | SYT10        |
| 7962226 | -0,72 | -1,65 | 0,09063 | -1,29 | -2,45 | 0,00374 | NM_198992       |          | LHX4         |
| 7907849 | -0,72 | -1,65 | 0,10008 | -1,11 | -2,17 | 0,01847 | NM_033343       |          | NOBOX        |
| 8143635 | -0,72 | -1,65 | 0,07652 | -1,44 | -2,72 | 0,04312 | NM_001080413    |          | ---          |
| 8136078 | -0,72 | -1,65 | 0,42899 | -0,60 | -1,51 | 0,44468 | ---             | COL28A1  |              |
| 8138157 | -0,72 | -1,65 | 0,11417 | -0,52 | -1,44 | 0,20309 | NM_001037763    |          | ---          |
| 8105605 | -0,72 | -1,65 | 0,14096 | -0,80 | -1,74 | 0,00126 | ---             | DSG3     |              |
| 8020762 | -0,72 | -1,65 | 0,18899 | -0,60 | -1,52 | 0,01036 | NM_001944       |          | ---          |
| 8130011 | -0,72 | -1,65 | 0,15511 | -0,86 | -1,81 | 0,00053 | ---             | ARHGAP36 |              |
| 8169931 | -0,72 | -1,65 | 0,07253 | -1,89 | -3,70 | 0,00087 | NM_144967       |          | LOC100130857 |
| 7982339 | -0,72 | -1,65 | 0,15671 | -1,19 | -2,27 | 0,00408 | AK097050        | FAM176A  |              |
| 8053278 | -0,72 | -1,65 | 0,00818 | -1,58 | -2,98 | 0,00221 | NM_001135032    |          | HOXA13       |
| 8138770 | -0,72 | -1,65 | 0,03535 | -1,53 | -2,89 | 0,00061 | NM_000522       |          | XAGE2        |
| 8167693 | -0,72 | -1,65 | 0,14742 | -0,86 | -1,81 | 0,00474 | NM_130777       |          | XAGE2        |
| 8172749 | -0,72 | -1,65 | 0,14742 | -0,86 | -1,81 | 0,00474 | NM_130777       |          | ---          |
| 7904693 | -0,72 | -1,65 | 0,27392 | -0,72 | -1,64 | 0,13070 | ---             | MIR32    |              |
| 8163107 | -0,72 | -1,65 | 0,01118 | -0,44 | -1,35 | 0,20483 | NR_029506       |          | TMEM20       |
| 7929383 | -0,72 | -1,65 | 0,21100 | 1,45  | 2,74  | 0,00232 | NM_001134658    |          | ---          |
| 7956747 | -0,72 | -1,65 | 0,33313 | -0,87 | -1,82 | 0,06518 | ---             | INTS5    |              |
| 7948772 | -0,72 | -1,65 | 0,09648 | -0,39 | -1,31 | 0,27135 | NM_030628       |          | ---          |
| 8050472 | -0,72 | -1,65 | 0,07335 | -0,68 | -1,61 | 0,01405 | ---             | MGC15705 |              |
| 8072484 | -0,72 | -1,65 | 0,09466 | -0,87 | -1,83 | 0,03344 | ENST00000425084 |          | ---          |
| 8100754 | -0,72 | -1,65 | 0,14248 | -1,36 | -2,58 | 0,00060 | ---             | ADAMTS20 |              |
| 7962384 | -0,72 | -1,65 | 0,03844 | -1,24 | -2,36 | 0,00046 | NM_025003       |          | UBL4A        |
| 8176098 | -0,72 | -1,65 | 0,03458 | 0,51  | 1,42  | 0,21705 | NM_014235       |          | NFKBIL1      |
| 8118127 | -0,72 | -1,65 | 0,05673 | -0,27 | -1,20 | 0,42623 | NM_005007       |          | NFKBIL1      |
| 8177967 | -0,72 | -1,65 | 0,05673 | -0,27 | -1,20 | 0,42623 | NM_005007       |          | NFKBIL1      |
| 8179249 | -0,72 | -1,65 | 0,05673 | -0,27 | -1,20 | 0,42623 | NM_005007       |          | ---          |
| 8108399 | -0,72 | -1,65 | 0,02149 | -1,58 | -2,99 | 0,00095 | ---             | ---      |              |
| 8083467 | -0,72 | -1,65 | 0,08320 | -0,72 | -1,65 | 0,00316 | ---             | CPNE6    |              |
| 7973510 | -0,72 | -1,65 | 0,35758 | -1,79 | -3,46 | 0,00250 | NM_006032       |          | ---          |
| 7907968 | -0,72 | -1,65 | 0,06789 | -0,52 | -1,43 | 0,00070 | ---             | TTY11    |              |
| 8177085 | -0,72 | -1,65 | 0,20631 | -0,90 | -1,87 | 0,01023 | NR_001548       |          | ---          |
| 7911349 | -0,72 | -1,65 | 0,11065 | -0,72 | -1,64 | 0,00777 | ---             | CDY1     |              |
| 8176926 | -0,72 | -1,65 | 0,13843 | -1,39 | -2,62 | 0,01062 | NM_170723       |          | CDY1         |
| 8177405 | -0,72 | -1,65 | 0,13843 | -1,39 | -2,62 | 0,01062 | NM_170723       |          | TNFRSF13C    |
| 8076387 | -0,72 | -1,65 | 0,04031 | -1,17 | -2,25 | 0,00200 | NM_052945       |          | ELFN2        |
| 8075921 | -0,72 | -1,65 | 0,00954 | -0,63 | -1,55 | 0,04842 | NM_052906       |          | NRCAM        |
| 8142270 | -0,72 | -1,65 | 0,04103 | -0,88 | -1,84 | 0,00093 | NM_001037132    |          | PPIEL        |
| 7915204 | -0,72 | -1,65 | 0,10302 | -1,37 | -2,58 | 0,00244 | AK093659        | PCDHB12  |              |
| 8108733 | -0,72 | -1,65 | 0,16678 | -1,45 | -2,73 | 0,02838 | NM_018932       |          | MVK          |
| 7958565 | -0,72 | -1,65 | 0,09179 | -0,32 | -1,24 | 0,40390 | NM_000431       |          | BPI          |
| 8062444 | -0,72 | -1,65 | 0,00178 | -1,26 | -2,40 | 0,00274 | NM_001725       |          | TLR9         |
| 8087852 | -0,72 | -1,65 | 0,09137 | -1,29 | -2,44 | 0,07727 | NM_017442       |          | DPF3         |
| 7979963 | -0,72 | -1,65 | 0,05817 | -1,61 | -3,05 | 0,02168 | NM_012074       |          | FGD5         |
| 8078066 | -0,72 | -1,65 | 0,07156 | -1,49 | -2,81 | 0,00720 | NM_152536       |          | RRP9         |
| 8087790 | -0,72 | -1,65 | 0,14938 | 0,75  | 1,68  | 0,05191 | NM_004704       |          | SLC24A1      |
| 7984276 | -0,72 | -1,65 | 0,12979 | 0,94  | 1,92  | 0,09269 | NM_004727       |          | ---          |
| 8129037 | -0,72 | -1,65 | 0,00424 | -0,65 | -1,57 | 0,10269 | ---             | ---      |              |
| 8091560 | -0,72 | -1,65 | 0,19270 | -0,61 | -1,53 | 0,00016 | ---             | OR8D2    |              |
| 7952394 | -0,72 | -1,65 | 0,14844 | -0,99 | -1,99 | 0,00165 | NM_001002918    |          | PRSS37       |
| 8143463 | -0,72 | -1,65 | 0,00082 | -1,02 | -2,02 | 0,03129 | NM_001008270    |          | THSD1        |
| 7971813 | -0,72 | -1,65 | 0,03467 | -0,75 | -1,68 | 0,00777 | NM_018676       |          | C1orf86      |
| 7911683 | -0,72 | -1,65 | 0,08164 | -1,07 | -2,09 | 0,04465 | NM_182533       |          | PHLDB2       |
| 8089472 | -0,72 | -1,65 | 0,13904 | -0,73 | -1,66 | 0,00303 | NM_001134438    |          | UNC13A       |
| 8035318 | -0,72 | -1,65 | 0,04563 | -1,25 | -2,38 | 0,00069 | NM_001080421    |          | KIAA0748     |
| 7963851 | -0,72 | -1,65 | 0,02875 | -0,47 | -1,38 | 0,02303 | NM_001098815    |          | TRIM7        |
| 8116504 | -0,72 | -1,65 | 0,14614 | -0,13 | -1,09 | 0,76864 | NM_203293       |          | FAM123C      |
| 8045224 | -0,72 | -1,65 | 0,10880 | -0,94 | -1,92 | 0,03108 | NM_152698       |          | ---          |
| 8027341 | -0,72 | -1,65 | 0,19691 | -0,98 | -1,97 | 0,00052 | ---             | RASD2    |              |
| 8072705 | -0,72 | -1,65 | 0,20060 | 0,47  | 1,38  | 0,09163 | NM_014310       |          | TAGLN3       |
| 8081620 | -0,72 | -1,65 | 0,11167 | -0,70 | -1,63 | 0,17045 | NM_013259       |          | SDR9C7       |
| 7964285 | -0,72 | -1,65 | 0,17191 | -1,46 | -2,76 | 0,00356 | NM_148897       |          | HYDIN        |
| 8002446 | -0,72 | -1,65 | 0,13440 | -1,35 | -2,56 | 0,00227 | NM_032821       |          | ---          |

|         |       |       |         |       |       |         |                 |           |  |
|---------|-------|-------|---------|-------|-------|---------|-----------------|-----------|--|
| 7944300 | -0,72 | -1,65 | 0,05412 | -0,88 | -1,84 | 0,07957 | ---             | ---       |  |
| 8048887 | -0,72 | -1,65 | 0,01304 | -0,72 | -1,65 | 0,09228 | ---             | LYPLA2    |  |
| 7898902 | -0,72 | -1,65 | 0,13556 | -0,41 | -1,33 | 0,41510 | NM_007260       | DENND2C   |  |
| 7918755 | -0,72 | -1,65 | 0,09544 | -1,06 | -2,08 | 0,01526 | BC063894        | TBC1D3B   |  |
| 8014376 | -0,72 | -1,65 | 0,32399 | 1,23  | 2,35  | 0,07475 | NM_001001417    | TMEM155   |  |
| 8102636 | -0,72 | -1,65 | 0,03105 | -1,00 | -2,01 | 0,04091 | NM_152399       | ---       |  |
| 7996759 | -0,72 | -1,65 | 0,04495 | -0,61 | -1,53 | 0,05063 | ---             | VASH1     |  |
| 7975889 | -0,72 | -1,65 | 0,07024 | -0,05 | -1,04 | 0,80186 | NM_014909       | CKKAR     |  |
| 8099746 | -0,72 | -1,65 | 0,03082 | -1,49 | -2,81 | 0,04487 | NM_000730       | ABCC11    |  |
| 8001271 | -0,72 | -1,65 | 0,14661 | -0,59 | -1,51 | 0,18873 | NM_033151       | C19orf22  |  |
| 8032127 | -0,72 | -1,65 | 0,05950 | 1,19  | 2,28  | 0,13371 | NM_138774       | ---       |  |
| 8081429 | -0,72 | -1,65 | 0,25220 | -0,53 | -1,44 | 0,06258 | ---             | EPHB3     |  |
| 8084524 | -0,72 | -1,65 | 0,02603 | 0,09  | 1,06  | 0,84292 | NM_004443       | SH2D3A    |  |
| 8033319 | -0,72 | -1,65 | 0,02501 | 0,07  | 1,05  | 0,91457 | NM_005490       | SLC30A10  |  |
| 7924342 | -0,72 | -1,65 | 0,10434 | -0,61 | -1,52 | 0,17193 | NM_018713       | EFCAB2    |  |
| 7911112 | -0,72 | -1,65 | 0,24265 | -0,93 | -1,91 | 0,00019 | NR_026586       | SNORA21   |  |
| 8014755 | -0,72 | -1,65 | 0,00624 | 0,39  | 1,31  | 0,05969 | NR_002576       | CAMKK1    |  |
| 8011480 | -0,72 | -1,65 | 0,04183 | -0,48 | -1,39 | 0,27282 | NM_032294       | IER3IP1   |  |
| 8021147 | -0,72 | -1,65 | 0,12955 | -0,47 | -1,38 | 0,24328 | NM_016097       | BCMO1     |  |
| 7997401 | -0,72 | -1,65 | 0,02724 | -0,76 | -1,70 | 0,01248 | NM_017429       | PRSS53    |  |
| 8000978 | -0,72 | -1,65 | 0,03642 | -1,14 | -2,20 | 0,00219 | NM_001039503    | OR4K13    |  |
| 7977478 | -0,72 | -1,65 | 0,17890 | -1,46 | -2,75 | 0,04446 | NM_001004714    | OVCH1     |  |
| 7962029 | -0,72 | -1,65 | 0,10602 | -1,04 | -2,06 | 0,15813 | NM_183378       | ---       |  |
| 8047465 | -0,72 | -1,65 | 0,03758 | -0,71 | -1,63 | 0,05425 | ---             | FAM123A   |  |
| 7970648 | -0,72 | -1,65 | 0,25951 | -1,21 | -2,31 | 0,00505 | NM_152704       | FSD2      |  |
| 7991019 | -0,72 | -1,65 | 0,14262 | -1,16 | -2,23 | 0,00537 | NM_001007122    | FAM113B   |  |
| 7955045 | -0,72 | -1,65 | 0,05055 | 0,32  | 1,25  | 0,33749 | BC008360        | TLR10     |  |
| 8099826 | -0,72 | -1,65 | 0,05751 | -1,10 | -2,15 | 0,01696 | NM_030956       | ---       |  |
| 7990377 | -0,72 | -1,65 | 0,04259 | -0,55 | -1,46 | 0,00081 | ---             | ---       |  |
| 8122858 | -0,72 | -1,65 | 0,00752 | -1,68 | -3,21 | 0,00637 | ---             | ANKRD62   |  |
| 8074201 | -0,73 | -1,65 | 0,08651 | -0,47 | -1,39 | 0,00009 | ENST00000418274 | RPRM      |  |
| 8055941 | -0,73 | -1,65 | 0,07417 | -1,14 | -2,21 | 0,09254 | NM_019845       | FLJ33360  |  |
| 8110882 | -0,73 | -1,65 | 0,04498 | -0,94 | -1,92 | 0,00823 | NR_028351       | OR1D4     |  |
| 8003806 | -0,73 | -1,65 | 0,68371 | -2,70 | -6,52 | 0,01852 | NM_003552       | SYT16     |  |
| 7974882 | -0,73 | -1,65 | 0,24298 | -1,40 | -2,64 | 0,01158 | NM_031914       | BICD2     |  |
| 8162438 | -0,73 | -1,65 | 0,06918 | 1,46  | 2,75  | 0,02041 | NM_001003800    | ATG4B     |  |
| 8049888 | -0,73 | -1,65 | 0,12623 | 1,27  | 2,42  | 0,06511 | NM_013325       | OR52N4    |  |
| 7938053 | -0,73 | -1,65 | 0,18660 | -0,60 | -1,52 | 0,07416 | NM_001005175    | C19orf34  |  |
| 8032375 | -0,73 | -1,65 | 0,07378 | -0,67 | -1,59 | 0,10165 | NR_033400       | ---       |  |
| 8168553 | -0,73 | -1,65 | 0,04318 | -0,46 | -1,38 | 0,12162 | ---             | ---       |  |
| 7979042 | -0,73 | -1,65 | 0,02031 | -2,28 | -4,86 | 0,02192 | ---             | KRTAP12-2 |  |
| 8070791 | -0,73 | -1,65 | 0,23465 | -1,62 | -3,07 | 0,00050 | NM_181684       | ---       |  |
| 7931928 | -0,73 | -1,65 | 0,01344 | -0,89 | -1,86 | 0,00214 | ---             | ---       |  |
| 8116662 | -0,73 | -1,65 | 0,02731 | -0,48 | -1,40 | 0,28610 | ---             | DNAH12    |  |
| 8088315 | -0,73 | -1,65 | 0,06422 | -0,53 | -1,44 | 0,01219 | NM_178504       | POLD4     |  |
| 7949746 | -0,73 | -1,65 | 0,10121 | 1,50  | 2,83  | 0,01294 | NM_021173       | ---       |  |
| 8156024 | -0,73 | -1,65 | 0,11784 | -1,23 | -2,35 | 0,00698 | ---             | MAL2      |  |
| 8148040 | -0,73 | -1,65 | 0,17520 | 4,97  | 31,36 | 0,00276 | NM_052886       | ---       |  |
| 8029615 | -0,73 | -1,65 | 0,16884 | -0,90 | -1,86 | 0,01086 | ---             | DMC1      |  |
| 8076094 | -0,73 | -1,65 | 0,14399 | -0,87 | -1,83 | 0,00096 | NM_007068       | ---       |  |
| 8069768 | -0,73 | -1,65 | 0,06919 | -2,09 | -4,25 | 0,00507 | ---             | LRRCS3    |  |
| 7917015 | -0,73 | -1,65 | 0,09550 | -0,70 | -1,63 | 0,02694 | ENST00000416014 | TRAIIP    |  |
| 8087513 | -0,73 | -1,65 | 0,06472 | 0,42  | 1,34  | 0,01413 | NM_005879       | ---       |  |
| 7904715 | -0,73 | -1,65 | 0,08711 | -2,67 | -6,38 | 0,00041 | ---             | GJB7      |  |
| 8128007 | -0,73 | -1,65 | 0,08483 | 1,78  | 3,43  | 0,01035 | NM_198568       | DLX6      |  |
| 8134407 | -0,73 | -1,65 | 0,28950 | -0,79 | -1,73 | 0,03673 | NM_005222       | SYNPR     |  |
| 8080855 | -0,73 | -1,65 | 0,01444 | -0,60 | -1,52 | 0,00246 | NM_144642       | ---       |  |
| 8095297 | -0,73 | -1,65 | 0,01067 | -1,40 | -2,65 | 0,01033 | ---             | ---       |  |
| 7948367 | -0,73 | -1,65 | 0,16375 | -0,41 | -1,32 | 0,09060 | ---             | MN1       |  |
| 8075126 | -0,73 | -1,65 | 0,04742 | 0,02  | 1,01  | 0,94007 | NM_002430       | GPR88     |  |
| 7903355 | -0,73 | -1,65 | 0,47575 | -2,31 | -4,95 | 0,00086 | NM_022049       | FDX1L     |  |
| 8033960 | -0,73 | -1,65 | 0,01283 | 0,67  | 1,59  | 0,11732 | NM_001031734    | JAG2      |  |
| 7981538 | -0,73 | -1,65 | 0,02803 | 1,62  | 3,06  | 0,11786 | NM_002226       | PNMA1     |  |
| 7980044 | -0,73 | -1,66 | 0,03245 | 1,37  | 2,59  | 0,07557 | NM_006029       | ---       |  |
| 8051394 | -0,73 | -1,66 | 0,10437 | -1,26 | -2,39 | 0,00145 | ---             | ---       |  |
| 8081113 | -0,73 | -1,66 | 0,15888 | -1,03 | -2,05 | 0,01410 | ---             | GPR44     |  |
| 7948470 | -0,73 | -1,66 | 0,35922 | -1,69 | -3,23 | 0,00595 | NM_004778       | ---       |  |
| 8083320 | -0,73 | -1,66 | 0,13661 | -0,28 | -1,22 | 0,03017 | ---             | ---       |  |
| 7932306 | -0,73 | -1,66 | 0,33461 | -1,40 | -2,64 | 0,01564 | ---             | ---       |  |
| 8076513 | -0,73 | -1,66 | 0,07991 | -1,72 | -3,30 | 0,00217 | ---             | ---       |  |
| 8117161 | -0,73 | -1,66 | 0,02184 | -1,20 | -2,29 | 0,00207 | ---             | HRAS      |  |
| 7945436 | -0,73 | -1,66 | 0,04124 | -0,77 | -1,71 | 0,11797 | NM_176795       | CT45A2    |  |
| 8170060 | -0,73 | -1,66 | 0,23024 | -1,65 | -3,14 | 0,00412 | NM_152582       | ---       |  |

|         |       |       |         |       |       |         |                 |           |              |
|---------|-------|-------|---------|-------|-------|---------|-----------------|-----------|--------------|
| 8094257 | -0,73 | -1,66 | 0,14186 | -0,96 | -1,95 | 0,02938 | ---             | SPEM1     |              |
| 8004394 | -0,73 | -1,66 | 0,04869 | -0,61 | -1,52 | 0,06867 | NM_199339       |           | GLIPR1L2     |
| 7957253 | -0,73 | -1,66 | 0,01255 | 0,04  | 1,03  | 0,83147 | NM_152436       |           | SKCG-1       |
| 7943707 | -0,73 | -1,66 | 0,08563 | -0,67 | -1,59 | 0,04672 | AY662656        | ITGAL     |              |
| 7994826 | -0,73 | -1,66 | 0,03961 | -1,28 | -2,43 | 0,00006 | NM_002209       | ---       |              |
| 8061165 | -0,73 | -1,66 | 0,19909 | -1,74 | -3,34 | 0,02864 | ---             | ---       |              |
| 7962238 | -0,73 | -1,66 | 0,33970 | -2,07 | -4,21 | 0,00456 | ---             | MAGIX     |              |
| 8167443 | -0,73 | -1,66 | 0,06644 | -0,96 | -1,95 | 0,07318 | NM_024859       |           | C6orf105     |
| 8123951 | -0,73 | -1,66 | 0,00337 | -0,33 | -1,26 | 0,16424 | NM_001143948    |           | SLC5A5       |
| 8026877 | -0,73 | -1,66 | 0,02098 | -0,77 | -1,70 | 0,01230 | NM_000453       |           | LOC554249    |
| 8155393 | -0,73 | -1,66 | 0,07474 | 0,40  | 1,32  | 0,06076 | AK292642        | LOC554249 |              |
| 8161451 | -0,73 | -1,66 | 0,07474 | 0,40  | 1,32  | 0,06076 | AK292642        | TNFRSF17  |              |
| 7993267 | -0,73 | -1,66 | 0,00895 | -1,35 | -2,54 | 0,04627 | NM_001192       |           | C6orf59      |
| 8130641 | -0,73 | -1,66 | 0,09851 | -1,07 | -2,10 | 0,00372 | NR_024277       | ---       |              |
| 8084215 | -0,73 | -1,66 | 0,20352 | -1,15 | -2,22 | 0,10760 | ---             | CD8B      |              |
| 8053594 | -0,73 | -1,66 | 0,06344 | -1,30 | -2,47 | 0,02199 | NM_172101       |           | C2orf68      |
| 8053458 | -0,73 | -1,66 | 0,15907 | -1,15 | -2,21 | 0,02171 | NM_001013649    |           | H2AFX        |
| 7952179 | -0,73 | -1,66 | 0,31882 | 0,51  | 1,43  | 0,17859 | NM_002105       |           | FLJ16734     |
| 8137483 | -0,73 | -1,66 | 0,15062 | -1,74 | -3,35 | 0,00551 | AK131514        | ATP12A    |              |
| 7968062 | -0,73 | -1,66 | 0,08689 | -0,18 | -1,13 | 0,24550 | NM_001676       |           | DUOXA2       |
| 7983405 | -0,73 | -1,66 | 0,00588 | -0,63 | -1,54 | 0,05844 | NM_207581       |           | ANO9         |
| 7945394 | -0,73 | -1,66 | 0,04308 | 1,67  | 3,18  | 0,08491 | NM_001012302    |           | WDFY4        |
| 7927425 | -0,73 | -1,66 | 0,06256 | -1,14 | -2,20 | 0,00010 | NM_020945       | ---       |              |
| 7971669 | -0,73 | -1,66 | 0,04578 | -1,06 | -2,08 | 0,00010 | ---             | ANKRD58   |              |
| 8169657 | -0,73 | -1,66 | 0,21171 | -1,80 | -3,47 | 0,01617 | NM_001105576    |           | DUSP28       |
| 8049684 | -0,73 | -1,66 | 0,04355 | 0,21  | 1,16  | 0,48945 | NM_001033575    |           | MYO15B       |
| 8009913 | -0,73 | -1,66 | 0,11245 | -0,42 | -1,33 | 0,10637 | NR_003587       | ---       |              |
| 8068044 | -0,73 | -1,66 | 0,12989 | -1,11 | -2,16 | 0,00302 | ---             | PRSS29P   |              |
| 7998444 | -0,73 | -1,66 | 0,17550 | -1,36 | -2,57 | 0,00034 | ENST00000440800 | ---       |              |
| 7955168 | -0,73 | -1,66 | 0,09069 | -1,32 | -2,50 | 0,01401 | ---             | CHMP6     |              |
| 8010550 | -0,73 | -1,66 | 0,03906 | 0,56  | 1,47  | 0,20188 | NM_024591       |           | MIR181B1     |
| 7923173 | -0,73 | -1,66 | 0,05810 | -0,54 | -1,45 | 0,03603 | NR_029612       |           | OR8B3        |
| 7952400 | -0,73 | -1,66 | 0,01203 | -1,28 | -2,42 | 0,00499 | NM_001005467    |           | LRRIQ3       |
| 7917004 | -0,73 | -1,66 | 0,16148 | -1,09 | -2,13 | 0,01701 | NM_001105659    |           | HECW2        |
| 8057898 | -0,73 | -1,66 | 0,10039 | 0,10  | 1,07  | 0,64301 | NM_020760       |           | PMVK         |
| 7920567 | -0,73 | -1,66 | 0,08408 | -0,49 | -1,40 | 0,06840 | NM_006556       |           | TRAJ17       |
| 7973221 | -0,73 | -1,66 | 0,01910 | -1,15 | -2,21 | 0,00107 | AK301287        | ELAVL4    |              |
| 7901342 | -0,73 | -1,66 | 0,16059 | -1,04 | -2,06 | 0,00305 | NM_021952       |           | TIMD4        |
| 8115445 | -0,73 | -1,66 | 0,11931 | -0,67 | -1,59 | 0,01129 | NM_138379       |           | NRL          |
| 7978107 | -0,73 | -1,66 | 0,00898 | -1,32 | -2,49 | 0,00441 | NM_006177       |           | IL9          |
| 8114256 | -0,73 | -1,66 | 0,07701 | -0,91 | -1,88 | 0,01597 | NM_000590       |           | SLC1A2       |
| 7947496 | -0,73 | -1,66 | 0,22936 | -0,86 | -1,81 | 0,05487 | NM_004171       | ---       |              |
| 8087746 | -0,73 | -1,66 | 0,07620 | -0,22 | -1,17 | 0,57323 | ---             | ATP5D     |              |
| 8024219 | -0,73 | -1,66 | 0,05467 | 0,56  | 1,48  | 0,29065 | NM_001687       |           | GYS2         |
| 7961673 | -0,73 | -1,66 | 0,02138 | -0,85 | -1,80 | 0,00388 | NM_021957       |           | NHP2         |
| 8116168 | -0,73 | -1,66 | 0,29079 | 1,99  | 3,98  | 0,00442 | NM_017838       |           | MBD3L1       |
| 8025452 | -0,73 | -1,66 | 0,08757 | -0,88 | -1,84 | 0,08833 | NM_145208       |           | FMR1NB       |
| 8170353 | -0,73 | -1,66 | 0,12177 | -0,77 | -1,70 | 0,04553 | NM_152578       |           | HPCAL4       |
| 7915245 | -0,73 | -1,66 | 0,07853 | -0,38 | -1,30 | 0,09068 | NM_016257       | ---       |              |
| 7939070 | -0,73 | -1,66 | 0,02108 | -0,74 | -1,67 | 0,00269 | ---             | LOC146880 |              |
| 8017671 | -0,73 | -1,66 | 0,15415 | -0,01 | -1,00 | 0,99542 | NR_027487       |           | ZNF770       |
| 7982527 | -0,73 | -1,66 | 0,01220 | -0,37 | -1,30 | 0,26435 | NM_014106       |           | SORCS3       |
| 7930341 | -0,73 | -1,66 | 0,17669 | -0,62 | -1,53 | 0,01128 | NM_014978       |           | SIAH3        |
| 7971419 | -0,73 | -1,66 | 0,03461 | -1,64 | -3,12 | 0,06558 | NM_198849       |           | RXRG         |
| 7921955 | -0,73 | -1,66 | 0,24340 | -1,54 | -2,91 | 0,00250 | NM_006917       |           | ELN          |
| 8133372 | -0,73 | -1,66 | 0,05622 | -1,13 | -2,20 | 0,00469 | NM_000501       |           | AVPR1A       |
| 7964660 | -0,73 | -1,66 | 0,14421 | -1,33 | -2,51 | 0,00047 | NM_000706       | ---       |              |
| 7994350 | -0,73 | -1,66 | 0,22559 | -1,15 | -2,21 | 0,01941 | ---             | PNLIP     |              |
| 7930777 | -0,73 | -1,66 | 0,11917 | -0,70 | -1,62 | 0,00726 | NM_000936       |           | RUNDC2C      |
| 7993825 | -0,73 | -1,66 | 0,08299 | 0,03  | 1,02  | 0,83748 | NR_002939       | ---       |              |
| 7920045 | -0,73 | -1,66 | 0,02312 | -0,71 | -1,63 | 0,00197 | ---             | FAM115A   |              |
| 8143597 | -0,73 | -1,66 | 0,01719 | -1,47 | -2,77 | 0,02496 | ENST00000307248 |           | GCG          |
| 8056250 | -0,73 | -1,66 | 0,11627 | -0,89 | -1,86 | 0,01463 | NM_002054       |           | SERPINB5     |
| 8021584 | -0,73 | -1,66 | 0,01855 | 0,42  | 1,33  | 0,06751 | NM_002639       |           | LOC100133130 |
| 7933261 | -0,73 | -1,66 | 0,00679 | -0,73 | -1,66 | 0,02860 | ENST00000317346 |           | LOC100133130 |
| 7933572 | -0,73 | -1,66 | 0,00679 | -0,73 | -1,66 | 0,02860 | ENST00000317346 | ---       |              |
| 7927924 | -0,73 | -1,66 | 0,01080 | -0,90 | -1,87 | 0,00817 | ---             | GPR148    |              |
| 8045216 | -0,73 | -1,66 | 0,12660 | -1,34 | -2,53 | 0,01031 | NM_207364       | ---       |              |
| 7996569 | -0,73 | -1,66 | 0,19834 | 0,08  | 1,06  | 0,85287 | ---             | ANKRD24   |              |
| 8024768 | -0,73 | -1,66 | 0,19756 | -1,06 | -2,09 | 0,03587 | NM_133475       |           | DAPP1        |
| 8096602 | -0,73 | -1,66 | 0,04253 | 0,51  | 1,42  | 0,10348 | NM_014395       | ---       |              |
| 8061517 | -0,73 | -1,66 | 0,01473 | -1,44 | -2,72 | 0,00000 | ---             | TMEM75    |              |
| 8152815 | -0,73 | -1,66 | 0,20301 | -0,85 | -1,80 | 0,02933 | BC137383        | ---       |              |

|         |       |       |         |       |       |         |                 |             |
|---------|-------|-------|---------|-------|-------|---------|-----------------|-------------|
| 8045537 | -0,73 | -1,66 | 0,00029 | -1,11 | -2,17 | 0,01408 | ---             | ---         |
| 8173364 | -0,73 | -1,66 | 0,34763 | -0,85 | -1,80 | 0,08751 | ---             | SCAND1      |
| 8066031 | -0,73 | -1,66 | 0,06126 | -1,44 | -2,71 | 0,01778 | NM_016558       | OR2W3       |
| 7911229 | -0,73 | -1,66 | 0,09818 | -0,74 | -1,67 | 0,09351 | NM_001001957    | OR2W3       |
| 7911231 | -0,73 | -1,66 | 0,09818 | -0,74 | -1,67 | 0,09351 | NM_001001957    | PSD         |
| 7935990 | -0,73 | -1,66 | 0,03530 | -0,43 | -1,35 | 0,36491 | NM_0022779      | AFG3L1      |
| 7998083 | -0,73 | -1,66 | 0,15067 | -0,40 | -1,32 | 0,16498 | NR_003228       | ANKRD31     |
| 8112672 | -0,73 | -1,66 | 0,01583 | -0,35 | -1,27 | 0,18664 | NM_001164443    | JMJD5       |
| 7994269 | -0,73 | -1,66 | 0,23179 | -0,64 | -1,56 | 0,01748 | NM_024773       | SCNN1B      |
| 7994074 | -0,73 | -1,66 | 0,13797 | -1,15 | -2,21 | 0,00505 | NM_000336       | EPCAM       |
| 8041853 | -0,73 | -1,66 | 0,00064 | 5,74  | 53,51 | 0,00047 | NM_002354       | C17orf44    |
| 8012416 | -0,73 | -1,66 | 0,05734 | -0,77 | -1,71 | 0,01847 | NR_026951       | ---         |
| 8104441 | -0,73 | -1,66 | 0,07579 | -1,89 | -3,70 | 0,01113 | ---             | PSMB8       |
| 8125500 | -0,73 | -1,66 | 0,10548 | -0,14 | -1,10 | 0,79808 | NM_004159       | PSMB8       |
| 8178855 | -0,73 | -1,66 | 0,10548 | -0,14 | -1,10 | 0,79808 | NM_004159       | PSMB8       |
| 8180049 | -0,73 | -1,66 | 0,10548 | -0,14 | -1,10 | 0,79808 | NM_004159       | CCDC85A     |
| 8042079 | -0,73 | -1,66 | 0,01298 | -1,25 | -2,38 | 0,01934 | NM_001080433    | ZNHIT2      |
| 7949373 | -0,73 | -1,66 | 0,23475 | -1,34 | -2,53 | 0,17475 | NM_014205       | AMIGO3      |
| 8087453 | -0,73 | -1,66 | 0,14041 | -0,08 | -1,06 | 0,87580 | NM_198722       | VN1R3       |
| 8001064 | -0,73 | -1,66 | 0,10934 | -0,86 | -1,81 | 0,11390 | BC107074        | ---         |
| 7968000 | -0,73 | -1,66 | 0,00063 | -1,09 | -2,13 | 0,01681 | ---             | PEX26       |
| 8071136 | -0,73 | -1,66 | 0,03980 | 0,71  | 1,64  | 0,13914 | NM_001127649    | ---         |
| 8168689 | -0,73 | -1,66 | 0,00280 | -0,79 | -1,73 | 0,00242 | ---             | KCNJ13      |
| 8059776 | -0,73 | -1,66 | 0,08317 | -0,70 | -1,63 | 0,01372 | NM_002242       | SEC14L4     |
| 8072355 | -0,73 | -1,66 | 0,07009 | -0,81 | -1,76 | 0,00795 | NM_174977       | AGAP3       |
| 8137381 | -0,73 | -1,66 | 0,13444 | 0,26  | 1,19  | 0,55060 | NM_031946       | ELF5        |
| 7947481 | -0,73 | -1,66 | 0,08830 | -1,67 | -3,18 | 0,00428 | NM_198381       | ---         |
| 7939938 | -0,73 | -1,66 | 0,15640 | -1,98 | -3,93 | 0,00139 | ---             | ATP1A2      |
| 7906501 | -0,73 | -1,66 | 0,24536 | -0,40 | -1,32 | 0,15359 | NM_000702       | PADI6       |
| 7898466 | -0,73 | -1,66 | 0,08282 | -0,57 | -1,48 | 0,18191 | NM_207421       | CYTH4       |
| 8072798 | -0,73 | -1,66 | 0,09336 | -0,62 | -1,53 | 0,07554 | NM_013385       | IL1F9       |
| 8044541 | -0,73 | -1,66 | 0,03495 | -2,07 | -4,20 | 0,00513 | NM_019618       | ---         |
| 8053646 | -0,73 | -1,66 | 0,13166 | -0,70 | -1,63 | 0,04278 | ---             | DNAJC6      |
| 7902043 | -0,73 | -1,66 | 0,04547 | 0,95  | 1,93  | 0,06657 | NM_014787       | PGA5        |
| 7940441 | -0,73 | -1,66 | 0,26854 | -1,41 | -2,66 | 0,03651 | NM_014224       | EXPH5       |
| 7951545 | -0,73 | -1,66 | 0,04505 | 2,52  | 5,75  | 0,00406 | NM_015065       | AKD1        |
| 8128788 | -0,73 | -1,66 | 0,08341 | -1,01 | -2,01 | 0,01468 | NM_001145128    | TTC28       |
| 8072133 | -0,73 | -1,66 | 0,03618 | -1,23 | -2,34 | 0,02127 | NM_001145418    | LOC149620   |
| 7903935 | -0,73 | -1,66 | 0,15384 | -1,03 | -2,04 | 0,00003 | NR_003928       | ---         |
| 8079588 | -0,74 | -1,66 | 0,00143 | -1,56 | -2,96 | 0,00170 | ---             | FZD5        |
| 8058498 | -0,74 | -1,66 | 0,12264 | 1,25  | 2,39  | 0,00393 | NM_003468       | ---         |
| 8009349 | -0,74 | -1,66 | 0,08369 | -1,02 | -2,02 | 0,02116 | ---             | C12orf43    |
| 7967109 | -0,74 | -1,66 | 0,01639 | -0,06 | -1,04 | 0,81685 | BC014661        | KRTAP10-5   |
| 8070782 | -0,74 | -1,66 | 0,06164 | -0,51 | -1,43 | 0,16070 | NM_198694       | ACOT7       |
| 7912012 | -0,74 | -1,66 | 0,01821 | -0,98 | -1,97 | 0,05066 | NM_007274       | ---         |
| 7972334 | -0,74 | -1,67 | 0,01951 | -1,24 | -2,36 | 0,00036 | ---             | ---         |
| 8100756 | -0,74 | -1,67 | 0,38679 | -2,50 | -5,64 | 0,00025 | ---             | ZNF496      |
| 7925705 | -0,74 | -1,67 | 0,03361 | -0,23 | -1,17 | 0,60076 | NM_032752       | CADM2       |
| 8081036 | -0,74 | -1,67 | 0,09496 | -1,08 | -2,12 | 0,01623 | NM_001167674    | ---         |
| 8164808 | -0,74 | -1,67 | 0,12037 | -1,70 | -3,24 | 0,01271 | ---             | C4orf40     |
| 8095451 | -0,74 | -1,67 | 0,08175 | -1,51 | -2,84 | 0,00187 | NM_214711       | MAK         |
| 8123893 | -0,74 | -1,67 | 0,05962 | -0,87 | -1,83 | 0,01367 | NM_005906       | SLC22A6     |
| 7948920 | -0,74 | -1,67 | 0,19103 | -1,05 | -2,07 | 0,00470 | NM_004790       | CALB1       |
| 8151730 | -0,74 | -1,67 | 0,07734 | -1,56 | -2,95 | 0,00482 | NM_004929       | SNORD12C    |
| 8063345 | -0,74 | -1,67 | 0,07567 | -0,58 | -1,50 | 0,00881 | NR_002433       | PRDM16      |
| 7897132 | -0,74 | -1,67 | 0,00604 | -0,74 | -1,67 | 0,02094 | NM_022114       | C22orf37    |
| 8071134 | -0,74 | -1,67 | 0,01158 | -2,22 | -4,65 | 0,00138 | ENST00000444596 | ---         |
| 7930612 | -0,74 | -1,67 | 0,18781 | -1,16 | -2,23 | 0,01782 | ---             | SNORD115-20 |
| 7982046 | -0,74 | -1,67 | 0,40518 | -1,83 | -3,56 | 0,00003 | NR_003312       | SAA3P       |
| 7946972 | -0,74 | -1,67 | 0,16350 | -0,60 | -1,52 | 0,04301 | NR_026576       | HEMK1       |
| 8080001 | -0,74 | -1,67 | 0,12571 | 0,30  | 1,23  | 0,24561 | NM_016173       | ZNF846      |
| 8033809 | -0,74 | -1,67 | 0,08506 | -0,39 | -1,31 | 0,16652 | NM_001077624    | C17orf54    |
| 8018156 | -0,74 | -1,67 | 0,01596 | -0,89 | -1,85 | 0,05013 | AK097638        | PPP1R12C    |
| 8039316 | -0,74 | -1,67 | 0,13194 | -0,69 | -1,61 | 0,08800 | NM_017607       | ---         |
| 8054790 | -0,74 | -1,67 | 0,18370 | -1,00 | -2,01 | 0,02374 | ---             | ---         |
| 8154414 | -0,74 | -1,67 | 0,00997 | -1,25 | -2,38 | 0,00925 | ---             | SLC16A10    |
| 8121515 | -0,74 | -1,67 | 0,34216 | 1,37  | 2,58  | 0,03707 | NM_018593       | CD83        |
| 8116983 | -0,74 | -1,67 | 0,10077 | -0,22 | -1,16 | 0,37901 | NM_004233       | ---         |
| 7965650 | -0,74 | -1,67 | 0,09524 | -0,78 | -1,72 | 0,02287 | ---             | WDR62       |
| 8028119 | -0,74 | -1,67 | 0,09248 | 0,55  | 1,47  | 0,06803 | NM_001083961    | PTH2R       |
| 8047910 | -0,74 | -1,67 | 0,06156 | -1,19 | -2,28 | 0,00000 | NM_005048       | DEFB4A      |
| 8144481 | -0,74 | -1,67 | 0,19051 | -1,53 | -2,88 | 0,00183 | NM_004942       | DEFB4A      |
| 8149169 | -0,74 | -1,67 | 0,19051 | -1,53 | -2,88 | 0,00183 | NM_004942       | OR10T2      |

|                                  |       |       |         |       |       |         |                                     |                      |
|----------------------------------|-------|-------|---------|-------|-------|---------|-------------------------------------|----------------------|
| 7921354                          | -0,74 | -1,67 | 0,02941 | -0,95 | -1,93 | 0,16485 | NM_001004475                        | TRAPPC5              |
| 8025296                          | -0,74 | -1,67 | 0,18295 | 1,27  | 2,41  | 0,02511 | NM_174894                           | SPIRE2               |
| 7998015                          | -0,74 | -1,67 | 0,04086 | -0,16 | -1,12 | 0,72771 | NM_032451                           | GSTM2P1              |
| 8128890                          | -0,74 | -1,67 | 0,07632 | -1,44 | -2,72 | 0,00117 | NR_002932                           | C3orf79              |
| 8083463                          | -0,74 | -1,67 | 0,24974 | -0,76 | -1,69 | 0,01950 | NM_001101337                        | CENPH                |
| 8105842                          | -0,74 | -1,67 | 0,13178 | 0,21  | 1,15  | 0,38300 | NM_022909                           | ---                  |
| 8066029                          | -0,74 | -1,67 | 0,00951 | -0,89 | -1,86 | 0,00287 | ---                                 | OR52H1               |
| 7946087                          | -0,74 | -1,67 | 0,20648 | -1,55 | -2,93 | 0,00064 | NM_001005289                        | ---                  |
| 8054090                          | -0,74 | -1,67 | 0,01547 | -0,49 | -1,40 | 0,01036 | ---                                 | SPDYA                |
| 8041138                          | -0,74 | -1,67 | 0,06965 | -0,90 | -1,86 | 0,01298 | NM_182756                           | A1BG                 |
| 8039748                          | -0,74 | -1,67 | 0,41214 | -0,24 | -1,18 | 0,13347 | NM_130786                           | C1orf116             |
| 7923958                          | -0,74 | -1,67 | 0,16755 | 2,11  | 4,31  | 0,00234 | NM_023938                           | FCRL5                |
| 7921237                          | -0,74 | -1,67 | 0,16372 | -1,24 | -2,36 | 0,00866 | NM_031281                           | LOC442132            |
| 8110916                          | -0,74 | -1,67 | 0,48619 | -1,62 | -3,08 | 0,00933 | ENST00000382550                     | ZNF48                |
| 7994813                          | -0,74 | -1,67 | 0,05117 | 1,12  | 2,18  | 0,04412 | NM_152652                           | FLJ14107             |
| 8149718                          | -0,74 | -1,67 | 0,16225 | -1,85 | -3,60 | 0,01284 | NR_027715                           | ---                  |
| 8064926                          | -0,74 | -1,67 | 0,07208 | -1,31 | -2,48 | 0,00787 | ---                                 | CCDC79               |
| 8001858                          | -0,74 | -1,67 | 0,18350 | -1,02 | -2,02 | 0,00166 | NM_001136505                        | HDAC5                |
| 8015914                          | -0,74 | -1,67 | 0,04221 | 0,19  | 1,14  | 0,41414 | NM_005474                           | ---                  |
| 7953685                          | -0,74 | -1,67 | 0,00007 | -1,28 | -2,42 | 0,00347 | ---                                 | ---                  |
| 8172658                          | -0,74 | -1,67 | 0,05696 | -1,33 | -2,51 | 0,01222 | ---                                 | GAL3ST1              |
| 8075401                          | -0,74 | -1,67 | 0,13533 | 1,39  | 2,62  | 0,01393 | NM_004861                           | HLA-DRB5             |
| 8125436                          | -0,74 | -1,67 | 0,05262 | -0,47 | -1,39 | 0,08274 | NM_002125                           | FAM98C               |
| 8028397                          | -0,74 | -1,67 | 0,15332 | 0,37  | 1,29  | 0,40486 | NM_174905                           | AHSA2                |
| 8042195                          | -0,74 | -1,67 | 0,04624 | 1,23  | 2,34  | 0,02191 | NM_152392                           | BAAT                 |
| 8162870                          | -0,74 | -1,67 | 0,12112 | -1,24 | -2,35 | 0,00254 | NM_001701                           | TRIM67               |
| 7910503                          | -0,74 | -1,67 | 0,25000 | -1,76 | -3,38 | 0,02185 | NM_001004342                        | OR5AP2               |
| 7948155                          | -0,74 | -1,67 | 0,06469 | -0,93 | -1,91 | 0,00037 | NM_001002925                        | ANXA9                |
| 7905283                          | -0,74 | -1,67 | 0,03267 | -0,46 | -1,37 | 0,02476 | NM_003568                           | BOLA1                |
| 7905092                          | -0,74 | -1,67 | 0,18473 | 1,68  | 3,21  | 0,02834 | NM_016074                           | ---                  |
| 7906233                          | -0,74 | -1,67 | 0,13774 | -0,88 | -1,85 | 0,25100 | ---                                 | 04. Sep              |
| 8017039                          | -0,74 | -1,67 | 0,09062 | -0,33 | -1,26 | 0,05424 | NM_080415                           | OR1N2                |
| 8157674                          | -0,74 | -1,67 | 0,23118 | -1,51 | -2,85 | 0,07047 | NM_001004457                        | ---                  |
| 8059714                          | -0,74 | -1,67 | 0,36798 | -0,70 | -1,62 | 0,25738 | ---                                 | ---                  |
| 7992954                          | -0,74 | -1,67 | 0,11183 | -0,72 | -1,65 | 0,02832 | ---                                 | FRAT2                |
| 7935421                          | -0,74 | -1,67 | 0,03533 | -1,08 | -2,12 | 0,06188 | NM_012083                           | ZMAT4                |
| 8150419                          | -0,74 | -1,67 | 0,12781 | -1,95 | -3,87 | 0,00071 | NM_024645                           | MIR494               |
| 7976834                          | -0,74 | -1,67 | 0,01117 | -0,94 | -1,93 | 0,11600 | NR_030174                           | STK32B               |
| 8093858                          | -0,74 | -1,67 | 0,09732 | -0,77 | -1,71 | 0,00066 | NM_018401                           | GUCA1C               |
| 8089402                          | -0,74 | -1,67 | 0,08752 | -1,01 | -2,02 | 0,12679 | NM_005459                           | BMP8A                |
| 7900340                          | -0,74 | -1,67 | 0,07722 | 0,37  | 1,29  | 0,41851 | NM_181809                           | RUNX3                |
| 7913805                          | -0,74 | -1,67 | 0,12718 | 0,00  | 1,00  | 0,99634 | NM_001031680                        | ---                  |
| 7968632                          | -0,74 | -1,67 | 0,06388 | -1,12 | -2,17 | 0,00659 | ---                                 | ---                  |
| 8094946                          | -0,74 | -1,67 | 0,06822 | -0,91 | -1,88 | 0,01022 | ---                                 | PTPRE                |
| 7931353                          | -0,74 | -1,67 | 0,07138 | 2,09  | 4,26  | 0,01397 | NM_006504                           | ---                  |
| 8019517                          | -0,74 | -1,67 | 0,07596 | -1,19 | -2,28 | 0,00270 | ---                                 | PLEKHG4B             |
| 8104141                          | -0,74 | -1,67 | 0,22403 | 0,42  | 1,34  | 0,33703 | NM_052909                           | ZNF527               |
| 8028241                          | -0,74 | -1,67 | 0,14168 | -0,98 | -1,97 | 0,12272 | NM_032453                           | ---                  |
| 8050687                          | -0,74 | -1,67 | 0,10551 | -0,77 | -1,70 | 0,08660 | ---                                 | ---                  |
| 8057557                          | -0,74 | -1,67 | 0,24069 | -0,73 | -1,66 | 0,00092 | ---                                 | TMPRSS5              |
| 7951717                          | -0,74 | -1,67 | 0,00418 | -1,15 | -2,22 | 0,00192 | NM_030770                           | FAAH                 |
| 7901229                          | -0,74 | -1,67 | 0,10708 | 0,17  | 1,12  | 0,75689 | NM_001441                           | MMP7                 |
| 7951217                          | -0,74 | -1,67 | 0,00030 | -1,16 | -2,23 | 0,00446 | NM_002423                           | C11orf68             |
| 7949540                          | -0,74 | -1,67 | 0,13386 | 0,19  | 1,14  | 0,77729 | NM_001135635                        | ---                  |
| 8067981                          | -0,74 | -1,67 | 0,06268 | -0,95 | -1,93 | 0,00553 | ---                                 | ---                  |
| 8133110                          | -0,74 | -1,67 | 0,14789 | -0,37 | -1,29 | 0,39097 | ---                                 | C10orf129            |
| 7929497                          | -0,74 | -1,67 | 0,00051 | -0,93 | -1,91 | 0,01572 | NM_207321                           | MYH13                |
| 8012625                          | -0,74 | -1,67 | 0,04283 | -0,97 | -1,96 | 0,03021 | NM_003802                           | IGKC // IGKC // IGKC |
| // IGKC // IGKC // IGKC          |       |       |         |       |       |         |                                     |                      |
| 8043465                          | -0,74 | -1,67 | 0,27115 | -1,39 | -2,63 | 0,00159 | BC029444 // BC029444 // BC029444 // |                      |
| BC029444 // BC029444 // BC029444 |       |       | OR2L2   |       |       |         |                                     |                      |
| 7911252                          | -0,74 | -1,67 | 0,23107 | -1,75 | -3,37 | 0,03817 | NM_001004686                        | KCNAB3               |
| 8012285                          | -0,74 | -1,67 | 0,00346 | -0,76 | -1,69 | 0,04414 | NM_004732                           | ERLIN2               |
| 8150214                          | -0,74 | -1,67 | 0,19562 | -0,58 | -1,49 | 0,21988 | NM_007175                           | ---                  |
| 8009073                          | -0,74 | -1,67 | 0,17737 | -0,98 | -1,97 | 0,02953 | ---                                 | ZNF653               |
| 8034276                          | -0,74 | -1,67 | 0,03331 | -0,67 | -1,59 | 0,07364 | NM_138783                           | OR10H2               |
| 8026483                          | -0,74 | -1,67 | 0,18963 | -1,24 | -2,36 | 0,01807 | NM_013939                           | GCNT7                |
| 8067178                          | -0,74 | -1,67 | 0,19206 | -0,90 | -1,86 | 0,13370 | NM_080615                           | TYRP1                |
| 8154367                          | -0,74 | -1,67 | 0,16882 | -0,66 | -1,57 | 0,02012 | NM_000550                           | NCAN                 |
| 8027152                          | -0,74 | -1,67 | 0,16169 | -0,81 | -1,75 | 0,02405 | NM_004386                           | LRRC67               |
| 8151127                          | -0,74 | -1,67 | 0,04408 | -0,91 | -1,88 | 0,00723 | NM_001013626                        | TRAV8-3              |
| 7973298                          | -0,74 | -1,67 | 0,11122 | -1,21 | -2,32 | 0,00040 | X58769 CASQ2                        |                      |
| 7918878                          | -0,74 | -1,67 | 0,28239 | -1,23 | -2,34 | 0,01161 | NM_001232                           | TMEM95               |

|         |       |       |         |        |       |         |                 |              |
|---------|-------|-------|---------|--------|-------|---------|-----------------|--------------|
| 8004364 | -0,74 | -1,67 | 0,07682 | -0,86  | -1,81 | 0,04622 | NM_198154       | ZDHC8P1      |
| 8074892 | -0,74 | -1,67 | 0,16321 | -1,70  | -3,25 | 0,00923 | NR_003950       | MIR211       |
| 7987097 | -0,74 | -1,67 | 0,02600 | -1,37  | -2,59 | 0,01180 | NR_029624       | SLAMF8       |
| 7906486 | -0,74 | -1,67 | 0,03125 | -1,00  | -1,99 | 0,00318 | NM_020125       | ---          |
| 8065013 | -0,74 | -1,67 | 0,08081 | -1,27  | -2,41 | 0,02814 | ---             | PSMB11       |
| 7973369 | -0,74 | -1,67 | 0,20152 | -0,83  | -1,78 | 0,06352 | NM_001099780    | ABCA11P      |
| 8098752 | -0,74 | -1,67 | 0,03330 | -0,84  | -1,80 | 0,01028 | NR_002451       | ---          |
| 7934568 | -0,74 | -1,67 | 0,00092 | -1,00  | -2,00 | 0,00042 | ---             | ---          |
| 7916018 | -0,74 | -1,67 | 0,02425 | -0,86  | -1,81 | 0,02726 | ---             | ---          |
| 8146892 | -0,74 | -1,67 | 0,09016 | -1,33  | -2,52 | 0,00121 | ---             | LOC100133315 |
| 7950082 | -0,74 | -1,67 | 0,12968 | 2,65   | 6,30  | 0,00006 | NR_029192       | SUMO1P1      |
| 8067121 | -0,74 | -1,67 | 0,02245 | -0,32  | -1,25 | 0,26028 | NR_002189       | ZBTB11       |
| 8081358 | -0,74 | -1,67 | 0,22848 | -0,65  | -1,56 | 0,08339 | NM_014415       | RAB39B       |
| 8176230 | -0,74 | -1,67 | 0,15898 | -0,123 | -1,09 | 0,61362 | NM_171998       | ---          |
| 8103892 | -0,74 | -1,67 | 0,08876 | -0,48  | -1,40 | 0,02845 | ---             | FBXO15       |
| 8023843 | -0,74 | -1,67 | 0,17774 | -0,34  | -1,27 | 0,13584 | NM_152676       | POLE         |
| 7967736 | -0,74 | -1,67 | 0,03045 | 1,83   | 3,55  | 0,00080 | NM_006231       | SNORD115-37  |
| 7982080 | -0,74 | -1,68 | 0,03831 | -0,90  | -1,86 | 0,00160 | NR_003352       | DPPA4        |
| 8089448 | -0,74 | -1,68 | 0,04500 | -1,03  | -2,05 | 0,00720 | NM_018189       | SSX5         |
| 8172387 | -0,74 | -1,68 | 0,08137 | -0,59  | -1,51 | 0,02820 | NM_021015       | MST1P2       |
| 7898357 | -0,74 | -1,68 | 0,03077 | -0,27  | -1,21 | 0,48139 | NR_027504       | FAM133A      |
| 8168678 | -0,74 | -1,68 | 0,22453 | -0,33  | -1,26 | 0,02348 | NM_001171110    | LRRC10       |
| 7964846 | -0,74 | -1,68 | 0,08356 | -1,40  | -2,64 | 0,00066 | NM_201550       | KCNIP4       |
| 8099593 | -0,74 | -1,68 | 0,13418 | -1,21  | -2,31 | 0,00519 | NM_147182       | PPBP         |
| 8100971 | -0,74 | -1,68 | 0,08669 | -1,28  | -2,43 | 0,09315 | NM_002704       | TRPM1        |
| 7987068 | -0,74 | -1,68 | 0,00379 | -0,99  | -1,99 | 0,00129 | NM_002420       | ---          |
| 7944952 | -0,74 | -1,68 | 0,19508 | -0,41  | -1,33 | 0,17033 | ---             | CDSN         |
| 8178442 | -0,74 | -1,68 | 0,49039 | -1,72  | -3,29 | 0,00896 | NM_001264       | LBR          |
| 7910096 | -0,74 | -1,68 | 0,06060 | -1,19  | -2,29 | 0,00088 | NM_002296       | ALKBH6       |
| 8036242 | -0,74 | -1,68 | 0,17321 | 0,78   | 1,72  | 0,20326 | NM_032878       | EIF4E1B      |
| 8110218 | -0,74 | -1,68 | 0,17765 | -0,76  | -1,69 | 0,00062 | NM_001099408    | FJX1         |
| 7939365 | -0,75 | -1,68 | 0,18820 | 0,70   | 1,62  | 0,00318 | NM_014344       | ---          |
| 8050654 | -0,75 | -1,68 | 0,29853 | -0,74  | -1,68 | 0,00006 | ---             | ---          |
| 8099091 | -0,75 | -1,68 | 0,30420 | -0,96  | -1,95 | 0,18551 | ---             | PTPRZ1       |
| 8135774 | -0,75 | -1,68 | 0,00322 | -0,57  | -1,48 | 0,05979 | NM_002851       | CCDC102A     |
| 8001576 | -0,75 | -1,68 | 0,08109 | -0,44  | -1,35 | 0,29709 | NM_033212       | CD300LG      |
| 8007537 | -0,75 | -1,68 | 0,04361 | -1,87  | -3,65 | 0,00015 | NM_145273       | ---          |
| 7950117 | -0,75 | -1,68 | 0,24410 | -0,61  | -1,52 | 0,03817 | ---             | BIRC5        |
| 8018860 | -0,75 | -1,68 | 0,00226 | -0,71  | -1,63 | 0,01284 | NM_001168       | WNT9A        |
| 7924832 | -0,75 | -1,68 | 0,13942 | -0,49  | -1,40 | 0,15145 | NM_003395       | HYDIN        |
| 8002470 | -0,75 | -1,68 | 0,17922 | -1,55  | -2,93 | 0,00106 | NM_032821       | LY6G6C       |
| 8178586 | -0,75 | -1,68 | 0,16311 | -1,16  | -2,24 | 0,09593 | NM_025261       | XKR8         |
| 7899417 | -0,75 | -1,68 | 0,02790 | 1,35   | 2,54  | 0,02316 | NM_018053       | ---          |
| 8163105 | -0,75 | -1,68 | 0,00065 | -1,33  | -2,51 | 0,01038 | ---             | ---          |
| 7958826 | -0,75 | -1,68 | 0,05763 | -1,19  | -2,28 | 0,00414 | ---             | TM4SF18      |
| 8091402 | -0,75 | -1,68 | 0,01815 | -1,54  | -2,92 | 0,00653 | NM_138786       | MND1         |
| 8097857 | -0,75 | -1,68 | 0,02697 | -0,07  | -1,05 | 0,74094 | NM_032117       | OR5I1        |
| 7948109 | -0,75 | -1,68 | 0,29992 | -2,83  | -7,09 | 0,00255 | NM_006637       | ---          |
| 8088474 | -0,75 | -1,68 | 0,01700 | -0,56  | -1,47 | 0,03765 | ---             | SLC26A10     |
| 7956573 | -0,75 | -1,68 | 0,25011 | -0,05  | -1,03 | 0,78994 | NM_133489       | OR5V1        |
| 8178287 | -0,75 | -1,68 | 0,06282 | -1,02  | -2,03 | 0,00342 | NM_030876       | BAG1         |
| 8160647 | -0,75 | -1,68 | 0,34907 | 1,61   | 3,04  | 0,00494 | NM_004323       | ---          |
| 8173412 | -0,75 | -1,68 | 0,14968 | -0,53  | -1,44 | 0,10900 | ---             | CDH19        |
| 8023710 | -0,75 | -1,68 | 0,11243 | -1,13  | -2,20 | 0,01461 | NM_021153       | THEMIS       |
| 8129410 | -0,75 | -1,68 | 0,02163 | -0,88  | -1,84 | 0,00009 | NM_001164685    | NTRK2        |
| 8156134 | -0,75 | -1,68 | 0,05623 | -1,12  | -2,17 | 0,02169 | NM_006180       | ---          |
| 7975987 | -0,75 | -1,68 | 0,06428 | -0,79  | -1,72 | 0,07814 | ---             | OR51E2       |
| 7945991 | -0,75 | -1,68 | 0,25050 | -1,90  | -3,74 | 0,00462 | NM_030774       | MYOM3        |
| 7913727 | -0,75 | -1,68 | 0,03899 | -0,65  | -1,57 | 0,00210 | NM_152372       | SIM2         |
| 8068496 | -0,75 | -1,68 | 0,15608 | 1,00   | 2,00  | 0,05133 | NM_009586       | KRT40        |
| 8015152 | -0,75 | -1,68 | 0,07680 | -1,18  | -2,26 | 0,03051 | NM_182497       | KRT40        |
| 8019604 | -0,75 | -1,68 | 0,07680 | -1,18  | -2,26 | 0,03051 | NM_182497       | ---          |
| 7969768 | -0,75 | -1,68 | 0,04883 | -0,80  | -1,74 | 0,00184 | ---             | TFAP4        |
| 7999102 | -0,75 | -1,68 | 0,19709 | 0,05   | 1,03  | 0,73868 | NM_003223       | AP4S1        |
| 7973813 | -0,75 | -1,68 | 0,09053 | -0,74  | -1,67 | 0,13375 | NM_007077       | ---          |
| 8082163 | -0,75 | -1,68 | 0,52142 | -2,19  | -4,57 | 0,00333 | ---             | C20orf62     |
| 8066411 | -0,75 | -1,68 | 0,11994 | -1,50  | -2,83 | 0,00383 | ENST00000372910 | MMP25        |
| 7992811 | -0,75 | -1,68 | 0,19142 | -0,80  | -1,74 | 0,06194 | NM_022468       | ST8SIA6      |
| 7932407 | -0,75 | -1,68 | 0,09992 | -1,08  | -2,11 | 0,02929 | NM_001004470    | LOC440297    |
| 7985418 | -0,75 | -1,68 | 0,11464 | -1,28  | -2,43 | 0,01367 | ENST00000342039 | LOC440297    |
| 7985459 | -0,75 | -1,68 | 0,11464 | -1,28  | -2,43 | 0,01367 | ENST00000342039 | LOC440297    |
| 7990928 | -0,75 | -1,68 | 0,11464 | -1,28  | -2,43 | 0,01367 | ENST00000342039 | SLC26A5      |
| 8141922 | -0,75 | -1,68 | 0,19083 | -1,25  | -2,39 | 0,00880 | NM_198999       | FCRL4        |

|                        |       |       |         |       |        |         |                       |              |
|------------------------|-------|-------|---------|-------|--------|---------|-----------------------|--------------|
| 7921259                | -0,75 | -1,68 | 0,12022 | -0,78 | -1,71  | 0,15140 | NM_031282             | ASB2         |
| 7981020                | -0,75 | -1,68 | 0,05406 | -1,75 | -3,38  | 0,01186 | NM_016150             | ---          |
| 8112041                | -0,75 | -1,68 | 0,05749 | -0,51 | -1,42  | 0,00218 | ---                   | ---          |
| 8121347                | -0,75 | -1,68 | 0,19304 | -2,30 | -4,93  | 0,00115 | ---                   | ---          |
| 8017257                | -0,75 | -1,68 | 0,16525 | -0,94 | -1,93  | 0,00649 | ---                   | RAB17        |
| 8059955                | -0,75 | -1,68 | 0,00626 | 0,28  | 1,22   | 0,39562 | NM_022449             | CCDC135      |
| 7996117                | -0,75 | -1,68 | 0,20927 | -1,72 | -3,30  | 0,00665 | NM_032269             | CARD9        |
| 8165107                | -0,75 | -1,68 | 0,06434 | -0,19 | -1,14  | 0,56446 | NM_052813             | EVC2         |
| 8099144                | -0,75 | -1,68 | 0,01521 | -0,17 | -1,12  | 0,58214 | NM_147127             | GRID2        |
| 8096440                | -0,75 | -1,68 | 0,00022 | -1,19 | -2,28  | 0,00400 | NM_001510             | GRIN2A       |
| 7999364                | -0,75 | -1,68 | 0,00015 | -0,70 | -1,62  | 0,00624 | NM_001134407          | GGCT         |
| 8138857                | -0,75 | -1,68 | 0,00616 | 1,17  | 2,25   | 0,02986 | NM_024051             | UPK1B        |
| 8081826                | -0,75 | -1,68 | 0,18933 | -1,13 | -2,19  | 0,00152 | NM_006952             | OR13F1       |
| 8157012                | -0,75 | -1,68 | 0,24202 | -1,79 | -3,45  | 0,02942 | NM_001004485          | AAA1         |
| 8138958                | -0,75 | -1,68 | 0,00127 | -1,29 | -2,45  | 0,00000 | AY312368 LOC100128988 |              |
| 8062601                | -0,75 | -1,68 | 0,06647 | -1,21 | -2,32  | 0,08391 | AK023614 RAMP2        |              |
| 8007348                | -0,75 | -1,68 | 0,01701 | -1,24 | -2,36  | 0,05667 | NM_005854             | XCL2         |
| 7922127                | -0,75 | -1,68 | 0,00944 | -1,13 | -2,19  | 0,03264 | NM_003175             | SUN5         |
| 8065652                | -0,75 | -1,68 | 0,12767 | -1,95 | -3,86  | 0,00060 | NM_080675             | ---          |
| 8035144                | -0,75 | -1,68 | 0,01296 | -1,15 | -2,21  | 0,13699 | ---                   | LRFN2        |
| 8119390                | -0,75 | -1,68 | 0,15395 | -1,12 | -2,18  | 0,00196 | NM_020737             | C7orf49      |
| 8143065                | -0,75 | -1,68 | 0,04026 | 0,78  | 1,72   | 0,31212 | NR_024185             | CHCHD7       |
| 8146517                | -0,75 | -1,68 | 0,26314 | 2,00  | 3,99   | 0,00219 | NM_001011667          | CYSLTR2      |
| 7969050                | -0,75 | -1,68 | 0,10055 | -1,00 | -2,01  | 0,01419 | NM_020377             | GOT1L1       |
| 8150244                | -0,75 | -1,68 | 0,30027 | -0,46 | -1,37  | 0,07747 | NM_152413             | LOC440570 // |
| LOC440570              |       |       |         |       |        |         |                       |              |
| 7919580                | -0,75 | -1,68 | 0,47749 | -3,34 | -10,12 | 0,00113 | AK125737 // AK125737  |              |
| LOC440570 // LOC440570 |       |       |         |       |        |         |                       |              |
| 7919596                | -0,75 | -1,68 | 0,47749 | -3,34 | -10,12 | 0,00113 | AK125737 // AK125737  | PIH1D2       |
| 7951672                | -0,75 | -1,68 | 0,03093 | -0,37 | -1,29  | 0,21806 | NM_138789             | ---          |
| 8122740                | -0,75 | -1,68 | 0,29900 | -1,22 | -2,33  | 0,20599 | ---                   | ---          |
| 8131942                | -0,75 | -1,68 | 0,06060 | -0,89 | -1,86  | 0,12721 | ---                   | GIGYF1       |
| 8141595                | -0,75 | -1,68 | 0,02701 | -0,34 | -1,27  | 0,09991 | NM_022574             | MAGEE1       |
| 8168458                | -0,75 | -1,68 | 0,10854 | -0,81 | -1,76  | 0,02453 | NM_020932             | ZNF469       |
| 7997765                | -0,75 | -1,68 | 0,26225 | -1,98 | -3,96  | 0,00028 | NM_001127464          | ---          |
| 8058568                | -0,75 | -1,68 | 0,02943 | -1,22 | -2,33  | 0,02080 | ---                   | ---          |
| 8173922                | -0,75 | -1,68 | 0,12234 | -0,60 | -1,51  | 0,00127 | ---                   | FHL5         |
| 8121181                | -0,75 | -1,68 | 0,01518 | -0,67 | -1,59  | 0,02899 | NM_020482             | KRTAP4-9     |
| 8007115                | -0,75 | -1,68 | 0,60381 | -3,29 | -9,78  | 0,00293 | NM_001146041          | NANOG        |
| 7953675                | -0,75 | -1,68 | 0,12357 | -1,32 | -2,49  | 0,03867 | NM_024865             | ---          |
| 8014113                | -0,75 | -1,68 | 0,02943 | -1,06 | -2,08  | 0,00222 | ---                   | ELAVL3       |
| 8034263                | -0,75 | -1,68 | 0,01613 | -1,08 | -2,11  | 0,00780 | NM_001420             | COMMD9       |
| 7947528                | -0,75 | -1,68 | 0,12559 | 0,08  | 1,06   | 0,72144 | NM_014186             | SUN3         |
| 8139606                | -0,75 | -1,69 | 0,12469 | -0,61 | -1,52  | 0,06448 | NM_001030019          | ---          |
| 7912209                | -0,75 | -1,69 | 0,13125 | -0,77 | -1,71  | 0,33850 | ---                   | ---          |
| 7965838                | -0,75 | -1,69 | 0,00043 | -0,58 | -1,49  | 0,04137 | ---                   | CCDC26       |
| 8152821                | -0,75 | -1,69 | 0,06897 | -1,24 | -2,35  | 0,02006 | BC070152 LOC440993    |              |
| 8084917                | -0,75 | -1,69 | 0,05865 | -0,10 | -1,07  | 0,54289 | AK128346 C9orf163     |              |
| 8159350                | -0,75 | -1,69 | 0,06162 | -0,94 | -1,91  | 0,03352 | NM_152571             | FLJ39653     |
| 8094251                | -0,75 | -1,69 | 0,09804 | -0,23 | -1,17  | 0,59537 | NR_027696             | ---          |
| 8157227                | -0,75 | -1,69 | 0,06194 | -1,47 | -2,78  | 0,00548 | ---                   | FCGR3A       |
| 7921873                | -0,75 | -1,69 | 0,00208 | -1,11 | -2,15  | 0,01382 | NM_000569             | RAB39        |
| 7943577                | -0,75 | -1,69 | 0,05362 | -0,76 | -1,69  | 0,01939 | NM_017516             | PRSS48       |
| 8097794                | -0,75 | -1,69 | 0,14030 | -1,77 | -3,41  | 0,00029 | NM_183375             | CCNYL2       |
| 7933121                | -0,75 | -1,69 | 0,17041 | -0,51 | -1,42  | 0,03903 | ENST00000426433       | ---          |
| 8107857                | -0,75 | -1,69 | 0,16609 | -1,11 | -2,16  | 0,01601 | ---                   | FBXW12       |
| 8079615                | -0,75 | -1,69 | 0,02731 | -1,25 | -2,38  | 0,00007 | NM_207102             | FBXO9        |
| 8120271                | -0,75 | -1,69 | 0,02380 | -1,12 | -2,17  | 0,04871 | AK095307 OR52L1       |              |
| 7946115                | -0,75 | -1,69 | 0,00312 | -1,24 | -2,36  | 0,00788 | NM_001005173          | IGSF9B       |
| 7952813                | -0,75 | -1,69 | 0,07719 | 0,46  | 1,37   | 0,10974 | NM_014987             | GABRP        |
| 8109926                | -0,75 | -1,69 | 0,14876 | -0,75 | -1,69  | 0,04585 | NM_014211             | ---          |
| 7930179                | -0,75 | -1,69 | 0,03150 | -1,23 | -2,35  | 0,00002 | ---                   | ---          |
| 8175246                | -0,75 | -1,69 | 0,35262 | -1,65 | -3,14  | 0,00423 | ---                   | FLJ39061     |
| 8047492                | -0,75 | -1,69 | 0,03829 | -0,37 | -1,29  | 0,08547 | AK297413              | ---          |
| 8084810                | -0,75 | -1,69 | 0,00545 | -1,97 | -3,93  | 0,00015 | ---                   | OR7E87P      |
| 7942274                | -0,75 | -1,69 | 0,62778 | -2,97 | -7,85  | 0,00597 | ENST00000329336       | ---          |
| 8052016                | -0,75 | -1,69 | 0,01186 | -1,17 | -2,25  | 0,01589 | ---                   | ZNRF3        |
| 8072160                | -0,75 | -1,69 | 0,01299 | 0,26  | 1,19   | 0,28714 | NM_032173             | TPTE2        |
| 7970404                | -0,75 | -1,69 | 0,02163 | -1,78 | -3,44  | 0,00323 | NM_130785             | ---          |
| 8061916                | -0,75 | -1,69 | 0,13188 | -0,54 | -1,46  | 0,00230 | ---                   | ERC2         |
| 8088192                | -0,75 | -1,69 | 0,02119 | -0,69 | -1,61  | 0,02378 | NM_015576             | ---          |
| 7988623                | -0,76 | -1,69 | 0,12623 | -0,64 | -1,56  | 0,00889 | ---                   | HCN1         |
| 8111998                | -0,76 | -1,69 | 0,06509 | -1,68 | -3,21  | 0,00809 | NM_021072             | HNF1A        |



|         |       |       |         |       |       |         |                   |           |
|---------|-------|-------|---------|-------|-------|---------|-------------------|-----------|
| 7959234 | -0,76 | -1,69 | 0,15057 | -1,26 | -2,40 | 0,03692 | NM_000545         | SCN7A     |
| 8056518 | -0,76 | -1,69 | 0,02500 | -0,84 | -1,78 | 0,00647 | NM_002976         | ---       |
| 8133187 | -0,76 | -1,69 | 0,00004 | -0,38 | -1,30 | 0,17650 | ---               | ---       |
| 8142536 | -0,76 | -1,69 | 0,14509 | -1,15 | -2,22 | 0,00002 | ---               | PAX4      |
| 8142747 | -0,76 | -1,69 | 0,16045 | -1,66 | -3,15 | 0,00142 | NM_006193         | CRIPAK    |
| 8093494 | -0,76 | -1,69 | 0,04195 | 0,79  | 1,73  | 0,09883 | NM_175918         | MIR29A    |
| 8142975 | -0,76 | -1,69 | 0,02939 | -1,54 | -2,90 | 0,00268 | NR_029503         | ---       |
| 8151991 | -0,76 | -1,69 | 0,00360 | -0,47 | -1,38 | 0,05043 | ---               | GNL1      |
| 8179648 | -0,76 | -1,69 | 0,00902 | -0,31 | -1,24 | 0,48875 | NM_005275         | OR4C46    |
| 7948044 | -0,76 | -1,69 | 0,20144 | -1,58 | -3,00 | 0,01253 | NM_001004703      | ---       |
| 8146324 | -0,76 | -1,69 | 0,08367 | -0,89 | -1,86 | 0,04331 | ---               | ARHGAP39  |
| 8153876 | -0,76 | -1,69 | 0,00445 | -0,28 | -1,21 | 0,36898 | NM_025251         | CLEC18A   |
| 7997010 | -0,76 | -1,69 | 0,27376 | -0,96 | -1,95 | 0,07237 | NM_182619         | SNORA19   |
| 7936637 | -0,76 | -1,69 | 0,07739 | -0,95 | -1,93 | 0,00240 | NR_002917         | ---       |
| 7971243 | -0,76 | -1,69 | 0,07388 | -0,93 | -1,90 | 0,01555 | ---               | PIGQ      |
| 7991904 | -0,76 | -1,69 | 0,05402 | 1,16  | 2,24  | 0,07616 | NM_004204         | SIGLECS   |
| 8038877 | -0,76 | -1,69 | 0,40062 | -0,23 | -1,18 | 0,40128 | NM_003830         | ---       |
| 7989220 | -0,76 | -1,69 | 0,08213 | -0,99 | -1,98 | 0,00029 | ---               | OR10V1    |
| 7948418 | -0,76 | -1,69 | 0,17622 | -0,47 | -1,38 | 0,23493 | NM_001005324      | VIPR2     |
| 8144213 | -0,76 | -1,69 | 0,06797 | -0,57 | -1,48 | 0,04201 | NM_003382         | FPR1      |
| 8038899 | -0,76 | -1,69 | 0,02253 | -0,66 | -1,58 | 0,20942 | NM_002029         | ACAP1     |
| 8004331 | -0,76 | -1,69 | 0,03412 | -0,75 | -1,68 | 0,07502 | NM_014716         | RELT      |
| 7942439 | -0,76 | -1,69 | 0,00856 | -0,04 | -1,03 | 0,85563 | NM_032871         | ---       |
| 8175664 | -0,76 | -1,69 | 0,00021 | -1,43 | -2,69 | 0,00224 | ---               | CHST5     |
| 8002891 | -0,76 | -1,69 | 0,24445 | -1,06 | -2,09 | 0,00388 | NM_024533         | ---       |
| 7922460 | -0,76 | -1,69 | 0,00350 | -1,00 | -2,01 | 0,01203 | ---               | FCGR2A    |
| 7906757 | -0,76 | -1,69 | 0,41681 | -1,11 | -2,16 | 0,00130 | NM_001136219      | ---       |
| 8152090 | -0,76 | -1,69 | 0,14795 | -0,57 | -1,48 | 0,03841 | ---               | SCARNA15  |
| 7985480 | -0,76 | -1,69 | 0,08095 | -1,48 | -2,79 | 0,00023 | NR_003011         | IGLL3     |
| 8072004 | -0,76 | -1,69 | 0,29652 | -1,25 | -2,37 | 0,00796 | NR_029395         | MORN4     |
| 7935510 | -0,76 | -1,69 | 0,11054 | 1,63  | 3,10  | 0,00021 | NM_178832         | C19orf57  |
| 8034700 | -0,76 | -1,69 | 0,02935 | -0,20 | -1,15 | 0,56552 | BC119719 LOC29034 |           |
| 8048071 | -0,76 | -1,69 | 0,18000 | -0,96 | -1,94 | 0,00436 | NR_002763         | B3GAT2    |
| 8127484 | -0,76 | -1,69 | 0,06335 | -0,88 | -1,84 | 0,10388 | NM_080742         | WSCD1     |
| 8004152 | -0,76 | -1,69 | 0,15329 | 0,52  | 1,43  | 0,38719 | NM_015253         | CNTN6     |
| 8077299 | -0,76 | -1,69 | 0,10081 | -0,80 | -1,74 | 0,00056 | NM_014461         | C21orf57  |
| 8069340 | -0,76 | -1,69 | 0,09173 | 0,21  | 1,16  | 0,56861 | NM_058181         | CLLU10S   |
| 7965431 | -0,76 | -1,69 | 0,00311 | -0,52 | -1,43 | 0,04449 | NM_001025232      | ULBP3     |
| 8130176 | -0,76 | -1,69 | 0,13144 | 0,23  | 1,18  | 0,46934 | NM_024518         | ---       |
| 8106512 | -0,76 | -1,69 | 0,02133 | -0,45 | -1,36 | 0,11461 | ---               | ---       |
| 8094772 | -0,76 | -1,69 | 0,18955 | -1,60 | -3,02 | 0,00063 | ---               | SHANK2    |
| 7950042 | -0,76 | -1,69 | 0,00348 | 0,98  | 1,97  | 0,03094 | NM_012309         | FHAD1     |
| 7898124 | -0,76 | -1,69 | 0,04928 | -0,77 | -1,70 | 0,00422 | NM_052929         | ACOT2     |
| 7975602 | -0,76 | -1,69 | 0,20760 | 0,33  | 1,26  | 0,65407 | NM_006821         | SMAD7     |
| 8023220 | -0,76 | -1,69 | 0,03686 | -0,88 | -1,84 | 0,01010 | NM_005904         | ISM1      |
| 8061013 | -0,76 | -1,69 | 0,09696 | -0,55 | -1,46 | 0,17925 | NM_080826         | GALP      |
| 8031622 | -0,76 | -1,69 | 0,14585 | -0,72 | -1,64 | 0,08557 | NM_033106         | ---       |
| 7971013 | -0,76 | -1,69 | 0,43972 | -1,48 | -2,78 | 0,11979 | ---               | CCDC65    |
| 7955156 | -0,76 | -1,69 | 0,10152 | -0,91 | -1,88 | 0,01490 | NM_033124         | SNORA16B  |
| 7909601 | -0,76 | -1,69 | 0,01147 | -1,13 | -2,19 | 0,01383 | NR_004389         | ANKS1B    |
| 7965686 | -0,76 | -1,69 | 0,00961 | 0,12  | 1,09  | 0,51334 | NM_152788         | NPTX2     |
| 8134463 | -0,76 | -1,69 | 0,21857 | -0,91 | -1,88 | 0,11756 | NM_002523         | PXT1      |
| 8126007 | -0,76 | -1,69 | 0,11194 | -1,24 | -2,36 | 0,07448 | NM_152990         | PRND      |
| 8060765 | -0,76 | -1,69 | 0,15672 | -1,05 | -2,07 | 0,10258 | NM_012409         | ATG4B     |
| 8077211 | -0,76 | -1,69 | 0,13170 | 1,61  | 3,06  | 0,02812 | NM_013325         | ZNF511    |
| 7931561 | -0,76 | -1,69 | 0,10635 | 0,94  | 1,92  | 0,03356 | NM_145806         | CST4      |
| 8065410 | -0,76 | -1,69 | 0,38561 | -0,02 | -1,02 | 0,97051 | NM_001899         | OR52J3    |
| 7937986 | -0,76 | -1,69 | 0,19586 | -1,88 | -3,67 | 0,03647 | NM_001001916      | C15orf59  |
| 7990269 | -0,76 | -1,69 | 0,15954 | -0,44 | -1,36 | 0,29901 | BC111368          | ---       |
| 7910587 | -0,76 | -1,69 | 0,12014 | -1,00 | -2,00 | 0,08330 | ---               | ---       |
| 8146647 | -0,76 | -1,69 | 0,15744 | -2,03 | -4,07 | 0,02250 | ---               | TDRD6     |
| 8120082 | -0,76 | -1,69 | 0,19373 | -1,41 | -2,65 | 0,00117 | NM_001010870      | CKMT2     |
| 8106689 | -0,76 | -1,69 | 0,29756 | -1,50 | -2,82 | 0,03440 | NM_001825         | ---       |
| 7930559 | -0,76 | -1,69 | 0,03061 | -0,63 | -1,55 | 0,03408 | ---               | ZNF204P   |
| 8124498 | -0,76 | -1,69 | 0,24191 | 2,33  | 5,02  | 0,00682 | NR_002722         | LOC150622 |
| 8040073 | -0,76 | -1,69 | 0,08530 | -0,72 | -1,65 | 0,13322 | NR_026832         | CCDC40    |
| 8010328 | -0,76 | -1,69 | 0,07017 | -0,77 | -1,70 | 0,09708 | NM_017950         | ---       |
| 8157520 | -0,76 | -1,69 | 0,09298 | -1,06 | -2,08 | 0,00273 | ---               | LETM1     |
| 8098924 | -0,76 | -1,69 | 0,05846 | 1,32  | 2,50  | 0,07078 | NM_012318         | EML5      |
| 7980636 | -0,76 | -1,69 | 0,00684 | 0,90  | 1,86  | 0,00480 | NM_183387         | ---       |
| 7964625 | -0,76 | -1,69 | 0,05017 | -0,94 | -1,91 | 0,01382 | ---               | KRT39     |
| 8015144 | -0,76 | -1,69 | 0,05267 | -1,11 | -2,16 | 0,00900 | NM_213656         | KRT39     |
| 8019614 | -0,76 | -1,69 | 0,05267 | -1,11 | -2,16 | 0,00900 | NM_213656         | PIN1L     |

|         |       |       |         |       |       |         |                  |           |
|---------|-------|-------|---------|-------|-------|---------|------------------|-----------|
| 7902267 | -0,76 | -1,69 | 0,08017 | -0,85 | -1,81 | 0,13024 | NR_023916        | ---       |
| 7907351 | -0,76 | -1,69 | 0,03229 | 0,14  | 1,11  | 0,55205 | --- KCNA2        | ---       |
| 7918449 | -0,76 | -1,69 | 0,14732 | -1,50 | -2,82 | 0,02549 | NM_004974        | PRAMEF12  |
| 7897974 | -0,76 | -1,69 | 0,31581 | -1,12 | -2,18 | 0,00354 | NM_001080830     | ---       |
| 8089295 | -0,76 | -1,69 | 0,10983 | -1,24 | -2,36 | 0,07336 | --- MAGEB1       | ---       |
| 8166619 | -0,76 | -1,69 | 0,23451 | -0,79 | -1,72 | 0,06874 | NM_002363        | ZNF783    |
| 8137118 | -0,76 | -1,69 | 0,04193 | -0,51 | -1,42 | 0,17138 | ENST000000378052 | CATSPER2  |
| 7988163 | -0,76 | -1,69 | 0,21765 | -0,59 | -1,51 | 0,10897 | NM_054020        | MIR130A   |
| 7940044 | -0,76 | -1,69 | 0,06955 | -0,95 | -1,93 | 0,00008 | NR_029673        | ---       |
| 7963263 | -0,76 | -1,69 | 0,10012 | -0,86 | -1,82 | 0,00060 | --- UBXN10       | ---       |
| 7898623 | -0,76 | -1,69 | 0,19304 | -0,66 | -1,58 | 0,00203 | NM_152376        | FILIP1    |
| 8127646 | -0,76 | -1,69 | 0,02310 | -1,03 | -2,05 | 0,00081 | NM_015687        | ZNF576    |
| 8029311 | -0,76 | -1,69 | 0,10933 | -0,49 | -1,40 | 0,00586 | NM_024327        | ---       |
| 8045525 | -0,76 | -1,69 | 0,22266 | -1,01 | -2,02 | 0,00004 | --- ---          | ---       |
| 8074615 | -0,76 | -1,69 | 0,14039 | -1,15 | -2,22 | 0,00307 | --- OPALIN       | ---       |
| 7935288 | -0,76 | -1,69 | 0,03520 | -0,76 | -1,70 | 0,00836 | NM_033207        | ITIH2     |
| 7926061 | -0,76 | -1,69 | 0,02020 | -0,89 | -1,86 | 0,00135 | NM_002216        | FCGR1A    |
| 7905047 | -0,76 | -1,69 | 0,04714 | -1,37 | -2,59 | 0,00314 | NM_000566        | ---       |
| 8106919 | -0,76 | -1,69 | 0,01588 | -0,66 | -1,58 | 0,09023 | --- CT45A3       | ---       |
| 8170068 | -0,76 | -1,69 | 0,21800 | -1,75 | -3,36 | 0,01305 | NM_001017435     | MAZ       |
| 7994637 | -0,76 | -1,70 | 0,04150 | 0,86  | 1,82  | 0,03798 | NM_001042539     | MGC24103  |
| 8160274 | -0,76 | -1,70 | 0,07051 | -1,00 | -1,99 | 0,11355 | AK021795 GPR34   | ---       |
| 8166906 | -0,76 | -1,70 | 0,09604 | -0,80 | -1,75 | 0,01345 | NM_001097579     | CREB3L3   |
| 8024754 | -0,76 | -1,70 | 0,30886 | -1,20 | -2,30 | 0,00766 | NM_032607        | ZNF777    |
| 8143714 | -0,76 | -1,70 | 0,00269 | 0,58  | 1,49  | 0,04985 | NM_015694        | SLC26A8   |
| 8125959 | -0,76 | -1,70 | 0,14938 | -1,01 | -2,01 | 0,04660 | NM_052961        | HIST1H3H  |
| 8117589 | -0,76 | -1,70 | 0,11628 | 1,25  | 2,37  | 0,10414 | NM_003536        | SNORA14A  |
| 8133688 | -0,76 | -1,70 | 0,13954 | -0,14 | -1,10 | 0,53812 | NR_002955        | GKN2      |
| 8052753 | -0,76 | -1,70 | 0,14727 | -0,61 | -1,53 | 0,05674 | NM_182536        | ---       |
| 8000700 | -0,76 | -1,70 | 0,04704 | -0,98 | -1,98 | 0,00381 | --- ---          | ---       |
| 8003599 | -0,76 | -1,70 | 0,04704 | -0,98 | -1,98 | 0,00381 | --- USHBP1       | ---       |
| 8035254 | -0,76 | -1,70 | 0,01151 | -1,26 | -2,39 | 0,01176 | NM_031941        | LOC401052 |
| 8085272 | -0,76 | -1,70 | 0,22093 | -1,15 | -2,22 | 0,00872 | AK022260 LMX1A   | ---       |
| 7921936 | -0,76 | -1,70 | 0,21542 | -1,66 | -3,16 | 0,02172 | NM_177398        | OR8B2     |
| 7952398 | -0,76 | -1,70 | 0,01208 | -1,21 | -2,31 | 0,00050 | NM_001005468     | GNGT2     |
| 8016532 | -0,76 | -1,70 | 0,00678 | -0,72 | -1,65 | 0,03008 | NM_031498        | ---       |
| 8170300 | -0,76 | -1,70 | 0,05693 | -0,71 | -1,63 | 0,03074 | --- CLCN2        | ---       |
| 8092473 | -0,76 | -1,70 | 0,19096 | -0,27 | -1,21 | 0,65742 | NM_004366        | VIL1      |
| 8048319 | -0,76 | -1,70 | 0,03123 | -0,50 | -1,42 | 0,00351 | NM_007127        | ---       |
| 7926594 | -0,76 | -1,70 | 0,20911 | -0,74 | -1,67 | 0,02132 | --- CXCL11       | ---       |
| 8101131 | -0,76 | -1,70 | 0,08909 | -0,49 | -1,40 | 0,24211 | NM_005409        | ---       |
| 8151099 | -0,76 | -1,70 | 0,24886 | -0,76 | -1,69 | 0,01733 | --- C1orf88      | ---       |
| 7903959 | -0,76 | -1,70 | 0,04875 | -0,59 | -1,51 | 0,07296 | NM_181643        | ---       |
| 8041900 | -0,76 | -1,70 | 0,07554 | 0,92  | 1,90  | 0,08510 | --- LOC338797    | ---       |
| 7959921 | -0,76 | -1,70 | 0,29006 | -1,03 | -2,04 | 0,04342 | AK098523 LHX2    | ---       |
| 8157751 | -0,76 | -1,70 | 0,24123 | 0,86  | 1,82  | 0,09531 | NM_004789        | BRD7P3    |
| 8121725 | -0,76 | -1,70 | 0,02200 | -1,03 | -2,05 | 0,04541 | NR_002730        | CORO7     |
| 7999120 | -0,76 | -1,70 | 0,07789 | 0,88  | 1,85  | 0,07140 | NM_024535        | OR1N1     |
| 8163958 | -0,76 | -1,70 | 0,17790 | -0,87 | -1,83 | 0,00338 | NM_012363        | ---       |
| 8131335 | -0,76 | -1,70 | 0,00499 | -0,84 | -1,79 | 0,02509 | --- HLA-DOA      | ---       |
| 8125545 | -0,76 | -1,70 | 0,05576 | -2,37 | -5,18 | 0,00560 | NM_002119        | PRIMA1    |
| 7981013 | -0,76 | -1,70 | 0,32848 | -0,83 | -1,78 | 0,01774 | NM_178013        | CD14      |
| 8114612 | -0,76 | -1,70 | 0,08140 | -0,79 | -1,72 | 0,01139 | NM_000591        | FAM75A7   |
| 8156253 | -0,76 | -1,70 | 0,23822 | -1,23 | -2,35 | 0,30559 | NM_015667        | ARL4C     |
| 8059854 | -0,76 | -1,70 | 0,02421 | -1,38 | -2,61 | 0,01429 | NM_005737        | LRRC45    |
| 8010719 | -0,76 | -1,70 | 0,00951 | -0,08 | -1,05 | 0,75379 | NM_144999        | ---       |
| 7942645 | -0,76 | -1,70 | 0,26614 | -1,03 | -2,04 | 0,00970 | --- ---          | ---       |
| 7961173 | -0,76 | -1,70 | 0,44314 | -1,73 | -3,32 | 0,19432 | --- ---          | ---       |
| 7951163 | -0,76 | -1,70 | 0,07163 | -0,96 | -1,95 | 0,01792 | --- ---          | ---       |
| 7985997 | -0,76 | -1,70 | 0,01577 | 1,20  | 2,30  | 0,03364 | --- ---          | ---       |
| 7925874 | -0,76 | -1,70 | 0,04916 | -1,48 | -2,78 | 0,00080 | --- MYCBPAP      | ---       |
| 8008350 | -0,76 | -1,70 | 0,11159 | -0,59 | -1,50 | 0,13070 | NM_032133        | KRTAP5-11 |
| 7950078 | -0,76 | -1,70 | 0,05240 | -2,11 | -4,33 | 0,00285 | NM_001005405     | RFTN1     |
| 8177072 | -0,76 | -1,70 | 0,08006 | -1,62 | -3,07 | 0,00398 | BC041884 SPO11   | ---       |
| 8063551 | -0,76 | -1,70 | 0,00386 | -0,84 | -1,79 | 0,00001 | NM_012444        | EMR4P     |
| 8033332 | -0,76 | -1,70 | 0,00978 | -0,99 | -1,98 | 0,01710 | NR_024075        | KRT33B    |
| 8015262 | -0,76 | -1,70 | 0,23030 | -1,64 | -3,11 | 0,01329 | NM_002279        | NEB       |
| 8055711 | -0,76 | -1,70 | 0,02395 | -0,91 | -1,88 | 0,00007 | NM_001164507     | ---       |
| 7926484 | -0,76 | -1,70 | 0,02614 | -0,63 | -1,55 | 0,07940 | --- STOML3       | ---       |
| 7971126 | -0,76 | -1,70 | 0,17631 | -1,15 | -2,22 | 0,01804 | NM_145286        | ---       |
| 8147445 | -0,76 | -1,70 | 0,01631 | -1,07 | -2,10 | 0,01590 | --- ---          | ---       |
| 8079058 | -0,76 | -1,70 | 0,05182 | -0,98 | -1,97 | 0,00068 | --- PMCH         | ---       |
| 7965867 | -0,76 | -1,70 | 0,08294 | -0,72 | -1,65 | 0,01770 | NM_002674        | PRAMEF13  |

|            |       |       |         |       |       |         |                 |              |
|------------|-------|-------|---------|-------|-------|---------|-----------------|--------------|
| 7912595    | -0,76 | -1,70 | 0,13951 | -1,30 | -2,45 | 0,01906 | NM_001024661    | PRAMEF13     |
| 7912610    | -0,76 | -1,70 | 0,13951 | -1,30 | -2,45 | 0,01906 | NM_001024661    | ---          |
| 8054039    | -0,76 | -1,70 | 0,13113 | -0,86 | -1,81 | 0,00675 | ---             | ---          |
| 7913556    | -0,76 | -1,70 | 0,00032 | -0,83 | -1,78 | 0,00393 | ---             | ---          |
| 7943777    | -0,76 | -1,70 | 0,04052 | -0,77 | -1,70 | 0,00591 | ---             | OR2H1        |
| 8117732    | -0,76 | -1,70 | 0,00786 | -1,03 | -2,04 | 0,00001 | NM_030883       | CAPZA3       |
| 7954240    | -0,76 | -1,70 | 0,18158 | -0,81 | -1,75 | 0,07929 | NM_033328       | ---          |
| 8175436    | -0,76 | -1,70 | 0,03338 | -0,52 | -1,44 | 0,06631 | ---             | CPO          |
| 8047829    | -0,76 | -1,70 | 0,25635 | -1,26 | -2,39 | 0,00072 | NM_173077       | C2orf54      |
| 8060187    | -0,77 | -1,70 | 0,05206 | -1,10 | -2,14 | 0,02365 | NM_001085437    | SNORD21      |
| 7903022    | -0,77 | -1,70 | 0,04385 | -0,59 | -1,51 | 0,01059 | NR_000006       | ---          |
| 8138287    | -0,77 | -1,70 | 0,10852 | -1,08 | -2,12 | 0,00778 | ---             | AATK         |
| 8019090    | -0,77 | -1,70 | 0,09823 | -1,42 | -2,68 | 0,01840 | NM_001080395    | RNPS1        |
| 7998774    | -0,77 | -1,70 | 0,08811 | 0,02  | 1,01  | 0,97137 | NM_080594       | ---          |
| 8089727    | -0,77 | -1,70 | 0,05614 | -0,51 | -1,43 | 0,01364 | ---             | C15orf51     |
| 7986503    | -0,77 | -1,70 | 0,39895 | -1,84 | -3,58 | 0,00634 | NR_003260       | CDH26        |
| 8063761    | -0,77 | -1,70 | 0,00271 | -0,85 | -1,81 | 0,00003 | NM_177980       | TAAR1        |
| 8129615    | -0,77 | -1,70 | 0,10107 | -1,25 | -2,37 | 0,03291 | NM_138327       | SETD1A       |
| 7994985    | -0,77 | -1,70 | 0,01707 | 0,33  | 1,26  | 0,22253 | NM_014712       | ---          |
| 8167638    | -0,77 | -1,70 | 0,13686 | -0,94 | -1,92 | 0,00122 | ---             | BCL3         |
| 8029465    | -0,77 | -1,70 | 0,01183 | 1,43  | 2,69  | 0,06725 | NM_005178       | FRMPD2       |
| 7933279    | -0,77 | -1,70 | 0,07261 | -1,03 | -2,04 | 0,01129 | NM_001018071    | FRMPD2       |
| 7933394    | -0,77 | -1,70 | 0,07261 | -1,03 | -2,04 | 0,01129 | NM_001018071    | FREM3        |
| 8102986    | -0,77 | -1,70 | 0,04629 | -0,70 | -1,63 | 0,00034 | NM_001168235    | TREM2        |
| 8126279    | -0,77 | -1,70 | 0,12300 | -0,71 | -1,63 | 0,05744 | NM_018965       | UGT2B15      |
| 8100737    | -0,77 | -1,70 | 0,05983 | -1,03 | -2,04 | 0,00072 | NM_001076       | UGT2B15      |
| 8100746    | -0,77 | -1,70 | 0,05983 | -1,03 | -2,04 | 0,00072 | NM_001076       | AQP7P1       |
| 8155554    | -0,77 | -1,70 | 0,22483 | -1,98 | -3,94 | 0,00373 | NR_002817       | SPATS1       |
| 8120011    | -0,77 | -1,70 | 0,00628 | -0,95 | -1,93 | 0,00173 | NM_145026       | TMEM65       |
| 8152750    | -0,77 | -1,70 | 0,14695 | 0,95  | 1,94  | 0,01287 | NM_194291       | ---          |
| 7935863    | -0,77 | -1,70 | 0,11341 | -1,96 | -3,88 | 0,00338 | ---             | PDZD3        |
| 7944478    | -0,77 | -1,70 | 0,17899 | -1,14 | -2,20 | 0,00078 | NR_033122       | CCHCR1       |
| 8178448    | -0,77 | -1,70 | 0,04432 | -0,39 | -1,31 | 0,12635 | NM_001105564    | ---          |
| 8080989    | -0,77 | -1,70 | 0,13260 | -1,26 | -2,39 | 0,00059 | ---             | HDAC6        |
| 8167369    | -0,77 | -1,70 | 0,01960 | 0,78  | 1,71  | 0,01484 | NM_006044       | FAM136B //   |
| FAM136B    |       |       |         |       |       |         |                 |              |
| 8116620    | -0,77 | -1,70 | 0,24094 | -0,78 | -1,72 | 0,04062 | NM_001012983 // | NM_001012983 |
| OK/SW-CL36 |       |       |         |       |       |         |                 |              |
| 8101501    | -0,77 | -1,70 | 0,03022 | -1,24 | -2,36 | 0,01126 | AB064670 RIMS3  |              |
| 7915333    | -0,77 | -1,70 | 0,03428 | 0,10  | 1,07  | 0,73765 | NM_014747       | NCRNA00185   |
| 8177214    | -0,77 | -1,70 | 0,03303 | -0,23 | -1,17 | 0,08042 | NR_001544       | C1orf49      |
| 7907633    | -0,77 | -1,70 | 0,22996 | -1,83 | -3,57 | 0,00790 | NM_032126       | ACCSL        |
| 7939494    | -0,77 | -1,70 | 0,22134 | -1,31 | -2,48 | 0,03688 | NM_001031854    | MIR27A       |
| 8034696    | -0,77 | -1,70 | 0,31266 | -1,10 | -2,14 | 0,00039 | NR_029501       | CT45A5       |
| 8175344    | -0,77 | -1,70 | 0,20322 | -1,50 | -2,83 | 0,00357 | NM_001007551    | ---          |
| 7967452    | -0,77 | -1,70 | 0,15720 | -1,54 | -2,91 | 0,02659 | ---             | LRP5L        |
| 8075052    | -0,77 | -1,70 | 0,07856 | -0,65 | -1,57 | 0,20267 | NM_182492       | SCG3         |
| 7983718    | -0,77 | -1,70 | 0,11971 | -1,01 | -2,02 | 0,00155 | NM_013243       | PRODH2       |
| 8036155    | -0,77 | -1,70 | 0,04062 | -1,61 | -3,06 | 0,00321 | NM_021232       | ANKRD34B     |
| 8112896    | -0,77 | -1,70 | 0,01388 | 0,10  | 1,08  | 0,38211 | NM_001004441    | DMBT1        |
| 7931108    | -0,77 | -1,70 | 0,11816 | -1,46 | -2,75 | 0,00076 | NM_007329       | PHPT1        |
| 8159441    | -0,77 | -1,70 | 0,18255 | 0,14  | 1,10  | 0,83509 | NM_001135861    | CLEC18B      |
| 7997032    | -0,77 | -1,70 | 0,18476 | -1,25 | -2,37 | 0,05895 | NM_001011880    | CHRNB4       |
| 7990729    | -0,77 | -1,70 | 0,04081 | -0,13 | -1,09 | 0,81064 | NM_000750       | HLA-DRA      |
| 8179481    | -0,77 | -1,70 | 0,01415 | 1,18  | 2,26  | 0,06059 | NM_019111       | SPINK5       |
| 8109001    | -0,77 | -1,70 | 0,01138 | -0,05 | -1,03 | 0,89836 | NM_001127698    | CARD14       |
| 8010379    | -0,77 | -1,70 | 0,01000 | -1,33 | -2,52 | 0,00419 | NM_024110       | ASB17        |
| 7917082    | -0,77 | -1,70 | 0,00521 | -0,89 | -1,85 | 0,01479 | NM_080868       | ZNRF4        |
| 8024934    | -0,77 | -1,70 | 0,30823 | -1,18 | -2,27 | 0,00242 | NM_181710       | ---          |
| 7990672    | -0,77 | -1,70 | 0,15976 | -1,15 | -2,22 | 0,00595 | ---             | IMPA2        |
| 8020183    | -0,77 | -1,70 | 0,03667 | 0,75  | 1,69  | 0,28965 | NM_014214       | IL1R2        |
| 8043981    | -0,77 | -1,70 | 0,18207 | -0,94 | -1,92 | 0,00274 | NM_004633       | FLJ44006     |
| 8054607    | -0,77 | -1,70 | 0,13762 | -0,82 | -1,77 | 0,07586 | AK125994        | ---          |
| 8141239    | -0,77 | -1,70 | 0,12476 | -1,31 | -2,47 | 0,01455 | ---             | SHMT1        |
| 8013243    | -0,77 | -1,70 | 0,10714 | 0,59  | 1,50  | 0,18437 | NM_004169       | TIGD7        |
| 7998952    | -0,77 | -1,70 | 0,05567 | -0,12 | -1,08 | 0,51864 | NM_033208       | ---          |
| 8042308    | -0,77 | -1,70 | 0,17631 | -1,39 | -2,62 | 0,01619 | ---             | ---          |
| 8171890    | -0,77 | -1,70 | 0,09838 | -1,09 | -2,13 | 0,00469 | ---             | ---          |
| 7951108    | -0,77 | -1,70 | 0,03696 | 0,25  | 1,19  | 0,56912 | ---             | PTCHD3       |
| 7932727    | -0,77 | -1,70 | 0,02061 | -1,07 | -2,11 | 0,02720 | NM_001034842    | AGR3         |
| 8138392    | -0,77 | -1,70 | 0,19227 | -0,81 | -1,75 | 0,03772 | NM_176813       | C12orf27     |
| 7967107    | -0,77 | -1,70 | 0,13595 | -1,66 | -3,16 | 0,01840 | NR_024345       | TTPA         |
| 8151042    | -0,77 | -1,70 | 0,00352 | -0,63 | -1,54 | 0,00031 | NM_000370       | KLHDC9       |

|         |       |       |         |       |       |         |              |           |
|---------|-------|-------|---------|-------|-------|---------|--------------|-----------|
| 7906642 | -0,77 | -1,70 | 0,00097 | -0,66 | -1,58 | 0,09279 | NM_152366    | ATAD3C    |
| 7896937 | -0,77 | -1,70 | 0,08710 | 0,00  | 1,00  | 0,99953 | NM_001039211 | ---       |
| 8139941 | -0,77 | -1,70 | 0,00366 | -1,10 | -2,15 | 0,03028 | ---          | ---       |
| 8137042 | -0,77 | -1,70 | 0,04082 | -1,20 | -2,30 | 0,00108 | ---          | SAG       |
| 8049301 | -0,77 | -1,70 | 0,11341 | -0,70 | -1,62 | 0,00821 | NM_000541    | CCDC86    |
| 7940349 | -0,77 | -1,70 | 0,02453 | -0,43 | -1,34 | 0,22672 | NM_024098    | ---       |
| 8138956 | -0,77 | -1,70 | 0,30052 | -1,13 | -2,19 | 0,01909 | ---          | ZNF77     |
| 8032544 | -0,77 | -1,70 | 0,11759 | 0,56  | 1,47  | 0,34282 | NM_021217    | ENTPD3    |
| 8078971 | -0,77 | -1,70 | 0,03843 | 0,13  | 1,09  | 0,54285 | NM_001248    | ---       |
| 7986325 | -0,77 | -1,70 | 0,02077 | -1,41 | -2,65 | 0,02058 | ---          | WDR65     |
| 7900639 | -0,77 | -1,71 | 0,01712 | -0,98 | -1,97 | 0,01692 | NR_030778    | DBH       |
| 8159096 | -0,77 | -1,71 | 0,04286 | -1,58 | -2,99 | 0,00018 | NM_000787    | SLC12A9   |
| 8134965 | -0,77 | -1,71 | 0,02237 | 0,29  | 1,22  | 0,55856 | NM_020246    | ---       |
| 7932528 | -0,77 | -1,71 | 0,18139 | -0,61 | -1,53 | 0,23606 | ---          | ASB10     |
| 8143887 | -0,77 | -1,71 | 0,01662 | -1,56 | -2,96 | 0,01247 | NM_001142459 | GRIN2C    |
| 8018220 | -0,77 | -1,71 | 0,09975 | -1,23 | -2,34 | 0,02071 | NM_000835    | ---       |
| 8097743 | -0,77 | -1,71 | 0,34181 | -0,12 | -1,09 | 0,59765 | ---          | KIF18B    |
| 8016139 | -0,77 | -1,71 | 0,02334 | 2,08  | 4,21  | 0,00080 | NM_001080443 | ---       |
| 8136457 | -0,77 | -1,71 | 0,02851 | -1,21 | -2,32 | 0,04622 | ---          | ENPEP     |
| 8096875 | -0,77 | -1,71 | 0,02760 | 1,12  | 2,18  | 0,05861 | NM_001977    | ZNF114    |
| 8030002 | -0,77 | -1,71 | 0,10138 | 1,29  | 2,45  | 0,00158 | NM_153608    | CTSG      |
| 7978351 | -0,77 | -1,71 | 0,24243 | -1,25 | -2,38 | 0,00619 | NM_001911    | C12orf60  |
| 7954132 | -0,77 | -1,71 | 0,00106 | -0,55 | -1,47 | 0,10718 | NM_175874    | PIP5K1P1  |
| 8116827 | -0,77 | -1,71 | 0,03664 | -0,90 | -1,87 | 0,17211 | NR_027712    | BTNL8     |
| 8116537 | -0,77 | -1,71 | 0,05471 | -1,59 | -3,02 | 0,00077 | NM_024850    | MGMT      |
| 7931379 | -0,77 | -1,71 | 0,04307 | 0,24  | 1,18  | 0,04633 | NM_002412    | ---       |
| 8068731 | -0,77 | -1,71 | 0,16482 | -1,11 | -2,16 | 0,08792 | ---          | MLKL      |
| 8002778 | -0,77 | -1,71 | 0,00160 | -0,16 | -1,12 | 0,61716 | NM_152649    | ODZ1      |
| 8174937 | -0,77 | -1,71 | 0,01669 | -0,74 | -1,66 | 0,02751 | NM_001163278 | C6orf222  |
| 8125980 | -0,77 | -1,71 | 0,03064 | -0,90 | -1,87 | 0,00744 | NM_001010903 | FLJ42418  |
| 8050095 | -0,77 | -1,71 | 0,00653 | -1,51 | -2,85 | 0,00030 | AK124409     | ---       |
| 8080962 | -0,77 | -1,71 | 0,26007 | -0,66 | -1,58 | 0,02585 | ---          | FLJ14100  |
| 7911699 | -0,77 | -1,71 | 0,35795 | -0,66 | -1,58 | 0,11625 | AK024162     | ---       |
| 8130401 | -0,77 | -1,71 | 0,04529 | -0,77 | -1,70 | 0,00052 | ---          | GRM2      |
| 8080128 | -0,77 | -1,71 | 0,07095 | -1,63 | -3,10 | 0,00128 | NM_000839    | C9orf167  |
| 8159667 | -0,77 | -1,71 | 0,07024 | 0,62  | 1,54  | 0,25153 | NM_017723    | ARMCX4    |
| 8168855 | -0,77 | -1,71 | 0,05745 | -0,58 | -1,50 | 0,07639 | NR_028407    | CCS       |
| 7941685 | -0,77 | -1,71 | 0,10165 | 0,91  | 1,88  | 0,05382 | NM_005125    | ---       |
| 8035234 | -0,77 | -1,71 | 0,04883 | -0,99 | -1,99 | 0,03294 | ---          | ---       |
| 7970702 | -0,77 | -1,71 | 0,00628 | -1,01 | -2,02 | 0,02470 | ---          | ---       |
| 7921623 | -0,77 | -1,71 | 0,21161 | -1,01 | -2,01 | 0,16817 | ---          | TBC1D30   |
| 7956826 | -0,77 | -1,71 | 0,09846 | 2,26  | 4,79  | 0,00096 | AB449914     | ATOX8     |
| 8043244 | -0,77 | -1,71 | 0,20501 | -1,29 | -2,45 | 0,11876 | NM_032827    | CGNL1     |
| 7983867 | -0,77 | -1,71 | 0,01647 | -0,75 | -1,68 | 0,00643 | NM_032866    | BTF3L1    |
| 7969479 | -0,77 | -1,71 | 0,03516 | -0,68 | -1,60 | 0,12147 | NR_026983    | GPR84     |
| 7963770 | -0,77 | -1,71 | 0,06721 | -0,46 | -1,38 | 0,03106 | NM_020370    | CD84      |
| 7921637 | -0,77 | -1,71 | 0,04175 | -1,01 | -2,02 | 0,01239 | NM_003874    | ---       |
| 7995629 | -0,77 | -1,71 | 0,01902 | -1,17 | -2,25 | 0,00219 | ---          | POU2F2    |
| 8037123 | -0,77 | -1,71 | 0,21107 | -1,87 | -3,65 | 0,01016 | NM_002698    | IFNE      |
| 8160435 | -0,77 | -1,71 | 0,00456 | -0,58 | -1,50 | 0,02562 | NM_176891    | RGSL1     |
| 7907977 | -0,77 | -1,71 | 0,01872 | -1,13 | -2,18 | 0,00869 | NM_001137669 | ---       |
| 7926834 | -0,77 | -1,71 | 0,14532 | -0,93 | -1,91 | 0,02373 | ---          | SUV39H1   |
| 8167347 | -0,77 | -1,71 | 0,02141 | 1,00  | 1,99  | 0,04263 | NM_003173    | MYT1L     |
| 8050031 | -0,77 | -1,71 | 0,05076 | -1,22 | -2,33 | 0,01493 | NM_015025    | C9orf130  |
| 8162562 | -0,77 | -1,71 | 0,06658 | -0,79 | -1,73 | 0,06892 | NR_023389    | FLJ46120  |
| 8091595 | -0,77 | -1,71 | 0,12382 | -1,13 | -2,19 | 0,00800 | AK128002     | ROPN1B    |
| 8082261 | -0,77 | -1,71 | 0,04089 | -0,57 | -1,48 | 0,04678 | NM_001012337 | ---       |
| 7924967 | -0,77 | -1,71 | 0,03187 | -1,14 | -2,21 | 0,00139 | ---          | C4orf31   |
| 8102587 | -0,77 | -1,71 | 0,13400 | -0,62 | -1,53 | 0,00897 | NM_024574    | OSTN      |
| 8084814 | -0,77 | -1,71 | 0,07293 | -0,85 | -1,80 | 0,03266 | NM_198184    | SLC38A10  |
| 8019149 | -0,77 | -1,71 | 0,15633 | -0,43 | -1,34 | 0,34190 | NM_001037984 | ACTL7A    |
| 8157141 | -0,77 | -1,71 | 0,10749 | -0,64 | -1,56 | 0,03262 | NM_006687    | PPP1R16A  |
| 8153835 | -0,77 | -1,71 | 0,20025 | -0,14 | -1,11 | 0,76209 | NM_032902    | TRPV6     |
| 8143499 | -0,77 | -1,71 | 0,05245 | -0,48 | -1,39 | 0,04997 | NM_018646    | DHRS4     |
| 7973448 | -0,77 | -1,71 | 0,00963 | 0,63  | 1,55  | 0,25290 | NM_021004    | TEKT3     |
| 8012908 | -0,77 | -1,71 | 0,00081 | -0,56 | -1,47 | 0,03242 | NM_031898    | ---       |
| 8090418 | -0,77 | -1,71 | 0,13668 | -1,11 | -2,16 | 0,00225 | ---          | TMPRSS11D |
| 8100664 | -0,77 | -1,71 | 0,05426 | -0,81 | -1,76 | 0,02551 | NM_004262    | NAT8      |
| 8053025 | -0,77 | -1,71 | 0,14107 | -1,86 | -3,63 | 0,00268 | NM_003960    | ---       |
| 8132915 | -0,77 | -1,71 | 0,05407 | -0,43 | -1,35 | 0,01251 | ---          | ARHGAP27  |
| 8016215 | -0,77 | -1,71 | 0,04480 | 0,52  | 1,44  | 0,34609 | NM_199282    | MYOM2     |
| 8144322 | -0,77 | -1,71 | 0,04873 | -0,93 | -1,91 | 0,00462 | NM_003970    | ZMYND17   |
| 7934384 | -0,77 | -1,71 | 0,05146 | -0,67 | -1,60 | 0,13725 | NM_001024593 | FGF16     |

|         |       |       |         |       |       |         |                    |             |
|---------|-------|-------|---------|-------|-------|---------|--------------------|-------------|
| 8168463 | -0,77 | -1,71 | 0,07369 | -0,95 | -1,93 | 0,00015 | NM_003868          | SLC13A4     |
| 8143110 | -0,77 | -1,71 | 0,02324 | -1,18 | -2,27 | 0,00155 | NM_012450          | ZNF474      |
| 8107591 | -0,77 | -1,71 | 0,00880 | -1,14 | -2,21 | 0,00084 | NM_207317          | SLC22A8     |
| 7948937 | -0,77 | -1,71 | 0,13687 | -0,65 | -1,57 | 0,02323 | NM_004254          | KLKP1       |
| 8038653 | -0,77 | -1,71 | 0,03754 | -1,14 | -2,21 | 0,02418 | NR_002948          | ZNF646      |
| 7995033 | -0,77 | -1,71 | 0,14035 | 0,17  | 1,13  | 0,67037 | NM_014699          | TMCC2       |
| 7909088 | -0,78 | -1,71 | 0,01219 | -0,77 | -1,70 | 0,00780 | NM_014858          | ANKRD18B    |
| 8154823 | -0,78 | -1,71 | 0,28436 | 2,52  | 5,75  | 0,00039 | ENST00000290943    | FLJ41649    |
| 8126240 | -0,78 | -1,71 | 0,02687 | -0,51 | -1,42 | 0,09364 | AK123643 C10orf126 |             |
| 7926882 | -0,78 | -1,71 | 0,14040 | -1,69 | -3,22 | 0,00103 | ENST00000375520    | ZCWPW2      |
| 8078319 | -0,78 | -1,71 | 0,08141 | -1,16 | -2,23 | 0,01903 | NM_001040432       | OR2M2       |
| 7911265 | -0,78 | -1,71 | 0,01028 | -1,20 | -2,29 | 0,00032 | NM_001004688       | TDRD5       |
| 7907749 | -0,78 | -1,71 | 0,05226 | -0,37 | -1,29 | 0,14596 | NM_173533          | FBLIM1      |
| 7898263 | -0,78 | -1,71 | 0,01831 | -0,07 | -1,05 | 0,80912 | NM_017556          | ---         |
| 8137472 | -0,78 | -1,71 | 0,15846 | -0,73 | -1,66 | 0,17166 | ---                | ---         |
| 8124156 | -0,78 | -1,71 | 0,02157 | -1,08 | -2,12 | 0,02133 | ---                | GPR171      |
| 8091503 | -0,78 | -1,71 | 0,09313 | -1,29 | -2,45 | 0,00072 | NM_013308          | SAGE1       |
| 8170076 | -0,78 | -1,71 | 0,16330 | -0,71 | -1,64 | 0,01293 | NM_018666          | ---         |
| 7969638 | -0,78 | -1,71 | 0,14564 | -1,99 | -3,97 | 0,00005 | ---                | P2RY10      |
| 8168524 | -0,78 | -1,71 | 0,07638 | -0,54 | -1,45 | 0,14770 | NM_014499          | BMPR1B      |
| 8096511 | -0,78 | -1,71 | 0,00447 | 1,77  | 3,41  | 0,00455 | NM_001203          | NCRNA00094  |
| 8159109 | -0,78 | -1,71 | 0,17077 | -0,31 | -1,24 | 0,62813 | NR_015427          | ---         |
| 8150212 | -0,78 | -1,71 | 0,04333 | -1,29 | -2,44 | 0,00277 | ---                | SNORD115-30 |
| 7982066 | -0,78 | -1,71 | 0,18562 | -2,05 | -4,14 | 0,00110 | NR_003345          | CXorf65     |
| 8173437 | -0,78 | -1,71 | 0,07407 | -0,91 | -1,88 | 0,01056 | NM_001025265       | CTAGE3      |
| 7971727 | -0,78 | -1,71 | 0,19074 | -0,29 | -1,22 | 0,03517 | AF338231 SEMA6C    |             |
| 7919898 | -0,78 | -1,71 | 0,10320 | -1,46 | -2,76 | 0,00071 | NM_001178061       | TUBGCP6     |
| 8076909 | -0,78 | -1,71 | 0,00640 | -0,72 | -1,64 | 0,01558 | NM_020461          | BHMT2       |
| 8106494 | -0,78 | -1,71 | 0,28556 | -1,45 | -2,73 | 0,08929 | NM_017614          | SPANXN1     |
| 8170302 | -0,78 | -1,71 | 0,17451 | -0,84 | -1,79 | 0,05389 | NM_001009614       | MGC13053    |
| 7952065 | -0,78 | -1,71 | 0,32445 | -1,33 | -2,52 | 0,00055 | ENST00000313693    | BMX         |
| 8166157 | -0,78 | -1,71 | 0,00189 | -1,13 | -2,19 | 0,00566 | NM_203281          | ---         |
| 7978626 | -0,78 | -1,71 | 0,14977 | -0,59 | -1,50 | 0,23442 | ---                | HAL         |
| 7965606 | -0,78 | -1,71 | 0,00549 | -0,63 | -1,55 | 0,00141 | NM_002108          | GRK7        |
| 8083129 | -0,78 | -1,71 | 0,00748 | -1,14 | -2,21 | 0,00576 | NM_139209          | ANKRD30A    |
| 7927033 | -0,78 | -1,71 | 0,01067 | -1,13 | -2,20 | 0,04292 | NM_052997          | KCNN3       |
| 7920552 | -0,78 | -1,71 | 0,01697 | -1,04 | -2,06 | 0,11206 | NM_002249          | RRP12       |
| 7935425 | -0,78 | -1,71 | 0,01687 | 1,73  | 3,32  | 0,00131 | NM_015179          | ECE2        |
| 8084397 | -0,78 | -1,71 | 0,00419 | -0,33 | -1,26 | 0,10088 | NM_014693          | MMP24       |
| 8062123 | -0,78 | -1,71 | 0,00325 | 0,37  | 1,29  | 0,28110 | NM_006690          | COX11       |
| 8117696 | -0,78 | -1,71 | 0,30254 | 1,58  | 2,99  | 0,06565 | NM_004375          | POTEF       |
| 8055153 | -0,78 | -1,71 | 0,12907 | -1,46 | -2,75 | 0,00071 | NM_001099771       | ---         |
| 8104652 | -0,78 | -1,71 | 0,03729 | -0,76 | -1,70 | 0,02620 | ---                | CASP12      |
| 7951363 | -0,78 | -1,71 | 0,03751 | -1,52 | -2,87 | 0,00337 | NR_000035          | AQP7P1      |
| 8161488 | -0,78 | -1,71 | 0,19774 | -2,02 | -4,07 | 0,00488 | NR_002817          | PUSL1       |
| 7896908 | -0,78 | -1,71 | 0,06920 | 0,45  | 1,36  | 0,38943 | NM_153339          | ---         |
| 8037535 | -0,78 | -1,71 | 0,29935 | 0,12  | 1,08  | 0,79679 | ---                | ELAVL2      |
| 8160459 | -0,78 | -1,71 | 0,27566 | -0,99 | -1,99 | 0,02190 | NM_004432          | ---         |
| 8113703 | -0,78 | -1,71 | 0,02821 | -1,77 | -3,41 | 0,00027 | ---                | DOK7        |
| 8093807 | -0,78 | -1,71 | 0,13871 | -1,08 | -2,11 | 0,05655 | NM_173660          | ITGB1BP3    |
| 8024728 | -0,78 | -1,71 | 0,08211 | -1,13 | -2,19 | 0,02986 | NM_170678          | SHARPIN     |
| 8153652 | -0,78 | -1,71 | 0,05922 | 0,10  | 1,07  | 0,84552 | NM_030974          | ---         |
| 7982550 | -0,78 | -1,71 | 0,02308 | -0,57 | -1,49 | 0,00701 | ---                | SLC16A9     |
| 7933750 | -0,78 | -1,71 | 0,02258 | -0,75 | -1,68 | 0,01037 | NM_194298          | ARSI        |
| 8115144 | -0,78 | -1,72 | 0,13271 | -0,72 | -1,65 | 0,13432 | NM_001012301       | DCAF4L1     |
| 8094843 | -0,78 | -1,72 | 0,12014 | -1,02 | -2,03 | 0,00106 | NM_001029955       | MIR9-1      |
| 7921012 | -0,78 | -1,72 | 0,05298 | -0,48 | -1,40 | 0,00041 | NR_029691          | C21orf2     |
| 8069083 | -0,78 | -1,72 | 0,08807 | 0,27  | 1,21  | 0,55684 | AB209578           | ---         |
| 7937971 | -0,78 | -1,72 | 0,17248 | -0,99 | -1,98 | 0,06699 | ---                | PTH         |
| 7946687 | -0,78 | -1,72 | 0,06741 | -0,85 | -1,80 | 0,00267 | NM_000315          | LCK         |
| 7899753 | -0,78 | -1,72 | 0,04507 | -1,17 | -2,26 | 0,00285 | NM_005356          | EFNB3       |
| 8004571 | -0,78 | -1,72 | 0,11983 | -0,10 | -1,07 | 0,78778 | NM_001406          | SEMA3F      |
| 8079896 | -0,78 | -1,72 | 0,03028 | -0,22 | -1,17 | 0,53261 | NM_004186          | BEND2       |
| 8171545 | -0,78 | -1,72 | 0,01558 | -1,76 | -3,38 | 0,00305 | NM_153346          | TBC1D3B     |
| 8019655 | -0,78 | -1,72 | 0,34841 | 1,29  | 2,45  | 0,07507 | NM_001001417       | VCX2        |
| 8171240 | -0,78 | -1,72 | 0,23673 | -1,03 | -2,04 | 0,01085 | NM_016378          | TTY13       |
| 8177282 | -0,78 | -1,72 | 0,14497 | -1,75 | -3,37 | 0,00275 | NR_001537          | LOC440925   |
| 8056730 | -0,78 | -1,72 | 0,03151 | -0,81 | -1,75 | 0,00097 | NR_027433          | ---         |
| 8044572 | -0,78 | -1,72 | 0,25104 | -1,11 | -2,16 | 0,01457 | ---                | ---         |
| 8124634 | -0,78 | -1,72 | 0,02334 | -1,12 | -2,17 | 0,00364 | ---                | OR2T27      |
| 7925759 | -0,78 | -1,72 | 0,10506 | -1,80 | -3,48 | 0,00581 | NM_001001824       | C12orf70    |
| 7954551 | -0,78 | -1,72 | 0,01846 | -0,64 | -1,56 | 0,01065 | NM_001145010       | ---         |
| 8019347 | -0,78 | -1,72 | 0,25016 | -0,99 | -1,98 | 0,01714 | ---                | OR4A5       |

|         |       |       |         |       |       |         |                 |              |
|---------|-------|-------|---------|-------|-------|---------|-----------------|--------------|
| 7948099 | -0,78 | -1,72 | 0,03052 | -1,04 | -2,05 | 0,03329 | NM_001005272    | CDY1         |
| 8177186 | -0,78 | -1,72 | 0,05305 | -1,20 | -2,30 | 0,00898 | NM_170723       | ---          |
| 8115039 | -0,78 | -1,72 | 0,14129 | -1,35 | -2,54 | 0,00093 | ---             | MPO          |
| 8016932 | -0,78 | -1,72 | 0,14440 | -0,48 | -1,39 | 0,02112 | NM_000250       | ---          |
| 8020321 | -0,78 | -1,72 | 0,05093 | -1,45 | -2,74 | 0,01315 | ---             | PLCD4        |
| 8048350 | -0,78 | -1,72 | 0,12870 | -0,56 | -1,48 | 0,03898 | NM_032726       | ETV3L        |
| 7921222 | -0,78 | -1,72 | 0,05964 | -1,35 | -2,55 | 0,00655 | NM_001004341    | FPGS         |
| 8158123 | -0,78 | -1,72 | 0,04252 | 1,15  | 2,21  | 0,09992 | NM_004957       | ---          |
| 8073924 | -0,78 | -1,72 | 0,04274 | -1,51 | -2,85 | 0,00143 | ---             | HLA-DRB4     |
| 8178811 | -0,78 | -1,72 | 0,17985 | 0,99  | 1,99  | 0,00429 | AK293020        | KCNA3        |
| 7918457 | -0,78 | -1,72 | 0,03655 | -1,42 | -2,68 | 0,00232 | NM_002232       | ---          |
| 7915561 | -0,78 | -1,72 | 0,11042 | -1,22 | -2,33 | 0,01011 | ---             | FKSG73       |
| 8001070 | -0,78 | -1,72 | 0,07254 | -1,45 | -2,74 | 0,05193 | NR_027714       | ---          |
| 8165888 | -0,78 | -1,72 | 0,09695 | -0,91 | -1,88 | 0,14527 | ---             | LOC100131112 |
| 8149084 | -0,78 | -1,72 | 0,10470 | -0,59 | -1,51 | 0,00061 | ENST00000438484 | ---          |
| 7933008 | -0,78 | -1,72 | 0,09287 | -0,87 | -1,83 | 0,02916 | ---             | IL27RA       |
| 8026272 | -0,78 | -1,72 | 0,07055 | 1,35  | 2,56  | 0,08104 | NM_004843       | LOC388692    |
| 7898353 | -0,78 | -1,72 | 0,53661 | -1,74 | -3,33 | 0,00303 | NR_027002       | RLN2         |
| 8159977 | -0,78 | -1,72 | 0,11031 | -0,38 | -1,30 | 0,23773 | NM_134441       | ---          |
| 7906751 | -0,78 | -1,72 | 0,00129 | -0,85 | -1,81 | 0,00365 | ---             | VSTM1        |
| 8039109 | -0,78 | -1,72 | 0,12513 | -1,68 | -3,21 | 0,00344 | NM_198481       | ALDH1L1      |
| 8090314 | -0,78 | -1,72 | 0,01074 | -0,89 | -1,85 | 0,02687 | NM_012190       | APOA5        |
| 7951853 | -0,78 | -1,72 | 0,03438 | -1,14 | -2,21 | 0,05704 | NM_052968       | PKD1L1       |
| 8139534 | -0,78 | -1,72 | 0,07278 | -0,95 | -1,93 | 0,00405 | NM_138295       | ---          |
| 8105144 | -0,78 | -1,72 | 0,24682 | -0,29 | -1,22 | 0,35438 | ---             | ---          |
| 8098326 | -0,78 | -1,72 | 0,20364 | -0,85 | -1,80 | 0,04074 | ---             | HEMGN        |
| 8162719 | -0,78 | -1,72 | 0,13409 | -0,68 | -1,60 | 0,05197 | NM_018437       | ---          |
| 7978403 | -0,78 | -1,72 | 0,09231 | -1,37 | -2,58 | 0,00196 | ---             | FAM75A7      |
| 8155383 | -0,78 | -1,72 | 0,12666 | -1,53 | -2,89 | 0,00646 | NM_015667       | IQCA1        |
| 8059878 | -0,78 | -1,72 | 0,15070 | -0,28 | -1,21 | 0,07599 | NM_024726       | ---          |
| 8111885 | -0,78 | -1,72 | 0,18131 | -1,82 | -3,53 | 0,00075 | ---             | TMPRSS7      |
| 8081631 | -0,78 | -1,72 | 0,04829 | -0,83 | -1,78 | 0,00333 | NM_001042575    | CDC20B       |
| 8112053 | -0,78 | -1,72 | 0,02104 | -0,91 | -1,88 | 0,00773 | NM_152623       | MYPOP        |
| 8037728 | -0,78 | -1,72 | 0,04422 | -0,69 | -1,62 | 0,04265 | NM_001012643    | C1orf217     |
| 7908966 | -0,78 | -1,72 | 0,07932 | -1,22 | -2,32 | 0,02128 | BC000988        | ACRC         |
| 8168345 | -0,78 | -1,72 | 0,09275 | -1,60 | -3,03 | 0,00270 | NM_052957       | ---          |
| 8121755 | -0,78 | -1,72 | 0,01561 | -0,58 | -1,49 | 0,13249 | ---             | C1orf135     |
| 7913852 | -0,78 | -1,72 | 0,05824 | 0,27  | 1,20  | 0,21330 | NM_024037       | CT45A1       |
| 8170052 | -0,78 | -1,72 | 0,16792 | -1,73 | -3,32 | 0,00620 | NM_001017417    | FAM183B      |
| 8139163 | -0,78 | -1,72 | 0,14111 | -0,82 | -1,77 | 0,00216 | NR_028347       | ---          |
| 7996391 | -0,78 | -1,72 | 0,08157 | -1,22 | -2,33 | 0,00021 | ---             | FAM27A       |
| 8161503 | -0,78 | -1,72 | 0,43937 | -2,01 | -4,02 | 0,00860 | NR_024060       | MHIP         |
| 7897849 | -0,78 | -1,72 | 0,13051 | 0,42  | 1,34  | 0,21385 | NM_021933       | ---          |
| 8102936 | -0,78 | -1,72 | 0,28634 | -2,26 | -4,78 | 0,01489 | ---             | ---          |
| 8167951 | -0,78 | -1,72 | 0,17772 | -2,03 | -4,08 | 0,00008 | ---             | LOC391742    |
| 8104615 | -0,78 | -1,72 | 0,53620 | -1,40 | -2,65 | 0,00040 | ENST00000330110 | ADCY1        |
| 8132667 | -0,78 | -1,72 | 0,05136 | 0,82  | 1,77  | 0,03220 | NM_021116       | ---          |
| 7897368 | -0,78 | -1,72 | 0,01381 | -1,06 | -2,09 | 0,02289 | ---             | SILV         |
| 7963970 | -0,78 | -1,72 | 0,09091 | -0,58 | -1,49 | 0,27589 | NM_006928       | ---          |
| 7926443 | -0,78 | -1,72 | 0,10269 | -0,66 | -1,58 | 0,04887 | ---             | IGHMBP2      |
| 7942073 | -0,78 | -1,72 | 0,09714 | 0,52  | 1,44  | 0,08868 | NM_002180       | LIPF         |
| 7928982 | -0,78 | -1,72 | 0,00030 | -0,73 | -1,66 | 0,00442 | NM_004190       | ---          |
| 7966068 | -0,78 | -1,72 | 0,18694 | -1,94 | -3,85 | 0,00101 | ---             | GEMIN7       |
| 8029617 | -0,78 | -1,72 | 0,05601 | 1,01  | 2,02  | 0,03912 | NM_024707       | KLRD1        |
| 7953949 | -0,78 | -1,72 | 0,02867 | -0,59 | -1,51 | 0,00222 | NM_002262       | CDK2AP2      |
| 7949836 | -0,78 | -1,72 | 0,01941 | 0,00  | 1,00  | 0,98925 | NM_005851       | EEF1A1       |
| 8127544 | -0,78 | -1,72 | 0,17353 | -0,09 | -1,06 | 0,18968 | NM_001402       | ---          |
| 8134347 | -0,78 | -1,72 | 0,09133 | -1,63 | -3,09 | 0,00266 | ---             | MGC10814     |
| 8035551 | -0,78 | -1,72 | 0,08557 | -1,44 | -2,72 | 0,05095 | BC004943        | ABCB8        |
| 8137332 | -0,78 | -1,72 | 0,18393 | -0,57 | -1,49 | 0,29476 | NM_007188       | FAM81B       |
| 8106950 | -0,78 | -1,72 | 0,00485 | -1,32 | -2,50 | 0,04879 | NM_152548       | RHBDF2       |
| 8018731 | -0,78 | -1,72 | 0,10505 | 1,45  | 2,73  | 0,05160 | NM_024599       | CYP2E1       |
| 7931643 | -0,78 | -1,72 | 0,00692 | -0,10 | -1,07 | 0,54801 | NM_000773       | LOC100129455 |
| 8056963 | -0,78 | -1,72 | 0,23848 | -1,24 | -2,36 | 0,00322 | ENST00000313266 | ---          |
| 8020451 | -0,78 | -1,72 | 0,21584 | -0,79 | -1,73 | 0,00046 | ---             | KCNJ16       |
| 8009493 | -0,78 | -1,72 | 0,11577 | -1,08 | -2,11 | 0,03982 | NM_170742       | FAM75A7      |
| 8155371 | -0,78 | -1,72 | 0,12960 | -1,52 | -2,87 | 0,00718 | NM_015667       | TRIM10       |
| 8124716 | -0,78 | -1,72 | 0,02570 | -1,21 | -2,31 | 0,04335 | NM_006778       | TRIM10       |
| 8179628 | -0,78 | -1,72 | 0,02570 | -1,21 | -2,31 | 0,04335 | NM_006778       | KRTAP3-2     |
| 8015169 | -0,78 | -1,72 | 0,03275 | -0,89 | -1,85 | 0,00941 | NM_031959       | KRTAP3-2     |
| 8019597 | -0,78 | -1,72 | 0,03275 | -0,89 | -1,85 | 0,00941 | NM_031959       | C1orf162     |
| 7903980 | -0,78 | -1,72 | 0,30656 | -0,73 | -1,66 | 0,05834 | NM_174896       | MIR204       |
| 8161695 | -0,78 | -1,72 | 0,18270 | -1,53 | -2,89 | 0,00020 | NR_029621       | SLC24A6      |

|           |       |       |         |       |       |         |                                  |                      |
|-----------|-------|-------|---------|-------|-------|---------|----------------------------------|----------------------|
| 7966600   | -0,78 | -1,72 | 0,01937 | 0,31  | 1,24  | 0,57264 | NM_024959                        | ---                  |
| 8155896   | -0,78 | -1,72 | 0,06679 | -1,32 | -2,49 | 0,04526 | ---                              | TBX15                |
| 7919028   | -0,78 | -1,72 | 0,00441 | -0,57 | -1,48 | 0,11871 | NM_152380                        | ---                  |
| 7945418   | -0,78 | -1,72 | 0,14775 | -0,07 | -1,05 | 0,84395 | ---                              | SOLH                 |
| 7991877   | -0,78 | -1,72 | 0,01156 | -0,09 | -1,06 | 0,81051 | NM_005632                        | ---                  |
| 8105799   | -0,78 | -1,72 | 0,16960 | -0,86 | -1,82 | 0,01294 | ---                              | ---                  |
| 7983379   | -0,78 | -1,72 | 0,17738 | -1,43 | -2,69 | 0,00803 | ---                              | ANKZF1               |
| 8048489   | -0,78 | -1,72 | 0,05173 | 0,69  | 1,61  | 0,07825 | NM_018089                        | FABP12               |
| 8151542   | -0,78 | -1,72 | 0,12434 | -1,51 | -2,85 | 0,00100 | NM_001105281                     | KCNK17               |
| 8126163   | -0,78 | -1,72 | 0,04886 | -1,30 | -2,46 | 0,00206 | NM_031460                        | KRTAP20-2            |
| 8068161   | -0,78 | -1,72 | 0,10949 | -0,80 | -1,74 | 0,02709 | NM_181616                        | SYCP2                |
| 8067305   | -0,78 | -1,72 | 0,02140 | -0,63 | -1,55 | 0,01037 | NM_014258                        | ---                  |
| 8149269   | -0,79 | -1,72 | 0,00141 | -1,47 | -2,76 | 0,06276 | ---                              | MIR412               |
| 7976854   | -0,79 | -1,72 | 0,08738 | -1,64 | -3,11 | 0,00716 | NR_030155                        | ---                  |
| 8007603   | -0,79 | -1,72 | 0,03177 | -0,37 | -1,29 | 0,18486 | ---                              | PKD1L2               |
| 8003007   | -0,79 | -1,72 | 0,00103 | -0,55 | -1,46 | 0,00169 | NM_052892                        | CCDC88C              |
| 7980828   | -0,79 | -1,72 | 0,08241 | 2,83  | 7,09  | 0,01531 | NM_001080414                     | ---                  |
| 8160784   | -0,79 | -1,72 | 0,23717 | -1,25 | -2,37 | 0,01080 | ---                              | ---                  |
| 8035901   | -0,79 | -1,72 | 0,09808 | -0,60 | -1,51 | 0,01466 | ---                              | ---                  |
| 7905054   | -0,79 | -1,72 | 0,00147 | -1,20 | -2,30 | 0,02031 | ---                              | ---                  |
| 7910583   | -0,79 | -1,72 | 0,01505 | -1,08 | -2,12 | 0,00120 | ---                              | DPYSL5               |
| 8040725   | -0,79 | -1,72 | 0,00985 | 0,41  | 1,32  | 0,13425 | NM_020134                        | ---                  |
| 8117707   | -0,79 | -1,72 | 0,09332 | -1,45 | -2,73 | 0,01012 | ---                              | FBN3                 |
| 8033487   | -0,79 | -1,72 | 0,02238 | -0,85 | -1,81 | 0,02417 | NM_032447                        | BTG4                 |
| 7951604   | -0,79 | -1,72 | 0,00450 | -0,83 | -1,78 | 0,06135 | NM_017589                        | ORM2                 |
| 8157450   | -0,79 | -1,72 | 0,06147 | -1,32 | -2,50 | 0,09433 | NM_000608                        | RASGEF1B             |
| 8101304   | -0,79 | -1,72 | 0,03784 | -0,82 | -1,77 | 0,00427 | NM_152545                        | SNORD114-6           |
| 7976818   | -0,79 | -1,72 | 0,02446 | -1,31 | -2,49 | 0,01183 | NR_003198                        | ---                  |
| 7956739   | -0,79 | -1,72 | 0,00053 | -0,91 | -1,87 | 0,00140 | ---                              | ---                  |
| 8129313   | -0,79 | -1,72 | 0,01864 | -0,86 | -1,82 | 0,06104 | ---                              | LOC57399             |
| 8112306   | -0,79 | -1,72 | 0,00291 | -1,04 | -2,06 | 0,00599 | AF264626                         | RLN3                 |
| 8026265   | -0,79 | -1,72 | 0,10994 | -0,40 | -1,32 | 0,13786 | NM_080864                        | SPAG17               |
| 7918973   | -0,79 | -1,72 | 0,00135 | -0,75 | -1,69 | 0,01202 | NM_206996                        | ---                  |
| 8176665   | -0,79 | -1,72 | 0,25268 | -1,82 | -3,54 | 0,00207 | ---                              | ---                  |
| 8177193   | -0,79 | -1,72 | 0,25268 | -1,82 | -3,54 | 0,00207 | ---                              | IL2ORB               |
| 8082916   | -0,79 | -1,72 | 0,05000 | 2,90  | 7,47  | 0,00041 | NM_144717                        | ---                  |
| 7956399   | -0,79 | -1,72 | 0,03106 | -0,85 | -1,80 | 0,00233 | ---                              | SLC39A3              |
| 8032525   | -0,79 | -1,72 | 0,10009 | 0,89  | 1,85  | 0,06481 | NM_213568                        | ---                  |
| 8172193   | -0,79 | -1,72 | 0,06299 | -0,69 | -1,61 | 0,04676 | ---                              | PLEK2                |
| 7979710   | -0,79 | -1,73 | 0,06063 | 3,51  | 11,36 | 0,00061 | NM_016445                        | GGTA1                |
| 8163908   | -0,79 | -1,73 | 0,04804 | -1,03 | -2,05 | 0,00495 | NR_003191                        | MMP20                |
| 7951224   | -0,79 | -1,73 | 0,06410 | -1,14 | -2,21 | 0,02520 | NM_004771                        | ---                  |
| 8175418   | -0,79 | -1,73 | 0,01435 | -0,61 | -1,53 | 0,00993 | ---                              | OR6V1                |
| 8136837   | -0,79 | -1,73 | 0,17091 | -1,22 | -2,32 | 0,01309 | NM_001001667                     | KCNN2                |
| 8107408   | -0,79 | -1,73 | 0,10827 | -1,22 | -2,33 | 0,00018 | NM_021614                        | FAM27E3              |
| 8161499   | -0,79 | -1,73 | 0,23965 | 0,91  | 1,88  | 0,00059 | BC032035                         | TBC1D17              |
| 8030539   | -0,79 | -1,73 | 0,05561 | -0,06 | -1,04 | 0,90939 | NM_024682                        | EPB41L4B             |
| 8163116   | -0,79 | -1,73 | 0,03024 | 3,47  | 11,08 | 0,00012 | NM_019114                        | OR5H1                |
| 8081194   | -0,79 | -1,73 | 0,07724 | -0,83 | -1,78 | 0,00123 | NM_001005338                     | SLC6A12              |
| 7960177   | -0,79 | -1,73 | 0,03249 | -0,97 | -1,96 | 0,01498 | NM_003044                        | FOXF2                |
| 8116582   | -0,79 | -1,73 | 0,12699 | -2,08 | -4,24 | 0,00037 | NM_001452                        | CLDN20               |
| 8122966   | -0,79 | -1,73 | 0,01980 | -0,69 | -1,61 | 0,08333 | NM_001001346                     | GPCRLTM7             |
| 7986536   | -0,79 | -1,73 | 0,13501 | -1,04 | -2,06 | 0,02591 | AY792621                         | C8orf8               |
| 8149318   | -0,79 | -1,73 | 0,01737 | -1,11 | -2,15 | 0,00043 | ENST00000443854                  | ---                  |
| 8084943   | -0,79 | -1,73 | 0,01434 | -1,52 | -2,86 | 0,01920 | ---                              | NXF2B                |
| 8174149   | -0,79 | -1,73 | 0,06556 | -0,56 | -1,48 | 0,02150 | NM_001099686                     | LOC100128374         |
| 8131098   | -0,79 | -1,73 | 0,16177 | -1,28 | -2,43 | 0,03578 | ENST00000402221                  | TTC29                |
| 8103064   | -0,79 | -1,73 | 0,03233 | -0,69 | -1,61 | 0,23335 | NM_031956                        | OXGR1                |
| 7972428   | -0,79 | -1,73 | 0,08882 | -1,31 | -2,49 | 0,00743 | NM_080818                        | ---                  |
| 8044698   | -0,79 | -1,73 | 0,09357 | -0,86 | -1,82 | 0,00293 | ---                              | GGT1 // GGT1 // GGT1 |
| 8074569   | -0,79 | -1,73 | 0,16716 | -1,60 | -3,02 | 0,01802 | BC128239 // BC128239 // BC128239 |                      |
| POM121L1P |       |       |         |       |       |         |                                  |                      |
| 8074714   | -0,79 | -1,73 | 0,33265 | -2,16 | -4,46 | 0,00019 | NR_024591                        | C1orf223             |
| 7901253   | -0,79 | -1,73 | 0,13340 | -0,64 | -1,56 | 0,12287 | BC144026                         | TERC                 |
| 8092000   | -0,79 | -1,73 | 0,03121 | -0,87 | -1,83 | 0,08113 | NR_001566                        | FGF17                |
| 8144995   | -0,79 | -1,73 | 0,04987 | -1,12 | -2,17 | 0,04385 | NM_003867                        | LOC100131170         |
| 8019088   | -0,79 | -1,73 | 0,06056 | -0,05 | -1,04 | 0,56592 | AK096606                         | ---                  |
| 8145609   | -0,79 | -1,73 | 0,03794 | -0,85 | -1,80 | 0,02446 | ---                              | NRXN2                |
| 7949080   | -0,79 | -1,73 | 0,20200 | -0,99 | -1,99 | 0,14565 | NM_015080                        | WFDC10B              |
| 8066574   | -0,79 | -1,73 | 0,25409 | -0,39 | -1,31 | 0,13009 | NM_172006                        | TCL6                 |
| 7976523   | -0,79 | -1,73 | 0,03999 | -1,49 | -2,82 | 0,02753 | ENST00000332130                  | KRT15                |
| 8015337   | -0,79 | -1,73 | 0,14539 | -0,58 | -1,50 | 0,01054 | NM_002275                        | SLC25A11             |
| 8011747   | -0,79 | -1,73 | 0,02363 | 1,13  | 2,19  | 0,10864 | NM_003562                        | ---                  |

|         |       |       |         |       |        |         |                 |              |  |
|---------|-------|-------|---------|-------|--------|---------|-----------------|--------------|--|
| 8079368 | -0,79 | -1,73 | 0,00155 | -0,45 | -1,36  | 0,22045 | ---             | SELL         |  |
| 7922219 | -0,79 | -1,73 | 0,00251 | -0,81 | -1,75  | 0,02267 | NM_000655       | ---          |  |
| 8097749 | -0,79 | -1,73 | 0,17604 | -1,73 | -3,32  | 0,00763 | ---             | ---          |  |
| 8114581 | -0,79 | -1,73 | 0,11096 | -0,66 | -1,58  | 0,00007 | ---             | KIAA0284     |  |
| 7977299 | -0,79 | -1,73 | 0,06657 | 0,54  | 1,46   | 0,33099 | NM_001112726    | MBD3L2       |  |
| 8025129 | -0,79 | -1,73 | 0,23664 | -1,84 | -3,58  | 0,00040 | NM_144614       | C16orf93     |  |
| 8000932 | -0,79 | -1,73 | 0,02729 | -0,80 | -1,74  | 0,08028 | NM_001014979    | KIF25        |  |
| 8123437 | -0,79 | -1,73 | 0,15089 | -0,82 | -1,77  | 0,24422 | NM_030615       | ---          |  |
| 7918911 | -0,79 | -1,73 | 0,06425 | -0,73 | -1,66  | 0,02012 | ---             | HSPBP1       |  |
| 8039440 | -0,79 | -1,73 | 0,30374 | 0,23  | 1,18   | 0,68808 | NM_012267       | LOC100288105 |  |
| 8114645 | -0,79 | -1,73 | 0,25218 | 0,17  | 1,12   | 0,29294 | ENST00000319589 | ASGR1        |  |
| 8012043 | -0,79 | -1,73 | 0,06221 | -1,30 | -2,46  | 0,02931 | NM_001671       | SPACA3       |  |
| 8006423 | -0,79 | -1,73 | 0,22812 | -0,95 | -1,93  | 0,05248 | NM_173847       | ---          |  |
| 7941863 | -0,79 | -1,73 | 0,06140 | -1,11 | -2,16  | 0,00473 | ---             | FAM46D       |  |
| 8168546 | -0,79 | -1,73 | 0,04057 | -0,79 | -1,73  | 0,00070 | NM_001170574    | CLEC18B      |  |
| 8002713 | -0,79 | -1,73 | 0,15790 | -1,27 | -2,41  | 0,03662 | NM_001011880    | HES5         |  |
| 7911750 | -0,79 | -1,73 | 0,09334 | -1,53 | -2,89  | 0,04709 | NM_001010926    | TSPAN1       |  |
| 7901175 | -0,79 | -1,73 | 0,05741 | 3,42  | 10,71  | 0,00015 | NM_005727       | GDF6         |  |
| 8151906 | -0,79 | -1,73 | 0,22132 | -1,39 | -2,63  | 0,00277 | NM_001001557    | ---          |  |
| 7967418 | -0,79 | -1,73 | 0,00999 | -0,56 | -1,47  | 0,01158 | ---             | NEUROG3      |  |
| 7934083 | -0,79 | -1,73 | 0,20817 | -1,88 | -3,69  | 0,03438 | NM_020999       | ABCD1        |  |
| 8170704 | -0,79 | -1,73 | 0,05381 | 0,56  | 1,47   | 0,47791 | NM_000033       | KRI1         |  |
| 8034055 | -0,79 | -1,73 | 0,12810 | 0,34  | 1,27   | 0,43425 | NM_023008       | RAB3D        |  |
| 8034202 | -0,79 | -1,73 | 0,07184 | 1,00  | 2,00   | 0,03530 | NM_004283       | OR5H15       |  |
| 8081198 | -0,79 | -1,73 | 0,07736 | -0,94 | -1,92  | 0,00170 | NM_001005515    | OR888        |  |
| 7952404 | -0,79 | -1,73 | 0,44995 | -1,90 | -3,74  | 0,00001 | NM_012378       | MAFG         |  |
| 8019308 | -0,79 | -1,73 | 0,02089 | 1,16  | 2,23   | 0,02150 | NM_032711       | ---          |  |
| 7978704 | -0,79 | -1,73 | 0,01117 | -1,33 | -2,51  | 0,02054 | ---             | LOC494127    |  |
| 8162187 | -0,79 | -1,73 | 0,04967 | -0,97 | -1,96  | 0,00056 | BC068978        | ---          |  |
| 8022007 | -0,79 | -1,73 | 0,17886 | -1,89 | -3,70  | 0,00767 | ---             | VCX          |  |
| 8165881 | -0,79 | -1,73 | 0,27995 | -0,93 | -1,90  | 0,00298 | NM_013452       | CETN3        |  |
| 8113050 | -0,79 | -1,73 | 0,19598 | -0,38 | -1,30  | 0,17869 | NM_004365       | FAM84A       |  |
| 8040374 | -0,79 | -1,73 | 0,19082 | -1,40 | -2,63  | 0,02722 | NM_145175       | ZNF584       |  |
| 8031939 | -0,79 | -1,73 | 0,18778 | 0,81  | 1,75   | 0,14447 | NM_173548       | ---          |  |
| 8079613 | -0,79 | -1,73 | 0,13590 | -1,01 | -2,01  | 0,00044 | ---             | MIR455       |  |
| 8157444 | -0,79 | -1,73 | 0,09189 | -0,92 | -1,90  | 0,02076 | NR_030255       | ---          |  |
| 8146559 | -0,79 | -1,73 | 0,03286 | -1,24 | -2,37  | 0,08900 | ---             | ---          |  |
| 8157139 | -0,79 | -1,73 | 0,28531 | -0,06 | -1,04  | 0,84711 | ---             | LYG1         |  |
| 8054209 | -0,79 | -1,73 | 0,17112 | -0,64 | -1,56  | 0,09845 | NM_174898       | FAM156A      |  |
| 8167749 | -0,79 | -1,73 | 0,11004 | 1,47  | 2,77   | 0,00632 | NM_014138       | ---          |  |
| 8042221 | -0,79 | -1,73 | 0,32341 | -1,29 | -2,44  | 0,02180 | ---             | RYR2         |  |
| 7910792 | -0,79 | -1,73 | 0,02610 | -0,64 | -1,56  | 0,00441 | NM_001035       | ---          |  |
| 8005685 | -0,79 | -1,73 | 0,03877 | -1,42 | -2,67  | 0,04316 | ---             | GPR152       |  |
| 7949796 | -0,79 | -1,73 | 0,11584 | -1,73 | -3,33  | 0,01356 | NM_206997       | ATP6V1E2     |  |
| 8051989 | -0,79 | -1,73 | 0,13795 | 0,35  | 1,27   | 0,26455 | NM_080653       | ---          |  |
| 7925703 | -0,79 | -1,73 | 0,20193 | -1,06 | -2,08  | 0,00307 | ---             | ---          |  |
| 8149345 | -0,79 | -1,73 | 0,59325 | -3,87 | -14,64 | 0,00004 | ---             | ---          |  |
| 8097124 | -0,79 | -1,73 | 0,08682 | -1,50 | -2,84  | 0,01106 | ---             | RNF213       |  |
| 8019071 | -0,79 | -1,73 | 0,00935 | -0,54 | -1,45  | 0,03878 | NM_020914       | CD164L2      |  |
| 7914084 | -0,79 | -1,73 | 0,26227 | 0,93  | 1,91   | 0,03350 | NM_207397       | SLC44A5      |  |
| 7917052 | -0,79 | -1,73 | 0,02004 | -0,55 | -1,46  | 0,16724 | NM_152697       | FLJ45974     |  |
| 8139699 | -0,79 | -1,73 | 0,00660 | -1,01 | -2,01  | 0,04975 | AK127870        | C14orf4      |  |
| 7980338 | -0,79 | -1,73 | 0,26473 | 1,30  | 2,47   | 0,08103 | NM_024496       | ---          |  |
| 8064864 | -0,79 | -1,73 | 0,07909 | -0,53 | -1,44  | 0,14690 | ---             | FLJ45340     |  |
| 7945344 | -0,79 | -1,73 | 0,34768 | -2,21 | -4,63  | 0,01657 | NR_024368       | GPD1         |  |
| 7955348 | -0,79 | -1,73 | 0,25868 | -1,15 | -2,22  | 0,00740 | NM_005276       | ---          |  |
| 8136289 | -0,79 | -1,73 | 0,18999 | -0,80 | -1,74  | 0,09465 | ---             | FAM75A7      |  |
| 8161471 | -0,79 | -1,73 | 0,13158 | -1,57 | -2,96  | 0,00680 | NM_015667       | RFESD        |  |
| 8106978 | -0,79 | -1,73 | 0,33960 | -0,62 | -1,54  | 0,13597 | NM_001131065    | KRTAP10-8    |  |
| 8069148 | -0,79 | -1,73 | 0,16267 | -1,72 | -3,30  | 0,00007 | NM_198695       | ---          |  |
| 7959078 | -0,79 | -1,73 | 0,21517 | 0,76  | 1,69   | 0,29482 | ---             | ---          |  |
| 7970426 | -0,79 | -1,73 | 0,13146 | -1,55 | -2,92  | 0,00235 | ---             | TLX1         |  |
| 7929947 | -0,79 | -1,73 | 0,08249 | -0,66 | -1,58  | 0,09349 | NM_005521       | CCR4         |  |
| 8078442 | -0,79 | -1,73 | 0,07748 | -1,25 | -2,38  | 0,03586 | NM_005508       | SUSD2        |  |
| 8071861 | -0,79 | -1,73 | 0,08482 | 2,02  | 4,06   | 0,01218 | NM_019601       | ---          |  |
| 7919024 | -0,79 | -1,73 | 0,24477 | -0,95 | -1,93  | 0,00118 | ---             | LOC100127980 |  |
| 8036302 | -0,79 | -1,73 | 0,08867 | 0,17  | 1,13   | 0,69847 | AK090827        | ---          |  |
| 7948141 | -0,80 | -1,74 | 0,08508 | -1,13 | -2,19  | 0,02050 | ---             | ---          |  |
| 8146118 | -0,80 | -1,74 | 0,13643 | -0,98 | -1,97  | 0,04191 | ---             | ---          |  |
| 7997164 | -0,80 | -1,74 | 0,17435 | -1,02 | -2,02  | 0,05830 | ---             | ---          |  |
| 7916781 | -0,80 | -1,74 | 0,21400 | -1,41 | -2,65  | 0,01930 | ---             | MYO3A        |  |
| 7926728 | -0,80 | -1,74 | 0,00693 | 1,93  | 3,82   | 0,01006 | NM_017433       | ---          |  |
| 8102728 | -0,80 | -1,74 | 0,02226 | 0,11  | 1,08   | 0,39338 | ---             | PCDHAC1      |  |



|         |       |       |         |       |       |         |                 |              |
|---------|-------|-------|---------|-------|-------|---------|-----------------|--------------|
| 8108633 | -0,80 | -1,74 | 0,01106 | -0,47 | -1,38 | 0,13485 | NM_018898       | CNTD1        |
| 8007388 | -0,80 | -1,74 | 0,06277 | -1,10 | -2,14 | 0,16847 | NM_173478       | C6orf103     |
| 8122561 | -0,80 | -1,74 | 0,04468 | -0,96 | -1,95 | 0,00431 | NM_024694       | ---          |
| 8121138 | -0,80 | -1,74 | 0,06676 | -1,25 | -2,39 | 0,05581 | --- ATP1A3      | ---          |
| 8037079 | -0,80 | -1,74 | 0,19468 | 1,83  | 3,56  | 0,01095 | NM_152296       | ---          |
| 8115395 | -0,80 | -1,74 | 0,00641 | -1,54 | -2,90 | 0,02152 | ---             | ---          |
| 7991184 | -0,80 | -1,74 | 0,00182 | -0,55 | -1,47 | 0,01838 | --- ZFXH2       | ---          |
| 7978056 | -0,80 | -1,74 | 0,01703 | -0,08 | -1,05 | 0,54344 | BC144336 C4BPB  | ---          |
| 7909306 | -0,80 | -1,74 | 0,16268 | -1,48 | -2,80 | 0,01379 | NM_000716       | TSEN34       |
| 8031145 | -0,80 | -1,74 | 0,19002 | -0,02 | -1,02 | 0,96585 | NM_024075       | ---          |
| 7965484 | -0,80 | -1,74 | 0,02943 | -1,18 | -2,26 | 0,00141 | --- ITM2A       | ---          |
| 8173755 | -0,80 | -1,74 | 0,13654 | -0,75 | -1,68 | 0,00181 | NM_004867       | CLIC5        |
| 8126729 | -0,80 | -1,74 | 0,02291 | -1,09 | -2,13 | 0,00037 | NM_001114086    | ACCS         |
| 7939507 | -0,80 | -1,74 | 0,18388 | -0,17 | -1,13 | 0,57753 | NM_032592       | MIR127       |
| 7976804 | -0,80 | -1,74 | 0,02569 | -0,45 | -1,37 | 0,18439 | NR_029696       | TBX6         |
| 8000779 | -0,80 | -1,74 | 0,05456 | -0,43 | -1,34 | 0,15550 | NM_004608       | MS4A2        |
| 7940226 | -0,80 | -1,74 | 0,13005 | -0,81 | -1,75 | 0,00536 | NM_000139       | OR8U1        |
| 7939983 | -0,80 | -1,74 | 0,09520 | -0,78 | -1,72 | 0,00486 | NM_001005204    | LOC441795    |
| 8007310 | -0,80 | -1,74 | 0,04349 | -1,23 | -2,35 | 0,00876 | ENST00000447408 | FLJ46300     |
| 7937073 | -0,80 | -1,74 | 0,08397 | -1,59 | -3,02 | 0,00153 | ENST00000341866 | ---          |
| 7907700 | -0,80 | -1,74 | 0,22844 | -1,21 | -2,31 | 0,03925 | ---             | ---          |
| 8157189 | -0,80 | -1,74 | 0,12018 | -0,24 | -1,18 | 0,32503 | --- OR56A5      | ---          |
| 7946113 | -0,80 | -1,74 | 0,03093 | -0,92 | -1,90 | 0,00035 | NM_001146033    | KCNV1        |
| 8152369 | -0,80 | -1,74 | 0,05600 | -1,33 | -2,52 | 0,00919 | NM_014379       | ---          |
| 8120462 | -0,80 | -1,74 | 0,12894 | -0,76 | -1,70 | 0,00560 | --- FOXR2       | ---          |
| 8167895 | -0,80 | -1,74 | 0,00464 | -0,64 | -1,55 | 0,00901 | NM_198451       | LOC100128501 |
| 8158542 | -0,80 | -1,74 | 0,23576 | -1,95 | -3,86 | 0,00015 | AK092192 ---    | ---          |
| 8099924 | -0,80 | -1,74 | 0,26627 | -1,15 | -2,21 | 0,05384 | --- ANKLE1      | ---          |
| 8026712 | -0,80 | -1,74 | 0,00057 | -0,51 | -1,42 | 0,26404 | NM_152363       | ---          |
| 8045134 | -0,80 | -1,74 | 0,00037 | -1,25 | -2,39 | 0,01658 | --- CCDC157     | ---          |
| 8072316 | -0,80 | -1,74 | 0,17726 | -0,89 | -1,85 | 0,06887 | NM_001017437    | CLCNKA       |
| 7898300 | -0,80 | -1,74 | 0,06959 | -0,10 | -1,07 | 0,65250 | NM_004070       | DNAJC22      |
| 7955211 | -0,80 | -1,74 | 0,04067 | -0,30 | -1,23 | 0,31543 | NM_024902       | TTY12        |
| 8176471 | -0,80 | -1,74 | 0,07549 | -0,83 | -1,78 | 0,00277 | NR_001551       | SNORD109A    |
| 7981947 | -0,80 | -1,74 | 0,12484 | -0,05 | -1,04 | 0,70648 | NR_001295       | SNORD109A    |
| 7982098 | -0,80 | -1,74 | 0,12484 | -0,05 | -1,04 | 0,70648 | NR_001295       | C9orf153     |
| 8162132 | -0,80 | -1,74 | 0,00356 | -0,77 | -1,71 | 0,00991 | BC108665 ---    | ---          |
| 7989243 | -0,80 | -1,74 | 0,01364 | -0,86 | -1,81 | 0,00250 | ---             | ---          |
| 8127532 | -0,80 | -1,74 | 0,20460 | -1,90 | -3,74 | 0,00370 | ---             | ---          |
| 7971415 | -0,80 | -1,74 | 0,02327 | -0,55 | -1,47 | 0,04275 | --- KPRP        | ---          |
| 7905515 | -0,80 | -1,74 | 0,03444 | -1,79 | -3,45 | 0,01820 | NM_001025231    | UBQLN3       |
| 7946078 | -0,80 | -1,74 | 0,20160 | -0,90 | -1,87 | 0,04083 | NM_017481       | ---          |
| 8127997 | -0,80 | -1,74 | 0,09945 | -0,49 | -1,41 | 0,00337 | --- HP          | ---          |
| 7997188 | -0,80 | -1,74 | 0,36691 | -1,19 | -2,29 | 0,12178 | NM_005143       | KRT17        |
| 8013042 | -0,80 | -1,74 | 0,11050 | -1,53 | -2,89 | 0,01305 | NM_000422       | PRKAR1B      |
| 8137675 | -0,80 | -1,74 | 0,11670 | -0,57 | -1,48 | 0,18158 | NM_002735       | GOLGA6L9     |
| 7985409 | -0,80 | -1,74 | 0,41858 | -0,06 | -1,05 | 0,91497 | NM_198181       | GOLGA6L9     |
| 7985450 | -0,80 | -1,74 | 0,41858 | -0,06 | -1,05 | 0,91497 | NM_198181       | MMP11        |
| 8071758 | -0,80 | -1,74 | 0,21520 | -0,01 | -1,01 | 0,97391 | NM_005940       | RP9P         |
| 8138930 | -0,80 | -1,74 | 0,05753 | 0,16  | 1,12  | 0,18975 | NR_003500       | EPB41L4A     |
| 8113512 | -0,80 | -1,74 | 0,00033 | 0,47  | 1,39  | 0,22951 | NM_022140       | ZNF606       |
| 8031843 | -0,80 | -1,74 | 0,15067 | -0,92 | -1,89 | 0,01973 | NM_025027       | ---          |
| 7965038 | -0,80 | -1,74 | 0,30920 | -1,59 | -3,02 | 0,02016 | --- SYNGR3      | ---          |
| 7992447 | -0,80 | -1,74 | 0,11172 | 0,04  | 1,03  | 0,88590 | NM_004209       | EMR2         |
| 8034873 | -0,80 | -1,74 | 0,00500 | 0,72  | 1,65  | 0,02926 | NM_013447       | ---          |
| 7981779 | -0,80 | -1,74 | 0,33418 | -0,97 | -1,95 | 0,06170 | --- MIR106B     | ---          |
| 8141423 | -0,80 | -1,74 | 0,20927 | -0,94 | -1,91 | 0,02201 | NR_029831       | RGS6         |
| 7975482 | -0,80 | -1,74 | 0,15786 | 0,79  | 1,73  | 0,16766 | NM_004296       | SHROOM1      |
| 8114068 | -0,80 | -1,74 | 0,22960 | -1,21 | -2,32 | 0,01504 | NM_133456       | PLA2G16      |
| 7948987 | -0,80 | -1,74 | 0,07731 | -0,24 | -1,18 | 0,37518 | NM_007069       | ---          |
| 8123060 | -0,80 | -1,74 | 0,01601 | -0,95 | -1,93 | 0,00627 | ---             | F5           |
| 7922174 | -0,80 | -1,74 | 0,05518 | -1,18 | -2,27 | 0,00043 | NM_000130       | PROCA1       |
| 8013747 | -0,80 | -1,74 | 0,11810 | -0,76 | -1,69 | 0,08777 | NM_152465       | IP6K3        |
| 8125780 | -0,80 | -1,74 | 0,01040 | -0,97 | -1,96 | 0,14300 | NM_054111       | ---          |
| 8093451 | -0,80 | -1,74 | 0,30610 | -0,20 | -1,15 | 0,76474 | --- ZACN        | ---          |
| 8010036 | -0,80 | -1,74 | 0,07830 | -1,16 | -2,24 | 0,02226 | NM_180990       | ITGB7        |
| 7963614 | -0,80 | -1,74 | 0,08528 | -1,48 | -2,79 | 0,00012 | NM_000889       | SRC          |
| 8062377 | -0,80 | -1,74 | 0,03807 | -0,11 | -1,08 | 0,78427 | NM_005417       | MIR99B       |
| 8030842 | -0,80 | -1,74 | 0,03209 | -1,24 | -2,37 | 0,11202 | NR_029843       | SNORD115-33  |
| 7982072 | -0,80 | -1,74 | 0,02541 | -1,31 | -2,47 | 0,00116 | NR_003348       | POM121L1P    |
| 8071530 | -0,80 | -1,74 | 0,38626 | -1,01 | -2,02 | 0,33263 | NR_024591       | POM121L1P    |
| 8074712 | -0,80 | -1,74 | 0,38626 | -1,01 | -2,02 | 0,33263 | NR_024591       | ---          |
| 7910674 | -0,80 | -1,74 | 0,10200 | -1,33 | -2,51 | 0,03218 | --- CDHR3       | ---          |

|         |       |       |         |       |       |         |                    |              |
|---------|-------|-------|---------|-------|-------|---------|--------------------|--------------|
| 8135341 | -0,80 | -1,74 | 0,04253 | -1,13 | -2,19 | 0,01588 | NM_152750          | LOH3CR2A     |
| 8077499 | -0,80 | -1,74 | 0,02311 | -0,56 | -1,47 | 0,08014 | AF086709 KCNG1     |              |
| 8067029 | -0,80 | -1,74 | 0,03855 | -0,45 | -1,37 | 0,49161 | NM_002237          | TTYH2        |
| 8009568 | -0,80 | -1,74 | 0,13136 | 2,39  | 5,24  | 0,00498 | NM_032646          | ANGPT2       |
| 8149071 | -0,80 | -1,74 | 0,04436 | -1,07 | -2,09 | 0,00815 | NM_001147          | GOLGA8F      |
| 7991668 | -0,80 | -1,74 | 0,14576 | -0,61 | -1,52 | 0,25358 | NR_033351          | INA          |
| 7930208 | -0,80 | -1,74 | 0,12289 | -1,08 | -2,11 | 0,01940 | NM_032727          | APCS         |
| 7906458 | -0,80 | -1,74 | 0,12647 | -1,73 | -3,31 | 0,00114 | NM_001639          | QTRTD1       |
| 8081786 | -0,80 | -1,74 | 0,04750 | 1,70  | 3,25  | 0,00000 | NM_024638          | GTSE1        |
| 8073858 | -0,80 | -1,74 | 0,00314 | 1,04  | 2,05  | 0,01215 | NM_016426          | ---          |
| 7962242 | -0,80 | -1,74 | 0,02446 | -0,91 | -1,88 | 0,11596 | --- PTK6           |              |
| 8067662 | -0,80 | -1,74 | 0,07551 | -0,20 | -1,15 | 0,69092 | NM_005975          | SULT1A3      |
| 7994582 | -0,80 | -1,74 | 0,02542 | 1,14  | 2,20  | 0,01141 | NM_003166          | KIAA0415     |
| 8131265 | -0,80 | -1,74 | 0,30127 | -0,28 | -1,21 | 0,33230 | NM_014855          | ---          |
| 8174279 | -0,80 | -1,74 | 0,04913 | -0,70 | -1,63 | 0,03287 | --- ---            |              |
| 7926981 | -0,80 | -1,74 | 0,09361 | -0,66 | -1,58 | 0,01574 | --- ---            |              |
| 8140855 | -0,80 | -1,74 | 0,04794 | -0,59 | -1,51 | 0,00376 | --- PPP1R9B        |              |
| 8016628 | -0,80 | -1,75 | 0,00057 | 0,02  | 1,02  | 0,94670 | NM_032595          | SLC22A24     |
| 7948951 | -0,80 | -1,75 | 0,11106 | -1,42 | -2,68 | 0,00017 | NM_001136506       | UPK3A        |
| 8073743 | -0,80 | -1,75 | 0,06563 | -0,39 | -1,31 | 0,40733 | NM_006953          | FLJ44790     |
| 8063869 | -0,80 | -1,75 | 0,20803 | -0,28 | -1,22 | 0,13248 | AK126744 SLC7A10   |              |
| 8035993 | -0,80 | -1,75 | 0,16919 | 0,28  | 1,22  | 0,39584 | NM_019849          | MICALL2      |
| 8137715 | -0,80 | -1,75 | 0,00084 | 0,47  | 1,38  | 0,37463 | NM_182924          | PLEKHG3      |
| 7975095 | -0,80 | -1,75 | 0,02565 | -0,05 | -1,04 | 0,79021 | NM_015549          | ---          |
| 8121214 | -0,80 | -1,75 | 0,33287 | -1,32 | -2,49 | 0,10359 | --- ---            |              |
| 8094739 | -0,80 | -1,75 | 0,06688 | -1,02 | -2,02 | 0,03130 | --- ---            |              |
| 8023591 | -0,80 | -1,75 | 0,00975 | 0,24  | 1,18  | 0,56028 | --- ---            |              |
| 7914805 | -0,80 | -1,75 | 0,11172 | -1,58 | -2,98 | 0,01208 | --- NCRNA00205     |              |
| 8070891 | -0,80 | -1,75 | 0,15054 | -2,25 | -4,75 | 0,00140 | AF426264 HYAL4     |              |
| 8135827 | -0,80 | -1,75 | 0,09972 | -0,86 | -1,81 | 0,00502 | NM_012269          | AIDA         |
| 7924491 | -0,80 | -1,75 | 0,23924 | -1,22 | -2,33 | 0,00884 | NM_022831          | DPRX         |
| 8031013 | -0,80 | -1,75 | 0,24520 | -0,53 | -1,44 | 0,12687 | NM_001012728       | HHIPL2       |
| 7924465 | -0,80 | -1,75 | 0,08817 | -1,23 | -2,35 | 0,00158 | NM_024746          | LOC100131496 |
| 8063209 | -0,80 | -1,75 | 0,25765 | -1,34 | -2,54 | 0,00317 | NR_024594          | ---          |
| 8022502 | -0,80 | -1,75 | 0,05682 | -2,66 | -6,32 | 0,00223 | --- ZSCAN18        |              |
| 8039730 | -0,80 | -1,75 | 0,15825 | -0,53 | -1,45 | 0,09586 | NM_023926          | POLN         |
| 8098958 | -0,80 | -1,75 | 0,18296 | -0,88 | -1,84 | 0,03934 | NM_181808          | ---          |
| 8043020 | -0,80 | -1,75 | 0,13462 | -1,15 | -2,22 | 0,00027 | --- FLJ43826       |              |
| 8006836 | -0,80 | -1,75 | 0,04602 | -1,59 | -3,02 | 0,00031 | BC111725 KIAA1257  |              |
| 8090518 | -0,80 | -1,75 | 0,09865 | -0,91 | -1,88 | 0,00030 | ENST00000265068    | C1orf50      |
| 7900603 | -0,81 | -1,75 | 0,09287 | -0,68 | -1,60 | 0,00768 | AK299874 TBX4      |              |
| 8008982 | -0,81 | -1,75 | 0,04980 | 2,15  | 4,44  | 0,00009 | NM_018488          | ARHGDI6      |
| 7991800 | -0,81 | -1,75 | 0,02510 | 0,10  | 1,07  | 0,55354 | NM_001176          | CBLN1        |
| 8001329 | -0,81 | -1,75 | 0,02316 | -0,57 | -1,49 | 0,06309 | NM_004352          | ZIC4         |
| 8091342 | -0,81 | -1,75 | 0,01268 | -1,21 | -2,32 | 0,02533 | NM_032153          | ISG15        |
| 7896817 | -0,81 | -1,75 | 0,04343 | 0,00  | -1,00 | 0,99305 | NM_005101          | ---          |
| 8151052 | -0,81 | -1,75 | 0,16052 | -1,69 | -3,22 | 0,01963 | --- ---            |              |
| 8020664 | -0,81 | -1,75 | 0,03908 | -1,08 | -2,11 | 0,05456 | --- ---            |              |
| 8014861 | -0,81 | -1,75 | 0,25232 | -1,37 | -2,59 | 0,00874 | --- A3GALT2        |              |
| 7914643 | -0,81 | -1,75 | 0,02028 | -0,97 | -1,96 | 0,00101 | ENST00000442999    | SNORD15B     |
| 7942594 | -0,81 | -1,75 | 0,04942 | -0,73 | -1,66 | 0,04670 | NR_000025          | GMIP         |
| 8035714 | -0,81 | -1,75 | 0,17029 | -0,76 | -1,69 | 0,13434 | NM_016573          | ---          |
| 8100553 | -0,81 | -1,75 | 0,07256 | -1,43 | -2,70 | 0,00040 | --- NOS1           |              |
| 7966779 | -0,81 | -1,75 | 0,02993 | -0,97 | -1,96 | 0,04642 | NM_000620          | ---          |
| 8100068 | -0,81 | -1,75 | 0,11865 | -1,26 | -2,39 | 0,00234 | --- SULT1A2        |              |
| 8000582 | -0,81 | -1,75 | 0,03870 | -0,15 | -1,11 | 0,67938 | NM_001054          | CYLC2        |
| 8156971 | -0,81 | -1,75 | 0,00217 | -0,64 | -1,56 | 0,00248 | NM_001340          | ---          |
| 7922324 | -0,81 | -1,75 | 0,04132 | -0,54 | -1,45 | 0,08358 | --- ---            |              |
| 7916667 | -0,81 | -1,75 | 0,13419 | -0,79 | -1,73 | 0,00563 | --- ---            |              |
| 7932676 | -0,81 | -1,75 | 0,01336 | -1,61 | -3,06 | 0,03287 | --- CR1            |              |
| 7909371 | -0,81 | -1,75 | 0,08245 | -0,65 | -1,57 | 0,01735 | NM_000573          | ---          |
| 8121041 | -0,81 | -1,75 | 0,02959 | -0,75 | -1,68 | 0,00315 | --- NPY5R          |              |
| 8098146 | -0,81 | -1,75 | 0,00377 | -0,58 | -1,50 | 0,00104 | NM_006174          | HTR3A        |
| 7943969 | -0,81 | -1,75 | 0,00509 | -0,97 | -1,96 | 0,08682 | NM_213621          | FLJ37786     |
| 8053731 | -0,81 | -1,75 | 0,31383 | -1,98 | -3,95 | 0,00594 | AK095105 RAB11FIP5 |              |
| 8052994 | -0,81 | -1,75 | 0,14093 | -0,89 | -1,85 | 0,04800 | NM_015470          | MIR30E       |
| 7900488 | -0,81 | -1,75 | 0,01574 | -0,20 | -1,15 | 0,46183 | NR_029846          | RPE65        |
| 7916882 | -0,81 | -1,75 | 0,01078 | -1,13 | -2,19 | 0,00016 | NM_000329          | SVOPL        |
| 8143209 | -0,81 | -1,75 | 0,00830 | -1,16 | -2,23 | 0,06553 | NM_001139456       | LOC388152    |
| 7985444 | -0,81 | -1,75 | 0,00031 | -0,19 | -1,14 | 0,75316 | NR_027001          | HSD3B7       |
| 7995007 | -0,81 | -1,75 | 0,02801 | 0,24  | 1,18  | 0,45593 | NM_025193          | SYCP1        |
| 7904168 | -0,81 | -1,75 | 0,05317 | -0,74 | -1,67 | 0,00546 | NM_003176          | RNU5F        |
| 7915590 | -0,81 | -1,75 | 0,06914 | -0,46 | -1,38 | 0,02420 | NR_002753          | SLC36A2      |

|         |       |       |         |       |       |         |                   |              |
|---------|-------|-------|---------|-------|-------|---------|-------------------|--------------|
| 8115287 | -0,81 | -1,75 | 0,06351 | -1,36 | -2,57 | 0,00970 | NM_181776         | OR10P1       |
| 7956007 | -0,81 | -1,75 | 0,15414 | -2,24 | -4,72 | 0,00069 | NM_206899         | STX1B        |
| 8000963 | -0,81 | -1,75 | 0,01930 | -0,55 | -1,46 | 0,03365 | NM_052874         | NANOS3       |
| 8026214 | -0,81 | -1,75 | 0,16940 | -1,55 | -2,93 | 0,02976 | NM_001098622      | GSDMC        |
| 8152828 | -0,81 | -1,75 | 0,03181 | -0,35 | -1,28 | 0,01834 | NM_031415         | ---          |
| 7957602 | -0,81 | -1,75 | 0,02497 | -0,95 | -1,94 | 0,03054 | --- FAM83A        | ---          |
| 8148184 | -0,81 | -1,75 | 0,10786 | 2,96  | 7,78  | 0,00151 | NM_032899         | TAS2R10      |
| 7961249 | -0,81 | -1,75 | 0,05409 | -0,39 | -1,31 | 0,12657 | NM_023921         | ---          |
| 7917904 | -0,81 | -1,75 | 0,08097 | -0,70 | -1,62 | 0,05485 | --- EXD3          | ---          |
| 8165512 | -0,81 | -1,75 | 0,06462 | -0,77 | -1,71 | 0,10318 | NM_017820         | ---          |
| 8148147 | -0,81 | -1,75 | 0,05190 | -0,97 | -1,96 | 0,05728 | --- ---           | ---          |
| 8175153 | -0,81 | -1,75 | 0,00198 | -1,17 | -2,25 | 0,00030 | --- PPBPL2        | ---          |
| 8100990 | -0,81 | -1,75 | 0,02395 | -1,01 | -2,02 | 0,03071 | NR_026769         | ---          |
| 8168461 | -0,81 | -1,75 | 0,18467 | -0,81 | -1,75 | 0,00042 | --- ---           | ---          |
| 8176284 | -0,81 | -1,75 | 0,18467 | -0,81 | -1,75 | 0,00042 | --- C19orf29      | ---          |
| 8032637 | -0,81 | -1,75 | 0,23377 | 0,06  | 1,04  | 0,83847 | NM_001080543      | KHDRBS2      |
| 8127370 | -0,81 | -1,75 | 0,14340 | -1,82 | -3,52 | 0,00058 | NM_152688         | DEDD2        |
| 8037144 | -0,81 | -1,75 | 0,00315 | 0,65  | 1,57  | 0,20590 | NM_133328         | TBC1D21      |
| 7984759 | -0,81 | -1,75 | 0,07407 | -1,31 | -2,48 | 0,02072 | NM_153356         | ---          |
| 8067834 | -0,81 | -1,75 | 0,07841 | -1,45 | -2,73 | 0,00063 | --- KCNMB1        | ---          |
| 8115756 | -0,81 | -1,75 | 0,11995 | -1,43 | -2,69 | 0,00072 | NM_004137         | ---          |
| 8112014 | -0,81 | -1,75 | 0,28039 | -0,20 | -1,15 | 0,09308 | --- C20orf70      | ---          |
| 8061847 | -0,81 | -1,75 | 0,22653 | -1,35 | -2,55 | 0,00763 | NM_080574         | CD200R1      |
| 8089568 | -0,81 | -1,75 | 0,02170 | -1,27 | -2,41 | 0,01559 | NM_138806         | BLK          |
| 8144625 | -0,81 | -1,75 | 0,03677 | -1,34 | -2,52 | 0,00127 | NM_001715         | PIWIL3       |
| 8075026 | -0,81 | -1,75 | 0,09595 | -1,21 | -2,32 | 0,00214 | NM_001008496      | RBM19        |
| 7966638 | -0,81 | -1,75 | 0,10625 | 0,61  | 1,53  | 0,20010 | NM_016196         | GUCA2B       |
| 7900531 | -0,81 | -1,75 | 0,15771 | -1,36 | -2,56 | 0,00714 | NM_007102         | CLDN9        |
| 7992782 | -0,81 | -1,75 | 0,12227 | -1,11 | -2,17 | 0,00693 | NM_020982         | CENPL        |
| 7922391 | -0,81 | -1,75 | 0,03072 | 0,10  | 1,07  | 0,81375 | NM_001127181      | ---          |
| 7953098 | -0,81 | -1,75 | 0,14228 | -1,06 | -2,08 | 0,08565 | --- CCDC33        | ---          |
| 7984819 | -0,81 | -1,75 | 0,12294 | -0,76 | -1,69 | 0,13665 | NM_025055         | POU3F4       |
| 8168567 | -0,81 | -1,75 | 0,04894 | -1,69 | -3,24 | 0,00433 | NM_000307         | MAPKBP1      |
| 7982985 | -0,81 | -1,75 | 0,01723 | 0,04  | 1,03  | 0,92922 | NM_014994         | NPY1R        |
| 8103494 | -0,81 | -1,75 | 0,09106 | -0,21 | -1,16 | 0,67042 | NM_000909         | ABCG8        |
| 8041696 | -0,81 | -1,75 | 0,03787 | -1,28 | -2,43 | 0,03255 | NM_022437         | SLC8A2       |
| 8037888 | -0,81 | -1,75 | 0,04310 | -1,19 | -2,28 | 0,06478 | NM_015063         | GPR150       |
| 8106976 | -0,81 | -1,75 | 0,18250 | -2,73 | -6,63 | 0,00263 | NM_199243         | TRO          |
| 8167835 | -0,81 | -1,75 | 0,22490 | -1,76 | -3,40 | 0,01217 | NM_001039705      | BARX2        |
| 7945162 | -0,81 | -1,75 | 0,16999 | -0,22 | -1,16 | 0,52810 | NM_003658         | SLC4A1       |
| 8015991 | -0,81 | -1,75 | 0,06562 | -1,01 | -2,02 | 0,00558 | NM_000342         | ---          |
| 8122670 | -0,81 | -1,75 | 0,04759 | -0,51 | -1,43 | 0,13382 | --- C19orf24      | ---          |
| 8024246 | -0,81 | -1,75 | 0,09869 | 0,23  | 1,17  | 0,55101 | NM_017914         | ---          |
| 8061092 | -0,81 | -1,75 | 0,11914 | -0,70 | -1,62 | 0,02525 | --- SCGN          | ---          |
| 8117288 | -0,81 | -1,75 | 0,03061 | -0,95 | -1,94 | 0,01615 | NM_006998         | CCK          |
| 8086391 | -0,81 | -1,75 | 0,12763 | -1,98 | -3,93 | 0,00007 | NM_000729         | KIAA0087     |
| 8138686 | -0,81 | -1,75 | 0,06954 | -1,11 | -2,16 | 0,01073 | NR_022006         | FLJ33544     |
| 8060790 | -0,81 | -1,75 | 0,06751 | -0,59 | -1,51 | 0,16849 | AK090863 LGI3     | ---          |
| 8149685 | -0,81 | -1,75 | 0,00905 | 0,10  | 1,07  | 0,76561 | NM_139278         | MIR219-2     |
| 8164438 | -0,81 | -1,75 | 0,22929 | -0,31 | -1,24 | 0,19985 | NR_029837         | STX1A        |
| 8140113 | -0,81 | -1,76 | 0,23705 | 1,27  | 2,42  | 0,02356 | NM_004603         | RUNDC3A      |
| 8007607 | -0,81 | -1,76 | 0,00136 | -0,86 | -1,82 | 0,04419 | NM_006695         | ---          |
| 8144512 | -0,81 | -1,76 | 0,11767 | -1,04 | -2,06 | 0,01298 | --- EFCAB4B       | ---          |
| 7960365 | -0,81 | -1,76 | 0,25288 | 2,14  | 4,41  | 0,01987 | NM_001144958      | SLC5A7       |
| 8044191 | -0,81 | -1,76 | 0,01125 | -0,87 | -1,83 | 0,00770 | NM_021815         | TXNDC6       |
| 8090972 | -0,81 | -1,76 | 0,16560 | -1,12 | -2,18 | 0,02780 | NM_178130         | MIR148A      |
| 8138668 | -0,81 | -1,76 | 0,04262 | -1,34 | -2,53 | 0,00385 | NR_029597         | ---          |
| 8176568 | -0,81 | -1,76 | 0,15016 | -0,46 | -1,37 | 0,10337 | --- JUND          | ---          |
| 8035445 | -0,81 | -1,76 | 0,06424 | -0,39 | -1,31 | 0,53968 | NM_005354         | POTEG        |
| 7977456 | -0,81 | -1,76 | 0,13705 | -2,11 | -4,32 | 0,00609 | NR_027480         | PRDM7        |
| 8003571 | -0,81 | -1,76 | 0,13296 | -0,76 | -1,69 | 0,31373 | NM_001098173      | LOC100128262 |
| 8084921 | -0,81 | -1,76 | 0,17054 | -1,07 | -2,11 | 0,00161 | AK094115 C15orf55 | ---          |
| 7982516 | -0,81 | -1,76 | 0,05437 | -1,09 | -2,13 | 0,01178 | NM_175741         | MEPCE        |
| 8134821 | -0,81 | -1,76 | 0,01097 | 0,18  | 1,13  | 0,77168 | NM_019606         | OR2V2        |
| 8110647 | -0,81 | -1,76 | 0,22215 | -0,87 | -1,82 | 0,07718 | NM_206880         | ---          |
| 7945894 | -0,81 | -1,76 | 0,30999 | -0,09 | -1,06 | 0,70040 | --- CHMP1A        | ---          |
| 8003467 | -0,81 | -1,76 | 0,04751 | 0,62  | 1,54  | 0,38033 | NM_001083314      | ---          |
| 7969286 | -0,81 | -1,76 | 0,01143 | -0,92 | -1,89 | 0,00430 | --- DGKZ          | ---          |
| 7968890 | -0,81 | -1,76 | 0,00403 | 0,43  | 1,35  | 0,32099 | NM_003646         | ---          |
| 7916489 | -0,81 | -1,76 | 0,04737 | -0,98 | -1,97 | 0,00007 | --- MPZ           | ---          |
| 7921852 | -0,81 | -1,76 | 0,38733 | -0,58 | -1,50 | 0,00938 | NM_000530         | TREX2        |
| 8175802 | -0,81 | -1,76 | 0,09116 | -1,23 | -2,35 | 0,10859 | NM_080701         | ---          |
| 8105338 | -0,81 | -1,76 | 0,04766 | -1,40 | -2,64 | 0,00527 | --- DYSF          | ---          |

|         |       |       |         |       |       |         |                 |           |
|---------|-------|-------|---------|-------|-------|---------|-----------------|-----------|
| 8042637 | -0,81 | -1,76 | 0,01051 | 1,64  | 3,11  | 0,00244 | NM_001130978    | HK2       |
| 8042942 | -0,81 | -1,76 | 0,10106 | -0,14 | -1,10 | 0,83198 | NM_000189       | GPR132    |
| 7981530 | -0,81 | -1,76 | 0,17840 | -0,39 | -1,31 | 0,48490 | NM_013345       | DNAJB13   |
| 7950299 | -0,81 | -1,76 | 0,01863 | -1,09 | -2,13 | 0,00254 | NM_153614       | SERPINB7  |
| 8021623 | -0,81 | -1,76 | 0,05481 | -0,60 | -1,51 | 0,04578 | NM_003784       | LGSN      |
| 8127380 | -0,81 | -1,76 | 0,04489 | 1,96  | 3,89  | 0,00852 | NM_016571       | TRIM9     |
| 7979108 | -0,81 | -1,76 | 0,01256 | -0,91 | -1,88 | 0,00421 | NM_052978       | OVCH2     |
| 7946306 | -0,81 | -1,76 | 0,08420 | -1,83 | -3,55 | 0,00068 | NM_198185       | SYCP2L    |
| 8116874 | -0,81 | -1,76 | 0,02986 | 0,51  | 1,43  | 0,06130 | NM_001040274    | RIMS4     |
| 8066451 | -0,81 | -1,76 | 0,06622 | -0,47 | -1,38 | 0,23924 | NM_182970       | RRP7B     |
| 8076463 | -0,81 | -1,76 | 0,00150 | -0,80 | -1,74 | 0,08414 | BC014647 KCNJ15 |           |
| 8068583 | -0,81 | -1,76 | 0,01075 | -1,18 | -2,27 | 0,00243 | NM_002243       | ---       |
| 7981235 | -0,81 | -1,76 | 0,02650 | -1,60 | -3,02 | 0,00053 | ---             | MAMDC4    |
| 8159448 | -0,81 | -1,76 | 0,06420 | -0,96 | -1,95 | 0,16085 | NM_206920       | ACER1     |
| 8033151 | -0,81 | -1,76 | 0,11068 | -0,61 | -1,53 | 0,04437 | NM_133492       | ---       |
| 8073341 | -0,81 | -1,76 | 0,04525 | -0,67 | -1,59 | 0,00214 | ---             | ---       |
| 8002264 | -0,81 | -1,76 | 0,05055 | -1,21 | -2,31 | 0,10105 | ---             | ASCL2     |
| 7945730 | -0,81 | -1,76 | 0,13393 | -1,11 | -2,15 | 0,08890 | NM_005170       | ---       |
| 8000600 | -0,81 | -1,76 | 0,10963 | -1,27 | -2,40 | 0,03465 | ---             | ZNF428    |
| 8037355 | -0,81 | -1,76 | 0,02524 | -0,96 | -1,95 | 0,00022 | NM_182498       | ---       |
| 8113481 | -0,82 | -1,76 | 0,13795 | -0,89 | -1,85 | 0,04872 | ---             | MIR29C    |
| 7923974 | -0,82 | -1,76 | 0,00868 | -1,14 | -2,21 | 0,01042 | NR_029832       | KCNH1     |
| 7924071 | -0,82 | -1,76 | 0,00099 | 1,31  | 2,47  | 0,04173 | NM_172362       | DNAH6     |
| 8043055 | -0,82 | -1,76 | 0,00190 | -0,82 | -1,76 | 0,00283 | NM_001370       | ACTL7B    |
| 8163019 | -0,82 | -1,76 | 0,27509 | -1,10 | -2,14 | 0,00392 | NM_006686       | ---       |
| 8012839 | -0,82 | -1,76 | 0,00609 | -1,22 | -2,33 | 0,03150 | ---             | PTGIR     |
| 8037775 | -0,82 | -1,76 | 0,00748 | -0,92 | -1,89 | 0,09396 | NM_000960       | PPY2      |
| 8005836 | -0,82 | -1,76 | 0,23806 | -1,27 | -2,41 | 0,00933 | NR_002181       | TRAF3IP3  |
| 7909455 | -0,82 | -1,76 | 0,05006 | -1,17 | -2,25 | 0,00210 | NM_025228       | LOC51145  |
| 8164196 | -0,82 | -1,76 | 0,03081 | -1,16 | -2,23 | 0,04878 | AF159054        | ---       |
| 8161482 | -0,82 | -1,76 | 0,15166 | -1,60 | -3,03 | 0,00468 | ---             | ---       |
| 8161566 | -0,82 | -1,76 | 0,15166 | -1,60 | -3,03 | 0,00468 | ---             | LOC729173 |
| 7944527 | -0,82 | -1,76 | 0,07729 | -0,77 | -1,71 | 0,05896 | ENST00000319763 | ---       |
| 8134431 | -0,82 | -1,76 | 0,23619 | -0,51 | -1,42 | 0,29641 | ---             | ---       |
| 8069517 | -0,82 | -1,76 | 0,10210 | -1,07 | -2,10 | 0,01354 | ---             | ---       |
| 7974027 | -0,82 | -1,76 | 0,21873 | -1,72 | -3,29 | 0,00509 | ---             | ZNF530    |
| 8031778 | -0,82 | -1,76 | 0,00706 | -0,77 | -1,71 | 0,05101 | NM_020880       | CELSR3    |
| 8087145 | -0,82 | -1,76 | 0,02014 | -0,07 | -1,05 | 0,88463 | NM_001407       | RTN1      |
| 7979455 | -0,82 | -1,76 | 0,28681 | -0,83 | -1,78 | 0,01934 | NM_021136       | OR2A1     |
| 8143627 | -0,82 | -1,76 | 0,11223 | -0,73 | -1,66 | 0,01826 | NM_001005287    | ---       |
| 7922887 | -0,82 | -1,76 | 0,15960 | -0,99 | -1,99 | 0,01010 | ---             | NELL1     |
| 7938925 | -0,82 | -1,76 | 0,00560 | -0,84 | -1,79 | 0,01709 | NM_006157       | COL4A3    |
| 8048782 | -0,82 | -1,76 | 0,02681 | -0,89 | -1,86 | 0,00604 | NM_000091       | C6orf132  |
| 8126382 | -0,82 | -1,76 | 0,03691 | 0,35  | 1,27  | 0,34061 | NM_001164446    | ---       |
| 7988258 | -0,82 | -1,76 | 0,04611 | -0,89 | -1,86 | 0,14511 | ---             | DGKQ      |
| 8098822 | -0,82 | -1,76 | 0,14310 | -1,18 | -2,26 | 0,04691 | NM_001347       | ---       |
| 7982337 | -0,82 | -1,76 | 0,10729 | -0,64 | -1,55 | 0,05985 | ---             | WIT1      |
| 7939131 | -0,82 | -1,76 | 0,00508 | -1,28 | -2,43 | 0,02740 | NR_023920       | LINGO3    |
| 8032478 | -0,82 | -1,76 | 0,37300 | -0,67 | -1,60 | 0,16776 | NM_001101391    | SLC1A6    |
| 8034907 | -0,82 | -1,76 | 0,12143 | -1,44 | -2,71 | 0,00859 | NM_005071       | ---       |
| 8080617 | -0,82 | -1,76 | 0,13635 | -1,77 | -3,41 | 0,00573 | ---             | RNF148    |
| 8142622 | -0,82 | -1,76 | 0,00670 | -1,60 | -3,03 | 0,00668 | NM_198085       | ---       |
| 8100549 | -0,82 | -1,76 | 0,06800 | -0,99 | -1,99 | 0,00225 | ---             | ---       |
| 8049665 | -0,82 | -1,76 | 0,07567 | -1,65 | -3,15 | 0,00119 | ---             | RPS6KA4   |
| 7941039 | -0,82 | -1,76 | 0,17154 | -0,50 | -1,42 | 0,22367 | NM_003942       | ---       |
| 8011732 | -0,82 | -1,76 | 0,02097 | -0,92 | -1,89 | 0,01685 | ---             | FABP2     |
| 8102523 | -0,82 | -1,76 | 0,00969 | -0,73 | -1,66 | 0,02859 | NM_000134       | KCNB2     |
| 8146908 | -0,82 | -1,76 | 0,03540 | -1,21 | -2,31 | 0,00930 | NM_004770       | CADM4     |
| 8037363 | -0,82 | -1,76 | 0,13860 | 0,04  | 1,03  | 0,89895 | NM_145296       | UNK       |
| 8018445 | -0,82 | -1,76 | 0,06272 | -0,56 | -1,48 | 0,00212 | NM_001080419    | ---       |
| 8168674 | -0,82 | -1,76 | 0,25761 | 1,24  | 2,37  | 0,04589 | ---             | ---       |
| 7929812 | -0,82 | -1,76 | 0,02832 | -1,51 | -2,85 | 0,00483 | ---             | HBCBP     |
| 7956285 | -0,82 | -1,76 | 0,10457 | -0,82 | -1,76 | 0,01260 | AF529371        | ---       |
| 7954697 | -0,82 | -1,76 | 0,23901 | -1,74 | -3,34 | 0,10854 | ---             | BEST3     |
| 7964852 | -0,82 | -1,76 | 0,01129 | -0,81 | -1,75 | 0,00053 | NM_032735       | CCR7      |
| 8015031 | -0,82 | -1,76 | 0,23840 | -1,69 | -3,23 | 0,00145 | NM_001838       | TRIM71    |
| 8078435 | -0,82 | -1,76 | 0,18990 | -1,53 | -2,89 | 0,01156 | NM_001039111    | SYP       |
| 8172573 | -0,82 | -1,76 | 0,00449 | -0,56 | -1,47 | 0,07494 | NM_003179       | ---       |
| 8175365 | -0,82 | -1,76 | 0,05200 | -1,12 | -2,18 | 0,02003 | ---             | GBP6      |
| 7902850 | -0,82 | -1,76 | 0,01363 | -1,10 | -2,15 | 0,07448 | NM_198460       | CXCR3     |
| 8173493 | -0,82 | -1,76 | 0,04290 | -1,95 | -3,87 | 0,00194 | NM_001142797    | TPPP2     |
| 7973142 | -0,82 | -1,76 | 0,08859 | -1,64 | -3,11 | 0,00098 | NM_173846       | FGD3      |
| 8156373 | -0,82 | -1,77 | 0,16858 | -0,93 | -1,91 | 0,09067 | NM_001083536    | CES7      |

|         |       |       |         |       |        |         |              |              |
|---------|-------|-------|---------|-------|--------|---------|--------------|--------------|
| 8001464 | -0,82 | -1,77 | 0,13959 | -1,34 | -2,53  | 0,01559 | NM_001143685 | ---          |
| 8080142 | -0,82 | -1,77 | 0,01555 | -1,97 | -3,91  | 0,01016 | ---          | C9orf86      |
| 8159415 | -0,82 | -1,77 | 0,01810 | 0,55  | 1,46   | 0,30958 | NM_024718    | ---          |
| 8028192 | -0,82 | -1,77 | 0,04492 | -0,99 | -1,98  | 0,01703 | ---          | OR2L8        |
| 7911241 | -0,82 | -1,77 | 0,40730 | -3,10 | -8,57  | 0,00023 | NM_001001963 | OR2M3        |
| 7911267 | -0,82 | -1,77 | 0,33790 | -1,18 | -2,27  | 0,06843 | NM_001004689 | CTNNB1       |
| 8062409 | -0,82 | -1,77 | 0,01108 | 1,02  | 2,03   | 0,00530 | NM_030877    | GPR162       |
| 7953442 | -0,82 | -1,77 | 0,02782 | -0,96 | -1,95  | 0,00466 | NM_019858    | C8orf79      |
| 8144712 | -0,82 | -1,77 | 0,17967 | -0,33 | -1,26  | 0,11337 | NM_001099677 | SPATA21      |
| 7912764 | -0,82 | -1,77 | 0,03712 | -0,69 | -1,61  | 0,02748 | NM_198546    | SLC26A3      |
| 8142171 | -0,82 | -1,77 | 0,03939 | -1,06 | -2,09  | 0,11840 | NM_000111    | CYP2C8       |
| 7935169 | -0,82 | -1,77 | 0,00119 | -0,49 | -1,40  | 0,12716 | NM_000770    | MYH3         |
| 8012787 | -0,82 | -1,77 | 0,02790 | -1,24 | -2,37  | 0,00224 | NM_002470    | ---          |
| 7981373 | -0,82 | -1,77 | 0,00309 | -1,24 | -2,37  | 0,00688 | ---          | PI3          |
| 8062927 | -0,82 | -1,77 | 0,20787 | -0,01 | -1,01  | 0,97409 | NM_002638    | IGHA1        |
| 7981722 | -0,82 | -1,77 | 0,63930 | -4,74 | -26,78 | 0,00014 | AK128476     | KLRK1        |
| 7961151 | -0,82 | -1,77 | 0,00779 | -0,89 | -1,85  | 0,02782 | NM_007360    | NHLH2        |
| 7918891 | -0,82 | -1,77 | 0,09062 | -0,51 | -1,43  | 0,04301 | NM_005599    | EXOC3L2      |
| 8037513 | -0,82 | -1,77 | 0,08674 | -1,16 | -2,23  | 0,08529 | NM_138568    | RADIL        |
| 8137906 | -0,82 | -1,77 | 0,17778 | -1,09 | -2,13  | 0,05580 | NM_018059    | ---          |
| 7953747 | -0,82 | -1,77 | 0,01413 | -0,51 | -1,42  | 0,02795 | ---          | TAS2R14      |
| 7961279 | -0,82 | -1,77 | 0,11803 | -0,50 | -1,42  | 0,36746 | NM_023922    | ---          |
| 8072131 | -0,82 | -1,77 | 0,07713 | -1,22 | -2,33  | 0,00434 | ---          | LOC645261    |
| 8112998 | -0,82 | -1,77 | 0,16089 | -0,95 | -1,93  | 0,18402 | AF258587     | SLFN14       |
| 8014259 | -0,82 | -1,77 | 0,04644 | -1,49 | -2,80  | 0,01320 | NM_001129820 | ---          |
| 8060736 | -0,82 | -1,77 | 0,09607 | -0,82 | -1,76  | 0,05498 | ---          | MRPL4        |
| 8025586 | -0,82 | -1,77 | 0,12416 | 0,44  | 1,36   | 0,37213 | NM_146388    | C11orf83     |
| 7940669 | -0,82 | -1,77 | 0,10628 | 0,57  | 1,49   | 0,08903 | NM_001085372 | SMPD3        |
| 8002249 | -0,82 | -1,77 | 0,11779 | -0,99 | -1,99  | 0,03132 | NM_018667    | OR4F16       |
| 7896744 | -0,82 | -1,77 | 0,66272 | -2,19 | -4,58  | 0,00469 | NM_001005277 | OR4F16       |
| 7911345 | -0,82 | -1,77 | 0,66272 | -2,19 | -4,58  | 0,00469 | NM_001005277 | OR4F16       |
| 8110672 | -0,82 | -1,77 | 0,66272 | -2,19 | -4,58  | 0,00469 | NM_001005277 | KIAA2013     |
| 7912511 | -0,82 | -1,77 | 0,27944 | -0,23 | -1,17  | 0,66089 | NM_138346    | CRABP1       |
| 7985159 | -0,82 | -1,77 | 0,04970 | 0,12  | 1,09   | 0,66025 | NM_004378    | NCALD        |
| 8152119 | -0,82 | -1,77 | 0,05499 | -0,69 | -1,62  | 0,03033 | NM_001040624 | ---          |
| 8115037 | -0,82 | -1,77 | 0,15576 | -1,20 | -2,29  | 0,00590 | ---          | ---          |
| 8099025 | -0,82 | -1,77 | 0,01299 | -0,70 | -1,63  | 0,00736 | ---          | COL10A1      |
| 8129082 | -0,82 | -1,77 | 0,07165 | -1,81 | -3,51  | 0,00066 | NM_000493    | LOC613206    |
| 8164062 | -0,82 | -1,77 | 0,03456 | -0,85 | -1,80  | 0,01079 | AY567967     | ZNF81        |
| 8167201 | -0,82 | -1,77 | 0,02025 | -0,38 | -1,30  | 0,21310 | NM_007137    | ---          |
| 8129271 | -0,82 | -1,77 | 0,06142 | -0,79 | -1,73  | 0,00300 | ---          | LECT2        |
| 8114263 | -0,82 | -1,77 | 0,13625 | -0,84 | -1,79  | 0,04997 | NM_002302    | LOC388387    |
| 8015730 | -0,82 | -1,77 | 0,00376 | -1,07 | -2,10  | 0,03450 | NR_027254    | TAS2R40      |
| 8136846 | -0,82 | -1,77 | 0,00108 | -0,77 | -1,71  | 0,07584 | NM_176882    | ---          |
| 8175096 | -0,82 | -1,77 | 0,00146 | -0,91 | -1,88  | 0,00029 | ---          | CLECL1       |
| 7961069 | -0,82 | -1,77 | 0,06104 | -1,26 | -2,39  | 0,02614 | NM_172004    | LOC100132167 |
| 8155503 | -0,82 | -1,77 | 0,02467 | -0,61 | -1,52  | 0,12534 | BC006438     | RIBC1        |
| 8167774 | -0,82 | -1,77 | 0,10922 | -0,83 | -1,77  | 0,20251 | NM_001031745 | FAM158A      |
| 7978114 | -0,82 | -1,77 | 0,00883 | 0,46  | 1,38   | 0,14690 | BC002491     | ACADVL       |
| 8004271 | -0,82 | -1,77 | 0,19337 | 1,45  | 2,74   | 0,06596 | NM_000018    | ZP1          |
| 7940358 | -0,82 | -1,77 | 0,25695 | -0,96 | -1,94  | 0,00151 | NM_207341    | ---          |
| 8138600 | -0,82 | -1,77 | 0,02862 | -1,25 | -2,37  | 0,00014 | ---          | DUOX2        |
| 7988350 | -0,82 | -1,77 | 0,03522 | 1,11  | 2,15   | 0,01301 | NM_014080    | ZNF512B      |
| 8067773 | -0,82 | -1,77 | 0,05313 | 0,50  | 1,41   | 0,32357 | NM_020713    | POLR2J       |
| 8141762 | -0,82 | -1,77 | 0,02816 | -0,66 | -1,59  | 0,20995 | NM_006234    | INE1         |
| 8167099 | -0,82 | -1,77 | 0,18182 | -0,77 | -1,70  | 0,00014 | NR_024616    | COX8C        |
| 7976402 | -0,82 | -1,77 | 0,00367 | -0,82 | -1,76  | 0,06359 | NM_182971    | ---          |
| 8002247 | -0,82 | -1,77 | 0,10541 | -0,71 | -1,63  | 0,00409 | ---          | SLC35F4      |
| 7979387 | -0,82 | -1,77 | 0,18250 | -0,63 | -1,55  | 0,36334 | NM_001080455 | ---          |
| 8047485 | -0,82 | -1,77 | 0,00178 | -0,57 | -1,48  | 0,02444 | ---          | TMPRSS11A    |
| 8100675 | -0,82 | -1,77 | 0,09186 | -1,15 | -2,23  | 0,02390 | NM_182606    | LOC339524    |
| 7902799 | -0,82 | -1,77 | 0,03955 | -0,46 | -1,38  | 0,04981 | NR_026985    | ---          |
| 8175215 | -0,82 | -1,77 | 0,13210 | -1,22 | -2,34  | 0,01498 | ---          | RAB41        |
| 8168135 | -0,82 | -1,77 | 0,08967 | -1,04 | -2,05  | 0,00690 | NM_001032726 | ---          |
| 7911337 | -0,82 | -1,77 | 0,17274 | -3,22 | -9,32  | 0,00045 | ---          | ---          |
| 7973871 | -0,82 | -1,77 | 0,17274 | -3,22 | -9,32  | 0,00045 | ---          | ---          |
| 8165696 | -0,82 | -1,77 | 0,17274 | -3,22 | -9,32  | 0,00045 | ---          | NECAB1       |
| 8147244 | -0,82 | -1,77 | 0,17808 | -1,39 | -2,62  | 0,01147 | NM_022351    | KCNH6        |
| 8009145 | -0,82 | -1,77 | 0,04936 | -1,09 | -2,13  | 0,09676 | NM_030779    | SMYD1        |
| 8043381 | -0,82 | -1,77 | 0,12833 | -1,12 | -2,18  | 0,00651 | NM_198274    | ---          |
| 8151421 | -0,82 | -1,77 | 0,05170 | -0,66 | -1,58  | 0,08363 | ---          | OR1K1        |
| 8157698 | -0,82 | -1,77 | 0,19507 | -1,31 | -2,49  | 0,00131 | NM_080859    | ---          |
| 8136612 | -0,82 | -1,77 | 0,01191 | -1,39 | -2,61  | 0,00152 | ---          | IL11RA       |

|         |       |       |         |       |       |         |                 |             |
|---------|-------|-------|---------|-------|-------|---------|-----------------|-------------|
| 8154934 | -0,82 | -1,77 | 0,09691 | -0,09 | -1,06 | 0,61728 | NM_147162       | ZBTB10      |
| 8147040 | -0,82 | -1,77 | 0,06488 | 0,84  | 1,79  | 0,05171 | NM_001105539    | SEMA4A      |
| 7906107 | -0,82 | -1,77 | 0,06682 | -1,58 | -2,98 | 0,00194 | NM_022367       | CASS4       |
| 8063497 | -0,82 | -1,77 | 0,04738 | -1,45 | -2,73 | 0,00575 | NM_001164116    | TNNI1       |
| 7923360 | -0,82 | -1,77 | 0,16564 | -1,74 | -3,33 | 0,00813 | NM_003281       | RTN4RL1     |
| 8011214 | -0,82 | -1,77 | 0,00047 | -0,80 | -1,74 | 0,04804 | NM_178568       | TAF6L       |
| 7940698 | -0,83 | -1,77 | 0,14925 | -0,16 | -1,12 | 0,57042 | NM_006473       | HNRNPCL1    |
| 7912552 | -0,83 | -1,77 | 0,12042 | -1,14 | -2,20 | 0,15986 | NM_001013631    | RFX2        |
| 8033097 | -0,83 | -1,77 | 0,01894 | -0,24 | -1,18 | 0,58297 | NM_000635       | ---         |
| 8176415 | -0,83 | -1,77 | 0,00773 | -1,11 | -2,17 | 0,00274 | ---             | ---         |
| 8150590 | -0,83 | -1,77 | 0,17812 | -0,77 | -1,70 | 0,00043 | ---             | OR6J1       |
| 7977782 | -0,83 | -1,77 | 0,06764 | -1,05 | -2,07 | 0,03692 | ENST00000312039 | TSPAN33     |
| 8136067 | -0,83 | -1,77 | 0,04842 | 1,99  | 3,97  | 0,00326 | NM_178562       | OR2W5       |
| 7911197 | -0,83 | -1,77 | 0,03835 | -1,21 | -2,31 | 0,00002 | NM_001004698    | SLCSA10     |
| 8005529 | -0,83 | -1,77 | 0,09923 | -0,80 | -1,75 | 0,01551 | NM_152351       | CT45A4      |
| 8175336 | -0,83 | -1,77 | 0,17920 | -1,49 | -2,82 | 0,01658 | NM_001017436    | TLR8        |
| 8166065 | -0,83 | -1,77 | 0,01121 | -0,74 | -1,67 | 0,07919 | NM_138636       | ---         |
| 8145566 | -0,83 | -1,77 | 0,09245 | -0,82 | -1,77 | 0,13520 | ---             | CDH8        |
| 8001784 | -0,83 | -1,77 | 0,11592 | -1,23 | -2,34 | 0,08809 | NM_001796       | CRISP2      |
| 8126891 | -0,83 | -1,77 | 0,06447 | -1,08 | -2,11 | 0,00670 | NM_003296       | C1orf146    |
| 7902984 | -0,83 | -1,77 | 0,09982 | -1,11 | -2,17 | 0,00653 | NM_001012425    | ANXA13      |
| 8152719 | -0,83 | -1,77 | 0,01703 | -0,90 | -1,86 | 0,00920 | NM_001003954    | ---         |
| 7963696 | -0,83 | -1,77 | 0,09418 | -0,89 | -1,86 | 0,01262 | ---             | ---         |
| 8103847 | -0,83 | -1,77 | 0,53692 | -0,94 | -1,92 | 0,12008 | ---             | S100A9      |
| 7905571 | -0,83 | -1,77 | 0,03886 | -1,29 | -2,45 | 0,00026 | NM_002965       | ABCA3       |
| 7998784 | -0,83 | -1,77 | 0,00020 | 1,15  | 2,22  | 0,05093 | NM_001089       | PDC         |
| 7922969 | -0,83 | -1,77 | 0,08165 | -1,07 | -2,10 | 0,01392 | NM_002597       | PLA2G5      |
| 7898609 | -0,83 | -1,77 | 0,11062 | -1,53 | -2,89 | 0,02529 | NM_000929       | CPAMD8      |
| 8035201 | -0,83 | -1,77 | 0,11268 | -0,64 | -1,56 | 0,00908 | NM_015692       | RGS18       |
| 7908376 | -0,83 | -1,77 | 0,00759 | -1,38 | -2,60 | 0,00002 | NM_130782       | SAMD3       |
| 8129482 | -0,83 | -1,77 | 0,09576 | -1,15 | -2,22 | 0,03475 | NM_001017373    | C10orf113   |
| 7932492 | -0,83 | -1,77 | 0,02162 | -0,36 | -1,28 | 0,03315 | NM_001010896    | PTGDR       |
| 7974363 | -0,83 | -1,78 | 0,00687 | -1,07 | -2,10 | 0,02716 | NM_000953       | ABCB11      |
| 8056583 | -0,83 | -1,78 | 0,24953 | -0,68 | -1,60 | 0,05516 | NM_003742       | TBC1D25     |
| 8172443 | -0,83 | -1,78 | 0,03001 | -0,85 | -1,80 | 0,08257 | NM_002536       | CEP164      |
| 7944113 | -0,83 | -1,78 | 0,00139 | 0,29  | 1,22  | 0,18178 | NM_014956       | CCL14-CCL15 |
| 8014349 | -0,83 | -1,78 | 0,03133 | -1,92 | -3,79 | 0,00252 | NR_027921       | ANKRD11     |
| 7997907 | -0,83 | -1,78 | 0,00738 | -1,08 | -2,12 | 0,02164 | NM_013275       | ANKRD11     |
| 8170322 | -0,83 | -1,78 | 0,00738 | -1,08 | -2,12 | 0,02164 | NM_013275       | C11orf34    |
| 7951695 | -0,83 | -1,78 | 0,04163 | -1,51 | -2,85 | 0,00494 | NM_001145024    | ILDR2       |
| 7922018 | -0,83 | -1,78 | 0,03423 | -1,05 | -2,07 | 0,01555 | NM_199351       | PAX6        |
| 7947338 | -0,83 | -1,78 | 0,02327 | 0,03  | 1,02  | 0,92410 | NM_000280       | MAFF        |
| 8073007 | -0,83 | -1,78 | 0,22947 | -0,95 | -1,93 | 0,02984 | NM_012323       | GDPD3       |
| 8000799 | -0,83 | -1,78 | 0,20418 | 0,62  | 1,54  | 0,25421 | NM_024307       | SYK         |
| 8156321 | -0,83 | -1,78 | 0,12813 | 0,67  | 1,59  | 0,16359 | NM_003177       | AHDC1       |
| 7914103 | -0,83 | -1,78 | 0,12348 | -0,99 | -1,98 | 0,08603 | NM_001029882    | FAM27A      |
| 8155510 | -0,83 | -1,78 | 0,41731 | -2,20 | -4,59 | 0,00243 | NR_024060       | SIRT6       |
| 8032770 | -0,83 | -1,78 | 0,01054 | 0,80  | 1,74  | 0,08563 | NM_016539       | NRN1        |
| 8123739 | -0,83 | -1,78 | 0,02906 | 1,05  | 2,07  | 0,00765 | NM_016588       | TRIML1      |
| 8098697 | -0,83 | -1,78 | 0,02021 | -1,35 | -2,55 | 0,00467 | NM_178556       | PRSS1       |
| 8136795 | -0,83 | -1,78 | 0,12126 | -0,68 | -1,60 | 0,01591 | NM_002769       | CD72        |
| 8161004 | -0,83 | -1,78 | 0,08006 | -0,34 | -1,27 | 0,41342 | NM_001782       | STK11IP     |
| 8048647 | -0,83 | -1,78 | 0,14871 | -0,21 | -1,16 | 0,68895 | NM_052902       | KCNMB2      |
| 8084002 | -0,83 | -1,78 | 0,10879 | -1,45 | -2,73 | 0,00895 | NM_005832       | FOXD4L6     |
| 8161533 | -0,83 | -1,78 | 0,21738 | -1,18 | -2,26 | 0,01053 | NM_001085476    | OR8H2       |
| 7939967 | -0,83 | -1,78 | 0,34595 | -1,29 | -2,45 | 0,01225 | NM_001005200    | ---         |
| 8114203 | -0,83 | -1,78 | 0,19386 | -1,41 | -2,66 | 0,07123 | ---             | TF          |
| 8082797 | -0,83 | -1,78 | 0,08082 | -1,37 | -2,58 | 0,04521 | NM_001063       | RAB3C       |
| 8105487 | -0,83 | -1,78 | 0,09084 | -0,54 | -1,45 | 0,02045 | NM_138453       | PPAN-P2RY11 |
| 8025563 | -0,83 | -1,78 | 0,00181 | -0,12 | -1,08 | 0,53395 | NM_001040664    | KCNJ6       |
| 8070279 | -0,83 | -1,78 | 0,03579 | -0,77 | -1,71 | 0,03332 | NM_002240       | CD22        |
| 8027837 | -0,83 | -1,78 | 0,07896 | -1,07 | -2,09 | 0,03430 | NM_001771       | TRABD       |
| 8074003 | -0,83 | -1,78 | 0,28552 | -0,27 | -1,21 | 0,36708 | NM_025204       | ---         |
| 7933310 | -0,83 | -1,78 | 0,11968 | -0,48 | -1,39 | 0,40061 | ---             | ABCC13      |
| 8067877 | -0,83 | -1,78 | 0,03570 | -1,28 | -2,43 | 0,00332 | NR_003087       | ESPL1       |
| 7955736 | -0,83 | -1,78 | 0,02563 | 1,28  | 2,43  | 0,02596 | NM_012291       | ---         |
| 8099805 | -0,83 | -1,78 | 0,06198 | -0,98 | -1,97 | 0,00430 | ---             | ATP2B3      |
| 8170671 | -0,83 | -1,78 | 0,09976 | -0,44 | -1,35 | 0,06909 | NM_021949       | ---         |
| 8046644 | -0,83 | -1,78 | 0,11683 | -0,50 | -1,41 | 0,05239 | ---             | TMEM63C     |
| 7975932 | -0,83 | -1,78 | 0,00359 | 1,37  | 2,59  | 0,00076 | NM_020431       | CNGA2       |
| 8170520 | -0,83 | -1,78 | 0,20930 | -1,17 | -2,25 | 0,00969 | NM_005140       | CDK18       |
| 7909104 | -0,83 | -1,78 | 0,07159 | -0,11 | -1,08 | 0,89180 | NM_212503       | ---         |
| 7943550 | -0,83 | -1,78 | 0,00070 | -0,66 | -1,58 | 0,00662 | ---             | DES         |

|         |       |       |         |       |       |         |                     |             |
|---------|-------|-------|---------|-------|-------|---------|---------------------|-------------|
| 8048541 | -0,83 | -1,78 | 0,03979 | -1,46 | -2,74 | 0,01001 | NM_001927           | C10orf122   |
| 7936918 | -0,83 | -1,78 | 0,00943 | -0,43 | -1,35 | 0,23469 | NM_001128202        | HTR6        |
| 7898594 | -0,83 | -1,78 | 0,15065 | -1,47 | -2,76 | 0,01740 | NM_000871           | SURF2       |
| 8159008 | -0,83 | -1,78 | 0,07547 | 0,15  | 1,11  | 0,89914 | NM_017503           | C21orf104   |
| 8070328 | -0,83 | -1,78 | 0,17064 | -2,45 | -5,46 | 0,00324 | ENST00000442121     | TMEM187     |
| 8170803 | -0,83 | -1,78 | 0,04336 | 0,22  | 1,17  | 0,15655 | NM_003492           | GPR35       |
| 8049722 | -0,83 | -1,78 | 0,10355 | -1,45 | -2,73 | 0,00274 | NM_005301           | SCARNA23    |
| 8166563 | -0,83 | -1,78 | 0,00374 | -1,11 | -2,15 | 0,02505 | NR_003007           | ---         |
| 7969143 | -0,83 | -1,78 | 0,23394 | -1,38 | -2,61 | 0,02002 | ---                 | hCG_1651160 |
| 7945956 | -0,83 | -1,78 | 0,21605 | -0,93 | -1,90 | 0,01864 | ENST00000421628     | SSH3        |
| 7941843 | -0,83 | -1,78 | 0,24027 | 0,81  | 1,75  | 0,25569 | NM_017857           | SIX2        |
| 8051949 | -0,83 | -1,78 | 0,06202 | -2,11 | -4,33 | 0,01822 | NM_016932           | SNORA27     |
| 7968234 | -0,83 | -1,78 | 0,03342 | -0,86 | -1,82 | 0,01146 | NR_002575           | BAI3        |
| 8120468 | -0,83 | -1,78 | 0,04256 | -0,85 | -1,81 | 0,00428 | NM_001704           | SASH3       |
| 8169859 | -0,83 | -1,78 | 0,04981 | -1,07 | -2,10 | 0,01290 | NM_018990           | PRDM6       |
| 8107646 | -0,83 | -1,78 | 0,08160 | -1,49 | -2,82 | 0,03668 | NM_001136239        | CLSTN2      |
| 8083034 | -0,83 | -1,78 | 0,01405 | -1,42 | -2,67 | 0,01183 | NM_022131           | KRT222      |
| 8015049 | -0,83 | -1,78 | 0,00128 | -0,82 | -1,77 | 0,08547 | NM_152349           | ---         |
| 8000945 | -0,83 | -1,78 | 0,01646 | -0,44 | -1,35 | 0,59504 | ---                 | KRTAP13-3   |
| 8069818 | -0,83 | -1,78 | 0,13242 | -1,34 | -2,53 | 0,04444 | NM_181622           | GSTTP1      |
| 8071801 | -0,83 | -1,78 | 0,22968 | -1,23 | -2,34 | 0,08800 | NR_003081           | LRP11       |
| 8122717 | -0,83 | -1,78 | 0,02547 | -0,89 | -1,85 | 0,11861 | NM_032832           | TMEM121     |
| 7977432 | -0,83 | -1,78 | 0,22201 | -1,24 | -2,36 | 0,08888 | NM_025268           | MIR16-2     |
| 8083739 | -0,83 | -1,78 | 0,07452 | -0,80 | -1,75 | 0,08324 | NR_029525           | ---         |
| 7932983 | -0,83 | -1,78 | 0,11076 | -0,57 | -1,48 | 0,19326 | ---                 | OR52B4      |
| 7945958 | -0,83 | -1,78 | 0,10151 | -1,46 | -2,75 | 0,00166 | NM_001005161        | ACAD9       |
| 8090511 | -0,83 | -1,78 | 0,04605 | -0,84 | -1,78 | 0,17008 | NM_014049           | SELO        |
| 8074020 | -0,83 | -1,78 | 0,06498 | 0,67  | 1,60  | 0,30143 | NM_031454           | ---         |
| 8023373 | -0,83 | -1,78 | 0,02527 | -1,10 | -2,15 | 0,06407 | ---                 | MUTYH       |
| 7915695 | -0,83 | -1,78 | 0,13426 | -0,38 | -1,31 | 0,07396 | NM_012222           | C9orf116    |
| 8165024 | -0,83 | -1,78 | 0,00700 | -0,19 | -1,14 | 0,76946 | NM_001048265        | ZKSCAN4     |
| 8124553 | -0,83 | -1,78 | 0,05454 | 0,67  | 1,59  | 0,05837 | NM_019110           | CYP3A5      |
| 8141328 | -0,83 | -1,78 | 0,13904 | -0,93 | -1,91 | 0,05231 | NM_000777           | TREML2      |
| 8126288 | -0,84 | -1,78 | 0,09783 | -1,30 | -2,46 | 0,01686 | NM_024807           | KLHL25      |
| 7991173 | -0,84 | -1,78 | 0,04688 | -0,67 | -1,59 | 0,01449 | NM_022480           | FLJ10213    |
| 8080980 | -0,84 | -1,78 | 0,15271 | -0,87 | -1,83 | 0,00045 | NM_018029           | INF2        |
| 7977241 | -0,84 | -1,78 | 0,07332 | 1,85  | 3,60  | 0,05667 | NM_022489           | RAD21L1     |
| 8060400 | -0,84 | -1,78 | 0,02105 | -0,90 | -1,87 | 0,04013 | NM_001136566        | ---         |
| 8161852 | -0,84 | -1,78 | 0,16141 | -0,42 | -1,34 | 0,22601 | ---                 | ---         |
| 8088472 | -0,84 | -1,78 | 0,05495 | -1,15 | -2,22 | 0,00144 | ---                 | ---         |
| 8122194 | -0,84 | -1,78 | 0,26401 | -0,19 | -1,14 | 0,40136 | ---                 | TBC1D10C    |
| 7941879 | -0,84 | -1,78 | 0,05399 | -0,94 | -1,91 | 0,02637 | NM_198517           | CASP5       |
| 7951385 | -0,84 | -1,78 | 0,04160 | -0,39 | -1,31 | 0,34246 | NM_004347           | TTC39A      |
| 7916024 | -0,84 | -1,78 | 0,01193 | 1,72  | 3,28  | 0,00344 | NM_001144832        | ---         |
| 7922293 | -0,84 | -1,78 | 0,12761 | -1,62 | -3,08 | 0,00160 | ---                 | INSIG2      |
| 8044766 | -0,84 | -1,78 | 0,14908 | 0,38  | 1,30  | 0,18158 | NM_016133           | FANCG       |
| 8160935 | -0,84 | -1,79 | 0,02233 | 0,89  | 1,85  | 0,02267 | NM_004629           | ANKRD20B    |
| 8053744 | -0,84 | -1,79 | 0,13168 | -0,98 | -1,97 | 0,07107 | NR_003366           | SELE        |
| 7922229 | -0,84 | -1,79 | 0,03822 | -0,83 | -1,78 | 0,04165 | NM_000450           | DAPK2       |
| 7989596 | -0,84 | -1,79 | 0,01859 | -0,94 | -1,92 | 0,00383 | NM_014326           | PSORS1C1    |
| 8118076 | -0,84 | -1,79 | 0,02164 | 0,66  | 1,58  | 0,19799 | NM_014068           | PIPSL       |
| 7935139 | -0,84 | -1,79 | 0,31876 | 0,22  | 1,17  | 0,04113 | NR_002319           | SUGT1L1     |
| 7971191 | -0,84 | -1,79 | 0,05125 | -0,59 | -1,50 | 0,29455 | NR_003365           | BMP7        |
| 8067185 | -0,84 | -1,79 | 0,12375 | 0,32  | 1,24  | 0,11857 | NM_001719           | SERPINA7    |
| 8174304 | -0,84 | -1,79 | 0,07950 | -0,86 | -1,82 | 0,03903 | NM_000354           | UBE2K       |
| 8099918 | -0,84 | -1,79 | 0,23566 | -1,03 | -2,04 | 0,04839 | AK291454 LOC646508  | ---         |
| 8030974 | -0,84 | -1,79 | 0,24961 | -0,99 | -1,99 | 0,00074 | ENST00000338885     | TRIM69      |
| 7983365 | -0,84 | -1,79 | 0,08777 | -0,44 | -1,35 | 0,09764 | NM_182985           | MIR153-2    |
| 8144149 | -0,84 | -1,79 | 0,07139 | -1,20 | -2,30 | 0,02514 | NR_029689           | TMPRSS3     |
| 8070584 | -0,84 | -1,79 | 0,02841 | -0,47 | -1,39 | 0,03974 | NM_024022           | LOC338579   |
| 7927207 | -0,84 | -1,79 | 0,00568 | -1,10 | -2,14 | 0,01265 | AK098688 NCRNA00052 | ---         |
| 7985752 | -0,84 | -1,79 | 0,12001 | -1,90 | -3,74 | 0,00128 | NR_026869           | TAC4        |
| 8016600 | -0,84 | -1,79 | 0,29090 | -1,38 | -2,59 | 0,00306 | NM_170685           | MAMSTR      |
| 8038150 | -0,84 | -1,79 | 0,15082 | -1,83 | -3,56 | 0,00031 | NM_182574           | HEPACAM     |
| 7944911 | -0,84 | -1,79 | 0,04347 | -0,51 | -1,42 | 0,02859 | NM_152722           | GGT1        |
| 8071927 | -0,84 | -1,79 | 0,00452 | -0,98 | -1,98 | 0,07258 | NM_005265           | ---         |
| 8043433 | -0,84 | -1,79 | 0,39727 | -2,62 | -6,14 | 0,00000 | ---                 | RELB        |
| 8029580 | -0,84 | -1,79 | 0,15632 | -0,47 | -1,39 | 0,10238 | NM_006509           | ---         |
| 8123338 | -0,84 | -1,79 | 0,00953 | -0,98 | -1,97 | 0,01088 | ---                 | SP8         |
| 8138474 | -0,84 | -1,79 | 0,10636 | -1,47 | -2,77 | 0,00176 | NM_198956           | SNORA15     |
| 8132962 | -0,84 | -1,79 | 0,22245 | -1,23 | -2,35 | 0,00705 | NR_002957           | C5orf52     |
| 8109572 | -0,84 | -1,79 | 0,14985 | -0,80 | -1,74 | 0,14386 | NM_001145132        | FAM5C       |
| 7922994 | -0,84 | -1,79 | 0,09545 | -1,20 | -2,30 | 0,00447 | NM_199051           | PWWP2B      |

|         |       |       |         |       |       |         |              |            |
|---------|-------|-------|---------|-------|-------|---------|--------------|------------|
| 7931469 | -0,84 | -1,79 | 0,04356 | -0,63 | -1,55 | 0,01154 | NM_138499    | ---        |
| 8169156 | -0,84 | -1,79 | 0,21738 | -2,16 | -4,47 | 0,02983 | ---          | C1orf141   |
| 7916822 | -0,84 | -1,79 | 0,05370 | -1,19 | -2,28 | 0,01343 | BC047053     | GPR31      |
| 8130785 | -0,84 | -1,79 | 0,02267 | -1,81 | -3,51 | 0,00050 | NM_005299    | XKR7       |
| 8061647 | -0,84 | -1,79 | 0,12115 | -1,00 | -1,99 | 0,12351 | NM_001011718 | LSP1       |
| 7937735 | -0,84 | -1,79 | 0,00797 | -0,95 | -1,93 | 0,03419 | NM_002339    | ---        |
| 7978536 | -0,84 | -1,79 | 0,12628 | -1,27 | -2,42 | 0,01054 | ---          | SLC32A1    |
| 8062539 | -0,84 | -1,79 | 0,02058 | -1,23 | -2,34 | 0,00606 | NM_080552    | PREX1      |
| 8066848 | -0,84 | -1,79 | 0,03333 | 0,32  | 1,25  | 0,45788 | NM_020820    | C13orf35   |
| 7970158 | -0,84 | -1,79 | 0,12174 | -1,69 | -3,22 | 0,00100 | NM_207440    | ---        |
| 8100095 | -0,84 | -1,79 | 0,08754 | -1,05 | -2,07 | 0,00745 | ---          | CORO1B     |
| 7949776 | -0,84 | -1,79 | 0,05233 | 0,12  | 1,09  | 0,72238 | NM_020441    | FLJ40852   |
| 8143448 | -0,84 | -1,79 | 0,09383 | -0,78 | -1,72 | 0,05622 | NR_015392    | ---        |
| 8133500 | -0,84 | -1,79 | 0,09460 | -1,41 | -2,65 | 0,02135 | ---          | KRTAP20-1  |
| 8068154 | -0,84 | -1,79 | 0,26524 | -0,79 | -1,72 | 0,01160 | NM_181615    | ---        |
| 7999560 | -0,84 | -1,79 | 0,00887 | -1,50 | -2,82 | 0,00986 | ---          | KNDC1      |
| 7931519 | -0,84 | -1,79 | 0,00776 | -0,26 | -1,19 | 0,52810 | NM_152643    | ---        |
| 8114548 | -0,84 | -1,79 | 0,09521 | -1,69 | -3,24 | 0,05988 | ---          | ---        |
| 8141281 | -0,84 | -1,79 | 0,06633 | -0,91 | -1,88 | 0,03200 | ---          | ---        |
| 7926205 | -0,84 | -1,79 | 0,01733 | -1,19 | -2,28 | 0,00327 | ---          | GFRA1      |
| 7936494 | -0,84 | -1,79 | 0,34100 | -1,35 | -2,55 | 0,00012 | NM_005264    | SYCP3      |
| 7965800 | -0,84 | -1,79 | 0,04021 | -1,13 | -2,19 | 0,00386 | NM_001177949 | NOL6       |
| 8160682 | -0,84 | -1,79 | 0,00121 | 1,72  | 3,30  | 0,00729 | NM_022917    | ---        |
| 8143205 | -0,84 | -1,79 | 0,10408 | -1,31 | -2,48 | 0,01430 | ---          | CRB1       |
| 7908508 | -0,84 | -1,79 | 0,00021 | -0,56 | -1,47 | 0,04782 | NM_201253    | ---        |
| 8053404 | -0,84 | -1,79 | 0,02263 | -1,82 | -3,52 | 0,01088 | ---          | ---        |
| 7977474 | -0,84 | -1,79 | 0,13730 | -1,66 | -3,15 | 0,02361 | ---          | IL1RN      |
| 8044574 | -0,84 | -1,79 | 0,13462 | -1,06 | -2,09 | 0,01023 | NM_173842    | GP1BB      |
| 8071274 | -0,84 | -1,79 | 0,68528 | -1,58 | -3,00 | 0,35150 | L20860       | SLC5A9     |
| 7901316 | -0,84 | -1,79 | 0,13237 | -1,35 | -2,55 | 0,02730 | NM_001135181 | ---        |
| 8092883 | -0,84 | -1,79 | 0,28888 | -1,16 | -2,24 | 0,11236 | ---          | SIM1       |
| 8128459 | -0,84 | -1,79 | 0,01864 | -1,54 | -2,91 | 0,00083 | NM_005068    | GOLGA6A    |
| 7990283 | -0,84 | -1,79 | 0,25447 | -1,04 | -2,05 | 0,00731 | NM_001038640 | RGS1       |
| 7908388 | -0,84 | -1,79 | 0,00543 | -1,02 | -2,03 | 0,02377 | NM_002922    | ---        |
| 7960357 | -0,84 | -1,79 | 0,32541 | 0,26  | 1,20  | 0,32121 | ---          | SNORD115-7 |
| 7982020 | -0,84 | -1,79 | 0,06182 | -1,79 | -3,45 | 0,00267 | NR_003299    | NRG3       |
| 7928736 | -0,84 | -1,79 | 0,12842 | -1,18 | -2,26 | 0,00349 | NM_001010848 | GLYATL2    |
| 7948354 | -0,84 | -1,79 | 0,00134 | -1,43 | -2,70 | 0,01599 | NM_145016    | ST18       |
| 8150722 | -0,84 | -1,79 | 0,27149 | -1,27 | -2,41 | 0,00883 | NM_014682    | BLM        |
| 7986068 | -0,84 | -1,79 | 0,02602 | 2,51  | 5,69  | 0,00239 | NM_000057    | CD101      |
| 7904303 | -0,84 | -1,79 | 0,11199 | -1,09 | -2,13 | 0,02672 | NM_004258    | 11. Mrz    |
| 8111127 | -0,84 | -1,79 | 0,02373 | -0,17 | -1,13 | 0,45286 | NM_001102562 | TTC39C     |
| 8020647 | -0,84 | -1,79 | 0,10011 | 0,35  | 1,28  | 0,48224 | NR_024232    | MPP3       |
| 8015846 | -0,84 | -1,79 | 0,03220 | 1,04  | 2,06  | 0,16446 | NM_001932    | SSX1       |
| 8167254 | -0,84 | -1,79 | 0,10686 | -1,16 | -2,23 | 0,01307 | NM_005635    | RNF17      |
| 7968085 | -0,84 | -1,79 | 0,00969 | -0,90 | -1,87 | 0,00007 | NM_031277    | ---        |
| 8031615 | -0,84 | -1,79 | 0,09203 | -1,65 | -3,13 | 0,00179 | ---          | MRGPRX2    |
| 7947096 | -0,84 | -1,79 | 0,06543 | -0,33 | -1,26 | 0,38490 | NM_054030    | FUZ        |
| 8038443 | -0,84 | -1,79 | 0,14939 | -0,59 | -1,51 | 0,10925 | NM_025129    | ZNF674     |
| 8172274 | -0,84 | -1,79 | 0,13790 | -0,32 | -1,25 | 0,42435 | NM_001039891 | ---        |
| 7986534 | -0,84 | -1,79 | 0,04975 | -1,40 | -2,64 | 0,04791 | ---          | ---        |
| 8113701 | -0,84 | -1,79 | 0,14317 | -0,55 | -1,47 | 0,21235 | ---          | MIR485     |
| 7976846 | -0,84 | -1,79 | 0,03501 | -1,23 | -2,35 | 0,07342 | NR_030160    | ---        |
| 8066960 | -0,84 | -1,79 | 0,13885 | -0,64 | -1,56 | 0,05660 | ---          | IL19       |
| 7909250 | -0,84 | -1,79 | 0,05635 | -1,23 | -2,35 | 0,00420 | NM_153758    | CHD5       |
| 7911941 | -0,84 | -1,79 | 0,14964 | -1,02 | -2,03 | 0,02771 | NM_015557    | CD274      |
| 8154233 | -0,84 | -1,79 | 0,16737 | -0,03 | -1,02 | 0,93396 | NM_014143    | ACTR5      |
| 8062545 | -0,84 | -1,79 | 0,01703 | 2,09  | 4,26  | 0,00100 | NM_024855    | ENKUR      |
| 7932598 | -0,84 | -1,79 | 0,16506 | -1,05 | -2,06 | 0,04282 | NM_145010    | AQP2       |
| 7955290 | -0,84 | -1,79 | 0,06869 | -1,75 | -3,37 | 0,02614 | NM_000486    | ---        |
| 8122803 | -0,84 | -1,79 | 0,03239 | -0,57 | -1,49 | 0,10076 | ---          | ---        |
| 7924325 | -0,84 | -1,79 | 0,09349 | -0,75 | -1,68 | 0,06480 | ---          | FSIP2      |
| 8046833 | -0,84 | -1,79 | 0,06685 | -0,60 | -1,51 | 0,24968 | AK126104     | CCL16      |
| 8014342 | -0,84 | -1,79 | 0,00220 | -0,40 | -1,32 | 0,37641 | NM_004590    | GIP        |
| 8016523 | -0,84 | -1,79 | 0,04625 | -0,95 | -1,94 | 0,03228 | NM_004123    | ---        |
| 7951591 | -0,84 | -1,79 | 0,11260 | -0,46 | -1,38 | 0,13237 | ---          | LRP2       |
| 8056611 | -0,84 | -1,79 | 0,05052 | -1,19 | -2,28 | 0,00230 | NM_004525    | LOC150527  |
| 8045205 | -0,84 | -1,79 | 0,06003 | -1,36 | -2,56 | 0,07776 | NR_027313    | LOC150527  |
| 8055236 | -0,84 | -1,79 | 0,06003 | -1,36 | -2,56 | 0,07776 | NR_027313    | SNORD30    |
| 7948900 | -0,84 | -1,79 | 0,13336 | -0,90 | -1,87 | 0,02265 | NR_002561    | ---        |
| 8097790 | -0,84 | -1,79 | 0,05777 | -1,01 | -2,01 | 0,02270 | ---          | ---        |
| 7944516 | -0,84 | -1,79 | 0,16626 | -1,34 | -2,53 | 0,07007 | ---          | MIR128-2   |
| 8078527 | -0,84 | -1,79 | 0,02777 | -1,43 | -2,69 | 0,05718 | NR_029824    | NR112      |



|         |       |       |         |       |       |         |                        |                    |
|---------|-------|-------|---------|-------|-------|---------|------------------------|--------------------|
| 8081925 | -0,84 | -1,79 | 0,00123 | -1,41 | -2,65 | 0,00082 | NM_003889              | SLFNL1             |
| 7915351 | -0,84 | -1,79 | 0,09161 | -0,71 | -1,63 | 0,07289 | NM_001168247           | ADCY5              |
| 8090070 | -0,84 | -1,79 | 0,03908 | -0,89 | -1,86 | 0,12726 | NM_183357              | CATSPERB           |
| 7980861 | -0,84 | -1,79 | 0,08075 | -0,50 | -1,41 | 0,00118 | NM_024764              | LOC440563          |
| 7912580 | -0,84 | -1,79 | 0,13403 | -1,04 | -2,06 | 0,03084 | NM_001136561           | GOLGA6L5           |
| 7991110 | -0,84 | -1,79 | 0,46927 | -0,23 | -1,17 | 0,63235 | NR_003246              | CCDC115            |
| 8055208 | -0,84 | -1,79 | 0,00886 | -0,79 | -1,73 | 0,08031 | NM_032357              | SUMO1P3            |
| 7906574 | -0,84 | -1,79 | 0,25806 | -0,44 | -1,35 | 0,27921 | NR_002190              | ALDH4A1            |
| 7912975 | -0,84 | -1,79 | 0,02022 | -0,30 | -1,23 | 0,29294 | NM_003748              | CDC42BPG           |
| 7949227 | -0,84 | -1,79 | 0,05098 | -0,67 | -1,59 | 0,10616 | NM_017525              | FAM184A            |
| 8129231 | -0,84 | -1,79 | 0,03066 | -0,54 | -1,46 | 0,00467 | NM_024581              | ---                |
| 8050236 | -0,84 | -1,79 | 0,06617 | -0,87 | -1,83 | 0,09506 | ---                    | ---                |
| 8081941 | -0,84 | -1,79 | 0,15186 | -0,95 | -1,94 | 0,05836 | ---                    | MIR487A            |
| 7976840 | -0,84 | -1,79 | 0,16171 | -0,65 | -1,56 | 0,00304 | NR_030162              | EPB49              |
| 8145005 | -0,84 | -1,79 | 0,03565 | 1,09  | 2,13  | 0,03646 | NM_001978              | DPPA2              |
| 8089438 | -0,84 | -1,79 | 0,08804 | -0,36 | -1,28 | 0,00173 | NM_138815              | OTOL1              |
| 8083770 | -0,84 | -1,79 | 0,14422 | -0,77 | -1,71 | 0,15706 | NM_001080440           | PAR4               |
| 7982052 | -0,84 | -1,79 | 0,00649 | -0,89 | -1,86 | 0,01413 | NR_022010              | EME1               |
| 8008310 | -0,84 | -1,79 | 0,04395 | -0,30 | -1,23 | 0,24333 | NM_001166131           | C10orf79           |
| 7936201 | -0,84 | -1,79 | 0,08126 | -0,30 | -1,23 | 0,23007 | NM_025145              | ---                |
| 8168687 | -0,84 | -1,79 | 0,14991 | -0,70 | -1,62 | 0,20896 | ---                    | PTPRT              |
| 8066347 | -0,84 | -1,80 | 0,11625 | -1,25 | -2,38 | 0,00084 | NM_133170              | ---                |
| 7901416 | -0,84 | -1,80 | 0,02058 | -1,03 | -2,04 | 0,07873 | ---                    | ---                |
| 8069444 | -0,84 | -1,80 | 0,20574 | -0,86 | -1,82 | 0,09168 | ---                    | ---                |
| 7946029 | -0,84 | -1,80 | 0,11303 | -0,96 | -1,95 | 0,04369 | ---                    | ---                |
| 7980477 | -0,84 | -1,80 | 0,42668 | -2,03 | -4,10 | 0,05638 | ---                    | ---                |
| 8121557 | -0,84 | -1,80 | 0,04121 | -1,50 | -2,83 | 0,00556 | ---                    | NKAIN2             |
| 8121814 | -0,84 | -1,80 | 0,23108 | -0,44 | -1,36 | 0,14900 | NM_001040214           | LRFN4              |
| 7941743 | -0,84 | -1,80 | 0,24222 | -0,67 | -1,60 | 0,10181 | NM_024036              | PNLIPRP3           |
| 7930760 | -0,84 | -1,80 | 0,10171 | -1,12 | -2,17 | 0,00709 | NM_001011709           | RASGEF1C           |
| 8116384 | -0,84 | -1,80 | 0,00851 | -0,52 | -1,43 | 0,13762 | NM_175062              | ARX                |
| 8171867 | -0,84 | -1,80 | 0,03797 | -1,62 | -3,07 | 0,00439 | NM_139058              | AQP8               |
| 7994252 | -0,84 | -1,80 | 0,19188 | -1,17 | -2,25 | 0,07507 | NM_001169              | VAC14              |
| 8002444 | -0,84 | -1,80 | 0,00661 | -0,51 | -1,42 | 0,11575 | AK128439               | ---                |
| 8168672 | -0,84 | -1,80 | 0,05921 | -1,36 | -2,57 | 0,01221 | ---                    | C11orf72           |
| 7949851 | -0,84 | -1,80 | 0,10782 | -1,49 | -2,80 | 0,00089 | AK075315               | NOG                |
| 8008627 | -0,85 | -1,80 | 0,01104 | -1,49 | -2,81 | 0,00324 | NM_005450              | ---                |
| 8110585 | -0,85 | -1,80 | 0,22702 | -1,64 | -3,12 | 0,00020 | ---                    | MGC5590            |
| 7971345 | -0,85 | -1,80 | 0,03569 | -0,56 | -1,47 | 0,11838 | ENST00000400419        | OR2A1              |
| 8136985 | -0,85 | -1,80 | 0,17032 | -0,74 | -1,67 | 0,02717 | NM_001005287           | GJA5               |
| 7919340 | -0,85 | -1,80 | 0,09094 | -1,35 | -2,56 | 0,02869 | NM_005266              | VTCN1              |
| 7918936 | -0,85 | -1,80 | 0,00768 | -1,09 | -2,13 | 0,08825 | NM_024626              | ---                |
| 8156450 | -0,85 | -1,80 | 0,10711 | -1,28 | -2,43 | 0,01327 | ---                    | C3orf56            |
| 8082347 | -0,85 | -1,80 | 0,08418 | -1,28 | -2,44 | 0,00051 | BC137154               | LOC387720          |
| 7937014 | -0,85 | -1,80 | 0,09250 | -1,59 | -3,00 | 0,07184 | AK127642               | GALR1              |
| 8021818 | -0,85 | -1,80 | 0,03210 | -1,37 | -2,59 | 0,03123 | NM_001480              | ---                |
| 7901714 | -0,85 | -1,80 | 0,02313 | -0,73 | -1,66 | 0,04256 | ---                    | KRTAP23-1          |
| 8069811 | -0,85 | -1,80 | 0,20177 | -1,51 | -2,84 | 0,00570 | NM_181624              | HES1               |
| 8084880 | -0,85 | -1,80 | 0,06098 | 0,78  | 1,72  | 0,06357 | NM_005524              | MORC1              |
| 8089407 | -0,85 | -1,80 | 0,07120 | -0,92 | -1,90 | 0,00927 | NM_014429              | ---                |
| 8094774 | -0,85 | -1,80 | 0,04292 | -1,07 | -2,10 | 0,02528 | ---                    | ---                |
| 8096554 | -0,85 | -1,80 | 0,08425 | -0,71 | -1,64 | 0,07335 | ---                    | NCRNA00087         |
| 8175308 | -0,85 | -1,80 | 0,02259 | -0,94 | -1,92 | 0,07321 | NR_024493              | OR5A2              |
| 7948377 | -0,85 | -1,80 | 0,20334 | -0,48 | -1,39 | 0,08003 | NM_001001954           | CSPG4PY1           |
| 8176923 | -0,85 | -1,80 | 0,04802 | -0,27 | -1,21 | 0,08052 | NR_001554              | CSPG4PY1           |
| 8177410 | -0,85 | -1,80 | 0,04802 | -0,27 | -1,21 | 0,08052 | NR_001554              | USP17L2 // USP17L2 |
| 8149243 | -0,85 | -1,80 | 0,52679 | -2,55 | -5,86 | 0,00047 | NM_201402 // NM_201402 | AADA4L4            |
| 7897955 | -0,85 | -1,80 | 0,09672 | -1,76 | -3,38 | 0,00521 | NM_001013630           | ---                |
| 8130701 | -0,85 | -1,80 | 0,00213 | -1,38 | -2,60 | 0,00039 | ---                    | ---                |
| 7943156 | -0,85 | -1,80 | 0,02611 | -1,99 | -3,98 | 0,00615 | ---                    | ---                |
| 8043129 | -0,85 | -1,80 | 0,08630 | -1,11 | -2,16 | 0,00634 | ---                    | REM1               |
| 8061529 | -0,85 | -1,80 | 0,16550 | -1,29 | -2,44 | 0,03011 | NM_014012              | IRX6               |
| 7995674 | -0,85 | -1,80 | 0,12199 | -1,42 | -2,68 | 0,03975 | NM_024335              | TIMELESS           |
| 7964145 | -0,85 | -1,80 | 0,00215 | 2,05  | 4,15  | 0,00104 | NM_003920              | SLC13A1            |
| 8142628 | -0,85 | -1,80 | 0,08435 | -1,17 | -2,25 | 0,04546 | NM_022444              | FLJ36000           |
| 8005743 | -0,85 | -1,80 | 0,01065 | -1,33 | -2,52 | 0,00003 | NR_027084              | ---                |
| 7996917 | -0,85 | -1,80 | 0,03542 | -1,37 | -2,58 | 0,24268 | ---                    | ZNF385B            |
| 8057418 | -0,85 | -1,80 | 0,00556 | -0,21 | -1,15 | 0,45343 | NM_152520              | ---                |
| 8084213 | -0,85 | -1,80 | 0,04568 | -1,97 | -3,92 | 0,01206 | ---                    | ---                |
| 8022801 | -0,85 | -1,80 | 0,00582 | -1,06 | -2,09 | 0,00405 | ---                    | SUSD3              |
| 8156393 | -0,85 | -1,80 | 0,03039 | -0,57 | -1,49 | 0,06136 | NM_145006              | ---                |
| 8150868 | -0,85 | -1,80 | 0,02670 | -1,28 | -2,43 | 0,02133 | ---                    | ---                |
| 8121561 | -0,85 | -1,80 | 0,00128 | -0,51 | -1,43 | 0,06672 | ---                    | MAGEB10            |

|          |       |       |         |       |        |         |                 |              |
|----------|-------|-------|---------|-------|--------|---------|-----------------|--------------|
| 8166587  | -0,85 | -1,80 | 0,07122 | -0,94 | -1,92  | 0,02008 | NM_182506       | ---          |
| 8112801  | -0,85 | -1,80 | 0,16372 | -0,35 | -1,28  | 0,03209 | ---             | PIP          |
| 8136839  | -0,85 | -1,80 | 0,14000 | -1,22 | -2,32  | 0,01771 | NM_002652       | SERPINB10    |
| 8021645  | -0,85 | -1,80 | 0,00222 | -0,86 | -1,81  | 0,00245 | NM_005024       | COL4A5       |
| 8169294  | -0,85 | -1,80 | 0,07894 | -0,64 | -1,56  | 0,04728 | NM_000495       | TRIM39       |
| 8117869  | -0,85 | -1,80 | 0,00307 | 1,08  | 2,12   | 0,00594 | NM_172016       | TRIM39       |
| 8177770  | -0,85 | -1,80 | 0,00307 | 1,08  | 2,12   | 0,00594 | NM_172016       | TRIM39       |
| 8179088  | -0,85 | -1,80 | 0,00307 | 1,08  | 2,12   | 0,00594 | NM_172016       | AQP7P1       |
| 8155442  | -0,85 | -1,80 | 0,18041 | -2,07 | -4,19  | 0,00347 | NR_002817       | ---          |
| 8113936  | -0,85 | -1,80 | 0,19101 | -1,20 | -2,30  | 0,09838 | ---             | ---          |
| 8027746  | -0,85 | -1,80 | 0,23794 | 0,08  | 1,06   | 0,78940 | ---             | C11orf71     |
| 7951781  | -0,85 | -1,80 | 0,11512 | 0,43  | 1,35   | 0,09197 | BC071695        | C16orf59     |
| 7992614  | -0,85 | -1,80 | 0,15834 | -0,89 | -1,85  | 0,00628 | NM_025108       | ---          |
| 8121140  | -0,85 | -1,80 | 0,23077 | -0,90 | -1,86  | 0,11495 | ---             | LOC441426    |
| 8155455  | -0,85 | -1,80 | 0,52731 | -3,66 | -12,64 | 0,00021 | AK126863        | ACSBG1       |
| 7990683  | -0,85 | -1,80 | 0,00822 | -0,85 | -1,80  | 0,00543 | NM_015162       | FAM75C1 //   |
| FAM75C1  |       |       |         |       |        |         |                 |              |
| 8156257  | -0,85 | -1,80 | 0,12322 | -2,07 | -4,21  | 0,00975 | NM_001145124 // | NM_001145124 |
| FLJ31713 |       |       |         |       |        |         |                 |              |
| 8163533  | -0,85 | -1,80 | 0,15728 | -0,87 | -1,82  | 0,08400 | AK056275        | ---          |
| 8103559  | -0,85 | -1,80 | 0,04108 | -0,74 | -1,67  | 0,01366 | ---             | L3MBTL2      |
| 8073379  | -0,85 | -1,80 | 0,01609 | 0,64  | 1,56   | 0,02652 | NM_031488       | ---          |
| 7922684  | -0,85 | -1,80 | 0,20726 | -2,66 | -6,31  | 0,00285 | ---             | ---          |
| 8118611  | -0,85 | -1,80 | 0,26365 | -1,69 | -3,22  | 0,02677 | ---             | LOC643406    |
| 8060792  | -0,85 | -1,80 | 0,16860 | -0,59 | -1,50  | 0,01651 | NR_029405       | ---          |
| 8021683  | -0,85 | -1,80 | 0,00938 | -0,55 | -1,47  | 0,00175 | ---             | PZP          |
| 7960984  | -0,85 | -1,80 | 0,04698 | -0,95 | -1,93  | 0,00061 | NM_002864       | SFI1         |
| 8072494  | -0,85 | -1,80 | 0,01927 | -0,78 | -1,72  | 0,04630 | NM_001007467    | TMPRSS6      |
| 8075865  | -0,85 | -1,80 | 0,02049 | -1,56 | -2,95  | 0,00019 | NM_153609       | LOC100128922 |
| 7915951  | -0,85 | -1,80 | 0,01721 | -0,81 | -1,75  | 0,00293 | AF251047        | RASGRF1      |
| 7985233  | -0,85 | -1,80 | 0,05973 | -0,72 | -1,65  | 0,12403 | NM_002891       | ---          |
| 8150195  | -0,85 | -1,80 | 0,03231 | -1,51 | -2,85  | 0,00720 | ---             | BTNL8        |
| 8110606  | -0,85 | -1,80 | 0,03300 | -1,55 | -2,93  | 0,00021 | NM_024850       | HIST1H2AG    |
| 8117535  | -0,85 | -1,80 | 0,01244 | 0,83  | 1,78   | 0,22019 | NM_021064       | SLC26A1      |
| 8098848  | -0,85 | -1,80 | 0,11470 | -1,41 | -2,66  | 0,02655 | NM_213613       | ---          |
| 7970622  | -0,85 | -1,80 | 0,00195 | -1,29 | -2,45  | 0,00049 | ---             | ---          |
| 7971996  | -0,85 | -1,80 | 0,25262 | -1,28 | -2,43  | 0,03636 | ---             | KIAA1409     |
| 7976350  | -0,85 | -1,80 | 0,00301 | -1,01 | -2,02  | 0,02473 | NM_020818       | ANKRD54      |
| 8075971  | -0,85 | -1,80 | 0,11602 | -0,12 | -1,08  | 0,84535 | NM_138797       | UPK3B        |
| 8133741  | -0,85 | -1,80 | 0,14057 | -0,39 | -1,31  | 0,51396 | NM_030570       | ---          |
| 8128888  | -0,85 | -1,80 | 0,12463 | -1,19 | -2,28  | 0,00479 | ---             | INPP4B       |
| 8097568  | -0,85 | -1,80 | 0,00850 | -1,27 | -2,42  | 0,00002 | NM_003866       | ---          |
| 8171491  | -0,85 | -1,80 | 0,05822 | -1,65 | -3,14  | 0,02038 | ---             | TRPC7        |
| 8114273  | -0,85 | -1,80 | 0,24229 | -1,24 | -2,36  | 0,00279 | NM_020389       | CELA3A       |
| 7898725  | -0,85 | -1,80 | 0,04228 | -1,64 | -3,12  | 0,04845 | NM_005747       | TTR          |
| 8020795  | -0,85 | -1,80 | 0,22575 | -1,62 | -3,07  | 0,00081 | NM_000371       | IL2RB        |
| 8075886  | -0,85 | -1,80 | 0,10384 | -0,13 | -1,09  | 0,78574 | NM_000878       | MAP6D1       |
| 8092404  | -0,85 | -1,80 | 0,05670 | -0,85 | -1,80  | 0,03452 | NM_024871       | ---          |
| 8083939  | -0,85 | -1,80 | 0,01071 | -0,85 | -1,80  | 0,00971 | ---             | C1QC         |
| 7898799  | -0,85 | -1,80 | 0,02996 | -2,16 | -4,46  | 0,00020 | NM_001114101    | ZBED3        |
| 8112740  | -0,85 | -1,80 | 0,11775 | -0,11 | -1,08  | 0,85658 | NM_032367       | ---          |
| 7944970  | -0,85 | -1,80 | 0,50361 | -0,78 | -1,72  | 0,11822 | ---             | ABHD4        |
| 7977780  | -0,85 | -1,80 | 0,46186 | -1,16 | -2,23  | 0,02982 | NM_022060       | ---          |
| 7908730  | -0,85 | -1,80 | 0,20772 | -1,10 | -2,14  | 0,00031 | ---             | PRF1         |
| 7934161  | -0,85 | -1,81 | 0,11087 | -2,10 | -4,29  | 0,01016 | NM_005041       | PRKAG3       |
| 8058997  | -0,85 | -1,81 | 0,08283 | -0,79 | -1,73  | 0,08141 | NM_017431       | ---          |
| 8053325  | -0,85 | -1,81 | 0,22826 | 3,26  | 9,56   | 0,00050 | ---             | ---          |
| 7990031  | -0,85 | -1,81 | 0,05327 | -1,04 | -2,05  | 0,00994 | ---             | CPB1         |
| 8083246  | -0,85 | -1,81 | 0,19058 | -0,72 | -1,65  | 0,00436 | NM_001871       | SCNN1D       |
| 7896882  | -0,85 | -1,81 | 0,05453 | -1,00 | -2,00  | 0,03021 | NM_001130413    | ---          |
| 8171533  | -0,85 | -1,81 | 0,03364 | -1,09 | -2,13  | 0,00206 | ---             | DEFB136      |
| 8149347  | -0,85 | -1,81 | 0,02516 | -1,58 | -2,99  | 0,00403 | NM_001033018    | C10orf99     |
| 7928766  | -0,85 | -1,81 | 0,11094 | -1,41 | -2,66  | 0,05408 | NM_207373       | OR10A5       |
| 7938172  | -0,85 | -1,81 | 0,19952 | -0,94 | -1,93  | 0,03404 | NM_178168       | STAC3        |
| 7964400  | -0,85 | -1,81 | 0,02034 | -0,14 | -1,10  | 0,59770 | NM_145064       | ---          |
| 8058460  | -0,85 | -1,81 | 0,06996 | -1,76 | -3,38  | 0,00070 | ---             | MBOAT4       |
| 8150099  | -0,85 | -1,81 | 0,03598 | -0,48 | -1,39  | 0,09563 | NM_001100916    | RNASE11      |
| 7977598  | -0,85 | -1,81 | 0,02447 | -0,50 | -1,41  | 0,00277 | NM_145250       | ---          |
| 8014071  | -0,85 | -1,81 | 0,02726 | -1,67 | -3,18  | 0,02118 | ---             | MUC3B        |
| 8135015  | -0,85 | -1,81 | 0,17641 | -0,68 | -1,60  | 0,16514 | AB038783        | IL17D        |
| 7967969  | -0,85 | -1,81 | 0,24196 | -0,83 | -1,78  | 0,02608 | NM_138284       | GPR97        |
| 7996100  | -0,85 | -1,81 | 0,02039 | -1,54 | -2,91  | 0,00463 | NM_170776       | CCND1        |
| 7950012  | -0,85 | -1,81 | 0,02655 | -0,58 | -1,50  | 0,07777 | NM_053056       | GAGE12C      |

|         |       |       |         |       |       |         |                        |                |
|---------|-------|-------|---------|-------|-------|---------|------------------------|----------------|
| 8167482 | -0,85 | -1,81 | 0,45675 | -1,95 | -3,86 | 0,01458 | NM_001098408           | GAGE12C        |
| 8167562 | -0,85 | -1,81 | 0,45675 | -1,95 | -3,86 | 0,01458 | NM_001098408           | RELL2          |
| 8108822 | -0,85 | -1,81 | 0,12127 | -0,78 | -1,72 | 0,01094 | NM_173828              | SNAP25         |
| 8060963 | -0,85 | -1,81 | 0,00724 | 0,20  | 1,15  | 0,67073 | NM_003081              | SLC1A7         |
| 7916248 | -0,85 | -1,81 | 0,02405 | -0,35 | -1,27 | 0,11038 | NM_006671              | DEFB115        |
| 8061504 | -0,85 | -1,81 | 0,04535 | -1,17 | -2,25 | 0,00929 | NM_001037730           | ---            |
| 7912527 | -0,85 | -1,81 | 0,23398 | -0,59 | -1,50 | 0,12200 | ---                    | ---            |
| 8111269 | -0,85 | -1,81 | 0,06437 | -1,18 | -2,26 | 0,01810 | ---                    | CSRNP3         |
| 8046048 | -0,85 | -1,81 | 0,03344 | -0,40 | -1,32 | 0,03948 | NM_001172173           | DCX            |
| 8174543 | -0,85 | -1,81 | 0,01120 | -0,74 | -1,67 | 0,00031 | NM_000555              | TCL1A          |
| 7981183 | -0,85 | -1,81 | 0,00142 | -1,65 | -3,14 | 0,01026 | NM_021966              | ---            |
| 8048978 | -0,85 | -1,81 | 0,00879 | -0,72 | -1,65 | 0,03865 | ---                    | SLC30A3        |
| 8051050 | -0,85 | -1,81 | 0,22622 | -0,45 | -1,37 | 0,45429 | NM_003459              | FLJ37453       |
| 7912672 | -0,85 | -1,81 | 0,15637 | -0,85 | -1,80 | 0,09667 | NR_024279              | FKSG73         |
| 8071058 | -0,85 | -1,81 | 0,04568 | -1,26 | -2,39 | 0,00082 | NR_027714              | B3GNT7         |
| 8049075 | -0,85 | -1,81 | 0,49429 | -0,97 | -1,96 | 0,30067 | NM_145236              | ---            |
| 7964627 | -0,86 | -1,81 | 0,00884 | -0,80 | -1,75 | 0,00041 | ---                    | OIP5           |
| 7987636 | -0,86 | -1,81 | 0,03854 | 2,05  | 4,14  | 0,00134 | NM_007280              | SNORA14B       |
| 7925182 | -0,86 | -1,81 | 0,04565 | -0,32 | -1,25 | 0,05668 | NR_002956              | LOC100130924   |
| 8077877 | -0,86 | -1,81 | 0,01155 | -1,74 | -3,33 | 0,01747 | AK094424               | MIR125B2       |
| 8067946 | -0,86 | -1,81 | 0,09125 | -1,42 | -2,68 | 0,01242 | NR_029694              | ---            |
| 7952781 | -0,86 | -1,81 | 0,06532 | -1,14 | -2,21 | 0,00839 | ---                    | ACAD8          |
| 7945283 | -0,86 | -1,81 | 0,17112 | 1,60  | 3,02  | 0,08263 | NM_014384              | NEBL           |
| 7932453 | -0,86 | -1,81 | 0,02204 | 0,67  | 1,59  | 0,04833 | NM_006393              | KRTAP13-4      |
| 8068136 | -0,86 | -1,81 | 0,15990 | -0,89 | -1,86 | 0,12806 | NM_181600              | OR13C4         |
| 8162929 | -0,86 | -1,81 | 0,19501 | -0,64 | -1,55 | 0,07033 | NM_001001919           | IL17A          |
| 8120210 | -0,86 | -1,81 | 0,05220 | -1,45 | -2,72 | 0,00821 | NM_002190              | RPS6KA5        |
| 7980744 | -0,86 | -1,81 | 0,12118 | 2,62  | 6,16  | 0,00268 | NM_004755              | ---            |
| 8145687 | -0,86 | -1,81 | 0,00180 | -1,42 | -2,68 | 0,00261 | ---                    | C6orf15        |
| 8124859 | -0,86 | -1,81 | 0,17065 | -1,38 | -2,60 | 0,00627 | NM_014070              | GPBAR1         |
| 8048249 | -0,86 | -1,81 | 0,07271 | -0,61 | -1,53 | 0,08914 | NM_001077191           | ZNF598         |
| 7998679 | -0,86 | -1,81 | 0,03143 | -0,61 | -1,52 | 0,28361 | NM_178167              | SPATA12        |
| 8080640 | -0,86 | -1,81 | 0,21749 | -0,07 | -1,05 | 0,82812 | NM_181727              | C1QTNF7        |
| 8094184 | -0,86 | -1,81 | 0,18996 | -1,67 | -3,18 | 0,00701 | NM_001135170           | FAM36A         |
| 7911085 | -0,86 | -1,81 | 0,12944 | -1,28 | -2,43 | 0,08382 | NM_198076              | POM121L2       |
| 8124495 | -0,86 | -1,81 | 0,09676 | -1,04 | -2,05 | 0,03833 | NM_033482              | ING1           |
| 7970096 | -0,86 | -1,81 | 0,05280 | -0,20 | -1,15 | 0,64577 | NM_005537              | CNPY1          |
| 8144072 | -0,86 | -1,81 | 0,11724 | -0,96 | -1,95 | 0,09403 | NM_001103176           | DCDC5          |
| 7947282 | -0,86 | -1,81 | 0,03598 | -0,93 | -1,90 | 0,00867 | AK128035               | RIPK4          |
| 8070489 | -0,86 | -1,81 | 0,10635 | 0,63  | 1,55  | 0,03619 | NM_020639              | CCDC74A        |
| 8055173 | -0,86 | -1,81 | 0,03170 | -0,72 | -1,64 | 0,01689 | NM_138770              | LOC100130507   |
| 7952882 | -0,86 | -1,81 | 0,13312 | -0,90 | -1,86 | 0,01475 | ENST00000442954        | C13orf29       |
| 7972826 | -0,86 | -1,81 | 0,06383 | -0,78 | -1,72 | 0,13867 | NR_027701              | RIC3           |
| 7946340 | -0,86 | -1,81 | 0,02174 | -0,96 | -1,95 | 0,02395 | NM_024557              | ---            |
| 8133872 | -0,86 | -1,81 | 0,16182 | -1,14 | -2,21 | 0,00208 | ---                    | CPNE5          |
| 8126035 | -0,86 | -1,81 | 0,10994 | -0,63 | -1,54 | 0,00908 | NM_020939              | FTHL17         |
| 8171917 | -0,86 | -1,81 | 0,11811 | -2,18 | -4,54 | 0,00103 | NM_031894              | ZNF180         |
| 8037474 | -0,86 | -1,81 | 0,09208 | 1,65  | 3,15  | 0,00082 | NM_013256              | PSMA8          |
| 8020691 | -0,86 | -1,81 | 0,02293 | -0,83 | -1,77 | 0,03528 | NM_144662              | HSPB9          |
| 8007208 | -0,86 | -1,81 | 0,11768 | -1,39 | -2,63 | 0,01360 | NM_033194              | ---            |
| 8085912 | -0,86 | -1,81 | 0,17292 | -1,06 | -2,08 | 0,00757 | ---                    | ---            |
| 7947915 | -0,86 | -1,81 | 0,02073 | -1,32 | -2,50 | 0,04096 | ---                    | ---            |
| 7946561 | -0,86 | -1,81 | 0,25313 | -0,96 | -1,95 | 0,06350 | ---                    | TFDP3          |
| 8175209 | -0,86 | -1,81 | 0,08509 | -0,11 | -1,08 | 0,24806 | NM_016521              | CLDN7          |
| 8012126 | -0,86 | -1,81 | 0,01843 | 4,80  | 27,92 | 0,00016 | NM_001307              | LOC100131541   |
| 7951140 | -0,86 | -1,81 | 0,21283 | -2,32 | -4,98 | 0,00256 | AY358248               | C9orf31        |
| 8163892 | -0,86 | -1,81 | 0,04435 | -1,14 | -2,21 | 0,01714 | AF220263               | OR14A2         |
| 7925730 | -0,86 | -1,81 | 0,07460 | -1,00 | -2,00 | 0,02489 | ENST00000366485        | USP50          |
| 7988705 | -0,86 | -1,81 | 0,01787 | -0,80 | -1,74 | 0,00838 | NM_203494              | ---            |
| 7953977 | -0,86 | -1,81 | 0,22640 | -1,06 | -2,09 | 0,00713 | ---                    | TRIM48         |
| 7939912 | -0,86 | -1,81 | 0,04646 | -1,60 | -3,03 | 0,00050 | NM_024114              | ZNF670         |
| 7925672 | -0,86 | -1,81 | 0,02079 | 0,98  | 1,97  | 0,05039 | NM_033213              | ---            |
| 8129067 | -0,86 | -1,81 | 0,06467 | -0,94 | -1,92 | 0,01037 | ---                    | RNU5D // RNU5D |
| 7915592 | -0,86 | -1,81 | 0,00596 | -0,78 | -1,71 | 0,00764 | NR_002755 // NR_002755 | TAF8           |
| 8119503 | -0,86 | -1,81 | 0,00197 | 0,67  | 1,60  | 0,04336 | NM_138572              | SNORD45A       |
| 7902398 | -0,86 | -1,81 | 0,18882 | 0,19  | 1,14  | 0,57822 | NR_002749              | DLX5           |
| 8141140 | -0,86 | -1,81 | 0,00022 | -1,65 | -3,13 | 0,00104 | NM_005221              | ---            |
| 8108470 | -0,86 | -1,81 | 0,24471 | -1,91 | -3,75 | 0,01592 | ---                    | ---            |
| 8133858 | -0,86 | -1,81 | 0,00106 | -1,39 | -2,62 | 0,00121 | ---                    | OR5AU1         |
| 7977655 | -0,86 | -1,81 | 0,11554 | -1,77 | -3,41 | 0,00018 | NM_001004731           | PLA2G4D        |
| 7987792 | -0,86 | -1,81 | 0,16821 | -1,36 | -2,57 | 0,00145 | NM_178034              | ADAM3A         |
| 8150375 | -0,86 | -1,81 | 0,08366 | -0,86 | -1,81 | 0,00065 | NR_024107              | OR4Q3          |
| 7973004 | -0,86 | -1,81 | 0,34368 | -1,16 | -2,24 | 0,04994 | NM_172194              | AGER           |

|         |       |       |         |       |       |         |                        |                    |
|---------|-------|-------|---------|-------|-------|---------|------------------------|--------------------|
| 8179967 | -0,86 | -1,81 | 0,19676 | -0,22 | -1,16 | 0,44754 | NM_001136              | ZNF668             |
| 8000974 | -0,86 | -1,81 | 0,03917 | -1,32 | -2,50 | 0,03392 | NM_024706              | GPR98              |
| 8106827 | -0,86 | -1,81 | 0,01802 | -0,87 | -1,82 | 0,00005 | NM_032119              | GPR18              |
| 7972548 | -0,86 | -1,81 | 0,02170 | -1,54 | -2,92 | 0,01122 | NM_005292              | ACY3               |
| 7949873 | -0,86 | -1,81 | 0,05524 | -0,95 | -1,93 | 0,01568 | NM_080658              | FAM156A            |
| 8172813 | -0,86 | -1,81 | 0,06290 | 1,40  | 2,65  | 0,00212 | NM_014138              | CNTN5              |
| 7943319 | -0,86 | -1,81 | 0,07556 | -0,97 | -1,95 | 0,00019 | NM_014361              | VCY                |
| 8176650 | -0,86 | -1,81 | 0,19522 | -1,46 | -2,74 | 0,05838 | NM_004679              | VCY                |
| 8177169 | -0,86 | -1,81 | 0,19522 | -1,46 | -2,74 | 0,05838 | NM_004679              | KLHL14             |
| 8022817 | -0,86 | -1,81 | 0,02911 | -1,68 | -3,20 | 0,00807 | NM_020805              | OR11G2             |
| 7973028 | -0,86 | -1,81 | 0,20792 | -1,07 | -2,11 | 0,03385 | NM_001005503           | WDFY4              |
| 7927405 | -0,86 | -1,81 | 0,08513 | -1,19 | -2,28 | 0,00021 | NM_020945              | OR2T1              |
| 7911278 | -0,86 | -1,81 | 0,09902 | -2,01 | -4,04 | 0,00210 | NM_030904              | CDKL2              |
| 8101031 | -0,86 | -1,82 | 0,00484 | 0,08  | 1,05  | 0,77691 | NM_003948              | TGM1               |
| 7978222 | -0,86 | -1,82 | 0,03935 | -0,95 | -1,93 | 0,00282 | NM_000359              | F13B               |
| 7923073 | -0,86 | -1,82 | 0,03039 | -1,21 | -2,31 | 0,00786 | NM_001994              | CPN2               |
| 8092836 | -0,86 | -1,82 | 0,17150 | -2,00 | -4,01 | 0,00023 | NM_001080513           | MNDA               |
| 7906377 | -0,86 | -1,82 | 0,04897 | -0,98 | -1,97 | 0,05836 | NM_002432              | LOC120824          |
| 7948048 | -0,86 | -1,82 | 0,08295 | -1,31 | -2,48 | 0,00080 | ENST00000437540        | FANCE              |
| 8118963 | -0,86 | -1,82 | 0,26136 | 1,83  | 3,56  | 0,00422 | NM_021922              | OR5L1              |
| 7939944 | -0,86 | -1,82 | 0,06224 | -0,66 | -1,58 | 0,01320 | NM_001004738           | VSIG4              |
| 8173287 | -0,86 | -1,82 | 0,00280 | -0,33 | -1,26 | 0,07859 | NM_007268              | RNASE9             |
| 7977596 | -0,86 | -1,82 | 0,01232 | -1,61 | -3,04 | 0,00637 | NM_001110359           | LYNX1              |
| 8153346 | -0,86 | -1,82 | 0,00812 | -1,37 | -2,58 | 0,00033 | NM_023946              | ---                |
| 8022277 | -0,86 | -1,82 | 0,01414 | -2,41 | -5,31 | 0,00180 | ---                    | ATAD5              |
| 8006187 | -0,86 | -1,82 | 0,01236 | 0,19  | 1,14  | 0,17358 | NM_024857              | DGKK               |
| 8172670 | -0,86 | -1,82 | 0,03599 | -0,74 | -1,68 | 0,00547 | NM_001013742           | SNORD45B           |
| 7902400 | -0,86 | -1,82 | 0,01084 | -0,87 | -1,83 | 0,00393 | NR_002748              | SNORD31            |
| 7948898 | -0,86 | -1,82 | 0,11916 | -0,32 | -1,25 | 0,14882 | NR_002560              | ---                |
| 7905742 | -0,86 | -1,82 | 0,13995 | -0,65 | -1,57 | 0,00122 | ---                    | ARGFX              |
| 8081989 | -0,86 | -1,82 | 0,04518 | -0,83 | -1,78 | 0,01543 | NM_001012659           | PRY                |
| 8176806 | -0,86 | -1,82 | 0,09886 | -1,43 | -2,69 | 0,00569 | NM_004676              | CA5BP              |
| 8166179 | -0,86 | -1,82 | 0,22042 | -0,59 | -1,51 | 0,37581 | NR_026551              | ---                |
| 7909780 | -0,86 | -1,82 | 0,00198 | -1,02 | -2,03 | 0,01976 | ---                    | EPHX3              |
| 8034974 | -0,86 | -1,82 | 0,08939 | 0,91  | 1,87  | 0,12512 | NM_024794              | ---                |
| 8146896 | -0,86 | -1,82 | 0,52679 | -3,00 | -8,02 | 0,00403 | ---                    | LOC390282          |
| 7960434 | -0,86 | -1,82 | 0,01425 | -0,50 | -1,41 | 0,02182 | ENST00000439470        | LRG1               |
| 8032834 | -0,86 | -1,82 | 0,03275 | -0,90 | -1,86 | 0,07016 | NM_052972              | PCDH12             |
| 8114780 | -0,86 | -1,82 | 0,11061 | -1,29 | -2,44 | 0,00015 | NM_016580              | C13orf26           |
| 7968361 | -0,86 | -1,82 | 0,03374 | -0,76 | -1,70 | 0,01005 | BC030277               | POM121L8P          |
| 8071170 | -0,86 | -1,82 | 0,30642 | -1,36 | -2,57 | 0,00170 | NR_024583              | ---                |
| 8022994 | -0,86 | -1,82 | 0,19660 | -0,42 | -1,34 | 0,09573 | ---                    | KEL                |
| 8143534 | -0,86 | -1,82 | 0,04861 | -1,10 | -2,15 | 0,00733 | NM_000420              | PURG               |
| 8150143 | -0,86 | -1,82 | 0,05584 | -0,67 | -1,59 | 0,03730 | NM_001015508           | HEATR7A            |
| 8148783 | -0,86 | -1,82 | 0,00668 | 1,55  | 2,92  | 0,10145 | NM_032450              | BMP10              |
| 8052747 | -0,86 | -1,82 | 0,24879 | -1,12 | -2,18 | 0,00533 | NM_014482              | OR4F21             |
| 8148962 | -0,86 | -1,82 | 0,64955 | -2,39 | -5,23 | 0,00999 | NM_001005504           | C8G                |
| 8159491 | -0,86 | -1,82 | 0,09079 | -1,41 | -2,66 | 0,06479 | NM_000606              | OR3A2              |
| 8011331 | -0,86 | -1,82 | 0,19036 | -1,57 | -2,97 | 0,06633 | NM_002551              | ORC6L              |
| 7995354 | -0,86 | -1,82 | 0,02368 | -0,30 | -1,23 | 0,44262 | NM_014321              | MIR135A1           |
| 8087883 | -0,86 | -1,82 | 0,00717 | -0,77 | -1,70 | 0,00111 | NR_029677              | ---                |
| 8119799 | -0,86 | -1,82 | 0,13808 | -0,86 | -1,82 | 0,00436 | ---                    | USP17L2 // USP17L2 |
| 8144395 | -0,86 | -1,82 | 0,53494 | -2,46 | -5,51 | 0,00115 | NM_201402 // NM_201402 | OR4N4              |
| 7981783 | -0,86 | -1,82 | 0,04358 | -1,14 | -2,21 | 0,36423 | NM_001005241           | LOC100287948       |
| 7907907 | -0,86 | -1,82 | 0,01653 | -1,15 | -2,22 | 0,00216 | AF387616               | LOC440896          |
| 8161526 | -0,86 | -1,82 | 0,06702 | -1,78 | -3,44 | 0,00301 | AK127288               | GPR174             |
| 8168531 | -0,86 | -1,82 | 0,15113 | -0,99 | -1,98 | 0,01048 | NM_032553              | SNORD116-28        |
| 7982004 | -0,86 | -1,82 | 0,07138 | -0,67 | -1,59 | 0,09998 | NR_003361              | SLC25A41           |
| 8033179 | -0,86 | -1,82 | 0,17015 | -0,93 | -1,90 | 0,09722 | NM_173637              | ---                |
| 7985553 | -0,86 | -1,82 | 0,00748 | -0,93 | -1,90 | 0,06805 | ---                    | ABCG1              |
| 8068761 | -0,86 | -1,82 | 0,11417 | -0,04 | -1,02 | 0,82460 | NM_207627              | SNORD115-38        |
| 7982082 | -0,86 | -1,82 | 0,00660 | -0,91 | -1,88 | 0,00039 | NR_003353              | SI                 |
| 8091811 | -0,86 | -1,82 | 0,10483 | -1,07 | -2,10 | 0,00135 | NM_001041              | USP51              |
| 8173174 | -0,86 | -1,82 | 0,00103 | -1,35 | -2,55 | 0,01921 | NM_201286              | NSUN7              |
| 8094759 | -0,86 | -1,82 | 0,05888 | 1,43  | 2,70  | 0,00092 | NM_024677              | LOC100131726       |
| 8152642 | -0,86 | -1,82 | 0,20466 | -0,36 | -1,28 | 0,32154 | NR_024479              | MEPE               |
| 8096290 | -0,86 | -1,82 | 0,05753 | -0,92 | -1,89 | 0,00105 | NM_020203              | MC2R               |
| 8022412 | -0,86 | -1,82 | 0,08530 | -1,22 | -2,34 | 0,03745 | NM_000529              | PTPRN              |
| 8059186 | -0,86 | -1,82 | 0,18176 | -1,37 | -2,58 | 0,00276 | NM_002846              | ---                |
| 7922821 | -0,86 | -1,82 | 0,02730 | -1,81 | -3,50 | 0,00168 | ---                    | ABLIM2             |
| 8099279 | -0,86 | -1,82 | 0,25531 | -0,58 | -1,50 | 0,00139 | NM_001130083           | KRTAP15-1          |
| 8068139 | -0,86 | -1,82 | 0,00679 | -0,98 | -1,97 | 0,02020 | NM_181623              | ZBTB22             |
| 8178988 | -0,86 | -1,82 | 0,04578 | -0,05 | -1,03 | 0,79047 | NM_005453              | GAGE12J            |

|         |       |       |         |       |        |         |                 |           |
|---------|-------|-------|---------|-------|--------|---------|-----------------|-----------|
| 8167526 | -0,86 | -1,82 | 0,40438 | -1,92 | -3,78  | 0,00884 | NM_001098406    | FAM75A7   |
| 8155349 | -0,86 | -1,82 | 0,11961 | -1,53 | -2,90  | 0,00346 | NM_015667       | PDIA2     |
| 7991815 | -0,86 | -1,82 | 0,01309 | -0,55 | -1,46  | 0,38180 | NM_006849       | RORC      |
| 7920082 | -0,86 | -1,82 | 0,03212 | -1,06 | -2,09  | 0,01953 | NM_005060       | MDS2      |
| 7898869 | -0,86 | -1,82 | 0,29168 | -1,92 | -3,78  | 0,01392 | ENST00000374555 | ---       |
| 8047036 | -0,86 | -1,82 | 0,00818 | -1,45 | -2,73  | 0,00020 | ---             | ---       |
| 8083745 | -0,87 | -1,82 | 0,00537 | -0,86 | -1,82  | 0,04144 | ---             | ---       |
| 8045334 | -0,87 | -1,82 | 0,17444 | -0,83 | -1,78  | 0,17652 | ---             | ---       |
| 7961418 | -0,87 | -1,82 | 0,20445 | -3,41 | -10,64 | 0,00002 | ---             | KCNG1     |
| 8067033 | -0,87 | -1,82 | 0,01211 | -0,68 | -1,60  | 0,12829 | NM_002237       | C14orf148 |
| 7980390 | -0,87 | -1,82 | 0,04214 | 0,08  | 1,06   | 0,55022 | NM_001113475    | ZBTB25    |
| 7979611 | -0,87 | -1,82 | 0,08827 | 0,68  | 1,60   | 0,21568 | NM_006977       | AMPD1     |
| 7918794 | -0,87 | -1,82 | 0,00015 | -0,70 | -1,63  | 0,03683 | NM_000036       | RSPO2     |
| 8152314 | -0,87 | -1,82 | 0,02452 | -1,32 | -2,49  | 0,00669 | NM_178565       | UPK1A     |
| 8027938 | -0,87 | -1,82 | 0,00232 | 1,04  | 2,06   | 0,06593 | NM_007000       | ---       |
| 8134077 | -0,87 | -1,82 | 0,02328 | -1,14 | -2,21  | 0,00000 | ---             | ---       |
| 8173308 | -0,87 | -1,82 | 0,02177 | -1,35 | -2,55  | 0,01045 | ---             | ---       |
| 7934977 | -0,87 | -1,82 | 0,06741 | -1,42 | -2,67  | 0,00816 | ---             | CCDC107   |
| 8155073 | -0,87 | -1,82 | 0,00605 | -1,19 | -2,28  | 0,00094 | NM_174923       | ---       |
| 7908157 | -0,87 | -1,82 | 0,15318 | -0,90 | -1,86  | 0,07635 | ---             | ---       |
| 7933840 | -0,87 | -1,82 | 0,03283 | -1,07 | -2,10  | 0,00002 | ---             | ---       |
| 8110216 | -0,87 | -1,82 | 0,20482 | -1,80 | -3,48  | 0,00054 | ---             | VPS37C    |
| 7948504 | -0,87 | -1,82 | 0,01180 | 0,76  | 1,69   | 0,02467 | NM_017966       | ---       |
| 7979982 | -0,87 | -1,82 | 0,07693 | -0,06 | -1,04  | 0,83362 | ---             | ---       |
| 8106960 | -0,87 | -1,82 | 0,09017 | -1,13 | -2,19  | 0,01899 | ---             | EEF1A2    |
| 8067652 | -0,87 | -1,82 | 0,02635 | 1,03  | 2,05   | 0,02579 | NM_001958       | CT45A6    |
| 8175353 | -0,87 | -1,82 | 0,15983 | -1,60 | -3,04  | 0,00005 | NM_001017438    | OSTBETA   |
| 7984245 | -0,87 | -1,82 | 0,02014 | -1,17 | -2,25  | 0,01242 | NM_178859       | MAP4K2    |
| 7949172 | -0,87 | -1,82 | 0,04525 | 1,15  | 2,22   | 0,11598 | NM_004579       | ---       |
| 8041223 | -0,87 | -1,82 | 0,01664 | -0,77 | -1,70  | 0,00168 | ---             | ZBTB12    |
| 8125201 | -0,87 | -1,82 | 0,06523 | -1,27 | -2,41  | 0,02247 | NM_181842       | ZBTB12    |
| 8178683 | -0,87 | -1,82 | 0,06523 | -1,27 | -2,41  | 0,02247 | NM_181842       | IL22      |
| 7964803 | -0,87 | -1,82 | 0,02669 | -1,32 | -2,50  | 0,01003 | NM_020525       | ---       |
| 8088546 | -0,87 | -1,82 | 0,01089 | -0,90 | -1,86  | 0,01645 | ---             | ---       |
| 8145887 | -0,87 | -1,82 | 0,14300 | -0,94 | -1,92  | 0,00695 | ---             | ADAM2     |
| 8150395 | -0,87 | -1,82 | 0,00780 | -0,60 | -1,51  | 0,00082 | NM_001464       | TRIM11    |
| 7924868 | -0,87 | -1,82 | 0,04036 | 0,06  | 1,05   | 0,87475 | NM_145214       | MIR194-1  |
| 7924403 | -0,87 | -1,82 | 0,03702 | -0,88 | -1,84  | 0,07930 | NR_029711       | PLAC2     |
| 8032965 | -0,87 | -1,82 | 0,24510 | -1,34 | -2,52  | 0,06276 | BC036545        | FAM75A7   |
| 8161341 | -0,87 | -1,82 | 0,09507 | -1,57 | -2,97  | 0,00864 | NM_015667       | ---       |
| 8120466 | -0,87 | -1,82 | 0,01519 | -1,16 | -2,23  | 0,00014 | ---             | SARS2     |
| 8036656 | -0,87 | -1,82 | 0,12009 | 0,83  | 1,78   | 0,12498 | NM_017827       | DLEC1     |
| 8078690 | -0,87 | -1,82 | 0,01345 | -0,77 | -1,71  | 0,00331 | NM_007335       | ---       |
| 8077511 | -0,87 | -1,82 | 0,01511 | -0,74 | -1,67  | 0,14311 | ---             | ---       |
| 8014197 | -0,87 | -1,82 | 0,05428 | -1,18 | -2,27  | 0,01279 | ---             | ---       |
| 8136469 | -0,87 | -1,82 | 0,02321 | -1,40 | -2,63  | 0,00001 | ---             | ---       |
| 8042976 | -0,87 | -1,82 | 0,00292 | -0,71 | -1,63  | 0,00025 | ---             | PRTG      |
| 7989073 | -0,87 | -1,83 | 0,00728 | 3,40  | 10,56  | 0,00084 | NM_173814       | ---       |
| 8017102 | -0,87 | -1,83 | 0,03121 | -1,33 | -2,52  | 0,00038 | ---             | UNC45B    |
| 8006509 | -0,87 | -1,83 | 0,00149 | -0,56 | -1,47  | 0,05779 | NM_173167       | ---       |
| 8083996 | -0,87 | -1,83 | 0,01289 | -1,06 | -2,08  | 0,00034 | ---             | MBD3L5    |
| 8025126 | -0,87 | -1,83 | 0,22632 | -1,84 | -3,59  | 0,01328 | NM_001136507    | ---       |
| 7978690 | -0,87 | -1,83 | 0,00681 | -1,08 | -2,12  | 0,03853 | ---             | ---       |
| 8166182 | -0,87 | -1,83 | 0,05735 | -0,91 | -1,88  | 0,01957 | ---             | ---       |
| 7955417 | -0,87 | -1,83 | 0,06093 | -0,57 | -1,48  | 0,00138 | ---             | GP1BB     |
| 8071272 | -0,87 | -1,83 | 0,49518 | -0,75 | -1,68  | 0,00653 | L20860          | ---       |
| 8158993 | -0,87 | -1,83 | 0,06676 | -1,52 | -2,87  | 0,00425 | ---             | NMRAL1    |
| 7999149 | -0,87 | -1,83 | 0,03796 | 0,11  | 1,08   | 0,84842 | NM_020677       | HEPH      |
| 8167973 | -0,87 | -1,83 | 0,04957 | -0,76 | -1,69  | 0,03051 | NM_138737       | POU3F1    |
| 7915156 | -0,87 | -1,83 | 0,22908 | -1,93 | -3,80  | 0,01462 | NM_002699       | SNORD28   |
| 7948904 | -0,87 | -1,83 | 0,01361 | 1,54  | 2,92   | 0,13373 | NR_002562       | LRRIQ4    |
| 8083808 | -0,87 | -1,83 | 0,01102 | -0,73 | -1,65  | 0,00059 | NM_001080460    | NAG18     |
| 8031840 | -0,87 | -1,83 | 0,12955 | -1,22 | -2,33  | 0,01466 | AF210651        | ---       |
| 8146401 | -0,87 | -1,83 | 0,07481 | -0,97 | -1,96  | 0,00062 | ---             | OLIG3     |
| 8129872 | -0,87 | -1,83 | 0,13459 | -1,70 | -3,24  | 0,00525 | NM_175747       | NKAPL     |
| 8117663 | -0,87 | -1,83 | 0,11841 | -1,15 | -2,22  | 0,01645 | NM_001007531    | ---       |
| 8052945 | -0,87 | -1,83 | 0,03227 | -1,98 | -3,94  | 0,00000 | ---             | DSC2      |
| 8022711 | -0,87 | -1,83 | 0,06422 | 3,24  | 9,42   | 0,00045 | NM_024422       | SLC12A5   |
| 8063129 | -0,87 | -1,83 | 0,14884 | -0,73 | -1,66  | 0,00671 | NM_020708       | COL29A1   |
| 8082585 | -0,87 | -1,83 | 0,00234 | -1,26 | -2,40  | 0,00111 | NR_022012       | ---       |
| 7939922 | -0,87 | -1,83 | 0,17005 | -2,39 | -5,24  | 0,00049 | ---             | PPP1R2P9  |
| 8172197 | -0,87 | -1,83 | 0,16254 | -1,90 | -3,74  | 0,04255 | NR_002191       | C9orf144  |
| 8160900 | -0,87 | -1,83 | 0,10043 | -0,67 | -1,59  | 0,16400 | NR_024481       | EVX1      |

|         |       |       |         |       |       |         |                 |              |
|---------|-------|-------|---------|-------|-------|---------|-----------------|--------------|
| 8131970 | -0,87 | -1,83 | 0,00614 | -1,12 | -2,17 | 0,00146 | NM_001989       | ---          |
| 8094355 | -0,87 | -1,83 | 0,00582 | -0,80 | -1,74 | 0,08960 | ---             | TACR3        |
| 8102127 | -0,87 | -1,83 | 0,07826 | -0,80 | -1,74 | 0,05044 | NM_001059       | AGXT2L1      |
| 8102249 | -0,87 | -1,83 | 0,03235 | -0,63 | -1,55 | 0,02696 | NM_031279       | RASEF        |
| 8161945 | -0,87 | -1,83 | 0,12162 | 1,21  | 2,31  | 0,00956 | NM_152573       | CPLX3        |
| 7984908 | -0,87 | -1,83 | 0,05567 | -1,73 | -3,32 | 0,08925 | NM_001030005    | KCNT1        |
| 8159283 | -0,87 | -1,83 | 0,05089 | -0,86 | -1,81 | 0,02645 | NM_020822       | ---          |
| 7944033 | -0,87 | -1,83 | 0,00133 | -1,28 | -2,42 | 0,00570 | ---             | C14orf38     |
| 7979444 | -0,87 | -1,83 | 0,00232 | -1,01 | -2,01 | 0,02422 | NM_001164399    | HLA-DRB3     |
| 8180003 | -0,87 | -1,83 | 0,10254 | 0,66  | 1,58  | 0,03977 | NM_022555       | RAPGEF5      |
| 8138504 | -0,87 | -1,83 | 0,07096 | 0,85  | 1,81  | 0,14027 | NM_012294       | SIRT2        |
| 8036636 | -0,87 | -1,83 | 0,09409 | 0,24  | 1,18  | 0,60514 | NM_012237       | ---          |
| 8060609 | -0,87 | -1,83 | 0,28250 | -1,12 | -2,17 | 0,10847 | ---             | CBLN2        |
| 8023822 | -0,87 | -1,83 | 0,03503 | -1,08 | -2,11 | 0,00479 | NM_182511       | ---          |
| 8007902 | -0,87 | -1,83 | 0,03852 | -0,95 | -1,94 | 0,05092 | ---             | C4orf35      |
| 8095484 | -0,87 | -1,83 | 0,02421 | -1,04 | -2,06 | 0,03069 | NM_033122       | ---          |
| 8088636 | -0,87 | -1,83 | 0,07893 | -0,73 | -1,66 | 0,07829 | ---             | SEZ6L        |
| 8072088 | -0,87 | -1,83 | 0,09385 | -1,22 | -2,32 | 0,05858 | NM_021115       | OPRM1        |
| 8122887 | -0,87 | -1,83 | 0,01788 | -0,82 | -1,77 | 0,00002 | NM_000914       | A2BP1        |
| 7993083 | -0,87 | -1,83 | 0,05008 | -1,24 | -2,36 | 0,00018 | NM_018723       | C1orf194     |
| 7918294 | -0,87 | -1,83 | 0,13716 | -0,98 | -1,98 | 0,02854 | NM_001122961    | C12orf68     |
| 7955107 | -0,87 | -1,83 | 0,00804 | -0,18 | -1,14 | 0,11088 | NM_001013635    | HMGB4        |
| 7899905 | -0,87 | -1,83 | 0,14778 | -0,90 | -1,86 | 0,02328 | NM_145205       | C15orf34     |
| 7984631 | -0,87 | -1,83 | 0,05849 | -1,48 | -2,80 | 0,00042 | NR_027262       | SLC24A4      |
| 7976263 | -0,87 | -1,83 | 0,00352 | -0,60 | -1,52 | 0,05703 | NM_153646       | ADRA2A       |
| 7930482 | -0,87 | -1,83 | 0,06849 | -2,54 | -5,81 | 0,00026 | NM_000681       | TFAP2B       |
| 8120194 | -0,87 | -1,83 | 0,03562 | -2,02 | -4,05 | 0,00109 | NM_003221       | OR52E5       |
| 7938063 | -0,87 | -1,83 | 0,16672 | -1,27 | -2,42 | 0,05169 | ENST00000316698 | FLJ44674     |
| 7995440 | -0,87 | -1,83 | 0,03925 | -1,60 | -3,03 | 0,00286 | AK128747        | ---          |
| 7899073 | -0,87 | -1,83 | 0,08756 | -0,89 | -1,85 | 0,09003 | ---             | ---          |
| 8082118 | -0,87 | -1,83 | 0,05993 | -1,75 | -3,35 | 0,03814 | ---             | CACNA1A      |
| 8034643 | -0,87 | -1,83 | 0,04727 | -1,03 | -2,04 | 0,00667 | NM_000068       | ---          |
| 8161904 | -0,87 | -1,83 | 0,04536 | -1,06 | -2,08 | 0,05255 | ---             | VSIG7        |
| 7986561 | -0,87 | -1,83 | 0,06070 | -2,01 | -4,02 | 0,00639 | ENST00000338912 | HLA-DRA      |
| 8118548 | -0,87 | -1,83 | 0,04886 | 0,96  | 1,94  | 0,09159 | NM_019111       | AKAP4        |
| 8172660 | -0,87 | -1,83 | 0,02988 | -1,01 | -2,01 | 0,01784 | NM_003886       | IFNA1        |
| 8154627 | -0,87 | -1,83 | 0,05818 | -1,47 | -2,77 | 0,03807 | NM_024013       | STAB1        |
| 8080344 | -0,87 | -1,83 | 0,05568 | -1,24 | -2,36 | 0,00049 | NM_015136       | AGER         |
| 8178771 | -0,87 | -1,83 | 0,20631 | -0,22 | -1,17 | 0,49746 | NM_001136       | OR6C74       |
| 7955985 | -0,87 | -1,83 | 0,02044 | -1,21 | -2,31 | 0,04539 | NM_001005490    | KIF5A        |
| 7956488 | -0,87 | -1,83 | 0,02750 | -0,41 | -1,33 | 0,06825 | NM_004984       | ---          |
| 8114285 | -0,87 | -1,83 | 0,08977 | -1,10 | -2,14 | 0,02163 | ---             | GKN1         |
| 8042431 | -0,87 | -1,83 | 0,00518 | -0,50 | -1,41 | 0,11373 | NM_019617       | C15orf43     |
| 7983381 | -0,87 | -1,83 | 0,05153 | -0,42 | -1,34 | 0,06510 | BC029537        | ---          |
| 7902365 | -0,87 | -1,83 | 0,03993 | -1,04 | -2,05 | 0,17116 | ---             | ---          |
| 8046012 | -0,87 | -1,83 | 0,03350 | -1,09 | -2,14 | 0,01581 | ---             | KLF15        |
| 8090343 | -0,87 | -1,83 | 0,07201 | -0,68 | -1,60 | 0,26266 | NM_014079       | FNDC8        |
| 8006504 | -0,87 | -1,83 | 0,16911 | -1,85 | -3,60 | 0,00044 | NM_017559       | ---          |
| 8035682 | -0,87 | -1,83 | 0,04998 | -1,00 | -1,99 | 0,03124 | ---             | NYX          |
| 8166899 | -0,87 | -1,83 | 0,16577 | -1,15 | -2,23 | 0,01884 | NM_022567       | ---          |
| 7975630 | -0,87 | -1,83 | 0,02806 | -0,82 | -1,77 | 0,00037 | ---             | MOBP         |
| 8078920 | -0,87 | -1,83 | 0,13503 | -1,52 | -2,87 | 0,00031 | NR_003090       | GLI1         |
| 7956430 | -0,87 | -1,83 | 0,02401 | -1,31 | -2,47 | 0,06261 | NM_005269       | SEC14L5      |
| 7993054 | -0,87 | -1,83 | 0,07991 | -1,31 | -2,47 | 0,02289 | NM_014692       | PLXNB3       |
| 8170716 | -0,87 | -1,83 | 0,01015 | -0,86 | -1,81 | 0,02523 | NM_005393       | C8orf17      |
| 8148463 | -0,87 | -1,83 | 0,01800 | -1,60 | -3,03 | 0,01354 | AF220264        | LOC100287671 |
| 8105189 | -0,87 | -1,83 | 0,01452 | -1,96 | -3,89 | 0,00799 | BC137195        | KAAG1        |
| 8117189 | -0,87 | -1,83 | 0,01078 | -1,25 | -2,38 | 0,11357 | NM_181337       | ZDHHC23      |
| 8081779 | -0,87 | -1,83 | 0,11344 | 1,44  | 2,72  | 0,08874 | NM_173570       | ANKRD30B     |
| 8069499 | -0,87 | -1,83 | 0,00687 | -0,96 | -1,94 | 0,00425 | NM_001145029    | LRFN1        |
| 8036707 | -0,87 | -1,83 | 0,21400 | -1,18 | -2,27 | 0,02969 | NM_020862       | ---          |
| 8157103 | -0,87 | -1,83 | 0,02247 | -1,13 | -2,18 | 0,01915 | ---             | ---          |
| 8134316 | -0,87 | -1,83 | 0,01687 | -0,52 | -1,43 | 0,01810 | ---             | ---          |
| 8018906 | -0,87 | -1,83 | 0,22238 | -0,10 | -1,07 | 0,68114 | ---             | TEDDM1       |
| 7922703 | -0,87 | -1,83 | 0,15326 | -0,73 | -1,66 | 0,04823 | NM_172000       | TTY2         |
| 8176558 | -0,87 | -1,83 | 0,12886 | -0,60 | -1,51 | 0,04810 | NR_001536       | TTY2         |
| 8177053 | -0,87 | -1,83 | 0,12886 | -0,60 | -1,51 | 0,04810 | NR_001536       | ---          |
| 8078382 | -0,87 | -1,83 | 0,00959 | -0,87 | -1,83 | 0,06166 | ---             | GCET2        |
| 8089478 | -0,87 | -1,83 | 0,10722 | -1,38 | -2,60 | 0,02697 | NM_001008756    | ACTA1        |
| 7924910 | -0,87 | -1,83 | 0,05918 | -1,24 | -2,36 | 0,00244 | NM_001100       | ---          |
| 8142897 | -0,87 | -1,83 | 0,02134 | -0,75 | -1,68 | 0,00173 | ---             | ---          |
| 7919131 | -0,87 | -1,83 | 0,19275 | -2,51 | -5,69 | 0,00721 | ---             | ---          |
| 7974912 | -0,87 | -1,83 | 0,03133 | -1,26 | -2,40 | 0,04187 | ---             | BEND3        |

|         |       |       |         |       |       |         |                 |            |
|---------|-------|-------|---------|-------|-------|---------|-----------------|------------|
| 8128620 | -0,87 | -1,83 | 0,00339 | 0,99  | 1,98  | 0,09296 | NM_001080450    | FAM180B    |
| 7939835 | -0,87 | -1,83 | 0,13284 | -1,02 | -2,03 | 0,06889 | NM_001164379    | PROZ       |
| 7970251 | -0,88 | -1,83 | 0,10776 | -1,22 | -2,33 | 0,02264 | NM_003891       | CCR6       |
| 8123362 | -0,88 | -1,83 | 0,00787 | -0,78 | -1,72 | 0,13428 | BX647686 MRPL38 |            |
| 8018511 | -0,88 | -1,83 | 0,07808 | -0,16 | -1,12 | 0,66697 | NM_032478       | SH3D20     |
| 8016232 | -0,88 | -1,83 | 0,29068 | -1,82 | -3,53 | 0,00030 | NM_174919       | IGSF5      |
| 8068644 | -0,88 | -1,83 | 0,00336 | -0,72 | -1,64 | 0,14942 | NM_001080444    | C2orf52    |
| 8059716 | -0,88 | -1,84 | 0,03803 | -0,26 | -1,20 | 0,55026 | BC033054 ---    |            |
| 7900214 | -0,88 | -1,84 | 0,05840 | -0,74 | -1,67 | 0,00003 | --- USP29       |            |
| 8031686 | -0,88 | -1,84 | 0,04811 | -0,98 | -1,98 | 0,07206 | NM_020903       | ---        |
| 7904048 | -0,88 | -1,84 | 0,19191 | -0,95 | -1,94 | 0,00172 | --- FKSG73      |            |
| 7927097 | -0,88 | -1,84 | 0,01081 | -1,14 | -2,21 | 0,00022 | NR_027714       | PIPOX      |
| 8006005 | -0,88 | -1,84 | 0,02095 | -0,25 | -1,19 | 0,10800 | NM_016518       | WBSCR16    |
| 8140220 | -0,88 | -1,84 | 0,02274 | 0,00  | 1,00  | 0,99718 | NM_030798       | STYK1      |
| 7961215 | -0,88 | -1,84 | 0,00377 | 0,63  | 1,55  | 0,00251 | NM_018423       | ---        |
| 7960259 | -0,88 | -1,84 | 0,11741 | -1,21 | -2,32 | 0,03484 | ---             |            |
| 7930450 | -0,88 | -1,84 | 0,20638 | -2,60 | -6,07 | 0,00089 | --- OR2A25      |            |
| 8136969 | -0,88 | -1,84 | 0,00285 | -1,40 | -2,63 | 0,00332 | NM_001004488    | LAMA5      |
| 8067409 | -0,88 | -1,84 | 0,01815 | 1,65  | 3,15  | 0,03561 | NM_005560       | APOBEC2    |
| 8119403 | -0,88 | -1,84 | 0,15265 | -0,79 | -1,73 | 0,00186 | NM_006789       | ---        |
| 8029937 | -0,88 | -1,84 | 0,10678 | -0,97 | -1,96 | 0,00088 | ---             |            |
| 8086139 | -0,88 | -1,84 | 0,03306 | -1,06 | -2,09 | 0,00661 | ---             |            |
| 8042970 | -0,88 | -1,84 | 0,06437 | -1,61 | -3,06 | 0,01485 | --- NPHS2       |            |
| 7922627 | -0,88 | -1,84 | 0,02898 | -0,89 | -1,86 | 0,01055 | NM_014625       | CDH7       |
| 8021668 | -0,88 | -1,84 | 0,00115 | -0,89 | -1,85 | 0,00780 | NM_033646       | NCRNA00189 |
| 8068100 | -0,88 | -1,84 | 0,06662 | -1,06 | -2,08 | 0,20722 | AF490769 NRK    |            |
| 8169115 | -0,88 | -1,84 | 0,02338 | -1,03 | -2,05 | 0,03796 | NM_198465       | ---        |
| 7941608 | -0,88 | -1,84 | 0,21260 | -0,97 | -1,96 | 0,00020 | --- ARL11       |            |
| 7969145 | -0,88 | -1,84 | 0,09196 | -1,19 | -2,28 | 0,05107 | NM_138450       | CYP7A1     |
| 8150920 | -0,88 | -1,84 | 0,08742 | -0,74 | -1,67 | 0,00278 | NM_000780       | C8orf55    |
| 8148559 | -0,88 | -1,84 | 0,00716 | 0,54  | 1,46  | 0,33803 | NM_016647       | CCRL2      |
| 8093304 | -0,88 | -1,84 | 0,09555 | -1,09 | -2,12 | 0,11116 | NM_003965       | MIR10A     |
| 8016455 | -0,88 | -1,84 | 0,00827 | -1,14 | -2,21 | 0,01390 | NR_029608       | ---        |
| 7972735 | -0,88 | -1,84 | 0,03755 | -1,24 | -2,36 | 0,00497 | --- SSX3        |            |
| 8172406 | -0,88 | -1,84 | 0,24537 | -1,15 | -2,21 | 0,01873 | NM_021014       | HSN2       |
| 7952986 | -0,88 | -1,84 | 0,03856 | 1,16  | 2,24  | 0,00438 | NM_213655       | ---        |
| 8019962 | -0,88 | -1,84 | 0,01195 | -1,53 | -2,88 | 0,00932 | --- NAPSA       |            |
| 8038556 | -0,88 | -1,84 | 0,00505 | 1,45  | 2,74  | 0,02618 | NM_004851       | ---        |
| 8144724 | -0,88 | -1,84 | 0,09091 | -1,79 | -3,46 | 0,01754 | --- PRO2964     |            |
| 8057559 | -0,88 | -1,84 | 0,05008 | -0,59 | -1,51 | 0,05163 | ENST00000424540 | ---        |
| 7948502 | -0,88 | -1,84 | 0,29104 | -1,31 | -2,49 | 0,00161 | --- TAS1R3      |            |
| 7896921 | -0,88 | -1,84 | 0,17554 | -1,42 | -2,68 | 0,01487 | NM_152228       | PEX14      |
| 7897648 | -0,88 | -1,84 | 0,01790 | -0,96 | -1,94 | 0,14813 | NM_004565       | ---        |
| 8160767 | -0,88 | -1,84 | 0,02702 | -0,94 | -1,92 | 0,00271 | --- RIMS2       |            |
| 8147796 | -0,88 | -1,84 | 0,01718 | 1,04  | 2,05  | 0,03762 | NM_001100117    | FAM58B     |
| 7908612 | -0,88 | -1,84 | 0,14142 | -0,03 | -1,02 | 0,95609 | NM_001105517    | PROX2      |
| 7980213 | -0,88 | -1,84 | 0,12562 | -1,27 | -2,41 | 0,01360 | NM_001080408    | RNF182     |
| 8116980 | -0,88 | -1,84 | 0,01494 | -0,11 | -1,08 | 0,56210 | NM_001165032    | ---        |
| 8161433 | -0,88 | -1,84 | 0,34490 | -2,38 | -5,21 | 0,00031 | ---             |            |
| 8131925 | -0,88 | -1,84 | 0,00379 | -0,71 | -1,63 | 0,00105 | --- RPS6KA1     |            |
| 7899192 | -0,88 | -1,84 | 0,02083 | 2,26  | 4,78  | 0,00051 | NM_002953       | OR4A47     |
| 7939877 | -0,88 | -1,84 | 0,21300 | -0,85 | -1,80 | 0,04428 | NM_001005512    | DLGAP2     |
| 8144253 | -0,88 | -1,84 | 0,14864 | -1,18 | -2,26 | 0,00028 | NM_004745       | FAM9B      |
| 8171271 | -0,88 | -1,84 | 0,22902 | -0,63 | -1,55 | 0,01920 | NM_205849       | MAGEB2     |
| 8166611 | -0,88 | -1,84 | 0,00884 | -0,94 | -1,92 | 0,01670 | NM_002364       | CAGE1      |
| 8123780 | -0,88 | -1,84 | 0,00364 | -1,05 | -2,07 | 0,00551 | NM_001170692    | CYP4B1     |
| 7901256 | -0,88 | -1,84 | 0,03146 | -1,40 | -2,63 | 0,00277 | NM_001099772    | HEPHL1     |
| 7943197 | -0,88 | -1,84 | 0,07128 | -1,32 | -2,50 | 0,01234 | NM_001098672    | SNORD1B    |
| 8010080 | -0,88 | -1,84 | 0,01039 | -0,91 | -1,88 | 0,00021 | NR_004396       | MIR101-1   |
| 7916777 | -0,88 | -1,84 | 0,05727 | -0,91 | -1,88 | 0,01652 | NR_029516       | ---        |
| 8097062 | -0,88 | -1,84 | 0,07177 | -1,67 | -3,19 | 0,01707 | --- CDH5        |            |
| 7996264 | -0,88 | -1,84 | 0,02338 | -0,91 | -1,88 | 0,02992 | NM_001795       | ADAM5P     |
| 8146051 | -0,88 | -1,84 | 0,01554 | -1,05 | -2,07 | 0,00353 | NR_001448       | BMP5       |
| 8127193 | -0,88 | -1,84 | 0,03138 | -0,80 | -1,74 | 0,00860 | NM_021073       | ---        |
| 7992131 | -0,88 | -1,84 | 0,10257 | -1,30 | -2,47 | 0,08301 | ---             |            |
| 8128258 | -0,88 | -1,84 | 0,04089 | -0,94 | -1,91 | 0,02315 | --- LAX1        |            |
| 7908968 | -0,88 | -1,84 | 0,01269 | -1,09 | -2,13 | 0,03132 | NM_017773       | LOC200261  |
| 8065363 | -0,88 | -1,84 | 0,12027 | -0,42 | -1,34 | 0,15206 | AF258576 ---    |            |
| 8019937 | -0,88 | -1,84 | 0,21774 | -1,43 | -2,69 | 0,02675 | ---             |            |
| 7938748 | -0,88 | -1,84 | 0,07151 | 0,07  | 1,05  | 0,75591 | --- FBP1        |            |
| 8162502 | -0,88 | -1,84 | 0,00511 | 0,19  | 1,14  | 0,60039 | NM_000507       | NTSR1      |
| 8063942 | -0,88 | -1,84 | 0,01476 | -1,26 | -2,40 | 0,03439 | NM_002531       | OR4D6      |
| 7940175 | -0,88 | -1,84 | 0,17759 | -0,96 | -1,95 | 0,00771 | NM_001004708    | C10orf53   |

|                                  |       |       |         |       |       |         |                                     |                         |
|----------------------------------|-------|-------|---------|-------|-------|---------|-------------------------------------|-------------------------|
| 7927505                          | -0,88 | -1,84 | 0,02375 | -1,32 | -2,49 | 0,09281 | NM_182554                           | CACNA1I                 |
| 8073152                          | -0,88 | -1,84 | 0,06303 | -0,86 | -1,81 | 0,08808 | NM_021096                           | ---                     |
| 8104504                          | -0,88 | -1,84 | 0,04171 | -0,94 | -1,92 | 0,03162 | ---                                 | IHH                     |
| 8059067                          | -0,88 | -1,84 | 0,00861 | -1,45 | -2,73 | 0,01418 | NM_002181                           | DNAH11                  |
| 8131719                          | -0,88 | -1,84 | 0,00110 | -0,90 | -1,87 | 0,00099 | NM_003777                           | ---                     |
| 8111627                          | -0,88 | -1,84 | 0,01952 | -1,88 | -3,67 | 0,02269 | ---                                 | HLA-DRB3                |
| 8178802                          | -0,88 | -1,84 | 0,03010 | 0,94  | 1,92  | 0,02487 | NM_022555                           | ---                     |
| 7924340                          | -0,88 | -1,84 | 0,00084 | -0,94 | -1,92 | 0,05547 | ---                                 | FAM9A                   |
| 8171260                          | -0,88 | -1,84 | 0,02471 | -0,89 | -1,86 | 0,00283 | NM_174951                           | IQCD                    |
| 7966596                          | -0,88 | -1,84 | 0,00569 | -0,47 | -1,38 | 0,16882 | NM_138451                           | C16orf46                |
| 8002992                          | -0,88 | -1,84 | 0,02339 | -0,84 | -1,79 | 0,13190 | NM_152337                           | ---                     |
| 7908595                          | -0,88 | -1,84 | 0,14201 | -0,65 | -1,56 | 0,00638 | ---                                 | ---                     |
| 7923179                          | -0,88 | -1,84 | 0,12547 | -0,92 | -1,90 | 0,01520 | ---                                 | OR5M9                   |
| 7948131                          | -0,88 | -1,84 | 0,02983 | -0,90 | -1,87 | 0,04524 | NM_001004743                        | FAM189A2                |
| 8155734                          | -0,88 | -1,84 | 0,02821 | 1,11  | 2,15  | 0,00470 | NM_004816                           | KIAA1683                |
| 8035435                          | -0,88 | -1,84 | 0,19226 | -0,40 | -1,32 | 0,21882 | NM_001145304                        | CLC                     |
| 8036755                          | -0,88 | -1,84 | 0,09483 | -1,34 | -2,54 | 0,00120 | NM_001828                           | CD200R1L                |
| 8089559                          | -0,88 | -1,84 | 0,32833 | -1,28 | -2,43 | 0,02934 | NM_001008784                        | ---                     |
| 8059799                          | -0,88 | -1,84 | 0,02397 | -2,68 | -6,41 | 0,00002 | ---                                 | ---                     |
| 8121085                          | -0,88 | -1,84 | 0,04827 | -1,26 | -2,39 | 0,00072 | ---                                 | C9orf45                 |
| 8164008                          | -0,88 | -1,84 | 0,12523 | 1,01  | 2,02  | 0,16764 | NR_026677                           | CTAGE6                  |
| 8143601                          | -0,88 | -1,84 | 0,06656 | -0,76 | -1,69 | 0,00012 | NM_178561                           | CA10                    |
| 8016808                          | -0,88 | -1,84 | 0,01387 | -1,20 | -2,30 | 0,09320 | NM_001082533                        | PHKG1                   |
| 8139746                          | -0,88 | -1,84 | 0,05984 | -1,13 | -2,19 | 0,10859 | NM_006213                           | REG1B                   |
| 8053330                          | -0,88 | -1,84 | 0,04008 | -1,38 | -2,61 | 0,00905 | NM_006507                           | MUM1                    |
| 8024255                          | -0,88 | -1,84 | 0,08101 | 1,39  | 2,63  | 0,04411 | NM_032853                           | ---                     |
| 8044760                          | -0,88 | -1,84 | 0,00950 | -1,35 | -2,55 | 0,02262 | ---                                 | ---                     |
| 8123714                          | -0,88 | -1,84 | 0,14463 | -1,33 | -2,52 | 0,01102 | ---                                 | OR52K2                  |
| 7937938                          | -0,88 | -1,84 | 0,01516 | -1,15 | -2,22 | 0,00970 | NM_001005172                        | ---                     |
| 8138440                          | -0,88 | -1,84 | 0,18903 | -0,95 | -1,93 | 0,00270 | ---                                 | ---                     |
| 8121332                          | -0,88 | -1,84 | 0,10608 | 0,03  | 1,02  | 0,81255 | ---                                 | ---                     |
| 8169465                          | -0,88 | -1,84 | 0,15375 | -0,91 | -1,88 | 0,04565 | ---                                 | NEIL1                   |
| 7985001                          | -0,88 | -1,84 | 0,04602 | -0,11 | -1,08 | 0,72398 | NM_024608                           | ---                     |
| 7903028                          | -0,88 | -1,84 | 0,09445 | -0,77 | -1,71 | 0,03357 | ---                                 | MAGEB17                 |
| 8166211                          | -0,88 | -1,84 | 0,15573 | -1,46 | -2,76 | 0,03185 | ENST00000400004                     | ---                     |
| 7981726                          | -0,88 | -1,84 | 0,17185 | -0,93 | -1,91 | 0,02599 | ---                                 | HLA-DPB2                |
| 8118607                          | -0,88 | -1,84 | 0,01264 | -0,42 | -1,34 | 0,22473 | NR_001435                           | ---                     |
| 7958128                          | -0,88 | -1,84 | 0,00085 | -1,08 | -2,11 | 0,02533 | ---                                 | ---                     |
| 7937959                          | -0,88 | -1,84 | 0,09686 | -1,28 | -2,43 | 0,00273 | ---                                 | IGHM // IGHM // IGHM // |
| IGHM // IGHM // IGHM             |       |       |         |       |       |         |                                     |                         |
| 7981718                          | -0,88 | -1,84 | 0,36995 | -3,26 | -9,58 | 0,00001 | BC020240 // BC020240 // BC020240 // |                         |
| BC020240 // BC020240 // BC020240 |       |       |         |       |       |         |                                     |                         |
| 8061416                          | -0,88 | -1,84 | 0,22054 | -1,59 | -3,01 | 0,04716 | NM_003650                           | ---                     |
| 7982390                          | -0,88 | -1,84 | 0,10004 | -0,97 | -1,96 | 0,05707 | ---                                 | NUP62CL                 |
| 8174351                          | -0,88 | -1,84 | 0,11144 | 2,04  | 4,12  | 0,00224 | NM_017681                           | ---                     |
| 8006227                          | -0,88 | -1,84 | 0,07374 | -1,21 | -2,31 | 0,00133 | ---                                 | ---                     |
| 8139017                          | -0,88 | -1,84 | 0,23134 | -0,70 | -1,63 | 0,12521 | ---                                 | STRA13                  |
| 8019350                          | -0,88 | -1,84 | 0,08311 | 1,02  | 2,03  | 0,04341 | NM_144998                           | RESP18                  |
| 8059213                          | -0,88 | -1,85 | 0,11406 | -1,22 | -2,32 | 0,00340 | NM_001007089                        | ---                     |
| 8097116                          | -0,88 | -1,85 | 0,07992 | -0,58 | -1,49 | 0,00520 | ---                                 | GGT6                    |
| 8011671                          | -0,88 | -1,85 | 0,09673 | -1,31 | -2,47 | 0,00024 | NM_001122890                        | SOSTDC1                 |
| 8138363                          | -0,88 | -1,85 | 0,03069 | -2,01 | -4,04 | 0,00261 | NM_015464                           | PRSS2                   |
| 8136807                          | -0,88 | -1,85 | 0,00600 | 0,27  | 1,21  | 0,42956 | NM_002770                           | OR6B2                   |
| 8060080                          | -0,88 | -1,85 | 0,33748 | -1,44 | -2,71 | 0,11137 | NM_001005853                        | MIR181C                 |
| 8026212                          | -0,88 | -1,85 | 0,11268 | -0,92 | -1,89 | 0,07922 | NR_029613                           | CD320                   |
| 8033554                          | -0,88 | -1,85 | 0,07799 | 0,04  | 1,03  | 0,92401 | NM_016579                           | ---                     |
| 7941380                          | -0,88 | -1,85 | 0,06482 | -0,43 | -1,35 | 0,29352 | ---                                 | ---                     |
| 8055639                          | -0,88 | -1,85 | 0,31506 | -1,40 | -2,64 | 0,01014 | ---                                 | DLX2                    |
| 8056784                          | -0,88 | -1,85 | 0,04644 | -1,06 | -2,09 | 0,01280 | NM_004405                           | TYK2                    |
| 8033996                          | -0,88 | -1,85 | 0,01238 | 0,96  | 1,94  | 0,13479 | NM_003331                           | ---                     |
| 8083998                          | -0,88 | -1,85 | 0,00703 | -1,05 | -2,07 | 0,00080 | ---                                 | ISY1                    |
| 8090533                          | -0,89 | -1,85 | 0,23841 | 0,35  | 1,27  | 0,10695 | NM_020701                           | ANKRD33                 |
| 7955551                          | -0,89 | -1,85 | 0,09914 | -1,45 | -2,73 | 0,03205 | NM_001130015                        | ---                     |
| 7933731                          | -0,89 | -1,85 | 0,00867 | -1,10 | -2,14 | 0,01248 | ---                                 | ---                     |
| 8023642                          | -0,89 | -1,85 | 0,00469 | -0,90 | -1,87 | 0,00123 | ---                                 | IL5RA                   |
| 8085062                          | -0,89 | -1,85 | 0,04175 | -1,01 | -2,01 | 0,00024 | NM_000564                           | SNORD83B                |
| 8076219                          | -0,89 | -1,85 | 0,30992 | -2,28 | -4,87 | 0,01442 | NR_000028                           | ---                     |
| 7950469                          | -0,89 | -1,85 | 0,10850 | -1,53 | -2,88 | 0,06007 | ---                                 | ---                     |
| 8169636                          | -0,89 | -1,85 | 0,00376 | -1,13 | -2,19 | 0,00002 | ---                                 | FAM55B                  |
| 7944023                          | -0,89 | -1,85 | 0,00581 | -1,26 | -2,40 | 0,00362 | NM_182495                           | PLEKHF1                 |
| 8027398                          | -0,89 | -1,85 | 0,13270 | -0,95 | -1,94 | 0,02726 | NM_024310                           | FAM104B                 |
| 8173148                          | -0,89 | -1,85 | 0,29105 | -0,13 | -1,09 | 0,70730 | NR_030722                           | GALNTL5                 |
| 8137437                          | -0,89 | -1,85 | 0,00894 | -1,30 | -2,45 | 0,00521 | NR_033169                           | SAA1                    |



|         |       |       |         |       |       |         |                        |                    |
|---------|-------|-------|---------|-------|-------|---------|------------------------|--------------------|
| 7946986 | -0,89 | -1,85 | 0,00010 | -1,35 | -2,56 | 0,00273 | NM_000331              | SERPINA9           |
| 7981084 | -0,89 | -1,85 | 0,10772 | -1,49 | -2,80 | 0,00745 | NM_175739              | NR1I3              |
| 7921840 | -0,89 | -1,85 | 0,06657 | -1,52 | -2,88 | 0,01372 | NM_001077482           | MIR223             |
| 8167971 | -0,89 | -1,85 | 0,04143 | -1,14 | -2,20 | 0,02572 | NR_029637              | MIR138-2           |
| 7995866 | -0,89 | -1,85 | 0,05274 | -1,46 | -2,75 | 0,00553 | NR_029680              | IGSF11             |
| 8089729 | -0,89 | -1,85 | 0,01372 | -0,80 | -1,74 | 0,02207 | NM_001015887           | ---                |
| 8046512 | -0,89 | -1,85 | 0,02805 | -0,35 | -1,27 | 0,07627 | ---                    | SLC7A4             |
| 8074701 | -0,89 | -1,85 | 0,05651 | -1,36 | -2,56 | 0,01257 | NM_004173              | LOC284232          |
| 7970388 | -0,89 | -1,85 | 0,00799 | -1,08 | -2,12 | 0,02657 | NR_027995              | ---                |
| 8068660 | -0,89 | -1,85 | 0,03012 | -0,98 | -1,97 | 0,03952 | ---                    | GLTSCR1            |
| 8029939 | -0,89 | -1,85 | 0,05288 | -0,85 | -1,80 | 0,02784 | NM_015711              | NADK               |
| 7911600 | -0,89 | -1,85 | 0,01210 | 0,92  | 1,90  | 0,05250 | NM_023018              | USP17L2 // USP17L2 |
| 8149356 | -0,89 | -1,85 | 0,53783 | -2,48 | -5,58 | 0,00126 | NM_201402 // NM_201402 | ---                |
| 8081079 | -0,89 | -1,85 | 0,06648 | -0,73 | -1,66 | 0,08055 | ---                    | ---                |
| 7943345 | -0,89 | -1,85 | 0,01582 | -0,68 | -1,60 | 0,05721 | ---                    | MGAT5B             |
| 8010113 | -0,89 | -1,85 | 0,02591 | -0,26 | -1,20 | 0,11376 | NM_144677              | LGALS2             |
| 8075956 | -0,89 | -1,85 | 0,14579 | -1,41 | -2,65 | 0,03113 | NM_006498              | OR2B2              |
| 8124547 | -0,89 | -1,85 | 0,14933 | -1,00 | -2,00 | 0,01373 | NM_033057              | DECR2              |
| 7991846 | -0,89 | -1,85 | 0,01526 | -0,25 | -1,19 | 0,60246 | NM_020664              | MAGEC1             |
| 8170273 | -0,89 | -1,85 | 0,03171 | -0,87 | -1,82 | 0,04832 | NM_005462              | ---                |
| 8081333 | -0,89 | -1,85 | 0,03433 | -1,23 | -2,35 | 0,03110 | ---                    | DNAH2              |
| 8004580 | -0,89 | -1,85 | 0,01024 | -0,57 | -1,48 | 0,00244 | NM_020877              | OAF                |
| 7944530 | -0,89 | -1,85 | 0,00530 | -0,86 | -1,82 | 0,26461 | NM_178507              | EYS                |
| 8127399 | -0,89 | -1,85 | 0,05247 | -0,66 | -1,58 | 0,02036 | NM_001142800           | FBXL17             |
| 8113445 | -0,89 | -1,85 | 0,10216 | -1,04 | -2,06 | 0,05150 | NM_001163315           | IGDCC4             |
| 7989785 | -0,89 | -1,85 | 0,03632 | 0,50  | 1,42  | 0,25335 | NM_020962              | BTLA               |
| 8089519 | -0,89 | -1,85 | 0,21638 | -1,07 | -2,10 | 0,02618 | NM_181780              | PLIN1              |
| 7991313 | -0,89 | -1,85 | 0,10346 | -1,27 | -2,41 | 0,00420 | NM_002666              | ---                |
| 7910012 | -0,89 | -1,85 | 0,04695 | -0,67 | -1,59 | 0,01322 | ---                    | BNC1               |
| 7991080 | -0,89 | -1,85 | 0,00360 | 2,51  | 5,68  | 0,00129 | NM_001717              | ---                |
| 8142230 | -0,89 | -1,85 | 0,01483 | -0,89 | -1,86 | 0,08521 | ---                    | MGC29506           |
| 8114511 | -0,89 | -1,85 | 0,01335 | -0,50 | -1,42 | 0,01746 | NM_016459              | KRT19              |
| 8015349 | -0,89 | -1,85 | 0,03763 | 1,10  | 2,15  | 0,08451 | NM_002276              | ---                |
| 7928748 | -0,89 | -1,85 | 0,10961 | -1,44 | -2,71 | 0,00008 | ---                    | PKD2L1             |
| 7935756 | -0,89 | -1,85 | 0,05278 | -0,77 | -1,83 | 0,00190 | NM_016112              | OR5AR1             |
| 7939992 | -0,89 | -1,85 | 0,25832 | -0,78 | -1,72 | 0,01467 | NM_001004730           | IL17REL            |
| 8076865 | -0,89 | -1,85 | 0,09392 | -1,38 | -2,60 | 0,00054 | NM_001001694           | ZNF705A            |
| 7953733 | -0,89 | -1,85 | 0,09706 | -0,42 | -1,34 | 0,34868 | NM_001004328           | CSF1R              |
| 8115076 | -0,89 | -1,85 | 0,00968 | -0,39 | -1,31 | 0,06172 | NM_005211              | ELSPBP1            |
| 8029988 | -0,89 | -1,85 | 0,12279 | -1,15 | -2,21 | 0,00007 | NM_022142              | C17orf104          |
| 8007643 | -0,89 | -1,85 | 0,07708 | 2,32  | 5,00  | 0,00533 | NM_001145080           | SAFB2              |
| 8032974 | -0,89 | -1,85 | 0,04900 | 0,43  | 1,35  | 0,32491 | NM_014649              | HIPK4              |
| 8036883 | -0,89 | -1,85 | 0,03625 | -1,19 | -2,29 | 0,00986 | NM_144685              | PNLDC1             |
| 8123155 | -0,89 | -1,85 | 0,00022 | -1,12 | -2,17 | 0,01929 | NM_173516              | WDR93              |
| 7985898 | -0,89 | -1,85 | 0,06555 | -0,56 | -1,48 | 0,01425 | NM_020212              | KCNQ1DN            |
| 7937847 | -0,89 | -1,85 | 0,04857 | -2,12 | -4,35 | 0,00347 | NR_024627              | ---                |
| 7919886 | -0,89 | -1,85 | 0,00077 | -0,76 | -1,69 | 0,00323 | ---                    | FLJ30403           |
| 8030838 | -0,89 | -1,85 | 0,07960 | 0,45  | 1,37  | 0,10565 | ENST00000301439        | GPR160             |
| 8083839 | -0,89 | -1,85 | 0,05968 | 1,17  | 2,25  | 0,01605 | NM_014373              | ---                |
| 8164560 | -0,89 | -1,85 | 0,04874 | -0,63 | -1,55 | 0,12365 | ---                    | FLJ46020           |
| 8068350 | -0,89 | -1,85 | 0,18135 | -0,66 | -1,58 | 0,18508 | AK127913               | WDR64              |
| 7910971 | -0,89 | -1,85 | 0,00887 | -1,11 | -2,15 | 0,00025 | NM_144625              | RAB36              |
| 8074880 | -0,89 | -1,85 | 0,11960 | -0,94 | -1,91 | 0,04902 | NM_004914              | FXD2               |
| 7944147 | -0,89 | -1,85 | 0,02250 | -1,93 | -3,81 | 0,00519 | NM_001680              | TEX101             |
| 8029289 | -0,89 | -1,85 | 0,06416 | -1,38 | -2,60 | 0,11535 | NM_031451              | TESC               |
| 7966749 | -0,89 | -1,85 | 0,06193 | 0,77  | 1,70  | 0,05991 | NR_031766              | ---                |
| 7981011 | -0,89 | -1,85 | 0,53472 | -1,98 | -3,95 | 0,00515 | ---                    | TRMT61A            |
| 7977105 | -0,89 | -1,85 | 0,00664 | -0,16 | -1,11 | 0,13203 | NM_152307              | CD300A             |
| 8009653 | -0,89 | -1,85 | 0,19121 | -0,46 | -1,37 | 0,28929 | NM_007261              | TYROBP             |
| 8036224 | -0,89 | -1,85 | 0,13668 | -1,54 | -2,90 | 0,00698 | NM_003332              | PRSS54             |
| 8001682 | -0,89 | -1,85 | 0,02978 | -1,33 | -2,51 | 0,00604 | NM_001080492           | MMRN1              |
| 8096415 | -0,89 | -1,85 | 0,12794 | -1,15 | -2,22 | 0,05683 | NM_007351              | TSHZ2              |
| 8063444 | -0,89 | -1,85 | 0,05303 | -1,17 | -2,26 | 0,05745 | ENST00000371497        | ---                |
| 7970947 | -0,89 | -1,85 | 0,04816 | -0,36 | -1,28 | 0,02339 | ---                    | ---                |
| 7990892 | -0,89 | -1,85 | 0,01657 | -1,92 | -3,79 | 0,00069 | ---                    | CDT1               |
| 7997839 | -0,89 | -1,86 | 0,00841 | -0,55 | -1,46 | 0,16539 | NM_030928              | NKX2-6             |
| 8149820 | -0,89 | -1,86 | 0,04346 | -2,17 | -4,49 | 0,00861 | NM_001136271           | GRIK1              |
| 8068120 | -0,89 | -1,86 | 0,09978 | -0,42 | -1,34 | 0,13982 | NM_000830              | TRYX3              |
| 8143486 | -0,89 | -1,86 | 0,12488 | -0,49 | -1,40 | 0,05389 | NM_001001317           | ---                |
| 7971482 | -0,89 | -1,86 | 0,07219 | -1,33 | -2,52 | 0,02675 | ---                    | CSAG2              |
| 8170580 | -0,89 | -1,86 | 0,01748 | -0,79 | -1,73 | 0,00574 | NM_001080848           | ---                |
| 8156969 | -0,89 | -1,86 | 0,00020 | -0,44 | -1,35 | 0,25044 | ---                    | ---                |
| 8113299 | -0,89 | -1,86 | 0,19029 | -1,28 | -2,43 | 0,00072 | ---                    | WEE1               |

|         |       |       |         |       |       |         |                   |              |
|---------|-------|-------|---------|-------|-------|---------|-------------------|--------------|
| 7938364 | -0,89 | -1,86 | 0,06265 | -1,08 | -2,11 | 0,00991 | BX641032          | ---          |
| 8028309 | -0,89 | -1,86 | 0,00403 | -0,43 | -1,35 | 0,07950 | ---               | ---          |
| 8133165 | -0,89 | -1,86 | 0,03403 | -0,65 | -1,57 | 0,03259 | ---               | NXF2         |
| 8168900 | -0,89 | -1,86 | 0,05386 | -0,73 | -1,65 | 0,00661 | NM_017809         | ---          |
| 8165862 | -0,89 | -1,86 | 0,12417 | -0,68 | -1,61 | 0,00838 | ---               | FLJ45244     |
| 7976512 | -0,89 | -1,86 | 0,07706 | -0,45 | -1,37 | 0,00041 | NR_015415         | ---          |
| 8062569 | -0,89 | -1,86 | 0,00627 | -0,76 | -1,70 | 0,05875 | ---               | LCE1C        |
| 7920193 | -0,89 | -1,86 | 0,43346 | -0,95 | -1,93 | 0,20818 | NM_178351         | SNORD73A     |
| 8097792 | -0,89 | -1,86 | 0,04544 | -0,44 | -1,35 | 0,01044 | NR_000007         | CAPN9        |
| 7910466 | -0,89 | -1,86 | 0,05294 | -1,08 | -2,11 | 0,00213 | NM_006615         | AMPD2        |
| 7903719 | -0,89 | -1,86 | 0,04944 | 0,50  | 1,41  | 0,36325 | NM_004037         | ---          |
| 8046790 | -0,89 | -1,86 | 0,05864 | -1,01 | -2,01 | 0,01550 | ---               | GLI4         |
| 8148607 | -0,89 | -1,86 | 0,01473 | -0,12 | -1,09 | 0,77043 | NM_138465         | ---          |
| 8027377 | -0,89 | -1,86 | 0,12363 | -1,72 | -3,30 | 0,04188 | ---               | OR4C15       |
| 7939924 | -0,89 | -1,86 | 0,08936 | -0,81 | -1,75 | 0,00725 | NM_001001920      | OR5M8        |
| 7948137 | -0,89 | -1,86 | 0,07918 | -1,81 | -3,51 | 0,00024 | NM_001005282      | SLC22A15     |
| 7904226 | -0,89 | -1,86 | 0,00924 | 0,13  | 1,09  | 0,73013 | NM_018420         | ---          |
| 7965976 | -0,89 | -1,86 | 0,00050 | 0,11  | 1,08  | 0,64893 | ---               | TTN          |
| 8057056 | -0,89 | -1,86 | 0,00215 | -1,07 | -2,10 | 0,00001 | NM_133378         | LAIR1        |
| 8039257 | -0,89 | -1,86 | 0,01629 | -1,26 | -2,39 | 0,00997 | NM_002287         | SIX3         |
| 8041759 | -0,89 | -1,86 | 0,16851 | -0,58 | -1,50 | 0,16573 | NM_005413         | ADAMTS16     |
| 8104321 | -0,89 | -1,86 | 0,06280 | -0,43 | -1,35 | 0,45139 | NM_139056         | SNX31        |
| 8152062 | -0,89 | -1,86 | 0,05284 | -0,61 | -1,52 | 0,08519 | NM_152628         | OR52R1       |
| 7946001 | -0,89 | -1,86 | 0,08757 | -0,70 | -1,62 | 0,02424 | NM_001005177      | PLAC1L       |
| 7940210 | -0,89 | -1,86 | 0,12520 | -1,18 | -2,27 | 0,00162 | NM_173801         | ---          |
| 8145083 | -0,89 | -1,86 | 0,15578 | -1,00 | -2,00 | 0,05000 | ---               | POTEE        |
| 8055222 | -0,89 | -1,86 | 0,02602 | -1,84 | -3,57 | 0,00069 | NM_001083538      | TBC1D10A     |
| 8075332 | -0,89 | -1,86 | 0,01978 | 0,13  | 1,10  | 0,78794 | NM_031937         | CLCA3P       |
| 7902754 | -0,89 | -1,86 | 0,01023 | -1,37 | -2,58 | 0,00027 | NR_024604         | ---          |
| 8120163 | -0,89 | -1,86 | 0,05349 | -0,41 | -1,33 | 0,02487 | ---               | HIST3H2A     |
| 7924888 | -0,89 | -1,86 | 0,04210 | -0,90 | -1,87 | 0,10759 | NM_033445         | SCRT2        |
| 8064384 | -0,89 | -1,86 | 0,04023 | -2,29 | -4,90 | 0,00115 | NM_033129         | ADAMTSL1     |
| 8154512 | -0,89 | -1,86 | 0,13994 | -0,95 | -1,93 | 0,00126 | NM_001040272      | ---          |
| 7922652 | -0,89 | -1,86 | 0,10132 | -1,43 | -2,70 | 0,00357 | ---               | ENTPD8       |
| 8165538 | -0,90 | -1,86 | 0,00861 | -0,10 | -1,07 | 0,76322 | NM_001033113      | RTEL1        |
| 8064111 | -0,90 | -1,86 | 0,04823 | -0,14 | -1,10 | 0,61492 | NM_032957         | ---          |
| 8118820 | -0,90 | -1,86 | 0,18818 | -1,25 | -2,38 | 0,01071 | ---               | OR13J1       |
| 8161164 | -0,90 | -1,86 | 0,15105 | -1,43 | -2,70 | 0,02021 | NM_001004487      | KIAA1804     |
| 7910600 | -0,90 | -1,86 | 0,02383 | 1,67  | 3,17  | 0,01138 | NM_032435         | CABP1        |
| 7959195 | -0,90 | -1,86 | 0,03522 | -1,82 | -3,54 | 0,00007 | NM_001033677      | GAGE12J      |
| 8167508 | -0,90 | -1,86 | 0,43224 | -2,00 | -4,01 | 0,01240 | NM_001098406      | ---          |
| 8174668 | -0,90 | -1,86 | 0,00159 | -0,92 | -1,89 | 0,07406 | ---               | ---          |
| 8166657 | -0,90 | -1,86 | 0,02464 | -1,53 | -2,89 | 0,00260 | ---               | CASKIN1      |
| 7998724 | -0,90 | -1,86 | 0,03913 | -0,51 | -1,42 | 0,03927 | NM_020764         | UGT1A1       |
| 8049349 | -0,90 | -1,86 | 0,00277 | -0,85 | -1,80 | 0,01351 | NM_000463         | ---          |
| 8138822 | -0,90 | -1,86 | 0,05944 | -1,39 | -2,63 | 0,09052 | ---               | AP1G2        |
| 7978066 | -0,90 | -1,86 | 0,02185 | 1,23  | 2,34  | 0,04221 | NM_003917         | C14orf181    |
| 7979820 | -0,90 | -1,86 | 0,02280 | -1,25 | -2,37 | 0,04808 | NM_207442         | ---          |
| 8046014 | -0,90 | -1,86 | 0,04363 | -1,47 | -2,78 | 0,01080 | ---               | LOC100132147 |
| 7912804 | -0,90 | -1,86 | 0,35032 | -3,21 | -9,27 | 0,00033 | BC036435 IL1F8    | ---          |
| 8054731 | -0,90 | -1,86 | 0,00173 | -1,00 | -2,00 | 0,03596 | NM_014438         | CD40LG       |
| 8170187 | -0,90 | -1,86 | 0,00637 | -0,45 | -1,36 | 0,07641 | NM_000074         | PRY          |
| 8177323 | -0,90 | -1,86 | 0,07575 | -1,42 | -2,68 | 0,00548 | NM_004676         | ---          |
| 7926123 | -0,90 | -1,86 | 0,05338 | -0,85 | -1,80 | 0,25891 | ---               | CD80         |
| 8089771 | -0,90 | -1,86 | 0,00643 | -1,11 | -2,15 | 0,05287 | NM_005191         | ---          |
| 8099758 | -0,90 | -1,86 | 0,02041 | -0,71 | -1,64 | 0,02089 | ---               | BNIPL        |
| 7905308 | -0,90 | -1,86 | 0,09297 | -0,33 | -1,26 | 0,14704 | NM_001159642      | SNORD116-21  |
| 7981990 | -0,90 | -1,86 | 0,05625 | -0,08 | -1,06 | 0,87614 | NR_003335         | ---          |
| 8074789 | -0,90 | -1,86 | 0,01161 | -1,26 | -2,39 | 0,00022 | ---               | ---          |
| 8115863 | -0,90 | -1,86 | 0,08124 | -1,06 | -2,09 | 0,12485 | ---               | PDE10A       |
| 8130674 | -0,90 | -1,86 | 0,07885 | -1,54 | -2,91 | 0,02120 | NM_006661         | CDRT1        |
| 8012931 | -0,90 | -1,86 | 0,22768 | -0,88 | -1,84 | 0,17474 | NM_006382         | ---          |
| 8147652 | -0,90 | -1,86 | 0,00893 | -0,87 | -1,82 | 0,00020 | ---               | ---          |
| 7927639 | -0,90 | -1,86 | 0,06543 | -1,75 | -3,37 | 0,00180 | ---               | ---          |
| 8151508 | -0,90 | -1,86 | 0,03946 | -1,75 | -3,37 | 0,00227 | ---               | SCLY         |
| 8049582 | -0,90 | -1,86 | 0,01959 | 1,16  | 2,24  | 0,05561 | NM_016510         | C3orf25      |
| 8090567 | -0,90 | -1,86 | 0,02502 | -1,10 | -2,14 | 0,00302 | BC066975          | ---          |
| 8140033 | -0,90 | -1,86 | 0,04873 | -1,03 | -2,04 | 0,00016 | ---               | MIR142       |
| 8016980 | -0,90 | -1,86 | 0,00944 | -1,14 | -2,20 | 0,00466 | NR_029683         | C2orf15      |
| 8043835 | -0,90 | -1,86 | 0,00315 | 2,10  | 4,29  | 0,00824 | BC021264 CEACAM21 | ---          |
| 8029076 | -0,90 | -1,86 | 0,00108 | -0,91 | -1,88 | 0,03252 | NM_001098506      | CCDC64       |
| 7959131 | -0,90 | -1,86 | 0,02570 | 0,71  | 1,64  | 0,21955 | NM_207311         | ---          |
| 8089926 | -0,90 | -1,86 | 0,15934 | -1,26 | -2,39 | 0,01707 | ---               | SHROOM4      |

|         |       |       |         |       |       |         |                 |               |
|---------|-------|-------|---------|-------|-------|---------|-----------------|---------------|
| 8172698 | -0,90 | -1,86 | 0,02787 | -0,87 | -1,83 | 0,05529 | NR_027121       | AQP7P1        |
| 8161558 | -0,90 | -1,86 | 0,22195 | -2,07 | -4,21 | 0,01852 | NR_002817       | OR13H1        |
| 8169947 | -0,90 | -1,86 | 0,17933 | -0,41 | -1,33 | 0,17548 | NM_001004486    | ---           |
| 8096331 | -0,90 | -1,86 | 0,03463 | -1,77 | -3,42 | 0,00880 | ---             | hCG_2011852   |
| 7972670 | -0,90 | -1,86 | 0,06388 | -0,90 | -1,87 | 0,00055 | ENST00000322527 | RERGL         |
| 7961595 | -0,90 | -1,86 | 0,00498 | -0,56 | -1,48 | 0,22185 | NM_024730       | EMX2          |
| 7930857 | -0,90 | -1,86 | 0,13006 | -1,63 | -3,09 | 0,01253 | NM_004098       | ZCCHC13       |
| 8168420 | -0,90 | -1,86 | 0,23845 | -0,47 | -1,38 | 0,21443 | NM_203303       | LOC100128003  |
| 7897066 | -0,90 | -1,86 | 0,04725 | -1,07 | -2,09 | 0,07189 | NR_024445       | STOX1         |
| 7927915 | -0,90 | -1,86 | 0,00846 | 2,85  | 7,20  | 0,00037 | NM_152709       | DGCR6         |
| 8071179 | -0,90 | -1,86 | 0,08010 | -1,20 | -2,29 | 0,28682 | NM_005675       | SRL           |
| 7999093 | -0,90 | -1,86 | 0,15818 | -0,79 | -1,74 | 0,02025 | NM_001098814    | FBXO16        |
| 8150002 | -0,90 | -1,86 | 0,00627 | 2,68  | 6,43  | 0,00304 | NM_172366       | ---           |
| 8083790 | -0,90 | -1,86 | 0,07113 | -1,18 | -2,26 | 0,00029 | ---             | LOC645339     |
| 7925058 | -0,90 | -1,86 | 0,08583 | -0,89 | -1,85 | 0,05905 | BC014600 P2RY13 | ---           |
| 8091523 | -0,90 | -1,87 | 0,07923 | -1,11 | -2,16 | 0,01118 | NM_176894       | ---           |
| 7963758 | -0,90 | -1,87 | 0,12408 | -0,95 | -1,94 | 0,01543 | ---             | ---           |
| 7943709 | -0,90 | -1,87 | 0,07912 | -0,99 | -1,98 | 0,00354 | ---             | AGRN          |
| 7896822 | -0,90 | -1,87 | 0,06140 | 1,86  | 3,64  | 0,06465 | NM_198576       | ---           |
| 8092199 | -0,90 | -1,87 | 0,07337 | -0,76 | -1,69 | 0,00049 | ---             | NOTCH4        |
| 8125383 | -0,90 | -1,87 | 0,05758 | -1,66 | -3,16 | 0,00044 | NM_004557       | PRAMEF15      |
| 7898012 | -0,90 | -1,87 | 0,31289 | -1,04 | -2,05 | 0,01302 | NM_001098376    | PRAMEF15      |
| 7898040 | -0,90 | -1,87 | 0,31289 | -1,04 | -2,05 | 0,01302 | NM_001098376    | PON1          |
| 8141052 | -0,90 | -1,87 | 0,05338 | 0,00  | -1,00 | 0,99976 | NM_000446       | BOP1          |
| 8153664 | -0,90 | -1,87 | 0,01344 | 1,29  | 2,44  | 0,02231 | NM_015201       | TTC25         |
| 8007176 | -0,90 | -1,87 | 0,02573 | -0,34 | -1,27 | 0,48128 | NM_031421       | SLC22A23      |
| 8123658 | -0,90 | -1,87 | 0,03496 | -0,13 | -1,09 | 0,75833 | NM_015482       | SLC30A2       |
| 7913896 | -0,90 | -1,87 | 0,04951 | -1,58 | -2,98 | 0,00634 | NM_001004434    | FLYWCH1       |
| 7992744 | -0,90 | -1,87 | 0,01098 | -0,55 | -1,46 | 0,12125 | NM_032296       | ---           |
| 8164426 | -0,90 | -1,87 | 0,05112 | -1,53 | -2,88 | 0,02427 | ---             | ---           |
| 7924443 | -0,90 | -1,87 | 0,00100 | -1,45 | -2,72 | 0,00252 | ---             | ALOX5         |
| 7927215 | -0,90 | -1,87 | 0,08511 | -0,44 | -1,36 | 0,13197 | NM_000698       | AGAP4         |
| 7927231 | -0,90 | -1,87 | 0,17720 | 1,32  | 2,49  | 0,03688 | NM_133446       | JMJD7-PLA2G4B |
| 7983021 | -0,90 | -1,87 | 0,03773 | -0,40 | -1,32 | 0,21330 | NR_015346       | C16orf54      |
| 8000702 | -0,90 | -1,87 | 0,03748 | -1,29 | -2,44 | 0,03729 | NM_175900       | C16orf54      |
| 8003601 | -0,90 | -1,87 | 0,03748 | -1,29 | -2,44 | 0,03729 | NM_175900       | NBPF22P       |
| 8106771 | -0,90 | -1,87 | 0,29391 | -0,61 | -1,53 | 0,52188 | NR_003719       | ---           |
| 8070295 | -0,90 | -1,87 | 0,18434 | -1,44 | -2,72 | 0,00236 | ---             | RAMP3         |
| 8132660 | -0,90 | -1,87 | 0,02220 | -0,97 | -1,96 | 0,01060 | NM_005856       | ---           |
| 7915657 | -0,90 | -1,87 | 0,07337 | -0,97 | -1,96 | 0,04592 | ---             | ---           |
| 7998249 | -0,90 | -1,87 | 0,00817 | -1,55 | -2,92 | 0,00213 | ---             | ---           |
| 8004219 | -0,90 | -1,87 | 0,14966 | -1,49 | -2,80 | 0,02235 | ---             | ADORA3        |
| 7918533 | -0,90 | -1,87 | 0,11391 | -1,30 | -2,47 | 0,00128 | NM_020683       | FLJ43390      |
| 7974895 | -0,90 | -1,87 | 0,01880 | -1,26 | -2,40 | 0,06755 | NR_015358       | ---           |
| 7959014 | -0,90 | -1,87 | 0,08087 | -0,96 | -1,95 | 0,01086 | ---             | TRMT5         |
| 7974814 | -0,90 | -1,87 | 0,05266 | -1,27 | -2,40 | 0,00975 | NM_020810       | SGSM2         |
| 8003733 | -0,90 | -1,87 | 0,09887 | 1,14  | 2,20  | 0,00970 | NM_014853       | CHST4         |
| 7997152 | -0,90 | -1,87 | 0,12835 | -1,02 | -2,03 | 0,00765 | NM_001166395    | ---           |
| 7948371 | -0,90 | -1,87 | 0,00339 | -1,07 | -2,09 | 0,00491 | ---             | VWF           |
| 7960464 | -0,90 | -1,87 | 0,01887 | -1,27 | -2,40 | 0,00002 | NM_000552       | CCL18         |
| 8006594 | -0,90 | -1,87 | 0,00953 | -0,99 | -1,99 | 0,00087 | NM_002988       | ---           |
| 8029375 | -0,90 | -1,87 | 0,08057 | -1,44 | -2,71 | 0,02614 | ---             | CDH23         |
| 7928218 | -0,90 | -1,87 | 0,03961 | -1,17 | -2,24 | 0,00235 | NM_022124       | LOC131055     |
| 8083777 | -0,90 | -1,87 | 0,00676 | -0,65 | -1,57 | 0,09543 | ENST00000407723 | ---           |
| 7917737 | -0,90 | -1,87 | 0,34562 | -0,43 | -1,35 | 0,05691 | ---             | ZSCAN5A       |
| 8039577 | -0,90 | -1,87 | 0,02960 | -0,27 | -1,20 | 0,17651 | NM_024303       | ---           |
| 7948416 | -0,90 | -1,87 | 0,18938 | -1,09 | -2,13 | 0,00060 | ---             | ---           |
| 7978822 | -0,90 | -1,87 | 0,06098 | -0,87 | -1,82 | 0,07938 | ---             | RIPPLY2       |
| 8120937 | -0,90 | -1,87 | 0,13576 | -0,58 | -1,49 | 0,05419 | NM_001009994    | ---           |
| 7997724 | -0,90 | -1,87 | 0,09841 | -1,00 | -2,00 | 0,03228 | ---             | INSL4         |
| 8154229 | -0,90 | -1,87 | 0,00307 | -1,06 | -2,09 | 0,00255 | NM_002195       | MIR519A2      |
| 8031045 | -0,90 | -1,87 | 0,03026 | -0,84 | -1,79 | 0,00216 | NR_030222       | ---           |
| 8109967 | -0,90 | -1,87 | 0,00641 | -2,42 | -5,35 | 0,01687 | ---             | ---           |
| 7937800 | -0,90 | -1,87 | 0,21410 | -1,84 | -3,59 | 0,01744 | ---             | LOC283693     |
| 7991017 | -0,90 | -1,87 | 0,17969 | -0,95 | -1,93 | 0,02685 | BC020234 ARR3   | ---           |
| 8168117 | -0,90 | -1,87 | 0,01057 | -1,22 | -2,33 | 0,00901 | NM_004312       | RGS14         |
| 8110327 | -0,90 | -1,87 | 0,13375 | -0,64 | -1,56 | 0,12617 | NM_006480       | DSCR4         |
| 8070286 | -0,90 | -1,87 | 0,09490 | -1,63 | -3,10 | 0,00016 | NM_005867       | TAS2R1        |
| 8110960 | -0,90 | -1,87 | 0,04292 | -1,07 | -2,11 | 0,02042 | NM_019599       | ASXL3         |
| 8020844 | -0,90 | -1,87 | 0,07862 | -1,52 | -2,86 | 0,01136 | NM_030632       | RP1L1         |
| 8149283 | -0,90 | -1,87 | 0,09300 | -0,97 | -1,96 | 0,05236 | NM_178857       | PDE6H         |
| 7954136 | -0,90 | -1,87 | 0,22503 | -1,78 | -3,44 | 0,00221 | NM_006205       | ZP2           |
| 8000097 | -0,90 | -1,87 | 0,02047 | -0,93 | -1,91 | 0,00773 | NM_003460       | OR5B3         |

|         |       |       |         |       |        |         |                 |           |
|---------|-------|-------|---------|-------|--------|---------|-----------------|-----------|
| 7948324 | -0,90 | -1,87 | 0,03284 | -0,91 | -1,88  | 0,00201 | NM_001005469    | ---       |
| 7981872 | -0,90 | -1,87 | 0,31089 | -1,56 | -2,95  | 0,01314 | ---             | KRTAP19-6 |
| 8069841 | -0,90 | -1,87 | 0,00008 | -1,41 | -2,66  | 0,01003 | NM_181612       | SPACA1    |
| 8121066 | -0,90 | -1,87 | 0,00684 | -1,03 | -2,04  | 0,00942 | NM_030960       | CUBN      |
| 7932326 | -0,90 | -1,87 | 0,06333 | -0,59 | -1,50  | 0,09673 | NM_001081       | ---       |
| 7962557 | -0,90 | -1,87 | 0,01303 | -1,20 | -2,29  | 0,00187 | ---             | LY9       |
| 7906622 | -0,90 | -1,87 | 0,02432 | 0,13  | 1,09   | 0,36484 | NM_002348       | FAM38A    |
| 7997827 | -0,91 | -1,87 | 0,01333 | -0,66 | -1,58  | 0,08000 | NM_001142864    | C6orf15   |
| 8178439 | -0,91 | -1,87 | 0,13214 | -1,30 | -2,47  | 0,00251 | NM_014070       | FAM95B1   |
| 8155418 | -0,91 | -1,87 | 0,13141 | -1,40 | -2,63  | 0,03462 | AL833349        | ---       |
| 8074192 | -0,91 | -1,87 | 0,30238 | -4,08 | -16,92 | 0,00187 | ---             | MST1P9    |
| 7912863 | -0,91 | -1,87 | 0,05808 | 0,47  | 1,38   | 0,28946 | NR_002729       | AGMAT     |
| 7912659 | -0,91 | -1,87 | 0,00467 | -0,92 | -1,89  | 0,09019 | NM_024758       | FPR2      |
| 8030860 | -0,91 | -1,87 | 0,18550 | -1,33 | -2,51  | 0,00237 | NM_001462       | OR52D1    |
| 7938008 | -0,91 | -1,87 | 0,08542 | -1,69 | -3,22  | 0,01009 | NM_001005163    | SNORD59B  |
| 7964246 | -0,91 | -1,87 | 0,07033 | -0,51 | -1,43  | 0,11031 | NR_003046       | ---       |
| 8137470 | -0,91 | -1,87 | 0,08218 | -0,99 | -1,98  | 0,02535 | ---             | ZCCHC12   |
| 8169598 | -0,91 | -1,87 | 0,11686 | -1,92 | -3,78  | 0,00006 | NM_173798       | PYDC1     |
| 8001037 | -0,91 | -1,87 | 0,04741 | -1,40 | -2,64  | 0,04719 | NM_152901       | ANKRD34C  |
| 7985238 | -0,91 | -1,87 | 0,21722 | -0,91 | -1,88  | 0,02365 | NM_001146341    | ---       |
| 7917910 | -0,91 | -1,87 | 0,17300 | -1,42 | -2,68  | 0,00376 | ---             | RASSF9    |
| 7965226 | -0,91 | -1,87 | 0,00183 | -0,67 | -1,59  | 0,01446 | NM_005447       | ---       |
| 8082238 | -0,91 | -1,87 | 0,24225 | -2,61 | -6,10  | 0,00432 | ---             | ---       |
| 8174281 | -0,91 | -1,87 | 0,01888 | -0,99 | -1,98  | 0,02964 | ---             | OR7E125P  |
| 8149148 | -0,91 | -1,87 | 0,56559 | -3,34 | -10,16 | 0,00002 | ENST00000420198 | ODF4      |
| 8004861 | -0,91 | -1,87 | 0,10529 | -1,27 | -2,42  | 0,00880 | NM_153007       | MYL3      |
| 8086689 | -0,91 | -1,87 | 0,09132 | -0,68 | -1,61  | 0,14743 | NM_000258       | VSIG6     |
| 7986639 | -0,91 | -1,87 | 0,15260 | -2,28 | -4,85  | 0,01475 | ENST00000338567 | AGER      |
| 8125341 | -0,91 | -1,87 | 0,17864 | -0,20 | -1,15  | 0,51740 | NM_001136       | SOX15     |
| 8012220 | -0,91 | -1,87 | 0,05034 | -0,94 | -1,91  | 0,00706 | NM_006942       | KIAA1751  |
| 7911659 | -0,91 | -1,87 | 0,03475 | -0,73 | -1,66  | 0,05110 | ENST00000270720 | ---       |
| 8149823 | -0,91 | -1,88 | 0,00653 | -1,18 | -2,26  | 0,05537 | ---             | ANAPC11   |
| 8010686 | -0,91 | -1,88 | 0,09113 | -0,11 | -1,08  | 0,60206 | NM_001002244    | C10orf114 |
| 7932495 | -0,91 | -1,88 | 0,12256 | -0,42 | -1,34  | 0,15806 | NM_001010911    | DHX38     |
| 7997197 | -0,91 | -1,88 | 0,00469 | 0,42  | 1,34   | 0,36961 | NM_014003       | DAZ2      |
| 8176832 | -0,91 | -1,88 | 0,02650 | -1,38 | -2,60  | 0,00141 | NM_020363       | DAZ1      |
| 8176878 | -0,91 | -1,88 | 0,02650 | -1,38 | -2,60  | 0,00141 | NM_004081       | DAZ1      |
| 8177354 | -0,91 | -1,88 | 0,02650 | -1,38 | -2,60  | 0,00141 | NM_004081       | OR7E125P  |
| 8144422 | -0,91 | -1,88 | 0,54106 | -3,33 | -10,04 | 0,00003 | ENST00000420198 | NXNL2     |
| 8156274 | -0,91 | -1,88 | 0,12612 | -1,98 | -3,96  | 0,00694 | NM_145283       | KIAA1161  |
| 8160786 | -0,91 | -1,88 | 0,02026 | 1,37  | 2,58   | 0,00347 | NM_020702       | DMBX1     |
| 7901247 | -0,91 | -1,88 | 0,19256 | -1,40 | -2,63  | 0,01696 | NM_172225       | RENBP     |
| 8175933 | -0,91 | -1,88 | 0,01316 | -1,16 | -2,24  | 0,05037 | NM_002910       | ---       |
| 8058386 | -0,91 | -1,88 | 0,11922 | -1,00 | -2,00  | 0,04691 | ---             | APOH      |
| 8017766 | -0,91 | -1,88 | 0,00815 | -0,51 | -1,42  | 0,06785 | NM_000042       | ---       |
| 7957833 | -0,91 | -1,88 | 0,00438 | -1,00 | -2,00  | 0,01927 | ---             | ESRP1     |
| 8147351 | -0,91 | -1,88 | 0,03438 | 4,52  | 23,02  | 0,00001 | NM_017697       | BCL2L2    |
| 7973377 | -0,91 | -1,88 | 0,23652 | 0,08  | 1,06   | 0,68500 | NM_004050       | CYP7B1    |
| 8151056 | -0,91 | -1,88 | 0,00337 | -1,48 | -2,78  | 0,00266 | NM_004820       | KIR2DL1   |
| 8031297 | -0,91 | -1,88 | 0,22518 | -2,17 | -4,51  | 0,00050 | NM_014218       | DNAH6     |
| 8043071 | -0,91 | -1,88 | 0,00014 | -0,96 | -1,95  | 0,01243 | NM_001370       | EFTUD1    |
| 7985555 | -0,91 | -1,88 | 0,42205 | 2,27  | 4,81   | 0,00250 | NM_024580       | NKX6-2    |
| 7937106 | -0,91 | -1,88 | 0,00913 | -0,75 | -1,68  | 0,03595 | NM_177400       | OR7A5     |
| 8034892 | -0,91 | -1,88 | 0,00538 | -1,10 | -2,14  | 0,01065 | NM_017506       | FBXO47    |
| 8014757 | -0,91 | -1,88 | 0,00747 | -0,73 | -1,65  | 0,01987 | NM_001008777    | ---       |
| 8038023 | -0,91 | -1,88 | 0,05276 | -0,91 | -1,88  | 0,01303 | ---             | CLRN1     |
| 8091491 | -0,91 | -1,88 | 0,03367 | -0,81 | -1,76  | 0,00038 | NM_052995       | DNAH3     |
| 8000034 | -0,91 | -1,88 | 0,00745 | -0,67 | -1,59  | 0,00386 | NM_017539       | ---       |
| 8106168 | -0,91 | -1,88 | 0,00100 | -1,08 | -2,12  | 0,00540 | ---             | ---       |
| 8171535 | -0,91 | -1,88 | 0,05430 | -0,45 | -1,37  | 0,21308 | ---             | C17orf46  |
| 8016187 | -0,91 | -1,88 | 0,01580 | -1,39 | -2,62  | 0,02408 | NM_152343       | EXOSC6    |
| 8002344 | -0,91 | -1,88 | 0,13576 | -1,31 | -2,48  | 0,00251 | NM_058219       | PHYHIPL   |
| 7927694 | -0,91 | -1,88 | 0,17432 | -0,44 | -1,35  | 0,31269 | NM_032439       | ---       |
| 7975770 | -0,91 | -1,88 | 0,00144 | -0,86 | -1,81  | 0,11190 | ---             | ---       |
| 8096077 | -0,91 | -1,88 | 0,21610 | -0,58 | -1,50  | 0,09242 | ---             | LOC400965 |
| 8043320 | -0,91 | -1,88 | 0,05719 | -0,97 | -1,96  | 0,04181 | AK098018        | C17orf76  |
| 8013022 | -0,91 | -1,88 | 0,03393 | -0,36 | -1,29  | 0,19757 | NM_001113567    | SLC9A11   |
| 7922353 | -0,91 | -1,88 | 0,00277 | -1,22 | -2,34  | 0,00719 | NM_178527       | ---       |
| 8066275 | -0,91 | -1,88 | 0,00471 | -0,66 | -1,58  | 0,00835 | ---             | ---       |
| 7971901 | -0,91 | -1,88 | 0,01229 | -1,21 | -2,32  | 0,00581 | ---             | PIK3R6    |
| 8012539 | -0,91 | -1,88 | 0,10733 | -1,32 | -2,49  | 0,09347 | NM_001010855    | STAC2     |
| 8014812 | -0,91 | -1,88 | 0,05037 | -0,44 | -1,35  | 0,26510 | NM_198993       | MIR34C    |
| 7943738 | -0,91 | -1,88 | 0,04862 | -0,87 | -1,83  | 0,01160 | NR_029840       | MS4A8B    |

|         |       |       |         |       |       |         |                 |              |
|---------|-------|-------|---------|-------|-------|---------|-----------------|--------------|
| 7940323 | -0,91 | -1,88 | 0,00042 | -1,48 | -2,78 | 0,00247 | NM_031457       | PKMYT1       |
| 7998886 | -0,91 | -1,88 | 0,03070 | 0,20  | 1,15  | 0,67792 | NM_182687       | C6orf221     |
| 8120675 | -0,91 | -1,88 | 0,00664 | -0,98 | -1,97 | 0,05621 | NM_001017361    | ---          |
| 7983938 | -0,91 | -1,88 | 0,02036 | 0,25  | 1,19  | 0,67697 | --- OR13C2      | ---          |
| 8162936 | -0,91 | -1,88 | 0,19187 | -0,54 | -1,45 | 0,22045 | NM_001004481    | TFAP2A       |
| 8123864 | -0,91 | -1,88 | 0,23782 | 3,74  | 13,37 | 0,00146 | NM_003220       | GSG1         |
| 7961399 | -0,91 | -1,88 | 0,06993 | -0,80 | -1,74 | 0,00125 | NM_001080554    | ---          |
| 8016504 | -0,91 | -1,88 | 0,15237 | -0,79 | -1,73 | 0,00007 | ---             | ---          |
| 8022970 | -0,91 | -1,88 | 0,02559 | -0,83 | -1,78 | 0,00417 | --- HRNBP3      | ---          |
| 8018993 | -0,91 | -1,88 | 0,04091 | -1,22 | -2,34 | 0,00313 | NM_001082575    | OR8B12       |
| 7952406 | -0,91 | -1,88 | 0,07219 | -0,78 | -1,72 | 0,02867 | NM_001005195    | WT1          |
| 7947363 | -0,91 | -1,88 | 0,29009 | -1,70 | -3,25 | 0,00157 | NM_024424       | PRAMEF3      |
| 7897997 | -0,91 | -1,88 | 0,06675 | -2,15 | -4,44 | 0,00031 | NM_001013692    | FNDC5        |
| 7914580 | -0,91 | -1,88 | 0,01798 | -0,13 | -1,10 | 0,44753 | NM_001171941    | IL1F7        |
| 8044532 | -0,91 | -1,88 | 0,12192 | -1,67 | -3,18 | 0,00266 | NM_014439       | NOX3         |
| 8130447 | -0,91 | -1,88 | 0,08612 | -1,55 | -2,92 | 0,01043 | NM_015718       | ---          |
| 8132847 | -0,91 | -1,88 | 0,11388 | -2,21 | -4,62 | 0,03057 | --- GRHL1       | ---          |
| 8040190 | -0,91 | -1,88 | 0,14597 | 0,81  | 1,76  | 0,04762 | NM_198182       | DDX53        |
| 8166440 | -0,91 | -1,88 | 0,00928 | -1,58 | -2,99 | 0,00202 | NM_182699       | DOK2         |
| 8149638 | -0,91 | -1,88 | 0,02518 | -0,80 | -1,74 | 0,01041 | NM_003974       | CHRNA6       |
| 8150550 | -0,91 | -1,88 | 0,08016 | -0,41 | -1,33 | 0,05677 | NM_004198       | ---          |
| 8052303 | -0,91 | -1,88 | 0,04231 | -1,71 | -3,27 | 0,00665 | --- KIAA1920    | ---          |
| 7991106 | -0,91 | -1,88 | 0,12885 | -1,25 | -2,38 | 0,04836 | AB067507        | ---          |
| 8055670 | -0,91 | -1,88 | 0,00183 | -0,80 | -1,74 | 0,03487 | --- DNAH17      | ---          |
| 8018908 | -0,91 | -1,88 | 0,01865 | -0,81 | -1,76 | 0,05495 | NM_173628       | NCRNA00173   |
| 7959016 | -0,91 | -1,88 | 0,03697 | -1,28 | -2,43 | 0,00839 | NR_027345       | ---          |
| 8078565 | -0,91 | -1,88 | 0,08445 | -0,70 | -1,63 | 0,07531 | ---             | ---          |
| 8115541 | -0,91 | -1,88 | 0,03316 | -0,89 | -1,85 | 0,01530 | --- ILVBL       | ---          |
| 8034920 | -0,91 | -1,88 | 0,00724 | 0,37  | 1,29  | 0,54223 | NM_006844       | OR2L5        |
| 7911248 | -0,91 | -1,88 | 0,02880 | -2,12 | -4,33 | 0,00002 | ENST00000355281 | UGT2B4       |
| 8100784 | -0,91 | -1,88 | 0,20539 | -0,70 | -1,62 | 0,00712 | NM_021139       | PASK         |
| 8060205 | -0,91 | -1,88 | 0,08729 | -0,36 | -1,28 | 0,10726 | NM_015148       | SNORD115-48  |
| 7982096 | -0,91 | -1,88 | 0,03972 | -0,38 | -1,30 | 0,00512 | NR_003362       | ---          |
| 8046279 | -0,91 | -1,88 | 0,15690 | 0,44  | 1,36  | 0,43997 | --- SOX30       | ---          |
| 8115516 | -0,91 | -1,88 | 0,04854 | -0,72 | -1,65 | 0,11919 | NM_178424       | CYP21A2      |
| 8178177 | -0,91 | -1,88 | 0,06457 | -0,64 | -1,56 | 0,23855 | NM_000500       | CYP21A2      |
| 8179440 | -0,91 | -1,88 | 0,06457 | -0,64 | -1,56 | 0,23855 | NM_000500       | LOC100129648 |
| 8076327 | -0,91 | -1,88 | 0,06933 | -0,81 | -1,76 | 0,00697 | AK097637        | TUBBP5       |
| 8159786 | -0,91 | -1,88 | 0,07894 | 0,64  | 1,56  | 0,23491 | NR_027156       | ALOXE3       |
| 8012326 | -0,91 | -1,88 | 0,04222 | 0,19  | 1,14  | 0,33283 | NM_001165960    | C1QTNF5      |
| 7952227 | -0,91 | -1,88 | 0,04918 | -1,18 | -2,26 | 0,01933 | NM_015645       | TFAP2A       |
| 8116831 | -0,91 | -1,88 | 0,04546 | 1,87  | 3,65  | 0,01616 | NM_003220       | ---          |
| 8171798 | -0,91 | -1,88 | 0,05105 | -1,34 | -2,54 | 0,00552 | --- MIA2        | ---          |
| 7974080 | -0,91 | -1,88 | 0,02052 | -0,26 | -1,20 | 0,00607 | NM_054024       | DEFB108B     |
| 7942284 | -0,91 | -1,88 | 0,37586 | -2,89 | -7,39 | 0,00202 | NM_001002035    | DEFB108B     |
| 8094136 | -0,91 | -1,88 | 0,37586 | -2,89 | -7,39 | 0,00202 | NM_001002035    | ---          |
| 7904252 | -0,91 | -1,88 | 0,00821 | -1,70 | -3,25 | 0,00007 | ---             | ---          |
| 7931838 | -0,91 | -1,88 | 0,05228 | -1,33 | -2,51 | 0,00605 | ---             | ---          |
| 8139128 | -0,91 | -1,88 | 0,09169 | -0,52 | -1,43 | 0,54948 | --- ASCL3       | ---          |
| 7946436 | -0,91 | -1,88 | 0,00861 | -1,08 | -2,11 | 0,01569 | NM_020646       | TMEM44       |
| 8092888 | -0,91 | -1,88 | 0,02872 | 0,37  | 1,29  | 0,16886 | NM_138399       | SLC10A1      |
| 7979878 | -0,91 | -1,89 | 0,01318 | -1,09 | -2,13 | 0,04314 | NM_003049       | ---          |
| 8055402 | -0,91 | -1,89 | 0,04654 | -1,49 | -2,81 | 0,00484 | --- NPC111      | ---          |
| 8139367 | -0,91 | -1,89 | 0,04633 | -1,63 | -3,09 | 0,00004 | NM_013389       | FAM47E       |
| 8095819 | -0,91 | -1,89 | 0,01321 | -0,60 | -1,51 | 0,15400 | NM_001136570    | ---          |
| 7907568 | -0,91 | -1,89 | 0,03035 | -1,66 | -3,16 | 0,00892 | ---             | ---          |
| 8168565 | -0,92 | -1,89 | 0,02747 | -0,93 | -1,91 | 0,00124 | --- LOC441046   | ---          |
| 8097626 | -0,92 | -1,89 | 0,04498 | 0,51  | 1,42  | 0,37896 | NR_003675       | OR1C1        |
| 7925732 | -0,92 | -1,89 | 0,13575 | -2,32 | -5,00 | 0,02086 | NM_012353       | MS4A3        |
| 7940216 | -0,92 | -1,89 | 0,01313 | -1,12 | -2,17 | 0,00004 | NM_006138       | CHCHD10      |
| 8074939 | -0,92 | -1,89 | 0,00766 | 1,24  | 2,36  | 0,01443 | NM_213720       | TAS2R42      |
| 7961298 | -0,92 | -1,89 | 0,06343 | -0,71 | -1,63 | 0,00380 | NM_181429       | TEX12        |
| 7943859 | -0,92 | -1,89 | 0,02377 | -1,01 | -2,02 | 0,00086 | NM_031275       | SPRR2B       |
| 7920210 | -0,92 | -1,89 | 0,16228 | -1,55 | -2,94 | 0,02145 | NM_001017418    | OR2Z1        |
| 8025450 | -0,92 | -1,89 | 0,04042 | -1,22 | -2,33 | 0,00558 | NM_001004699    | ---          |
| 8173581 | -0,92 | -1,89 | 0,10490 | -0,89 | -1,85 | 0,00081 | ---             | ---          |
| 7942071 | -0,92 | -1,89 | 0,17085 | -1,00 | -2,00 | 0,09245 | --- WDR85       | ---          |
| 8165610 | -0,92 | -1,89 | 0,23290 | 0,75  | 1,68  | 0,02030 | NM_138778       | SCGB1D4      |
| 7948662 | -0,92 | -1,89 | 0,00284 | -1,08 | -2,11 | 0,01525 | NM_206998       | KRTAP4-4     |
| 8015236 | -0,92 | -1,89 | 0,43873 | -2,26 | -4,80 | 0,02274 | NM_032524       | ---          |
| 8169291 | -0,92 | -1,89 | 0,03963 | -0,35 | -1,27 | 0,11955 | --- SPANXB1     | ---          |
| 8170241 | -0,92 | -1,89 | 0,01887 | -1,22 | -2,33 | 0,00010 | NM_032461       | SPANXB1      |
| 8170244 | -0,92 | -1,89 | 0,01887 | -1,22 | -2,33 | 0,00010 | NM_032461       | TNFRSF8      |

|         |       |       |         |       |        |         |                 |              |
|---------|-------|-------|---------|-------|--------|---------|-----------------|--------------|
| 7897860 | -0,92 | -1,89 | 0,07245 | -1,43 | -2,69  | 0,00229 | NM_001243       | DAZZ         |
| 8177426 | -0,92 | -1,89 | 0,02453 | -1,31 | -2,49  | 0,00088 | NM_020363       | ---          |
| 8138086 | -0,92 | -1,89 | 0,07336 | -1,08 | -2,11  | 0,00001 | ---             | UNC5D        |
| 8145799 | -0,92 | -1,89 | 0,10123 | -1,29 | -2,45  | 0,00036 | NM_080872       | ---          |
| 7991171 | -0,92 | -1,89 | 0,05617 | -1,30 | -2,46  | 0,00108 | ---             | C14orf23     |
| 7973748 | -0,92 | -1,89 | 0,03854 | -0,97 | -1,96  | 0,00436 | NR_026731       | PRKCQ        |
| 7931930 | -0,92 | -1,89 | 0,01635 | 1,44  | 2,72   | 0,02992 | NM_006257       | AMTN         |
| 8095508 | -0,92 | -1,89 | 0,00054 | -1,21 | -2,31  | 0,00519 | NM_212557       | ---          |
| 8160661 | -0,92 | -1,89 | 0,11187 | -1,18 | -2,26  | 0,00102 | ---             | C2orf66      |
| 8057954 | -0,92 | -1,89 | 0,03737 | -2,27 | -4,81  | 0,00048 | AY358249        | ---          |
| 8047370 | -0,92 | -1,89 | 0,01013 | -0,85 | -1,80  | 0,03069 | ---             | ---          |
| 7912196 | -0,92 | -1,89 | 0,01496 | -0,96 | -1,95  | 0,00481 | ---             | KLRB1        |
| 7961059 | -0,92 | -1,89 | 0,07569 | -1,20 | -2,30  | 0,00001 | NM_002258       | GPA33        |
| 7922029 | -0,92 | -1,89 | 0,00765 | -0,85 | -1,81  | 0,01820 | NM_005814       | ---          |
| 7907308 | -0,92 | -1,89 | 0,15913 | -1,63 | -3,09  | 0,00250 | ---             | AP1M2        |
| 8034084 | -0,92 | -1,89 | 0,07082 | 1,59  | 3,02   | 0,00357 | NM_005498       | KCNK10       |
| 7980605 | -0,92 | -1,89 | 0,02896 | -0,74 | -1,67  | 0,06017 | NM_021161       | ---          |
| 8129087 | -0,92 | -1,89 | 0,03935 | -1,47 | -2,77  | 0,01376 | ---             | FCRLA        |
| 7906786 | -0,92 | -1,89 | 0,02265 | -1,21 | -2,31  | 0,01198 | NM_032738       | GH1          |
| 8017505 | -0,92 | -1,89 | 0,00999 | -1,21 | -2,31  | 0,00011 | NM_000515       | ---          |
| 7966594 | -0,92 | -1,89 | 0,04840 | -1,11 | -2,15  | 0,01647 | ---             | ---          |
| 8121130 | -0,92 | -1,89 | 0,14274 | -0,17 | -1,12  | 0,12392 | ---             | FLJ37786     |
| 7905018 | -0,92 | -1,89 | 0,16723 | -1,70 | -3,26  | 0,00197 | AK095105        | OR13D1       |
| 8157016 | -0,92 | -1,89 | 0,00598 | -0,71 | -1,63  | 0,14456 | NM_001004484    | ---          |
| 7916582 | -0,92 | -1,89 | 0,11568 | -0,61 | -1,53  | 0,00261 | ---             | ---          |
| 7923317 | -0,92 | -1,89 | 0,07325 | -1,19 | -2,27  | 0,02614 | ---             | MIR196A1     |
| 8016482 | -0,92 | -1,89 | 0,20764 | -0,41 | -1,33  | 0,16470 | NR_029582       | DNAH6        |
| 8043043 | -0,92 | -1,89 | 0,04384 | -1,05 | -2,07  | 0,01558 | NM_001370       | TUBB2B       |
| 8123651 | -0,92 | -1,89 | 0,11888 | -1,16 | -2,24  | 0,00583 | NM_178012       | C1orf125     |
| 7907719 | -0,92 | -1,89 | 0,03940 | -0,62 | -1,53  | 0,02190 | NM_144696       | ADRA1A       |
| 8149885 | -0,92 | -1,89 | 0,16458 | -0,79 | -1,73  | 0,00197 | NM_000680       | LRRC46       |
| 8008040 | -0,92 | -1,89 | 0,03662 | -0,74 | -1,67  | 0,26055 | NM_033413       | RASA4        |
| 8141768 | -0,92 | -1,89 | 0,17692 | -0,79 | -1,73  | 0,09979 | NM_006989       | OR52A4       |
| 7946021 | -0,92 | -1,89 | 0,07052 | -0,88 | -1,85  | 0,04651 | NM_001005222    | ADAMTSL2     |
| 8159086 | -0,92 | -1,89 | 0,06991 | -2,23 | -4,68  | 0,00888 | NM_014694       | PTGER4       |
| 8105067 | -0,92 | -1,89 | 0,00560 | 0,04  | 1,03   | 0,88606 | NM_000958       | TRIM15       |
| 8117849 | -0,92 | -1,89 | 0,03237 | -1,17 | -2,26  | 0,00377 | NM_033229       | TRIM15       |
| 8177760 | -0,92 | -1,89 | 0,03237 | -1,17 | -2,26  | 0,00377 | NM_033229       | TRIM15       |
| 8179070 | -0,92 | -1,89 | 0,03237 | -1,17 | -2,26  | 0,00377 | NM_033229       | ---          |
| 8135943 | -0,92 | -1,89 | 0,30523 | -2,05 | -4,14  | 0,00270 | ---             | ---          |
| 8146157 | -0,92 | -1,89 | 0,16358 | -0,94 | -1,91  | 0,11648 | ---             | PADI1        |
| 7898413 | -0,92 | -1,89 | 0,01250 | -0,74 | -1,67  | 0,11611 | NM_013358       | SPRYD5       |
| 7939954 | -0,92 | -1,89 | 0,18989 | -0,28 | -1,21  | 0,04310 | NM_032681       | ---          |
| 7973303 | -0,92 | -1,89 | 0,24907 | -2,05 | -4,14  | 0,00578 | ---             | ---          |
| 7911211 | -0,92 | -1,89 | 0,32651 | -0,89 | -1,85  | 0,00631 | ---             | PTP4A3       |
| 8148501 | -0,92 | -1,89 | 0,11339 | 1,29  | 2,44   | 0,09836 | NM_032611       | IBSP         |
| 8096281 | -0,92 | -1,89 | 0,12374 | -0,94 | -1,92  | 0,00016 | NM_004967       | LEKR1        |
| 8083576 | -0,92 | -1,89 | 0,01750 | -0,70 | -1,63  | 0,04080 | NM_001004316    | REXO1L1      |
| 8151609 | -0,92 | -1,89 | 0,60224 | -5,31 | -39,80 | 0,00005 | NM_172239       | SCARNA22     |
| 8093576 | -0,92 | -1,89 | 0,08947 | -0,89 | -1,85  | 0,02911 | NR_003004       | NPHS1        |
| 8036176 | -0,92 | -1,89 | 0,02447 | -1,59 | -3,00  | 0,00137 | NM_004646       | KSR2         |
| 7966810 | -0,92 | -1,89 | 0,01999 | -0,37 | -1,29  | 0,06661 | NM_173598       | KRTAP19-1    |
| 8069822 | -0,92 | -1,89 | 0,16075 | -1,84 | -3,59  | 0,00021 | NM_181607       | TICAM1       |
| 8032899 | -0,92 | -1,89 | 0,09489 | 1,22  | 2,32   | 0,00943 | NM_182919       | ---          |
| 7925976 | -0,92 | -1,89 | 0,01948 | -1,94 | -3,84  | 0,01004 | ---             | ---          |
| 8068020 | -0,92 | -1,89 | 0,03892 | -1,23 | -2,34  | 0,00264 | ---             | KAZ          |
| 7912629 | -0,92 | -1,89 | 0,04170 | -0,94 | -1,92  | 0,01306 | NM_201628       | ---          |
| 7978534 | -0,92 | -1,89 | 0,07096 | -0,56 | -1,48  | 0,03663 | ---             | FER1L5       |
| 8043632 | -0,92 | -1,89 | 0,16880 | -1,58 | -2,99  | 0,02725 | NM_001113382    | LOC100129150 |
| 8144526 | -0,92 | -1,89 | 0,26483 | -2,63 | -6,20  | 0,01316 | ENST00000416972 | ---          |
| 7906948 | -0,92 | -1,89 | 0,08801 | -0,93 | -1,91  | 0,26566 | ---             | TBC1D28      |
| 8013294 | -0,92 | -1,89 | 0,14800 | -0,74 | -1,67  | 0,03103 | NM_001039397    | USP17L2      |
| 8144397 | -0,92 | -1,89 | 0,57483 | -2,28 | -4,84  | 0,00150 | NM_201402       | USP17L2      |
| 8149241 | -0,92 | -1,89 | 0,57483 | -2,28 | -4,84  | 0,00150 | NM_201402       | QRFPR        |
| 8102608 | -0,92 | -1,89 | 0,04882 | -1,22 | -2,32  | 0,04893 | NM_198179       | ZNF574       |
| 8029182 | -0,92 | -1,89 | 0,00799 | 0,83  | 1,77   | 0,01715 | NM_022752       | TBX22        |
| 8168534 | -0,92 | -1,89 | 0,03905 | -1,30 | -2,46  | 0,00726 | NM_016954       | CSAG2        |
| 8175710 | -0,92 | -1,89 | 0,01873 | -0,82 | -1,76  | 0,00336 | NM_001080848    | ---          |
| 7929589 | -0,92 | -1,89 | 0,02134 | -1,40 | -2,64  | 0,02653 | ---             | OR8K5        |
| 7948121 | -0,92 | -1,89 | 0,25892 | -1,08 | -2,12  | 0,03711 | NM_001004058    | HPD          |
| 7967212 | -0,92 | -1,89 | 0,09728 | -1,22 | -2,33  | 0,01243 | NM_002150       | ---          |
| 8168026 | -0,92 | -1,90 | 0,24011 | -1,45 | -2,72  | 0,00294 | ---             | GPR123       |
| 7931500 | -0,92 | -1,90 | 0,05737 | -0,91 | -1,88  | 0,01670 | NM_001083909    | LOC100133469 |

|         |       |       |         |       |        |         |                 |              |
|---------|-------|-------|---------|-------|--------|---------|-----------------|--------------|
| 7977447 | -0,92 | -1,90 | 0,09965 | -1,03 | -2,04  | 0,01097 | NR_027457       | SNORD56B     |
| 7975453 | -0,92 | -1,90 | 0,04460 | -0,93 | -1,91  | 0,01370 | NR_001276       | ---          |
| 8161431 | -0,92 | -1,90 | 0,11066 | -0,97 | -1,96  | 0,07948 | ---             | ---          |
| 8061414 | -0,92 | -1,90 | 0,22605 | -0,44 | -1,36  | 0,01623 | ---             | ZFYVE28      |
| 8099008 | -0,92 | -1,90 | 0,01253 | -0,60 | -1,52  | 0,20325 | NM_020972       | AKR1D1       |
| 8136459 | -0,92 | -1,90 | 0,00378 | -1,17 | -2,25  | 0,00031 | NM_005989       | ---          |
| 7938070 | -0,92 | -1,90 | 0,00381 | -1,29 | -2,45  | 0,08862 | ---             | ZNF283       |
| 8029321 | -0,92 | -1,90 | 0,14005 | -0,15 | -1,11  | 0,58517 | NM_181845       | SNORD115-40  |
| 7982086 | -0,92 | -1,90 | 0,11945 | -1,54 | -2,91  | 0,00168 | NR_003355       | ---          |
| 7961624 | -0,92 | -1,90 | 0,01279 | -1,29 | -2,44  | 0,00037 | ---             | LYPD4        |
| 8037061 | -0,92 | -1,90 | 0,09680 | -1,53 | -2,89  | 0,00933 | NM_173506       | YIPF7        |
| 8100076 | -0,92 | -1,90 | 0,24461 | -1,18 | -2,27  | 0,00084 | NM_182592       | ---          |
| 8169348 | -0,92 | -1,90 | 0,01146 | -1,38 | -2,60  | 0,00535 | ---             | NOTUM        |
| 8019334 | -0,92 | -1,90 | 0,04949 | 0,31  | 1,24   | 0,34740 | NM_178493       | FAM75A7      |
| 8155340 | -0,92 | -1,90 | 0,12454 | -1,65 | -3,15  | 0,00312 | NM_015667       | ---          |
| 8140532 | -0,92 | -1,90 | 0,03639 | -1,45 | -2,74  | 0,07264 | ---             | MYL4         |
| 8007921 | -0,92 | -1,90 | 0,00820 | -0,95 | -1,93  | 0,17778 | NM_001002841    | ---          |
| 7986836 | -0,92 | -1,90 | 0,13267 | -0,55 | -1,47  | 0,16078 | ---             | RNF31        |
| 7973613 | -0,92 | -1,90 | 0,02310 | -0,32 | -1,25  | 0,39065 | NM_017999       | C1QTNF1      |
| 8010287 | -0,92 | -1,90 | 0,10191 | -0,99 | -1,98  | 0,08012 | NM_030968       | ACTN3        |
| 7941662 | -0,92 | -1,90 | 0,07825 | -0,88 | -1,85  | 0,04534 | NM_001104       | PPY          |
| 8015884 | -0,92 | -1,90 | 0,04143 | -1,61 | -3,06  | 0,00187 | NM_002722       | C17orf59     |
| 8004802 | -0,92 | -1,90 | 0,09583 | -1,43 | -2,69  | 0,01166 | NM_017622       | AASDHPTT     |
| 7951435 | -0,92 | -1,90 | 0,23065 | -0,82 | -1,77  | 0,01323 | NM_015423       | ---          |
| 7984215 | -0,92 | -1,90 | 0,00868 | -0,95 | -1,93  | 0,03399 | ---             | psiTPTE22    |
| 8071061 | -0,92 | -1,90 | 0,35197 | -3,60 | -12,10 | 0,00086 | AK097082        | ZSCAN2       |
| 7985577 | -0,92 | -1,90 | 0,08309 | -0,15 | -1,11  | 0,45106 | NM_181877       | RAPGEF3      |
| 7962625 | -0,92 | -1,90 | 0,12889 | -1,19 | -2,28  | 0,06901 | NM_001098531    | SERPINB11    |
| 8021614 | -0,92 | -1,90 | 0,04783 | -0,41 | -1,33  | 0,00820 | NM_080475       | ---          |
| 7921220 | -0,92 | -1,90 | 0,04584 | -0,94 | -1,91  | 0,01666 | ---             | ---          |
| 8016412 | -0,92 | -1,90 | 0,02401 | -1,77 | -3,42  | 0,00400 | ---             | FLJ33534     |
| 8050293 | -0,92 | -1,90 | 0,03332 | -1,70 | -3,24  | 0,00009 | AK090853        | ---          |
| 8112888 | -0,92 | -1,90 | 0,10337 | -1,12 | -2,17  | 0,10836 | ---             | ---          |
| 8007139 | -0,93 | -1,90 | 0,08980 | -0,74 | -1,67  | 0,01092 | ---             | SNORA64      |
| 7998666 | -0,93 | -1,90 | 0,08582 | -0,36 | -1,28  | 0,43680 | NR_002326       | ---          |
| 8078310 | -0,93 | -1,90 | 0,00719 | -0,77 | -1,70  | 0,03011 | ---             | DUS3L        |
| 8033025 | -0,93 | -1,90 | 0,00334 | 0,92  | 1,89   | 0,14714 | NM_020175       | TSPO2        |
| 8119396 | -0,93 | -1,90 | 0,03677 | -1,56 | -2,94  | 0,00799 | NM_001010873    | CCR8         |
| 8078888 | -0,93 | -1,90 | 0,07147 | -0,98 | -1,98  | 0,02771 | NM_005201       | ---          |
| 8097505 | -0,93 | -1,90 | 0,06649 | -1,72 | -3,29  | 0,00235 | ---             | KMO          |
| 7910950 | -0,93 | -1,90 | 0,00066 | -0,82 | -1,77  | 0,00641 | NM_003679       | ---          |
| 7985037 | -0,93 | -1,90 | 0,08109 | -0,84 | -1,79  | 0,00110 | ---             | OR10G7       |
| 7952388 | -0,93 | -1,90 | 0,18144 | -1,43 | -2,70  | 0,00366 | NM_001004463    | MCF2L2       |
| 8092358 | -0,93 | -1,90 | 0,00905 | 0,20  | 1,15   | 0,42306 | NM_015078       | ---          |
| 8073941 | -0,93 | -1,90 | 0,14350 | -1,65 | -3,15  | 0,00102 | ---             | COL16A1      |
| 7914361 | -0,93 | -1,90 | 0,14101 | -2,16 | -4,47  | 0,00043 | NM_001856       | CEACAM19     |
| 8029446 | -0,93 | -1,90 | 0,21733 | -1,22 | -2,33  | 0,00263 | NM_001127893    | FRAT1        |
| 7929616 | -0,93 | -1,90 | 0,02280 | -0,10 | -1,07  | 0,50235 | NM_005479       | FADS6        |
| 8018251 | -0,93 | -1,90 | 0,13620 | -2,23 | -4,68  | 0,00003 | NM_178128       | LOC100129318 |
| 7992996 | -0,93 | -1,90 | 0,01548 | -0,93 | -1,91  | 0,14390 | AY358225        | TTTTY9A      |
| 8176692 | -0,93 | -1,90 | 0,03000 | -1,87 | -3,66  | 0,00054 | NR_001530       | TTTTY9A      |
| 8177195 | -0,93 | -1,90 | 0,03000 | -1,87 | -3,66  | 0,00054 | NR_001530       | OR6K6        |
| 7906374 | -0,93 | -1,90 | 0,02029 | -1,60 | -3,04  | 0,01057 | NM_001005184    | ---          |
| 8149833 | -0,93 | -1,90 | 0,08016 | -2,13 | -4,38  | 0,00132 | ---             | ---          |
| 8047536 | -0,93 | -1,90 | 0,04488 | -0,65 | -1,57  | 0,06443 | ---             | TACR1        |
| 8053266 | -0,93 | -1,90 | 0,03054 | -1,59 | -3,00  | 0,00517 | NM_001058       | ---          |
| 7899849 | -0,93 | -1,90 | 0,08068 | -0,83 | -1,78  | 0,02582 | ---             | C4orf33      |
| 8097435 | -0,93 | -1,90 | 0,13425 | 1,17  | 2,25   | 0,02408 | NM_173487       | WDR24        |
| 7998280 | -0,93 | -1,90 | 0,05232 | 0,10  | 1,07   | 0,77130 | NM_032259       | MYBPC3       |
| 7947828 | -0,93 | -1,90 | 0,07716 | -1,61 | -3,05  | 0,00078 | NM_000256       | NBPF4        |
| 7903478 | -0,93 | -1,90 | 0,04082 | -1,42 | -2,68  | 0,00320 | NM_001143989    | CD52         |
| 7899160 | -0,93 | -1,90 | 0,13768 | -0,35 | -1,27  | 0,30376 | NM_001803       | ---          |
| 8073631 | -0,93 | -1,90 | 0,00693 | -1,00 | -2,01  | 0,00560 | ---             | KLHL31       |
| 8120277 | -0,93 | -1,90 | 0,06419 | -0,81 | -1,76  | 0,00975 | ENST00000407079 | LOC347376    |
| 8167640 | -0,93 | -1,90 | 0,05395 | -1,12 | -2,17  | 0,00624 | NR_003933       | ---          |
| 8151888 | -0,93 | -1,90 | 0,00669 | -1,38 | -2,61  | 0,04388 | ---             | LOC145757    |
| 7986444 | -0,93 | -1,90 | 0,01455 | 1,18  | 2,26   | 0,01591 | AK056534        | SLC6A16      |
| 8038326 | -0,93 | -1,90 | 0,02294 | 1,10  | 2,14   | 0,00068 | NM_014037       | CATSPER4     |
| 7899124 | -0,93 | -1,90 | 0,00906 | -0,84 | -1,79  | 0,01620 | NM_198137       | C12orf56     |
| 7964687 | -0,93 | -1,90 | 0,00699 | -0,43 | -1,35  | 0,29402 | NM_001170633    | C21orf15     |
| 8069505 | -0,93 | -1,90 | 0,35398 | -1,02 | -2,03  | 0,00795 | BX648100        | ---          |
| 8137524 | -0,93 | -1,90 | 0,00114 | -1,25 | -2,37  | 0,02772 | ---             | C11orf64     |
| 7940315 | -0,93 | -1,90 | 0,00725 | -1,41 | -2,66  | 0,00168 | NR_026946       | ---          |

|         |       |       |         |       |       |         |              |            |           |
|---------|-------|-------|---------|-------|-------|---------|--------------|------------|-----------|
| 8119159 | -0,93 | -1,90 | 0,11972 | -1,08 | -2,11 | 0,08005 | ---          | ---        |           |
| 8019561 | -0,93 | -1,90 | 0,10477 | -0,84 | -1,80 | 0,00463 | ---          | MIR30B     |           |
| 8153065 | -0,93 | -1,90 | 0,03077 | -0,88 | -1,85 | 0,05636 | NR_029666    |            | MAST1     |
| 8026063 | -0,93 | -1,90 | 0,02413 | -0,14 | -1,10 | 0,63044 | NM_014975    |            | PLXNA4    |
| 8142997 | -0,93 | -1,90 | 0,04540 | -1,05 | -2,07 | 0,02139 | NM_020911    |            | PRAMEF11  |
| 7912547 | -0,93 | -1,90 | 0,26338 | -1,05 | -2,06 | 0,00635 | NM_001146344 |            | FAM150B   |
| 8049990 | -0,93 | -1,90 | 0,15456 | -2,47 | -5,54 | 0,00151 | NM_001002919 |            | ---       |
| 8038137 | -0,93 | -1,90 | 0,10251 | -1,24 | -2,35 | 0,06130 | ---          | DNAH12     |           |
| 8088299 | -0,93 | -1,90 | 0,00102 | -0,82 | -1,77 | 0,01912 | NM_178504    |            | LOC400696 |
| 8028744 | -0,93 | -1,90 | 0,04440 | -0,62 | -1,53 | 0,10929 | NM_207646    |            | KCNA10    |
| 7918444 | -0,93 | -1,90 | 0,18567 | -1,95 | -3,86 | 0,00567 | NM_005549    |            | C3orf36   |
| 8090817 | -0,93 | -1,90 | 0,15471 | -1,51 | -2,85 | 0,00370 | NM_025041    |            | EPHX4     |
| 7902957 | -0,93 | -1,91 | 0,11858 | 1,34  | 2,52  | 0,00538 | NM_173567    |            | CNTNAP5   |
| 8044976 | -0,93 | -1,91 | 0,08800 | -1,24 | -2,35 | 0,00227 | NM_130773    |            | KRT38     |
| 8015287 | -0,93 | -1,91 | 0,00702 | -0,57 | -1,48 | 0,20125 | NM_006771    |            | KIAA0125  |
| 7977445 | -0,93 | -1,91 | 0,17774 | -1,43 | -2,69 | 0,06055 | NR_026800    |            | ---       |
| 8120247 | -0,93 | -1,91 | 0,03628 | -0,92 | -1,90 | 0,00027 | ---          | ---        |           |
| 7975386 | -0,93 | -1,91 | 0,02603 | -1,57 | -2,97 | 0,00258 | ---          | PRAMEF15   |           |
| 7912582 | -0,93 | -1,91 | 0,30856 | -1,13 | -2,19 | 0,09278 | NM_001098376 |            | ---       |
| 8091998 | -0,93 | -1,91 | 0,11239 | -1,86 | -3,62 | 0,03842 | ---          | ---        |           |
| 8016431 | -0,93 | -1,91 | 0,09031 | -1,28 | -2,43 | 0,01815 | ---          | B3GNT9     |           |
| 8001932 | -0,93 | -1,91 | 0,06152 | -0,56 | -1,47 | 0,36943 | NM_033309    |            | ---       |
| 8102592 | -0,93 | -1,91 | 0,02418 | -1,02 | -2,03 | 0,03026 | ---          | ---        |           |
| 7955248 | -0,93 | -1,91 | 0,12087 | -0,93 | -1,90 | 0,00987 | ---          | ---        |           |
| 7924731 | -0,93 | -1,91 | 0,03182 | -0,99 | -1,98 | 0,00148 | ---          | IL25       |           |
| 7973393 | -0,93 | -1,91 | 0,05374 | -1,07 | -2,10 | 0,00124 | NM_022789    |            | ATP2A1    |
| 7994463 | -0,93 | -1,91 | 0,01694 | -0,80 | -1,74 | 0,00906 | NM_004320    |            | MS4A5     |
| 7940279 | -0,93 | -1,91 | 0,04412 | -0,67 | -1,59 | 0,00053 | NM_023945    |            | RECQL5    |
| 8018400 | -0,93 | -1,91 | 0,04096 | -0,39 | -1,31 | 0,15688 | NM_004259    |            | GPR68     |
| 7980765 | -0,93 | -1,91 | 0,02306 | -1,80 | -3,48 | 0,00116 | NM_003485    |            | ---       |
| 7900407 | -0,93 | -1,91 | 0,05237 | -1,15 | -2,21 | 0,00137 | ---          | PSORS1C1   |           |
| 8177938 | -0,93 | -1,91 | 0,07501 | 0,99  | 1,99  | 0,10230 | NM_014068    |            | ID2B      |
| 8088480 | -0,93 | -1,91 | 0,00437 | -0,75 | -1,68 | 0,01127 | NR_026582    |            | ---       |
| 7911331 | -0,93 | -1,91 | 0,21407 | -1,82 | -3,54 | 0,04991 | ---          | ---        |           |
| 7924463 | -0,93 | -1,91 | 0,21407 | -1,82 | -3,54 | 0,04991 | ---          | ---        |           |
| 7927089 | -0,93 | -1,91 | 0,21407 | -1,82 | -3,54 | 0,04991 | ---          | ---        |           |
| 7945347 | -0,93 | -1,91 | 0,21407 | -1,82 | -3,54 | 0,04991 | ---          | ---        |           |
| 7998115 | -0,93 | -1,91 | 0,21407 | -1,82 | -3,54 | 0,04991 | ---          | ---        |           |
| 8031997 | -0,93 | -1,91 | 0,21407 | -1,82 | -3,54 | 0,04991 | ---          | ---        |           |
| 8102530 | -0,93 | -1,91 | 0,21407 | -1,82 | -3,54 | 0,04991 | ---          | ---        |           |
| 8137668 | -0,93 | -1,91 | 0,21407 | -1,82 | -3,54 | 0,04991 | ---          | ---        |           |
| 7899071 | -0,93 | -1,91 | 0,03953 | -0,98 | -1,98 | 0,01520 | ---          | ---        |           |
| 8165993 | -0,93 | -1,91 | 0,01247 | -0,93 | -1,91 | 0,03993 | ---          | ---        |           |
| 7919578 | -0,93 | -1,91 | 0,29077 | -3,11 | -8,63 | 0,00122 | ---          | POTEB      |           |
| 7986605 | -0,93 | -1,91 | 0,11711 | -1,63 | -3,09 | 0,03544 | NM_207355    |            | ---       |
| 8043468 | -0,93 | -1,91 | 0,09237 | -1,38 | -2,61 | 0,00486 | ---          | TRIM61     |           |
| 8103520 | -0,93 | -1,91 | 0,27442 | -1,36 | -2,57 | 0,02765 | NM_001012414 |            | CXorf18   |
| 8175537 | -0,93 | -1,91 | 0,40056 | -1,17 | -2,24 | 0,18120 | AK093505     |            | ---       |
| 8107125 | -0,93 | -1,91 | 0,07383 | -0,75 | -1,68 | 0,12849 | ---          | PLEK       |           |
| 8042391 | -0,93 | -1,91 | 0,03423 | -0,80 | -1,74 | 0,01586 | NM_002664    |            | FGFRL1    |
| 8093440 | -0,93 | -1,91 | 0,21620 | -0,99 | -1,99 | 0,24752 | NM_001004356 |            | PAPLN     |
| 7975562 | -0,93 | -1,91 | 0,14296 | -0,50 | -1,41 | 0,44670 | NM_173462    |            | ---       |
| 7999884 | -0,93 | -1,91 | 0,08225 | -0,95 | -1,93 | 0,02247 | ---          | C21orf90   |           |
| 8069135 | -0,93 | -1,91 | 0,07550 | -1,38 | -2,59 | 0,07660 | NR_026547    |            | ---       |
| 8099130 | -0,93 | -1,91 | 0,17744 | -1,33 | -2,52 | 0,00002 | ---          | TRAT1      |           |
| 8081537 | -0,93 | -1,91 | 0,00429 | -0,81 | -1,75 | 0,03456 | NM_016388    |            | RAC3      |
| 8010737 | -0,93 | -1,91 | 0,06070 | 0,48  | 1,40  | 0,25399 | NM_005052    |            | ---       |
| 8173823 | -0,93 | -1,91 | 0,04055 | -0,94 | -1,92 | 0,01501 | ---          | TMOD4      |           |
| 7919929 | -0,93 | -1,91 | 0,01739 | -1,22 | -2,34 | 0,06394 | NM_013353    |            | BPIL2     |
| 8075600 | -0,93 | -1,91 | 0,00974 | -1,11 | -2,16 | 0,00201 | NM_174932    |            | ---       |
| 8151279 | -0,93 | -1,91 | 0,00434 | -1,50 | -2,83 | 0,00009 | ---          | ---        |           |
| 8088634 | -0,93 | -1,91 | 0,04401 | -0,98 | -1,97 | 0,00580 | ---          | NCRNA00207 |           |
| 8073698 | -0,93 | -1,91 | 0,03947 | -1,21 | -2,31 | 0,00536 | NR_028409    |            | ---       |
| 8175589 | -0,93 | -1,91 | 0,08578 | -0,84 | -1,79 | 0,08317 | ---          | ---        |           |
| 8040465 | -0,93 | -1,91 | 0,09232 | -1,41 | -2,66 | 0,03538 | ---          | ---        |           |
| 8138043 | -0,93 | -1,91 | 0,04390 | -0,77 | -1,71 | 0,07873 | ---          | ZNF503     |           |
| 7928529 | -0,93 | -1,91 | 0,13104 | -1,72 | -3,29 | 0,05493 | NM_032772    |            | PIK3CG    |
| 8135363 | -0,93 | -1,91 | 0,01522 | -1,84 | -3,59 | 0,00373 | NM_002649    |            | MAGEA5    |
| 8175685 | -0,93 | -1,91 | 0,05991 | -1,37 | -2,59 | 0,00634 | NM_021049    |            | ---       |
| 8022281 | -0,93 | -1,91 | 0,00251 | -0,98 | -1,98 | 0,09937 | ---          | ITPA       |           |
| 8060611 | -0,93 | -1,91 | 0,04027 | 0,41  | 1,33  | 0,20107 | NM_033453    |            | C15orf51  |
| 7986426 | -0,93 | -1,91 | 0,12848 | -1,90 | -3,73 | 0,02765 | NR_003260    |            | FAM19A3   |
| 7904073 | -0,93 | -1,91 | 0,00909 | -1,03 | -2,04 | 0,01754 | NM_001004440 |            | TMEM145   |



|         |       |       |         |       |        |         |                 |              |
|---------|-------|-------|---------|-------|--------|---------|-----------------|--------------|
| 8029219 | -0,93 | -1,91 | 0,02217 | 0,25  | 1,19   | 0,50856 | NM_173633       | RAP1GAP      |
| 7913385 | -0,93 | -1,91 | 0,06944 | -0,32 | -1,24  | 0,49436 | NM_001145657    | OR5D3P       |
| 7939936 | -0,94 | -1,91 | 0,08101 | -1,72 | -3,28  | 0,00507 | ENST00000333984 | ---          |
| 7975813 | -0,94 | -1,91 | 0,03059 | -1,43 | -2,70  | 0,01437 | ---             | GLT1D1       |
| 7959834 | -0,94 | -1,91 | 0,09543 | -0,90 | -1,86  | 0,03809 | NM_144669       | ---          |
| 8151234 | -0,94 | -1,91 | 0,07712 | -1,63 | -3,09  | 0,00083 | ---             | GC           |
| 8100853 | -0,94 | -1,91 | 0,09327 | -0,88 | -1,84  | 0,01558 | NM_000583       | TNNT2        |
| 7923332 | -0,94 | -1,91 | 0,11234 | -0,08 | -1,06  | 0,76540 | NM_000364       | ---          |
| 8095251 | -0,94 | -1,91 | 0,00709 | -0,50 | -1,42  | 0,24369 | ---             | GOLGA9P      |
| 7982350 | -0,94 | -1,91 | 0,34561 | -0,89 | -1,86  | 0,04075 | NR_024074       | GOLGA9P      |
| 7987139 | -0,94 | -1,91 | 0,34561 | -0,89 | -1,86  | 0,04075 | NR_024074       | SARDH        |
| 8164940 | -0,94 | -1,91 | 0,03478 | -1,62 | -3,08  | 0,00007 | NM_001134707    | DHX34        |
| 8029918 | -0,94 | -1,91 | 0,04240 | 0,65  | 1,57   | 0,30105 | NM_014681       | FLI1         |
| 7945132 | -0,94 | -1,91 | 0,00478 | -1,26 | -2,39  | 0,00216 | NM_002017       | MS4A6E       |
| 7940253 | -0,94 | -1,91 | 0,09282 | -0,90 | -1,86  | 0,09684 | NM_139249       | ZNF157       |
| 8167152 | -0,94 | -1,91 | 0,08261 | -1,76 | -3,38  | 0,00537 | NM_003446       | PGP          |
| 7998759 | -0,94 | -1,91 | 0,03698 | 0,16  | 1,12   | 0,54152 | NM_001042371    | SIRPD        |
| 8064464 | -0,94 | -1,91 | 0,02218 | -1,26 | -2,40  | 0,00456 | NM_178460       | LRRC16B      |
| 7973468 | -0,94 | -1,91 | 0,02186 | -0,91 | -1,88  | 0,11209 | NM_138360       | MAMDC2       |
| 8155754 | -0,94 | -1,91 | 0,01502 | -0,85 | -1,80  | 0,04405 | NM_153267       | OK/SW-CL.58  |
| 7970828 | -0,94 | -1,91 | 0,15217 | -1,70 | -3,24  | 0,09600 | AB064667        | ---          |
| 7945226 | -0,94 | -1,91 | 0,02186 | -1,36 | -2,57  | 0,00430 | ---             | ---          |
| 8166498 | -0,94 | -1,91 | 0,04365 | -1,08 | -2,12  | 0,00441 | ---             | ZNF485       |
| 7927173 | -0,94 | -1,91 | 0,07205 | 0,37  | 1,29   | 0,66759 | NM_145312       | FAM164C      |
| 7975772 | -0,94 | -1,91 | 0,03214 | -0,28 | -1,22  | 0,08009 | NM_024643       | GRM6         |
| 8116253 | -0,94 | -1,91 | 0,09065 | -1,08 | -2,11  | 0,02090 | NM_000843       | RHOV         |
| 7987574 | -0,94 | -1,91 | 0,12004 | 0,06  | 1,04   | 0,89554 | NM_133639       | CR1L         |
| 7909390 | -0,94 | -1,91 | 0,33403 | -0,71 | -1,64  | 0,00153 | NM_175710       | SNORA5A      |
| 8139482 | -0,94 | -1,91 | 0,05508 | -0,30 | -1,23  | 0,28037 | NR_002919       | C1orf172     |
| 7914003 | -0,94 | -1,92 | 0,05524 | 1,81  | 3,51   | 0,00023 | NM_152365       | RDH13        |
| 8039306 | -0,94 | -1,92 | 0,00151 | -0,07 | -1,05  | 0,84721 | NM_001145971    | ---          |
| 8091456 | -0,94 | -1,92 | 0,07195 | -1,76 | -3,39  | 0,04127 | ---             | ---          |
| 8106763 | -0,94 | -1,92 | 0,05938 | -1,16 | -2,24  | 0,00130 | ---             | ACRBP        |
| 7960642 | -0,94 | -1,92 | 0,04458 | -0,95 | -1,93  | 0,02922 | NM_032489       | CDKN1C       |
| 7945767 | -0,94 | -1,92 | 0,14175 | -1,11 | -2,15  | 0,13901 | NM_000076       | RGL3         |
| 8034227 | -0,94 | -1,92 | 0,03249 | 1,03  | 2,05   | 0,05420 | NM_001161616    | GSTA5        |
| 8127079 | -0,94 | -1,92 | 0,15062 | -1,09 | -2,13  | 0,07434 | NM_153699       | SLC30A8      |
| 8148003 | -0,94 | -1,92 | 0,00410 | -0,88 | -1,84  | 0,01656 | NM_001172813    | MIR103-2     |
| 8060734 | -0,94 | -1,92 | 0,04491 | -0,58 | -1,49  | 0,04797 | NR_029519       | ID4          |
| 8117120 | -0,94 | -1,92 | 0,00315 | -2,09 | -4,25  | 0,00101 | NM_001546       | CCRL2        |
| 8079407 | -0,94 | -1,92 | 0,10992 | -1,10 | -2,14  | 0,04702 | NM_003965       | C21orf2      |
| 8070744 | -0,94 | -1,92 | 0,03429 | -1,28 | -2,43  | 0,04308 | NM_004928       | ---          |
| 8118979 | -0,94 | -1,92 | 0,02302 | -0,47 | -1,38  | 0,02584 | ---             | LOC51152     |
| 7904478 | -0,94 | -1,92 | 0,64523 | -4,62 | -24,55 | 0,00040 | AF172850        | TMEM202      |
| 7984635 | -0,94 | -1,92 | 0,01617 | -1,01 | -2,02  | 0,00541 | NM_001080462    | ---          |
| 7958017 | -0,94 | -1,92 | 0,05206 | -0,84 | -1,79  | 0,00012 | ---             | ---          |
| 7913972 | -0,94 | -1,92 | 0,15492 | -0,98 | -1,97  | 0,00517 | ---             | PKD1         |
| 7998700 | -0,94 | -1,92 | 0,00185 | 0,08  | 1,06   | 0,89325 | NM_001009944    | LOC100129831 |
| 8024444 | -0,94 | -1,92 | 0,01329 | -0,98 | -1,98  | 0,05970 | AY358234        | LRRC61       |
| 8137215 | -0,94 | -1,92 | 0,00025 | 0,57  | 1,48   | 0,24795 | NM_001142928    | ---          |
| 7961593 | -0,94 | -1,92 | 0,01360 | -0,87 | -1,82  | 0,06356 | ---             | ---          |
| 8173977 | -0,94 | -1,92 | 0,05179 | -1,06 | -2,08  | 0,00891 | ---             | ---          |
| 7944767 | -0,94 | -1,92 | 0,03784 | -1,21 | -2,31  | 0,00784 | ---             | HIST1H2AM    |
| 8124540 | -0,94 | -1,92 | 0,00383 | -0,17 | -1,12  | 0,65192 | NM_003514       | ---          |
| 8065200 | -0,94 | -1,92 | 0,04878 | -0,54 | -1,45  | 0,00165 | ---             | CCT8L2       |
| 8074196 | -0,94 | -1,92 | 0,17696 | -1,00 | -2,01  | 0,05651 | NM_014406       | PTCHD1       |
| 8166447 | -0,94 | -1,92 | 0,17482 | -1,17 | -2,25  | 0,02387 | NM_173495       | PLCZ1        |
| 7961604 | -0,94 | -1,92 | 0,04523 | -0,52 | -1,43  | 0,00292 | NM_033123       | ACE          |
| 8009096 | -0,94 | -1,92 | 0,00255 | -0,86 | -1,82  | 0,07405 | NM_000789       | RIT2         |
| 8022976 | -0,94 | -1,92 | 0,00353 | -0,99 | -1,98  | 0,07867 | NM_002930       | LOC100129503 |
| 8010560 | -0,94 | -1,92 | 0,02519 | -0,07 | -1,05  | 0,85467 | AF258550        | OR51B4       |
| 7946067 | -0,94 | -1,92 | 0,06854 | -1,47 | -2,77  | 0,00222 | NM_033179       | VN1R2        |
| 8030972 | -0,94 | -1,92 | 0,02322 | -1,23 | -2,34  | 0,00323 | NM_173856       | NARFL        |
| 7998336 | -0,94 | -1,92 | 0,00562 | -0,59 | -1,51  | 0,35585 | NM_022493       | ---          |
| 8121747 | -0,94 | -1,92 | 0,01177 | -1,14 | -2,20  | 0,04132 | ---             | ---          |
| 8038960 | -0,94 | -1,92 | 0,09759 | -1,14 | -2,20  | 0,01568 | ---             | LOC100128292 |
| 7928545 | -0,94 | -1,92 | 0,05569 | -0,45 | -1,37  | 0,30530 | NR_024585       | SPINK6       |
| 8109044 | -0,94 | -1,92 | 0,04150 | -0,94 | -1,92  | 0,00542 | NM_205841       | HS3ST3A1     |
| 8012883 | -0,94 | -1,92 | 0,08555 | -1,75 | -3,37  | 0,00245 | NM_006042       | CASZ1        |
| 7912316 | -0,94 | -1,92 | 0,06986 | 0,21  | 1,15   | 0,31420 | NM_001079843    | LIN28A       |
| 7899167 | -0,94 | -1,92 | 0,06051 | -1,13 | -2,20  | 0,04741 | NM_024674       | OR2A7        |
| 8143633 | -0,94 | -1,92 | 0,13214 | 1,48  | 2,79   | 0,01045 | NM_001005328    | ZNF648       |
| 7922686 | -0,94 | -1,92 | 0,04431 | -1,52 | -2,87  | 0,00002 | NM_001009992    | ---          |

|         |       |       |         |       |       |         |                 |              |  |
|---------|-------|-------|---------|-------|-------|---------|-----------------|--------------|--|
| 8129311 | -0,94 | -1,92 | 0,02201 | -1,15 | -2,22 | 0,00630 | ---             | FAM83C       |  |
| 8065880 | -0,94 | -1,92 | 0,06299 | -1,20 | -2,31 | 0,00061 | NM_178468       | XAGE3        |  |
| 8172806 | -0,94 | -1,92 | 0,08414 | -0,73 | -1,65 | 0,01666 | NM_133179       | NTN1         |  |
| 8004880 | -0,94 | -1,92 | 0,09663 | -0,25 | -1,19 | 0,56800 | NM_004822       | CRP          |  |
| 7921449 | -0,94 | -1,92 | 0,00659 | -1,51 | -2,85 | 0,00014 | NM_000567       | ---          |  |
| 8039672 | -0,94 | -1,92 | 0,10391 | -0,44 | -1,35 | 0,00346 | ---             | ---          |  |
| 7954775 | -0,94 | -1,92 | 0,04546 | -1,26 | -2,40 | 0,00004 | ---             | LOC729444    |  |
| 8074597 | -0,94 | -1,92 | 0,32340 | -2,38 | -5,20 | 0,00158 | AK302783        | GIMAP2       |  |
| 8137250 | -0,94 | -1,92 | 0,03452 | -1,12 | -2,17 | 0,01283 | NM_015660       | TRPV1        |  |
| 8011375 | -0,94 | -1,92 | 0,02488 | -0,39 | -1,31 | 0,44612 | NM_080704       | DKFZp434F142 |  |
| 8133112 | -0,94 | -1,92 | 0,24657 | -0,44 | -1,35 | 0,15072 | AL136837        | EPHB1        |  |
| 8082846 | -0,94 | -1,92 | 0,05044 | -0,73 | -1,65 | 0,00379 | NM_004441       | LOC439914    |  |
| 7941059 | -0,94 | -1,92 | 0,07629 | -1,37 | -2,59 | 0,00165 | ENST00000316124 | KIR3DL2      |  |
| 8031328 | -0,94 | -1,92 | 0,15396 | -1,17 | -2,25 | 0,00174 | NM_006737       | KCNH8        |  |
| 8078196 | -0,94 | -1,92 | 0,05086 | -1,25 | -2,37 | 0,00113 | NM_144633       | FAM71D       |  |
| 7975191 | -0,94 | -1,92 | 0,19287 | -0,54 | -1,45 | 0,18468 | NM_173526       | HK3          |  |
| 8115957 | -0,94 | -1,92 | 0,00260 | -0,54 | -1,46 | 0,08143 | NM_002115       | SLC17A3      |  |
| 8124351 | -0,94 | -1,92 | 0,00833 | -0,46 | -1,38 | 0,01761 | NM_001098486    | LPL          |  |
| 8144917 | -0,94 | -1,92 | 0,06387 | -1,39 | -2,62 | 0,00486 | NM_000237       | ---          |  |
| 8023310 | -0,94 | -1,92 | 0,00105 | -1,52 | -2,86 | 0,00542 | ---             | MIR199A2     |  |
| 7922328 | -0,94 | -1,92 | 0,03483 | -1,17 | -2,25 | 0,06661 | NR_029618       | HSF4         |  |
| 7996430 | -0,94 | -1,92 | 0,03591 | 0,13  | 1,09  | 0,73439 | NM_001040667    | ---          |  |
| 8010963 | -0,94 | -1,92 | 0,00102 | -1,03 | -2,04 | 0,02024 | ---             | ---          |  |
| 7945950 | -0,94 | -1,92 | 0,01998 | -0,47 | -1,39 | 0,20633 | ---             | C20orf103    |  |
| 8060940 | -0,94 | -1,92 | 0,03139 | -1,37 | -2,59 | 0,01529 | NM_012261       | GPATCH3      |  |
| 7913990 | -0,94 | -1,92 | 0,16924 | -1,07 | -2,10 | 0,00317 | NM_022078       | CCHCR1       |  |
| 8124868 | -0,94 | -1,92 | 0,00908 | -0,81 | -1,75 | 0,01925 | NM_001105564    | C11orf87     |  |
| 7943711 | -0,94 | -1,92 | 0,12286 | -1,72 | -3,29 | 0,02587 | NM_207645       | FRMPD1       |  |
| 8155284 | -0,94 | -1,92 | 0,04460 | -0,92 | -1,89 | 0,02163 | NM_014907       | C16orf89     |  |
| 7999291 | -0,94 | -1,92 | 0,04838 | -0,79 | -1,73 | 0,04613 | NM_152459       | LOC93432     |  |
| 8136709 | -0,94 | -1,92 | 0,10003 | -1,06 | -2,09 | 0,01378 | NR_003715       | UCP3         |  |
| 7950321 | -0,94 | -1,92 | 0,07325 | -0,96 | -1,94 | 0,00074 | NM_003356       | FLJ40504     |  |
| 8013574 | -0,94 | -1,92 | 0,12015 | -0,23 | -1,17 | 0,34799 | NR_028334       | LRRC14B      |  |
| 8104163 | -0,94 | -1,92 | 0,08655 | -0,34 | -1,27 | 0,41481 | NM_001080478    | TEKT5        |  |
| 7999396 | -0,94 | -1,92 | 0,01371 | -0,22 | -1,17 | 0,56456 | NM_144674       | ---          |  |
| 8115366 | -0,94 | -1,92 | 0,17701 | -1,08 | -2,11 | 0,00842 | ---             | MTRF1L       |  |
| 8098705 | -0,94 | -1,92 | 0,03793 | -0,51 | -1,42 | 0,25947 | NM_019041       | HSD3B2       |  |
| 7904408 | -0,94 | -1,92 | 0,05988 | -1,74 | -3,34 | 0,00022 | NM_000198       | TPRX1        |  |
| 8037947 | -0,94 | -1,92 | 0,11998 | -0,71 | -1,64 | 0,17459 | NM_198479       | CCL19        |  |
| 8160879 | -0,94 | -1,92 | 0,07935 | -1,30 | -2,47 | 0,01693 | NM_006274       | AGBL3        |  |
| 8136370 | -0,94 | -1,93 | 0,03317 | -0,84 | -1,79 | 0,01234 | NM_178563       | ---          |  |
| 7972565 | -0,94 | -1,93 | 0,02986 | -0,85 | -1,81 | 0,01815 | ---             | MCF2         |  |
| 8175457 | -0,95 | -1,93 | 0,00842 | -0,97 | -1,96 | 0,09695 | NM_001171876    | RGS7         |  |
| 7925457 | -0,95 | -1,93 | 0,01135 | -1,64 | -3,11 | 0,00544 | NM_002924       | ---          |  |
| 8045793 | -0,95 | -1,93 | 0,00927 | -1,20 | -2,30 | 0,01736 | ---             | RIMBP3C      |  |
| 8074769 | -0,95 | -1,93 | 0,01444 | -0,25 | -1,19 | 0,53110 | ENST00000331505 | ---          |  |
| 7917670 | -0,95 | -1,93 | 0,07910 | -1,24 | -2,37 | 0,01043 | ---             | ZNF847P      |  |
| 7924821 | -0,95 | -1,93 | 0,22020 | -1,25 | -2,38 | 0,07002 | AF387613        | HMG20B       |  |
| 8024660 | -0,95 | -1,93 | 0,03268 | 0,86  | 1,82  | 0,28879 | NM_006339       | PRG3         |  |
| 7948213 | -0,95 | -1,93 | 0,13443 | -1,07 | -2,09 | 0,05038 | NM_006093       | ---          |  |
| 8091676 | -0,95 | -1,93 | 0,02322 | -0,81 | -1,76 | 0,17239 | ---             | ---          |  |
| 7969370 | -0,95 | -1,93 | 0,13645 | -0,72 | -1,65 | 0,10921 | ---             | CHAD         |  |
| 8016718 | -0,95 | -1,93 | 0,01172 | -1,14 | -2,20 | 0,04696 | NM_001267       | CCRN4L       |  |
| 8097461 | -0,95 | -1,93 | 0,02860 | 0,12  | 1,09  | 0,74914 | NM_012118       | ---          |  |
| 8010210 | -0,95 | -1,93 | 0,00486 | -1,36 | -2,56 | 0,00385 | ---             | SGK223       |  |
| 8149250 | -0,95 | -1,93 | 0,04099 | 1,05  | 2,08  | 0,01532 | NM_001080826    | TNNT3        |  |
| 7937749 | -0,95 | -1,93 | 0,25672 | -1,50 | -2,84 | 0,03513 | NM_006757       | ---          |  |
| 8119896 | -0,95 | -1,93 | 0,09052 | -0,59 | -1,51 | 0,08133 | ---             | ---          |  |
| 7946676 | -0,95 | -1,93 | 0,23451 | -1,60 | -3,04 | 0,07723 | ---             | ---          |  |
| 7902615 | -0,95 | -1,93 | 0,07969 | -0,85 | -1,80 | 0,01519 | ---             | RPS6KL1      |  |
| 7980219 | -0,95 | -1,93 | 0,03241 | 0,06  | 1,04  | 0,82963 | NM_031464       | ---          |  |
| 8140530 | -0,95 | -1,93 | 0,03302 | -1,21 | -2,31 | 0,00178 | ---             | GRM7         |  |
| 8077472 | -0,95 | -1,93 | 0,16030 | -1,29 | -2,45 | 0,01558 | NM_181874       | GPR32        |  |
| 8030731 | -0,95 | -1,93 | 0,46602 | -0,99 | -1,99 | 0,00904 | NM_001506       | MIR101-2     |  |
| 8154176 | -0,95 | -1,93 | 0,08459 | -1,10 | -2,14 | 0,01351 | NR_029836       | LOC100130876 |  |
| 8010978 | -0,95 | -1,93 | 0,41021 | -2,01 | -4,03 | 0,04546 | AK130278        | ---          |  |
| 7984317 | -0,95 | -1,93 | 0,04772 | -0,84 | -1,79 | 0,00140 | ---             | ---          |  |
| 8016521 | -0,95 | -1,93 | 0,00664 | -1,24 | -2,35 | 0,00094 | ---             | GGNBP1       |  |
| 8118726 | -0,95 | -1,93 | 0,05235 | -1,32 | -2,50 | 0,06825 | NR_028361       | OR6C2        |  |
| 7955999 | -0,95 | -1,93 | 0,00973 | -1,37 | -2,59 | 0,00430 | NM_054105       | ---          |  |
| 7898721 | -0,95 | -1,93 | 0,21051 | -1,01 | -2,02 | 0,02359 | ---             | GATA3        |  |
| 7926105 | -0,95 | -1,93 | 0,02168 | -1,31 | -2,49 | 0,04345 | NM_001002295    | ZDHHC19      |  |
| 8093074 | -0,95 | -1,93 | 0,08960 | -1,62 | -3,07 | 0,03339 | NM_001039617    | RPL13AP17    |  |

|         |       |       |         |       |       |         |                 |           |
|---------|-------|-------|---------|-------|-------|---------|-----------------|-----------|
| 8133847 | -0,95 | -1,93 | 0,03297 | -0,95 | -1,94 | 0,00561 | NR_003680       | FCRL3     |
| 7921275 | -0,95 | -1,93 | 0,03275 | -1,47 | -2,77 | 0,01487 | NM_052939       | TMEM220   |
| 8012830 | -0,95 | -1,93 | 0,08322 | -1,07 | -2,09 | 0,00132 | NM_001004313    | ITIH1     |
| 8080445 | -0,95 | -1,93 | 0,02102 | -0,81 | -1,76 | 0,08858 | NM_002215       | SMOC1     |
| 7975390 | -0,95 | -1,93 | 0,17014 | -0,01 | -1,01 | 0,97419 | NM_001034852    | CPA3      |
| 8083260 | -0,95 | -1,93 | 0,10365 | -1,07 | -2,10 | 0,04185 | NM_001870       | KCNQ4     |
| 7900492 | -0,95 | -1,93 | 0,20751 | -0,06 | -1,04 | 0,90821 | NM_004700       | APOM      |
| 8118209 | -0,95 | -1,93 | 0,00011 | -0,65 | -1,57 | 0,18535 | NM_019101       | APOM      |
| 8178043 | -0,95 | -1,93 | 0,00011 | -0,65 | -1,57 | 0,18535 | NM_019101       | APOM      |
| 8179291 | -0,95 | -1,93 | 0,00011 | -0,65 | -1,57 | 0,18535 | NM_019101       | HABP2     |
| 7930561 | -0,95 | -1,93 | 0,03409 | -1,95 | -3,86 | 0,00008 | NM_004132       | CACNA2D2  |
| 8087691 | -0,95 | -1,93 | 0,04485 | 2,25  | 4,74  | 0,00889 | NM_001005505    | PRODH2    |
| 8036170 | -0,95 | -1,93 | 0,06462 | -1,54 | -2,90 | 0,00343 | ENST00000443172 | ---       |
| 7951091 | -0,95 | -1,93 | 0,05097 | -1,91 | -3,75 | 0,03901 | --- TKTL2       | ---       |
| 8103503 | -0,95 | -1,93 | 0,00897 | -0,99 | -1,98 | 0,00292 | NM_032136       | NWD1      |
| 8026587 | -0,95 | -1,93 | 0,04688 | -0,05 | -1,04 | 0,72285 | NM_001007525    | ---       |
| 8066459 | -0,95 | -1,93 | 0,05213 | 0,11  | 1,08  | 0,54641 | --- ---         | ---       |
| 7922295 | -0,95 | -1,93 | 0,00252 | -1,32 | -2,50 | 0,03628 | --- CHST2       | ---       |
| 8083214 | -0,95 | -1,93 | 0,04328 | -1,78 | -3,42 | 0,00400 | NM_004267       | LRRTM2    |
| 8114470 | -0,95 | -1,93 | 0,08710 | -1,30 | -2,46 | 0,03513 | NM_015564       | FLJ32742  |
| 8166585 | -0,95 | -1,93 | 0,08657 | -2,26 | -4,80 | 0,00100 | AK057304 GSDMD  | ---       |
| 8148642 | -0,95 | -1,93 | 0,05853 | -0,45 | -1,36 | 0,48842 | NM_024736       | ---       |
| 7938388 | -0,95 | -1,93 | 0,00915 | -0,67 | -1,59 | 0,08948 | --- PCDHB1      | ---       |
| 8108679 | -0,95 | -1,93 | 0,00326 | -0,71 | -1,64 | 0,02699 | NM_013340       | OR10A2    |
| 7938176 | -0,95 | -1,93 | 0,22332 | -1,85 | -3,62 | 0,02055 | NM_001004460    | CD207     |
| 8052916 | -0,95 | -1,93 | 0,28117 | -1,21 | -2,31 | 0,00972 | NM_015717       | MRGPRG    |
| 7945857 | -0,95 | -1,93 | 0,13267 | -1,06 | -2,08 | 0,00215 | NM_001164377    | ---       |
| 8146709 | -0,95 | -1,93 | 0,00901 | -1,06 | -2,09 | 0,02096 | --- 03. Sep     | ---       |
| 8073548 | -0,95 | -1,93 | 0,01657 | 3,67  | 12,73 | 0,00259 | NM_019106       | PAH       |
| 7965884 | -0,95 | -1,93 | 0,10876 | -1,29 | -2,45 | 0,00280 | NM_000277       | TRAM1L1   |
| 8102464 | -0,95 | -1,93 | 0,11132 | -0,99 | -1,98 | 0,00346 | NM_152402       | IQSEC2    |
| 8172858 | -0,95 | -1,93 | 0,12298 | -0,29 | -1,23 | 0,45093 | NM_001111125    | WDR78     |
| 7916789 | -0,95 | -1,93 | 0,03267 | -0,21 | -1,16 | 0,24129 | NM_024763       | RNF112    |
| 8005586 | -0,95 | -1,93 | 0,00007 | -0,41 | -1,33 | 0,18639 | NM_007148       | TRIML2    |
| 8104107 | -0,95 | -1,93 | 0,01095 | -0,83 | -1,77 | 0,03783 | NM_173553       | CCDC17    |
| 8167334 | -0,95 | -1,93 | 0,13657 | 0,60  | 1,51  | 0,02371 | NM_000377       | WAS       |
| 7915743 | -0,95 | -1,93 | 0,12739 | -0,94 | -1,92 | 0,07586 | NM_001114938    | ---       |
| 8084887 | -0,95 | -1,93 | 0,08506 | -1,13 | -2,19 | 0,00666 | --- MEP1A       | ---       |
| 8120088 | -0,95 | -1,93 | 0,09748 | -1,13 | -2,19 | 0,00462 | NM_005588       | ---       |
| 8098058 | -0,95 | -1,93 | 0,02498 | -1,20 | -2,30 | 0,00003 | --- FLJ32955    | ---       |
| 8055682 | -0,95 | -1,93 | 0,09643 | -1,18 | -2,26 | 0,00107 | AK057517 OTC    | ---       |
| 8166769 | -0,95 | -1,93 | 0,07217 | -1,45 | -2,74 | 0,00003 | NM_000531       | ADORA2A   |
| 8071899 | -0,95 | -1,93 | 0,06338 | -0,21 | -1,16 | 0,46226 | NM_000675       | UPF3A     |
| 7970370 | -0,95 | -1,93 | 0,42389 | -1,09 | -2,13 | 0,03760 | NM_023011       | MLC1      |
| 8076894 | -0,95 | -1,93 | 0,13492 | -1,98 | -3,94 | 0,03487 | NM_015166       | OR51J1    |
| 7938002 | -0,95 | -1,93 | 0,12864 | -1,32 | -2,50 | 0,02912 | ENST00000332043 | GLTPD1    |
| 7896917 | -0,95 | -1,93 | 0,09549 | -0,68 | -1,61 | 0,03123 | NM_001029885    | SPNS3     |
| 8003861 | -0,95 | -1,93 | 0,02696 | -0,76 | -1,69 | 0,12785 | NM_182538       | LOC646057 |
| 7986563 | -0,95 | -1,93 | 0,02006 | -1,34 | -2,53 | 0,02337 | ENST00000451896 | OR11H6    |
| 7973030 | -0,95 | -1,94 | 0,03871 | -1,86 | -3,62 | 0,01202 | NM_001004480    | C19orf59  |
| 8025285 | -0,95 | -1,94 | 0,03591 | -0,60 | -1,51 | 0,01630 | NM_174918       | SCGB3A1   |
| 8116439 | -0,95 | -1,94 | 0,07858 | -1,19 | -2,28 | 0,07541 | NM_052863       | ---       |
| 7949672 | -0,95 | -1,94 | 0,04766 | -1,74 | -3,34 | 0,00636 | --- MRPL23      | ---       |
| 7937763 | -0,95 | -1,94 | 0,10826 | -1,93 | -3,80 | 0,00064 | NM_021134       | EPS8L3    |
| 7918394 | -0,95 | -1,94 | 0,07706 | -1,74 | -3,35 | 0,00664 | NM_139053       | ---       |
| 8026005 | -0,95 | -1,94 | 0,14934 | -0,64 | -1,56 | 0,19571 | --- FLJ39632    | ---       |
| 7973002 | -0,95 | -1,94 | 0,05034 | -1,47 | -2,77 | 0,00177 | AK096951 ---    | ---       |
| 8040101 | -0,95 | -1,94 | 0,05454 | -0,96 | -1,95 | 0,00124 | --- C7orf62     | ---       |
| 8140852 | -0,95 | -1,94 | 0,08132 | -0,36 | -1,28 | 0,03418 | BC028365 ---    | ---       |
| 7965677 | -0,95 | -1,94 | 0,11893 | -0,94 | -1,93 | 0,00768 | --- HRNBP3      | ---       |
| 8019005 | -0,95 | -1,94 | 0,10661 | -0,66 | -1,58 | 0,10174 | NM_001082575    | PROC      |
| 8045018 | -0,95 | -1,94 | 0,04286 | -0,47 | -1,38 | 0,31581 | NM_000312       | FCGBP     |
| 8036787 | -0,95 | -1,94 | 0,09611 | -0,80 | -1,74 | 0,19970 | NM_003890       | C9orf62   |
| 8159239 | -0,95 | -1,94 | 0,01321 | -1,57 | -2,98 | 0,02728 | BC034752 CD8A   | ---       |
| 8053584 | -0,95 | -1,94 | 0,13495 | -1,57 | -2,96 | 0,00114 | NM_001768       | ---       |
| 8072960 | -0,95 | -1,94 | 0,00666 | -2,38 | -5,21 | 0,00015 | --- PAFAH1B3    | ---       |
| 8037170 | -0,95 | -1,94 | 0,18078 | 2,50  | 5,66  | 0,02697 | NM_002573       | ITGAX     |
| 7995128 | -0,95 | -1,94 | 0,00306 | -0,91 | -1,88 | 0,09648 | NM_000887       | UBE2U     |
| 7901982 | -0,95 | -1,94 | 0,16444 | -0,49 | -1,40 | 0,09054 | NM_152489       | LOC644714 |
| 8161943 | -0,95 | -1,94 | 0,02775 | -1,53 | -2,88 | 0,07180 | BC047037 ---    | ---       |
| 8078284 | -0,95 | -1,94 | 0,02863 | -1,47 | -2,77 | 0,01060 | --- CTNNA3      | ---       |
| 7933904 | -0,95 | -1,94 | 0,12859 | -1,00 | -1,99 | 0,12941 | NM_013266       | P2RY4     |
| 8173366 | -0,95 | -1,94 | 0,16416 | -2,23 | -4,70 | 0,00386 | NM_002565       | SCN11A    |

|         |       |       |         |       |       |         |              |           |
|---------|-------|-------|---------|-------|-------|---------|--------------|-----------|
| 8086283 | -0,95 | -1,94 | 0,00324 | -1,10 | -2,15 | 0,00601 | NM_014139    | FPR3      |
| 8030866 | -0,95 | -1,94 | 0,00550 | -1,14 | -2,21 | 0,01032 | NM_002030    | RCSA1     |
| 7907079 | -0,95 | -1,94 | 0,10883 | -1,59 | -3,01 | 0,00231 | NM_052862    | ---       |
| 7913663 | -0,95 | -1,94 | 0,03981 | -1,54 | -2,91 | 0,02025 | ---          | ---       |
| 7925609 | -0,95 | -1,94 | 0,01445 | -1,16 | -2,23 | 0,03043 | ---          | ---       |
| 7967702 | -0,95 | -1,94 | 0,26315 | -1,09 | -2,13 | 0,00151 | ---          | CLCNKB    |
| 7898314 | -0,95 | -1,94 | 0,02642 | -1,20 | -2,29 | 0,14385 | NM_000085    | LTB4R2    |
| 7973694 | -0,96 | -1,94 | 0,02848 | -0,92 | -1,89 | 0,03725 | NM_001164692 | SNORD61   |
| 8175432 | -0,96 | -1,94 | 0,00714 | -1,21 | -2,31 | 0,04549 | NR_002735    | ---       |
| 8164848 | -0,96 | -1,94 | 0,05753 | -1,50 | -2,82 | 0,01225 | ---          | NXF3      |
| 8174207 | -0,96 | -1,94 | 0,04828 | -0,66 | -1,59 | 0,01543 | NM_022052    | RFX1      |
| 8034722 | -0,96 | -1,94 | 0,03862 | -0,19 | -1,14 | 0,56881 | NM_002918    | ---       |
| 8073013 | -0,96 | -1,94 | 0,26546 | -0,60 | -1,52 | 0,04169 | ---          | ---       |
| 7919560 | -0,96 | -1,94 | 0,14451 | -1,83 | -3,56 | 0,00183 | ---          | CYP11A1   |
| 7990333 | -0,96 | -1,94 | 0,15497 | -0,66 | -1,58 | 0,03982 | NM_000781    | ---       |
| 8093974 | -0,96 | -1,94 | 0,05659 | -1,14 | -2,21 | 0,02631 | ---          | SOX4      |
| 8117165 | -0,96 | -1,94 | 0,09127 | -0,93 | -1,91 | 0,06598 | NM_003107    | GSX2      |
| 8095074 | -0,96 | -1,94 | 0,30907 | -1,56 | -2,95 | 0,00097 | NM_133267    | C5orf47   |
| 8110068 | -0,96 | -1,94 | 0,08042 | -0,71 | -1,64 | 0,01813 | NM_001144954 | KLHL6     |
| 8092392 | -0,96 | -1,94 | 0,08662 | -0,92 | -1,90 | 0,04006 | NM_130446    | OR8B4     |
| 7952402 | -0,96 | -1,94 | 0,14432 | -1,11 | -2,15 | 0,05778 | NM_001005196 | PSG9      |
| 8037290 | -0,96 | -1,94 | 0,04406 | -2,63 | -6,19 | 0,01006 | NM_002784    | C21orf121 |
| 8068735 | -0,96 | -1,94 | 0,09476 | -1,19 | -2,28 | 0,00333 | NR_027273    | C14orf49  |
| 7981161 | -0,96 | -1,94 | 0,03916 | -0,40 | -1,32 | 0,46184 | NM_152592    | CNFN      |
| 8037179 | -0,96 | -1,94 | 0,00966 | 0,11  | 1,08  | 0,77973 | NM_032488    | ---       |
| 7952396 | -0,96 | -1,94 | 0,12433 | -0,81 | -1,76 | 0,15074 | ---          | ---       |
| 7957275 | -0,96 | -1,94 | 0,04518 | -1,20 | -2,30 | 0,04136 | ---          | GLRA4     |
| 8174263 | -0,96 | -1,94 | 0,03901 | -1,11 | -2,16 | 0,08023 | NM_001024452 | ---       |
| 8005155 | -0,96 | -1,94 | 0,00932 | -1,23 | -2,35 | 0,00737 | ---          | CXCR4     |
| 8055465 | -0,96 | -1,94 | 0,00080 | 0,78  | 1,71  | 0,10223 | NM_001008540 | CD300LB   |
| 8018169 | -0,96 | -1,94 | 0,02449 | -1,67 | -3,19 | 0,01170 | NM_174892    | ZNF345    |
| 8028206 | -0,96 | -1,94 | 0,00917 | -0,27 | -1,20 | 0,48300 | NM_003419    | SULT4A1   |
| 8076644 | -0,96 | -1,94 | 0,02721 | 0,36  | 1,29  | 0,43318 | NM_014351    | KRT86     |
| 7955624 | -0,96 | -1,94 | 0,05428 | -0,40 | -1,32 | 0,39539 | NM_002284    | ---       |
| 7933086 | -0,96 | -1,94 | 0,01292 | -1,33 | -2,52 | 0,00815 | ---          | MAGEA8    |
| 8170412 | -0,96 | -1,94 | 0,12101 | -1,92 | -3,79 | 0,00070 | NM_001166400 | SSPO      |
| 8137183 | -0,96 | -1,94 | 0,05861 | -1,81 | -3,52 | 0,00195 | NM_198455    | ---       |
| 8097415 | -0,96 | -1,94 | 0,01004 | -0,51 | -1,42 | 0,03302 | ---          | RXRA      |
| 8159127 | -0,96 | -1,94 | 0,08429 | 1,70  | 3,25  | 0,02342 | NM_002957    | ---       |
| 8119827 | -0,96 | -1,94 | 0,00546 | -0,79 | -1,73 | 0,00031 | ---          | ---       |
| 7971373 | -0,96 | -1,94 | 0,05472 | -0,77 | -1,71 | 0,05769 | ---          | ---       |
| 8104392 | -0,96 | -1,94 | 0,01578 | -0,67 | -1,60 | 0,08253 | ---          | GTPBP5    |
| 8063857 | -0,96 | -1,94 | 0,02487 | 0,62  | 1,54  | 0,20576 | NM_015666    | AP1S2     |
| 8171481 | -0,96 | -1,94 | 0,01264 | -0,95 | -1,93 | 0,00616 | NM_003916    | FAM82A1   |
| 8041519 | -0,96 | -1,94 | 0,11854 | -0,29 | -1,23 | 0,34570 | NM_001170792 | ---       |
| 7982661 | -0,96 | -1,94 | 0,00809 | -1,47 | -2,78 | 0,00006 | ---          | KIF19     |
| 8009602 | -0,96 | -1,94 | 0,01276 | -0,48 | -1,39 | 0,31878 | NM_153209    | ITPR1L1   |
| 8043597 | -0,96 | -1,94 | 0,35012 | -1,33 | -2,52 | 0,00150 | NM_178495    | PCSK4     |
| 8032232 | -0,96 | -1,94 | 0,00288 | -0,99 | -1,99 | 0,04473 | NM_017573    | ATP6V0E2  |
| 8137208 | -0,96 | -1,94 | 0,01816 | 0,14  | 1,10  | 0,54463 | NM_145230    | MAPK13    |
| 8119016 | -0,96 | -1,94 | 0,02530 | 1,74  | 3,35  | 0,00437 | NM_002754    | AFAP1     |
| 8094028 | -0,96 | -1,94 | 0,01835 | 1,00  | 2,00  | 0,01017 | NM_198595    | ---       |
| 8166353 | -0,96 | -1,94 | 0,10963 | -1,14 | -2,20 | 0,01643 | ---          | CCDC151   |
| 8034249 | -0,96 | -1,94 | 0,14603 | -0,75 | -1,68 | 0,01006 | NM_145045    | KIAA1522  |
| 7899821 | -0,96 | -1,94 | 0,00177 | 0,69  | 1,62  | 0,22782 | NM_020888    | ---       |
| 8119894 | -0,96 | -1,94 | 0,07660 | -1,14 | -2,20 | 0,00208 | ---          | C19orf46  |
| 8036232 | -0,96 | -1,94 | 0,11682 | -0,38 | -1,31 | 0,02334 | NM_001039876 | CYP27C1   |
| 8054967 | -0,96 | -1,94 | 0,05250 | -0,38 | -1,30 | 0,16823 | NM_001001665 | ---       |
| 7930954 | -0,96 | -1,94 | 0,03846 | -1,47 | -2,77 | 0,02857 | ---          | PTGES2    |
| 8164362 | -0,96 | -1,94 | 0,05816 | -0,41 | -1,33 | 0,40969 | NM_025072    | PANK4     |
| 7911730 | -0,96 | -1,94 | 0,16886 | 0,24  | 1,18  | 0,52352 | NM_018216    | ATP13A5   |
| 8092769 | -0,96 | -1,94 | 0,01361 | -0,88 | -1,83 | 0,03802 | NM_198505    | RNU11     |
| 7899502 | -0,96 | -1,94 | 0,11309 | -1,22 | -2,33 | 0,02176 | NR_004407    | PGK2      |
| 8126916 | -0,96 | -1,94 | 0,08380 | -1,19 | -2,28 | 0,01184 | NM_138733    | GPHB5     |
| 7979548 | -0,96 | -1,94 | 0,26785 | -1,96 | -3,90 | 0,00417 | NM_145171    | DCD       |
| 7963845 | -0,96 | -1,94 | 0,06437 | -1,59 | -3,01 | 0,00452 | NM_053283    | ---       |
| 8053710 | -0,96 | -1,94 | 0,08055 | -1,17 | -2,26 | 0,00260 | ---          | MUC4      |
| 8092978 | -0,96 | -1,94 | 0,00989 | -0,94 | -1,91 | 0,02643 | NM_018406    | HOXC5     |
| 7955887 | -0,96 | -1,94 | 0,04022 | 0,58  | 1,50  | 0,10193 | NM_018953    | ---       |
| 8023448 | -0,96 | -1,94 | 0,02868 | -0,88 | -1,84 | 0,04698 | ---          | OR52A1    |
| 7946025 | -0,96 | -1,94 | 0,18625 | -1,11 | -2,15 | 0,01105 | NM_012375    | ---       |
| 8083227 | -0,96 | -1,95 | 0,07732 | -1,19 | -2,28 | 0,00015 | ---          | CYP1A2    |
| 7984862 | -0,96 | -1,95 | 0,03009 | -0,74 | -1,67 | 0,00478 | NM_000761    | ---       |

|         |       |       |         |       |        |         |                      |              |                      |
|---------|-------|-------|---------|-------|--------|---------|----------------------|--------------|----------------------|
| 7965836 | -0,96 | -1,95 | 0,01204 | -1,18 | -2,27  | 0,00001 | ---                  | LIPH         |                      |
| 8092541 | -0,96 | -1,95 | 0,08575 | 4,74  | 26,68  | 0,00008 | NM_139248            |              | TMC1                 |
| 8155824 | -0,96 | -1,95 | 0,10539 | -0,65 | -1,57  | 0,00024 | NM_138691            |              | GRB14                |
| 8056327 | -0,96 | -1,95 | 0,00637 | 0,71  | 1,63   | 0,31221 | NM_004490            |              | POTED                |
| 8067844 | -0,96 | -1,95 | 0,03037 | -0,97 | -1,96  | 0,01801 | NM_174981            |              | MYLK3                |
| 8001163 | -0,96 | -1,95 | 0,01383 | -1,21 | -2,31  | 0,01186 | NM_182493            |              | ---                  |
| 8047172 | -0,96 | -1,95 | 0,00285 | -1,16 | -2,24  | 0,03978 | ---                  | 09. Mrz      |                      |
| 7956623 | -0,96 | -1,95 | 0,03005 | 1,14  | 2,21   | 0,00119 | NM_138396            |              | FGA                  |
| 8103311 | -0,96 | -1,95 | 0,00898 | 0,94  | 1,92   | 0,01980 | NM_000508            |              | ---                  |
| 8080956 | -0,96 | -1,95 | 0,20159 | -1,20 | -2,30  | 0,00567 | ---                  | HPCA         |                      |
| 7899841 | -0,96 | -1,95 | 0,24429 | 0,17  | 1,12   | 0,24250 | NM_002143            |              | ---                  |
| 8060368 | -0,96 | -1,95 | 0,05172 | -1,20 | -2,30  | 0,00106 | ---                  | KRTAP22-1    |                      |
| 8068151 | -0,96 | -1,95 | 0,00564 | -0,61 | -1,52  | 0,07586 | NM_181620            |              | PAX1                 |
| 8061357 | -0,96 | -1,95 | 0,08812 | -1,39 | -2,62  | 0,00856 | NM_006192            |              | ---                  |
| 8172030 | -0,96 | -1,95 | 0,10219 | -1,59 | -3,01  | 0,03274 | ---                  | SNORA62      |                      |
| 8078918 | -0,96 | -1,95 | 0,31597 | -0,76 | -1,70  | 0,24611 | NR_002324            |              | WISP3                |
| 8121532 | -0,96 | -1,95 | 0,00321 | -1,10 | -2,15  | 0,00734 | NM_198239            |              | ---                  |
| 7922908 | -0,96 | -1,95 | 0,01011 | -0,80 | -1,75  | 0,01471 | ---                  | C1orf127     |                      |
| 7912349 | -0,96 | -1,95 | 0,14783 | -1,68 | -3,21  | 0,06073 | NM_001170754         |              | SPTBN5               |
| 7987701 | -0,96 | -1,95 | 0,02609 | -0,77 | -1,71  | 0,00665 | NM_016642            |              | EMILIN2              |
| 8019912 | -0,96 | -1,95 | 0,04424 | -1,07 | -2,10  | 0,02658 | NM_032048            |              | P4HTM                |
| 8079677 | -0,96 | -1,95 | 0,00183 | 0,00  | -1,00  | 0,99212 | NM_177938            |              | MICAL3               |
| 8074274 | -0,96 | -1,95 | 0,01868 | 1,21  | 2,31   | 0,03272 | NM_015241            |              | LOC134466            |
| 8115205 | -0,96 | -1,95 | 0,01674 | -1,36 | -2,56  | 0,06838 | NR_026867            |              | TNK2                 |
| 8093013 | -0,96 | -1,95 | 0,08137 | -0,55 | -1,46  | 0,20044 | NM_005781            |              | CA8                  |
| 8150978 | -0,96 | -1,95 | 0,14795 | -0,59 | -1,50  | 0,00292 | NM_004056            |              | CXorf22              |
| 8166671 | -0,96 | -1,95 | 0,06034 | -1,32 | -2,50  | 0,00444 | NM_152632            |              | SLC6A1               |
| 8077833 | -0,96 | -1,95 | 0,01776 | -0,79 | -1,73  | 0,00010 | NM_003042            |              | PRSS45               |
| 8086669 | -0,96 | -1,95 | 0,07547 | -0,97 | -1,96  | 0,02812 | NM_199183            |              | ---                  |
| 8133959 | -0,96 | -1,95 | 0,10012 | -1,66 | -3,17  | 0,00278 | ---                  | OR5AN1       |                      |
| 7940171 | -0,96 | -1,95 | 0,11712 | -0,77 | -1,71  | 0,00500 | NM_001004729         |              | CLDN2                |
| 8169210 | -0,96 | -1,95 | 0,07180 | -0,03 | -1,02  | 0,90244 | NM_020384            |              | SREBF1               |
| 8013135 | -0,96 | -1,95 | 0,01880 | 0,69  | 1,61   | 0,22954 | NM_001005291         |              | CD37                 |
| 8030277 | -0,96 | -1,95 | 0,13653 | -1,23 | -2,34  | 0,00242 | NM_001774            |              | SPANXN4              |
| 8170282 | -0,96 | -1,95 | 0,11977 | -0,95 | -1,93  | 0,00072 | NM_001009613         |              | SLC10A3              |
| 8176109 | -0,96 | -1,95 | 0,07487 | -1,56 | -2,95  | 0,04165 | NM_019848            |              | MIR199B              |
| 8164396 | -0,96 | -1,95 | 0,14024 | -1,82 | -3,54  | 0,04270 | NR_029619            |              | BEX5                 |
| 8174141 | -0,96 | -1,95 | 0,02651 | -0,72 | -1,64  | 0,00310 | NM_001012978         |              | CX3CR1               |
| 8086344 | -0,96 | -1,95 | 0,20128 | -0,56 | -1,47  | 0,11149 | NM_001337            |              | NINJ2                |
| 7960253 | -0,96 | -1,95 | 0,18634 | -0,96 | -1,94  | 0,06335 | NM_016533            |              | SURF6                |
| 8164862 | -0,96 | -1,95 | 0,00953 | -0,74 | -1,67  | 0,02750 | NM_006753            |              | RHBDL2               |
| 7915184 | -0,96 | -1,95 | 0,00555 | -0,49 | -1,40  | 0,03009 | NM_017821            |              | ---                  |
| 8091281 | -0,96 | -1,95 | 0,00491 | -0,95 | -1,93  | 0,00957 | ---                  | LOC100128840 |                      |
| 7967700 | -0,96 | -1,95 | 0,02103 | -0,91 | -1,87  | 0,06980 | ENST00000415058      |              | PFKFB1               |
| 8173120 | -0,96 | -1,95 | 0,03938 | -0,79 | -1,73  | 0,17106 | NM_002625            |              | EHF                  |
| 7939314 | -0,96 | -1,95 | 0,01658 | 1,85  | 3,62   | 0,00572 | NM_012153            |              | PPP1R13L             |
| 8037563 | -0,96 | -1,95 | 0,01423 | 0,63  | 1,55   | 0,21369 | NM_006663            |              | PKHD1                |
| 8126954 | -0,97 | -1,95 | 0,00134 | -0,97 | -1,95  | 0,02366 | NM_138694            |              | UGT2B10              |
| 8095390 | -0,97 | -1,95 | 0,05389 | -0,70 | -1,62  | 0,14435 | NM_001075            |              | ---                  |
| 8141726 | -0,97 | -1,95 | 0,34909 | -1,37 | -2,59  | 0,03722 | ---                  | CARD17       |                      |
| 7951413 | -0,97 | -1,95 | 0,03488 | -1,00 | -2,01  | 0,02784 | NM_001007232         |              | RP11-93B14.6         |
| 8067543 | -0,97 | -1,95 | 0,24275 | -1,47 | -2,78  | 0,00011 | ENST00000370520      |              | SLC45A2              |
| 8111417 | -0,97 | -1,95 | 0,00833 | -0,71 | -1,63  | 0,00347 | NM_016180            |              | ---                  |
| 8086389 | -0,97 | -1,95 | 0,11786 | -0,81 | -1,75  | 0,08496 | ---                  | SNORA24      |                      |
| 8097056 | -0,97 | -1,95 | 0,02342 | -0,71 | -1,63  | 0,00545 | NR_002963            |              | AGRP                 |
| 8002051 | -0,97 | -1,95 | 0,13418 | -0,59 | -1,51  | 0,19929 | NM_001138            |              | CYP21A2              |
| 8118498 | -0,97 | -1,95 | 0,07274 | -0,63 | -1,54  | 0,24235 | NM_000500            |              | OR2L13               |
| 7911237 | -0,97 | -1,95 | 0,04219 | -1,33 | -2,52  | 0,00117 | NM_175911            |              | ---                  |
| 8100308 | -0,97 | -1,95 | 0,59761 | -5,91 | -60,31 | 0,00070 | ---                  | DISC1        |                      |
| 7910559 | -0,97 | -1,95 | 0,00156 | -0,73 | -1,65  | 0,03147 | NM_001164537         |              | DMRTA1               |
| 8154656 | -0,97 | -1,95 | 0,00379 | -1,06 | -2,09  | 0,01768 | NM_022160            |              | SYCE1                |
| 7937230 | -0,97 | -1,95 | 0,00129 | -1,19 | -2,29  | 0,00004 | NM_130784            |              | ---                  |
| 7985200 | -0,97 | -1,95 | 0,00006 | -0,91 | -1,88  | 0,00909 | ---                  | ZSCAN10      |                      |
| 7998921 | -0,97 | -1,95 | 0,02084 | -1,41 | -2,65  | 0,04942 | NM_032805            |              | HPSE2                |
| 7935613 | -0,97 | -1,95 | 0,12294 | -1,10 | -2,14  | 0,00033 | NM_021828            |              | C14orf50             |
| 7975081 | -0,97 | -1,95 | 0,03098 | -0,67 | -1,59  | 0,00229 | BC068989             |              | CLDN6                |
| 7998898 | -0,97 | -1,95 | 0,16430 | -1,77 | -3,42  | 0,00612 | NM_021195            |              | MFSD2B               |
| 8040516 | -0,97 | -1,95 | 0,13173 | -0,66 | -1,58  | 0,22132 | NM_001080473         |              | MUC15                |
| 7947156 | -0,97 | -1,95 | 0,06795 | -1,40 | -2,65  | 0,00689 | NM_001135091         |              | E2F8                 |
| 7947110 | -0,97 | -1,95 | 0,11634 | 2,05  | 4,15   | 0,00683 | NM_024680            |              | NLRP11               |
| 8039545 | -0,97 | -1,95 | 0,01758 | -0,95 | -1,93  | 0,04191 | NM_145007            |              | FLJ46121 // FLJ46121 |
| 8001108 | -0,97 | -1,95 | 0,05416 | -2,09 | -4,26  | 0,00185 | AK128823 // AK128823 |              | SELP                 |
| 7922200 | -0,97 | -1,95 | 0,04532 | -1,07 | -2,10  | 0,05368 | NM_003005            |              | ---                  |

|         |       |       |         |       |        |         |                 |              |
|---------|-------|-------|---------|-------|--------|---------|-----------------|--------------|
| 8126093 | -0,97 | -1,96 | 0,10404 | -1,86 | -3,63  | 0,03301 | ---             | ANGPTL7      |
| 7897675 | -0,97 | -1,96 | 0,08423 | -1,50 | -2,83  | 0,03551 | NM_021146       | MSH4         |
| 7902402 | -0,97 | -1,96 | 0,09538 | -1,41 | -2,66  | 0,02442 | NM_002440       | ASMTL        |
| 8177011 | -0,97 | -1,96 | 0,01752 | -0,39 | -1,31  | 0,38059 | NM_004192       | ---          |
| 8175570 | -0,97 | -1,96 | 0,01117 | -0,93 | -1,91  | 0,00031 | ---             | IGHV7-81     |
| 7981745 | -0,97 | -1,96 | 0,11090 | -1,35 | -2,54  | 0,09128 | ENST00000420380 | RALGPS1      |
| 8157949 | -0,97 | -1,96 | 0,00653 | 1,35  | 2,54   | 0,00332 | NM_014636       | DKK4         |
| 8150529 | -0,97 | -1,96 | 0,15752 | -1,18 | -2,27  | 0,04760 | NM_014420       | ---          |
| 7975282 | -0,97 | -1,96 | 0,06841 | -1,56 | -2,96  | 0,01525 | ---             | CLEC4F       |
| 8052908 | -0,97 | -1,96 | 0,13858 | -1,25 | -2,38  | 0,00047 | NM_173535       | LOC100129979 |
| 7982348 | -0,97 | -1,96 | 0,02344 | -1,49 | -2,81  | 0,02611 | ENST00000416633 | ---          |
| 8128075 | -0,97 | -1,96 | 0,09129 | -2,11 | -4,32  | 0,00047 | ---             | TRPV4        |
| 7966234 | -0,97 | -1,96 | 0,06942 | -0,56 | -1,48  | 0,16854 | NM_021625       | ARVCF        |
| 8074522 | -0,97 | -1,96 | 0,19461 | -0,80 | -1,74  | 0,20438 | NM_001670       | DNMT3L       |
| 8070730 | -0,97 | -1,96 | 0,02713 | -1,49 | -2,80  | 0,00514 | NM_013369       | TMEM146      |
| 8024971 | -0,97 | -1,96 | 0,01918 | -1,47 | -2,77  | 0,00182 | NM_152784       | SHBG         |
| 8004534 | -0,97 | -1,96 | 0,02712 | -1,14 | -2,20  | 0,02034 | NM_001040       | OR2A4        |
| 8129558 | -0,97 | -1,96 | 0,16777 | 1,28  | 2,43   | 0,01486 | NM_030908       | ---          |
| 8172803 | -0,97 | -1,96 | 0,13661 | -0,40 | -1,32  | 0,00198 | ---             | LHX6         |
| 8163936 | -0,97 | -1,96 | 0,06637 | -0,27 | -1,20  | 0,68464 | NM_014368       | ---          |
| 7944361 | -0,97 | -1,96 | 0,66942 | -1,96 | -3,88  | 0,07523 | ---             | AQP6         |
| 7955305 | -0,97 | -1,96 | 0,04347 | -1,38 | -2,60  | 0,00011 | NM_001652       | KRT35        |
| 8015301 | -0,97 | -1,96 | 0,05346 | -1,22 | -2,33  | 0,01251 | NM_002280       | ---          |
| 7976642 | -0,97 | -1,96 | 0,46622 | -5,07 | -33,59 | 0,00123 | ---             | ---          |
| 8171577 | -0,97 | -1,96 | 0,09358 | -1,09 | -2,13  | 0,00123 | ---             | OGFOD2       |
| 7959535 | -0,97 | -1,96 | 0,01633 | 0,57  | 1,48   | 0,29036 | NM_024623       | OFCC1        |
| 8123843 | -0,97 | -1,96 | 0,04726 | -0,97 | -1,96  | 0,01243 | AF520800        | ---          |
| 8162080 | -0,97 | -1,96 | 0,00756 | -1,10 | -2,15  | 0,07061 | ---             | CMTM5        |
| 7973403 | -0,97 | -1,96 | 0,03825 | -1,44 | -2,71  | 0,00220 | NM_138460       | ---          |
| 8110587 | -0,97 | -1,96 | 0,10441 | -1,09 | -2,13  | 0,02266 | ---             | KRTAP19-7    |
| 8069845 | -0,97 | -1,96 | 0,11914 | -0,24 | -1,18  | 0,15461 | NM_181614       | MIR519A2     |
| 8031027 | -0,97 | -1,96 | 0,02352 | -0,95 | -1,94  | 0,00678 | NR_030222       | AIM1L        |
| 7913938 | -0,97 | -1,96 | 0,05069 | -1,40 | -2,65  | 0,02679 | NM_001039775    | ---          |
| 8084605 | -0,97 | -1,96 | 0,11629 | -2,28 | -4,85  | 0,00090 | ---             | LOC284861    |
| 8074734 | -0,97 | -1,96 | 0,29377 | -3,56 | -11,76 | 0,02281 | AK128837        | PPP1R16A     |
| 8148888 | -0,97 | -1,96 | 0,04536 | 0,20  | 1,15   | 0,61622 | NM_032902       | C15orf28     |
| 7990027 | -0,97 | -1,96 | 0,14137 | -0,87 | -1,83  | 0,05510 | NR_026808       | CACNG3       |
| 7994152 | -0,97 | -1,96 | 0,01914 | -1,30 | -2,46  | 0,01901 | NM_006539       | GCM1         |
| 8127130 | -0,97 | -1,96 | 0,06198 | -0,92 | -1,90  | 0,04979 | NM_003643       | ---          |
| 8101778 | -0,97 | -1,96 | 0,00529 | -1,59 | -3,01  | 0,05200 | ---             | ---          |
| 7901338 | -0,97 | -1,96 | 0,00752 | -0,85 | -1,81  | 0,00417 | ---             | ---          |
| 8055643 | -0,97 | -1,96 | 0,01150 | -1,25 | -2,38  | 0,04812 | ---             | FLJ44124     |
| 8131042 | -0,97 | -1,96 | 0,09976 | -1,28 | -2,43  | 0,00043 | AK126112        | GPR135       |
| 7979426 | -0,97 | -1,96 | 0,04171 | -0,69 | -1,62  | 0,04515 | NM_022571       | DEFB128      |
| 8064319 | -0,97 | -1,96 | 0,06063 | -1,14 | -2,20  | 0,00472 | NM_001037732    | VWA5B2       |
| 8084382 | -0,97 | -1,96 | 0,00296 | -0,47 | -1,39  | 0,21439 | NM_138345       | BEND4        |
| 8100015 | -0,97 | -1,96 | 0,04586 | -0,11 | -1,08  | 0,73298 | NM_207406       | C14orf102    |
| 7980702 | -0,97 | -1,96 | 0,02317 | -0,02 | -1,01  | 0,96363 | NM_017970       | C1orf191     |
| 7901611 | -0,97 | -1,96 | 0,04515 | -0,44 | -1,36  | 0,04150 | ENST00000361350 | PP14571      |
| 8060101 | -0,97 | -1,96 | 0,11692 | -1,85 | -3,60  | 0,00067 | AK092442        | MBD3L3       |
| 8033356 | -0,97 | -1,96 | 0,18157 | -1,92 | -3,80  | 0,00933 | NM_001164425    | MBD3L3       |
| 8033359 | -0,97 | -1,96 | 0,18157 | -1,92 | -3,80  | 0,00933 | NM_001164425    | S100A7       |
| 7920252 | -0,97 | -1,96 | 0,14770 | -2,25 | -4,75  | 0,00091 | NM_002963       | SLCO1B3      |
| 7954330 | -0,97 | -1,96 | 0,00028 | 2,42  | 5,34   | 0,00868 | NM_019844       | BAIAP2L2     |
| 8076007 | -0,97 | -1,96 | 0,10679 | -0,02 | -1,01  | 0,96819 | NM_025045       | ---          |
| 8095035 | -0,97 | -1,96 | 0,11329 | -0,88 | -1,84  | 0,01026 | ---             | TUBA4B       |
| 8048518 | -0,97 | -1,96 | 0,09986 | -1,32 | -2,50  | 0,00800 | NR_003063       | ---          |
| 7948303 | -0,97 | -1,96 | 0,08551 | -1,25 | -2,38  | 0,00729 | ---             | DRD5         |
| 8094156 | -0,97 | -1,96 | 0,15113 | -1,67 | -3,18  | 0,02636 | NM_000798       | SLC6A7       |
| 8109236 | -0,97 | -1,96 | 0,06202 | -1,72 | -3,30  | 0,00004 | NM_014228       | TAS2R7       |
| 7961239 | -0,97 | -1,96 | 0,00263 | -0,81 | -1,76  | 0,04543 | NM_023919       | ---          |
| 8075059 | -0,97 | -1,96 | 0,05473 | -1,17 | -2,24  | 0,04247 | ---             | KCNC4        |
| 7903867 | -0,97 | -1,96 | 0,01907 | -0,29 | -1,22  | 0,21098 | NM_004978       | PCDHB11      |
| 8108729 | -0,97 | -1,96 | 0,01076 | -0,61 | -1,53  | 0,00043 | NM_018931       | DDX12        |
| 7953844 | -0,97 | -1,96 | 0,12181 | 0,63  | 1,55   | 0,26781 | NR_033399       | ---          |
| 8121116 | -0,97 | -1,96 | 0,02564 | -1,16 | -2,24  | 0,07242 | ---             | ACMSD        |
| 8045368 | -0,97 | -1,96 | 0,02808 | -1,32 | -2,50  | 0,01352 | NM_138326       | ---          |
| 8085813 | -0,97 | -1,96 | 0,05424 | -0,51 | -1,43  | 0,03199 | ---             | TLX3         |
| 8109969 | -0,97 | -1,96 | 0,15865 | -1,64 | -3,12  | 0,01427 | NM_021025       | ---          |
| 8131441 | -0,97 | -1,96 | 0,46860 | 0,56  | 1,48   | 0,30113 | ---             | AGTR1        |
| 8083240 | -0,97 | -1,96 | 0,10037 | -0,92 | -1,89  | 0,01405 | NM_031850       | PRPH         |
| 7955184 | -0,97 | -1,96 | 0,02484 | -0,73 | -1,65  | 0,02587 | NM_006262       | ---          |
| 7933176 | -0,97 | -1,96 | 0,03013 | -1,80 | -3,48  | 0,00039 | ---             | CORO6        |

|                               |       |       |         |       |       |         |                                     |              |
|-------------------------------|-------|-------|---------|-------|-------|---------|-------------------------------------|--------------|
| 8013947                       | -0,97 | -1,96 | 0,11803 | -0,25 | -1,19 | 0,50957 | NM_032854                           | FAM70B       |
| 7972936                       | -0,97 | -1,96 | 0,06979 | -1,37 | -2,58 | 0,01232 | NM_182614                           | SLC16A3      |
| 8010770                       | -0,97 | -1,96 | 0,14102 | 0,35  | 1,28  | 0,39072 | NM_001042422                        | ---          |
| 8042501                       | -0,97 | -1,96 | 0,08844 | -0,76 | -1,69 | 0,09838 | ---                                 | ---          |
| 8098287                       | -0,97 | -1,96 | 0,01154 | -1,08 | -2,11 | 0,01272 | ---                                 | KLF17        |
| 7900957                       | -0,97 | -1,96 | 0,03411 | -1,89 | -3,70 | 0,00601 | NM_173484                           | FLJ25694     |
| 7971915                       | -0,97 | -1,96 | 0,10211 | -0,94 | -1,92 | 0,04461 | AK127969                            | C12orf33     |
| 7960942                       | -0,97 | -1,96 | 0,00050 | -0,36 | -1,28 | 0,03164 | BC028195                            | RAG2         |
| 7947548                       | -0,97 | -1,96 | 0,02920 | -0,85 | -1,81 | 0,01897 | NM_000536                           | CELA3B       |
| 7898713                       | -0,97 | -1,96 | 0,18795 | -2,34 | -5,05 | 0,01408 | NM_007352                           | ---          |
| 8093683                       | -0,97 | -1,97 | 0,03710 | -1,43 | -2,70 | 0,01916 | ---                                 | LOC100129278 |
| 8040483                       | -0,97 | -1,97 | 0,00334 | -0,83 | -1,78 | 0,05499 | ENST00000405799                     | ZNF785       |
| 8000917                       | -0,97 | -1,97 | 0,04860 | -0,73 | -1,66 | 0,18086 | NM_152458                           | BSN          |
| 8079759                       | -0,97 | -1,97 | 0,04706 | -1,19 | -2,28 | 0,00120 | NM_003458                           | NDUFAF2      |
| 8105499                       | -0,97 | -1,97 | 0,13970 | -0,56 | -1,48 | 0,06419 | NM_174889                           | FOLR3        |
| 7942328                       | -0,98 | -1,97 | 0,16120 | -1,90 | -3,73 | 0,00153 | NM_000804                           | OR5T2        |
| 7948125                       | -0,98 | -1,97 | 0,05889 | -0,96 | -1,94 | 0,08091 | NM_001004746                        | OR6T1        |
| 7952382                       | -0,98 | -1,97 | 0,02015 | -1,31 | -2,48 | 0,02575 | NM_001005187                        | ---          |
| 7989309                       | -0,98 | -1,97 | 0,00962 | -0,81 | -1,75 | 0,03125 | ---                                 | ---          |
| 8026292                       | -0,98 | -1,97 | 0,01548 | -0,82 | -1,77 | 0,03802 | ---                                 | HIST2H2BF    |
| 7919604                       | -0,98 | -1,97 | 0,10538 | -3,27 | -9,66 | 0,00412 | AK092418                            | ---          |
| 8112647                       | -0,98 | -1,97 | 0,06329 | -1,24 | -2,37 | 0,01967 | ---                                 | ---          |
| 8081028                       | -0,98 | -1,97 | 0,08551 | -1,05 | -2,08 | 0,01046 | ---                                 | NFKBID       |
| 8036207                       | -0,98 | -1,97 | 0,00997 | -0,21 | -1,16 | 0,29525 | NM_139239                           | TMEM191A     |
| 8071541                       | -0,98 | -1,97 | 0,21427 | -2,13 | -4,37 | 0,00668 | NR_026815                           | SLC17A4      |
| 8117304                       | -0,98 | -1,97 | 0,04253 | -1,19 | -2,28 | 0,00058 | NM_005495                           | TUBAL3       |
| 7931852                       | -0,98 | -1,97 | 0,05023 | -1,21 | -2,31 | 0,00731 | NM_024803                           | RNF175       |
| 8103244                       | -0,98 | -1,97 | 0,18711 | -1,26 | -2,40 | 0,00409 | NM_173662                           | KRT78        |
| 7963555                       | -0,98 | -1,97 | 0,00295 | -0,89 | -1,85 | 0,09529 | NM_173352                           | C9orf11      |
| 8160511                       | -0,98 | -1,97 | 0,01887 | -0,72 | -1,65 | 0,00154 | NM_020641                           | ---          |
| 7917597                       | -0,98 | -1,97 | 0,05445 | -1,19 | -2,28 | 0,00088 | ---                                 | IGLL1        |
| 8074909                       | -0,98 | -1,97 | 0,10059 | -1,99 | -3,97 | 0,00150 | NM_020070                           | MIR301A      |
| 8017139                       | -0,98 | -1,97 | 0,10509 | -0,59 | -1,51 | 0,01089 | NR_029842                           | ---          |
| 8052678                       | -0,98 | -1,97 | 0,01936 | -0,98 | -1,97 | 0,00822 | ---                                 | ZNF775       |
| 8137228                       | -0,98 | -1,97 | 0,02830 | -1,38 | -2,59 | 0,00021 | NM_173680                           | RFX8         |
| 8054344                       | -0,98 | -1,97 | 0,05894 | -1,63 | -3,09 | 0,00022 | NM_001145664                        | TMEM90A      |
| 7980142                       | -0,98 | -1,97 | 0,02853 | -0,81 | -1,76 | 0,09594 | NM_001105579                        | SPN          |
| 7994603                       | -0,98 | -1,97 | 0,17361 | -0,92 | -1,89 | 0,04993 | NM_001030288                        | ---          |
| 8036865                       | -0,98 | -1,97 | 0,16295 | -0,73 | -1,66 | 0,04308 | ---                                 | FGF18        |
| 8109981                       | -0,98 | -1,97 | 0,06426 | -1,98 | -3,96 | 0,00160 | NM_003862                           | MIR7-3       |
| 8024896                       | -0,98 | -1,97 | 0,13990 | -1,48 | -2,79 | 0,00227 | NR_029607                           | MIR190       |
| 7984077                       | -0,98 | -1,97 | 0,02417 | -0,83 | -1,78 | 0,00190 | NR_029709                           | GPAT2        |
| 8053842                       | -0,98 | -1,97 | 0,10478 | -1,43 | -2,70 | 0,02240 | NM_207328                           | IFNA8        |
| 8154622                       | -0,98 | -1,97 | 0,09137 | -1,12 | -2,17 | 0,02296 | NM_002170                           | GIPR         |
| 8029728                       | -0,98 | -1,97 | 0,03403 | -0,06 | -1,04 | 0,76094 | NM_000164                           | LHX5         |
| 7966631                       | -0,98 | -1,97 | 0,06700 | -0,43 | -1,35 | 0,06896 | NM_022363                           | C20orf54     |
| 8064388                       | -0,98 | -1,97 | 0,07040 | -0,33 | -1,25 | 0,53701 | NM_033409                           | SH2B1        |
| 7994445                       | -0,98 | -1,97 | 0,01519 | 0,38  | 1,30  | 0,24856 | NM_015503                           | UBE2MP1 //   |
| UBE2MP1 // UBE2MP1 // UBE2MP1 |       |       |         |       |       |         |                                     |              |
| 8001111                       | -0,98 | -1,97 | 0,03691 | -1,05 | -2,06 | 0,02587 | NR_002837 // NR_002837 // NR_002837 |              |
| // NR_002837                  |       |       | ZDHHC11 |       |       |         |                                     |              |
| 8110721                       | -0,98 | -1,97 | 0,15904 | -1,06 | -2,09 | 0,20172 | NM_024786                           | PFN3         |
| 8116031                       | -0,98 | -1,97 | 0,08698 | -0,28 | -1,22 | 0,52363 | NM_001029886                        | POTEC        |
| 8022428                       | -0,98 | -1,97 | 0,11473 | -2,31 | -4,97 | 0,00566 | NM_001137671                        | OR1M1        |
| 8025456                       | -0,98 | -1,97 | 0,22019 | -1,32 | -2,50 | 0,08096 | NM_001004456                        | ---          |
| 7984255                       | -0,98 | -1,97 | 0,01032 | -0,56 | -1,47 | 0,00497 | ---                                 | KRT13        |
| 8015323                       | -0,98 | -1,97 | 0,00902 | -1,16 | -2,24 | 0,00348 | NM_153490                           | AZI1         |
| 8019108                       | -0,98 | -1,97 | 0,01218 | -0,83 | -1,78 | 0,03723 | NM_014984                           | ---          |
| 8098161                       | -0,98 | -1,97 | 0,03178 | -0,68 | -1,60 | 0,00144 | ---                                 | OR1411       |
| 7925761                       | -0,98 | -1,97 | 0,13220 | -0,70 | -1,63 | 0,27415 | NM_001004734                        | D2HGDH       |
| 8077238                       | -0,98 | -1,97 | 0,06082 | -0,41 | -1,33 | 0,37305 | NM_152783                           | OR2H2        |
| 8177706                       | -0,98 | -1,97 | 0,08757 | -1,59 | -3,01 | 0,01000 | NM_007160                           | OR2H2        |
| 8179009                       | -0,98 | -1,97 | 0,08757 | -1,59 | -3,01 | 0,01000 | NM_007160                           | SERPINI2     |
| 8091910                       | -0,98 | -1,97 | 0,02365 | -1,43 | -2,70 | 0,00022 | NM_006217                           | LOC100129827 |
| 7938416                       | -0,98 | -1,97 | 0,00464 | -0,77 | -1,70 | 0,18154 | ENST00000324928                     | IFI27L1      |
| 7976436                       | -0,98 | -1,97 | 0,05222 | 1,00  | 1,99  | 0,16618 | NM_145249                           | C2orf19      |
| 8059965                       | -0,98 | -1,97 | 0,00932 | -0,77 | -1,70 | 0,00913 | BC031945                            | OR10AD1      |
| 7962792                       | -0,98 | -1,97 | 0,05818 | -1,76 | -3,39 | 0,03671 | NM_001004134                        | DEFB109P1B   |
| 8149358                       | -0,98 | -1,97 | 0,54967 | -0,74 | -1,67 | 0,39957 | NR_003668                           | DEFB104A     |
| 8144457                       | -0,98 | -1,97 | 0,01607 | -1,25 | -2,38 | 0,00033 | NM_080389                           | DEFB104A     |
| 8149192                       | -0,98 | -1,97 | 0,01607 | -1,25 | -2,38 | 0,00033 | NM_080389                           | C3P1         |
| 8025522                       | -0,98 | -1,97 | 0,00580 | -1,38 | -2,59 | 0,01282 | NR_027300                           | GAR1         |
| 8096821                       | -0,98 | -1,97 | 0,07405 | -0,12 | -1,08 | 0,55121 | NM_018983                           | PFN4         |

|         |       |       |         |       |        |         |                 |           |
|---------|-------|-------|---------|-------|--------|---------|-----------------|-----------|
| 8050713 | -0,98 | -1,97 | 0,04876 | 0,98  | 1,97   | 0,00477 | NM_199346       | TCAP      |
| 8006896 | -0,98 | -1,97 | 0,09000 | -2,42 | -5,37  | 0,00010 | NM_003673       | VNN1      |
| 8129618 | -0,98 | -1,97 | 0,01525 | -1,23 | -2,34  | 0,00698 | NM_004666       | TPM4      |
| 8026513 | -0,98 | -1,97 | 0,00425 | -1,37 | -2,59  | 0,00042 | NM_001145160    | ---       |
| 8138007 | -0,98 | -1,97 | 0,14391 | -0,74 | -1,68  | 0,01159 | ---             | TECTB     |
| 7930487 | -0,98 | -1,97 | 0,04986 | -0,76 | -1,69  | 0,00384 | NM_058222       | PSORS1C3  |
| 8124897 | -0,98 | -1,97 | 0,10602 | -1,95 | -3,86  | 0,00056 | AY484516        | PSORS1C3  |
| 8179727 | -0,98 | -1,97 | 0,10602 | -1,95 | -3,86  | 0,00056 | AY484516        | TCTEX1D4  |
| 7915609 | -0,98 | -1,97 | 0,03652 | -1,65 | -3,15  | 0,02924 | NM_001013632    | ST8SIA5   |
| 8023121 | -0,98 | -1,97 | 0,04252 | -1,15 | -2,21  | 0,01062 | NM_013305       | PROKR1    |
| 8042413 | -0,98 | -1,97 | 0,08530 | -1,61 | -3,06  | 0,04209 | NM_138964       | CAND2     |
| 8077944 | -0,98 | -1,97 | 0,02889 | -1,73 | -3,33  | 0,01287 | NM_001162499    | TMEM86B   |
| 8039409 | -0,98 | -1,97 | 0,07244 | -0,97 | -1,96  | 0,01855 | NM_173804       | STON2     |
| 7980537 | -0,98 | -1,97 | 0,05523 | -0,41 | -1,33  | 0,04438 | NM_033104       | KIAA1530  |
| 8093476 | -0,98 | -1,97 | 0,01676 | -0,26 | -1,20  | 0,25145 | NM_020894       | FAM154B   |
| 7985398 | -0,98 | -1,97 | 0,02248 | -0,84 | -1,79  | 0,13022 | AK304339        | AQPEP     |
| 8107429 | -0,98 | -1,97 | 0,02105 | -0,85 | -1,80  | 0,02243 | NM_173800       | ---       |
| 8074210 | -0,98 | -1,97 | 0,09140 | -1,35 | -2,54  | 0,00656 | ---             | TRIM58    |
| 7911218 | -0,98 | -1,97 | 0,04238 | -1,43 | -2,70  | 0,00121 | NM_015431       | C16orf71  |
| 7993024 | -0,98 | -1,97 | 0,03670 | -1,04 | -2,06  | 0,01725 | NM_139170       | EFCAB5    |
| 8006085 | -0,98 | -1,97 | 0,02575 | -0,83 | -1,77  | 0,01803 | NM_198529       | ---       |
| 8101141 | -0,98 | -1,97 | 0,02211 | -0,32 | -1,24  | 0,04015 | ---             | TBC1D29   |
| 8006161 | -0,98 | -1,98 | 0,18696 | -0,72 | -1,64  | 0,00788 | NM_015594       | ALDH3A1   |
| 8013384 | -0,98 | -1,98 | 0,18015 | -0,86 | -1,81  | 0,02187 | NM_000691       | ---       |
| 8138598 | -0,98 | -1,98 | 0,08804 | -1,62 | -3,07  | 0,00033 | ---             | ---       |
| 7904016 | -0,98 | -1,98 | 0,02086 | -1,22 | -2,33  | 0,01770 | ---             | ---       |
| 7903391 | -0,98 | -1,98 | 0,07720 | -1,14 | -2,20  | 0,01163 | ---             | ZNF500    |
| 7999196 | -0,98 | -1,98 | 0,04492 | -0,29 | -1,22  | 0,19776 | NM_021646       | UMOD      |
| 7999936 | -0,98 | -1,98 | 0,07019 | -1,13 | -2,19  | 0,03043 | NM_003361       | LOC503543 |
| 7910184 | -0,98 | -1,98 | 0,01267 | -0,47 | -1,39  | 0,12077 | BC062736        | SIPA1     |
| 7941311 | -0,98 | -1,98 | 0,00676 | 0,04  | 1,03   | 0,93169 | NM_153253       | CYP2F1    |
| 8028984 | -0,98 | -1,98 | 0,17945 | -1,52 | -2,87  | 0,06645 | NM_000774       | PODXL     |
| 8142981 | -0,98 | -1,98 | 0,08702 | 1,51  | 2,85   | 0,00041 | NM_001018111    | ---       |
| 8122805 | -0,98 | -1,98 | 0,09336 | -1,23 | -2,34  | 0,00305 | ---             | 12. Sep   |
| 7999206 | -0,98 | -1,98 | 0,04233 | 0,53  | 1,45   | 0,06108 | NM_144605       | SPEG      |
| 8048551 | -0,98 | -1,98 | 0,05922 | -1,08 | -2,12  | 0,00595 | NM_005876       | APRT      |
| 8003401 | -0,98 | -1,98 | 0,00162 | 0,35  | 1,27   | 0,60023 | NM_000485       | TTLL8     |
| 8076882 | -0,98 | -1,98 | 0,07633 | -2,19 | -4,58  | 0,00346 | NM_001080447    | HOXB7     |
| 8016468 | -0,98 | -1,98 | 0,02246 | -0,15 | -1,11  | 0,53567 | NM_004502       | ---       |
| 7974916 | -0,98 | -1,98 | 0,04363 | -1,41 | -2,66  | 0,00005 | ---             | ---       |
| 8057929 | -0,98 | -1,98 | 0,06128 | -1,32 | -2,49  | 0,01785 | ---             | ---       |
| 7957629 | -0,98 | -1,98 | 0,14450 | -0,99 | -1,98  | 0,00515 | ---             | ---       |
| 7924203 | -0,98 | -1,98 | 0,00271 | -0,81 | -1,75  | 0,01930 | ---             | CCL1      |
| 8014160 | -0,98 | -1,98 | 0,21266 | -0,83 | -1,77  | 0,00912 | NM_002981       | EML2      |
| 8037621 | -0,98 | -1,98 | 0,05827 | 0,63  | 1,55   | 0,09327 | NM_012155       | SEC1      |
| 8030092 | -0,98 | -1,98 | 0,08970 | -2,45 | -5,45  | 0,02286 | NR_004401       | OR5B17    |
| 7948322 | -0,98 | -1,98 | 0,07393 | -1,28 | -2,42  | 0,04022 | NM_001005489    | FAM95B1   |
| 8155627 | -0,98 | -1,98 | 0,14970 | -0,94 | -1,92  | 0,06652 | AL833349        | FAM95B1   |
| 8161381 | -0,98 | -1,98 | 0,14970 | -0,94 | -1,92  | 0,06652 | AL833349        | ---       |
| 8098940 | -0,98 | -1,98 | 0,10197 | -1,30 | -2,46  | 0,00138 | ---             | ORAI1     |
| 7959294 | -0,98 | -1,98 | 0,05271 | 1,43  | 2,69   | 0,04329 | NM_032790       | ---       |
| 8143365 | -0,98 | -1,98 | 0,23242 | -0,46 | -1,37  | 0,05248 | ---             | ---       |
| 8116573 | -0,98 | -1,98 | 0,00455 | -1,20 | -2,30  | 0,00405 | ---             | GSTTP1    |
| 8074972 | -0,98 | -1,98 | 0,09045 | -1,57 | -2,96  | 0,00018 | NR_003081       | ---       |
| 8008702 | -0,98 | -1,98 | 0,02506 | -2,64 | -6,23  | 0,00034 | ---             | ---       |
| 8139697 | -0,98 | -1,98 | 0,00754 | -1,27 | -2,41  | 0,00571 | ---             | OR7E125P  |
| 8144496 | -0,98 | -1,98 | 0,51868 | -3,43 | -10,77 | 0,00001 | ENST00000420198 | LAT2      |
| 8133442 | -0,98 | -1,98 | 0,12506 | -0,16 | -1,12  | 0,64217 | NM_032464       | IL17B     |
| 8115014 | -0,99 | -1,98 | 0,05764 | -1,04 | -2,06  | 0,08577 | NM_014443       | LOC401433 |
| 8143939 | -0,99 | -1,98 | 0,07304 | -0,25 | -1,19  | 0,58595 | AK127717        | CYP2A6    |
| 8036969 | -0,99 | -1,98 | 0,02185 | -1,69 | -3,23  | 0,00258 | NM_000762       | KRT75     |
| 7963396 | -0,99 | -1,98 | 0,12876 | -1,63 | -3,09  | 0,00013 | NM_004693       | ---       |
| 8115344 | -0,99 | -1,98 | 0,02634 | -1,77 | -3,40  | 0,00074 | ---             | MAGEB6    |
| 8166571 | -0,99 | -1,98 | 0,01013 | -1,09 | -2,13  | 0,01875 | NM_173523       | ---       |
| 7932862 | -0,99 | -1,98 | 0,08980 | -0,62 | -1,54  | 0,05618 | ---             | IGDCC3    |
| 7989770 | -0,99 | -1,98 | 0,02400 | -0,77 | -1,70  | 0,06037 | NM_004884       | GUCY2C    |
| 7961455 | -0,99 | -1,98 | 0,10086 | -1,26 | -2,40  | 0,00032 | NM_004963       | AMDHD2    |
| 7992656 | -0,99 | -1,98 | 0,03307 | -1,49 | -2,81  | 0,04073 | NM_015944       | NT5C      |
| 8018297 | -0,99 | -1,98 | 0,01576 | -0,73 | -1,65  | 0,03164 | NM_014595       | ---       |
| 7928543 | -0,99 | -1,98 | 0,11004 | -1,06 | -2,08  | 0,10566 | ---             | PQLC1     |
| 8023914 | -0,99 | -1,98 | 0,04663 | -0,10 | -1,07  | 0,83683 | NM_025078       | NAP1L2    |
| 8173600 | -0,99 | -1,98 | 0,00989 | -0,60 | -1,51  | 0,06437 | NM_021963       | PPARGC1B  |
| 8109179 | -0,99 | -1,98 | 0,03023 | -0,07 | -1,05  | 0,85347 | NM_133263       | ---       |



|         |       |       |         |       |        |         |                 |           |          |
|---------|-------|-------|---------|-------|--------|---------|-----------------|-----------|----------|
| 8002967 | -0,99 | -1,98 | 0,01851 | -1,64 | -3,11  | 0,01600 | ---             | ---       |          |
| 8111812 | -0,99 | -1,98 | 0,17989 | -1,07 | -2,09  | 0,00475 | ---             | ---       |          |
| 8102829 | -0,99 | -1,98 | 0,18050 | -0,71 | -1,64  | 0,08269 | ---             | ---       |          |
| 8096839 | -0,99 | -1,98 | 0,00071 | -0,81 | -1,76  | 0,05986 | NM_198506       | ---       | LRIT3    |
| 7943049 | -0,99 | -1,98 | 0,02545 | -1,70 | -3,24  | 0,01726 | ---             | ---       | APOB     |
| 8050619 | -0,99 | -1,98 | 0,06865 | -2,04 | -4,12  | 0,01423 | NM_000384       | ---       |          |
| 7968796 | -0,99 | -1,98 | 0,01938 | -1,39 | -2,62  | 0,05948 | ---             | ---       |          |
| 7904014 | -0,99 | -1,98 | 0,04681 | -1,25 | -2,38  | 0,00179 | ---             | ---       |          |
| 8146322 | -0,99 | -1,98 | 0,11615 | -0,92 | -1,89  | 0,06611 | ---             | ---       | SCARNA14 |
| 7989922 | -0,99 | -1,98 | 0,00595 | -1,58 | -3,00  | 0,01997 | NR_004388       | MYL2      |          |
| 7966379 | -0,99 | -1,98 | 0,04858 | -0,91 | -1,88  | 0,00210 | NM_000432       | C14orf165 |          |
| 7978103 | -0,99 | -1,98 | 0,04998 | -1,22 | -2,32  | 0,00016 | NR_024081       | GPR55     |          |
| 8059674 | -0,99 | -1,98 | 0,00180 | -0,73 | -1,66  | 0,00348 | NM_005683       | IRS4      |          |
| 8174444 | -0,99 | -1,98 | 0,08513 | -1,32 | -2,50  | 0,02019 | NM_003604       | PAQR6     |          |
| 7920928 | -0,99 | -1,98 | 0,05710 | 0,21  | 1,16   | 0,45157 | NM_024897       | COL4A6    |          |
| 8174389 | -0,99 | -1,98 | 0,01587 | -0,91 | -1,87  | 0,00157 | NM_033641       | MACROD1   |          |
| 7949033 | -0,99 | -1,98 | 0,07902 | -0,78 | -1,71  | 0,03534 | NM_014067       | MIR202    |          |
| 7937148 | -0,99 | -1,98 | 0,05433 | -0,94 | -1,92  | 0,02100 | NR_030170       | ---       |          |
| 8167786 | -0,99 | -1,98 | 0,00609 | -0,64 | -1,56  | 0,00315 | ---             | ---       | ISM2     |
| 7980425 | -0,99 | -1,98 | 0,20119 | -0,11 | -1,08  | 0,70899 | NM_199296       | RFX6      |          |
| 8121649 | -0,99 | -1,98 | 0,11053 | -0,74 | -1,67  | 0,00172 | NM_173560       | C3orf47   |          |
| 8082517 | -0,99 | -1,98 | 0,11309 | -1,40 | -2,63  | 0,00179 | NR_026991       | ---       |          |
| 8117626 | -0,99 | -1,98 | 0,20170 | -1,92 | -3,79  | 0,01457 | ---             | ---       | OR8G2    |
| 7944834 | -0,99 | -1,98 | 0,35899 | -2,33 | -5,03  | 0,00043 | NM_001007249    | RN28S1    |          |
| 7942791 | -0,99 | -1,98 | 0,08722 | -3,82 | -14,14 | 0,00001 | NR_003287       | ---       |          |
| 7971913 | -0,99 | -1,98 | 0,00129 | -1,21 | -2,31  | 0,12975 | ---             | ---       | FAM124B  |
| 8059387 | -0,99 | -1,98 | 0,02439 | -1,14 | -2,21  | 0,02419 | NM_024785       | MIR26B    |          |
| 8048317 | -0,99 | -1,98 | 0,04172 | -1,13 | -2,18  | 0,01767 | NR_029500       | H1FOO     |          |
| 8082560 | -0,99 | -1,98 | 0,03862 | -1,59 | -3,00  | 0,00426 | NM_153833       | ---       |          |
| 8100454 | -0,99 | -1,98 | 0,06300 | -0,56 | -1,48  | 0,00585 | ---             | ---       | C12orf40 |
| 7954794 | -0,99 | -1,98 | 0,05528 | -1,00 | -2,00  | 0,00081 | NM_001031748    | ---       |          |
| 7989130 | -0,99 | -1,98 | 0,01335 | -1,00 | -2,00  | 0,00011 | ---             | ---       | TCTE1    |
| 8126674 | -0,99 | -1,98 | 0,00041 | 0,17  | 1,12   | 0,60158 | NM_182539       | ---       |          |
| 7955074 | -0,99 | -1,98 | 0,12924 | -0,71 | -1,64  | 0,00920 | ---             | ---       | MYO7B    |
| 8045030 | -0,99 | -1,98 | 0,01028 | -0,99 | -1,99  | 0,03606 | NM_001080527    | SNX32     |          |
| 7941408 | -0,99 | -1,98 | 0,06240 | -0,71 | -1,63  | 0,04540 | NM_152760       | TMEM229B  |          |
| 7979721 | -0,99 | -1,99 | 0,15652 | 0,01  | 1,01   | 0,98281 | NM_182526       | ---       |          |
| 7977773 | -0,99 | -1,99 | 0,12606 | -1,75 | -3,37  | 0,03822 | ---             | ---       | DNAJC30  |
| 8140107 | -0,99 | -1,99 | 0,16535 | -1,56 | -2,96  | 0,02163 | NM_032317       | OR2J1     |          |
| 8117712 | -0,99 | -1,99 | 0,00678 | -1,92 | -3,78  | 0,00239 | ENST00000377171 | OR7C1     |          |
| 8034890 | -0,99 | -1,99 | 0,00209 | -1,01 | -2,01  | 0,00419 | NM_198944       | MIR92A2   |          |
| 8175248 | -0,99 | -1,99 | 0,06341 | -1,01 | -2,02  | 0,00650 | NR_029509       | XAGE-4    |          |
| 8173176 | -0,99 | -1,99 | 0,06129 | -0,92 | -1,89  | 0,00816 | AJ318895        | TMIE      |          |
| 8079426 | -0,99 | -1,99 | 0,02266 | -0,20 | -1,15  | 0,12231 | NM_147196       | ---       |          |
| 7997700 | -0,99 | -1,99 | 0,04746 | -1,07 | -2,10  | 0,01123 | ---             | ---       | C6orf15  |
| 8179713 | -0,99 | -1,99 | 0,09394 | -1,25 | -2,38  | 0,00728 | NM_014070       | NANOG     |          |
| 7987365 | -0,99 | -1,99 | 0,06934 | -1,41 | -2,65  | 0,00594 | NM_024865       | LDHD      |          |
| 8002830 | -0,99 | -1,99 | 0,20328 | -0,44 | -1,36  | 0,02385 | NM_153486       | MSH5      |          |
| 8118259 | -0,99 | -1,99 | 0,00990 | 0,88  | 1,85   | 0,02854 | NM_002441       | PAX8      |          |
| 8054740 | -0,99 | -1,99 | 0,03405 | -0,95 | -1,94  | 0,01564 | NM_003466       | C1orf110  |          |
| 7921909 | -0,99 | -1,99 | 0,02992 | -1,01 | -2,02  | 0,00505 | NM_178550       | FTCD      |          |
| 8070933 | -0,99 | -1,99 | 0,00464 | -1,20 | -2,30  | 0,00070 | NM_006657       | ---       |          |
| 7974314 | -0,99 | -1,99 | 0,01763 | -1,34 | -2,53  | 0,03701 | ---             | ---       |          |
| 8111327 | -0,99 | -1,99 | 0,07115 | -1,04 | -2,05  | 0,03603 | ---             | ---       | FUT3     |
| 8033054 | -0,99 | -1,99 | 0,13309 | -0,72 | -1,64  | 0,06069 | NM_000149       | MAP3K9    |          |
| 7979943 | -0,99 | -1,99 | 0,05357 | 0,78  | 1,72   | 0,06506 | NM_033141       | DCC       |          |
| 8021245 | -0,99 | -1,99 | 0,00940 | -1,62 | -3,07  | 0,01792 | NM_005215       | C2CD4A    |          |
| 7984016 | -0,99 | -1,99 | 0,20998 | -0,73 | -1,66  | 0,12213 | NM_207322       | ---       |          |
| 8161986 | -0,99 | -1,99 | 0,00331 | -0,99 | -1,98  | 0,00024 | ---             | ---       |          |
| 8097478 | -0,99 | -1,99 | 0,00285 | -1,35 | -2,54  | 0,00060 | ---             | ---       |          |
| 8016213 | -0,99 | -1,99 | 0,21968 | -0,89 | -1,85  | 0,09530 | ---             | ---       | FAIM3    |
| 7923917 | -0,99 | -1,99 | 0,01542 | -0,76 | -1,69  | 0,04478 | NM_005449       | LOC283588 |          |
| 7980742 | -0,99 | -1,99 | 0,02627 | -0,09 | -1,06  | 0,68265 | ENST00000433659 | LOC554249 |          |
| 8155490 | -0,99 | -1,99 | 0,09934 | 0,14  | 1,10   | 0,65752 | AK292642        | CIITA     |          |
| 7993195 | -0,99 | -1,99 | 0,07630 | -1,28 | -2,43  | 0,00049 | NM_000246       | LOC442421 |          |
| 8155547 | -0,99 | -1,99 | 0,39800 | -1,39 | -2,63  | 0,04748 | NR_024496       | NPDC1     |          |
| 8165406 | -0,99 | -1,99 | 0,22772 | -0,74 | -1,67  | 0,06895 | NM_015392       | CRIP1     |          |
| 7977409 | -0,99 | -1,99 | 0,07314 | -0,64 | -1,56  | 0,08553 | NM_001311       | MIR451    |          |
| 8013784 | -0,99 | -1,99 | 0,00252 | -1,10 | -2,14  | 0,01211 | NR_029970       | ---       |          |
| 8117239 | -0,99 | -1,99 | 0,15876 | -2,18 | -4,52  | 0,00626 | ---             | ---       | CARD11   |
| 8137874 | -0,99 | -1,99 | 0,01598 | -1,00 | -2,00  | 0,02945 | NM_032415       | C1orf157  |          |
| 7923584 | -0,99 | -1,99 | 0,11894 | -1,53 | -2,88  | 0,00645 | NR_027902       | ZNF575    |          |
| 8029301 | -0,99 | -1,99 | 0,08091 | -1,73 | -3,31  | 0,00065 | NM_174945       | NES       |          |

|         |       |       |         |       |       |         |              |              |
|---------|-------|-------|---------|-------|-------|---------|--------------|--------------|
| 7921088 | -0,99 | -1,99 | 0,00624 | -1,31 | -2,47 | 0,01345 | NM_006617    | ---          |
| 8136977 | -0,99 | -1,99 | 0,14120 | -0,67 | -1,59 | 0,05165 | ---          | MUC5B        |
| 7937612 | -0,99 | -1,99 | 0,09481 | -1,15 | -2,22 | 0,03722 | NM_002458    | LOC100131373 |
| 8040469 | -0,99 | -1,99 | 0,11150 | -1,41 | -2,66 | 0,02960 | AY189285     | ---          |
| 8104661 | -0,99 | -1,99 | 0,01661 | -1,38 | -2,60 | 0,02657 | ---          | SYN2         |
| 8077879 | -0,99 | -1,99 | 0,31324 | -1,05 | -2,07 | 0,03754 | NM_133625    | MACC1        |
| 8138466 | -0,99 | -1,99 | 0,05792 | -0,33 | -1,25 | 0,32692 | NM_182762    | ---          |
| 8046084 | -0,99 | -1,99 | 0,00269 | -0,45 | -1,37 | 0,02002 | ---          | ---          |
| 7957958 | -0,99 | -1,99 | 0,08883 | -0,72 | -1,65 | 0,00125 | ---          | C22orf31     |
| 8075192 | -0,99 | -1,99 | 0,00866 | -0,71 | -1,64 | 0,02220 | BC126262     | FADD         |
| 7942168 | -0,99 | -1,99 | 0,00837 | 0,54  | 1,45  | 0,32239 | NM_003824    | PTPRR        |
| 7964907 | -0,99 | -1,99 | 0,02412 | -1,13 | -2,19 | 0,02430 | NM_002849    | TFAP2C       |
| 8063536 | -0,99 | -1,99 | 0,14023 | 2,72  | 6,57  | 0,00002 | NM_003222    | SEMA3G       |
| 8087907 | -0,99 | -1,99 | 0,04242 | -0,66 | -1,58 | 0,18615 | NM_020163    | EGLN3        |
| 7978544 | -0,99 | -1,99 | 0,01410 | 0,74  | 1,67  | 0,28621 | NM_022073    | ---          |
| 8139915 | -0,99 | -1,99 | 0,00304 | -0,95 | -1,93 | 0,01906 | ---          | ---          |
| 8007673 | -0,99 | -1,99 | 0,05798 | -0,61 | -1,53 | 0,15924 | ---          | CCDC114      |
| 8038048 | -0,99 | -1,99 | 0,01370 | -0,21 | -1,16 | 0,29986 | NM_144577    | MAP7D2       |
| 8171725 | -0,99 | -1,99 | 0,07567 | -1,03 | -2,04 | 0,16979 | NM_001168465 | ---          |
| 7916743 | -0,99 | -1,99 | 0,06228 | -1,30 | -2,47 | 0,02310 | ---          | ---          |
| 8066264 | -0,99 | -1,99 | 0,05648 | -1,30 | -2,46 | 0,06445 | ---          | C7orf27      |
| 8137847 | -0,99 | -1,99 | 0,14526 | -0,31 | -1,24 | 0,30106 | NM_152743    | RNF125       |
| 8020806 | -0,99 | -1,99 | 0,00484 | 1,87  | 3,65  | 0,00027 | NM_017831    | IGSF9        |
| 7921492 | -0,99 | -1,99 | 0,06704 | -0,86 | -1,81 | 0,23583 | NM_001135050 | GRID1        |
| 7934789 | -0,99 | -1,99 | 0,13036 | -1,26 | -2,40 | 0,00582 | NM_017551    | ---          |
| 7932418 | -0,99 | -1,99 | 0,04484 | -1,08 | -2,11 | 0,00419 | ---          | GDF1         |
| 8035539 | -0,99 | -1,99 | 0,00998 | -0,11 | -1,08 | 0,81923 | NM_001492    | SLC6A5       |
| 7938907 | -0,99 | -1,99 | 0,09114 | -0,91 | -1,87 | 0,01905 | NM_004211    | ZBTB22       |
| 8125731 | -0,99 | -1,99 | 0,06541 | -0,27 | -1,21 | 0,33537 | NM_005453    | LYG2         |
| 8054200 | -0,99 | -1,99 | 0,01315 | -1,19 | -2,29 | 0,00103 | NM_175735    | SH3BP1       |
| 8072847 | -0,99 | -1,99 | 0,00132 | -0,54 | -1,46 | 0,12693 | NM_018957    | SNORD96A     |
| 8116530 | -0,99 | -1,99 | 0,04675 | -0,91 | -1,88 | 0,21003 | NR_002592    | FKSG73       |
| 8043487 | -1,00 | -1,99 | 0,00704 | -1,22 | -2,33 | 0,00152 | NR_027714    | RIPPLY1      |
| 8174317 | -1,00 | -1,99 | 0,13381 | -1,39 | -2,62 | 0,02842 | NM_138382    | WEE1         |
| 7938366 | -1,00 | -1,99 | 0,02351 | -0,32 | -1,25 | 0,01301 | BX641032     | ---          |
| 7919160 | -1,00 | -1,99 | 0,00641 | -1,02 | -2,03 | 0,02476 | ---          | ---          |
| 7919166 | -1,00 | -1,99 | 0,00641 | -1,02 | -2,03 | 0,02476 | ---          | OR5J2        |
| 7939971 | -1,00 | -1,99 | 0,02306 | -1,09 | -2,13 | 0,01186 | NM_001005492 | ---          |
| 8003228 | -1,00 | -1,99 | 0,11516 | -1,10 | -2,14 | 0,00854 | ---          | GPR156       |
| 8089820 | -1,00 | -1,99 | 0,01455 | -0,09 | -1,06 | 0,72447 | NM_153002    | PYY          |
| 8015890 | -1,00 | -1,99 | 0,04099 | 1,45  | 2,73  | 0,01159 | NM_004160    | B9D2         |
| 8037018 | -1,00 | -1,99 | 0,09727 | -1,16 | -2,23 | 0,00903 | NM_030578    | ---          |
| 8008991 | -1,00 | -1,99 | 0,08561 | -0,75 | -1,68 | 0,00887 | ---          | ---          |
| 8047782 | -1,00 | -1,99 | 0,08059 | -0,60 | -1,52 | 0,31640 | ---          | CKM          |
| 8037525 | -1,00 | -1,99 | 0,04950 | -1,84 | -3,58 | 0,09311 | NM_001824    | OR8H3        |
| 7939969 | -1,00 | -1,99 | 0,08735 | -1,70 | -3,24 | 0,09314 | NM_001005201 | KCNA4        |
| 7947270 | -1,00 | -1,99 | 0,01078 | -0,66 | -1,58 | 0,13061 | NM_002233    | UNC93B1      |
| 8138147 | -1,00 | -1,99 | 0,19725 | -0,23 | -1,17 | 0,78042 | NM_030930    | ---          |
| 8149271 | -1,00 | -1,99 | 0,01249 | -1,68 | -3,21 | 0,00011 | ---          | ---          |
| 7906952 | -1,00 | -1,99 | 0,02334 | -0,83 | -1,77 | 0,01693 | ---          | OR4K15       |
| 7973018 | -1,00 | -1,99 | 0,05179 | -0,95 | -1,93 | 0,03890 | NM_001005486 | ---          |
| 7968926 | -1,00 | -1,99 | 0,09426 | -1,85 | -3,61 | 0,00337 | ---          | ZFP92        |
| 8170644 | -1,00 | -2,00 | 0,00360 | -0,42 | -1,34 | 0,12961 | NM_001136273 | ---          |
| 8106818 | -1,00 | -2,00 | 0,04286 | -0,60 | -1,51 | 0,08482 | ---          | TTC9         |
| 7975412 | -1,00 | -2,00 | 0,06902 | 1,74  | 3,34  | 0,00104 | NM_015351    | LRRC48       |
| 8005289 | -1,00 | -2,00 | 0,00113 | -0,93 | -1,90 | 0,14177 | NM_001130090 | LILRB1       |
| 8031223 | -1,00 | -2,00 | 0,08836 | -2,41 | -5,33 | 0,00046 | NM_006669    | CRTAM        |
| 7944739 | -1,00 | -2,00 | 0,01700 | -1,03 | -2,04 | 0,00313 | NM_019604    | DMRTC2       |
| 8029117 | -1,00 | -2,00 | 0,08215 | -1,71 | -3,27 | 0,00054 | NM_001040283 | AQP10        |
| 7905746 | -1,00 | -2,00 | 0,00308 | -1,81 | -3,50 | 0,00823 | NM_080429    | SCRT1        |
| 8153704 | -1,00 | -2,00 | 0,00207 | -1,68 | -3,20 | 0,00094 | NM_031309    | SYT17        |
| 7993624 | -1,00 | -2,00 | 0,00962 | 3,94  | 15,35 | 0,00028 | NM_016524    | MYH14        |
| 8030582 | -1,00 | -2,00 | 0,02328 | -0,14 | -1,10 | 0,69275 | NM_001145809 | MIR516B1     |
| 8031035 | -1,00 | -2,00 | 0,04419 | -0,77 | -1,71 | 0,21759 | NR_030212    | ABCA4        |
| 7917798 | -1,00 | -2,00 | 0,02850 | -0,95 | -1,93 | 0,10961 | NM_000350    | GAB4         |
| 8074212 | -1,00 | -2,00 | 0,02565 | -1,24 | -2,36 | 0,02600 | NM_001037814 | ---          |
| 8099447 | -1,00 | -2,00 | 0,00791 | -0,59 | -1,51 | 0,05127 | ---          | ---          |
| 8020375 | -1,00 | -2,00 | 0,00512 | -1,37 | -2,59 | 0,04354 | ---          | TMEM184A     |
| 8137783 | -1,00 | -2,00 | 0,04721 | 0,32  | 1,25  | 0,41845 | NM_001097620 | KPTN         |
| 8037898 | -1,00 | -2,00 | 0,01513 | -0,74 | -1,67 | 0,05453 | NM_007059    | C10orf67     |
| 7932542 | -1,00 | -2,00 | 0,03046 | -0,90 | -1,87 | 0,00422 | NM_153714    | VASH2        |
| 7909642 | -1,00 | -2,00 | 0,00973 | -1,07 | -2,10 | 0,01112 | NM_024749    | GPM6B        |
| 8171359 | -1,00 | -2,00 | 0,12509 | -0,38 | -1,30 | 0,07648 | NM_001001995 | LOC554249    |

|         |       |       |         |       |       |         |                 |         |              |
|---------|-------|-------|---------|-------|-------|---------|-----------------|---------|--------------|
| 8155550 | -1,00 | -2,00 | 0,05902 | 0,05  | 1,04  | 0,88469 | AK292642        | SCTR    |              |
| 8054846 | -1,00 | -2,00 | 0,02179 | -1,50 | -2,82 | 0,01107 | NM_002980       |         | ---          |
| 8135849 | -1,00 | -2,00 | 0,03125 | -1,07 | -2,10 | 0,02613 | ---             | FABP1   |              |
| 8053654 | -1,00 | -2,00 | 0,06518 | -0,88 | -1,84 | 0,00259 | NM_001443       |         | ---          |
| 7937988 | -1,00 | -2,00 | 0,13568 | -1,08 | -2,11 | 0,18235 | ---             | FGF4    |              |
| 7950030 | -1,00 | -2,00 | 0,03215 | -1,23 | -2,35 | 0,00391 | ENST00000425152 |         | CITED4       |
| 7915347 | -1,00 | -2,00 | 0,01047 | -0,55 | -1,47 | 0,33743 | NM_133467       |         | NMNAT3       |
| 8091087 | -1,00 | -2,00 | 0,07069 | 0,10  | 1,07  | 0,75889 | NM_178177       |         | MXN1         |
| 8144112 | -1,00 | -2,00 | 0,03816 | -0,59 | -1,50 | 0,02449 | NM_005515       |         | KCNH2        |
| 8143825 | -1,00 | -2,00 | 0,05277 | -0,69 | -1,62 | 0,19080 | NM_000238       |         | TRIB3        |
| 8060344 | -1,00 | -2,00 | 0,07203 | 2,26  | 4,79  | 0,00309 | NM_021158       |         | SIT1         |
| 8161017 | -1,00 | -2,00 | 0,03041 | -0,65 | -1,57 | 0,05448 | NM_014450       |         | FAM71C       |
| 7957790 | -1,00 | -2,00 | 0,25220 | -1,24 | -2,36 | 0,00553 | BC031221        | SLCO2A1 |              |
| 8090823 | -1,00 | -2,00 | 0,04689 | 2,96  | 7,77  | 0,00042 | NM_005630       |         | ---          |
| 7954206 | -1,00 | -2,00 | 0,07240 | -1,26 | -2,40 | 0,00006 | ---             | ZNF726  |              |
| 8027363 | -1,00 | -2,00 | 0,03919 | -1,15 | -2,22 | 0,04633 | BC046415        | DEFB1   |              |
| 8149097 | -1,00 | -2,00 | 0,03011 | -0,90 | -1,87 | 0,07983 | NM_005218       |         | CCNYL3       |
| 7995312 | -1,00 | -2,00 | 0,16663 | -0,60 | -1,51 | 0,04830 | ENST00000407030 |         | CLDN4        |
| 8133360 | -1,00 | -2,00 | 0,08402 | 1,55  | 2,92  | 0,01200 | NM_001305       |         | ---          |
| 8105318 | -1,00 | -2,00 | 0,00081 | -1,07 | -2,09 | 0,05536 | ---             | MATN1   |              |
| 7899595 | -1,00 | -2,00 | 0,00928 | -0,86 | -1,81 | 0,02016 | NM_002379       |         | XIRP2        |
| 8046062 | -1,00 | -2,00 | 0,03735 | -1,41 | -2,67 | 0,00216 | NM_152381       |         | ---          |
| 8055294 | -1,00 | -2,00 | 0,25451 | -1,06 | -2,09 | 0,05241 | ---             | IDI2    |              |
| 7931748 | -1,00 | -2,00 | 0,00107 | -0,90 | -1,87 | 0,04344 | NM_033261       |         | PCDH1        |
| 8114767 | -1,00 | -2,00 | 0,01679 | -1,87 | -3,66 | 0,00034 | NM_032420       |         | RND2         |
| 8007454 | -1,00 | -2,00 | 0,00302 | 1,53  | 2,89  | 0,05515 | NM_005440       |         | ---          |
| 7917431 | -1,00 | -2,00 | 0,03579 | -1,16 | -2,23 | 0,00564 | ---             | DLGAP4  |              |
| 8062293 | -1,00 | -2,00 | 0,05269 | -1,03 | -2,04 | 0,08716 | NM_014902       |         | MFSD2A       |
| 7900365 | -1,00 | -2,00 | 0,10433 | 0,33  | 1,25  | 0,17954 | NM_001136493    |         | ATG16L2      |
| 7942381 | -1,00 | -2,00 | 0,14150 | -0,23 | -1,17 | 0,47534 | NM_033388       |         | NUDT10       |
| 8167645 | -1,00 | -2,00 | 0,06847 | -1,91 | -3,75 | 0,00040 | NM_153183       |         | LOC100133207 |
| 7976554 | -1,00 | -2,00 | 0,01807 | -1,52 | -2,87 | 0,00168 | ENST00000420674 |         | EMILIN3      |
| 8066294 | -1,00 | -2,00 | 0,01079 | -1,05 | -2,07 | 0,00337 | NM_052846       |         | KCNN4        |
| 8037408 | -1,00 | -2,00 | 0,02817 | 0,13  | 1,10  | 0,41125 | NM_002250       |         | PROKR2       |
| 8064859 | -1,00 | -2,00 | 0,14227 | -1,21 | -2,31 | 0,05609 | NM_144773       |         | KRTAP13-1    |
| 8068130 | -1,00 | -2,00 | 0,05000 | -1,32 | -2,49 | 0,00656 | NM_181599       |         | NRG2         |
| 8114550 | -1,00 | -2,00 | 0,07975 | -0,73 | -1,66 | 0,03036 | NM_004883       |         | SH3GL2       |
| 8154476 | -1,00 | -2,00 | 0,02229 | 0,14  | 1,10  | 0,65778 | NM_003026       |         | C5orf60      |
| 8116313 | -1,00 | -2,00 | 0,21381 | 1,12  | 2,17  | 0,01814 | NM_001142306    |         | ---          |
| 8086417 | -1,00 | -2,00 | 0,30930 | -1,17 | -2,25 | 0,05252 | ---             | ---     |              |
| 7930137 | -1,00 | -2,00 | 0,00516 | -0,93 | -1,91 | 0,00616 | ---             | C1orf65 |              |
| 7909965 | -1,00 | -2,00 | 0,09351 | -1,61 | -3,05 | 0,00041 | NM_152610       |         | MIR27B       |
| 8156571 | -1,00 | -2,00 | 0,05335 | -0,45 | -1,37 | 0,01775 | NR_029665       |         | ZBTB7C       |
| 8023212 | -1,00 | -2,00 | 0,04816 | -1,27 | -2,42 | 0,00046 | NM_001039360    |         | ---          |
| 7947926 | -1,00 | -2,00 | 0,02439 | -1,24 | -2,36 | 0,00233 | ---             | GPR158  |              |
| 7926715 | -1,00 | -2,00 | 0,03127 | -0,86 | -1,81 | 0,01495 | NM_020752       |         | ---          |
| 8173890 | -1,00 | -2,00 | 0,05348 | -0,98 | -1,97 | 0,00301 | ---             | ---     |              |
| 8035863 | -1,00 | -2,00 | 0,18007 | -1,26 | -2,39 | 0,00952 | ---             | ---     |              |
| 8164194 | -1,00 | -2,00 | 0,09456 | -0,47 | -1,39 | 0,14980 | ---             | ---     |              |
| 7962236 | -1,00 | -2,00 | 0,03000 | -1,21 | -2,32 | 0,00234 | ---             | ---     |              |
| 8098496 | -1,00 | -2,00 | 0,10173 | -1,22 | -2,33 | 0,00256 | ---             | ---     |              |
| 7972979 | -1,00 | -2,00 | 0,11489 | -1,15 | -2,22 | 0,00010 | ---             | ---     |              |
| 8163712 | -1,00 | -2,00 | 0,09295 | -1,41 | -2,65 | 0,00014 | ---             | TRIM64  |              |
| 7943031 | -1,00 | -2,00 | 0,18573 | -1,05 | -2,07 | 0,13454 | NM_001136486    |         | TRIM64       |
| 7950965 | -1,00 | -2,00 | 0,18573 | -1,05 | -2,07 | 0,13454 | NM_001136486    |         | RBM38        |
| 8067203 | -1,00 | -2,01 | 0,07089 | -0,83 | -1,78 | 0,02370 | NM_017495       |         | SCARNA8      |
| 8160295 | -1,00 | -2,01 | 0,07479 | -1,72 | -3,30 | 0,01040 | NR_003009       |         | ---          |
| 7963233 | -1,00 | -2,01 | 0,00650 | -0,54 | -1,45 | 0,00432 | ---             | GPRIN2  |              |
| 7927277 | -1,00 | -2,01 | 0,15879 | -1,09 | -2,13 | 0,16349 | NM_014696       |         | JPH3         |
| 7997746 | -1,00 | -2,01 | 0,03933 | -1,54 | -2,90 | 0,01115 | NM_020655       |         | ZNF572       |
| 8148276 | -1,00 | -2,01 | 0,08993 | -0,48 | -1,40 | 0,38458 | NM_152412       |         | ---          |
| 7911213 | -1,00 | -2,01 | 0,03465 | -0,82 | -1,76 | 0,12868 | ---             | RIMBP3B |              |
| 8074591 | -1,00 | -2,01 | 0,07466 | 0,24  | 1,18  | 0,60967 | ENST00000357029 |         | AKT1S1       |
| 8038477 | -1,00 | -2,01 | 0,05630 | -0,53 | -1,45 | 0,41431 | NM_032375       |         | PARP10       |
| 8153609 | -1,00 | -2,01 | 0,00182 | -1,14 | -2,20 | 0,03888 | NM_032789       |         | RRP1         |
| 8068938 | -1,01 | -2,01 | 0,00460 | -0,02 | -1,02 | 0,95926 | NM_003683       |         | GOLGA2P2     |
| 8176910 | -1,01 | -2,01 | 0,05999 | -0,58 | -1,49 | 0,00483 | NR_001555       |         | GOLGA2P2     |
| 8177413 | -1,01 | -2,01 | 0,05999 | -0,58 | -1,49 | 0,00483 | NR_001555       |         | NHLRC4       |
| 7991898 | -1,01 | -2,01 | 0,01031 | -1,21 | -2,31 | 0,03690 | NM_176677       |         | ZBP1         |
| 8067221 | -1,01 | -2,01 | 0,05690 | -1,11 | -2,15 | 0,00089 | NM_030776       |         | DLG2         |
| 7950764 | -1,01 | -2,01 | 0,02816 | -1,30 | -2,46 | 0,00032 | NM_001364       |         | SUV420H2     |
| 8031466 | -1,01 | -2,01 | 0,08076 | -0,17 | -1,13 | 0,83884 | NM_032701       |         | DDX54        |
| 7966570 | -1,01 | -2,01 | 0,02194 | 0,62  | 1,54  | 0,31212 | NM_001111322    |         | ---          |

|         |       |       |         |       |        |         |                      |              |     |
|---------|-------|-------|---------|-------|--------|---------|----------------------|--------------|-----|
| 7946008 | -1,01 | -2,01 | 0,19498 | -1,46 | -2,75  | 0,00195 | ---                  | MIR1-1       | --- |
| 8063921 | -1,01 | -2,01 | 0,00712 | -1,16 | -2,24  | 0,02118 | NR_029780            | ---          | --- |
| 8094899 | -1,01 | -2,01 | 0,17319 | -0,90 | -1,87  | 0,07954 | ---                  | GABRA6       | --- |
| 8109651 | -1,01 | -2,01 | 0,04070 | -1,37 | -2,58  | 0,00420 | NM_000811            | ---          | --- |
| 8049042 | -1,01 | -2,01 | 0,09604 | -0,99 | -1,99  | 0,02717 | ---                  | FBXL6        | --- |
| 8153709 | -1,01 | -2,01 | 0,00720 | 0,03  | 1,02   | 0,96979 | NM_012162            | GSTA1        | --- |
| 8127072 | -1,01 | -2,01 | 0,01645 | -0,95 | -1,94  | 0,00238 | NM_145740            | C21orf74     | --- |
| 8068006 | -1,01 | -2,01 | 0,02373 | -0,70 | -1,62  | 0,06133 | AY077696             | ---          | --- |
| 8155596 | -1,01 | -2,01 | 0,53165 | -5,40 | -42,18 | 0,00005 | ---                  | ---          | --- |
| 8092132 | -1,01 | -2,01 | 0,03734 | -0,55 | -1,46  | 0,28544 | ---                  | SDK2         | --- |
| 8018114 | -1,01 | -2,01 | 0,00605 | -0,58 | -1,50  | 0,02339 | NM_001144952         | PLA2G2C      | --- |
| 7913235 | -1,01 | -2,01 | 0,04260 | -1,82 | -3,54  | 0,00765 | NM_001105572         | PSPN         | --- |
| 8033159 | -1,01 | -2,01 | 0,03361 | 0,48  | 1,40   | 0,29980 | NM_004158            | AVPR1B       | --- |
| 7909155 | -1,01 | -2,01 | 0,09450 | -0,94 | -1,92  | 0,11242 | NM_000707            | IGKC         | --- |
| 8043476 | -1,01 | -2,01 | 0,17476 | -2,18 | -4,52  | 0,00022 | ENST00000390273      | SLC9A2       | --- |
| 8044080 | -1,01 | -2,01 | 0,05294 | 1,01  | 2,01   | 0,00393 | NM_003048            | SSTR4        | --- |
| 8061366 | -1,01 | -2,01 | 0,13339 | -1,16 | -2,24  | 0,02331 | NM_001052            | EIF4E3       | --- |
| 8088803 | -1,01 | -2,01 | 0,05314 | 0,78  | 1,72   | 0,03740 | NM_173359            | SCARNA9L     | --- |
| 8171760 | -1,01 | -2,01 | 0,04277 | -0,44 | -1,36  | 0,31028 | NR_023358            | ---          | --- |
| 8011112 | -1,01 | -2,01 | 0,07836 | -1,66 | -3,16  | 0,00412 | ---                  | CCDC81       | --- |
| 7942941 | -1,01 | -2,01 | 0,04761 | -0,97 | -1,96  | 0,01378 | NM_001156474         | ---          | --- |
| 7998399 | -1,01 | -2,01 | 0,01411 | -0,62 | -1,53  | 0,02561 | ---                  | VMO1         | --- |
| 8011724 | -1,01 | -2,01 | 0,02894 | -0,26 | -1,20  | 0,40066 | NM_182566            | AFAP1L2      | --- |
| 7936439 | -1,01 | -2,01 | 0,05938 | 0,18  | 1,13   | 0,66559 | NM_001001936         | C6orf114     | --- |
| 8123981 | -1,01 | -2,01 | 0,00156 | -1,23 | -2,34  | 0,01108 | AF264036             | ---          | --- |
| 8042159 | -1,01 | -2,01 | 0,01083 | -1,19 | -2,27  | 0,03686 | ---                  | OR6K3        | --- |
| 7921422 | -1,01 | -2,01 | 0,05762 | -1,09 | -2,13  | 0,10731 | NM_001005327         | CLEC14A      | --- |
| 7978712 | -1,01 | -2,01 | 0,11210 | -0,88 | -1,84  | 0,03127 | NM_175060            | ---          | --- |
| 8006323 | -1,01 | -2,01 | 0,03936 | -1,60 | -3,02  | 0,00192 | ---                  | PPP1R9A      | --- |
| 8134351 | -1,01 | -2,01 | 0,05489 | 1,18  | 2,26   | 0,03160 | NM_001166160         | ZSWIM4       | --- |
| 8026198 | -1,01 | -2,01 | 0,05493 | -0,73 | -1,66  | 0,20780 | NM_023072            | FLJ43859     | --- |
| 8156098 | -1,01 | -2,01 | 0,00216 | -1,43 | -2,69  | 0,01466 | NM_001145197         | FAM27E3      | --- |
| 8161446 | -1,01 | -2,01 | 0,09507 | 0,75  | 1,69   | 0,01065 | BC032035             | ---          | --- |
| 8093152 | -1,01 | -2,01 | 0,00213 | -0,89 | -1,85  | 0,00126 | ---                  | GHDC         | --- |
| 8015575 | -1,01 | -2,01 | 0,03961 | -0,93 | -1,91  | 0,01048 | NR_024573            | ---          | --- |
| 8016042 | -1,01 | -2,01 | 0,34650 | -2,16 | -4,47  | 0,08307 | ---                  | ---          | --- |
| 8129315 | -1,01 | -2,01 | 0,13558 | -1,84 | -3,58  | 0,01154 | ---                  | LPA          | --- |
| 8130608 | -1,01 | -2,01 | 0,03074 | -0,94 | -1,92  | 0,08204 | NM_005577            | ---          | --- |
| 7909813 | -1,01 | -2,01 | 0,07249 | -1,30 | -2,46  | 0,00703 | ---                  | RNU2-1       | --- |
| 8019631 | -1,01 | -2,01 | 0,46387 | -2,57 | -5,92  | 0,00443 | NR_002716            | RNU2-1       | --- |
| 8019633 | -1,01 | -2,01 | 0,46387 | -2,57 | -5,92  | 0,00443 | NR_002716            | RNU2-1       | --- |
| 8019635 | -1,01 | -2,01 | 0,46387 | -2,57 | -5,92  | 0,00443 | NR_002716            | RNU2-1       | --- |
| 8019637 | -1,01 | -2,01 | 0,46387 | -2,57 | -5,92  | 0,00443 | NR_002716            | RNU2-1       | --- |
| 8019639 | -1,01 | -2,01 | 0,46387 | -2,57 | -5,92  | 0,00443 | NR_002716            | RNU2-1       | --- |
| 8019641 | -1,01 | -2,01 | 0,46387 | -2,57 | -5,92  | 0,00443 | NR_002716            | RNU2-1       | --- |
| 8019703 | -1,01 | -2,01 | 0,46387 | -2,57 | -5,92  | 0,00443 | NR_002716            | RNU2-1       | --- |
| 8019705 | -1,01 | -2,01 | 0,46387 | -2,57 | -5,92  | 0,00443 | NR_002716            | RNU2-1       | --- |
| 8019707 | -1,01 | -2,01 | 0,46387 | -2,57 | -5,92  | 0,00443 | NR_002716            | C8B          | --- |
| 7916526 | -1,01 | -2,01 | 0,01425 | -0,87 | -1,83  | 0,00700 | NM_000066            | PCDH11Y      | --- |
| 8176400 | -1,01 | -2,01 | 0,05335 | -1,28 | -2,42  | 0,00079 | NM_032971            | BRDT         | --- |
| 7902934 | -1,01 | -2,01 | 0,02339 | 3,03  | 8,16   | 0,00221 | NM_207189            | ---          | --- |
| 7931387 | -1,01 | -2,01 | 0,22743 | -1,37 | -2,59  | 0,00363 | ---                  | RIPK3        | --- |
| 7978312 | -1,01 | -2,01 | 0,00607 | -1,45 | -2,73  | 0,01525 | NM_006871            | MSLN         | --- |
| 7992071 | -1,01 | -2,01 | 0,07287 | -1,97 | -3,92  | 0,00601 | NM_005823            | IL16         | --- |
| 7985364 | -1,01 | -2,01 | 0,11266 | -1,36 | -2,56  | 0,00870 | NM_172217            | TYR          | --- |
| 7948085 | -1,01 | -2,01 | 0,05241 | -1,34 | -2,53  | 0,00042 | NM_000372            | C18orf12     | --- |
| 8021152 | -1,01 | -2,01 | 0,00566 | -1,73 | -3,31  | 0,00248 | AB027121             | ---          | --- |
| 8065016 | -1,01 | -2,01 | 0,00273 | -1,62 | -3,08  | 0,00225 | ---                  | ---          | --- |
| 7972563 | -1,01 | -2,01 | 0,00006 | -1,26 | -2,40  | 0,01381 | ---                  | OXER1        | --- |
| 8051793 | -1,01 | -2,01 | 0,13485 | -0,66 | -1,58  | 0,12621 | NM_148962            | KCNJ5        | --- |
| 7945146 | -1,01 | -2,01 | 0,06791 | -1,13 | -2,19  | 0,00056 | NM_000890            | ---          | --- |
| 8124455 | -1,01 | -2,01 | 0,20543 | -0,70 | -1,63  | 0,00109 | ---                  | FOXS1        | --- |
| 8065576 | -1,01 | -2,01 | 0,06141 | -1,65 | -3,14  | 0,00068 | NM_004118            | ---          | --- |
| 8093035 | -1,01 | -2,01 | 0,11771 | -1,59 | -3,02  | 0,00437 | ---                  | IGKC // IGKC | --- |
| 8043431 | -1,01 | -2,01 | 0,31639 | -3,02 | -8,09  | 0,01142 | AF113887 // AF113887 | CCDC108      | --- |
| 8059028 | -1,01 | -2,02 | 0,01299 | -1,29 | -2,44  | 0,00305 | NM_194302            | HTR2C        | --- |
| 8169447 | -1,01 | -2,02 | 0,00136 | -1,03 | -2,04  | 0,09419 | NM_000868            | KRT20        | --- |
| 8015124 | -1,01 | -2,02 | 0,03014 | -0,97 | -1,95  | 0,00796 | NM_019010            | ATOH1        | --- |
| 8096461 | -1,01 | -2,02 | 0,24882 | -1,66 | -3,15  | 0,00043 | NM_005172            | ---          | --- |
| 8092239 | -1,01 | -2,02 | 0,03059 | -1,29 | -2,44  | 0,04012 | ---                  | MIF4GD       | --- |
| 8018343 | -1,01 | -2,02 | 0,03028 | 2,24  | 4,72   | 0,00122 | NM_020679            | ---          | --- |
| 8156088 | -1,01 | -2,02 | 0,08368 | -0,45 | -1,37  | 0,01308 | ---                  | ---          | --- |
| 8055967 | -1,01 | -2,02 | 0,10035 | -1,05 | -2,07  | 0,06304 | ---                  | ---          | --- |

|         |       |       |         |       |       |         |              |             |  |
|---------|-------|-------|---------|-------|-------|---------|--------------|-------------|--|
| 7910492 | -1,01 | -2,02 | 0,05384 | -1,02 | -2,02 | 0,00294 | ---          | RABEP2      |  |
| 8000616 | -1,01 | -2,02 | 0,00671 | -1,49 | -2,81 | 0,00434 | NM_024816    | SLC22A3     |  |
| 8123246 | -1,01 | -2,02 | 0,02181 | 0,86  | 1,81  | 0,06055 | NM_021977    | S100A12     |  |
| 7920238 | -1,01 | -2,02 | 0,08343 | -1,50 | -2,83 | 0,05311 | NM_005621    | GABRA1      |  |
| 8109663 | -1,01 | -2,02 | 0,02453 | -1,01 | -2,01 | 0,00145 | NM_000806    | CDKN2D      |  |
| 8034075 | -1,01 | -2,02 | 0,09084 | -1,61 | -3,05 | 0,01289 | NM_001800    | CST8        |  |
| 8061389 | -1,01 | -2,02 | 0,01032 | -1,31 | -2,48 | 0,00134 | NM_005492    | TFAP2E      |  |
| 7900001 | -1,01 | -2,02 | 0,05653 | -1,47 | -2,78 | 0,02827 | NM_178548    | C1orf150    |  |
| 7911199 | -1,01 | -2,02 | 0,03991 | -1,44 | -2,72 | 0,01266 | NM_145278    | ---         |  |
| 7955987 | -1,01 | -2,02 | 0,47796 | -1,47 | -2,77 | 0,00084 | ---          | ---         |  |
| 7938878 | -1,01 | -2,02 | 0,05411 | -1,34 | -2,54 | 0,02057 | ---          | HIST2H3A    |  |
| 7905085 | -1,01 | -2,02 | 0,01844 | 0,45  | 1,37  | 0,15749 | NM_001005464 | HIST2H3A    |  |
| 7919614 | -1,01 | -2,02 | 0,01844 | 0,45  | 1,37  | 0,15749 | NM_001005464 | DNAJB8      |  |
| 8090464 | -1,01 | -2,02 | 0,04417 | -1,24 | -2,37 | 0,04173 | NM_153330    | ADRA1B      |  |
| 8109612 | -1,01 | -2,02 | 0,01454 | -0,35 | -1,27 | 0,26097 | NM_000679    | ---         |  |
| 8162529 | -1,01 | -2,02 | 0,11752 | -1,61 | -3,05 | 0,00286 | ---          | ---         |  |
| 8166661 | -1,01 | -2,02 | 0,07004 | -0,53 | -1,45 | 0,09447 | ---          | ---         |  |
| 8018814 | -1,01 | -2,02 | 0,06134 | -1,18 | -2,27 | 0,05181 | ---          | HEATR7A     |  |
| 8148808 | -1,01 | -2,02 | 0,13360 | -0,13 | -1,09 | 0,83645 | NM_032450    | GUCA1B      |  |
| 8126387 | -1,01 | -2,02 | 0,01614 | -0,68 | -1,60 | 0,30459 | NM_002098    | ---         |  |
| 8021438 | -1,01 | -2,02 | 0,05905 | -0,59 | -1,51 | 0,07449 | ---          | ---         |  |
| 8169439 | -1,01 | -2,02 | 0,05239 | -0,59 | -1,51 | 0,12041 | ---          | GSTA2       |  |
| 8127065 | -1,01 | -2,02 | 0,16289 | -0,25 | -1,19 | 0,04509 | NM_000846    | LRTM2       |  |
| 7953032 | -1,01 | -2,02 | 0,02162 | -1,30 | -2,47 | 0,01924 | NM_001039029 | ---         |  |
| 8057819 | -1,01 | -2,02 | 0,09400 | -0,87 | -1,83 | 0,04041 | ---          | ---         |  |
| 7944339 | -1,01 | -2,02 | 0,02279 | -0,84 | -1,78 | 0,08147 | ---          | EIF4A2      |  |
| 8084704 | -1,01 | -2,02 | 0,03559 | -1,38 | -2,60 | 0,02209 | AB209021     | SNORD116-22 |  |
| 7981992 | -1,01 | -2,02 | 0,01924 | -0,55 | -1,46 | 0,29914 | NR_003336    | TDRG1       |  |
| 8119386 | -1,01 | -2,02 | 0,09365 | -1,81 | -3,50 | 0,00364 | DQ168992     | ---         |  |
| 7956279 | -1,01 | -2,02 | 0,12738 | -1,19 | -2,28 | 0,00853 | ---          | GNB1L       |  |
| 8074481 | -1,01 | -2,02 | 0,01039 | -1,42 | -2,67 | 0,00670 | NM_053004    | ---         |  |
| 8021482 | -1,01 | -2,02 | 0,00964 | -1,36 | -2,56 | 0,00729 | ---          | HIST1H2BN   |  |
| 8117600 | -1,01 | -2,02 | 0,15315 | 0,55  | 1,46  | 0,16543 | NM_003520    | TELO2       |  |
| 7992271 | -1,01 | -2,02 | 0,14198 | -0,58 | -1,50 | 0,18974 | NM_016111    | NCRNA00200  |  |
| 7925870 | -1,01 | -2,02 | 0,01109 | -1,70 | -3,25 | 0,00021 | NR_015376    | R3HDM1      |  |
| 8062813 | -1,01 | -2,02 | 0,05192 | -0,67 | -1,59 | 0,11963 | NM_178491    | ---         |  |
| 8037003 | -1,01 | -2,02 | 0,09084 | -1,60 | -3,02 | 0,04212 | ---          | SLC2A4RG    |  |
| 8064175 | -1,01 | -2,02 | 0,03655 | -0,45 | -1,36 | 0,13171 | NM_020062    | FAM9C       |  |
| 8171338 | -1,01 | -2,02 | 0,00776 | -1,67 | -3,18 | 0,01337 | NM_174901    | FSTL5       |  |
| 8103466 | -1,01 | -2,02 | 0,08730 | -0,74 | -1,66 | 0,01113 | NM_020116    | SGSM1       |  |
| 8071953 | -1,01 | -2,02 | 0,16439 | -0,85 | -1,80 | 0,00149 | NM_001039948 | CD70        |  |
| 8033241 | -1,01 | -2,02 | 0,15996 | -0,90 | -1,87 | 0,04183 | NM_001252    | SNX18       |  |
| 8105328 | -1,01 | -2,02 | 0,04421 | -1,11 | -2,16 | 0,00884 | NM_052870    | ---         |  |
| 8109973 | -1,01 | -2,02 | 0,00531 | 0,49  | 1,41  | 0,21090 | ---          | ---         |  |
| 8119580 | -1,01 | -2,02 | 0,09086 | -0,67 | -1,59 | 0,00384 | ---          | NIPAL1      |  |
| 8094938 | -1,01 | -2,02 | 0,04631 | 1,13  | 2,19  | 0,05508 | NM_207330    | ---         |  |
| 7915731 | -1,02 | -2,02 | 0,00984 | -0,57 | -1,49 | 0,01472 | ---          | CTCF1       |  |
| 8067208 | -1,02 | -2,02 | 0,05315 | -0,97 | -1,96 | 0,00095 | NM_080618    | ATP13A4     |  |
| 8092800 | -1,02 | -2,02 | 0,01311 | -0,66 | -1,58 | 0,00033 | NM_032279    | RTP2        |  |
| 8092686 | -1,02 | -2,02 | 0,18809 | -1,15 | -2,21 | 0,04337 | NM_001004312 | FAM78B      |  |
| 7922001 | -1,02 | -2,02 | 0,00406 | -1,40 | -2,63 | 0,01807 | NM_001017961 | DNAJB7      |  |
| 8076292 | -1,02 | -2,02 | 0,08993 | -1,40 | -2,64 | 0,00002 | NM_145174    | WNT1        |  |
| 7955170 | -1,02 | -2,02 | 0,12929 | -1,19 | -2,28 | 0,12038 | NM_005430    | ---         |  |
| 7980576 | -1,02 | -2,02 | 0,08060 | -1,47 | -2,77 | 0,01182 | ---          | CHRNA3      |  |
| 8146230 | -1,02 | -2,02 | 0,00466 | -1,36 | -2,56 | 0,04304 | NM_000749    | CXorf50B    |  |
| 8168387 | -1,02 | -2,02 | 0,08173 | -0,09 | -1,06 | 0,85995 | NR_026594    | MIR133A1    |  |
| 8022498 | -1,02 | -2,02 | 0,14778 | -1,35 | -2,55 | 0,04147 | NR_029675    | FAM27E3     |  |
| 8155514 | -1,02 | -2,02 | 0,12593 | 0,86  | 1,81  | 0,00171 | BC032035     | PPM1H       |  |
| 7964646 | -1,02 | -2,02 | 0,00870 | 0,36  | 1,28  | 0,52084 | NM_020700    | ---         |  |
| 7993632 | -1,02 | -2,02 | 0,01529 | -1,46 | -2,75 | 0,04599 | ---          | C16orf47    |  |
| 8002706 | -1,02 | -2,02 | 0,07087 | -1,57 | -2,97 | 0,01565 | AK129695     | KCNK3       |  |
| 8040695 | -1,02 | -2,02 | 0,04422 | 0,25  | 1,19  | 0,73093 | NM_002246    | TAS1R1      |  |
| 7897295 | -1,02 | -2,02 | 0,03277 | -1,49 | -2,82 | 0,00288 | NM_138697    | PCSK1       |  |
| 8113234 | -1,02 | -2,02 | 0,00361 | -0,69 | -1,61 | 0,05027 | NM_000439    | TIGD5       |  |
| 8148655 | -1,02 | -2,02 | 0,02079 | 0,64  | 1,55  | 0,19828 | NM_032862    | STAP1       |  |
| 8095343 | -1,02 | -2,02 | 0,00716 | -0,97 | -1,96 | 0,00075 | NM_012108    | ---         |  |
| 8017141 | -1,02 | -2,02 | 0,00884 | -0,84 | -1,79 | 0,00168 | ---          | ---         |  |
| 8001102 | -1,02 | -2,02 | 0,16885 | -1,36 | -2,57 | 0,00008 | ---          | AFF3        |  |
| 8054254 | -1,02 | -2,02 | 0,01283 | 0,01  | 1,01  | 0,95874 | NM_002285    | FZD10       |  |
| 7959850 | -1,02 | -2,02 | 0,04218 | -1,52 | -2,86 | 0,00880 | NM_007197    | ---         |  |
| 7959249 | -1,02 | -2,02 | 0,10473 | -0,75 | -1,68 | 0,11798 | ---          | FRG2        |  |
| 8104124 | -1,02 | -2,02 | 0,20159 | -2,06 | -4,17 | 0,00412 | NM_001005217 | OR2G3       |  |
| 7911209 | -1,02 | -2,02 | 0,19753 | -1,09 | -2,12 | 0,02767 | NM_001001914 | BLNK        |  |

|         |       |       |         |       |       |         |                 |           |
|---------|-------|-------|---------|-------|-------|---------|-----------------|-----------|
| 7935270 | -1,02 | -2,02 | 0,01350 | -0,98 | -1,98 | 0,04231 | NM_013314       | ANKRD36B  |
| 8053834 | -1,02 | -2,02 | 0,11914 | 1,71  | 3,28  | 0,03053 | NM_025190       | FAM90A10  |
| 8144448 | -1,02 | -2,03 | 0,47047 | -2,17 | -4,49 | 0,00817 | NM_001164447    | ---       |
| 8081105 | -1,02 | -2,03 | 0,00120 | -1,35 | -2,55 | 0,06129 | ---             | ---       |
| 7927597 | -1,02 | -2,03 | 0,02664 | -0,65 | -1,57 | 0,03761 | ---             | CALML5    |
| 7931859 | -1,02 | -2,03 | 0,01379 | -1,32 | -2,50 | 0,05707 | NM_017422       | PLEKHG7   |
| 7957514 | -1,02 | -2,03 | 0,04125 | -0,70 | -1,62 | 0,02731 | NM_001004330    | ---       |
| 7969609 | -1,02 | -2,03 | 0,00538 | -0,50 | -1,41 | 0,03786 | ---             | GOLGA6L10 |
| 7990943 | -1,02 | -2,03 | 0,40386 | -0,39 | -1,31 | 0,43710 | NM_001164465    | ACCN1     |
| 8014144 | -1,02 | -2,03 | 0,01792 | -1,86 | -3,62 | 0,01491 | NM_183377       | CLPP      |
| 8025028 | -1,02 | -2,03 | 0,09767 | 0,38  | 1,30  | 0,24319 | NM_006012       | DUSP5P    |
| 7910379 | -1,02 | -2,03 | 0,07291 | 0,46  | 1,38  | 0,03119 | NR_002834       | C19orf36  |
| 8024373 | -1,02 | -2,03 | 0,13209 | -0,56 | -1,48 | 0,06102 | NM_001039846    | ---       |
| 7965721 | -1,02 | -2,03 | 0,00644 | -0,86 | -1,81 | 0,03700 | ---             | C8orf74   |
| 8144577 | -1,02 | -2,03 | 0,05077 | -2,02 | -4,05 | 0,00293 | NM_001040032    | C1orf130  |
| 7898967 | -1,02 | -2,03 | 0,04809 | -0,31 | -1,24 | 0,57099 | NM_001010980    | EFCAB1    |
| 8150691 | -1,02 | -2,03 | 0,09368 | -0,57 | -1,48 | 0,02704 | NM_024593       | ---       |
| 8160256 | -1,02 | -2,03 | 0,02682 | -1,05 | -2,07 | 0,00114 | ---             | C11orf42  |
| 7938078 | -1,02 | -2,03 | 0,00721 | -1,70 | -3,25 | 0,03754 | NM_173525       | CDY1      |
| 8176671 | -1,02 | -2,03 | 0,07292 | -1,36 | -2,56 | 0,00314 | NM_170723       | AGBL1     |
| 7985741 | -1,02 | -2,03 | 0,00608 | -0,63 | -1,55 | 0,01167 | NM_152336       | FAM75A7   |
| 8161409 | -1,02 | -2,03 | 0,06022 | -1,70 | -3,25 | 0,00168 | NM_015667       | DDI1      |
| 7943521 | -1,02 | -2,03 | 0,06932 | -1,30 | -2,46 | 0,00145 | NM_001001711    | DNAJC4    |
| 7949058 | -1,02 | -2,03 | 0,00647 | -1,07 | -2,10 | 0,10087 | NM_005528       | ---       |
| 7899988 | -1,02 | -2,03 | 0,01063 | -0,66 | -1,58 | 0,00389 | ---             | RIMBP2    |
| 7967660 | -1,02 | -2,03 | 0,03590 | -0,67 | -1,59 | 0,23852 | NM_015347       | TMC3      |
| 7990848 | -1,02 | -2,03 | 0,01596 | -2,05 | -4,14 | 0,00195 | NM_001080532    | ---       |
| 7972661 | -1,02 | -2,03 | 0,06434 | -1,31 | -2,48 | 0,00679 | ---             | FLJ42102  |
| 7950064 | -1,02 | -2,03 | 0,06917 | -0,57 | -1,48 | 0,42625 | ENST00000331301 | ENPP7     |
| 8010313 | -1,02 | -2,03 | 0,05439 | -2,11 | -4,31 | 0,00167 | NM_178543       | GPC3      |
| 8175234 | -1,02 | -2,03 | 0,07063 | -1,07 | -2,10 | 0,12009 | NM_001164617    | LHFPL1    |
| 8174568 | -1,02 | -2,03 | 0,01989 | -1,36 | -2,56 | 0,05979 | NM_178175       | ---       |
| 8102948 | -1,02 | -2,03 | 0,07713 | -0,79 | -1,73 | 0,01815 | ---             | ---       |
| 8068662 | -1,02 | -2,03 | 0,00720 | -0,91 | -1,87 | 0,00336 | ---             | OSGIN1    |
| 7997533 | -1,02 | -2,03 | 0,10576 | -1,61 | -3,05 | 0,01832 | NM_013370       | MTMR8     |
| 8173245 | -1,02 | -2,03 | 0,16223 | 0,18  | 1,13  | 0,69796 | NM_017677       | ---       |
| 8020027 | -1,02 | -2,03 | 0,20143 | -1,36 | -2,58 | 0,00379 | ---             | ---       |
| 8080985 | -1,02 | -2,03 | 0,12461 | -1,33 | -2,52 | 0,00076 | ---             | SOX14     |
| 8082926 | -1,02 | -2,03 | 0,06383 | -1,53 | -2,89 | 0,00130 | NM_004189       | ---       |
| 7919852 | -1,02 | -2,03 | 0,30402 | -0,51 | -1,43 | 0,02207 | ---             | FAM22A    |
| 7928915 | -1,02 | -2,03 | 0,06192 | -0,81 | -1,75 | 0,07715 | NM_001099338    | ---       |
| 8123737 | -1,02 | -2,03 | 0,05020 | -0,97 | -1,96 | 0,08722 | ---             | ---       |
| 7948161 | -1,02 | -2,03 | 0,10994 | -1,68 | -3,20 | 0,00578 | ---             | EEFSEC    |
| 8082422 | -1,02 | -2,03 | 0,02562 | 0,62  | 1,54  | 0,09196 | NM_021937       | NAPSB     |
| 8038547 | -1,02 | -2,03 | 0,01019 | -0,90 | -1,87 | 0,05457 | NR_002798       | FAM186A   |
| 7963203 | -1,02 | -2,03 | 0,09026 | -1,47 | -2,77 | 0,01556 | NM_001145475    | STXBP2    |
| 8025255 | -1,02 | -2,03 | 0,04532 | 0,96  | 1,95  | 0,08713 | NM_006949       | SMO       |
| 8136080 | -1,02 | -2,03 | 0,08938 | -0,46 | -1,37 | 0,21307 | NM_005631       | ---       |
| 7983525 | -1,02 | -2,03 | 0,04249 | -0,35 | -1,27 | 0,27054 | ---             | ---       |
| 7974617 | -1,02 | -2,03 | 0,02167 | -0,72 | -1,64 | 0,00837 | ---             | SLC10A4   |
| 8094960 | -1,02 | -2,03 | 0,00049 | 0,04  | 1,03  | 0,92007 | NM_152679       | TG        |
| 8148385 | -1,02 | -2,03 | 0,00373 | -1,17 | -2,24 | 0,01821 | NM_003235       | SFRP5     |
| 7935528 | -1,02 | -2,03 | 0,15994 | -1,41 | -2,66 | 0,00139 | NM_003015       | ---       |
| 8036027 | -1,02 | -2,03 | 0,01723 | -0,70 | -1,62 | 0,16200 | ---             | ---       |
| 8005245 | -1,02 | -2,03 | 0,02025 | -1,42 | -2,67 | 0,00185 | ---             | DNAH6     |
| 8043059 | -1,02 | -2,03 | 0,00575 | -0,99 | -1,99 | 0,00266 | NM_001370       | MIR194-2  |
| 7949275 | -1,02 | -2,03 | 0,12499 | -0,99 | -1,99 | 0,07633 | NR_029829       | ---       |
| 8124181 | -1,02 | -2,03 | 0,01846 | -1,09 | -2,13 | 0,00560 | ---             | APOC4     |
| 8029547 | -1,02 | -2,03 | 0,07832 | -1,39 | -2,63 | 0,01565 | NM_001646       | SLA2      |
| 8066038 | -1,02 | -2,03 | 0,05950 | -0,98 | -1,98 | 0,00395 | NM_032214       | ---       |
| 7924497 | -1,02 | -2,03 | 0,02079 | -1,24 | -2,37 | 0,00867 | ---             | PCSK6     |
| 7991602 | -1,02 | -2,03 | 0,00621 | 1,31  | 2,47  | 0,00643 | NM_002570       | ---       |
| 8173611 | -1,02 | -2,03 | 0,00643 | -0,71 | -1,64 | 0,07022 | ---             | GALNTL4   |
| 7946641 | -1,02 | -2,03 | 0,03004 | -0,52 | -1,44 | 0,21603 | NM_198516       | ---       |
| 7976069 | -1,02 | -2,03 | 0,28994 | -0,77 | -1,70 | 0,02143 | ---             | TCP11     |
| 8125870 | -1,02 | -2,03 | 0,12098 | -1,51 | -2,84 | 0,00777 | NM_001093728    | ---       |
| 8032273 | -1,02 | -2,03 | 0,00165 | -0,95 | -1,93 | 0,02389 | ---             | ---       |
| 7906784 | -1,02 | -2,03 | 0,01526 | -1,01 | -2,01 | 0,00013 | ---             | CLDN3     |
| 8140140 | -1,02 | -2,03 | 0,19373 | 1,40  | 2,63  | 0,00269 | NM_001306       | RSPH10B   |
| 8131452 | -1,02 | -2,03 | 0,03704 | -0,57 | -1,49 | 0,12506 | NM_173565       | SPINT3    |
| 8066530 | -1,02 | -2,03 | 0,00682 | -1,15 | -2,21 | 0,02460 | NM_006652       | ---       |
| 8109591 | -1,02 | -2,03 | 0,11756 | -1,00 | -2,00 | 0,00594 | ---             | ---       |
| 8099539 | -1,02 | -2,03 | 0,15906 | -1,53 | -2,89 | 0,01046 | ---             | DGAT2L6   |

|         |       |       |         |       |       |         |                 |              |
|---------|-------|-------|---------|-------|-------|---------|-----------------|--------------|
| 8168098 | -1,02 | -2,03 | 0,00179 | -1,12 | -2,17 | 0,00276 | NM_198512       | C15orf56     |
| 7987472 | -1,02 | -2,03 | 0,13005 | -0,88 | -1,84 | 0,01200 | NM_001039905    | CSF2RB       |
| 8072757 | -1,02 | -2,03 | 0,04781 | -1,60 | -3,02 | 0,00034 | NM_000395       | LOC100132178 |
| 8031566 | -1,02 | -2,03 | 0,00700 | -1,06 | -2,08 | 0,03343 | ENST00000413847 | ---          |
| 7982388 | -1,02 | -2,03 | 0,00007 | -1,20 | -2,29 | 0,00875 | ---             | RGL4         |
| 8071717 | -1,02 | -2,03 | 0,02890 | -1,30 | -2,46 | 0,04532 | NM_153615       | KRT36        |
| 8015312 | -1,02 | -2,03 | 0,00010 | -1,18 | -2,27 | 0,00542 | NM_003771       | MIRLET7C     |
| 8067944 | -1,02 | -2,03 | 0,01835 | -1,44 | -2,72 | 0,00048 | NR_029480       | ---          |
| 7923177 | -1,03 | -2,04 | 0,00023 | -0,73 | -1,66 | 0,00744 | ---             | CCDC103      |
| 8007707 | -1,03 | -2,04 | 0,01966 | -0,37 | -1,29 | 0,28121 | NM_213607       | RPL22L1      |
| 8092067 | -1,03 | -2,04 | 0,14266 | -0,11 | -1,08 | 0,27163 | NM_001099645    | MDP1         |
| 7978192 | -1,03 | -2,04 | 0,00222 | -0,42 | -1,34 | 0,08208 | NM_138476       | NUDT16L1     |
| 7993019 | -1,03 | -2,04 | 0,00425 | -0,57 | -1,48 | 0,19539 | NM_032349       | PP13439      |
| 8092162 | -1,03 | -2,04 | 0,07155 | -1,93 | -3,82 | 0,00221 | ENST00000331659 | LOC157740    |
| 8149320 | -1,03 | -2,04 | 0,07747 | -0,83 | -1,78 | 0,07628 | AJ291676        | ---          |
| 7898294 | -1,03 | -2,04 | 0,13367 | -1,10 | -2,14 | 0,00467 | ---             | ---          |
| 8022340 | -1,03 | -2,04 | 0,03629 | -1,53 | -2,89 | 0,03213 | ---             | TSPAN18      |
| 7939559 | -1,03 | -2,04 | 0,11818 | 1,01  | 2,02  | 0,02729 | NM_130783       | CCDC57       |
| 8019437 | -1,03 | -2,04 | 0,00367 | -1,04 | -2,06 | 0,01967 | NM_198082       | MCM3APAS     |
| 8069332 | -1,03 | -2,04 | 0,01151 | -0,05 | -1,03 | 0,85737 | NR_002776       | KCNE1        |
| 8070173 | -1,03 | -2,04 | 0,18016 | -1,53 | -2,90 | 0,02717 | NM_000219       | FXYP4        |
| 7927155 | -1,03 | -2,04 | 0,02132 | -1,36 | -2,57 | 0,00568 | NM_173160       | SLC38A8      |
| 8003077 | -1,03 | -2,04 | 0,02268 | -2,20 | -4,59 | 0,00306 | NM_001080442    | CXCL9        |
| 8101118 | -1,03 | -2,04 | 0,05882 | -1,18 | -2,26 | 0,01268 | NM_002416       | ATHL1        |
| 7937314 | -1,03 | -2,04 | 0,00904 | 0,02  | 1,01  | 0,96980 | NM_025092       | HTR1F        |
| 8081067 | -1,03 | -2,04 | 0,01523 | -1,11 | -2,16 | 0,01291 | NM_000866       | ---          |
| 8152115 | -1,03 | -2,04 | 0,03627 | -1,19 | -2,28 | 0,00009 | ---             | TBPL2        |
| 7979341 | -1,03 | -2,04 | 0,21465 | -1,36 | -2,57 | 0,00314 | NM_199047       | ---          |
| 7920256 | -1,03 | -2,04 | 0,06371 | -1,13 | -2,20 | 0,15274 | ---             | FAM167A      |
| 8149324 | -1,03 | -2,04 | 0,04714 | 0,19  | 1,14  | 0,55692 | NM_053279       | PACS2        |
| 7977371 | -1,03 | -2,04 | 0,06964 | -1,22 | -2,34 | 0,04831 | NM_001100913    | ---          |
| 8008704 | -1,03 | -2,04 | 0,07275 | -2,14 | -4,42 | 0,00275 | ---             | ---          |
| 7955132 | -1,03 | -2,04 | 0,07000 | -1,36 | -2,56 | 0,01042 | ---             | CHCHD4       |
| 8085481 | -1,03 | -2,04 | 0,02984 | -0,49 | -1,40 | 0,22815 | NM_144636       | PHACTR3      |
| 8063739 | -1,03 | -2,04 | 0,07458 | -0,77 | -1,70 | 0,00759 | NM_080672       | ---          |
| 8113035 | -1,03 | -2,04 | 0,04508 | -0,33 | -1,26 | 0,03202 | ---             | HAUS7        |
| 8175782 | -1,03 | -2,04 | 0,04748 | -0,40 | -1,32 | 0,13567 | NM_017518       | KLKB1        |
| 8098654 | -1,03 | -2,04 | 0,03665 | -0,78 | -1,72 | 0,07563 | NM_000892       | GRAP         |
| 8013319 | -1,03 | -2,04 | 0,01688 | -1,81 | -3,50 | 0,01912 | NM_006613       | DNAI2        |
| 8009585 | -1,03 | -2,04 | 0,05481 | -1,13 | -2,19 | 0,04781 | NM_023036       | GPR87        |
| 8091515 | -1,03 | -2,04 | 0,04319 | 0,30  | 1,23  | 0,50663 | NM_023915       | C11orf84     |
| 7940790 | -1,03 | -2,04 | 0,09703 | 1,00  | 2,00  | 0,11228 | BC056402        | INCENP       |
| 7940600 | -1,03 | -2,04 | 0,00414 | 0,15  | 1,11  | 0,40984 | NM_001040694    | ---          |
| 7942326 | -1,03 | -2,04 | 0,05563 | -1,25 | -2,38 | 0,00820 | ---             | SLC23A3      |
| 8059081 | -1,03 | -2,04 | 0,00141 | -0,89 | -1,86 | 0,00563 | NM_001144889    | ---          |
| 8065321 | -1,03 | -2,04 | 0,05782 | -0,97 | -1,96 | 0,09227 | ---             | PHLDA2       |
| 7945781 | -1,03 | -2,04 | 0,01177 | -0,57 | -1,48 | 0,06649 | NM_003311       | ---          |
| 8051862 | -1,03 | -2,04 | 0,02663 | -0,76 | -1,69 | 0,00050 | ---             | PABPC1L      |
| 8062890 | -1,03 | -2,04 | 0,06122 | 2,12  | 4,34  | 0,00116 | NM_001124756    | STK38        |
| 8119076 | -1,03 | -2,04 | 0,14366 | -0,29 | -1,22 | 0,49993 | NM_007271       | PNMA3        |
| 8170622 | -1,03 | -2,04 | 0,03266 | -1,67 | -3,19 | 0,03000 | NM_013364       | ---          |
| 8088998 | -1,03 | -2,04 | 0,03494 | -0,79 | -1,73 | 0,02119 | ---             | ---          |
| 8105629 | -1,03 | -2,04 | 0,09160 | -1,28 | -2,43 | 0,02448 | ---             | CCL13        |
| 8006459 | -1,03 | -2,04 | 0,01314 | -0,77 | -1,70 | 0,03929 | NM_005408       | ST6GAL2      |
| 8054439 | -1,03 | -2,04 | 0,12392 | -0,95 | -1,93 | 0,01827 | NM_032528       | LOC441242    |
| 8139845 | -1,03 | -2,04 | 0,20409 | -1,56 | -2,94 | 0,04536 | ENST00000439845 | ---          |
| 8150489 | -1,03 | -2,04 | 0,03352 | -0,76 | -1,70 | 0,02419 | ---             | DEFB116      |
| 8065552 | -1,03 | -2,04 | 0,03422 | -1,52 | -2,88 | 0,00447 | NM_001037731    | LOC401010    |
| 8055281 | -1,03 | -2,04 | 0,27478 | -0,63 | -1,55 | 0,23925 | NR_002826       | ---          |
| 8157018 | -1,03 | -2,04 | 0,14948 | -1,10 | -2,14 | 0,01367 | ---             | MAEL         |
| 7907032 | -1,03 | -2,04 | 0,00139 | -0,74 | -1,67 | 0,00364 | NM_032858       | ---          |
| 7965429 | -1,03 | -2,04 | 0,39567 | -0,67 | -1,59 | 0,09459 | ---             | KLC3         |
| 8029671 | -1,03 | -2,04 | 0,02763 | -1,60 | -3,03 | 0,00006 | NM_177417       | ---          |
| 8148156 | -1,03 | -2,04 | 0,10570 | -1,74 | -3,35 | 0,01462 | ---             | ---          |
| 8088828 | -1,03 | -2,04 | 0,02119 | -0,99 | -1,98 | 0,03432 | ---             | VIPR1        |
| 8079060 | -1,03 | -2,04 | 0,02765 | -0,91 | -1,87 | 0,06695 | NM_004624       | SNORD115-10  |
| 7982026 | -1,03 | -2,04 | 0,01544 | -0,92 | -1,89 | 0,09197 | NR_003302       | FAM25B       |
| 7927363 | -1,03 | -2,04 | 0,25678 | -1,78 | -3,45 | 0,04140 | NM_001137556    | FAM25B       |
| 7933327 | -1,03 | -2,04 | 0,25678 | -1,78 | -3,45 | 0,04140 | NM_001137556    | FAM25B       |
| 7933423 | -1,03 | -2,04 | 0,25678 | -1,78 | -3,45 | 0,04140 | NM_001137556    | ---          |
| 7916880 | -1,03 | -2,04 | 0,01195 | -1,14 | -2,20 | 0,00619 | ---             | PXN          |
| 7967021 | -1,03 | -2,04 | 0,08003 | -0,53 | -1,44 | 0,38315 | BC052611        | FAM193B      |
| 8116113 | -1,03 | -2,04 | 0,11846 | -0,76 | -1,69 | 0,13102 | NR_024019       | ---          |

|         |       |       |         |       |       |         |                 |         |             |
|---------|-------|-------|---------|-------|-------|---------|-----------------|---------|-------------|
| 8075505 | -1,03 | -2,04 | 0,05875 | -2,02 | -4,05 | 0,00883 | ---             | B3GNT4  |             |
| 7959402 | -1,03 | -2,04 | 0,02790 | -0,42 | -1,34 | 0,19198 | NM_030765       |         | SNORD115-31 |
| 7982068 | -1,03 | -2,04 | 0,04001 | -0,89 | -1,85 | 0,03387 | NR_003346       |         | BBF1        |
| 8018522 | -1,03 | -2,04 | 0,00758 | -0,26 | -1,20 | 0,08802 | NM_001080542    |         | RBMY1B      |
| 8177303 | -1,03 | -2,04 | 0,01650 | -1,19 | -2,28 | 0,00459 | NM_001006121    |         | C14orf19    |
| 7973900 | -1,03 | -2,04 | 0,08514 | 0,54  | 1,46  | 0,15921 | NR_002937       |         | NEUROG2     |
| 8102368 | -1,03 | -2,04 | 0,00991 | -0,16 | -1,12 | 0,55659 | NM_024019       |         | BTNL3       |
| 8110620 | -1,03 | -2,04 | 0,02040 | -0,94 | -1,92 | 0,02490 | NM_197975       |         | ---         |
| 7970922 | -1,03 | -2,04 | 0,09254 | -1,49 | -2,80 | 0,00089 | ---             | IGK@    |             |
| 8043449 | -1,03 | -2,04 | 0,18404 | -1,19 | -2,29 | 0,02351 | BC030813        | ---     |             |
| 8123889 | -1,03 | -2,04 | 0,00339 | -0,87 | -1,83 | 0,00389 | ---             | ---     |             |
| 7939934 | -1,03 | -2,04 | 0,03514 | -1,77 | -3,42 | 0,00005 | ---             | SLC24A2 |             |
| 8160321 | -1,03 | -2,04 | 0,03195 | -1,11 | -2,16 | 0,00331 | NM_020344       |         | PCNXL3      |
| 7941350 | -1,03 | -2,04 | 0,00591 | 1,36  | 2,57  | 0,02494 | NM_032223       |         | ---         |
| 7962893 | -1,03 | -2,04 | 0,65761 | -0,22 | -1,16 | 0,46472 | ---             | DYSFIP1 |             |
| 8019243 | -1,03 | -2,04 | 0,05578 | -1,55 | -2,93 | 0,00127 | NM_001007533    |         | PGA3        |
| 7940421 | -1,03 | -2,04 | 0,25886 | -1,76 | -3,39 | 0,02944 | NM_001079807    |         | ---         |
| 8144042 | -1,03 | -2,04 | 0,38775 | -0,98 | -1,97 | 0,08004 | ---             | VPS72   |             |
| 7919940 | -1,03 | -2,04 | 0,17040 | 2,56  | 5,88  | 0,00890 | NM_005997       |         | FCAR        |
| 8031374 | -1,03 | -2,04 | 0,03087 | -1,61 | -3,05 | 0,00273 | NM_002000       |         | CHST8       |
| 8027574 | -1,03 | -2,04 | 0,01017 | -1,11 | -2,16 | 0,04271 | NM_022467       |         | ---         |
| 8124446 | -1,03 | -2,04 | 0,06513 | -0,36 | -1,29 | 0,11642 | ---             | MIR429  |             |
| 7896863 | -1,03 | -2,04 | 0,06267 | -1,22 | -2,33 | 0,02197 | NR_029957       |         | ---         |
| 8143268 | -1,03 | -2,04 | 0,04536 | -1,03 | -2,04 | 0,00005 | ---             | RPH3AL  |             |
| 8010903 | -1,03 | -2,04 | 0,10925 | -0,43 | -1,35 | 0,33519 | NM_006987       |         | POLD1       |
| 8030641 | -1,03 | -2,04 | 0,02945 | 0,12  | 1,09  | 0,80369 | NM_002691       |         | ---         |
| 8122885 | -1,03 | -2,04 | 0,07791 | -1,65 | -3,15 | 0,00661 | ---             | FES     |             |
| 7986110 | -1,03 | -2,04 | 0,02039 | -0,73 | -1,65 | 0,00431 | NM_002005       |         | ---         |
| 8114352 | -1,03 | -2,04 | 0,01705 | -0,73 | -1,66 | 0,00380 | ---             | PTCHD2  |             |
| 7897691 | -1,03 | -2,04 | 0,03243 | -1,43 | -2,70 | 0,11206 | NM_020780       |         | TMEM17      |
| 8052585 | -1,03 | -2,05 | 0,05007 | 1,29  | 2,45  | 0,00113 | NM_198276       |         | TRPM5       |
| 7945742 | -1,03 | -2,05 | 0,02708 | -0,70 | -1,62 | 0,04093 | NM_014555       |         | SLC24A3     |
| 8061227 | -1,03 | -2,05 | 0,00325 | -1,47 | -2,78 | 0,00561 | NM_020689       |         | MTPP        |
| 8096580 | -1,03 | -2,05 | 0,01125 | -0,93 | -1,90 | 0,00352 | NM_000253       |         | LOC641367   |
| 8027320 | -1,03 | -2,05 | 0,01276 | -1,14 | -2,20 | 0,01704 | NR_024523       |         | ANKRD7      |
| 8135697 | -1,03 | -2,05 | 0,05994 | -1,02 | -2,03 | 0,01562 | NM_019644       |         | ---         |
| 8055666 | -1,03 | -2,05 | 0,00080 | -0,82 | -1,77 | 0,07824 | ---             | ---     |             |
| 7919049 | -1,03 | -2,05 | 0,00499 | -1,31 | -2,49 | 0,00038 | ---             | ---     |             |
| 8093110 | -1,03 | -2,05 | 0,07958 | -1,02 | -2,03 | 0,00009 | ---             | ---     |             |
| 7963739 | -1,03 | -2,05 | 0,05001 | -2,82 | -7,06 | 0,00130 | ---             | FAM3D   |             |
| 8088425 | -1,03 | -2,05 | 0,05198 | -1,72 | -3,30 | 0,00662 | NM_138805       |         | TMEM78      |
| 7910396 | -1,03 | -2,05 | 0,05743 | -1,41 | -2,66 | 0,00293 | ENST00000323223 |         | OR2M1P      |
| 7911260 | -1,03 | -2,05 | 0,44285 | -2,37 | -5,17 | 0,05640 | NR_002141       |         | CGREF1      |
| 8051001 | -1,03 | -2,05 | 0,00038 | 1,11  | 2,16  | 0,08801 | NM_006569       |         | SNORA70G    |
| 7964830 | -1,03 | -2,05 | 0,10731 | -0,43 | -1,35 | 0,00220 | NR_033335       |         | GAD1        |
| 8046283 | -1,03 | -2,05 | 0,01093 | -0,17 | -1,13 | 0,47440 | NM_000817       |         | C6orf132    |
| 8126379 | -1,03 | -2,05 | 0,00870 | -0,95 | -1,93 | 0,03776 | NM_001164446    |         | ---         |
| 7969426 | -1,03 | -2,05 | 0,00009 | -1,45 | -2,72 | 0,05070 | ---             | ---     |             |
| 8116952 | -1,03 | -2,05 | 0,35576 | -2,65 | -6,26 | 0,00101 | ---             | PNMA2   |             |
| 8149877 | -1,03 | -2,05 | 0,03373 | -0,25 | -1,19 | 0,59305 | NM_007257       |         | CABP5       |
| 8037962 | -1,03 | -2,05 | 0,16392 | -0,80 | -1,75 | 0,13509 | NM_019855       |         | ---         |
| 8116295 | -1,03 | -2,05 | 0,05970 | -1,36 | -2,56 | 0,02747 | ---             | LAIR2   |             |
| 8031196 | -1,03 | -2,05 | 0,11273 | -1,43 | -2,70 | 0,00063 | NM_002288       |         | C12orf74    |
| 7957510 | -1,03 | -2,05 | 0,02362 | -1,87 | -3,65 | 0,05927 | BC107813        |         | NCRNA00083  |
| 7922590 | -1,03 | -2,05 | 0,03150 | -1,98 | -3,94 | 0,01034 | AK125993        |         | BATF3       |
| 7924166 | -1,03 | -2,05 | 0,07012 | -0,48 | -1,39 | 0,21081 | NM_018664       |         | CCDC106     |
| 8031526 | -1,03 | -2,05 | 0,03394 | -0,05 | -1,04 | 0,88649 | NM_013301       |         | CTBP2       |
| 7936904 | -1,03 | -2,05 | 0,07141 | 0,07  | 1,05  | 0,77033 | NM_022802       |         | CHMP4A      |
| 7978187 | -1,04 | -2,05 | 0,00660 | -0,78 | -1,71 | 0,05455 | NM_014169       |         | ---         |
| 7942809 | -1,04 | -2,05 | 0,06208 | -0,25 | -1,19 | 0,27234 | ---             | GRM1    |             |
| 8122537 | -1,04 | -2,05 | 0,00428 | -1,47 | -2,78 | 0,04018 | NM_001114329    |         | SGK494      |
| 8013622 | -1,04 | -2,05 | 0,14100 | 1,02  | 2,03  | 0,02563 | NM_001174103    |         | ---         |
| 8175151 | -1,04 | -2,05 | 0,06138 | -0,95 | -1,93 | 0,17432 | ---             | PEX16   |             |
| 7947609 | -1,04 | -2,05 | 0,03232 | -1,33 | -2,52 | 0,00995 | NM_004813       |         | HHLA1       |
| 8152938 | -1,04 | -2,05 | 0,07835 | -1,40 | -2,64 | 0,00119 | NM_001145095    |         | ---         |
| 7937936 | -1,04 | -2,05 | 0,01500 | -1,73 | -3,32 | 0,06293 | ---             | FOXD4L2 |             |
| 8155440 | -1,04 | -2,05 | 0,12544 | -1,26 | -2,39 | 0,03493 | NM_001099279    |         | FOXD4L2     |
| 8161583 | -1,04 | -2,05 | 0,12544 | -1,26 | -2,39 | 0,03493 | NM_001099279    |         | ROBO4       |
| 7952453 | -1,04 | -2,05 | 0,04064 | -1,76 | -3,38 | 0,00960 | NM_019055       |         | RUSC1       |
| 7905999 | -1,04 | -2,05 | 0,06755 | 0,08  | 1,06  | 0,90536 | NM_001105203    |         | ---         |
| 8105583 | -1,04 | -2,05 | 0,00080 | -1,44 | -2,72 | 0,02220 | ---             | ---     |             |
| 8158057 | -1,04 | -2,05 | 0,06008 | -1,73 | -3,31 | 0,02197 | ---             | RFPL4B  |             |
| 8121553 | -1,04 | -2,05 | 0,00150 | -0,72 | -1,64 | 0,01564 | NM_001013734    |         | ---         |



|         |       |       |         |       |       |         |                 |          |              |
|---------|-------|-------|---------|-------|-------|---------|-----------------|----------|--------------|
| 8117739 | -1,04 | -2,05 | 0,04400 | -1,79 | -3,46 | 0,00004 | ---             | HCRTTR1  |              |
| 7899643 | -1,04 | -2,05 | 0,03617 | -1,85 | -3,60 | 0,03337 | NM_001525       |          | LOC100132167 |
| 8155516 | -1,04 | -2,05 | 0,03209 | -0,96 | -1,95 | 0,08366 | BC006438        | OR7E125P |              |
| 8149208 | -1,04 | -2,05 | 0,50883 | -3,16 | -8,95 | 0,00002 | ENST00000420198 |          | ZNRF1        |
| 7997247 | -1,04 | -2,05 | 0,00748 | 0,02  | 1,01  | 0,96655 | NM_032268       |          | PRSS55       |
| 8144571 | -1,04 | -2,05 | 0,03520 | -1,19 | -2,28 | 0,00106 | NM_198464       |          | ---          |
| 8005397 | -1,04 | -2,05 | 0,07045 | -1,15 | -2,22 | 0,01099 | ---             | ---      |              |
| 8115675 | -1,04 | -2,05 | 0,00209 | -0,96 | -1,95 | 0,05442 | ---             | TMPRSS15 |              |
| 8069582 | -1,04 | -2,05 | 0,00042 | -1,18 | -2,27 | 0,04998 | NM_002772       |          | GPR15        |
| 8081214 | -1,04 | -2,05 | 0,12264 | -1,20 | -2,29 | 0,00027 | NM_005290       |          | ---          |
| 8157101 | -1,04 | -2,05 | 0,06445 | -2,31 | -4,97 | 0,01874 | ---             | CXorf36  |              |
| 8172254 | -1,04 | -2,05 | 0,00691 | -1,18 | -2,27 | 0,00022 | NM_176819       |          | HPDL         |
| 7901087 | -1,04 | -2,05 | 0,13325 | -0,11 | -1,08 | 0,76587 | NM_032756       |          | KIR3DL1      |
| 8031311 | -1,04 | -2,05 | 0,12015 | -1,63 | -3,10 | 0,00521 | NM_013289       |          | CTNNA2       |
| 8042993 | -1,04 | -2,05 | 0,02879 | -1,35 | -2,54 | 0,00847 | NM_004389       |          | TPPP         |
| 8110708 | -1,04 | -2,05 | 0,06840 | -1,47 | -2,76 | 0,00331 | NM_007030       |          | OR4K5        |
| 7973014 | -1,04 | -2,05 | 0,05022 | -1,00 | -2,00 | 0,02325 | NM_001005483    |          | ---          |
| 8017619 | -1,04 | -2,05 | 0,01320 | -1,11 | -2,15 | 0,01599 | ---             | ---      |              |
| 8117720 | -1,04 | -2,05 | 0,17303 | -2,06 | -4,17 | 0,01093 | ---             | CCT8L1   |              |
| 8137468 | -1,04 | -2,05 | 0,00370 | -0,74 | -1,67 | 0,05491 | ENST00000021776 |          | SEMA6B       |
| 8032839 | -1,04 | -2,05 | 0,04782 | 0,23  | 1,18  | 0,59656 | NM_032108       |          | CEACAM21     |
| 8037043 | -1,04 | -2,05 | 0,14199 | -1,77 | -3,41 | 0,00157 | AK023602        | ---      |              |
| 7969563 | -1,04 | -2,05 | 0,03938 | -1,18 | -2,26 | 0,00470 | ---             | MAGEA4   |              |
| 8170531 | -1,04 | -2,05 | 0,14704 | -1,30 | -2,46 | 0,00575 | NM_001011548    |          | ---          |
| 8080683 | -1,04 | -2,05 | 0,03863 | -1,34 | -2,52 | 0,03780 | ---             | OR111    |              |
| 8026405 | -1,04 | -2,05 | 0,04993 | -1,84 | -3,58 | 0,00202 | NM_001004713    |          | SDR16C5      |
| 8150889 | -1,04 | -2,05 | 0,00133 | -0,03 | -1,02 | 0,45741 | NM_138969       |          | ---          |
| 7950862 | -1,04 | -2,05 | 0,28041 | -0,96 | -1,95 | 0,00362 | ---             | MAGEL2   |              |
| 7986755 | -1,04 | -2,05 | 0,03928 | -2,27 | -4,82 | 0,00342 | NM_019066       |          | FAM115C      |
| 8136954 | -1,04 | -2,05 | 0,02331 | -1,17 | -2,26 | 0,00127 | NM_001130026    |          | ---          |
| 8121223 | -1,04 | -2,05 | 0,00065 | -0,98 | -1,97 | 0,02791 | ---             | ---      |              |
| 8121255 | -1,04 | -2,05 | 0,01000 | -1,01 | -2,01 | 0,03567 | ---             | HOXB4    |              |
| 8016452 | -1,04 | -2,05 | 0,05159 | -1,31 | -2,47 | 0,00010 | NM_024015       |          | PHOX2B       |
| 8100007 | -1,04 | -2,05 | 0,04008 | -0,36 | -1,28 | 0,17279 | NM_003924       |          | GAL3ST3      |
| 7949570 | -1,04 | -2,05 | 0,07571 | -1,79 | -3,47 | 0,01864 | NM_033036       |          | P2RX2        |
| 7960099 | -1,04 | -2,06 | 0,01404 | -1,60 | -3,03 | 0,01983 | NM_170683       |          | ECHDC3       |
| 7926152 | -1,04 | -2,06 | 0,06543 | 0,75  | 1,68  | 0,22706 | NM_024693       |          | ---          |
| 7999023 | -1,04 | -2,06 | 0,00290 | -1,47 | -2,76 | 0,01118 | ---             | C5orf27  |              |
| 8106999 | -1,04 | -2,06 | 0,01416 | -1,18 | -2,26 | 0,00981 | NR_026936       |          | OR2T3        |
| 7911283 | -1,04 | -2,06 | 0,37231 | -2,00 | -4,01 | 0,04901 | NM_001005495    |          | ---          |
| 7916841 | -1,04 | -2,06 | 0,09682 | -1,11 | -2,16 | 0,00594 | ---             | MAG      |              |
| 8027824 | -1,04 | -2,06 | 0,01754 | -1,96 | -3,88 | 0,00031 | NM_080600       |          | ---          |
| 8003800 | -1,04 | -2,06 | 0,07216 | -1,12 | -2,17 | 0,02805 | ---             | OR2F2    |              |
| 8136961 | -1,04 | -2,06 | 0,12174 | -1,60 | -3,03 | 0,00396 | NM_001004685    |          | C9orf172     |
| 8159439 | -1,04 | -2,06 | 0,05753 | -0,86 | -1,81 | 0,10796 | NM_001080482    |          | ---          |
| 8044764 | -1,04 | -2,06 | 0,01444 | -1,34 | -2,53 | 0,05106 | ---             | FLJ44881 |              |
| 8021777 | -1,04 | -2,06 | 0,14645 | -1,52 | -2,87 | 0,08075 | BC119776        | HECA     |              |
| 8122343 | -1,04 | -2,06 | 0,09991 | 0,64  | 1,55  | 0,06318 | NM_016217       |          | HAND2        |
| 8103745 | -1,04 | -2,06 | 0,08541 | -1,51 | -2,85 | 0,00025 | NM_021973       |          | XAGE1A       |
| 8167701 | -1,04 | -2,06 | 0,09588 | 2,00  | 4,00  | 0,00040 | NR_033253       |          | XAGE1A       |
| 8167710 | -1,04 | -2,06 | 0,09588 | 2,00  | 4,00  | 0,00040 | NR_033253       |          | XAGE1A       |
| 8172739 | -1,04 | -2,06 | 0,09588 | 2,00  | 4,00  | 0,00040 | NR_033253       |          | XAGE1A       |
| 8172757 | -1,04 | -2,06 | 0,09588 | 2,00  | 4,00  | 0,00040 | NR_033253       |          | XAGE1A       |
| 8172766 | -1,04 | -2,06 | 0,09588 | 2,00  | 4,00  | 0,00040 | NR_033253       |          | MYOZ1        |
| 7934434 | -1,04 | -2,06 | 0,02280 | -1,08 | -2,11 | 0,00039 | NM_021245       |          | ---          |
| 8101427 | -1,04 | -2,06 | 0,06593 | -0,93 | -1,91 | 0,00091 | ---             | JAKMIP3  |              |
| 7931417 | -1,04 | -2,06 | 0,02616 | -0,37 | -1,29 | 0,07450 | NM_001105521    |          | ---          |
| 7999886 | -1,04 | -2,06 | 0,11753 | -0,60 | -1,52 | 0,20897 | ---             | ---      |              |
| 8042062 | -1,04 | -2,06 | 0,03798 | -1,73 | -3,33 | 0,02704 | ---             | GPR173   |              |
| 8167758 | -1,04 | -2,06 | 0,01481 | -0,81 | -1,75 | 0,02535 | NM_018969       |          | OPN5         |
| 8120151 | -1,04 | -2,06 | 0,00309 | -1,49 | -2,80 | 0,01963 | NM_181744       |          | AWAT2        |
| 8173349 | -1,04 | -2,06 | 0,01578 | -1,41 | -2,65 | 0,02399 | NM_001002254    |          | ---          |
| 8171537 | -1,04 | -2,06 | 0,00663 | -1,48 | -2,79 | 0,03559 | ---             | ---      |              |
| 8156748 | -1,04 | -2,06 | 0,23529 | -2,46 | -5,49 | 0,00121 | ---             | ---      |              |
| 7923005 | -1,04 | -2,06 | 0,01187 | -1,64 | -3,12 | 0,00016 | ---             | LSM10    |              |
| 7914917 | -1,04 | -2,06 | 0,07797 | 0,07  | 1,05  | 0,79265 | NM_032881       |          | RHOH         |
| 8094743 | -1,04 | -2,06 | 0,01237 | -0,59 | -1,50 | 0,08581 | NM_004310       |          | ---          |
| 8024304 | -1,04 | -2,06 | 0,07968 | -0,72 | -1,65 | 0,15297 | ---             | ---      |              |
| 8104117 | -1,04 | -2,06 | 0,00942 | -1,10 | -2,14 | 0,00722 | ---             | ---      |              |
| 7948117 | -1,04 | -2,06 | 0,35779 | -1,21 | -2,31 | 0,01003 | ---             | CXorf64  |              |
| 8169808 | -1,04 | -2,06 | 0,06689 | -1,52 | -2,87 | 0,03695 | NM_001122716    |          | FLJ23865     |
| 8076193 | -1,04 | -2,06 | 0,08911 | -1,04 | -2,06 | 0,05193 | AK074445        | ---      |              |
| 8098101 | -1,04 | -2,06 | 0,00690 | -1,87 | -3,64 | 0,01597 | ---             | ---      |              |

|         |       |       |         |       |       |         |                 |              |  |
|---------|-------|-------|---------|-------|-------|---------|-----------------|--------------|--|
| 8081339 | -1,04 | -2,06 | 0,02894 | -1,88 | -3,67 | 0,00831 | ---             | UNC93B1      |  |
| 7949904 | -1,04 | -2,06 | 0,16038 | 1,54  | 2,90  | 0,01885 | NM_030930       | GPR113       |  |
| 8050924 | -1,04 | -2,06 | 0,01547 | -1,31 | -2,48 | 0,00803 | NM_001145168    | PPEF2        |  |
| 8101065 | -1,04 | -2,06 | 0,02365 | -1,07 | -2,10 | 0,00318 | NM_006239       | CNGB3        |  |
| 8151659 | -1,04 | -2,06 | 0,01771 | -1,23 | -2,34 | 0,00394 | NM_019098       | ---          |  |
| 7933145 | -1,04 | -2,06 | 0,01228 | -0,99 | -1,98 | 0,02786 | ---             | FOXB1        |  |
| 7984011 | -1,04 | -2,06 | 0,05220 | -1,54 | -2,91 | 0,00523 | NM_012182       | LOC100129484 |  |
| 8137962 | -1,04 | -2,06 | 0,11481 | -0,98 | -1,97 | 0,14277 | AK125308        | SHROOM3      |  |
| 8095834 | -1,04 | -2,06 | 0,05897 | 0,53  | 1,44  | 0,02476 | NM_020859       | TMEM155      |  |
| 8097126 | -1,04 | -2,06 | 0,00081 | -0,31 | -1,24 | 0,42041 | NM_152399       | WASH7P       |  |
| 7911309 | -1,04 | -2,06 | 0,05192 | -0,19 | -1,14 | 0,52039 | NR_024540       | ---          |  |
| 8048024 | -1,04 | -2,06 | 0,00051 | -1,47 | -2,77 | 0,04688 | ---             | LOC641515    |  |
| 7908863 | -1,04 | -2,06 | 0,03858 | -1,50 | -2,82 | 0,00020 | BC032956        | CSF3R        |  |
| 7914950 | -1,04 | -2,06 | 0,00140 | -1,23 | -2,34 | 0,06953 | NM_156039       | ---          |  |
| 8040428 | -1,04 | -2,06 | 0,04052 | -0,67 | -1,59 | 0,01057 | ---             | CCDC122      |  |
| 7971335 | -1,04 | -2,06 | 0,07534 | -0,22 | -1,17 | 0,55605 | NM_144974       | ---          |  |
| 7916745 | -1,04 | -2,06 | 0,00022 | -1,07 | -2,10 | 0,00060 | ---             | CIB4         |  |
| 8050993 | -1,04 | -2,06 | 0,04929 | -0,76 | -1,70 | 0,01333 | NM_001029881    | CHRNA        |  |
| 8049166 | -1,04 | -2,06 | 0,19687 | -1,55 | -2,93 | 0,00602 | NM_005199       | ---          |  |
| 7944359 | -1,04 | -2,06 | 0,00013 | -0,82 | -1,77 | 0,12024 | ---             | FCER2        |  |
| 8033420 | -1,04 | -2,06 | 0,02848 | -1,44 | -2,72 | 0,00594 | NM_002002       | KRT73        |  |
| 7963471 | -1,04 | -2,06 | 0,00956 | -1,44 | -2,72 | 0,00017 | NM_175068       | ---          |  |
| 8020088 | -1,04 | -2,06 | 0,01628 | -1,33 | -2,52 | 0,03793 | ---             | ---          |  |
| 7944601 | -1,04 | -2,06 | 0,09410 | -1,03 | -2,05 | 0,10601 | ---             | ---          |  |
| 8086075 | -1,04 | -2,06 | 0,04841 | -1,06 | -2,08 | 0,01061 | ---             | ---          |  |
| 8131512 | -1,04 | -2,06 | 0,24148 | -0,48 | -1,40 | 0,39091 | ---             | ANKDD1B      |  |
| 8106325 | -1,04 | -2,06 | 0,00833 | -0,15 | -1,11 | 0,27630 | ENST00000344149 | ---          |  |
| 8080674 | -1,04 | -2,06 | 0,09680 | -0,46 | -1,38 | 0,00751 | ---             | ASPG         |  |
| 7977203 | -1,04 | -2,06 | 0,03204 | -1,04 | -2,06 | 0,03177 | NM_001080464    | PKP1         |  |
| 7908672 | -1,04 | -2,06 | 0,10104 | -1,45 | -2,72 | 0,00321 | NM_000299       | NLGN4X       |  |
| 8171205 | -1,04 | -2,06 | 0,04150 | -0,76 | -1,69 | 0,01405 | NM_020742       | ---          |  |
| 8022247 | -1,04 | -2,06 | 0,02728 | -1,26 | -2,40 | 0,01342 | ---             | ---          |  |
| 8127509 | -1,04 | -2,06 | 0,01243 | -1,51 | -2,85 | 0,02007 | ---             | EDAR         |  |
| 8054451 | -1,04 | -2,06 | 0,10290 | -1,61 | -3,06 | 0,00014 | NM_022336       | C9orf100     |  |
| 8161026 | -1,04 | -2,06 | 0,01169 | 1,20  | 2,30  | 0,00119 | NM_032818       | ZNF169       |  |
| 8156529 | -1,04 | -2,06 | 0,04073 | -0,69 | -1,62 | 0,21134 | NM_194320       | FAM99A       |  |
| 7937707 | -1,04 | -2,06 | 0,18387 | -1,70 | -3,25 | 0,15580 | NR_026643       | ASCL1        |  |
| 7958051 | -1,04 | -2,06 | 0,17576 | -0,78 | -1,71 | 0,05153 | NM_004316       | ---          |  |
| 7972001 | -1,04 | -2,06 | 0,02398 | -1,01 | -2,02 | 0,00000 | ---             | STARD9       |  |
| 7983132 | -1,04 | -2,06 | 0,02342 | -0,30 | -1,23 | 0,34574 | NM_020759       | ---          |  |
| 8077768 | -1,05 | -2,06 | 0,10785 | -0,73 | -1,66 | 0,01291 | ---             | KRTAP27-1    |  |
| 8069808 | -1,05 | -2,06 | 0,03147 | -0,68 | -1,60 | 0,22208 | NM_001077711    | ---          |  |
| 7929332 | -1,05 | -2,06 | 0,12721 | -1,83 | -3,56 | 0,05885 | ---             | ---          |  |
| 7931975 | -1,05 | -2,06 | 0,01074 | -1,43 | -2,69 | 0,02859 | ---             | CA4          |  |
| 8008900 | -1,05 | -2,06 | 0,07001 | -1,37 | -2,58 | 0,00095 | NM_000717       | ---          |  |
| 8176669 | -1,05 | -2,06 | 0,01893 | -2,04 | -4,11 | 0,00737 | ---             | ---          |  |
| 8177189 | -1,05 | -2,06 | 0,01893 | -2,04 | -4,11 | 0,00737 | ---             | ---          |  |
| 8123642 | -1,05 | -2,06 | 0,13866 | -1,59 | -3,02 | 0,00195 | ---             | POLM         |  |
| 8139281 | -1,05 | -2,06 | 0,03135 | -0,19 | -1,14 | 0,64738 | NM_013284       | ---          |  |
| 8095037 | -1,05 | -2,06 | 0,05910 | -1,34 | -2,53 | 0,00418 | ---             | ---          |  |
| 8130783 | -1,05 | -2,06 | 0,10367 | -1,09 | -2,12 | 0,01823 | ---             | ARG1         |  |
| 8122058 | -1,05 | -2,06 | 0,05926 | -1,06 | -2,08 | 0,00395 | NM_000045       | ---          |  |
| 8044909 | -1,05 | -2,06 | 0,00778 | -0,89 | -1,85 | 0,00483 | ---             | ABCB5        |  |
| 8131682 | -1,05 | -2,07 | 0,04457 | -0,86 | -1,81 | 0,05303 | NM_178559       | SIRPB2       |  |
| 8064451 | -1,05 | -2,07 | 0,03872 | -1,55 | -2,92 | 0,00012 | NM_001122962    | OR10H4       |  |
| 8026494 | -1,05 | -2,07 | 0,14772 | -2,37 | -5,17 | 0,00118 | NM_001004465    | ---          |  |
| 8100868 | -1,05 | -2,07 | 0,02183 | -1,28 | -2,43 | 0,00228 | ---             | ---          |  |
| 8097305 | -1,05 | -2,07 | 0,00288 | -0,90 | -1,87 | 0,01518 | ---             | C5orf60      |  |
| 8110518 | -1,05 | -2,07 | 0,09973 | 0,26  | 1,20  | 0,03648 | NM_001142306    | CCDC29       |  |
| 8069508 | -1,05 | -2,07 | 0,12588 | -0,25 | -1,19 | 0,64253 | ENST00000333394 | STAR         |  |
| 8150253 | -1,05 | -2,07 | 0,04872 | -1,46 | -2,75 | 0,00130 | NM_000349       | CYR1         |  |
| 8069668 | -1,05 | -2,07 | 0,00887 | -1,67 | -3,19 | 0,02555 | NM_052954       | RNF133       |  |
| 8142618 | -1,05 | -2,07 | 0,14688 | -1,37 | -2,59 | 0,01263 | NM_139175       | MPP4         |  |
| 8058273 | -1,05 | -2,07 | 0,11212 | -1,87 | -3,65 | 0,06299 | NM_033066       | LGALS13      |  |
| 8028737 | -1,05 | -2,07 | 0,06944 | -2,15 | -4,43 | 0,03196 | NM_013268       | C1orf53      |  |
| 7908525 | -1,05 | -2,07 | 0,03514 | -0,50 | -1,41 | 0,05272 | NM_001024594    | CD180        |  |
| 8112428 | -1,05 | -2,07 | 0,09747 | -0,42 | -1,34 | 0,10577 | NM_005582       | CACNG4       |  |
| 8009334 | -1,05 | -2,07 | 0,03103 | -0,41 | -1,33 | 0,47179 | NM_014405       | RAET1G       |  |
| 8130163 | -1,05 | -2,07 | 0,06004 | -1,22 | -2,32 | 0,03860 | NM_001001788    | ---          |  |
| 8084169 | -1,05 | -2,07 | 0,15153 | -1,39 | -2,62 | 0,01336 | ---             | ---          |  |
| 8103542 | -1,05 | -2,07 | 0,00200 | -1,75 | -3,37 | 0,00689 | ---             | NLRP4        |  |
| 8031576 | -1,05 | -2,07 | 0,01478 | -0,68 | -1,60 | 0,00872 | NM_134444       | C18orf23     |  |
| 8021129 | -1,05 | -2,07 | 0,01927 | -1,05 | -2,07 | 0,08828 | BC093850        | ACCN3        |  |

|         |       |       |         |       |        |         |                 |              |
|---------|-------|-------|---------|-------|--------|---------|-----------------|--------------|
| 8137336 | -1,05 | -2,07 | 0,09053 | -1,06 | -2,09  | 0,00084 | NM_004769       | MIR320C1     |
| 8020419 | -1,05 | -2,07 | 0,15313 | -0,97 | -1,95  | 0,05581 | NR_031565       | ---          |
| 8114546 | -1,05 | -2,07 | 0,05810 | -1,11 | -2,16  | 0,02115 | ---             | TAAR2        |
| 8129610 | -1,05 | -2,07 | 0,15177 | -0,79 | -1,73  | 0,01873 | NM_001033080    | LOC400891    |
| 8071504 | -1,05 | -2,07 | 0,01630 | -1,09 | -2,12  | 0,01836 | NR_027006       | FCN1         |
| 8165011 | -1,05 | -2,07 | 0,02947 | -1,43 | -2,69  | 0,04567 | NM_002003       | ---          |
| 8129456 | -1,05 | -2,07 | 0,06798 | -0,80 | -1,75  | 0,00251 | ---             | ---          |
| 8123959 | -1,05 | -2,07 | 0,07864 | -1,28 | -2,43  | 0,00332 | ---             | SERPINC1     |
| 7922420 | -1,05 | -2,07 | 0,01613 | -0,15 | -1,11  | 0,64937 | NM_000488       | SIGIRR       |
| 7945377 | -1,05 | -2,07 | 0,00825 | 0,12  | 1,09   | 0,77079 | NM_001135053    | ---          |
| 8112407 | -1,05 | -2,07 | 0,03053 | -0,87 | -1,83  | 0,05341 | ---             | ---          |
| 7898112 | -1,05 | -2,07 | 0,17982 | 0,86  | 1,82   | 0,27153 | ---             | GRTP1        |
| 7972890 | -1,05 | -2,07 | 0,10795 | 1,04  | 2,06   | 0,08724 | NM_024719       | PTX4         |
| 7998538 | -1,05 | -2,07 | 0,01065 | -1,46 | -2,74  | 0,01953 | NM_001013658    | TSPAN11      |
| 7954653 | -1,05 | -2,07 | 0,08469 | -0,52 | -1,44  | 0,09472 | NM_001080509    | YPEL4        |
| 7948282 | -1,05 | -2,07 | 0,01204 | -1,27 | -2,42  | 0,00117 | NM_145008       | OR4D11       |
| 7940187 | -1,05 | -2,07 | 0,10245 | -1,61 | -3,06  | 0,00069 | NM_001004706    | FOX2         |
| 8155942 | -1,05 | -2,07 | 0,07087 | -1,59 | -3,01  | 0,00157 | NM_001013735    | ---          |
| 8115012 | -1,05 | -2,07 | 0,02628 | -1,23 | -2,34  | 0,05620 | ---             | MARCO        |
| 8044773 | -1,05 | -2,07 | 0,03407 | -0,97 | -1,96  | 0,00354 | NM_006770       | LOC100130815 |
| 7981190 | -1,05 | -2,07 | 0,06397 | -1,48 | -2,78  | 0,00922 | AL834311        | KCNJ11       |
| 7946853 | -1,05 | -2,07 | 0,01121 | -0,50 | -1,42  | 0,21298 | NM_000525       | RAB4B        |
| 8028930 | -1,05 | -2,07 | 0,02153 | 0,29  | 1,22   | 0,60139 | NM_016154       | CD38         |
| 8094240 | -1,05 | -2,07 | 0,01390 | 3,05  | 8,29   | 0,00002 | NM_001775       | C1orf95      |
| 7910142 | -1,05 | -2,07 | 0,03427 | -1,03 | -2,04  | 0,12179 | NM_001003665    | OR51F2       |
| 7937973 | -1,05 | -2,07 | 0,05512 | -2,05 | -4,14  | 0,04415 | NM_001004753    | IGHE         |
| 7981708 | -1,05 | -2,07 | 0,08858 | -1,47 | -2,77  | 0,06053 | ENST00000390541 | ASMTL        |
| 8171119 | -1,05 | -2,07 | 0,03551 | -0,75 | -1,68  | 0,25442 | NM_004192       | ---          |
| 8050238 | -1,05 | -2,07 | 0,00048 | -0,91 | -1,88  | 0,03423 | ---             | OR4B1        |
| 7939865 | -1,05 | -2,07 | 0,18883 | -1,54 | -2,90  | 0,00109 | NM_001005470    | MAP1D        |
| 8046360 | -1,05 | -2,07 | 0,05283 | 0,00  | -1,00  | 0,99205 | NM_199227       | FAM22F       |
| 8162479 | -1,05 | -2,07 | 0,04329 | -1,35 | -2,54  | 0,05828 | NM_017561       | FBXL14       |
| 7960280 | -1,05 | -2,07 | 0,10269 | -0,28 | -1,21  | 0,36245 | NM_152441       | FAM108A1     |
| 7904869 | -1,05 | -2,07 | 0,04558 | 0,77  | 1,71   | 0,13937 | NM_001130111    | FAM108A1     |
| 7904948 | -1,05 | -2,07 | 0,04558 | 0,77  | 1,71   | 0,13937 | NM_001130111    | ---          |
| 7898673 | -1,05 | -2,07 | 0,02129 | -0,80 | -1,74  | 0,04166 | ---             | SLC28A1      |
| 7985636 | -1,05 | -2,07 | 0,01779 | -0,93 | -1,91  | 0,00047 | NM_004213       | ---          |
| 7900144 | -1,05 | -2,07 | 0,03739 | -0,69 | -1,61  | 0,00145 | ---             | REXO1L2P     |
| 8151631 | -1,05 | -2,07 | 0,58921 | -6,02 | -64,88 | 0,00002 | NR_003594       | KRT79        |
| 7963545 | -1,05 | -2,07 | 0,11264 | -1,72 | -3,30  | 0,00059 | NM_175834       | SYNGAP1      |
| 8118696 | -1,05 | -2,07 | 0,02044 | -0,30 | -1,23  | 0,29081 | NM_006772       | RALGDS       |
| 8164810 | -1,05 | -2,07 | 0,34600 | 2,43  | 5,38   | 0,00269 | NM_006266       | IKBKE        |
| 7923885 | -1,05 | -2,07 | 0,00945 | -1,27 | -2,41  | 0,00078 | NM_014002       | LOC400931    |
| 8073816 | -1,05 | -2,07 | 0,01155 | -0,96 | -1,94  | 0,03940 | NR_027033       | HMH1         |
| 8108900 | -1,05 | -2,07 | 0,02229 | -1,60 | -3,03  | 0,00617 | NM_021182       | ---          |
| 7906015 | -1,05 | -2,07 | 0,10156 | -1,11 | -2,16  | 0,10228 | ---             | RGS11        |
| 7998190 | -1,05 | -2,07 | 0,00317 | -0,30 | -1,23  | 0,31728 | NM_183337       | MPL          |
| 7900683 | -1,05 | -2,07 | 0,06848 | -1,01 | -2,01  | 0,02724 | NM_005373       | ---          |
| 7911335 | -1,05 | -2,07 | 0,06692 | -2,97 | -7,82  | 0,00483 | ---             | ---          |
| 8165694 | -1,05 | -2,07 | 0,06692 | -2,97 | -7,82  | 0,00483 | ---             | GRIN1        |
| 8159583 | -1,05 | -2,07 | 0,01801 | -0,78 | -1,72  | 0,01109 | NM_007327       | ---          |
| 8092455 | -1,05 | -2,07 | 0,01400 | -2,25 | -4,76  | 0,00277 | ---             | ---          |
| 8149279 | -1,05 | -2,07 | 0,00146 | -1,42 | -2,67  | 0,00799 | ---             | ZNF668       |
| 7995030 | -1,05 | -2,07 | 0,05948 | -1,53 | -2,88  | 0,02302 | NM_001172668    | ---          |
| 7978389 | -1,05 | -2,07 | 0,05602 | -2,31 | -4,97  | 0,00276 | ---             | ---          |
| 8084124 | -1,05 | -2,07 | 0,00770 | -1,13 | -2,19  | 0,03265 | ---             | HDGFRP2      |
| 8024864 | -1,05 | -2,07 | 0,08588 | 0,07  | 1,05   | 0,88209 | NM_001001520    | CETP         |
| 7995907 | -1,05 | -2,07 | 0,03576 | -1,39 | -2,62  | 0,00193 | NM_000078       | CPB2         |
| 7971444 | -1,05 | -2,07 | 0,08636 | -1,23 | -2,34  | 0,00092 | NM_001872       | CLEC12A      |
| 7953901 | -1,05 | -2,07 | 0,07429 | -1,10 | -2,15  | 0,00485 | NM_138337       | CHRNA9       |
| 8094751 | -1,05 | -2,07 | 0,00217 | -0,89 | -1,85  | 0,09977 | NM_017581       | TEKT4        |
| 8043491 | -1,05 | -2,07 | 0,00876 | -0,80 | -1,74  | 0,00275 | NM_144705       | CA1          |
| 8151592 | -1,05 | -2,07 | 0,04317 | -1,42 | -2,67  | 0,02219 | NM_001738       | GABRA4       |
| 8100131 | -1,05 | -2,07 | 0,00337 | -1,15 | -2,21  | 0,00160 | NM_000809       | OPN1LW       |
| 8170811 | -1,05 | -2,07 | 0,15367 | -0,65 | -1,57  | 0,11413 | NM_020061       | HIGD1B       |
| 8007701 | -1,05 | -2,07 | 0,04941 | -1,64 | -3,11  | 0,00042 | NM_016438       | FRMD7        |
| 8175155 | -1,05 | -2,07 | 0,00423 | -0,76 | -1,69  | 0,03318 | NM_194277       | GMCL1L       |
| 8116174 | -1,05 | -2,07 | 0,00189 | -0,89 | -1,86  | 0,00767 | NR_003281       | GOLGA6A      |
| 7990654 | -1,05 | -2,07 | 0,41387 | -0,04 | -1,03  | 0,97600 | NM_001038640    | NRXN1        |
| 8052091 | -1,05 | -2,07 | 0,01693 | -1,19 | -2,28  | 0,02591 | NM_004801       | ---          |
| 8109618 | -1,05 | -2,07 | 0,02343 | -1,69 | -3,22  | 0,00071 | ---             | CD2BP2       |
| 8000848 | -1,05 | -2,07 | 0,02877 | -0,47 | -1,38  | 0,44583 | NM_006110       | WBSCR17      |
| 8133258 | -1,05 | -2,08 | 0,04653 | -1,52 | -2,87  | 0,00861 | NM_022479       | ---          |

|         |       |       |         |       |        |         |               |              |  |
|---------|-------|-------|---------|-------|--------|---------|---------------|--------------|--|
| 7975404 | -1,05 | -2,08 | 0,08496 | -1,48 | -2,78  | 0,03918 | ---           | GADD45G      |  |
| 8156309 | -1,05 | -2,08 | 0,01384 | -0,31 | -1,24  | 0,43907 | NM_006705     | ---          |  |
| 8137131 | -1,05 | -2,08 | 0,04755 | -2,15 | -4,44  | 0,03664 | ---           | ---          |  |
| 8165856 | -1,05 | -2,08 | 0,17020 | -1,23 | -2,35  | 0,00653 | ---           | ---          |  |
| 7935401 | -1,05 | -2,08 | 0,02651 | -0,88 | -1,84  | 0,02484 | ---           | SLCO4A1      |  |
| 8067546 | -1,05 | -2,08 | 0,07947 | -1,25 | -2,38  | 0,01355 | NM_016354     | LYZL4        |  |
| 8086400 | -1,05 | -2,08 | 0,01511 | -1,56 | -2,95  | 0,02454 | NM_144634     | IGSF6        |  |
| 8000184 | -1,05 | -2,08 | 0,01491 | -1,49 | -2,81  | 0,00196 | NM_005849     | ZXDC         |  |
| 8090364 | -1,05 | -2,08 | 0,04230 | -0,92 | -1,89  | 0,00869 | AK093796 C7   |              |  |
| 8105084 | -1,05 | -2,08 | 0,07892 | -1,27 | -2,42  | 0,00060 | NM_000587     | SHH          |  |
| 8144078 | -1,05 | -2,08 | 0,02101 | -1,14 | -2,20  | 0,03126 | NM_000193     | ---          |  |
| 8059576 | -1,05 | -2,08 | 0,33925 | -3,43 | -10,80 | 0,00033 | ---           | ZPBP         |  |
| 8139622 | -1,05 | -2,08 | 0,06191 | -0,71 | -1,63  | 0,04035 | NM_007009     | TSPAN16      |  |
| 8034199 | -1,05 | -2,08 | 0,04767 | -1,92 | -3,79  | 0,00095 | NM_012466     | AGAP5        |  |
| 7927305 | -1,05 | -2,08 | 0,02072 | 0,85  | 1,80   | 0,02110 | NM_001144000  | TPD52L3      |  |
| 8154307 | -1,06 | -2,08 | 0,01811 | -1,13 | -2,19  | 0,00956 | NM_033516     | ---          |  |
| 8140317 | -1,06 | -2,08 | 0,01515 | -1,70 | -3,25  | 0,00228 | ---           | ---          |  |
| 7905129 | -1,06 | -2,08 | 0,17779 | -1,20 | -2,29  | 0,02011 | ---           | CECR2        |  |
| 8071086 | -1,06 | -2,08 | 0,03075 | 1,43  | 2,70   | 0,00119 | NM_031413     | C9orf106     |  |
| 8158539 | -1,06 | -2,08 | 0,03812 | -1,82 | -3,52  | 0,01142 | NM_001012715  | FAM115C      |  |
| 8136940 | -1,06 | -2,08 | 0,02058 | -0,94 | -1,91  | 0,00353 | NM_001130026  | ---          |  |
| 8106530 | -1,06 | -2,08 | 0,19177 | -0,37 | -1,29  | 0,14777 | ---           | CDH15        |  |
| 7997880 | -1,06 | -2,08 | 0,04182 | -0,69 | -1,62  | 0,12534 | NM_004933     | ---          |  |
| 8152451 | -1,06 | -2,08 | 0,00007 | -1,59 | -3,01  | 0,00436 | ---           | NT5C1B       |  |
| 8050480 | -1,06 | -2,08 | 0,00697 | -1,05 | -2,07  | 0,00260 | NM_001002006  | ARHGFEF35    |  |
| 8136981 | -1,06 | -2,08 | 0,01338 | -0,18 | -1,14  | 0,61553 | NM_001003702  | ---          |  |
| 7976154 | -1,06 | -2,08 | 0,00054 | -0,66 | -1,58  | 0,00091 | ---           | MBL2         |  |
| 7933665 | -1,06 | -2,08 | 0,12774 | -1,11 | -2,16  | 0,01542 | NM_000242     | SYT4         |  |
| 8022986 | -1,06 | -2,08 | 0,03917 | -0,82 | -1,77  | 0,01118 | NM_020783     | PRY          |  |
| 8176935 | -1,06 | -2,08 | 0,04724 | -1,41 | -2,65  | 0,00834 | NM_004676     | PRY          |  |
| 8177395 | -1,06 | -2,08 | 0,04724 | -1,41 | -2,65  | 0,00834 | NM_004676     | HTRA4        |  |
| 8145989 | -1,06 | -2,08 | 0,00392 | -1,34 | -2,53  | 0,01041 | NM_153692     | ---          |  |
| 8128714 | -1,06 | -2,08 | 0,00538 | -1,06 | -2,08  | 0,00294 | ---           | DBX2         |  |
| 7962481 | -1,06 | -2,08 | 0,00429 | -0,67 | -1,59  | 0,04074 | NM_001004329  | KREMEN2      |  |
| 7992758 | -1,06 | -2,08 | 0,03432 | -1,68 | -3,19  | 0,00205 | NM_172229     | ---          |  |
| 8091731 | -1,06 | -2,08 | 0,06556 | -2,23 | -4,70  | 0,00356 | ---           | KRT72        |  |
| 7963459 | -1,06 | -2,08 | 0,00168 | -1,45 | -2,72  | 0,00089 | NM_080747     | OR6C75       |  |
| 7955993 | -1,06 | -2,08 | 0,07109 | -1,45 | -2,73  | 0,01995 | NM_001005497  | TMEM125      |  |
| 7900654 | -1,06 | -2,08 | 0,02140 | -1,61 | -3,04  | 0,00190 | NM_144626     | GDAP1L1      |  |
| 8062796 | -1,06 | -2,08 | 0,05208 | -1,33 | -2,51  | 0,00552 | NM_024034     | ADARB2       |  |
| 7931764 | -1,06 | -2,08 | 0,05264 | -1,19 | -2,28  | 0,00859 | NM_018702     | DNAJB3       |  |
| 8059832 | -1,06 | -2,08 | 0,03222 | -1,10 | -2,14  | 0,04588 | NM_001001394  | DKFZp761E198 |  |
| 7949490 | -1,06 | -2,08 | 0,09376 | -0,53 | -1,45  | 0,22706 | NM_138368     | SNORA35      |  |
| 8169459 | -1,06 | -2,08 | 0,11614 | -1,51 | -2,84  | 0,03700 | NR_002993     | INHBC        |  |
| 7956423 | -1,06 | -2,08 | 0,12449 | -0,30 | -1,23  | 0,26471 | NM_005538     | CASC1        |  |
| 7961844 | -1,06 | -2,08 | 0,03825 | -1,03 | -2,04  | 0,00405 | NM_018272     | ---          |  |
| 8106816 | -1,06 | -2,08 | 0,06275 | -0,71 | -1,64  | 0,00139 | ---           | VHLL         |  |
| 7920980 | -1,06 | -2,08 | 0,00894 | -1,16 | -2,23  | 0,01678 | NM_001004319  | GPR153       |  |
| 7912004 | -1,06 | -2,08 | 0,05949 | -0,77 | -1,70  | 0,15806 | NM_207370     | PRSS36       |  |
| 8001014 | -1,06 | -2,08 | 0,14867 | -1,38 | -2,60  | 0,06620 | NM_173502     | SLC16A5      |  |
| 8009746 | -1,06 | -2,08 | 0,01735 | 1,17  | 2,25   | 0,05352 | NM_004695     | PNMT         |  |
| 8006900 | -1,06 | -2,08 | 0,02315 | -0,99 | -1,98  | 0,02777 | NM_002686     | ZMAT5        |  |
| 8075276 | -1,06 | -2,08 | 0,01264 | -1,25 | -2,39  | 0,03270 | NM_019103     | ---          |  |
| 7924495 | -1,06 | -2,08 | 0,00885 | -0,56 | -1,48  | 0,00659 | ---           | SPDYE8P      |  |
| 8140211 | -1,06 | -2,08 | 0,29955 | -2,12 | -4,36  | 0,00138 | NR_003664     | C12orf53     |  |
| 7960682 | -1,06 | -2,08 | 0,06284 | -0,62 | -1,54  | 0,21421 | AK289648 KLK4 |              |  |
| 8038655 | -1,06 | -2,08 | 0,01418 | -0,83 | -1,78  | 0,06091 | NM_004917     | APOC4        |  |
| 8029541 | -1,06 | -2,08 | 0,00028 | -1,69 | -3,22  | 0,00010 | NM_001646     | DUSP15       |  |
| 8065580 | -1,06 | -2,08 | 0,04777 | -1,81 | -3,51  | 0,08842 | NM_080611     | AKNAD1       |  |
| 7918235 | -1,06 | -2,08 | 0,13670 | -1,11 | -2,15  | 0,10592 | NM_152763     | ZNF534       |  |
| 8030939 | -1,06 | -2,08 | 0,02017 | -1,04 | -2,06  | 0,02667 | NM_001143938  | ---          |  |
| 8165682 | -1,06 | -2,08 | 0,17478 | -3,16 | -8,91  | 0,00021 | ---           | ---          |  |
| 8114191 | -1,06 | -2,08 | 0,00899 | -1,58 | -3,00  | 0,00101 | ---           | LOC494141    |  |
| 7938750 | -1,06 | -2,08 | 0,01804 | -0,83 | -1,77  | 0,00717 | NR_026541     | CSNK1A1P     |  |
| 7987381 | -1,06 | -2,08 | 0,01691 | -1,27 | -2,42  | 0,01276 | NR_027320     | ---          |  |
| 7937977 | -1,06 | -2,08 | 0,00804 | -0,86 | -1,81  | 0,02237 | ---           | ---          |  |
| 7970672 | -1,06 | -2,08 | 0,02975 | -1,03 | -2,05  | 0,00271 | ---           | ---          |  |
| 7937798 | -1,06 | -2,09 | 0,06969 | -1,42 | -2,67  | 0,02202 | ---           | OR11L1       |  |
| 7925737 | -1,06 | -2,09 | 0,03024 | -1,64 | -3,13  | 0,00274 | NM_001001959  | KCNQ1        |  |
| 7937823 | -1,06 | -2,09 | 0,03690 | -0,36 | -1,28  | 0,22742 | NM_000218     | ---          |  |
| 8170198 | -1,06 | -2,09 | 0,01045 | 0,09  | 1,07   | 0,81111 | ---           | HRH2         |  |
| 8110106 | -1,06 | -2,09 | 0,00951 | -0,59 | -1,51  | 0,30348 | NM_001131055  | ADRA2B       |  |
| 8053869 | -1,06 | -2,09 | 0,20475 | -1,32 | -2,49  | 0,05203 | NM_000682     | CHGB         |  |

|             |       |       |         |       |       |         |                        |                     |
|-------------|-------|-------|---------|-------|-------|---------|------------------------|---------------------|
| 8060805     | -1,06 | -2,09 | 0,06044 | -1,08 | -2,11 | 0,00088 | NM_001819              | F7                  |
| 7970232     | -1,06 | -2,09 | 0,00055 | -1,09 | -2,13 | 0,00156 | NM_000131              | KLHL34              |
| 8171786     | -1,06 | -2,09 | 0,03310 | -1,39 | -2,62 | 0,00216 | NM_153270              | ---                 |
| 8020466     | -1,06 | -2,09 | 0,01658 | -1,34 | -2,54 | 0,00047 | ---                    | IL21R               |
| 7994292     | -1,06 | -2,09 | 0,02291 | -1,70 | -3,24 | 0,01859 | NM_181078              | RBM12B              |
| 8151788     | -1,06 | -2,09 | 0,04510 | -0,44 | -1,36 | 0,16010 | NM_203390              | CLRN3               |
| 7937016     | -1,06 | -2,09 | 0,00112 | 0,00  | 1,00  | 0,98825 | NM_152311              | RYR3                |
| 7982392     | -1,06 | -2,09 | 0,02231 | -1,29 | -2,44 | 0,00009 | NM_001036              | ---                 |
| 7984622     | -1,06 | -2,09 | 0,00011 | -0,28 | -1,21 | 0,19567 | ---                    | DPP10               |
| 8044700     | -1,06 | -2,09 | 0,01365 | -0,63 | -1,55 | 0,00235 | NM_020868              | ---                 |
| 8010184     | -1,06 | -2,09 | 0,19215 | -2,72 | -6,58 | 0,07478 | ---                    | FOXD4L2             |
| 8161571     | -1,06 | -2,09 | 0,15214 | -1,29 | -2,44 | 0,02355 | NM_001099279           | ---                 |
| 8151490     | -1,06 | -2,09 | 0,06106 | -1,43 | -2,69 | 0,00308 | ---                    | RSPH10B             |
| 8138009     | -1,06 | -2,09 | 0,02708 | -0,27 | -1,49 | 0,08320 | NM_173565              | DNAH17              |
| 8018872     | -1,06 | -2,09 | 0,04125 | -1,26 | -2,40 | 0,00346 | NM_173628              | KIF26A              |
| 7977216     | -1,06 | -2,09 | 0,02241 | -1,12 | -2,17 | 0,03919 | NM_015656              | ---                 |
| 8097120     | -1,06 | -2,09 | 0,16369 | -0,92 | -1,89 | 0,00027 | ---                    | COL25A1             |
| 8102263     | -1,06 | -2,09 | 0,11436 | -1,04 | -2,06 | 0,00300 | NM_198721              | ALDH8A1             |
| 8129695     | -1,06 | -2,09 | 0,00247 | -1,39 | -2,62 | 0,07154 | NM_022568              | C17orf87            |
| 8011826     | -1,06 | -2,09 | 0,01802 | -1,43 | -2,69 | 0,02467 | NM_207103              | OR10K2              |
| 7921356     | -1,06 | -2,09 | 0,18576 | -1,37 | -2,59 | 0,00602 | NM_001004476           | NTS                 |
| 7957458     | -1,06 | -2,09 | 0,02390 | -0,98 | -1,97 | 0,00121 | NM_006183              | ---                 |
| 8035903     | -1,06 | -2,09 | 0,04149 | -2,11 | -4,31 | 0,00356 | ---                    | FLJ45139            |
| 8070321     | -1,06 | -2,09 | 0,01845 | -0,86 | -1,82 | 0,12097 | AK127082 GRB7          | ---                 |
| 8006940     | -1,06 | -2,09 | 0,03351 | 0,86  | 1,82  | 0,20522 | NM_001030002           | ---                 |
| 8157729     | -1,06 | -2,09 | 0,23263 | -2,54 | -5,82 | 0,00004 | ---                    | ---                 |
| 7944162     | -1,06 | -2,09 | 0,07923 | -1,28 | -2,43 | 0,00461 | ---                    | ---                 |
| 8001392     | -1,06 | -2,09 | 0,03072 | -0,83 | -1,77 | 0,00614 | ---                    | ---                 |
| 7992197     | -1,06 | -2,09 | 0,05920 | -1,56 | -2,94 | 0,00933 | ---                    | GOLGA6L10           |
| 7990922     | -1,06 | -2,09 | 0,39168 | -0,44 | -1,36 | 0,37154 | NM_001164465           | LOC152586           |
| 8102894     | -1,06 | -2,09 | 0,11454 | -0,96 | -1,94 | 0,00045 | ENST00000388762        | TRIM55              |
| 8146669     | -1,06 | -2,09 | 0,00505 | -1,06 | -2,08 | 0,00836 | NM_033058              | ABHD15              |
| 8013919     | -1,06 | -2,09 | 0,04871 | 0,32  | 1,25  | 0,58828 | NM_198147              | KCNN1               |
| 8026900     | -1,06 | -2,09 | 0,12190 | -0,54 | -1,45 | 0,05367 | NM_002248              | ---                 |
| 8056100     | -1,06 | -2,09 | 0,09841 | -0,09 | -1,06 | 0,45528 | ---                    | ---                 |
| 8054792     | -1,06 | -2,09 | 0,01056 | -0,91 | -1,88 | 0,02411 | ---                    | MAGEA1              |
| 8175775     | -1,06 | -2,09 | 0,00733 | -1,20 | -2,30 | 0,03806 | NM_004988              | TM4SF5              |
| 8003939     | -1,06 | -2,09 | 0,03562 | -1,05 | -2,08 | 0,18384 | NM_003963              | WFDC13              |
| 8063014     | -1,06 | -2,09 | 0,04943 | -1,60 | -3,03 | 0,00988 | NM_172005              | TUSC5               |
| 8003635     | -1,06 | -2,09 | 0,05552 | -1,82 | -3,52 | 0,01523 | NM_172367              | GDNF                |
| 8111670     | -1,06 | -2,09 | 0,07852 | -1,40 | -2,64 | 0,00044 | NM_000514              | APBB1IP             |
| 7926786     | -1,06 | -2,09 | 0,01251 | -0,56 | -1,48 | 0,04696 | NM_019043              | FLJ44313            |
| 8021774     | -1,06 | -2,09 | 0,07394 | -0,38 | -1,30 | 0,34679 | ENST00000405150        | CCKBR               |
| 7938090     | -1,06 | -2,09 | 0,01172 | -1,83 | -3,54 | 0,00986 | NM_176875              | RYR1                |
| 8028407     | -1,06 | -2,09 | 0,01632 | -0,66 | -1,58 | 0,00323 | NM_000540              | SLC34A2             |
| 8094441     | -1,06 | -2,09 | 0,10539 | 3,76  | 13,56 | 0,00054 | NM_006424              | STELLAR             |
| 7973962     | -1,06 | -2,09 | 0,01785 | -1,11 | -2,15 | 0,23263 | BC062480 EXOC3L        | ---                 |
| 8001953     | -1,06 | -2,09 | 0,07772 | -1,63 | -3,09 | 0,02256 | NM_178516              | ---                 |
| 7904394     | -1,06 | -2,09 | 0,16921 | -1,43 | -2,69 | 0,00397 | ---                    | ---                 |
| 8088917     | -1,06 | -2,09 | 0,08524 | -1,69 | -3,22 | 0,00032 | ---                    | CD163               |
| 7960794     | -1,06 | -2,09 | 0,03295 | -1,71 | -3,27 | 0,00303 | NM_004244              | KRTAP3-3 // KRTAP3- |
| 3           |       |       |         |       |       |         |                        |                     |
| 8015163     | -1,06 | -2,09 | 0,02817 | -1,18 | -2,27 | 0,11529 | NM_033185 // NM_033185 | KRTAP3-3            |
| // KRTAP3-3 |       |       |         |       |       |         |                        |                     |
| 8019599     | -1,06 | -2,09 | 0,02817 | -1,18 | -2,27 | 0,11529 | NM_033185 // NM_033185 | MYL7                |
| 8139307     | -1,07 | -2,09 | 0,15331 | -1,30 | -2,47 | 0,05042 | NM_021223              | BANP                |
| 7997755     | -1,07 | -2,09 | 0,12946 | -1,07 | -2,10 | 0,12708 | NM_079837              | MIR126              |
| 8159371     | -1,07 | -2,09 | 0,00278 | -1,09 | -2,13 | 0,00168 | NR_029695              | UGT2B7              |
| 8095395     | -1,07 | -2,09 | 0,07765 | -1,53 | -2,89 | 0,00418 | NM_001074              | ---                 |
| 8151989     | -1,07 | -2,09 | 0,00122 | -1,08 | -2,11 | 0,09587 | ---                    | FAM64A              |
| 8004167     | -1,07 | -2,09 | 0,14588 | 0,71  | 1,64  | 0,41594 | NM_019013              | ---                 |
| 8090934     | -1,07 | -2,09 | 0,01171 | -1,33 | -2,52 | 0,01698 | ---                    | RASSF6              |
| 8100943     | -1,07 | -2,09 | 0,01353 | -0,54 | -1,45 | 0,00083 | NM_201431              | PCSK9               |
| 7901696     | -1,07 | -2,09 | 0,05574 | -1,05 | -2,07 | 0,04841 | NM_174936              | HEJ1                |
| 7903401     | -1,07 | -2,09 | 0,01115 | -0,66 | -1,58 | 0,00760 | NR_033424              | FBXL13              |
| 8141846     | -1,07 | -2,09 | 0,20322 | -0,86 | -1,82 | 0,09798 | NM_145032              | PCDHB6              |
| 8108703     | -1,07 | -2,09 | 0,00998 | -0,51 | -1,42 | 0,07793 | NM_018939              | SLC22A2             |
| 8130582     | -1,07 | -2,09 | 0,04492 | -1,11 | -2,17 | 0,10506 | NM_003058              | ---                 |
| 8045339     | -1,07 | -2,09 | 0,11032 | -0,95 | -1,93 | 0,00602 | ---                    | IGSF8               |
| 7921538     | -1,07 | -2,09 | 0,17509 | 0,84  | 1,79  | 0,38982 | NM_052868              | ---                 |
| 8161646     | -1,07 | -2,09 | 0,01435 | -1,13 | -2,19 | 0,01150 | ---                    | RNF39               |
| 8124695     | -1,07 | -2,09 | 0,04975 | -0,20 | -1,15 | 0,68794 | NM_025236              | RNF39               |
| 8178326     | -1,07 | -2,09 | 0,04975 | -0,20 | -1,15 | 0,68794 | NM_025236              | LRRC27              |

|         |       |       |         |       |       |         |                   |              |
|---------|-------|-------|---------|-------|-------|---------|-------------------|--------------|
| 7931455 | -1,07 | -2,09 | 0,10039 | -1,57 | -2,97 | 0,00002 | NM_001143757      | HHLA2        |
| 8081488 | -1,07 | -2,09 | 0,01849 | -0,81 | -1,75 | 0,01537 | NM_007072         | LOC100128233 |
| 7979691 | -1,07 | -2,09 | 0,03767 | -0,27 | -1,21 | 0,21984 | BX161428 FRMD4B   |              |
| 8088745 | -1,07 | -2,09 | 0,07925 | 0,36  | 1,29  | 0,25378 | NM_015123         | LPO          |
| 8008736 | -1,07 | -2,09 | 0,02794 | -1,51 | -2,85 | 0,03813 | NM_006151         | TMEM88       |
| 8004691 | -1,07 | -2,09 | 0,05935 | 0,29  | 1,22  | 0,63731 | NM_203411         | SNORA70F     |
| 8056359 | -1,07 | -2,09 | 0,00529 | -1,56 | -2,95 | 0,01225 | NR_033309         | ---          |
| 7944262 | -1,07 | -2,10 | 0,04673 | -1,62 | -3,08 | 0,00948 | ---               | MGAT4C       |
| 7965231 | -1,07 | -2,10 | 0,02431 | -1,49 | -2,82 | 0,00141 | NM_013244         | ZNF804B      |
| 8134018 | -1,07 | -2,10 | 0,01057 | -1,55 | -2,93 | 0,00190 | NM_181646         | ---          |
| 8084941 | -1,07 | -2,10 | 0,03436 | -2,44 | -5,43 | 0,00297 | ---               | SCML4        |
| 8128638 | -1,07 | -2,10 | 0,01851 | -1,38 | -2,60 | 0,02079 | NM_198081         | CREG2        |
| 8054338 | -1,07 | -2,10 | 0,00688 | -1,45 | -2,73 | 0,00341 | NM_153836         | ---          |
| 7950893 | -1,07 | -2,10 | 0,12503 | -1,00 | -2,00 | 0,06014 | ---               | WBSCR28      |
| 8133366 | -1,07 | -2,10 | 0,03474 | 0,58  | 1,50  | 0,01767 | NM_182504         | SPINK14      |
| 8109039 | -1,07 | -2,10 | 0,01701 | -1,08 | -2,12 | 0,04132 | NM_001001325      | ---          |
| 8052087 | -1,07 | -2,10 | 0,15660 | -0,45 | -1,37 | 0,26094 | ---               | ---          |
| 8090235 | -1,07 | -2,10 | 0,05203 | -1,57 | -2,96 | 0,03855 | ---               | RAPSN        |
| 7947881 | -1,07 | -2,10 | 0,02337 | -1,41 | -2,65 | 0,00834 | NM_005055         | ---          |
| 8172086 | -1,07 | -2,10 | 0,01018 | -0,79 | -1,73 | 0,01931 | ---               | FBXO9        |
| 8120269 | -1,07 | -2,10 | 0,02001 | -1,36 | -2,56 | 0,02811 | AK095315          | ---          |
| 8152278 | -1,07 | -2,10 | 0,06205 | -1,11 | -2,15 | 0,10522 | ---               | C11orf88     |
| 7943740 | -1,07 | -2,10 | 0,06175 | -1,11 | -2,15 | 0,00645 | NM_207430         | ---          |
| 8132960 | -1,07 | -2,10 | 0,00348 | -0,99 | -1,99 | 0,02163 | ---               | TAF1C        |
| 8003125 | -1,07 | -2,10 | 0,01064 | 0,06  | 1,05  | 0,87060 | NM_005679         | POM121L10P   |
| 8075024 | -1,07 | -2,10 | 0,14284 | -2,44 | -5,42 | 0,00451 | NR_024593         | LOC644950    |
| 8089457 | -1,07 | -2,10 | 0,05157 | -0,99 | -1,98 | 0,05003 | ENST00000414444   | DEFB133      |
| 8126931 | -1,07 | -2,10 | 0,03761 | -1,72 | -3,29 | 0,03095 | NM_001166478      | LOC284837    |
| 8070708 | -1,07 | -2,10 | 0,14486 | -0,82 | -1,76 | 0,18122 | NR_026961         | ---          |
| 7920470 | -1,07 | -2,10 | 0,10724 | -1,38 | -2,61 | 0,02819 | ---               | GPR101       |
| 8175434 | -1,07 | -2,10 | 0,06896 | -0,88 | -1,84 | 0,00349 | NM_054021         | ANO1         |
| 7942135 | -1,07 | -2,10 | 0,02702 | -0,64 | -1,56 | 0,04083 | NM_018043         | SNORA29      |
| 8130580 | -1,07 | -2,10 | 0,01199 | -1,02 | -2,03 | 0,00729 | NR_002965         | ---          |
| 8103309 | -1,07 | -2,10 | 0,04425 | -0,89 | -1,85 | 0,01177 | ---               | ---          |
| 7925739 | -1,07 | -2,10 | 0,24911 | -2,31 | -4,96 | 0,10172 | ---               | C1orf177     |
| 7901675 | -1,07 | -2,10 | 0,00362 | -0,29 | -1,22 | 0,21784 | NM_152607         | OTOS         |
| 8060094 | -1,07 | -2,10 | 0,06281 | -1,71 | -3,27 | 0,00298 | NM_148961         | TGM7         |
| 7988064 | -1,07 | -2,10 | 0,06538 | -1,25 | -2,38 | 0,03078 | NM_052955         | ---          |
| 7991086 | -1,07 | -2,10 | 0,02574 | -0,68 | -1,60 | 0,01207 | ---               | F9           |
| 8170215 | -1,07 | -2,10 | 0,00290 | -1,40 | -2,64 | 0,00000 | NM_000133         | ALKBH7       |
| 8025035 | -1,07 | -2,10 | 0,05235 | -1,11 | -2,15 | 0,06626 | NM_032306         | HPCAL1       |
| 8040238 | -1,07 | -2,10 | 0,07691 | 0,67  | 1,59  | 0,29140 | NM_134421         | ---          |
| 8103458 | -1,07 | -2,10 | 0,13640 | -0,90 | -1,86 | 0,01557 | ---               | DAO          |
| 7958425 | -1,07 | -2,10 | 0,15559 | -1,57 | -2,96 | 0,00845 | NM_001917         | DNAJC5G      |
| 8040889 | -1,07 | -2,10 | 0,04086 | -0,33 | -1,26 | 0,34168 | NM_173650         | ---          |
| 8063240 | -1,07 | -2,10 | 0,09797 | -0,58 | -1,50 | 0,12268 | ---               | ---          |
| 8177068 | -1,07 | -2,10 | 0,05298 | -0,90 | -1,86 | 0,15636 | ---               | ZNF554       |
| 8024511 | -1,07 | -2,10 | 0,04719 | -0,71 | -1,64 | 0,00089 | NM_001102651      | ---          |
| 8081254 | -1,07 | -2,10 | 0,00141 | -1,03 | -2,04 | 0,04211 | ---               | LOC646870    |
| 7922351 | -1,07 | -2,10 | 0,06492 | -1,54 | -2,91 | 0,06118 | AK130460 FLJ42291 |              |
| 8144044 | -1,07 | -2,10 | 0,10097 | -1,51 | -2,85 | 0,03010 | AK124285 OTOG     |              |
| 7938707 | -1,07 | -2,10 | 0,04010 | -1,28 | -2,43 | 0,00354 | ENST00000342528   | NANOS1       |
| 7930872 | -1,07 | -2,10 | 0,02911 | -0,23 | -1,17 | 0,30262 | NM_199461         | LOC648913    |
| 7986565 | -1,07 | -2,10 | 0,20003 | -2,67 | -6,36 | 0,00183 | XM_001126277      | ---          |
| 8011110 | -1,07 | -2,10 | 0,02605 | -1,97 | -3,92 | 0,00711 | ---               | XK           |
| 8166723 | -1,07 | -2,10 | 0,00866 | 1,41  | 2,65  | 0,00992 | NM_021083         | ITLN2        |
| 7921702 | -1,07 | -2,10 | 0,08732 | -1,00 | -2,00 | 0,00495 | NM_080878         | LOC100129038 |
| 7993339 | -1,07 | -2,10 | 0,06076 | -0,62 | -1,54 | 0,02705 | ENST00000391432   | ---          |
| 8161915 | -1,07 | -2,10 | 0,06146 | -1,36 | -2,57 | 0,00036 | ---               | ALPI         |
| 8049137 | -1,07 | -2,10 | 0,01927 | -0,77 | -1,70 | 0,06315 | NM_001631         | PAK6         |
| 7982688 | -1,07 | -2,10 | 0,08999 | -0,26 | -1,19 | 0,53017 | NM_020168         | SERPINA12    |
| 7981098 | -1,07 | -2,10 | 0,00681 | -0,85 | -1,80 | 0,00310 | NM_173850         | MYBL2        |
| 8062766 | -1,07 | -2,10 | 0,01001 | 2,27  | 4,81  | 0,00111 | NM_002466         | GABRG3       |
| 7982117 | -1,07 | -2,10 | 0,00361 | -0,37 | -1,29 | 0,17824 | NM_033223         | SPDYE2       |
| 8135197 | -1,07 | -2,10 | 0,40862 | -2,12 | -4,35 | 0,00121 | NM_001031618      | C21orf88     |
| 8070411 | -1,07 | -2,10 | 0,01250 | -1,23 | -2,34 | 0,01871 | NR_026543         | GRP          |
| 8021461 | -1,07 | -2,10 | 0,08384 | -1,85 | -3,61 | 0,00496 | NM_002091         | DSC1         |
| 8022728 | -1,07 | -2,10 | 0,07128 | -1,27 | -2,41 | 0,00375 | NM_024421         | TIGD6        |
| 8115068 | -1,07 | -2,10 | 0,00139 | -0,39 | -1,31 | 0,39815 | NM_030953         | INO80B       |
| 8042859 | -1,07 | -2,10 | 0,00847 | -0,92 | -1,90 | 0,09640 | NM_031288         | ---          |
| 8171489 | -1,07 | -2,10 | 0,00417 | -1,58 | -2,98 | 0,00094 | ---               | UCN3         |
| 7925950 | -1,07 | -2,10 | 0,03078 | -2,20 | -4,59 | 0,00278 | NM_053049         | SNORD55      |
| 7901046 | -1,07 | -2,10 | 0,11837 | -2,04 | -4,10 | 0,00012 | NR_000015         | UPP2         |

|         |       |       |         |       |       |         |                 |            |
|---------|-------|-------|---------|-------|-------|---------|-----------------|------------|
| 8045848 | -1,07 | -2,10 | 0,01078 | -2,13 | -4,37 | 0,00091 | NM_001135098    | TAS2R60    |
| 8136930 | -1,07 | -2,10 | 0,14220 | -1,17 | -2,26 | 0,06099 | NM_177437       | ---        |
| 8020086 | -1,07 | -2,10 | 0,13833 | -1,21 | -2,32 | 0,00205 | ---             | KIAA0913   |
| 7928408 | -1,07 | -2,10 | 0,03099 | -1,96 | -3,90 | 0,00183 | NM_015037       | HLA-DQB2   |
| 8125463 | -1,07 | -2,10 | 0,09932 | -0,15 | -1,11 | 0,57714 | NR_003937       | ---        |
| 8175367 | -1,07 | -2,10 | 0,05923 | -1,14 | -2,21 | 0,01465 | ---             | ---        |
| 8103875 | -1,07 | -2,10 | 0,01068 | -1,35 | -2,56 | 0,00581 | ---             | NCRNA00169 |
| 7993821 | -1,07 | -2,10 | 0,02365 | 0,11  | 1,08  | 0,60211 | NR_026675       | IL17C      |
| 7997801 | -1,07 | -2,10 | 0,07691 | -1,51 | -2,85 | 0,00385 | NM_013278       | GNRHR2     |
| 7919208 | -1,07 | -2,10 | 0,02984 | -1,17 | -2,24 | 0,14976 | NR_002328       | CCL17      |
| 7996034 | -1,07 | -2,11 | 0,12804 | -1,50 | -2,82 | 0,09197 | NM_002987       | ---        |
| 8143657 | -1,07 | -2,11 | 0,08722 | -1,51 | -2,84 | 0,01012 | ---             | ---        |
| 8114136 | -1,07 | -2,11 | 0,01060 | -1,16 | -2,23 | 0,03025 | ---             | 01. Sep    |
| 8000869 | -1,07 | -2,11 | 0,10316 | -0,57 | -1,48 | 0,22988 | NM_052838       | MOP-1      |
| 8101322 | -1,07 | -2,11 | 0,02472 | -1,25 | -2,37 | 0,00253 | AB014771        | ---        |
| 7907008 | -1,07 | -2,11 | 0,00369 | -1,13 | -2,18 | 0,00491 | ---             | OR3A1      |
| 8011337 | -1,07 | -2,11 | 0,18004 | -1,49 | -2,81 | 0,04779 | NM_002550       | ATF4       |
| 8073148 | -1,07 | -2,11 | 0,07113 | -0,38 | -1,30 | 0,04037 | NM_001675       | FAM81A     |
| 7983991 | -1,07 | -2,11 | 0,01696 | 0,17  | 1,12  | 0,32075 | NM_152450       | SAA1       |
| 7938758 | -1,07 | -2,11 | 0,07622 | -1,81 | -3,49 | 0,00535 | NM_000331       | FAM125A    |
| 8026751 | -1,07 | -2,11 | 0,00015 | 1,42  | 2,67  | 0,05107 | NM_138401       | ACR        |
| 8074153 | -1,07 | -2,11 | 0,31077 | -0,29 | -1,23 | 0,47479 | NM_001097       | C1QA       |
| 7898793 | -1,07 | -2,11 | 0,06423 | -1,66 | -3,16 | 0,00422 | NM_015991       | OR7E87P    |
| 7960896 | -1,07 | -2,11 | 0,45544 | -3,18 | -9,07 | 0,00036 | ENST00000329336 | PDE4C      |
| 8035408 | -1,07 | -2,11 | 0,03053 | -1,78 | -3,44 | 0,01406 | NM_000923       | ---        |
| 8173926 | -1,07 | -2,11 | 0,09004 | -2,06 | -4,16 | 0,00009 | ---             | EDN2       |
| 7915385 | -1,08 | -2,11 | 0,00550 | -0,52 | -1,43 | 0,35974 | NM_001956       | CRYBB2     |
| 8071997 | -1,08 | -2,11 | 0,05131 | -1,73 | -3,32 | 0,01341 | NM_000496       | OR5H14     |
| 8081200 | -1,08 | -2,11 | 0,13322 | -1,25 | -2,38 | 0,08762 | ENST00000341450 | ---        |
| 8029845 | -1,08 | -2,11 | 0,14114 | -1,62 | -3,06 | 0,01148 | ---             | NEURL3     |
| 8053944 | -1,08 | -2,11 | 0,03702 | -0,96 | -1,94 | 0,00499 | NR_026875       | ARMC5      |
| 7995193 | -1,08 | -2,11 | 0,02247 | -1,80 | -3,49 | 0,00103 | NM_024742       | F2         |
| 7939706 | -1,08 | -2,11 | 0,00859 | -1,07 | -2,10 | 0,00001 | NM_000506       | ---        |
| 8144993 | -1,08 | -2,11 | 0,10770 | -1,72 | -3,30 | 0,00012 | ---             | ---        |
| 7979129 | -1,08 | -2,11 | 0,07331 | -0,63 | -1,55 | 0,19643 | ---             | ATP2C2     |
| 7997593 | -1,08 | -2,11 | 0,00498 | -0,26 | -1,20 | 0,49887 | NM_014861       | ---        |
| 7966070 | -1,08 | -2,11 | 0,05106 | -0,58 | -1,49 | 0,00445 | ---             | OR14C36    |
| 7911271 | -1,08 | -2,11 | 0,05741 | -1,89 | -3,71 | 0,00095 | NM_001001918    | TCF23      |
| 8040827 | -1,08 | -2,11 | 0,13734 | -1,55 | -2,93 | 0,00101 | NM_175769       | FAM83E     |
| 8038109 | -1,08 | -2,11 | 0,09810 | -1,20 | -2,30 | 0,00503 | NM_017708       | ---        |
| 8174664 | -1,08 | -2,11 | 0,41301 | -0,39 | -1,31 | 0,44095 | ---             | CALN1      |
| 8139921 | -1,08 | -2,11 | 0,00313 | -1,24 | -2,37 | 0,01721 | NM_001017440    | IVL        |
| 7905533 | -1,08 | -2,11 | 0,01434 | -0,89 | -1,86 | 0,09234 | NM_005547       | ---        |
| 8144514 | -1,08 | -2,11 | 0,00442 | -0,62 | -1,54 | 0,09904 | ---             | IER5       |
| 7907904 | -1,08 | -2,11 | 0,06613 | -2,12 | -4,34 | 0,00252 | NM_016545       | VGLL2      |
| 8121672 | -1,08 | -2,11 | 0,03566 | -1,53 | -2,88 | 0,00177 | NM_182645       | ANKRD57    |
| 8044301 | -1,08 | -2,11 | 0,03030 | 0,70  | 1,63  | 0,10412 | NM_023016       | ---        |
| 8070930 | -1,08 | -2,11 | 0,09200 | -1,55 | -2,93 | 0,00887 | ---             | RPS2P45    |
| 7996879 | -1,08 | -2,11 | 0,01780 | -1,15 | -2,21 | 0,00054 | AK022393        | ZYG11A     |
| 7901497 | -1,08 | -2,11 | 0,13408 | 1,95  | 3,87  | 0,00285 | NM_001004339    | OR4K17     |
| 7973024 | -1,08 | -2,11 | 0,09550 | -0,92 | -1,89 | 0,07139 | NM_001004715    | FAM169B    |
| 7991469 | -1,08 | -2,11 | 0,07960 | -1,67 | -3,18 | 0,00601 | NM_182562       | MGC34796   |
| 7901802 | -1,08 | -2,11 | 0,08917 | -1,57 | -2,98 | 0,05344 | BC034822        | INSL3      |
| 8035345 | -1,08 | -2,11 | 0,08540 | 2,07  | 4,21  | 0,00139 | NM_005543       | PDXP       |
| 8072870 | -1,08 | -2,11 | 0,07874 | -0,92 | -1,89 | 0,28728 | NM_020315       | C11orf86   |
| 7941746 | -1,08 | -2,11 | 0,05814 | -1,18 | -2,26 | 0,00719 | AK026328        | SPATA9     |
| 8113202 | -1,08 | -2,11 | 0,00064 | -1,17 | -2,25 | 0,00486 | NM_031952       | OR6C70     |
| 7963878 | -1,08 | -2,11 | 0,04714 | -1,05 | -2,06 | 0,03394 | NM_001005499    | HCG27      |
| 8118093 | -1,08 | -2,11 | 0,14481 | -1,37 | -2,59 | 0,17521 | NR_026791       | ---        |
| 8142446 | -1,08 | -2,11 | 0,15584 | -1,22 | -2,32 | 0,02265 | ---             | CITED1     |
| 8173524 | -1,08 | -2,11 | 0,03178 | -1,19 | -2,28 | 0,00182 | NM_001144886    | ---        |
| 7899484 | -1,08 | -2,11 | 0,00143 | -1,03 | -2,04 | 0,00042 | ---             | ANKRD22    |
| 7934898 | -1,08 | -2,11 | 0,11444 | -0,35 | -1,27 | 0,24958 | NM_144590       | CD5        |
| 7940409 | -1,08 | -2,11 | 0,07869 | -1,68 | -3,20 | 0,00025 | NM_014207       | MMP23B     |
| 7897006 | -1,08 | -2,11 | 0,10491 | -2,53 | -5,79 | 0,00119 | NM_006983       | ---        |
| 8067963 | -1,08 | -2,11 | 0,00179 | -1,75 | -3,37 | 0,00021 | ---             | RNU2-1     |
| 8019709 | -1,08 | -2,11 | 0,39872 | -2,51 | -5,71 | 0,00550 | NR_002716       | EMILIN1    |
| 8040792 | -1,08 | -2,11 | 0,01925 | -1,33 | -2,51 | 0,01223 | NM_007046       | PGLYRP4    |
| 7920228 | -1,08 | -2,11 | 0,02203 | -0,73 | -1,65 | 0,02972 | NM_020393       | SLURP1     |
| 8153336 | -1,08 | -2,11 | 0,24632 | -1,26 | -2,39 | 0,02806 | NM_020427       | ---        |
| 8042974 | -1,08 | -2,11 | 0,00878 | -1,34 | -2,52 | 0,03222 | ---             | ---        |
| 8095543 | -1,08 | -2,11 | 0,00905 | -1,78 | -3,43 | 0,00194 | ---             | MTMR11     |
| 7919669 | -1,08 | -2,11 | 0,01054 | 0,01  | 1,01  | 0,97352 | NM_001145862    | ---        |

|         |       |       |         |       |       |         |                 |           |  |
|---------|-------|-------|---------|-------|-------|---------|-----------------|-----------|--|
| 8114918 | -1,08 | -2,11 | 0,21420 | -2,08 | -4,23 | 0,00049 | ---             | ---       |  |
| 8168468 | -1,08 | -2,11 | 0,08754 | -1,09 | -2,12 | 0,03825 | ---             | ---       |  |
| 8176280 | -1,08 | -2,11 | 0,08754 | -1,09 | -2,12 | 0,03825 | ---             | ---       |  |
| 7942611 | -1,08 | -2,11 | 0,07577 | -2,40 | -5,27 | 0,00024 | ---             | ---       |  |
| 8137433 | -1,08 | -2,11 | 0,05168 | -0,36 | -1,28 | 0,15546 | ---             | ---       |  |
| 8124482 | -1,08 | -2,11 | 0,04122 | -1,13 | -2,18 | 0,00632 | ---             | ---       |  |
| 8017148 | -1,08 | -2,11 | 0,05804 | -1,18 | -2,27 | 0,00438 | ---             | KIR3DL3   |  |
| 8039820 | -1,08 | -2,11 | 0,14936 | -2,27 | -4,84 | 0,00081 | NM_153443       | TNFRSF1B  |  |
| 7897877 | -1,08 | -2,11 | 0,00001 | -1,46 | -2,75 | 0,01728 | NM_001066       | GLOD5     |  |
| 8167356 | -1,08 | -2,11 | 0,03561 | -1,54 | -2,91 | 0,00482 | NM_001080489    | MIR24-2   |  |
| 8034694 | -1,08 | -2,11 | 0,07138 | -0,77 | -1,70 | 0,00366 | NR_029497       | OR2T34    |  |
| 7925749 | -1,08 | -2,11 | 0,37048 | -2,17 | -4,50 | 0,03414 | NM_001001821    | AMHR2     |  |
| 7955797 | -1,08 | -2,11 | 0,01470 | -1,36 | -2,57 | 0,00321 | NM_020547       | PVRL4     |  |
| 7921773 | -1,08 | -2,11 | 0,02811 | -0,53 | -1,44 | 0,11432 | NM_030916       | FRS3      |  |
| 8126337 | -1,08 | -2,11 | 0,06786 | -0,92 | -1,90 | 0,12592 | NM_006653       | SERPINA5  |  |
| 7976488 | -1,08 | -2,12 | 0,02736 | -1,83 | -3,56 | 0,00558 | NM_000624       | MIR125B1  |  |
| 7952307 | -1,08 | -2,12 | 0,08079 | -1,15 | -2,22 | 0,00016 | NR_029671       | LOC441178 |  |
| 8130807 | -1,08 | -2,12 | 0,01713 | -0,75 | -1,68 | 0,06232 | AL832737        | LOC441178 |  |
| 8130980 | -1,08 | -2,12 | 0,01713 | -0,75 | -1,68 | 0,06232 | AL832737        | ZNF444    |  |
| 8031617 | -1,08 | -2,12 | 0,03818 | -1,45 | -2,73 | 0,00750 | NM_018337       | ---       |  |
| 8021045 | -1,08 | -2,12 | 0,01458 | -0,81 | -1,76 | 0,12554 | ---             | CUZD1     |  |
| 7936798 | -1,08 | -2,12 | 0,00303 | 2,91  | 7,53  | 0,00047 | NM_022034       | ---       |  |
| 8015757 | -1,08 | -2,12 | 0,29814 | -1,22 | -2,32 | 0,01077 | ---             | LOC341912 |  |
| 7980306 | -1,08 | -2,12 | 0,03348 | -1,07 | -2,09 | 0,07415 | ENST00000238638 | RPTN      |  |
| 7920146 | -1,08 | -2,12 | 0,01031 | -2,05 | -4,13 | 0,00076 | NM_001122965    | NCKAP1L   |  |
| 7955908 | -1,08 | -2,12 | 0,00253 | -1,19 | -2,28 | 0,06763 | NM_005337       | ---       |  |
| 8016787 | -1,08 | -2,12 | 0,25935 | -1,91 | -3,75 | 0,01690 | ---             | FITM1     |  |
| 7973580 | -1,08 | -2,12 | 0,11994 | -1,67 | -3,18 | 0,00104 | NM_203402       | APOA1     |  |
| 7951865 | -1,08 | -2,12 | 0,05864 | -1,46 | -2,74 | 0,00038 | NM_000039       | FLJ43950  |  |
| 8156090 | -1,08 | -2,12 | 0,30178 | -2,10 | -4,28 | 0,00725 | NR_026851       | C16orf78  |  |
| 7995442 | -1,08 | -2,12 | 0,07114 | -1,38 | -2,60 | 0,00371 | BC021718        | ASGR2     |  |
| 8012028 | -1,08 | -2,12 | 0,02131 | -0,61 | -1,53 | 0,02734 | NM_080912       | VAR52     |  |
| 8118028 | -1,08 | -2,12 | 0,03913 | 0,55  | 1,46  | 0,19452 | NM_020442       | PPP2R3B   |  |
| 8171087 | -1,08 | -2,12 | 0,02229 | -0,01 | -1,01 | 0,98681 | NM_013239       | ---       |  |
| 7989195 | -1,08 | -2,12 | 0,30378 | -2,44 | -5,42 | 0,02383 | ---             | POC1A     |  |
| 8087839 | -1,08 | -2,12 | 0,01080 | 0,53  | 1,44  | 0,07568 | NM_015426       | PRR5      |  |
| 8073705 | -1,08 | -2,12 | 0,01334 | 0,26  | 1,20  | 0,52867 | NM_181333       | ADH7      |  |
| 8101904 | -1,08 | -2,12 | 0,15393 | -1,54 | -2,90 | 0,00085 | NM_000673       | TAC3      |  |
| 7964303 | -1,08 | -2,12 | 0,03192 | -1,91 | -3,77 | 0,00072 | NR_033654       | ---       |  |
| 8081818 | -1,08 | -2,12 | 0,01656 | -1,84 | -3,59 | 0,00080 | ---             | CCDC38    |  |
| 7965589 | -1,08 | -2,12 | 0,00697 | -0,79 | -1,73 | 0,01348 | NM_182496       | ---       |  |
| 7941563 | -1,08 | -2,12 | 0,25991 | -1,18 | -2,27 | 0,04195 | ---             | WNT10A    |  |
| 8048452 | -1,08 | -2,12 | 0,01060 | -0,55 | -1,46 | 0,03867 | NM_025216       | ---       |  |
| 8173549 | -1,08 | -2,12 | 0,03667 | -2,09 | -4,25 | 0,00172 | ---             | MYL5      |  |
| 8093386 | -1,08 | -2,12 | 0,03271 | -0,91 | -1,88 | 0,01671 | NM_002477       | C15orf54  |  |
| 7982593 | -1,08 | -2,12 | 0,02786 | -1,18 | -2,26 | 0,00737 | NM_207445       | ---       |  |
| 7899251 | -1,08 | -2,12 | 0,06430 | -1,23 | -2,35 | 0,00241 | ---             | LAG3      |  |
| 7953418 | -1,08 | -2,12 | 0,04881 | -1,28 | -2,43 | 0,00115 | NM_002286       | PAX7      |  |
| 7898537 | -1,08 | -2,12 | 0,05551 | -1,22 | -2,32 | 0,02531 | NM_002584       | HRH3      |  |
| 8067394 | -1,08 | -2,12 | 0,14783 | -2,07 | -4,20 | 0,01791 | NM_007232       | TAGAP     |  |
| 8130539 | -1,08 | -2,12 | 0,10149 | -1,61 | -3,04 | 0,00034 | NM_054114       | OR6K2     |  |
| 7921420 | -1,08 | -2,12 | 0,00412 | -2,07 | -4,21 | 0,01891 | NM_001005279    | MIR224    |  |
| 8175683 | -1,08 | -2,12 | 0,11048 | -1,06 | -2,08 | 0,01152 | NR_029638       | SV2C      |  |
| 8106336 | -1,08 | -2,12 | 0,06667 | -1,52 | -2,87 | 0,00540 | NM_014979       | FLJ38109  |  |
| 8109426 | -1,08 | -2,12 | 0,00678 | -0,55 | -1,46 | 0,00683 | AK090581        | ---       |  |
| 8086181 | -1,08 | -2,12 | 0,09688 | -1,79 | -3,45 | 0,00165 | ---             | S100G     |  |
| 8166213 | -1,08 | -2,12 | 0,00043 | -0,74 | -1,67 | 0,07868 | NM_004057       | ---       |  |
| 8122196 | -1,08 | -2,12 | 0,03476 | -0,47 | -1,38 | 0,15524 | ---             | VAR52     |  |
| 8177901 | -1,08 | -2,12 | 0,01494 | 0,49  | 1,41  | 0,20711 | NM_020442       | L3MBTL    |  |
| 8062705 | -1,08 | -2,12 | 0,11349 | -0,30 | -1,23 | 0,26173 | NM_032107       | EPN1      |  |
| 8031550 | -1,09 | -2,12 | 0,00149 | 0,25  | 1,19  | 0,46556 | NM_001130071    | CACNA1E   |  |
| 7907911 | -1,09 | -2,12 | 0,00357 | -1,36 | -2,57 | 0,00015 | NM_000721       | ---       |  |
| 7907788 | -1,09 | -2,12 | 0,05870 | -1,49 | -2,81 | 0,05331 | ---             | TTC21A    |  |
| 8078857 | -1,09 | -2,12 | 0,00840 | -0,65 | -1,56 | 0,00186 | NM_145755       | GDF10     |  |
| 7933372 | -1,09 | -2,12 | 0,05561 | -1,24 | -2,37 | 0,03425 | NM_004962       | C15orf26  |  |
| 7985352 | -1,09 | -2,12 | 0,01903 | -1,72 | -3,29 | 0,00118 | AK302120        | SFTPB     |  |
| 8053467 | -1,09 | -2,12 | 0,08554 | 1,80  | 3,48  | 0,01629 | NM_000542       | DUSP27    |  |
| 7907053 | -1,09 | -2,12 | 0,00138 | -1,62 | -3,08 | 0,00468 | NM_001080426    | OR8I2     |  |
| 7939965 | -1,09 | -2,12 | 0,01452 | -1,29 | -2,45 | 0,00000 | NM_001003750    | TXNDC3    |  |
| 8132349 | -1,09 | -2,12 | 0,01548 | -0,83 | -1,78 | 0,06623 | NM_016616       | OR51I2    |  |
| 7938006 | -1,09 | -2,12 | 0,04368 | -1,07 | -2,10 | 0,01549 | NM_001004754    | NEUROD6   |  |
| 8138882 | -1,09 | -2,12 | 0,00778 | -1,48 | -2,79 | 0,01035 | NM_022728       | CCDC116   |  |
| 8071554 | -1,09 | -2,12 | 0,11830 | -0,93 | -1,90 | 0,14401 | NM_152612       | ---       |  |



|         |       |       |         |       |        |         |                 |           |          |
|---------|-------|-------|---------|-------|--------|---------|-----------------|-----------|----------|
| 7953695 | -1,09 | -2,12 | 0,06094 | -1,21 | -2,32  | 0,00208 | ---             | SHD       |          |
| 8024808 | -1,09 | -2,12 | 0,03003 | -1,62 | -3,08  | 0,00005 | NM_020209       |           | FAM27A   |
| 8155572 | -1,09 | -2,12 | 0,30965 | -0,31 | -1,24  | 0,25128 | NR_024060       | ---       |          |
| 8081032 | -1,09 | -2,12 | 0,12476 | -2,00 | -4,01  | 0,00087 | ---             | LOC254028 |          |
| 7973080 | -1,09 | -2,12 | 0,13300 | -1,42 | -2,68  | 0,10120 | AK093210        | REEP1     |          |
| 8053551 | -1,09 | -2,12 | 0,02711 | 0,03  | 1,02   | 0,89943 | NM_022912       |           | CD69     |
| 7961075 | -1,09 | -2,12 | 0,04063 | -1,17 | -2,26  | 0,01460 | NM_001781       | ---       |          |
| 7967586 | -1,09 | -2,12 | 0,08050 | -1,67 | -3,19  | 0,00991 | ---             | ---       |          |
| 8145912 | -1,09 | -2,12 | 0,12895 | -1,33 | -2,51  | 0,03794 | ---             | ---       |          |
| 8104609 | -1,09 | -2,12 | 0,09201 | -1,78 | -3,43  | 0,01046 | ---             | ---       |          |
| 8129899 | -1,09 | -2,12 | 0,02564 | -0,33 | -1,26  | 0,06266 | ---             | KCNG2     |          |
| 8021900 | -1,09 | -2,12 | 0,04117 | -0,58 | -1,50  | 0,21425 | NM_012283       |           | C1orf46  |
| 7905496 | -1,09 | -2,12 | 0,15611 | -1,33 | -2,52  | 0,13162 | AF005082        | ---       |          |
| 8042530 | -1,09 | -2,13 | 0,09864 | -1,19 | -2,28  | 0,00828 | ---             | TMEM108   |          |
| 8082767 | -1,09 | -2,13 | 0,00307 | 0,42  | 1,34   | 0,07408 | NM_023943       | ---       |          |
| 8059862 | -1,09 | -2,13 | 0,10862 | -1,43 | -2,69  | 0,00379 | ---             | ---       |          |
| 8129693 | -1,09 | -2,13 | 0,09932 | -1,22 | -2,33  | 0,00535 | ---             | ---       |          |
| 8053735 | -1,09 | -2,13 | 0,36184 | -2,52 | -5,74  | 0,00028 | ---             | COL20A1   |          |
| 8064059 | -1,09 | -2,13 | 0,05952 | -0,65 | -1,56  | 0,12065 | NM_020882       | ---       |          |
| 7927704 | -1,09 | -2,13 | 0,00147 | -0,93 | -1,90  | 0,05493 | ---             | TRIP6     |          |
| 8134981 | -1,09 | -2,13 | 0,00537 | -0,63 | -1,54  | 0,17937 | NM_003302       |           | CD53     |
| 7903893 | -1,09 | -2,13 | 0,00699 | -0,38 | -1,30  | 0,10244 | NM_000560       |           | SCRIB    |
| 8153497 | -1,09 | -2,13 | 0,01154 | -0,21 | -1,16  | 0,53210 | NM_182706       |           | DBP      |
| 8038117 | -1,09 | -2,13 | 0,07005 | -0,23 | -1,17  | 0,58878 | NM_001352       |           | ZNF491   |
| 8025951 | -1,09 | -2,13 | 0,01466 | -0,78 | -1,72  | 0,01202 | NM_152356       |           | ADAM18   |
| 8146069 | -1,09 | -2,13 | 0,05940 | -0,61 | -1,53  | 0,01123 | NM_014237       |           | GLRA2    |
| 8166127 | -1,09 | -2,13 | 0,00402 | -1,25 | -2,37  | 0,04767 | NM_002063       |           | CARTPT   |
| 8106088 | -1,09 | -2,13 | 0,02748 | -1,54 | -2,91  | 0,00123 | NM_004291       |           | CARTPT   |
| 8177620 | -1,09 | -2,13 | 0,02748 | -1,54 | -2,91  | 0,00123 | NM_004291       |           | ---      |
| 8052119 | -1,09 | -2,13 | 0,06588 | -1,15 | -2,22  | 0,02619 | ---             | ---       |          |
| 7948135 | -1,09 | -2,13 | 0,04426 | -1,44 | -2,71  | 0,00540 | ---             | CDHR5     |          |
| 7945475 | -1,09 | -2,13 | 0,10630 | -2,02 | -4,07  | 0,00049 | NM_021924       |           | SNORA28  |
| 7977075 | -1,09 | -2,13 | 0,01704 | -0,88 | -1,85  | 0,00121 | NR_002964       |           | C9orf169 |
| 8165639 | -1,09 | -2,13 | 0,10013 | -1,29 | -2,45  | 0,00958 | NM_199001       |           | SLC28A2  |
| 7983447 | -1,09 | -2,13 | 0,00164 | -0,85 | -1,80  | 0,02036 | NM_004212       |           | SNORD82  |
| 8059712 | -1,09 | -2,13 | 0,06482 | -0,98 | -1,97  | 0,00325 | NR_004398       |           | SMCR7    |
| 8005435 | -1,09 | -2,13 | 0,02471 | 0,55  | 1,47   | 0,15009 | NM_148886       |           | SIGLEC7  |
| 8030789 | -1,09 | -2,13 | 0,01468 | -1,06 | -2,08  | 0,00084 | NM_014385       |           | SNORD20  |
| 8059710 | -1,09 | -2,13 | 0,00381 | -1,13 | -2,19  | 0,00107 | NR_002908       |           | NPCDR1   |
| 8088468 | -1,09 | -2,13 | 0,13531 | -2,08 | -4,23  | 0,00805 | AF134979        | FMNL1     |          |
| 8007757 | -1,09 | -2,13 | 0,00630 | 2,18  | 4,55   | 0,00190 | NM_005892       |           | C9orf79  |
| 8156247 | -1,09 | -2,13 | 0,05076 | -1,19 | -2,27  | 0,01859 | NM_178828       |           | KCNJ3    |
| 8045795 | -1,09 | -2,13 | 0,05230 | -1,47 | -2,76  | 0,01132 | NM_002239       |           | GPX5     |
| 8117700 | -1,09 | -2,13 | 0,14753 | -0,99 | -1,98  | 0,04068 | NM_001509       |           | DPY19L2  |
| 7964665 | -1,09 | -2,13 | 0,27585 | -0,98 | -1,97  | 0,04877 | NM_173812       |           | BTN2A3   |
| 8117470 | -1,09 | -2,13 | 0,01906 | -1,07 | -2,10  | 0,15138 | NR_027795       |           | REXO1L2P |
| 8151615 | -1,09 | -2,13 | 0,57159 | -5,85 | -57,59 | 0,00006 | NR_003594       |           | ---      |
| 8083592 | -1,09 | -2,13 | 0,24067 | -1,52 | -2,88  | 0,03142 | ---             | FOXD4L1   |          |
| 8044634 | -1,09 | -2,13 | 0,08626 | -1,70 | -3,25  | 0,00807 | NM_012184       |           | OR5R1    |
| 7948129 | -1,09 | -2,13 | 0,00225 | -1,35 | -2,55  | 0,00366 | NM_00100474     |           | KIR3DL3  |
| 8031260 | -1,09 | -2,13 | 0,10598 | -2,02 | -4,07  | 0,00003 | NM_153443       |           | DNAH7    |
| 8057821 | -1,09 | -2,13 | 0,01115 | -0,98 | -1,97  | 0,03811 | NM_018897       |           | ---      |
| 8092968 | -1,09 | -2,13 | 0,03158 | -0,58 | -1,50  | 0,10746 | ---             | TFR2      |          |
| 8141560 | -1,09 | -2,13 | 0,08159 | -0,97 | -1,96  | 0,26042 | NM_003227       |           | MAPK8IP3 |
| 7992347 | -1,09 | -2,13 | 0,08032 | 0,28  | 1,21   | 0,31713 | NM_015133       |           | TSPYL6   |
| 8052200 | -1,09 | -2,13 | 0,07513 | -1,72 | -3,30  | 0,03998 | NM_001003937    |           | ---      |
| 8021725 | -1,09 | -2,13 | 0,00701 | -1,87 | -3,65  | 0,01429 | ---             | DHR57C    |          |
| 8012591 | -1,09 | -2,13 | 0,10472 | -1,56 | -2,96  | 0,01269 | NM_001105571    |           | TCL1B    |
| 7976544 | -1,09 | -2,13 | 0,00215 | -1,32 | -2,50  | 0,00083 | NM_199206       |           | NPR1     |
| 7905606 | -1,09 | -2,13 | 0,05062 | -0,71 | -1,64  | 0,10816 | NM_000906       |           | CNTN2    |
| 7909064 | -1,09 | -2,13 | 0,05088 | -1,39 | -2,62  | 0,00267 | NM_005076       |           | C8orf79  |
| 8144705 | -1,09 | -2,13 | 0,05013 | -0,61 | -1,53  | 0,02512 | NM_020844       |           | CYP2A7   |
| 8036981 | -1,09 | -2,13 | 0,19361 | -0,81 | -1,75  | 0,09327 | NM_000764       |           | LUZP4    |
| 8169467 | -1,09 | -2,13 | 0,07495 | -1,29 | -2,45  | 0,00022 | NM_016383       |           | LRGUK    |
| 8136315 | -1,09 | -2,13 | 0,04087 | -0,65 | -1,56  | 0,19397 | NM_144648       |           | GZMK     |
| 8105331 | -1,09 | -2,13 | 0,00164 | -1,27 | -2,42  | 0,02802 | NM_002104       |           | LHCGR    |
| 8052058 | -1,09 | -2,13 | 0,01500 | -0,70 | -1,62  | 0,00931 | NM_000233       |           | ---      |
| 8064500 | -1,09 | -2,13 | 0,00842 | -0,92 | -1,89  | 0,01717 | ---             | AKD1      |          |
| 8128777 | -1,09 | -2,13 | 0,01112 | -0,96 | -1,94  | 0,06258 | NM_001145128    |           | PDZD9    |
| 8000229 | -1,09 | -2,13 | 0,00040 | -1,12 | -2,18  | 0,01336 | NM_173806       |           | CRAMP1L  |
| 7992302 | -1,09 | -2,13 | 0,01081 | -1,18 | -2,27  | 0,00617 | NM_020825       |           | FLJ26850 |
| 8030578 | -1,09 | -2,13 | 0,20767 | -1,34 | -2,53  | 0,00072 | ENST00000377006 |           | ERG      |
| 8070297 | -1,09 | -2,13 | 0,06704 | -1,74 | -3,34  | 0,00814 | NM_001136154    |           | PIM3     |

|                                        |       |       |         |       |        |         |                                     |                    |
|----------------------------------------|-------|-------|---------|-------|--------|---------|-------------------------------------|--------------------|
| 8073960                                | -1,09 | -2,13 | 0,03765 | -1,15 | -2,22  | 0,01881 | NM_001001852                        | MMP9               |
| 8063115                                | -1,09 | -2,13 | 0,09196 | -1,51 | -2,84  | 0,00722 | NM_004994                           | ---                |
| 8143142                                | -1,09 | -2,13 | 0,01211 | -1,31 | -2,47  | 0,00062 | ---                                 | FLT3               |
| 7970737                                | -1,09 | -2,13 | 0,00916 | -0,81 | -1,75  | 0,01218 | NM_004119                           | REXO1              |
| 8032347                                | -1,09 | -2,13 | 0,00448 | 0,31  | 1,24   | 0,54172 | NM_020695                           | KIR2DL2            |
| 8039829                                | -1,09 | -2,13 | 0,17996 | -2,15 | -4,43  | 0,00005 | NM_014219                           | MIR520C // MIR520C |
| // MIR520C // MIR520C // MIR520C       |       |       |         |       |        |         |                                     |                    |
| 8031029                                | -1,09 | -2,13 | 0,04651 | -1,29 | -2,45  | 0,02687 | NR_030198 // NR_030198 // NR_030198 |                    |
| // NR_030198 // NR_030198 // NR_030198 |       |       |         |       |        |         |                                     |                    |
| 8006321                                | -1,09 | -2,13 | 0,20250 | -1,39 | -2,62  | 0,00656 | NR_029710                           | CCDC37             |
| 8082270                                | -1,09 | -2,13 | 0,00095 | -1,11 | -2,16  | 0,00296 | NM_182628                           | MIR1826            |
| 7995308                                | -1,09 | -2,13 | 0,15934 | -1,04 | -2,06  | 0,00663 | NR_031727                           | ADIG               |
| 8062527                                | -1,09 | -2,13 | 0,02055 | -2,57 | -5,96  | 0,00016 | NM_001018082                        | OTOR               |
| 8061082                                | -1,09 | -2,13 | 0,05379 | -1,22 | -2,33  | 0,00802 | NM_020157                           | ---                |
| 7904166                                | -1,09 | -2,13 | 0,31563 | -3,42 | -10,72 | 0,00083 | ---                                 | FLG                |
| 7920165                                | -1,09 | -2,13 | 0,11075 | -1,27 | -2,42  | 0,01316 | NM_002016                           | C20orf187          |
| 8060986                                | -1,09 | -2,13 | 0,01468 | -1,09 | -2,12  | 0,02558 | ENST00000378252                     | ---                |
| 8146120                                | -1,09 | -2,13 | 0,03462 | -1,05 | -2,07  | 0,07317 | ---                                 | ---                |
| 7938590                                | -1,09 | -2,13 | 0,04916 | -1,96 | -3,90  | 0,00024 | ---                                 | ---                |
| 7970735                                | -1,09 | -2,13 | 0,19920 | -0,48 | -1,40  | 0,08144 | ---                                 | SFTPA1             |
| 7928602                                | -1,09 | -2,13 | 0,09252 | -1,27 | -2,42  | 0,00057 | NM_005411                           | SFTPA1             |
| 7928632                                | -1,09 | -2,13 | 0,09252 | -1,27 | -2,42  | 0,00057 | NM_005411                           | OTUD7A             |
| 7987099                                | -1,09 | -2,14 | 0,08905 | -1,03 | -2,04  | 0,01752 | NM_130901                           | LOC390561          |
| 7982299                                | -1,09 | -2,14 | 0,14029 | -0,63 | -1,54  | 0,12525 | ENST00000220188                     | HTR5A              |
| 8137517                                | -1,09 | -2,14 | 0,05731 | -2,04 | -4,11  | 0,00546 | NM_024012                           | C9orf84            |
| 8163348                                | -1,09 | -2,14 | 0,00110 | 0,08  | 1,05   | 0,71580 | NM_173521                           | CD79B              |
| 8017511                                | -1,09 | -2,14 | 0,02588 | -1,77 | -3,41  | 0,00746 | NM_000626                           | ---                |
| 8005104                                | -1,09 | -2,14 | 0,01556 | -0,96 | -1,95  | 0,02551 | ---                                 | ---                |
| 8109177                                | -1,09 | -2,14 | 0,00466 | -1,08 | -2,12  | 0,06271 | ---                                 | ---                |
| 8096312                                | -1,09 | -2,14 | 0,08798 | -1,14 | -2,20  | 0,00040 | ---                                 | KIAA1984           |
| 8159385                                | -1,09 | -2,14 | 0,00112 | -0,52 | -1,44  | 0,14418 | NM_001039374                        | BSPH1              |
| 8037959                                | -1,09 | -2,14 | 0,00134 | -0,93 | -1,91  | 0,00524 | NM_001128326                        | CWC25              |
| 8014738                                | -1,10 | -2,14 | 0,04362 | -0,28 | -1,21  | 0,33984 | NM_017748                           | ---                |
| 7918876                                | -1,10 | -2,14 | 0,03632 | -1,62 | -3,07  | 0,00659 | ---                                 | CYTL1              |
| 8099132                                | -1,10 | -2,14 | 0,09455 | -2,37 | -5,18  | 0,00823 | NM_018659                           | CCDC78             |
| 7998307                                | -1,10 | -2,14 | 0,02070 | -1,44 | -2,72  | 0,00508 | NM_001031737                        | ---                |
| 7898572                                | -1,10 | -2,14 | 0,04023 | -1,28 | -2,42  | 0,02986 | ---                                 | PPP1R3D            |
| 8067351                                | -1,10 | -2,14 | 0,00358 | -1,14 | -2,20  | 0,00801 | NM_006242                           | ---                |
| 8104632                                | -1,10 | -2,14 | 0,03468 | -0,97 | -1,97  | 0,01563 | ---                                 | OPRK1              |
| 8150785                                | -1,10 | -2,14 | 0,05777 | -1,26 | -2,39  | 0,00341 | NM_000912                           | ---                |
| 8105409                                | -1,10 | -2,14 | 0,22116 | -0,61 | -1,53  | 0,14508 | ---                                 | APOB48R            |
| 7994353                                | -1,10 | -2,14 | 0,01358 | -1,59 | -3,01  | 0,00146 | NM_018690                           | S100B              |
| 8071036                                | -1,10 | -2,14 | 0,08088 | -1,29 | -2,45  | 0,01652 | NM_006272                           | PDILT              |
| 7999952                                | -1,10 | -2,14 | 0,04868 | -1,49 | -2,82  | 0,02587 | NM_174924                           | LOC100131792       |
| 8107720                                | -1,10 | -2,14 | 0,10516 | -1,34 | -2,53  | 0,01023 | AK093561 SPATA16                    |                    |
| 8092187                                | -1,10 | -2,14 | 0,26242 | -1,62 | -3,08  | 0,00942 | NM_031955                           | SNORD75            |
| 7922416                                | -1,10 | -2,14 | 0,06112 | -1,39 | -2,62  | 0,00345 | NR_003941                           | FAM90A13           |
| 8144424                                | -1,10 | -2,14 | 0,44681 | -2,43 | -5,40  | 0,00547 | NM_001164456                        | FAM90A13           |
| 8144440                                | -1,10 | -2,14 | 0,44681 | -2,43 | -5,40  | 0,00547 | NM_001164456                        | FBXO24             |
| 8134856                                | -1,10 | -2,14 | 0,03210 | -0,20 | -1,15  | 0,21279 | NM_033506                           | PPP2R3B            |
| 8176986                                | -1,10 | -2,14 | 0,01342 | 0,09  | 1,07   | 0,86391 | NM_013239                           | OR11A1             |
| 8124639                                | -1,10 | -2,14 | 0,00213 | -1,09 | -2,14  | 0,00808 | NM_013937                           | C15orf53           |
| 7982587                                | -1,10 | -2,14 | 0,05774 | -1,50 | -2,83  | 0,03763 | NM_207444                           | REG3G              |
| 8042978                                | -1,10 | -2,14 | 0,06972 | -0,89 | -1,85  | 0,00046 | NM_001008387                        | SOCS1              |
| 7999423                                | -1,10 | -2,14 | 0,04832 | -1,87 | -3,64  | 0,00592 | NM_003745                           | IRF5               |
| 8136045                                | -1,10 | -2,14 | 0,00034 | -0,31 | -1,24  | 0,37148 | NM_001098629                        | ---                |
| 8108299                                | -1,10 | -2,14 | 0,00845 | -1,72 | -3,29  | 0,01501 | ---                                 | C21orf45           |
| 8069933                                | -1,10 | -2,14 | 0,00078 | 2,02  | 4,07   | 0,00784 | NM_018944                           | ---                |
| 8113782                                | -1,10 | -2,14 | 0,00774 | -0,85 | -1,80  | 0,03003 | ---                                 | ---                |
| 7927872                                | -1,10 | -2,14 | 0,04517 | -0,75 | -1,69  | 0,16451 | ---                                 | ---                |
| 7961024                                | -1,10 | -2,14 | 0,13408 | -2,31 | -4,96  | 0,03786 | ---                                 | ABCA7              |
| 8024120                                | -1,10 | -2,14 | 0,00470 | 0,47  | 1,38   | 0,22755 | NM_019112                           | FBXL19             |
| 7994967                                | -1,10 | -2,14 | 0,03589 | -0,75 | -1,69  | 0,03553 | NM_001099784                        | HLA-DQA2           |
| 8118564                                | -1,10 | -2,14 | 0,03675 | -2,25 | -4,75  | 0,00260 | NM_020056                           | ITIH3              |
| 8080466                                | -1,10 | -2,14 | 0,04355 | -1,47 | -2,77  | 0,01130 | NM_002217                           | HYI                |
| 7915529                                | -1,10 | -2,14 | 0,04552 | -0,42 | -1,34  | 0,04371 | NM_031207                           | ---                |
| 7926059                                | -1,10 | -2,14 | 0,07852 | -0,82 | -1,77  | 0,03651 | ---                                 | ---                |
| 8146898                                | -1,10 | -2,14 | 0,12953 | -1,36 | -2,57  | 0,01841 | ---                                 | ---                |
| 7942910                                | -1,10 | -2,14 | 0,10059 | -1,36 | -2,56  | 0,00017 | ---                                 | OVOL1              |
| 7941401                                | -1,10 | -2,14 | 0,00096 | 0,26  | 1,20   | 0,33816 | NM_004561                           | MMP21              |
| 7936928                                | -1,10 | -2,14 | 0,00947 | -1,33 | -2,52  | 0,00132 | NM_147191                           | CDH3               |
| 7996819                                | -1,10 | -2,14 | 0,00073 | 3,92  | 15,09  | 0,00023 | NM_001793                           | ---                |
| 8112724                                | -1,10 | -2,14 | 0,09203 | -0,87 | -1,83  | 0,08024 | ---                                 | IRGQ               |

|                                              |       |       |         |       |       |         |                                     |              |
|----------------------------------------------|-------|-------|---------|-------|-------|---------|-------------------------------------|--------------|
| 8037352                                      | -1,10 | -2,14 | 0,00249 | -1,06 | -2,09 | 0,02665 | NM_001007561                        | ---          |
| 8161240                                      | -1,10 | -2,14 | 0,02272 | -1,16 | -2,24 | 0,00056 | ---                                 | SNORD115-32  |
| 7982070                                      | -1,10 | -2,14 | 0,01174 | -0,73 | -1,65 | 0,01623 | NR_003347                           | ---          |
| 8147305                                      | -1,10 | -2,14 | 0,02438 | -0,78 | -1,72 | 0,04945 | ---                                 | DMRTC1       |
| 8173583                                      | -1,10 | -2,14 | 0,03185 | -0,57 | -1,49 | 0,18288 | NM_033053                           | ---          |
| 7972561                                      | -1,10 | -2,14 | 0,37660 | -1,10 | -2,15 | 0,02110 | ---                                 | ---          |
| 8048466                                      | -1,10 | -2,14 | 0,03126 | -1,09 | -2,12 | 0,00533 | ---                                 | ALOX12B      |
| 8012309                                      | -1,10 | -2,14 | 0,00531 | -0,51 | -1,42 | 0,07596 | NM_001139                           | ---          |
| 8045602                                      | -1,10 | -2,14 | 0,01097 | -1,36 | -2,56 | 0,00983 | ---                                 | CABP4        |
| 7941917                                      | -1,10 | -2,14 | 0,06085 | -1,78 | -3,45 | 0,00371 | NM_145200                           | SLCO5A1      |
| 8151223                                      | -1,10 | -2,14 | 0,02324 | 0,29  | 1,23  | 0,11562 | NM_030958                           | LMAN1L       |
| 7984892                                      | -1,10 | -2,14 | 0,00295 | -1,18 | -2,26 | 0,03996 | NM_021819                           | RNU6ATAC //  |
| RNU6ATAC // RNU6ATAC // RNU6ATAC // RNU6ATAC |       |       |         |       |       |         |                                     |              |
| 8112176                                      | -1,10 | -2,14 | 0,00947 | -1,55 | -2,93 | 0,00251 | NR_023344 // NR_023344 // NR_023344 |              |
| // NR_023344 // NR_023344 ---                |       |       |         |       |       |         |                                     |              |
| 8006317                                      | -1,10 | -2,14 | 0,00328 | -0,91 | -1,88 | 0,00200 | ---                                 | FBXL22       |
| 7984152                                      | -1,10 | -2,14 | 0,00707 | -1,68 | -3,20 | 0,00266 | NM_203373                           | MICALCL      |
| 7938519                                      | -1,10 | -2,14 | 0,08613 | -0,83 | -1,78 | 0,12208 | NM_032867                           | SPRR1A       |
| 7905544                                      | -1,10 | -2,14 | 0,03363 | -2,13 | -4,37 | 0,02066 | NM_005987                           | PRKCB        |
| 7994131                                      | -1,10 | -2,14 | 0,00667 | -1,32 | -2,50 | 0,00004 | NM_002738                           | NLE1         |
| 8014214                                      | -1,10 | -2,14 | 0,00018 | 0,37  | 1,29  | 0,12858 | NM_001014445                        | ---          |
| 8104650                                      | -1,10 | -2,15 | 0,00810 | -1,31 | -2,49 | 0,01572 | ---                                 | ---          |
| 8085606                                      | -1,10 | -2,15 | 0,07856 | -1,56 | -2,95 | 0,01164 | ---                                 | BRSK2        |
| 7937667                                      | -1,10 | -2,15 | 0,07606 | -0,31 | -1,24 | 0,11650 | NM_003957                           | POU4F2       |
| 8097687                                      | -1,10 | -2,15 | 0,00876 | -1,74 | -3,34 | 0,01870 | NM_004575                           | ARF6         |
| 7974249                                      | -1,10 | -2,15 | 0,36618 | -0,60 | -1,51 | 0,63965 | NM_001663                           | NCRNA00175   |
| 8070905                                      | -1,10 | -2,15 | 0,05126 | -0,55 | -1,46 | 0,05393 | NR_028082                           | SYT3         |
| 8038587                                      | -1,10 | -2,15 | 0,07432 | -0,38 | -1,30 | 0,50864 | NM_032298                           | TGFA         |
| 8052872                                      | -1,10 | -2,15 | 0,02579 | 0,68  | 1,61  | 0,10682 | NM_003236                           | TOMM40       |
| 8029521                                      | -1,10 | -2,15 | 0,01049 | -0,43 | -1,35 | 0,22053 | NM_001128917                        | ---          |
| 8151434                                      | -1,10 | -2,15 | 0,08162 | -0,88 | -1,84 | 0,01054 | ---                                 | OBSCN        |
| 7924863                                      | -1,10 | -2,15 | 0,11595 | 1,70  | 3,26  | 0,00013 | NM_052843                           | CRABP1       |
| 7990712                                      | -1,10 | -2,15 | 0,07431 | -0,79 | -1,73 | 0,01491 | NM_004378                           | C15orf27     |
| 7985066                                      | -1,10 | -2,15 | 0,02793 | -0,02 | -1,01 | 0,97815 | NM_152335                           | ---          |
| 7924386                                      | -1,10 | -2,15 | 0,00981 | -2,38 | -5,21 | 0,00000 | ---                                 | HSD11B1L     |
| 8024956                                      | -1,10 | -2,15 | 0,03229 | -0,75 | -1,69 | 0,07536 | NM_198706                           | ---          |
| 7943191                                      | -1,10 | -2,15 | 0,36313 | -0,72 | -1,64 | 0,02441 | ---                                 | ---          |
| 8005992                                      | -1,10 | -2,15 | 0,00129 | -1,04 | -2,06 | 0,02925 | ---                                 | PRICKLE3     |
| 8172561                                      | -1,10 | -2,15 | 0,00100 | 0,26  | 1,20  | 0,59228 | NM_006150                           | GGTLC2       |
| 8071662                                      | -1,10 | -2,15 | 0,14620 | -0,70 | -1,63 | 0,10223 | NM_199127                           | DEFB124      |
| 8065566                                      | -1,10 | -2,15 | 0,19573 | -0,65 | -1,57 | 0,36201 | NM_001037500                        | C20orf186    |
| 8061831                                      | -1,10 | -2,15 | 0,01305 | -0,82 | -1,76 | 0,00080 | NM_182519                           | MRPS2        |
| 8159249                                      | -1,10 | -2,15 | 0,10362 | 2,74  | 6,70  | 0,01026 | NM_016034                           | ESPN         |
| 7897288                                      | -1,10 | -2,15 | 0,07956 | -0,63 | -1,55 | 0,06182 | NM_031475                           | PTGES        |
| 8164580                                      | -1,10 | -2,15 | 0,01338 | -0,01 | -1,00 | 0,98892 | NM_004878                           | NPY6R        |
| 8108251                                      | -1,10 | -2,15 | 0,10481 | -1,29 | -2,45 | 0,02950 | NR_002713                           | CPN1         |
| 7935679                                      | -1,10 | -2,15 | 0,00771 | -1,29 | -2,44 | 0,00512 | NM_001308                           | VN1R5        |
| 7911174                                      | -1,10 | -2,15 | 0,10012 | -1,35 | -2,55 | 0,00051 | NM_173858                           | ---          |
| 8112894                                      | -1,10 | -2,15 | 0,15959 | -2,53 | -5,76 | 0,02886 | ---                                 | TNRC18       |
| 8137942                                      | -1,10 | -2,15 | 0,05506 | -0,15 | -1,11 | 0,85858 | NM_001080495                        | CST11        |
| 8065388                                      | -1,10 | -2,15 | 0,00574 | -0,58 | -1,50 | 0,03889 | NM_130794                           | ISG20        |
| 7985777                                      | -1,10 | -2,15 | 0,00531 | -0,21 | -1,16 | 0,55693 | NM_002201                           | C1orf180     |
| 7917251                                      | -1,10 | -2,15 | 0,00022 | -0,53 | -1,44 | 0,00219 | NR_027379                           | TFAP2D       |
| 8120184                                      | -1,10 | -2,15 | 0,01785 | -0,52 | -1,43 | 0,02604 | NM_172238                           | GNG4         |
| 7925250                                      | -1,10 | -2,15 | 0,00875 | 1,73  | 3,31  | 0,00614 | NM_001098721                        | ---          |
| 8112607                                      | -1,10 | -2,15 | 0,09725 | -2,31 | -4,97 | 0,02354 | ---                                 | ---          |
| 8094776                                      | -1,10 | -2,15 | 0,09536 | -0,68 | -1,60 | 0,03492 | ---                                 | ---          |
| 7926894                                      | -1,10 | -2,15 | 0,07155 | -0,77 | -1,71 | 0,05633 | ---                                 | CYP4A11      |
| 7915902                                      | -1,10 | -2,15 | 0,09331 | -1,44 | -2,70 | 0,04837 | NM_000778                           | ---          |
| 7939986                                      | -1,10 | -2,15 | 0,00306 | -1,20 | -2,30 | 0,00213 | ---                                 | TIGIT        |
| 8081799                                      | -1,10 | -2,15 | 0,09020 | -0,47 | -1,38 | 0,26836 | NM_173799                           | ---          |
| 7950530                                      | -1,10 | -2,15 | 0,10602 | -1,34 | -2,53 | 0,00014 | ---                                 | VNN3         |
| 8129627                                      | -1,10 | -2,15 | 0,00622 | -1,34 | -2,53 | 0,00176 | NR_028290                           | TNFAIP2      |
| 7977046                                      | -1,10 | -2,15 | 0,00058 | 1,76  | 3,39  | 0,00790 | NM_006291                           | KLHDC4       |
| 8003283                                      | -1,10 | -2,15 | 0,03120 | 0,14  | 1,10  | 0,64492 | NM_017566                           | SNORD42B     |
| 8005951                                      | -1,11 | -2,15 | 0,03219 | -1,16 | -2,24 | 0,04539 | NR_000013                           | GMFG         |
| 8036710                                      | -1,11 | -2,15 | 0,04657 | -0,97 | -1,96 | 0,00011 | NM_004877                           | ---          |
| 7953975                                      | -1,11 | -2,15 | 0,00755 | -1,27 | -2,41 | 0,03867 | ---                                 | GTPBP6       |
| 8171079                                      | -1,11 | -2,15 | 0,12037 | -1,27 | -2,42 | 0,03821 | ENST00000326153                     | NPFF         |
| 7963689                                      | -1,11 | -2,15 | 0,07209 | -1,04 | -2,05 | 0,05979 | NM_003717                           | KRTAP4-11 // |
| KRTAP4-11                                    |       |       |         |       |       |         |                                     |              |
| 8019570                                      | -1,11 | -2,15 | 0,21297 | -2,92 | -7,59 | 0,00099 | NM_033059 // NM_033059              | OTOP3        |
| 8009713                                      | -1,11 | -2,15 | 0,04126 | -1,21 | -2,31 | 0,00954 | NM_178233                           | DLX4         |

|         |       |       |         |       |       |         |                 |              |
|---------|-------|-------|---------|-------|-------|---------|-----------------|--------------|
| 8008228 | -1,11 | -2,15 | 0,07887 | -0,33 | -1,26 | 0,54215 | NM_138281       | ---          |
| 8074888 | -1,11 | -2,15 | 0,05848 | 0,71  | 1,64  | 0,16156 | ---             | TSNAXIP1     |
| 7996654 | -1,11 | -2,15 | 0,00852 | -0,83 | -1,78 | 0,00941 | NM_018430       | SPAG11B      |
| 8144460 | -1,11 | -2,15 | 0,01094 | -1,06 | -2,09 | 0,00444 | NM_016512       | GFI1         |
| 7917697 | -1,11 | -2,15 | 0,03221 | -0,62 | -1,53 | 0,36231 | NM_005263       | HSPA12B      |
| 8060660 | -1,11 | -2,15 | 0,00735 | -1,60 | -3,02 | 0,00003 | NM_052970       | ---          |
| 8081995 | -1,11 | -2,15 | 0,10180 | -1,25 | -2,38 | 0,00004 | ---             | PRAMEF4      |
| 7912555 | -1,11 | -2,15 | 0,16717 | -0,92 | -1,89 | 0,01504 | NM_001009611    | C4orf19      |
| 8094550 | -1,11 | -2,15 | 0,03548 | -1,14 | -2,21 | 0,00694 | NM_001104629    | OR13A1       |
| 7933219 | -1,11 | -2,15 | 0,04382 | -1,60 | -3,04 | 0,00165 | NM_001004297    | ---          |
| 8053840 | -1,11 | -2,15 | 0,02400 | -1,74 | -3,34 | 0,00516 | ---             | HMGA2        |
| 7964736 | -1,11 | -2,15 | 0,08193 | -1,05 | -2,07 | 0,11934 | AY601863        | MYCL1        |
| 7915277 | -1,11 | -2,15 | 0,06201 | -1,13 | -2,18 | 0,07870 | NM_005376       | GALNTL6      |
| 8098307 | -1,11 | -2,15 | 0,15126 | -1,45 | -2,74 | 0,00222 | NM_001034845    | ARHGAP25     |
| 8042416 | -1,11 | -2,15 | 0,00001 | 0,28  | 1,22  | 0,35335 | NM_014882       | FAM22A       |
| 7928653 | -1,11 | -2,16 | 0,11421 | -0,85 | -1,80 | 0,08393 | NM_001099338    | DYDC2        |
| 7928685 | -1,11 | -2,16 | 0,05160 | -0,66 | -1,58 | 0,00301 | NM_032372       | LSR          |
| 8027793 | -1,11 | -2,16 | 0,00311 | 1,97  | 3,92  | 0,00705 | NM_205834       | SLC2A5       |
| 7912224 | -1,11 | -2,16 | 0,02465 | -1,96 | -3,90 | 0,00960 | NM_003039       | SP6          |
| 8016382 | -1,11 | -2,16 | 0,03183 | -0,22 | -1,17 | 0,63089 | NM_199262       | C13orf16     |
| 7970139 | -1,11 | -2,16 | 0,00149 | -0,84 | -1,78 | 0,31978 | BC029889        | TTL2         |
| 8123398 | -1,11 | -2,16 | 0,08234 | -1,59 | -3,00 | 0,03086 | NM_031949       | PROM2        |
| 8043522 | -1,11 | -2,16 | 0,00617 | -0,81 | -1,75 | 0,19797 | NM_001165978    | ---          |
| 8096075 | -1,11 | -2,16 | 0,03024 | -1,17 | -2,25 | 0,00010 | ---             | EPS8L1       |
| 8031414 | -1,11 | -2,16 | 0,02227 | -0,40 | -1,32 | 0,27295 | NM_133180       | ---          |
| 7965150 | -1,11 | -2,16 | 0,00962 | -0,97 | -1,96 | 0,00714 | ---             | CTSL2        |
| 8162652 | -1,11 | -2,16 | 0,08817 | 0,56  | 1,47  | 0,05881 | NM_001333       | LOC439938    |
| 8124500 | -1,11 | -2,16 | 0,04141 | 0,49  | 1,40  | 0,42608 | AK095259        | DSG4         |
| 8020740 | -1,11 | -2,16 | 0,00756 | -1,33 | -2,51 | 0,00358 | NM_001134453    | PTGER3       |
| 7916944 | -1,11 | -2,16 | 0,00553 | -1,37 | -2,58 | 0,00007 | NR_028294       | PUS1         |
| 7959986 | -1,11 | -2,16 | 0,00879 | 0,66  | 1,58  | 0,36926 | NM_025215       | MGC39545     |
| 7944972 | -1,11 | -2,16 | 0,02720 | -1,41 | -2,65 | 0,01669 | BC036197        | GML          |
| 8148565 | -1,11 | -2,16 | 0,02357 | -0,77 | -1,71 | 0,01672 | NM_002066       | ZIC2         |
| 7969830 | -1,11 | -2,16 | 0,02813 | -0,06 | -1,04 | 0,94643 | NM_007129       | B3GNT3       |
| 8026861 | -1,11 | -2,16 | 0,12129 | -0,16 | -1,12 | 0,61254 | NM_014256       | ---          |
| 7919570 | -1,11 | -2,16 | 0,00214 | -1,08 | -2,11 | 0,16623 | ---             | ANKS4B       |
| 7993815 | -1,11 | -2,16 | 0,02121 | -1,30 | -2,47 | 0,00046 | NM_145865       | GPR179       |
| 8014666 | -1,11 | -2,16 | 0,04545 | -1,56 | -2,94 | 0,00493 | NM_001004334    | ---          |
| 7927056 | -1,11 | -2,16 | 0,19907 | -2,23 | -4,71 | 0,00878 | ---             | CD3D         |
| 7952056 | -1,11 | -2,16 | 0,02206 | -0,69 | -1,61 | 0,00117 | NM_000732       | ---          |
| 7936994 | -1,11 | -2,16 | 0,00199 | -1,30 | -2,47 | 0,00464 | ---             | KLHL36       |
| 7997626 | -1,11 | -2,16 | 0,00636 | 1,13  | 2,19  | 0,15853 | NM_024731       | RAB25        |
| 7906079 | -1,11 | -2,16 | 0,08977 | 1,01  | 2,01  | 0,07060 | NM_020387       | ---          |
| 8094531 | -1,11 | -2,16 | 0,03099 | -1,13 | -2,19 | 0,00046 | ---             | ---          |
| 8013917 | -1,11 | -2,16 | 0,04222 | -1,32 | -2,50 | 0,00011 | ---             | ---          |
| 7930915 | -1,11 | -2,16 | 0,06645 | -0,12 | -1,09 | 0,06411 | ---             | ZNF519       |
| 8022420 | -1,11 | -2,16 | 0,00196 | -0,51 | -1,43 | 0,01128 | NM_145287       | ---          |
| 8085370 | -1,11 | -2,16 | 0,11488 | -0,57 | -1,48 | 0,48018 | ---             | OR8G2        |
| 7944829 | -1,11 | -2,16 | 0,00883 | -1,55 | -2,93 | 0,00026 | ENST00000318460 | NMUR2        |
| 8115368 | -1,11 | -2,16 | 0,01620 | -1,16 | -2,23 | 0,00529 | NM_020167       | FGF12        |
| 8092750 | -1,11 | -2,16 | 0,06327 | 1,03  | 2,05  | 0,04996 | NM_021032       | FIGNL2       |
| 7963328 | -1,11 | -2,16 | 0,03671 | -0,56 | -1,48 | 0,23665 | NM_001013690    | ---          |
| 8109828 | -1,11 | -2,16 | 0,01071 | -0,87 | -1,83 | 0,03846 | ---             | ---          |
| 7908775 | -1,11 | -2,16 | 0,14175 | -0,63 | -1,55 | 0,04467 | ---             | LOC100132356 |
| 8111930 | -1,11 | -2,16 | 0,16522 | -1,52 | -2,86 | 0,00000 | AK075204        | LOC100289181 |
| 8055275 | -1,11 | -2,16 | 0,05218 | -1,01 | -2,01 | 0,04178 | XR_078263       | NDP          |
| 8172220 | -1,11 | -2,16 | 0,00639 | -1,28 | -2,43 | 0,00296 | NM_000266       | D4S234E      |
| 8093839 | -1,11 | -2,16 | 0,05015 | -0,65 | -1,57 | 0,09119 | NM_014392       | ARHGEF38     |
| 8096682 | -1,11 | -2,16 | 0,00835 | -0,82 | -1,77 | 0,03920 | NM_017700       | IL1F10       |
| 8044563 | -1,11 | -2,16 | 0,04412 | -1,52 | -2,87 | 0,00096 | NM_032556       | SNORD44      |
| 7922410 | -1,11 | -2,16 | 0,00247 | -0,37 | -1,29 | 0,22793 | NR_002750       | CILP2        |
| 8027222 | -1,11 | -2,16 | 0,04813 | -2,19 | -4,55 | 0,00535 | NM_153221       | DUOXA1       |
| 7988380 | -1,11 | -2,16 | 0,01089 | -0,28 | -1,21 | 0,44463 | NM_144565       | ---          |
| 7966299 | -1,11 | -2,16 | 0,00958 | -0,81 | -1,76 | 0,04361 | ---             | DUXA         |
| 8039635 | -1,11 | -2,16 | 0,17635 | -1,33 | -2,51 | 0,00279 | NM_001012729    | C20orf27     |
| 8064739 | -1,11 | -2,16 | 0,00628 | -0,73 | -1,65 | 0,34799 | NM_001039140    | AFAP1L1      |
| 8109120 | -1,11 | -2,16 | 0,00954 | -0,40 | -1,32 | 0,15259 | NM_152406       | MORN5        |
| 8157632 | -1,11 | -2,16 | 0,05218 | -1,52 | -2,86 | 0,00182 | NM_198469       | ---          |
| 8112437 | -1,11 | -2,16 | 0,01279 | -1,75 | -3,37 | 0,00582 | ---             | CXCL14       |
| 8114249 | -1,11 | -2,16 | 0,06408 | -0,76 | -1,69 | 0,05838 | NM_004887       | ---          |
| 8154660 | -1,11 | -2,16 | 0,00394 | -0,86 | -1,82 | 0,01422 | ---             | ---          |
| 7962588 | -1,11 | -2,16 | 0,00125 | -1,48 | -2,79 | 0,00067 | ---             | C11orf44     |
| 7945241 | -1,11 | -2,16 | 0,10456 | -0,82 | -1,76 | 0,17238 | AK096377        | C4orf32      |

|         |       |       |         |       |        |         |                        |                      |
|---------|-------|-------|---------|-------|--------|---------|------------------------|----------------------|
| 8096899 | -1,11 | -2,16 | 0,01850 | -0,62 | -1,54  | 0,19619 | NM_152400              | OR4C13               |
| 7948046 | -1,11 | -2,16 | 0,03766 | -1,44 | -2,72  | 0,00035 | NM_001001955           | ---                  |
| 7970507 | -1,11 | -2,16 | 0,00850 | -1,67 | -3,18  | 0,00640 | ---                    | PRG4                 |
| 7908312 | -1,11 | -2,16 | 0,01631 | -1,27 | -2,41  | 0,03355 | NM_005807              | OR3A4                |
| 8003808 | -1,11 | -2,16 | 0,04316 | -1,21 | -2,31  | 0,02053 | NR_024128              | TRH                  |
| 8082574 | -1,11 | -2,16 | 0,05099 | -0,94 | -1,92  | 0,02815 | NM_007117              | CDS1                 |
| 8096130 | -1,11 | -2,16 | 0,00258 | 1,31  | 2,48   | 0,03531 | NM_001263              | ---                  |
| 7958273 | -1,11 | -2,16 | 0,00218 | -0,62 | -1,54  | 0,08901 | ---                    | GZMB                 |
| 7978366 | -1,11 | -2,16 | 0,03698 | -1,03 | -2,04  | 0,00067 | NM_004131              | SPERT                |
| 7968957 | -1,11 | -2,16 | 0,01985 | -1,95 | -3,86  | 0,00347 | NM_152719              | LOC51152             |
| 8071049 | -1,11 | -2,17 | 0,57991 | -4,57 | -23,83 | 0,00027 | AF172850               | ---                  |
| 8048993 | -1,11 | -2,17 | 0,10945 | -0,98 | -1,97  | 0,11963 | ---                    | ---                  |
| 8116245 | -1,11 | -2,17 | 0,00138 | -1,04 | -2,05  | 0,00010 | ---                    | ---                  |
| 8142534 | -1,11 | -2,17 | 0,00593 | -1,00 | -1,99  | 0,00605 | ---                    | COL22A1              |
| 8153101 | -1,11 | -2,17 | 0,01488 | -1,33 | -2,51  | 0,02233 | NM_152888              | TGM3                 |
| 8060432 | -1,11 | -2,17 | 0,06815 | -1,80 | -3,48  | 0,00140 | NM_003245              | ---                  |
| 8017702 | -1,11 | -2,17 | 0,22402 | -0,38 | -1,30  | 0,13586 | ---                    | ---                  |
| 7993255 | -1,11 | -2,17 | 0,15243 | -1,83 | -3,56  | 0,01746 | ---                    | BEX2                 |
| 8174239 | -1,12 | -2,17 | 0,01379 | -1,18 | -2,27  | 0,01041 | NM_032621              | NR5A1                |
| 8164077 | -1,12 | -2,17 | 0,01819 | -0,88 | -1,84  | 0,02684 | NM_004959              | KL                   |
| 7968556 | -1,12 | -2,17 | 0,06547 | -0,45 | -1,36  | 0,14261 | NM_004795              | DUSP9                |
| 8170695 | -1,12 | -2,17 | 0,00200 | -0,83 | -1,78  | 0,07833 | NM_001395              | LOC731797            |
| 8027744 | -1,12 | -2,17 | 0,10378 | -1,60 | -3,04  | 0,02372 | ENST00000313865        | TNFRSF11A            |
| 8021528 | -1,12 | -2,17 | 0,09733 | -1,83 | -3,56  | 0,00025 | NM_003839              | ---                  |
| 7922868 | -1,12 | -2,17 | 0,03237 | -1,75 | -3,36  | 0,00785 | ---                    | GJC3                 |
| 8141371 | -1,12 | -2,17 | 0,11070 | -0,83 | -1,78  | 0,00705 | NM_181538              | LCN6                 |
| 8165277 | -1,12 | -2,17 | 0,09232 | -1,08 | -2,11  | 0,00139 | NM_198946              | ---                  |
| 8035801 | -1,12 | -2,17 | 0,14262 | -1,57 | -2,98  | 0,02702 | ---                    | IKZF3                |
| 8014891 | -1,12 | -2,17 | 0,00432 | -0,70 | -1,63  | 0,00027 | NM_012481              | ---                  |
| 7904450 | -1,12 | -2,17 | 0,01621 | -1,17 | -2,25  | 0,04195 | ---                    | ---                  |
| 7919195 | -1,12 | -2,17 | 0,01621 | -1,17 | -2,25  | 0,04195 | ---                    | LGALS4               |
| 8036591 | -1,12 | -2,17 | 0,05143 | -1,89 | -3,69  | 0,00607 | NM_006149              | C1QB                 |
| 7898805 | -1,12 | -2,17 | 0,04248 | -1,55 | -2,92  | 0,00189 | NM_000491              | GPSM3                |
| 8125373 | -1,12 | -2,17 | 0,14095 | -0,93 | -1,91  | 0,00045 | NM_022107              | GPSM3                |
| 8179987 | -1,12 | -2,17 | 0,14095 | -0,93 | -1,91  | 0,00045 | NM_022107              | ENTHD1               |
| 8076231 | -1,12 | -2,17 | 0,15023 | -0,83 | -1,77  | 0,02494 | NM_152512              | ---                  |
| 7910140 | -1,12 | -2,17 | 0,08249 | -1,74 | -3,35  | 0,01352 | ---                    | ---                  |
| 7985117 | -1,12 | -2,17 | 0,30822 | -2,13 | -4,38  | 0,02897 | ---                    | ---                  |
| 8024494 | -1,12 | -2,17 | 0,01273 | -1,42 | -2,67  | 0,00522 | ---                    | NCR1                 |
| 8031387 | -1,12 | -2,17 | 0,02661 | -1,52 | -2,87  | 0,00128 | NM_004829              | EBF4                 |
| 8060505 | -1,12 | -2,17 | 0,01765 | -1,00 | -2,00  | 0,15548 | NM_001110514           | ---                  |
| 7907349 | -1,12 | -2,17 | 0,12495 | -1,61 | -3,06  | 0,00063 | ---                    | DAOA                 |
| 7972699 | -1,12 | -2,17 | 0,02643 | -1,59 | -3,00  | 0,00306 | NM_001161812           | ---                  |
| 7987648 | -1,12 | -2,17 | 0,00825 | -1,18 | -2,26  | 0,00062 | ---                    | ADAMTS7              |
| 7990736 | -1,12 | -2,17 | 0,20506 | -1,28 | -2,42  | 0,04384 | NM_014272              | PHYHIP               |
| 8149699 | -1,12 | -2,17 | 0,07766 | -0,84 | -1,80  | 0,00894 | NM_001099335           | ZNF663               |
| 8066739 | -1,12 | -2,17 | 0,05166 | -0,89 | -1,85  | 0,11130 | ENST00000400371        | MIR217               |
| 8052372 | -1,12 | -2,17 | 0,00047 | -0,91 | -1,88  | 0,12018 | NR_029630              | PRR10                |
| 7945125 | -1,12 | -2,17 | 0,02408 | -1,75 | -3,35  | 0,01001 | BC113593 C10orf111     |                      |
| 7932221 | -1,12 | -2,17 | 0,04017 | -1,33 | -2,51  | 0,09104 | BC029034 SLC22A10      |                      |
| 7940737 | -1,12 | -2,17 | 0,00095 | -0,99 | -1,99  | 0,00073 | NM_001039752           | PRSS41               |
| 7992716 | -1,12 | -2,17 | 0,04552 | -1,08 | -2,11  | 0,00341 | NM_001135086           | CLCA1                |
| 7902721 | -1,12 | -2,17 | 0,02792 | -0,95 | -1,94  | 0,02117 | NM_001285              | ---                  |
| 8049655 | -1,12 | -2,17 | 0,02262 | -1,01 | -2,01  | 0,01657 | ---                    | ---                  |
| 8044682 | -1,12 | -2,17 | 0,17255 | -1,83 | -3,54  | 0,00174 | ---                    | SNORD102             |
| 7968232 | -1,12 | -2,17 | 0,15864 | -1,30 | -2,47  | 0,00453 | NR_002574              | PPAP2C               |
| 8031999 | -1,12 | -2,17 | 0,14002 | 2,40  | 5,27   | 0,00313 | NM_003712              | ---                  |
| 8167218 | -1,12 | -2,17 | 0,01097 | -0,43 | -1,35  | 0,38714 | ---                    | DPEP2                |
| 8002194 | -1,12 | -2,17 | 0,00857 | -1,81 | -3,52  | 0,00107 | NM_022355              | CLCN1                |
| 8136893 | -1,12 | -2,17 | 0,01552 | -1,41 | -2,66  | 0,00024 | NM_000083              | FAM22A               |
| 7928619 | -1,12 | -2,17 | 0,09271 | -0,76 | -1,69  | 0,07963 | NM_001099338           | ---                  |
| 7968911 | -1,12 | -2,17 | 0,16121 | -1,38 | -2,60  | 0,01744 | ---                    | FLJ46257 // FLJ46257 |
| 8076819 | -1,12 | -2,17 | 0,07085 | -0,58 | -1,50  | 0,01162 | NR_033377 // NR_033377 | TMC05A               |
| 7982552 | -1,12 | -2,17 | 0,02675 | -1,21 | -2,31  | 0,02019 | NM_152453              | FOXA3                |
| 8029754 | -1,12 | -2,17 | 0,07873 | -1,10 | -2,15  | 0,03200 | NM_004497              | GJB1                 |
| 8168274 | -1,12 | -2,17 | 0,19756 | -0,99 | -1,99  | 0,05619 | NM_000166              | ---                  |
| 8095185 | -1,12 | -2,17 | 0,04472 | -1,38 | -2,59  | 0,01350 | ---                    | BHLHA9               |
| 8003633 | -1,12 | -2,17 | 0,04366 | -2,36 | -5,15  | 0,01273 | NM_001164405           | CC2D1A               |
| 8026217 | -1,12 | -2,17 | 0,00310 | 0,17  | 1,12   | 0,62209 | NM_017721              | OMP                  |
| 7942715 | -1,12 | -2,17 | 0,00258 | -0,27 | -1,20  | 0,25286 | NM_006189              | ---                  |
| 8094391 | -1,12 | -2,17 | 0,19936 | -0,64 | -1,56  | 0,02138 | ---                    | ---                  |
| 7931214 | -1,12 | -2,17 | 0,12601 | -2,01 | -4,04  | 0,00009 | ---                    | NUP210L              |
| 7920426 | -1,12 | -2,17 | 0,02738 | -1,39 | -2,62  | 0,00615 | NM_207308              | NLRP13               |

|         |       |       |         |       |        |         |              |              |
|---------|-------|-------|---------|-------|--------|---------|--------------|--------------|
| 8039557 | -1,12 | -2,17 | 0,01302 | -1,09 | -2,13  | 0,00282 | NM_176810    | ---          |
| 8030197 | -1,12 | -2,17 | 0,02552 | -1,17 | -2,24  | 0,01994 | ---          | OR2T33       |
| 7925741 | -1,12 | -2,17 | 0,27550 | -2,82 | -7,04  | 0,00155 | NM_001004695 | HLA-DQA1     |
| 8118556 | -1,12 | -2,17 | 0,09922 | -0,51 | -1,42  | 0,12287 | NM_002122    | ANKRD26P1    |
| 8001113 | -1,12 | -2,17 | 0,01389 | -1,65 | -3,13  | 0,02355 | NR_026556    | OR2J2        |
| 8179005 | -1,12 | -2,17 | 0,10760 | -1,79 | -3,47  | 0,00216 | NM_030905    | HSD17B1      |
| 8007263 | -1,12 | -2,17 | 0,15121 | -1,50 | -2,84  | 0,00393 | NM_000413    | ---          |
| 7961998 | -1,12 | -2,17 | 0,01346 | -2,80 | -6,99  | 0,00355 | ---          | ---          |
| 8011678 | -1,12 | -2,17 | 0,04299 | -0,68 | -1,61  | 0,12057 | ---          | RAB40C       |
| 7991917 | -1,12 | -2,17 | 0,10905 | 0,49  | 1,40   | 0,45004 | NM_021168    | T            |
| 8130703 | -1,12 | -2,17 | 0,01963 | -1,58 | -2,99  | 0,00164 | NM_003181    | ---          |
| 8109503 | -1,12 | -2,18 | 0,01618 | -1,41 | -2,66  | 0,00511 | ---          | KIF5A        |
| 7956522 | -1,12 | -2,18 | 0,02661 | -1,08 | -2,11  | 0,08308 | AF063608     | TAS2R41      |
| 8136934 | -1,12 | -2,18 | 0,11224 | -1,08 | -2,11  | 0,00859 | NM_176883    | SLC17A1      |
| 8124337 | -1,12 | -2,18 | 0,00313 | -1,61 | -3,06  | 0,00024 | NM_005074    | BHLHE22      |
| 8146645 | -1,12 | -2,18 | 0,04100 | -0,80 | -1,74  | 0,06319 | NM_152414    | SOX2         |
| 8084165 | -1,12 | -2,18 | 0,06633 | -1,11 | -2,16  | 0,00942 | NM_003106    | ---          |
| 8027884 | -1,12 | -2,18 | 0,25349 | -2,58 | -5,97  | 0,00070 | ---          | TINAG        |
| 8120315 | -1,12 | -2,18 | 0,03003 | -0,75 | -1,68  | 0,00396 | NM_014464    | KANK4        |
| 7916654 | -1,12 | -2,18 | 0,08716 | -0,91 | -1,88  | 0,04653 | NM_181712    | MKRN3        |
| 7981911 | -1,12 | -2,18 | 0,05625 | -1,26 | -2,40  | 0,06257 | NM_005664    | KATNB1       |
| 7996137 | -1,12 | -2,18 | 0,03385 | -0,03 | -1,02  | 0,95877 | NM_005886    | WFDC10A      |
| 8063011 | -1,12 | -2,18 | 0,05471 | -0,72 | -1,65  | 0,07045 | NM_080753    | MIR124-1     |
| 8149277 | -1,12 | -2,18 | 0,14056 | -1,15 | -2,22  | 0,00018 | NR_029668    | MAB21L1      |
| 7970949 | -1,12 | -2,18 | 0,00950 | -2,06 | -4,17  | 0,00263 | NM_005584    | ---          |
| 8092185 | -1,12 | -2,18 | 0,10487 | -0,99 | -1,99  | 0,01525 | ---          | ---          |
| 8146894 | -1,12 | -2,18 | 0,01341 | -1,00 | -2,00  | 0,01488 | ---          | LOC100293539 |
| 8145795 | -1,12 | -2,18 | 0,02754 | -0,08 | -1,06  | 0,94482 | XM_002346094 | ZNF99        |
| 8035836 | -1,12 | -2,18 | 0,07195 | -1,40 | -2,64  | 0,01893 | BC021822     | HBG1         |
| 7937990 | -1,12 | -2,18 | 0,49856 | -2,03 | -4,08  | 0,03254 | NM_000559    | HBG2         |
| 7937993 | -1,12 | -2,18 | 0,49856 | -2,03 | -4,08  | 0,03254 | NM_000184    | ---          |
| 8127993 | -1,12 | -2,18 | 0,00083 | -1,46 | -2,75  | 0,00011 | ---          | ---          |
| 7928216 | -1,12 | -2,18 | 0,26268 | -1,63 | -3,09  | 0,03487 | ---          | OR8K1        |
| 7939979 | -1,12 | -2,18 | 0,00651 | -1,12 | -2,18  | 0,00449 | NM_001002907 | FUT1         |
| 8038192 | -1,12 | -2,18 | 0,03306 | 0,32  | 1,25   | 0,11776 | NM_000148    | LDLRAD1      |
| 7916364 | -1,12 | -2,18 | 0,05838 | -0,68 | -1,60  | 0,00216 | NM_001010978 | CRCT1        |
| 7905486 | -1,12 | -2,18 | 0,01979 | -1,21 | -2,32  | 0,03230 | NM_019060    | ---          |
| 8164153 | -1,12 | -2,18 | 0,12261 | -1,16 | -2,24  | 0,05055 | ---          | PABPC1L2A    |
| 8173596 | -1,12 | -2,18 | 0,03081 | -0,65 | -1,57  | 0,01780 | NM_001012977 | ---          |
| 8172191 | -1,12 | -2,18 | 0,02042 | -0,69 | -1,62  | 0,03649 | ---          | ---          |
| 7930680 | -1,12 | -2,18 | 0,01157 | -1,18 | -2,26  | 0,00291 | ---          | REXO1L2P     |
| 8151603 | -1,12 | -2,18 | 0,54135 | -5,99 | -63,35 | 0,00001 | NR_003594    | REXO1L2P     |
| 8151607 | -1,12 | -2,18 | 0,54135 | -5,99 | -63,35 | 0,00001 | NR_003594    | REXO1L2P     |
| 8151623 | -1,12 | -2,18 | 0,54135 | -5,99 | -63,35 | 0,00001 | NR_003594    | KRTAP9-4     |
| 8007134 | -1,12 | -2,18 | 0,24516 | -1,30 | -2,46  | 0,00117 | NM_033191    | GOLGA6A      |
| 7985034 | -1,12 | -2,18 | 0,23498 | 0,01  | 1,01   | 0,99049 | NM_001038640 | C21orf93     |
| 8070896 | -1,12 | -2,18 | 0,00646 | -1,02 | -2,03  | 0,11684 | AF427488     | ---          |
| 8043185 | -1,12 | -2,18 | 0,12993 | -1,17 | -2,26  | 0,02930 | ---          | ---          |
| 8118216 | -1,12 | -2,18 | 0,12143 | -1,21 | -2,31  | 0,02274 | ---          | SNORD115-34  |
| 7982074 | -1,12 | -2,18 | 0,01377 | -1,21 | -2,32  | 0,01382 | NR_003349    | ---          |
| 7903117 | -1,12 | -2,18 | 0,04973 | -0,53 | -1,44  | 0,33507 | ---          | REXO1L2P     |
| 8151619 | -1,12 | -2,18 | 0,53767 | -6,05 | -66,32 | 0,00001 | NR_003594    | PTPN5        |
| 7947076 | -1,12 | -2,18 | 0,26172 | -1,35 | -2,55  | 0,00006 | NM_006906    | GPR78        |
| 8094093 | -1,12 | -2,18 | 0,05801 | -1,30 | -2,47  | 0,05555 | NM_080819    | FOXD1        |
| 8112592 | -1,12 | -2,18 | 0,00980 | 0,56  | 1,48   | 0,11660 | NM_004472    | PRAMEF5      |
| 7912567 | -1,12 | -2,18 | 0,15856 | -1,02 | -2,03  | 0,00557 | NM_001013407 | IRX3         |
| 8001449 | -1,12 | -2,18 | 0,12970 | -1,22 | -2,34  | 0,06526 | NM_024336    | ---          |
| 8147479 | -1,12 | -2,18 | 0,04237 | -1,29 | -2,45  | 0,00022 | ---          | ---          |
| 7962137 | -1,12 | -2,18 | 0,01394 | -1,25 | -2,38  | 0,00834 | ---          | IER5L        |
| 8164554 | -1,12 | -2,18 | 0,12166 | -1,50 | -2,83  | 0,01093 | NM_203434    | LACRT        |
| 7963837 | -1,12 | -2,18 | 0,02431 | -0,89 | -1,86  | 0,01278 | NM_033277    | ---          |
| 8016866 | -1,12 | -2,18 | 0,00410 | -1,14 | -2,20  | 0,00068 | ---          | ---          |
| 8176663 | -1,13 | -2,18 | 0,05089 | -1,97 | -3,91  | 0,00003 | ---          | ---          |
| 8177176 | -1,13 | -2,18 | 0,05089 | -1,97 | -3,91  | 0,00003 | ---          | PDCD11       |
| 7936096 | -1,13 | -2,18 | 0,08107 | -0,91 | -1,88  | 0,11269 | NM_014976    | GRIK3        |
| 7914974 | -1,13 | -2,18 | 0,02281 | -1,35 | -2,55  | 0,00250 | NM_000831    | KIF18B       |
| 8016147 | -1,13 | -2,18 | 0,12945 | 0,74  | 1,67   | 0,06901 | NM_001080443 | MUC12        |
| 8135031 | -1,13 | -2,18 | 0,56012 | -3,29 | -9,80  | 0,00011 | NM_001164462 | ---          |
| 7992136 | -1,13 | -2,18 | 0,07290 | -1,71 | -3,27  | 0,00011 | ---          | CORO1A       |
| 7994769 | -1,13 | -2,18 | 0,00589 | -0,75 | -1,68  | 0,12359 | NM_007074    | ---          |
| 7904417 | -1,13 | -2,18 | 0,00117 | -0,89 | -1,86  | 0,01366 | ---          | LGALS14      |
| 8028750 | -1,13 | -2,18 | 0,12658 | -1,09 | -2,13  | 0,02365 | NM_203471    | MYBPHL       |
| 7918313 | -1,13 | -2,18 | 0,00251 | -1,55 | -2,93  | 0,00002 | NM_001010985 | IDO2         |

|         |       |       |         |       |        |         |                 |              |
|---------|-------|-------|---------|-------|--------|---------|-----------------|--------------|
| 8146105 | -1,13 | -2,18 | 0,09129 | -0,96 | -1,95  | 0,07271 | NM_194294       | SSC5D        |
| 8031499 | -1,13 | -2,18 | 0,08264 | -2,03 | -4,08  | 0,00038 | NM_001144950    | CLRN2        |
| 8094253 | -1,13 | -2,18 | 0,00497 | -1,28 | -2,44  | 0,04897 | NM_001079827    | LOC389791    |
| 8158164 | -1,13 | -2,18 | 0,11166 | -1,11 | -2,16  | 0,00205 | NR_024425       | GNG7         |
| 8032509 | -1,13 | -2,18 | 0,01947 | 1,47  | 2,77   | 0,00047 | NM_052847       | TLL13        |
| 7985981 | -1,13 | -2,18 | 0,13730 | -0,33 | -1,26  | 0,15847 | ENST00000438251 | C3orf77      |
| 8079167 | -1,13 | -2,18 | 0,16081 | -0,41 | -1,33  | 0,12047 | NM_001145030    | ---          |
| 8087780 | -1,13 | -2,18 | 0,02466 | -1,05 | -2,08  | 0,10481 | ---             | TNFRSF17     |
| 7999547 | -1,13 | -2,18 | 0,10528 | -0,96 | -1,94  | 0,06103 | NM_001192       | 04. Mrz      |
| 8058849 | -1,13 | -2,18 | 0,08679 | -2,02 | -4,05  | 0,00278 | NM_020814       | LST-3TM12    |
| 7954344 | -1,13 | -2,18 | 0,02531 | -0,14 | -1,10  | 0,70197 | NM_001009562    | ---          |
| 7932790 | -1,13 | -2,18 | 0,09166 | -0,87 | -1,83  | 0,15506 | ---             | TTC36        |
| 7944271 | -1,13 | -2,18 | 0,03382 | -0,80 | -1,74  | 0,01335 | NM_001080441    | REXO1L2P     |
| 8151627 | -1,13 | -2,18 | 0,54523 | -6,21 | -74,18 | 0,00001 | NR_003594       | SAMD1        |
| 8034754 | -1,13 | -2,18 | 0,06133 | -0,97 | -1,96  | 0,14589 | NM_138352       | ---          |
| 8174933 | -1,13 | -2,18 | 0,02165 | -1,81 | -3,50  | 0,00517 | ---             | EPHA8        |
| 7898773 | -1,13 | -2,19 | 0,01045 | -1,02 | -2,03  | 0,00316 | NM_020526       | ---          |
| 8107940 | -1,13 | -2,19 | 0,21120 | -0,67 | -1,59  | 0,23262 | ---             | SCN3B        |
| 7952350 | -1,13 | -2,19 | 0,03344 | -1,83 | -3,57  | 0,00176 | NM_018400       | KCNG4        |
| 8003149 | -1,13 | -2,19 | 0,04037 | -1,25 | -2,37  | 0,03076 | NM_172347       | KIAA1644     |
| 8076668 | -1,13 | -2,19 | 0,02179 | -0,58 | -1,49  | 0,33429 | BC104183 DLEU2  |              |
| 7971653 | -1,13 | -2,19 | 0,07844 | 0,18  | 1,13   | 0,66688 | NR_002612       | PDYN         |
| 8064495 | -1,13 | -2,19 | 0,06370 | -1,50 | -2,83  | 0,00156 | NM_024411       | LOC100132686 |
| 7943890 | -1,13 | -2,19 | 0,00937 | -0,70 | -1,63  | 0,04723 | ENST00000416328 | GPR119       |
| 8175098 | -1,13 | -2,19 | 0,18352 | -2,13 | -4,36  | 0,00220 | NM_178471       | ---          |
| 8119241 | -1,13 | -2,19 | 0,27611 | -1,07 | -2,09  | 0,12200 | ---             | HBG1         |
| 7946048 | -1,13 | -2,19 | 0,01969 | -1,27 | -2,41  | 0,08390 | NM_000559       | HBG1         |
| 7946054 | -1,13 | -2,19 | 0,01969 | -1,27 | -2,41  | 0,08390 | NM_000559       | ---          |
| 8127656 | -1,13 | -2,19 | 0,00549 | -1,02 | -2,03  | 0,01848 | ---             | SNORA36C     |
| 8052826 | -1,13 | -2,19 | 0,02323 | -1,49 | -2,81  | 0,01799 | NR_003705       | ---          |
| 8113489 | -1,13 | -2,19 | 0,04032 | -2,28 | -4,85  | 0,00755 | ---             | HIST1H4G     |
| 8124433 | -1,13 | -2,19 | 0,05279 | -1,09 | -2,13  | 0,02939 | NM_003547       | CSAD         |
| 7963590 | -1,13 | -2,19 | 0,02127 | -0,63 | -1,54  | 0,09177 | NM_015989       | PROK1        |
| 7903884 | -1,13 | -2,19 | 0,09687 | -1,72 | -3,30  | 0,00025 | NM_032414       | FLJ44385     |
| 8073939 | -1,13 | -2,19 | 0,00369 | -1,21 | -2,32  | 0,03272 | AK126356        | ---          |
| 8064900 | -1,13 | -2,19 | 0,04260 | -0,76 | -1,69  | 0,01279 | ---             | LILRA3       |
| 8039226 | -1,13 | -2,19 | 0,23667 | -2,09 | -4,25  | 0,01469 | NM_006865       | MAGEA12      |
| 8175724 | -1,13 | -2,19 | 0,00311 | -1,24 | -2,36  | 0,04289 | NM_001166386    | LOC284379    |
| 8039086 | -1,13 | -2,19 | 0,12113 | -0,96 | -1,95  | 0,01592 | NR_002938       | C8orf85      |
| 8148000 | -1,13 | -2,19 | 0,12378 | -1,19 | -2,28  | 0,03885 | NM_001025357    | ---          |
| 7978329 | -1,13 | -2,19 | 0,00652 | -0,48 | -1,39  | 0,00382 | ---             | OVGP1        |
| 7918504 | -1,13 | -2,19 | 0,05625 | -0,62 | -1,54  | 0,03291 | NM_002557       | UNKL         |
| 7998466 | -1,13 | -2,19 | 0,07377 | -1,30 | -2,47  | 0,00010 | NM_001037125    | ---          |
| 8022104 | -1,13 | -2,19 | 0,05565 | -0,42 | -1,34  | 0,02046 | ---             | LRRC70       |
| 8105579 | -1,13 | -2,19 | 0,00382 | -1,07 | -2,10  | 0,02036 | NM_181506       | ---          |
| 7905462 | -1,13 | -2,19 | 0,04304 | -0,96 | -1,94  | 0,01651 | ---             | PMCHL1       |
| 8104627 | -1,13 | -2,19 | 0,45248 | -0,86 | -1,82  | 0,04616 | NR_003921       | MC4R         |
| 8023593 | -1,13 | -2,19 | 0,02281 | -1,50 | -2,82  | 0,00518 | NM_005912       | METTL7B      |
| 7956009 | -1,13 | -2,19 | 0,02461 | 1,64  | 3,12   | 0,00988 | NM_152637       | C1orf229     |
| 7925687 | -1,13 | -2,19 | 0,18941 | -0,79 | -1,73  | 0,02640 | NM_207401       | SERPINA2     |
| 7981065 | -1,13 | -2,19 | 0,08471 | -1,27 | -2,41  | 0,01759 | ENST00000238576 | SFRP2        |
| 8103254 | -1,13 | -2,19 | 0,04806 | -1,55 | -2,92  | 0,00007 | NM_003013       | ---          |
| 7957956 | -1,13 | -2,19 | 0,13046 | -1,75 | -3,35  | 0,00001 | ---             | C6orf27      |
| 8125072 | -1,13 | -2,19 | 0,00418 | -0,46 | -1,38  | 0,27935 | NM_025258       | C14orf80     |
| 7977418 | -1,13 | -2,19 | 0,02935 | -0,56 | -1,48  | 0,33885 | NM_001134875    | SYCE2        |
| 8034583 | -1,13 | -2,19 | 0,03691 | -0,64 | -1,56  | 0,17876 | NM_001105578    | MYO15A       |
| 8005328 | -1,13 | -2,19 | 0,00832 | -1,23 | -2,34  | 0,01044 | NM_016239       | RNF183       |
| 8163485 | -1,13 | -2,19 | 0,01145 | -1,95 | -3,85  | 0,01494 | NM_145051       | WBSCR27      |
| 8140144 | -1,13 | -2,19 | 0,00919 | -0,23 | -1,17  | 0,38749 | NM_152559       | SPRR2B       |
| 7920201 | -1,13 | -2,19 | 0,08593 | -2,22 | -4,66  | 0,00325 | NM_001017418    | FOXDL3       |
| 8155661 | -1,13 | -2,19 | 0,18483 | -1,21 | -2,32  | 0,02506 | NM_199135       | ---          |
| 8155323 | -1,13 | -2,19 | 0,07384 | -1,45 | -2,72  | 0,00960 | ---             | PIGT         |
| 8066528 | -1,13 | -2,19 | 0,02827 | -0,83 | -1,78  | 0,02991 | ENST00000425680 | LOC100128185 |
| 8039975 | -1,13 | -2,19 | 0,00650 | -1,00 | -2,00  | 0,00456 | AF274944 FAM22A |              |
| 7928645 | -1,13 | -2,19 | 0,10719 | -0,92 | -1,89  | 0,03914 | NM_001099338    | CNTN3        |
| 8088866 | -1,13 | -2,19 | 0,10586 | -1,44 | -2,71  | 0,00059 | NM_020872       | ---          |
| 7952766 | -1,13 | -2,19 | 0,10455 | -1,10 | -2,14  | 0,04874 | ---             | KRT6A        |
| 7963421 | -1,13 | -2,19 | 0,21433 | -1,27 | -2,42  | 0,01490 | NM_005554       | PRMT8        |
| 7953181 | -1,13 | -2,19 | 0,00874 | -1,57 | -2,98  | 0,04376 | NM_019854       | GLB1L3       |
| 7945296 | -1,13 | -2,19 | 0,00072 | -0,29 | -1,22  | 0,18358 | NM_001080407    | CCR6         |
| 8123364 | -1,13 | -2,19 | 0,19510 | -1,18 | -2,27  | 0,00071 | NM_031409       | OR7D2        |
| 8025470 | -1,13 | -2,19 | 0,04229 | -1,53 | -2,90  | 0,00092 | NM_175883       | HEATR7B1     |
| 8049375 | -1,13 | -2,19 | 0,03313 | -1,50 | -2,83  | 0,00088 | ENST00000389758 | FCAMR        |

|         |       |       |         |       |        |         |                   |           |
|---------|-------|-------|---------|-------|--------|---------|-------------------|-----------|
| 7923942 | -1,13 | -2,19 | 0,19213 | -1,39 | -2,62  | 0,00234 | NM_001170631      | KCNS1     |
| 8066475 | -1,13 | -2,19 | 0,01736 | -1,51 | -2,86  | 0,00545 | NM_002251         | ORC1L     |
| 7916167 | -1,13 | -2,19 | 0,01843 | 0,22  | 1,16   | 0,46101 | NM_004153         | ALPK746   |
| 8143725 | -1,13 | -2,19 | 0,08342 | -0,76 | -1,69  | 0,13423 | NM_001163474      | PCDH11X   |
| 8168657 | -1,13 | -2,19 | 0,02119 | -1,27 | -2,40  | 0,00108 | NM_032967         | ---       |
| 7969975 | -1,13 | -2,19 | 0,23021 | -1,36 | -2,56  | 0,02075 | --- UPP1          | ---       |
| 8132725 | -1,13 | -2,19 | 0,06042 | 0,57  | 1,48   | 0,02506 | NM_003364         | ---       |
| 7966227 | -1,13 | -2,19 | 0,05532 | -0,88 | -1,84  | 0,00094 | ---               | ---       |
| 8051202 | -1,13 | -2,19 | 0,01795 | -1,79 | -3,47  | 0,00169 | --- FOXJ1         | ---       |
| 8018646 | -1,13 | -2,19 | 0,00648 | -0,71 | -1,64  | 0,00789 | NM_001454         | PDE11A    |
| 8057004 | -1,13 | -2,19 | 0,00825 | -0,24 | -1,18  | 0,54469 | NM_001077197      | MCF2L     |
| 7970194 | -1,13 | -2,19 | 0,04766 | -0,70 | -1,63  | 0,04419 | NM_001112732      | WDR88     |
| 8027543 | -1,13 | -2,19 | 0,01575 | -0,55 | -1,46  | 0,28490 | NM_173479         | GJD4      |
| 7927028 | -1,13 | -2,19 | 0,07323 | -2,28 | -4,87  | 0,00449 | NM_153368         | ALPK3     |
| 7985620 | -1,13 | -2,20 | 0,00922 | -1,19 | -2,28  | 0,00243 | NM_020778         | ZSCAN22   |
| 8031908 | -1,13 | -2,20 | 0,17643 | -0,01 | -1,01  | 0,98281 | NM_181846         | L1TD1     |
| 7901860 | -1,13 | -2,20 | 0,00601 | -1,35 | -2,55  | 0,00077 | NM_001164835      | ---       |
| 8084927 | -1,13 | -2,20 | 0,00215 | -0,75 | -1,68  | 0,02426 | --- KRTAP10-4     | ---       |
| 8069142 | -1,13 | -2,20 | 0,40666 | -2,99 | -7,97  | 0,00048 | NM_198687         | ---       |
| 8176737 | -1,13 | -2,20 | 0,00612 | -1,47 | -2,78  | 0,03661 | --- PAX5          | ---       |
| 8161211 | -1,14 | -2,20 | 0,04402 | -1,66 | -3,16  | 0,02663 | NM_016734         | C16orf75  |
| 7993248 | -1,14 | -2,20 | 0,05244 | -0,57 | -1,49  | 0,25942 | NM_152308         | INPP5D    |
| 8049246 | -1,14 | -2,20 | 0,00830 | -0,44 | -1,36  | 0,21083 | NM_001017915      | SNORA5C   |
| 8139484 | -1,14 | -2,20 | 0,19872 | -1,35 | -2,54  | 0,01919 | NR_002991         | ---       |
| 7999384 | -1,14 | -2,20 | 0,10704 | -1,92 | -3,79  | 0,00352 | --- APCDD1L       | ---       |
| 8067270 | -1,14 | -2,20 | 0,04400 | -1,88 | -3,69  | 0,00026 | NM_153360         | C1orf94   |
| 7899911 | -1,14 | -2,20 | 0,12477 | -1,18 | -2,26  | 0,00676 | NM_001134734      | TP53I13   |
| 8006052 | -1,14 | -2,20 | 0,08468 | -0,75 | -1,68  | 0,20416 | NM_138349         | UNC80     |
| 8047965 | -1,14 | -2,20 | 0,00168 | -1,10 | -2,15  | 0,00504 | NM_032504         | ---       |
| 8174195 | -1,14 | -2,20 | 0,05456 | -1,20 | -2,30  | 0,04458 | --- DSCR8         | ---       |
| 8068570 | -1,14 | -2,20 | 0,13799 | -1,61 | -3,05  | 0,06425 | NR_026839         | ---       |
| 8098421 | -1,14 | -2,20 | 0,19473 | -1,86 | -3,63  | 0,03579 | --- OR4D10        | ---       |
| 7940182 | -1,14 | -2,20 | 0,25359 | -4,31 | -19,89 | 0,00010 | NM_001004705      | ---       |
| 8043480 | -1,14 | -2,20 | 0,37054 | -3,10 | -8,59  | 0,00050 | --- FER1L4        | ---       |
| 8065948 | -1,14 | -2,20 | 0,00277 | -0,58 | -1,50  | 0,23386 | NR_024377         | EPN3      |
| 8008372 | -1,14 | -2,20 | 0,06518 | -1,64 | -3,12  | 0,02867 | NM_017957         | TTL10     |
| 7896865 | -1,14 | -2,20 | 0,08305 | -1,70 | -3,25  | 0,00008 | NM_153254         | FOLR2     |
| 7942372 | -1,14 | -2,20 | 0,02497 | -1,57 | -2,97  | 0,00013 | NM_000803         | LOC158696 |
| 8175442 | -1,14 | -2,20 | 0,06295 | -1,87 | -3,67  | 0,02676 | NR_026935         | ---       |
| 8047963 | -1,14 | -2,20 | 0,20454 | -1,26 | -2,40  | 0,00052 | --- WIPF3         | ---       |
| 8132036 | -1,14 | -2,20 | 0,01922 | 0,77  | 1,71   | 0,24859 | NM_001080529      | RAB11FIP3 |
| 7991860 | -1,14 | -2,20 | 0,00416 | -0,57 | -1,48  | 0,20157 | NM_014700         | ---       |
| 8117286 | -1,14 | -2,20 | 0,10103 | -0,99 | -1,99  | 0,07667 | --- CPLX3         | ---       |
| 7984914 | -1,14 | -2,20 | 0,01683 | -0,45 | -1,37  | 0,13805 | NM_001030005      | ---       |
| 8172084 | -1,14 | -2,20 | 0,07401 | -1,11 | -2,17  | 0,00499 | ---               | ---       |
| 8141765 | -1,14 | -2,20 | 0,07214 | -1,23 | -2,35  | 0,00423 | ---               | ---       |
| 8136213 | -1,14 | -2,20 | 0,11929 | -1,45 | -2,73  | 0,00259 | --- SLC8A3        | ---       |
| 7979888 | -1,14 | -2,20 | 0,00767 | -2,17 | -4,50  | 0,00024 | NM_033262         | GAB1      |
| 8102982 | -1,14 | -2,20 | 0,11441 | -1,22 | -2,33  | 0,01821 | BC064848 NKG7     | ---       |
| 8038809 | -1,14 | -2,20 | 0,15159 | -1,79 | -3,47  | 0,05323 | NM_005601         | SPHK1     |
| 8010061 | -1,14 | -2,20 | 0,01017 | -0,18 | -1,14  | 0,63694 | NM_182965         | RGAG1     |
| 8169378 | -1,14 | -2,20 | 0,02297 | -1,13 | -2,19  | 0,02061 | NM_020769         | CDH16     |
| 8001898 | -1,14 | -2,20 | 0,01360 | -0,96 | -1,94  | 0,02333 | NM_004062         | ---       |
| 7977438 | -1,14 | -2,20 | 0,14357 | -0,73 | -1,65  | 0,19230 | --- NUDT17        | ---       |
| 7919217 | -1,14 | -2,20 | 0,02376 | 0,86  | 1,81   | 0,09308 | NM_001012758      | SLC3A1    |
| 8041727 | -1,14 | -2,20 | 0,03402 | -0,95 | -1,93  | 0,00247 | NM_000341         | NR2E3     |
| 7984606 | -1,14 | -2,20 | 0,01837 | -0,49 | -1,40  | 0,14345 | NM_014249         | NEUROD1   |
| 8057480 | -1,14 | -2,20 | 0,00779 | -1,45 | -2,73  | 0,00374 | NM_002500         | RHPN1     |
| 8148621 | -1,14 | -2,20 | 0,10470 | 0,40  | 1,32   | 0,51323 | NM_052924         | RNF113B   |
| 7972438 | -1,14 | -2,20 | 0,06081 | -1,55 | -2,93  | 0,03831 | NM_178861         | NDOR1     |
| 8159616 | -1,14 | -2,20 | 0,02079 | 0,68  | 1,60   | 0,18486 | NM_001144026      | LCE2A     |
| 7905507 | -1,14 | -2,20 | 0,19197 | -2,74 | -6,69  | 0,00007 | NM_178428         | GPRA      |
| 8037614 | -1,14 | -2,20 | 0,03008 | -0,57 | -1,48  | 0,04015 | NM_005282         | ---       |
| 7902474 | -1,14 | -2,20 | 0,25284 | -1,12 | -2,17  | 0,00013 | --- C6orf123      | ---       |
| 8130811 | -1,14 | -2,20 | 0,06410 | -1,38 | -2,60  | 0,01230 | AB016901 C6orf123 | ---       |
| 8130982 | -1,14 | -2,20 | 0,06410 | -1,38 | -2,60  | 0,01230 | AB016901 OR2T4    | ---       |
| 7911273 | -1,14 | -2,20 | 0,01854 | -1,12 | -2,18  | 0,00582 | NM_001004696      | OR5K3     |
| 8081208 | -1,14 | -2,20 | 0,05137 | -1,21 | -2,31  | 0,03342 | NM_001005516      | GPX2      |
| 7979658 | -1,14 | -2,20 | 0,02994 | 0,53  | 1,44   | 0,35100 | NM_002083         | PNO1      |
| 8052719 | -1,14 | -2,20 | 0,03273 | -1,82 | -3,54  | 0,04738 | NM_020143         | ---       |
| 7960898 | -1,14 | -2,20 | 0,37769 | -3,23 | -9,41  | 0,00002 | --- ACP5          | ---       |
| 8034304 | -1,14 | -2,20 | 0,00135 | -1,29 | -2,45  | 0,01240 | NM_001111035      | C1orf192  |
| 7921862 | -1,14 | -2,20 | 0,03739 | -1,28 | -2,43  | 0,00173 | NM_001013625      | NFKBIL2   |



|         |       |       |         |       |       |         |                 |             |
|---------|-------|-------|---------|-------|-------|---------|-----------------|-------------|
| 8153790 | -1,14 | -2,20 | 0,07171 | -1,02 | -2,02 | 0,00254 | NM_013432       | APOA1       |
| 8077185 | -1,14 | -2,20 | 0,05367 | -1,50 | -2,82 | 0,00025 | NM_000039       | RBMY1B      |
| 8176753 | -1,14 | -2,20 | 0,03040 | -1,25 | -2,37 | 0,02380 | NM_001006121    | RBMY1B      |
| 8177290 | -1,14 | -2,20 | 0,03040 | -1,25 | -2,37 | 0,02380 | NM_001006121    | ---         |
| 7922125 | -1,14 | -2,20 | 0,06782 | -1,29 | -2,45 | 0,03179 | ---             | SNORD3A     |
| 8005547 | -1,14 | -2,20 | 0,27591 | -1,05 | -2,06 | 0,02146 | NR_006880       | SNORD3A     |
| 8005553 | -1,14 | -2,20 | 0,27591 | -1,05 | -2,06 | 0,02146 | NR_006880       | SNORD3A     |
| 8013323 | -1,14 | -2,20 | 0,27591 | -1,05 | -2,06 | 0,02146 | NR_006880       | SNORD3A     |
| 8013325 | -1,14 | -2,20 | 0,27591 | -1,05 | -2,06 | 0,02146 | NR_006880       | SNORD3A     |
| 8013329 | -1,14 | -2,20 | 0,27591 | -1,05 | -2,06 | 0,02146 | NR_006880       | C6orf201    |
| 8116696 | -1,14 | -2,20 | 0,00219 | -1,49 | -2,81 | 0,00200 | NM_001085401    | ---         |
| 8086797 | -1,14 | -2,20 | 0,11285 | -1,50 | -2,82 | 0,03012 | ---             | FOXL2       |
| 8091032 | -1,14 | -2,20 | 0,03800 | -1,21 | -2,31 | 0,01318 | NM_023067       | ---         |
| 8140857 | -1,14 | -2,20 | 0,01818 | -1,62 | -3,08 | 0,00186 | ---             | ---         |
| 8113699 | -1,14 | -2,20 | 0,11231 | -1,37 | -2,58 | 0,00049 | ---             | PDGFB       |
| 8076195 | -1,14 | -2,20 | 0,10388 | 0,46  | 1,38  | 0,51953 | NM_002608       | FRMD3       |
| 8161964 | -1,14 | -2,20 | 0,02547 | -1,37 | -2,59 | 0,01986 | NM_174938       | ---         |
| 8095299 | -1,14 | -2,20 | 0,40133 | -1,68 | -3,20 | 0,03189 | ---             | NKPD1       |
| 8037502 | -1,14 | -2,20 | 0,03853 | -1,50 | -2,83 | 0,02810 | ENST00000317951 | BEAN        |
| 7996281 | -1,14 | -2,20 | 0,05496 | 1,40  | 2,64  | 0,00253 | NM_001178020    | C6          |
| 8111864 | -1,14 | -2,20 | 0,01356 | -1,41 | -2,65 | 0,06199 | NM_001115131    | LIPN        |
| 7928999 | -1,14 | -2,20 | 0,10971 | -0,91 | -1,87 | 0,07427 | NM_001102469    | FLJ35220    |
| 8010499 | -1,14 | -2,20 | 0,01197 | -0,78 | -1,71 | 0,18993 | NM_173627       | SH3RF2      |
| 8108912 | -1,14 | -2,20 | 0,00170 | -0,05 | -1,04 | 0,81511 | NM_152550       | SNORD115-41 |
| 7982088 | -1,14 | -2,20 | 0,04202 | -2,06 | -4,16 | 0,00951 | NR_003356       | AIM2        |
| 7921434 | -1,14 | -2,20 | 0,07409 | -1,41 | -2,66 | 0,00702 | NM_004833       | PRKACG      |
| 8161615 | -1,14 | -2,20 | 0,00333 | -1,82 | -3,54 | 0,00307 | NM_002732       | MAF         |
| 8002969 | -1,14 | -2,20 | 0,01483 | -1,55 | -2,93 | 0,00120 | NM_001031804    | ---         |
| 8113467 | -1,14 | -2,20 | 0,04404 | -1,13 | -2,18 | 0,03424 | ---             | C11orf45    |
| 7952626 | -1,14 | -2,20 | 0,00076 | 0,06  | 1,05  | 0,68764 | NM_145013       | KIAA0664P3  |
| 7995242 | -1,14 | -2,20 | 0,02440 | 0,34  | 1,27  | 0,43443 | BC021555        | ---         |
| 8024882 | -1,14 | -2,20 | 0,03338 | -1,25 | -2,37 | 0,00384 | ---             | ---         |
| 8085056 | -1,14 | -2,21 | 0,06548 | -1,48 | -2,80 | 0,03460 | ---             | SNORD116-12 |
| 7981972 | -1,14 | -2,21 | 0,00684 | -0,81 | -1,75 | 0,00014 | NR_003327       | ---         |
| 8065082 | -1,14 | -2,21 | 0,06584 | -1,15 | -2,21 | 0,01686 | ---             | ---         |
| 7950292 | -1,14 | -2,21 | 0,00610 | -1,27 | -2,42 | 0,00045 | ---             | SCNN1A      |
| 7960529 | -1,14 | -2,21 | 0,03264 | 2,00  | 4,00  | 0,00217 | NM_001038       | OR2J2       |
| 8117716 | -1,14 | -2,21 | 0,09544 | -1,94 | -3,83 | 0,00127 | NM_030905       | OR2J2       |
| 8177696 | -1,14 | -2,21 | 0,09544 | -1,94 | -3,83 | 0,00127 | NM_030905       | RAVER1      |
| 8033969 | -1,14 | -2,21 | 0,05784 | -0,81 | -1,75 | 0,15101 | NM_133452       | GRK4        |
| 8093665 | -1,14 | -2,21 | 0,00004 | -0,69 | -1,61 | 0,01308 | NM_182982       | CBLN4       |
| 8067157 | -1,14 | -2,21 | 0,05771 | -1,52 | -2,87 | 0,00001 | NM_080617       | AQP12A      |
| 8060126 | -1,14 | -2,21 | 0,10983 | -1,83 | -3,57 | 0,00090 | NM_198998       | FAM92A3     |
| 8098465 | -1,14 | -2,21 | 0,00782 | -1,08 | -2,11 | 0,00661 | NR_003612       | OR7E91P     |
| 8042568 | -1,14 | -2,21 | 0,10127 | -1,73 | -3,33 | 0,01462 | NR_002185       | MYO1H       |
| 7958524 | -1,14 | -2,21 | 0,00277 | -0,79 | -1,73 | 0,13276 | NM_001101421    | ---         |
| 8078225 | -1,14 | -2,21 | 0,16089 | -0,63 | -1,55 | 0,05399 | ---             | STRA8       |
| 8136391 | -1,14 | -2,21 | 0,02538 | -1,15 | -2,22 | 0,00081 | NM_182489       | ONECUT1     |
| 7988987 | -1,14 | -2,21 | 0,06294 | -0,75 | -1,68 | 0,24660 | NM_004498       | DHDH        |
| 8030148 | -1,14 | -2,21 | 0,00343 | -0,10 | -1,07 | 0,71992 | NM_014475       | FLJ46365    |
| 8146388 | -1,14 | -2,21 | 0,05683 | -0,91 | -1,88 | 0,04663 | AK128232        | ---         |
| 8022020 | -1,14 | -2,21 | 0,00303 | -1,53 | -2,89 | 0,01437 | ---             | ---         |
| 8079149 | -1,14 | -2,21 | 0,02738 | -0,98 | -1,97 | 0,04852 | ---             | ZMYND15     |
| 8003926 | -1,14 | -2,21 | 0,02935 | -1,42 | -2,67 | 0,01611 | NM_001136046    | SLAMF7      |
| 7906613 | -1,14 | -2,21 | 0,00223 | 0,37  | 1,29  | 0,12949 | NM_021181       | AKAP3       |
| 7960427 | -1,14 | -2,21 | 0,00041 | -0,36 | -1,28 | 0,26394 | NM_006422       | ---         |
| 7933976 | -1,14 | -2,21 | 0,21545 | -1,84 | -3,58 | 0,03005 | ---             | ---         |
| 8062555 | -1,14 | -2,21 | 0,10625 | -1,01 | -2,01 | 0,06974 | ---             | MS4A15      |
| 7940333 | -1,14 | -2,21 | 0,03414 | -0,40 | -1,32 | 0,34306 | NM_001098835    | BTBD8       |
| 7902965 | -1,14 | -2,21 | 0,08394 | -0,47 | -1,38 | 0,06744 | NM_183242       | OR4F17      |
| 7896740 | -1,14 | -2,21 | 0,19631 | -1,43 | -2,69 | 0,00520 | NM_001005240    | OR4F17      |
| 7991663 | -1,14 | -2,21 | 0,19631 | -1,43 | -2,69 | 0,00520 | NM_001005240    | OR4F17      |
| 8023937 | -1,14 | -2,21 | 0,19631 | -1,43 | -2,69 | 0,00520 | NM_001005240    | SLAMF1      |
| 7921652 | -1,14 | -2,21 | 0,03551 | -1,53 | -2,90 | 0,00056 | NM_003037       | ---         |
| 8046199 | -1,14 | -2,21 | 0,04883 | -0,82 | -1,77 | 0,00768 | ---             | ---         |
| 7971122 | -1,14 | -2,21 | 0,00339 | -2,26 | -4,78 | 0,00099 | ---             | ---         |
| 8002342 | -1,14 | -2,21 | 0,05906 | -2,10 | -4,29 | 0,00001 | ---             | RAET1E      |
| 8130151 | -1,14 | -2,21 | 0,01759 | -0,80 | -1,74 | 0,00303 | NM_139165       | DCAF8L1     |
| 8171885 | -1,14 | -2,21 | 0,00378 | -0,94 | -1,92 | 0,00152 | NM_001017930    | OR51A2      |
| 7946017 | -1,14 | -2,21 | 0,02699 | -1,04 | -2,05 | 0,00503 | NM_001004748    | ---         |
| 8088772 | -1,14 | -2,21 | 0,01762 | -0,34 | -1,26 | 0,44782 | ---             | ---         |
| 7914994 | -1,14 | -2,21 | 0,03348 | -1,08 | -2,11 | 0,02843 | ---             | LRRC4       |
| 8142765 | -1,14 | -2,21 | 0,01775 | -0,95 | -1,93 | 0,00700 | NM_022143       | CYP4A22     |

|         |       |       |         |       |       |         |                 |              |
|---------|-------|-------|---------|-------|-------|---------|-----------------|--------------|
| 7901293 | -1,14 | -2,21 | 0,27226 | -1,49 | -2,80 | 0,02575 | NM_001010969    | KCTD15       |
| 8027584 | -1,14 | -2,21 | 0,11583 | -0,39 | -1,31 | 0,54554 | NM_024076       | PTPN3        |
| 8163149 | -1,14 | -2,21 | 0,00470 | 3,39  | 10,49 | 0,00003 | NM_002829       | SULT1C3      |
| 8044204 | -1,14 | -2,21 | 0,04094 | -1,19 | -2,28 | 0,01337 | NM_001008743    | SAMD10       |
| 8067792 | -1,14 | -2,21 | 0,10099 | 0,63  | 1,55  | 0,06904 | NM_080621       | GRK1         |
| 7970325 | -1,14 | -2,21 | 0,00306 | -1,10 | -2,14 | 0,00958 | NM_002929       | HOXC9        |
| 7955865 | -1,14 | -2,21 | 0,00758 | -0,87 | -1,83 | 0,06688 | NM_006897       | LOC158572    |
| 8172654 | -1,14 | -2,21 | 0,06022 | -1,31 | -2,48 | 0,03305 | NR_026742       | OR56A1       |
| 7946119 | -1,14 | -2,21 | 0,01285 | -0,94 | -1,92 | 0,00808 | NM_001001917    | TKTL1        |
| 8170834 | -1,14 | -2,21 | 0,01301 | -0,66 | -1,58 | 0,01090 | NM_012253       | USP17        |
| 8094122 | -1,14 | -2,21 | 0,51681 | -3,23 | -9,38 | 0,00028 | NM_001105662    | OR52K1       |
| 7937942 | -1,14 | -2,21 | 0,16033 | -1,58 | -2,99 | 0,09363 | NM_001005171    | MTHFR        |
| 7897753 | -1,15 | -2,21 | 0,07183 | -1,19 | -2,29 | 0,02313 | ENST00000376592 | SPDYE8P      |
| 8133582 | -1,15 | -2,21 | 0,23452 | -2,52 | -5,74 | 0,00168 | NR_003664       | SPRR2D       |
| 7920196 | -1,15 | -2,21 | 0,00264 | -1,27 | -2,41 | 0,04699 | NM_006945       | FZD3         |
| 8145611 | -1,15 | -2,21 | 0,00528 | 3,37  | 10,31 | 0,00066 | NM_017412       | ZBTB7B       |
| 7905854 | -1,15 | -2,21 | 0,08461 | -0,58 | -1,49 | 0,05721 | NM_015872       | ---          |
| 8063347 | -1,15 | -2,21 | 0,04615 | -1,30 | -2,46 | 0,04159 | ---             | CETN1        |
| 8019828 | -1,15 | -2,21 | 0,11345 | -1,14 | -2,21 | 0,03970 | NM_004066       | MEOX2        |
| 8138353 | -1,15 | -2,21 | 0,01322 | -1,99 | -3,97 | 0,00043 | NM_005924       | DNTT         |
| 7929574 | -1,15 | -2,21 | 0,04040 | -0,72 | -1,65 | 0,08243 | NM_004088       | ---          |
| 8166609 | -1,15 | -2,21 | 0,01378 | -1,13 | -2,19 | 0,00380 | ---             | IFNA21       |
| 8160371 | -1,15 | -2,21 | 0,00753 | -1,31 | -2,48 | 0,04284 | NM_002175       | ACCN4        |
| 8048611 | -1,15 | -2,21 | 0,00248 | -0,86 | -1,82 | 0,01492 | NM_018674       | ---          |
| 8083852 | -1,15 | -2,21 | 0,00731 | -1,37 | -2,58 | 0,00139 | ---             | ARTN         |
| 7900878 | -1,15 | -2,21 | 0,01062 | -0,84 | -1,79 | 0,13393 | NM_057091       | VDAC2        |
| 7928524 | -1,15 | -2,21 | 0,04151 | -1,21 | -2,32 | 0,04274 | NM_003375       | ACADL        |
| 8058591 | -1,15 | -2,21 | 0,05546 | -1,30 | -2,46 | 0,01916 | NM_001608       | DACH1        |
| 7971950 | -1,15 | -2,21 | 0,00087 | -0,76 | -1,69 | 0,00009 | NM_080759       | GUCY2D       |
| 8004763 | -1,15 | -2,21 | 0,07811 | -1,55 | -2,92 | 0,01665 | NM_000180       | AVP          |
| 8064575 | -1,15 | -2,21 | 0,13342 | -1,64 | -3,11 | 0,00014 | NM_000490       | PRAMEF5      |
| 7898007 | -1,15 | -2,22 | 0,13792 | -0,94 | -1,91 | 0,00898 | NM_001013407    | PRAMEF5      |
| 7912575 | -1,15 | -2,22 | 0,13792 | -0,94 | -1,91 | 0,00898 | NM_001013407    | HS3ST6       |
| 7998634 | -1,15 | -2,22 | 0,11123 | -1,47 | -2,78 | 0,01714 | NM_001009606    | SYNPO        |
| 8109305 | -1,15 | -2,22 | 0,04235 | -0,24 | -1,18 | 0,52029 | NM_007286       | CSHL1        |
| 8017499 | -1,15 | -2,22 | 0,11166 | -1,94 | -3,85 | 0,00896 | NM_022579       | MTNR1B       |
| 7943098 | -1,15 | -2,22 | 0,05900 | -1,20 | -2,30 | 0,06135 | NM_005959       | ---          |
| 7971484 | -1,15 | -2,22 | 0,01184 | -1,70 | -3,26 | 0,00342 | ---             | MAP1LC3C     |
| 7925504 | -1,15 | -2,22 | 0,14956 | -1,41 | -2,66 | 0,00906 | NM_001004343    | NUDT8        |
| 7949857 | -1,15 | -2,22 | 0,01116 | -0,11 | -1,08 | 0,84861 | NM_181843       | FER1L5       |
| 8043639 | -1,15 | -2,22 | 0,02625 | -1,06 | -2,08 | 0,05383 | NM_001077400    | ---          |
| 8090674 | -1,15 | -2,22 | 0,07547 | -0,99 | -1,99 | 0,00465 | ---             | KCNA6        |
| 7953264 | -1,15 | -2,22 | 0,06502 | -1,00 | -2,01 | 0,06711 | NM_002235       | CD1E         |
| 7906355 | -1,15 | -2,22 | 0,03953 | -2,36 | -5,13 | 0,00819 | NM_030893       | FBXO17       |
| 8036676 | -1,15 | -2,22 | 0,00709 | 2,08  | 4,22  | 0,03652 | NM_024907       | FAM22G       |
| 8156620 | -1,15 | -2,22 | 0,02229 | -1,47 | -2,77 | 0,04562 | NM_001170741    | ANKS3        |
| 7999177 | -1,15 | -2,22 | 0,01838 | -1,25 | -2,38 | 0,04692 | NM_133450       | OR9G4        |
| 7948157 | -1,15 | -2,22 | 0,03343 | -1,76 | -3,38 | 0,01608 | NM_001005284    | ---          |
| 8028789 | -1,15 | -2,22 | 0,00027 | -0,86 | -1,81 | 0,00767 | ---             | ITGAD        |
| 7995161 | -1,15 | -2,22 | 0,06175 | -1,01 | -2,01 | 0,03027 | NM_005353       | ---          |
| 8042513 | -1,15 | -2,22 | 0,20578 | -1,74 | -3,33 | 0,04557 | ---             | SYT5         |
| 8039378 | -1,15 | -2,22 | 0,12143 | -1,67 | -3,18 | 0,01080 | NM_003180       | ARL14        |
| 8083743 | -1,15 | -2,22 | 0,01949 | -0,43 | -1,34 | 0,38765 | NM_025047       | PVALB        |
| 8075838 | -1,15 | -2,22 | 0,08241 | -1,60 | -3,04 | 0,00744 | NM_002854       | ---          |
| 8076329 | -1,15 | -2,22 | 0,24833 | -1,14 | -2,20 | 0,03059 | ---             | ---          |
| 8129943 | -1,15 | -2,22 | 0,05780 | -0,58 | -1,50 | 0,05203 | ---             | ---          |
| 8160555 | -1,15 | -2,22 | 0,00638 | -1,06 | -2,08 | 0,00354 | ---             | ---          |
| 8119078 | -1,15 | -2,22 | 0,01641 | -1,37 | -2,58 | 0,00126 | ---             | ---          |
| 8067867 | -1,15 | -2,22 | 0,17496 | -1,54 | -2,90 | 0,00130 | ---             | C1orf187     |
| 7897737 | -1,15 | -2,22 | 0,11567 | -0,92 | -1,89 | 0,12996 | NM_198545       | FKBP6        |
| 8140291 | -1,15 | -2,22 | 0,13868 | -1,89 | -3,70 | 0,00084 | NM_003602       | OR51B6       |
| 7937996 | -1,15 | -2,22 | 0,00688 | -1,46 | -2,76 | 0,01246 | NM_001004750    | ---          |
| 7902685 | -1,15 | -2,22 | 0,01462 | -1,12 | -2,18 | 0,04259 | ---             | TGIF2LY      |
| 8176397 | -1,15 | -2,22 | 0,04633 | -1,58 | -2,99 | 0,01558 | NM_139214       | ---          |
| 8124920 | -1,15 | -2,22 | 0,08022 | -2,51 | -5,71 | 0,00611 | ---             | LOC442293    |
| 8139015 | -1,15 | -2,22 | 0,00860 | -0,55 | -1,46 | 0,02766 | NR_033246       | OR2AT4       |
| 7950471 | -1,15 | -2,22 | 0,08646 | -1,86 | -3,63 | 0,00735 | NM_001005285    | LOC100128653 |
| 8137781 | -1,15 | -2,22 | 0,09903 | -1,27 | -2,41 | 0,03733 | ENST00000443349 | ADAT3        |
| 8024356 | -1,15 | -2,22 | 0,13024 | -0,04 | -1,02 | 0,94692 | NM_138422       | C15orf60     |
| 7984736 | -1,15 | -2,22 | 0,00731 | -0,77 | -1,70 | 0,10784 | NM_001042367    | PYROXD2      |
| 7935572 | -1,15 | -2,22 | 0,01128 | -0,93 | -1,91 | 0,03690 | NM_032709       | FCER1A       |
| 7906443 | -1,15 | -2,22 | 0,00211 | -1,53 | -2,89 | 0,00704 | NM_002001       | SRPK3        |
| 8170753 | -1,15 | -2,22 | 0,01914 | -1,22 | -2,33 | 0,00771 | NM_014370       | REG1P        |

|         |       |       |         |       |       |         |                        |                |
|---------|-------|-------|---------|-------|-------|---------|------------------------|----------------|
| 8053337 | -1,15 | -2,22 | 0,05408 | -1,36 | -2,57 | 0,00447 | NR_002714              | ZNF818P        |
| 8030969 | -1,15 | -2,22 | 0,05236 | -1,67 | -3,19 | 0,00001 | ENST00000344759        | C2orf50        |
| 8040270 | -1,15 | -2,22 | 0,01416 | -0,94 | -1,91 | 0,01834 | NM_182500              | HOXD4          |
| 8046555 | -1,15 | -2,22 | 0,10688 | -1,84 | -3,58 | 0,01424 | NM_014621              | PTPRO          |
| 7954143 | -1,15 | -2,22 | 0,00321 | -0,81 | -1,75 | 0,01166 | NM_030667              | ---            |
| 8147689 | -1,15 | -2,22 | 0,01641 | -1,10 | -2,15 | 0,13000 | ---                    | C14orf162      |
| 7979870 | -1,15 | -2,22 | 0,09908 | -1,70 | -3,26 | 0,01099 | NR_024630              | ADAM6 // ADAM6 |
| 7986629 | -1,15 | -2,22 | 0,03657 | -2,00 | -4,01 | 0,00445 | NR_002224 // NR_002224 | LMOD3          |
| 8088739 | -1,15 | -2,22 | 0,01171 | -0,93 | -1,91 | 0,02578 | NM_198271              | ALG1L          |
| 8090291 | -1,15 | -2,22 | 0,17952 | 2,20  | 4,60  | 0,00810 | NM_001015050           | GJB5           |
| 7899921 | -1,15 | -2,22 | 0,00257 | -1,09 | -2,13 | 0,06295 | NM_005268              | HIST1H3C       |
| 8117339 | -1,15 | -2,22 | 0,04932 | -1,46 | -2,75 | 0,00005 | NM_003531              | LCN15          |
| 8165298 | -1,15 | -2,22 | 0,00680 | -1,87 | -3,66 | 0,01166 | NM_203347              | DEF6           |
| 8118932 | -1,15 | -2,22 | 0,02244 | -1,52 | -2,88 | 0,00456 | NM_022047              | SLC25A42       |
| 8027128 | -1,15 | -2,22 | 0,02756 | -0,70 | -1,62 | 0,07292 | NM_178526              | WTIP           |
| 8027665 | -1,15 | -2,22 | 0,06377 | -1,09 | -2,13 | 0,06219 | NM_001080436           | ---            |
| 7964577 | -1,15 | -2,22 | 0,04075 | -0,78 | -1,72 | 0,10831 | ---                    | SPC24          |
| 8034122 | -1,15 | -2,22 | 0,04885 | -0,16 | -1,12 | 0,67889 | NM_182513              | ---            |
| 8097476 | -1,15 | -2,23 | 0,07665 | -1,10 | -2,14 | 0,00044 | ---                    | ---            |
| 8067858 | -1,15 | -2,23 | 0,00194 | -0,56 | -1,47 | 0,13576 | ---                    | BTNL2          |
| 8125426 | -1,15 | -2,23 | 0,13317 | -1,60 | -3,04 | 0,00615 | NM_019602              | BTNL2          |
| 8178795 | -1,15 | -2,23 | 0,13317 | -1,60 | -3,04 | 0,00615 | NM_019602              | BTNL2          |
| 8179996 | -1,15 | -2,23 | 0,13317 | -1,60 | -3,04 | 0,00615 | NM_019602              | LOC100292301   |
| 8102781 | -1,15 | -2,23 | 0,08956 | -0,68 | -1,61 | 0,09128 | ENST00000330122        | TMPRSS11B      |
| 8100701 | -1,15 | -2,23 | 0,00792 | -0,87 | -1,82 | 0,00036 | NM_182502              | RPL21P44       |
| 8100378 | -1,15 | -2,23 | 0,04240 | -0,79 | -1,73 | 0,00763 | NR_027153              | FAM36A         |
| 7925561 | -1,16 | -2,23 | 0,07480 | -0,18 | -1,13 | 0,55991 | NM_198076              | OVOS2          |
| 7962139 | -1,16 | -2,23 | 0,00492 | -0,29 | -1,23 | 0,13221 | ENST00000266524        | ---            |
| 8009491 | -1,16 | -2,23 | 0,02015 | -1,57 | -2,96 | 0,00902 | ---                    | NLRP8          |
| 8031586 | -1,16 | -2,23 | 0,01216 | -1,30 | -2,45 | 0,00181 | NM_176811              | EPYC           |
| 7965390 | -1,16 | -2,23 | 0,06111 | -0,90 | -1,87 | 0,00585 | NM_004950              | ---            |
| 7969531 | -1,16 | -2,23 | 0,05352 | -0,85 | -1,80 | 0,03615 | ---                    | VWDE           |
| 8138277 | -1,16 | -2,23 | 0,10417 | 0,47  | 1,38  | 0,34748 | NM_001135924           | CTSW           |
| 7941444 | -1,16 | -2,23 | 0,06182 | -1,16 | -2,24 | 0,00504 | NM_001335              | ---            |
| 8148309 | -1,16 | -2,23 | 0,07419 | -1,11 | -2,16 | 0,00831 | ---                    | LOC440419      |
| 8005777 | -1,16 | -2,23 | 0,00680 | -1,01 | -2,02 | 0,03220 | BC112354 PTMS          | ---            |
| 7953409 | -1,16 | -2,23 | 0,04893 | 0,32  | 1,25  | 0,30647 | NM_002824              | CEACAM7        |
| 8037053 | -1,16 | -2,23 | 0,03091 | -1,31 | -2,48 | 0,03540 | NM_006890              | ADAMTSL5       |
| 8032249 | -1,16 | -2,23 | 0,12110 | 0,56  | 1,48  | 0,38282 | NM_213604              | ---            |
| 7936492 | -1,16 | -2,23 | 0,05786 | -1,71 | -3,27 | 0,01981 | ---                    | NCRNA00174     |
| 8139873 | -1,16 | -2,23 | 0,01149 | -0,44 | -1,36 | 0,58072 | NR_026873              | ---            |
| 8100599 | -1,16 | -2,23 | 0,01506 | -2,24 | -4,73 | 0,02365 | ---                    | C7orf63        |
| 8134051 | -1,16 | -2,23 | 0,00329 | -1,19 | -2,28 | 0,07086 | NM_001039706           | CSTT           |
| 8061396 | -1,16 | -2,23 | 0,04789 | -1,15 | -2,22 | 0,02583 | NR_001279              | ---            |
| 8044731 | -1,16 | -2,23 | 0,02457 | -1,60 | -3,03 | 0,03897 | ---                    | ---            |
| 8104723 | -1,16 | -2,23 | 0,01525 | -1,48 | -2,79 | 0,00244 | ---                    | LAPTM5         |
| 7914270 | -1,16 | -2,23 | 0,03877 | -0,87 | -1,83 | 0,03612 | NM_006762              | C19orf39       |
| 8025888 | -1,16 | -2,23 | 0,10345 | -0,32 | -1,25 | 0,42773 | NM_175871              | GUCA1A         |
| 8119515 | -1,16 | -2,23 | 0,03968 | -1,10 | -2,14 | 0,00271 | NM_000409              | UMODL1         |
| 8068740 | -1,16 | -2,23 | 0,00993 | -0,14 | -1,10 | 0,69234 | NM_001004416           | ---            |
| 8089436 | -1,16 | -2,23 | 0,00608 | -0,74 | -1,68 | 0,05876 | ---                    | NDUFA4L2       |
| 7964388 | -1,16 | -2,23 | 0,02966 | -1,29 | -2,44 | 0,00237 | NM_020142              | FFAR3          |
| 8027856 | -1,16 | -2,23 | 0,00140 | -1,24 | -2,36 | 0,02915 | NM_005304              | WWC1           |
| 8109773 | -1,16 | -2,23 | 0,00749 | 2,74  | 6,69  | 0,00045 | NM_001161661           | FAM182A        |
| 8065527 | -1,16 | -2,23 | 0,24630 | -2,19 | -4,55 | 0,00011 | NR_026713              | CHD9           |
| 8001402 | -1,16 | -2,23 | 0,02314 | -1,19 | -2,28 | 0,04119 | NM_025134              | ---            |
| 7923810 | -1,16 | -2,23 | 0,02196 | -1,21 | -2,32 | 0,00022 | ---                    | ---            |
| 8025996 | -1,16 | -2,23 | 0,00191 | -1,05 | -2,07 | 0,03052 | ---                    | CHAF1A         |
| 8024843 | -1,16 | -2,23 | 0,01310 | 0,28  | 1,22  | 0,28292 | NM_005483              | ---            |
| 8122405 | -1,16 | -2,23 | 0,00571 | -1,01 | -2,01 | 0,17803 | ---                    | LFNG           |
| 8131143 | -1,16 | -2,23 | 0,02390 | -1,16 | -2,24 | 0,00867 | NM_001040167           | LEMD2          |
| 8125788 | -1,16 | -2,23 | 0,16283 | 1,36  | 2,56  | 0,07111 | NM_181336              | PILRA          |
| 8134814 | -1,16 | -2,23 | 0,09550 | -1,37 | -2,58 | 0,06078 | NM_013439              | SSTR2          |
| 8009526 | -1,16 | -2,23 | 0,04313 | -0,86 | -1,81 | 0,00558 | NM_001050              | SPEF1          |
| 8064751 | -1,16 | -2,23 | 0,07135 | -1,93 | -3,82 | 0,00522 | NM_015417              | IFRD2          |
| 8079988 | -1,16 | -2,23 | 0,01530 | -1,81 | -3,52 | 0,00036 | NM_006764              | SCGB1A1        |
| 7940654 | -1,16 | -2,23 | 0,02866 | -1,28 | -2,43 | 0,04024 | NM_003357              | LOC399900      |
| 7940598 | -1,16 | -2,23 | 0,07407 | -0,96 | -1,95 | 0,02155 | AK093779 CCDC27        | ---            |
| 7897196 | -1,16 | -2,23 | 0,02608 | -0,77 | -1,70 | 0,00259 | NM_152492              | TMEM68         |
| 8146480 | -1,16 | -2,23 | 0,03640 | -1,67 | -3,17 | 0,02742 | BC043417               | ---            |
| 7916926 | -1,16 | -2,24 | 0,01431 | -0,88 | -1,84 | 0,00002 | ---                    | ---            |
| 7902265 | -1,16 | -2,24 | 0,03335 | -1,13 | -2,19 | 0,03303 | ---                    | LGALS16        |
| 8028742 | -1,16 | -2,24 | 0,05771 | -1,43 | -2,70 | 0,00808 | FJ613352 GAFA2         | ---            |

|         |       |       |         |       |       |         |                 |              |
|---------|-------|-------|---------|-------|-------|---------|-----------------|--------------|
| 8003056 | -1,16 | -2,24 | 0,01834 | -1,63 | -3,09 | 0,00160 | AF220234        | TCP10L       |
| 8069991 | -1,16 | -2,24 | 0,07681 | -1,21 | -2,31 | 0,05543 | NM_144659       | ANKRD53      |
| 8042558 | -1,16 | -2,24 | 0,02695 | -0,83 | -1,78 | 0,00966 | NM_024933       | C10orf41     |
| 7928531 | -1,16 | -2,24 | 0,07911 | -2,59 | -6,02 | 0,00487 | NR_024421       | FBP2         |
| 8162492 | -1,16 | -2,24 | 0,01206 | -1,90 | -3,73 | 0,00427 | NM_003837       | PLAC4        |
| 8070458 | -1,16 | -2,24 | 0,01359 | -2,06 | -4,16 | 0,00507 | NM_182832       | HES6         |
| 8059989 | -1,16 | -2,24 | 0,06394 | -1,47 | -2,78 | 0,00456 | NM_018645       | C22orf27     |
| 8072400 | -1,16 | -2,24 | 0,00680 | -1,00 | -2,01 | 0,09021 | NR_026920       | ---          |
| 8143294 | -1,16 | -2,24 | 0,01158 | -1,57 | -2,97 | 0,02809 | ---             | ---          |
| 7925753 | -1,16 | -2,24 | 0,10576 | -1,44 | -2,71 | 0,02240 | ---             | ---          |
| 7932635 | -1,16 | -2,24 | 0,08742 | -1,21 | -2,31 | 0,02724 | ---             | ---          |
| 7934269 | -1,16 | -2,24 | 0,11203 | -1,95 | -3,86 | 0,04395 | ---             | ATP6V0E2     |
| 8143759 | -1,16 | -2,24 | 0,00085 | -0,46 | -1,38 | 0,13952 | NM_145230       | DCAF4L2      |
| 8151679 | -1,16 | -2,24 | 0,04591 | -1,59 | -3,02 | 0,00099 | NM_152418       | TSSK4        |
| 7973652 | -1,16 | -2,24 | 0,02033 | -2,05 | -4,14 | 0,00877 | NM_174944       | HECW1        |
| 8132465 | -1,16 | -2,24 | 0,05118 | -0,10 | -1,08 | 0,74160 | NM_015052       | ---          |
| 8156844 | -1,16 | -2,24 | 0,02356 | -1,07 | -2,10 | 0,00744 | ---             | ---          |
| 8121136 | -1,16 | -2,24 | 0,05180 | -1,27 | -2,42 | 0,00080 | ---             | KBTBD5       |
| 8079107 | -1,16 | -2,24 | 0,07739 | -1,57 | -2,96 | 0,00120 | NM_152393       | ---          |
| 7975410 | -1,16 | -2,24 | 0,03482 | -1,76 | -3,39 | 0,05430 | ---             | ZNF862       |
| 8137202 | -1,16 | -2,24 | 0,00998 | -0,50 | -1,41 | 0,04436 | NM_001099220    | OR51D1       |
| 7937950 | -1,16 | -2,24 | 0,09565 | -1,46 | -2,75 | 0,00025 | NM_001004751    | CD300E       |
| 8018189 | -1,16 | -2,24 | 0,13697 | -1,90 | -3,72 | 0,00004 | NM_181449       | ---          |
| 8163614 | -1,16 | -2,24 | 0,00448 | -1,41 | -2,67 | 0,01357 | ---             | APBA3        |
| 8032670 | -1,16 | -2,24 | 0,05245 | -0,16 | -1,12 | 0,74038 | NM_004886       | ---          |
| 7934706 | -1,16 | -2,24 | 0,16987 | -1,35 | -2,54 | 0,00581 | ---             | ---          |
| 7934717 | -1,16 | -2,24 | 0,16987 | -1,35 | -2,54 | 0,00581 | ---             | ASTN2        |
| 8163678 | -1,16 | -2,24 | 0,08572 | -0,76 | -1,70 | 0,04787 | NM_198186       | CXorf67      |
| 8167650 | -1,16 | -2,24 | 0,00531 | -1,71 | -3,27 | 0,00620 | BC046248        | ZNF581       |
| 8031522 | -1,17 | -2,24 | 0,01155 | -0,42 | -1,34 | 0,43659 | NM_016535       | ANKRD56      |
| 8101207 | -1,17 | -2,24 | 0,05635 | -0,22 | -1,17 | 0,36610 | NM_001029870    | P2RY1        |
| 8083447 | -1,17 | -2,24 | 0,01494 | -0,87 | -1,83 | 0,03150 | NM_002563       | C1orf109     |
| 7915045 | -1,17 | -2,24 | 0,00992 | 0,62  | 1,53  | 0,00840 | BC018109        | NPBWR1       |
| 8146429 | -1,17 | -2,24 | 0,01576 | -2,46 | -5,49 | 0,00003 | NM_005285       | D2HGDH       |
| 8049919 | -1,17 | -2,24 | 0,01422 | -0,70 | -1,63 | 0,15822 | NM_152783       | ---          |
| 8172195 | -1,17 | -2,24 | 0,37350 | -2,33 | -5,04 | 0,00087 | ---             | LOC401097    |
| 8091735 | -1,17 | -2,24 | 0,10698 | -1,25 | -2,37 | 0,00405 | NM_001168214    | ---          |
| 7990452 | -1,17 | -2,24 | 0,24046 | -1,12 | -2,17 | 0,11966 | ---             | NTN5         |
| 8038139 | -1,17 | -2,24 | 0,04751 | -1,53 | -2,89 | 0,00248 | NM_145807       | ---          |
| 8079964 | -1,17 | -2,24 | 0,07372 | -1,01 | -2,02 | 0,00448 | ---             | NOS2         |
| 8013536 | -1,17 | -2,24 | 0,08228 | -0,75 | -1,68 | 0,05004 | NM_000625       | DKK3         |
| 7938481 | -1,17 | -2,24 | 0,15069 | -0,98 | -1,98 | 0,00480 | NM_015881       | LOC440742    |
| 7911045 | -1,17 | -2,24 | 0,04409 | -0,57 | -1,49 | 0,06627 | ENST00000452677 | KCNS2        |
| 8147566 | -1,17 | -2,24 | 0,00118 | -1,45 | -2,73 | 0,00329 | NM_020697       | ---          |
| 8098193 | -1,17 | -2,24 | 0,15051 | -0,17 | -1,12 | 0,34666 | ---             | SULT6B1      |
| 8051520 | -1,17 | -2,24 | 0,00768 | -1,28 | -2,43 | 0,00088 | NM_001032377    | RNASE1       |
| 7977615 | -1,17 | -2,24 | 0,03092 | -1,22 | -2,33 | 0,09193 | NM_198232       | SNORD101     |
| 8122142 | -1,17 | -2,24 | 0,08178 | -1,33 | -2,52 | 0,00005 | NR_002434       | ROS1         |
| 8129134 | -1,17 | -2,24 | 0,00756 | -0,72 | -1,65 | 0,00668 | NM_002944       | ACSM5        |
| 7993726 | -1,17 | -2,25 | 0,04680 | -1,37 | -2,58 | 0,04856 | NM_017888       | GLRA1        |
| 8115355 | -1,17 | -2,25 | 0,10322 | -2,09 | -4,25 | 0,01635 | NM_001146040    | VWA3A        |
| 7993898 | -1,17 | -2,25 | 0,05163 | -1,42 | -2,67 | 0,00243 | NM_173615       | AMBN         |
| 8095519 | -1,17 | -2,25 | 0,09267 | -1,53 | -2,88 | 0,00564 | NM_016519       | OR10K1       |
| 7906365 | -1,17 | -2,25 | 0,19294 | -2,93 | -7,60 | 0,00337 | NM_001004473    | PSG2         |
| 8037267 | -1,17 | -2,25 | 0,03929 | -0,77 | -1,70 | 0,16795 | NM_031246       | TCHH         |
| 7920141 | -1,17 | -2,25 | 0,00800 | -1,54 | -2,91 | 0,00121 | NM_007113       | CNIH2        |
| 7941587 | -1,17 | -2,25 | 0,01264 | -0,87 | -1,83 | 0,01909 | NM_182553       | ---          |
| 8046281 | -1,17 | -2,25 | 0,05000 | -0,91 | -1,88 | 0,00319 | ---             | SPDYE8P      |
| 8140445 | -1,17 | -2,25 | 0,23303 | -2,24 | -4,73 | 0,00127 | NR_003664       | GAL          |
| 7942064 | -1,17 | -2,25 | 0,00248 | 2,31  | 4,96  | 0,00014 | NM_015973       | ---          |
| 7978793 | -1,17 | -2,25 | 0,00040 | -0,90 | -1,87 | 0,02708 | ---             | GIMAP6       |
| 8143781 | -1,17 | -2,25 | 0,07148 | -0,97 | -1,96 | 0,00178 | NM_024711       | CACNA1F      |
| 8172580 | -1,17 | -2,25 | 0,02539 | -0,59 | -1,51 | 0,00121 | NM_005183       | ---          |
| 8127688 | -1,17 | -2,25 | 0,16472 | -1,06 | -2,09 | 0,00017 | ---             | ---          |
| 8050111 | -1,17 | -2,25 | 0,03150 | -0,59 | -1,51 | 0,00251 | ---             | OR2T6        |
| 7911276 | -1,17 | -2,25 | 0,02023 | -1,07 | -2,10 | 0,00016 | NM_001005471    | C9orf29      |
| 8163341 | -1,17 | -2,25 | 0,00372 | -0,92 | -1,89 | 0,06365 | BC031236        | ---          |
| 8051569 | -1,17 | -2,25 | 0,00411 | -1,28 | -2,43 | 0,02197 | ---             | LOC100131138 |
| 7958724 | -1,17 | -2,25 | 0,01599 | -1,22 | -2,32 | 0,00035 | ENST00000331096 | ---          |
| 7959012 | -1,17 | -2,25 | 0,02116 | -0,67 | -1,59 | 0,05575 | ---             | FLJ43315     |
| 8077198 | -1,17 | -2,25 | 0,12880 | -0,90 | -1,87 | 0,00186 | BC057848        | ---          |
| 8060625 | -1,17 | -2,25 | 0,01426 | -0,94 | -1,92 | 0,00102 | ---             | FAAH2        |
| 8167930 | -1,17 | -2,25 | 0,03478 | 0,40  | 1,32  | 0,35042 | NM_174912       | ---          |

|         |       |       |         |       |       |         |                 |            |  |
|---------|-------|-------|---------|-------|-------|---------|-----------------|------------|--|
| 8007503 | -1,17 | -2,25 | 0,00328 | -1,63 | -3,11 | 0,00317 | ---             | GOLGA6A    |  |
| 7984985 | -1,17 | -2,25 | 0,31607 | -0,67 | -1,59 | 0,46611 | NM_001038640    | C14orf56   |  |
| 7979957 | -1,17 | -2,25 | 0,01367 | -1,21 | -2,32 | 0,01741 | AK024445        | OCR1       |  |
| 7908861 | -1,17 | -2,25 | 0,02640 | -0,69 | -1,61 | 0,14160 | AF314543        | MYH1       |  |
| 8012726 | -1,17 | -2,25 | 0,01710 | -1,23 | -2,35 | 0,00815 | NM_005963       | ---        |  |
| 8084014 | -1,17 | -2,25 | 0,05910 | -1,38 | -2,61 | 0,00009 | ---             | SLIT1      |  |
| 7935361 | -1,17 | -2,25 | 0,02381 | -0,31 | -1,24 | 0,19411 | NM_003061       | EML3       |  |
| 7948718 | -1,17 | -2,25 | 0,01433 | 0,57  | 1,49  | 0,25675 | NM_153265       | HIST1H3F   |  |
| 8124437 | -1,17 | -2,25 | 0,08974 | -0,67 | -1,59 | 0,06331 | NM_021018       | LOC728675  |  |
| 8007641 | -1,17 | -2,25 | 0,02117 | 0,67  | 1,59  | 0,39500 | ENST00000434166 | PRSS42     |  |
| 8086683 | -1,17 | -2,25 | 0,03164 | -1,67 | -3,17 | 0,00028 | NM_182702       | ---        |  |
| 7945972 | -1,17 | -2,25 | 0,00191 | -0,75 | -1,68 | 0,00033 | ---             | ---        |  |
| 8019908 | -1,17 | -2,25 | 0,08331 | -2,09 | -4,27 | 0,00017 | ---             | ---        |  |
| 8100601 | -1,17 | -2,25 | 0,00029 | -0,99 | -1,98 | 0,05778 | ---             | FLJ40606   |  |
| 8066637 | -1,17 | -2,25 | 0,01459 | -2,07 | -4,21 | 0,00908 | AK097925        | ---        |  |
| 8121485 | -1,17 | -2,25 | 0,00179 | -0,67 | -1,59 | 0,00333 | ---             | ---        |  |
| 7998629 | -1,17 | -2,25 | 0,03855 | -1,70 | -3,25 | 0,01307 | ---             | PRR19      |  |
| 8029214 | -1,17 | -2,25 | 0,00110 | -0,47 | -1,39 | 0,05491 | NM_199285       | PLEKHG6    |  |
| 7953303 | -1,17 | -2,25 | 0,05578 | -0,42 | -1,34 | 0,16034 | NM_018173       | RAP1GAP2   |  |
| 8003773 | -1,17 | -2,25 | 0,02385 | 1,56  | 2,95  | 0,00926 | NM_015085       | LTK        |  |
| 7987650 | -1,17 | -2,25 | 0,04127 | -1,91 | -3,77 | 0,00002 | NM_002344       | CCBL1      |  |
| 8164496 | -1,17 | -2,25 | 0,00530 | 0,05  | 1,04  | 0,87051 | NM_004059       | C2orf65    |  |
| 8053248 | -1,17 | -2,25 | 0,00568 | -1,20 | -2,29 | 0,06591 | BC025997        | C19orf52   |  |
| 8025783 | -1,17 | -2,25 | 0,18411 | -0,58 | -1,50 | 0,17818 | BC011833        | CMTM2      |  |
| 7996313 | -1,17 | -2,25 | 0,05932 | -0,46 | -1,37 | 0,08014 | NM_144673       | NPAS4      |  |
| 7941599 | -1,17 | -2,25 | 0,04695 | -1,50 | -2,83 | 0,00013 | NM_178864       | FKBP2      |  |
| 7940914 | -1,17 | -2,25 | 0,07215 | -0,68 | -1,61 | 0,15443 | NM_004470       | ---        |  |
| 8137863 | -1,17 | -2,25 | 0,04219 | -1,50 | -2,84 | 0,02737 | ---             | ENTPD2     |  |
| 8165416 | -1,17 | -2,25 | 0,02553 | -0,40 | -1,32 | 0,22236 | NM_203468       | ---        |  |
| 7961453 | -1,17 | -2,25 | 0,00497 | -1,29 | -2,44 | 0,00022 | ---             | ---        |  |
| 8120979 | -1,17 | -2,25 | 0,01998 | -1,07 | -2,09 | 0,00148 | ---             | ---        |  |
| 8147242 | -1,17 | -2,25 | 0,08012 | -0,82 | -1,77 | 0,07084 | ---             | OR6B3      |  |
| 8060084 | -1,17 | -2,25 | 0,04540 | -0,97 | -1,96 | 0,06827 | NM_173351       | ---        |  |
| 8116577 | -1,17 | -2,25 | 0,00202 | -1,23 | -2,35 | 0,01434 | ---             | NCRNA00105 |  |
| 8165765 | -1,17 | -2,25 | 0,04794 | -1,37 | -2,59 | 0,00097 | NR_026711       | CRYGB      |  |
| 8058530 | -1,17 | -2,25 | 0,05928 | -1,19 | -2,29 | 0,00092 | NM_005210       | B3GNT6     |  |
| 7942693 | -1,17 | -2,25 | 0,01498 | -1,70 | -3,26 | 0,00081 | NM_138706       | FBXO46     |  |
| 8037647 | -1,17 | -2,25 | 0,03935 | -0,72 | -1,64 | 0,08864 | NM_001080469    | SLC27A3    |  |
| 7905664 | -1,17 | -2,25 | 0,00401 | -0,86 | -1,81 | 0,15760 | NM_024330       | LGI4       |  |
| 8036055 | -1,17 | -2,25 | 0,05915 | -1,28 | -2,44 | 0,04188 | NM_139284       | PLP1       |  |
| 8169061 | -1,17 | -2,26 | 0,04069 | -1,44 | -2,72 | 0,00074 | NM_000533       | TCHHL1     |  |
| 7920135 | -1,17 | -2,26 | 0,04200 | -0,93 | -1,90 | 0,00797 | NM_001008536    | ---        |  |
| 7966684 | -1,17 | -2,26 | 0,01251 | -1,19 | -2,28 | 0,01691 | ---             | ---        |  |
| 8121247 | -1,17 | -2,26 | 0,05616 | -0,97 | -1,96 | 0,06000 | ---             | DHRS4L2    |  |
| 7973458 | -1,17 | -2,26 | 0,03969 | 0,96  | 1,95  | 0,15131 | NM_198083       | ---        |  |
| 8148194 | -1,17 | -2,26 | 0,02594 | -0,49 | -1,41 | 0,00552 | ---             | NHLH1      |  |
| 7906597 | -1,17 | -2,26 | 0,04686 | -1,25 | -2,37 | 0,02416 | NM_005598       | ASL        |  |
| 8133122 | -1,17 | -2,26 | 0,09813 | -0,70 | -1,63 | 0,24853 | NM_001024943    | ---        |  |
| 7989659 | -1,17 | -2,26 | 0,06281 | -1,39 | -2,63 | 0,00911 | ---             | MPG        |  |
| 7991742 | -1,17 | -2,26 | 0,03185 | -1,03 | -2,04 | 0,00143 | NM_002434       | ZNF408     |  |
| 7939699 | -1,17 | -2,26 | 0,01517 | -0,44 | -1,36 | 0,14960 | NM_024741       | NCRNA00164 |  |
| 8055303 | -1,17 | -2,26 | 0,01224 | -1,77 | -3,41 | 0,00026 | BC029821        | KIAA1614   |  |
| 7907882 | -1,17 | -2,26 | 0,05327 | -1,09 | -2,13 | 0,01869 | NM_020950       | ---        |  |
| 7982292 | -1,17 | -2,26 | 0,02007 | -0,83 | -1,78 | 0,00163 | ---             | MGC16075   |  |
| 8132707 | -1,17 | -2,26 | 0,02496 | -0,97 | -1,96 | 0,07540 | BC007354        | ---        |  |
| 7957528 | -1,17 | -2,26 | 0,00696 | -1,47 | -2,77 | 0,01645 | ---             | A2LD1      |  |
| 7972570 | -1,17 | -2,26 | 0,01230 | -0,69 | -1,61 | 0,08511 | NM_033110       | ---        |  |
| 8089108 | -1,17 | -2,26 | 0,06348 | -1,38 | -2,59 | 0,00239 | ---             | TMEM79     |  |
| 7906146 | -1,17 | -2,26 | 0,01859 | -0,39 | -1,31 | 0,21091 | NR_026678       | FAM170B    |  |
| 7933498 | -1,17 | -2,26 | 0,07707 | -1,75 | -3,35 | 0,00750 | NM_001164484    | FOXO4      |  |
| 8159808 | -1,17 | -2,26 | 0,08048 | -1,56 | -2,96 | 0,01779 | NM_027305       | ---        |  |
| 8113871 | -1,17 | -2,26 | 0,02737 | -1,27 | -2,41 | 0,01673 | ---             | MYH8       |  |
| 8012663 | -1,17 | -2,26 | 0,01784 | -1,39 | -2,62 | 0,00911 | NM_002472       | ---        |  |
| 8051234 | -1,18 | -2,26 | 0,01165 | -1,12 | -2,18 | 0,00223 | ---             | C18orf56   |  |
| 8021963 | -1,18 | -2,26 | 0,00678 | 0,37  | 1,29  | 0,39470 | NM_001012716    | HCG27      |  |
| 8179235 | -1,18 | -2,26 | 0,14721 | -2,56 | -5,91 | 0,07115 | NR_026791       | TUBB4      |  |
| 8033233 | -1,18 | -2,26 | 0,01563 | 1,00  | 2,00  | 0,04575 | NM_006087       | SPAG11B    |  |
| 8149180 | -1,18 | -2,26 | 0,02806 | -1,35 | -2,54 | 0,00306 | NM_016512       | ---        |  |
| 8105218 | -1,18 | -2,26 | 0,01515 | -1,02 | -2,02 | 0,02384 | ---             | LRIT1      |  |
| 7934783 | -1,18 | -2,26 | 0,06931 | -1,16 | -2,23 | 0,05187 | NM_015613       | ZMYND10    |  |
| 8087653 | -1,18 | -2,26 | 0,08181 | -1,57 | -2,97 | 0,01811 | NM_015896       | COX4I2     |  |
| 8061572 | -1,18 | -2,26 | 0,01819 | -1,30 | -2,45 | 0,01982 | NM_032609       | CTRC       |  |
| 7898167 | -1,18 | -2,26 | 0,14919 | -0,99 | -1,98 | 0,14588 | NM_007272       | RBMY1A3P   |  |

|         |       |       |         |       |       |         |                 |              |
|---------|-------|-------|---------|-------|-------|---------|-----------------|--------------|
| 8177096 | -1,18 | -2,26 | 0,00455 | -1,14 | -2,21 | 0,09656 | NR_001547       | PRSS21       |
| 7992722 | -1,18 | -2,26 | 0,03343 | -1,30 | -2,46 | 0,07593 | NM_006799       | LOC100128175 |
| 8081808 | -1,18 | -2,26 | 0,04151 | -0,92 | -1,90 | 0,01332 | AF119886        | C21orf129    |
| 8070482 | -1,18 | -2,26 | 0,01404 | -1,24 | -2,36 | 0,03123 | NR_027272       | HMCN2        |
| 8158666 | -1,18 | -2,26 | 0,09556 | -1,90 | -3,72 | 0,00368 | AK128680        | FAM83H       |
| 8153488 | -1,18 | -2,26 | 0,02954 | 0,54  | 1,45  | 0,48895 | NM_198488       | ROBO3        |
| 7944882 | -1,18 | -2,26 | 0,01866 | -0,45 | -1,37 | 0,20670 | NM_022370       | EID3         |
| 7958200 | -1,18 | -2,26 | 0,06069 | -0,86 | -1,81 | 0,00344 | NM_001008394    | CALB2        |
| 7997139 | -1,18 | -2,26 | 0,07371 | 0,42  | 1,34  | 0,22343 | NM_001740       | ANKRD20A5    |
| 8020343 | -1,18 | -2,26 | 0,15889 | -0,77 | -1,71 | 0,16737 | BC127726        | ZNF703       |
| 8145829 | -1,18 | -2,26 | 0,02611 | -2,45 | -5,48 | 0,00001 | NM_025069       | B4GALNT3     |
| 7952927 | -1,18 | -2,26 | 0,05221 | 0,46  | 1,37  | 0,34034 | NM_173593       | ---          |
| 8022570 | -1,18 | -2,26 | 0,01260 | -1,05 | -2,08 | 0,16924 | ---             | SOX12        |
| 8060334 | -1,18 | -2,26 | 0,19496 | -1,00 | -1,99 | 0,16656 | NM_006943       | ---          |
| 8091554 | -1,18 | -2,26 | 0,12669 | -0,71 | -1,64 | 0,01109 | ---             | ---          |
| 8003810 | -1,18 | -2,26 | 0,14564 | -1,45 | -2,74 | 0,02256 | ---             | ---          |
| 8114205 | -1,18 | -2,26 | 0,08830 | -1,33 | -2,52 | 0,00066 | ---             | KRTAP4-5     |
| 8015232 | -1,18 | -2,26 | 0,07658 | -1,66 | -3,16 | 0,00445 | NM_033188       | ADPRHL1      |
| 7972902 | -1,18 | -2,26 | 0,14084 | -0,35 | -1,28 | 0,12812 | NM_138430       | TNFSF11      |
| 7968851 | -1,18 | -2,26 | 0,03253 | -1,64 | -3,11 | 0,00012 | NM_003701       | ISX          |
| 8072636 | -1,18 | -2,26 | 0,02537 | -1,03 | -2,04 | 0,00212 | NM_001008494    | KIF12        |
| 8163548 | -1,18 | -2,26 | 0,03616 | -1,12 | -2,18 | 0,00077 | NM_138424       | TNIP3        |
| 8102594 | -1,18 | -2,26 | 0,00475 | -1,07 | -2,10 | 0,00005 | NM_024873       | LOC100291336 |
| 8039584 | -1,18 | -2,26 | 0,07908 | -1,00 | -2,00 | 0,03141 | XM_002347980    | KLK14        |
| 8038770 | -1,18 | -2,26 | 0,15109 | -1,61 | -3,05 | 0,00953 | NM_022046       | FAM167B      |
| 7899750 | -1,18 | -2,26 | 0,11730 | -1,69 | -3,22 | 0,04214 | NM_032648       | LRRC8E       |
| 8025347 | -1,18 | -2,26 | 0,02362 | -0,52 | -1,44 | 0,19953 | NM_025061       | GPR149       |
| 8091588 | -1,18 | -2,26 | 0,08150 | -1,46 | -2,76 | 0,00104 | NM_001038705    | MYO16        |
| 7969995 | -1,18 | -2,26 | 0,01973 | -1,72 | -3,29 | 0,00273 | NM_015011       | TMIGD1       |
| 8014025 | -1,18 | -2,26 | 0,06888 | -0,80 | -1,74 | 0,11766 | NM_206832       | ---          |
| 8148515 | -1,18 | -2,27 | 0,03614 | -2,12 | -4,33 | 0,00082 | ---             | OIT3         |
| 7928330 | -1,18 | -2,27 | 0,02381 | -1,65 | -3,13 | 0,00460 | NM_152635       | DERL3        |
| 8074944 | -1,18 | -2,27 | 0,10374 | -0,66 | -1,58 | 0,23998 | NM_198440       | MGC14436     |
| 7966229 | -1,18 | -2,27 | 0,01604 | -0,11 | -1,08 | 0,49690 | NR_026661       | ---          |
| 8139083 | -1,18 | -2,27 | 0,21236 | -0,96 | -1,95 | 0,01489 | ---             | LOC220077    |
| 7950140 | -1,18 | -2,27 | 0,04015 | -1,34 | -2,53 | 0,00077 | AF229166        | OPLAH        |
| 8153625 | -1,18 | -2,27 | 0,02607 | 0,43  | 1,35  | 0,35491 | NM_017570       | JAK3         |
| 8035351 | -1,18 | -2,27 | 0,00206 | -0,75 | -1,68 | 0,21361 | NM_000215       | LRRC3B       |
| 8078305 | -1,18 | -2,27 | 0,03016 | -1,36 | -2,58 | 0,00497 | NM_052953       | ---          |
| 8045005 | -1,18 | -2,27 | 0,00020 | -0,97 | -1,95 | 0,06868 | ---             | C20orf200    |
| 8067530 | -1,18 | -2,27 | 0,02097 | -1,81 | -3,50 | 0,00746 | NR_033263       | CYP4F3       |
| 8026456 | -1,18 | -2,27 | 0,02286 | -1,05 | -2,06 | 0,05917 | NM_000896       | SLC18A2      |
| 7930837 | -1,18 | -2,27 | 0,00163 | 1,08  | 2,11  | 0,09131 | NM_003054       | ---          |
| 7938685 | -1,18 | -2,27 | 0,04684 | -0,10 | -1,07 | 0,72005 | ---             | ---          |
| 7952737 | -1,18 | -2,27 | 0,01774 | -0,90 | -1,87 | 0,00877 | ---             | LRRC25       |
| 8035456 | -1,18 | -2,27 | 0,09771 | -1,14 | -2,21 | 0,00729 | NM_145256       | KLK2         |
| 8030768 | -1,18 | -2,27 | 0,04815 | -0,77 | -1,71 | 0,01381 | NM_001002231    | CRB2         |
| 8157731 | -1,18 | -2,27 | 0,07820 | -1,17 | -2,25 | 0,00057 | NM_173689       | DTX4         |
| 7940160 | -1,18 | -2,27 | 0,03591 | -0,42 | -1,33 | 0,38592 | NM_015177       | C21orf30     |
| 8069131 | -1,18 | -2,27 | 0,00306 | -0,56 | -1,47 | 0,31393 | ENST00000443689 | HLA-DQA2     |
| 8178205 | -1,18 | -2,27 | 0,04961 | -2,23 | -4,70 | 0,00079 | NM_020056       | ---          |
| 7975222 | -1,18 | -2,27 | 0,00033 | -1,07 | -2,10 | 0,03810 | ---             | MIR129-2     |
| 7939463 | -1,18 | -2,27 | 0,07592 | -2,11 | -4,32 | 0,00420 | NR_029697       | ELMO3        |
| 7996468 | -1,18 | -2,27 | 0,08105 | 0,39  | 1,31  | 0,46282 | NM_024712       | ISOC2        |
| 8039511 | -1,18 | -2,27 | 0,02808 | -0,40 | -1,32 | 0,05646 | NM_024710       | ---          |
| 8107127 | -1,18 | -2,27 | 0,08303 | -1,70 | -3,25 | 0,00479 | ---             | SLC22A12     |
| 7941074 | -1,18 | -2,27 | 0,00788 | -1,15 | -2,22 | 0,00191 | NM_144585       | ---          |
| 8047185 | -1,18 | -2,27 | 0,12817 | -1,03 | -2,05 | 0,01219 | ---             | ---          |
| 8121945 | -1,18 | -2,27 | 0,04039 | -1,42 | -2,68 | 0,00066 | ---             | TSPAN15      |
| 7928046 | -1,18 | -2,27 | 0,00918 | 2,39  | 5,23  | 0,00773 | NM_012339       | FOXG1        |
| 7973745 | -1,18 | -2,27 | 0,06110 | -2,55 | -5,84 | 0,00824 | NM_005249       | ---          |
| 8056215 | -1,18 | -2,27 | 0,04294 | -1,36 | -2,57 | 0,00814 | ---             | ERVWE1       |
| 8140909 | -1,18 | -2,27 | 0,07588 | -1,99 | -3,98 | 0,00561 | NM_014590       | SEMA4D       |
| 8162231 | -1,18 | -2,27 | 0,05416 | -0,02 | -1,02 | 0,93479 | NM_001142287    | NDRG2        |
| 7977621 | -1,18 | -2,27 | 0,03369 | 1,03  | 2,05  | 0,00900 | NM_201540       | TUBB4Q       |
| 8104119 | -1,18 | -2,27 | 0,26215 | -0,89 | -1,85 | 0,01846 | NM_020040       | OR1S2        |
| 7948312 | -1,18 | -2,27 | 0,00405 | -1,56 | -2,94 | 0,04785 | NM_001004459    | DEFB112      |
| 8126943 | -1,18 | -2,27 | 0,00075 | -1,13 | -2,19 | 0,00533 | NM_001037498    | OR2C3        |
| 7925720 | -1,18 | -2,27 | 0,00285 | -1,55 | -2,93 | 0,00053 | NM_198074       | FRMD1        |
| 8130837 | -1,18 | -2,27 | 0,01209 | -1,37 | -2,58 | 0,01760 | NM_024919       | C20orf135    |
| 8064203 | -1,18 | -2,27 | 0,07015 | -1,53 | -2,88 | 0,00546 | NM_080622       | NUBP2        |
| 7992388 | -1,18 | -2,27 | 0,02535 | -0,42 | -1,34 | 0,31700 | NM_012225       | OR10W1       |
| 7948316 | -1,18 | -2,27 | 0,01245 | -1,14 | -2,21 | 0,00146 | NM_207374       | TSPY1        |

|         |       |       |         |       |       |         |                   |           |
|---------|-------|-------|---------|-------|-------|---------|-------------------|-----------|
| 8176494 | -1,18 | -2,27 | 0,07678 | -1,34 | -2,54 | 0,00017 | NM_003308         | SYT12     |
| 7941749 | -1,18 | -2,27 | 0,02611 | -0,40 | -1,32 | 0,29243 | NM_177963         | S100A7A   |
| 7905576 | -1,18 | -2,27 | 0,20742 | -1,84 | -3,59 | 0,00211 | NM_176823         | ---       |
| 7958207 | -1,18 | -2,27 | 0,14896 | -1,21 | -2,31 | 0,03043 | --- AIF1          | ---       |
| 8118158 | -1,18 | -2,27 | 0,03144 | -1,10 | -2,15 | 0,03498 | NM_004847         | AIF1      |
| 8177996 | -1,18 | -2,27 | 0,03144 | -1,10 | -2,15 | 0,03498 | NM_004847         | AIF1      |
| 8179276 | -1,18 | -2,27 | 0,03144 | -1,10 | -2,15 | 0,03498 | NM_004847         | LRRTM1    |
| 8053349 | -1,18 | -2,27 | 0,05205 | -1,19 | -2,28 | 0,00034 | NM_178839         | TAF6L     |
| 7948834 | -1,18 | -2,27 | 0,04897 | -0,89 | -1,86 | 0,04637 | NM_006473         | ---       |
| 8006083 | -1,18 | -2,27 | 0,02796 | -1,62 | -3,08 | 0,01650 | ---               | ---       |
| 8101990 | -1,18 | -2,27 | 0,01637 | -0,42 | -1,34 | 0,02605 | --- DDX12         | ---       |
| 7961031 | -1,18 | -2,27 | 0,04086 | 0,44  | 1,35  | 0,39380 | NR_033399         | ---       |
| 7957627 | -1,18 | -2,27 | 0,01395 | -1,32 | -2,50 | 0,19530 | ---               | ---       |
| 8003605 | -1,18 | -2,27 | 0,64287 | -2,55 | -5,84 | 0,03332 | --- ZBED2         | ---       |
| 8089467 | -1,18 | -2,27 | 0,02211 | -0,83 | -1,77 | 0,29926 | NM_024508         | FLJ46836  |
| 8164627 | -1,19 | -2,27 | 0,01898 | -1,24 | -2,37 | 0,00758 | ENST00000358748   | ---       |
| 7932610 | -1,19 | -2,27 | 0,06273 | -0,96 | -1,95 | 0,00276 | --- HSD3B1        | ---       |
| 7904421 | -1,19 | -2,27 | 0,00164 | -1,26 | -2,40 | 0,00111 | NM_000862         | ---       |
| 8100389 | -1,19 | -2,27 | 0,03576 | -0,73 | -1,66 | 0,03381 | ---               | ---       |
| 7903024 | -1,19 | -2,27 | 0,11585 | -1,63 | -3,08 | 0,00010 | ---               | ---       |
| 8089462 | -1,19 | -2,27 | 0,00985 | -2,01 | -4,03 | 0,00121 | ---               | ---       |
| 7932130 | -1,19 | -2,27 | 0,00569 | -1,88 | -3,67 | 0,00067 | ---               | ---       |
| 8137635 | -1,19 | -2,27 | 0,11218 | -1,43 | -2,69 | 0,06337 | --- KRTAP3-1      | ---       |
| 8015173 | -1,19 | -2,27 | 0,02144 | -1,39 | -2,61 | 0,00450 | NM_031958         | KRTAP3-1  |
| 8019593 | -1,19 | -2,27 | 0,02144 | -1,39 | -2,61 | 0,00450 | NM_031958         | OR13C9    |
| 8162938 | -1,19 | -2,27 | 0,04043 | -1,49 | -2,80 | 0,03187 | NM_001001956      | ---       |
| 8004165 | -1,19 | -2,27 | 0,00575 | -0,87 | -1,83 | 0,05669 | --- NDUFB1        | ---       |
| 7980955 | -1,19 | -2,27 | 0,01691 | -0,62 | -1,53 | 0,04448 | NM_004545         | RUFY4     |
| 8048211 | -1,19 | -2,28 | 0,00574 | -0,45 | -1,37 | 0,04715 | NM_198483         | ---       |
| 8010059 | -1,19 | -2,28 | 0,00337 | -0,97 | -1,96 | 0,00023 | --- RAD51L3       | ---       |
| 8014199 | -1,19 | -2,28 | 0,00272 | 0,53  | 1,45  | 0,19509 | NM_002878         | HMGB4     |
| 7899898 | -1,19 | -2,28 | 0,01456 | -0,81 | -1,75 | 0,03661 | NM_145205         | TTC16     |
| 8158094 | -1,19 | -2,28 | 0,01794 | -1,76 | -3,38 | 0,01444 | NM_144965         | TSPY2     |
| 8176419 | -1,19 | -2,28 | 0,07307 | -1,46 | -2,74 | 0,00085 | NM_022573         | CTSE      |
| 7909164 | -1,19 | -2,28 | 0,11315 | -0,97 | -1,96 | 0,04496 | NM_001910         | ZCCHC3    |
| 8060330 | -1,19 | -2,28 | 0,01331 | -0,34 | -1,27 | 0,29678 | NM_033089         | ---       |
| 8142401 | -1,19 | -2,28 | 0,01902 | -0,82 | -1,77 | 0,00365 | ---               | ---       |
| 8158991 | -1,19 | -2,28 | 0,00085 | -0,95 | -1,93 | 0,06586 | --- OR51B2        | ---       |
| 7946069 | -1,19 | -2,28 | 0,12224 | -1,59 | -3,00 | 0,02551 | NM_033180         | KLK7      |
| 8038695 | -1,19 | -2,28 | 0,01037 | -1,36 | -2,56 | 0,00053 | NM_139277         | ANGPT4    |
| 8064396 | -1,19 | -2,28 | 0,00200 | -0,85 | -1,80 | 0,09345 | NM_015985         | SNORD96B  |
| 8174507 | -1,19 | -2,28 | 0,06603 | -1,23 | -2,35 | 0,00245 | NR_004379         | ---       |
| 8082242 | -1,19 | -2,28 | 0,03251 | -1,73 | -3,32 | 0,00550 | --- APOA2         | ---       |
| 7921834 | -1,19 | -2,28 | 0,01350 | -1,12 | -2,17 | 0,00902 | NM_001643         | XAGE5     |
| 8167742 | -1,19 | -2,28 | 0,00196 | -1,17 | -2,26 | 0,06809 | NM_130775         | USP17     |
| 8094116 | -1,19 | -2,28 | 0,50819 | -3,29 | -9,78 | 0,00040 | NM_001105662      | USP17     |
| 8094118 | -1,19 | -2,28 | 0,50819 | -3,29 | -9,78 | 0,00040 | NM_001105662      | USP17     |
| 8094120 | -1,19 | -2,28 | 0,50819 | -3,29 | -9,78 | 0,00040 | NM_001105662      | USP17     |
| 8094124 | -1,19 | -2,28 | 0,50819 | -3,29 | -9,78 | 0,00040 | NM_001105662      | USP17     |
| 8094126 | -1,19 | -2,28 | 0,50819 | -3,29 | -9,78 | 0,00040 | NM_001105662      | USP17     |
| 8094128 | -1,19 | -2,28 | 0,50819 | -3,29 | -9,78 | 0,00040 | NM_001105662      | USP17     |
| 8094132 | -1,19 | -2,28 | 0,50819 | -3,29 | -9,78 | 0,00040 | NM_001105662      | STOX2     |
| 8098549 | -1,19 | -2,28 | 0,01869 | 0,18  | 1,13  | 0,56616 | NM_020225         | C10orf120 |
| 7936793 | -1,19 | -2,28 | 0,15533 | -1,42 | -2,67 | 0,02626 | BC140922 IGFL4    | ---       |
| 8037750 | -1,19 | -2,28 | 0,05795 | -1,51 | -2,85 | 0,00920 | NM_001002923      | BANF2     |
| 8061122 | -1,19 | -2,28 | 0,00079 | -0,81 | -1,75 | 0,06555 | NM_178477         | COX7B2    |
| 8100127 | -1,19 | -2,28 | 0,00470 | -1,07 | -2,09 | 0,00739 | NM_130902         | CNGA4     |
| 7938082 | -1,19 | -2,28 | 0,00362 | -0,47 | -1,39 | 0,16005 | NM_001037329      | CDCA3     |
| 7960702 | -1,19 | -2,28 | 0,00707 | 1,55  | 2,93  | 0,00366 | NM_031299         | LOC283711 |
| 7982333 | -1,19 | -2,28 | 0,00765 | -0,72 | -1,65 | 0,06883 | AK127052 SNORD62A | ---       |
| 8158862 | -1,19 | -2,28 | 0,05793 | -0,89 | -1,86 | 0,05409 | NR_002914         | SNORD62A  |
| 8158864 | -1,19 | -2,28 | 0,05793 | -0,89 | -1,86 | 0,05409 | NR_002914         | STH       |
| 8007846 | -1,19 | -2,28 | 0,04184 | -0,48 | -1,39 | 0,00474 | NM_001007532      | C10orf27  |
| 7934166 | -1,19 | -2,28 | 0,02852 | -0,61 | -1,53 | 0,03109 | NM_152710         | PTF1A     |
| 7926674 | -1,19 | -2,28 | 0,13536 | -1,44 | -2,72 | 0,02711 | NM_178161         | ARRDC2    |
| 8026915 | -1,19 | -2,28 | 0,01294 | -0,10 | -1,08 | 0,85351 | NM_015683         | MXD3      |
| 8116012 | -1,19 | -2,28 | 0,06288 | -0,57 | -1,48 | 0,28559 | NM_031300         | ---       |
| 8174277 | -1,19 | -2,28 | 0,00110 | -1,13 | -2,19 | 0,07925 | --- ACTR3C        | ---       |
| 8143766 | -1,19 | -2,28 | 0,01215 | -1,76 | -3,38 | 0,01771 | NM_001164458      | SIRPB1    |
| 8064471 | -1,19 | -2,28 | 0,03264 | -0,51 | -1,42 | 0,15053 | NM_006065         | ---       |
| 8007152 | -1,19 | -2,28 | 0,14151 | -0,97 | -1,96 | 0,02242 | ---               | ---       |
| 8133900 | -1,19 | -2,28 | 0,06174 | -1,43 | -2,70 | 0,03785 | ---               | ---       |
| 8051236 | -1,19 | -2,28 | 0,01711 | -1,57 | -2,97 | 0,02103 | --- C22orf45      | ---       |

|         |       |       |         |       |        |         |                 |           |
|---------|-------|-------|---------|-------|--------|---------|-----------------|-----------|
| 8075005 | -1,19 | -2,28 | 0,06815 | -1,75 | -3,37  | 0,00174 | NR_028484       | NOS3      |
| 8137280 | -1,19 | -2,28 | 0,04283 | -1,80 | -3,49  | 0,00094 | NM_000603       | ---       |
| 7988412 | -1,19 | -2,28 | 0,00351 | -1,59 | -3,02  | 0,00283 | ---             | PRODH2    |
| 8036172 | -1,19 | -2,28 | 0,03865 | -2,41 | -5,31  | 0,00243 | ENST00000443172 | ---       |
| 8107530 | -1,19 | -2,28 | 0,07606 | -2,80 | -6,95  | 0,00155 | ---             | THOP1     |
| 8024497 | -1,19 | -2,28 | 0,00838 | -0,27 | -1,21  | 0,42494 | NM_003249       | ZSCAN4    |
| 8031799 | -1,19 | -2,28 | 0,00971 | -1,09 | -2,13  | 0,00168 | NM_152677       | CRMP1     |
| 8099172 | -1,19 | -2,28 | 0,05346 | -1,48 | -2,79  | 0,00067 | NM_001313       | TMED6     |
| 8002283 | -1,19 | -2,28 | 0,00861 | -0,82 | -1,76  | 0,06136 | NM_144676       | CCR9      |
| 8079370 | -1,19 | -2,28 | 0,05415 | -1,39 | -2,63  | 0,04222 | NM_031200       | FGD2      |
| 8119132 | -1,19 | -2,28 | 0,03347 | -1,34 | -2,52  | 0,00977 | NM_173558       | ---       |
| 8095159 | -1,19 | -2,28 | 0,30818 | -2,99 | -7,95  | 0,00436 | ---             | ACAA1     |
| 8086216 | -1,19 | -2,28 | 0,00891 | -2,02 | -4,06  | 0,00684 | AK127051        | ---       |
| 8151583 | -1,19 | -2,28 | 0,00132 | -0,84 | -1,79  | 0,00286 | ---             | ---       |
| 8112043 | -1,19 | -2,28 | 0,08382 | -1,14 | -2,21  | 0,01425 | ---             | ---       |
| 8169233 | -1,19 | -2,28 | 0,02033 | -1,38 | -2,61  | 0,14121 | ---             | PEX10     |
| 7911720 | -1,19 | -2,28 | 0,02755 | 0,38  | 1,30   | 0,35774 | NM_153818       | PHOX2A    |
| 7950136 | -1,19 | -2,28 | 0,07149 | -1,71 | -3,28  | 0,00013 | NM_005169       | MIR339    |
| 8137707 | -1,19 | -2,28 | 0,24043 | -2,05 | -4,14  | 0,03699 | NR_029898       | ---       |
| 7936966 | -1,19 | -2,28 | 0,00388 | -0,75 | -1,69  | 0,00276 | ---             | ---       |
| 8035175 | -1,19 | -2,28 | 0,00397 | -0,92 | -1,90  | 0,01802 | ---             | ---       |
| 7944021 | -1,19 | -2,28 | 0,00275 | -1,19 | -2,28  | 0,00748 | ---             | ASPRV1    |
| 8052828 | -1,19 | -2,29 | 0,07531 | -0,52 | -1,43  | 0,17163 | NM_152792       | FBXL15    |
| 7930099 | -1,19 | -2,29 | 0,00153 | -0,80 | -1,74  | 0,06188 | NM_024326       | ASTL      |
| 8053872 | -1,19 | -2,29 | 0,02116 | -1,87 | -3,66  | 0,00005 | NM_001002036    | FAM109A   |
| 7966389 | -1,19 | -2,29 | 0,11977 | -0,59 | -1,51  | 0,27655 | NM_001177996    | ---       |
| 8000369 | -1,19 | -2,29 | 0,09488 | -0,99 | -1,99  | 0,01035 | ---             | SLC23A1   |
| 8114491 | -1,19 | -2,29 | 0,11223 | -0,41 | -1,32  | 0,16280 | NM_005847       | ---       |
| 8123763 | -1,19 | -2,29 | 0,03371 | -1,13 | -2,19  | 0,02115 | ---             | KIF17     |
| 7913271 | -1,19 | -2,29 | 0,01646 | -1,41 | -2,66  | 0,00351 | NM_020816       | BCAS1     |
| 8067125 | -1,19 | -2,29 | 0,00959 | -1,73 | -3,32  | 0,02882 | NM_003657       | MBD1      |
| 8023323 | -1,19 | -2,29 | 0,08683 | -0,20 | -1,15  | 0,63599 | NM_015846       | MIR150    |
| 8038393 | -1,19 | -2,29 | 0,04592 | -1,47 | -2,76  | 0,01715 | NR_029703       | CYLC1     |
| 8168569 | -1,19 | -2,29 | 0,12714 | -1,42 | -2,68  | 0,00200 | NM_021118       | ---       |
| 7925927 | -1,19 | -2,29 | 0,14195 | -1,15 | -2,22  | 0,07037 | ---             | ---       |
| 7931830 | -1,19 | -2,29 | 0,14195 | -1,15 | -2,22  | 0,07037 | ---             | SIK1      |
| 8070665 | -1,19 | -2,29 | 0,02187 | 2,80  | 6,98   | 0,00437 | NM_173354       | ---       |
| 8080909 | -1,19 | -2,29 | 0,17268 | -2,24 | -4,72  | 0,01374 | ---             | HBA2      |
| 7991762 | -1,19 | -2,29 | 0,06905 | -1,97 | -3,92  | 0,00741 | NM_000517       | HBA1      |
| 7991766 | -1,19 | -2,29 | 0,06905 | -1,97 | -3,92  | 0,00741 | NM_000558       | DEFB114   |
| 8126934 | -1,19 | -2,29 | 0,10049 | -1,05 | -2,06  | 0,00085 | NM_001037499    | ---       |
| 8162247 | -1,19 | -2,29 | 0,15756 | -0,56 | -1,47  | 0,03393 | ---             | LLGL2     |
| 8009844 | -1,19 | -2,29 | 0,04647 | 1,51  | 2,85   | 0,07366 | NM_001031803    | ---       |
| 8109824 | -1,19 | -2,29 | 0,12586 | -1,24 | -2,37  | 0,00020 | ---             | ISL2      |
| 7985080 | -1,19 | -2,29 | 0,02483 | -1,35 | -2,55  | 0,00837 | NM_145805       | C10orf92  |
| 7937112 | -1,19 | -2,29 | 0,01364 | -1,32 | -2,49  | 0,00483 | BC034223        | ---       |
| 8002758 | -1,19 | -2,29 | 0,01595 | -1,02 | -2,03  | 0,00891 | ---             | KRTAP4-7  |
| 8007112 | -1,19 | -2,29 | 0,32065 | -3,64 | -12,45 | 0,00027 | NM_033061       | CEACAM8   |
| 8037222 | -1,19 | -2,29 | 0,18782 | -1,59 | -3,01  | 0,02941 | NM_001816       | SLC46A2   |
| 8163437 | -1,19 | -2,29 | 0,05252 | -1,48 | -2,78  | 0,00734 | NM_033051       | ---       |
| 8075479 | -1,19 | -2,29 | 0,13276 | -0,76 | -1,69  | 0,00331 | ---             | ---       |
| 8112178 | -1,20 | -2,29 | 0,00331 | -1,46 | -2,76  | 0,01755 | ---             | TNS4      |
| 8015016 | -1,20 | -2,29 | 0,00225 | 2,58  | 5,96   | 0,00012 | NM_032865       | FAM173A   |
| 7992043 | -1,20 | -2,29 | 0,01261 | -0,75 | -1,69  | 0,29266 | BC001181        | ---       |
| 7989768 | -1,20 | -2,29 | 0,00028 | -0,81 | -1,75  | 0,05652 | ---             | CENPVL1   |
| 8167652 | -1,20 | -2,29 | 0,03414 | -1,42 | -2,67  | 0,02566 | AY730278        | CENPVL1   |
| 8172715 | -1,20 | -2,29 | 0,03414 | -1,42 | -2,67  | 0,02566 | AY730278        | ---       |
| 8123332 | -1,20 | -2,29 | 0,02166 | -1,71 | -3,27  | 0,00319 | ---             | RNU105B   |
| 8060895 | -1,20 | -2,29 | 0,04748 | -1,56 | -2,94  | 0,03399 | NR_004386       | ABCB8     |
| 8137330 | -1,20 | -2,29 | 0,10689 | -2,25 | -4,74  | 0,01672 | ENST00000356058 | ---       |
| 8129179 | -1,20 | -2,29 | 0,00449 | -1,21 | -2,31  | 0,00026 | ---             | ---       |
| 8018093 | -1,20 | -2,29 | 0,12294 | -0,36 | -1,28  | 0,07198 | ---             | ---       |
| 8049197 | -1,20 | -2,29 | 0,05115 | -1,66 | -3,17  | 0,03277 | ---             | ---       |
| 8110674 | -1,20 | -2,29 | 0,03152 | -1,03 | -2,04  | 0,05191 | ---             | TREML3    |
| 8126296 | -1,20 | -2,29 | 0,08879 | -1,76 | -3,38  | 0,00104 | NR_027256       | TMEM132D  |
| 7967641 | -1,20 | -2,29 | 0,02170 | -0,99 | -1,98  | 0,01422 | NM_133448       | ---       |
| 8118724 | -1,20 | -2,29 | 0,00967 | -1,10 | -2,14  | 0,14431 | ---             | ---       |
| 7919747 | -1,20 | -2,29 | 0,01873 | -0,76 | -1,69  | 0,00039 | ---             | C5orf38   |
| 8104307 | -1,20 | -2,29 | 0,03697 | -1,89 | -3,71  | 0,00172 | NM_178569       | C14orf178 |
| 7975995 | -1,20 | -2,29 | 0,00524 | -1,46 | -2,76  | 0,06006 | NM_174943       | FLJ32756  |
| 8076813 | -1,20 | -2,29 | 0,09598 | -0,77 | -1,71  | 0,10457 | BC041833        | SCARNA5   |
| 8049297 | -1,20 | -2,29 | 0,01577 | -1,05 | -2,07  | 0,02289 | NR_003008       | ---       |
| 8066198 | -1,20 | -2,29 | 0,00840 | -0,88 | -1,84  | 0,00739 | ---             | FAM169A   |



|          |       |       |         |       |       |         |                      |              |
|----------|-------|-------|---------|-------|-------|---------|----------------------|--------------|
| 8106278  | -1,20 | -2,29 | 0,00867 | -0,51 | -1,42 | 0,01832 | NM_015566            | PEX5L        |
| 8092277  | -1,20 | -2,29 | 0,04041 | -1,42 | -2,67 | 0,00069 | NM_016559            | SNORD116-10  |
| 7981968  | -1,20 | -2,29 | 0,01599 | -1,04 | -2,06 | 0,00042 | NR_003325            | ATP4B        |
| 7972923  | -1,20 | -2,29 | 0,08596 | -1,74 | -3,33 | 0,00211 | NM_000705            | MMP27        |
| 7951235  | -1,20 | -2,29 | 0,00346 | -1,29 | -2,44 | 0,00140 | NM_022122            | NCKAP5L      |
| 7963121  | -1,20 | -2,29 | 0,01263 | -0,80 | -1,74 | 0,06977 | NM_001037806         | MIR181B2     |
| 8157802  | -1,20 | -2,29 | 0,05530 | -1,49 | -2,82 | 0,00785 | NR_029782            | NR0B2        |
| 7914000  | -1,20 | -2,29 | 0,01511 | -1,33 | -2,51 | 0,03300 | NM_021969            | NNAT         |
| 8062395  | -1,20 | -2,29 | 0,05564 | -1,64 | -3,12 | 0,00031 | NM_005386            | ANXA8L2      |
| 7927307  | -1,20 | -2,29 | 0,02361 | -0,96 | -1,94 | 0,00132 | NM_001630            | LOC643332    |
| 7973108  | -1,20 | -2,29 | 0,02344 | -1,50 | -2,83 | 0,00057 | ENST00000258817      | RP11-410N8.4 |
| 8061742  | -1,20 | -2,29 | 0,01393 | -2,35 | -5,10 | 0,00117 | ENST00000375670      | ---          |
| 8136576  | -1,20 | -2,29 | 0,00962 | -1,96 | -3,89 | 0,00154 | ---                  | LRRC24       |
| 8153862  | -1,20 | -2,29 | 0,04705 | -1,92 | -3,78 | 0,00810 | NM_001024678         | TMEM82       |
| 7898256  | -1,20 | -2,29 | 0,07345 | -0,93 | -1,91 | 0,12764 | NM_001013641         | ---          |
| 8106189  | -1,20 | -2,29 | 0,06016 | -0,65 | -1,57 | 0,00213 | ---                  | C3orf54      |
| 8079839  | -1,20 | -2,29 | 0,01016 | -1,29 | -2,45 | 0,01351 | NM_203370            | FLJ45983     |
| 7932014  | -1,20 | -2,29 | 0,00836 | -1,95 | -3,87 | 0,00196 | NR_024256            | ---          |
| 8035935  | -1,20 | -2,30 | 0,09053 | -0,81 | -1,75 | 0,02760 | ---                  | ---          |
| 8176779  | -1,20 | -2,30 | 0,03466 | -2,00 | -4,00 | 0,00059 | ---                  | SERPINF2     |
| 8003656  | -1,20 | -2,30 | 0,06644 | -0,74 | -1,67 | 0,17059 | NM_001165920         | MIR130B      |
| 8071564  | -1,20 | -2,30 | 0,00310 | -0,87 | -1,82 | 0,02655 | NR_029845            | ---          |
| 8037760  | -1,20 | -2,30 | 0,04373 | -0,97 | -1,96 | 0,00242 | ---                  | OSBP2        |
| 8072382  | -1,20 | -2,30 | 0,01795 | 0,32  | 1,25  | 0,27610 | NM_030758            | MIR143       |
| 8109157  | -1,20 | -2,30 | 0,05406 | -0,88 | -1,84 | 0,00013 | NR_029684            | KLHDC7A      |
| 7898533  | -1,20 | -2,30 | 0,21987 | -1,82 | -3,52 | 0,02828 | NM_152375            | ---          |
| 7916020  | -1,20 | -2,30 | 0,03266 | -0,48 | -1,39 | 0,15067 | ---                  | ---          |
| 7901854  | -1,20 | -2,30 | 0,04449 | -1,54 | -2,92 | 0,01522 | ---                  | ---          |
| 8022410  | -1,20 | -2,30 | 0,00476 | -0,84 | -1,79 | 0,09459 | ---                  | OR6W1P       |
| 8143557  | -1,20 | -2,30 | 0,00312 | -0,99 | -1,98 | 0,00029 | NR_002140            | ---          |
| 8112582  | -1,20 | -2,30 | 0,04872 | -0,66 | -1,58 | 0,01814 | ---                  | BSPRY        |
| 8157300  | -1,20 | -2,30 | 0,00892 | 1,16  | 2,23  | 0,01064 | NM_017688            | ---          |
| 8062235  | -1,20 | -2,30 | 0,00342 | -0,86 | -1,82 | 0,00843 | ---                  | ---          |
| 8098259  | -1,20 | -2,30 | 0,23481 | -1,35 | -2,55 | 0,00966 | ---                  | HS6ST3       |
| 7969665  | -1,20 | -2,30 | 0,06098 | -1,32 | -2,50 | 0,00673 | NM_153456            | C8orf42      |
| 8148973  | -1,20 | -2,30 | 0,03460 | 0,25  | 1,19  | 0,39793 | NM_175075            | COBL         |
| 8139680  | -1,20 | -2,30 | 0,02873 | 3,45  | 10,95 | 0,00036 | NM_015198            | ---          |
| 8081337  | -1,20 | -2,30 | 0,03363 | -1,64 | -3,12 | 0,00028 | ---                  | AFARP1       |
| 7904084  | -1,20 | -2,30 | 0,00390 | -0,49 | -1,40 | 0,00970 | NR_002796            | MYO1G        |
| 8139433  | -1,20 | -2,30 | 0,04201 | -0,78 | -1,72 | 0,00379 | NM_033054            | C11orf36     |
| 7937868  | -1,20 | -2,30 | 0,01025 | -1,19 | -2,29 | 0,01353 | NR_027138            | FLJ46358     |
| 7970597  | -1,20 | -2,30 | 0,00008 | -1,54 | -2,92 | 0,05134 | AK128225             | BCL2         |
| 8023646  | -1,20 | -2,30 | 0,00321 | -0,97 | -1,95 | 0,02204 | NM_000633            | POU5F1P4 //  |
| POU5F1P4 |       |       |         |       |       |         |                      |              |
| 7906017  | -1,20 | -2,30 | 0,02507 | -2,14 | -4,41 | 0,00115 | GU480875 // GU480875 | GIMAP8       |
| 8137232  | -1,20 | -2,30 | 0,00144 | -1,26 | -2,39 | 0,00394 | NM_175571            | ---          |
| 8146943  | -1,20 | -2,30 | 0,02079 | -1,65 | -3,15 | 0,00014 | ---                  | CELA2A       |
| 7898176  | -1,20 | -2,30 | 0,03794 | -1,33 | -2,51 | 0,00089 | NM_033440            | ---          |
| 8132856  | -1,20 | -2,30 | 0,19124 | -0,89 | -1,85 | 0,00299 | ---                  | MIR206       |
| 8120206  | -1,20 | -2,30 | 0,17174 | -1,83 | -3,55 | 0,00130 | NR_029713            | ---          |
| 8139843  | -1,20 | -2,30 | 0,03318 | -1,35 | -2,54 | 0,00000 | ---                  | CLDN5        |
| 8074473  | -1,20 | -2,30 | 0,01075 | -1,10 | -2,14 | 0,03183 | NM_001130861         | MGC34800     |
| 7995310  | -1,20 | -2,30 | 0,09451 | -1,52 | -2,88 | 0,04693 | ENST00000319817      | XKR5         |
| 8149086  | -1,20 | -2,30 | 0,01160 | -0,64 | -1,56 | 0,07315 | NM_207411            | BSND         |
| 7901691  | -1,20 | -2,30 | 0,01963 | -1,27 | -2,41 | 0,05458 | NM_057176            | C1orf216     |
| 7914847  | -1,20 | -2,31 | 0,01623 | -1,57 | -2,97 | 0,00135 | BC026909             | TIMM17B      |
| 8172453  | -1,20 | -2,31 | 0,04825 | -1,08 | -2,11 | 0,06202 | NM_001167947         | OR7E18P      |
| 8033742  | -1,21 | -2,31 | 0,02244 | -1,41 | -2,66 | 0,00577 | X89673               | MYF6         |
| 7957373  | -1,21 | -2,31 | 0,02304 | -0,84 | -1,80 | 0,01383 | NM_002469            | C7orf29      |
| 8137219  | -1,21 | -2,31 | 0,16492 | -0,98 | -1,97 | 0,03889 | NM_138434            | ---          |
| 8017310  | -1,21 | -2,31 | 0,00458 | -0,91 | -1,88 | 0,00016 | ---                  | ---          |
| 8007917  | -1,21 | -2,31 | 0,12540 | -3,01 | -8,03 | 0,00531 | ---                  | ---          |
| 8113784  | -1,21 | -2,31 | 0,02730 | -2,33 | -5,03 | 0,00298 | ---                  | KCNC2        |
| 7964987  | -1,21 | -2,31 | 0,00552 | -1,36 | -2,57 | 0,00015 | NM_139136            | ---          |
| 8046822  | -1,21 | -2,31 | 0,03037 | -0,93 | -1,91 | 0,03740 | ---                  | MEI1         |
| 8073474  | -1,21 | -2,31 | 0,04292 | -1,17 | -2,25 | 0,00083 | NM_152513            | FLJ45079     |
| 8018818  | -1,21 | -2,31 | 0,00529 | -1,18 | -2,27 | 0,00054 | NR_028337            | ---          |
| 8025826  | -1,21 | -2,31 | 0,00539 | -1,54 | -2,90 | 0,00250 | ---                  | PACSIN1      |
| 8118804  | -1,21 | -2,31 | 0,02648 | -0,94 | -1,92 | 0,07402 | NM_020804            | ---          |
| 7971161  | -1,21 | -2,31 | 0,01211 | -1,10 | -2,14 | 0,00340 | ---                  | SNORA58      |
| 8090688  | -1,21 | -2,31 | 0,05756 | -0,33 | -1,25 | 0,02703 | NR_002985            | ---          |
| 8061912  | -1,21 | -2,31 | 0,01619 | -1,06 | -2,08 | 0,08406 | ---                  | TTY6         |
| 8176782  | -1,21 | -2,31 | 0,01468 | -1,24 | -2,36 | 0,02385 | NR_001527            | TTY6         |

|         |       |       |         |       |        |         |                 |              |
|---------|-------|-------|---------|-------|--------|---------|-----------------|--------------|
| 8177347 | -1,21 | -2,31 | 0,01468 | -1,24 | -2,36  | 0,02385 | NR_001527       | IL17RE       |
| 8077668 | -1,21 | -2,31 | 0,10593 | -1,47 | -2,77  | 0,00770 | NM_153480       | LOC93622     |
| 8093943 | -1,21 | -2,31 | 0,05952 | -0,53 | -1,44  | 0,10951 | NR_015433       | LZTS1        |
| 8149612 | -1,21 | -2,31 | 0,09488 | -1,45 | -2,73  | 0,01508 | NM_021020       | ---          |
| 8103483 | -1,21 | -2,31 | 0,25531 | -4,04 | -16,47 | 0,00237 | ---             | ---          |
| 8113344 | -1,21 | -2,31 | 0,25531 | -4,04 | -16,47 | 0,00237 | ---             | ---          |
| 8114207 | -1,21 | -2,31 | 0,25531 | -4,04 | -16,47 | 0,00237 | ---             | ZIC3         |
| 8170200 | -1,21 | -2,31 | 0,00152 | -1,75 | -3,37  | 0,01531 | NM_003413       | ---          |
| 7965154 | -1,21 | -2,31 | 0,06140 | -2,06 | -4,16  | 0,01169 | ---             | GRAMD1B      |
| 7944769 | -1,21 | -2,31 | 0,04339 | 3,21  | 9,26   | 0,00009 | NM_020716       | ---          |
| 8142343 | -1,21 | -2,31 | 0,05749 | -1,68 | -3,20  | 0,03206 | ---             | TTC22        |
| 7916425 | -1,21 | -2,31 | 0,03942 | -0,43 | -1,34  | 0,41115 | NM_017904       | ARHGAP10     |
| 8103092 | -1,21 | -2,31 | 0,00095 | -1,58 | -3,00  | 0,00522 | NM_024605       | ---          |
| 8120059 | -1,21 | -2,31 | 0,01351 | -1,02 | -2,02  | 0,04469 | ---             | FA2H         |
| 8002792 | -1,21 | -2,31 | 0,01474 | -0,01 | -1,00  | 0,98416 | NM_024306       | KRTAP4-2     |
| 8015242 | -1,21 | -2,31 | 0,21224 | -2,15 | -4,44  | 0,05215 | NM_033062       | ZNF213       |
| 7992854 | -1,21 | -2,31 | 0,01988 | -1,19 | -2,29  | 0,03351 | NM_004220       | PRAMEF1      |
| 7897978 | -1,21 | -2,31 | 0,06564 | -1,44 | -2,71  | 0,02046 | NM_023013       | TSNARE1      |
| 8153304 | -1,21 | -2,31 | 0,06426 | 0,00  | -1,00  | 0,98960 | NM_145003       | LAYN         |
| 7951612 | -1,21 | -2,31 | 0,10550 | -2,02 | -4,06  | 0,00032 | AK293317        | CEACAM5      |
| 8029086 | -1,21 | -2,31 | 0,01443 | -0,13 | -1,10  | 0,64214 | NM_004363       | GPRC5C       |
| 8009639 | -1,21 | -2,31 | 0,08830 | 0,61  | 1,53   | 0,08484 | NM_022036       | FAM90A1      |
| 7960881 | -1,21 | -2,31 | 0,05841 | -1,78 | -3,44  | 0,02652 | NM_018088       | ---          |
| 8045086 | -1,21 | -2,31 | 0,00709 | -1,50 | -2,83  | 0,00326 | ---             | MSLNL        |
| 7998351 | -1,21 | -2,31 | 0,07939 | -1,82 | -3,53  | 0,00880 | NM_001025190    | HMX2         |
| 7931184 | -1,21 | -2,31 | 0,03250 | -0,70 | -1,62  | 0,06299 | NM_005519       | HBZ          |
| 7991754 | -1,21 | -2,31 | 0,12743 | -1,65 | -3,14  | 0,01213 | NM_005332       | P2RX3        |
| 7940005 | -1,21 | -2,31 | 0,16270 | -1,39 | -2,62  | 0,00127 | NM_002559       | ---          |
| 8089723 | -1,21 | -2,31 | 0,02083 | -0,68 | -1,60  | 0,05417 | ---             | ---          |
| 7979741 | -1,21 | -2,31 | 0,17782 | -2,23 | -4,68  | 0,00137 | ---             | POU3F2       |
| 8121209 | -1,21 | -2,31 | 0,03928 | -1,12 | -2,18  | 0,00277 | NM_005604       | PADI3        |
| 7898431 | -1,21 | -2,31 | 0,02908 | -1,30 | -2,45  | 0,00079 | NM_016233       | BCR          |
| 8074730 | -1,21 | -2,31 | 0,10893 | -1,56 | -2,96  | 0,00532 | NM_004327       | NDRG4        |
| 7996219 | -1,21 | -2,31 | 0,00846 | -0,58 | -1,49  | 0,13536 | NM_020465       | TYMP         |
| 8077103 | -1,21 | -2,31 | 0,05029 | -0,18 | -1,13  | 0,65612 | NM_001113756    | ---          |
| 8123313 | -1,21 | -2,31 | 0,01015 | -1,20 | -2,30  | 0,02140 | ---             | ---          |
| 8021993 | -1,21 | -2,31 | 0,01713 | -0,98 | -1,97  | 0,00027 | ---             | GPR27        |
| 8080958 | -1,21 | -2,31 | 0,04714 | -1,01 | -2,02  | 0,06055 | NM_018971       | SLC37A2      |
| 7944931 | -1,21 | -2,31 | 0,01619 | -1,13 | -2,19  | 0,04453 | NM_198277       | ---          |
| 8119107 | -1,21 | -2,31 | 0,05428 | -1,61 | -3,05  | 0,00001 | ---             | KIFC2        |
| 8148867 | -1,21 | -2,31 | 0,00837 | -0,78 | -1,72  | 0,20203 | NM_145754       | GUCY1A2      |
| 7951437 | -1,21 | -2,31 | 0,02625 | -1,69 | -3,23  | 0,00068 | NM_000855       | ALOX15B      |
| 8004784 | -1,21 | -2,32 | 0,01679 | -0,75 | -1,68  | 0,10403 | NM_001141       | ---          |
| 8170237 | -1,21 | -2,32 | 0,14185 | -1,41 | -2,65  | 0,00030 | ---             | UNKL         |
| 7998457 | -1,21 | -2,32 | 0,02914 | -0,30 | -1,23  | 0,62474 | NM_023076       | FAM116B      |
| 8077036 | -1,21 | -2,32 | 0,04414 | -1,12 | -2,17  | 0,02258 | NM_001001794    | EBF2         |
| 8149865 | -1,21 | -2,32 | 0,01364 | -1,36 | -2,56  | 0,00252 | NM_022659       | FLJ45743     |
| 8023437 | -1,21 | -2,32 | 0,02894 | -1,04 | -2,06  | 0,00773 | ENST00000382897 | ---          |
| 7896736 | -1,21 | -2,32 | 0,60614 | -3,79 | -13,84 | 0,03163 | ---             | ---          |
| 8023933 | -1,21 | -2,32 | 0,60614 | -3,79 | -13,84 | 0,03163 | ---             | ---          |
| 8124160 | -1,21 | -2,32 | 0,01258 | -1,25 | -2,38  | 0,00620 | ---             | CATSPER1     |
| 7949553 | -1,21 | -2,32 | 0,04088 | -1,35 | -2,55  | 0,00146 | NM_053054       | ---          |
| 8127690 | -1,21 | -2,32 | 0,05259 | -0,76 | -1,70  | 0,17864 | ---             | C21orf111    |
| 8070900 | -1,21 | -2,32 | 0,07561 | -1,59 | -3,01  | 0,00014 | ENST00000418846 | ASB4         |
| 8134376 | -1,21 | -2,32 | 0,03971 | -0,15 | -1,11  | 0,59748 | NM_016116       | ---          |
| 7954965 | -1,21 | -2,32 | 0,00512 | -0,95 | -1,93  | 0,00897 | ---             | C15orf48     |
| 7983478 | -1,21 | -2,32 | 0,01382 | 1,35  | 2,55   | 0,00452 | NM_032413       | LOC100130071 |
| 7897286 | -1,21 | -2,32 | 0,06266 | -1,02 | -2,03  | 0,00357 | AY358179        | QRFP         |
| 8164630 | -1,21 | -2,32 | 0,05259 | -1,61 | -3,05  | 0,00120 | NM_198180       | APOL3        |
| 8075695 | -1,21 | -2,32 | 0,00011 | -1,25 | -2,38  | 0,00299 | NR_027833       | ---          |
| 8112016 | -1,21 | -2,32 | 0,04136 | -0,92 | -1,89  | 0,00974 | ---             | TMEM176B     |
| 8143790 | -1,21 | -2,32 | 0,04007 | -1,83 | -3,54  | 0,00050 | NM_014020       | ---          |
| 7999433 | -1,21 | -2,32 | 0,02391 | -1,18 | -2,26  | 0,13017 | ---             | FLJ27243     |
| 8001816 | -1,21 | -2,32 | 0,29595 | -2,52 | -5,72  | 0,00136 | ENST00000456054 | IRX4         |
| 8110865 | -1,21 | -2,32 | 0,02318 | -0,95 | -1,93  | 0,05685 | NM_016358       | ---          |
| 8136610 | -1,21 | -2,32 | 0,01775 | -0,88 | -1,83  | 0,00209 | ---             | CD48         |
| 7921667 | -1,21 | -2,32 | 0,00246 | -1,13 | -2,19  | 0,00768 | NM_001778       | ---          |
| 8147373 | -1,21 | -2,32 | 0,04822 | -0,72 | -1,65  | 0,04128 | ---             | LOC440905    |
| 8055143 | -1,21 | -2,32 | 0,06081 | -0,74 | -1,67  | 0,02648 | BC144438        | HCN4         |
| 7990244 | -1,21 | -2,32 | 0,03455 | -0,48 | -1,39  | 0,09320 | NM_005477       | FRG2B        |
| 7937251 | -1,21 | -2,32 | 0,14218 | -2,17 | -4,50  | 0,00555 | NM_001080998    | ---          |
| 8051185 | -1,21 | -2,32 | 0,03869 | -1,40 | -2,63  | 0,00111 | ---             | IL4          |
| 8107977 | -1,21 | -2,32 | 0,07886 | -1,22 | -2,33  | 0,00007 | NM_000589       | DDX54        |

|         |       |       |         |       |       |         |                 |              |
|---------|-------|-------|---------|-------|-------|---------|-----------------|--------------|
| 7958948 | -1,21 | -2,32 | 0,05900 | -2,89 | -7,43 | 0,00036 | NM_00111322     | KRT81        |
| 7963353 | -1,21 | -2,32 | 0,11307 | 1,51  | 2,86  | 0,09215 | NM_002281       | ---          |
| 8152211 | -1,21 | -2,32 | 0,05861 | -0,55 | -1,46 | 0,00493 | ---             | ---          |
| 7932304 | -1,21 | -2,32 | 0,03718 | -1,80 | -3,48 | 0,05447 | ---             | ---          |
| 7995377 | -1,21 | -2,32 | 0,15675 | -2,75 | -6,73 | 0,00099 | ---             | KLHL30       |
| 8049610 | -1,21 | -2,32 | 0,00771 | -1,27 | -2,41 | 0,01494 | NM_198582       | PRRG2        |
| 8030393 | -1,22 | -2,32 | 0,13028 | -0,42 | -1,34 | 0,09318 | NM_000951       | RNF187       |
| 7910372 | -1,22 | -2,32 | 0,03086 | 0,50  | 1,41  | 0,55181 | NM_001010858    | SH2D3C       |
| 8164252 | -1,22 | -2,32 | 0,00812 | -1,24 | -2,36 | 0,02151 | NM_170600       | NGEF         |
| 8059783 | -1,22 | -2,32 | 0,00100 | -0,63 | -1,54 | 0,00483 | NM_019850       | SOAT2        |
| 7955702 | -1,22 | -2,32 | 0,00407 | -1,10 | -2,15 | 0,01427 | NM_003578       | TSPAN32      |
| 7937782 | -1,22 | -2,32 | 0,01201 | -1,50 | -2,82 | 0,00025 | NM_139022       | NOXO1        |
| 7998668 | -1,22 | -2,32 | 0,03210 | -1,64 | -3,12 | 0,00931 | NM_144603       | NANOS2       |
| 8037732 | -1,22 | -2,32 | 0,00850 | -1,81 | -3,50 | 0,00883 | NM_001029861    | PAK4         |
| 8028583 | -1,22 | -2,32 | 0,03867 | 1,28  | 2,42  | 0,06730 | NM_001014831    | FAM196A      |
| 7937007 | -1,22 | -2,32 | 0,00256 | -1,15 | -2,22 | 0,06539 | NM_001039762    | CYP17A1      |
| 7936050 | -1,22 | -2,32 | 0,00510 | -1,00 | -1,99 | 0,04848 | NM_000102       | FAM5B        |
| 7907601 | -1,22 | -2,32 | 0,00335 | -1,96 | -3,90 | 0,00053 | NM_021165       | ---          |
| 7988703 | -1,22 | -2,32 | 0,08138 | -0,51 | -1,43 | 0,09873 | ---             | ---          |
| 8009794 | -1,22 | -2,32 | 0,01661 | -0,73 | -1,66 | 0,00156 | ---             | ---          |
| 8156577 | -1,22 | -2,32 | 0,00479 | -1,20 | -2,29 | 0,08291 | ---             | CACNA1D      |
| 8080511 | -1,22 | -2,32 | 0,02185 | -0,57 | -1,49 | 0,00072 | NM_000720       | FUT2         |
| 8030094 | -1,22 | -2,33 | 0,00953 | 0,32  | 1,25  | 0,13157 | NM_000511       | NGB          |
| 7980352 | -1,22 | -2,33 | 0,01053 | -1,30 | -2,46 | 0,00526 | NM_021257       | ---          |
| 8020209 | -1,22 | -2,33 | 0,00414 | -0,96 | -1,95 | 0,01000 | ---             | ---          |
| 8050441 | -1,22 | -2,33 | 0,21042 | -2,68 | -6,43 | 0,01590 | ---             | ---          |
| 8013177 | -1,22 | -2,33 | 0,00051 | -1,38 | -2,60 | 0,00601 | ---             | PDE6G        |
| 8019231 | -1,22 | -2,33 | 0,13398 | -1,32 | -2,50 | 0,06575 | NM_002602       | ---          |
| 7901445 | -1,22 | -2,33 | 0,03538 | -0,47 | -1,38 | 0,33565 | ---             | ---          |
| 7988465 | -1,22 | -2,33 | 0,06320 | -1,42 | -2,68 | 0,01233 | ---             | NXP1         |
| 8131506 | -1,22 | -2,33 | 0,01956 | -1,51 | -2,84 | 0,00454 | NM_152745       | CSorf50      |
| 8109990 | -1,22 | -2,33 | 0,02209 | -1,86 | -3,64 | 0,00165 | ENST00000330910 | CD8B         |
| 8044154 | -1,22 | -2,33 | 0,06301 | -1,38 | -2,61 | 0,01077 | NM_172099       | ---          |
| 8174045 | -1,22 | -2,33 | 0,02940 | -0,68 | -1,60 | 0,07632 | ---             | WRAP53       |
| 8012270 | -1,22 | -2,33 | 0,04954 | 0,93  | 1,91  | 0,03546 | NM_001143990    | NPTX1        |
| 8019074 | -1,22 | -2,33 | 0,03321 | 0,18  | 1,13  | 0,61281 | NM_002522       | ---          |
| 8168884 | -1,22 | -2,33 | 0,02820 | -0,76 | -1,69 | 0,01183 | ---             | ---          |
| 8056975 | -1,22 | -2,33 | 0,01632 | -1,00 | -2,00 | 0,01633 | ---             | PLS1         |
| 8083146 | -1,22 | -2,33 | 0,00810 | 3,14  | 8,82  | 0,00011 | NM_001172312    | DEFB105A     |
| 8144401 | -1,22 | -2,33 | 0,06434 | -1,59 | -3,01 | 0,00060 | NM_152250       | DEFB105A     |
| 8149235 | -1,22 | -2,33 | 0,06434 | -1,59 | -3,01 | 0,00060 | NM_152250       | ---          |
| 7903292 | -1,22 | -2,33 | 0,00150 | -0,80 | -1,74 | 0,15250 | ---             | TMEM131      |
| 8043745 | -1,22 | -2,33 | 0,03921 | -0,46 | -1,38 | 0,27388 | ENST00000429765 | DHX37        |
| 7967588 | -1,22 | -2,33 | 0,09797 | 0,47  | 1,39  | 0,36707 | NM_032656       | DEFA3        |
| 8149116 | -1,22 | -2,33 | 0,11337 | -1,70 | -3,25 | 0,00061 | NM_005217       | DEFA3        |
| 8149126 | -1,22 | -2,33 | 0,11337 | -1,70 | -3,25 | 0,00061 | NM_005217       | DEFA3        |
| 8149137 | -1,22 | -2,33 | 0,11337 | -1,70 | -3,25 | 0,00061 | NM_005217       | LOC100131826 |
| 8095868 | -1,22 | -2,33 | 0,00153 | -0,67 | -1,59 | 0,01826 | AY358789        | CYP24A1      |
| 8067140 | -1,22 | -2,33 | 0,02202 | 4,64  | 24,85 | 0,00003 | NM_000782       | TNNI2        |
| 7937728 | -1,22 | -2,33 | 0,03326 | -1,61 | -3,05 | 0,00993 | NM_001145829    | ACBD4        |
| 8007730 | -1,22 | -2,33 | 0,04798 | -1,25 | -2,38 | 0,05418 | NM_001135704    | VSIG8        |
| 7921462 | -1,22 | -2,33 | 0,06071 | -0,94 | -1,92 | 0,00278 | NM_001013661    | DEFB103A     |
| 8144473 | -1,22 | -2,33 | 0,02397 | -0,68 | -1,60 | 0,04124 | NM_018661       | DEFB103A     |
| 8149172 | -1,22 | -2,33 | 0,02397 | -0,68 | -1,60 | 0,04124 | NM_018661       | KLHL35       |
| 7950492 | -1,22 | -2,33 | 0,08216 | 0,04  | 1,03  | 0,94905 | NM_001039548    | ---          |
| 8065903 | -1,22 | -2,33 | 0,00789 | -1,20 | -2,30 | 0,00013 | ---             | TMPRSS4      |
| 7944164 | -1,22 | -2,33 | 0,07968 | -1,03 | -2,04 | 0,00379 | NM_019894       | ---          |
| 8040630 | -1,22 | -2,33 | 0,04902 | -1,27 | -2,41 | 0,03974 | ---             | RBM1A1       |
| 8176789 | -1,22 | -2,33 | 0,03108 | -1,26 | -2,40 | 0,00229 | NM_005058       | OR2D2        |
| 7946286 | -1,22 | -2,33 | 0,01074 | -0,77 | -1,70 | 0,01141 | NM_003700       | KCNB1        |
| 8066921 | -1,22 | -2,33 | 0,02084 | -1,01 | -2,02 | 0,06727 | NM_004975       | ---          |
| 7971539 | -1,22 | -2,33 | 0,00371 | -1,07 | -2,10 | 0,04532 | ---             | SCXA         |
| 8148796 | -1,22 | -2,33 | 0,07777 | -1,12 | -2,17 | 0,00254 | NM_001008271    | SCXA         |
| 8148821 | -1,22 | -2,33 | 0,07777 | -1,12 | -2,17 | 0,00254 | NM_001008271    | TNNC2        |
| 8066590 | -1,22 | -2,33 | 0,03610 | -1,53 | -2,89 | 0,03424 | NM_003279       | FCN3         |
| 7914075 | -1,22 | -2,33 | 0,00199 | -0,59 | -1,50 | 0,06412 | NM_003665       | C17orf106    |
| 8010017 | -1,22 | -2,33 | 0,00075 | 0,09  | 1,06  | 0,77459 | NM_001113324    | LOC100129858 |
| 8102871 | -1,22 | -2,33 | 0,00545 | 0,53  | 1,45  | 0,13459 | AK095554        | OR2A2        |
| 8136973 | -1,22 | -2,33 | 0,01417 | -1,64 | -3,12 | 0,00005 | NM_001005480    | GHRH         |
| 8066189 | -1,22 | -2,33 | 0,04428 | -1,52 | -2,87 | 0,00014 | NM_021081       | OR7E19P      |
| 8033744 | -1,22 | -2,33 | 0,04662 | -1,48 | -2,79 | 0,03333 | X89668          | ABCC12       |
| 8001235 | -1,22 | -2,33 | 0,00250 | -1,04 | -2,05 | 0,00032 | NM_033226       | KCNE3        |
| 7950409 | -1,22 | -2,34 | 0,00742 | -2,01 | -4,03 | 0,00138 | NM_005472       | ODF3B        |

|         |       |       |         |       |        |         |                 |           |
|---------|-------|-------|---------|-------|--------|---------|-----------------|-----------|
| 8077116 | -1,22 | -2,34 | 0,11086 | -1,35 | -2,55  | 0,02697 | NM_001014440    | EHD4      |
| 7987772 | -1,22 | -2,34 | 0,00036 | 1,71  | 3,28   | 0,02223 | NM_139265       | ---       |
| 7909140 | -1,22 | -2,34 | 0,07021 | -1,51 | -2,84  | 0,01883 | ---             | NMNAT2    |
| 7922756 | -1,22 | -2,34 | 0,01189 | 1,25  | 2,37   | 0,04387 | NM_015039       | GPRIN3    |
| 8101757 | -1,22 | -2,34 | 0,00246 | -1,62 | -3,07  | 0,03165 | NM_198281       | ANXA8     |
| 7927367 | -1,22 | -2,34 | 0,03421 | -0,95 | -1,94  | 0,00253 | NM_001040084    | FLJ45256  |
| 8000371 | -1,22 | -2,34 | 0,03956 | -0,91 | -1,88  | 0,02459 | AK127191        | GNG8      |
| 8037785 | -1,22 | -2,34 | 0,04299 | -1,84 | -3,57  | 0,00018 | NM_033258       | ---       |
| 8113759 | -1,22 | -2,34 | 0,00081 | -1,46 | -2,75  | 0,00004 | ---             | ANKRD43   |
| 8107992 | -1,22 | -2,34 | 0,04234 | -1,85 | -3,61  | 0,00106 | NM_175873       | OR7A2P    |
| 8034899 | -1,22 | -2,34 | 0,07781 | -1,55 | -2,93  | 0,00073 | ENST00000304105 | ANO7      |
| 8049799 | -1,22 | -2,34 | 0,05582 | -1,47 | -2,78  | 0,03928 | NM_001001891    | MYOZ3     |
| 8109315 | -1,23 | -2,34 | 0,13295 | -1,15 | -2,21  | 0,00229 | NM_001122853    | DPY19L2P4 |
| 8134026 | -1,23 | -2,34 | 0,05986 | -1,13 | -2,20  | 0,00319 | NR_003551       | ---       |
| 7989313 | -1,23 | -2,34 | 0,33545 | -2,49 | -5,63  | 0,04371 | ---             | GLRA3     |
| 8103778 | -1,23 | -2,34 | 0,00049 | -1,36 | -2,57  | 0,00648 | NM_006529       | ---       |
| 8111989 | -1,23 | -2,34 | 0,03440 | -0,15 | -1,11  | 0,61693 | ---             | USH2A     |
| 7924233 | -1,23 | -2,34 | 0,00081 | -1,31 | -2,48  | 0,00001 | NM_206933       | PHF21B    |
| 8076677 | -1,23 | -2,34 | 0,00624 | -1,40 | -2,63  | 0,00134 | NM_138415       | WNT7B     |
| 8076734 | -1,23 | -2,34 | 0,03315 | 0,79  | 1,73   | 0,33425 | NM_058238       | TIMP2     |
| 8018972 | -1,23 | -2,34 | 0,08707 | -0,66 | -1,58  | 0,05462 | AK057217        | FAM129C   |
| 8026787 | -1,23 | -2,34 | 0,25706 | -1,61 | -3,05  | 0,05510 | NM_173544       | FGFBP2    |
| 8099471 | -1,23 | -2,34 | 0,04432 | -0,63 | -1,55  | 0,03831 | NM_031950       | RAB40AL   |
| 8169006 | -1,23 | -2,34 | 0,06144 | -1,41 | -2,65  | 0,09563 | NM_001031834    | FSCN2     |
| 8010614 | -1,23 | -2,34 | 0,03081 | -0,71 | -1,63  | 0,40240 | NM_012418       | C19orf28  |
| 8032608 | -1,23 | -2,34 | 0,08511 | 2,23  | 4,68   | 0,02384 | NM_174983       | HCLS1     |
| 8089911 | -1,23 | -2,34 | 0,01367 | -1,07 | -2,10  | 0,00056 | NM_005335       | ---       |
| 8031439 | -1,23 | -2,34 | 0,02268 | -1,40 | -2,63  | 0,07375 | ---             | TCF7      |
| 8108050 | -1,23 | -2,34 | 0,00012 | -0,42 | -1,34  | 0,19033 | NM_003202       | UGT8      |
| 8097017 | -1,23 | -2,34 | 0,00888 | 3,36  | 10,29  | 0,00010 | NM_001128174    | ---       |
| 8097541 | -1,23 | -2,34 | 0,04955 | -1,25 | -2,38  | 0,00457 | ---             | CCDC96    |
| 8099242 | -1,23 | -2,34 | 0,00042 | -1,02 | -2,02  | 0,02052 | NM_153376       | ---       |
| 7972414 | -1,23 | -2,34 | 0,04054 | -0,98 | -1,97  | 0,01155 | ---             | ---       |
| 8105987 | -1,23 | -2,34 | 0,36173 | -3,77 | -13,59 | 0,00346 | ---             | SAMHD1    |
| 8062339 | -1,23 | -2,34 | 0,04388 | -1,21 | -2,31  | 0,00926 | NM_015474       | XCR1      |
| 8086595 | -1,23 | -2,34 | 0,04523 | -2,12 | -4,36  | 0,00322 | NM_005283       | PROX1     |
| 7909681 | -1,23 | -2,34 | 0,07033 | -1,39 | -2,62  | 0,00112 | NM_002763       | ---       |
| 7910010 | -1,23 | -2,34 | 0,01627 | -1,89 | -3,70  | 0,00140 | ---             | ---       |
| 8074890 | -1,23 | -2,34 | 0,09098 | -0,97 | -1,95  | 0,09332 | ---             | WISP2     |
| 8062864 | -1,23 | -2,34 | 0,03133 | -0,25 | -1,19  | 0,70896 | NM_003881       | LRP2BP    |
| 8103986 | -1,23 | -2,34 | 0,00016 | -0,82 | -1,76  | 0,05919 | NM_018409       | ---       |
| 7968195 | -1,23 | -2,34 | 0,05293 | -1,26 | -2,39  | 0,01746 | ---             | ---       |
| 8074057 | -1,23 | -2,34 | 0,01955 | -0,90 | -1,87  | 0,13791 | ---             | ---       |
| 7985308 | -1,23 | -2,34 | 0,02297 | -1,95 | -3,87  | 0,00002 | ---             | SNORD50B  |
| 8127989 | -1,23 | -2,34 | 0,02125 | -1,35 | -2,56  | 0,03333 | NR_003044       | C22orf26  |
| 8076739 | -1,23 | -2,34 | 0,03459 | -0,90 | -1,86  | 0,01421 | NM_018280       | MUC16     |
| 8033674 | -1,23 | -2,34 | 0,03418 | 1,42  | 2,67   | 0,00064 | NM_024690       | TAAR3     |
| 8129608 | -1,23 | -2,34 | 0,03641 | -0,50 | -1,41  | 0,09241 | NR_028511       | ---       |
| 8176951 | -1,23 | -2,34 | 0,00470 | -0,73 | -1,66  | 0,12697 | ---             | MTSS1L    |
| 7997135 | -1,23 | -2,34 | 0,07995 | -1,46 | -2,75  | 0,00312 | NM_138383       | ---       |
| 8121487 | -1,23 | -2,35 | 0,05159 | -0,84 | -1,78  | 0,02235 | ---             | H2AFB1    |
| 8170994 | -1,23 | -2,35 | 0,00215 | -0,58 | -1,49  | 0,05403 | NM_001017990    | H2AFB1    |
| 8176249 | -1,23 | -2,35 | 0,00215 | -0,58 | -1,49  | 0,05403 | NM_001017990    | KIF1A     |
| 8060134 | -1,23 | -2,35 | 0,00426 | 0,11  | 1,08   | 0,79348 | NM_004321       | MAS1      |
| 8123176 | -1,23 | -2,35 | 0,00246 | -0,89 | -1,85  | 0,00449 | NM_002377       | ---       |
| 8137006 | -1,23 | -2,35 | 0,15123 | -1,01 | -2,02  | 0,00051 | ---             | PCK1      |
| 8063590 | -1,23 | -2,35 | 0,01849 | -1,19 | -2,28  | 0,01007 | NM_002591       | OR10R3P   |
| 7906370 | -1,23 | -2,35 | 0,02315 | -1,87 | -3,65  | 0,01083 | AK122667        | C3orf20   |
| 8078046 | -1,23 | -2,35 | 0,00569 | -1,01 | -2,01  | 0,05012 | BC038406        | XDH       |
| 8051322 | -1,23 | -2,35 | 0,01997 | -0,90 | -1,87  | 0,05394 | NM_000379       | THSD7B    |
| 8045470 | -1,23 | -2,35 | 0,04436 | -1,16 | -2,24  | 0,00008 | NM_001080427    | SPDYE8P   |
| 8139996 | -1,23 | -2,35 | 0,20400 | -2,45 | -5,48  | 0,00034 | NR_003664       | ---       |
| 7993606 | -1,23 | -2,35 | 0,00728 | -0,76 | -1,70  | 0,03774 | ---             | ---       |
| 8008967 | -1,23 | -2,35 | 0,14376 | -1,61 | -3,05  | 0,01897 | ---             | LHX1      |
| 8006681 | -1,23 | -2,35 | 0,02726 | 0,08  | 1,06   | 0,85271 | NM_005568       | OR4K1     |
| 7973016 | -1,23 | -2,35 | 0,02371 | -1,03 | -2,04  | 0,07776 | NM_001004063    | ---       |
| 7928819 | -1,23 | -2,35 | 0,07971 | -1,42 | -2,67  | 0,00603 | ---             | ST8SIA1   |
| 7961755 | -1,23 | -2,35 | 0,05119 | -1,11 | -2,16  | 0,00033 | NM_003034       | ATP2B2    |
| 8085311 | -1,23 | -2,35 | 0,03163 | -1,63 | -3,08  | 0,01237 | NM_001001331    | MOS       |
| 8150879 | -1,23 | -2,35 | 0,09195 | -1,53 | -2,89  | 0,09304 | NM_005372       | KRTAP4-1  |
| 8015247 | -1,23 | -2,35 | 0,10348 | -1,39 | -2,61  | 0,00625 | NM_033060       | HEPACAM   |
| 7952475 | -1,23 | -2,35 | 0,04598 | -1,72 | -3,29  | 0,00298 | NM_152722       | ---       |
| 7982533 | -1,23 | -2,35 | 0,01943 | -0,88 | -1,83  | 0,01108 | ---             | CRISP1    |

|         |       |       |         |       |       |         |                 |              |
|---------|-------|-------|---------|-------|-------|---------|-----------------|--------------|
| 8126920 | -1,23 | -2,35 | 0,01771 | -1,79 | -3,46 | 0,00036 | NM_001131       | ---          |
| 7928556 | -1,23 | -2,35 | 0,01810 | -2,00 | -4,00 | 0,00517 | ---             | SSTR1        |
| 7974047 | -1,23 | -2,35 | 0,05131 | -2,57 | -5,93 | 0,00026 | NM_001049       | REC8         |
| 7973629 | -1,23 | -2,35 | 0,00112 | -1,19 | -2,29 | 0,00064 | NM_001048205    | HAMP         |
| 8027819 | -1,23 | -2,35 | 0,11723 | -1,42 | -2,67 | 0,02828 | NM_021175       | ---          |
| 7899560 | -1,23 | -2,35 | 0,24791 | -1,62 | -3,08 | 0,00272 | ---             | ---          |
| 7947394 | -1,23 | -2,35 | 0,01642 | -1,57 | -2,98 | 0,00037 | ---             | ZNF662       |
| 8079124 | -1,23 | -2,35 | 0,00627 | -1,38 | -2,60 | 0,00002 | NM_207404       | FLJ41170     |
| 7976828 | -1,23 | -2,35 | 0,04575 | -1,51 | -2,86 | 0,00208 | AK123165        | C19orf70     |
| 8032996 | -1,23 | -2,35 | 0,03377 | -1,22 | -2,33 | 0,00513 | NM_205767       | KIR2DL3      |
| 8031277 | -1,23 | -2,35 | 0,16583 | -2,45 | -5,46 | 0,00009 | NM_015868       | BRSK1        |
| 8031441 | -1,23 | -2,35 | 0,01311 | -0,25 | -1,19 | 0,46083 | NM_032430       | TUSC1        |
| 8160472 | -1,23 | -2,35 | 0,06357 | -1,38 | -2,60 | 0,00604 | NM_001004125    | CD2          |
| 7904287 | -1,23 | -2,35 | 0,00048 | -1,03 | -2,04 | 0,00030 | NM_001767       | DUSP21       |
| 8166950 | -1,23 | -2,35 | 0,00164 | -0,93 | -1,91 | 0,00679 | NM_022076       | GPC2         |
| 8141466 | -1,23 | -2,35 | 0,02102 | -1,94 | -3,84 | 0,00057 | NM_152742       | WNT16        |
| 8135763 | -1,23 | -2,35 | 0,03456 | -0,75 | -1,68 | 0,10443 | NM_057168       | OPN1MW2      |
| 8170825 | -1,23 | -2,35 | 0,02002 | -1,47 | -2,78 | 0,00870 | NM_001048181    | HS6ST1       |
| 8055130 | -1,23 | -2,35 | 0,00743 | -0,60 | -1,51 | 0,31018 | NM_004807       | ALOX12P2     |
| 8004201 | -1,23 | -2,35 | 0,03850 | 0,39  | 1,31  | 0,20056 | NR_002710       | GINS4        |
| 8146130 | -1,23 | -2,35 | 0,03149 | -0,86 | -1,81 | 0,02784 | NM_032336       | PALM3        |
| 8034744 | -1,23 | -2,35 | 0,00056 | -1,04 | -2,05 | 0,05021 | NM_001145028    | LOC100131796 |
| 7989951 | -1,24 | -2,35 | 0,00225 | -0,97 | -1,96 | 0,23214 | ENST00000380078 | C20orf173    |
| 8065911 | -1,24 | -2,35 | 0,04425 | -1,19 | -2,28 | 0,01678 | BC112060        | GCGR         |
| 8019669 | -1,24 | -2,35 | 0,00855 | -1,69 | -3,22 | 0,00607 | NM_000160       | PACSIN3      |
| 7947801 | -1,24 | -2,36 | 0,01559 | -0,22 | -1,17 | 0,65314 | NM_016223       | ZNF580       |
| 8031516 | -1,24 | -2,36 | 0,01813 | -0,70 | -1,63 | 0,12305 | NM_016202       | PRB4         |
| 7961269 | -1,24 | -2,36 | 0,02296 | -1,16 | -2,23 | 0,01240 | NM_002723       | ---          |
| 8052305 | -1,24 | -2,36 | 0,06650 | -1,07 | -2,10 | 0,02022 | ---             | GSDMB        |
| 8014903 | -1,24 | -2,36 | 0,00510 | -0,36 | -1,29 | 0,39566 | NM_001165958    | SHE          |
| 7920506 | -1,24 | -2,36 | 0,02911 | -1,50 | -2,83 | 0,00183 | NM_001010846    | IRGC         |
| 8029318 | -1,24 | -2,36 | 0,02460 | -1,18 | -2,26 | 0,00231 | NM_019612       | CD7          |
| 8019478 | -1,24 | -2,36 | 0,04651 | -1,15 | -2,22 | 0,10590 | NM_006137       | ---          |
| 8095562 | -1,24 | -2,36 | 0,00442 | -1,10 | -2,15 | 0,01665 | ---             | RBM38        |
| 8063583 | -1,24 | -2,36 | 0,01691 | -1,05 | -2,08 | 0,04328 | NM_017495       | ---          |
| 8014863 | -1,24 | -2,36 | 0,01359 | -0,67 | -1,59 | 0,08116 | ---             | ---          |
| 7997137 | -1,24 | -2,36 | 0,00431 | -1,66 | -3,16 | 0,02806 | ---             | FRMPD3       |
| 8169235 | -1,24 | -2,36 | 0,04077 | -0,04 | -1,03 | 0,82785 | ENST00000276185 | ---          |
| 8175193 | -1,24 | -2,36 | 0,05009 | -1,06 | -2,09 | 0,07086 | ---             | DHRS2        |
| 7973433 | -1,24 | -2,36 | 0,00582 | -1,01 | -2,02 | 0,01236 | NM_182908       | ZAN          |
| 8134915 | -1,24 | -2,36 | 0,02755 | -0,89 | -1,85 | 0,00637 | NM_003386       | ITPKA        |
| 7982927 | -1,24 | -2,36 | 0,02376 | -0,97 | -1,96 | 0,09108 | NM_002220       | ADAM8        |
| 7937150 | -1,24 | -2,36 | 0,04355 | -0,54 | -1,45 | 0,29043 | NM_001109       | LST1         |
| 8118149 | -1,24 | -2,36 | 0,04998 | -0,24 | -1,18 | 0,52424 | NM_205837       | LST1         |
| 8177988 | -1,24 | -2,36 | 0,04998 | -0,24 | -1,18 | 0,52424 | NM_205837       | LST1         |
| 8179268 | -1,24 | -2,36 | 0,04998 | -0,24 | -1,18 | 0,52424 | NM_205837       | HTR4         |
| 8114977 | -1,24 | -2,36 | 0,00866 | -1,59 | -3,00 | 0,00020 | NM_001040172    | LBX1         |
| 7935855 | -1,24 | -2,36 | 0,11528 | -1,58 | -2,99 | 0,00418 | NM_006562       | ---          |
| 8000649 | -1,24 | -2,36 | 0,04255 | -2,39 | -5,25 | 0,00042 | ---             | ---          |
| 8000690 | -1,24 | -2,36 | 0,04255 | -2,39 | -5,25 | 0,00042 | ---             | SPIN2A       |
| 8173198 | -1,24 | -2,36 | 0,14144 | -1,86 | -3,63 | 0,00549 | NM_019003       | UNC5A        |
| 8110237 | -1,24 | -2,36 | 0,01107 | 0,64  | 1,56  | 0,14804 | NM_133369       | ---          |
| 8065067 | -1,24 | -2,36 | 0,00155 | -1,24 | -2,36 | 0,00049 | ---             | CEP72        |
| 8104220 | -1,24 | -2,36 | 0,13046 | 1,05  | 2,07  | 0,08477 | NM_018140       | ---          |
| 8053447 | -1,24 | -2,36 | 0,10384 | -2,06 | -4,16 | 0,00436 | ---             | MYO3B        |
| 8046238 | -1,24 | -2,36 | 0,03612 | -0,53 | -1,44 | 0,11797 | NM_138995       | PNMA5        |
| 8175763 | -1,24 | -2,36 | 0,03037 | -1,18 | -2,26 | 0,06226 | NM_001103151    | PIK3CD       |
| 7897482 | -1,24 | -2,36 | 0,00655 | -0,66 | -1,58 | 0,25925 | NM_005026       | HOMER3       |
| 8035566 | -1,24 | -2,36 | 0,03337 | -1,18 | -2,27 | 0,03349 | NM_004838       | SIGLEC10     |
| 8038824 | -1,24 | -2,36 | 0,06291 | -1,48 | -2,80 | 0,02338 | NM_033130       | SLC25A31     |
| 8097327 | -1,24 | -2,36 | 0,00124 | -0,84 | -1,79 | 0,03148 | NM_031291       | FAM181B      |
| 7950726 | -1,24 | -2,36 | 0,06540 | -1,99 | -3,97 | 0,00001 | NM_175885       | ARHGAP4      |
| 8175900 | -1,24 | -2,36 | 0,05106 | -0,98 | -1,97 | 0,00969 | NM_001164741    | ---          |
| 8092763 | -1,24 | -2,36 | 0,00228 | -1,21 | -2,31 | 0,01262 | ---             | C22orf36     |
| 8075016 | -1,24 | -2,36 | 0,02400 | -1,38 | -2,61 | 0,06688 | NM_207644       | KRT84        |
| 7963375 | -1,24 | -2,36 | 0,04469 | -1,20 | -2,29 | 0,09129 | NM_033045       | ACHE         |
| 8141648 | -1,24 | -2,36 | 0,00037 | -1,16 | -2,24 | 0,00206 | NM_015831       | CARKD        |
| 7972808 | -1,24 | -2,36 | 0,02220 | -1,16 | -2,24 | 0,00661 | NM_018210       | CD300C       |
| 8018177 | -1,24 | -2,36 | 0,02717 | -0,89 | -1,85 | 0,04371 | NM_006678       | OR10X1       |
| 7921364 | -1,24 | -2,36 | 0,01394 | -0,83 | -1,77 | 0,00161 | NM_001004477    | NEUROG1      |
| 8114245 | -1,24 | -2,36 | 0,04965 | -2,70 | -6,50 | 0,00291 | NM_006161       | CPLX4        |
| 8023554 | -1,24 | -2,36 | 0,02975 | -1,61 | -3,05 | 0,00083 | NM_181654       | ---          |
| 8083407 | -1,24 | -2,36 | 0,00167 | -1,46 | -2,75 | 0,02101 | ---             | PGLYRP1      |

|         |       |       |         |       |       |         |                  |           |
|---------|-------|-------|---------|-------|-------|---------|------------------|-----------|
| 8037742 | -1,24 | -2,36 | 0,06387 | -1,77 | -3,42 | 0,00315 | NM_005091        | C4orf38   |
| 8103867 | -1,24 | -2,36 | 0,04641 | -1,21 | -2,32 | 0,11699 | NR_024008        | ---       |
| 8094068 | -1,24 | -2,36 | 0,00774 | -1,61 | -3,04 | 0,00309 | ---              | ---       |
| 8151494 | -1,24 | -2,36 | 0,08240 | -1,89 | -3,71 | 0,00482 | ---              | ABHD8     |
| 8035271 | -1,24 | -2,36 | 0,01150 | -0,30 | -1,23 | 0,32509 | NM_024527        | KCNK7     |
| 7949444 | -1,24 | -2,36 | 0,00188 | -1,00 | -1,99 | 0,05485 | NM_005714        | REM2      |
| 7973363 | -1,24 | -2,36 | 0,00693 | 0,02  | 1,02  | 0,94067 | NM_173527        | ---       |
| 8105179 | -1,24 | -2,37 | 0,01954 | -2,17 | -4,51 | 0,00026 | ---              | KRTAP5-6  |
| 7937709 | -1,24 | -2,37 | 0,05981 | -0,95 | -1,94 | 0,17934 | NM_001012416     | C21orf118 |
| 8068046 | -1,24 | -2,37 | 0,00066 | -1,07 | -2,10 | 0,00935 | AF304442         | FBXW9     |
| 8034469 | -1,24 | -2,37 | 0,00905 | -0,93 | -1,90 | 0,01888 | NM_032301        | ---       |
| 7921425 | -1,24 | -2,37 | 0,01815 | -1,99 | -3,96 | 0,00881 | ---              | TSPY1     |
| 8176508 | -1,24 | -2,37 | 0,06301 | -1,34 | -2,52 | 0,00024 | NM_003308        | CHP2      |
| 7994123 | -1,24 | -2,37 | 0,00685 | -1,00 | -2,00 | 0,03743 | NM_022097        | C15orf5   |
| 7990636 | -1,24 | -2,37 | 0,03897 | -0,87 | -1,82 | 0,09199 | NR_026813        | PAPL      |
| 8028570 | -1,24 | -2,37 | 0,00267 | -0,68 | -1,60 | 0,12815 | NM_001004318     | ---       |
| 8096002 | -1,24 | -2,37 | 0,02090 | -0,77 | -1,71 | 0,00359 | ---              | DNAJB13   |
| 7942489 | -1,24 | -2,37 | 0,00293 | -1,03 | -2,05 | 0,01025 | NM_153614        | OR1L1     |
| 8157681 | -1,24 | -2,37 | 0,01382 | -1,46 | -2,75 | 0,00769 | NM_001005236     | SLC6A11   |
| 8077817 | -1,24 | -2,37 | 0,07750 | 0,93  | 1,90  | 0,01003 | NM_014229        | WDR90     |
| 7991939 | -1,24 | -2,37 | 0,00342 | -1,52 | -2,86 | 0,00077 | NM_145294        | TMC5      |
| 7993638 | -1,24 | -2,37 | 0,00706 | 3,60  | 12,16 | 0,00002 | NM_001105248     | KRTAP24-1 |
| 8069800 | -1,24 | -2,37 | 0,26084 | -2,09 | -4,25 | 0,01483 | NM_001085455     | H1FNT     |
| 7955112 | -1,24 | -2,37 | 0,05358 | -1,50 | -2,82 | 0,00098 | NM_181788        | CMA1      |
| 7978343 | -1,24 | -2,37 | 0,01735 | -1,10 | -2,15 | 0,01905 | NM_001836        | LRRFIP1   |
| 8049532 | -1,24 | -2,37 | 0,00546 | -1,01 | -2,02 | 0,03387 | NM_001137550     | LEFTY2    |
| 7924682 | -1,24 | -2,37 | 0,16084 | -1,66 | -3,17 | 0,03317 | NM_003240        | ALKBH4    |
| 8141757 | -1,24 | -2,37 | 0,02806 | -1,70 | -3,26 | 0,00638 | NM_017621        | RAB37     |
| 8009666 | -1,24 | -2,37 | 0,01043 | -0,59 | -1,51 | 0,18433 | NM_175738        | SNORA30   |
| 7994926 | -1,24 | -2,37 | 0,00028 | -1,31 | -2,49 | 0,00892 | NR_002966        | SULT1E1   |
| 8100808 | -1,25 | -2,37 | 0,00117 | -0,59 | -1,51 | 0,19421 | NM_005420        | FAM73B    |
| 8158492 | -1,25 | -2,37 | 0,01261 | -0,20 | -1,15 | 0,64515 | BC009114         | FXD2      |
| 7951966 | -1,25 | -2,37 | 0,06767 | -1,34 | -2,53 | 0,00771 | NM_001127489     | KLHL10    |
| 8007169 | -1,25 | -2,37 | 0,00890 | -1,08 | -2,12 | 0,00246 | NM_152467        | ---       |
| 7976146 | -1,25 | -2,37 | 0,27084 | -0,72 | -1,64 | 0,20761 | ---              | MARVELD3  |
| 7997158 | -1,25 | -2,37 | 0,01336 | -0,31 | -1,24 | 0,44624 | NM_001017967     | GPR112    |
| 8170135 | -1,25 | -2,37 | 0,06039 | -1,17 | -2,26 | 0,03476 | NM_153834        | GALNT8    |
| 7953252 | -1,25 | -2,37 | 0,03663 | -0,93 | -1,90 | 0,01320 | NM_017417        | CLV51     |
| 8146618 | -1,25 | -2,37 | 0,02498 | -1,36 | -2,56 | 0,00857 | NM_173519        | KRTAP19-4 |
| 8069836 | -1,25 | -2,37 | 0,00252 | -0,89 | -1,86 | 0,04527 | NM_181610        | KIAA1274  |
| 7928126 | -1,25 | -2,37 | 0,01284 | 0,10  | 1,07  | 0,86060 | NM_014431        | ---       |
| 7934365 | -1,25 | -2,37 | 0,03613 | -1,16 | -2,24 | 0,00069 | ---              | PKLR      |
| 7920744 | -1,25 | -2,37 | 0,05752 | -2,20 | -4,59 | 0,00081 | NM_000298        | LOC391769 |
| 8111216 | -1,25 | -2,37 | 0,14161 | -2,73 | -6,65 | 0,00068 | ENST000000426411 | BEST4     |
| 7915598 | -1,25 | -2,37 | 0,00037 | -1,03 | -2,05 | 0,02455 | NM_153274        | HBB       |
| 7946033 | -1,25 | -2,37 | 0,02262 | -1,72 | -3,29 | 0,00304 | NM_000518        | LOC286359 |
| 8162674 | -1,25 | -2,37 | 0,06194 | -0,63 | -1,55 | 0,01301 | NR_026847        | CBFA2T3   |
| 8003425 | -1,25 | -2,37 | 0,02238 | -1,00 | -2,00 | 0,00062 | NM_005187        | ---       |
| 8007259 | -1,25 | -2,37 | 0,30864 | -1,29 | -2,44 | 0,01309 | ---              | TEX28     |
| 8176018 | -1,25 | -2,37 | 0,03139 | -1,93 | -3,80 | 0,00116 | NM_001586        | PEBP4     |
| 8149725 | -1,25 | -2,37 | 0,00203 | 0,38  | 1,30  | 0,28839 | NM_144962        | ODAM      |
| 8095456 | -1,25 | -2,37 | 0,07244 | -1,09 | -2,13 | 0,00457 | NM_017855        | CORL2     |
| 8023184 | -1,25 | -2,37 | 0,06262 | -2,15 | -4,44 | 0,00051 | AY669508         | MIR192    |
| 7949273 | -1,25 | -2,38 | 0,08819 | -1,05 | -2,08 | 0,09388 | NR_029578        | MEIS3     |
| 8037878 | -1,25 | -2,38 | 0,09411 | -1,64 | -3,12 | 0,00281 | NM_020160        | LMF2      |
| 8077082 | -1,25 | -2,38 | 0,00280 | 0,46  | 1,37  | 0,43877 | NM_033200        | GRIN3A    |
| 8162908 | -1,25 | -2,38 | 0,00044 | -1,46 | -2,76 | 0,00509 | NM_133445        | RBMY1A1   |
| 8176766 | -1,25 | -2,38 | 0,02529 | -1,27 | -2,42 | 0,00893 | NM_005058        | PASD1     |
| 8170488 | -1,25 | -2,38 | 0,04516 | -0,82 | -1,76 | 0,01854 | NM_173493        | RN28S1    |
| 7917645 | -1,25 | -2,38 | 0,02793 | -3,12 | -8,70 | 0,00084 | NR_003287        | ---       |
| 8095137 | -1,25 | -2,38 | 0,02015 | -1,53 | -2,88 | 0,00151 | ---              | ---       |
| 8122125 | -1,25 | -2,38 | 0,01216 | -0,81 | -1,75 | 0,00242 | ---              | DTHD1     |
| 8094533 | -1,25 | -2,38 | 0,01653 | -1,37 | -2,59 | 0,00394 | NM_001136536     | FLJ44896  |
| 8110676 | -1,25 | -2,38 | 0,06831 | -1,15 | -2,22 | 0,23726 | AK126844         | ANXA8L1   |
| 7933312 | -1,25 | -2,38 | 0,11294 | -1,19 | -2,29 | 0,00095 | NM_001098845     | GABRQ     |
| 8170538 | -1,25 | -2,38 | 0,00906 | 1,02  | 2,03  | 0,04977 | NM_018558        | STMN1     |
| 7913864 | -1,25 | -2,38 | 0,00398 | -0,60 | -1,51 | 0,13498 | NM_001145454     | ---       |
| 7948123 | -1,25 | -2,38 | 0,08994 | -0,98 | -1,98 | 0,06547 | ---              | ---       |
| 7993112 | -1,25 | -2,38 | 0,00272 | -1,64 | -3,11 | 0,00017 | ---              | C2CD4B    |
| 7989473 | -1,25 | -2,38 | 0,07369 | -1,45 | -2,73 | 0,02946 | NM_001007595     | ---       |
| 7985918 | -1,25 | -2,38 | 0,27681 | -0,55 | -1,47 | 0,12660 | ---              | C5orf48   |
| 8107702 | -1,25 | -2,38 | 0,00155 | -0,74 | -1,67 | 0,12878 | BC130495         | C14orf25  |
| 7974008 | -1,25 | -2,38 | 0,01244 | -0,39 | -1,31 | 0,00138 | BC038110         | OR2H2     |

|         |       |       |         |       |        |         |                 |           |
|---------|-------|-------|---------|-------|--------|---------|-----------------|-----------|
| 8117741 | -1,25 | -2,38 | 0,05645 | -2,04 | -4,11  | 0,00061 | NM_007160       | RPL3L     |
| 7998643 | -1,25 | -2,38 | 0,18959 | -2,48 | -5,59  | 0,00091 | NM_005061       | ZICS      |
| 7972567 | -1,25 | -2,38 | 0,00396 | -1,17 | -2,25  | 0,06982 | NM_033132       | CALML4    |
| 7989968 | -1,25 | -2,38 | 0,02622 | -0,14 | -1,10  | 0,75299 | NM_033429       | MGRPRD    |
| 7950003 | -1,25 | -2,38 | 0,00437 | -1,94 | -3,83  | 0,02686 | NM_198923       | ---       |
| 8119527 | -1,25 | -2,38 | 0,00654 | -0,81 | -1,75  | 0,02079 | ---             | ---       |
| 8045319 | -1,25 | -2,38 | 0,15133 | -2,58 | -5,99  | 0,00072 | ---             | ---       |
| 8055234 | -1,25 | -2,38 | 0,15133 | -2,58 | -5,99  | 0,00072 | ---             | ---       |
| 7957495 | -1,25 | -2,38 | 0,00734 | -2,35 | -5,10  | 0,00073 | ---             | ---       |
| 8121159 | -1,25 | -2,38 | 0,14205 | -0,63 | -1,55  | 0,00272 | ---             | ---       |
| 8045347 | -1,25 | -2,38 | 0,06235 | -0,91 | -1,88  | 0,00282 | ---             | FGFR4     |
| 8110265 | -1,25 | -2,38 | 0,01120 | 1,23  | 2,35   | 0,15960 | NM_213647       | ---       |
| 8099240 | -1,25 | -2,38 | 0,07008 | -2,48 | -5,58  | 0,04799 | ---             | ---       |
| 7923162 | -1,25 | -2,38 | 0,00932 | -1,49 | -2,80  | 0,00658 | ---             | VWA2      |
| 7930663 | -1,25 | -2,38 | 0,00305 | -1,69 | -3,22  | 0,00144 | NM_198496       | EIF5A     |
| 8004325 | -1,25 | -2,38 | 0,08150 | -1,82 | -3,53  | 0,01327 | NM_001143760    | TSPY1     |
| 8176484 | -1,25 | -2,38 | 0,05058 | -1,36 | -2,57  | 0,00011 | NM_003308       | STK32C    |
| 7937089 | -1,25 | -2,38 | 0,00688 | 0,39  | 1,31   | 0,23650 | NM_173575       | PNCK      |
| 8175815 | -1,25 | -2,38 | 0,01690 | -1,75 | -3,37  | 0,01022 | NM_001039582    | ANKRD30B  |
| 8020357 | -1,25 | -2,38 | 0,13503 | -0,91 | -1,88  | 0,00432 | NM_001145029    | HOXD9     |
| 8046542 | -1,25 | -2,38 | 0,03666 | -1,10 | -2,14  | 0,02502 | NM_014213       | LMO2      |
| 7947450 | -1,25 | -2,38 | 0,02054 | -1,12 | -2,17  | 0,01379 | NM_005574       | ZAP70     |
| 8043725 | -1,25 | -2,38 | 0,01090 | -1,05 | -2,07  | 0,02277 | NM_001079       | ---       |
| 7902700 | -1,25 | -2,38 | 0,02023 | -1,43 | -2,69  | 0,00683 | ---             | EFCAB4B   |
| 7960370 | -1,25 | -2,38 | 0,02822 | -1,52 | -2,88  | 0,02387 | NM_032680       | C15orf32  |
| 7986239 | -1,25 | -2,38 | 0,01001 | -1,11 | -2,16  | 0,00133 | BC109252        | LOC642864 |
| 7903561 | -1,25 | -2,38 | 0,00378 | -1,20 | -2,30  | 0,00813 | AY312144        | GPR139    |
| 7999916 | -1,25 | -2,38 | 0,11602 | -1,52 | -2,87  | 0,00480 | NM_001002911    | MTG1      |
| 7931607 | -1,25 | -2,38 | 0,03308 | 0,16  | 1,12   | 0,72683 | NM_138384       | USP17     |
| 8094130 | -1,25 | -2,38 | 0,48324 | -3,40 | -10,59 | 0,00025 | NM_001105662    | USH1C     |
| 7946903 | -1,25 | -2,38 | 0,01649 | 0,60  | 1,52   | 0,02023 | NM_153676       | RBPJL     |
| 8062948 | -1,25 | -2,38 | 0,02591 | -1,08 | -2,11  | 0,05884 | NM_014276       | ---       |
| 8019875 | -1,25 | -2,39 | 0,00501 | -1,44 | -2,71  | 0,00530 | ---             | CMKLR1    |
| 7966089 | -1,25 | -2,39 | 0,01404 | -0,99 | -1,99  | 0,12012 | NM_001142343    | TEX28     |
| 8176006 | -1,25 | -2,39 | 0,02282 | -1,90 | -3,72  | 0,00132 | NM_001586       | TEX28     |
| 8176012 | -1,25 | -2,39 | 0,02282 | -1,90 | -3,72  | 0,00132 | NM_001586       | SLC16A11  |
| 8012006 | -1,25 | -2,39 | 0,04124 | -0,88 | -1,85  | 0,07056 | NM_153357       | CD79A     |
| 8029136 | -1,25 | -2,39 | 0,00018 | -0,39 | -1,31  | 0,11894 | NM_001783       | FOXI2     |
| 7931348 | -1,26 | -2,39 | 0,01373 | -1,60 | -3,03  | 0,00158 | NM_207426       | TRIM63    |
| 7913907 | -1,26 | -2,39 | 0,02838 | -0,73 | -1,66  | 0,04856 | NM_032588       | ---       |
| 8070712 | -1,26 | -2,39 | 0,00062 | -1,39 | -2,62  | 0,02425 | ---             | KIAA0895L |
| 8001946 | -1,26 | -2,39 | 0,05089 | 1,58  | 2,98   | 0,00602 | NM_001040715    | ---       |
| 8006319 | -1,26 | -2,39 | 0,12986 | -1,49 | -2,80  | 0,15755 | ---             | PMCHL2    |
| 8106019 | -1,26 | -2,39 | 0,00080 | -1,62 | -3,08  | 0,06636 | NR_003922       | ---       |
| 8154283 | -1,26 | -2,39 | 0,00545 | -1,30 | -2,46  | 0,00335 | ---             | LOC728800 |
| 7986336 | -1,26 | -2,39 | 0,03037 | -1,42 | -2,67  | 0,01116 | ENST00000444787 | TAAR9     |
| 8122127 | -1,26 | -2,39 | 0,00857 | -1,48 | -2,78  | 0,01506 | NM_175057       | C11orf35  |
| 7945445 | -1,26 | -2,39 | 0,16571 | -1,17 | -2,26  | 0,10229 | NM_173573       | CHRNA10   |
| 7945896 | -1,26 | -2,39 | 0,01351 | -1,67 | -3,18  | 0,01624 | NM_020402       | ---       |
| 7981375 | -1,26 | -2,39 | 0,01537 | -0,66 | -1,58  | 0,02119 | ---             | C8orf47   |
| 8147543 | -1,26 | -2,39 | 0,00163 | -1,12 | -2,17  | 0,02338 | NM_173549       | ---       |
| 8045497 | -1,26 | -2,39 | 0,00004 | -2,02 | -4,04  | 0,00437 | ---             | ---       |
| 8090446 | -1,26 | -2,39 | 0,10962 | -1,78 | -3,44  | 0,00062 | ---             | PLA2G6    |
| 8076025 | -1,26 | -2,39 | 0,00822 | -1,08 | -2,12  | 0,00122 | NM_003560       | LOC401296 |
| 8137802 | -1,26 | -2,39 | 0,06542 | -1,68 | -3,20  | 0,01289 | ENST00000382528 | GLP2R     |
| 8004922 | -1,26 | -2,39 | 0,00783 | -0,89 | -1,86  | 0,00211 | NM_004246       | WNK2      |
| 8156415 | -1,26 | -2,39 | 0,04383 | -0,23 | -1,17  | 0,61213 | NM_006648       | ---       |
| 7935861 | -1,26 | -2,39 | 0,02664 | -0,85 | -1,80  | 0,00952 | ---             | OR6B1     |
| 8136965 | -1,26 | -2,39 | 0,03821 | -1,33 | -2,52  | 0,05213 | NM_001005281    | ADAD2     |
| 8003145 | -1,26 | -2,39 | 0,14683 | -0,68 | -1,60  | 0,00328 | NM_139174       | ---       |
| 8045585 | -1,26 | -2,39 | 0,00806 | -0,87 | -1,83  | 0,02520 | ---             | C6orf168  |
| 8128371 | -1,26 | -2,39 | 0,01783 | 1,33  | 2,51   | 0,00054 | NM_032511       | HLA-DOA   |
| 8180093 | -1,26 | -2,39 | 0,02033 | -2,46 | -5,49  | 0,00043 | NM_002119       | TSPY1     |
| 8176517 | -1,26 | -2,39 | 0,07990 | -1,16 | -2,24  | 0,00042 | NM_003308       | ---       |
| 8176566 | -1,26 | -2,39 | 0,19157 | -2,70 | -6,48  | 0,02091 | ---             | RBMV1A1   |
| 8177331 | -1,26 | -2,39 | 0,02238 | -1,27 | -2,40  | 0,00376 | NM_005058       | FAM163A   |
| 7907769 | -1,26 | -2,39 | 0,08465 | -2,00 | -4,00  | 0,01872 | NM_173509       | COL5A1    |
| 8159142 | -1,26 | -2,39 | 0,05995 | -2,03 | -4,09  | 0,00061 | NM_000093       | SLC9A5    |
| 7996498 | -1,26 | -2,39 | 0,05987 | 0,73  | 1,66   | 0,05789 | NM_004594       | ---       |
| 8122658 | -1,26 | -2,40 | 0,00435 | -1,67 | -3,18  | 0,00004 | ---             | ---       |
| 7974585 | -1,26 | -2,40 | 0,07917 | -1,48 | -2,80  | 0,02640 | ---             | NR6A1     |
| 8164087 | -1,26 | -2,40 | 0,00280 | 1,62  | 3,07   | 0,00406 | NM_033334       | PITX2     |
| 8102352 | -1,26 | -2,40 | 0,03973 | -1,37 | -2,59  | 0,00002 | NM_153426       | ---       |

|         |       |       |         |       |        |         |                 |              |  |
|---------|-------|-------|---------|-------|--------|---------|-----------------|--------------|--|
| 8003859 | -1,26 | -2,40 | 0,16426 | -2,53 | -5,78  | 0,00001 | ---             | PGBD5        |  |
| 7924977 | -1,26 | -2,40 | 0,00183 | -1,16 | -2,24  | 0,00153 | NM_024554       | ACD          |  |
| 8002057 | -1,26 | -2,40 | 0,04341 | 0,27  | 1,21   | 0,48977 | NM_001082486    | ---          |  |
| 7950269 | -1,26 | -2,40 | 0,05928 | -0,69 | -1,61  | 0,35207 | ---             | SLC13A5      |  |
| 8011975 | -1,26 | -2,40 | 0,04725 | -1,19 | -2,28  | 0,01232 | NM_177550       | RTN2         |  |
| 8037594 | -1,26 | -2,40 | 0,01797 | -0,37 | -1,29  | 0,08775 | NM_005619       | C11orf21     |  |
| 7945734 | -1,26 | -2,40 | 0,01920 | -1,91 | -3,76  | 0,01945 | AB029488        | SLC9A3       |  |
| 8110688 | -1,26 | -2,40 | 0,00907 | -0,56 | -1,47  | 0,17696 | NM_004174       | FAM109B      |  |
| 8073573 | -1,26 | -2,40 | 0,07247 | 0,77  | 1,70   | 0,03126 | NM_001002034    | OR7E87P      |  |
| 7942277 | -1,26 | -2,40 | 0,21633 | -2,11 | -4,31  | 0,00096 | ENST00000454336 | DKFZP547L112 |  |
| 7981775 | -1,26 | -2,40 | 0,00848 | -1,77 | -3,41  | 0,00501 | ENST00000435482 | ARSF         |  |
| 8165843 | -1,26 | -2,40 | 0,05953 | -0,82 | -1,76  | 0,00490 | NM_004042       | NCF4         |  |
| 8072744 | -1,26 | -2,40 | 0,10560 | -1,08 | -2,11  | 0,00011 | NM_013416       | ---          |  |
| 7925450 | -1,26 | -2,40 | 0,02378 | -0,67 | -1,59  | 0,00166 | ---             | RAPGEF3      |  |
| 7962623 | -1,26 | -2,40 | 0,06588 | -1,60 | -3,04  | 0,00128 | NM_001098531    | ---          |  |
| 8124162 | -1,26 | -2,40 | 0,00151 | -1,87 | -3,66  | 0,00001 | ---             | SPAG6        |  |
| 7926622 | -1,26 | -2,40 | 0,00010 | -1,05 | -2,07  | 0,00318 | NM_012443       | ---          |  |
| 8095301 | -1,26 | -2,40 | 0,00296 | -1,04 | -2,06  | 0,01935 | ---             | ---          |  |
| 8043572 | -1,26 | -2,40 | 0,05240 | -3,32 | -10,02 | 0,00002 | ---             | SDCBP2       |  |
| 8064418 | -1,26 | -2,40 | 0,17370 | -1,57 | -2,97  | 0,02335 | NM_080489       | C11orf53     |  |
| 7943729 | -1,26 | -2,40 | 0,14832 | -1,48 | -2,78  | 0,08515 | BC039669        | SNORD59A     |  |
| 7964248 | -1,26 | -2,40 | 0,02188 | -0,63 | -1,55  | 0,02136 | NR_002737       | CYP4F2       |  |
| 8035083 | -1,26 | -2,40 | 0,04785 | -1,26 | -2,40  | 0,00266 | NM_001082       | ---          |  |
| 8150976 | -1,26 | -2,40 | 0,01106 | -1,36 | -2,57  | 0,01122 | ---             | MDFI         |  |
| 8119466 | -1,26 | -2,40 | 0,05947 | -0,27 | -1,21  | 0,44447 | NM_005586       | ITGB4        |  |
| 8009951 | -1,26 | -2,40 | 0,00774 | 2,59  | 6,01   | 0,00527 | NM_000213       | FBXO9        |  |
| 8127128 | -1,26 | -2,40 | 0,22441 | -1,04 | -2,05  | 0,09819 | NM_033480       | SRRM3        |  |
| 8133704 | -1,26 | -2,40 | 0,04444 | -0,94 | -1,93  | 0,01185 | NM_001110199    | TUBB8        |  |
| 7911355 | -1,26 | -2,40 | 0,11820 | -2,19 | -4,55  | 0,00283 | NM_177987       | LENEP        |  |
| 7905848 | -1,26 | -2,40 | 0,04648 | -1,29 | -2,44  | 0,10758 | NM_018655       | ---          |  |
| 8154719 | -1,26 | -2,40 | 0,00527 | -1,19 | -2,28  | 0,02001 | ---             | ---          |  |
| 8112310 | -1,26 | -2,40 | 0,15476 | -0,52 | -1,44  | 0,00773 | ---             | NRG4         |  |
| 7990555 | -1,26 | -2,40 | 0,01711 | 3,37  | 10,36  | 0,00010 | NM_138573       | ---          |  |
| 8104996 | -1,26 | -2,40 | 0,00236 | -0,96 | -1,94  | 0,01773 | ---             | TREH         |  |
| 7952086 | -1,26 | -2,40 | 0,00306 | -0,60 | -1,52  | 0,02655 | NM_007180       | TNFRSF14     |  |
| 7911754 | -1,26 | -2,40 | 0,04290 | -1,56 | -2,94  | 0,00725 | NM_003820       | ---          |  |
| 8060837 | -1,26 | -2,40 | 0,04488 | -1,51 | -2,85  | 0,00355 | ---             | IFNK         |  |
| 8154721 | -1,26 | -2,40 | 0,02989 | -0,78 | -1,72  | 0,04376 | NM_020124       | ZZEF1        |  |
| 8003846 | -1,26 | -2,40 | 0,02273 | -0,57 | -1,48  | 0,11891 | NM_015113       | CHST13       |  |
| 8082289 | -1,27 | -2,40 | 0,01139 | -1,16 | -2,23  | 0,00795 | NM_152889       | MT3          |  |
| 7995776 | -1,27 | -2,40 | 0,08688 | -1,23 | -2,35  | 0,03823 | NM_005954       | CDK5R1       |  |
| 8006409 | -1,27 | -2,40 | 0,01876 | -0,57 | -1,48  | 0,37195 | NM_003885       | KIAA0649     |  |
| 8159243 | -1,27 | -2,40 | 0,06805 | -1,22 | -2,33  | 0,05096 | NM_014811       | ---          |  |
| 8139798 | -1,27 | -2,40 | 0,01172 | -1,41 | -2,65  | 0,00144 | ---             | LOC732275    |  |
| 8003230 | -1,27 | -2,40 | 0,12336 | -1,79 | -3,45  | 0,03474 | NR_024406       | MIR423       |  |
| 8006119 | -1,27 | -2,40 | 0,09795 | -0,94 | -3,83  | 0,04594 | NR_029945       | MYCNOS       |  |
| 8050423 | -1,27 | -2,40 | 0,11936 | -1,20 | -2,30  | 0,03179 | NR_026766       | PSRC1        |  |
| 7918300 | -1,27 | -2,41 | 0,00967 | -0,07 | -1,05  | 0,86773 | NM_032636       | CDH17        |  |
| 8151795 | -1,27 | -2,41 | 0,00831 | -1,02 | -2,03  | 0,00206 | NM_004063       | HTR1B        |  |
| 8127692 | -1,27 | -2,41 | 0,07964 | -0,96 | -1,94  | 0,00295 | NM_000863       | PRR20A       |  |
| 7969300 | -1,27 | -2,41 | 0,30445 | -4,31 | -19,87 | 0,00000 | NM_198441       | PRR20A       |  |
| 7969306 | -1,27 | -2,41 | 0,30445 | -4,31 | -19,87 | 0,00000 | NM_198441       | PRR20A       |  |
| 7969312 | -1,27 | -2,41 | 0,30445 | -4,31 | -19,87 | 0,00000 | NM_198441       | PRR20A       |  |
| 7969318 | -1,27 | -2,41 | 0,30445 | -4,31 | -19,87 | 0,00000 | NM_198441       | PRR20A       |  |
| 7969324 | -1,27 | -2,41 | 0,30445 | -4,31 | -19,87 | 0,00000 | NM_198441       | PRR20A       |  |
| 7907549 | -1,27 | -2,41 | 0,00926 | -0,62 | -1,53  | 0,05879 | NM_022093       | TNN          |  |
| 8054794 | -1,27 | -2,41 | 0,03488 | -2,14 | -4,42  | 0,01319 | ---             | FLJ20464     |  |
| 8072486 | -1,27 | -2,41 | 0,03204 | -0,59 | -1,51  | 0,17900 | CR456348        | C7orf50      |  |
| 8137700 | -1,27 | -2,41 | 0,07603 | -1,34 | -2,53  | 0,09074 | NM_032350       | LOC100129476 |  |
| 7912133 | -1,27 | -2,41 | 0,12266 | -1,53 | -2,90  | 0,00187 | ENST00000439923 | ---          |  |
| 8092081 | -1,27 | -2,41 | 0,01458 | -0,74 | -1,67  | 0,03972 | ---             | ---          |  |
| 7900181 | -1,27 | -2,41 | 0,00827 | -2,00 | -3,99  | 0,00003 | ---             | ---          |  |
| 8072573 | -1,27 | -2,41 | 0,05397 | -1,48 | -2,79  | 0,01547 | ---             | ---          |  |
| 8005265 | -1,27 | -2,41 | 0,05577 | -1,53 | -2,89  | 0,00171 | ---             | ---          |  |
| 7972173 | -1,27 | -2,41 | 0,00968 | -1,37 | -2,59  | 0,00577 | ---             | DNAJC5B      |  |
| 8146660 | -1,27 | -2,41 | 0,02284 | -1,81 | -3,51  | 0,00016 | NM_033105       | ---          |  |
| 7996288 | -1,27 | -2,41 | 0,00031 | -1,17 | -2,25  | 0,00175 | ---             | DPF1         |  |
| 8036460 | -1,27 | -2,41 | 0,00080 | 0,41  | 1,33   | 0,26513 | NM_004647       | ERBB3        |  |
| 7956120 | -1,27 | -2,41 | 0,00201 | 2,17  | 4,51   | 0,00483 | NM_001982       | ---          |  |
| 8097015 | -1,27 | -2,41 | 0,02883 | -1,24 | -2,37  | 0,02890 | ---             | OR2B3        |  |
| 8124632 | -1,27 | -2,41 | 0,00548 | -1,89 | -3,72  | 0,00373 | NM_001005226    | OR2B3        |  |
| 8178285 | -1,27 | -2,41 | 0,00548 | -1,89 | -3,72  | 0,00373 | NM_001005226    | OR2B3        |  |
| 8179589 | -1,27 | -2,41 | 0,00548 | -1,89 | -3,72  | 0,00373 | NM_001005226    | ---          |  |



|         |       |       |         |       |        |         |                 |              |  |
|---------|-------|-------|---------|-------|--------|---------|-----------------|--------------|--|
| 7936461 | -1,27 | -2,41 | 0,01102 | -0,92 | -1,89  | 0,00203 | ---             | SLC6A20      |  |
| 8086540 | -1,27 | -2,41 | 0,09240 | -0,66 | -1,58  | 0,10040 | NM_020208       | LYPD6B       |  |
| 8045664 | -1,27 | -2,41 | 0,04346 | 0,14  | 1,10   | 0,76312 | NM_177964       | LOC645212    |  |
| 7988283 | -1,27 | -2,41 | 0,00382 | 0,00  | 1,00   | 0,99015 | ENST00000313807 | ---          |  |
| 8117241 | -1,27 | -2,41 | 0,05970 | -0,40 | -1,32  | 0,14772 | ---             | ---          |  |
| 8127507 | -1,27 | -2,41 | 0,14625 | -0,93 | -1,90  | 0,00584 | ---             | ---          |  |
| 8013089 | -1,27 | -2,41 | 0,08475 | -0,61 | -1,53  | 0,12465 | ---             | FCGR3A       |  |
| 7921868 | -1,27 | -2,41 | 0,00748 | -1,07 | -2,10  | 0,14155 | NM_000569       | CXorf27      |  |
| 8166745 | -1,27 | -2,41 | 0,03369 | -1,03 | -2,05  | 0,02017 | NM_012274       | ESPNP        |  |
| 7912854 | -1,27 | -2,41 | 0,04162 | -2,23 | -4,71  | 0,08037 | NR_026567       | PRR15        |  |
| 8132031 | -1,27 | -2,41 | 0,03187 | -0,97 | -1,95  | 0,17586 | NM_175887       | ADAMTS10     |  |
| 8033635 | -1,27 | -2,41 | 0,00060 | 0,37  | 1,29   | 0,50370 | NM_030957       | TCP10        |  |
| 8130787 | -1,27 | -2,41 | 0,02529 | -1,21 | -2,31  | 0,00004 | NM_004610       | C15orf62     |  |
| 7982810 | -1,27 | -2,41 | 0,07270 | -0,04 | -1,03  | 0,93156 | NM_001130448    | ---          |  |
| 7980401 | -1,27 | -2,41 | 0,10826 | -0,48 | -1,40  | 0,11442 | ---             | ZNF768       |  |
| 8000899 | -1,27 | -2,41 | 0,02033 | 0,56  | 1,47   | 0,35233 | NM_024671       | HUNK         |  |
| 8068180 | -1,27 | -2,41 | 0,01612 | -0,61 | -1,53  | 0,03154 | NM_014586       | OLIG2        |  |
| 8068231 | -1,27 | -2,41 | 0,00279 | -1,06 | -2,08  | 0,00237 | NM_005806       | SLC22A9      |  |
| 7940749 | -1,27 | -2,41 | 0,08273 | -1,06 | -2,09  | 0,00713 | NM_080866       | CCDC85C      |  |
| 7981266 | -1,27 | -2,41 | 0,10799 | -0,25 | -1,19  | 0,63615 | NM_001144995    | ANKRD18A     |  |
| 8161270 | -1,27 | -2,41 | 0,00225 | 1,29  | 2,44   | 0,02218 | NM_147195       | ---          |  |
| 7904164 | -1,27 | -2,41 | 0,01809 | -1,25 | -2,39  | 0,00467 | ---             | NRIP2        |  |
| 7960331 | -1,27 | -2,41 | 0,09526 | -1,22 | -2,32  | 0,13726 | NM_031474       | SPACA4       |  |
| 8030076 | -1,27 | -2,41 | 0,03221 | -0,65 | -1,57  | 0,03855 | NM_133498       | PF4V1        |  |
| 7915345 | -1,27 | -2,41 | 0,01866 | -0,93 | -1,91  | 0,20658 | NM_001142588    | C8orf30A     |  |
| 8148799 | -1,27 | -2,41 | 0,01973 | -0,07 | -1,05  | 0,88956 | NM_016458       | ---          |  |
| 8048368 | -1,27 | -2,41 | 0,04795 | -1,09 | -2,13  | 0,00117 | ---             | PF4V1        |  |
| 8095694 | -1,27 | -2,41 | 0,06121 | -1,28 | -2,43  | 0,03910 | NM_002620       | ---          |  |
| 8166945 | -1,27 | -2,41 | 0,14192 | -2,25 | -4,75  | 0,00083 | ---             | LOC100129726 |  |
| 8041640 | -1,27 | -2,41 | 0,04240 | -0,76 | -1,69  | 0,08432 | NR_027251       | HRASLS5      |  |
| 7948973 | -1,27 | -2,42 | 0,00992 | -2,22 | -4,66  | 0,00032 | NM_054108       | ODF3         |  |
| 7937263 | -1,27 | -2,42 | 0,01119 | -1,21 | -2,32  | 0,00075 | NM_053280       | ---          |  |
| 7986501 | -1,27 | -2,42 | 0,01918 | -1,95 | -3,86  | 0,03580 | ---             | KLHDC8A      |  |
| 7923762 | -1,27 | -2,42 | 0,00301 | -1,13 | -2,19  | 0,00879 | NM_018203       | C1QTNF4      |  |
| 7947928 | -1,27 | -2,42 | 0,01535 | -1,70 | -3,25  | 0,00696 | NM_031909       | FGFBP3       |  |
| 7935006 | -1,27 | -2,42 | 0,04838 | -1,95 | -3,86  | 0,00305 | NM_152429       | LRFN2        |  |
| 8126244 | -1,27 | -2,42 | 0,01950 | -0,64 | -1,56  | 0,27126 | NM_020737       | ZAR1         |  |
| 8094968 | -1,27 | -2,42 | 0,02247 | -1,09 | -2,12  | 0,04475 | NM_175619       | TNP2         |  |
| 7999427 | -1,27 | -2,42 | 0,10111 | -1,29 | -2,45  | 0,00808 | NM_005425       | SULT1B1      |  |
| 8100798 | -1,27 | -2,42 | 0,03311 | -0,96 | -1,95  | 0,02271 | NM_014465       | C2orf86      |  |
| 8052620 | -1,27 | -2,42 | 0,03203 | -0,63 | -1,55  | 0,00340 | ENST00000448143 | ---          |  |
| 8158404 | -1,27 | -2,42 | 0,01663 | -1,64 | -3,11  | 0,00077 | ---             | DEFB118      |  |
| 8061509 | -1,27 | -2,42 | 0,08171 | -2,09 | -4,26  | 0,01172 | NM_054112       | ---          |  |
| 8090637 | -1,27 | -2,42 | 0,30807 | -3,44 | -10,84 | 0,00240 | ---             | CTLA4        |  |
| 8047692 | -1,27 | -2,42 | 0,00711 | -1,27 | -2,40  | 0,02051 | NM_005214       | ---          |  |
| 8013507 | -1,27 | -2,42 | 0,18301 | -1,15 | -2,23  | 0,09523 | ---             | IGF2AS       |  |
| 7937774 | -1,27 | -2,42 | 0,03781 | -2,18 | -4,54  | 0,00329 | NR_028044       | ZNF764       |  |
| 8000906 | -1,27 | -2,42 | 0,22131 | -1,20 | -2,29  | 0,23025 | NM_033410       | TMEM102      |  |
| 8004404 | -1,27 | -2,42 | 0,11109 | -1,22 | -2,34  | 0,00776 | NM_178518       | SULT2A1      |  |
| 8037949 | -1,27 | -2,42 | 0,00715 | -1,24 | -2,37  | 0,05013 | NM_003167       | LOC113230    |  |
| 8026294 | -1,27 | -2,42 | 0,02518 | 0,00  | 1,00   | 0,99471 | NR_024282       | CFP          |  |
| 8172333 | -1,27 | -2,42 | 0,13045 | -1,91 | -3,77  | 0,01339 | NM_002621       | ---          |  |
| 7925587 | -1,28 | -2,42 | 0,03144 | -1,89 | -3,70  | 0,09594 | ---             | SLC17A7      |  |
| 8038367 | -1,28 | -2,42 | 0,06631 | -0,65 | -1,57  | 0,25107 | NM_020309       | ---          |  |
| 7917514 | -1,28 | -2,42 | 0,00048 | -1,55 | -2,94  | 0,00244 | ---             | PCDH8        |  |
| 7971850 | -1,28 | -2,42 | 0,02845 | -1,86 | -3,62  | 0,00032 | NM_002590       | PTCH2        |  |
| 7915614 | -1,28 | -2,42 | 0,06724 | -0,80 | -1,75  | 0,02576 | NM_003738       | ZG16         |  |
| 8003578 | -1,28 | -2,42 | 0,01839 | -1,31 | -2,49  | 0,00076 | NM_152338       | OR2T12       |  |
| 7925743 | -1,28 | -2,42 | 0,21676 | -3,01 | -8,06  | 0,00021 | NM_001004692    | RAB11FIP4    |  |
| 8006298 | -1,28 | -2,42 | 0,00207 | 0,31  | 1,24   | 0,40944 | NM_032932       | ---          |  |
| 7915198 | -1,28 | -2,42 | 0,01341 | -1,53 | -2,88  | 0,00825 | ---             | NKD1         |  |
| 7995525 | -1,28 | -2,42 | 0,00635 | 0,13  | 1,09   | 0,70768 | NM_033119       | CTAG1A       |  |
| 8170965 | -1,28 | -2,42 | 0,05299 | -0,77 | -1,71  | 0,02058 | NM_139250       | CTAG1A       |  |
| 8176149 | -1,28 | -2,42 | 0,05299 | -0,77 | -1,71  | 0,02058 | NM_139250       | ---          |  |
| 7927643 | -1,28 | -2,42 | 0,10831 | -1,53 | -2,88  | 0,00314 | ---             | OR4D5        |  |
| 7944795 | -1,28 | -2,42 | 0,00668 | -1,05 | -2,06  | 0,00276 | NM_001001965    | HSCB         |  |
| 8072143 | -1,28 | -2,42 | 0,01181 | -0,30 | -1,23  | 0,46083 | NM_172002       | COMTD1       |  |
| 7934544 | -1,28 | -2,42 | 0,01942 | -1,12 | -2,18  | 0,03893 | NM_144589       | KRT74        |  |
| 7963448 | -1,28 | -2,42 | 0,00614 | -1,21 | -2,32  | 0,03654 | NM_175053       | XRCC3        |  |
| 7981447 | -1,28 | -2,42 | 0,00015 | -0,57 | -1,48  | 0,10410 | NM_001100119    | GP1BB        |  |
| 8071268 | -1,28 | -2,42 | 0,00314 | -0,72 | -1,64  | 0,13417 | NM_000407       | ---          |  |
| 7955448 | -1,28 | -2,42 | 0,03507 | -1,03 | -2,04  | 0,12103 | ---             | GPR111       |  |
| 8120124 | -1,28 | -2,42 | 0,01330 | -1,54 | -2,90  | 0,00069 | NM_153839       | FAM90A20     |  |

|         |       |       |         |       |       |         |              |           |
|---------|-------|-------|---------|-------|-------|---------|--------------|-----------|
| 8144388 | -1,28 | -2,42 | 0,30080 | -2,54 | -5,81 | 0,00173 | NM_001164453 | PLUNC     |
| 8061883 | -1,28 | -2,42 | 0,01763 | -1,16 | -2,24 | 0,08032 | NM_130852    | NBPF4     |
| 7918203 | -1,28 | -2,42 | 0,01489 | -1,63 | -3,10 | 0,00025 | NM_001143989 | URAC1     |
| 8090366 | -1,28 | -2,42 | 0,05879 | -0,68 | -1,61 | 0,13389 | NM_144639    | PRAC      |
| 8016484 | -1,28 | -2,43 | 0,01351 | -1,35 | -2,56 | 0,00065 | NM_032391    | ---       |
| 8072482 | -1,28 | -2,43 | 0,01581 | -1,04 | -2,06 | 0,05279 | ---          | ---       |
| 8080894 | -1,28 | -2,43 | 0,00348 | -1,76 | -3,38 | 0,00003 | ---          | ---       |
| 8110668 | -1,28 | -2,43 | 0,03660 | -1,49 | -2,81 | 0,03894 | ---          | LRRCS56   |
| 7937391 | -1,28 | -2,43 | 0,05366 | -1,11 | -2,16 | 0,00641 | NM_198075    | C1orf89   |
| 7912743 | -1,28 | -2,43 | 0,01772 | -1,03 | -2,04 | 0,09098 | NM_030907    | GAPT      |
| 8105481 | -1,28 | -2,43 | 0,00839 | -1,66 | -3,16 | 0,00163 | NM_152687    | PABPC1L2B |
| 8168393 | -1,28 | -2,43 | 0,04020 | -1,01 | -2,02 | 0,01170 | NM_001042506 | ---       |
| 8055641 | -1,28 | -2,43 | 0,02584 | -0,76 | -1,69 | 0,01246 | ---          | NEK8      |
| 8005959 | -1,28 | -2,43 | 0,02266 | -0,46 | -1,37 | 0,07453 | NM_178170    | AJAP1     |
| 7897227 | -1,28 | -2,43 | 0,00528 | -0,76 | -1,69 | 0,13682 | NM_018836    | KCNQ2     |
| 8067626 | -1,28 | -2,43 | 0,00076 | -1,21 | -2,31 | 0,00252 | NM_172107    | CTRB2     |
| 8002845 | -1,28 | -2,43 | 0,07027 | -1,98 | -3,94 | 0,00076 | NM_001025200 | C12orf61  |
| 7964642 | -1,28 | -2,43 | 0,01448 | -1,63 | -3,09 | 0,00672 | NM_175895    | MIR188    |
| 8167623 | -1,28 | -2,43 | 0,01582 | -1,77 | -3,41 | 0,00235 | NR_029708    | C20orf195 |
| 8064108 | -1,28 | -2,43 | 0,03018 | -1,46 | -2,76 | 0,04328 | BC000912     | CHST6     |
| 8002882 | -1,28 | -2,43 | 0,03077 | 1,34  | 2,52  | 0,03215 | NM_021615    | ---       |
| 8062685 | -1,28 | -2,43 | 0,00150 | -1,23 | -2,35 | 0,00502 | ---          | MYBPC2    |
| 8030677 | -1,28 | -2,43 | 0,00655 | -0,93 | -1,90 | 0,03457 | NM_004533    | BASE      |
| 8061859 | -1,28 | -2,43 | 0,03252 | -1,21 | -2,32 | 0,01495 | NR_026760    | MIR191    |
| 8087252 | -1,28 | -2,43 | 0,01474 | -1,22 | -2,32 | 0,08235 | NR_029690    | ---       |
| 7987634 | -1,28 | -2,43 | 0,15022 | -1,03 | -2,04 | 0,00648 | ---          | ---       |
| 8056045 | -1,28 | -2,43 | 0,03639 | -0,81 | -1,75 | 0,14188 | ---          | ---       |
| 7954995 | -1,28 | -2,43 | 0,05839 | -1,09 | -2,13 | 0,02238 | ---          | ---       |
| 7965767 | -1,28 | -2,43 | 0,04451 | -0,73 | -1,66 | 0,08429 | ---          | PM20D1    |
| 7923837 | -1,28 | -2,43 | 0,03245 | -1,76 | -3,38 | 0,00389 | NM_152491    | DEFB130   |
| 8149353 | -1,28 | -2,43 | 0,11108 | -1,30 | -2,47 | 0,04009 | NM_001037804 | DEFB130   |
| 8149377 | -1,28 | -2,43 | 0,11108 | -1,30 | -2,47 | 0,04009 | NM_001037804 | ZBTB16    |
| 7943984 | -1,28 | -2,43 | 0,01691 | -1,57 | -2,97 | 0,02602 | NM_006006    | SFN       |
| 7899265 | -1,28 | -2,43 | 0,08646 | 1,12  | 2,17  | 0,03005 | NM_006142    | C6orf54   |
| 8130827 | -1,28 | -2,43 | 0,05201 | -2,03 | -4,07 | 0,01281 | AB016899     | DQX1      |
| 8053200 | -1,28 | -2,43 | 0,05501 | -0,63 | -1,55 | 0,46421 | NM_133637    | ZRSR1     |
| 8107353 | -1,28 | -2,43 | 0,27618 | -0,92 | -1,89 | 0,12061 | BC104811     | ELP2P     |
| 8003619 | -1,28 | -2,43 | 0,11172 | -0,71 | -1,63 | 0,03081 | NR_024120    | HIF3A     |
| 8029784 | -1,28 | -2,43 | 0,02077 | -1,39 | -2,63 | 0,01987 | NM_152794    | ---       |
| 8083994 | -1,28 | -2,43 | 0,02787 | -0,77 | -1,71 | 0,01810 | ---          | ERF       |
| 8037166 | -1,28 | -2,43 | 0,00579 | -0,57 | -1,48 | 0,02011 | NM_006494    | HLX       |
| 7909890 | -1,28 | -2,43 | 0,00254 | -1,13 | -2,19 | 0,07990 | NM_021958    | ---       |
| 7948159 | -1,28 | -2,43 | 0,07482 | -1,30 | -2,46 | 0,00107 | ---          | NPPA      |
| 7912515 | -1,28 | -2,43 | 0,14651 | -2,10 | -4,29 | 0,00186 | NM_006172    | HILS1     |
| 8016640 | -1,28 | -2,43 | 0,01463 | -1,89 | -3,71 | 0,00717 | NR_024193    | ---       |
| 8021342 | -1,28 | -2,43 | 0,07579 | -0,66 | -1,58 | 0,07209 | ---          | ---       |
| 7977653 | -1,28 | -2,43 | 0,00044 | -1,22 | -2,33 | 0,00000 | ---          | ---       |
| 8042219 | -1,28 | -2,44 | 0,00113 | -1,27 | -2,41 | 0,03002 | ---          | EFHD1     |
| 8049187 | -1,28 | -2,44 | 0,14291 | 0,22  | 1,17  | 0,76989 | NM_025202    | SIGLEC16  |
| 8030563 | -1,28 | -2,44 | 0,11324 | -2,23 | -4,69 | 0,07756 | NR_002825    | SDF2L1    |
| 8071559 | -1,28 | -2,44 | 0,04739 | 1,56  | 2,95  | 0,05597 | NM_022044    | ---       |
| 8134372 | -1,28 | -2,44 | 0,00382 | -0,74 | -1,67 | 0,00063 | ---          | ---       |
| 8119336 | -1,28 | -2,44 | 0,02541 | -1,55 | -2,92 | 0,00732 | ---          | TRIM60    |
| 8098170 | -1,28 | -2,44 | 0,02384 | -0,93 | -1,91 | 0,02389 | NM_152620    | MIR26A1   |
| 8078663 | -1,28 | -2,44 | 0,03423 | -0,94 | -1,92 | 0,00655 | NR_029499    | CST9      |
| 8065400 | -1,28 | -2,44 | 0,04814 | -1,55 | -2,93 | 0,00049 | NM_001008693 | FAM90A13  |
| 8149204 | -1,29 | -2,44 | 0,31689 | -2,37 | -5,16 | 0,00587 | NM_001164456 | ---       |
| 8149065 | -1,29 | -2,44 | 0,01371 | -1,12 | -2,18 | 0,10152 | ---          | C18orf16  |
| 8020717 | -1,29 | -2,44 | 0,18666 | -1,95 | -3,87 | 0,08245 | AK055069     | HRC       |
| 8038319 | -1,29 | -2,44 | 0,01045 | -1,68 | -3,20 | 0,01752 | NM_002152    | TTY14     |
| 8177217 | -1,29 | -2,44 | 0,02661 | -1,34 | -2,53 | 0,00396 | NR_001543    | ---       |
| 7909888 | -1,29 | -2,44 | 0,05423 | -1,00 | -2,00 | 0,03394 | ---          | CALY      |
| 7937200 | -1,29 | -2,44 | 0,00624 | -2,10 | -4,28 | 0,00251 | NM_015722    | FLJ45340  |
| 8031992 | -1,29 | -2,44 | 0,34377 | -2,77 | -6,80 | 0,00062 | NR_024368    | SPSB3     |
| 7998590 | -1,29 | -2,44 | 0,03808 | -1,76 | -3,40 | 0,00156 | NM_080861    | C16orf42  |
| 7998449 | -1,29 | -2,44 | 0,01016 | 0,31  | 1,24  | 0,33251 | NM_001001410 | ---       |
| 7997372 | -1,29 | -2,44 | 0,08166 | -1,37 | -2,58 | 0,00213 | ---          | RNF126P1  |
| 8008662 | -1,29 | -2,44 | 0,09414 | -1,47 | -2,77 | 0,00511 | NR_002818    | SLC19A1   |
| 8070912 | -1,29 | -2,44 | 0,00120 | 0,80  | 1,74  | 0,13655 | NM_194255    | GABRB2    |
| 8115651 | -1,29 | -2,44 | 0,00142 | -1,61 | -3,06 | 0,00304 | NM_021911    | TRIM54    |
| 8040898 | -1,29 | -2,44 | 0,01115 | 0,16  | 1,11  | 0,39741 | NM_032546    | C19orf33  |
| 8028325 | -1,29 | -2,44 | 0,05704 | 1,62  | 3,07  | 0,01064 | NM_033520    | ---       |
| 8137081 | -1,29 | -2,44 | 0,02068 | -1,74 | -3,34 | 0,00086 | ---          | ---       |

|         |       |       |         |       |       |         |              |              |
|---------|-------|-------|---------|-------|-------|---------|--------------|--------------|
| 8065370 | -1,29 | -2,44 | 0,02197 | -0,88 | -1,84 | 0,13387 | ---          | ---          |
| 7965675 | -1,29 | -2,44 | 0,03063 | -1,25 | -2,38 | 0,05630 | ---          | DENND2C      |
| 7918753 | -1,29 | -2,44 | 0,00004 | -0,41 | -1,33 | 0,00173 | BC063894     | ---          |
| 7966686 | -1,29 | -2,44 | 0,01649 | -2,10 | -4,28 | 0,00415 | ---          | UNC93B1      |
| 8094144 | -1,29 | -2,44 | 0,13084 | -0,42 | -1,34 | 0,61124 | NM_030930    | ---          |
| 8078960 | -1,29 | -2,44 | 0,02316 | -1,12 | -2,17 | 0,00972 | ---          | RNF222       |
| 8012473 | -1,29 | -2,44 | 0,14159 | -1,73 | -3,32 | 0,02669 | NM_001146684 | COASY        |
| 8007272 | -1,29 | -2,44 | 0,05526 | 0,82  | 1,77  | 0,12508 | NM_025233    | ---          |
| 7973972 | -1,29 | -2,44 | 0,00491 | 0,33  | 1,26  | 0,63529 | ---          | PRAMEF18     |
| 7912601 | -1,29 | -2,44 | 0,04793 | -1,11 | -2,16 | 0,00045 | NM_001099850 | PRAMEF18     |
| 7912617 | -1,29 | -2,44 | 0,04793 | -1,11 | -2,16 | 0,00045 | NM_001099850 | LRDD         |
| 7945550 | -1,29 | -2,44 | 0,14739 | -0,89 | -1,85 | 0,12265 | NM_018494    | KCNA7        |
| 8038309 | -1,29 | -2,44 | 0,03417 | -1,17 | -2,26 | 0,05057 | NM_031886    | ---          |
| 7991425 | -1,29 | -2,44 | 0,02510 | -2,17 | -4,49 | 0,00015 | ---          | MAP7D1       |
| 7900095 | -1,29 | -2,44 | 0,04838 | -0,70 | -1,63 | 0,15075 | NM_018067    | ---          |
| 7983254 | -1,29 | -2,44 | 0,00024 | -1,04 | -2,05 | 0,05255 | ---          | ---          |
| 7983272 | -1,29 | -2,44 | 0,00024 | -1,04 | -2,05 | 0,05255 | ---          | PMCHL2       |
| 8177554 | -1,29 | -2,44 | 0,00106 | -1,65 | -3,15 | 0,06554 | NR_003922    | ---          |
| 8047503 | -1,29 | -2,44 | 0,07953 | -2,29 | -4,87 | 0,00754 | ---          | TSPY1        |
| 8176544 | -1,29 | -2,44 | 0,05860 | -1,28 | -2,43 | 0,00032 | NM_003308    | ---          |
| 8065323 | -1,29 | -2,44 | 0,01032 | -0,77 | -1,71 | 0,04447 | ---          | ---          |
| 8046755 | -1,29 | -2,44 | 0,14494 | -2,24 | -4,74 | 0,00326 | ---          | OR5212       |
| 7937946 | -1,29 | -2,45 | 0,01426 | -0,92 | -1,89 | 0,07606 | NM_001005170 | LOC100132169 |
| 7991731 | -1,29 | -2,45 | 0,03616 | 0,27  | 1,21  | 0,61888 | BC032901     | ---          |
| 7984660 | -1,29 | -2,45 | 0,12121 | -2,56 | -5,89 | 0,00741 | ---          | GRK6         |
| 8110362 | -1,29 | -2,45 | 0,03766 | -0,05 | -1,03 | 0,93935 | NM_001004106 | ---          |
| 8176933 | -1,29 | -2,45 | 0,01782 | -0,38 | -1,30 | 0,25058 | ---          | ---          |
| 8177401 | -1,29 | -2,45 | 0,01782 | -0,38 | -1,30 | 0,25058 | ---          | BCR          |
| 8071516 | -1,29 | -2,45 | 0,05285 | -1,42 | -2,68 | 0,01359 | NM_004327    | DRD1         |
| 8115875 | -1,29 | -2,45 | 0,01504 | -1,08 | -2,12 | 0,00129 | NM_000794    | SNRNP70      |
| 8030199 | -1,29 | -2,45 | 0,05948 | -0,82 | -1,77 | 0,13277 | NM_003089    | SLC27A1      |
| 8026763 | -1,29 | -2,45 | 0,00874 | -1,18 | -2,26 | 0,00776 | NM_198580    | CSF2RA       |
| 8165735 | -1,29 | -2,45 | 0,01289 | 0,11  | 1,08  | 0,47740 | NM_001161531 | CSF2RA       |
| 8176306 | -1,29 | -2,45 | 0,01289 | 0,11  | 1,08  | 0,47740 | NM_001161531 | ---          |
| 8143788 | -1,29 | -2,45 | 0,04053 | -1,12 | -2,17 | 0,12137 | ---          | DEFB125      |
| 8060303 | -1,29 | -2,45 | 0,01672 | -0,97 | -1,96 | 0,06332 | NM_153325    | MB           |
| 8075659 | -1,29 | -2,45 | 0,01484 | -0,24 | -1,18 | 0,62469 | NM_203377    | LCE3C        |
| 7905490 | -1,29 | -2,45 | 0,00240 | -0,72 | -1,64 | 0,03527 | NM_178434    | ---          |
| 7989311 | -1,29 | -2,45 | 0,03203 | -1,55 | -2,92 | 0,01888 | ---          | ---          |
| 8029726 | -1,29 | -2,45 | 0,04360 | -1,22 | -2,33 | 0,00547 | ---          | TWIST1       |
| 8138442 | -1,29 | -2,45 | 0,02790 | -1,93 | -3,81 | 0,00713 | NM_000474    | ADD2         |
| 8052882 | -1,29 | -2,45 | 0,01896 | 3,28  | 9,73  | 0,00031 | NM_017488    | LPPR1        |
| 8156923 | -1,29 | -2,45 | 0,07893 | -1,30 | -2,45 | 0,00002 | NM_207299    | RUNDC2A      |
| 7993274 | -1,29 | -2,45 | 0,00720 | -0,19 | -1,14 | 0,31623 | NM_032167    | ADIPOQ       |
| 8084710 | -1,29 | -2,45 | 0,02159 | -2,31 | -4,97 | 0,00018 | NM_001177800 | MIR105-1     |
| 8175706 | -1,29 | -2,45 | 0,00088 | -0,85 | -1,81 | 0,02252 | NR_029521    | ---          |
| 7957534 | -1,29 | -2,45 | 0,11213 | -1,28 | -2,43 | 0,00083 | ---          | ZNF771       |
| 7994817 | -1,29 | -2,45 | 0,03692 | -1,10 | -2,15 | 0,08930 | NM_016643    | XKR6         |
| 8149307 | -1,29 | -2,45 | 0,02806 | -1,45 | -2,72 | 0,02244 | NM_173683    | C8orf56      |
| 8152252 | -1,29 | -2,45 | 0,08911 | -0,69 | -1,61 | 0,01993 | NR_027071    | LOC100131943 |
| 8005659 | -1,29 | -2,45 | 0,00331 | -0,99 | -1,99 | 0,01719 | AY358202     | SYT8         |
| 7937713 | -1,29 | -2,45 | 0,00335 | -1,24 | -2,36 | 0,00936 | NM_138567    | PUF60        |
| 8153536 | -1,29 | -2,45 | 0,02339 | 0,60  | 1,51  | 0,54801 | NM_001136033 | ---          |
| 8091097 | -1,29 | -2,45 | 0,00258 | -1,11 | -2,17 | 0,09074 | ---          | CACNG1       |
| 8009343 | -1,29 | -2,45 | 0,03201 | -1,59 | -3,02 | 0,01426 | NM_000727    | YSK4         |
| 8055361 | -1,29 | -2,45 | 0,02252 | -1,49 | -2,81 | 0,00286 | NM_025052    | SNORA80      |
| 8069985 | -1,29 | -2,45 | 0,08925 | -1,83 | -3,57 | 0,00229 | NR_002996    | PRKCZ        |
| 7897044 | -1,29 | -2,45 | 0,00620 | 1,79  | 3,46  | 0,00074 | NM_002744    | GATM         |
| 7988414 | -1,29 | -2,45 | 0,02193 | 4,62  | 24,52 | 0,00048 | NM_001482    | ---          |
| 8026383 | -1,29 | -2,45 | 0,01145 | -1,85 | -3,60 | 0,00301 | ---          | ---          |
| 7959891 | -1,30 | -2,45 | 0,24191 | -3,06 | -8,32 | 0,00105 | ---          | TFF2         |
| 8070574 | -1,30 | -2,45 | 0,03603 | -1,05 | -2,07 | 0,04851 | NM_005423    | CCL24        |
| 8140367 | -1,30 | -2,46 | 0,00280 | -0,75 | -1,68 | 0,02748 | NM_002991    | CXXC4        |
| 8102135 | -1,30 | -2,46 | 0,05461 | -1,66 | -3,15 | 0,04227 | NM_025212    | ---          |
| 7946027 | -1,30 | -2,46 | 0,07186 | -1,97 | -3,92 | 0,04776 | ---          | ---          |
| 7970031 | -1,30 | -2,46 | 0,07901 | -1,09 | -2,12 | 0,00165 | ---          | FAM128B      |
| 8045146 | -1,30 | -2,46 | 0,06963 | -0,27 | -1,21 | 0,24008 | AK024408     | ---          |
| 7992140 | -1,30 | -2,46 | 0,02217 | -1,57 | -2,96 | 0,04704 | ---          | ZNF552       |
| 8039687 | -1,30 | -2,46 | 0,07265 | -1,45 | -2,73 | 0,00141 | NM_024762    | C2orf48      |
| 8040231 | -1,30 | -2,46 | 0,00246 | -0,43 | -1,35 | 0,11067 | BC093999     | GFOD1        |
| 8123976 | -1,30 | -2,46 | 0,00758 | -0,89 | -1,86 | 0,09914 | NM_018988    | ---          |
| 8056361 | -1,30 | -2,46 | 0,03306 | -1,55 | -2,92 | 0,07189 | ---          | SOX3         |
| 8175528 | -1,30 | -2,46 | 0,06287 | -2,31 | -4,97 | 0,00216 | NM_005634    | ---          |

|         |       |       |         |       |       |         |                 |              |  |
|---------|-------|-------|---------|-------|-------|---------|-----------------|--------------|--|
| 7934070 | -1,30 | -2,46 | 0,00040 | -1,38 | -2,60 | 0,00399 | ---             | ---          |  |
| 8127752 | -1,30 | -2,46 | 0,15627 | -1,53 | -2,89 | 0,00155 | ---             | DSCR10       |  |
| 8068578 | -1,30 | -2,46 | 0,04697 | -1,03 | -2,04 | 0,00066 | NR_027695       | ProSAPiP1    |  |
| 8064591 | -1,30 | -2,46 | 0,01772 | -1,63 | -3,09 | 0,00591 | NM_014731       | GRIN2D       |  |
| 8030022 | -1,30 | -2,46 | 0,01650 | -0,89 | -1,85 | 0,12606 | NM_000836       | PPP1R1B      |  |
| 8006865 | -1,30 | -2,46 | 0,02243 | -1,79 | -3,46 | 0,00059 | NM_032192       | LOC100130581 |  |
| 8015802 | -1,30 | -2,46 | 0,04065 | -1,29 | -2,45 | 0,02197 | AK127427        | LOC645188    |  |
| 8170257 | -1,30 | -2,46 | 0,05910 | -1,34 | -2,53 | 0,00006 | BC042039        | MIR124-3     |  |
| 8064029 | -1,30 | -2,46 | 0,01048 | -1,90 | -3,72 | 0,00991 | NR_029670       | C9orf16      |  |
| 8158177 | -1,30 | -2,46 | 0,04808 | -1,80 | -3,48 | 0,00242 | NM_024112       | CELA1        |  |
| 7963304 | -1,30 | -2,46 | 0,04227 | -1,50 | -2,82 | 0,03188 | NM_001971       | ZNF852       |  |
| 8079187 | -1,30 | -2,46 | 0,01698 | -0,87 | -1,83 | 0,01991 | AK296954        | LINGO1       |  |
| 7990643 | -1,30 | -2,46 | 0,05459 | -1,34 | -2,54 | 0,00210 | NM_032808       | PBOV1        |  |
| 8129876 | -1,30 | -2,46 | 0,00046 | -1,20 | -2,30 | 0,05769 | NM_021635       | DKFZP434K028 |  |
| 7948599 | -1,30 | -2,46 | 0,01473 | -1,34 | -2,53 | 0,00137 | ENST00000244906 | C21orf49     |  |
| 8068220 | -1,30 | -2,46 | 0,08587 | -1,24 | -2,36 | 0,00810 | NR_024622       | OR11A1       |  |
| 8178291 | -1,30 | -2,46 | 0,01904 | -1,01 | -2,01 | 0,07108 | NM_013937       | OR11A1       |  |
| 8179591 | -1,30 | -2,46 | 0,01904 | -1,01 | -2,01 | 0,07108 | NM_013937       | C15orf63     |  |
| 7983298 | -1,30 | -2,46 | 0,01805 | -0,16 | -1,12 | 0,48480 | NM_016400       | CDHR4        |  |
| 8087481 | -1,30 | -2,46 | 0,00175 | -0,71 | -1,64 | 0,00385 | NM_001007540    | ---          |  |
| 7988603 | -1,30 | -2,46 | 0,02186 | -0,84 | -1,79 | 0,01079 | ---             | MATK         |  |
| 8032682 | -1,30 | -2,46 | 0,01256 | -0,96 | -1,95 | 0,00848 | NM_139355       | ARMC3        |  |
| 7926638 | -1,30 | -2,46 | 0,02838 | -0,34 | -1,27 | 0,08476 | NM_173081       | TNNT1        |  |
| 8039340 | -1,30 | -2,46 | 0,25346 | 0,42  | 1,33  | 0,09246 | NM_003283       | ZNF219       |  |
| 7977646 | -1,30 | -2,46 | 0,02088 | -0,55 | -1,47 | 0,37536 | NM_016423       | ---          |  |
| 8023906 | -1,30 | -2,46 | 0,08491 | -0,84 | -1,79 | 0,00065 | ---             | CEACAM20     |  |
| 8037482 | -1,30 | -2,46 | 0,00001 | -0,65 | -1,57 | 0,15194 | NM_001102597    | NPAS1        |  |
| 8029870 | -1,30 | -2,46 | 0,02069 | -1,42 | -2,67 | 0,00092 | NM_002517       | PAK7         |  |
| 8064952 | -1,30 | -2,46 | 0,04660 | -1,29 | -2,44 | 0,01114 | NM_020341       | RFPL2        |  |
| 8075564 | -1,30 | -2,46 | 0,13364 | -1,03 | -2,05 | 0,00906 | NM_001098527    | MED22        |  |
| 8164872 | -1,30 | -2,46 | 0,01754 | 0,75  | 1,68  | 0,32464 | NM_181491       | NT5M         |  |
| 8005247 | -1,30 | -2,46 | 0,02501 | -1,08 | -2,11 | 0,01827 | NM_020201       | C2orf53      |  |
| 8051024 | -1,30 | -2,47 | 0,01722 | -1,86 | -3,64 | 0,00054 | NM_178553       | ---          |  |
| 8148327 | -1,30 | -2,47 | 0,01640 | -1,59 | -3,01 | 0,00182 | ---             | APLN         |  |
| 8175016 | -1,30 | -2,47 | 0,09470 | -0,76 | -1,69 | 0,14167 | NM_017413       | C17orf74     |  |
| 8004400 | -1,30 | -2,47 | 0,05936 | -1,27 | -2,41 | 0,00265 | NM_175734       | DCAF12L1     |  |
| 8174972 | -1,30 | -2,47 | 0,01278 | -2,06 | -4,17 | 0,00001 | NM_178470       | C10orf140    |  |
| 7932498 | -1,30 | -2,47 | 0,02672 | -0,73 | -1,66 | 0,01143 | NM_207371       | ---          |  |
| 8167953 | -1,30 | -2,47 | 0,00053 | -1,18 | -2,27 | 0,05300 | ---             | IRF7         |  |
| 7945462 | -1,30 | -2,47 | 0,06955 | -0,66 | -1,58 | 0,14274 | NM_004031       | ---          |  |
| 7898607 | -1,30 | -2,47 | 0,02319 | -0,99 | -1,99 | 0,00413 | ---             | ---          |  |
| 8159917 | -1,30 | -2,47 | 0,05299 | -1,06 | -2,08 | 0,00327 | ---             | ODF3L1       |  |
| 7985025 | -1,30 | -2,47 | 0,00884 | -2,17 | -4,50 | 0,00954 | NM_175881       | ---          |  |
| 7952599 | -1,30 | -2,47 | 0,05947 | -1,56 | -2,95 | 0,00017 | ---             | ECEL1P2      |  |
| 8059744 | -1,30 | -2,47 | 0,09811 | -1,34 | -2,53 | 0,02387 | NR_028501       | LGALS8       |  |
| 7925361 | -1,30 | -2,47 | 0,01589 | -1,16 | -2,23 | 0,04631 | NM_006499       | ---          |  |
| 8117138 | -1,30 | -2,47 | 0,13516 | -1,62 | -3,07 | 0,01597 | ---             | ---          |  |
| 8113232 | -1,30 | -2,47 | 0,07477 | -0,98 | -1,97 | 0,02808 | ---             | ---          |  |
| 7925607 | -1,30 | -2,47 | 0,01703 | -1,18 | -2,27 | 0,00110 | ---             | PDE2A        |  |
| 7950162 | -1,30 | -2,47 | 0,03277 | -0,56 | -1,47 | 0,01755 | NM_002599       | LOC643837    |  |
| 7896759 | -1,30 | -2,47 | 0,04986 | 0,70  | 1,62  | 0,30521 | AK096570        | GP2          |  |
| 7999920 | -1,30 | -2,47 | 0,00358 | -0,97 | -1,96 | 0,01015 | NM_001007240    | DFNB31       |  |
| 8163599 | -1,30 | -2,47 | 0,01058 | -0,45 | -1,36 | 0,43310 | NM_015404       | HOXD8        |  |
| 8046546 | -1,30 | -2,47 | 0,03441 | -0,73 | -1,66 | 0,02701 | NM_019558       | RAET1L       |  |
| 8130173 | -1,30 | -2,47 | 0,01616 | 0,38  | 1,30  | 0,56755 | NM_130900       | TYRO3        |  |
| 7982938 | -1,30 | -2,47 | 0,01962 | 1,93  | 3,80  | 0,02001 | NM_006293       | CNKSR1       |  |
| 7899101 | -1,30 | -2,47 | 0,03545 | 2,42  | 5,35  | 0,00221 | NM_006314       | PRAM1        |  |
| 8033587 | -1,31 | -2,47 | 0,03100 | -1,96 | -3,90 | 0,00003 | NM_032152       | CEACAM6      |  |
| 8029098 | -1,31 | -2,47 | 0,07816 | 0,43  | 1,34  | 0,23357 | NM_002483       | ---          |  |
| 8100476 | -1,31 | -2,47 | 0,03363 | -1,09 | -2,13 | 0,04702 | ---             | DLL3         |  |
| 8028719 | -1,31 | -2,47 | 0,03415 | -0,54 | -1,46 | 0,04208 | NM_016941       | HORMAD2      |  |
| 8072304 | -1,31 | -2,47 | 0,03452 | -0,09 | -1,07 | 0,77359 | NM_152510       | ---          |  |
| 8129761 | -1,31 | -2,47 | 0,04050 | -1,28 | -2,43 | 0,00262 | ---             | CLVS2        |  |
| 8121803 | -1,31 | -2,47 | 0,01354 | -1,85 | -3,62 | 0,00239 | NM_001010852    | CTAGE1       |  |
| 8022508 | -1,31 | -2,47 | 0,05850 | -1,04 | -2,05 | 0,01534 | NM_172241       | MEGF6        |  |
| 7911799 | -1,31 | -2,47 | 0,01907 | -1,05 | -2,06 | 0,11644 | NM_001409       | PHLDA3       |  |
| 7923372 | -1,31 | -2,47 | 0,00594 | -1,06 | -2,09 | 0,04822 | NM_012396       | SPDYC        |  |
| 7941172 | -1,31 | -2,47 | 0,04892 | -1,61 | -3,06 | 0,00151 | NM_001008778    | FLJ27255     |  |
| 8130553 | -1,31 | -2,47 | 0,06413 | -1,44 | -2,71 | 0,06133 | AK130765        | ---          |  |
| 7928815 | -1,31 | -2,47 | 0,01628 | -1,64 | -3,12 | 0,00080 | ---             | KIR2DS2      |  |
| 8039842 | -1,31 | -2,48 | 0,09745 | -2,43 | -5,38 | 0,00058 | NM_012312       | ---          |  |
| 7947228 | -1,31 | -2,48 | 0,00351 | -1,14 | -2,21 | 0,01479 | ---             | FZD8         |  |
| 7933075 | -1,31 | -2,48 | 0,02587 | -0,91 | -1,88 | 0,03310 | NM_031866       | ---          |  |

|         |       |       |         |       |        |         |                 |              |           |
|---------|-------|-------|---------|-------|--------|---------|-----------------|--------------|-----------|
| 7965671 | -1,31 | -2,48 | 0,00249 | -1,51 | -2,85  | 0,00434 | ---             | ---          |           |
| 8175591 | -1,31 | -2,48 | 0,03967 | -0,79 | -1,73  | 0,01668 | ---             | NPSR1        |           |
| 8132270 | -1,31 | -2,48 | 0,05358 | -1,39 | -2,62  | 0,01115 | NM_207172       |              | PSD4      |
| 8044584 | -1,31 | -2,48 | 0,01307 | -0,57 | -1,48  | 0,13509 | NM_012455       |              | ---       |
| 7972748 | -1,31 | -2,48 | 0,17819 | -1,38 | -2,60  | 0,02541 | ---             | DUOX1        |           |
| 7983413 | -1,31 | -2,48 | 0,05635 | 0,12  | 1,08   | 0,77734 | NM_017434       |              | CRLF1     |
| 8035506 | -1,31 | -2,48 | 0,05949 | -0,97 | -1,96  | 0,10351 | NM_004750       |              | ---       |
| 7919556 | -1,31 | -2,48 | 0,09227 | -1,89 | -3,72  | 0,00014 | ---             | CDK5R2       |           |
| 8048460 | -1,31 | -2,48 | 0,01132 | -0,70 | -1,63  | 0,26599 | NM_003936       |              | DEAF1     |
| 7945503 | -1,31 | -2,48 | 0,00467 | 0,01  | 1,01   | 0,97296 | NM_021008       |              | ---       |
| 8022745 | -1,31 | -2,48 | 0,03108 | -1,62 | -3,07  | 0,00839 | ---             | MAPK8IP1     |           |
| 7939613 | -1,31 | -2,48 | 0,03665 | -0,31 | -1,24  | 0,62899 | NM_005456       |              | TNFSF9    |
| 8025053 | -1,31 | -2,48 | 0,01039 | 1,40  | 2,63   | 0,18017 | NM_003811       |              | NKAIN1    |
| 7914326 | -1,31 | -2,48 | 0,02700 | -0,19 | -1,14  | 0,77251 | NM_024522       |              | PP13004   |
| 8132302 | -1,31 | -2,48 | 0,09977 | -1,48 | -2,79  | 0,13855 | ENST00000381493 |              | C20orf151 |
| 8067506 | -1,31 | -2,48 | 0,02390 | -1,32 | -2,49  | 0,00046 | NM_080833       |              | CDH4      |
| 8063796 | -1,31 | -2,48 | 0,06764 | -0,74 | -1,66  | 0,00256 | NM_001794       |              | ---       |
| 8105479 | -1,31 | -2,48 | 0,11406 | -1,45 | -2,74  | 0,00293 | ---             | ---          |           |
| 8134403 | -1,31 | -2,48 | 0,34085 | -1,83 | -3,56  | 0,06412 | ---             | CELFA        |           |
| 8022952 | -1,31 | -2,48 | 0,05343 | -0,86 | -1,82  | 0,04464 | NM_020180       |              | KIF7      |
| 7991296 | -1,31 | -2,48 | 0,00113 | -0,50 | -1,41  | 0,05694 | NM_198525       |              | ---       |
| 8065194 | -1,31 | -2,48 | 0,09607 | -2,02 | -4,06  | 0,00638 | ---             | MPST         |           |
| 8072777 | -1,31 | -2,48 | 0,01744 | -1,12 | -2,17  | 0,04843 | NR_024038       |              | UBE2J2    |
| 7911444 | -1,31 | -2,48 | 0,16719 | -0,47 | -1,39  | 0,07936 | NM_194458       |              | ---       |
| 7901334 | -1,31 | -2,48 | 0,04580 | -1,19 | -2,28  | 0,00104 | ---             | FATE1        |           |
| 8170513 | -1,31 | -2,48 | 0,00593 | -1,14 | -2,20  | 0,00161 | NM_033085       |              | C5AR1     |
| 8029907 | -1,31 | -2,48 | 0,01338 | 0,13  | 1,09   | 0,40755 | NM_001736       |              | CT47B1    |
| 8174831 | -1,31 | -2,48 | 0,10844 | -1,64 | -3,12  | 0,02949 | NM_001145718    |              | HOXB9     |
| 8016476 | -1,31 | -2,48 | 0,12035 | 0,77  | 1,70   | 0,28221 | NM_024017       |              | ARID3C    |
| 8160849 | -1,31 | -2,48 | 0,00920 | -1,44 | -2,71  | 0,00233 | NM_001017363    |              | ---       |
| 7905077 | -1,31 | -2,48 | 0,01821 | 0,22  | 1,17   | 0,64898 | ---             | ---          |           |
| 8124082 | -1,31 | -2,48 | 0,16283 | -1,02 | -2,02  | 0,00438 | ---             | LOC100133746 |           |
| 7990827 | -1,31 | -2,48 | 0,01094 | -1,03 | -2,04  | 0,01060 | ENST00000447682 |              | C20orf203 |
| 8065630 | -1,31 | -2,48 | 0,20307 | -1,70 | -3,26  | 0,01285 | NM_182584       |              | LCAT      |
| 8002143 | -1,31 | -2,48 | 0,00502 | -0,85 | -1,80  | 0,15163 | NM_000229       |              | ---       |
| 8140737 | -1,31 | -2,48 | 0,25837 | -3,45 | -10,94 | 0,00088 | ---             | ---          |           |
| 8166712 | -1,31 | -2,48 | 0,05675 | -1,66 | -3,15  | 0,00855 | ---             | LOC100288144 |           |
| 7981488 | -1,31 | -2,48 | 0,10139 | -2,58 | -5,99  | 0,01365 | AF462446        |              | ---       |
| 8142661 | -1,31 | -2,48 | 0,05781 | -0,90 | -1,86  | 0,01820 | ---             | SYT13        |           |
| 7947590 | -1,31 | -2,48 | 0,00380 | -0,85 | -1,80  | 0,02092 | NM_020826       |              | ITLN1     |
| 7921690 | -1,31 | -2,48 | 0,08539 | -1,02 | -2,02  | 0,00901 | NM_017625       |              | APOBEC4   |
| 7922804 | -1,31 | -2,48 | 0,00498 | -1,47 | -2,77  | 0,00255 | NM_203454       |              | ---       |
| 8063024 | -1,31 | -2,49 | 0,01675 | -1,19 | -2,28  | 0,00053 | ---             | ---          |           |
| 8086368 | -1,31 | -2,49 | 0,02940 | -1,75 | -3,35  | 0,00950 | ---             | ---          |           |
| 8112519 | -1,31 | -2,49 | 0,33838 | -3,77 | -13,68 | 0,00243 | ---             | ---          |           |
| 8066962 | -1,31 | -2,49 | 0,01401 | -1,34 | -2,54  | 0,04279 | ---             | LOC728690    |           |
| 7911657 | -1,31 | -2,49 | 0,05263 | -0,66 | -1,58  | 0,01234 | AK094642        |              | OR10R2    |
| 7906367 | -1,31 | -2,49 | 0,09896 | -1,77 | -3,41  | 0,00854 | NM_001004472    |              | LOC146429 |
| 8003444 | -1,31 | -2,49 | 0,02014 | -0,73 | -1,66  | 0,17642 | ENST00000333222 |              | ---       |
| 7978662 | -1,31 | -2,49 | 0,00640 | -1,92 | -3,78  | 0,01070 | ---             | ---          |           |
| 8136215 | -1,31 | -2,49 | 0,00376 | -1,06 | -2,09  | 0,00343 | ---             | TNFRSF9      |           |
| 7912145 | -1,31 | -2,49 | 0,00192 | 1,31  | 2,48   | 0,00064 | NM_001561       |              | LOC407835 |
| 8136065 | -1,31 | -2,49 | 0,00438 | -0,98 | -1,98  | 0,09163 | NR_002144       |              | ALDH1A2   |
| 7989199 | -1,31 | -2,49 | 0,01931 | -1,07 | -2,11  | 0,02325 | NM_003888       |              | GPX6      |
| 8124588 | -1,31 | -2,49 | 0,04318 | -1,11 | -2,16  | 0,02118 | NM_182701       |              | TTTY5     |
| 8177344 | -1,31 | -2,49 | 0,10952 | -1,97 | -3,93  | 0,00033 | NR_001541       |              | C6orf25   |
| 8178074 | -1,32 | -2,49 | 0,00455 | -1,79 | -3,45  | 0,00862 | NM_138277       |              | HCRT      |
| 8015572 | -1,32 | -2,49 | 0,07989 | -1,73 | -3,31  | 0,00015 | NM_001524       |              | ---       |
| 7966568 | -1,32 | -2,49 | 0,13200 | -1,47 | -2,77  | 0,00865 | ---             | ---          |           |
| 8122277 | -1,32 | -2,49 | 0,00294 | -1,03 | -2,04  | 0,03086 | ---             | IRX2         |           |
| 8110872 | -1,32 | -2,49 | 0,04604 | -2,03 | -4,10  | 0,00063 | NM_033267       |              | HCG27     |
| 8177951 | -1,32 | -2,49 | 0,11821 | -2,00 | -4,01  | 0,07417 | NR_026791       |              | C16orf74  |
| 8003210 | -1,32 | -2,49 | 0,08477 | 0,12  | 1,08   | 0,83434 | NM_206967       |              | ---       |
| 8099142 | -1,32 | -2,49 | 0,01190 | -1,06 | -2,09  | 0,00119 | ---             | ---          |           |
| 8065392 | -1,32 | -2,49 | 0,01595 | -1,64 | -3,11  | 0,00481 | ---             | ---          |           |
| 8001798 | -1,32 | -2,49 | 0,10022 | -1,46 | -2,75  | 0,00857 | ---             | NFAM1        |           |
| 8076441 | -1,32 | -2,49 | 0,00653 | -1,04 | -2,05  | 0,08999 | NM_145912       |              | TGIF2LX   |
| 8168646 | -1,32 | -2,49 | 0,01196 | -1,47 | -2,78  | 0,01067 | NM_138960       |              | ---       |
| 8066444 | -1,32 | -2,49 | 0,12460 | 0,02  | 1,02   | 0,95529 | ---             | ---          |           |
| 8120464 | -1,32 | -2,49 | 0,03004 | -2,17 | -4,49  | 0,00346 | ---             | ---          |           |
| 8082406 | -1,32 | -2,49 | 0,20797 | -0,74 | -1,67  | 0,17056 | ---             | CSN2         |           |
| 8100819 | -1,32 | -2,49 | 0,01787 | -0,68 | -1,60  | 0,00224 | NM_001891       |              | LOC494150 |
| 7963261 | -1,32 | -2,49 | 0,01864 | -0,23 | -1,17  | 0,33527 | AK292677        |              | PITX1     |

|         |       |       |         |       |        |         |                 |              |
|---------|-------|-------|---------|-------|--------|---------|-----------------|--------------|
| 8114215 | -1,32 | -2,49 | 0,00435 | -0,35 | -1,27  | 0,24878 | NM_002653       | TAAR6        |
| 8122131 | -1,32 | -2,49 | 0,02205 | -0,61 | -1,53  | 0,00059 | NM_175067       | ---          |
| 8121741 | -1,32 | -2,49 | 0,02408 | -0,82 | -1,76  | 0,01621 | ---             | CCL5         |
| 8014316 | -1,32 | -2,49 | 0,00425 | -1,22 | -2,33  | 0,00207 | NM_002985       | ---          |
| 8059648 | -1,32 | -2,49 | 0,16541 | -1,47 | -2,78  | 0,03641 | ---             | ---          |
| 8033460 | -1,32 | -2,49 | 0,01971 | -1,73 | -3,32  | 0,00848 | ---             | SPDEF        |
| 8125843 | -1,32 | -2,49 | 0,04350 | -0,62 | -1,54  | 0,14297 | NM_012391       | C16orf48     |
| 8002072 | -1,32 | -2,49 | 0,01259 | -1,53 | -2,88  | 0,07355 | BC008284 FAM27L | ---          |
| 8005739 | -1,32 | -2,49 | 0,16426 | -1,46 | -2,75  | 0,00279 | NR_028336       | SEMA4F       |
| 8053263 | -1,32 | -2,49 | 0,08973 | -1,09 | -2,13  | 0,01856 | NM_004263       | ---          |
| 7950372 | -1,32 | -2,50 | 0,01371 | -1,01 | -2,01  | 0,01915 | ---             | CCR6         |
| 8123372 | -1,32 | -2,50 | 0,14351 | -2,21 | -4,62  | 0,00006 | BX647686 DDT    | ---          |
| 8071806 | -1,32 | -2,50 | 0,00068 | -0,18 | -1,13  | 0,54270 | NM_001355       | RGS9BP       |
| 8027480 | -1,32 | -2,50 | 0,03064 | -0,69 | -1,61  | 0,00063 | NM_207391       | OR8S1        |
| 7955129 | -1,32 | -2,50 | 0,01484 | -1,45 | -2,74  | 0,01983 | NM_001005203    | POU5F1       |
| 8124889 | -1,32 | -2,50 | 0,01337 | -1,89 | -3,72  | 0,00008 | NM_002701       | POU5F1       |
| 8179719 | -1,32 | -2,50 | 0,01337 | -1,89 | -3,72  | 0,00008 | NM_002701       | LOC100288797 |
| 8060533 | -1,32 | -2,50 | 0,01917 | -0,87 | -1,83  | 0,01121 | NM_001167670    | PLA2G10      |
| 7999588 | -1,32 | -2,50 | 0,13655 | -0,46 | -1,37  | 0,42971 | NM_003561       | SPDYE1       |
| 8132531 | -1,32 | -2,50 | 0,17507 | -2,44 | -5,44  | 0,00001 | NM_175064       | ---          |
| 8175662 | -1,32 | -2,50 | 0,03960 | -0,94 | -1,92  | 0,04452 | ---             | OR1L3        |
| 8157684 | -1,32 | -2,50 | 0,20436 | -1,36 | -2,57  | 0,01818 | NM_001005234    | ---          |
| 8163000 | -1,32 | -2,50 | 0,27619 | -1,39 | -2,63  | 0,03603 | ---             | KCNC1        |
| 7938738 | -1,32 | -2,50 | 0,02499 | -1,75 | -3,35  | 0,00059 | NM_004976       | ---          |
| 7899811 | -1,32 | -2,50 | 0,06049 | -1,03 | -2,04  | 0,01102 | ---             | KISS1R       |
| 8024070 | -1,32 | -2,50 | 0,01982 | -0,04 | -1,03  | 0,90992 | NM_032551       | PTPRN2       |
| 8144121 | -1,32 | -2,50 | 0,00179 | -1,36 | -2,58  | 0,05931 | NM_002847       | C3orf30      |
| 8081822 | -1,32 | -2,50 | 0,01740 | -1,46 | -2,75  | 0,02399 | NM_152539       | ---          |
| 7948139 | -1,32 | -2,50 | 0,23756 | -1,64 | -3,12  | 0,00278 | ---             | UBQLN4       |
| 8091352 | -1,32 | -2,50 | 0,11133 | -0,53 | -1,45  | 0,05811 | NM_020131       | ---          |
| 8169461 | -1,32 | -2,50 | 0,03427 | -1,12 | -2,17  | 0,04684 | ---             | PHLPP1       |
| 8023644 | -1,32 | -2,50 | 0,00623 | -1,29 | -2,45  | 0,03465 | ENST00000420025 | ADRB2        |
| 8109086 | -1,32 | -2,50 | 0,00083 | -0,53 | -1,44  | 0,14749 | NM_000024       | ---          |
| 7995419 | -1,32 | -2,50 | 0,00805 | -1,76 | -3,39  | 0,01101 | ---             | ---          |
| 8063547 | -1,32 | -2,50 | 0,02120 | -1,61 | -3,06  | 0,00089 | ---             | ---          |
| 7917468 | -1,32 | -2,50 | 0,24303 | -1,03 | -2,05  | 0,08915 | ---             | SCGB2A2      |
| 7940636 | -1,32 | -2,50 | 0,04504 | -1,90 | -3,74  | 0,00856 | NM_002411       | SYNPO2L      |
| 7934442 | -1,32 | -2,50 | 0,00256 | -0,33 | -1,26  | 0,01498 | NM_001114133    | MIR95        |
| 8099302 | -1,32 | -2,50 | 0,01174 | -1,01 | -2,01  | 0,00704 | NR_029511       | ---          |
| 8021478 | -1,32 | -2,50 | 0,03630 | -0,47 | -1,38  | 0,22304 | ---             | ---          |
| 7942379 | -1,32 | -2,50 | 0,24162 | -1,33 | -2,51  | 0,00555 | ---             | ---          |
| 8097751 | -1,32 | -2,50 | 0,07656 | -1,25 | -2,38  | 0,06649 | ---             | ZXDA         |
| 8173201 | -1,32 | -2,50 | 0,04111 | -3,13 | -8,78  | 0,00023 | NM_007156       | OR52B2       |
| 7946125 | -1,32 | -2,50 | 0,05240 | -1,75 | -3,36  | 0,00612 | NM_001004052    | TPRN         |
| 8165478 | -1,32 | -2,50 | 0,03269 | -1,09 | -2,13  | 0,03415 | NM_173691       | MIR375       |
| 8059026 | -1,32 | -2,50 | 0,11334 | -1,35 | -2,56  | 0,01785 | NR_029867       | LOC100130274 |
| 8153486 | -1,32 | -2,50 | 0,06234 | -1,23 | -2,35  | 0,01762 | NM_001162914    | BTC          |
| 8101002 | -1,32 | -2,50 | 0,00442 | -0,28 | -1,21  | 0,26961 | NM_001729       | ---          |
| 8111284 | -1,32 | -2,50 | 0,08553 | -2,47 | -5,56  | 0,00567 | ---             | C19orf63     |
| 8030706 | -1,32 | -2,50 | 0,12557 | -1,18 | -2,27  | 0,02637 | NM_175063       | PAGE3        |
| 8173168 | -1,32 | -2,50 | 0,21086 | -0,62 | -1,53  | 0,00331 | NR_033460       | INGX         |
| 8173486 | -1,32 | -2,50 | 0,07796 | -0,19 | -1,14  | 0,54380 | NR_002226       | ---          |
| 8141661 | -1,32 | -2,51 | 0,01062 | -1,21 | -2,32  | 0,01226 | ---             | ---          |
| 7903181 | -1,32 | -2,51 | 0,05047 | -1,10 | -2,14  | 0,05947 | ---             | ABI3         |
| 8008185 | -1,32 | -2,51 | 0,00108 | -1,10 | -2,14  | 0,00077 | NM_016428       | LOC151760    |
| 8089464 | -1,32 | -2,51 | 0,00392 | -1,12 | -2,17  | 0,01850 | ENST00000383686 | H2AFB1       |
| 8171026 | -1,33 | -2,51 | 0,00591 | -0,73 | -1,66  | 0,00581 | NM_001017990    | LOC401557    |
| 8159235 | -1,33 | -2,51 | 0,02742 | -1,40 | -2,65  | 0,02439 | AK127261        | ---          |
| 8111122 | -1,33 | -2,51 | 0,02073 | -1,96 | -3,89  | 0,00110 | ---             | SLC6A4       |
| 8013989 | -1,33 | -2,51 | 0,05313 | -1,43 | -2,69  | 0,00097 | NM_001045       | ---          |
| 8155877 | -1,33 | -2,51 | 0,02582 | -1,35 | -2,55  | 0,03104 | ---             | CHADL        |
| 8076302 | -1,33 | -2,51 | 0,08777 | -1,67 | -3,17  | 0,00533 | NM_138481       | LRRFIP1      |
| 8049536 | -1,33 | -2,51 | 0,10118 | -2,29 | -4,88  | 0,01285 | NM_001137550    | C5orf20      |
| 8114239 | -1,33 | -2,51 | 0,04090 | -1,09 | -2,13  | 0,05784 | NM_130848       | ARHGEF15     |
| 8004842 | -1,33 | -2,51 | 0,01808 | -1,31 | -2,49  | 0,01067 | NM_173728       | MUC12        |
| 8135033 | -1,33 | -2,51 | 0,51198 | -3,62 | -12,29 | 0,00122 | NM_001164462    | LYZL2        |
| 7932864 | -1,33 | -2,51 | 0,06429 | -1,19 | -2,29  | 0,06971 | NM_183058       | SPATA3       |
| 8049007 | -1,33 | -2,51 | 0,10185 | -1,78 | -3,44  | 0,01323 | NM_139073       | WNT4         |
| 7913547 | -1,33 | -2,51 | 0,06952 | -1,00 | -2,00  | 0,04464 | NM_030761       | IL22RA1      |
| 7913768 | -1,33 | -2,51 | 0,02459 | -0,17 | -1,13  | 0,77272 | NM_021258       | ---          |
| 8086876 | -1,33 | -2,51 | 0,00399 | -1,97 | -3,91  | 0,00480 | ---             | DRGX         |
| 7933501 | -1,33 | -2,51 | 0,02650 | -1,51 | -2,85  | 0,00031 | NM_001080520    | TCERG1L      |
| 7937059 | -1,33 | -2,51 | 0,00275 | -1,86 | -3,63  | 0,00053 | NM_174937       | C17orf106    |

|                                                                                                                                                                                                                                     |       |       |         |       |        |         |                                    |                                    |
|-------------------------------------------------------------------------------------------------------------------------------------------------------------------------------------------------------------------------------------|-------|-------|---------|-------|--------|---------|------------------------------------|------------------------------------|
| 8010012                                                                                                                                                                                                                             | -1,33 | -2,51 | 0,01984 | 0,54  | 1,46   | 0,30498 | NM_001113324                       | KRT26                              |
| 8015078                                                                                                                                                                                                                             | -1,33 | -2,51 | 0,02875 | -0,56 | -1,47  | 0,06386 | NM_181539                          | SCARF1                             |
| 8011114                                                                                                                                                                                                                             | -1,33 | -2,51 | 0,01011 | -1,07 | -2,10  | 0,00298 | NR_028076                          | ---                                |
| 8150685                                                                                                                                                                                                                             | -1,33 | -2,51 | 0,00121 | -1,22 | -2,33  | 0,08459 | ---                                | A4GNT                              |
| 8090955                                                                                                                                                                                                                             | -1,33 | -2,51 | 0,00108 | -0,94 | -1,92  | 0,00384 | NM_016161                          | VSIG6                              |
| 7981732                                                                                                                                                                                                                             | -1,33 | -2,51 | 0,08823 | -2,22 | -4,64  | 0,00289 | ENST00000338567                    | ---                                |
| 8106120                                                                                                                                                                                                                             | -1,33 | -2,51 | 0,10227 | -0,04 | -1,03  | 0,96915 | ---                                | BCL6B                              |
| 8004255                                                                                                                                                                                                                             | -1,33 | -2,51 | 0,04962 | -1,11 | -2,15  | 0,00275 | NM_181844                          | ---                                |
| 8136063                                                                                                                                                                                                                             | -1,33 | -2,51 | 0,04554 | -1,65 | -3,13  | 0,00019 | ---                                | KIAA1045                           |
| 8154953                                                                                                                                                                                                                             | -1,33 | -2,51 | 0,01626 | -1,74 | -3,34  | 0,00087 | NM_015297                          | RBM33                              |
| 8137558                                                                                                                                                                                                                             | -1,33 | -2,51 | 0,02745 | -0,19 | -1,14  | 0,33642 | NM_053043                          | ---                                |
| 8168422                                                                                                                                                                                                                             | -1,33 | -2,51 | 0,04421 | -0,84 | -1,79  | 0,18748 | ---                                | CYP2W1                             |
| 8131056                                                                                                                                                                                                                             | -1,33 | -2,51 | 0,02313 | -1,66 | -3,15  | 0,00138 | NM_017781                          | PRR15L                             |
| 8016387                                                                                                                                                                                                                             | -1,33 | -2,51 | 0,09325 | -1,08 | -2,12  | 0,08174 | NM_024320                          | ---                                |
| 7973968                                                                                                                                                                                                                             | -1,33 | -2,51 | 0,02694 | -1,02 | -2,03  | 0,01208 | ---                                | ---                                |
| 7960848                                                                                                                                                                                                                             | -1,33 | -2,51 | 0,00026 | -1,34 | -2,53  | 0,00023 | ---                                | UNQ5830                            |
| 8050227                                                                                                                                                                                                                             | -1,33 | -2,51 | 0,06489 | -1,50 | -2,83  | 0,05902 | AY358123                           | CABP7                              |
| 8072266                                                                                                                                                                                                                             | -1,33 | -2,51 | 0,10824 | -1,10 | -2,15  | 0,00228 | NM_182527                          | ---                                |
| 8144582                                                                                                                                                                                                                             | -1,33 | -2,51 | 0,00685 | -1,22 | -2,33  | 0,00195 | ---                                | SLC5A11                            |
| 7994216                                                                                                                                                                                                                             | -1,33 | -2,51 | 0,05827 | -1,16 | -2,23  | 0,00216 | NM_052944                          | THAP8                              |
| 8036270                                                                                                                                                                                                                             | -1,33 | -2,51 | 0,02842 | -1,00 | -2,00  | 0,00909 | NM_152658                          | ZNF573                             |
| 8036444                                                                                                                                                                                                                             | -1,33 | -2,51 | 0,03534 | -0,93 | -1,90  | 0,00794 | NM_152360                          | UBXN11                             |
| 7913918                                                                                                                                                                                                                             | -1,33 | -2,51 | 0,02559 | -0,68 | -1,61  | 0,04385 | NM_183008                          | OTOP2                              |
| 8009705                                                                                                                                                                                                                             | -1,33 | -2,51 | 0,07250 | -1,38 | -2,60  | 0,00086 | NM_178160                          | NAT2                               |
| 8144866                                                                                                                                                                                                                             | -1,33 | -2,51 | 0,00062 | -0,56 | -1,47  | 0,04442 | NM_000015                          | GJC2                               |
| 7910257                                                                                                                                                                                                                             | -1,33 | -2,51 | 0,06060 | -1,38 | -2,61  | 0,07046 | NM_020435                          | CLEC10A                            |
| 8012013                                                                                                                                                                                                                             | -1,33 | -2,51 | 0,00638 | -1,53 | -2,88  | 0,00890 | NM_182906                          | ---                                |
| 8168115                                                                                                                                                                                                                             | -1,33 | -2,51 | 0,11832 | -1,48 | -2,78  | 0,00074 | ---                                | LOC646359                          |
| 8022426                                                                                                                                                                                                                             | -1,33 | -2,51 | 0,03148 | -1,16 | -2,23  | 0,00995 | ENST00000342224                    | ---                                |
| 8168555                                                                                                                                                                                                                             | -1,33 | -2,51 | 0,01094 | -1,52 | -2,87  | 0,01034 | ---                                | MIR1-2                             |
| 8022500                                                                                                                                                                                                                             | -1,33 | -2,52 | 0,04116 | -1,01 | -2,02  | 0,00221 | NR_029662                          | MON1A                              |
| 8087568                                                                                                                                                                                                                             | -1,33 | -2,52 | 0,00362 | -0,46 | -1,38  | 0,02929 | NM_032355                          | SPDYE2                             |
| 8141750                                                                                                                                                                                                                             | -1,33 | -2,52 | 0,28930 | -2,16 | -4,46  | 0,00025 | NM_001031618                       | FAM83F                             |
| 8073207                                                                                                                                                                                                                             | -1,33 | -2,52 | 0,02028 | -1,12 | -2,18  | 0,18238 | NM_138435                          | ---                                |
| 8043405                                                                                                                                                                                                                             | -1,33 | -2,52 | 0,00545 | -1,51 | -2,86  | 0,06596 | ---                                | TBC1D24                            |
| 7992639                                                                                                                                                                                                                             | -1,33 | -2,52 | 0,00220 | 0,08  | 1,06   | 0,89728 | NM_020705                          | MIR132                             |
| 8011218                                                                                                                                                                                                                             | -1,33 | -2,52 | 0,02928 | -1,17 | -2,25  | 0,01172 | NR_029674                          | APOE                               |
| 8029530                                                                                                                                                                                                                             | -1,33 | -2,52 | 0,01799 | -1,03 | -2,04  | 0,10171 | NM_000041                          | LOC440131                          |
| 7968323                                                                                                                                                                                                                             | -1,33 | -2,52 | 0,00135 | -1,22 | -2,34  | 0,03377 | ENST00000400540                    | DPPA3                              |
| 7953665                                                                                                                                                                                                                             | -1,33 | -2,52 | 0,24062 | -1,79 | -3,45  | 0,05807 | NM_199286                          | CHRNA2                             |
| 8149918                                                                                                                                                                                                                             | -1,33 | -2,52 | 0,02147 | -1,20 | -2,30  | 0,00033 | NM_000742                          | OR7E87P // OR7E87P                 |
| // OR7E87P                                                                                                 |       |       |         |       |        |         |                                    |                                    |
| // OR7E87P                                                                                                 |       |       |         |       |        |         |                                    |                                    |
| 7949896                                                                                                                                                                                                                             | -1,33 | -2,52 | 0,33962 | -3,53 | -11,54 | 0,00040 | ENST00000454336 // ENST00000454336 | ENST00000454336 // ENST00000454336 |
| // ENST00000454336 |       |       |         |       |        |         |                                    |                                    |
| // ENST00000454336 |       |       |         |       |        |         |                                    |                                    |
| // ENST00000454336 |       |       |         |       |        |         |                                    |                                    |
| // ENST00000454336 |       |       |         |       |        |         |                                    |                                    |
| 8036133                                                                                                                                                                                                                             | -1,33 | -2,52 | 0,00327 | -0,36 | -1,29  | 0,31638 | NM_007000                          | ---                                |
| 8104611                                                                                                                                                                                                                             | -1,33 | -2,52 | 0,00152 | -1,95 | -3,87  | 0,00055 | ---                                | SPDYE8P                            |
| 8133590                                                                                                                                                                                                                             | -1,33 | -2,52 | 0,19782 | -2,54 | -5,82  | 0,00089 | NR_003664                          | EVPL                               |
| 8018579                                                                                                                                                                                                                             | -1,33 | -2,52 | 0,04569 | -0,53 | -1,44  | 0,23471 | NM_001988                          | HTR3B                              |
| 7943958                                                                                                                                                                                                                             | -1,33 | -2,52 | 0,04026 | -1,06 | -2,09  | 0,02731 | NM_006028                          | TSPY1                              |
| 8176524                                                                                                                                                                                                                             | -1,33 | -2,52 | 0,05033 | -1,22 | -2,32  | 0,00002 | NM_003308                          | HDLBP                              |
| 8049825                                                                                                                                                                                                                             | -1,33 | -2,52 | 0,07523 | -0,87 | -1,82  | 0,04201 | NM_005336                          | ---                                |
| 8043441                                                                                                                                                                                                                             | -1,33 | -2,52 | 0,13570 | -1,76 | -3,39  | 0,01092 | ---                                | ---                                |
| 7986338                                                                                                                                                                                                                             | -1,33 | -2,52 | 0,02046 | -1,83 | -3,56  | 0,00020 | ---                                | ---                                |
| 8065550                                                                                                                                                                                                                             | -1,34 | -2,52 | 0,30997 | -3,76 | -13,56 | 0,00004 | ---                                | GCHFR                              |
| 7982805                                                                                                                                                                                                                             | -1,34 | -2,52 | 0,05505 | 0,19  | 1,14   | 0,63537 | NM_005258                          | CAPN12                             |
| 8036563                                                                                                                                                                                                                             | -1,34 | -2,52 | 0,00746 | -0,64 | -1,56  | 0,06347 | NM_144691                          | ---                                |
| 7961067                                                                                                                                                                                                                             | -1,34 | -2,52 | 0,02460 | -1,21 | -2,31  | 0,00310 | ---                                | C20orf141                          |
| 8060528                                                                                                                                                                                                                             | -1,34 | -2,52 | 0,00612 | -2,46 | -5,49  | 0,00342 | NM_080739                          | MIR200A                            |
| 7896861                                                                                                                                                                                                                             | -1,34 | -2,52 | 0,02979 | -0,67 | -1,59  | 0,03481 | NR_029834                          | TCP10                              |
| 8123374                                                                                                                                                                                                                             | -1,34 | -2,52 | 0,00891 | -1,16 | -2,24  | 0,00003 | NM_004610                          | ADAMTS8                            |
| 7952752                                                                                                                                                                                                                             | -1,34 | -2,52 | 0,00012 | -1,55 | -2,93  | 0,00472 | NM_007037                          | ---                                |
| 8172656                                                                                                                                                                                                                             | -1,34 | -2,52 | 0,00460 | -1,73 | -3,33  | 0,00064 | ---                                | ELOVL3                             |
| 7930025                                                                                                                                                                                                                             | -1,34 | -2,52 | 0,06199 | -0,38 | -1,30  | 0,22717 | NM_152310                          | OR4C12                             |
| 7948090                                                                                                                                                                                                                             | -1,34 | -2,52 | 0,00369 | -1,52 | -2,86  | 0,00477 | NM_001005270                       | CARD18                             |
| 7951417                                                                                                                                                                                                                             | -1,34 | -2,52 | 0,03482 | -1,54 | -2,92  | 0,00563 | NM_021571                          | PACRG                              |
| 8123303                                                                                                                                                                                                                             | -1,34 | -2,52 | 0,00045 | -0,87 | -1,82  | 0,02382 | NM_152410                          | HOXC13                             |
| 7955845                                                                                                                                                                                                                             | -1,34 | -2,52 | 0,01327 | -0,09 | -1,06  | 0,83455 | NM_017410                          | STMN4                              |
| 8149898                                                                                                                                                                                                                             | -1,34 | -2,52 | 0,00268 | -1,02 | -2,02  | 0,00276 | NM_030795                          | ---                                |
| 8112157                                                                                                                                                                                                                             | -1,34 | -2,53 | 0,00256 | -1,49 | -2,81  | 0,00096 | ---                                | TFCP2L1                            |

|         |       |       |         |       |       |         |                 |              |
|---------|-------|-------|---------|-------|-------|---------|-----------------|--------------|
| 8054872 | -1,34 | -2,53 | 0,03139 | 0,89  | 1,86  | 0,06537 | NM_014553       | SLC11A1      |
| 8048283 | -1,34 | -2,53 | 0,00259 | -0,90 | -1,86 | 0,01065 | NM_000578       | ---          |
| 7963768 | -1,34 | -2,53 | 0,09625 | -0,92 | -1,89 | 0,13391 | ---             | FAM178B      |
| 8054020 | -1,34 | -2,53 | 0,02155 | -1,00 | -2,01 | 0,00697 | NM_001122646    | KATNAL2      |
| 8021131 | -1,34 | -2,53 | 0,00109 | -0,23 | -1,18 | 0,41133 | NM_031303       | C16orf5      |
| 7999160 | -1,34 | -2,53 | 0,09064 | -1,39 | -2,62 | 0,00181 | NM_013399       | CYP27B1      |
| 7964535 | -1,34 | -2,53 | 0,03675 | -0,09 | -1,06 | 0,75047 | NM_000785       | NCRNA00105   |
| 8176336 | -1,34 | -2,53 | 0,00681 | -1,25 | -2,38 | 0,00435 | NR_026711       | TRPT1        |
| 7949046 | -1,34 | -2,53 | 0,08049 | -0,27 | -1,20 | 0,63934 | NM_001033678    | MCCD1        |
| 8177964 | -1,34 | -2,53 | 0,14049 | -1,59 | -3,01 | 0,03237 | NM_001011700    | MCCD1        |
| 8179246 | -1,34 | -2,53 | 0,14049 | -1,59 | -3,01 | 0,03237 | NM_001011700    | TMEM231      |
| 8002897 | -1,34 | -2,53 | 0,08966 | -1,14 | -2,20 | 0,07165 | NM_001077419    | ZFPM1        |
| 7997767 | -1,34 | -2,53 | 0,02325 | -2,14 | -4,42 | 0,00038 | NM_153813       | LDHAL6A      |
| 7938800 | -1,34 | -2,53 | 0,00246 | -1,25 | -2,38 | 0,00409 | NM_144972       | HOXB8        |
| 8016473 | -1,34 | -2,53 | 0,00629 | -0,84 | -1,79 | 0,04862 | NM_024016       | ---          |
| 8081065 | -1,34 | -2,53 | 0,01106 | -0,63 | -1,55 | 0,01062 | ---             | SIGLEC12     |
| 8038852 | -1,34 | -2,53 | 0,00378 | -1,48 | -2,79 | 0,00003 | NM_053003       | BZRAP1       |
| 8016947 | -1,34 | -2,53 | 0,01319 | -1,69 | -3,22 | 0,00152 | NM_004758       | MOGAT1       |
| 8048725 | -1,34 | -2,53 | 0,05229 | -1,01 | -2,01 | 0,06305 | NM_058165       | LYPD5        |
| 8037422 | -1,34 | -2,53 | 0,08346 | -1,54 | -2,91 | 0,00646 | NM_001031749    | C19orf21     |
| 8024013 | -1,34 | -2,53 | 0,01313 | 1,23  | 2,35  | 0,05243 | BC052236        | KIR2DS4      |
| 8031358 | -1,34 | -2,53 | 0,10533 | -2,68 | -6,39 | 0,00022 | NM_012314       | LOC100130236 |
| 7919301 | -1,34 | -2,53 | 0,22235 | -2,84 | -7,14 | 0,00801 | AK128227        | GZMM         |
| 8023977 | -1,34 | -2,53 | 0,03668 | -1,96 | -3,90 | 0,03376 | NM_005317       | PIK3AP1      |
| 7935337 | -1,34 | -2,53 | 0,02867 | 0,23  | 1,17  | 0,03354 | NM_152309       | RIN1         |
| 7949592 | -1,34 | -2,53 | 0,00411 | -0,63 | -1,55 | 0,10000 | NM_004292       | ILDR1        |
| 8089970 | -1,34 | -2,53 | 0,02700 | -0,07 | -1,05 | 0,84259 | NM_175924       | ---          |
| 7922291 | -1,34 | -2,53 | 0,00016 | -1,13 | -2,19 | 0,05136 | ---             | PCDH20       |
| 7971905 | -1,34 | -2,53 | 0,05512 | -2,09 | -4,26 | 0,00020 | NM_022843       | KRTAP10-7    |
| 8069146 | -1,34 | -2,53 | 0,01667 | -1,61 | -3,04 | 0,08159 | NM_198689       | CDRT15       |
| 8012887 | -1,34 | -2,53 | 0,10855 | -0,66 | -1,58 | 0,01983 | NM_001007530    | ---          |
| 8013013 | -1,34 | -2,53 | 0,01782 | -1,35 | -2,55 | 0,03819 | ---             | ---          |
| 7908155 | -1,34 | -2,53 | 0,06611 | -2,89 | -7,41 | 0,00386 | ---             | GAD2         |
| 7926766 | -1,34 | -2,53 | 0,00921 | -1,51 | -2,86 | 0,02104 | NM_000818       | FLJ30679     |
| 7997731 | -1,34 | -2,53 | 0,05873 | -1,45 | -2,73 | 0,00698 | NR_026674       | C15orf37     |
| 7985253 | -1,34 | -2,53 | 0,00800 | -1,68 | -3,20 | 0,00168 | NR_028330       | CAPN10       |
| 8049702 | -1,34 | -2,53 | 0,00278 | -1,04 | -2,05 | 0,00730 | NM_023083       | SLC22A16     |
| 8128850 | -1,34 | -2,53 | 0,00304 | -1,30 | -2,45 | 0,00510 | NM_033125       | MAPT         |
| 8016263 | -1,34 | -2,53 | 0,00703 | -1,49 | -2,80 | 0,00458 | NM_016835       | LILRB4       |
| 8031238 | -1,34 | -2,53 | 0,02165 | -1,43 | -2,69 | 0,00237 | NM_006847       | DDX11        |
| 7954655 | -1,34 | -2,53 | 0,03280 | 0,11  | 1,08  | 0,81117 | NM_030653       | LIMS2        |
| 8055038 | -1,34 | -2,53 | 0,01253 | -1,93 | -3,80 | 0,00220 | NM_017980       | ---          |
| 7908839 | -1,34 | -2,53 | 0,03809 | -2,40 | -5,29 | 0,00045 | ---             | ADRA1D       |
| 8064779 | -1,34 | -2,53 | 0,04423 | -1,47 | -2,77 | 0,05830 | NM_000678       | CCDC51       |
| 8086949 | -1,34 | -2,53 | 0,00834 | -0,89 | -1,86 | 0,06691 | NM_024661       | CC2D2B       |
| 7929541 | -1,34 | -2,54 | 0,02236 | -0,28 | -1,22 | 0,04271 | NM_001159747    | ---          |
| 8147828 | -1,34 | -2,54 | 0,02526 | -1,32 | -2,50 | 0,05335 | ---             | NLRP9        |
| 8039533 | -1,34 | -2,54 | 0,10187 | -0,87 | -1,83 | 0,00783 | NM_176820       | ---          |
| 7904872 | -1,34 | -2,54 | 0,02099 | -1,15 | -2,22 | 0,00001 | ---             | ---          |
| 7904951 | -1,34 | -2,54 | 0,02099 | -1,15 | -2,22 | 0,00001 | ---             | HDGFL1       |
| 8117172 | -1,34 | -2,54 | 0,01022 | -1,82 | -3,53 | 0,00098 | NM_138574       | CRYBA1       |
| 8006019 | -1,34 | -2,54 | 0,00630 | -1,47 | -2,78 | 0,02593 | NM_005208       | IGK@         |
| 8043360 | -1,34 | -2,54 | 0,05969 | -1,35 | -2,55 | 0,02509 | BC030813        | ---          |
| 8128604 | -1,34 | -2,54 | 0,08315 | -1,15 | -2,21 | 0,01161 | ---             | PRRT1        |
| 8178754 | -1,34 | -2,54 | 0,01239 | -1,10 | -2,14 | 0,07047 | NM_030651       | PRRT1        |
| 8179950 | -1,34 | -2,54 | 0,01239 | -1,10 | -2,14 | 0,07047 | NM_030651       | ENPP6        |
| 8103894 | -1,34 | -2,54 | 0,01407 | -0,86 | -1,81 | 0,04829 | NM_153343       | ---          |
| 7927812 | -1,34 | -2,54 | 0,00927 | -1,59 | -3,01 | 0,01808 | ---             | C1QL1        |
| 8016155 | -1,34 | -2,54 | 0,09783 | -2,08 | -4,22 | 0,00253 | NM_006688       | MAFK         |
| 8131091 | -1,34 | -2,54 | 0,00077 | -0,20 | -1,15 | 0,62863 | NM_002360       | DPEP1        |
| 7997962 | -1,34 | -2,54 | 0,02659 | -1,19 | -2,28 | 0,00438 | NM_004413       | ---          |
| 8105739 | -1,34 | -2,54 | 0,03701 | -0,76 | -1,70 | 0,01878 | ---             | FLJ45684     |
| 8032070 | -1,34 | -2,54 | 0,09717 | -1,06 | -2,09 | 0,11326 | ENST00000358041 | CYP46A1      |
| 7976681 | -1,34 | -2,54 | 0,00870 | -0,87 | -1,83 | 0,00475 | NM_006668       | ---          |
| 7954434 | -1,34 | -2,54 | 0,00621 | -1,28 | -2,42 | 0,02584 | ---             | ---          |
| 8023862 | -1,35 | -2,54 | 0,02566 | -0,59 | -1,50 | 0,56708 | ---             | ---          |
| 8171800 | -1,35 | -2,54 | 0,04325 | -1,42 | -2,67 | 0,00215 | ---             | CABP2        |
| 7949843 | -1,35 | -2,54 | 0,02573 | -1,36 | -2,57 | 0,05799 | NM_016366       | IGFN1        |
| 7908650 | -1,35 | -2,54 | 0,00271 | -1,22 | -2,33 | 0,00274 | ENST00000412892 | ---          |
| 8133070 | -1,35 | -2,54 | 0,00014 | -1,22 | -2,34 | 0,00839 | ---             | ---          |
| 7901443 | -1,35 | -2,54 | 0,01800 | -1,54 | -2,91 | 0,02900 | ---             | ---          |
| 7911676 | -1,35 | -2,54 | 0,01932 | -1,33 | -2,52 | 0,07597 | ---             | BCL2L10      |
| 7988852 | -1,35 | -2,54 | 0,00926 | 0,48  | 1,39  | 0,37024 | NM_020396       | PRNT         |



|         |       |       |         |       |       |         |                 |           |
|---------|-------|-------|---------|-------|-------|---------|-----------------|-----------|
| 8064787 | -1,35 | -2,54 | 0,00074 | -1,39 | -2,62 | 0,00010 | ENST00000326539 | BOLL      |
| 8058075 | -1,35 | -2,54 | 0,00044 | -0,77 | -1,70 | 0,05440 | NM_033030       | PCYT1B    |
| 8171848 | -1,35 | -2,54 | 0,02277 | -1,67 | -3,17 | 0,00642 | NM_004845       | ---       |
| 7965108 | -1,35 | -2,54 | 0,02186 | -1,91 | -3,77 | 0,00054 | --- SLC25A33    | ---       |
| 7948088 | -1,35 | -2,54 | 0,00478 | 0,91  | 1,88  | 0,01255 | NM_032315       | GAST      |
| 8007148 | -1,35 | -2,54 | 0,00759 | -1,25 | -2,38 | 0,03010 | NM_000805       | NAT8B     |
| 8053030 | -1,35 | -2,54 | 0,06929 | -1,65 | -3,15 | 0,00670 | NM_016347       | ---       |
| 8142763 | -1,35 | -2,54 | 0,01837 | -1,96 | -3,89 | 0,05536 | --- COL7A1      | ---       |
| 8086985 | -1,35 | -2,54 | 0,00343 | -1,24 | -2,37 | 0,00232 | NM_000094       | TRIM43    |
| 8054041 | -1,35 | -2,54 | 0,10890 | -1,77 | -3,40 | 0,00308 | NM_138800       | TPH1      |
| 7946946 | -1,35 | -2,54 | 0,00745 | -1,01 | -2,01 | 0,03115 | NM_004179       | 02. Mrz   |
| 8025421 | -1,35 | -2,54 | 0,18644 | -0,02 | -1,01 | 0,97844 | NM_016496       | ---       |
| 8044733 | -1,35 | -2,54 | 0,04372 | -2,12 | -4,35 | 0,00026 | --- SNORD22     | ---       |
| 7948896 | -1,35 | -2,55 | 0,00263 | -1,88 | -3,67 | 0,01135 | NR_000008       | MAPK11    |
| 8076978 | -1,35 | -2,55 | 0,06014 | -1,15 | -2,22 | 0,05675 | NM_002751       | ---       |
| 8052370 | -1,35 | -2,55 | 0,03072 | -1,50 | -2,83 | 0,00108 | ---             | ---       |
| 8047125 | -1,35 | -2,55 | 0,01334 | -1,08 | -2,12 | 0,05972 | --- HAPLN2      | ---       |
| 7906197 | -1,35 | -2,55 | 0,02532 | -0,96 | -1,94 | 0,03750 | NM_021817       | SEZ6      |
| 8013833 | -1,35 | -2,55 | 0,08707 | -1,90 | -3,73 | 0,00010 | NM_178860       | ---       |
| 8062794 | -1,35 | -2,55 | 0,03853 | -1,20 | -2,30 | 0,01080 | --- SHOX        | ---       |
| 8165723 | -1,35 | -2,55 | 0,03236 | -1,68 | -3,20 | 0,00100 | NM_000451       | SHOX      |
| 8176297 | -1,35 | -2,55 | 0,03236 | -1,68 | -3,20 | 0,00100 | NM_000451       | CMPK2     |
| 8050102 | -1,35 | -2,55 | 0,00602 | -1,56 | -2,94 | 0,00389 | NM_207315       | C1orf186  |
| 7923875 | -1,35 | -2,55 | 0,01661 | -1,57 | -2,96 | 0,00318 | NM_001007544    | ---       |
| 8139678 | -1,35 | -2,55 | 0,06734 | -1,49 | -2,81 | 0,01879 | --- CA3         | ---       |
| 8147123 | -1,35 | -2,55 | 0,00152 | -1,37 | -2,59 | 0,00125 | NM_005181       | HGC6.3    |
| 8130824 | -1,35 | -2,55 | 0,12956 | -1,82 | -3,53 | 0,00241 | AB016902 RD3    | ---       |
| 7924085 | -1,35 | -2,55 | 0,01411 | -1,43 | -2,69 | 0,01681 | NM_183059       | ---       |
| 8105151 | -1,35 | -2,55 | 0,00936 | -0,65 | -1,57 | 0,27565 | ---             | ---       |
| 7920335 | -1,35 | -2,55 | 0,00899 | -1,40 | -2,64 | 0,00050 | --- DMRTC1      | ---       |
| 8168375 | -1,35 | -2,55 | 0,01070 | -1,15 | -2,22 | 0,01241 | NM_033053       | ---       |
| 8064216 | -1,35 | -2,55 | 0,02301 | -2,80 | -6,95 | 0,00954 | --- FKBP6       | ---       |
| 8133293 | -1,35 | -2,55 | 0,08502 | -2,13 | -4,37 | 0,00123 | NM_003602       | SHISA2    |
| 7970676 | -1,35 | -2,55 | 0,01191 | -1,30 | -2,47 | 0,03184 | NM_001007538    | LOC400968 |
| 7981750 | -1,35 | -2,55 | 0,28408 | -2,69 | -6,44 | 0,00017 | AK127783 RBMXL3 | ---       |
| 8169463 | -1,35 | -2,55 | 0,17947 | -0,68 | -1,60 | 0,27103 | NM_001145346    | OR10H5    |
| 8026488 | -1,35 | -2,55 | 0,10431 | -1,58 | -2,99 | 0,21191 | NM_001004466    | PRR25     |
| 7992121 | -1,35 | -2,55 | 0,08753 | -1,13 | -2,19 | 0,08532 | NM_001013638    | TMEM100   |
| 8016841 | -1,35 | -2,55 | 0,00280 | -0,96 | -1,94 | 0,01091 | NM_001099640    | SLC6A17   |
| 7903854 | -1,35 | -2,55 | 0,00571 | 0,68  | 1,60  | 0,05932 | NM_001010898    | SEPHS2    |
| 8000890 | -1,35 | -2,55 | 0,17121 | -0,80 | -1,74 | 0,40482 | NM_012248       | C22orf43  |
| 8074916 | -1,35 | -2,55 | 0,04747 | -1,37 | -2,58 | 0,08688 | NM_016449       | TMEM169   |
| 8048141 | -1,35 | -2,55 | 0,08840 | -1,00 | -2,00 | 0,02701 | NM_001142310    | TNFRSF18  |
| 7911403 | -1,35 | -2,55 | 0,04081 | -0,74 | -1,67 | 0,19874 | NM_004195       | SLC34A3   |
| 8159627 | -1,35 | -2,55 | 0,00947 | -1,55 | -2,92 | 0,06804 | NM_080877       | TMIGD2    |
| 8032782 | -1,35 | -2,55 | 0,02440 | -1,46 | -2,75 | 0,04122 | NM_144615       | ---       |
| 7943347 | -1,35 | -2,55 | 0,01742 | -1,29 | -2,45 | 0,00995 | --- MAGEA3      | ---       |
| 8175747 | -1,35 | -2,55 | 0,02317 | -1,14 | -2,21 | 0,00401 | NM_005362       | ---       |
| 8017363 | -1,35 | -2,55 | 0,06092 | -0,84 | -1,79 | 0,00849 | --- ZNF492      | ---       |
| 8027345 | -1,35 | -2,55 | 0,09184 | -1,06 | -2,08 | 0,06620 | NM_020855       | GLIS1     |
| 7916304 | -1,35 | -2,55 | 0,08695 | -2,06 | -4,18 | 0,00579 | NM_147193       | FAM159A   |
| 7901466 | -1,35 | -2,55 | 0,00708 | -1,21 | -2,32 | 0,00858 | NM_001042693    | ---       |
| 8172776 | -1,35 | -2,55 | 0,02730 | -2,43 | -5,40 | 0,00040 | --- IL34        | ---       |
| 7997128 | -1,35 | -2,55 | 0,01869 | -1,46 | -2,74 | 0,06028 | NM_152456       | ---       |
| 8150960 | -1,35 | -2,55 | 0,13676 | -2,11 | -4,31 | 0,00534 | --- RNF207      | ---       |
| 7897257 | -1,35 | -2,55 | 0,03442 | -1,45 | -2,72 | 0,03397 | NM_207396       | ---       |
| 7910585 | -1,35 | -2,55 | 0,10697 | -1,58 | -2,98 | 0,02525 | --- HOXD1       | ---       |
| 8046564 | -1,35 | -2,55 | 0,03253 | -1,35 | -2,56 | 0,00839 | NM_024501       | SPRR1B    |
| 7905553 | -1,35 | -2,56 | 0,06622 | -1,95 | -3,87 | 0,00595 | NM_003125       | ---       |
| 8112881 | -1,35 | -2,56 | 0,07657 | -1,26 | -2,39 | 0,00504 | --- MUC2        | ---       |
| 7937560 | -1,35 | -2,56 | 0,00884 | -1,24 | -2,36 | 0,00641 | NM_002457       | ASPSCR1   |
| 8010702 | -1,35 | -2,56 | 0,03346 | -0,48 | -1,40 | 0,10484 | NM_024083       | ---       |
| 7959482 | -1,35 | -2,56 | 0,14361 | -1,75 | -3,35 | 0,07130 | --- HGFAC       | ---       |
| 8093792 | -1,35 | -2,56 | 0,02162 | -1,23 | -2,35 | 0,00253 | NM_001528       | ---       |
| 8064430 | -1,35 | -2,56 | 0,16624 | -1,07 | -2,10 | 0,04909 | --- CALHM1      | ---       |
| 7936108 | -1,35 | -2,56 | 0,00051 | -1,02 | -2,02 | 0,02543 | NM_001001412    | ERAS      |
| 8167407 | -1,35 | -2,56 | 0,05609 | -0,99 | -1,98 | 0,00739 | NM_181532       | ---       |
| 8005697 | -1,35 | -2,56 | 0,01432 | -1,46 | -2,75 | 0,06209 | --- CDH12       | ---       |
| 8111234 | -1,35 | -2,56 | 0,01613 | -1,04 | -2,06 | 0,01172 | NM_004061       | BCAS4     |
| 8063417 | -1,35 | -2,56 | 0,01511 | -1,43 | -2,70 | 0,01014 | NM_017843       | JPH2      |
| 8066393 | -1,35 | -2,56 | 0,00210 | -0,99 | -1,98 | 0,03243 | NM_020433       | TP53TG3   |
| 7995282 | -1,35 | -2,56 | 0,21384 | -2,17 | -4,49 | 0,00552 | NM_016212       | TP53TG3   |
| 8001072 | -1,35 | -2,56 | 0,21384 | -2,17 | -4,49 | 0,00552 | NM_016212       | MIR125A   |

|         |       |       |         |       |        |         |                 |           |
|---------|-------|-------|---------|-------|--------|---------|-----------------|-----------|
| 8030846 | -1,36 | -2,56 | 0,02120 | -0,74 | -1,67  | 0,05393 | NR_029693       | DEFA5     |
| 8149142 | -1,36 | -2,56 | 0,00590 | -1,55 | -2,92  | 0,01992 | NM_021010       | ---       |
| 8017251 | -1,36 | -2,56 | 0,05913 | -1,68 | -3,19  | 0,02139 | ---             | GYLTL1B   |
| 7939620 | -1,36 | -2,56 | 0,03803 | 3,25  | 9,49   | 0,00151 | NM_152312       | ---       |
| 7917974 | -1,36 | -2,56 | 0,01728 | -0,70 | -1,63  | 0,01577 | ---             | ---       |
| 8095214 | -1,36 | -2,56 | 0,15856 | -5,11 | -34,63 | 0,00036 | ---             | RHOXF2    |
| 8169676 | -1,36 | -2,56 | 0,00114 | -1,33 | -2,51  | 0,01509 | NM_032498       | RHOXF2    |
| 8174750 | -1,36 | -2,56 | 0,00114 | -1,33 | -2,51  | 0,01509 | NM_032498       | ---       |
| 8075481 | -1,36 | -2,56 | 0,03243 | -1,07 | -2,11  | 0,00573 | ---             | MFAP3L    |
| 8103695 | -1,36 | -2,56 | 0,01023 | -0,49 | -1,41  | 0,11586 | NM_021647       | ---       |
| 8118818 | -1,36 | -2,56 | 0,04218 | -2,30 | -4,91  | 0,00031 | ---             | C20orf160 |
| 8061653 | -1,36 | -2,56 | 0,00056 | -1,08 | -2,11  | 0,00096 | NM_080625       | PDCD1     |
| 8060294 | -1,36 | -2,56 | 0,05833 | -1,23 | -2,35  | 0,00465 | NM_005018       | ---       |
| 8171334 | -1,36 | -2,56 | 0,01079 | -1,39 | -2,63  | 0,00028 | ---             | ---       |
| 8172395 | -1,36 | -2,56 | 0,01043 | -1,06 | -2,09  | 0,00450 | ---             | ---       |
| 8057576 | -1,36 | -2,56 | 0,01484 | -1,95 | -3,87  | 0,00055 | ---             | USF2      |
| 8027805 | -1,36 | -2,56 | 0,00433 | -0,71 | -1,63  | 0,09692 | NM_003367       | FZD2      |
| 8007637 | -1,36 | -2,56 | 0,06644 | -1,07 | -2,11  | 0,01033 | NM_001466       | ZNF417    |
| 8039695 | -1,36 | -2,56 | 0,09434 | -1,65 | -3,13  | 0,00906 | NM_152475       | CLDN14    |
| 8070233 | -1,36 | -2,56 | 0,01969 | -0,06 | -1,04  | 0,78947 | NM_144492       | ---       |
| 8134374 | -1,36 | -2,56 | 0,05393 | -0,94 | -1,92  | 0,12250 | ---             | FGF19     |
| 7950023 | -1,36 | -2,56 | 0,00510 | -1,25 | -2,38  | 0,02649 | NM_005117       | KLF1      |
| 8034578 | -1,36 | -2,56 | 0,00979 | -1,56 | -2,95  | 0,00277 | NM_006563       | ---       |
| 8051370 | -1,36 | -2,56 | 0,01830 | -1,04 | -2,06  | 0,00916 | ---             | PSKH2     |
| 8151633 | -1,36 | -2,56 | 0,02192 | -0,70 | -1,63  | 0,00555 | NM_033126       | CHST7     |
| 8166999 | -1,36 | -2,56 | 0,02163 | -1,16 | -2,23  | 0,08316 | NM_019886       | ---       |
| 8070231 | -1,36 | -2,56 | 0,00916 | -0,67 | -1,59  | 0,06854 | ---             | PATL2     |
| 7988327 | -1,36 | -2,56 | 0,03058 | -2,07 | -4,21  | 0,00212 | NM_001145112    | EPHB6     |
| 8136811 | -1,36 | -2,56 | 0,01268 | -1,41 | -2,65  | 0,01239 | NM_004445       | ---       |
| 7965679 | -1,36 | -2,56 | 0,04522 | -0,95 | -1,93  | 0,07297 | ---             | VTRNA1-1  |
| 8108627 | -1,36 | -2,56 | 0,01644 | -1,51 | -2,86  | 0,04290 | NR_026703       | ---       |
| 8013259 | -1,36 | -2,56 | 0,04795 | -1,51 | -2,85  | 0,02253 | ---             | PAOX      |
| 7931582 | -1,36 | -2,56 | 0,00288 | -1,31 | -2,48  | 0,00303 | NM_152911       | TMEM196   |
| 8138459 | -1,36 | -2,56 | 0,06216 | -1,21 | -2,31  | 0,04704 | NM_152774       | C7orf66   |
| 8142329 | -1,36 | -2,56 | 0,04753 | -1,50 | -2,82  | 0,00008 | NM_001024607    | LOC388796 |
| 8066254 | -1,36 | -2,56 | 0,26122 | -1,80 | -3,48  | 0,00894 | BC012894        | MAML1     |
| 8110546 | -1,36 | -2,57 | 0,00924 | -1,00 | -2,00  | 0,00841 | NM_014757       | B3GAT1    |
| 7952884 | -1,36 | -2,57 | 0,13727 | -2,04 | -4,12  | 0,00364 | NM_054025       | MMP17     |
| 7959946 | -1,36 | -2,57 | 0,00015 | -0,02 | -1,02  | 0,96417 | NM_016155       | GCKR      |
| 8040960 | -1,36 | -2,57 | 0,00373 | -1,31 | -2,48  | 0,01610 | NM_001486       | NEDD9     |
| 8123936 | -1,36 | -2,57 | 0,02320 | -0,61 | -1,53  | 0,13526 | NM_001142393    | ---       |
| 8066818 | -1,36 | -2,57 | 0,09640 | -1,41 | -2,66  | 0,04298 | ---             | ---       |
| 8107644 | -1,36 | -2,57 | 0,01698 | -1,68 | -3,20  | 0,00920 | ---             | C3orf62   |
| 8079744 | -1,36 | -2,57 | 0,00070 | -1,78 | -3,44  | 0,00037 | NM_198562       | DOC2A     |
| 8000757 | -1,36 | -2,57 | 0,02943 | 0,61  | 1,53   | 0,23859 | NM_003586       | MIR99A    |
| 8067942 | -1,36 | -2,57 | 0,01768 | -0,84 | -1,78  | 0,05335 | NR_029514       | SRCRB4D   |
| 8140403 | -1,36 | -2,57 | 0,00611 | -1,22 | -2,33  | 0,00194 | NM_080744       | C21orf32  |
| 8070716 | -1,36 | -2,57 | 0,11699 | -1,63 | -3,11  | 0,06565 | ENST00000430662 | EPO       |
| 8134907 | -1,36 | -2,57 | 0,06433 | -1,99 | -3,97  | 0,00030 | NM_000799       | FLJ43763  |
| 8116545 | -1,36 | -2,57 | 0,00113 | -1,34 | -2,53  | 0,07152 | ENST00000381078 | TSPY1     |
| 8176532 | -1,36 | -2,57 | 0,04601 | -1,42 | -2,68  | 0,00020 | NM_003308       | IL9R      |
| 8171052 | -1,36 | -2,57 | 0,05222 | -2,13 | -4,37  | 0,00015 | NR_024033       | IL9R      |
| 8176972 | -1,36 | -2,57 | 0,05222 | -2,13 | -4,37  | 0,00015 | NR_024033       | RCOR2     |
| 7949021 | -1,36 | -2,57 | 0,03837 | -1,33 | -2,52  | 0,00075 | NM_173587       | RASD1     |
| 8013112 | -1,36 | -2,57 | 0,01563 | 1,02  | 2,03   | 0,11993 | NM_016084       | TTBK1     |
| 8119765 | -1,36 | -2,57 | 0,08467 | -1,45 | -2,73  | 0,00525 | NM_032538       | ---       |
| 8100521 | -1,36 | -2,57 | 0,02047 | -1,36 | -2,56  | 0,01088 | ---             | ---       |
| 8171531 | -1,36 | -2,57 | 0,09329 | -0,76 | -1,70  | 0,03543 | ---             | AGTR2     |
| 8169492 | -1,36 | -2,57 | 0,08232 | -1,25 | -2,38  | 0,01287 | NM_000686       | SPRR4     |
| 7905536 | -1,36 | -2,57 | 0,07575 | -2,59 | -6,04  | 0,00034 | NM_173080       | ZNF837    |
| 8039766 | -1,36 | -2,57 | 0,06011 | -1,58 | -2,99  | 0,08125 | NM_001129730    | SIVA1     |
| 7977288 | -1,36 | -2,57 | 0,00138 | 0,70  | 1,62   | 0,34688 | NM_006427       | ---       |
| 8066273 | -1,36 | -2,57 | 0,06951 | -0,68 | -1,60  | 0,00722 | ---             | C20orf181 |
| 8067754 | -1,36 | -2,57 | 0,04093 | -1,45 | -2,74  | 0,00029 | U63828          | FOX11     |
| 8109901 | -1,36 | -2,57 | 0,05224 | -1,52 | -2,87  | 0,00650 | NM_012188       | ARSH      |
| 8165833 | -1,36 | -2,57 | 0,04033 | -1,29 | -2,44  | 0,00471 | NM_001011719    | ---       |
| 8067965 | -1,36 | -2,57 | 0,07006 | -1,27 | -2,42  | 0,04502 | ---             | TEX13B    |
| 8174375 | -1,36 | -2,57 | 0,01559 | -1,42 | -2,68  | 0,01295 | NM_031273       | GSC       |
| 7981106 | -1,36 | -2,57 | 0,01379 | -1,95 | -3,87  | 0,00101 | NM_173849       | ---       |
| 7989883 | -1,36 | -2,57 | 0,00058 | -1,27 | -2,41  | 0,00101 | ---             | AGBL4     |
| 7915971 | -1,36 | -2,57 | 0,00338 | -2,15 | -4,45  | 0,00258 | NM_032785       | FOLR4     |
| 7943226 | -1,36 | -2,58 | 0,00983 | -2,98 | -7,88  | 0,00023 | NM_001080486    | B4GALNT2  |
| 8008172 | -1,36 | -2,58 | 0,00133 | 0,87  | 1,83   | 0,00725 | NM_153446       | RP9       |

|         |       |       |         |       |       |         |                 |              |
|---------|-------|-------|---------|-------|-------|---------|-----------------|--------------|
| 8138950 | -1,37 | -2,58 | 0,05190 | 0,36  | 1,29  | 0,26972 | NM_203288       | FCN2         |
| 8159211 | -1,37 | -2,58 | 0,17303 | -1,13 | -2,20 | 0,08819 | NM_004108       | ---          |
| 7935144 | -1,37 | -2,58 | 0,00036 | -1,01 | -2,01 | 0,00069 | ---             | PVRIG        |
| 8134777 | -1,37 | -2,58 | 0,02262 | -1,80 | -3,49 | 0,00395 | NM_024070       | ---          |
| 8071375 | -1,37 | -2,58 | 0,12616 | -2,36 | -5,14 | 0,00621 | ---             | OR4N5        |
| 7973026 | -1,37 | -2,58 | 0,10059 | -2,48 | -5,57 | 0,00007 | NM_001004724    | LRRFIP1      |
| 8049530 | -1,37 | -2,58 | 0,03958 | -1,57 | -2,97 | 0,09702 | NM_001137550    | PROK2        |
| 8088813 | -1,37 | -2,58 | 0,00235 | -0,45 | -1,37 | 0,03440 | NM_001126128    | ACOT4        |
| 7975607 | -1,37 | -2,58 | 0,08158 | 1,29  | 2,45  | 0,00219 | NM_152331       | HPX          |
| 7946167 | -1,37 | -2,58 | 0,01341 | -1,25 | -2,38 | 0,00408 | NM_000613       | ---          |
| 8018295 | -1,37 | -2,58 | 0,02677 | -1,25 | -2,37 | 0,08092 | ---             | ARC          |
| 8153322 | -1,37 | -2,58 | 0,06002 | -1,49 | -2,81 | 0,00148 | NM_015193       | ZBBX         |
| 8091887 | -1,37 | -2,58 | 0,00355 | -0,78 | -1,72 | 0,00650 | NM_024687       | DVL1         |
| 7911506 | -1,37 | -2,58 | 0,00656 | -0,44 | -1,36 | 0,44309 | NM_004421       | C6orf208     |
| 8123488 | -1,37 | -2,58 | 0,01962 | -1,22 | -2,33 | 0,00476 | NR_026780       | ---          |
| 8127664 | -1,37 | -2,58 | 0,05136 | -1,46 | -2,76 | 0,00631 | ---             | CCDC70       |
| 7969222 | -1,37 | -2,58 | 0,08930 | -1,12 | -2,18 | 0,04393 | NM_031290       | MMD2         |
| 8137931 | -1,37 | -2,58 | 0,05922 | -1,53 | -2,88 | 0,00659 | NM_001100600    | PQLC2        |
| 7898556 | -1,37 | -2,58 | 0,01328 | -0,14 | -1,10 | 0,70384 | NM_001040125    | ---          |
| 8161644 | -1,37 | -2,58 | 0,01183 | -0,90 | -1,86 | 0,00541 | ---             | PRR23C       |
| 8091043 | -1,37 | -2,58 | 0,01285 | -1,68 | -3,21 | 0,01158 | NM_001134657    | SALL4        |
| 8067087 | -1,37 | -2,58 | 0,00093 | 0,72  | 1,64  | 0,02385 | NM_020436       | LOC389102    |
| 8086024 | -1,37 | -2,58 | 0,01141 | -2,10 | -4,30 | 0,00034 | AY358209        | FAM38A       |
| 7997829 | -1,37 | -2,58 | 0,00740 | -1,16 | -2,23 | 0,04763 | NM_001142864    | HAUS5        |
| 8027886 | -1,37 | -2,58 | 0,00212 | -0,77 | -1,70 | 0,02393 | NM_015302       | HPS6         |
| 7929988 | -1,37 | -2,58 | 0,02608 | 1,56  | 2,95  | 0,05401 | NM_024747       | GPR143       |
| 8171284 | -1,37 | -2,58 | 0,04720 | -0,41 | -1,33 | 0,14057 | NM_000273       | FLJ22184     |
| 8033455 | -1,37 | -2,58 | 0,05314 | -0,68 | -1,60 | 0,05051 | ENST00000327607 | C12orf12     |
| 7965384 | -1,37 | -2,58 | 0,05651 | -1,86 | -3,62 | 0,00917 | BC027600        | CENPM        |
| 8076393 | -1,37 | -2,58 | 0,00858 | -0,82 | -1,76 | 0,13821 | NM_024053       | FAM153B      |
| 8110123 | -1,37 | -2,58 | 0,03106 | -0,70 | -1,63 | 0,08773 | NM_001079529    | LRRRC4C      |
| 7947553 | -1,37 | -2,58 | 0,00212 | -1,64 | -3,11 | 0,05083 | NM_020929       | C13orf28     |
| 7970150 | -1,37 | -2,59 | 0,00975 | -1,28 | -2,43 | 0,02955 | NM_145248       | ---          |
| 8139767 | -1,37 | -2,59 | 0,15160 | -2,35 | -5,09 | 0,00001 | ---             | NR5A2        |
| 7908597 | -1,37 | -2,59 | 0,08267 | 3,03  | 8,15  | 0,00434 | NM_205860       | ---          |
| 7922456 | -1,37 | -2,59 | 0,02677 | -2,21 | -4,64 | 0,00949 | ---             | TEX19        |
| 8010780 | -1,37 | -2,59 | 0,01099 | -1,05 | -2,06 | 0,01852 | NM_207459       | ---          |
| 8166438 | -1,37 | -2,59 | 0,00277 | -1,63 | -3,10 | 0,00682 | ---             | OR2AE1       |
| 8141361 | -1,37 | -2,59 | 0,05464 | -1,06 | -2,09 | 0,03614 | NM_001005276    | UTS2R        |
| 8010783 | -1,37 | -2,59 | 0,16380 | -0,99 | -1,99 | 0,08921 | NM_018949       | SCARNA9      |
| 7943158 | -1,37 | -2,59 | 0,14265 | -0,97 | -1,96 | 0,07591 | NR_002569       | CRB3         |
| 8025041 | -1,37 | -2,59 | 0,11828 | -1,74 | -3,34 | 0,00108 | NM_139161       | C9orf71      |
| 8161610 | -1,37 | -2,59 | 0,02080 | -0,83 | -1,78 | 0,05175 | NM_153237       | LCE4A        |
| 7905510 | -1,37 | -2,59 | 0,03960 | -2,21 | -4,63 | 0,00016 | NM_178356       | PLLP         |
| 8001547 | -1,37 | -2,59 | 0,00879 | 2,95  | 7,74  | 0,00598 | NM_015993       | ---          |
| 7993179 | -1,37 | -2,59 | 0,00722 | -0,84 | -1,78 | 0,00215 | ---             | CELSR1       |
| 8076757 | -1,37 | -2,59 | 0,02400 | 1,59  | 3,01  | 0,07367 | NM_014246       | FEM1A        |
| 8024898 | -1,37 | -2,59 | 0,03870 | 0,23  | 1,17  | 0,50524 | NM_018708       | FAM138B      |
| 8044643 | -1,37 | -2,59 | 0,19588 | -2,09 | -4,27 | 0,01226 | NR_026821       | BPIL3        |
| 8061799 | -1,37 | -2,59 | 0,03965 | -1,07 | -2,09 | 0,00014 | NM_174897       | ZBTB48       |
| 7897305 | -1,37 | -2,59 | 0,01402 | -1,22 | -2,33 | 0,01394 | NM_005341       | ---          |
| 7901357 | -1,37 | -2,59 | 0,08205 | -1,55 | -2,92 | 0,08270 | ---             | MAGEC3       |
| 8170260 | -1,37 | -2,59 | 0,09797 | -1,42 | -2,68 | 0,00007 | NM_138702       | OR5D16       |
| 7939950 | -1,37 | -2,59 | 0,14528 | -1,51 | -2,85 | 0,00881 | NM_001005496    | SH2B2        |
| 8135149 | -1,37 | -2,59 | 0,01204 | -1,27 | -2,41 | 0,00117 | NM_020979       | SMPX         |
| 8171791 | -1,37 | -2,59 | 0,01393 | -0,74 | -1,67 | 0,07582 | NM_014332       | C1orf170     |
| 7911371 | -1,37 | -2,59 | 0,02538 | -1,82 | -3,53 | 0,00006 | NR_027693       | ---          |
| 8170013 | -1,37 | -2,59 | 0,13602 | -2,48 | -5,58 | 0,13456 | ---             | ---          |
| 8175317 | -1,37 | -2,59 | 0,13602 | -2,48 | -5,58 | 0,13456 | ---             | GABRD        |
| 7897034 | -1,37 | -2,59 | 0,01325 | 0,19  | 1,14  | 0,45688 | NM_000815       | ---          |
| 8032922 | -1,37 | -2,59 | 0,00089 | -0,68 | -1,61 | 0,22830 | ---             | CASP14       |
| 8026398 | -1,37 | -2,59 | 0,01510 | -1,85 | -3,61 | 0,00514 | NM_012114       | ---          |
| 7929256 | -1,37 | -2,59 | 0,17082 | -1,27 | -2,42 | 0,00105 | ---             | LOC100131131 |
| 8043993 | -1,37 | -2,59 | 0,00497 | -1,00 | -2,01 | 0,00047 | AY358263        | FLJ26056     |
| 8074309 | -1,37 | -2,59 | 0,14076 | -2,39 | -5,24 | 0,00175 | ENST00000342888 | SNORA70D     |
| 8002590 | -1,37 | -2,59 | 0,00666 | -1,38 | -2,61 | 0,02687 | NR_033337       | HCK          |
| 8061668 | -1,37 | -2,59 | 0,00079 | -1,27 | -2,42 | 0,02786 | NM_001172129    | H2AFJ        |
| 7954124 | -1,38 | -2,59 | 0,03080 | -1,10 | -2,15 | 0,07648 | NM_177925       | FIZ1         |
| 8039526 | -1,38 | -2,59 | 0,08112 | -0,76 | -1,69 | 0,18683 | NM_032836       | C3orf70      |
| 8092520 | -1,38 | -2,59 | 0,01346 | -2,24 | -4,71 | 0,00084 | BC137178        | GHSR         |
| 8092165 | -1,38 | -2,59 | 0,29497 | -3,26 | -9,58 | 0,00102 | NM_198407       | ---          |
| 7962343 | -1,38 | -2,59 | 0,00216 | -1,29 | -2,45 | 0,00113 | ---             | TPSAB1       |
| 7998434 | -1,38 | -2,60 | 0,04880 | -2,50 | -5,65 | 0,00013 | NM_003294       | C19orf51     |

|         |       |       |         |       |       |         |                 |           |
|---------|-------|-------|---------|-------|-------|---------|-----------------|-----------|
| 8039362 | -1,38 | -2,60 | 0,04193 | -1,03 | -2,04 | 0,01517 | NM_178837       | HRNR      |
| 7920155 | -1,38 | -2,60 | 0,00435 | -1,32 | -2,50 | 0,02926 | NM_001009931    | GPR109B   |
| 7967322 | -1,38 | -2,60 | 0,04134 | -0,93 | -1,90 | 0,09373 | NM_006018       | GDF3      |
| 7960828 | -1,38 | -2,60 | 0,03108 | -2,32 | -5,00 | 0,00048 | NM_020634       | SLA       |
| 8152988 | -1,38 | -2,60 | 0,00211 | -1,76 | -3,39 | 0,00438 | NM_001045556    | TMEM150B  |
| 8039453 | -1,38 | -2,60 | 0,06398 | -1,35 | -2,55 | 0,00143 | NM_001085488    | ZBTB32    |
| 8027947 | -1,38 | -2,60 | 0,02285 | -1,48 | -2,78 | 0,00233 | NM_014383       | TP53TG3   |
| 7995267 | -1,38 | -2,60 | 0,18382 | -2,50 | -5,65 | 0,00584 | NM_016212       | ---       |
| 8165858 | -1,38 | -2,60 | 0,03973 | -0,52 | -1,44 | 0,07226 | ---             | SLC6A19   |
| 8104268 | -1,38 | -2,60 | 0,02117 | -0,98 | -1,98 | 0,10112 | NM_001003841    | NRSN1     |
| 8117178 | -1,38 | -2,60 | 0,13104 | -1,70 | -3,26 | 0,00112 | NM_080723       | ADAP1     |
| 8137680 | -1,38 | -2,60 | 0,00283 | -0,81 | -1,75 | 0,12952 | NM_006869       | CUX2      |
| 7958726 | -1,38 | -2,60 | 0,00256 | -1,65 | -3,14 | 0,00829 | NM_015267       | FIGLA     |
| 8052902 | -1,38 | -2,60 | 0,00018 | -1,23 | -2,35 | 0,00386 | NM_001004311    | PRHOXNB   |
| 7970732 | -1,38 | -2,60 | 0,00002 | -1,93 | -3,80 | 0,00071 | NM_001105577    | ---       |
| 7935778 | -1,38 | -2,60 | 0,00208 | -1,47 | -2,78 | 0,00022 | ---             | FLJ41733  |
| 8068891 | -1,38 | -2,60 | 0,06748 | -0,65 | -1,57 | 0,09021 | AK123727        | GPR182    |
| 7956281 | -1,38 | -2,60 | 0,08845 | -1,95 | -3,86 | 0,00517 | NM_007264       | NRTN      |
| 8024995 | -1,38 | -2,60 | 0,05898 | -0,88 | -1,84 | 0,02220 | NM_004558       | OR10H1    |
| 8035078 | -1,38 | -2,60 | 0,22924 | -1,83 | -3,55 | 0,00288 | NM_013940       | ---       |
| 8096536 | -1,38 | -2,60 | 0,13282 | -1,57 | -2,97 | 0,12198 | ---             | OR2S2     |
| 8161166 | -1,38 | -2,60 | 0,06376 | -2,70 | -6,48 | 0,00003 | NM_019897       | TYW1B     |
| 8139935 | -1,38 | -2,60 | 0,09138 | 0,92  | 1,90  | 0,06637 | NM_001145440    | FAM90A13  |
| 8144428 | -1,38 | -2,60 | 0,27915 | -2,42 | -5,37 | 0,00561 | NM_001164456    | FAM90A13  |
| 8144432 | -1,38 | -2,60 | 0,27915 | -2,42 | -5,37 | 0,00561 | NM_001164456    | FAM90A13  |
| 8144436 | -1,38 | -2,60 | 0,27915 | -2,42 | -5,37 | 0,00561 | NM_001164456    | FAM90A13  |
| 8144444 | -1,38 | -2,60 | 0,27915 | -2,42 | -5,37 | 0,00561 | NM_001164456    | ---       |
| 8120822 | -1,38 | -2,60 | 0,01415 | -0,83 | -1,77 | 0,01381 | ---             | H1FX      |
| 8090555 | -1,38 | -2,60 | 0,03647 | -0,90 | -1,86 | 0,12147 | NM_006026       | ---       |
| 7904480 | -1,38 | -2,60 | 0,00369 | -1,26 | -2,40 | 0,02738 | ---             | ---       |
| 7904963 | -1,38 | -2,60 | 0,00369 | -1,26 | -2,40 | 0,02738 | ---             | TMPRSS11E |
| 8095380 | -1,38 | -2,60 | 0,00378 | -1,96 | -3,90 | 0,00006 | NM_014058       | ---       |
| 8124164 | -1,38 | -2,60 | 0,02248 | -1,17 | -2,25 | 0,00865 | ---             | SCARA5    |
| 8149966 | -1,38 | -2,61 | 0,01503 | -0,87 | -1,82 | 0,00658 | NM_173833       | ATG9B     |
| 8143803 | -1,38 | -2,61 | 0,00470 | -1,68 | -3,20 | 0,00415 | NM_173681       | ---       |
| 8095564 | -1,38 | -2,61 | 0,04520 | -0,72 | -1,65 | 0,00336 | ---             | MBLAC1    |
| 8134737 | -1,38 | -2,61 | 0,06812 | -1,58 | -2,99 | 0,00456 | NM_203397       | ---       |
| 7954277 | -1,38 | -2,61 | 0,02600 | -0,82 | -1,77 | 0,20673 | ---             | LIM2      |
| 8038815 | -1,38 | -2,61 | 0,01063 | -1,18 | -2,27 | 0,00941 | NM_030657       | CYP2G1P   |
| 8028950 | -1,38 | -2,61 | 0,05098 | -1,29 | -2,44 | 0,08103 | ENST00000252909 | ST14      |
| 7945204 | -1,38 | -2,61 | 0,00861 | 2,94  | 7,67  | 0,00270 | NM_021978       | GEMIN8P4  |
| 7917593 | -1,38 | -2,61 | 0,06050 | -0,97 | -1,95 | 0,19878 | NR_002830       | HSD11B2   |
| 7996563 | -1,38 | -2,61 | 0,00157 | -0,86 | -1,81 | 0,03147 | NM_000196       | ---       |
| 7914230 | -1,38 | -2,61 | 0,02085 | -2,12 | -4,35 | 0,00083 | ---             | FAM46B    |
| 7914015 | -1,38 | -2,61 | 0,01980 | -0,69 | -1,61 | 0,23375 | NM_052943       | CPLX2     |
| 8110114 | -1,38 | -2,61 | 0,00206 | -1,60 | -3,04 | 0,00058 | NM_006650       | FAM195B   |
| 8019754 | -1,38 | -2,61 | 0,00104 | -0,75 | -1,68 | 0,07918 | NM_207368       | NAT14     |
| 8031495 | -1,38 | -2,61 | 0,10561 | -0,63 | -1,55 | 0,10782 | NM_020378       | TMC8      |
| 8010212 | -1,38 | -2,61 | 0,00894 | -0,88 | -1,84 | 0,00424 | NM_152468       | AANAT     |
| 8010071 | -1,38 | -2,61 | 0,09731 | -0,85 | -1,80 | 0,00071 | NM_001088       | ---       |
| 7976187 | -1,38 | -2,61 | 0,00365 | -2,35 | -5,11 | 0,00273 | ---             | KLF2      |
| 8026564 | -1,38 | -2,61 | 0,03100 | -1,68 | -3,21 | 0,02310 | NM_016270       | DACT3     |
| 8037788 | -1,38 | -2,61 | 0,03122 | -2,03 | -4,10 | 0,00069 | NM_145056       | FGF23     |
| 7960397 | -1,38 | -2,61 | 0,02048 | -1,51 | -2,85 | 0,00009 | NM_020638       | SNORA51   |
| 8060501 | -1,38 | -2,61 | 0,03305 | -1,73 | -3,32 | 0,02083 | NR_002981       | ---       |
| 8072187 | -1,38 | -2,61 | 0,00190 | -1,41 | -2,66 | 0,00383 | ---             | ATP1B2    |
| 8004545 | -1,38 | -2,61 | 0,02251 | 0,80  | 1,74  | 0,04780 | NM_001678       | ---       |
| 8045583 | -1,38 | -2,61 | 0,04297 | -1,07 | -2,10 | 0,02815 | ---             | CSH1      |
| 8017488 | -1,38 | -2,61 | 0,04834 | -2,25 | -4,75 | 0,00013 | NM_022640       | CCR2      |
| 8093294 | -1,39 | -2,61 | 0,00820 | -2,18 | -4,54 | 0,00112 | NM_001123041    | ZNF784    |
| 8039530 | -1,39 | -2,61 | 0,01499 | -1,33 | -2,51 | 0,02026 | NM_203374       | DHDPSL    |
| 7929664 | -1,39 | -2,61 | 0,01972 | -1,43 | -2,70 | 0,02350 | NM_138413       | TNAP      |
| 7971159 | -1,39 | -2,61 | 0,13586 | -1,34 | -2,54 | 0,04170 | AF463496        | SLCO4C1   |
| 8107129 | -1,39 | -2,61 | 0,05685 | -1,22 | -2,34 | 0,00839 | NM_180991       | ---       |
| 8016283 | -1,39 | -2,61 | 0,33411 | -1,11 | -2,16 | 0,15430 | ---             | C9orf169  |
| 8159624 | -1,39 | -2,61 | 0,02531 | -1,53 | -2,88 | 0,00358 | NM_199001       | ---       |
| 7910490 | -1,39 | -2,61 | 0,00252 | -0,71 | -1,64 | 0,01696 | ---             | ---       |
| 8111415 | -1,39 | -2,61 | 0,12043 | -0,59 | -1,50 | 0,03563 | ---             | XKR4      |
| 8146475 | -1,39 | -2,61 | 0,02091 | -1,39 | -2,62 | 0,02735 | NM_052898       | TM7SF2    |
| 7941148 | -1,39 | -2,61 | 0,00532 | -0,32 | -1,25 | 0,59228 | NM_003273       | OPN1MW    |
| 8170816 | -1,39 | -2,61 | 0,01216 | -1,43 | -2,70 | 0,00574 | NM_000513       | ---       |
| 8053560 | -1,39 | -2,61 | 0,08060 | -1,49 | -2,81 | 0,00117 | ---             | SLC18A1   |
| 8149592 | -1,39 | -2,62 | 0,00505 | -1,91 | -3,75 | 0,00040 | NM_001135691    | CCDC154   |

|         |       |       |         |       |       |         |                    |               |
|---------|-------|-------|---------|-------|-------|---------|--------------------|---------------|
| 7998494 | -1,39 | -2,62 | 0,03135 | -0,94 | -1,92 | 0,15692 | NM_001143980       | PAQR9         |
| 8091255 | -1,39 | -2,62 | 0,06136 | -2,07 | -4,19 | 0,00348 | NM_198504          | C22orf34      |
| 8076826 | -1,39 | -2,62 | 0,01296 | -1,15 | -2,22 | 0,15861 | NR_026997          | ---           |
| 8091712 | -1,39 | -2,62 | 0,00069 | -1,65 | -3,14 | 0,00432 | --- KCNC3          | ---           |
| 8038540 | -1,39 | -2,62 | 0,02562 | -0,90 | -1,87 | 0,26483 | NM_004977          | FUT4          |
| 7943236 | -1,39 | -2,62 | 0,03916 | -0,38 | -1,31 | 0,40150 | NM_002033          | LPAR2         |
| 8035703 | -1,39 | -2,62 | 0,02779 | 0,53  | 1,45  | 0,26072 | NM_004720          | SLC16A8       |
| 8076002 | -1,39 | -2,62 | 0,01107 | -1,29 | -2,45 | 0,07333 | NM_013356          | HDAC10        |
| 8076937 | -1,39 | -2,62 | 0,03256 | -0,40 | -1,32 | 0,47128 | NM_032019          | ---           |
| 8160803 | -1,39 | -2,62 | 0,00019 | -1,26 | -2,40 | 0,01569 | --- BIRC7          | ---           |
| 8064031 | -1,39 | -2,62 | 0,01135 | -2,60 | -6,08 | 0,00068 | NM_139317          | ACVR2B        |
| 8078805 | -1,39 | -2,62 | 0,00062 | -0,52 | -1,44 | 0,15966 | NM_001106          | DKFZp761P0212 |
| 8019181 | -1,39 | -2,62 | 0,02251 | -1,61 | -3,04 | 0,02756 | ENST00000456250    | FCRLB         |
| 7906797 | -1,39 | -2,62 | 0,01169 | -0,88 | -1,83 | 0,26812 | NM_001002901       | ---           |
| 7937866 | -1,39 | -2,62 | 0,11045 | -1,00 | -2,00 | 0,00857 | --- C14orf115      | ---           |
| 7975702 | -1,39 | -2,62 | 0,00153 | -1,01 | -2,01 | 0,00431 | NM_018228          | ICAM5         |
| 8025621 | -1,39 | -2,62 | 0,01954 | -1,24 | -2,36 | 0,06947 | NM_003259          | C6orf146      |
| 8123685 | -1,39 | -2,62 | 0,00367 | -1,78 | -3,45 | 0,01229 | BC039349 UBE2E3    | ---           |
| 8166124 | -1,39 | -2,62 | 0,07535 | -0,90 | -1,87 | 0,23919 | NM_006357          | LOC100132284  |
| 8043630 | -1,39 | -2,62 | 0,06895 | -2,07 | -4,20 | 0,00016 | AY358167 ---       | ---           |
| 8120715 | -1,39 | -2,62 | 0,00397 | -0,86 | -1,81 | 0,00706 | --- MOGAT3         | ---           |
| 8141676 | -1,39 | -2,62 | 0,01012 | -1,79 | -3,46 | 0,00417 | NM_178176          | T1560         |
| 8146527 | -1,39 | -2,62 | 0,01842 | -1,13 | -2,18 | 0,00044 | AB111913 LOC389493 | ---           |
| 8139763 | -1,39 | -2,62 | 0,05603 | -0,88 | -1,83 | 0,02056 | NM_001145712       | LCTL          |
| 7989937 | -1,39 | -2,62 | 0,03183 | -0,80 | -1,75 | 0,00404 | NM_207338          | ADAM11        |
| 8007675 | -1,39 | -2,62 | 0,02207 | 0,12  | 1,09  | 0,79865 | NM_002390          | TCP10L        |
| 8069987 | -1,39 | -2,62 | 0,03733 | -1,15 | -2,22 | 0,00033 | NM_144659          | ---           |
| 7934966 | -1,39 | -2,62 | 0,02796 | -1,42 | -2,68 | 0,02118 | ---                | ---           |
| 8014033 | -1,39 | -2,62 | 0,00394 | -1,61 | -3,06 | 0,00102 | --- TNFAIP8L2      | ---           |
| 7905349 | -1,39 | -2,62 | 0,03082 | -1,94 | -3,83 | 0,00783 | NM_024575          | ---           |
| 7897076 | -1,39 | -2,62 | 0,05331 | -0,89 | -1,85 | 0,03103 | --- CACNA1B        | ---           |
| 8159734 | -1,39 | -2,62 | 0,01024 | -0,14 | -1,10 | 0,60018 | NM_000718          | INSM1         |
| 8061303 | -1,39 | -2,62 | 0,02047 | -1,19 | -2,27 | 0,03291 | NM_002196          | GOLT1A        |
| 7923628 | -1,39 | -2,62 | 0,08919 | -0,03 | -1,02 | 0,91924 | NM_198447          | DMRT3         |
| 8154043 | -1,39 | -2,62 | 0,00494 | -0,79 | -1,73 | 0,12567 | NM_021240          | ---           |
| 7954010 | -1,39 | -2,62 | 0,01859 | -1,71 | -3,26 | 0,00776 | --- HMHA1          | ---           |
| 8024170 | -1,39 | -2,63 | 0,01220 | 1,15  | 2,22  | 0,06022 | NM_012292          | FAM47B        |
| 8166665 | -1,39 | -2,63 | 0,00912 | -1,63 | -3,09 | 0,00898 | BC035026 AKR7L     | ---           |
| 7913138 | -1,39 | -2,63 | 0,00209 | -0,76 | -1,70 | 0,08833 | NM_201252          | GALR3         |
| 8072941 | -1,39 | -2,63 | 0,05197 | -2,57 | -5,93 | 0,02082 | NM_003614          | PTGER1        |
| 8034821 | -1,39 | -2,63 | 0,08609 | -1,11 | -2,16 | 0,01983 | NM_000955          | KCNJ4         |
| 8076072 | -1,39 | -2,63 | 0,06074 | -1,66 | -3,16 | 0,04583 | NM_152868          | TRIM73        |
| 8133625 | -1,39 | -2,63 | 0,04400 | -1,16 | -2,23 | 0,05200 | NM_198924          | ---           |
| 8082246 | -1,39 | -2,63 | 0,07553 | -3,02 | -8,09 | 0,00046 | --- DUSP26         | ---           |
| 8150197 | -1,39 | -2,63 | 0,00432 | -0,63 | -1,55 | 0,01937 | NM_024025          | C7orf13       |
| 8144082 | -1,39 | -2,63 | 0,08191 | 0,10  | 1,07  | 0,72183 | NR_026865          | ORM1          |
| 8157446 | -1,39 | -2,63 | 0,00124 | -0,72 | -1,65 | 0,06990 | NM_000607          | MAPK8IP1      |
| 8016261 | -1,39 | -2,63 | 0,03893 | -1,54 | -2,91 | 0,00896 | NM_005456          | FAM185A       |
| 8140461 | -1,39 | -2,63 | 0,06967 | -2,66 | -6,32 | 0,06040 | NM_001145268       | ETV4          |
| 8015806 | -1,39 | -2,63 | 0,01638 | 0,69  | 1,61  | 0,29192 | NM_001079675       | ---           |
| 8022243 | -1,39 | -2,63 | 0,04768 | -1,04 | -2,06 | 0,00756 | ---                | ---           |
| 8142993 | -1,40 | -2,63 | 0,03063 | -1,50 | -2,84 | 0,08342 | --- ADM2           | ---           |
| 8074063 | -1,40 | -2,63 | 0,02314 | -1,33 | -2,52 | 0,00926 | NM_024866          | ---           |
| 7996805 | -1,40 | -2,63 | 0,00267 | -1,06 | -2,09 | 0,06581 | --- OR10J3         | ---           |
| 7921442 | -1,40 | -2,63 | 0,00200 | -2,17 | -4,49 | 0,01534 | ENST00000389011    | KCNK15        |
| 8062873 | -1,40 | -2,63 | 0,00902 | 2,48  | 5,60  | 0,01312 | NM_022358          | MCHR2         |
| 8128447 | -1,40 | -2,63 | 0,00823 | -1,74 | -3,34 | 0,00046 | NM_001040179       | HOXB1         |
| 8016433 | -1,40 | -2,63 | 0,02656 | -1,51 | -2,86 | 0,02189 | NM_002144          | PAQR4         |
| 7992775 | -1,40 | -2,63 | 0,07701 | -0,25 | -1,19 | 0,39008 | NM_152341          | PHOSPHO1      |
| 8016540 | -1,40 | -2,63 | 0,06534 | -1,18 | -2,26 | 0,05947 | NM_001143804       | ---           |
| 7969770 | -1,40 | -2,63 | 0,01900 | -2,04 | -4,11 | 0,01553 | --- LASS3          | ---           |
| 7991546 | -1,40 | -2,63 | 0,01403 | -1,27 | -2,42 | 0,00045 | NM_178842          | AMH           |
| 8024429 | -1,40 | -2,63 | 0,04748 | -1,99 | -3,98 | 0,00277 | NM_000479          | UNC13C        |
| 7983779 | -1,40 | -2,63 | 0,00825 | -0,94 | -1,92 | 0,01558 | NM_001080534       | MIR93         |
| 8141421 | -1,40 | -2,63 | 0,03881 | -1,84 | -3,59 | 0,00001 | NR_029510          | ---           |
| 8048022 | -1,40 | -2,63 | 0,00949 | -1,02 | -2,02 | 0,05808 | --- GDF5           | ---           |
| 8062134 | -1,40 | -2,63 | 0,06773 | -0,81 | -1,75 | 0,08832 | NM_000557          | CPA1          |
| 8136235 | -1,40 | -2,63 | 0,01408 | -1,30 | -2,46 | 0,00400 | NM_001868          | POU5F1        |
| 8178470 | -1,40 | -2,63 | 0,02703 | -1,86 | -3,63 | 0,00127 | NM_002701          | ---           |
| 7986635 | -1,40 | -2,64 | 0,05057 | -2,59 | -6,02 | 0,00964 | --- ICAM4          | ---           |
| 8025612 | -1,40 | -2,64 | 0,00097 | -1,32 | -2,49 | 0,15396 | NM_022377          | ---           |
| 7972251 | -1,40 | -2,64 | 0,10718 | -1,69 | -3,22 | 0,00094 | ---                | ---           |
| 8097445 | -1,40 | -2,64 | 0,07722 | -1,29 | -2,44 | 0,00525 | --- CRYGA          | ---           |

|         |       |       |         |       |       |         |              |           |
|---------|-------|-------|---------|-------|-------|---------|--------------|-----------|
| 8058535 | -1,40 | -2,64 | 0,03454 | -1,65 | -3,13 | 0,01043 | NM_014617    | ---       |
| 8104012 | -1,40 | -2,64 | 0,00714 | -0,87 | -1,82 | 0,02181 | ---          | FOXN1     |
| 8005894 | -1,40 | -2,64 | 0,00606 | -0,12 | -1,09 | 0,62496 | NM_003593    | MMEL1     |
| 7911767 | -1,40 | -2,64 | 0,00903 | -0,88 | -1,84 | 0,00615 | NM_033467    | FLJ46321  |
| 8156103 | -1,40 | -2,64 | 0,01034 | -0,99 | -1,99 | 0,02685 | NM_001001670 | ---       |
| 8062821 | -1,40 | -2,64 | 0,17406 | -1,33 | -2,51 | 0,00352 | ---          | C6orf126  |
| 8118990 | -1,40 | -2,64 | 0,02466 | 0,64  | 1,55  | 0,04986 | NM_207409    | ---       |
| 8075863 | -1,40 | -2,64 | 0,03745 | -0,86 | -1,82 | 0,01532 | ---          | MIR7-2    |
| 7985765 | -1,40 | -2,64 | 0,05479 | -1,21 | -2,32 | 0,00276 | NR_029606    | ---       |
| 7968630 | -1,40 | -2,64 | 0,02274 | -1,05 | -2,07 | 0,01903 | ---          | OGFR      |
| 8063955 | -1,40 | -2,64 | 0,03144 | 0,17  | 1,13  | 0,80045 | NM_007346    | STRC      |
| 7988177 | -1,40 | -2,64 | 0,01715 | -1,33 | -2,51 | 0,01150 | NM_153700    | SCN4B     |
| 7952004 | -1,40 | -2,64 | 0,01124 | -1,66 | -3,17 | 0,05096 | NM_174934    | APLNR     |
| 7948167 | -1,40 | -2,64 | 0,05599 | -1,80 | -3,47 | 0,00354 | NM_005161    | ---       |
| 7972416 | -1,40 | -2,64 | 0,03400 | -0,85 | -1,80 | 0,03057 | ---          | POM121L1P |
| 8074867 | -1,40 | -2,64 | 0,09669 | -2,90 | -7,45 | 0,00012 | NR_024591    | ---       |
| 8103538 | -1,40 | -2,64 | 0,03336 | -1,21 | -2,31 | 0,04279 | ---          | ---       |
| 8136446 | -1,40 | -2,64 | 0,00892 | -1,32 | -2,49 | 0,00068 | ---          | LRRC31    |
| 8092021 | -1,40 | -2,64 | 0,07292 | -0,85 | -1,80 | 0,00174 | NM_024727    | C8orf73   |
| 8153424 | -1,40 | -2,64 | 0,12760 | 1,14  | 2,20  | 0,01051 | NM_001100878 | MTL5      |
| 7949956 | -1,40 | -2,64 | 0,00521 | 0,04  | 1,02  | 0,88436 | NM_004923    | ZNRF2     |
| 8132062 | -1,40 | -2,64 | 0,09760 | -0,42 | -1,34 | 0,32554 | NM_147128    | DLGAP1    |
| 8022085 | -1,40 | -2,64 | 0,00408 | -1,59 | -3,02 | 0,00688 | NM_004746    | OR2AK2    |
| 7911243 | -1,40 | -2,64 | 0,00367 | -1,79 | -3,45 | 0,00786 | NM_001004491 | C8orf30A  |
| 8148772 | -1,40 | -2,64 | 0,01787 | -0,56 | -1,47 | 0,23995 | NM_016458    | FABP6     |
| 8109629 | -1,40 | -2,64 | 0,02686 | -0,80 | -1,74 | 0,00058 | NM_001040442 | TMEM151B  |
| 8120004 | -1,40 | -2,64 | 0,01330 | -1,48 | -2,80 | 0,00361 | NM_001137560 | ---       |
| 7950553 | -1,40 | -2,64 | 0,03452 | -1,50 | -2,84 | 0,01630 | ---          | NOSIP     |
| 8038395 | -1,40 | -2,64 | 0,15131 | -0,80 | -1,74 | 0,12434 | NM_015953    | ---       |
| 7897964 | -1,40 | -2,64 | 0,00055 | -1,22 | -2,32 | 0,00062 | ---          | ---       |
| 7990618 | -1,40 | -2,64 | 0,03317 | -1,31 | -2,48 | 0,00652 | ---          | KRT1      |
| 7963491 | -1,40 | -2,64 | 0,02239 | -1,41 | -2,65 | 0,03163 | NM_006121    | ZNF628    |
| 8031489 | -1,40 | -2,64 | 0,01144 | -1,24 | -2,36 | 0,04052 | NM_033113    | ---       |
| 8126432 | -1,40 | -2,64 | 0,04811 | -0,83 | -1,77 | 0,02831 | ---          | LILRB5    |
| 8039180 | -1,40 | -2,64 | 0,00430 | -2,11 | -4,31 | 0,00866 | NM_001081442 | ARHGAP30  |
| 7921752 | -1,40 | -2,64 | 0,05925 | -1,60 | -3,03 | 0,00332 | NM_001025598 | ---       |
| 8123765 | -1,40 | -2,65 | 0,02710 | -1,98 | -3,93 | 0,00274 | ---          | ---       |
| 8168729 | -1,40 | -2,65 | 0,01480 | -0,87 | -1,83 | 0,00222 | ---          | SLC27A5   |
| 8039779 | -1,40 | -2,65 | 0,01721 | -0,79 | -1,73 | 0,22042 | NM_012254    | CILP      |
| 7989750 | -1,40 | -2,65 | 0,08449 | -0,90 | -1,86 | 0,00015 | NM_003613    | ---       |
| 8085372 | -1,40 | -2,65 | 0,01937 | -2,07 | -4,20 | 0,00024 | ---          | LOC399904 |
| 7949371 | -1,40 | -2,65 | 0,09365 | -1,10 | -2,15 | 0,04120 | AK124141     | ---       |
| 7907655 | -1,41 | -2,65 | 0,15597 | -2,18 | -4,53 | 0,10161 | ---          | ---       |
| 8128865 | -1,41 | -2,65 | 0,05211 | -0,84 | -1,79 | 0,11672 | ---          | ---       |
| 8088977 | -1,41 | -2,65 | 0,02298 | -1,85 | -3,60 | 0,00072 | ---          | PRSS30P   |
| 7998872 | -1,41 | -2,65 | 0,00606 | -1,65 | -3,13 | 0,00169 | NR_026864    | PPP2R2C   |
| 8099218 | -1,41 | -2,65 | 0,01968 | 1,22  | 2,33  | 0,01627 | NM_020416    | ---       |
| 8132513 | -1,41 | -2,65 | 0,00012 | -1,17 | -2,26 | 0,00065 | ---          | EN1       |
| 8054831 | -1,41 | -2,65 | 0,01831 | -1,51 | -2,84 | 0,04749 | NM_001426    | TTL13     |
| 7985963 | -1,41 | -2,65 | 0,05592 | 0,21  | 1,16  | 0,44309 | NM_001029964 | ---       |
| 8172189 | -1,41 | -2,65 | 0,00820 | -0,58 | -1,50 | 0,02602 | ---          | ---       |
| 7963210 | -1,41 | -2,65 | 0,02655 | -1,91 | -3,77 | 0,00216 | ---          | ---       |
| 8103411 | -1,41 | -2,65 | 0,00750 | -0,86 | -1,82 | 0,06143 | ---          | GP9       |
| 8082473 | -1,41 | -2,65 | 0,02117 | -1,24 | -2,37 | 0,00846 | NM_000174    | TMEM72    |
| 7927179 | -1,41 | -2,65 | 0,07962 | -2,32 | -5,01 | 0,00509 | NM_001123376 | OR7E24    |
| 8025476 | -1,41 | -2,66 | 0,04640 | -1,76 | -3,40 | 0,02037 | NM_001079935 | ---       |
| 8063185 | -1,41 | -2,66 | 0,12533 | -1,99 | -3,97 | 0,00535 | ---          | ---       |
| 8124327 | -1,41 | -2,66 | 0,03521 | -1,84 | -3,57 | 0,00574 | ---          | VAV1      |
| 8025076 | -1,41 | -2,66 | 0,04720 | 1,38  | 2,60  | 0,03372 | NM_005428    | ---       |
| 8010186 | -1,41 | -2,66 | 0,00650 | -0,96 | -1,95 | 0,14381 | ---          | KIAA1755  |
| 8066231 | -1,41 | -2,66 | 0,04701 | -1,87 | -3,65 | 0,03247 | NM_001029864 | C14orf70  |
| 7976778 | -1,41 | -2,66 | 0,03317 | -0,76 | -1,70 | 0,02651 | AK094097     | FAM138A   |
| 7911323 | -1,41 | -2,66 | 0,22406 | -2,38 | -5,21 | 0,01131 | NR_026818    | FAM138A   |
| 8031984 | -1,41 | -2,66 | 0,22406 | -2,38 | -5,21 | 0,01131 | NR_026818    | C21orf84  |
| 8070681 | -1,41 | -2,66 | 0,02278 | 0,11  | 1,08  | 0,52118 | AF426261     | C17orf70  |
| 8019194 | -1,41 | -2,66 | 0,04468 | 0,22  | 1,17  | 0,70266 | NR_033338    | ---       |
| 7934613 | -1,41 | -2,66 | 0,10906 | -1,09 | -2,13 | 0,01990 | ---          | DUPD1     |
| 7934527 | -1,41 | -2,66 | 0,00979 | -1,02 | -2,03 | 0,12053 | NM_001003892 | ---       |
| 8088140 | -1,41 | -2,66 | 0,04501 | -0,78 | -1,72 | 0,00939 | ---          | TFPT      |
| 8039131 | -1,41 | -2,66 | 0,00341 | -0,31 | -1,24 | 0,52125 | NM_013342    | FAM153C   |
| 8110417 | -1,41 | -2,66 | 0,11187 | -1,33 | -2,52 | 0,09104 | NM_001079527 | ADAMTS13  |
| 8159036 | -1,41 | -2,66 | 0,00760 | -0,71 | -1,64 | 0,13227 | NM_139025    | MIR218-2  |
| 8115730 | -1,41 | -2,66 | 0,08102 | -1,05 | -2,07 | 0,02834 | NR_029632    | ---       |

|         |       |       |         |       |        |         |                 |           |  |
|---------|-------|-------|---------|-------|--------|---------|-----------------|-----------|--|
| 8078567 | -1,41 | -2,66 | 0,06984 | -1,77 | -3,40  | 0,01515 | ---             | DIRAS1    |  |
| 8032518 | -1,41 | -2,66 | 0,05027 | -0,73 | -1,66  | 0,26355 | NM_145173       | OR10G9    |  |
| 7944799 | -1,41 | -2,66 | 0,01297 | -1,82 | -3,52  | 0,00002 | NM_001001953    | BARX1     |  |
| 8162472 | -1,41 | -2,66 | 0,04786 | -1,83 | -3,55  | 0,01308 | NM_021570       | ---       |  |
| 8121670 | -1,41 | -2,66 | 0,01921 | -1,50 | -2,83  | 0,03067 | ---             | SPRN      |  |
| 7937228 | -1,41 | -2,66 | 0,00605 | -1,35 | -2,54  | 0,01540 | NM_001012508    | SNTA1     |  |
| 8065683 | -1,41 | -2,66 | 0,06555 | -0,68 | -1,60  | 0,28667 | NM_003098       | FEV       |  |
| 8059014 | -1,41 | -2,66 | 0,02005 | -1,86 | -3,63  | 0,00230 | NM_017521       | GCM2      |  |
| 8123910 | -1,41 | -2,66 | 0,01868 | -1,03 | -2,04  | 0,00817 | NM_004752       | ---       |  |
| 7971163 | -1,41 | -2,66 | 0,39987 | -2,09 | -4,25  | 0,06350 | ---             | COL11A2   |  |
| 8178897 | -1,41 | -2,66 | 0,14808 | -0,60 | -1,51  | 0,33948 | NM_001163771    | COL11A2   |  |
| 8180105 | -1,41 | -2,66 | 0,14808 | -0,60 | -1,51  | 0,33948 | NM_001163771    | KLF14     |  |
| 8142971 | -1,41 | -2,67 | 0,03667 | -2,05 | -4,14  | 0,00003 | NM_138693       | ZNF839    |  |
| 7976967 | -1,41 | -2,67 | 0,01166 | 0,83  | 1,78   | 0,05370 | NM_018335       | ---       |  |
| 8090416 | -1,41 | -2,67 | 0,01454 | -1,48 | -2,79  | 0,05317 | ---             | OR4C11    |  |
| 7948105 | -1,42 | -2,67 | 0,04286 | -1,22 | -2,33  | 0,01608 | NM_001004700    | SLC25A33  |  |
| 7897460 | -1,42 | -2,67 | 0,02502 | 0,82  | 1,76   | 0,02320 | NM_032315       | ELFN1     |  |
| 8131096 | -1,42 | -2,67 | 0,00174 | -0,50 | -1,42  | 0,08174 | NM_001128636    | MIR98     |  |
| 8173005 | -1,42 | -2,67 | 0,09485 | -2,06 | -4,18  | 0,00085 | NR_029513       | CACNA1H   |  |
| 7992147 | -1,42 | -2,67 | 0,00342 | -0,46 | -1,37  | 0,09131 | NM_021098       | ---       |  |
| 8059012 | -1,42 | -2,67 | 0,01925 | -1,43 | -2,70  | 0,03430 | ---             | SLAMF9    |  |
| 7921516 | -1,42 | -2,67 | 0,02677 | -1,18 | -2,26  | 0,00755 | NM_033438       | LILRA2    |  |
| 8031207 | -1,42 | -2,67 | 0,01756 | -1,06 | -2,08  | 0,03307 | NM_001130917    | FAM182A   |  |
| 8061490 | -1,42 | -2,67 | 0,07475 | -2,40 | -5,29  | 0,00048 | NR_026713       | TCF24     |  |
| 8151125 | -1,42 | -2,67 | 0,08069 | -1,67 | -3,17  | 0,00080 | ENST00000340798 | ---       |  |
| 8021824 | -1,42 | -2,67 | 0,11428 | -0,62 | -1,54  | 0,00977 | ---             | EMX1      |  |
| 8042701 | -1,42 | -2,67 | 0,01457 | -1,30 | -2,47  | 0,00529 | NM_004097       | CYP4F22   |  |
| 8026424 | -1,42 | -2,67 | 0,01500 | -0,73 | -1,66  | 0,00838 | NM_173483       | ---       |  |
| 7933217 | -1,42 | -2,67 | 0,00760 | -1,15 | -2,22  | 0,00178 | ---             | ---       |  |
| 8058566 | -1,42 | -2,67 | 0,00004 | -1,68 | -3,21  | 0,00968 | ---             | LRRC24    |  |
| 8153868 | -1,42 | -2,67 | 0,05833 | -1,10 | -2,15  | 0,02909 | NM_001024678    | DDN       |  |
| 7962930 | -1,42 | -2,67 | 0,05511 | -1,13 | -2,19  | 0,03095 | NM_015086       | SUSD5     |  |
| 8086051 | -1,42 | -2,67 | 0,04238 | -1,20 | -2,30  | 0,03742 | NM_015551       | HCFC1R1   |  |
| 7998902 | -1,42 | -2,67 | 0,01276 | -0,88 | -1,84  | 0,00934 | NM_017885       | NXPH3     |  |
| 8008208 | -1,42 | -2,67 | 0,01103 | -0,56 | -1,48  | 0,19660 | NM_007225       | ---       |  |
| 7979689 | -1,42 | -2,67 | 0,00588 | -1,55 | -2,92  | 0,01652 | ---             | ---       |  |
| 7917357 | -1,42 | -2,67 | 0,07117 | -2,37 | -5,17  | 0,00180 | ---             | ---       |  |
| 7992067 | -1,42 | -2,67 | 0,04491 | -1,80 | -3,48  | 0,00039 | ---             | TACSTD2   |  |
| 7916584 | -1,42 | -2,67 | 0,07521 | 2,84  | 7,17   | 0,00061 | NM_002353       | TMEM174   |  |
| 8106176 | -1,42 | -2,67 | 0,03598 | -1,85 | -3,61  | 0,00699 | NM_153217       | LQK1      |  |
| 7924184 | -1,42 | -2,68 | 0,00995 | 0,42  | 1,34   | 0,00880 | NR_027285       | HAND1     |  |
| 8115391 | -1,42 | -2,68 | 0,08799 | -0,38 | -1,30  | 0,00712 | NM_004821       | ---       |  |
| 7918048 | -1,42 | -2,68 | 0,05082 | -0,70 | -1,62  | 0,01883 | ---             | ---       |  |
| 7938420 | -1,42 | -2,68 | 0,11073 | -2,66 | -6,30  | 0,01103 | ---             | SOST      |  |
| 8015827 | -1,42 | -2,68 | 0,00282 | -1,58 | -2,99  | 0,00006 | NM_025237       | KRBA1     |  |
| 8137133 | -1,42 | -2,68 | 0,03362 | -0,90 | -1,86  | 0,13148 | NM_032534       | FGF3      |  |
| 7950036 | -1,42 | -2,68 | 0,00670 | -1,32 | -2,50  | 0,01791 | NM_005247       | CCDC120   |  |
| 8167430 | -1,42 | -2,68 | 0,02188 | 0,56  | 1,47   | 0,04242 | NM_033626       | ---       |  |
| 8035884 | -1,42 | -2,68 | 0,00300 | -1,73 | -3,32  | 0,00037 | ---             | ---       |  |
| 8154057 | -1,42 | -2,68 | 0,01792 | -2,07 | -4,20  | 0,00511 | ---             | ---       |  |
| 8156759 | -1,42 | -2,68 | 0,01178 | -1,18 | -2,26  | 0,02499 | ---             | NEUROD2   |  |
| 8014865 | -1,42 | -2,68 | 0,02682 | -1,46 | -2,74  | 0,00029 | NM_006160       | AMAC1L2   |  |
| 8020162 | -1,42 | -2,68 | 0,06244 | -2,57 | -5,94  | 0,00230 | NM_054028       | C3orf32   |  |
| 8085122 | -1,42 | -2,68 | 0,04037 | -1,50 | -2,83  | 0,00562 | AB024705        | METRIN    |  |
| 7992038 | -1,42 | -2,68 | 0,00562 | -1,42 | -2,68  | 0,04889 | NM_024042       | OBP2B     |  |
| 8164843 | -1,42 | -2,68 | 0,00317 | -1,34 | -2,52  | 0,00461 | NM_014581       | CELF3     |  |
| 7920027 | -1,42 | -2,68 | 0,02891 | -2,21 | -4,63  | 0,00041 | NM_007185       | HTR3E     |  |
| 8084284 | -1,42 | -2,68 | 0,00275 | -1,54 | -2,90  | 0,00054 | NM_182589       | ---       |  |
| 8103620 | -1,42 | -2,68 | 0,05639 | -0,86 | -1,82  | 0,01537 | ---             | ---       |  |
| 8095331 | -1,42 | -2,68 | 0,00730 | -2,30 | -4,93  | 0,00051 | ---             | ---       |  |
| 8106477 | -1,42 | -2,68 | 0,01468 | -2,17 | -4,49  | 0,00510 | ---             | TTY1      |  |
| 8176429 | -1,42 | -2,68 | 0,00372 | -1,44 | -2,70  | 0,00378 | NR_001538       | TTY1      |  |
| 8177108 | -1,42 | -2,68 | 0,00372 | -1,44 | -2,70  | 0,00378 | NR_001538       | COX6B2    |  |
| 8039462 | -1,42 | -2,68 | 0,03824 | -1,12 | -2,17  | 0,00460 | NM_144613       | ---       |  |
| 8112476 | -1,42 | -2,68 | 0,47609 | -5,52 | -45,93 | 0,00008 | ---             | SAP30     |  |
| 8098342 | -1,42 | -2,68 | 0,13007 | -2,02 | -4,04  | 0,03799 | NM_003864       | MYBPH     |  |
| 7923534 | -1,42 | -2,68 | 0,02843 | -1,48 | -2,78  | 0,00975 | NM_004997       | LOC388906 |  |
| 8073582 | -1,42 | -2,68 | 0,03883 | -2,18 | -4,52  | 0,00018 | BC039496        | ---       |  |
| 8068510 | -1,43 | -2,69 | 0,00750 | -2,73 | -6,65  | 0,00015 | ---             | PRRT1     |  |
| 8125321 | -1,43 | -2,69 | 0,01043 | -1,21 | -2,31  | 0,06291 | NM_030651       | STRC      |  |
| 7988132 | -1,43 | -2,69 | 0,02238 | -1,33 | -2,51  | 0,01081 | NM_153700       | MIR219-1  |  |
| 8118632 | -1,43 | -2,69 | 0,06736 | -2,14 | -4,41  | 0,00050 | NR_029633       | OXT       |  |
| 8060604 | -1,43 | -2,69 | 0,10820 | -1,60 | -3,03  | 0,02667 | NM_000915       | ABCC6     |  |

|         |       |       |         |       |        |         |                 |           |
|---------|-------|-------|---------|-------|--------|---------|-----------------|-----------|
| 7999727 | -1,43 | -2,69 | 0,06221 | -0,18 | -1,13  | 0,44597 | NM_001171       | ---       |
| 7981748 | -1,43 | -2,69 | 0,08601 | -1,15 | -2,22  | 0,08231 | ---             | FLJ35424  |
| 8093821 | -1,43 | -2,69 | 0,01605 | -1,36 | -2,56  | 0,07805 | ENST00000404649 | C4orf26   |
| 8095767 | -1,43 | -2,69 | 0,08058 | -1,26 | -2,40  | 0,03117 | AK300227        | KIR3DS1   |
| 8039871 | -1,43 | -2,69 | 0,05295 | -1,89 | -3,70  | 0,00408 | NM_001083539    | METRNL    |
| 8010897 | -1,43 | -2,69 | 0,10766 | -1,09 | -2,12  | 0,19041 | NM_001004431    | RDH8      |
| 8025515 | -1,43 | -2,69 | 0,01105 | -1,66 | -3,16  | 0,00025 | NM_015725       | ---       |
| 8121559 | -1,43 | -2,69 | 0,01160 | -1,72 | -3,29  | 0,00025 | ---             | LYSMD2    |
| 7988833 | -1,43 | -2,69 | 0,00293 | -0,91 | -1,89  | 0,06998 | NM_153374       | DDX27     |
| 8063315 | -1,43 | -2,69 | 0,05542 | 0,40  | 1,32   | 0,16398 | NM_017895       | COL17A1   |
| 7936144 | -1,43 | -2,69 | 0,00848 | -1,69 | -3,22  | 0,00031 | NM_000494       | ---       |
| 7941170 | -1,43 | -2,69 | 0,02603 | -1,01 | -2,02  | 0,00101 | ---             | ADH4      |
| 8101852 | -1,43 | -2,69 | 0,00034 | -1,57 | -2,96  | 0,00401 | NM_000670       | MAGEB3    |
| 8166613 | -1,43 | -2,69 | 0,04436 | -1,05 | -2,07  | 0,06957 | NM_002365       | DDX11L2   |
| 8054758 | -1,43 | -2,69 | 0,16446 | -1,92 | -3,79  | 0,04625 | NR_024005       | ANKRD35   |
| 7904796 | -1,43 | -2,69 | 0,10864 | -1,66 | -3,15  | 0,06666 | NM_144698       | ---       |
| 8168602 | -1,43 | -2,69 | 0,14541 | -2,39 | -5,26  | 0,00016 | ---             | FAM47A    |
| 8172017 | -1,43 | -2,69 | 0,00383 | -1,03 | -2,04  | 0,04232 | AK292354        | PRAMEF20  |
| 7898030 | -1,43 | -2,69 | 0,03080 | -1,21 | -2,32  | 0,08830 | NM_001099852    | GPR109A   |
| 7967318 | -1,43 | -2,69 | 0,06944 | -1,20 | -2,30  | 0,01016 | NM_177551       | IL20RA    |
| 8129837 | -1,43 | -2,69 | 0,03266 | -2,44 | -5,44  | 0,00278 | NM_014432       | ATP6V1B1  |
| 8042537 | -1,43 | -2,69 | 0,02612 | -1,17 | -2,24  | 0,02316 | NM_001692       | ---       |
| 7910638 | -1,43 | -2,69 | 0,00105 | -1,30 | -2,46  | 0,00177 | ---             | ---       |
| 7979696 | -1,43 | -2,69 | 0,22547 | -1,87 | -3,67  | 0,00870 | ---             | AMAC1L3   |
| 8004428 | -1,43 | -2,69 | 0,04842 | -2,22 | -4,67  | 0,00693 | NM_001102614    | ---       |
| 8158664 | -1,43 | -2,69 | 0,13067 | -1,20 | -2,30  | 0,00045 | ---             | PGF       |
| 7980233 | -1,43 | -2,69 | 0,01724 | -1,12 | -2,18  | 0,06155 | NM_002632       | APC2      |
| 8024306 | -1,43 | -2,69 | 0,00053 | -1,62 | -3,06  | 0,00314 | NM_005883       | MLN       |
| 8125798 | -1,43 | -2,69 | 0,09824 | -1,84 | -3,58  | 0,06725 | NM_002418       | CD300LD   |
| 8018184 | -1,43 | -2,69 | 0,00722 | -0,91 | -1,88  | 0,00344 | NM_001115152    | PRR12     |
| 8030403 | -1,43 | -2,70 | 0,00387 | 0,51  | 1,42   | 0,24965 | NM_020719       | FAM24A    |
| 7931155 | -1,43 | -2,70 | 0,03534 | -0,97 | -1,96  | 0,10033 | NM_001029888    | ATCAY     |
| 8024712 | -1,43 | -2,70 | 0,00623 | -1,09 | -2,12  | 0,00901 | NM_033064       | OR5B21    |
| 7948330 | -1,43 | -2,70 | 0,05072 | -1,58 | -2,99  | 0,02933 | NM_001005218    | TREML4    |
| 8119427 | -1,43 | -2,70 | 0,01262 | -1,13 | -2,19  | 0,01155 | NM_198153       | IL23A     |
| 7956251 | -1,43 | -2,70 | 0,03033 | -1,48 | -2,79  | 0,01194 | NM_016584       | NS3BP     |
| 7937474 | -1,43 | -2,70 | 0,01567 | -0,18 | -1,13  | 0,55790 | AF435951        | C7orf61   |
| 8141522 | -1,43 | -2,70 | 0,00104 | -1,21 | -2,31  | 0,02072 | BC031966        | ---       |
| 7907051 | -1,43 | -2,70 | 0,00166 | -1,53 | -2,89  | 0,02708 | ---             | CD28      |
| 8047677 | -1,43 | -2,70 | 0,01568 | -0,74 | -1,67  | 0,00026 | NM_006139       | CRYGD     |
| 8058520 | -1,43 | -2,70 | 0,01394 | -0,98 | -1,98  | 0,11285 | NM_006891       | NUDT1     |
| 8131101 | -1,43 | -2,70 | 0,08614 | -1,31 | -2,48  | 0,00180 | NM_198949       | ---       |
| 8048114 | -1,43 | -2,70 | 0,05882 | -1,16 | -2,24  | 0,05121 | ---             | SLC22A11  |
| 7941062 | -1,43 | -2,70 | 0,03409 | -1,24 | -2,36  | 0,01935 | NM_018484       | POU2AF1   |
| 7951596 | -1,43 | -2,70 | 0,01702 | -1,36 | -2,56  | 0,00085 | NM_006235       | GTF2H4    |
| 8118023 | -1,43 | -2,70 | 0,04262 | 0,07  | 1,05   | 0,89058 | NM_001517       | OPN4      |
| 7928823 | -1,43 | -2,70 | 0,00885 | -0,81 | -1,75  | 0,04882 | NM_001030015    | HOXB3     |
| 8016444 | -1,43 | -2,70 | 0,01166 | -1,08 | -2,11  | 0,01210 | NM_002146       | ---       |
| 7984684 | -1,43 | -2,70 | 0,02871 | -2,30 | -4,93  | 0,00348 | ---             | ---       |
| 7984983 | -1,43 | -2,70 | 0,02871 | -2,30 | -4,93  | 0,00348 | ---             | ---       |
| 7984987 | -1,43 | -2,70 | 0,02871 | -2,30 | -4,93  | 0,00348 | ---             | ---       |
| 7990307 | -1,43 | -2,70 | 0,02871 | -2,30 | -4,93  | 0,00348 | ---             | ---       |
| 7981385 | -1,43 | -2,70 | 0,00032 | -0,95 | -1,93  | 0,05720 | ---             | C4orf39   |
| 8098167 | -1,43 | -2,70 | 0,00486 | -0,04 | -1,02  | 0,89003 | BC022381        | ---       |
| 7989251 | -1,43 | -2,70 | 0,00620 | -0,48 | -1,39  | 0,01536 | ---             | HSD17B14  |
| 8038213 | -1,43 | -2,70 | 0,00357 | 0,12  | 1,08   | 0,75722 | NM_016246       | ---       |
| 7910634 | -1,43 | -2,70 | 0,02138 | -0,97 | -1,96  | 0,01920 | ---             | GGT7      |
| 8065798 | -1,43 | -2,70 | 0,02262 | -1,07 | -2,10  | 0,00602 | NM_178026       | ---       |
| 8068786 | -1,43 | -2,70 | 0,02209 | -1,78 | -3,43  | 0,00323 | ---             | SSPO      |
| 8137151 | -1,43 | -2,70 | 0,04398 | -1,28 | -2,43  | 0,01615 | NM_198455       | ---       |
| 8055494 | -1,44 | -2,70 | 0,07202 | -2,01 | -4,03  | 0,00001 | ---             | LOC729724 |
| 8111214 | -1,44 | -2,70 | 0,47910 | -5,91 | -60,02 | 0,00044 | XM_001131132    | IQSEC3    |
| 7952897 | -1,44 | -2,70 | 0,00441 | -1,59 | -3,01  | 0,00008 | NM_001170738    | ---       |
| 7966425 | -1,44 | -2,70 | 0,10429 | -1,30 | -2,46  | 0,09213 | ---             | TMEM195   |
| 8138337 | -1,44 | -2,70 | 0,00177 | -0,75 | -1,68  | 0,03562 | NM_001004320    | AVIL      |
| 7964575 | -1,44 | -2,71 | 0,03141 | -1,07 | -2,09  | 0,12242 | AK022448        | CCNJL     |
| 8115584 | -1,44 | -2,71 | 0,01323 | 2,61  | 6,12   | 0,00001 | NM_024565       | ---       |
| 8119239 | -1,44 | -2,71 | 0,00211 | -0,68 | -1,60  | 0,00553 | ---             | TPPP3     |
| 8002020 | -1,44 | -2,71 | 0,01076 | -0,45 | -1,36  | 0,34911 | NM_016140       | SPDYE8P   |
| 8133600 | -1,44 | -2,71 | 0,16709 | -2,67 | -6,38  | 0,00038 | NR_003664       | SPDYE8P   |
| 8140009 | -1,44 | -2,71 | 0,16709 | -2,67 | -6,38  | 0,00038 | NR_003664       | SPDYE7P   |
| 8133209 | -1,44 | -2,71 | 0,23791 | -2,53 | -5,76  | 0,00163 | NR_003666       | PRSS50    |
| 8086660 | -1,44 | -2,71 | 0,06984 | -0,95 | -1,94  | 0,15517 | NM_013270       | CBX4      |



|         |       |       |         |       |       |         |                 |              |
|---------|-------|-------|---------|-------|-------|---------|-----------------|--------------|
| 8019018 | -1,44 | -2,71 | 0,00231 | 1,25  | 2,38  | 0,05393 | NM_003655       | ---          |
| 8026385 | -1,44 | -2,71 | 0,08625 | -1,71 | -3,27 | 0,03599 | ---             | NBPF6        |
| 7903490 | -1,44 | -2,71 | 0,01358 | -1,75 | -3,37 | 0,00095 | NM_001143987    | ---          |
| 8083318 | -1,44 | -2,71 | 0,00357 | -1,03 | -2,04 | 0,00139 | ---             | GABPA        |
| 8068039 | -1,44 | -2,71 | 0,01670 | -0,46 | -1,37 | 0,42673 | NM_002040       | CHGA         |
| 7976322 | -1,44 | -2,71 | 0,02109 | -1,07 | -2,10 | 0,00719 | NM_001275       | ---          |
| 7910692 | -1,44 | -2,71 | 0,00021 | -1,53 | -2,90 | 0,00905 | ---             | DEFB109P1B   |
| 8144392 | -1,44 | -2,71 | 0,01224 | -0,56 | -1,47 | 0,04616 | NR_003668       | DEFB109P1B   |
| 8149245 | -1,44 | -2,71 | 0,01224 | -0,56 | -1,47 | 0,04616 | NR_003668       | TCEAL3       |
| 8169044 | -1,44 | -2,71 | 0,17655 | -0,96 | -1,95 | 0,07456 | NM_001006933    | RETN         |
| 8025278 | -1,44 | -2,71 | 0,07400 | -1,99 | -3,96 | 0,00526 | NM_020415       | EFNA2        |
| 8024250 | -1,44 | -2,71 | 0,05844 | -0,63 | -1,55 | 0,02565 | NM_001405       | C12orf50     |
| 7965249 | -1,44 | -2,71 | 0,00055 | -1,09 | -2,13 | 0,08207 | BC038413        | ---          |
| 8005747 | -1,44 | -2,71 | 0,03703 | -2,34 | -5,08 | 0,00001 | ---             | ---          |
| 8001385 | -1,44 | -2,71 | 0,02794 | -0,92 | -1,90 | 0,04546 | ---             | ---          |
| 8151250 | -1,44 | -2,71 | 0,02244 | -2,05 | -4,14 | 0,00024 | ---             | CLEC17A      |
| 8026350 | -1,44 | -2,71 | 0,01017 | -2,05 | -4,13 | 0,00041 | NM_207390       | B4GALNT4     |
| 7937341 | -1,44 | -2,71 | 0,01189 | 0,20  | 1,15  | 0,45672 | NM_178537       | FGF22        |
| 8023990 | -1,44 | -2,71 | 0,06042 | -1,27 | -2,41 | 0,00375 | NM_020637       | ---          |
| 7915275 | -1,44 | -2,71 | 0,05517 | -1,26 | -2,40 | 0,02723 | ---             | ---          |
| 7930274 | -1,44 | -2,71 | 0,05493 | -1,51 | -2,84 | 0,06344 | ---             | ---          |
| 8157214 | -1,44 | -2,71 | 0,01895 | -1,34 | -2,53 | 0,03507 | ---             | ---          |
| 8052674 | -1,44 | -2,71 | 0,07029 | -2,08 | -4,24 | 0,01966 | ---             | TTC24        |
| 7906177 | -1,44 | -2,71 | 0,02156 | -1,28 | -2,43 | 0,00086 | NM_001105669    | CLIC6        |
| 8068383 | -1,44 | -2,71 | 0,01161 | -1,17 | -2,26 | 0,04265 | NM_053277       | MIA          |
| 8028924 | -1,44 | -2,71 | 0,13049 | -0,91 | -1,88 | 0,14325 | NM_006533       | NRARP        |
| 8165508 | -1,44 | -2,72 | 0,02644 | 1,10  | 2,14  | 0,03749 | NM_001004354    | TRIM46       |
| 7905951 | -1,44 | -2,72 | 0,01672 | -1,00 | -2,01 | 0,04558 | NM_025058       | HBM          |
| 7991758 | -1,44 | -2,72 | 0,05914 | -0,35 | -1,27 | 0,01959 | NM_001003938    | OR5H6        |
| 8081202 | -1,44 | -2,72 | 0,01514 | -1,21 | -2,32 | 0,02888 | NM_001005479    | ---          |
| 8176673 | -1,44 | -2,72 | 0,01768 | -1,07 | -2,10 | 0,00156 | ---             | ---          |
| 8177184 | -1,44 | -2,72 | 0,01768 | -1,07 | -2,10 | 0,00156 | ---             | MFNG         |
| 8075924 | -1,44 | -2,72 | 0,01554 | -1,20 | -2,29 | 0,03166 | NM_002405       | ---          |
| 8055965 | -1,44 | -2,72 | 0,02490 | -1,34 | -2,54 | 0,02129 | ---             | ---          |
| 8098688 | -1,44 | -2,72 | 0,03097 | -0,90 | -1,87 | 0,00513 | ---             | TDRD10       |
| 7905801 | -1,44 | -2,72 | 0,03543 | -2,17 | -4,49 | 0,00627 | NM_001098475    | MYO1F        |
| 8033605 | -1,44 | -2,72 | 0,00855 | -1,17 | -2,25 | 0,01785 | NM_012335       | ANGPTL6      |
| 8033892 | -1,44 | -2,72 | 0,00028 | -1,02 | -2,02 | 0,00670 | NM_031917       | ---          |
| 8042464 | -1,44 | -2,72 | 0,00154 | -1,03 | -2,04 | 0,00029 | ---             | ---          |
| 8170210 | -1,44 | -2,72 | 0,01510 | -1,92 | -3,79 | 0,00124 | ---             | LRRCS5       |
| 7940002 | -1,44 | -2,72 | 0,04882 | -1,75 | -3,37 | 0,00173 | NM_001005210    | GPR37L1      |
| 7908812 | -1,44 | -2,72 | 0,04805 | -1,53 | -2,90 | 0,00499 | NM_004767       | GPRC5D       |
| 7961386 | -1,44 | -2,72 | 0,01797 | -1,43 | -2,69 | 0,00068 | NM_018654       | ---          |
| 8144569 | -1,44 | -2,72 | 0,29184 | -1,10 | -2,14 | 0,09880 | ---             | FAM43B       |
| 7898653 | -1,44 | -2,72 | 0,04354 | -1,51 | -2,85 | 0,01049 | NM_207334       | GNRHR        |
| 8100655 | -1,44 | -2,72 | 0,00666 | -1,36 | -2,57 | 0,00218 | NM_000406       | DISP2        |
| 7982703 | -1,44 | -2,72 | 0,03602 | -1,33 | -2,51 | 0,04858 | NM_033510       | ---          |
| 8144949 | -1,44 | -2,72 | 0,13325 | -1,51 | -2,84 | 0,00481 | ---             | LUC7L3       |
| 8016733 | -1,44 | -2,72 | 0,12680 | -1,92 | -3,79 | 0,01052 | NM_016424       | C17orf51     |
| 8013515 | -1,44 | -2,72 | 0,04437 | -1,06 | -2,08 | 0,01020 | NM_001113434    | SLC35D3      |
| 8122256 | -1,45 | -2,72 | 0,00489 | -1,55 | -2,93 | 0,03990 | NM_001008783    | LOC400968    |
| 7981777 | -1,45 | -2,72 | 0,18022 | -2,22 | -4,64 | 0,00038 | AK127783        | C2orf58      |
| 8041536 | -1,45 | -2,72 | 0,00262 | -0,93 | -1,91 | 0,03100 | NR_027252       | OTOF         |
| 8050942 | -1,45 | -2,72 | 0,00397 | -1,11 | -2,16 | 0,00225 | NM_194248       | ---          |
| 8155325 | -1,45 | -2,72 | 0,02027 | -1,10 | -2,14 | 0,01635 | ---             | POU3F3       |
| 8044109 | -1,45 | -2,72 | 0,07197 | -1,86 | -3,63 | 0,01011 | NM_006236       | TIGD4        |
| 8103235 | -1,45 | -2,73 | 0,00275 | -1,04 | -2,05 | 0,04214 | NM_145720       | EFCAB6       |
| 8076612 | -1,45 | -2,73 | 0,00205 | -0,76 | -1,69 | 0,01089 | NM_022785       | ZFP57        |
| 8124684 | -1,45 | -2,73 | 0,00746 | -1,44 | -2,72 | 0,03762 | NM_001109809    | VANGL2       |
| 7906602 | -1,45 | -2,73 | 0,03816 | -0,33 | -1,26 | 0,35895 | NM_020335       | SPDYE8P      |
| 8133571 | -1,45 | -2,73 | 0,16160 | -2,71 | -6,54 | 0,00034 | NR_003664       | LOC100130174 |
| 7979876 | -1,45 | -2,73 | 0,00799 | -1,89 | -3,70 | 0,01503 | ENST00000413777 | TMEM30B      |
| 7979524 | -1,45 | -2,73 | 0,00237 | 0,48  | 1,40  | 0,43859 | NM_001017970    | ---          |
| 8060803 | -1,45 | -2,73 | 0,01278 | -1,60 | -3,04 | 0,00178 | ---             | FOXC1        |
| 8116591 | -1,45 | -2,73 | 0,06509 | -1,13 | -2,18 | 0,03022 | NM_001453       | TAL1         |
| 7915919 | -1,45 | -2,73 | 0,01340 | -1,11 | -2,16 | 0,01821 | NM_003189       | ---          |
| 7998414 | -1,45 | -2,73 | 0,06937 | -1,87 | -3,66 | 0,00455 | ---             | ---          |
| 8020493 | -1,45 | -2,73 | 0,01577 | -1,71 | -3,27 | 0,00629 | ---             | PEG3         |
| 8039607 | -1,45 | -2,73 | 0,04667 | -1,36 | -2,57 | 0,00329 | NM_006210       | SCAF1        |
| 8030416 | -1,45 | -2,73 | 0,03846 | -1,22 | -2,33 | 0,00258 | NM_021228       | TEX13A       |
| 8174297 | -1,45 | -2,73 | 0,00582 | -2,16 | -4,46 | 0,01057 | NM_031274       | LRP3         |
| 8027556 | -1,45 | -2,73 | 0,01217 | -0,10 | -1,07 | 0,80551 | NM_002333       | MIR221       |
| 8172266 | -1,45 | -2,73 | 0,00688 | -1,10 | -2,15 | 0,00616 | NR_029635       | IRX5         |

|         |       |       |         |       |       |         |                  |             |
|---------|-------|-------|---------|-------|-------|---------|------------------|-------------|
| 7995668 | -1,45 | -2,73 | 0,01396 | -1,68 | -3,20 | 0,00682 | NM_005853        | CCDC140     |
| 8048707 | -1,45 | -2,73 | 0,00650 | -1,52 | -2,87 | 0,05290 | NM_153038        | ---         |
| 8162848 | -1,45 | -2,73 | 0,01083 | -0,79 | -1,73 | 0,00716 | ---              | NOL3        |
| 7996448 | -1,45 | -2,73 | 0,06970 | -0,12 | -1,09 | 0,82784 | NM_003946        | MIR133B     |
| 8120208 | -1,45 | -2,73 | 0,00579 | -1,17 | -2,26 | 0,00677 | NR_029903        | ---         |
| 7977016 | -1,45 | -2,73 | 0,00784 | -0,53 | -1,45 | 0,01406 | ---              | ---         |
| 7984014 | -1,45 | -2,74 | 0,10454 | -2,44 | -5,41 | 0,00033 | ---              | PTPN7       |
| 7923406 | -1,45 | -2,74 | 0,05258 | -1,23 | -2,35 | 0,05731 | NM_080588        | MEF2B       |
| 8035612 | -1,45 | -2,74 | 0,00684 | -1,11 | -2,15 | 0,02399 | NM_001145785     | ---         |
| 8022799 | -1,45 | -2,74 | 0,00190 | -2,02 | -4,06 | 0,00219 | ---              | AURKAIP1    |
| 8039923 | -1,45 | -2,74 | 0,00347 | -1,14 | -2,20 | 0,00165 | NM_017900        | FAM138A     |
| 8159803 | -1,45 | -2,74 | 0,19281 | -2,36 | -5,15 | 0,01386 | NR_026818        | KIR2DL5A    |
| 8039884 | -1,45 | -2,74 | 0,00929 | -1,38 | -2,60 | 0,02125 | NM_020535        | ---         |
| 7919047 | -1,45 | -2,74 | 0,00383 | -2,07 | -4,21 | 0,00034 | ---              | C6orf195    |
| 8123579 | -1,45 | -2,74 | 0,01454 | -1,24 | -2,36 | 0,03996 | NM_152554        | WNT7A       |
| 8085475 | -1,45 | -2,74 | 0,06476 | -0,46 | -1,37 | 0,29585 | NM_004625        | TAS1R2      |
| 7912968 | -1,45 | -2,74 | 0,03326 | -1,35 | -2,54 | 0,08861 | NM_152232        | LCN12       |
| 8159501 | -1,45 | -2,74 | 0,03022 | -0,62 | -1,53 | 0,06655 | NM_178536        | ---         |
| 8090936 | -1,45 | -2,74 | 0,01006 | -1,81 | -3,50 | 0,01709 | ---              | AHSP        |
| 7995237 | -1,45 | -2,74 | 0,00892 | -1,36 | -2,57 | 0,01017 | NM_016633        | CRTAC1      |
| 7935535 | -1,45 | -2,74 | 0,00538 | -1,41 | -2,66 | 0,01593 | NM_018058        | MIR149      |
| 8049682 | -1,45 | -2,74 | 0,12709 | -2,48 | -5,59 | 0,00411 | NR_029702        | CA7         |
| 7996331 | -1,45 | -2,74 | 0,00825 | -0,98 | -1,98 | 0,00473 | NM_005182        | SLC25A18    |
| 8071107 | -1,45 | -2,74 | 0,04802 | -1,10 | -2,15 | 0,04160 | NM_031481        | C9orf131    |
| 8160912 | -1,45 | -2,74 | 0,01120 | -1,76 | -3,38 | 0,00019 | NM_203299        | TBKBP1      |
| 8008016 | -1,45 | -2,74 | 0,07211 | -1,22 | -2,33 | 0,05173 | NM_014726        | GPRIN1      |
| 8115941 | -1,45 | -2,74 | 0,01087 | -1,24 | -2,36 | 0,00352 | NM_052899        | SPIB        |
| 8030671 | -1,45 | -2,74 | 0,07104 | -1,59 | -3,01 | 0,00311 | NM_003121        | FAM47C      |
| 8166703 | -1,45 | -2,74 | 0,02628 | -0,85 | -1,81 | 0,16997 | NM_001013736     | SLC25A2     |
| 8114647 | -1,45 | -2,74 | 0,10886 | -1,25 | -2,38 | 0,10818 | NM_031947        | RAB40A      |
| 8174246 | -1,45 | -2,74 | 0,01209 | -1,24 | -2,36 | 0,02366 | NM_080879        | ---         |
| 7983761 | -1,45 | -2,74 | 0,01231 | -1,27 | -2,42 | 0,00019 | ---              | ---         |
| 7996258 | -1,46 | -2,74 | 0,00104 | -1,28 | -2,44 | 0,02599 | ---              | WBSCR17     |
| 8139917 | -1,46 | -2,74 | 0,15379 | -0,99 | -1,98 | 0,12010 | NM_022479        | ---         |
| 8138084 | -1,46 | -2,74 | 0,02472 | -1,93 | -3,80 | 0,00558 | ---              | NKX2-8      |
| 7978686 | -1,46 | -2,74 | 0,02732 | -0,56 | -1,47 | 0,02972 | NM_014360        | EPX         |
| 8008723 | -1,46 | -2,74 | 0,00350 | -1,99 | -3,97 | 0,00064 | NM_000502        | ---         |
| 7975694 | -1,46 | -2,74 | 0,00393 | -0,68 | -1,61 | 0,01739 | ---              | NAGS        |
| 8007550 | -1,46 | -2,74 | 0,08479 | -0,55 | -1,47 | 0,29042 | NM_153006        | MIR152      |
| 8016400 | -1,46 | -2,75 | 0,00669 | -1,14 | -2,20 | 0,00643 | NR_029687        | SHANK1      |
| 8038598 | -1,46 | -2,75 | 0,01850 | -1,72 | -3,29 | 0,00211 | NM_016148        | CDK3        |
| 8010021 | -1,46 | -2,75 | 0,02065 | -0,67 | -1,59 | 0,17499 | NM_001258        | HCG4        |
| 8124689 | -1,46 | -2,75 | 0,06994 | -0,31 | -1,24 | 0,53546 | NR_002139        | FLJ38576    |
| 8104072 | -1,46 | -2,75 | 0,05008 | -1,26 | -2,40 | 0,13063 | ENST000000423304 | CYP4F11     |
| 8035095 | -1,46 | -2,75 | 0,01165 | 0,22  | 1,17  | 0,59180 | NM_021187        | COL2A1      |
| 7962703 | -1,46 | -2,75 | 0,00376 | -1,71 | -3,28 | 0,00388 | NM_001844        | C5orf40     |
| 8115487 | -1,46 | -2,75 | 0,01834 | -1,50 | -2,82 | 0,07802 | NM_001001343     | DGKG        |
| 8092596 | -1,46 | -2,75 | 0,00377 | -0,64 | -1,56 | 0,29912 | NM_001346        | TBXA2R      |
| 8032623 | -1,46 | -2,75 | 0,04351 | -0,95 | -1,93 | 0,03162 | NM_001060        | CARNS1      |
| 7941890 | -1,46 | -2,75 | 0,05271 | -0,94 | -1,92 | 0,02688 | NM_001166222     | SLC29A2     |
| 7949619 | -1,46 | -2,75 | 0,03795 | 3,34  | 10,14 | 0,00015 | NM_001532        | KRTAP5-1    |
| 7937698 | -1,46 | -2,75 | 0,03740 | -2,04 | -4,12 | 0,00237 | NM_001005922     | COL19A1     |
| 8120501 | -1,46 | -2,75 | 0,01645 | -1,32 | -2,49 | 0,00001 | NM_001858        | ---         |
| 7910188 | -1,46 | -2,75 | 0,01019 | -1,07 | -2,10 | 0,00206 | ---              | hCG_2011852 |
| 7972672 | -1,46 | -2,75 | 0,00657 | -2,07 | -4,19 | 0,00485 | ENST000000322527 | CNTD2       |
| 8036835 | -1,46 | -2,75 | 0,04364 | -1,36 | -2,57 | 0,04668 | NM_024877        | TMPRSS11E   |
| 8095364 | -1,46 | -2,75 | 0,00194 | -1,91 | -3,75 | 0,00003 | NM_014058        | ---         |
| 7907211 | -1,46 | -2,75 | 0,10595 | -2,82 | -7,08 | 0,00005 | ---              | ARHGEF19    |
| 7912724 | -1,46 | -2,75 | 0,03446 | -0,74 | -1,67 | 0,11801 | NM_153213        | CYP4F12     |
| 8026468 | -1,46 | -2,75 | 0,03638 | -1,24 | -2,36 | 0,02374 | NM_023944        | FSTL4       |
| 8114119 | -1,46 | -2,75 | 0,00454 | -0,92 | -1,89 | 0,01485 | NM_015082        | C17orf105   |
| 8007530 | -1,46 | -2,75 | 0,00409 | -0,71 | -1,64 | 0,14888 | AK125817         | ---         |
| 7981909 | -1,46 | -2,75 | 0,08138 | -1,73 | -3,33 | 0,07644 | ---              | ---         |
| 8043478 | -1,46 | -2,75 | 0,06895 | -1,39 | -2,62 | 0,01076 | ---              | PRR23A      |
| 8091037 | -1,46 | -2,75 | 0,12911 | -2,25 | -4,77 | 0,00014 | NM_001134659     | FOXD3       |
| 7901913 | -1,46 | -2,75 | 0,09459 | -0,68 | -1,60 | 0,04889 | NM_012183        | NUDT22      |
| 7940884 | -1,46 | -2,76 | 0,01063 | -0,78 | -1,72 | 0,03479 | NM_032344        | ---         |
| 8140498 | -1,46 | -2,76 | 0,00033 | -1,50 | -2,83 | 0,00080 | ---              | SORBS3      |
| 8145151 | -1,46 | -2,76 | 0,01501 | -0,17 | -1,13 | 0,61408 | NM_005775        | ---         |
| 7993369 | -1,46 | -2,76 | 0,04260 | -1,60 | -3,02 | 0,03782 | ---              | KIAA1875    |
| 8148748 | -1,46 | -2,76 | 0,00296 | -1,00 | -2,00 | 0,05337 | NR_024207        | MSH5        |
| 8118293 | -1,46 | -2,76 | 0,01503 | -0,72 | -1,65 | 0,09205 | NM_025259        | GJB4        |
| 7899927 | -1,46 | -2,76 | 0,00277 | -2,05 | -4,13 | 0,00110 | NM_153212        | C6orf123    |

|         |       |       |         |       |       |         |                 |           |
|---------|-------|-------|---------|-------|-------|---------|-----------------|-----------|
| 8123405 | -1,46 | -2,76 | 0,03693 | -1,74 | -3,34 | 0,00047 | AB016901        | KLK8      |
| 8038707 | -1,46 | -2,76 | 0,04821 | -1,69 | -3,23 | 0,03155 | NM_144505       | C1orf111  |
| 7921895 | -1,46 | -2,76 | 0,01152 | -2,05 | -4,15 | 0,00304 | NM_182581       | MEFV      |
| 7998940 | -1,46 | -2,76 | 0,00002 | -1,19 | -2,28 | 0,03641 | NM_000243       | AIFM3     |
| 8071444 | -1,46 | -2,76 | 0,04568 | -0,36 | -1,28 | 0,21741 | NM_144704       | ---       |
| 7990806 | -1,46 | -2,76 | 0,00212 | -0,55 | -1,46 | 0,11559 | ---             | DMRTB1    |
| 7901557 | -1,46 | -2,76 | 0,10297 | -2,19 | -4,55 | 0,00075 | NM_033067       | CYP26C1   |
| 7929315 | -1,46 | -2,76 | 0,06247 | -1,20 | -2,30 | 0,00092 | NM_183374       | ZNF696    |
| 8148615 | -1,46 | -2,76 | 0,00340 | -1,25 | -2,37 | 0,00637 | NM_030895       | EPHA10    |
| 7915078 | -1,46 | -2,76 | 0,00929 | -0,54 | -1,45 | 0,18700 | NM_173641       | RPSAP58   |
| 8027354 | -1,47 | -2,76 | 0,00656 | 0,21  | 1,15  | 0,71275 | NR_003662       | SNORA48   |
| 8004506 | -1,47 | -2,76 | 0,08976 | -1,14 | -2,21 | 0,11089 | NR_002918       | ---       |
| 7905256 | -1,47 | -2,76 | 0,06535 | -0,86 | -1,82 | 0,14636 | ---             | BSX       |
| 7952321 | -1,47 | -2,76 | 0,09958 | -1,83 | -3,55 | 0,07437 | NM_001098169    | ---       |
| 8098938 | -1,47 | -2,76 | 0,02920 | -1,24 | -2,36 | 0,06683 | ---             | TEPP      |
| 7996164 | -1,47 | -2,76 | 0,01210 | -1,57 | -2,97 | 0,04077 | NM_199046       | CALHM3    |
| 7936111 | -1,47 | -2,76 | 0,00524 | -1,72 | -3,29 | 0,01400 | NM_001129742    | FAM179A   |
| 8041172 | -1,47 | -2,76 | 0,00660 | -1,08 | -2,11 | 0,00038 | NM_199280       | IGFL2     |
| 8029773 | -1,47 | -2,76 | 0,02973 | -1,56 | -2,96 | 0,06850 | NM_001002915    | CTXN1     |
| 8033462 | -1,47 | -2,77 | 0,00475 | -0,95 | -1,93 | 0,19787 | NM_206833       | HS6ST1    |
| 7898677 | -1,47 | -2,77 | 0,00267 | -0,36 | -1,28 | 0,51678 | NM_004807       | NOXA1     |
| 8159670 | -1,47 | -2,77 | 0,00604 | -1,01 | -2,01 | 0,04239 | NM_006647       | ---       |
| 8150151 | -1,47 | -2,77 | 0,00077 | -1,78 | -3,43 | 0,00544 | ---             | GGT5      |
| 8074991 | -1,47 | -2,77 | 0,05898 | -0,56 | -1,47 | 0,28933 | NM_001099781    | MYLPF     |
| 7994804 | -1,47 | -2,77 | 0,00004 | -1,67 | -3,18 | 0,00609 | NM_013292       | MIR182    |
| 8142880 | -1,47 | -2,77 | 0,04130 | -1,37 | -2,58 | 0,00440 | NR_029614       | ---       |
| 7928821 | -1,47 | -2,77 | 0,00169 | -1,62 | -3,08 | 0,00132 | ---             | ---       |
| 8152595 | -1,47 | -2,77 | 0,13339 | -2,01 | -4,03 | 0,00396 | ---             | LOC283314 |
| 7953622 | -1,47 | -2,77 | 0,01621 | -0,67 | -1,59 | 0,08041 | AY358730        | FBXO44    |
| 7897714 | -1,47 | -2,77 | 0,00809 | 0,49  | 1,40  | 0,27414 | NM_001014765    | KCNH3     |
| 7955231 | -1,47 | -2,77 | 0,00939 | -1,08 | -2,11 | 0,11342 | NM_012284       | RPL23AP32 |
| 8042038 | -1,47 | -2,77 | 0,03878 | -2,04 | -4,11 | 0,02504 | NR_002229       | TYW1      |
| 8133202 | -1,47 | -2,77 | 0,09338 | 0,36  | 1,29  | 0,11389 | NM_018264       | TSSK3     |
| 7899790 | -1,47 | -2,77 | 0,00965 | -1,00 | -2,01 | 0,00729 | NM_052841       | TPO       |
| 8039996 | -1,47 | -2,77 | 0,06432 | -1,23 | -2,34 | 0,00217 | NM_000547       | RAB43     |
| 8090529 | -1,47 | -2,77 | 0,05339 | -0,43 | -1,35 | 0,68991 | NM_198490       | ---       |
| 7939296 | -1,47 | -2,77 | 0,00668 | -1,54 | -2,92 | 0,01264 | ---             | PNOC      |
| 8145603 | -1,47 | -2,77 | 0,03397 | -1,53 | -2,90 | 0,00155 | NM_006228       | GIMAP1    |
| 8137252 | -1,47 | -2,77 | 0,00686 | -1,06 | -2,08 | 0,05634 | NM_130759       | GPATCH4   |
| 7906194 | -1,47 | -2,77 | 0,05287 | 0,35  | 1,28  | 0,48493 | AK055377        | ---       |
| 8000634 | -1,47 | -2,77 | 0,03247 | -0,66 | -1,59 | 0,16139 | ---             | ---       |
| 8103644 | -1,47 | -2,77 | 0,07496 | -2,06 | -4,17 | 0,01680 | ---             | C20orf85  |
| 8063601 | -1,47 | -2,77 | 0,00576 | -1,37 | -2,58 | 0,00102 | NM_178456       | KLRG2     |
| 8143296 | -1,47 | -2,77 | 0,00982 | -0,99 | -1,99 | 0,09883 | NM_198508       | ---       |
| 8121683 | -1,47 | -2,77 | 0,00330 | -1,79 | -3,46 | 0,02946 | ---             | ---       |
| 7981486 | -1,47 | -2,77 | 0,00311 | -1,16 | -2,23 | 0,00374 | ---             | TRIM43    |
| 8053787 | -1,47 | -2,77 | 0,04628 | -1,79 | -3,45 | 0,00107 | NM_138800       | RINL      |
| 8036622 | -1,47 | -2,77 | 0,04345 | -1,09 | -2,12 | 0,07386 | NM_198445       | ---       |
| 8139019 | -1,47 | -2,77 | 0,01478 | -1,22 | -2,33 | 0,00648 | ---             | MYADML2   |
| 8019331 | -1,47 | -2,77 | 0,00707 | -1,46 | -2,76 | 0,00121 | NM_001145113    | SHOX2     |
| 8091698 | -1,47 | -2,77 | 0,01275 | -1,22 | -2,33 | 0,00010 | NM_003030       | MAPK4     |
| 8021199 | -1,47 | -2,77 | 0,04124 | -0,95 | -1,94 | 0,00745 | NM_002747       | P2RY8     |
| 8171136 | -1,47 | -2,77 | 0,00707 | -1,72 | -3,30 | 0,00264 | NM_178129       | P2RY8     |
| 8177026 | -1,47 | -2,77 | 0,00707 | -1,72 | -3,30 | 0,00264 | NM_178129       | SFTPA2    |
| 7934698 | -1,47 | -2,77 | 0,04199 | -1,12 | -2,17 | 0,00019 | NM_001098668    | SFTPA2    |
| 7934708 | -1,47 | -2,77 | 0,04199 | -1,12 | -2,17 | 0,00019 | NM_001098668    | ASIP      |
| 8061982 | -1,47 | -2,77 | 0,01522 | -1,83 | -3,54 | 0,00164 | NM_001672       | LOC652904 |
| 8166630 | -1,47 | -2,77 | 0,12001 | -2,33 | -5,03 | 0,00017 | ENST00000378958 | C20orf71  |
| 8061869 | -1,47 | -2,77 | 0,05170 | -1,75 | -3,37 | 0,00307 | NM_178466       | KLK11     |
| 8038735 | -1,47 | -2,77 | 0,00999 | -1,49 | -2,81 | 0,17328 | NM_144947       | ---       |
| 7991157 | -1,47 | -2,77 | 0,05913 | -1,31 | -2,48 | 0,03251 | ---             | MBL1P     |
| 7928661 | -1,47 | -2,77 | 0,09426 | -0,25 | -1,19 | 0,35737 | NR_002724       | CACNA1G   |
| 8008409 | -1,47 | -2,78 | 0,03173 | -0,76 | -1,69 | 0,05710 | NM_018896       | LRR38     |
| 7912622 | -1,47 | -2,78 | 0,00708 | -1,12 | -2,17 | 0,00576 | ENST00000376085 | NCR3      |
| 8124955 | -1,47 | -2,78 | 0,00151 | -1,48 | -2,79 | 0,04338 | NM_001145466    | NCR3      |
| 8178517 | -1,47 | -2,78 | 0,00151 | -1,48 | -2,79 | 0,04338 | NM_001145466    | NCR3      |
| 8179773 | -1,47 | -2,78 | 0,00151 | -1,48 | -2,79 | 0,04338 | NM_001145466    | PRAMEF7   |
| 7897991 | -1,47 | -2,78 | 0,03515 | -2,09 | -4,24 | 0,00722 | NM_001012277    | PRAMEF7   |
| 7912591 | -1,47 | -2,78 | 0,03515 | -2,09 | -4,24 | 0,00722 | NM_001012277    | PRAMEF7   |
| 7912606 | -1,47 | -2,78 | 0,03515 | -2,09 | -4,24 | 0,00722 | NM_001012277    | KIR2DS5   |
| 8039892 | -1,47 | -2,78 | 0,01440 | -0,91 | -1,88 | 0,17590 | NM_014513       | FAM83B    |
| 8120335 | -1,47 | -2,78 | 0,00438 | 1,28  | 2,43  | 0,01144 | NM_001010872    | ---       |
| 8052696 | -1,47 | -2,78 | 0,00761 | -1,42 | -2,67 | 0,02540 | ---             | LILRB2    |

|         |       |       |         |       |       |         |                 |           |
|---------|-------|-------|---------|-------|-------|---------|-----------------|-----------|
| 8039212 | -1,47 | -2,78 | 0,02540 | -1,98 | -3,94 | 0,00006 | NM_005874       | C5orf55   |
| 8110681 | -1,47 | -2,78 | 0,00382 | -1,18 | -2,27 | 0,01571 | NM_138464       | E2F2      |
| 7913644 | -1,48 | -2,78 | 0,02106 | -0,09 | -1,06 | 0,44778 | NM_004091       | ---       |
| 7939422 | -1,48 | -2,78 | 0,01259 | -2,42 | -5,35 | 0,00049 | ---             | ---       |
| 7967622 | -1,48 | -2,78 | 0,08384 | -2,58 | -5,99 | 0,00019 | ---             | OR13G1    |
| 7925726 | -1,48 | -2,78 | 0,00664 | -1,62 | -3,07 | 0,00291 | NM_001005487    | HYAL1     |
| 8087611 | -1,48 | -2,78 | 0,00955 | 0,68  | 1,60  | 0,15609 | NM_007312       | ---       |
| 7916227 | -1,48 | -2,78 | 0,01663 | -0,95 | -1,93 | 0,00348 | ---             | ATXN7L2   |
| 7903676 | -1,48 | -2,78 | 0,03458 | -0,68 | -1,60 | 0,23728 | NM_153340       | TNFAIP8L1 |
| 8024885 | -1,48 | -2,78 | 0,01124 | -0,04 | -1,03 | 0,94416 | NM_152362       | GPR142    |
| 8009631 | -1,48 | -2,78 | 0,00437 | -1,55 | -2,92 | 0,01186 | NM_181790       | C21orf89  |
| 8069200 | -1,48 | -2,79 | 0,00316 | -0,62 | -1,53 | 0,04359 | AF426268        | ---       |
| 7917002 | -1,48 | -2,79 | 0,12979 | -2,61 | -6,10 | 0,00493 | ---             | DUSP5P    |
| 7910381 | -1,48 | -2,79 | 0,05856 | -1,62 | -3,08 | 0,05509 | AK055963        | SAC3D1    |
| 7941122 | -1,48 | -2,79 | 0,00488 | -1,44 | -2,71 | 0,01002 | NM_013299       | SCARNA6   |
| 8049299 | -1,48 | -2,79 | 0,01086 | -0,47 | -1,38 | 0,15240 | NR_003006       | OPCML     |
| 7952785 | -1,48 | -2,79 | 0,04410 | -1,19 | -2,29 | 0,00259 | NM_001012393    | MDK       |
| 7939665 | -1,48 | -2,79 | 0,02245 | -0,11 | -1,08 | 0,83757 | NM_001012334    | C11orf89  |
| 7945678 | -1,48 | -2,79 | 0,01620 | -1,18 | -2,26 | 0,07877 | ENST00000391480 | ---       |
| 8048885 | -1,48 | -2,79 | 0,04843 | -1,33 | -2,51 | 0,00370 | ---             | SLC35F3   |
| 7910618 | -1,48 | -2,79 | 0,04663 | 0,31  | 1,24  | 0,22203 | NM_173508       | KLHL17    |
| 7896779 | -1,48 | -2,79 | 0,00810 | -1,55 | -2,93 | 0,00347 | NM_198317       | P2RY2     |
| 7942400 | -1,48 | -2,79 | 0,05172 | -0,24 | -1,18 | 0,63891 | NM_176072       | ---       |
| 7972053 | -1,48 | -2,79 | 0,06509 | -1,47 | -2,77 | 0,03417 | ---             | IFNW1     |
| 8160365 | -1,48 | -2,79 | 0,00047 | -1,52 | -2,87 | 0,05033 | NM_002177       | SPDYE2    |
| 8135204 | -1,48 | -2,79 | 0,23542 | -2,41 | -5,30 | 0,00132 | NM_001031618    | ---       |
| 8085579 | -1,48 | -2,79 | 0,11682 | -1,78 | -3,43 | 0,04506 | ---             | FLT1      |
| 7970763 | -1,48 | -2,79 | 0,02301 | -1,18 | -2,27 | 0,00360 | NM_002019       | CCDC88B   |
| 7941004 | -1,48 | -2,79 | 0,00617 | -1,26 | -2,40 | 0,04942 | NM_032251       | WBP2NL    |
| 8073562 | -1,48 | -2,79 | 0,03337 | -1,24 | -2,36 | 0,00302 | NM_152613       | ---       |
| 8165458 | -1,48 | -2,79 | 0,05986 | -2,73 | -6,63 | 0,00028 | ---             | ---       |
| 8117578 | -1,48 | -2,79 | 0,00535 | -1,06 | -2,08 | 0,00111 | ---             | FFAR3     |
| 8027860 | -1,48 | -2,79 | 0,04954 | -1,45 | -2,74 | 0,01842 | NM_005304       | ---       |
| 8071161 | -1,48 | -2,79 | 0,19051 | -2,70 | -6,48 | 0,00516 | ---             | LMO1      |
| 7946354 | -1,48 | -2,79 | 0,01577 | -1,20 | -2,30 | 0,00511 | NM_002315       | PSG8      |
| 8037236 | -1,48 | -2,79 | 0,29276 | -0,91 | -1,88 | 0,18762 | NM_182707       | TUBB4Q    |
| 8003576 | -1,48 | -2,79 | 0,00183 | -1,34 | -2,54 | 0,00106 | NM_020040       | FAM26F    |
| 8121596 | -1,48 | -2,79 | 0,00935 | -1,34 | -2,53 | 0,00011 | BC146842        | TMPRSS9   |
| 8024467 | -1,48 | -2,80 | 0,02752 | -0,92 | -1,89 | 0,01377 | NM_182973       | ---       |
| 8152640 | -1,48 | -2,80 | 0,02028 | -1,31 | -2,48 | 0,02309 | ---             | DYNLRB2   |
| 7997374 | -1,48 | -2,80 | 0,02617 | -1,07 | -2,09 | 0,01310 | NM_130897       | DSCR6     |
| 8068512 | -1,48 | -2,80 | 0,01737 | -0,90 | -1,87 | 0,00372 | NM_018962       | WDR4      |
| 8070615 | -1,48 | -2,80 | 0,04863 | -0,51 | -1,42 | 0,49838 | NM_018669       | ---       |
| 8070081 | -1,48 | -2,80 | 0,03257 | -1,48 | -2,78 | 0,00418 | ---             | GIF       |
| 7948433 | -1,48 | -2,80 | 0,02416 | -0,93 | -1,90 | 0,00651 | NM_005142       | C10orf91  |
| 7931473 | -1,48 | -2,80 | 0,01396 | -1,10 | -2,15 | 0,00071 | NM_173541       | TIE1      |
| 7900658 | -1,48 | -2,80 | 0,05658 | -1,15 | -2,22 | 0,01769 | NM_005424       | PIP5K1L   |
| 8164328 | -1,48 | -2,80 | 0,01962 | -0,23 | -1,18 | 0,59001 | NM_173492       | DENND1C   |
| 8033207 | -1,48 | -2,80 | 0,08444 | -0,40 | -1,32 | 0,24790 | NM_024898       | ---       |
| 8015014 | -1,48 | -2,80 | 0,00566 | -1,34 | -2,54 | 0,00065 | ---             | SPINT2    |
| 8028311 | -1,49 | -2,80 | 0,03232 | 2,09  | 4,24  | 0,00342 | NM_021102       | KIRREL2   |
| 8028058 | -1,49 | -2,80 | 0,09861 | -0,82 | -1,76 | 0,00024 | NM_199180       | KHST14    |
| 7982745 | -1,49 | -2,80 | 0,00006 | -1,81 | -3,50 | 0,02050 | NM_130468       | ---       |
| 8028158 | -1,49 | -2,80 | 0,04714 | -0,99 | -1,98 | 0,06722 | ---             | ---       |
| 8168203 | -1,49 | -2,80 | 0,00685 | -1,18 | -2,27 | 0,00037 | ---             | ADRA2C    |
| 8093826 | -1,49 | -2,80 | 0,01189 | -0,39 | -1,31 | 0,49164 | NM_000683       | FLRT1     |
| 7940851 | -1,49 | -2,80 | 0,00617 | -0,78 | -1,72 | 0,10496 | NM_013280       | OR10D3P   |
| 7944827 | -1,49 | -2,80 | 0,01700 | -0,53 | -1,45 | 0,02193 | ENST00000318666 | C8orf73   |
| 8153426 | -1,49 | -2,80 | 0,07795 | -0,16 | -1,12 | 0,90719 | NM_001100878    | GP5       |
| 8092845 | -1,49 | -2,80 | 0,02300 | -1,52 | -2,87 | 0,02976 | NM_004488       | GATA5     |
| 8067521 | -1,49 | -2,80 | 0,04698 | -1,60 | -3,04 | 0,00024 | NM_080473       | SPI1      |
| 7947861 | -1,49 | -2,80 | 0,08723 | -1,69 | -3,22 | 0,00092 | NM_001080547    | TPSAB1    |
| 7992181 | -1,49 | -2,80 | 0,04979 | -2,59 | -6,03 | 0,00037 | NM_003294       | C1QL4     |
| 7963061 | -1,49 | -2,80 | 0,01692 | -0,07 | -1,05 | 0,60281 | NM_001008223    | CXXC1     |
| 8023344 | -1,49 | -2,80 | 0,00080 | -0,96 | -1,94 | 0,13170 | NM_001101654    | DENND2C   |
| 7918792 | -1,49 | -2,80 | 0,00879 | -1,67 | -3,18 | 0,02011 | BC063894        | ---       |
| 8086878 | -1,49 | -2,80 | 0,00525 | -1,66 | -3,17 | 0,02310 | ---             | ZNF467    |
| 8143749 | -1,49 | -2,80 | 0,00654 | -0,94 | -1,92 | 0,10611 | NM_207336       | MIR495    |
| 7976836 | -1,49 | -2,80 | 0,00169 | -1,87 | -3,66 | 0,00212 | NR_030175       | ENHO      |
| 8160816 | -1,49 | -2,80 | 0,00430 | -1,49 | -2,81 | 0,00206 | NM_198573       | WNT6      |
| 8048445 | -1,49 | -2,81 | 0,01533 | -1,74 | -3,35 | 0,01509 | NM_006522       | GPT       |
| 8148902 | -1,49 | -2,81 | 0,00348 | -0,49 | -1,41 | 0,24159 | NM_005309       | ---       |
| 8130209 | -1,49 | -2,81 | 0,01907 | -1,48 | -2,78 | 0,09060 | ---             | PTPN20A   |

|         |       |       |         |       |        |         |                 |              |
|---------|-------|-------|---------|-------|--------|---------|-----------------|--------------|
| 7933442 | -1,49 | -2,81 | 0,14428 | 0,38  | 1,31   | 0,20696 | NM_001042389    | C10orf35     |
| 7928064 | -1,49 | -2,81 | 0,03047 | 0,19  | 1,14   | 0,40574 | NM_145306       | ---          |
| 7947526 | -1,49 | -2,81 | 0,04946 | -1,36 | -2,56  | 0,00017 | ---             | ---          |
| 8005233 | -1,49 | -2,81 | 0,01121 | -1,57 | -2,98  | 0,08490 | ---             | ---          |
| 8152551 | -1,49 | -2,81 | 0,00361 | -0,94 | -1,92  | 0,02297 | ---             | LOC642452    |
| 7997861 | -1,49 | -2,81 | 0,00557 | -1,02 | -2,03  | 0,10038 | ENST00000452912 | ---          |
| 8155493 | -1,49 | -2,81 | 0,30977 | -4,97 | -31,35 | 0,00021 | ---             | ---          |
| 8155519 | -1,49 | -2,81 | 0,30977 | -4,97 | -31,35 | 0,00021 | ---             | ---          |
| 8155567 | -1,49 | -2,81 | 0,30977 | -4,97 | -31,35 | 0,00021 | ---             | ---          |
| 8161429 | -1,49 | -2,81 | 0,30977 | -4,97 | -31,35 | 0,00021 | ---             | ---          |
| 8161440 | -1,49 | -2,81 | 0,30977 | -4,97 | -31,35 | 0,00021 | ---             | WNT3A        |
| 7910217 | -1,49 | -2,81 | 0,00344 | -1,77 | -3,40  | 0,00037 | NM_033131       | ---          |
| 7948306 | -1,49 | -2,81 | 0,04293 | -1,49 | -2,80  | 0,00383 | ---             | TPTE         |
| 8069472 | -1,49 | -2,81 | 0,02634 | -2,02 | -4,05  | 0,00426 | NM_199261       | ---          |
| 8163253 | -1,49 | -2,81 | 0,00127 | -1,61 | -3,06  | 0,01684 | ---             | OCA2         |
| 7986838 | -1,49 | -2,81 | 0,00380 | -0,43 | -1,35  | 0,13514 | NM_000275       | PPYR1        |
| 7927280 | -1,49 | -2,81 | 0,00448 | -1,20 | -2,29  | 0,00048 | NM_005972       | LOC613266    |
| 8065084 | -1,49 | -2,81 | 0,14671 | -1,69 | -3,22  | 0,13210 | AK125594        | ---          |
| 8053276 | -1,49 | -2,81 | 0,00412 | -1,22 | -2,33  | 0,00349 | ---             | PRRG4        |
| 7939150 | -1,49 | -2,81 | 0,00578 | 0,28  | 1,22   | 0,31390 | NM_024081       | ---          |
| 8067165 | -1,49 | -2,81 | 0,05759 | -1,37 | -2,59  | 0,03605 | ---             | LOC100132167 |
| 8155525 | -1,49 | -2,81 | 0,03393 | -1,44 | -2,72  | 0,03270 | BC006438        | LOC100132167 |
| 8161368 | -1,49 | -2,81 | 0,03393 | -1,44 | -2,72  | 0,03270 | BC006438        | ESPNL        |
| 8049598 | -1,49 | -2,81 | 0,04444 | -2,06 | -4,16  | 0,00026 | NM_194312       | ---          |
| 8136786 | -1,49 | -2,81 | 0,01801 | -1,45 | -2,73  | 0,00048 | ---             | PRR23B       |
| 8091039 | -1,49 | -2,81 | 0,01095 | -2,14 | -4,42  | 0,00027 | NM_001013650    | GP1BA        |
| 8004024 | -1,49 | -2,81 | 0,01187 | -1,20 | -2,29  | 0,00655 | NM_000173       | PRDM11       |
| 7939569 | -1,49 | -2,81 | 0,01994 | -0,67 | -1,59  | 0,06634 | NM_020229       | GPR17        |
| 8045075 | -1,49 | -2,81 | 0,04193 | -1,10 | -2,15  | 0,02837 | NM_001161415    | ---          |
| 8157229 | -1,49 | -2,82 | 0,05296 | -1,89 | -3,70  | 0,00164 | ---             | ZFR2         |
| 8032699 | -1,49 | -2,82 | 0,00440 | -1,35 | -2,56  | 0,00008 | NM_015174       | ---          |
| 8065080 | -1,49 | -2,82 | 0,00066 | -0,66 | -1,58  | 0,06454 | ---             | MCCD1        |
| 8118124 | -1,49 | -2,82 | 0,11044 | -1,80 | -3,49  | 0,01416 | NM_001011700    | SNORD115-25  |
| 7982056 | -1,50 | -2,82 | 0,00661 | -2,27 | -4,83  | 0,00039 | NR_003342       | SH2D2A       |
| 7921144 | -1,50 | -2,82 | 0,10068 | -0,89 | -1,85  | 0,02065 | NM_001161441    | RHBDD3       |
| 8075200 | -1,50 | -2,82 | 0,04917 | -1,67 | -3,19  | 0,00210 | NM_012265       | KRT82        |
| 7963386 | -1,50 | -2,82 | 0,01010 | -2,04 | -4,12  | 0,00161 | NM_033033       | HBII-52-28   |
| 7982062 | -1,50 | -2,82 | 0,05574 | -0,97 | -1,96  | 0,03214 | NR_003497       | SPATA2L      |
| 8003478 | -1,50 | -2,82 | 0,00334 | 0,29  | 1,22   | 0,29496 | NM_152339       | ---          |
| 8169697 | -1,50 | -2,82 | 0,02841 | -0,99 | -1,98  | 0,00537 | ---             | RGS19        |
| 8067802 | -1,50 | -2,82 | 0,03103 | -1,00 | -2,00  | 0,02573 | NM_001039467    | PAX3         |
| 8059301 | -1,50 | -2,82 | 0,02649 | -1,26 | -2,40  | 0,03973 | NM_181458       | KRTAP4-11    |
| 8019699 | -1,50 | -2,82 | 0,07347 | -3,37 | -10,34 | 0,00034 | NM_033059       | KRTAP2-4     |
| 8015214 | -1,50 | -2,83 | 0,00993 | -2,29 | -4,89  | 0,00127 | NM_033184       | KRTAP2-4     |
| 8019574 | -1,50 | -2,83 | 0,00993 | -2,29 | -4,89  | 0,00127 | NM_033184       | TMEM221      |
| 8035311 | -1,50 | -2,83 | 0,06758 | -1,42 | -2,68  | 0,14020 | ENST00000341130 | GUCA2A       |
| 7915404 | -1,50 | -2,83 | 0,01908 | -2,08 | -4,23  | 0,02912 | NM_033553       | ---          |
| 7966223 | -1,50 | -2,83 | 0,01580 | -1,16 | -2,24  | 0,01898 | ---             | CHRNE        |
| 8011734 | -1,50 | -2,83 | 0,02289 | -1,36 | -2,57  | 0,08672 | NM_000080       | MIR453       |
| 7976848 | -1,50 | -2,83 | 0,01065 | -1,38 | -2,60  | 0,01372 | NR_029969       | NKD2         |
| 8104253 | -1,50 | -2,83 | 0,01436 | 0,02  | 1,01   | 0,96887 | NM_033120       | ---          |
| 7910636 | -1,50 | -2,83 | 0,04459 | -3,37 | -10,37 | 0,00201 | ---             | ---          |
| 7956838 | -1,50 | -2,83 | 0,00508 | -1,57 | -2,98  | 0,00571 | ---             | MIR326       |
| 7950490 | -1,50 | -2,83 | 0,02478 | -1,52 | -2,87  | 0,01549 | NR_029891       | GJA3         |
| 7970439 | -1,50 | -2,83 | 0,02827 | -2,21 | -4,62  | 0,02258 | NM_021954       | CALCB        |
| 7938646 | -1,50 | -2,83 | 0,00115 | -1,92 | -3,78  | 0,01539 | NM_000728       | ---          |
| 8042960 | -1,50 | -2,83 | 0,07121 | -1,24 | -2,36  | 0,00238 | ---             | DTX1         |
| 7958931 | -1,50 | -2,83 | 0,04507 | -1,16 | -2,23  | 0,02070 | NM_004416       | TCEANC       |
| 8171350 | -1,50 | -2,83 | 0,00914 | -1,90 | -3,73  | 0,00083 | NM_152634       | ---          |
| 7913976 | -1,50 | -2,83 | 0,00026 | -1,33 | -2,51  | 0,02000 | ---             | ---          |
| 7934838 | -1,50 | -2,83 | 0,01559 | -1,16 | -2,23  | 0,00489 | ---             | ---          |
| 7951824 | -1,50 | -2,83 | 0,01219 | -2,34 | -5,08  | 0,00013 | ---             | GZMH         |
| 7978360 | -1,50 | -2,84 | 0,01169 | -0,92 | -1,89  | 0,00086 | NM_033423       | ODF1         |
| 8147717 | -1,50 | -2,84 | 0,00463 | -1,94 | -3,83  | 0,02263 | NM_024410       | C1orf210     |
| 7915500 | -1,50 | -2,84 | 0,05066 | 0,13  | 1,09   | 0,71647 | NM_182517       | LPPR3        |
| 8032094 | -1,50 | -2,84 | 0,06039 | -1,09 | -2,13  | 0,03269 | NM_024888       | UNC80        |
| 8047952 | -1,50 | -2,84 | 0,08064 | -1,08 | -2,11  | 0,01976 | NM_032504       | ---          |
| 7900977 | -1,50 | -2,84 | 0,02528 | -1,83 | -3,55  | 0,00042 | ---             | GPSM3        |
| 8178790 | -1,50 | -2,84 | 0,15080 | -0,85 | -1,81  | 0,02238 | NM_022107       | ZNF540       |
| 8036403 | -1,50 | -2,84 | 0,12225 | -1,18 | -2,26  | 0,17385 | ENST00000436972 | CPLX1        |
| 8098782 | -1,50 | -2,84 | 0,03319 | -1,01 | -2,02  | 0,00567 | NM_006651       | ---          |
| 7902102 | -1,51 | -2,84 | 0,02261 | -1,27 | -2,41  | 0,03954 | ---             | WDR87        |
| 8036451 | -1,51 | -2,84 | 0,00296 | -0,69 | -1,62  | 0,03055 | NM_031951       | CIDEC        |

|         |       |       |         |       |        |         |               |           |
|---------|-------|-------|---------|-------|--------|---------|---------------|-----------|
| 8085244 | -1,51 | -2,84 | 0,00788 | -1,48 | -2,80  | 0,00201 | NM_022094     | ---       |
| 7946695 | -1,51 | -2,84 | 0,12472 | -1,18 | -2,26  | 0,13154 | ---           | ETV2      |
| 8027920 | -1,51 | -2,84 | 0,06271 | -1,58 | -3,00  | 0,00846 | NM_014209     | DEFB132   |
| 8060325 | -1,51 | -2,84 | 0,04810 | -2,43 | -5,39  | 0,00018 | NM_207469     | ---       |
| 8112174 | -1,51 | -2,84 | 0,11187 | -2,59 | -6,01  | 0,00146 | ---           | TFF3      |
| 8070567 | -1,51 | -2,84 | 0,02461 | -2,72 | -6,61  | 0,00089 | NM_003226     | ---       |
| 8003848 | -1,51 | -2,84 | 0,00845 | -1,56 | -2,95  | 0,00089 | ---           | KCNK4     |
| 7940971 | -1,51 | -2,84 | 0,04346 | -1,93 | -3,81  | 0,00224 | NM_033310     | RSPO4     |
| 8064407 | -1,51 | -2,84 | 0,00907 | -2,21 | -4,63  | 0,00202 | NM_001029871  | ---       |
| 8134345 | -1,51 | -2,84 | 0,01291 | -1,32 | -2,50  | 0,00061 | ---           | ---       |
| 8143108 | -1,51 | -2,84 | 0,04859 | -2,44 | -5,42  | 0,00552 | ---           | ZBTB46    |
| 8067743 | -1,51 | -2,84 | 0,00782 | -0,85 | -1,80  | 0,02468 | NM_025224     | LOC80154  |
| 7985571 | -1,51 | -2,84 | 0,04630 | 1,56  | 2,94   | 0,04532 | NR_026811     | KCNJ9     |
| 7906496 | -1,51 | -2,84 | 0,02502 | -2,13 | -4,38  | 0,00060 | NM_004983     | ---       |
| 8143894 | -1,51 | -2,84 | 0,00230 | -0,33 | -1,26  | 0,26274 | ---           | C10orf81  |
| 7930593 | -1,51 | -2,85 | 0,05488 | -0,69 | -1,62  | 0,03230 | NM_024889     | ---       |
| 8142466 | -1,51 | -2,85 | 0,02802 | -2,00 | -3,99  | 0,00013 | ---           | DEFB113   |
| 8126937 | -1,51 | -2,85 | 0,00037 | -1,38 | -2,60  | 0,00069 | NM_001037729  | ---       |
| 8022974 | -1,51 | -2,85 | 0,01301 | -1,24 | -2,36  | 0,00039 | ---           | ONECUT2   |
| 8021357 | -1,51 | -2,85 | 0,00541 | -1,89 | -3,72  | 0,01022 | NM_004852     | GNRH2     |
| 8060594 | -1,51 | -2,85 | 0,01618 | -1,11 | -2,16  | 0,08215 | NM_001501     | BMP8B     |
| 7915252 | -1,51 | -2,85 | 0,10599 | -0,40 | -1,32  | 0,54891 | NM_001720     | ---       |
| 8066981 | -1,51 | -2,85 | 0,02790 | -2,46 | -5,52  | 0,00098 | ---           | ICAM2     |
| 8017547 | -1,51 | -2,85 | 0,00112 | -1,56 | -2,95  | 0,00810 | NM_001099786  | FAM3A     |
| 8176117 | -1,51 | -2,85 | 0,04395 | -1,44 | -2,72  | 0,09695 | NR_033237     | ---       |
| 7920468 | -1,51 | -2,85 | 0,03303 | -1,32 | -2,50  | 0,01849 | ---           | BCL11B    |
| 7981242 | -1,51 | -2,85 | 0,01566 | -0,32 | -1,25  | 0,27481 | NM_138576     | ---       |
| 8048723 | -1,51 | -2,85 | 0,01608 | -0,92 | -1,89  | 0,00004 | ---           | SEC14L4   |
| 8075390 | -1,51 | -2,85 | 0,10434 | -0,35 | -1,27  | 0,49788 | NM_174977     | KLK15     |
| 8038643 | -1,51 | -2,85 | 0,01179 | -1,15 | -2,22  | 0,02295 | NM_017509     | ---       |
| 7981383 | -1,51 | -2,85 | 0,05813 | -0,86 | -1,82  | 0,10100 | ---           | CSNK1A1L  |
| 7971071 | -1,51 | -2,85 | 0,12697 | -1,85 | -3,61  | 0,00206 | NM_145203     | HBZ       |
| 7991750 | -1,51 | -2,85 | 0,01062 | -1,24 | -2,36  | 0,10962 | NM_005332     | DRD5      |
| 8053725 | -1,51 | -2,85 | 0,29972 | -3,93 | -15,29 | 0,00000 | NM_000798     | GP6       |
| 8039294 | -1,51 | -2,85 | 0,04431 | -1,81 | -3,51  | 0,00236 | NM_001083899  | ZNF541    |
| 8037931 | -1,51 | -2,85 | 0,01697 | -1,29 | -2,45  | 0,04134 | NM_001101419  | RAB40B    |
| 8019532 | -1,51 | -2,85 | 0,00231 | 0,07  | 1,05   | 0,92198 | NM_006822     | ---       |
| 7913185 | -1,51 | -2,85 | 0,00350 | -2,42 | -5,36  | 0,00159 | ---           | OR4N2     |
| 7973010 | -1,51 | -2,85 | 0,00791 | -1,70 | -3,26  | 0,05690 | NM_001004723  | HAS1      |
| 8038890 | -1,51 | -2,86 | 0,04238 | -1,61 | -3,05  | 0,03094 | NM_001523     | HOK       |
| 8049876 | -1,51 | -2,86 | 0,00996 | -0,02 | -1,02  | 0,97669 | NM_032515     | UQCRCFS1  |
| 8035880 | -1,51 | -2,86 | 0,15424 | -2,13 | -4,36  | 0,04760 | NM_006003     | ---       |
| 7961873 | -1,51 | -2,86 | 0,00451 | -1,22 | -2,33  | 0,01527 | ---           | HRG       |
| 8084668 | -1,51 | -2,86 | 0,01626 | -1,11 | -2,16  | 0,01275 | NM_000412     | ITGA9     |
| 8078619 | -1,51 | -2,86 | 0,01557 | -0,25 | -1,19  | 0,59974 | NM_002207     | CFC1      |
| 8055239 | -1,51 | -2,86 | 0,09859 | -1,47 | -2,76  | 0,00434 | NM_032545     | GLTPD2    |
| 8003948 | -1,51 | -2,86 | 0,03621 | -1,85 | -3,60  | 0,02331 | NM_001014985  | TUBA3E    |
| 8055194 | -1,51 | -2,86 | 0,07413 | -2,69 | -6,44  | 0,00001 | NM_207312     | CLPS      |
| 8125936 | -1,51 | -2,86 | 0,03701 | -2,31 | -4,94  | 0,00002 | NM_001832     | SLC2A4    |
| 8004309 | -1,52 | -2,86 | 0,01065 | 0,26  | 1,20   | 0,50060 | NM_001042     | TMEM61    |
| 7901687 | -1,52 | -2,86 | 0,06031 | 1,09  | 2,14   | 0,04906 | NM_182532     | MUC17     |
| 8135048 | -1,52 | -2,86 | 0,00031 | -1,06 | -2,08  | 0,03748 | NM_001040105  | KLRC3     |
| 7961175 | -1,52 | -2,86 | 0,00572 | -0,57 | -1,48  | 0,04151 | NM_002261     | ---       |
| 8066072 | -1,52 | -2,86 | 0,05245 | -1,61 | -3,05  | 0,00000 | ---           | MCSR      |
| 8020339 | -1,52 | -2,86 | 0,03873 | -0,50 | -1,41  | 0,49390 | NM_005913     | MAL       |
| 8043504 | -1,52 | -2,86 | 0,00319 | -0,98 | -1,97  | 0,00285 | NM_002371     | PNMA6A    |
| 8170630 | -1,52 | -2,86 | 0,07429 | -0,80 | -1,75  | 0,16077 | NM_032882     | DRD5      |
| 7905025 | -1,52 | -2,86 | 0,27541 | -4,19 | -18,25 | 0,00001 | NM_000798     | ---       |
| 7917752 | -1,52 | -2,86 | 0,03541 | -0,93 | -1,90  | 0,02898 | ---           | C19orf60  |
| 8027032 | -1,52 | -2,86 | 0,01872 | 0,35  | 1,27   | 0,57808 | NM_001100418  | KRTAP21-1 |
| 8069859 | -1,52 | -2,86 | 0,02167 | -1,17 | -2,24  | 0,02239 | NM_181619     | ---       |
| 8093991 | -1,52 | -2,86 | 0,07911 | -0,87 | -1,83  | 0,00779 | ---           | ---       |
| 8065244 | -1,52 | -2,86 | 0,08689 | -1,29 | -2,45  | 0,00418 | ---           | ---       |
| 7961622 | -1,52 | -2,86 | 0,00424 | -2,24 | -4,73  | 0,00873 | ---           | MIRLET7F1 |
| 8156521 | -1,52 | -2,86 | 0,01336 | -2,27 | -4,82  | 0,01035 | NR_029483     | C18orf20  |
| 8023703 | -1,52 | -2,86 | 0,03440 | -1,22 | -2,33  | 0,00066 | BC029565 ANO2 | ---       |
| 7960438 | -1,52 | -2,87 | 0,00159 | -0,70 | -1,63  | 0,04830 | NM_020373     | ---       |
| 8036031 | -1,52 | -2,87 | 0,06374 | -2,23 | -4,69  | 0,00027 | ---           | NHEDC1    |
| 8102039 | -1,52 | -2,87 | 0,00445 | -1,07 | -2,10  | 0,01109 | NM_001100874  | MYO1A     |
| 7964316 | -1,52 | -2,87 | 0,02424 | -0,81 | -1,75  | 0,00024 | NM_005379     | SHANK3    |
| 8074131 | -1,52 | -2,87 | 0,00391 | -0,19 | -1,14  | 0,60610 | NM_001080420  | ---       |
| 7982282 | -1,52 | -2,87 | 0,34754 | -2,78 | -6,88  | 0,00053 | ---           | ---       |
| 7982307 | -1,52 | -2,87 | 0,34754 | -2,78 | -6,88  | 0,00053 | ---           | ---       |

|         |       |       |         |       |        |         |              |         |          |
|---------|-------|-------|---------|-------|--------|---------|--------------|---------|----------|
| 7981771 | -1,52 | -2,87 | 0,11246 | -1,95 | -3,88  | 0,02250 | ---          | ---     |          |
| 7981893 | -1,52 | -2,87 | 0,11246 | -1,95 | -3,88  | 0,02250 | ---          | FEZF1   |          |
| 8142580 | -1,52 | -2,87 | 0,01963 | -0,54 | -1,45  | 0,12154 | NM_001024613 |         | CAPSL    |
| 8111506 | -1,52 | -2,87 | 0,00985 | -1,33 | -2,51  | 0,02720 | NM_144647    |         | ---      |
| 8150274 | -1,52 | -2,87 | 0,03142 | -1,71 | -3,27  | 0,00154 | ---          | VAX2    |          |
| 8042532 | -1,52 | -2,87 | 0,00991 | -1,18 | -2,27  | 0,03232 | NM_012476    |         | ---      |
| 8013049 | -1,52 | -2,87 | 0,00424 | -1,74 | -3,33  | 0,01447 | ---          | RPL10L  |          |
| 7978795 | -1,52 | -2,87 | 0,01293 | -1,66 | -3,15  | 0,00983 | NM_080746    |         | CARD10   |
| 8075934 | -1,52 | -2,87 | 0,00413 | -0,25 | -1,19  | 0,52545 | NM_014550    |         | ---      |
| 8161371 | -1,52 | -2,87 | 0,05452 | -2,06 | -4,18  | 0,01133 | ---          | KLK13   |          |
| 8038760 | -1,52 | -2,87 | 0,06140 | -1,97 | -3,92  | 0,00092 | NM_015596    |         | OVOL2    |
| 8065185 | -1,52 | -2,87 | 0,04122 | -0,96 | -1,94  | 0,01361 | NM_021220    |         | ---      |
| 8021372 | -1,52 | -2,88 | 0,23386 | -1,00 | -2,00  | 0,09476 | ---          | CBLC    |          |
| 8029476 | -1,52 | -2,88 | 0,00276 | -0,18 | -1,13  | 0,72693 | NM_012116    |         | PPIL5    |
| 7978831 | -1,52 | -2,88 | 0,00032 | -1,19 | -2,28  | 0,25876 | NM_152329    |         | CYP26B1  |
| 8052947 | -1,52 | -2,88 | 0,00159 | 0,15  | 1,11   | 0,73383 | NM_019885    |         | ---      |
| 7962201 | -1,52 | -2,88 | 0,02536 | -1,70 | -3,25  | 0,00294 | ---          | KCNK13  |          |
| 7976182 | -1,52 | -2,88 | 0,00296 | -0,69 | -1,61  | 0,12565 | NM_022054    |         | ---      |
| 8071204 | -1,52 | -2,88 | 0,00197 | -1,26 | -2,40  | 0,02030 | ---          | SLC6A2  |          |
| 7995714 | -1,52 | -2,88 | 0,01250 | -0,67 | -1,59  | 0,17046 | NM_001043    |         | ESRP2    |
| 8002218 | -1,52 | -2,88 | 0,07444 | 2,02  | 4,04   | 0,00703 | NM_024939    |         | GGTLC1   |
| 8065427 | -1,52 | -2,88 | 0,01219 | -1,94 | -3,85  | 0,00440 | NM_178311    |         | PRSSL1   |
| 8032088 | -1,53 | -2,88 | 0,01216 | -1,50 | -2,82  | 0,03630 | NM_214710    |         | TRIM43   |
| 8043574 | -1,53 | -2,88 | 0,04236 | -1,76 | -3,39  | 0,00040 | NM_138800    |         | MIR197   |
| 7903717 | -1,53 | -2,88 | 0,20249 | -0,45 | -1,37  | 0,56078 | NR_029583    |         | WFDC9    |
| 8066559 | -1,53 | -2,88 | 0,00271 | -1,51 | -2,84  | 0,00106 | NM_147198    |         | IZUMO1   |
| 8038177 | -1,53 | -2,88 | 0,00335 | -1,52 | -2,87  | 0,00013 | NM_182575    |         | ---      |
| 8042827 | -1,53 | -2,88 | 0,10435 | -1,18 | -2,26  | 0,04788 | ---          | SNTG1   |          |
| 8146403 | -1,53 | -2,88 | 0,00092 | -1,70 | -3,24  | 0,00071 | NM_018967    |         | CROCC    |
| 7898377 | -1,53 | -2,88 | 0,02520 | -1,43 | -2,69  | 0,00596 | NM_014675    |         | AURKAIP1 |
| 7911532 | -1,53 | -2,88 | 0,00102 | -1,17 | -2,25  | 0,00310 | NM_017900    |         | CCDC85C  |
| 7981273 | -1,53 | -2,88 | 0,00888 | 2,07  | 4,20   | 0,02934 | NM_001144995 |         | ---      |
| 8071371 | -1,53 | -2,88 | 0,02304 | -1,66 | -3,15  | 0,01057 | ---          | ---     |          |
| 8071543 | -1,53 | -2,88 | 0,02304 | -1,66 | -3,15  | 0,01057 | ---          | ---     |          |
| 8074746 | -1,53 | -2,88 | 0,02304 | -1,66 | -3,15  | 0,01057 | ---          | FUK     |          |
| 7997072 | -1,53 | -2,88 | 0,01606 | -0,76 | -1,69  | 0,05436 | NM_145059    |         | SNX22    |
| 7984174 | -1,53 | -2,88 | 0,06566 | -1,50 | -2,83  | 0,00994 | NM_024798    |         | TCF3     |
| 8032290 | -1,53 | -2,88 | 0,01205 | 1,24  | 2,36   | 0,16259 | NM_003200    |         | CFC1B    |
| 8045198 | -1,53 | -2,88 | 0,09039 | -1,40 | -2,64  | 0,00329 | NM_001079530 |         | AQPEP    |
| 8113658 | -1,53 | -2,88 | 0,15196 | -1,51 | -2,84  | 0,00023 | NM_173800    |         | PADI2    |
| 7912937 | -1,53 | -2,88 | 0,03543 | 1,03  | 2,05   | 0,02445 | NM_007365    |         | ---      |
| 8105989 | -1,53 | -2,88 | 0,48296 | -6,01 | -64,62 | 0,00008 | ---          | LRRC29  |          |
| 8001971 | -1,53 | -2,88 | 0,04596 | -1,90 | -3,73  | 0,00029 | NM_012163    |         | ---      |
| 8056489 | -1,53 | -2,88 | 0,04406 | -2,18 | -4,55  | 0,00319 | ---          | EXTL1   |          |
| 7899075 | -1,53 | -2,88 | 0,01751 | -1,26 | -2,39  | 0,05864 | NM_004455    |         | SULT1A1  |
| 8000590 | -1,53 | -2,88 | 0,04145 | -1,93 | -3,82  | 0,01020 | NM_177534    |         | C2orf62  |
| 8048272 | -1,53 | -2,89 | 0,04375 | -2,13 | -4,38  | 0,00019 | BC052750     | TSPAN10 |          |
| 8010624 | -1,53 | -2,89 | 0,02757 | -1,06 | -2,08  | 0,07773 | NM_031945    |         | ---      |
| 8174983 | -1,53 | -2,89 | 0,02471 | -2,14 | -4,42  | 0,01195 | ---          | LCE3E   |          |
| 7920182 | -1,53 | -2,89 | 0,13893 | -1,40 | -2,65  | 0,05793 | NM_178435    |         | LRRC4B   |
| 8038584 | -1,53 | -2,89 | 0,02682 | -0,50 | -1,41  | 0,43250 | NM_001080457 |         | ---      |
| 8142450 | -1,53 | -2,89 | 0,00403 | -1,00 | -2,00  | 0,01351 | ---          | ZNF488  |          |
| 7927383 | -1,53 | -2,89 | 0,00052 | -0,33 | -1,26  | 0,27194 | NM_153034    |         | ---      |
| 8022610 | -1,53 | -2,89 | 0,03463 | -2,06 | -4,18  | 0,00016 | ---          | UNCX    |          |
| 8131087 | -1,53 | -2,89 | 0,11246 | -2,35 | -5,11  | 0,01282 | NM_001080461 |         | ---      |
| 7967025 | -1,53 | -2,89 | 0,15375 | -3,45 | -10,96 | 0,00003 | ---          | ---     |          |
| 8006744 | -1,53 | -2,89 | 0,05811 | -1,29 | -2,44  | 0,01671 | ---          | ---     |          |
| 8014435 | -1,53 | -2,89 | 0,05811 | -1,29 | -2,44  | 0,01671 | ---          | ---     |          |
| 8014648 | -1,53 | -2,89 | 0,05811 | -1,29 | -2,44  | 0,01671 | ---          | ---     |          |
| 8019647 | -1,53 | -2,89 | 0,05811 | -1,29 | -2,44  | 0,01671 | ---          | MAP3K4  |          |
| 8130624 | -1,53 | -2,89 | 0,01325 | -2,48 | -5,59  | 0,00007 | NM_005922    |         | ---      |
| 8066820 | -1,53 | -2,89 | 0,01997 | -1,07 | -2,10  | 0,07397 | ---          | GLT6D1  |          |
| 8165032 | -1,53 | -2,89 | 0,00724 | -1,58 | -2,99  | 0,00489 | NM_182974    |         | ---      |
| 8125563 | -1,53 | -2,89 | 0,00104 | -1,08 | -2,11  | 0,00195 | ---          | ---     |          |
| 8066983 | -1,53 | -2,89 | 0,01512 | -1,34 | -2,53  | 0,08158 | ---          | ---     |          |
| 8108180 | -1,53 | -2,89 | 0,24974 | -4,96 | -31,12 | 0,00427 | ---          | ---     |          |
| 8002216 | -1,53 | -2,89 | 0,00922 | -1,62 | -3,07  | 0,00149 | ---          | MTUS2   |          |
| 7968307 | -1,53 | -2,89 | 0,00811 | -0,93 | -1,90  | 0,00028 | NM_001033602 |         | FLJ38773 |
| 8065758 | -1,53 | -2,89 | 0,00250 | -1,28 | -2,44  | 0,02077 | AK096092     | KCP     |          |
| 8142830 | -1,53 | -2,89 | 0,03871 | -1,80 | -3,47  | 0,00019 | NM_199349    |         | SCGBL    |
| 8036033 | -1,53 | -2,89 | 0,03174 | -0,01 | -1,01  | 0,97433 | NM_001025591 |         | ZSCAN1   |
| 8031847 | -1,53 | -2,89 | 0,01016 | -2,64 | -6,24  | 0,00887 | NM_182572    |         | PLK5P    |
| 8024331 | -1,53 | -2,89 | 0,00823 | -1,88 | -3,69  | 0,00794 | NR_026557    |         | DMRT2    |

|         |       |       |         |       |        |         |                 |           |
|---------|-------|-------|---------|-------|--------|---------|-----------------|-----------|
| 8154047 | -1,53 | -2,89 | 0,00370 | -1,08 | -2,11  | 0,04341 | NM_006557       | ---       |
| 8000407 | -1,53 | -2,89 | 0,00471 | -0,89 | -1,85  | 0,00086 | ---             | NKX2-3    |
| 7929744 | -1,53 | -2,89 | 0,01723 | -1,21 | -2,31  | 0,00030 | NM_145285       | C12orf52  |
| 7958950 | -1,53 | -2,90 | 0,01669 | -0,63 | -1,55  | 0,18993 | BC022092        | TLCD2     |
| 8011188 | -1,53 | -2,90 | 0,12580 | -1,84 | -3,58  | 0,02204 | NM_001164407    | KLHL38    |
| 8152715 | -1,53 | -2,90 | 0,04204 | -1,44 | -2,71  | 0,00063 | NM_001081675    | NXP4      |
| 7956395 | -1,53 | -2,90 | 0,01259 | -0,88 | -1,83  | 0,09331 | NM_007224       | ---       |
| 8127658 | -1,53 | -2,90 | 0,03203 | -1,92 | -3,78  | 0,01725 | ---             | TCEB3B    |
| 8023159 | -1,53 | -2,90 | 0,01670 | -2,42 | -5,36  | 0,00005 | NM_016427       | VWA1      |
| 7896929 | -1,53 | -2,90 | 0,00523 | -1,22 | -2,33  | 0,03948 | NM_022834       | ---       |
| 7941597 | -1,54 | -2,90 | 0,08973 | -0,73 | -1,66  | 0,02427 | ---             | DRD2      |
| 7951703 | -1,54 | -2,90 | 0,00810 | -2,14 | -4,40  | 0,00076 | NM_000795       | FIBCD1    |
| 8164632 | -1,54 | -2,90 | 0,02065 | -0,64 | -1,56  | 0,13857 | NM_032843       | MBD3      |
| 8032275 | -1,54 | -2,90 | 0,03498 | -0,24 | -1,18  | 0,64799 | NM_003926       | ---       |
| 8098244 | -1,54 | -2,90 | 0,01981 | -1,40 | -2,64  | 0,00559 | ---             | ---       |
| 8071442 | -1,54 | -2,90 | 0,02590 | -1,51 | -2,84  | 0,00067 | ---             | NCCRP1    |
| 8028600 | -1,54 | -2,90 | 0,05993 | -2,50 | -5,66  | 0,00084 | NM_001001414    | PGAM2     |
| 8139276 | -1,54 | -2,90 | 0,04940 | -1,84 | -3,59  | 0,00341 | NM_000290       | KRTAP10-3 |
| 8070780 | -1,54 | -2,90 | 0,02699 | -1,87 | -3,67  | 0,00033 | NM_198696       | ---       |
| 8108979 | -1,54 | -2,90 | 0,00550 | -1,72 | -3,29  | 0,00045 | ---             | ---       |
| 8046522 | -1,54 | -2,90 | 0,03435 | -2,66 | -6,30  | 0,00336 | ---             | OR10J3    |
| 7921445 | -1,54 | -2,91 | 0,01284 | -1,60 | -3,04  | 0,00235 | NM_001004467    | ---       |
| 8165021 | -1,54 | -2,91 | 0,07611 | -3,63 | -12,40 | 0,00253 | ---             | KANK3     |
| 8033571 | -1,54 | -2,91 | 0,02223 | -1,91 | -3,76  | 0,00196 | NM_198471       | UCMA      |
| 7932088 | -1,54 | -2,91 | 0,00864 | -1,37 | -2,58  | 0,00219 | NM_145314       | CCL21     |
| 8160889 | -1,54 | -2,91 | 0,00468 | -2,05 | -4,15  | 0,00181 | NM_002989       | RBM1A1    |
| 8176742 | -1,54 | -2,91 | 0,01488 | -1,42 | -2,67  | 0,00197 | NM_005058       | EGR4      |
| 8053022 | -1,54 | -2,91 | 0,02666 | -1,60 | -3,03  | 0,00977 | NM_001965       | CEL       |
| 8158976 | -1,54 | -2,91 | 0,00215 | -1,13 | -2,19  | 0,00873 | NM_001807       | CASZ1     |
| 7912347 | -1,54 | -2,91 | 0,14917 | 0,17  | 1,12   | 0,73481 | NM_001079843    | ---       |
| 8140166 | -1,54 | -2,91 | 0,03161 | -1,28 | -2,43  | 0,00015 | ---             | DARC      |
| 7906435 | -1,54 | -2,91 | 0,01234 | -2,18 | -4,53  | 0,01627 | NM_002036       | DHRS13    |
| 8013804 | -1,54 | -2,91 | 0,00972 | -0,39 | -1,31  | 0,26236 | NM_144683       | C9orf66   |
| 8159838 | -1,54 | -2,91 | 0,03500 | -0,86 | -1,82  | 0,08976 | NM_152569       | OR4L1     |
| 7973022 | -1,54 | -2,91 | 0,00315 | -2,02 | -4,06  | 0,01002 | NM_001004717    | GSC2      |
| 8074384 | -1,54 | -2,91 | 0,06497 | -2,20 | -4,59  | 0,00436 | NM_005315       | ---       |
| 8157522 | -1,54 | -2,91 | 0,09919 | -1,12 | -2,17  | 0,03993 | ---             | TNFRSF13B |
| 8013061 | -1,54 | -2,91 | 0,06272 | -1,46 | -2,76  | 0,00247 | NM_012452       | SP9       |
| 8056825 | -1,54 | -2,91 | 0,00164 | -1,16 | -2,23  | 0,05170 | NM_001145250    | ---       |
| 7991214 | -1,54 | -2,91 | 0,13124 | -1,21 | -2,32  | 0,06445 | ---             | GALNTL1   |
| 7975324 | -1,54 | -2,91 | 0,05381 | -0,84 | -1,79  | 0,04257 | NM_001168368    | CECR6     |
| 8074223 | -1,54 | -2,91 | 0,00110 | -1,37 | -2,59  | 0,01506 | NM_031890       | TRIM50    |
| 8140028 | -1,54 | -2,91 | 0,04792 | -1,52 | -2,88  | 0,00548 | NM_178125       | ---       |
| 7988601 | -1,54 | -2,91 | 0,00008 | -1,60 | -3,04  | 0,00141 | ---             | DUSP2     |
| 8053882 | -1,54 | -2,91 | 0,00485 | -1,16 | -2,23  | 0,04791 | NM_004418       | AQP12A    |
| 8049729 | -1,54 | -2,91 | 0,02015 | -1,88 | -3,67  | 0,00129 | NM_198998       | INO80E    |
| 7994715 | -1,54 | -2,91 | 0,01182 | -2,06 | -4,18  | 0,00030 | NM_173618       | ACSM2B    |
| 7999965 | -1,54 | -2,91 | 0,00593 | -1,91 | -3,76  | 0,00024 | NM_182617       | ---       |
| 8044611 | -1,54 | -2,91 | 0,00212 | -1,65 | -3,14  | 0,00276 | ---             | ---       |
| 8040486 | -1,54 | -2,91 | 0,06523 | -0,83 | -1,78  | 0,01389 | ---             | ---       |
| 7952488 | -1,54 | -2,91 | 0,03306 | -1,62 | -3,08  | 0,03374 | ---             | ---       |
| 8111017 | -1,54 | -2,91 | 0,01142 | -1,07 | -2,10  | 0,00031 | ---             | ---       |
| 8012138 | -1,54 | -2,91 | 0,02128 | -2,20 | -4,59  | 0,00052 | ---             | TMEM179   |
| 7981490 | -1,54 | -2,92 | 0,01807 | -1,06 | -2,08  | 0,02500 | NM_207379       | GAS2L2    |
| 8014269 | -1,54 | -2,92 | 0,00606 | -1,25 | -2,37  | 0,00002 | NM_139285       | S100A5    |
| 7920264 | -1,54 | -2,92 | 0,06907 | -1,63 | -3,09  | 0,00016 | NM_002962       | SPNS2     |
| 8003875 | -1,54 | -2,92 | 0,01100 | 0,92  | 1,90   | 0,20809 | NM_001124758    | GRAPL     |
| 8005549 | -1,54 | -2,92 | 0,02343 | -1,79 | -3,46  | 0,00077 | NM_001129778    | MIR10B    |
| 8046553 | -1,54 | -2,92 | 0,01299 | -1,04 | -2,06  | 0,02068 | NR_029609       | IGKV4-1   |
| 8043423 | -1,54 | -2,92 | 0,02949 | -1,87 | -3,66  | 0,06264 | ENST00000390243 | CCDC61    |
| 8029759 | -1,54 | -2,92 | 0,00973 | -0,05 | -1,04  | 0,85724 | NM_001080402    | NRGN      |
| 7944876 | -1,55 | -2,92 | 0,00492 | -1,81 | -3,52  | 0,01383 | NM_006176       | ---       |
| 8121508 | -1,55 | -2,92 | 0,00209 | -1,67 | -3,18  | 0,00007 | ---             | OR10J5    |
| 7921447 | -1,55 | -2,92 | 0,02583 | -0,73 | -1,66  | 0,03121 | NM_001004469    | SBK1      |
| 7994345 | -1,55 | -2,92 | 0,03471 | -1,35 | -2,55  | 0,00282 | NM_001024401    | KLK5      |
| 8038670 | -1,55 | -2,92 | 0,00500 | -1,77 | -3,41  | 0,01185 | NM_012427       | DDX25     |
| 7945045 | -1,55 | -2,92 | 0,00322 | -0,78 | -1,72  | 0,00292 | NM_013264       | 05_Sep    |
| 8071259 | -1,55 | -2,92 | 0,00765 | -1,20 | -2,30  | 0,00672 | NM_002688       | NUDT18    |
| 8149646 | -1,55 | -2,93 | 0,01275 | -1,15 | -2,22  | 0,11452 | NM_024815       | ---       |
| 8133896 | -1,55 | -2,93 | 0,10828 | -3,61 | -12,17 | 0,00108 | ---             | SRRM4     |
| 7959087 | -1,55 | -2,93 | 0,02454 | -2,22 | -4,67  | 0,00019 | NM_194286       | FAM54B    |
| 7913850 | -1,55 | -2,93 | 0,04229 | -1,32 | -2,50  | 0,03542 | NM_019557       | LPLP1     |
| 7905559 | -1,55 | -2,93 | 0,01119 | -2,38 | -5,22  | 0,00859 | NM_001010857    | KRTAP19-8 |



|         |       |       |         |       |        |         |              |           |
|---------|-------|-------|---------|-------|--------|---------|--------------|-----------|
| 8069876 | -1,55 | -2,93 | 0,00282 | -1,41 | -2,66  | 0,00549 | NM_001099219 | C17orf59  |
| 8012397 | -1,55 | -2,93 | 0,00770 | -0,30 | -1,23  | 0,31793 | NM_017622    | ---       |
| 8083590 | -1,55 | -2,93 | 0,10443 | -1,63 | -3,09  | 0,00035 | ---          | ---       |
| 8161697 | -1,55 | -2,93 | 0,00462 | -2,45 | -5,48  | 0,00121 | ---          | MORN1     |
| 7911701 | -1,55 | -2,93 | 0,02510 | -1,29 | -2,45  | 0,05157 | NM_024848    | EEF1D     |
| 8153457 | -1,55 | -2,93 | 0,00501 | -1,73 | -3,31  | 0,01974 | AY358690     | GLB1L2    |
| 7945321 | -1,55 | -2,93 | 0,02070 | 2,66  | 6,32   | 0,00085 | NM_138342    | TIMM16    |
| 7999112 | -1,55 | -2,93 | 0,03668 | -0,13 | -1,09  | 0,74627 | NM_016069    | CD4       |
| 7953428 | -1,55 | -2,93 | 0,00101 | -0,48 | -1,39  | 0,18272 | NM_000616    | PRB1      |
| 7961306 | -1,55 | -2,93 | 0,05152 | -2,18 | -4,54  | 0,00316 | NM_005039    | RPL4      |
| 7989932 | -1,55 | -2,93 | 0,02499 | -0,95 | -1,93  | 0,01183 | NM_000968    | ANKRD9    |
| 7981377 | -1,55 | -2,93 | 0,00825 | 0,17  | 1,13   | 0,76303 | NM_152326    | ---       |
| 8154130 | -1,55 | -2,93 | 0,00905 | -1,66 | -3,15  | 0,08518 | ---          | ZGPAT     |
| 8064156 | -1,55 | -2,93 | 0,03792 | -0,43 | -1,35  | 0,42133 | NM_032527    | NSAP11    |
| 8144874 | -1,55 | -2,93 | 0,00437 | -0,31 | -1,24  | 0,41596 | AY176665     | FLJ41423  |
| 7939581 | -1,55 | -2,93 | 0,02115 | -1,27 | -2,42  | 0,00099 | AK123417     | FBXO2     |
| 7912473 | -1,55 | -2,93 | 0,00605 | -1,16 | -2,23  | 0,02919 | NM_012168    | MIR299    |
| 7976830 | -1,55 | -2,93 | 0,05841 | -2,01 | -4,01  | 0,00005 | NR_029841    | CXorf18   |
| 8170247 | -1,55 | -2,93 | 0,11295 | -1,20 | -2,31  | 0,04000 | AK093505     | OR10Q1    |
| 7948314 | -1,55 | -2,93 | 0,03785 | -2,30 | -4,93  | 0,00049 | NM_001004471 | DRD5      |
| 7905020 | -1,55 | -2,94 | 0,04743 | -2,82 | -7,08  | 0,00432 | NM_000798    | SNORD50A  |
| 8127987 | -1,55 | -2,94 | 0,00218 | -1,83 | -3,56  | 0,00377 | NR_002743    | ---       |
| 7969091 | -1,55 | -2,94 | 0,22606 | -5,41 | -42,46 | 0,00000 | ---          | ---       |
| 8152131 | -1,55 | -2,94 | 0,07302 | -0,64 | -1,56  | 0,00289 | ---          | ---       |
| 8128077 | -1,55 | -2,94 | 0,00392 | -1,04 | -2,06  | 0,00033 | ---          | SNORA37   |
| 8023392 | -1,55 | -2,94 | 0,00208 | -2,41 | -5,32  | 0,00037 | NR_002970    | GFRA3     |
| 8114415 | -1,56 | -2,94 | 0,03703 | -1,39 | -2,62  | 0,00060 | NM_001496    | LOC441239 |
| 8139828 | -1,56 | -2,94 | 0,02615 | -1,35 | -2,54  | 0,03095 | BC063653     | KCNK9     |
| 8153167 | -1,56 | -2,94 | 0,05915 | -1,77 | -3,40  | 0,00010 | NM_016601    | ---       |
| 7954291 | -1,56 | -2,94 | 0,00367 | -1,66 | -3,17  | 0,00595 | ---          | ---       |
| 8108422 | -1,56 | -2,94 | 0,02442 | -1,85 | -3,59  | 0,01049 | ---          | AOC2      |
| 8007414 | -1,56 | -2,94 | 0,00264 | 0,20  | 1,15   | 0,71591 | NM_009590    | C1QL2     |
| 8054834 | -1,56 | -2,94 | 0,00841 | -1,44 | -2,72  | 0,00102 | NM_182528    | TSSK6     |
| 8035684 | -1,56 | -2,94 | 0,01888 | -0,90 | -1,87  | 0,01715 | NM_032037    | SIGLECP3  |
| 8030796 | -1,56 | -2,94 | 0,00601 | -1,52 | -2,86  | 0,01186 | NR_002804    | ---       |
| 8175119 | -1,56 | -2,94 | 0,01555 | -1,45 | -2,73  | 0,00012 | ---          | LOC389634 |
| 7960894 | -1,56 | -2,94 | 0,04488 | -1,68 | -3,21  | 0,01999 | NR_024420    | INHBB     |
| 8044927 | -1,56 | -2,94 | 0,00951 | -1,61 | -3,06  | 0,00328 | NM_002193    | CSDC2     |
| 8073449 | -1,56 | -2,94 | 0,01274 | -2,27 | -4,81  | 0,00058 | NM_014460    | PTCRA     |
| 8119599 | -1,56 | -2,94 | 0,01519 | -1,57 | -2,96  | 0,00815 | NM_138296    | MIRLET7E  |
| 8030844 | -1,56 | -2,95 | 0,01339 | -2,56 | -5,88  | 0,00053 | NR_029482    | ---       |
| 7973444 | -1,56 | -2,95 | 0,01756 | -1,53 | -2,88  | 0,00057 | ---          | CD93      |
| 8065359 | -1,56 | -2,95 | 0,01435 | -0,68 | -1,60  | 0,00549 | NM_012072    | SNORA5B   |
| 8139486 | -1,56 | -2,95 | 0,01695 | -2,12 | -4,36  | 0,05887 | NR_002990    | VENTX     |
| 7931556 | -1,56 | -2,95 | 0,01870 | -2,40 | -5,27  | 0,00058 | NM_014468    | GATA4     |
| 8144643 | -1,56 | -2,95 | 0,00550 | -0,68 | -1,61  | 0,09596 | NM_002052    | LRRN2     |
| 7923700 | -1,56 | -2,95 | 0,05135 | -0,41 | -1,33  | 0,20012 | NM_006338    | CCNO      |
| 8112072 | -1,56 | -2,95 | 0,01021 | -0,67 | -1,59  | 0,14142 | NM_021147    | TLR2      |
| 8097903 | -1,56 | -2,95 | 0,01726 | -0,29 | -1,22  | 0,07696 | NM_003264    | TCTE3     |
| 8130927 | -1,56 | -2,95 | 0,00396 | -1,55 | -2,92  | 0,02614 | NM_174910    | ---       |
| 8100013 | -1,56 | -2,95 | 0,00829 | -1,52 | -2,86  | 0,00724 | ---          | ---       |
| 8070925 | -1,56 | -2,95 | 0,04336 | -1,85 | -3,61  | 0,00042 | ---          | ---       |
| 8152900 | -1,56 | -2,95 | 0,09301 | -1,82 | -3,54  | 0,00347 | ---          | KRTAP5-2  |
| 7937696 | -1,56 | -2,95 | 0,03149 | -0,64 | -1,56  | 0,26174 | NM_001004325 | ADCY8     |
| 8152902 | -1,56 | -2,95 | 0,00003 | -1,80 | -3,48  | 0,00342 | NM_001115    | OR2L3     |
| 7911258 | -1,56 | -2,95 | 0,06600 | -2,17 | -4,49  | 0,01690 | NM_001004687 | LTC4S     |
| 8110562 | -1,56 | -2,95 | 0,00840 | -1,12 | -2,18  | 0,01328 | NM_145867    | MAGEA6    |
| 8170553 | -1,56 | -2,95 | 0,02401 | -1,31 | -2,48  | 0,00119 | NM_175868    | REN       |
| 7923608 | -1,56 | -2,95 | 0,00107 | -0,85 | -1,81  | 0,06455 | NM_000537    | ---       |
| 7946693 | -1,56 | -2,95 | 0,09324 | -1,28 | -2,43  | 0,00654 | ---          | ---       |
| 8105935 | -1,56 | -2,95 | 0,48390 | -6,10 | -68,72 | 0,00014 | ---          | C17orf56  |
| 8019136 | -1,56 | -2,95 | 0,02830 | -1,21 | -2,31  | 0,05594 | BC064483     | ---       |
| 8153320 | -1,56 | -2,96 | 0,01115 | -2,74 | -6,66  | 0,00083 | ---          | PPP1R14C  |
| 8122734 | -1,56 | -2,96 | 0,07423 | -0,65 | -1,57  | 0,00338 | NM_030949    | COL18A1   |
| 8069208 | -1,56 | -2,96 | 0,01497 | -2,27 | -4,84  | 0,00055 | NM_030582    | DUSP23    |
| 7906469 | -1,56 | -2,96 | 0,04479 | 0,70  | 1,62   | 0,22891 | NM_017823    | PRB2      |
| 7961320 | -1,56 | -2,96 | 0,05070 | -2,31 | -4,98  | 0,00088 | NM_006248    | ARHGAP40  |
| 8062532 | -1,56 | -2,96 | 0,00455 | 0,36  | 1,29   | 0,20877 | NM_001164431 | RHOQ      |
| 8041808 | -1,56 | -2,96 | 0,19939 | -0,78 | -1,72  | 0,49606 | NM_012249    | FLJ42220  |
| 7973970 | -1,56 | -2,96 | 0,00846 | -1,18 | -2,26  | 0,01984 | AK124214     | PRLHR     |
| 7936590 | -1,56 | -2,96 | 0,01255 | -1,42 | -2,68  | 0,00194 | NM_004248    | ---       |
| 8146857 | -1,56 | -2,96 | 0,01484 | -1,11 | -2,16  | 0,00018 | ---          | DUX4      |
| 8176572 | -1,57 | -2,96 | 0,35489 | -4,86 | -29,02 | 0,00068 | NM_033178    | SFTPC     |

|         |       |       |         |       |       |         |              |            |
|---------|-------|-------|---------|-------|-------|---------|--------------|------------|
| 8145047 | -1,57 | -2,96 | 0,03303 | -1,20 | -2,29 | 0,02531 | NM_003018    | HS6ST2     |
| 8175195 | -1,57 | -2,96 | 0,01565 | -0,64 | -1,56 | 0,02620 | NM_001077188 | F2RL3      |
| 8026631 | -1,57 | -2,96 | 0,01219 | -1,33 | -2,51 | 0,00191 | NM_003950    | ---        |
| 8132043 | -1,57 | -2,96 | 0,03856 | -0,93 | -1,90 | 0,00222 | ---          | ---        |
| 8127822 | -1,57 | -2,96 | 0,00751 | -2,05 | -4,13 | 0,03434 | ---          | SHROOM2    |
| 8165934 | -1,57 | -2,96 | 0,00501 | -0,19 | -1,14 | 0,39260 | NM_001649    | ---        |
| 8110706 | -1,57 | -2,96 | 0,14319 | -1,85 | -3,60 | 0,04206 | ---          | FOXC2      |
| 7997733 | -1,57 | -2,96 | 0,01499 | -2,45 | -5,48 | 0,00003 | NM_005251    | ---        |
| 8164006 | -1,57 | -2,96 | 0,00701 | -0,75 | -1,68 | 0,06113 | ---          | GRIA1      |
| 8109383 | -1,57 | -2,96 | 0,01586 | -1,42 | -2,67 | 0,00549 | NM_000827    | S1PR2      |
| 8033956 | -1,57 | -2,96 | 0,00148 | -1,71 | -3,26 | 0,02999 | NM_004230    | IL29       |
| 8028613 | -1,57 | -2,96 | 0,04220 | -1,72 | -3,30 | 0,00005 | NM_172140    | SPSB2      |
| 7960709 | -1,57 | -2,96 | 0,00658 | -1,82 | -3,54 | 0,00374 | NM_001146316 | ---        |
| 7961960 | -1,57 | -2,96 | 0,04197 | -1,45 | -2,73 | 0,02300 | ---          | AQP5       |
| 7955297 | -1,57 | -2,97 | 0,04738 | -1,15 | -2,22 | 0,04879 | NM_001651    | PCDH17     |
| 7969330 | -1,57 | -2,97 | 0,00078 | -1,49 | -2,81 | 0,00067 | NM_001040429 | ZNF517     |
| 8148932 | -1,57 | -2,97 | 0,01203 | -1,88 | -3,69 | 0,00324 | NM_213605    | VWA5B1     |
| 7898627 | -1,57 | -2,97 | 0,01853 | -1,64 | -3,12 | 0,00005 | NM_001039500 | ---        |
| 8014035 | -1,57 | -2,97 | 0,05773 | -1,23 | -2,35 | 0,06283 | ---          | ---        |
| 8026298 | -1,57 | -2,97 | 0,05773 | -1,23 | -2,35 | 0,06283 | ---          | ---        |
| 8053715 | -1,57 | -2,97 | 0,00222 | -1,32 | -2,50 | 0,00285 | ---          | KRTAP12-3  |
| 8069161 | -1,57 | -2,97 | 0,08259 | -1,14 | -2,20 | 0,00245 | NM_198697    | ---        |
| 8045275 | -1,57 | -2,97 | 0,06603 | -0,91 | -1,87 | 0,06541 | ---          | BCL11A     |
| 8052399 | -1,57 | -2,97 | 0,00579 | -0,87 | -1,82 | 0,00808 | NM_022893    | PRSS22     |
| 7998878 | -1,57 | -2,97 | 0,00442 | 0,47  | 1,38  | 0,23153 | NM_022119    | ---        |
| 8139085 | -1,57 | -2,97 | 0,01724 | -0,65 | -1,57 | 0,15620 | ---          | ---        |
| 8154662 | -1,57 | -2,97 | 0,06147 | -0,78 | -1,72 | 0,26978 | ---          | ---        |
| 8132248 | -1,57 | -2,97 | 0,09751 | -1,87 | -3,64 | 0,02394 | ---          | COLEC11    |
| 8040045 | -1,57 | -2,97 | 0,00724 | -1,50 | -2,82 | 0,00308 | NM_199235    | PLA2G2E    |
| 7913211 | -1,57 | -2,97 | 0,00187 | -0,88 | -1,85 | 0,02280 | NM_014589    | KRTAP7-1   |
| 8069868 | -1,57 | -2,97 | 0,11453 | -1,33 | -2,51 | 0,01922 | NM_181606    | C9orf25    |
| 8160805 | -1,57 | -2,97 | 0,01303 | -1,00 | -2,01 | 0,03261 | NM_147202    | MYOD1      |
| 7938730 | -1,57 | -2,97 | 0,01775 | -1,92 | -3,77 | 0,00084 | NM_002478    | RASA4      |
| 8139270 | -1,57 | -2,98 | 0,03406 | 0,10  | 1,07  | 0,79696 | NM_006989    | HOXB13     |
| 8016487 | -1,57 | -2,98 | 0,06216 | -1,37 | -2,59 | 0,02624 | NM_006361    | KCP        |
| 8142821 | -1,57 | -2,98 | 0,01304 | -1,27 | -2,42 | 0,00422 | NM_001135914 | ---        |
| 7919324 | -1,57 | -2,98 | 0,22578 | -3,03 | -8,17 | 0,00118 | ---          | ---        |
| 7977951 | -1,57 | -2,98 | 0,00032 | -1,63 | -3,10 | 0,00045 | ---          | ---        |
| 8120820 | -1,58 | -2,98 | 0,08966 | -1,55 | -2,93 | 0,02524 | ---          | MAP3K14    |
| 8007790 | -1,58 | -2,98 | 0,01935 | -1,15 | -2,22 | 0,07062 | NM_003954    | VN1R4      |
| 8039075 | -1,58 | -2,98 | 0,00260 | -1,19 | -2,29 | 0,00020 | NM_173857    | ---        |
| 8165932 | -1,58 | -2,98 | 0,04271 | -1,44 | -2,72 | 0,00047 | ---          | LRRC15     |
| 8092839 | -1,58 | -2,98 | 0,01222 | -2,31 | -4,95 | 0,00715 | NM_001135057 | ---        |
| 8161190 | -1,58 | -2,98 | 0,08914 | -0,23 | -1,17 | 0,30642 | ---          | LIN7B      |
| 8030212 | -1,58 | -2,98 | 0,01746 | -0,95 | -1,93 | 0,04703 | NM_022165    | KIAA2022   |
| 8173621 | -1,58 | -2,98 | 0,00070 | -0,41 | -1,33 | 0,11238 | NM_001008537 | OTOP1      |
| 8099093 | -1,58 | -2,99 | 0,05649 | -1,57 | -2,97 | 0,02767 | NM_177998    | KLK9       |
| 8038716 | -1,58 | -2,99 | 0,02363 | -0,52 | -1,44 | 0,14012 | NM_012315    | IL11       |
| 8039484 | -1,58 | -2,99 | 0,00252 | -1,06 | -2,08 | 0,00631 | NM_000641    | FBXL16     |
| 7998297 | -1,58 | -2,99 | 0,02666 | -0,52 | -1,43 | 0,29817 | NM_153350    | ---        |
| 8073328 | -1,58 | -2,99 | 0,01612 | -1,93 | -3,80 | 0,00000 | ---          | FLJ30901   |
| 8076584 | -1,58 | -2,99 | 0,04330 | -1,18 | -2,27 | 0,00453 | AK056490     | HIST1H2BB  |
| 8124394 | -1,58 | -2,99 | 0,01364 | -1,54 | -2,91 | 0,02052 | NM_021062    | ---        |
| 8069764 | -1,58 | -2,99 | 0,04599 | -2,98 | -7,91 | 0,00004 | ---          | MRGPRE     |
| 7945859 | -1,58 | -2,99 | 0,10286 | -1,64 | -3,12 | 0,08511 | NM_001039165 | ---        |
| 8078012 | -1,58 | -2,99 | 0,04962 | -1,03 | -2,04 | 0,02774 | ---          | FAM55A     |
| 7951789 | -1,58 | -2,99 | 0,03124 | -1,71 | -3,28 | 0,00234 | NM_152315    | OR5111     |
| 7946073 | -1,58 | -2,99 | 0,02946 | -1,70 | -3,26 | 0,00936 | NM_001005288 | C17orf55   |
| 8019170 | -1,58 | -2,99 | 0,02963 | -1,55 | -2,93 | 0,01750 | BC108932     | PRM2       |
| 7999435 | -1,58 | -2,99 | 0,02188 | -1,04 | -2,06 | 0,01315 | NM_002762    | PRLH       |
| 8049509 | -1,58 | -2,99 | 0,05289 | -1,49 | -2,82 | 0,03633 | NM_015893    | MPV17L     |
| 7993453 | -1,58 | -2,99 | 0,04504 | 2,14  | 4,41  | 0,00068 | NM_001128423 | CT47A6     |
| 8174853 | -1,58 | -2,99 | 0,12448 | -1,51 | -2,84 | 0,04280 | NM_001080141 | ---        |
| 8046016 | -1,58 | -2,99 | 0,02348 | -1,29 | -2,45 | 0,00089 | ---          | ---        |
| 8162140 | -1,58 | -2,99 | 0,06446 | -0,94 | -1,91 | 0,04479 | ---          | MYCN       |
| 8040419 | -1,58 | -2,99 | 0,00246 | -1,47 | -2,77 | 0,00430 | NM_005378    | PIWIL1     |
| 7959856 | -1,58 | -3,00 | 0,07275 | -1,48 | -2,78 | 0,00141 | NM_004764    | NCRNA00115 |
| 7911351 | -1,58 | -3,00 | 0,01183 | -1,98 | -3,94 | 0,00289 | NR_024321    | B3GNT8     |
| 8037032 | -1,58 | -3,00 | 0,03476 | -2,14 | -4,42 | 0,00071 | NM_198540    | SCNN1G     |
| 7994058 | -1,58 | -3,00 | 0,00525 | -1,55 | -2,93 | 0,00226 | NM_001039    | PLEKHG5    |
| 7912056 | -1,58 | -3,00 | 0,00018 | -0,43 | -1,34 | 0,11876 | NM_198681    | PIF1       |
| 7989680 | -1,58 | -3,00 | 0,00311 | -1,09 | -2,13 | 0,00123 | NM_025049    | GAS2L1     |
| 8072216 | -1,58 | -3,00 | 0,01791 | -1,31 | -2,48 | 0,00974 | NM_006478    | ---        |

|         |       |       |         |       |       |         |                 |           |              |
|---------|-------|-------|---------|-------|-------|---------|-----------------|-----------|--------------|
| 8101226 | -1,58 | -3,00 | 0,00509 | -1,33 | -2,52 | 0,01899 | ---             | GHRL      |              |
| 8085293 | -1,58 | -3,00 | 0,00506 | -1,57 | -2,96 | 0,00260 | NR_024138       |           | HSH2D        |
| 8026533 | -1,58 | -3,00 | 0,01686 | -0,51 | -1,42 | 0,20416 | NM_032855       |           | ---          |
| 7942989 | -1,59 | -3,00 | 0,01026 | -2,46 | -5,50 | 0,00402 | ---             | CXCR2     |              |
| 8048227 | -1,59 | -3,00 | 0,03614 | -1,33 | -2,51 | 0,05354 | NM_001557       |           | ---          |
| 8077942 | -1,59 | -3,00 | 0,03322 | -1,60 | -3,02 | 0,01222 | ---             | RIMKLA    |              |
| 7900540 | -1,59 | -3,00 | 0,01808 | 0,19  | 1,14  | 0,66160 | NM_173642       |           | HMP19        |
| 8110074 | -1,59 | -3,00 | 0,00806 | -0,86 | -1,81 | 0,00984 | NM_015980       |           | ---          |
| 7916022 | -1,59 | -3,00 | 0,03187 | -0,33 | -1,26 | 0,71387 | ---             | C1orf9    |              |
| 7940530 | -1,59 | -3,00 | 0,00305 | 1,32  | 2,49  | 0,01310 | NM_001127392    |           | SLC25A4      |
| 8098576 | -1,59 | -3,00 | 0,00075 | 1,06  | 2,08  | 0,07079 | NM_001151       |           | SOX11        |
| 8040070 | -1,59 | -3,00 | 0,00443 | -1,39 | -2,62 | 0,00289 | NM_003108       |           | ---          |
| 8079628 | -1,59 | -3,00 | 0,00416 | -1,53 | -2,89 | 0,00679 | ---             | DLX3      |              |
| 8016609 | -1,59 | -3,00 | 0,01772 | -1,70 | -3,24 | 0,00000 | NM_005220       |           | LHB          |
| 8038278 | -1,59 | -3,00 | 0,06355 | -1,23 | -2,35 | 0,00337 | NM_000894       |           | ---          |
| 7947184 | -1,59 | -3,01 | 0,00552 | -1,05 | -2,07 | 0,01628 | ---             | ---       |              |
| 7974562 | -1,59 | -3,01 | 0,04747 | -1,75 | -3,36 | 0,00096 | ---             | CLEC11A   |              |
| 8030721 | -1,59 | -3,01 | 0,01234 | -1,31 | -2,49 | 0,00275 | NM_002975       |           | ---          |
| 8085772 | -1,59 | -3,01 | 0,00745 | -1,95 | -3,85 | 0,00229 | ---             | ZNF277    |              |
| 8135512 | -1,59 | -3,01 | 0,01252 | -1,31 | -2,48 | 0,00898 | ENST00000421043 |           | CXorf25      |
| 8167195 | -1,59 | -3,01 | 0,00856 | -2,05 | -4,14 | 0,00497 | ENST00000338197 |           | RAX2         |
| 8032601 | -1,59 | -3,01 | 0,01550 | -2,50 | -5,66 | 0,00728 | NM_032753       |           | ---          |
| 7979925 | -1,59 | -3,01 | 0,00572 | -0,81 | -1,76 | 0,03228 | ---             | ---       |              |
| 8145438 | -1,59 | -3,01 | 0,00166 | -1,80 | -3,48 | 0,00055 | ---             | C6orf227  |              |
| 8125772 | -1,59 | -3,01 | 0,00356 | -1,38 | -2,60 | 0,00408 | NR_027908       |           | HS3ST2       |
| 7994052 | -1,59 | -3,01 | 0,05646 | -2,54 | -5,82 | 0,00842 | NM_006043       |           | PLCXD2       |
| 8081582 | -1,59 | -3,01 | 0,04835 | -0,68 | -1,60 | 0,09235 | NM_153268       |           | SCO2         |
| 8077099 | -1,59 | -3,01 | 0,01501 | -1,88 | -3,67 | 0,02742 | NM_005138       |           | MGC39584     |
| 8104131 | -1,59 | -3,01 | 0,17310 | -1,51 | -2,85 | 0,11026 | ENST00000400767 |           | LOC100131510 |
| 8050844 | -1,59 | -3,01 | 0,05002 | -0,55 | -1,46 | 0,25290 | AF052121        |           | C21orf67     |
| 8070853 | -1,59 | -3,01 | 0,02845 | -0,93 | -1,91 | 0,00450 | NR_027129       |           | COL23A1      |
| 8116195 | -1,59 | -3,01 | 0,00423 | -2,04 | -4,11 | 0,00092 | NM_173465       |           | C1QTNF5      |
| 7952243 | -1,59 | -3,01 | 0,04027 | -2,82 | -7,07 | 0,00067 | NM_015645       |           | SGPP2        |
| 8048717 | -1,59 | -3,02 | 0,03406 | 2,00  | 3,99  | 0,00142 | NM_152386       |           | ---          |
| 8085253 | -1,59 | -3,02 | 0,00580 | -2,24 | -4,73 | 0,01115 | ---             | ALX4      |              |
| 7947563 | -1,59 | -3,02 | 0,03959 | -1,48 | -2,79 | 0,09065 | NM_021926       |           | LCN9         |
| 8159275 | -1,59 | -3,02 | 0,00083 | -1,78 | -3,42 | 0,01476 | NM_001001676    |           | SERPINA1     |
| 7981068 | -1,59 | -3,02 | 0,00752 | -0,62 | -1,53 | 0,46748 | NM_001002236    |           | FAM108A1     |
| 7924230 | -1,59 | -3,02 | 0,02316 | -0,50 | -1,41 | 0,39299 | NM_001130111    |           | MIRLET7A3    |
| 8073822 | -1,59 | -3,02 | 0,01513 | -0,96 | -1,94 | 0,00872 | NR_029478       |           | TEF          |
| 8073422 | -1,59 | -3,02 | 0,03417 | -1,42 | -2,67 | 0,09193 | NM_003216       |           | GRM4         |
| 8125805 | -1,59 | -3,02 | 0,01378 | -1,04 | -2,05 | 0,03445 | NM_000841       |           | C8orf49      |
| 8144656 | -1,59 | -3,02 | 0,23183 | -0,12 | -1,08 | 0,81887 | BC132945        |           | ---          |
| 8058971 | -1,60 | -3,02 | 0,02558 | -1,83 | -3,56 | 0,02440 | ---             | NUP210    |              |
| 8085431 | -1,60 | -3,02 | 0,01371 | 4,01  | 16,11 | 0,00057 | NM_024923       |           | PIRT         |
| 8012837 | -1,60 | -3,02 | 0,00259 | -1,83 | -3,56 | 0,00010 | NM_001101387    |           | ---          |
| 8138706 | -1,60 | -3,02 | 0,04830 | -2,94 | -7,65 | 0,00001 | ---             | FLJ11235  |              |
| 8107328 | -1,60 | -3,02 | 0,01686 | -1,90 | -3,72 | 0,01125 | NR_027706       |           | ---          |
| 8055137 | -1,60 | -3,02 | 0,00560 | -1,41 | -2,66 | 0,00031 | ---             | ZNF707    |              |
| 8148662 | -1,60 | -3,02 | 0,01571 | -1,01 | -2,01 | 0,02340 | NM_173831       |           | ---          |
| 8071593 | -1,60 | -3,02 | 0,02764 | -2,87 | -7,31 | 0,00699 | ---             | ---       |              |
| 8130622 | -1,60 | -3,02 | 0,02764 | -2,87 | -7,31 | 0,00699 | ---             | C1orf222  |              |
| 7911643 | -1,60 | -3,02 | 0,14612 | -1,31 | -2,48 | 0,12692 | BC114926        |           | ---          |
| 7981240 | -1,60 | -3,02 | 0,01079 | -1,68 | -3,21 | 0,00009 | ---             | ---       |              |
| 7981233 | -1,60 | -3,03 | 0,00166 | -1,59 | -3,01 | 0,00223 | ---             | CSF3      |              |
| 8006999 | -1,60 | -3,03 | 0,05629 | -2,33 | -5,04 | 0,00020 | NM_172220       |           | LTA          |
| 8177976 | -1,60 | -3,03 | 0,01530 | -0,98 | -1,98 | 0,00573 | NM_000595       |           | CHRNA4       |
| 8067610 | -1,60 | -3,03 | 0,00181 | -1,15 | -2,21 | 0,01728 | NM_000744       |           | ALDH16A1     |
| 8030321 | -1,60 | -3,03 | 0,02838 | -0,90 | -1,87 | 0,18011 | NM_153329       |           | EHBP1L1      |
| 7949440 | -1,60 | -3,03 | 0,04546 | -1,94 | -3,85 | 0,00607 | NM_001099409    |           | GSX1         |
| 7968260 | -1,60 | -3,03 | 0,03040 | -1,77 | -3,41 | 0,01724 | NM_145657       |           | MECOM        |
| 8091991 | -1,60 | -3,03 | 0,01880 | -2,22 | -4,67 | 0,00391 | NM_004991       |           | POM121L12    |
| 8132840 | -1,60 | -3,03 | 0,00010 | -2,26 | -4,79 | 0,00002 | NM_182595       |           | CSAG1        |
| 8170576 | -1,60 | -3,03 | 0,03130 | -1,60 | -3,03 | 0,02051 | NM_153478       |           | LGALS7       |
| 8036584 | -1,60 | -3,03 | 0,00256 | -0,91 | -1,88 | 0,10103 | NM_002307       |           | C3orf22      |
| 8090388 | -1,60 | -3,03 | 0,00025 | -1,64 | -3,13 | 0,02244 | BC032025        |           | ---          |
| 8083935 | -1,60 | -3,04 | 0,00680 | -0,56 | -1,48 | 0,07757 | ---             | MIRLET7A1 |              |
| 8156519 | -1,60 | -3,04 | 0,00031 | -1,29 | -2,44 | 0,00122 | NR_029476       |           | C8orf77      |
| 8148951 | -1,60 | -3,04 | 0,03018 | -0,82 | -1,77 | 0,04842 | NR_026974       |           | TTY7         |
| 8176435 | -1,60 | -3,04 | 0,00115 | -1,91 | -3,75 | 0,01051 | NR_001534       |           | TTY7         |
| 8177101 | -1,60 | -3,04 | 0,00115 | -1,91 | -3,75 | 0,01051 | NR_001534       |           | EME2         |
| 7992379 | -1,60 | -3,04 | 0,02577 | -1,15 | -2,21 | 0,05392 | NM_001010865    |           | C2orf55      |
| 8054154 | -1,60 | -3,04 | 0,01103 | -2,09 | -4,27 | 0,00049 | NM_207362       |           | DLEU7        |

|         |       |       |         |       |       |         |                 |              |
|---------|-------|-------|---------|-------|-------|---------|-----------------|--------------|
| 7971663 | -1,60 | -3,04 | 0,12469 | -1,85 | -3,61 | 0,00276 | NM_198989       | SPTBN2       |
| 7949679 | -1,60 | -3,04 | 0,00110 | 1,09  | 2,12  | 0,02170 | NM_006946       | ---          |
| 8173915 | -1,60 | -3,04 | 0,03380 | -1,90 | -3,73 | 0,00152 | ---             | ---          |
| 8072358 | -1,60 | -3,04 | 0,00312 | -1,15 | -2,22 | 0,00014 | ---             | ---          |
| 8081111 | -1,60 | -3,04 | 0,01451 | -0,92 | -1,89 | 0,00718 | ---             | AGXT         |
| 8049737 | -1,60 | -3,04 | 0,01179 | -1,02 | -2,03 | 0,00127 | NM_000030       | MATN4        |
| 8066498 | -1,60 | -3,04 | 0,00788 | -1,71 | -3,27 | 0,00406 | NM_003833       | ---          |
| 7964699 | -1,60 | -3,04 | 0,01578 | -1,11 | -2,16 | 0,00011 | ---             | ---          |
| 8121416 | -1,60 | -3,04 | 0,34586 | -2,59 | -6,04 | 0,00777 | ---             | ---          |
| 7972257 | -1,60 | -3,04 | 0,02562 | -2,61 | -6,09 | 0,00117 | ---             | ---          |
| 8082240 | -1,61 | -3,04 | 0,29664 | -0,55 | -1,46 | 0,11160 | ---             | ---          |
| 8098877 | -1,61 | -3,04 | 0,00310 | -1,33 | -2,52 | 0,10254 | ---             | ---          |
| 8074061 | -1,61 | -3,04 | 0,00052 | -1,16 | -2,23 | 0,09607 | ---             | GPC2         |
| 8141463 | -1,61 | -3,04 | 0,10286 | -1,90 | -3,73 | 0,01794 | NM_152742       | ---          |
| 8126369 | -1,61 | -3,04 | 0,00303 | -2,21 | -4,63 | 0,00024 | ---             | XKR3         |
| 8074204 | -1,61 | -3,04 | 0,00817 | -1,10 | -2,14 | 0,00562 | NM_175878       | LIMD2        |
| 8017393 | -1,61 | -3,04 | 0,00767 | -1,19 | -2,27 | 0,02904 | NM_030576       | RSAD1        |
| 8008339 | -1,61 | -3,04 | 0,05070 | -0,15 | -1,11 | 0,82992 | NM_018346       | ---          |
| 8013987 | -1,61 | -3,05 | 0,03606 | -1,63 | -3,11 | 0,00826 | ---             | ---          |
| 8151030 | -1,61 | -3,05 | 0,02991 | -0,57 | -1,49 | 0,04313 | ---             | ---          |
| 7983777 | -1,61 | -3,05 | 0,01146 | -1,65 | -3,13 | 0,00134 | ---             | UPB1         |
| 8071907 | -1,61 | -3,05 | 0,01759 | -1,13 | -2,18 | 0,02783 | NM_016327       | ---          |
| 8115939 | -1,61 | -3,05 | 0,03542 | -1,68 | -3,20 | 0,05211 | ---             | ABO          |
| 8164853 | -1,61 | -3,05 | 0,03714 | 0,24  | 1,18  | 0,12550 | NM_020469       | VSIG2        |
| 7952426 | -1,61 | -3,05 | 0,00159 | -1,63 | -3,09 | 0,00188 | NM_014312       | ---          |
| 8153069 | -1,61 | -3,05 | 0,00876 | -1,47 | -2,77 | 0,07430 | ---             | NCRNA00114   |
| 8070315 | -1,61 | -3,05 | 0,04252 | -1,25 | -2,38 | 0,01213 | AY204749        | CRNN         |
| 7920178 | -1,61 | -3,05 | 0,00055 | -1,85 | -3,60 | 0,02156 | NM_016190       | SKAP1        |
| 8016414 | -1,61 | -3,05 | 0,00048 | 0,57  | 1,49  | 0,10596 | NM_003726       | ---          |
| 8048699 | -1,61 | -3,05 | 0,20430 | -1,54 | -2,92 | 0,04814 | ---             | NKX2-1       |
| 7978676 | -1,61 | -3,05 | 0,02256 | -0,62 | -1,53 | 0,20730 | NM_003317       | VWCE         |
| 7948511 | -1,61 | -3,05 | 0,02313 | -2,04 | -4,12 | 0,01641 | NM_152718       | NKX1-2       |
| 7936882 | -1,61 | -3,05 | 0,01689 | -1,18 | -2,27 | 0,08802 | NM_001146340    | LCE1D        |
| 7905523 | -1,61 | -3,05 | 0,04608 | -2,58 | -6,00 | 0,02008 | NM_178352       | MIR184       |
| 7985236 | -1,61 | -3,06 | 0,00075 | -1,11 | -2,15 | 0,00053 | NR_029705       | APOC2        |
| 8029551 | -1,61 | -3,06 | 0,02180 | -2,09 | -4,26 | 0,00602 | NM_000483       | C17orf64     |
| 8008914 | -1,61 | -3,06 | 0,04500 | -1,96 | -3,90 | 0,00035 | NM_181707       | FGF8         |
| 7935892 | -1,61 | -3,06 | 0,02041 | -0,70 | -1,62 | 0,09658 | NM_033163       | ---          |
| 8176667 | -1,61 | -3,06 | 0,03181 | -2,00 | -4,00 | 0,00112 | ---             | ---          |
| 8177191 | -1,61 | -3,06 | 0,03181 | -2,00 | -4,00 | 0,00112 | ---             | FLJ35409     |
| 7917942 | -1,61 | -3,06 | 0,00197 | -0,94 | -1,92 | 0,14011 | AK092728        | KLK3         |
| 8030753 | -1,61 | -3,06 | 0,06223 | -2,04 | -4,10 | 0,00112 | NM_001030047    | ---          |
| 7900652 | -1,61 | -3,06 | 0,07048 | -2,70 | -6,52 | 0,00035 | ---             | C11orf76     |
| 7942228 | -1,61 | -3,06 | 0,02348 | -1,24 | -2,36 | 0,00273 | BC004224        | ---          |
| 8058159 | -1,61 | -3,06 | 0,01423 | -1,24 | -2,36 | 0,03175 | ---             | ---          |
| 8172156 | -1,61 | -3,06 | 0,00586 | -2,21 | -4,62 | 0,00666 | ---             | LOC80154     |
| 7990902 | -1,61 | -3,06 | 0,02669 | 0,98  | 1,97  | 0,08934 | NR_026811       | ---          |
| 8136138 | -1,61 | -3,06 | 0,01400 | -1,89 | -3,70 | 0,00086 | ---             | TRIM73       |
| 8139966 | -1,61 | -3,06 | 0,02497 | -1,20 | -2,29 | 0,04137 | NM_198924       | RUNDC2C      |
| 7994572 | -1,61 | -3,06 | 0,01272 | -0,03 | -1,02 | 0,95869 | NR_002939       | EBI3         |
| 8024792 | -1,62 | -3,06 | 0,02454 | -0,78 | -1,72 | 0,04155 | NM_005755       | ---          |
| 8016519 | -1,62 | -3,06 | 0,00035 | -1,78 | -3,43 | 0,00486 | ---             | CCDC11       |
| 8023314 | -1,62 | -3,07 | 0,00037 | -1,16 | -2,23 | 0,06418 | NM_145020       | OR51H1P      |
| 7946006 | -1,62 | -3,07 | 0,12003 | -2,38 | -5,22 | 0,00393 | ENST00000322059 | CCL27        |
| 8160870 | -1,62 | -3,07 | 0,02389 | -2,09 | -4,25 | 0,00034 | NM_006664       | ---          |
| 8129377 | -1,62 | -3,07 | 0,00343 | -2,02 | -4,06 | 0,00002 | ---             | ---          |
| 8000882 | -1,62 | -3,07 | 0,04482 | -2,12 | -4,35 | 0,00013 | ---             | SNORD115-3   |
| 7982012 | -1,62 | -3,07 | 0,02444 | -0,68 | -1,60 | 0,00097 | NR_003295       | UBL4B        |
| 7903851 | -1,62 | -3,07 | 0,01778 | -1,73 | -3,33 | 0,02669 | NM_203412       | ---          |
| 8061445 | -1,62 | -3,07 | 0,04581 | -3,22 | -9,35 | 0,00201 | ---             | COX6A2       |
| 8001041 | -1,62 | -3,07 | 0,03305 | -2,35 | -5,11 | 0,02093 | NM_005205       | LOC100129113 |
| 8074307 | -1,62 | -3,07 | 0,04007 | -1,46 | -2,76 | 0,01103 | AK094477        | APLP1        |
| 8028084 | -1,62 | -3,07 | 0,00242 | 0,54  | 1,46  | 0,20736 | NM_001024807    | PCP4L1       |
| 7906742 | -1,62 | -3,07 | 0,13550 | -1,17 | -2,25 | 0,05133 | NM_001102566    | LEMD1        |
| 7923772 | -1,62 | -3,07 | 0,01644 | -0,72 | -1,65 | 0,07735 | NM_001001552    | ALPPL2       |
| 8049128 | -1,62 | -3,07 | 0,01613 | -1,92 | -3,79 | 0,11100 | NM_031313       | SIRT7        |
| 8019296 | -1,62 | -3,07 | 0,01522 | -0,47 | -1,39 | 0,44966 | NM_016538       | ---          |
| 7967792 | -1,62 | -3,07 | 0,00445 | -2,02 | -4,06 | 0,00658 | ---             | C10orf96     |
| 7930750 | -1,62 | -3,07 | 0,00000 | -1,70 | -3,26 | 0,00049 | NM_198515       | FAM99A       |
| 7945660 | -1,62 | -3,07 | 0,01565 | -2,29 | -4,90 | 0,01178 | NR_026643       | PDHA2        |
| 8096528 | -1,62 | -3,07 | 0,01606 | -2,10 | -4,28 | 0,00167 | NM_005390       | LOC100130285 |
| 7998265 | -1,62 | -3,07 | 0,06169 | -1,25 | -2,37 | 0,00574 | AK097604        | LOC442381    |
| 8149396 | -1,62 | -3,07 | 0,04955 | -1,20 | -2,29 | 0,08014 | ENST00000358192 | NCRNA00176   |

|         |       |       |         |       |        |         |                 |            |
|---------|-------|-------|---------|-------|--------|---------|-----------------|------------|
| 8064242 | -1,62 | -3,07 | 0,10305 | -2,45 | -5,48  | 0,00829 | NR_027686       | C3orf18    |
| 8087731 | -1,62 | -3,07 | 0,02762 | -0,85 | -1,81  | 0,17308 | NM_016210       | GADD45GIP1 |
| 8034605 | -1,62 | -3,08 | 0,00192 | -1,01 | -2,01  | 0,02781 | NM_052850       | RNF43      |
| 8016994 | -1,62 | -3,08 | 0,02375 | 1,96  | 3,90   | 0,00279 | NM_017763       | ---        |
| 7964658 | -1,62 | -3,08 | 0,06330 | -2,46 | -5,49  | 0,00449 | --- MEG3        | ---        |
| 7976795 | -1,62 | -3,08 | 0,00013 | -2,27 | -4,82  | 0,00395 | NR_003530       | MOBK12C    |
| 7915861 | -1,62 | -3,08 | 0,00802 | -1,23 | -2,34  | 0,00072 | NM_145279       | TULP2      |
| 8038246 | -1,62 | -3,08 | 0,00730 | -1,16 | -2,23  | 0,03067 | NM_003323       | OR51Q1     |
| 7938004 | -1,62 | -3,08 | 0,01087 | -1,13 | -2,19  | 0,00093 | NM_001004757    | ---        |
| 7934850 | -1,62 | -3,08 | 0,05029 | -2,66 | -6,34  | 0,00030 | ---             | ---        |
| 8157798 | -1,62 | -3,08 | 0,00380 | -3,39 | -10,50 | 0,00074 | --- C1orf14     | ---        |
| 7922737 | -1,62 | -3,08 | 0,01152 | -1,31 | -2,48  | 0,00323 | NM_030933       | IQSEC3     |
| 8067820 | -1,62 | -3,08 | 0,02949 | -1,90 | -3,72  | 0,01407 | NM_001170738    | COL27A1    |
| 8157383 | -1,62 | -3,08 | 0,00498 | -1,15 | -2,22  | 0,01299 | NM_032888       | ---        |
| 7972016 | -1,62 | -3,08 | 0,11640 | -0,66 | -1,58  | 0,20999 | --- FAM83G      | ---        |
| 8013312 | -1,62 | -3,08 | 0,02648 | -0,63 | -1,55  | 0,25459 | NM_001039999    | MPPED1     |
| 8073623 | -1,62 | -3,08 | 0,03254 | -1,54 | -2,92  | 0,00133 | NM_001044370    | C5orf17    |
| 8104643 | -1,63 | -3,09 | 0,08167 | -1,46 | -2,76  | 0,02067 | AK092155 SPINT1 | ---        |
| 7982829 | -1,63 | -3,09 | 0,02291 | 3,63  | 12,42  | 0,00032 | NM_181642       | OR2B11     |
| 7925718 | -1,63 | -3,09 | 0,00276 | -2,12 | -4,34  | 0,00096 | NM_001004492    | DBX1       |
| 7947129 | -1,63 | -3,09 | 0,02793 | -1,04 | -2,05  | 0,02489 | NM_001029865    | FLJ36116   |
| 7918620 | -1,63 | -3,09 | 0,05826 | -0,20 | -1,15  | 0,70241 | AK093435 NKX3-2 | ---        |
| 8099406 | -1,63 | -3,09 | 0,00612 | -0,73 | -1,66  | 0,11149 | NM_001189       | LOC158960  |
| 8176091 | -1,63 | -3,09 | 0,01625 | -3,63 | -12,35 | 0,00030 | BC009467 KCTD8  | ---        |
| 8100070 | -1,63 | -3,09 | 0,00622 | -1,91 | -3,76  | 0,00258 | NM_198353       | ZNF205     |
| 7992845 | -1,63 | -3,09 | 0,01214 | -1,24 | -2,36  | 0,03038 | NM_003456       | C9orf4     |
| 8163109 | -1,63 | -3,09 | 0,03211 | -1,54 | -2,90  | 0,00056 | NM_014334       | ---        |
| 7910913 | -1,63 | -3,09 | 0,00962 | -1,11 | -2,16  | 0,07646 | ---             | ---        |
| 7919562 | -1,63 | -3,09 | 0,04388 | -1,76 | -3,38  | 0,01463 | ---             | ---        |
| 8043482 | -1,63 | -3,09 | 0,04388 | -1,76 | -3,38  | 0,01463 | ---             | ---        |
| 8148261 | -1,63 | -3,09 | 0,03171 | -2,58 | -5,96  | 0,00032 | --- MAFG        | ---        |
| 8019798 | -1,63 | -3,09 | 0,00704 | -0,87 | -1,83  | 0,22788 | NM_032711       | C19orf40   |
| 8027510 | -1,63 | -3,09 | 0,00219 | 0,94  | 1,92   | 0,04525 | NM_152266       | FAM59B     |
| 8040632 | -1,63 | -3,09 | 0,00962 | -1,08 | -2,11  | 0,06453 | NM_001168241    | CACNG7     |
| 8031076 | -1,63 | -3,09 | 0,02582 | -1,78 | -3,43  | 0,04691 | NM_031896       | BARHL2     |
| 7917599 | -1,63 | -3,09 | 0,02327 | -0,44 | -1,35  | 0,05980 | NM_020063       | ---        |
| 8165680 | -1,63 | -3,09 | 0,02680 | -2,82 | -7,04  | 0,00156 | ---             | ---        |
| 7978710 | -1,63 | -3,09 | 0,00527 | -2,06 | -4,17  | 0,00097 | --- BTBD11      | ---        |
| 7958377 | -1,63 | -3,09 | 0,01861 | -2,00 | -3,99  | 0,00008 | AK124835 SGCA   | ---        |
| 8008277 | -1,63 | -3,09 | 0,01218 | -1,74 | -3,35  | 0,00063 | NM_000023       | ---        |
| 8070255 | -1,63 | -3,09 | 0,02474 | -1,61 | -3,04  | 0,02046 | --- IRF2BP1     | ---        |
| 8037723 | -1,63 | -3,09 | 0,00611 | -1,39 | -2,62  | 0,02571 | NM_015649       | LDLRAD2    |
| 7898707 | -1,63 | -3,09 | 0,02090 | -2,75 | -6,71  | 0,00016 | NM_001013693    | ---        |
| 7933945 | -1,63 | -3,09 | 0,05961 | -1,20 | -2,30  | 0,03443 | --- KCNK12      | ---        |
| 8052018 | -1,63 | -3,09 | 0,05093 | -1,69 | -3,23  | 0,01615 | NM_022055       | BTNL9      |
| 8110631 | -1,63 | -3,09 | 0,00197 | -0,77 | -1,70  | 0,08636 | NM_152547       | ---        |
| 8110616 | -1,63 | -3,09 | 0,00271 | -1,61 | -3,05  | 0,00160 | --- TXNRD2      | ---        |
| 8074498 | -1,63 | -3,09 | 0,00854 | -0,51 | -1,42  | 0,21811 | NM_006440       | SULT2B1    |
| 8030067 | -1,63 | -3,09 | 0,02284 | -1,13 | -2,19  | 0,06703 | NM_004605       | CCL22      |
| 7996022 | -1,63 | -3,10 | 0,02706 | -1,55 | -2,92  | 0,09716 | NM_002990       | C1orf159   |
| 7911383 | -1,63 | -3,10 | 0,01098 | -1,76 | -3,38  | 0,00148 | NM_017891       | DAND5      |
| 8026133 | -1,63 | -3,10 | 0,00293 | -1,59 | -3,00  | 0,04657 | NM_152654       | DPPA5      |
| 8127522 | -1,63 | -3,10 | 0,05969 | -1,90 | -3,73  | 0,00010 | NM_001025290    | RAB42      |
| 7899499 | -1,63 | -3,10 | 0,10902 | -0,26 | -1,19  | 0,40187 | NM_152304       | IQSEC3     |
| 7952893 | -1,63 | -3,10 | 0,02481 | -1,90 | -3,74  | 0,00948 | NM_001170738    | CEBPA      |
| 8036004 | -1,63 | -3,10 | 0,00436 | -1,28 | -2,43  | 0,00968 | NM_004364       | WNT9B      |
| 8007895 | -1,63 | -3,10 | 0,00666 | -1,43 | -2,69  | 0,00044 | NM_003396       | ZNF385C    |
| 8015503 | -1,63 | -3,10 | 0,00835 | -1,30 | -2,47  | 0,02725 | BC080613 ---    | ---        |
| 8111668 | -1,63 | -3,10 | 0,00005 | -1,18 | -2,26  | 0,01013 | --- NR2C2AP     | ---        |
| 8035628 | -1,63 | -3,10 | 0,00002 | 1,21  | 2,32   | 0,02109 | NM_176880       | GPR25      |
| 7908637 | -1,63 | -3,10 | 0,00203 | -0,83 | -1,78  | 0,18660 | NM_005298       | LY6K       |
| 8148553 | -1,63 | -3,10 | 0,00781 | 2,69  | 6,48   | 0,00009 | NM_017527       | FSD1       |
| 8024816 | -1,63 | -3,10 | 0,02203 | -1,20 | -2,29  | 0,00395 | NM_024333       | ---        |
| 8140035 | -1,63 | -3,10 | 0,11860 | -2,13 | -4,37  | 0,02596 | --- TFEC        | ---        |
| 8142452 | -1,63 | -3,10 | 0,02447 | -0,94 | -1,92  | 0,00860 | NM_012252       | SHISA7     |
| 8039504 | -1,63 | -3,10 | 0,02478 | -1,89 | -3,70  | 0,00099 | NM_001145176    | CELF6      |
| 7990191 | -1,63 | -3,10 | 0,01794 | -1,72 | -3,30  | 0,00053 | NM_052840       | ---        |
| 8175583 | -1,63 | -3,10 | 0,05709 | -1,13 | -2,18  | 0,00654 | --- OR2A14      | ---        |
| 8136975 | -1,63 | -3,10 | 0,00016 | -1,96 | -3,90  | 0,00015 | NM_001001659    | CALCA      |
| 7946749 | -1,63 | -3,10 | 0,07631 | -1,97 | -3,91  | 0,01391 | NM_001741       | ---        |
| 7917470 | -1,63 | -3,10 | 0,03701 | -2,35 | -5,11  | 0,00332 | ---             | ---        |
| 8124158 | -1,63 | -3,11 | 0,07297 | -0,49 | -1,41  | 0,12871 | --- HCP5        | ---        |
| 8118111 | -1,63 | -3,11 | 0,00524 | 0,08  | 1,06   | 0,81684 | NM_006674       | ZNF843     |

|         |       |       |         |       |        |         |                  |              |
|---------|-------|-------|---------|-------|--------|---------|------------------|--------------|
| 8001046 | -1,63 | -3,11 | 0,03408 | -2,57 | -5,94  | 0,00003 | NM_001136509     | CSPG5        |
| 8086799 | -1,63 | -3,11 | 0,00078 | -0,98 | -1,97  | 0,02068 | NM_006574        | PSAPL1       |
| 8099255 | -1,64 | -3,11 | 0,04234 | -1,17 | -2,25  | 0,03134 | NM_001085382     | FAM132B      |
| 8049620 | -1,64 | -3,11 | 0,00682 | -1,29 | -2,44  | 0,02878 | ENST00000408994  | NTSR2        |
| 8050352 | -1,64 | -3,11 | 0,01677 | -1,72 | -3,29  | 0,01301 | NM_012344        | PAEP         |
| 8159265 | -1,64 | -3,11 | 0,00762 | -2,53 | -5,76  | 0,00041 | NM_001018049     | LOC100132217 |
| 8133027 | -1,64 | -3,11 | 0,29913 | -4,18 | -18,08 | 0,00002 | AK128836         | ---          |
| 8129375 | -1,64 | -3,11 | 0,04492 | -3,06 | -8,33  | 0,00081 | --- CDH22        | ---          |
| 8066683 | -1,64 | -3,11 | 0,04586 | -0,85 | -1,80  | 0,03976 | NM_021248        | ---          |
| 8052583 | -1,64 | -3,11 | 0,00555 | -2,59 | -6,04  | 0,00001 | --- ODF3L2       | ---          |
| 8032051 | -1,64 | -3,11 | 0,03057 | -1,69 | -3,23  | 0,00383 | NM_182577        | FBXO31       |
| 8003243 | -1,64 | -3,12 | 0,01604 | -0,32 | -1,25  | 0,49815 | AK026130 CT47A1  | ---          |
| 8174837 | -1,64 | -3,12 | 0,11190 | -1,49 | -2,80  | 0,06994 | NM_001080146     | CT47A1       |
| 8174841 | -1,64 | -3,12 | 0,11190 | -1,49 | -2,80  | 0,06994 | NM_001080146     | CT47A1       |
| 8174845 | -1,64 | -3,12 | 0,11190 | -1,49 | -2,80  | 0,06994 | NM_001080146     | CT47A1       |
| 8174849 | -1,64 | -3,12 | 0,11190 | -1,49 | -2,80  | 0,06994 | NM_001080146     | CT47A10      |
| 8174862 | -1,64 | -3,12 | 0,11190 | -1,49 | -2,80  | 0,06994 | NM_001080137     | CT47A1       |
| 8174867 | -1,64 | -3,12 | 0,11190 | -1,49 | -2,80  | 0,06994 | NM_001080146     | CT47A1       |
| 8174872 | -1,64 | -3,12 | 0,11190 | -1,49 | -2,80  | 0,06994 | NM_001080146     | CT47A1       |
| 8174876 | -1,64 | -3,12 | 0,11190 | -1,49 | -2,80  | 0,06994 | NM_001080146     | CT47A1       |
| 8174882 | -1,64 | -3,12 | 0,11190 | -1,49 | -2,80  | 0,06994 | NM_001080146     | PIK3R5       |
| 8012558 | -1,64 | -3,12 | 0,00994 | -0,41 | -1,33  | 0,26902 | NM_001142633     | KRT28        |
| 8015095 | -1,64 | -3,12 | 0,04350 | -1,62 | -3,07  | 0,00007 | NM_181535        | VGf          |
| 8141664 | -1,64 | -3,12 | 0,00377 | -1,95 | -3,85  | 0,00052 | NM_003378        | ---          |
| 7976874 | -1,64 | -3,12 | 0,00688 | -2,72 | -6,61  | 0,00001 | --- JRK          | ---          |
| 8153328 | -1,64 | -3,12 | 0,01379 | -1,03 | -2,04  | 0,14784 | NM_003724        | SPDYE1       |
| 8140454 | -1,64 | -3,12 | 0,16974 | -3,09 | -8,53  | 0,00034 | NM_175064        | TIGD3        |
| 7941255 | -1,64 | -3,12 | 0,03532 | -0,96 | -1,94  | 0,02188 | NM_145719        | GSDMA        |
| 8006968 | -1,64 | -3,12 | 0,00342 | -1,84 | -3,58  | 0,01248 | NM_178171        | C17orf96     |
| 8014700 | -1,64 | -3,12 | 0,03700 | -0,51 | -1,42  | 0,11668 | NM_001130677     | KIF2B        |
| 8008544 | -1,64 | -3,12 | 0,00606 | -1,76 | -3,38  | 0,01389 | NM_032559        | ---          |
| 7982152 | -1,64 | -3,13 | 0,05128 | -1,77 | -3,41  | 0,05973 | ---              | ---          |
| 7986661 | -1,64 | -3,13 | 0,05128 | -1,77 | -3,41  | 0,05973 | ---              | ---          |
| 7986943 | -1,64 | -3,13 | 0,05128 | -1,77 | -3,41  | 0,05973 | ---              | SLC25A10     |
| 8010673 | -1,64 | -3,13 | 0,01328 | 1,11  | 2,16   | 0,03464 | NM_012140        | ---          |
| 7902563 | -1,64 | -3,13 | 0,00115 | -1,90 | -3,72  | 0,00282 | ---              | LOC284912    |
| 8075668 | -1,64 | -3,13 | 0,02441 | -2,11 | -4,32  | 0,00618 | ENST00000457711  | TMEM190      |
| 8031475 | -1,64 | -3,13 | 0,01953 | -1,21 | -2,31  | 0,00226 | NM_139172        | S1PR5        |
| 8034043 | -1,65 | -3,13 | 0,03936 | -1,18 | -2,27  | 0,12242 | NM_030760        | ---          |
| 8166872 | -1,65 | -3,13 | 0,00340 | -1,62 | -3,08  | 0,00259 | ---              | LOC441204    |
| 8131965 | -1,65 | -3,13 | 0,05746 | -1,35 | -2,55  | 0,04018 | AK056484 DULLARD | ---          |
| 8012116 | -1,65 | -3,13 | 0,01716 | 1,88  | 3,68   | 0,00892 | NM_015343        | ---          |
| 8002260 | -1,65 | -3,13 | 0,01967 | -1,85 | -3,60  | 0,00479 | ---              | PGR          |
| 7951165 | -1,65 | -3,13 | 0,00203 | -1,17 | -2,25  | 0,01415 | NM_000926        | MRPL41       |
| 8159687 | -1,65 | -3,13 | 0,01851 | 0,47  | 1,38   | 0,41870 | NM_032477        | CACNA1S      |
| 7923271 | -1,65 | -3,13 | 0,00226 | -1,37 | -2,58  | 0,01252 | NM_000069        | ---          |
| 8027381 | -1,65 | -3,13 | 0,01420 | -1,54 | -2,90  | 0,02441 | ---              | HBD          |
| 7946041 | -1,65 | -3,13 | 0,00806 | -1,89 | -3,70  | 0,00129 | NM_000519        | ---          |
| 8101011 | -1,65 | -3,13 | 0,13920 | -1,80 | -3,47  | 0,06625 | ---              | AMN          |
| 7977033 | -1,65 | -3,13 | 0,00422 | -0,84 | -1,79  | 0,07084 | NM_030943        | MIR28        |
| 8084755 | -1,65 | -3,13 | 0,04076 | -2,20 | -4,61  | 0,01369 | NR_029502        | C19orf29     |
| 8024682 | -1,65 | -3,13 | 0,00360 | -1,63 | -3,09  | 0,00004 | NM_021231        | NRAP         |
| 7936360 | -1,65 | -3,14 | 0,00123 | -1,51 | -2,85  | 0,00146 | NM_198060        | MESP1        |
| 7991332 | -1,65 | -3,14 | 0,00182 | -0,89 | -1,85  | 0,06140 | NM_018670        | GGN          |
| 8036494 | -1,65 | -3,14 | 0,02449 | -1,45 | -2,74  | 0,01417 | NM_152657        | SNX20        |
| 8001373 | -1,65 | -3,14 | 0,01090 | -1,29 | -2,44  | 0,05262 | NM_153337        | NGFR         |
| 8008201 | -1,65 | -3,14 | 0,02997 | -1,13 | -2,18  | 0,02190 | NM_002507        | ---          |
| 7970674 | -1,65 | -3,14 | 0,03606 | -2,67 | -6,37  | 0,00162 | ---              | ---          |
| 7983189 | -1,65 | -3,14 | 0,01563 | -2,04 | -4,12  | 0,04494 | ---              | PLCH2        |
| 7897089 | -1,65 | -3,14 | 0,01296 | -1,29 | -2,44  | 0,00570 | NM_014638        | ---          |
| 8169350 | -1,65 | -3,14 | 0,01611 | -3,95 | -15,44 | 0,00001 | ---              | 05. Sep      |
| 8071234 | -1,65 | -3,14 | 0,00319 | -1,12 | -2,18  | 0,02857 | NM_002688        | ---          |
| 8155501 | -1,65 | -3,14 | 0,02784 | -1,32 | -2,50  | 0,02182 | ---              | ---          |
| 7905744 | -1,65 | -3,14 | 0,01271 | -1,54 | -2,92  | 0,00040 | ---              | ---          |
| 7923231 | -1,65 | -3,14 | 0,07654 | -1,22 | -2,34  | 0,00028 | ---              | ---          |
| 7901340 | -1,65 | -3,14 | 0,02797 | -1,30 | -2,45  | 0,01096 | ---              | ---          |
| 7914921 | -1,65 | -3,14 | 0,00426 | -1,89 | -3,71  | 0,01565 | ---              | CLEC4Gp1     |
| 8025321 | -1,65 | -3,14 | 0,03089 | -1,36 | -2,57  | 0,00850 | NR_002931        | ---          |
| 8072924 | -1,65 | -3,14 | 0,01416 | -1,55 | -2,92  | 0,04676 | ---              | ZNF296       |
| 8037495 | -1,65 | -3,15 | 0,02651 | -1,62 | -3,08  | 0,00351 | NM_145288        | CLEC5A       |
| 8143471 | -1,65 | -3,15 | 0,00876 | -1,63 | -3,10  | 0,00058 | NM_013252        | MIR105-2     |
| 8175708 | -1,65 | -3,15 | 0,00397 | -1,08 | -2,12  | 0,01019 | NR_029522        | OR51S1       |
| 7946004 | -1,65 | -3,15 | 0,04730 | -2,29 | -4,88  | 0,01720 | NM_001004758     | ---          |

|         |       |       |         |       |        |         |                 |            |
|---------|-------|-------|---------|-------|--------|---------|-----------------|------------|
| 8131203 | -1,66 | -3,15 | 0,01697 | -2,42 | -5,37  | 0,00094 | ---             | ---        |
| 8029669 | -1,66 | -3,15 | 0,01852 | -1,49 | -2,82  | 0,02398 | ---             | FLJ11292   |
| 8113003 | -1,66 | -3,15 | 0,00088 | -0,72 | -1,65  | 0,34197 | AK002104        | ---        |
| 7996260 | -1,66 | -3,15 | 0,05382 | -2,16 | -4,46  | 0,00304 | ---             | DMRTA2     |
| 7915991 | -1,66 | -3,15 | 0,03621 | -1,16 | -2,24  | 0,08463 | NM_032110       | LOC729862  |
| 8104656 | -1,66 | -3,16 | 0,00992 | -1,00 | -2,00  | 0,00805 | BC121073        | ---        |
| 8019910 | -1,66 | -3,16 | 0,01235 | -1,74 | -3,34  | 0,00374 | ---             | HLA-DQB2   |
| 8180029 | -1,66 | -3,16 | 0,02994 | -1,04 | -2,06  | 0,00653 | NR_003937       | ---        |
| 7905254 | -1,66 | -3,16 | 0,00011 | -0,90 | -1,87  | 0,00031 | ---             | CRHR1      |
| 8007808 | -1,66 | -3,16 | 0,01641 | -1,36 | -2,56  | 0,01682 | NM_001145146    | EVX2       |
| 8056959 | -1,66 | -3,16 | 0,01896 | -2,16 | -4,46  | 0,00013 | NM_001080458    | ---        |
| 8121782 | -1,66 | -3,16 | 0,09999 | -1,45 | -2,72  | 0,06380 | ---             | SOX1       |
| 7970146 | -1,66 | -3,16 | 0,01533 | -1,13 | -2,19  | 0,00477 | NM_005986       | NT5C1A     |
| 7915238 | -1,66 | -3,16 | 0,00027 | -1,07 | -2,10  | 0,00024 | NM_032526       | PRX        |
| 8036890 | -1,66 | -3,16 | 0,01954 | -1,70 | -3,24  | 0,00570 | NM_020956       | SLMO1      |
| 8020226 | -1,66 | -3,16 | 0,02610 | -0,09 | -1,06  | 0,58039 | NM_001142405    | ---        |
| 7916741 | -1,66 | -3,16 | 0,02194 | -1,94 | -3,84  | 0,00205 | ---             | SLCO4A1    |
| 8063923 | -1,66 | -3,16 | 0,04237 | 0,14  | 1,10   | 0,81113 | NM_016354       | LAD1       |
| 7923347 | -1,66 | -3,16 | 0,04196 | 0,19  | 1,14   | 0,68281 | NM_005558       | KRTAP9-2   |
| 8007118 | -1,66 | -3,16 | 0,02979 | -1,07 | -2,10  | 0,03318 | ENST00000318329 | POU5F2     |
| 8113094 | -1,66 | -3,16 | 0,04670 | -1,83 | -3,55  | 0,02104 | NM_153216       | KCNJ10     |
| 7921533 | -1,66 | -3,16 | 0,00366 | -1,59 | -3,02  | 0,02420 | NM_002241       | PRAMEF20   |
| 7898052 | -1,66 | -3,17 | 0,05508 | -1,21 | -2,32  | 0,09327 | NM_001099852    | ---        |
| 8078603 | -1,66 | -3,17 | 0,01899 | -2,52 | -5,72  | 0,00435 | ---             | ---        |
| 7958759 | -1,66 | -3,17 | 0,00192 | -2,03 | -4,09  | 0,00303 | ---             | C19orf30   |
| 8024888 | -1,66 | -3,17 | 0,02547 | -1,12 | -2,18  | 0,00059 | NR_027148       | ---        |
| 7934068 | -1,66 | -3,17 | 0,01219 | -1,24 | -2,36  | 0,03411 | ---             | MAGEA2     |
| 8170562 | -1,66 | -3,17 | 0,01232 | -1,88 | -3,68  | 0,00033 | NM_175742       | CYP26A1    |
| 7929322 | -1,67 | -3,17 | 0,00323 | -0,98 | -1,97  | 0,01017 | NM_000783       | ---        |
| 7944331 | -1,67 | -3,17 | 0,00878 | -1,68 | -3,21  | 0,00149 | ---             | LOC401070  |
| 8088548 | -1,67 | -3,17 | 0,00429 | -2,47 | -5,53  | 0,00578 | AK125779        | WNT10B     |
| 7962918 | -1,67 | -3,17 | 0,01150 | -0,54 | -1,46  | 0,30331 | NM_003394       | ---        |
| 8148329 | -1,67 | -3,17 | 0,00847 | -1,79 | -3,46  | 0,01446 | ---             | ---        |
| 8173607 | -1,67 | -3,17 | 0,00411 | -2,54 | -5,83  | 0,00458 | ---             | AZGP1      |
| 8141374 | -1,67 | -3,17 | 0,00333 | -0,54 | -1,45  | 0,20170 | NM_001185       | VPREB3     |
| 8074934 | -1,67 | -3,17 | 0,01722 | -0,92 | -1,89  | 0,00424 | NM_013378       | S100A8     |
| 7920244 | -1,67 | -3,18 | 0,00858 | -1,16 | -2,24  | 0,00468 | NM_002964       | PRO2268    |
| 7956987 | -1,67 | -3,18 | 0,04048 | -2,07 | -4,20  | 0,18352 | ENST00000456165 | LINGO4     |
| 7920077 | -1,67 | -3,18 | 0,00707 | -2,45 | -5,45  | 0,00191 | NM_001004432    | ZSCAN5C    |
| 8031629 | -1,67 | -3,18 | 0,09050 | -1,40 | -2,64  | 0,13053 | ENST00000376267 | KIR2DS1    |
| 8039896 | -1,67 | -3,18 | 0,03106 | -2,65 | -6,28  | 0,00006 | NM_014512       | ---        |
| 7969048 | -1,67 | -3,18 | 0,06740 | -2,65 | -6,28  | 0,00436 | ---             | DEGS2      |
| 7981278 | -1,67 | -3,18 | 0,02122 | -1,52 | -2,87  | 0,00093 | NM_206918       | ZNF34      |
| 8153896 | -1,67 | -3,18 | 0,00554 | 0,11  | 1,08   | 0,78027 | NM_030580       | NCRNA00086 |
| 8170024 | -1,67 | -3,18 | 0,01448 | -1,37 | -2,58  | 0,01195 | NR_024359       | HIST3H3    |
| 7924884 | -1,67 | -3,18 | 0,02135 | -1,65 | -3,14  | 0,00206 | NM_003493       | IGFBP1     |
| 8132694 | -1,67 | -3,18 | 0,00981 | -1,57 | -2,96  | 0,00513 | NM_000596       | ---        |
| 7931346 | -1,67 | -3,18 | 0,06243 | -1,35 | -2,56  | 0,01187 | ---             | C2orf71    |
| 8051238 | -1,67 | -3,18 | 0,02330 | -1,49 | -2,81  | 0,00010 | NM_001029883    | INCA1      |
| 8011797 | -1,67 | -3,18 | 0,00732 | -2,35 | -5,09  | 0,00008 | NM_001167986    | KLHDC7B    |
| 8074106 | -1,67 | -3,18 | 0,05459 | -1,18 | -2,26  | 0,06177 | NM_138433       | ---        |
| 8043443 | -1,67 | -3,19 | 0,23096 | -3,13 | -8,73  | 0,02302 | ---             | ---        |
| 7933043 | -1,67 | -3,19 | 0,17107 | -1,68 | -3,21  | 0,00984 | ---             | ---        |
| 8162998 | -1,67 | -3,19 | 0,04093 | -3,46 | -11,01 | 0,00205 | ---             | ---        |
| 7996252 | -1,67 | -3,19 | 0,01373 | -1,30 | -2,46  | 0,11545 | ---             | ---        |
| 7943367 | -1,67 | -3,19 | 0,01040 | -2,15 | -4,44  | 0,00748 | ---             | TRIL       |
| 8138799 | -1,67 | -3,19 | 0,01202 | -2,21 | -4,62  | 0,00081 | NM_014817       | SEBOX      |
| 8013602 | -1,67 | -3,19 | 0,01000 | -1,17 | -2,25  | 0,00782 | NM_001080837    | IRAK1      |
| 8175977 | -1,67 | -3,19 | 0,00581 | -0,80 | -1,74  | 0,08216 | NM_001569       | C1orf87    |
| 7916629 | -1,67 | -3,19 | 0,00345 | -1,71 | -3,27  | 0,00344 | BC027878        | CRYBB1     |
| 8075118 | -1,67 | -3,19 | 0,00863 | -1,52 | -2,87  | 0,00135 | NM_001887       | PRDM14     |
| 8151240 | -1,67 | -3,19 | 0,01337 | -1,65 | -3,13  | 0,04638 | NM_024504       | LAGE3      |
| 8176093 | -1,67 | -3,19 | 0,02731 | -1,08 | -2,11  | 0,01608 | NM_006014       | DLX1       |
| 8046373 | -1,67 | -3,19 | 0,00393 | -2,26 | -4,80  | 0,00049 | NM_178120       | SLC6A8     |
| 8170662 | -1,67 | -3,19 | 0,02309 | -1,14 | -2,20  | 0,09977 | NM_005629       | LPAR5      |
| 7960637 | -1,67 | -3,19 | 0,00894 | -2,10 | -4,28  | 0,00861 | NM_020400       | LOC388152  |
| 7991088 | -1,67 | -3,19 | 0,03434 | 0,58  | 1,49   | 0,23976 | NR_027001       | ---        |
| 8021468 | -1,68 | -3,19 | 0,00520 | -3,01 | -8,08  | 0,00015 | ---             | EN2        |
| 8137537 | -1,68 | -3,19 | 0,00885 | -0,90 | -1,86  | 0,05931 | NM_001427       | KIAA1211   |
| 8095216 | -1,68 | -3,19 | 0,01756 | -1,10 | -2,14  | 0,06781 | NM_020722       | OASL       |
| 7967117 | -1,68 | -3,20 | 0,00244 | -1,28 | -2,43  | 0,01147 | NM_003733       | ---        |
| 8043426 | -1,68 | -3,20 | 0,02893 | -2,00 | -3,99  | 0,00035 | ---             | DCST2      |
| 7920616 | -1,68 | -3,20 | 0,01664 | -0,06 | -1,04  | 0,87978 | NM_144622       | EOMES      |

|         |       |       |         |       |        |         |                 |              |
|---------|-------|-------|---------|-------|--------|---------|-----------------|--------------|
| 8085946 | -1,68 | -3,20 | 0,00957 | -0,68 | -1,61  | 0,15005 | NM_005442       | TRIM17       |
| 7924874 | -1,68 | -3,20 | 0,05269 | -1,29 | -2,45  | 0,01160 | NM_016102       | SOX8         |
| 7992125 | -1,68 | -3,20 | 0,04401 | -1,34 | -2,54  | 0,01002 | NM_014587       | HLA-DPB1     |
| 8178220 | -1,68 | -3,20 | 0,03616 | 0,40  | 1,32   | 0,59937 | NM_002121       | POU2F3       |
| 7944537 | -1,68 | -3,20 | 0,01965 | -1,80 | -3,47  | 0,01075 | NM_014352       | PRM3         |
| 7999431 | -1,68 | -3,20 | 0,08142 | -1,70 | -3,24  | 0,00092 | NM_021247       | MAGEA2       |
| 8175732 | -1,68 | -3,20 | 0,01009 | -1,87 | -3,67  | 0,00037 | NM_175742       | ---          |
| 8089928 | -1,68 | -3,20 | 0,00011 | -2,02 | -4,04  | 0,00125 | ---             | RSPH6A       |
| 8037688 | -1,68 | -3,20 | 0,00153 | -1,31 | -2,48  | 0,00284 | NM_030785       | CLIC3        |
| 8165334 | -1,68 | -3,20 | 0,03735 | -1,89 | -3,71  | 0,00355 | NM_004669       | HAPLN4       |
| 8035639 | -1,68 | -3,20 | 0,07261 | -0,83 | -1,78  | 0,02039 | NM_023002       | FAM108A1     |
| 8032371 | -1,68 | -3,21 | 0,11748 | -1,63 | -3,10  | 0,07499 | NM_031213       | LOC729444    |
| 8071361 | -1,68 | -3,21 | 0,06529 | -2,76 | -6,77  | 0,01286 | AK302783        | SLC25A29     |
| 7981283 | -1,68 | -3,21 | 0,01436 | -0,63 | -1,55  | 0,45496 | NM_001039355    | NMB          |
| 7991138 | -1,68 | -3,21 | 0,06037 | -1,21 | -2,32  | 0,00643 | NM_021077       | LOC100132319 |
| 8092702 | -1,68 | -3,21 | 0,01044 | -1,57 | -2,97  | 0,01477 | AF315716        | MIR139       |
| 7950195 | -1,68 | -3,21 | 0,00996 | -0,82 | -1,77  | 0,02517 | NR_029603       | KRTAP2-1     |
| 8015206 | -1,68 | -3,21 | 0,02091 | -3,32 | -10,00 | 0,00060 | NM_001123387    | KRTAP2-1     |
| 8015208 | -1,68 | -3,21 | 0,02091 | -3,28 | -9,70  | 0,00052 | NM_001123387    | REXO1L1      |
| 8151605 | -1,68 | -3,21 | 0,28364 | -5,77 | -54,48 | 0,00005 | AF495523        | REXO1L1      |
| 8151613 | -1,68 | -3,21 | 0,28364 | -5,77 | -54,48 | 0,00005 | AF495523        | REXO1L1      |
| 8151617 | -1,68 | -3,21 | 0,28364 | -5,77 | -54,48 | 0,00005 | AF495523        | REXO1L1      |
| 8151621 | -1,68 | -3,21 | 0,28364 | -5,77 | -54,48 | 0,00005 | AF495523        | REXO1L1      |
| 8151625 | -1,68 | -3,21 | 0,28364 | -5,77 | -54,48 | 0,00005 | AF495523        | ---          |
| 8176931 | -1,68 | -3,21 | 0,00143 | -1,07 | -2,09  | 0,00208 | ---             | ---          |
| 8177403 | -1,68 | -3,21 | 0,00143 | -1,07 | -2,09  | 0,00208 | ---             | ---          |
| 7908328 | -1,68 | -3,21 | 0,05756 | -3,08 | -8,47  | 0,00293 | ---             | LCP2         |
| 8115734 | -1,68 | -3,21 | 0,00586 | -1,54 | -2,92  | 0,00642 | NM_005565       | ---          |
| 7969058 | -1,68 | -3,21 | 0,05248 | -2,19 | -4,57  | 0,00780 | ---             | DKFZp451A211 |
| 7972899 | -1,69 | -3,22 | 0,00386 | -1,39 | -2,62  | 0,01195 | BX647655        | ---          |
| 8168456 | -1,69 | -3,22 | 0,01519 | -1,78 | -3,44  | 0,03341 | ---             | SLC6A13      |
| 7960201 | -1,69 | -3,22 | 0,02346 | -1,62 | -3,06  | 0,01444 | NM_016615       | FGF6         |
| 7960407 | -1,69 | -3,22 | 0,05083 | -0,61 | -1,52  | 0,08235 | NM_020996       | ---          |
| 8047765 | -1,69 | -3,22 | 0,03473 | -1,41 | -2,65  | 0,00233 | ---             | MRAP         |
| 8068192 | -1,69 | -3,22 | 0,00450 | -1,21 | -2,31  | 0,00203 | NM_178817       | ---          |
| 8098289 | -1,69 | -3,22 | 0,07221 | -2,37 | -5,17  | 0,00637 | ---             | FOXA2        |
| 8065344 | -1,69 | -3,22 | 0,02409 | -2,49 | -5,63  | 0,00086 | NM_021784       | SSX8         |
| 8167721 | -1,69 | -3,22 | 0,02232 | -1,57 | -2,98  | 0,02837 | NR_027250       | ---          |
| 7972921 | -1,69 | -3,22 | 0,07022 | -0,58 | -1,49  | 0,15349 | ---             | LTA          |
| 8179258 | -1,69 | -3,22 | 0,03036 | -0,91 | -1,87  | 0,12677 | NM_001159740    | CCDC9        |
| 8029894 | -1,69 | -3,22 | 0,02631 | -1,12 | -2,17  | 0,05929 | NM_015603       | ---          |
| 8043484 | -1,69 | -3,22 | 0,10474 | -2,88 | -7,35  | 0,00001 | ---             | ---          |
| 8014704 | -1,69 | -3,22 | 0,24178 | -0,85 | -1,81  | 0,09511 | ---             | FBXL16       |
| 7992032 | -1,69 | -3,22 | 0,01325 | -1,40 | -2,64  | 0,00641 | NM_153350       | C20orf90     |
| 8067551 | -1,69 | -3,22 | 0,02342 | -1,95 | -3,87  | 0,00852 | ENST00000415185 | STAG3        |
| 8134745 | -1,69 | -3,22 | 0,01296 | -2,11 | -4,33  | 0,00068 | NM_012447       | CDX2         |
| 7970727 | -1,69 | -3,22 | 0,02445 | -1,49 | -2,81  | 0,00016 | NM_001265       | DPEP3        |
| 8002181 | -1,69 | -3,22 | 0,00711 | -2,27 | -4,81  | 0,00180 | NM_022357       | ODZ2         |
| 8109752 | -1,69 | -3,23 | 0,00977 | -0,95 | -1,93  | 0,01158 | AK302302        | NPTXR        |
| 8076169 | -1,69 | -3,23 | 0,04931 | -0,01 | -1,00  | 0,98254 | NM_014293       | HLF          |
| 8008588 | -1,69 | -3,23 | 0,01443 | -1,12 | -2,17  | 0,06448 | NM_002126       | ---          |
| 8113771 | -1,69 | -3,23 | 0,02329 | -2,04 | -4,13  | 0,00633 | ---             | SNAI3        |
| 8003344 | -1,69 | -3,23 | 0,06724 | -0,54 | -1,45  | 0,46070 | NM_178310       | ---          |
| 8067948 | -1,69 | -3,23 | 0,00164 | -1,11 | -2,15  | 0,00864 | ---             | ---          |
| 7933071 | -1,69 | -3,23 | 0,06010 | -1,71 | -3,27  | 0,04030 | ---             | RHBDL1       |
| 7992010 | -1,69 | -3,23 | 0,00877 | -0,83 | -1,77  | 0,10809 | NM_003961       | ---          |
| 8099393 | -1,69 | -3,23 | 0,04103 | -2,45 | -5,45  | 0,05365 | ---             | ANKRD60      |
| 8067242 | -1,69 | -3,23 | 0,06012 | -1,95 | -3,86  | 0,00190 | ENST00000457363 | SPDYE5       |
| 8133654 | -1,69 | -3,23 | 0,24515 | -2,97 | -7,85  | 0,00063 | NM_001099435    | DEFT1P       |
| 8149122 | -1,69 | -3,23 | 0,02991 | -2,99 | -7,97  | 0,00036 | AF355799        | DEFT1P       |
| 8149132 | -1,69 | -3,23 | 0,02991 | -2,99 | -7,97  | 0,00036 | AF355799        | CDC42EP5     |
| 8039273 | -1,69 | -3,23 | 0,00033 | -1,91 | -3,77  | 0,01697 | NM_145057       | GABRA5       |
| 7982102 | -1,69 | -3,23 | 0,01201 | -1,01 | -2,01  | 0,04490 | NM_000810       | LOC440518    |
| 8027343 | -1,69 | -3,23 | 0,04613 | -1,08 | -2,12  | 0,03609 | AK302042        | TAS2R3       |
| 8136641 | -1,69 | -3,24 | 0,02364 | -1,05 | -2,08  | 0,06326 | NM_016943       | LOC100133142 |
| 8031514 | -1,69 | -3,24 | 0,02980 | -0,84 | -1,80  | 0,12515 | XM_001718400    | OR4A47       |
| 7948101 | -1,70 | -3,24 | 0,00345 | -1,21 | -2,32  | 0,00280 | NM_001005512    | ---          |
| 8045846 | -1,70 | -3,24 | 0,03855 | -1,41 | -2,65  | 0,01819 | ---             | SNORD113-3   |
| 7976810 | -1,70 | -3,24 | 0,00254 | -1,31 | -2,48  | 0,02033 | NR_003231       | GCNT3        |
| 7984001 | -1,70 | -3,24 | 0,02306 | 0,95  | 1,93   | 0,23824 | NM_004751       | TACR2        |
| 7934074 | -1,70 | -3,24 | 0,01300 | -1,03 | -2,04  | 0,03991 | NM_001057       | AIRE         |
| 8069037 | -1,70 | -3,24 | 0,04112 | -1,59 | -3,01  | 0,00016 | NM_000383       | PRSS33       |
| 7998861 | -1,70 | -3,24 | 0,08671 | -1,98 | -3,94  | 0,00596 | NM_152891       | ---          |



|         |       |       |         |       |        |         |                 |           |  |
|---------|-------|-------|---------|-------|--------|---------|-----------------|-----------|--|
| 8161563 | -1,70 | -3,24 | 0,13402 | -2,67 | -6,36  | 0,00010 | ---             | ---       |  |
| 8172026 | -1,70 | -3,24 | 0,08770 | -0,91 | -1,88  | 0,14968 | ---             | SNORA52   |  |
| 7937483 | -1,70 | -3,24 | 0,04355 | -0,94 | -1,92  | 0,18643 | NR_002585       | PARVG     |  |
| 8073682 | -1,70 | -3,24 | 0,00266 | -1,51 | -2,85  | 0,00149 | NM_022141       | ---       |  |
| 8098554 | -1,70 | -3,24 | 0,00084 | -1,50 | -2,83  | 0,00001 | ---             | LRRN4     |  |
| 8064894 | -1,70 | -3,24 | 0,00595 | -1,06 | -2,09  | 0,03404 | NM_152611       | RPS10P5   |  |
| 8064394 | -1,70 | -3,25 | 0,04254 | -3,05 | -8,29  | 0,00007 | ENST00000217256 | CD33      |  |
| 8030804 | -1,70 | -3,25 | 0,00533 | -2,57 | -5,93  | 0,00193 | NM_001772       | PPP1R14A  |  |
| 8036473 | -1,70 | -3,25 | 0,01103 | -0,16 | -1,12  | 0,64463 | NM_033256       | ZBTB9     |  |
| 8118721 | -1,70 | -3,25 | 0,00005 | -0,29 | -1,22  | 0,42785 | NM_152735       | ---       |  |
| 7926366 | -1,70 | -3,25 | 0,02498 | -1,18 | -2,27  | 0,06984 | ---             | ---       |  |
| 8089677 | -1,70 | -3,25 | 0,12029 | -2,16 | -4,47  | 0,21163 | ---             | PRTN3     |  |
| 8024048 | -1,70 | -3,25 | 0,04983 | -1,18 | -2,26  | 0,00439 | NM_002777       | ---       |  |
| 8167784 | -1,70 | -3,25 | 0,00071 | -1,48 | -2,80  | 0,01577 | ---             | OR2T8     |  |
| 7911233 | -1,70 | -3,25 | 0,02623 | -1,17 | -2,25  | 0,08787 | NM_001005522    | TP53TG3   |  |
| 7995275 | -1,70 | -3,25 | 0,04799 | -3,08 | -8,46  | 0,00456 | NM_016212       | KIAA2013  |  |
| 7999596 | -1,70 | -3,25 | 0,01204 | -0,58 | -1,49  | 0,53144 | NM_138346       | C9orf171  |  |
| 8158902 | -1,70 | -3,25 | 0,00697 | -1,92 | -3,78  | 0,02338 | BC118593        | ---       |  |
| 8092957 | -1,70 | -3,25 | 0,03029 | -2,43 | -5,41  | 0,00178 | ---             | POU4F3    |  |
| 8108949 | -1,70 | -3,25 | 0,01629 | -1,85 | -3,60  | 0,00128 | NM_002700       | MAPK8IP1  |  |
| 8007848 | -1,70 | -3,25 | 0,03174 | -1,57 | -2,97  | 0,01127 | NM_005456       | NXP2      |  |
| 8055478 | -1,70 | -3,25 | 0,00680 | -2,03 | -4,10  | 0,04425 | NM_007226       | ---       |  |
| 7981320 | -1,70 | -3,25 | 0,03877 | -1,98 | -3,95  | 0,00102 | ---             | PLAC9     |  |
| 7928679 | -1,70 | -3,26 | 0,01081 | -1,43 | -2,70  | 0,07280 | NM_001012973    | TBX10     |  |
| 7949863 | -1,70 | -3,26 | 0,03603 | -1,30 | -2,46  | 0,01654 | NM_005995       | LOC90925  |  |
| 7981742 | -1,70 | -3,26 | 0,00570 | -1,84 | -3,58  | 0,01513 | ENST00000390638 | GRIP2     |  |
| 8085504 | -1,70 | -3,26 | 0,06222 | -1,60 | -3,03  | 0,01452 | NM_001080423    | KRT37     |  |
| 8015280 | -1,70 | -3,26 | 0,00203 | -1,83 | -3,55  | 0,00672 | NM_003770       | GCAT      |  |
| 8072931 | -1,70 | -3,26 | 0,00881 | -0,96 | -1,95  | 0,08333 | NM_001171690    | ---       |  |
| 8080983 | -1,70 | -3,26 | 0,02328 | -1,71 | -3,27  | 0,00443 | ---             | SP7       |  |
| 7963664 | -1,70 | -3,26 | 0,01501 | -1,45 | -2,72  | 0,00500 | NM_001173467    | ---       |  |
| 8088889 | -1,71 | -3,26 | 0,06251 | -2,16 | -4,46  | 0,02172 | ---             | SOX21     |  |
| 7972291 | -1,71 | -3,26 | 0,01776 | -0,99 | -1,99  | 0,00847 | NM_007084       | NAA11     |  |
| 8101253 | -1,71 | -3,26 | 0,04697 | -2,04 | -4,12  | 0,00065 | NM_032693       | ZNF587    |  |
| 8031837 | -1,71 | -3,26 | 0,05962 | -1,48 | -2,78  | 0,07524 | AF294842        | ---       |  |
| 8124922 | -1,71 | -3,26 | 0,00612 | -1,69 | -3,22  | 0,02077 | ---             | C21orf125 |  |
| 8068894 | -1,71 | -3,26 | 0,03778 | -0,77 | -1,70  | 0,08930 | NR_026960       | SOX10     |  |
| 8075992 | -1,71 | -3,26 | 0,05230 | -1,72 | -3,30  | 0,00792 | NM_006941       | SNORA9    |  |
| 8139456 | -1,71 | -3,26 | 0,02844 | -1,30 | -2,46  | 0,07695 | NR_002952       | ---       |  |
| 7971864 | -1,71 | -3,26 | 0,00422 | -1,54 | -2,90  | 0,07288 | ---             | ADAD2     |  |
| 7997569 | -1,71 | -3,26 | 0,03714 | -1,81 | -3,51  | 0,02693 | NM_139174       | MIRLET7G  |  |
| 8087881 | -1,71 | -3,27 | 0,01864 | -3,96 | -15,57 | 0,00348 | NR_029660       | C4orf44   |  |
| 8093756 | -1,71 | -3,27 | 0,00603 | -0,67 | -1,59  | 0,04667 | NM_001042690    | ---       |  |
| 8121064 | -1,71 | -3,27 | 0,00188 | -2,19 | -4,56  | 0,00001 | ---             | TULP1     |  |
| 8125903 | -1,71 | -3,27 | 0,01897 | -2,05 | -4,15  | 0,00052 | NM_003322       | SH2D6     |  |
| 8043157 | -1,71 | -3,27 | 0,00032 | -1,70 | -3,25  | 0,00437 | NM_198482       | ---       |  |
| 8022504 | -1,71 | -3,27 | 0,00071 | -1,50 | -2,83  | 0,01343 | ---             | DNHD1     |  |
| 7938118 | -1,71 | -3,27 | 0,00167 | -0,02 | -1,02  | 0,90165 | NM_173589       | ---       |  |
| 7977734 | -1,71 | -3,27 | 0,01595 | -0,75 | -1,69  | 0,27672 | ---             | ---       |  |
| 8115300 | -1,71 | -3,27 | 0,01024 | -1,67 | -3,18  | 0,00010 | ---             | ---       |  |
| 8043456 | -1,71 | -3,27 | 0,00198 | -1,27 | -2,41  | 0,00549 | ---             | RAI2      |  |
| 8171539 | -1,71 | -3,27 | 0,00100 | -1,80 | -3,47  | 0,00033 | NM_001172743    | POM121L8P |  |
| 8071168 | -1,71 | -3,28 | 0,07942 | -2,73 | -6,64  | 0,00095 | NR_024583       | ADAMTS17  |  |
| 7991516 | -1,71 | -3,28 | 0,00328 | -1,00 | -2,00  | 0,03443 | NM_139057       | ---       |  |
| 7972743 | -1,71 | -3,28 | 0,00930 | -1,80 | -3,47  | 0,00015 | ---             | ---       |  |
| 8122703 | -1,71 | -3,28 | 0,28590 | -3,03 | -8,19  | 0,00135 | ---             | OR4E2     |  |
| 7973296 | -1,71 | -3,28 | 0,11414 | -1,00 | -2,01  | 0,03978 | NM_001001912    | ---       |  |
| 7953763 | -1,71 | -3,28 | 0,05345 | -2,72 | -6,58  | 0,00127 | ---             | OR10G6    |  |
| 7952386 | -1,71 | -3,28 | 0,00599 | -1,86 | -3,64  | 0,03987 | ENST00000307002 | GLDC      |  |
| 8160024 | -1,71 | -3,28 | 0,08294 | -1,15 | -2,22  | 0,04640 | NM_000170       | WFDC2     |  |
| 8063000 | -1,71 | -3,28 | 0,01147 | 0,80  | 1,74   | 0,05359 | NM_006103       | MIR210    |  |
| 7945460 | -1,71 | -3,28 | 0,04925 | -2,05 | -4,15  | 0,00185 | NR_029623       | MIR302B   |  |
| 8102406 | -1,72 | -3,29 | 0,01469 | -0,58 | -1,49  | 0,00008 | NR_029857       | MIRLET7I  |  |
| 7956737 | -1,72 | -3,29 | 0,01488 | -2,15 | -4,43  | 0,00666 | NR_029661       | ---       |  |
| 8112435 | -1,72 | -3,29 | 0,09250 | -3,29 | -9,78  | 0,00008 | ---             | KLK10     |  |
| 8038725 | -1,72 | -3,29 | 0,00568 | -1,13 | -2,19  | 0,00498 | NM_002776       | CAV3      |  |
| 8077503 | -1,72 | -3,29 | 0,00286 | -1,66 | -3,17  | 0,00136 | NM_033337       | CTAG2     |  |
| 8176159 | -1,72 | -3,29 | 0,02102 | -2,23 | -4,70  | 0,02123 | NM_020994       | ---       |  |
| 8054943 | -1,72 | -3,29 | 0,03716 | -1,81 | -3,52  | 0,00040 | ---             | UCN2      |  |
| 8086981 | -1,72 | -3,29 | 0,04806 | -3,53 | -11,55 | 0,00071 | NM_033199       | ---       |  |
| 7904209 | -1,72 | -3,29 | 0,04914 | -2,77 | -6,81  | 0,00029 | ---             | ---       |  |
| 8122263 | -1,72 | -3,29 | 0,02479 | -1,47 | -2,76  | 0,00057 | ---             | UHRF1     |  |
| 8024900 | -1,72 | -3,29 | 0,01101 | 1,81  | 3,51   | 0,07589 | NM_001048201    | SSTR3     |  |

|         |       |       |         |       |        |         |                 |           |
|---------|-------|-------|---------|-------|--------|---------|-----------------|-----------|
| 8075906 | -1,72 | -3,29 | 0,02045 | -1,85 | -3,62  | 0,00004 | NM_001051       | ---       |
| 8123891 | -1,72 | -3,29 | 0,00773 | -2,05 | -4,13  | 0,01348 | ---             | ITGA2B    |
| 8016044 | -1,72 | -3,29 | 0,01790 | -0,60 | -1,51  | 0,10576 | NM_000419       | ---       |
| 7927060 | -1,72 | -3,30 | 0,01534 | -1,61 | -3,05  | 0,00006 | ---             | FMN1      |
| 7987163 | -1,72 | -3,30 | 0,24227 | -1,01 | -2,01  | 0,12492 | ENST00000414268 | C12orf67  |
| 7961820 | -1,72 | -3,30 | 0,02675 | -2,80 | -6,98  | 0,00001 | ENST00000358374 | ---       |
| 8124038 | -1,72 | -3,30 | 0,00398 | -2,54 | -5,82  | 0,00801 | ---             | KBTBD11   |
| 8144317 | -1,72 | -3,30 | 0,00234 | -1,31 | -2,49  | 0,01166 | NM_014867       | LOC388152 |
| 7991159 | -1,72 | -3,30 | 0,02620 | 0,71  | 1,63   | 0,14198 | NR_027001       | ---       |
| 7927153 | -1,72 | -3,30 | 0,02555 | -2,71 | -6,55  | 0,00013 | ---             | FAM181A   |
| 7976407 | -1,72 | -3,30 | 0,01456 | -0,99 | -1,99  | 0,02115 | BC009073        | CROCCL1   |
| 7912839 | -1,72 | -3,30 | 0,00278 | -1,26 | -2,40  | 0,05988 | NR_026752       | TMEM81    |
| 7940377 | -1,72 | -3,31 | 0,00716 | -0,38 | -1,30  | 0,48955 | NM_017870       | KRTAP8-1  |
| 8069863 | -1,73 | -3,31 | 0,00451 | -1,87 | -3,66  | 0,00236 | NM_175857       | MYL6B     |
| 7956200 | -1,73 | -3,31 | 0,00155 | -0,37 | -1,29  | 0,38232 | NM_002475       | RASL10B   |
| 8006562 | -1,73 | -3,31 | 0,00439 | -1,98 | -3,93  | 0,00313 | NM_033315       | BOD1P     |
| 8021344 | -1,73 | -3,31 | 0,00423 | -1,73 | -3,31  | 0,00341 | NR_033372       | ---       |
| 8151929 | -1,73 | -3,31 | 0,01536 | -1,21 | -2,31  | 0,25017 | ---             | FGF4      |
| 7950032 | -1,73 | -3,31 | 0,04618 | -1,34 | -2,53  | 0,00164 | NM_002007       | HR        |
| 8149652 | -1,73 | -3,31 | 0,00393 | -1,85 | -3,60  | 0,00300 | NM_005144       | SPANXA2   |
| 8170249 | -1,73 | -3,31 | 0,01821 | -1,97 | -3,92  | 0,00532 | NM_145662       | SPANXA2   |
| 8175550 | -1,73 | -3,31 | 0,01821 | -1,97 | -3,92  | 0,00532 | NM_145662       | C1orf64   |
| 7898296 | -1,73 | -3,31 | 0,04092 | -1,01 | -2,02  | 0,00508 | NM_178840       | ---       |
| 8110604 | -1,73 | -3,31 | 0,00375 | -1,64 | -3,13  | 0,06638 | ---             | ---       |
| 8175330 | -1,73 | -3,31 | 0,00133 | -0,90 | -1,87  | 0,02705 | ---             | SBK2      |
| 8039520 | -1,73 | -3,31 | 0,02137 | -0,57 | -1,48  | 0,18588 | NM_001101401    | ---       |
| 8113639 | -1,73 | -3,31 | 0,00051 | -1,66 | -3,16  | 0,00001 | ---             | LOC389458 |
| 8131296 | -1,73 | -3,31 | 0,00446 | -1,49 | -2,81  | 0,00018 | NR_015343       | ---       |
| 7967898 | -1,73 | -3,31 | 0,00891 | -1,68 | -3,20  | 0,00737 | ---             | ---       |
| 8098412 | -1,73 | -3,32 | 0,02645 | -2,31 | -4,97  | 0,01203 | ---             | CYP2C18   |
| 7929466 | -1,73 | -3,32 | 0,00284 | -1,24 | -2,36  | 0,00456 | NM_000772       | CHTF18    |
| 7992092 | -1,73 | -3,32 | 0,03023 | -0,80 | -1,74  | 0,01927 | NM_022092       | NFE4      |
| 8135224 | -1,73 | -3,32 | 0,02998 | -2,17 | -4,49  | 0,00944 | NM_001085386    | KCNF1     |
| 8040265 | -1,73 | -3,32 | 0,01500 | -2,04 | -4,12  | 0,00662 | NM_002236       | TMEM151A  |
| 7941594 | -1,73 | -3,32 | 0,01261 | -2,69 | -6,45  | 0,00013 | NM_153266       | ---       |
| 7991828 | -1,73 | -3,32 | 0,02524 | -2,05 | -4,13  | 0,00060 | ---             | TREML1    |
| 8126269 | -1,73 | -3,32 | 0,02145 | -1,05 | -2,08  | 0,01904 | NM_178174       | ---       |
| 8046060 | -1,73 | -3,32 | 0,00566 | -1,93 | -3,81  | 0,00195 | ---             | SLITRK3   |
| 8091863 | -1,73 | -3,32 | 0,01300 | -1,34 | -2,53  | 0,00031 | NM_014926       | SLC25A34  |
| 7898249 | -1,73 | -3,32 | 0,00817 | -1,63 | -3,09  | 0,02090 | NM_207348       | ---       |
| 7955419 | -1,73 | -3,32 | 0,00298 | -1,54 | -2,91  | 0,00850 | ---             | TBX1      |
| 8071276 | -1,73 | -3,32 | 0,01439 | -1,73 | -3,33  | 0,00284 | NM_080647       | C6orf25   |
| 8118249 | -1,73 | -3,32 | 0,00607 | -2,55 | -5,87  | 0,00604 | NM_138277       | OR52K3P   |
| 7937940 | -1,73 | -3,33 | 0,03312 | -3,30 | -9,86  | 0,02524 | AF143328        | KRTAP19-3 |
| 8069831 | -1,73 | -3,33 | 0,05216 | -2,50 | -5,66  | 0,00057 | NM_181609       | LEP       |
| 8135909 | -1,73 | -3,33 | 0,00344 | -1,21 | -2,31  | 0,01714 | NM_000230       | ---       |
| 8117710 | -1,73 | -3,33 | 0,06997 | -2,46 | -5,50  | 0,00924 | ---             | ---       |
| 8129309 | -1,74 | -3,33 | 0,06273 | -1,49 | -2,81  | 0,18960 | ---             | ---       |
| 8012854 | -1,74 | -3,33 | 0,01524 | -1,28 | -2,43  | 0,00110 | ---             | RASSF10   |
| 7938559 | -1,74 | -3,33 | 0,00034 | -1,53 | -2,88  | 0,02656 | NM_001080521    | LOC375196 |
| 8051668 | -1,74 | -3,33 | 0,00359 | -1,89 | -3,71  | 0,00169 | NR_028386       | ---       |
| 8100360 | -1,74 | -3,33 | 0,02546 | -2,13 | -4,38  | 0,02825 | ---             | ---       |
| 8023216 | -1,74 | -3,33 | 0,03943 | -1,94 | -3,83  | 0,00762 | ---             | ---       |
| 8103041 | -1,74 | -3,33 | 0,00238 | -1,73 | -3,31  | 0,00754 | ---             | WNT11     |
| 7950534 | -1,74 | -3,33 | 0,02802 | -0,77 | -1,70  | 0,05401 | NM_004626       | ZCCHC16   |
| 8169432 | -1,74 | -3,34 | 0,01484 | -1,88 | -3,67  | 0,00003 | NM_001004308    | C20orf134 |
| 8061944 | -1,74 | -3,34 | 0,00019 | -1,08 | -2,11  | 0,03747 | NM_001024675    | SPDYE1    |
| 8140424 | -1,74 | -3,34 | 0,18724 | -3,17 | -8,99  | 0,00039 | NM_175064       | HAGHL     |
| 7992049 | -1,74 | -3,34 | 0,02380 | -2,00 | -4,01  | 0,01814 | NM_207112       | ---       |
| 8155537 | -1,74 | -3,34 | 0,01303 | -1,27 | -2,41  | 0,02671 | ---             | CACNG5    |
| 8009326 | -1,74 | -3,34 | 0,02798 | -1,71 | -3,28  | 0,00028 | NM_145811       | OR1D2     |
| 8011322 | -1,74 | -3,34 | 0,05629 | -1,66 | -3,17  | 0,00503 | NM_002548       | ---       |
| 7940020 | -1,74 | -3,34 | 0,00244 | -1,78 | -3,43  | 0,00329 | ---             | C20orf123 |
| 8066754 | -1,74 | -3,34 | 0,00188 | -1,81 | -3,52  | 0,00294 | NM_080721       | CACNG8    |
| 8031084 | -1,74 | -3,34 | 0,00204 | -2,24 | -4,71  | 0,00031 | NM_031895       | TUBB2C    |
| 8165496 | -1,74 | -3,34 | 0,20586 | -4,08 | -16,87 | 0,00242 | NM_006088       | ---       |
| 8101673 | -1,74 | -3,34 | 0,27783 | -0,91 | -1,88  | 0,06660 | ---             | FLJ40292  |
| 8159732 | -1,74 | -3,34 | 0,02854 | -2,17 | -4,51  | 0,00196 | NR_024341       | MAP4K1    |
| 8036525 | -1,74 | -3,34 | 0,00300 | -0,53 | -1,45  | 0,18343 | NM_001042600    | ---       |
| 8038343 | -1,74 | -3,34 | 0,01769 | -0,13 | -1,09  | 0,73098 | ---             | C1orf190  |
| 7901187 | -1,74 | -3,35 | 0,00064 | -1,67 | -3,18  | 0,02890 | NM_001013615    | ---       |
| 8166349 | -1,74 | -3,35 | 0,00163 | -0,90 | -1,86  | 0,02150 | ---             | LOC441956 |
| 8069503 | -1,74 | -3,35 | 0,06901 | -2,16 | -4,47  | 0,03979 | AK125677        | HEYL      |

|         |       |       |         |       |        |         |                 |                |
|---------|-------|-------|---------|-------|--------|---------|-----------------|----------------|
| 7915229 | -1,74 | -3,35 | 0,02569 | 0,45  | 1,37   | 0,02718 | NM_014571       | SDC1           |
| 8050557 | -1,74 | -3,35 | 0,00484 | -0,34 | -1,26  | 0,46209 | NM_001006946    | ---            |
| 8120600 | -1,74 | -3,35 | 0,08685 | -1,84 | -3,59  | 0,01042 | ---             | ---            |
| 7948054 | -1,74 | -3,35 | 0,17559 | -2,35 | -5,10  | 0,01503 | ---             | LGALS7         |
| 8028546 | -1,74 | -3,35 | 0,00234 | -1,26 | -2,39  | 0,00211 | NM_002307       | EFCAB4A        |
| 7937498 | -1,74 | -3,35 | 0,05004 | -1,17 | -2,26  | 0,05923 | NM_173584       | RXFP3          |
| 8104781 | -1,74 | -3,35 | 0,00275 | -1,05 | -2,07  | 0,01572 | NM_016568       | DRD4           |
| 7937433 | -1,75 | -3,35 | 0,00149 | -2,48 | -5,57  | 0,00029 | NM_000797       | SLC2A8         |
| 8158009 | -1,75 | -3,35 | 0,01500 | -0,98 | -1,97  | 0,11580 | NM_014580       | RTBDN          |
| 8034555 | -1,75 | -3,35 | 0,06283 | -1,98 | -3,94  | 0,02998 | NM_031429       | ---            |
| 8102785 | -1,75 | -3,35 | 0,04045 | -1,52 | -2,87  | 0,00640 | ---             | GFRA4          |
| 8064676 | -1,75 | -3,36 | 0,04085 | -2,86 | -7,25  | 0,00047 | NM_145762       | ---            |
| 7902848 | -1,75 | -3,36 | 0,00959 | -1,61 | -3,06  | 0,00409 | ---             | ---            |
| 7944763 | -1,75 | -3,36 | 0,08126 | -1,15 | -2,22  | 0,00081 | ---             | CELF5          |
| 8024605 | -1,75 | -3,36 | 0,00787 | -1,08 | -2,12  | 0,00376 | NM_021938       | RNU4-1         |
| 7967030 | -1,75 | -3,36 | 0,24102 | -2,54 | -5,81  | 0,06932 | NR_003925       | DRD5           |
| 8053728 | -1,75 | -3,36 | 0,08053 | -3,28 | -9,71  | 0,00234 | NM_000798       | ---            |
| 7946659 | -1,75 | -3,36 | 0,01418 | -2,44 | -5,44  | 0,00032 | ---             | CEACAM4        |
| 8037045 | -1,75 | -3,37 | 0,00969 | -2,56 | -5,89  | 0,00057 | NM_001817       | MIXL1          |
| 7910134 | -1,75 | -3,37 | 0,02461 | -1,93 | -3,81  | 0,00052 | NM_031944       | GALNT14        |
| 8051298 | -1,75 | -3,37 | 0,02908 | 0,96  | 1,94   | 0,07613 | NM_024572       | C20orf201      |
| 8067812 | -1,75 | -3,37 | 0,02167 | -2,05 | -4,14  | 0,01770 | BC036837        | ---            |
| 8097013 | -1,75 | -3,37 | 0,00546 | -2,43 | -5,39  | 0,00472 | ---             | LGALS9B        |
| 8013450 | -1,75 | -3,37 | 0,01904 | -1,81 | -3,51  | 0,00881 | NM_001042685    | OR4C46         |
| 7939910 | -1,75 | -3,37 | 0,12713 | -2,45 | -5,46  | 0,00213 | NM_001004703    | PKP3           |
| 7937363 | -1,75 | -3,37 | 0,00243 | 0,47  | 1,38   | 0,41060 | NM_007183       | C15orf52       |
| 7987511 | -1,75 | -3,37 | 0,01300 | -1,23 | -2,35  | 0,01144 | NM_207380       | VSTM2B         |
| 8027385 | -1,75 | -3,37 | 0,03883 | -2,03 | -4,09  | 0,00185 | NM_001146339    | ---            |
| 8154866 | -1,75 | -3,37 | 0,03552 | -1,45 | -2,73  | 0,01203 | ---             | CNR2           |
| 7913705 | -1,75 | -3,38 | 0,00918 | -1,88 | -3,67  | 0,00604 | NM_001841       | DKFZP686115217 |
| 8116607 | -1,76 | -3,38 | 0,00512 | -0,77 | -1,70  | 0,01516 | NR_026855       | SH3TC1         |
| 8094032 | -1,76 | -3,38 | 0,01599 | -0,44 | -1,36  | 0,45153 | NM_018986       | HES2           |
| 7912031 | -1,76 | -3,38 | 0,00221 | -1,32 | -2,50  | 0,03822 | NM_019089       | LOC284009      |
| 8011270 | -1,76 | -3,38 | 0,04001 | -1,72 | -3,30  | 0,01516 | ENST00000381977 | LTB            |
| 8124950 | -1,76 | -3,38 | 0,00459 | -1,98 | -3,94  | 0,00149 | NM_002341       | LTB            |
| 8178512 | -1,76 | -3,38 | 0,00459 | -1,98 | -3,94  | 0,00149 | NM_002341       | LTB            |
| 8179768 | -1,76 | -3,38 | 0,00459 | -1,98 | -3,94  | 0,00149 | NM_002341       | FAM195A        |
| 7991932 | -1,76 | -3,38 | 0,07673 | -0,76 | -1,69  | 0,04591 | BC001912        | GIMAP4         |
| 8137244 | -1,76 | -3,38 | 0,01059 | -1,21 | -2,32  | 0,00012 | NM_018326       | B3GNTL1        |
| 8019545 | -1,76 | -3,38 | 0,00371 | 0,31  | 1,24   | 0,35186 | NM_001009905    | MIR1974        |
| 8113120 | -1,76 | -3,38 | 0,03114 | -3,39 | -10,46 | 0,01021 | NR_031738       | MIR1974        |
| 8165707 | -1,76 | -3,38 | 0,03114 | -3,39 | -10,46 | 0,01021 | NR_031738       | ---            |
| 8017098 | -1,76 | -3,38 | 0,00181 | -1,49 | -2,81  | 0,00344 | ---             | TMEM90B        |
| 8061406 | -1,76 | -3,38 | 0,00475 | -1,35 | -2,55  | 0,04715 | NM_024893       | C3orf27        |
| 8090485 | -1,76 | -3,38 | 0,01094 | -1,41 | -2,65  | 0,00021 | NM_007354       | PLVAP          |
| 8035297 | -1,76 | -3,39 | 0,02830 | -2,38 | -5,20  | 0,00022 | NM_031310       | HOPX           |
| 8100507 | -1,76 | -3,39 | 0,00624 | -1,96 | -3,88  | 0,00029 | NM_001145460    | DGCR5          |
| 8071185 | -1,76 | -3,39 | 0,02452 | -0,87 | -1,83  | 0,02957 | NR_002733       | CXorf61        |
| 8174648 | -1,76 | -3,39 | 0,00242 | 1,76  | 3,38   | 0,00911 | NM_001017978    | KRTCAP3        |
| 8040949 | -1,76 | -3,39 | 0,00913 | 2,15  | 4,44   | 0,00074 | NM_173853       | FLJ38379       |
| 8049957 | -1,76 | -3,39 | 0,03874 | -1,16 | -2,24  | 0,05622 | AK095698        | MEOX1          |
| 8015821 | -1,76 | -3,39 | 0,04623 | -2,55 | -5,86  | 0,00044 | NM_004527       | ---            |
| 8177044 | -1,76 | -3,39 | 0,01087 | -1,73 | -3,32  | 0,01113 | ---             | ---            |
| 7973966 | -1,76 | -3,39 | 0,02539 | -2,99 | -7,96  | 0,00429 | ---             | CCDC85B        |
| 7941457 | -1,76 | -3,39 | 0,03536 | -1,27 | -2,42  | 0,04722 | NM_006848       | ---            |
| 8126358 | -1,76 | -3,39 | 0,00127 | -1,55 | -2,92  | 0,00431 | ---             | OR7D4          |
| 8033740 | -1,76 | -3,39 | 0,00555 | -2,04 | -4,10  | 0,01135 | NM_001005191    | ---            |
| 8092065 | -1,76 | -3,39 | 0,04451 | -2,14 | -4,41  | 0,00038 | ---             | ---            |
| 8046588 | -1,76 | -3,39 | 0,01241 | -0,96 | -1,95  | 0,00611 | ---             | MGC23270       |
| 7977296 | -1,76 | -3,39 | 0,01001 | -0,98 | -1,97  | 0,08135 | NR_024396       | HEY2           |
| 8121850 | -1,76 | -3,39 | 0,00000 | -0,84 | -1,79  | 0,02188 | NM_012259       | ---            |
| 8157231 | -1,76 | -3,39 | 0,09802 | -2,23 | -4,69  | 0,05800 | ---             | FLJ46363       |
| 7961097 | -1,76 | -3,39 | 0,04031 | -2,42 | -5,36  | 0,00234 | AK128230        | C14orf180      |
| 7977234 | -1,76 | -3,39 | 0,00989 | -1,56 | -2,95  | 0,00606 | NM_001008404    | POU5F1B        |
| 8148315 | -1,76 | -3,39 | 0,01730 | -2,21 | -4,62  | 0,00968 | NM_001159542    | RGMA           |
| 7991459 | -1,76 | -3,40 | 0,02298 | -1,06 | -2,09  | 0,16237 | NM_020211       | ---            |
| 7933929 | -1,77 | -3,40 | 0,11979 | -1,08 | -2,12  | 0,01443 | ---             | ---            |
| 7926898 | -1,77 | -3,40 | 0,00241 | -1,64 | -3,13  | 0,02626 | ---             | ---            |
| 7919564 | -1,77 | -3,40 | 0,03980 | -2,62 | -6,16  | 0,00222 | ---             | ---            |
| 8092724 | -1,77 | -3,40 | 0,02836 | -1,35 | -2,55  | 0,00190 | ---             | FUT5           |
| 8033064 | -1,77 | -3,40 | 0,01444 | -0,19 | -1,14  | 0,60618 | NM_002034       | LYL1           |
| 8034608 | -1,77 | -3,41 | 0,01136 | -1,06 | -2,08  | 0,06607 | NM_005583       | RDM1           |
| 8014326 | -1,77 | -3,41 | 0,00260 | -1,35 | -2,55  | 0,02816 | NR_027997       | CCDC64B        |

|         |       |       |         |       |        |         |                 |            |
|---------|-------|-------|---------|-------|--------|---------|-----------------|------------|
| 7998910 | -1,77 | -3,41 | 0,05000 | -1,66 | -3,16  | 0,00054 | NM_001103175    | C7orf51    |
| 8134827 | -1,77 | -3,41 | 0,01004 | -2,19 | -4,56  | 0,00301 | ENST00000300179 | TNFSF14    |
| 8033248 | -1,77 | -3,41 | 0,01284 | -1,38 | -2,60  | 0,00051 | NM_003807       | ---        |
| 8016257 | -1,77 | -3,41 | 0,00591 | -1,26 | -2,40  | 0,00027 | ---             | ---        |
| 7997502 | -1,77 | -3,41 | 0,13570 | -2,26 | -4,79  | 0,03070 | ---             | ---        |
| 7959880 | -1,77 | -3,41 | 0,10399 | -1,53 | -2,89  | 0,14331 | ---             | ASPDH      |
| 8038577 | -1,77 | -3,42 | 0,00003 | -1,88 | -3,68  | 0,00032 | NM_001024656    | ---        |
| 7956783 | -1,77 | -3,42 | 0,03435 | -1,56 | -2,95  | 0,00246 | ---             | FBXO17     |
| 8036686 | -1,77 | -3,42 | 0,06619 | -2,46 | -5,50  | 0,00013 | AK021860        | ---        |
| 7993257 | -1,78 | -3,42 | 0,03238 | -2,12 | -4,34  | 0,00005 | ---             | ---        |
| 8159581 | -1,78 | -3,43 | 0,01273 | -1,77 | -3,40  | 0,00020 | ---             | CGB7       |
| 8038299 | -1,78 | -3,43 | 0,02921 | -0,88 | -1,84  | 0,05251 | NM_033142       | LOC339674  |
| 8073546 | -1,78 | -3,43 | 0,08651 | -2,22 | -4,65  | 0,00422 | NR_024355       | ---        |
| 8135273 | -1,78 | -3,43 | 0,05886 | -1,93 | -3,81  | 0,02810 | ---             | ---        |
| 7951159 | -1,78 | -3,43 | 0,01686 | -1,78 | -3,43  | 0,07027 | ---             | ---        |
| 8132345 | -1,78 | -3,43 | 0,07442 | -0,84 | -1,79  | 0,04429 | ---             | DHH        |
| 7963020 | -1,78 | -3,43 | 0,00043 | -1,49 | -2,80  | 0,00489 | NM_021044       | ---        |
| 8132286 | -1,78 | -3,43 | 0,04166 | -2,21 | -4,62  | 0,00374 | ---             | LOC388282  |
| 7996160 | -1,78 | -3,43 | 0,01179 | 1,19  | 2,27   | 0,07737 | ENST00000335616 | BOP1       |
| 8153678 | -1,78 | -3,43 | 0,01243 | -1,53 | -2,89  | 0,14305 | NM_015201       | TCF15      |
| 8064370 | -1,78 | -3,43 | 0,05433 | -1,36 | -2,58  | 0,00159 | NM_004609       | CRIP3      |
| 8126531 | -1,78 | -3,44 | 0,05670 | -1,03 | -2,04  | 0,16732 | NM_206922       | BATF       |
| 7975793 | -1,78 | -3,44 | 0,00439 | -2,12 | -4,34  | 0,00024 | NM_006399       | ---        |
| 7982356 | -1,78 | -3,44 | 0,21468 | -2,66 | -6,31  | 0,00012 | ---             | ---        |
| 7987046 | -1,78 | -3,44 | 0,21468 | -2,66 | -6,31  | 0,00012 | ---             | ---        |
| 7987137 | -1,78 | -3,44 | 0,21468 | -2,66 | -6,31  | 0,00012 | ---             | EFCAB4B    |
| 7960381 | -1,78 | -3,44 | 0,00307 | -0,78 | -1,72  | 0,19386 | CR627161        | DMRT1      |
| 8154034 | -1,78 | -3,44 | 0,00255 | -1,07 | -2,10  | 0,00950 | NM_021951       | SPANXE     |
| 8175543 | -1,78 | -3,44 | 0,01619 | -1,94 | -3,83  | 0,00189 | NM_145665       | PTMA       |
| 8049083 | -1,78 | -3,44 | 0,09746 | -1,33 | -2,52  | 0,00036 | NM_001099285    | ---        |
| 8005102 | -1,78 | -3,44 | 0,03078 | -2,27 | -4,82  | 0,00165 | ---             | ZNF747     |
| 8000903 | -1,78 | -3,44 | 0,08824 | -1,78 | -3,43  | 0,00395 | NM_023931       | AIF1L      |
| 8158771 | -1,78 | -3,44 | 0,04672 | -0,11 | -1,08  | 0,58812 | NM_031426       | ---        |
| 8088844 | -1,78 | -3,44 | 0,06314 | -1,38 | -2,61  | 0,01126 | ---             | ---        |
| 8021563 | -1,78 | -3,45 | 0,00972 | -1,78 | -3,43  | 0,02264 | ---             | SMTNL2     |
| 8003892 | -1,78 | -3,45 | 0,00508 | -1,45 | -2,73  | 0,01076 | NM_001114974    | FOXN4      |
| 7966189 | -1,79 | -3,45 | 0,05914 | -2,11 | -4,32  | 0,00184 | NM_213596       | RILP       |
| 8011131 | -1,79 | -3,45 | 0,00370 | -1,01 | -2,02  | 0,01056 | NM_031430       | ---        |
| 8106017 | -1,79 | -3,45 | 0,02096 | -2,78 | -6,87  | 0,00033 | ---             | HNF4A      |
| 8062823 | -1,79 | -3,45 | 0,00437 | -1,48 | -2,80  | 0,00083 | NM_000457       | ADRB1      |
| 7930627 | -1,79 | -3,45 | 0,01355 | -1,15 | -2,22  | 0,11861 | NM_000684       | ---        |
| 8079561 | -1,79 | -3,45 | 0,00701 | -1,79 | -3,47  | 0,00585 | ---             | ---        |
| 8059275 | -1,79 | -3,45 | 0,00514 | -1,62 | -3,07  | 0,01531 | ---             | NCRNA00095 |
| 8000957 | -1,79 | -3,45 | 0,04562 | -1,73 | -3,32  | 0,00032 | NR_024348       | VSX2       |
| 7975696 | -1,79 | -3,45 | 0,00622 | -1,89 | -3,70  | 0,00177 | NM_182894       | SNAPC4     |
| 8165131 | -1,79 | -3,45 | 0,00067 | -1,24 | -2,37  | 0,00136 | NM_003086       | ---        |
| 7988685 | -1,79 | -3,45 | 0,01371 | -2,70 | -6,50  | 0,00712 | ---             | ---        |
| 7910414 | -1,79 | -3,46 | 0,01289 | -2,15 | -4,45  | 0,00012 | ---             | ---        |
| 8155453 | -1,79 | -3,46 | 0,39773 | -5,25 | -37,99 | 0,00016 | ---             | ---        |
| 8161375 | -1,79 | -3,46 | 0,39773 | -5,25 | -37,99 | 0,00016 | ---             | GDF2       |
| 7933366 | -1,79 | -3,46 | 0,03029 | -1,50 | -2,83  | 0,00115 | NM_016204       | DBNDD1     |
| 8003560 | -1,79 | -3,46 | 0,02873 | -0,83 | -1,77  | 0,15295 | NM_024043       | C19orf67   |
| 8034747 | -1,79 | -3,46 | 0,00422 | -1,01 | -2,01  | 0,08905 | ENST00000343945 | SNORD116-4 |
| 7981955 | -1,79 | -3,46 | 0,02398 | -2,36 | -5,15  | 0,00084 | NR_003319       | C19orf35   |
| 8032473 | -1,79 | -3,46 | 0,00617 | -2,48 | -5,58  | 0,00065 | NM_198532       | FXYD3      |
| 8027748 | -1,79 | -3,46 | 0,00607 | 0,20  | 1,15   | 0,64462 | NM_021910       | HCN2       |
| 8023984 | -1,79 | -3,46 | 0,00469 | -1,44 | -2,71  | 0,01140 | NM_001194       | FOXH1      |
| 8153828 | -1,79 | -3,47 | 0,00497 | -2,30 | -4,93  | 0,00018 | NM_003923       | OLIG1      |
| 8068235 | -1,79 | -3,47 | 0,00054 | -1,13 | -2,19  | 0,00889 | NM_138983       | ---        |
| 7916627 | -1,79 | -3,47 | 0,00028 | -1,24 | -2,36  | 0,00053 | ---             | CTRB1      |
| 7997264 | -1,79 | -3,47 | 0,01418 | -1,97 | -3,93  | 0,00173 | NM_001906       | FLJ46361   |
| 7931140 | -1,79 | -3,47 | 0,01046 | -2,20 | -4,60  | 0,00437 | NR_003570       | OR5K2      |
| 8081212 | -1,79 | -3,47 | 0,00020 | -1,18 | -2,27  | 0,00035 | NM_001004737    | ---        |
| 8021374 | -1,79 | -3,47 | 0,03287 | -1,88 | -3,69  | 0,00580 | ---             | C3orf62    |
| 8079742 | -1,79 | -3,47 | 0,05625 | -2,14 | -4,40  | 0,00167 | NM_198562       | IRX1       |
| 8104314 | -1,79 | -3,47 | 0,00060 | -1,62 | -3,07  | 0,00027 | NM_024337       | TNFRSF25   |
| 7912040 | -1,79 | -3,47 | 0,02291 | -1,26 | -2,40  | 0,03018 | NM_148965       | ---        |
| 7916998 | -1,80 | -3,47 | 0,01428 | -1,12 | -2,17  | 0,00734 | ---             | LOC441233  |
| 8139796 | -1,80 | -3,47 | 0,00274 | -1,73 | -3,32  | 0,04868 | AK128010        | ZNF74      |
| 8071382 | -1,80 | -3,47 | 0,00364 | -1,25 | -2,38  | 0,05403 | NM_003426       | PPP3R2     |
| 8162920 | -1,80 | -3,47 | 0,01807 | -1,88 | -3,67  | 0,00221 | NM_147180       | ---        |
| 8010285 | -1,80 | -3,48 | 0,00705 | -1,44 | -2,71  | 0,01574 | ---             | LY6D       |
| 8153359 | -1,80 | -3,48 | 0,01517 | -1,93 | -3,80  | 0,00007 | NM_003695       | TMEM45B    |

|         |       |       |         |       |        |         |                 |              |
|---------|-------|-------|---------|-------|--------|---------|-----------------|--------------|
| 7945169 | -1,80 | -3,48 | 0,08239 | 4,29  | 19,53  | 0,00005 | NM_138788       | ATAD3A       |
| 7896952 | -1,80 | -3,48 | 0,08537 | -0,35 | -1,28  | 0,08777 | NM_018188       | USP6NL       |
| 7926150 | -1,80 | -3,48 | 0,00377 | -2,20 | -4,59  | 0,00175 | NM_014688       | LHX3         |
| 8165083 | -1,80 | -3,49 | 0,00656 | -1,51 | -2,84  | 0,00411 | NM_178138       | ZNF787       |
| 8039569 | -1,80 | -3,49 | 0,00518 | -1,68 | -3,21  | 0,00561 | NM_001002836    | FOXP3        |
| 8172631 | -1,80 | -3,49 | 0,01203 | -1,02 | -2,03  | 0,03631 | NM_014009       | COL11A2      |
| 8125568 | -1,80 | -3,49 | 0,00170 | -1,73 | -3,33  | 0,00024 | NM_080680       | CGB5         |
| 8030187 | -1,80 | -3,49 | 0,01533 | -0,84 | -1,79  | 0,08316 | NM_033043       | ---          |
| 7897559 | -1,80 | -3,49 | 0,00266 | -1,55 | -2,94  | 0,00008 | ---             | ---          |
| 8102775 | -1,80 | -3,49 | 0,00066 | -1,87 | -3,65  | 0,00008 | ---             | CECR4        |
| 8071084 | -1,80 | -3,49 | 0,00678 | -1,16 | -2,23  | 0,14358 | NR_024483       | ---          |
| 7984213 | -1,80 | -3,49 | 0,01153 | -1,47 | -2,77  | 0,00344 | ---             | ---          |
| 7960338 | -1,80 | -3,49 | 0,01399 | -2,17 | -4,51  | 0,06848 | ---             | KRT7         |
| 7955613 | -1,81 | -3,49 | 0,00609 | 3,66  | 12,61  | 0,00046 | NM_005556       | LOC100288313 |
| 7896983 | -1,81 | -3,50 | 0,03220 | -2,24 | -4,74  | 0,00015 | ENST00000366221 | ---          |
| 8001780 | -1,81 | -3,50 | 0,00027 | -1,39 | -2,62  | 0,00508 | ---             | LTA          |
| 8118137 | -1,81 | -3,50 | 0,02536 | -0,74 | -1,67  | 0,02354 | NM_000595       | ---          |
| 7972229 | -1,81 | -3,50 | 0,00357 | -1,65 | -3,15  | 0,00565 | ---             | FAM155B      |
| 8168058 | -1,81 | -3,50 | 0,00732 | 0,29  | 1,22   | 0,17634 | NM_015686       | GPX1         |
| 8087405 | -1,81 | -3,51 | 0,00682 | -1,79 | -3,45  | 0,00010 | NM_201397       | LOC153328    |
| 8108199 | -1,81 | -3,51 | 0,00665 | -2,31 | -4,96  | 0,00002 | NM_145282       | EDARADD      |
| 7910694 | -1,81 | -3,51 | 0,01503 | -1,21 | -2,31  | 0,01944 | NM_080738       | OR51A4       |
| 7946015 | -1,81 | -3,51 | 0,04868 | -1,77 | -3,41  | 0,00171 | NM_001005329    | CDX1         |
| 8109226 | -1,81 | -3,52 | 0,02092 | -1,58 | -2,99  | 0,03316 | NM_001804       | LCE1A        |
| 7905528 | -1,81 | -3,52 | 0,01831 | -1,98 | -3,95  | 0,00130 | NM_178348       | GAPDHS       |
| 8027864 | -1,81 | -3,52 | 0,00077 | -1,23 | -2,34  | 0,00269 | NM_014364       | C2orf27B     |
| 8055291 | -1,81 | -3,52 | 0,04093 | -1,30 | -2,47  | 0,13046 | BC043584 NXNL1  | ---          |
| 8035315 | -1,81 | -3,52 | 0,00874 | -2,29 | -4,90  | 0,00005 | NM_138454       | FCHO1        |
| 8026830 | -1,82 | -3,52 | 0,00035 | -0,98 | -1,97  | 0,07598 | NM_015122       | ---          |
| 8075306 | -1,82 | -3,52 | 0,03366 | -1,85 | -3,62  | 0,01419 | ---             | FLJ40448     |
| 7997832 | -1,82 | -3,52 | 0,00099 | -0,73 | -1,66  | 0,08449 | ENST00000333666 | ---          |
| 8116571 | -1,82 | -3,52 | 0,10544 | -5,95 | -62,00 | 0,00010 | ---             | OLFM2        |
| 8033818 | -1,82 | -3,52 | 0,00347 | 0,85  | 1,80   | 0,47146 | NM_058164       | VTRNA1-2     |
| 8108629 | -1,82 | -3,53 | 0,01059 | -1,44 | -2,71  | 0,00141 | NR_026704       | ---          |
| 8104928 | -1,82 | -3,53 | 0,01111 | -2,72 | -6,57  | 0,02205 | ---             | ---          |
| 7971216 | -1,82 | -3,53 | 0,01311 | -1,90 | -3,73  | 0,00168 | ---             | ---          |
| 8045332 | -1,82 | -3,53 | 0,04909 | -2,45 | -5,48  | 0,00172 | ---             | PXMP2        |
| 7967789 | -1,82 | -3,53 | 0,00303 | -1,59 | -3,00  | 0,00672 | NM_018663       | HAPLN4       |
| 8035646 | -1,82 | -3,53 | 0,01413 | -2,43 | -5,39  | 0,00590 | NM_023002       | ---          |
| 8115166 | -1,82 | -3,53 | 0,00151 | -1,53 | -2,90  | 0,01655 | ---             | SNORD116-2   |
| 7981951 | -1,82 | -3,53 | 0,08579 | -3,92 | -15,10 | 0,00004 | NR_003317       | LOC390414    |
| 7932881 | -1,82 | -3,53 | 0,00753 | -1,58 | -3,00  | 0,04920 | AK094743        | ---          |
| 8173428 | -1,82 | -3,53 | 0,04074 | -2,50 | -5,66  | 0,00148 | ---             | ---          |
| 8101061 | -1,82 | -3,53 | 0,27500 | -4,51 | -22,75 | 0,00118 | ---             | PF4          |
| 8100966 | -1,82 | -3,54 | 0,02430 | -1,15 | -2,22  | 0,00331 | NM_002619       | ---          |
| 8085786 | -1,82 | -3,54 | 0,03645 | -1,72 | -3,30  | 0,00348 | ---             | HSPA7        |
| 7906775 | -1,82 | -3,54 | 0,19803 | -1,26 | -2,39  | 0,07117 | NR_024151       | ---          |
| 7979125 | -1,82 | -3,54 | 0,00020 | -2,16 | -4,47  | 0,00003 | ---             | CGB5         |
| 8038292 | -1,82 | -3,54 | 0,01602 | -0,95 | -1,93  | 0,07053 | NM_033043       | ---          |
| 7971998 | -1,82 | -3,54 | 0,01385 | -2,23 | -4,69  | 0,01661 | ---             | ---          |
| 8152094 | -1,82 | -3,54 | 0,00195 | -2,49 | -5,62  | 0,00090 | ---             | ---          |
| 7939240 | -1,82 | -3,54 | 0,00380 | -0,99 | -1,99  | 0,04179 | ---             | C10orf47     |
| 7926158 | -1,82 | -3,54 | 0,00250 | 0,82  | 1,77   | 0,03569 | NM_153256       | UGP2         |
| 8052624 | -1,82 | -3,54 | 0,00462 | -1,77 | -3,40  | 0,00359 | NM_001001521    | ---          |
| 8094741 | -1,83 | -3,54 | 0,08199 | -2,14 | -4,40  | 0,00016 | ---             | ---          |
| 8175267 | -1,83 | -3,55 | 0,03388 | -1,94 | -3,84  | 0,00016 | ---             | LBXCOR1      |
| 7984436 | -1,83 | -3,55 | 0,00911 | -1,24 | -2,36  | 0,03405 | NM_001031807    | C12orf34     |
| 7958577 | -1,83 | -3,55 | 0,03663 | -1,70 | -3,24  | 0,00223 | NM_032829       | MADCAM1      |
| 8023941 | -1,83 | -3,55 | 0,06413 | -2,22 | -4,66  | 0,00470 | NM_130760       | ---          |
| 8053549 | -1,83 | -3,55 | 0,00119 | -1,25 | -2,37  | 0,01963 | ---             | KIR2DL3      |
| 8031293 | -1,83 | -3,55 | 0,15167 | -3,02 | -8,12  | 0,02254 | NM_015868       | CRYAA        |
| 8068883 | -1,83 | -3,55 | 0,02764 | -3,02 | -8,13  | 0,00003 | NM_000394       | HOXD11       |
| 8046530 | -1,83 | -3,55 | 0,00091 | -0,81 | -1,75  | 0,01141 | NM_021192       | ---          |
| 7968295 | -1,83 | -3,55 | 0,03573 | -0,89 | -1,85  | 0,00845 | ---             | LOC80154     |
| 7990952 | -1,83 | -3,55 | 0,02737 | 0,61  | 1,52   | 0,22203 | NR_026811       | ---          |
| 8152463 | -1,83 | -3,55 | 0,00287 | -1,88 | -3,67  | 0,00151 | ---             | ---          |
| 8139883 | -1,83 | -3,55 | 0,00774 | -1,38 | -2,60  | 0,02450 | ---             | OXCT2        |
| 7900352 | -1,83 | -3,55 | 0,00064 | -1,22 | -2,33  | 0,01798 | NM_022120       | OXCT2        |
| 7915257 | -1,83 | -3,55 | 0,00064 | -1,22 | -2,33  | 0,01798 | NM_022120       | THEG         |
| 8032023 | -1,83 | -3,55 | 0,00910 | -2,02 | -4,06  | 0,00223 | NM_016585       | FOXD2        |
| 7901311 | -1,83 | -3,55 | 0,07821 | -1,20 | -2,29  | 0,01903 | NM_004474       | GABRR1       |
| 8128087 | -1,83 | -3,56 | 0,03934 | -1,49 | -2,80  | 0,00517 | NM_002042       | SOX17        |
| 8146462 | -1,83 | -3,56 | 0,00455 | -1,09 | -2,13  | 0,10499 | NM_022454       | S1PR4        |

|         |       |       |         |       |        |         |              |           |
|---------|-------|-------|---------|-------|--------|---------|--------------|-----------|
| 8024582 | -1,83 | -3,56 | 0,01647 | -1,19 | -2,29  | 0,07644 | NM_003775    | RAMP1     |
| 8049567 | -1,83 | -3,56 | 0,01202 | -1,60 | -3,03  | 0,00081 | NM_005855    | ---       |
| 7998053 | -1,83 | -3,56 | 0,01467 | -0,93 | -1,91  | 0,02789 | ---          | PAK1      |
| 7942769 | -1,83 | -3,56 | 0,01006 | -2,46 | -5,52  | 0,00019 | NM_001128620 | GPRC6A    |
| 8129125 | -1,83 | -3,56 | 0,02806 | -1,19 | -2,28  | 0,00872 | NM_148963    | RTN4R     |
| 8074558 | -1,83 | -3,57 | 0,01684 | -1,10 | -2,14  | 0,13642 | NM_023004    | UFSP1     |
| 8141643 | -1,84 | -3,57 | 0,02235 | -1,69 | -3,23  | 0,00677 | NM_001015072 | NPPC      |
| 8059739 | -1,84 | -3,57 | 0,02862 | -3,11 | -8,64  | 0,00015 | NM_024409    | ---       |
| 7902225 | -1,84 | -3,57 | 0,00118 | -1,64 | -3,13  | 0,00017 | ---          | PRRX2     |
| 8158554 | -1,84 | -3,57 | 0,01419 | -1,48 | -2,79  | 0,01570 | NM_016307    | KCNA1     |
| 7953274 | -1,84 | -3,57 | 0,02348 | -2,79 | -6,90  | 0,00027 | NM_000217    | C10orf110 |
| 7925846 | -1,84 | -3,57 | 0,02368 | -1,33 | -2,51  | 0,02747 | NR_024628    | FOXL1     |
| 7997735 | -1,84 | -3,58 | 0,02582 | -2,44 | -5,41  | 0,00890 | NM_005250    | EID2      |
| 8036749 | -1,84 | -3,58 | 0,00565 | -1,84 | -3,57  | 0,00205 | NM_153232    | IL27      |
| 8000567 | -1,84 | -3,58 | 0,01179 | -1,66 | -3,15  | 0,02393 | NM_145659    | ---       |
| 8001231 | -1,84 | -3,58 | 0,07765 | -2,45 | -5,46  | 0,00020 | ---          | C21orf70  |
| 8069174 | -1,84 | -3,58 | 0,02717 | -0,27 | -1,20  | 0,79371 | AF391113     | FAM57B    |
| 8000772 | -1,84 | -3,58 | 0,03255 | -2,18 | -4,53  | 0,05040 | NM_031478    | ZC3H12D   |
| 8130073 | -1,84 | -3,58 | 0,00893 | -1,97 | -3,90  | 0,00255 | NM_207360    | SRP19     |
| 8107350 | -1,84 | -3,58 | 0,01252 | -2,31 | -4,96  | 0,00030 | NM_003135    | MCART3P   |
| 8120460 | -1,84 | -3,58 | 0,03914 | -1,08 | -2,11  | 0,00123 | NR_026540    | OR56A3    |
| 7938066 | -1,84 | -3,59 | 0,04496 | -2,33 | -5,04  | 0,02594 | NM_001003443 | PANX2     |
| 8073992 | -1,84 | -3,59 | 0,00290 | -0,29 | -1,22  | 0,57924 | NM_052839    | SIGLEC8   |
| 8038839 | -1,84 | -3,59 | 0,00922 | -1,82 | -3,53  | 0,00607 | NM_014442    | ---       |
| 8148465 | -1,84 | -3,59 | 0,00732 | -1,29 | -2,44  | 0,02827 | ---          | RNASE7    |
| 7973149 | -1,84 | -3,59 | 0,01887 | -1,44 | -2,71  | 0,00075 | NM_032572    | FAM71F2   |
| 8135933 | -1,84 | -3,59 | 0,07723 | -1,42 | -2,68  | 0,00076 | NM_001012454 | ---       |
| 8168733 | -1,84 | -3,59 | 0,00042 | -1,41 | -2,66  | 0,00039 | ---          | ---       |
| 8102230 | -1,85 | -3,59 | 0,00046 | -2,19 | -4,56  | 0,00070 | ---          | OR7G1     |
| 8033736 | -1,85 | -3,60 | 0,03076 | -1,32 | -2,49  | 0,02028 | NM_001005192 | C1orf92   |
| 7906284 | -1,85 | -3,60 | 0,00026 | -1,64 | -3,13  | 0,00059 | NM_144702    | YJEFN3    |
| 8027213 | -1,85 | -3,60 | 0,01389 | -1,41 | -2,66  | 0,00411 | NM_198537    | ZDHHC3    |
| 8086503 | -1,85 | -3,60 | 0,04171 | -0,89 | -1,86  | 0,11200 | NM_001135179 | NTN3      |
| 7992632 | -1,85 | -3,60 | 0,00893 | -1,87 | -3,66  | 0,00251 | NM_006181    | JPH4      |
| 7978093 | -1,85 | -3,60 | 0,00409 | -1,57 | -2,97  | 0,01765 | NM_032452    | ---       |
| 7909839 | -1,85 | -3,60 | 0,00132 | -1,69 | -3,22  | 0,00041 | ---          | ---       |
| 8140850 | -1,85 | -3,60 | 0,01748 | -1,42 | -2,67  | 0,00119 | ---          | ---       |
| 8163326 | -1,85 | -3,60 | 0,01707 | -1,62 | -3,08  | 0,00005 | ---          | KCNE1L    |
| 8174469 | -1,85 | -3,60 | 0,00546 | -1,95 | -3,87  | 0,00144 | NM_012282    | MGC16121  |
| 8175256 | -1,85 | -3,61 | 0,00023 | -1,71 | -3,26  | 0,00003 | NR_024607    | CALML3    |
| 7925972 | -1,85 | -3,61 | 0,00826 | -2,12 | -4,34  | 0,00005 | NM_005185    | HMX1      |
| 8104136 | -1,85 | -3,61 | 0,00052 | -1,86 | -3,62  | 0,00492 | NM_018942    | ---       |
| 8071390 | -1,85 | -3,61 | 0,03331 | -2,29 | -4,89  | 0,00010 | ---          | RFPL1     |
| 8072226 | -1,85 | -3,61 | 0,00900 | -0,67 | -1,59  | 0,00335 | NM_021026    | DUX4      |
| 7931665 | -1,85 | -3,61 | 0,20669 | -4,68 | -25,62 | 0,00003 | NM_033178    | C1orf113  |
| 7900129 | -1,85 | -3,61 | 0,00035 | -1,20 | -2,29  | 0,00209 | NM_024676    | CCDC48    |
| 8082465 | -1,85 | -3,61 | 0,07759 | -1,92 | -3,78  | 0,00527 | NM_024768    | ---       |
| 8168436 | -1,85 | -3,61 | 0,10474 | -1,38 | -2,60  | 0,06573 | ---          | RASAL3    |
| 8035050 | -1,85 | -3,62 | 0,00045 | -1,02 | -2,02  | 0,02392 | NM_022904    | RAX       |
| 8023549 | -1,85 | -3,62 | 0,00989 | -1,98 | -3,94  | 0,00005 | NM_013435    | SNCB      |
| 8115948 | -1,85 | -3,62 | 0,03875 | -1,64 | -3,12  | 0,00048 | NM_001001502 | ---       |
| 7903090 | -1,86 | -3,62 | 0,09230 | -3,06 | -8,36  | 0,01449 | ---          | ---       |
| 8066567 | -1,86 | -3,62 | 0,02069 | -1,80 | -3,48  | 0,00202 | ---          | C1orf35   |
| 7924842 | -1,86 | -3,62 | 0,01397 | -1,06 | -2,08  | 0,03147 | NM_024319    | AADA3L3   |
| 7897960 | -1,86 | -3,62 | 0,03132 | -1,36 | -2,57  | 0,05302 | NM_001103170 | LOC389607 |
| 8148982 | -1,86 | -3,62 | 0,00817 | -1,55 | -2,93  | 0,02697 | AK128318     | DUX4      |
| 8104122 | -1,86 | -3,62 | 0,14831 | -4,09 | -17,02 | 0,00064 | NM_033178    | IL1F5     |
| 8044552 | -1,86 | -3,63 | 0,02890 | -1,30 | -2,45  | 0,05821 | NM_173170    | ---       |
| 8154844 | -1,86 | -3,63 | 0,00465 | -1,88 | -3,69  | 0,00001 | ---          | MTHFD2L   |
| 8101000 | -1,86 | -3,63 | 0,02432 | -2,55 | -5,85  | 0,00064 | NM_001144978 | ---       |
| 8023308 | -1,86 | -3,64 | 0,00679 | -1,80 | -3,47  | 0,01359 | ---          | ---       |
| 8156547 | -1,86 | -3,64 | 0,00513 | -2,27 | -4,81  | 0,00003 | ---          | FLJ31958  |
| 7933638 | -1,86 | -3,64 | 0,06681 | -1,27 | -2,42  | 0,00454 | AK056520     | ---       |
| 7898734 | -1,86 | -3,64 | 0,01360 | -2,50 | -5,66  | 0,00298 | ---          | ---       |
| 8003087 | -1,86 | -3,64 | 0,05458 | -2,16 | -4,46  | 0,00165 | ---          | LILRA4    |
| 8039246 | -1,86 | -3,64 | 0,01354 | -1,09 | -2,13  | 0,01506 | NM_012276    | ACSM2A    |
| 7993737 | -1,86 | -3,64 | 0,02805 | -2,16 | -4,48  | 0,00004 | NM_001010845 | ---       |
| 8075057 | -1,86 | -3,64 | 0,16872 | -4,41 | -21,21 | 0,00025 | ---          | ---       |
| 7899882 | -1,87 | -3,64 | 0,00162 | -1,20 | -2,30  | 0,00238 | ---          | ---       |
| 8092218 | -1,87 | -3,64 | 0,00031 | -2,18 | -4,53  | 0,00225 | ---          | DOK3      |
| 8116086 | -1,87 | -3,64 | 0,01645 | -0,57 | -1,48  | 0,34794 | NM_024872    | CHRNA7    |
| 7982341 | -1,87 | -3,64 | 0,11776 | -1,13 | -2,18  | 0,06651 | NM_000746    | ---       |
| 8162568 | -1,87 | -3,64 | 0,01040 | -1,86 | -3,62  | 0,06259 | ---          | ---       |

|         |       |       |         |       |        |         |                 |            |  |
|---------|-------|-------|---------|-------|--------|---------|-----------------|------------|--|
| 7945130 | -1,87 | -3,65 | 0,00915 | -1,75 | -3,36  | 0,00401 | ---             | SYNGR4     |  |
| 8030015 | -1,87 | -3,65 | 0,01618 | -2,16 | -4,47  | 0,00129 | NM_012451       | CCDC42B    |  |
| 7958942 | -1,87 | -3,65 | 0,00160 | -1,32 | -2,49  | 0,05042 | NM_001144872    | HFE2       |  |
| 7904717 | -1,87 | -3,65 | 0,00018 | -1,39 | -2,63  | 0,00138 | NM_213653       | ANKRD33B   |  |
| 8104499 | -1,87 | -3,65 | 0,01057 | -1,85 | -3,61  | 0,00016 | NM_001164440    | C21orf67   |  |
| 8070847 | -1,87 | -3,65 | 0,02006 | -1,06 | -2,09  | 0,07359 | NR_027128       | FLJ35379   |  |
| 7969472 | -1,87 | -3,65 | 0,03828 | -1,48 | -2,78  | 0,00105 | ENST00000318245 | ---        |  |
| 8095260 | -1,87 | -3,65 | 0,02837 | -1,84 | -3,57  | 0,01012 | ---             | C2orf70    |  |
| 8040690 | -1,87 | -3,65 | 0,07716 | -1,37 | -2,59  | 0,00682 | NM_001105519    | DUX4       |  |
| 7931656 | -1,87 | -3,65 | 0,20693 | -4,67 | -25,47 | 0,00003 | NM_033178       | DUX4       |  |
| 7931659 | -1,87 | -3,65 | 0,20693 | -4,67 | -25,47 | 0,00003 | NM_033178       | DUX4       |  |
| 7931662 | -1,87 | -3,65 | 0,20693 | -4,67 | -25,47 | 0,00003 | NM_033178       | DUX4       |  |
| 7931668 | -1,87 | -3,65 | 0,20693 | -4,67 | -25,47 | 0,00003 | NM_033178       | DUX4       |  |
| 7931671 | -1,87 | -3,65 | 0,20693 | -4,67 | -25,47 | 0,00003 | NM_033178       | ---        |  |
| 8028117 | -1,87 | -3,65 | 0,02261 | -3,43 | -10,77 | 0,00095 | ---             | PRDM13     |  |
| 8121216 | -1,87 | -3,65 | 0,04189 | -3,14 | -8,81  | 0,00109 | NM_021620       | EGFL7      |  |
| 8159354 | -1,87 | -3,65 | 0,02280 | -1,44 | -2,71  | 0,00070 | NM_016215       | GRIK5      |  |
| 8037103 | -1,87 | -3,65 | 0,00090 | -0,86 | -1,82  | 0,19149 | NM_002088       | CGB        |  |
| 8038280 | -1,87 | -3,66 | 0,01167 | -1,01 | -2,02  | 0,05843 | NM_000737       | ---        |  |
| 8131379 | -1,87 | -3,66 | 0,02794 | -1,55 | -2,93  | 0,00065 | ---             | CAPS       |  |
| 8025004 | -1,87 | -3,66 | 0,06359 | -0,93 | -1,91  | 0,03215 | NM_004058       | ZNF446     |  |
| 8031962 | -1,87 | -3,66 | 0,00901 | -1,57 | -2,98  | 0,06572 | NM_017908       | PYY2       |  |
| 8005833 | -1,87 | -3,66 | 0,03322 | -2,29 | -4,91  | 0,00508 | NR_003064       | ---        |  |
| 8012518 | -1,87 | -3,66 | 0,00088 | -1,89 | -3,71  | 0,01036 | ---             | LRRC26     |  |
| 8165453 | -1,87 | -3,67 | 0,02929 | -1,83 | -3,55  | 0,00165 | NM_001013653    | ---        |  |
| 7967707 | -1,87 | -3,67 | 0,00733 | -1,92 | -3,79  | 0,00007 | ---             | NEU4       |  |
| 8049942 | -1,87 | -3,67 | 0,00181 | -1,62 | -3,06  | 0,02691 | NM_080741       | NCRNA00167 |  |
| 7945177 | -1,88 | -3,67 | 0,00595 | -2,01 | -4,03  | 0,00351 | NR_024233       | SLC22A20   |  |
| 7941203 | -1,88 | -3,67 | 0,06702 | -1,45 | -2,74  | 0,03284 | NR_033396       | RBP3       |  |
| 7933359 | -1,88 | -3,67 | 0,00236 | -1,59 | -3,01  | 0,00000 | NM_002900       | ---        |  |
| 8138155 | -1,88 | -3,67 | 0,10048 | -2,91 | -7,53  | 0,00029 | ---             | KIR3DL1    |  |
| 8031344 | -1,88 | -3,68 | 0,03122 | -1,73 | -3,33  | 0,12102 | NM_013289       | OR8H1      |  |
| 7948127 | -1,88 | -3,68 | 0,00335 | -1,54 | -2,90  | 0,01566 | NM_001005199    | ---        |  |
| 7960514 | -1,88 | -3,68 | 0,01506 | -2,41 | -5,30  | 0,00797 | ---             | POM121L4P  |  |
| 8071411 | -1,88 | -3,68 | 0,00311 | -1,77 | -3,41  | 0,00204 | NR_024592       | ---        |  |
| 7929945 | -1,88 | -3,68 | 0,00011 | -1,23 | -2,34  | 0,00892 | ---             | ---        |  |
| 7986945 | -1,88 | -3,68 | 0,22368 | -2,69 | -6,47  | 0,00038 | ---             | ---        |  |
| 8001327 | -1,88 | -3,68 | 0,02107 | -2,61 | -6,09  | 0,00036 | ---             | ---        |  |
| 8007069 | -1,88 | -3,68 | 0,21377 | -4,47 | -22,15 | 0,00020 | NR_033356       | ---        |  |
| 8060526 | -1,88 | -3,69 | 0,00978 | -1,20 | -2,30  | 0,00884 | ---             | ---        |  |
| 7980065 | -1,88 | -3,69 | 0,03678 | -2,49 | -5,62  | 0,01158 | ---             | ---        |  |
| 7908639 | -1,88 | -3,69 | 0,00244 | -0,70 | -1,62  | 0,16004 | NM_018265       | ---        |  |
| 8077779 | -1,88 | -3,69 | 0,03385 | -2,08 | -4,23  | 0,02137 | ---             | ---        |  |
| 7899795 | -1,88 | -3,69 | 0,14883 | -4,08 | -16,94 | 0,00000 | ---             | ---        |  |
| 7995088 | -1,88 | -3,69 | 0,00439 | -1,36 | -2,58  | 0,01725 | NM_001008274    | FZD9       |  |
| 8133335 | -1,88 | -3,69 | 0,00821 | -0,85 | -1,80  | 0,15572 | NM_003508       | MESP2      |  |
| 7985920 | -1,88 | -3,69 | 0,02395 | -1,56 | -2,95  | 0,08686 | NM_001039958    | ---        |  |
| 7998392 | -1,89 | -3,69 | 0,00263 | -1,45 | -2,74  | 0,06147 | ---             | ---        |  |
| 8048896 | -1,89 | -3,70 | 0,00274 | -1,33 | -2,52  | 0,00056 | ---             | ---        |  |
| 8161171 | -1,89 | -3,70 | 0,00889 | -2,83 | -7,09  | 0,00146 | ---             | ---        |  |
| 8098730 | -1,89 | -3,70 | 0,20449 | -4,55 | -23,40 | 0,00007 | NM_033178       | DUX4       |  |
| 8098743 | -1,89 | -3,70 | 0,20449 | -4,55 | -23,40 | 0,00007 | NM_033178       | C11orf92   |  |
| 7951593 | -1,89 | -3,70 | 0,00201 | -1,52 | -2,88  | 0,00032 | NM_207429       | SAMD11     |  |
| 7896761 | -1,89 | -3,70 | 0,01174 | -1,38 | -2,59  | 0,00344 | NM_152486       | MSI1       |  |
| 7967039 | -1,89 | -3,70 | 0,01013 | -0,23 | -1,17  | 0,71793 | NM_002442       | ---        |  |
| 7909626 | -1,89 | -3,70 | 0,01091 | -2,02 | -4,07  | 0,00288 | ---             | ---        |  |
| 8164870 | -1,89 | -3,70 | 0,04056 | -1,49 | -2,81  | 0,00402 | ---             | ---        |  |
| 7982751 | -1,89 | -3,70 | 0,00859 | -1,56 | -2,96  | 0,00260 | ---             | ---        |  |
| 8098721 | -1,89 | -3,71 | 0,04890 | -2,59 | -6,01  | 0,00641 | ---             | ---        |  |
| 7981512 | -1,89 | -3,71 | 0,00379 | -0,75 | -1,68  | 0,19645 | ---             | ---        |  |
| 7985431 | -1,89 | -3,71 | 0,02423 | 0,63  | 1,55   | 0,21804 | NR_026811       | LOC441245  |  |
| 8139887 | -1,89 | -3,71 | 0,02266 | -1,03 | -2,04  | 0,24721 | AK090474        | ---        |  |
| 7928365 | -1,89 | -3,71 | 0,00496 | -1,28 | -2,42  | 0,00425 | ---             | ---        |  |
| 8025301 | -1,89 | -3,71 | 0,02935 | -1,73 | -3,31  | 0,19803 | ---             | ---        |  |
| 7916568 | -1,89 | -3,71 | 0,05557 | -3,38 | -10,39 | 0,00080 | NM_021155       | DAB1       |  |
| 7915435 | -1,89 | -3,71 | 0,01199 | -2,55 | -5,87  | 0,00075 | AF263547        | CLDN19     |  |
| 8170232 | -1,89 | -3,71 | 0,08876 | -0,79 | -1,73  | 0,03367 | NM_001123395    | ---        |  |
| 8076655 | -1,89 | -3,71 | 0,00309 | -1,62 | -3,07  | 0,03417 | ---             | ---        |  |
| 8071414 | -1,89 | -3,71 | 0,00748 | -1,14 | -2,21  | 0,16894 | NM_138814       | TMEM191A   |  |
| 7931840 | -1,89 | -3,71 | 0,04347 | -2,02 | -4,07  | 0,00064 | NR_026815       | AKR1CL1    |  |
| 8019851 | -1,89 | -3,71 | 0,00575 | -2,48 | -5,59  | 0,00187 | NR_027916       | ADCYAP1    |  |
| 8049952 | -1,89 | -3,71 | 0,01943 | -2,24 | -4,74  | 0,01765 | NM_001099733    | C2orf85    |  |
| 7979357 | -1,89 | -3,72 | 0,02341 | -1,93 | -3,82  | 0,00005 | NM_173821       | OTX2       |  |
|         |       |       |         |       |        |         | NM_021728       | ---        |  |

|         |       |       |         |       |        |         |                        |                        |           |
|---------|-------|-------|---------|-------|--------|---------|------------------------|------------------------|-----------|
| 8078395 | -1,89 | -3,72 | 0,00180 | -2,34 | -5,06  | 0,00012 | ---                    | FXVD7                  |           |
| 8027770 | -1,89 | -3,72 | 0,00898 | -1,78 | -3,44  | 0,03352 | NM_022006              |                        | GDF7      |
| 8040479 | -1,89 | -3,72 | 0,01933 | -1,20 | -2,30  | 0,00613 | NM_182828              |                        | C1orf213  |
| 7898858 | -1,89 | -3,72 | 0,00265 | -1,54 | -2,90  | 0,01309 | NM_138479              |                        | RBMXL2    |
| 7938208 | -1,89 | -3,72 | 0,00120 | -2,23 | -4,68  | 0,00345 | NM_014469              |                        | FBXL8     |
| 7996423 | -1,90 | -3,72 | 0,00584 | -1,30 | -2,47  | 0,05729 | NM_018378              |                        | ---       |
| 8010622 | -1,90 | -3,72 | 0,00217 | -1,92 | -3,77  | 0,01299 | ---                    | TMEM198                |           |
| 8048628 | -1,90 | -3,72 | 0,03817 | -1,11 | -2,17  | 0,00560 | NM_001005209           |                        | PLA2G2D   |
| 7913226 | -1,90 | -3,72 | 0,02570 | -2,49 | -5,62  | 0,00719 | NM_012400              |                        | MIR187    |
| 8022912 | -1,90 | -3,73 | 0,03264 | -2,15 | -4,43  | 0,00109 | NR_029616              |                        | TMEM105   |
| 8019177 | -1,90 | -3,73 | 0,01572 | -1,63 | -3,10  | 0,01916 | NM_178520              |                        | C19orf71  |
| 8024655 | -1,90 | -3,73 | 0,02478 | -1,89 | -3,71  | 0,01549 | NM_001135580           |                        | LOC388428 |
| 8010583 | -1,90 | -3,73 | 0,00972 | -1,78 | -3,45  | 0,01648 | NR_027255              |                        | ---       |
| 8001776 | -1,90 | -3,73 | 0,00153 | -2,21 | -4,62  | 0,00021 | ---                    | FUT7                   |           |
| 8165398 | -1,90 | -3,73 | 0,04055 | -1,31 | -2,49  | 0,05514 | NM_004479              |                        | TFF1      |
| 8070579 | -1,90 | -3,73 | 0,01872 | -3,03 | -8,18  | 0,00024 | NM_003225              |                        | TNFSF8    |
| 8163629 | -1,90 | -3,73 | 0,01391 | -1,66 | -3,17  | 0,02036 | NM_001244              |                        | ---       |
| 8046788 | -1,90 | -3,74 | 0,00302 | -1,66 | -3,16  | 0,00625 | ---                    | KRTAP12-1 // KRTAP12-1 |           |
| 8070795 | -1,90 | -3,74 | 0,00872 | -3,07 | -8,42  | 0,00121 | NM_181686 // NM_181686 |                        | KCTD17    |
| 8072784 | -1,90 | -3,74 | 0,01399 | -1,80 | -3,49  | 0,00315 | NM_024681              |                        | FAM69B    |
| 8159373 | -1,90 | -3,74 | 0,00184 | 1,95  | 3,85   | 0,04025 | NM_152421              |                        | ECEL1     |
| 8059748 | -1,90 | -3,74 | 0,00447 | -2,73 | -6,62  | 0,00026 | NM_004826              |                        | KRTAP10-2 |
| 8070777 | -1,90 | -3,74 | 0,03254 | -4,00 | -15,96 | 0,00017 | NM_198693              |                        | TNNI3     |
| 8039353 | -1,90 | -3,74 | 0,00504 | -1,40 | -2,63  | 0,02258 | NM_000363              |                        | ---       |
| 8098723 | -1,90 | -3,74 | 0,01391 | -1,85 | -3,60  | 0,00031 | ---                    | FAM132A                |           |
| 7911435 | -1,90 | -3,74 | 0,00449 | -0,94 | -1,92  | 0,02713 | NM_001014980           |                        | C22orf15  |
| 8071745 | -1,90 | -3,74 | 0,00086 | -1,37 | -2,58  | 0,01374 | NM_182520              |                        | PTH2      |
| 8038362 | -1,90 | -3,74 | 0,03370 | -1,59 | -3,02  | 0,13763 | NM_178449              |                        | LOC375295 |
| 8056968 | -1,90 | -3,74 | 0,00621 | -1,35 | -2,55  | 0,01622 | BC013588               | HELT                   |           |
| 8098571 | -1,90 | -3,74 | 0,00140 | -2,02 | -4,04  | 0,00913 | NM_001029887           |                        | ---       |
| 8167441 | -1,90 | -3,74 | 0,00305 | -2,22 | -4,65  | 0,00071 | ---                    | GPR144                 |           |
| 8157777 | -1,91 | -3,75 | 0,00735 | -2,25 | -4,75  | 0,00172 | NM_001161808           |                        | ---       |
| 8052380 | -1,91 | -3,75 | 0,04841 | -2,39 | -5,24  | 0,02141 | ---                    | ---                    |           |
| 8140168 | -1,91 | -3,75 | 0,01179 | -0,67 | -1,59  | 0,02215 | ---                    | ---                    |           |
| 7929533 | -1,91 | -3,75 | 0,01167 | -0,23 | -1,17  | 0,54284 | ---                    | ---                    |           |
| 7997226 | -1,91 | -3,75 | 0,00512 | -2,10 | -4,30  | 0,00001 | ---                    | PRB3                   |           |
| 7961300 | -1,91 | -3,76 | 0,04253 | -2,77 | -6,81  | 0,00046 | NM_006249              |                        | ---       |
| 8043470 | -1,91 | -3,76 | 0,01144 | -1,23 | -2,35  | 0,09888 | ---                    | PPL                    |           |
| 7999253 | -1,91 | -3,76 | 0,00159 | -0,80 | -1,75  | 0,16612 | NM_002705              |                        | ---       |
| 7957041 | -1,91 | -3,76 | 0,00665 | -1,31 | -2,48  | 0,06514 | ---                    | TMEM229A               |           |
| 8142685 | -1,91 | -3,76 | 0,03302 | -1,04 | -2,06  | 0,04290 | NM_001136002           |                        | DOHH      |
| 8032595 | -1,91 | -3,76 | 0,01092 | -2,31 | -4,95  | 0,00140 | NM_031304              |                        | ---       |
| 7982267 | -1,91 | -3,76 | 0,14628 | -2,51 | -5,69  | 0,00011 | ---                    | ---                    |           |
| 8111118 | -1,91 | -3,76 | 0,00321 | -1,94 | -3,84  | 0,00175 | ---                    | ---                    |           |
| 8151367 | -1,91 | -3,76 | 0,01757 | -1,55 | -2,92  | 0,02007 | ---                    | ZNF683                 |           |
| 7913965 | -1,91 | -3,76 | 0,00022 | -1,41 | -2,65  | 0,00635 | NM_001114759           |                        | ZDHHC22   |
| 7980344 | -1,91 | -3,76 | 0,02103 | -0,52 | -1,44  | 0,11695 | NM_174976              |                        | USH1G     |
| 8018258 | -1,91 | -3,76 | 0,00355 | -1,48 | -2,79  | 0,00008 | NM_173477              |                        | MFS6L     |
| 8012535 | -1,91 | -3,77 | 0,01491 | -1,55 | -2,93  | 0,00035 | NM_152599              |                        | ---       |
| 8051985 | -1,91 | -3,77 | 0,04126 | -2,41 | -5,32  | 0,00126 | ---                    | FOXE3                  |           |
| 7901309 | -1,91 | -3,77 | 0,00545 | -2,26 | -4,80  | 0,00118 | NM_012186              |                        | FAM87A    |
| 8148968 | -1,91 | -3,77 | 0,00514 | -1,44 | -2,71  | 0,00519 | BC037297               | MIR296                 |           |
| 8067277 | -1,91 | -3,77 | 0,01738 | -2,40 | -5,27  | 0,00089 | NR_029844              |                        | NME3      |
| 7998577 | -1,91 | -3,77 | 0,01943 | -0,94 | -1,92  | 0,10284 | NM_002513              |                        | PDLIM2    |
| 8145175 | -1,92 | -3,77 | 0,00006 | -1,92 | -3,77  | 0,00365 | NM_176871              |                        | ---       |
| 8106528 | -1,92 | -3,77 | 0,03667 | -1,27 | -2,40  | 0,30223 | ---                    | ---                    |           |
| 8061066 | -1,92 | -3,78 | 0,04244 | -0,43 | -1,35  | 0,10666 | ---                    | ---                    |           |
| 7939963 | -1,92 | -3,78 | 0,02001 | -1,77 | -3,42  | 0,03781 | ---                    | ---                    |           |
| 8071523 | -1,92 | -3,78 | 0,03969 | -2,89 | -7,41  | 0,01015 | ---                    | ---                    |           |
| 8074737 | -1,92 | -3,78 | 0,03969 | -2,89 | -7,41  | 0,01015 | ---                    | ---                    |           |
| 8175263 | -1,92 | -3,78 | 0,01457 | -0,69 | -1,61  | 0,02742 | NM_021796              |                        | LOC284412 |
| 8028190 | -1,92 | -3,78 | 0,00095 | -1,24 | -2,36  | 0,00051 | NR_029390              |                        | ---       |
| 8041445 | -1,92 | -3,78 | 0,15883 | -1,11 | -2,16  | 0,05369 | ---                    | ---                    |           |
| 8084878 | -1,92 | -3,78 | 0,11729 | -2,41 | -5,33  | 0,10857 | ---                    | DDC                    |           |
| 8132832 | -1,92 | -3,78 | 0,00018 | -1,46 | -2,74  | 0,12068 | NM_001082971           |                        | ---       |
| 7919267 | -1,92 | -3,78 | 0,00432 | -2,99 | -7,93  | 0,00310 | ---                    | ---                    |           |
| 7919347 | -1,92 | -3,78 | 0,00432 | -2,99 | -7,93  | 0,00310 | ---                    | ---                    |           |
| 8158380 | -1,92 | -3,79 | 0,00420 | -0,64 | -1,56  | 0,09365 | NM_013355              |                        | ---       |
| 8118861 | -1,92 | -3,79 | 0,00738 | -1,95 | -3,85  | 0,00399 | ---                    | ---                    |           |
| 7959085 | -1,92 | -3,79 | 0,01132 | -2,24 | -4,71  | 0,07079 | ---                    | ---                    |           |
| 7980906 | -1,92 | -3,79 | 0,13904 | -1,20 | -2,29  | 0,00894 | ---                    | ---                    |           |
| 7930378 | -1,92 | -3,79 | 0,01671 | -2,28 | -4,86  | 0,01076 | ---                    | TTYH1                  |           |
| 8031157 | -1,92 | -3,79 | 0,00910 | -1,88 | -3,67  | 0,00251 | NM_020659              |                        | APOC3     |



|         |       |       |         |       |       |         |                 |              |
|---------|-------|-------|---------|-------|-------|---------|-----------------|--------------|
| 7944035 | -1,92 | -3,79 | 0,00640 | -2,00 | -4,00 | 0,00376 | NM_000040       | ---          |
| 8074644 | -1,92 | -3,80 | 0,10678 | -2,03 | -4,09 | 0,00941 | ---             | IL28B        |
| 8036702 | -1,92 | -3,80 | 0,01693 | -2,79 | -6,94 | 0,01905 | NM_172139       | DACT2        |
| 8130859 | -1,93 | -3,80 | 0,01049 | -1,68 | -3,21 | 0,01579 | NM_214462       | HES4         |
| 7911376 | -1,93 | -3,80 | 0,02977 | -2,55 | -5,87 | 0,00175 | NM_001142467    | ---          |
| 8011291 | -1,93 | -3,80 | 0,15177 | -2,46 | -5,52 | 0,00388 | ---             | CGB1         |
| 8038288 | -1,93 | -3,81 | 0,04956 | -1,78 | -3,44 | 0,00369 | NM_033377       | RNU4-2       |
| 7967028 | -1,93 | -3,81 | 0,10563 | -1,17 | -2,25 | 0,04918 | NR_003137       | ---          |
| 7935025 | -1,93 | -3,81 | 0,00043 | -2,27 | -4,82 | 0,00047 | ---             | GFAP         |
| 8016128 | -1,93 | -3,81 | 0,00292 | -1,78 | -3,43 | 0,00127 | NM_002055       | ---          |
| 8104319 | -1,93 | -3,81 | 0,00060 | -2,01 | -4,03 | 0,00117 | ---             | ---          |
| 8120273 | -1,93 | -3,81 | 0,02628 | -3,28 | -9,68 | 0,00020 | ---             | COL5A3       |
| 8033825 | -1,93 | -3,82 | 0,00736 | -2,47 | -5,53 | 0,00011 | NM_015719       | N4BP3        |
| 8110430 | -1,93 | -3,82 | 0,00341 | -1,28 | -2,42 | 0,02549 | NM_015111       | ---          |
| 7995477 | -1,93 | -3,82 | 0,14248 | -0,66 | -1,58 | 0,04460 | ---             | VWVC2        |
| 8132805 | -1,93 | -3,82 | 0,00442 | -2,50 | -5,65 | 0,00010 | NM_198570       | ---          |
| 8081546 | -1,93 | -3,82 | 0,04783 | -0,95 | -1,93 | 0,04385 | ---             | AZU1         |
| 8024038 | -1,93 | -3,82 | 0,00498 | -1,67 | -3,19 | 0,01342 | NM_001700       | SMR3A        |
| 8095488 | -1,93 | -3,82 | 0,02500 | -2,83 | -7,11 | 0,00809 | NM_012390       | PGPEP1L      |
| 7991478 | -1,94 | -3,83 | 0,00609 | -0,83 | -1,78 | 0,09925 | NM_001167902    | MIOX         |
| 8074070 | -1,94 | -3,83 | 0,00354 | -1,77 | -3,42 | 0,00126 | NM_017584       | ---          |
| 7949019 | -1,94 | -3,83 | 0,11699 | -1,12 | -2,18 | 0,01554 | ---             | TRIP11       |
| 7976241 | -1,94 | -3,83 | 0,00106 | -0,99 | -1,98 | 0,00966 | ENST00000267622 | ---          |
| 8055247 | -1,94 | -3,83 | 0,00096 | -0,99 | -1,99 | 0,09062 | ---             | AMZ1         |
| 8131195 | -1,94 | -3,83 | 0,00042 | -1,50 | -2,82 | 0,08912 | NM_133463       | ---          |
| 7958453 | -1,94 | -3,84 | 0,01914 | -1,39 | -2,62 | 0,00013 | ---             | OR52E4       |
| 7938061 | -1,94 | -3,84 | 0,01486 | -1,76 | -3,38 | 0,00921 | NM_001005165    | C9orf40      |
| 8161824 | -1,94 | -3,84 | 0,00200 | -0,88 | -1,84 | 0,18311 | NM_017998       | ---          |
| 7959621 | -1,94 | -3,84 | 0,01805 | -2,66 | -6,30 | 0,00012 | ---             | ---          |
| 7975924 | -1,94 | -3,84 | 0,05244 | -2,32 | -5,00 | 0,02350 | ---             | ---          |
| 8154529 | -1,94 | -3,84 | 0,01750 | -1,29 | -2,44 | 0,00344 | ---             | TMEM92       |
| 8008289 | -1,94 | -3,84 | 0,02930 | -0,34 | -1,27 | 0,28944 | NM_153229       | SLC29A4      |
| 8131326 | -1,94 | -3,85 | 0,07021 | 1,40  | 2,64  | 0,03772 | NM_001040661    | MAP3K10      |
| 8028778 | -1,94 | -3,85 | 0,00815 | -0,55 | -1,46 | 0,31381 | NM_002446       | ---          |
| 8174442 | -1,94 | -3,85 | 0,00238 | -2,08 | -4,24 | 0,01801 | ---             | GPR62        |
| 8080158 | -1,94 | -3,85 | 0,00674 | -1,65 | -3,14 | 0,00172 | NM_080865       | ---          |
| 8112335 | -1,95 | -3,86 | 0,01548 | -2,17 | -4,50 | 0,00945 | ---             | LOC100130236 |
| 7919299 | -1,95 | -3,86 | 0,00623 | -1,92 | -3,78 | 0,01984 | AK128227        | LOC100130236 |
| 7919380 | -1,95 | -3,86 | 0,00623 | -1,92 | -3,78 | 0,01984 | AK128227        | ---          |
| 8121273 | -1,95 | -3,86 | 0,02157 | -1,29 | -2,45 | 0,05009 | ---             | ---          |
| 8020139 | -1,95 | -3,87 | 0,04840 | -3,23 | -9,39 | 0,00137 | ---             | PTPRCAP      |
| 7949792 | -1,95 | -3,87 | 0,00471 | -0,84 | -1,79 | 0,18364 | NM_005608       | GATA1        |
| 8167360 | -1,95 | -3,87 | 0,02025 | -2,24 | -4,73 | 0,00033 | NM_002049       | NPPB         |
| 7912520 | -1,95 | -3,87 | 0,02717 | -2,28 | -4,85 | 0,00173 | NM_002521       | BBC3         |
| 8037872 | -1,95 | -3,87 | 0,00762 | -1,90 | -3,73 | 0,01195 | NM_001127240    | ---          |
| 8040467 | -1,95 | -3,87 | 0,00196 | -1,93 | -3,82 | 0,01255 | ---             | C9orf170     |
| 8156196 | -1,95 | -3,87 | 0,08011 | -2,02 | -4,07 | 0,00056 | NM_001001709    | FAM131C      |
| 7912701 | -1,95 | -3,87 | 0,03199 | -1,09 | -2,12 | 0,04999 | NM_182623       | C2orf81      |
| 8053139 | -1,95 | -3,87 | 0,01693 | -1,29 | -2,45 | 0,00331 | NM_001145054    | ---          |
| 8126310 | -1,95 | -3,87 | 0,02405 | -2,62 | -6,13 | 0,00356 | ---             | ---          |
| 8151510 | -1,95 | -3,87 | 0,02692 | -1,87 | -3,65 | 0,00059 | ---             | ---          |
| 8003156 | -1,95 | -3,87 | 0,01603 | -1,93 | -3,81 | 0,00006 | ---             | ZNF579       |
| 8039524 | -1,95 | -3,87 | 0,04484 | -1,95 | -3,87 | 0,00169 | NM_152600       | CCDC155      |
| 8030299 | -1,95 | -3,87 | 0,04064 | -0,88 | -1,85 | 0,04763 | NM_144688       | ---          |
| 7923698 | -1,95 | -3,87 | 0,13135 | -0,75 | -1,68 | 0,03125 | ---             | ---          |
| 8148325 | -1,95 | -3,88 | 0,01855 | -2,19 | -4,57 | 0,01975 | ---             | LOC404266    |
| 8008110 | -1,96 | -3,88 | 0,01689 | -1,54 | -2,90 | 0,03434 | NR_033201       | SLC18A3      |
| 7927502 | -1,96 | -3,88 | 0,02721 | -1,93 | -3,82 | 0,00602 | NM_003055       | C6orf25      |
| 8179313 | -1,96 | -3,89 | 0,00189 | -2,41 | -5,32 | 0,00470 | NM_138277       | PPP1R14D     |
| 7987565 | -1,96 | -3,89 | 0,00418 | -1,25 | -2,37 | 0,00107 | NM_017726       | CRYBA2       |
| 8059019 | -1,96 | -3,89 | 0,02643 | -0,87 | -1,83 | 0,11646 | NM_057093       | TNK1         |
| 8004372 | -1,96 | -3,89 | 0,00553 | -0,56 | -1,47 | 0,11815 | NM_003985       | C10orf95     |
| 7936023 | -1,96 | -3,89 | 0,00126 | -0,28 | -1,22 | 0,00124 | BC126459        | ---          |
| 8055474 | -1,96 | -3,89 | 0,01580 | -1,74 | -3,34 | 0,02821 | ---             | ---          |
| 7898732 | -1,96 | -3,90 | 0,08154 | -1,28 | -2,42 | 0,02266 | ---             | ---          |
| 7981773 | -1,96 | -3,90 | 0,06297 | -0,89 | -1,85 | 0,03464 | ---             | CYBA         |
| 8003322 | -1,96 | -3,90 | 0,02635 | -0,43 | -1,35 | 0,30765 | NM_000101       | ---          |
| 8055348 | -1,96 | -3,90 | 0,01706 | -1,97 | -3,92 | 0,00437 | ---             | SYCN         |
| 8036699 | -1,96 | -3,90 | 0,01680 | -1,65 | -3,13 | 0,01074 | NM_001080468    | INHA         |
| 8048639 | -1,96 | -3,90 | 0,03061 | -1,74 | -3,33 | 0,00098 | NM_002191       | ---          |
| 7999382 | -1,97 | -3,91 | 0,15713 | -3,24 | -9,45 | 0,01318 | ---             | ---          |
| 8135321 | -1,97 | -3,91 | 0,00655 | -1,93 | -3,82 | 0,00154 | ---             | ---          |
| 7906969 | -1,97 | -3,91 | 0,00051 | -2,01 | -4,03 | 0,00137 | ---             | ---          |

|           |       |       |         |       |        |         |                        |              |  |
|-----------|-------|-------|---------|-------|--------|---------|------------------------|--------------|--|
| 8107117   | -1,97 | -3,91 | 0,00130 | -1,95 | -3,86  | 0,00182 | ---                    | LY6G6F       |  |
| 8118235   | -1,97 | -3,91 | 0,00202 | -1,66 | -3,16  | 0,00084 | NM_001003693           | LY6G6F       |  |
| 8178063   | -1,97 | -3,91 | 0,00202 | -1,66 | -3,16  | 0,00084 | NM_001003693           | SIX6         |  |
| 7974793   | -1,97 | -3,92 | 0,01548 | -2,12 | -4,35  | 0,00079 | NM_007374              | HS3ST1       |  |
| 8099388   | -1,97 | -3,92 | 0,00110 | -1,50 | -2,84  | 0,00685 | NM_005114              | WASH3P       |  |
| 8031981   | -1,97 | -3,92 | 0,02367 | -1,62 | -3,08  | 0,00024 | NR_003659              | COL13A1      |  |
| 7928069   | -1,97 | -3,92 | 0,04340 | -2,33 | -5,01  | 0,00024 | NM_001130103           | ---          |  |
| 8112738   | -1,97 | -3,92 | 0,00947 | -0,85 | -1,81  | 0,14107 | ---                    | ---          |  |
| 7905145   | -1,97 | -3,92 | 0,07834 | -1,22 | -2,33  | 0,04411 | ---                    | ---          |  |
| 8071194   | -1,97 | -3,93 | 0,03837 | -2,45 | -5,45  | 0,02150 | ---                    | UTF1         |  |
| 7931553   | -1,97 | -3,93 | 0,01752 | -2,07 | -4,21  | 0,01379 | NM_003577              | KLK6         |  |
| 8038683   | -1,98 | -3,94 | 0,01792 | -1,80 | -3,49  | 0,01150 | NM_002774              | SCGB1C1      |  |
| 7937257   | -1,98 | -3,94 | 0,01151 | -1,41 | -2,65  | 0,02788 | NM_145651              | BIVM         |  |
| 7969933   | -1,98 | -3,94 | 0,00992 | -4,15 | -17,75 | 0,00010 | AK126520               | ---          |  |
| 8073332   | -1,98 | -3,94 | 0,01946 | -2,01 | -4,03  | 0,01876 | ---                    | ---          |  |
| 8096025   | -1,98 | -3,94 | 0,01258 | -0,97 | -1,96  | 0,01307 | ---                    | SH2D7        |  |
| 7985130   | -1,98 | -3,94 | 0,03359 | -1,12 | -2,17  | 0,00144 | NM_001101404           | CFHR4        |  |
| 7908492   | -1,98 | -3,94 | 0,04097 | -1,83 | -3,57  | 0,00431 | NM_006684              | ENDOG        |  |
| 8158418   | -1,98 | -3,95 | 0,00840 | -1,87 | -3,64  | 0,00108 | NM_004435              | TSKS         |  |
| 8038427   | -1,98 | -3,95 | 0,00199 | -1,92 | -3,78  | 0,00008 | NM_021733              | ---          |  |
| 8128327   | -1,98 | -3,95 | 0,05169 | -1,81 | -3,51  | 0,02585 | ---                    | CX3CL1       |  |
| 7996027   | -1,98 | -3,95 | 0,00358 | -1,88 | -3,67  | 0,00052 | NM_002996              | RNASE13      |  |
| 7977642   | -1,98 | -3,95 | 0,03350 | -1,46 | -2,75  | 0,10095 | NM_001012264           | ---          |  |
| 8047215   | -1,98 | -3,95 | 0,00082 | -1,42 | -2,68  | 0,00176 | ---                    | UBE2DNL      |  |
| 8168578   | -1,98 | -3,95 | 0,00248 | -1,42 | -2,67  | 0,00319 | NR_024062              | ---          |  |
| 8059900   | -1,98 | -3,95 | 0,00649 | -1,79 | -3,45  | 0,00033 | ---                    | LOC100133131 |  |
| 8099233   | -1,99 | -3,96 | 0,01244 | -0,92 | -1,89  | 0,03811 | ENST00000446118        | DLGAP3       |  |
| 7914758   | -1,99 | -3,96 | 0,01140 | -2,20 | -4,60  | 0,00003 | NM_001080418           | ---          |  |
| 8161580   | -1,99 | -3,97 | 0,11884 | -2,94 | -7,67  | 0,00000 | ---                    | KRTAP9-3     |  |
| 8007127   | -1,99 | -3,97 | 0,00445 | -1,65 | -3,14  | 0,03062 | NM_031962              | ---          |  |
| 8096615   | -1,99 | -3,97 | 0,00024 | -1,49 | -2,81  | 0,02826 | ---                    | ---          |  |
| 7992843   | -1,99 | -3,97 | 0,06815 | -2,64 | -6,25  | 0,00081 | ---                    | CD19         |  |
| 7994487   | -1,99 | -3,98 | 0,00579 | -1,97 | -3,92  | 0,02214 | NM_001770              | ---          |  |
| 7911566   | -1,99 | -3,98 | 0,00046 | 0,00  | 1,00   | 0,99256 | ---                    | ---          |  |
| 8039945   | -1,99 | -3,98 | 0,00046 | 0,00  | 1,00   | 0,99256 | ---                    | LYPD2        |  |
| 8153342   | -1,99 | -3,98 | 0,01014 | -2,31 | -4,94  | 0,00015 | NM_205545              | SRCIN1       |  |
| 8014679   | -1,99 | -3,98 | 0,00089 | -1,82 | -3,53  | 0,02481 | NM_025248              | DGAT2        |  |
| 7942613   | -1,99 | -3,98 | 0,00144 | -0,43 | -1,35  | 0,06991 | NM_032564              | SYCE1        |  |
| 7937247   | -1,99 | -3,98 | 0,00606 | -1,98 | -3,95  | 0,00768 | NM_130784              | ---          |  |
| 8049237   | -1,99 | -3,98 | 0,08437 | -3,55 | -11,68 | 0,00134 | ---                    | MRPL54       |  |
| 8024708   | -1,99 | -3,98 | 0,01098 | -2,10 | -4,28  | 0,01309 | NM_172251              | ---          |  |
| 7947266   | -2,00 | -3,99 | 0,03162 | -1,74 | -3,33  | 0,00478 | ---                    | LY6H         |  |
| 8153380   | -2,00 | -3,99 | 0,00229 | -1,54 | -2,91  | 0,00044 | NM_001135655           | ---          |  |
| 8161568   | -2,00 | -3,99 | 0,08110 | -2,83 | -7,13  | 0,00021 | ---                    | UAP1L1       |  |
| 8159554   | -2,00 | -3,99 | 0,01934 | -0,85 | -1,80  | 0,23116 | NM_207309              | LOC391764 // |  |
| LOC391764 |       |       |         |       |        |         |                        |              |  |
| 8104617   | -2,00 | -4,00 | 0,00131 | -1,69 | -3,23  | 0,01153 | XM_373076 // XM_373076 | ---          |  |
| 7918548   | -2,00 | -4,00 | 0,00001 | -1,97 | -3,91  | 0,00012 | ---                    | FAM71E2      |  |
| 8039474   | -2,00 | -4,00 | 0,00057 | -1,41 | -2,66  | 0,00823 | NM_001145402           | ---          |  |
| 8081107   | -2,01 | -4,01 | 0,02697 | -2,45 | -5,45  | 0,00115 | ---                    | KIR3DX1      |  |
| 8031200   | -2,01 | -4,02 | 0,00077 | -1,07 | -2,09  | 0,00236 | NR_026716              | NPB          |  |
| 8010696   | -2,01 | -4,02 | 0,05163 | -3,34 | -10,10 | 0,00186 | NM_148896              | NPB          |  |
| 8019693   | -2,01 | -4,02 | 0,05163 | -3,34 | -10,10 | 0,00186 | NM_148896              | ZNF479       |  |
| 8139772   | -2,01 | -4,02 | 0,00027 | -0,55 | -1,46  | 0,01407 | NM_033273              | ---          |  |
| 8147683   | -2,01 | -4,02 | 0,01347 | -2,89 | -7,41  | 0,00272 | ---                    | SP5          |  |
| 8046276   | -2,01 | -4,02 | 0,01304 | -2,32 | -5,01  | 0,00039 | NM_001003845           | H2BFM        |  |
| 8169080   | -2,01 | -4,03 | 0,01638 | -1,79 | -3,46  | 0,00519 | NM_001164416           | HES7         |  |
| 8012344   | -2,01 | -4,03 | 0,00334 | 0,00  | 1,00   | 0,99166 | NM_001165967           | IMP5         |  |
| 8007826   | -2,01 | -4,03 | 0,04755 | -2,53 | -5,76  | 0,00001 | NM_175882              | ---          |  |
| 7972223   | -2,01 | -4,04 | 0,01141 | -2,72 | -6,57  | 0,00003 | ---                    | LOC25845     |  |
| 8110685   | -2,01 | -4,04 | 0,00571 | 0,54  | 1,45   | 0,21568 | NR_024158              | ---          |  |
| 7974339   | -2,01 | -4,04 | 0,05276 | -2,95 | -7,75  | 0,00055 | ---                    | ---          |  |
| 8155847   | -2,01 | -4,04 | 0,03573 | -3,23 | -9,38  | 0,00045 | ---                    | C14orf68     |  |
| 7976755   | -2,02 | -4,05 | 0,00018 | -2,64 | -6,25  | 0,00018 | NM_207117              | ---          |  |
| 8170324   | -2,02 | -4,05 | 0,03590 | -1,68 | -3,20  | 0,02468 | ---                    | LOC126536    |  |
| 8026496   | -2,02 | -4,05 | 0,00540 | -0,98 | -1,97  | 0,04410 | NR_026828              | TRADD        |  |
| 8001938   | -2,02 | -4,05 | 0,00332 | 0,10  | 1,07   | 0,76820 | NM_003789              | ---          |  |
| 7982228   | -2,02 | -4,06 | 0,19833 | -2,74 | -6,66  | 0,00008 | ---                    | ---          |  |
| 7982250   | -2,02 | -4,06 | 0,19833 | -2,74 | -6,66  | 0,00008 | ---                    | ---          |  |
| 7987112   | -2,02 | -4,06 | 0,19833 | -2,74 | -6,66  | 0,00008 | ---                    | ---          |  |
| 8142522   | -2,02 | -4,06 | 0,00315 | -1,91 | -3,76  | 0,02044 | ---                    | LCE3B        |  |
| 7905492   | -2,02 | -4,06 | 0,03165 | -1,65 | -3,15  | 0,06952 | NM_178433              | FLJ41327     |  |
| 8049959   | -2,02 | -4,06 | 0,03594 | -2,06 | -4,16  | 0,00087 | AK123321               | ---          |  |

|         |       |       |         |       |        |         |                 |              |  |
|---------|-------|-------|---------|-------|--------|---------|-----------------|--------------|--|
| 7905569 | -2,02 | -4,06 | 0,02822 | -1,64 | -3,11  | 0,00782 | ---             | ---          |  |
| 8100832 | -2,02 | -4,07 | 0,00040 | -2,24 | -4,71  | 0,00013 | ---             | CDRT1        |  |
| 8012949 | -2,02 | -4,07 | 0,00780 | -1,73 | -3,32  | 0,01313 | NM_006382       | PPP1R3F      |  |
| 8167476 | -2,03 | -4,07 | 0,02859 | -1,32 | -2,49  | 0,02011 | NM_033215       | PPP1R1A      |  |
| 7963826 | -2,03 | -4,07 | 0,02015 | -1,59 | -3,02  | 0,00134 | NM_006741       | B3GALT4      |  |
| 8118655 | -2,03 | -4,07 | 0,00785 | -1,07 | -2,10  | 0,00013 | NM_003782       | B3GALT4      |  |
| 8178264 | -2,03 | -4,07 | 0,00785 | -1,07 | -2,10  | 0,00013 | NM_003782       | B3GALT4      |  |
| 8179555 | -2,03 | -4,07 | 0,00785 | -1,07 | -2,10  | 0,00013 | NM_003782       | C16orf11     |  |
| 7991893 | -2,03 | -4,07 | 0,00945 | -2,32 | -4,98  | 0,00020 | BC016613        | APOC3        |  |
| 8077204 | -2,03 | -4,08 | 0,01546 | -2,04 | -4,12  | 0,00472 | NM_000040       | ---          |  |
| 8040488 | -2,03 | -4,08 | 0,05704 | -1,74 | -3,34  | 0,01362 | ---             | ---          |  |
| 7912194 | -2,03 | -4,08 | 0,00289 | -0,82 | -1,76  | 0,01940 | ---             | PCP2         |  |
| 8033414 | -2,03 | -4,08 | 0,00481 | -2,09 | -4,27  | 0,01261 | NM_174895       | ---          |  |
| 8111151 | -2,03 | -4,08 | 0,03501 | -2,85 | -7,20  | 0,00406 | ---             | COL9A3       |  |
| 8063970 | -2,03 | -4,08 | 0,02420 | -2,80 | -6,95  | 0,00005 | NM_001853       | ---          |  |
| 7995306 | -2,03 | -4,08 | 0,06994 | -4,40 | -21,05 | 0,00019 | ---             | LOC401357    |  |
| 8139769 | -2,03 | -4,09 | 0,03283 | -2,04 | -4,12  | 0,00203 | AK125790        | RNU12        |  |
| 8073603 | -2,03 | -4,09 | 0,01023 | -4,18 | -18,14 | 0,00051 | NR_029422       | ---          |  |
| 7964870 | -2,03 | -4,09 | 0,00409 | -1,21 | -2,31  | 0,00643 | ---             | ---          |  |
| 8046518 | -2,03 | -4,09 | 0,01361 | -3,55 | -11,70 | 0,00320 | ---             | ELANE        |  |
| 8024056 | -2,03 | -4,10 | 0,00855 | -2,42 | -5,36  | 0,00095 | NM_001972       | ---          |  |
| 7961569 | -2,04 | -4,10 | 0,02042 | -1,55 | -2,92  | 0,02357 | ---             | LOC80154     |  |
| 7991714 | -2,04 | -4,10 | 0,00613 | 0,55  | 1,47   | 0,32538 | NR_026811       | SOX18        |  |
| 8067798 | -2,04 | -4,11 | 0,01727 | -1,72 | -3,29  | 0,00145 | NM_018419       | C1QTNF8      |  |
| 7998407 | -2,04 | -4,11 | 0,00041 | -2,09 | -4,25  | 0,00517 | NM_207419       | APOC1        |  |
| 8029536 | -2,04 | -4,11 | 0,00355 | -2,13 | -4,37  | 0,01766 | NM_001645       | ---          |  |
| 8150576 | -2,04 | -4,11 | 0,00101 | -1,77 | -3,41  | 0,00050 | ---             | ---          |  |
| 8167040 | -2,04 | -4,11 | 0,01643 | -2,61 | -6,09  | 0,01061 | ---             | NPW          |  |
| 7992460 | -2,04 | -4,12 | 0,01192 | -1,09 | -2,12  | 0,13232 | NM_001099456    | ---          |  |
| 8113008 | -2,04 | -4,12 | 0,00646 | -2,65 | -6,28  | 0,00060 | ---             | ---          |  |
| 8107109 | -2,04 | -4,12 | 0,00274 | -1,74 | -3,33  | 0,00003 | ---             | MIR320A      |  |
| 8149705 | -2,04 | -4,12 | 0,00931 | -2,95 | -7,73  | 0,00011 | NR_029714       | GPR20        |  |
| 8153269 | -2,04 | -4,12 | 0,01442 | -1,69 | -3,22  | 0,00168 | NM_005293       | GRAPL        |  |
| 8005555 | -2,04 | -4,13 | 0,00568 | -1,68 | -3,21  | 0,00585 | BC026233        | GRAPL        |  |
| 8013327 | -2,04 | -4,13 | 0,00568 | -1,68 | -3,21  | 0,00585 | BC026233        | FAM19A5      |  |
| 8073929 | -2,05 | -4,13 | 0,00348 | -1,96 | -3,89  | 0,00193 | NM_015381       | SCT          |  |
| 7945498 | -2,05 | -4,13 | 0,00210 | -2,05 | -4,13  | 0,00027 | NM_021920       | MIR365-1     |  |
| 7993337 | -2,05 | -4,13 | 0,03784 | -2,11 | -4,32  | 0,01517 | NR_029854       | CBX8         |  |
| 8019010 | -2,05 | -4,13 | 0,00191 | -1,79 | -3,46  | 0,00100 | NM_020649       | FLJ42875     |  |
| 7911793 | -2,05 | -4,13 | 0,01287 | -2,05 | -4,13  | 0,15914 | NR_015440       | MIR212       |  |
| 8011220 | -2,05 | -4,14 | 0,02436 | -2,74 | -6,68  | 0,00052 | NR_029625       | PRKCG        |  |
| 8031057 | -2,05 | -4,14 | 0,00116 | -0,66 | -1,58  | 0,22554 | NM_002739       | FGFBP1       |  |
| 8099467 | -2,05 | -4,14 | 0,00024 | -0,23 | -1,17  | 0,51785 | NM_005130       | ---          |  |
| 7995627 | -2,05 | -4,14 | 0,00163 | -2,87 | -7,32  | 0,00144 | ---             | GRRP1        |  |
| 7899093 | -2,05 | -4,14 | 0,00240 | -1,91 | -3,75  | 0,01201 | NM_024869       | MIR425       |  |
| 8087250 | -2,05 | -4,14 | 0,01624 | -2,50 | -5,64  | 0,00219 | NR_029948       | ---          |  |
| 8128308 | -2,05 | -4,14 | 0,01247 | -3,48 | -11,16 | 0,00189 | ---             | ---          |  |
| 7984799 | -2,05 | -4,14 | 0,00944 | -1,18 | -2,27  | 0,05138 | ---             | ---          |  |
| 8066025 | -2,05 | -4,14 | 0,01867 | -3,48 | -11,18 | 0,00019 | ---             | ---          |  |
| 8085770 | -2,05 | -4,15 | 0,01597 | -1,69 | -3,24  | 0,00364 | ---             | ---          |  |
| 8168685 | -2,05 | -4,15 | 0,01272 | -1,42 | -2,68  | 0,06009 | ---             | IGFALS       |  |
| 7998601 | -2,05 | -4,15 | 0,05387 | -2,53 | -5,77  | 0,00110 | NM_001146006    | ---          |  |
| 7926659 | -2,05 | -4,15 | 0,00080 | -1,78 | -3,44  | 0,05916 | ---             | ---          |  |
| 7904463 | -2,06 | -4,16 | 0,00128 | 0,62  | 1,54   | 0,22981 | ---             | TSPYL3       |  |
| 8065603 | -2,06 | -4,16 | 0,03062 | -1,81 | -3,50  | 0,00055 | NR_002781       | ---          |  |
| 8143986 | -2,06 | -4,16 | 0,00478 | -1,71 | -3,28  | 0,04531 | ---             | ---          |  |
| 8055085 | -2,06 | -4,16 | 0,02013 | -2,59 | -6,03  | 0,00310 | ---             | MGC45922     |  |
| 8030749 | -2,06 | -4,16 | 0,00367 | -0,80 | -1,74  | 0,08546 | ENST00000326989 | KRTAP10-10   |  |
| 8069153 | -2,06 | -4,16 | 0,03548 | -2,72 | -6,57  | 0,00013 | NM_181688       | SLC25A5      |  |
| 8174675 | -2,06 | -4,16 | 0,00301 | -0,98 | -1,97  | 0,08376 | NM_001152       | LOC340096    |  |
| 8111212 | -2,06 | -4,17 | 0,00215 | -1,90 | -3,74  | 0,04759 | ENST00000453298 | SPRED3       |  |
| 8028389 | -2,06 | -4,17 | 0,00330 | -2,09 | -4,26  | 0,00099 | NM_001042522    | ---          |  |
| 8096897 | -2,06 | -4,18 | 0,01099 | -1,48 | -2,78  | 0,02460 | ---             | MAPK15       |  |
| 8148674 | -2,06 | -4,18 | 0,02393 | -1,01 | -2,01  | 0,00913 | NM_139021       | ---          |  |
| 8045972 | -2,06 | -4,18 | 0,00027 | -1,50 | -2,83  | 0,00057 | ---             | CCDC88C      |  |
| 7980773 | -2,06 | -4,18 | 0,01004 | -0,44 | -1,35  | 0,47640 | NM_001080414    | ---          |  |
| 7903970 | -2,07 | -4,19 | 0,00756 | -2,73 | -6,64  | 0,00052 | ---             | TXNDC11      |  |
| 7993265 | -2,07 | -4,19 | 0,00293 | -2,23 | -4,68  | 0,01157 | NM_015914       | LMX1B        |  |
| 8157922 | -2,07 | -4,20 | 0,00282 | -1,14 | -2,20  | 0,11913 | NM_002316       | BLOC1S3      |  |
| 8029640 | -2,07 | -4,20 | 0,01082 | -1,71 | -3,26  | 0,08998 | NM_212550       | FOXQ1        |  |
| 8116579 | -2,07 | -4,20 | 0,00024 | -2,64 | -6,23  | 0,00025 | NM_033260       | LOC100130916 |  |
| 8162664 | -2,07 | -4,20 | 0,00503 | -2,24 | -4,71  | 0,00136 | AY358791        | ---          |  |
| 7972711 | -2,07 | -4,20 | 0,03142 | -2,50 | -5,68  | 0,05520 | ---             | CLDN23       |  |

|         |       |       |         |       |        |         |                 |           |
|---------|-------|-------|---------|-------|--------|---------|-----------------|-----------|
| 8144505 | -2,07 | -4,20 | 0,01222 | -1,90 | -3,74  | 0,00323 | NM_194284       | ---       |
| 7971690 | -2,07 | -4,21 | 0,00318 | -1,50 | -2,83  | 0,00544 | ---             | ---       |
| 7972977 | -2,07 | -4,21 | 0,04087 | -2,90 | -7,47  | 0,01279 | ---             | ---       |
| 8147992 | -2,07 | -4,21 | 0,00983 | -2,55 | -5,85  | 0,00667 | ---             | C17orf88  |
| 8007548 | -2,08 | -4,21 | 0,01188 | -1,49 | -2,82  | 0,02689 | NR_026770       | ---       |
| 7991501 | -2,08 | -4,21 | 0,00912 | -2,58 | -5,99  | 0,03181 | ---             | HES3      |
| 7897280 | -2,08 | -4,22 | 0,00783 | -1,93 | -3,80  | 0,01018 | NM_001024598    | ---       |
| 7991661 | -2,08 | -4,22 | 0,00833 | -2,01 | -4,02  | 0,00039 | ---             | TMEM200B  |
| 7914232 | -2,08 | -4,22 | 0,00109 | -2,59 | -6,03  | 0,00063 | NM_001003682    | ---       |
| 7912162 | -2,08 | -4,22 | 0,00945 | -2,75 | -6,73  | 0,00018 | ---             | ---       |
| 7911176 | -2,08 | -4,22 | 0,00107 | -1,55 | -2,93  | 0,00052 | ---             | NPFFR1    |
| 7934141 | -2,08 | -4,22 | 0,02705 | -2,40 | -5,26  | 0,00029 | NM_022146       | ---       |
| 8105063 | -2,08 | -4,23 | 0,01833 | -1,95 | -3,86  | 0,00045 | ---             | ---       |
| 7940580 | -2,08 | -4,23 | 0,01009 | -3,12 | -8,72  | 0,00148 | ---             | MGC23284  |
| 7997808 | -2,08 | -4,23 | 0,05089 | -1,64 | -3,11  | 0,11050 | NR_024399       | EFCAB2    |
| 7925585 | -2,08 | -4,23 | 0,02774 | -1,22 | -2,33  | 0,01180 | NM_032328       | MAPK8IP2  |
| 8074108 | -2,08 | -4,23 | 0,00425 | -1,66 | -3,15  | 0,00369 | NM_012324       | EMID1     |
| 8072189 | -2,08 | -4,24 | 0,00541 | -0,64 | -1,56  | 0,21119 | NM_133455       | PLEKHN1   |
| 7896798 | -2,08 | -4,24 | 0,00228 | -1,99 | -3,97  | 0,00033 | NM_032129       | ---       |
| 7984620 | -2,08 | -4,24 | 0,11643 | -4,14 | -17,69 | 0,02449 | ---             | ---       |
| 8002262 | -2,09 | -4,24 | 0,01594 | -3,53 | -11,56 | 0,00083 | ---             | ---       |
| 8171193 | -2,09 | -4,24 | 0,00094 | -1,61 | -3,05  | 0,00355 | ---             | ZNF840P   |
| 8063171 | -2,09 | -4,24 | 0,08066 | -1,04 | -2,05  | 0,10561 | ENST00000442886 | LHFPL4    |
| 8085195 | -2,09 | -4,25 | 0,00024 | -1,31 | -2,48  | 0,03726 | NM_198560       | ---       |
| 8061404 | -2,09 | -4,25 | 0,00180 | -1,63 | -3,09  | 0,04443 | ---             | ---       |
| 8038200 | -2,09 | -4,25 | 0,01954 | -2,32 | -5,01  | 0,00013 | ---             | FGFR3     |
| 8093518 | -2,09 | -4,25 | 0,01337 | -1,20 | -2,30  | 0,03741 | NM_000142       | DUX4      |
| 8098732 | -2,09 | -4,25 | 0,13653 | -4,67 | -25,44 | 0,00005 | NM_033178       | PDZK1IP1  |
| 7915910 | -2,09 | -4,26 | 0,00136 | -1,22 | -2,33  | 0,00004 | NM_005764       | ---       |
| 7917902 | -2,09 | -4,26 | 0,00714 | -2,84 | -7,18  | 0,01458 | ---             | ---       |
| 8113879 | -2,09 | -4,26 | 0,08464 | -3,38 | -10,40 | 0,00047 | ---             | ---       |
| 8107406 | -2,09 | -4,26 | 0,01563 | -2,37 | -5,17  | 0,00068 | ---             | C15orf2   |
| 7981917 | -2,09 | -4,26 | 0,00708 | -2,24 | -4,71  | 0,00608 | NM_018958       | LOC400940 |
| 8040077 | -2,09 | -4,26 | 0,00016 | -1,78 | -3,44  | 0,00002 | NR_026833       | ---       |
| 8102984 | -2,09 | -4,26 | 0,01137 | -1,12 | -2,18  | 0,12201 | ---             | ---       |
| 8132692 | -2,09 | -4,26 | 0,00297 | -1,73 | -3,33  | 0,01676 | ---             | HSPA6     |
| 7906764 | -2,09 | -4,26 | 0,00900 | -0,86 | -1,81  | 0,18409 | NM_002155       | ---       |
| 8065240 | -2,09 | -4,26 | 0,00370 | -1,34 | -2,53  | 0,07524 | ---             | ---       |
| 8161938 | -2,09 | -4,27 | 0,00217 | -1,88 | -3,67  | 0,00031 | ---             | ---       |
| 8117284 | -2,09 | -4,27 | 0,00834 | -2,76 | -6,76  | 0,00037 | ---             | ---       |
| 8016086 | -2,09 | -4,27 | 0,01487 | -2,79 | -6,92  | 0,00322 | ---             | NKX6-3    |
| 8150433 | -2,10 | -4,28 | 0,00836 | -1,72 | -3,30  | 0,00269 | NM_152568       | DUX4      |
| 8098725 | -2,10 | -4,28 | 0,14535 | -4,84 | -28,69 | 0,00002 | NM_033178       | LIME1     |
| 8064168 | -2,10 | -4,28 | 0,02729 | -3,06 | -8,35  | 0,00288 | NM_017806       | ---       |
| 7902911 | -2,10 | -4,29 | 0,00168 | -2,91 | -7,53  | 0,00000 | ---             | ---       |
| 7990652 | -2,10 | -4,29 | 0,01561 | -3,47 | -11,06 | 0,00110 | ---             | UCA1      |
| 8026490 | -2,10 | -4,29 | 0,00203 | -1,60 | -3,02  | 0,00054 | NR_015379       | PCSK1N    |
| 8172447 | -2,10 | -4,29 | 0,00334 | -1,68 | -3,20  | 0,01103 | NM_013271       | LILRA1    |
| 8031213 | -2,10 | -4,30 | 0,03488 | -1,46 | -2,76  | 0,00473 | NM_006863       | ---       |
| 7929952 | -2,10 | -4,30 | 0,00807 | -2,72 | -6,57  | 0,01122 | ---             | ---       |
| 8120876 | -2,10 | -4,30 | 0,00034 | -0,87 | -1,83  | 0,03763 | ---             | ---       |
| 8104447 | -2,11 | -4,30 | 0,03859 | -2,42 | -5,37  | 0,00102 | ---             | SCGB1C1   |
| 8019711 | -2,11 | -4,30 | 0,00941 | -0,97 | -1,96  | 0,05759 | NM_145651       | ---       |
| 8091101 | -2,11 | -4,31 | 0,13393 | -2,66 | -6,32  | 0,01113 | ---             | ---       |
| 8000897 | -2,11 | -4,31 | 0,08958 | -4,53 | -23,14 | 0,00111 | ---             | C19orf68  |
| 8029996 | -2,11 | -4,31 | 0,00247 | -0,51 | -1,42  | 0,08397 | BC043386        | ---       |
| 8053480 | -2,11 | -4,31 | 0,01655 | -3,82 | -14,15 | 0,00001 | ---             | ---       |
| 8061073 | -2,11 | -4,31 | 0,00523 | -1,84 | -3,59  | 0,00112 | ---             | ---       |
| 7934896 | -2,11 | -4,31 | 0,14310 | -3,56 | -11,81 | 0,00039 | ---             | ---       |
| 7958423 | -2,11 | -4,31 | 0,00213 | -2,45 | -5,46  | 0,00218 | ---             | CTU1      |
| 8038782 | -2,11 | -4,32 | 0,00370 | -2,11 | -4,32  | 0,07160 | NM_145232       | DUX4      |
| 8098740 | -2,11 | -4,32 | 0,13023 | -4,64 | -24,98 | 0,00009 | NM_033178       | KRT17     |
| 8015387 | -2,11 | -4,33 | 0,00876 | -2,06 | -4,16  | 0,02567 | NM_000422       | VPS37D    |
| 8133339 | -2,11 | -4,33 | 0,03552 | -2,20 | -4,59  | 0,02729 | NM_001077621    | C19orf77  |
| 8032588 | -2,12 | -4,33 | 0,03042 | -0,53 | -1,44  | 0,18798 | NM_001136503    | SNORA57   |
| 7940667 | -2,12 | -4,34 | 0,01648 | -1,84 | -3,58  | 0,00032 | NR_004390       | ---       |
| 8137435 | -2,12 | -4,34 | 0,00034 | -1,64 | -3,11  | 0,00134 | ---             | INSM2     |
| 7973943 | -2,12 | -4,34 | 0,00770 | -2,60 | -6,08  | 0,01370 | NM_032594       | ---       |
| 7907394 | -2,12 | -4,34 | 0,00431 | -2,46 | -5,51  | 0,00064 | ---             | ---       |
| 8096917 | -2,12 | -4,35 | 0,00098 | -2,19 | -4,55  | 0,00796 | ---             | ZNF497    |
| 8039759 | -2,12 | -4,35 | 0,01397 | -1,64 | -3,11  | 0,00413 | NM_198458       | KLK1      |
| 8038633 | -2,12 | -4,35 | 0,01430 | -2,87 | -7,34  | 0,00108 | NM_002257       | FAM101A   |
| 7959761 | -2,12 | -4,36 | 0,00562 | -2,76 | -6,76  | 0,00053 | NM_181709       | SOX7      |

|         |       |       |         |       |        |         |                   |           |
|---------|-------|-------|---------|-------|--------|---------|-------------------|-----------|
| 8149289 | -2,12 | -4,36 | 0,02693 | -2,01 | -4,04  | 0,03471 | NM_031439         | ---       |
| 7905927 | -2,13 | -4,37 | 0,00538 | -2,02 | -4,05  | 0,02167 | ---               | ---       |
| 8040290 | -2,13 | -4,37 | 0,00263 | -1,93 | -3,82  | 0,00461 | ---               | SIX5      |
| 8037651 | -2,13 | -4,38 | 0,00306 | -1,48 | -2,79  | 0,00761 | NM_175875         | TMEM89    |
| 8087116 | -2,13 | -4,38 | 0,01566 | -2,11 | -4,31  | 0,03208 | NM_001008269      | OTX1      |
| 8042251 | -2,13 | -4,38 | 0,00427 | -0,30 | -1,23  | 0,41870 | NM_014562         | ---       |
| 8036300 | -2,13 | -4,38 | 0,00135 | -2,08 | -4,23  | 0,00441 | ---               | ---       |
| 7967620 | -2,13 | -4,38 | 0,00721 | -2,72 | -6,58  | 0,02632 | ---               | ---       |
| 8066382 | -2,13 | -4,38 | 0,04056 | -1,18 | -2,27  | 0,07061 | ---               | ---       |
| 7973054 | -2,13 | -4,38 | 0,17396 | -4,40 | -21,17 | 0,00002 | ---               | CAMK2N2   |
| 8092468 | -2,13 | -4,39 | 0,02154 | -2,56 | -5,89  | 0,00124 | NM_033259         | OR4D2     |
| 8008718 | -2,13 | -4,39 | 0,00996 | -1,01 | -2,02  | 0,02521 | NM_001004707      | ---       |
| 8155212 | -2,13 | -4,39 | 0,00274 | -1,69 | -3,24  | 0,03054 | ---               | ---       |
| 7980140 | -2,13 | -4,39 | 0,01965 | -0,80 | -1,74  | 0,39553 | ---               | YBX2      |
| 8012140 | -2,14 | -4,39 | 0,00670 | -0,46 | -1,38  | 0,11984 | NM_015982         | ---       |
| 8143708 | -2,14 | -4,40 | 0,01663 | -2,26 | -4,80  | 0,01791 | ---               | C2orf7    |
| 8053004 | -2,14 | -4,40 | 0,05382 | -2,52 | -5,74  | 0,00136 | NM_032319         | MARCKSL1  |
| 7914525 | -2,14 | -4,41 | 0,00962 | -2,02 | -4,06  | 0,00238 | NM_023009         | CGB2      |
| 8030181 | -2,14 | -4,41 | 0,01360 | -2,01 | -4,04  | 0,00326 | NM_033378         | ---       |
| 7915200 | -2,14 | -4,41 | 0,00460 | -2,67 | -6,35  | 0,00024 | ---               | ---       |
| 7957568 | -2,14 | -4,42 | 0,00198 | -2,61 | -6,12  | 0,00140 | ---               | ---       |
| 8027414 | -2,14 | -4,42 | 0,00743 | -1,37 | -2,58  | 0,01647 | ---               | ---       |
| 7926805 | -2,14 | -4,42 | 0,00014 | -0,64 | -1,56  | 0,00909 | ---               | ---       |
| 8128712 | -2,14 | -4,42 | 0,00955 | -3,30 | -9,88  | 0,00139 | ---               | C11orf95  |
| 7949015 | -2,14 | -4,42 | 0,04143 | -1,95 | -3,86  | 0,00035 | NM_001144936      | ---       |
| 7951131 | -2,15 | -4,42 | 0,09367 | -1,36 | -2,56  | 0,07310 | ---               | PITX3     |
| 7935983 | -2,15 | -4,43 | 0,02264 | -2,26 | -4,80  | 0,00007 | NM_005029         | SELV      |
| 8028730 | -2,15 | -4,43 | 0,02913 | -1,70 | -3,24  | 0,01682 | NM_182704         | ---       |
| 7922910 | -2,15 | -4,43 | 0,01109 | -1,57 | -2,98  | 0,00035 | ---               | ---       |
| 8168434 | -2,15 | -4,44 | 0,01050 | -1,39 | -2,63  | 0,00513 | ---               | ---       |
| 8051273 | -2,15 | -4,44 | 0,00394 | -2,66 | -6,33  | 0,00011 | ---               | MGAT3     |
| 8073129 | -2,15 | -4,45 | 0,01181 | -1,17 | -2,25  | 0,02081 | NM_002409         | ---       |
| 8128892 | -2,15 | -4,45 | 0,00259 | -1,80 | -3,48  | 0,00400 | ---               | FBRSL1    |
| 7960088 | -2,15 | -4,45 | 0,01508 | -0,65 | -1,56  | 0,20965 | NM_001142641      | MIR34A    |
| 7912250 | -2,15 | -4,45 | 0,01743 | -1,43 | -2,70  | 0,00396 | EF592573 FLJ45825 |           |
| 8119223 | -2,15 | -4,45 | 0,07106 | -1,36 | -2,56  | 0,11585 | AK127725          | ---       |
| 8055424 | -2,16 | -4,46 | 0,00056 | -2,42 | -5,35  | 0,00280 | ---               | POMC      |
| 8050805 | -2,16 | -4,46 | 0,00708 | -2,01 | -4,04  | 0,00061 | NM_001035256      | KCNJ12    |
| 8005726 | -2,16 | -4,47 | 0,00522 | -1,56 | -2,95  | 0,01878 | NM_021012         | LOC440944 |
| 8085193 | -2,16 | -4,47 | 0,06131 | -1,86 | -3,62  | 0,04176 | AK128398          | ---       |
| 8099362 | -2,16 | -4,47 | 0,00269 | -2,39 | -5,24  | 0,00989 | ---               | ---       |
| 7977801 | -2,16 | -4,47 | 0,02538 | -2,23 | -4,70  | 0,00156 | ---               | PRR18     |
| 8130715 | -2,16 | -4,47 | 0,00540 | -1,93 | -3,81  | 0,00273 | NM_175922         | AOC3      |
| 8007427 | -2,16 | -4,47 | 0,04692 | -3,63 | -12,40 | 0,00114 | NM_003734         | ---       |
| 7976667 | -2,16 | -4,48 | 0,02672 | -1,52 | -2,86  | 0,00315 | ---               | ---       |
| 7986820 | -2,16 | -4,48 | 0,01038 | -1,84 | -3,59  | 0,01501 | ---               | NTF4      |
| 8038305 | -2,17 | -4,49 | 0,00969 | -1,87 | -3,64  | 0,00279 | NM_006179         | CXCL3     |
| 8100984 | -2,17 | -4,49 | 0,01588 | -2,60 | -6,06  | 0,00001 | NM_002090         | CA11      |
| 8038126 | -2,17 | -4,49 | 0,00856 | -0,55 | -1,46  | 0,44547 | NM_001217         | TNFRSF4   |
| 7911413 | -2,17 | -4,49 | 0,00648 | -1,63 | -3,10  | 0,00137 | NM_003327         | NKX6-1    |
| 8101507 | -2,17 | -4,50 | 0,01008 | -1,80 | -3,49  | 0,00926 | NM_006168         | ---       |
| 8131581 | -2,17 | -4,50 | 0,04111 | -1,91 | -3,75  | 0,03536 | ---               | ACTRT2    |
| 7897128 | -2,17 | -4,50 | 0,00029 | -2,13 | -4,37  | 0,00063 | NM_080431         | ---       |
| 7935859 | -2,17 | -4,50 | 0,10303 | -2,45 | -5,45  | 0,00229 | ---               | ---       |
| 8124846 | -2,17 | -4,50 | 0,03860 | -2,47 | -5,55  | 0,00008 | ---               | ---       |
| 8093330 | -2,17 | -4,50 | 0,00576 | -1,74 | -3,35  | 0,01161 | ---               | HOXC12    |
| 7955852 | -2,17 | -4,51 | 0,00120 | -1,88 | -3,68  | 0,00796 | NM_173860         | LOC643797 |
| 7986248 | -2,17 | -4,51 | 0,01368 | -3,36 | -10,29 | 0,00004 | AY358245 RFT1     |           |
| 8088090 | -2,17 | -4,51 | 0,01319 | 0,55  | 1,46   | 0,60523 | NM_052859         | C7orf16   |
| 8132182 | -2,18 | -4,52 | 0,00100 | -1,69 | -3,22  | 0,00169 | NM_006658         | BCL7C     |
| 8000948 | -2,18 | -4,52 | 0,00152 | -1,04 | -2,05  | 0,05719 | NM_004765         | C14orf184 |
| 7980859 | -2,18 | -4,52 | 0,00327 | -1,88 | -3,69  | 0,00484 | NM_001080113      | C9orf24   |
| 8160792 | -2,18 | -4,53 | 0,02273 | -2,25 | -4,77  | 0,01997 | NM_032596         | LRRFIP1   |
| 8049538 | -2,18 | -4,53 | 0,03414 | -3,22 | -9,29  | 0,00028 | NM_001137550      | TLX2      |
| 8042896 | -2,18 | -4,53 | 0,00283 | -1,85 | -3,60  | 0,01536 | NM_016170         | ---       |
| 8100001 | -2,18 | -4,54 | 0,00927 | -2,96 | -7,76  | 0,00049 | ---               | ---       |
| 8149256 | -2,18 | -4,54 | 0,01039 | -3,44 | -10,82 | 0,00001 | ---               | ---       |
| 8053057 | -2,18 | -4,55 | 0,03695 | -1,60 | -3,04  | 0,07171 | ---               | GPR61     |
| 7903694 | -2,19 | -4,55 | 0,01545 | -1,81 | -3,49  | 0,00799 | NM_031936         | ---       |
| 8010785 | -2,19 | -4,55 | 0,02083 | -2,67 | -6,34  | 0,00016 | ---               | FLJ25715  |
| 8023910 | -2,19 | -4,55 | 0,07596 | -1,19 | -2,29  | 0,00194 | AK098581 MFSD2B   |           |
| 8040522 | -2,19 | -4,55 | 0,04336 | -1,55 | -2,92  | 0,04428 | NM_001080473      | SCARNA17  |
| 8021181 | -2,19 | -4,56 | 0,00020 | -1,50 | -2,83  | 0,01294 | NR_003003         | ZCCHC2    |

|         |       |       |         |       |         |         |                 |           |
|---------|-------|-------|---------|-------|---------|---------|-----------------|-----------|
| 8021542 | -2,19 | -4,57 | 0,01829 | -1,54 | -2,90   | 0,03247 | NM_017742       | ---       |
| 8066345 | -2,19 | -4,57 | 0,00181 | -2,02 | -4,05   | 0,00129 | ---             | ---       |
| 8051987 | -2,19 | -4,57 | 0,00258 | -1,61 | -3,05   | 0,01669 | ---             | ---       |
| 7983252 | -2,19 | -4,57 | 0,00817 | -2,33 | -5,02   | 0,00725 | ---             | FAM53A    |
| 8098895 | -2,20 | -4,58 | 0,00700 | -1,94 | -3,83   | 0,00126 | NM_001013622    | ---       |
| 8157939 | -2,20 | -4,59 | 0,07803 | -1,92 | -3,79   | 0,02088 | ---             | C1orf113  |
| 7914898 | -2,20 | -4,60 | 0,00537 | -2,19 | -4,56   | 0,00062 | ENST00000312808 | ---       |
| 8161476 | -2,20 | -4,60 | 0,05335 | -4,41 | -21,26  | 0,00007 | ---             | ---       |
| 7906993 | -2,20 | -4,60 | 0,00568 | -2,84 | -7,14   | 0,00941 | ---             | ---       |
| 8018791 | -2,20 | -4,60 | 0,02527 | -3,22 | -9,29   | 0,00104 | ---             | ---       |
| 7919969 | -2,20 | -4,60 | 0,00031 | -2,42 | -5,36   | 0,03842 | ---             | SRMS      |
| 8067671 | -2,20 | -4,60 | 0,01782 | -1,47 | -2,78   | 0,00216 | NM_080823       | PNMA6A    |
| 8175768 | -2,20 | -4,61 | 0,01061 | -3,10 | -8,60   | 0,00046 | NM_032882       | ---       |
| 8145568 | -2,21 | -4,61 | 0,01390 | -3,50 | -11,30  | 0,00026 | ---             | GNG13     |
| 7998374 | -2,21 | -4,62 | 0,01370 | -2,49 | -5,63   | 0,00010 | NM_016541       | ---       |
| 7943195 | -2,21 | -4,63 | 0,04048 | -3,41 | -10,62  | 0,00045 | ---             | SYT15     |
| 7933298 | -2,21 | -4,63 | 0,05201 | -1,76 | -3,38   | 0,01944 | NM_031912       | LOC285456 |
| 8102247 | -2,21 | -4,63 | 0,01865 | -1,61 | -3,05   | 0,01226 | NR_026968       | PGAM5     |
| 7960124 | -2,21 | -4,64 | 0,00048 | -0,37 | -1,29   | 0,49116 | NM_138575       | ---       |
| 8165705 | -2,21 | -4,64 | 0,06756 | -7,45 | -174,69 | 0,00001 | ---             | C16orf79  |
| 7998749 | -2,22 | -4,65 | 0,01621 | -2,86 | -7,26   | 0,01107 | NM_182563       | FLJ42875  |
| 7911796 | -2,22 | -4,65 | 0,00949 | -2,71 | -6,53   | 0,00040 | NR_024371       | ---       |
| 7963052 | -2,22 | -4,65 | 0,01084 | -3,44 | -10,86  | 0,00056 | ---             | ---       |
| 7914178 | -2,22 | -4,65 | 0,00831 | -2,56 | -5,91   | 0,00228 | ---             | ---       |
| 8151238 | -2,22 | -4,67 | 0,01361 | -2,26 | -4,80   | 0,04283 | ---             | RPL13     |
| 7997933 | -2,22 | -4,67 | 0,00716 | -1,40 | -2,64   | 0,23564 | NM_033251       | ---       |
| 8134550 | -2,23 | -4,68 | 0,00634 | -3,47 | -11,08  | 0,00022 | ---             | HMX3      |
| 7931181 | -2,23 | -4,68 | 0,00244 | -3,30 | -9,82   | 0,00036 | NM_001105574    | SLC2A6    |
| 8164918 | -2,23 | -4,68 | 0,00215 | -1,99 | -3,98   | 0,01826 | NM_017585       | PRDM12    |
| 8158708 | -2,23 | -4,68 | 0,01372 | -2,16 | -4,48   | 0,00059 | NM_021619       | ---       |
| 8022870 | -2,23 | -4,68 | 0,03454 | -3,14 | -8,79   | 0,00014 | ---             | LOC151174 |
| 8059985 | -2,23 | -4,68 | 0,00629 | -2,84 | -7,16   | 0,00240 | NR_026925       | PRR22     |
| 8033023 | -2,23 | -4,69 | 0,00642 | -3,26 | -9,60   | 0,00006 | NM_001134316    | RPS2P32   |
| 8131869 | -2,23 | -4,69 | 0,00730 | -1,60 | -3,03   | 0,09863 | NR_026676       | PDX1      |
| 7968265 | -2,23 | -4,69 | 0,01117 | -1,93 | -3,80   | 0,01021 | NM_000209       | C6orf26   |
| 8118302 | -2,23 | -4,69 | 0,00324 | -1,88 | -3,68   | 0,00807 | NM_001039651    | FAM57B    |
| 7994730 | -2,23 | -4,70 | 0,01197 | -1,68 | -3,21   | 0,00649 | NM_031478       | LMTK3     |
| 8038093 | -2,23 | -4,70 | 0,00949 | -1,92 | -3,79   | 0,01202 | NM_001080434    | FKRP      |
| 8029847 | -2,23 | -4,71 | 0,02173 | -2,98 | -7,91   | 0,00167 | NM_001039885    | C1orf68   |
| 7905512 | -2,24 | -4,71 | 0,05048 | -3,34 | -10,09  | 0,00031 | NM_001024679    | ZBTB42    |
| 7977294 | -2,24 | -4,71 | 0,00904 | -0,86 | -1,81   | 0,08047 | NM_001137601    | ACR       |
| 8054766 | -2,24 | -4,72 | 0,01679 | -1,48 | -2,79   | 0,00329 | NM_001097       | ---       |
| 8041540 | -2,24 | -4,72 | 0,00427 | -2,19 | -4,56   | 0,00206 | ---             | C6orf26   |
| 8178080 | -2,24 | -4,72 | 0,00563 | -1,83 | -3,55   | 0,01995 | NM_001039651    | KRTAP6-1  |
| 8069852 | -2,24 | -4,72 | 0,01183 | -2,63 | -6,21   | 0,00093 | NM_181602       | GJA4      |
| 7899939 | -2,24 | -4,72 | 0,00628 | -3,01 | -8,06   | 0,00011 | NM_002060       | ---       |
| 7976158 | -2,24 | -4,72 | 0,00376 | -1,54 | -2,90   | 0,14648 | ---             | ---       |
| 8115064 | -2,24 | -4,73 | 0,00172 | -1,88 | -3,69   | 0,00378 | ---             | FAM90A7   |
| 8149383 | -2,24 | -4,73 | 0,08928 | -3,04 | -8,20   | 0,00350 | NM_001136572    | DLK1      |
| 7976783 | -2,24 | -4,74 | 0,00707 | -1,57 | -2,96   | 0,00040 | NM_003836       | ---       |
| 7901967 | -2,24 | -4,74 | 0,00869 | -2,07 | -4,21   | 0,01146 | ---             | ---       |
| 7971511 | -2,25 | -4,74 | 0,05081 | -3,47 | -11,09  | 0,00097 | ---             | POM121L9P |
| 8071877 | -2,25 | -4,74 | 0,00727 | -2,58 | -5,98   | 0,00256 | NR_003714       | MIRLET7F2 |
| 8173007 | -2,25 | -4,75 | 0,01547 | -2,23 | -4,71   | 0,00719 | NR_029484       | KRTAP10-9 |
| 8069150 | -2,25 | -4,75 | 0,07386 | -2,56 | -5,90   | 0,00502 | NM_198690       | ---       |
| 8144717 | -2,25 | -4,76 | 0,12523 | -3,45 | -10,95  | 0,00182 | ---             | ---       |
| 7926817 | -2,25 | -4,76 | 0,00431 | -2,93 | -7,59   | 0,00002 | ---             | ---       |
| 8022606 | -2,25 | -4,77 | 0,05784 | -3,83 | -14,21  | 0,00080 | ---             | C19orf20  |
| 8023948 | -2,25 | -4,77 | 0,00257 | -2,16 | -4,48   | 0,01807 | NM_033513       | ---       |
| 7927645 | -2,25 | -4,77 | 0,02781 | -2,81 | -7,03   | 0,00595 | ---             | ---       |
| 8163013 | -2,26 | -4,79 | 0,04185 | -2,98 | -7,91   | 0,00036 | ---             | ---       |
| 8061666 | -2,26 | -4,79 | 0,00538 | -2,51 | -5,71   | 0,00150 | ---             | ---       |
| 8074878 | -2,26 | -4,80 | 0,04510 | -2,02 | -4,05   | 0,00043 | ---             | ---       |
| 7931681 | -2,26 | -4,80 | 0,00401 | -1,77 | -3,42   | 0,12914 | ---             | ---       |
| 7972442 | -2,27 | -4,81 | 0,00367 | -1,67 | -3,17   | 0,00674 | ---             | ---       |
| 8078832 | -2,27 | -4,81 | 0,00240 | -1,91 | -3,75   | 0,00365 | ---             | C9orf141  |
| 8159519 | -2,27 | -4,81 | 0,00416 | -2,13 | -4,39   | 0,04683 | ENST00000371629 | C20orf144 |
| 8061940 | -2,27 | -4,81 | 0,02255 | -2,89 | -7,40   | 0,00371 | DQ080434        | ---       |
| 8064831 | -2,27 | -4,82 | 0,00703 | -2,69 | -6,46   | 0,00045 | ---             | ---       |
| 8092390 | -2,27 | -4,82 | 0,01755 | -2,97 | -7,86   | 0,00068 | ---             | LCA10     |
| 8170786 | -2,27 | -4,84 | 0,02531 | -2,23 | -4,68   | 0,00775 | AF514420        | OR52L2P   |
| 7946121 | -2,28 | -4,84 | 0,00215 | -1,89 | -3,70   | 0,00693 | ENST00000316540 | FAM90A7   |
| 8149361 | -2,28 | -4,84 | 0,07621 | -2,82 | -7,07   | 0,00431 | NM_001136572    | SNORA71C  |

|         |       |       |         |       |        |         |                 |              |
|---------|-------|-------|---------|-------|--------|---------|-----------------|--------------|
| 8066260 | -2,28 | -4,85 | 0,00384 | -2,30 | -4,92  | 0,00527 | NR_003017       | FAM184B      |
| 8099551 | -2,28 | -4,85 | 0,00272 | -2,06 | -4,16  | 0,00289 | NM_015688       | ---          |
| 8145822 | -2,28 | -4,86 | 0,00198 | -1,90 | -3,73  | 0,00255 | ---             | YIF1B        |
| 8036479 | -2,28 | -4,86 | 0,00535 | -1,97 | -3,91  | 0,00200 | NM_033557       | UCN          |
| 8051061 | -2,28 | -4,87 | 0,01793 | -1,44 | -2,72  | 0,04418 | NM_003353       | ---          |
| 7905127 | -2,28 | -4,87 | 0,00261 | -1,69 | -3,23  | 0,00731 | ---             | SNORA10      |
| 7998664 | -2,28 | -4,87 | 0,03366 | -3,47 | -11,07 | 0,00004 | NR_002327       | SNORA10      |
| 8041204 | -2,28 | -4,87 | 0,03366 | -3,47 | -11,07 | 0,00004 | NR_002327       | ---          |
| 8074330 | -2,29 | -4,88 | 0,02004 | -3,58 | -11,96 | 0,00645 | ---             | ---          |
| 7982100 | -2,29 | -4,88 | 0,02885 | -4,02 | -16,25 | 0,00066 | ---             | HBQ1         |
| 7991772 | -2,29 | -4,89 | 0,03295 | -3,09 | -8,51  | 0,00049 | NM_005331       | ---          |
| 8134405 | -2,29 | -4,90 | 0,00022 | -1,79 | -3,47  | 0,00164 | ---             | ---          |
| 7989617 | -2,29 | -4,90 | 0,04018 | -2,98 | -7,89  | 0,00038 | ---             | ---          |
| 8101810 | -2,30 | -4,92 | 0,01264 | -2,47 | -5,53  | 0,00129 | ---             | MYO15B       |
| 8009873 | -2,30 | -4,93 | 0,00176 | -2,11 | -4,31  | 0,00033 | NR_003587       | ---          |
| 7943411 | -2,30 | -4,93 | 0,00549 | -2,97 | -7,82  | 0,00045 | ---             | ---          |
| 8089247 | -2,30 | -4,94 | 0,11405 | -1,95 | -3,87  | 0,09855 | ---             | PRAP1        |
| 7931571 | -2,31 | -4,95 | 0,03930 | -2,91 | -7,54  | 0,00008 | NM_145202       | REEP6        |
| 8024323 | -2,31 | -4,95 | 0,00046 | -0,38 | -1,30  | 0,44346 | NM_138393       | ---          |
| 7942875 | -2,31 | -4,95 | 0,00247 | -3,20 | -9,17  | 0,00405 | ---             | ---          |
| 8069563 | -2,31 | -4,97 | 0,00520 | -2,38 | -5,22  | 0,00045 | ---             | ---          |
| 8023908 | -2,31 | -4,97 | 0,00577 | -2,48 | -5,56  | 0,00006 | ---             | KNCN         |
| 7915841 | -2,31 | -4,97 | 0,02560 | -2,33 | -5,01  | 0,00209 | NM_001097611    | BHLHE23      |
| 8067585 | -2,32 | -4,98 | 0,03388 | -2,24 | -4,72  | 0,01605 | NM_080606       | ---          |
| 8065351 | -2,32 | -4,99 | 0,00390 | -2,51 | -5,70  | 0,00076 | ---             | NCR2         |
| 8119435 | -2,32 | -4,99 | 0,01932 | -2,70 | -6,50  | 0,00532 | NM_004828       | LOC100128364 |
| 8139458 | -2,32 | -5,00 | 0,00716 | -2,95 | -7,74  | 0,01479 | AK096229 KCNJ14 |              |
| 8030044 | -2,32 | -5,00 | 0,00014 | -1,89 | -3,71  | 0,00441 | NM_170720       | PLA2G2F      |
| 7898616 | -2,32 | -5,01 | 0,00074 | -0,88 | -1,84  | 0,01171 | NM_022819       | ---          |
| 8026361 | -2,32 | -5,01 | 0,01064 | -3,17 | -9,00  | 0,00020 | ---             | ---          |
| 8076300 | -2,33 | -5,02 | 0,00079 | -3,27 | -9,67  | 0,00004 | ---             | LOC100129307 |
| 8117176 | -2,33 | -5,03 | 0,00652 | -2,85 | -7,21  | 0,00103 | ENST00000400287 | ---          |
| 8007865 | -2,33 | -5,03 | 0,00203 | -2,28 | -4,87  | 0,00007 | ---             | ---          |
| 8007883 | -2,33 | -5,03 | 0,00203 | -2,28 | -4,87  | 0,00007 | ---             | ---          |
| 8144639 | -2,34 | -5,05 | 0,01054 | -2,03 | -4,08  | 0,00046 | ---             | ---          |
| 7971640 | -2,34 | -5,06 | 0,00032 | -0,98 | -1,98  | 0,03452 | ---             | MIR203       |
| 7977214 | -2,34 | -5,07 | 0,01670 | -2,05 | -4,14  | 0,00555 | NR_029620       | DPCR1        |
| 8118061 | -2,34 | -5,07 | 0,00749 | -1,01 | -2,01  | 0,02375 | NM_080870       | KIAA1543     |
| 8025237 | -2,35 | -5,09 | 0,02205 | -0,71 | -1,64  | 0,04638 | NM_001080429    | ---          |
| 8163147 | -2,35 | -5,09 | 0,00657 | -2,25 | -4,75  | 0,00077 | ---             | ---          |
| 7956417 | -2,35 | -5,09 | 0,00684 | -1,83 | -3,56  | 0,00647 | ---             | ---          |
| 7950370 | -2,35 | -5,09 | 0,01490 | -3,95 | -15,44 | 0,00002 | ---             | ---          |
| 8154365 | -2,35 | -5,10 | 0,02210 | -2,70 | -6,49  | 0,00942 | ---             | ---          |
| 7919151 | -2,35 | -5,11 | 0,15301 | -4,22 | -18,60 | 0,00132 | ---             | ---          |
| 7919392 | -2,35 | -5,11 | 0,15301 | -4,22 | -18,60 | 0,00132 | ---             | C1QL3        |
| 7932308 | -2,36 | -5,12 | 0,01509 | -2,77 | -6,80  | 0,01235 | NM_001010908    | TBX21        |
| 8008029 | -2,36 | -5,12 | 0,00644 | -2,25 | -4,74  | 0,00009 | NM_013351       | ---          |
| 8171336 | -2,36 | -5,13 | 0,04108 | -3,07 | -8,38  | 0,00013 | ---             | TNRC18       |
| 8137959 | -2,36 | -5,13 | 0,00727 | -2,91 | -7,49  | 0,00246 | NM_001080495    | ---          |
| 7974914 | -2,36 | -5,13 | 0,02087 | -3,28 | -9,73  | 0,00919 | ---             | ---          |
| 8061402 | -2,36 | -5,14 | 0,01332 | -2,41 | -5,32  | 0,00170 | ---             | ---          |
| 8133221 | -2,37 | -5,15 | 0,00738 | -3,91 | -14,99 | 0,00039 | ---             | ---          |
| 7999725 | -2,37 | -5,15 | 0,00081 | -2,37 | -5,18  | 0,00028 | ---             | PROP1        |
| 8116162 | -2,38 | -5,19 | 0,01970 | -3,18 | -9,06  | 0,00108 | NM_006261       | ---          |
| 8142979 | -2,38 | -5,20 | 0,00785 | -3,05 | -8,30  | 0,00001 | ---             | C2CD4C       |
| 8032034 | -2,38 | -5,21 | 0,01853 | -2,98 | -7,90  | 0,00027 | NM_001136263    | RPRML        |
| 8016320 | -2,38 | -5,22 | 0,01441 | -2,41 | -5,31  | 0,00068 | NM_203400       | ---          |
| 8001371 | -2,38 | -5,22 | 0,00617 | -2,78 | -6,85  | 0,00147 | ---             | GAGE12B      |
| 8167575 | -2,39 | -5,22 | 0,03383 | -3,43 | -10,79 | 0,00093 | NM_001127345    | ---          |
| 8076461 | -2,39 | -5,23 | 0,00123 | -0,89 | -1,86  | 0,01999 | ---             | ---          |
| 8107996 | -2,39 | -5,23 | 0,02446 | -4,42 | -21,38 | 0,00008 | ---             | ---          |
| 7971165 | -2,39 | -5,25 | 0,00089 | -2,15 | -4,43  | 0,01394 | ---             | ---          |
| 8051812 | -2,39 | -5,26 | 0,00513 | -2,14 | -4,40  | 0,04595 | ---             | ---          |
| 8146941 | -2,40 | -5,27 | 0,00412 | -3,34 | -10,16 | 0,00105 | ---             | ARIH2        |
| 8087234 | -2,40 | -5,29 | 0,01752 | -2,36 | -5,13  | 0,02059 | ENST00000449376 | ---          |
| 8090462 | -2,40 | -5,29 | 0,02755 | -3,39 | -10,50 | 0,00005 | ---             | TMEM211      |
| 8075049 | -2,40 | -5,29 | 0,00399 | -1,69 | -3,23  | 0,00376 | NM_001001663    | PAGE5        |
| 8167880 | -2,41 | -5,30 | 0,00841 | -1,28 | -2,42  | 0,00798 | NM_130467       | ---          |
| 8050363 | -2,41 | -5,32 | 0,00356 | -3,35 | -10,23 | 0,00000 | ---             | IGSF9B       |
| 7952810 | -2,41 | -5,32 | 0,07927 | -2,30 | -4,92  | 0,00011 | NM_014987       | ---          |
| 7914938 | -2,41 | -5,33 | 0,00247 | -2,56 | -5,91  | 0,00017 | ---             | FRG2C        |
| 8080998 | -2,41 | -5,33 | 0,06885 | -4,64 | -24,91 | 0,00020 | ENST00000455344 | C9orf140     |
| 8165430 | -2,42 | -5,34 | 0,00141 | -1,67 | -3,17  | 0,00503 | NM_178448       | ---          |

|         |       |       |         |       |        |         |                 |              |     |
|---------|-------|-------|---------|-------|--------|---------|-----------------|--------------|-----|
| 8071951 | -2,42 | -5,35 | 0,00422 | -2,23 | -4,69  | 0,04054 | ---             | RTN4RL2      |     |
| 7940022 | -2,42 | -5,35 | 0,00638 | 0,94  | 1,92   | 0,18569 | NM_178570       | ---          |     |
| 7937198 | -2,42 | -5,35 | 0,00746 | -2,69 | -6,45  | 0,00534 | ---             | FLJ35934     | --- |
| 8005444 | -2,42 | -5,36 | 0,05638 | -3,43 | -10,79 | 0,00162 | ENST00000407600 | FOX E1       |     |
| 8156743 | -2,42 | -5,36 | 0,02829 | 0,10  | 1,07   | 0,78944 | NM_004473       | IGFBPL1      |     |
| 8161265 | -2,43 | -5,39 | 0,00894 | -1,10 | -2,14  | 0,06238 | NM_001007563    | ---          |     |
| 7942542 | -2,43 | -5,39 | 0,00797 | -2,07 | -4,19  | 0,00094 | ---             | LOC642648    |     |
| 8076747 | -2,43 | -5,39 | 0,01391 | -2,05 | -4,13  | 0,01079 | AK123383        | ---          |     |
| 7969339 | -2,43 | -5,39 | 0,00248 | -1,39 | -2,62  | 0,00004 | ---             | ---          |     |
| 7988346 | -2,43 | -5,40 | 0,03063 | -3,62 | -12,26 | 0,00011 | ---             | DPCR1        |     |
| 8179221 | -2,44 | -5,41 | 0,01459 | -1,00 | -2,01  | 0,14698 | NM_080870       | ---          |     |
| 7899348 | -2,44 | -5,43 | 0,00550 | -2,69 | -6,46  | 0,00028 | ---             | LOC440461    |     |
| 8009430 | -2,45 | -5,46 | 0,01048 | -3,47 | -11,09 | 0,00068 | NR_027283       | ---          |     |
| 8162177 | -2,45 | -5,47 | 0,00608 | -2,56 | -5,91  | 0,00092 | ---             | ALX3         |     |
| 7918416 | -2,46 | -5,50 | 0,00222 | -1,57 | -2,97  | 0,01944 | NM_006492       | ---          |     |
| 8130470 | -2,46 | -5,52 | 0,03604 | -3,51 | -11,42 | 0,00231 | ---             | ---          |     |
| 8170280 | -2,47 | -5,52 | 0,02323 | -1,70 | -3,25  | 0,02015 | ---             | ---          |     |
| 8146305 | -2,47 | -5,54 | 0,11190 | -2,87 | -7,33  | 0,00106 | ---             | ---          |     |
| 8000465 | -2,47 | -5,56 | 0,00311 | -2,82 | -7,07  | 0,00016 | ---             | MIR185       |     |
| 8071312 | -2,48 | -5,57 | 0,03237 | -4,69 | -25,84 | 0,00000 | NR_029706       | ---          |     |
| 8105631 | -2,48 | -5,57 | 0,00771 | -2,26 | -4,79  | 0,00701 | ---             | ACTL9        |     |
| 8033662 | -2,48 | -5,57 | 0,00403 | -2,97 | -7,81  | 0,00000 | NM_178525       | PEX11G       |     |
| 8033385 | -2,48 | -5,58 | 0,00473 | -2,41 | -5,30  | 0,00106 | NM_080662       | ---          |     |
| 8014023 | -2,48 | -5,59 | 0,00933 | -3,45 | -10,93 | 0,00020 | ---             | LOC399744    |     |
| 7927091 | -2,48 | -5,59 | 0,00240 | -0,77 | -1,71  | 0,02924 | NR_024497       | KRTAP10-12   |     |
| 8069168 | -2,48 | -5,59 | 0,01650 | -4,24 | -18,86 | 0,00095 | NM_198699       | ---          |     |
| 7925902 | -2,49 | -5,62 | 0,00123 | -2,38 | -5,20  | 0,00006 | ---             | ---          |     |
| 7985032 | -2,49 | -5,63 | 0,00158 | -1,30 | -2,46  | 0,03592 | ---             | ---          |     |
| 8077169 | -2,49 | -5,63 | 0,00481 | -3,25 | -9,52  | 0,00022 | ---             | ---          |     |
| 8002209 | -2,50 | -5,64 | 0,02184 | -3,26 | -9,60  | 0,00218 | ---             | KRTAP12-4    |     |
| 8070789 | -2,50 | -5,66 | 0,00668 | -3,36 | -10,26 | 0,00026 | NM_198698       | LOC100287093 |     |
| 8132978 | -2,51 | -5,68 | 0,05998 | -3,92 | -15,09 | 0,00370 | ENST00000447142 | LOC285780    |     |
| 8123760 | -2,51 | -5,69 | 0,05713 | -2,93 | -7,64  | 0,00877 | NR_026970       | ---          |     |
| 7992269 | -2,51 | -5,69 | 0,00906 | -3,23 | -9,36  | 0,00129 | ---             | ---          |     |
| 7965469 | -2,51 | -5,69 | 0,00489 | -1,97 | -3,91  | 0,00009 | ---             | ---          |     |
| 8108013 | -2,51 | -5,70 | 0,02797 | -3,98 | -15,74 | 0,00167 | ---             | PSORS1C2     |     |
| 8178445 | -2,51 | -5,70 | 0,00670 | -3,64 | -12,45 | 0,00094 | NM_014069       | ---          |     |
| 7986442 | -2,51 | -5,71 | 0,12810 | -3,53 | -11,54 | 0,00622 | ---             | ---          |     |
| 8095358 | -2,52 | -5,72 | 0,00864 | -2,67 | -6,38  | 0,00901 | ---             | ---          |     |
| 8154870 | -2,52 | -5,72 | 0,00173 | -2,91 | -7,54  | 0,00041 | ---             | ---          |     |
| 8065330 | -2,52 | -5,73 | 0,00256 | -2,15 | -4,45  | 0,00274 | ---             | ---          |     |
| 8096333 | -2,52 | -5,74 | 0,00251 | -3,06 | -8,35  | 0,00003 | ---             | ---          |     |
| 7907010 | -2,52 | -5,74 | 0,01262 | -2,21 | -4,62  | 0,00394 | ---             | ---          |     |
| 8085112 | -2,53 | -5,76 | 0,00100 | -1,53 | -2,89  | 0,00286 | ---             | ---          |     |
| 8028643 | -2,53 | -5,79 | 0,01520 | -4,36 | -20,56 | 0,00112 | ---             | ---          |     |
| 8103023 | -2,53 | -5,79 | 0,02620 | -2,50 | -5,66  | 0,04855 | ---             | ---          |     |
| 7898723 | -2,54 | -5,81 | 0,01178 | -3,19 | -9,14  | 0,00860 | ---             | ---          |     |
| 8093150 | -2,54 | -5,81 | 0,03299 | -3,14 | -8,79  | 0,00019 | ---             | ---          |     |
| 7952671 | -2,54 | -5,82 | 0,01041 | -2,90 | -7,46  | 0,00002 | ---             | LOC100287293 |     |
| 8088905 | -2,54 | -5,82 | 0,04211 | -2,54 | -5,83  | 0,01006 | ENST00000442426 | ---          |     |
| 7929536 | -2,54 | -5,83 | 0,00014 | -3,13 | -8,76  | 0,02532 | ---             | ---          |     |
| 7979980 | -2,55 | -5,85 | 0,00615 | -2,72 | -6,58  | 0,00411 | ---             | ---          |     |
| 8096158 | -2,55 | -5,86 | 0,01736 | -2,28 | -4,85  | 0,01383 | ---             | C2orf82      |     |
| 8049239 | -2,56 | -5,89 | 0,01228 | -1,46 | -2,76  | 0,06485 | AY358535        | ---          |     |
| 8043155 | -2,56 | -5,91 | 0,00837 | -3,77 | -13,62 | 0,00008 | ---             | ---          |     |
| 8051926 | -2,56 | -5,92 | 0,00199 | -3,54 | -11,63 | 0,00079 | ---             | SPSB4        |     |
| 8083071 | -2,57 | -5,94 | 0,00289 | -1,49 | -2,82  | 0,00981 | NM_080862       | ---          |     |
| 7915284 | -2,58 | -5,97 | 0,00648 | -0,95 | -1,93  | 0,26231 | ---             | PSORS1C2     |     |
| 8124865 | -2,58 | -5,99 | 0,00361 | -3,72 | -13,16 | 0,00103 | NM_014069       | ---          |     |
| 8017827 | -2,58 | -5,99 | 0,00196 | -2,86 | -7,27  | 0,00107 | ---             | ---          |     |
| 7926636 | -2,58 | -6,00 | 0,00220 | -3,07 | -8,37  | 0,00006 | ---             | ACPT         |     |
| 8030736 | -2,59 | -6,00 | 0,00021 | -2,72 | -6,60  | 0,00025 | NM_033068       | ---          |     |
| 7969241 | -2,59 | -6,03 | 0,01805 | -2,72 | -6,60  | 0,00098 | ---             | ---          |     |
| 8157151 | -2,59 | -6,04 | 0,01272 | -3,49 | -11,22 | 0,00005 | ---             | LBX2         |     |
| 8053183 | -2,60 | -6,05 | 0,00195 | -0,84 | -1,79  | 0,10234 | NM_001009812    | ---          |     |
| 8111199 | -2,60 | -6,05 | 0,03275 | -3,52 | -11,47 | 0,07203 | ---             | SNORA80B     |     |
| 8050253 | -2,60 | -6,08 | 0,01238 | -2,87 | -7,29  | 0,01476 | NR_028374       | ---          |     |
| 7971642 | -2,61 | -6,09 | 0,01231 | -0,47 | -1,38  | 0,10935 | ---             | COL9A2       |     |
| 7915297 | -2,61 | -6,10 | 0,01194 | -2,07 | -4,21  | 0,00080 | NM_001852       | C20orf166    |     |
| 8063914 | -2,61 | -6,10 | 0,00367 | -2,90 | -7,46  | 0,00028 | NM_178463       | FLJ38668     |     |
| 8054449 | -2,61 | -6,10 | 0,01471 | -2,71 | -6,54  | 0,00239 | AK095987        | ---          |     |
| 8113367 | -2,61 | -6,12 | 0,02514 | -2,56 | -5,91  | 0,01195 | ---             | ---          |     |
| 8145622 | -2,62 | -6,14 | 0,01218 | -3,27 | -9,62  | 0,00351 | ---             | ---          |     |



|         |       |       |         |       |        |         |                 |              |  |
|---------|-------|-------|---------|-------|--------|---------|-----------------|--------------|--|
| 7902223 | -2,62 | -6,15 | 0,00817 | -3,47 | -11,11 | 0,00022 | ---             | CYS1         |  |
| 8050232 | -2,62 | -6,15 | 0,01167 | -2,97 | -7,85  | 0,00256 | NM_001037160    | POU5F1P3     |  |
| 7960878 | -2,62 | -6,16 | 0,03394 | -2,57 | -5,95  | 0,00562 | GU480887        | LOC347549    |  |
| 8172713 | -2,62 | -6,17 | 0,04640 | -3,54 | -11,59 | 0,00041 | XM_293416       | ---          |  |
| 8154386 | -2,63 | -6,17 | 0,00603 | -2,95 | -7,75  | 0,00004 | ---             | ZNF524       |  |
| 8031511 | -2,63 | -6,18 | 0,00258 | -2,40 | -5,27  | 0,00977 | NM_153219       | ---          |  |
| 7922299 | -2,63 | -6,19 | 0,01038 | -4,46 | -22,08 | 0,00029 | ---             | RNU6ATAC     |  |
| 8107855 | -2,63 | -6,20 | 0,00088 | -2,37 | -5,19  | 0,00102 | NR_023344       | ---          |  |
| 7899069 | -2,64 | -6,22 | 0,00992 | -3,47 | -11,09 | 0,00012 | ---             | ---          |  |
| 8175391 | -2,64 | -6,22 | 0,00786 | -4,10 | -17,15 | 0,00005 | ---             | LRRFIP1      |  |
| 8049534 | -2,64 | -6,22 | 0,03701 | -2,53 | -5,76  | 0,05173 | NM_001137550    | LOC652493    |  |
| 8043474 | -2,64 | -6,24 | 0,01014 | -2,84 | -7,18  | 0,06312 | ENST00000390249 | ---          |  |
| 8100227 | -2,64 | -6,25 | 0,00756 | -1,36 | -2,57  | 0,04251 | ---             | MIRLET7B     |  |
| 8073824 | -2,65 | -6,28 | 0,00729 | -2,57 | -5,95  | 0,00525 | NR_029479       | ---          |  |
| 8021440 | -2,65 | -6,29 | 0,00586 | -3,17 | -9,02  | 0,00044 | ---             | LOC100133075 |  |
| 7919582 | -2,66 | -6,30 | 0,01797 | -3,03 | -8,16  | 0,00204 | XR_039086       | ---          |  |
| 8100547 | -2,66 | -6,33 | 0,00291 | -2,83 | -7,11  | 0,00448 | ---             | ---          |  |
| 8174642 | -2,66 | -6,33 | 0,00177 | -1,95 | -3,87  | 0,00395 | ---             | FAM27E3      |  |
| 8155569 | -2,66 | -6,34 | 0,03863 | -2,87 | -7,31  | 0,00021 | BC119675        | FAM27E3      |  |
| 8161426 | -2,66 | -6,34 | 0,03863 | -2,87 | -7,31  | 0,00021 | BC119675        | FAM27E3      |  |
| 8161437 | -2,66 | -6,34 | 0,03863 | -2,87 | -7,31  | 0,00021 | BC119675        | ---          |  |
| 7932510 | -2,67 | -6,35 | 0,00626 | -3,23 | -9,36  | 0,00065 | ---             | ---          |  |
| 7915074 | -2,68 | -6,40 | 0,09347 | -3,26 | -9,55  | 0,00646 | ---             | LOC100129785 |  |
| 8158625 | -2,68 | -6,43 | 0,00954 | -3,83 | -14,18 | 0,00005 | AK125285        | SSBP4        |  |
| 8027006 | -2,69 | -6,44 | 0,00108 | -2,35 | -5,11  | 0,00321 | NM_032627       | ---          |  |
| 7899287 | -2,69 | -6,45 | 0,00750 | -2,90 | -7,48  | 0,00079 | ---             | ---          |  |
| 7972663 | -2,70 | -6,48 | 0,01298 | -4,53 | -23,16 | 0,00024 | ---             | ---          |  |
| 8061426 | -2,70 | -6,51 | 0,00110 | -1,91 | -3,77  | 0,01145 | ---             | ---          |  |
| 8170196 | -2,71 | -6,54 | 0,00487 | -3,75 | -13,46 | 0,00004 | ---             | FAM110C      |  |
| 8049965 | -2,72 | -6,60 | 0,01020 | -2,33 | -5,03  | 0,00402 | NM_001077710    | ---          |  |
| 8067183 | -2,73 | -6,63 | 0,01389 | -4,02 | -16,26 | 0,00023 | ---             | ---          |  |
| 8053662 | -2,73 | -6,64 | 0,01477 | -3,42 | -10,74 | 0,04755 | ---             | ---          |  |
| 8046426 | -2,74 | -6,66 | 0,01161 | -2,05 | -4,14  | 0,00764 | ---             | ---          |  |
| 7931079 | -2,75 | -6,72 | 0,00201 | -3,44 | -10,89 | 0,00684 | ---             | ---          |  |
| 8023218 | -2,76 | -6,76 | 0,01269 | -3,59 | -12,04 | 0,00053 | ---             | ---          |  |
| 7964718 | -2,76 | -6,76 | 0,01707 | -4,26 | -19,15 | 0,00013 | ---             | LCE1F        |  |
| 7905517 | -2,76 | -6,76 | 0,01357 | -2,99 | -7,95  | 0,00001 | NM_178354       | ---          |  |
| 8102160 | -2,76 | -6,77 | 0,01855 | -0,75 | -1,68  | 0,02376 | ---             | ---          |  |
| 7964596 | -2,76 | -6,77 | 0,00255 | -2,13 | -4,37  | 0,00438 | ---             | ---          |  |
| 8118098 | -2,76 | -6,77 | 0,00313 | -2,59 | -6,02  | 0,00122 | ---             | ---          |  |
| 8114643 | -2,76 | -6,78 | 0,00980 | -3,31 | -9,95  | 0,01050 | ---             | ---          |  |
| 7904879 | -2,76 | -6,79 | 0,02000 | -3,46 | -10,97 | 0,00141 | ---             | ---          |  |
| 8126301 | -2,76 | -6,79 | 0,00774 | -4,15 | -17,76 | 0,00029 | ---             | ---          |  |
| 7967082 | -2,77 | -6,83 | 0,00295 | -3,66 | -12,67 | 0,00000 | ---             | ---          |  |
| 8005243 | -2,78 | -6,85 | 0,00285 | -2,58 | -5,96  | 0,00715 | ---             | ---          |  |
| 7918550 | -2,78 | -6,88 | 0,00411 | -3,87 | -14,57 | 0,00253 | ---             | TP73         |  |
| 7897179 | -2,78 | -6,89 | 0,05172 | -4,99 | -31,88 | 0,00006 | NM_001126240    | ---          |  |
| 8006121 | -2,79 | -6,92 | 0,00480 | -4,21 | -18,54 | 0,00001 | ---             | ---          |  |
| 8104115 | -2,79 | -6,93 | 0,00695 | -2,72 | -6,60  | 0,00009 | ---             | ---          |  |
| 8124020 | -2,79 | -6,94 | 0,00413 | -4,10 | -17,16 | 0,00007 | ---             | ---          |  |
| 8018377 | -2,80 | -6,95 | 0,00554 | -3,60 | -12,14 | 0,00107 | ---             | ---          |  |
| 8063380 | -2,81 | -7,00 | 0,00495 | -4,25 | -19,03 | 0,00008 | ---             | C20orf191    |  |
| 8065541 | -2,81 | -7,03 | 0,00036 | -2,27 | -4,82  | 0,00052 | NR_003678       | ---          |  |
| 7970390 | -2,81 | -7,03 | 0,00340 | -2,67 | -6,37  | 0,00847 | ---             | ---          |  |
| 8067842 | -2,81 | -7,03 | 0,00340 | -2,67 | -6,37  | 0,00847 | ---             | ---          |  |
| 8152701 | -2,82 | -7,04 | 0,01825 | -4,63 | -24,82 | 0,00001 | ---             | FAM115A      |  |
| 8143605 | -2,83 | -7,09 | 0,00939 | -0,36 | -1,28  | 0,45271 | AK291605        | ---          |  |
| 8112070 | -2,83 | -7,10 | 0,01947 | -2,83 | -7,12  | 0,00477 | ---             | ---          |  |
| 8121739 | -2,85 | -7,23 | 0,00479 | -3,51 | -11,35 | 0,00000 | ---             | ---          |  |
| 8175568 | -2,87 | -7,31 | 0,00289 | -3,44 | -10,87 | 0,00010 | ---             | ARHGAP23     |  |
| 8006786 | -2,87 | -7,32 | 0,01003 | -3,15 | -8,90  | 0,00058 | NM_020876       | ---          |  |
| 8168161 | -2,87 | -7,33 | 0,00848 | -3,49 | -11,27 | 0,00397 | ---             | ---          |  |
| 7975457 | -2,89 | -7,41 | 0,08735 | -1,63 | -3,09  | 0,00271 | ---             | CSH2         |  |
| 8017476 | -2,91 | -7,50 | 0,00855 | -1,25 | -2,38  | 0,18208 | NM_022644       | ---          |  |
| 7918365 | -2,91 | -7,52 | 0,00756 | -4,77 | -27,23 | 0,00004 | ---             | TPSD1        |  |
| 7992191 | -2,91 | -7,52 | 0,01443 | -2,88 | -7,37  | 0,00118 | NM_012217       | ---          |  |
| 7901744 | -2,91 | -7,53 | 0,00121 | -3,27 | -9,68  | 0,00043 | ---             | ---          |  |
| 7922297 | -2,92 | -7,55 | 0,00161 | -3,14 | -8,79  | 0,00018 | ---             | ---          |  |
| 7947421 | -2,92 | -7,56 | 0,02680 | -4,50 | -22,56 | 0,00175 | ---             | MRPL36       |  |
| 8110861 | -2,92 | -7,57 | 0,04604 | -2,08 | -4,23  | 0,00822 | NM_032479       | ---          |  |
| 8005657 | -2,94 | -7,67 | 0,02073 | -4,72 | -26,36 | 0,00022 | ---             | ---          |  |
| 8096777 | -2,95 | -7,72 | 0,00319 | -2,45 | -5,45  | 0,00689 | ---             | ---          |  |
| 8076509 | -2,96 | -7,77 | 0,00116 | -3,27 | -9,62  | 0,00105 | ---             | ---          |  |

|         |       |        |         |       |        |         |              |              |
|---------|-------|--------|---------|-------|--------|---------|--------------|--------------|
| 8174226 | -2,96 | -7,78  | 0,04171 | -4,87 | -29,23 | 0,00098 | ---          | ---          |
| 7996239 | -2,96 | -7,79  | 0,00141 | -3,18 | -9,09  | 0,00003 | ---          | IL28A        |
| 8028607 | -2,99 | -7,95  | 0,00118 | -2,75 | -6,75  | 0,00070 | NM_172138    | ---          |
| 8078136 | -2,99 | -7,96  | 0,00737 | -3,38 | -10,43 | 0,00154 | ---          | ---          |
| 7981425 | -2,99 | -7,96  | 0,01278 | -3,90 | -14,97 | 0,00092 | ---          | ---          |
| 8045814 | -3,01 | -8,03  | 0,01490 | -4,06 | -16,71 | 0,00004 | ---          | ---          |
| 8073511 | -3,01 | -8,06  | 0,02125 | -4,08 | -16,93 | 0,00035 | ---          | LOC100288034 |
| 8073309 | -3,04 | -8,21  | 0,00521 | -4,38 | -20,86 | 0,00062 | XM_002346783 | RN18S1       |
| 7954310 | -3,04 | -8,23  | 0,01309 | -3,28 | -9,71  | 0,01025 | NR_003286    | KRTAP10-1    |
| 8070771 | -3,04 | -8,25  | 0,01989 | -3,57 | -11,89 | 0,00023 | NM_198691    | ---          |
| 7921621 | -3,06 | -8,31  | 0,03580 | -2,32 | -4,99  | 0,03008 | ---          | ---          |
| 8064098 | -3,06 | -8,33  | 0,02616 | -4,10 | -17,10 | 0,00885 | ---          | NKX2-4       |
| 8065327 | -3,07 | -8,38  | 0,00788 | -2,38 | -5,21  | 0,04701 | NM_033176    | ---          |
| 7946849 | -3,07 | -8,40  | 0,00874 | -3,54 | -11,60 | 0,00007 | ---          | ---          |
| 8006181 | -3,08 | -8,47  | 0,04842 | -4,18 | -18,09 | 0,00039 | ---          | ---          |
| 8152240 | -3,09 | -8,51  | 0,00154 | -3,53 | -11,59 | 0,00015 | ---          | ---          |
| 8162082 | -3,09 | -8,51  | 0,00829 | -1,10 | -2,14  | 0,04109 | ---          | CELP         |
| 8158987 | -3,09 | -8,52  | 0,00860 | -4,61 | -24,42 | 0,00006 | NR_001275    | ---          |
| 8002270 | -3,11 | -8,62  | 0,01144 | -4,71 | -26,12 | 0,00011 | ---          | ---          |
| 8139201 | -3,12 | -8,68  | 0,00888 | -4,72 | -26,35 | 0,00020 | ---          | ---          |
| 7932883 | -3,12 | -8,69  | 0,00309 | -4,17 | -18,06 | 0,00045 | ---          | ---          |
| 7942812 | -3,12 | -8,70  | 0,00496 | -3,88 | -14,72 | 0,00032 | ---          | ---          |
| 8040477 | -3,13 | -8,73  | 0,01176 | -4,46 | -22,07 | 0,00052 | ---          | ---          |
| 7951089 | -3,13 | -8,77  | 0,00768 | -4,20 | -18,32 | 0,00002 | ---          | ---          |
| 8008644 | -3,15 | -8,89  | 0,01631 | -4,94 | -30,71 | 0,00024 | ---          | ---          |
| 8117118 | -3,18 | -9,04  | 0,01325 | -4,23 | -18,80 | 0,00031 | ---          | ---          |
| 7942877 | -3,18 | -9,04  | 0,00514 | -4,38 | -20,87 | 0,00002 | ---          | LOC146336    |
| 7998405 | -3,19 | -9,15  | 0,00569 | -0,65 | -1,56  | 0,23339 | NR_027242    | ---          |
| 8066391 | -3,21 | -9,27  | 0,00936 | -4,07 | -16,74 | 0,00096 | ---          | LOC100133091 |
| 8133752 | -3,23 | -9,41  | 0,00180 | -2,33 | -5,04  | 0,05309 | NR_029411    | ---          |
| 8047286 | -3,26 | -9,59  | 0,00798 | -4,51 | -22,71 | 0,00006 | ---          | LOC441268    |
| 8141166 | -3,26 | -9,60  | 0,00942 | -3,32 | -9,98  | 0,00213 | AK125166     | ---          |
| 8010084 | -3,27 | -9,64  | 0,00173 | -4,08 | -16,95 | 0,00018 | ---          | ---          |
| 8136471 | -3,27 | -9,66  | 0,00886 | -4,86 | -28,98 | 0,00003 | ---          | ---          |
| 7958842 | -3,27 | -9,66  | 0,02493 | -3,56 | -11,82 | 0,00660 | ---          | ---          |
| 8048075 | -3,31 | -9,94  | 0,00874 | -4,59 | -24,02 | 0,00000 | ---          | ---          |
| 7959925 | -3,32 | -9,97  | 0,00082 | -3,87 | -14,66 | 0,00007 | ---          | ---          |
| 7967705 | -3,32 | -9,97  | 0,00082 | -3,87 | -14,66 | 0,00007 | ---          | ---          |
| 8130660 | -3,32 | -9,99  | 0,00107 | -2,61 | -6,11  | 0,00307 | ---          | ---          |
| 8176949 | -3,33 | -10,03 | 0,00102 | -2,83 | -7,12  | 0,00089 | ---          | LOC441208    |
| 8132209 | -3,35 | -10,18 | 0,00473 | -2,48 | -5,59  | 0,00762 | NR_003502    | ---          |
| 7958011 | -3,37 | -10,31 | 0,00965 | -4,72 | -26,42 | 0,00021 | ---          | ---          |
| 7969368 | -3,38 | -10,38 | 0,00978 | -4,65 | -25,17 | 0,00017 | ---          | ---          |
| 7961363 | -3,41 | -10,60 | 0,00989 | -4,55 | -23,47 | 0,00031 | ---          | ---          |
| 7945158 | -3,41 | -10,65 | 0,01308 | -4,68 | -25,62 | 0,00000 | ---          | ---          |
| 7925509 | -3,42 | -10,72 | 0,01226 | -4,94 | -30,78 | 0,00011 | ---          | ---          |
| 7945892 | -3,43 | -10,75 | 0,01120 | -4,72 | -26,32 | 0,00002 | ---          | ---          |
| 7923436 | -3,43 | -10,77 | 0,00256 | -3,35 | -10,22 | 0,00079 | ---          | ---          |
| 8058496 | -3,43 | -10,77 | 0,00715 | -4,26 | -19,13 | 0,00211 | ---          | ---          |
| 8081820 | -3,44 | -10,83 | 0,00306 | -3,72 | -13,18 | 0,00035 | ---          | ---          |
| 8042109 | -3,46 | -11,04 | 0,00572 | -3,96 | -15,62 | 0,00024 | ---          | ---          |
| 7968798 | -3,48 | -11,17 | 0,00597 | -4,38 | -20,83 | 0,00016 | ---          | ---          |
| 7902493 | -3,49 | -11,24 | 0,00497 | -4,44 | -21,76 | 0,00008 | ---          | ---          |
| 7913665 | -3,51 | -11,38 | 0,01039 | -4,80 | -27,84 | 0,00007 | ---          | DOC2B        |
| 8010901 | -3,53 | -11,57 | 0,00000 | -1,91 | -3,75  | 0,01973 | NM_003585    | ---          |
| 8061562 | -3,54 | -11,67 | 0,00967 | -4,81 | -27,99 | 0,00007 | ---          | ---          |
| 7922752 | -3,60 | -12,14 | 0,04345 | -4,78 | -27,42 | 0,00000 | ---          | ---          |
| 8002379 | -3,73 | -13,24 | 0,01619 | -4,19 | -18,19 | 0,00030 | ---          | ---          |
| 7999362 | -3,76 | -13,55 | 0,01187 | -3,56 | -11,83 | 0,03075 | ---          | ---          |
| 8013985 | -3,83 | -14,24 | 0,00436 | -3,67 | -12,76 | 0,00031 | ---          | ---          |
| 8051028 | -3,85 | -14,40 | 0,00128 | -3,27 | -9,63  | 0,09911 | ---          | ---          |
| 8163271 | -4,12 | -17,36 | 0,00084 | -4,48 | -22,35 | 0,00017 | ---          | ---          |
